# Supplementary material for: Amyotrophic lateral sclerosis, gene deregulation in the anterior horn of the spinal cord and frontal cortex area 8: implications in frontotemporal lobar degeneration
Source: PubMed Central journal article supplement (PMC5391234; doi:10.18632/aging.101195), 2017-03-09
Supplement: aging-09-823-s003.pdf [file aging-09-823-s003.pdf]

| Gene symbol      | logFC  | Fold Change | AveExpr | t      |
|------------------|--------|-------------|---------|--------|
| A1BG-AS1         | 0.053  | 1.037       | 3.668   | 0.173  |
| A2M//HDAC1       | -0.100 | 0.933       | 7.771   | -0.327 |
| A2M-AS1          | -0.433 | 0.741       | 4.273   | -1.560 |
| A2ML1            | -0.258 | 0.836       | 2.737   | -0.927 |
| AACS             | 0.497  | 1.412       | 5.535   | 1.840  |
| AAED1            | 0.359  | 1.283       | 4.270   | 1.413  |
| AAGAB            | 0.445  | 1.362       | 4.495   | 2.058  |
| AAK1             | 0.592  | 1.508       | 7.244   | 2.410  |
| AASDHPPT         | 0.392  | 1.312       | 5.760   | 1.747  |
| AASS             | -0.543 | 0.686       | 6.842   | -1.927 |
| AATK             | -0.449 | 0.733       | 6.203   | -1.669 |
| ABCA1            | -1.034 | 0.488       | 5.808   | -2.789 |
| ABCA10           | 0.527  | 1.441       | 2.297   | 1.943  |
| ABCA17P          | 0.162  | 1.119       | 2.505   | 0.541  |
| ABCA2            | -0.923 | 0.527       | 9.158   | -2.783 |
| ABCA5            | 0.240  | 1.181       | 6.465   | 0.980  |
| ABCA6            | -1.673 | 0.314       | 5.813   | -2.552 |
| ABCA8            | -1.552 | 0.341       | 6.900   | -3.431 |
| ABCA9            | -0.372 | 0.772       | 5.280   | -1.006 |
| ABCC1            | -0.200 | 0.870       | 5.556   | -0.936 |
| ABCC11           | 0.109  | 1.078       | 2.134   | 0.445  |
| ABCC3            | -0.471 | 0.721       | 3.902   | -0.902 |
| ABCC4            | -0.454 | 0.730       | 5.072   | -1.594 |
| ABCC5            | 0.193  | 1.143       | 6.195   | 0.882  |
| ABCC8            | 0.231  | 1.174       | 4.582   | 0.819  |
| ABCC9            | 0.561  | 1.475       | 6.267   | 1.678  |
| ABCD2            | 1.043  | 2.061       | 5.017   | 2.493  |
| ABCD4            | -0.270 | 0.829       | 4.718   | -1.183 |
| ABCG1            | -0.102 | 0.932       | 5.472   | -0.431 |
| ABCG2            | -0.297 | 0.814       | 5.791   | -0.888 |
| ABCG4            | 0.853  | 1.806       | 4.414   | 2.278  |
| ABHD12B//MIR4454 | 0.981  | 1.974       | 3.146   | 3.135  |
| ABHD13           | 0.375  | 1.297       | 5.667   | 1.934  |
| ABHD15           | -0.871 | 0.547       | 3.657   | -3.084 |
| ABHD16B          | 0.171  | 1.126       | 2.402   | 0.798  |
| ABHD17A          | 0.341  | 1.266       | 2.873   | 1.323  |
| ABHD17B          | -0.301 | 0.812       | 6.296   | -1.045 |
| ABHD3            | -0.557 | 0.680       | 4.498   | -2.015 |
| ABHD4            | -0.374 | 0.771       | 5.625   | -1.199 |
| ABHD5            | -0.495 | 0.709       | 4.976   | -1.820 |
| ABHD8            | 0.747  | 1.678       | 5.807   | 2.048  |
| ABI3             | -0.532 | 0.691       | 4.734   | -1.513 |
| ABI3BP           | -0.740 | 0.599       | 5.402   | -1.832 |
| ABL1             | -0.564 | 0.676       | 7.261   | -2.773 |
| ABLIM2           | 0.768  | 1.703       | 5.351   | 1.998  |
| ABLIM3           | -0.106 | 0.929       | 6.305   | -0.411 |
| ABRACL           | 0.587  | 1.503       | 3.256   | 1.972  |
| ABT1             | 0.040  | 1.028       | 4.191   | 0.170  |
| ABTB1            | 0.403  | 1.322       | 3.754   | 1.693  |

|                          |        |       |       |        |
|--------------------------|--------|-------|-------|--------|
| ABTB2                    | -0.876 | 0.545 | 5.749 | -2.203 |
| AC002117.1               | -0.506 | 0.704 | 4.514 | -1.773 |
| AC002310.12              | -0.440 | 0.737 | 3.805 | -1.515 |
| AC002310.7               | 0.004  | 1.003 | 2.511 | 0.017  |
| AC002429.5               | 0.152  | 1.111 | 3.586 | 0.487  |
| AC004540.4               | 0.151  | 1.110 | 2.952 | 0.464  |
| AC004951.6               | -0.469 | 0.723 | 5.354 | -1.837 |
| AC005220.3               | -0.428 | 0.743 | 2.299 | -1.315 |
| AC005237.4               | -0.112 | 0.925 | 2.093 | -0.321 |
| AC005518.2               | -0.362 | 0.778 | 4.455 | -0.731 |
| AC006003.3               | 0.285  | 1.219 | 3.375 | 1.003  |
| AC006070.12              | 0.512  | 1.426 | 4.592 | 1.911  |
| AC006160.5               | -0.402 | 0.757 | 3.770 | -1.566 |
| AC006947.1               | -0.273 | 0.827 | 2.863 | -1.044 |
| AC007036.4               | -0.499 | 0.708 | 4.274 | -1.450 |
| AC007098.1               | 0.803  | 1.745 | 2.363 | 2.824  |
| AC007106.1               | -0.083 | 0.944 | 2.755 | -0.270 |
| AC007383.3               | -0.036 | 0.975 | 3.021 | -0.132 |
| AC008269.2               | 0.580  | 1.495 | 4.640 | 1.642  |
| AC008277.1               | -0.342 | 0.789 | 3.666 | -1.206 |
| AC008440.10              | -0.899 | 0.536 | 2.785 | -3.080 |
| AC008440.5               | 0.054  | 1.038 | 3.147 | 0.195  |
| AC008746.3               | -0.241 | 0.846 | 2.486 | -0.885 |
| AC009110.1               | -1.410 | 0.376 | 2.183 | -1.979 |
| AC009262.2               | 0.393  | 1.313 | 2.875 | 1.400  |
| AC009495.2               | -0.214 | 0.862 | 2.371 | -0.885 |
| AC009495.3               | 0.237  | 1.179 | 3.163 | 0.922  |
| AC011196.3               | 0.257  | 1.195 | 2.444 | 0.821  |
| AC011247.3               | 0.224  | 1.168 | 2.200 | 0.949  |
| AC011330.5//PPIP5K1      | 0.673  | 1.595 | 3.255 | 2.463  |
| AC011891.5               | -0.689 | 0.620 | 2.313 | -1.429 |
| AC011995.1               | 0.699  | 1.623 | 3.483 | 1.947  |
| AC012074.2//LOC100131510 | 0.350  | 1.274 | 3.103 | 1.312  |
| AC012442.6               | -0.376 | 0.770 | 2.917 | -1.337 |
| AC012507.4               | 0.272  | 1.207 | 2.363 | 0.937  |
| AC012593.1               | -0.811 | 0.570 | 2.322 | -1.865 |
| AC015936.3               | -0.458 | 0.728 | 5.909 | -1.411 |
| AC016745.3               | 0.275  | 1.210 | 3.716 | 1.032  |
| AC017002.2               | 0.605  | 1.521 | 2.197 | 2.188  |
| AC018685.1               | 0.313  | 1.242 | 2.896 | 1.205  |
| AC018816.3               | 0.022  | 1.015 | 2.564 | 0.072  |
| AC020594.5               | -0.740 | 0.599 | 2.258 | -2.683 |
| AC023481.1               | -1.460 | 0.364 | 3.740 | -2.765 |
| AC025165.8               | 0.611  | 1.527 | 2.459 | 2.457  |
| AC026202.3               | -0.600 | 0.660 | 2.534 | -1.832 |
| AC053503.6               | 0.495  | 1.410 | 2.617 | 0.856  |
| AC061961.2               | 0.411  | 1.329 | 3.113 | 1.584  |
| AC067956.1               | 0.940  | 1.918 | 2.470 | 2.546  |
| AC067961.1               | 0.439  | 1.356 | 2.323 | 1.523  |
| AC068490.1               | 1.479  | 2.788 | 2.391 | 2.891  |

|                          |        |       |       |        |
|--------------------------|--------|-------|-------|--------|
| AC068580.5               | 0.076  | 1.054 | 3.923 | 0.288  |
| AC068580.6               | -0.005 | 0.996 | 2.394 | -0.020 |
| AC073283.7               | -0.413 | 0.751 | 3.713 | -1.651 |
| AC073834.3               | -0.147 | 0.903 | 2.601 | -0.494 |
| AC073842.19              | 0.467  | 1.382 | 2.455 | 1.523  |
| AC074183.4               | -0.257 | 0.837 | 3.293 | -0.846 |
| AC074363.1//B3GALT1      | 0.917  | 1.889 | 3.368 | 3.200  |
| AC078852.2               | -0.358 | 0.780 | 2.802 | -1.398 |
| AC078883.4               | 0.344  | 1.269 | 2.737 | 1.450  |
| AC079154.1               | 0.923  | 1.897 | 2.959 | 2.922  |
| AC079354.5               | 0.036  | 1.026 | 2.240 | 0.153  |
| AC079779.4               | 0.057  | 1.040 | 2.400 | 0.238  |
| AC079790.2               | 1.132  | 2.192 | 1.519 | 3.938  |
| AC083899.3               | 0.244  | 1.184 | 5.425 | 0.742  |
| AC084149.2               | -0.305 | 0.810 | 2.577 | -0.940 |
| AC090044.2               | -0.482 | 0.716 | 4.578 | -1.358 |
| AC091729.8               | -0.517 | 0.699 | 3.424 | -1.969 |
| AC092168.2               | 0.124  | 1.090 | 3.192 | 0.419  |
| AC092171.4               | 0.211  | 1.158 | 2.362 | 0.835  |
| AC092661.1               | 1.861  | 3.632 | 2.372 | 4.017  |
| AC092675.3               | -0.272 | 0.828 | 2.548 | -0.937 |
| AC092835.2               | -0.063 | 0.957 | 5.260 | -0.309 |
| AC093110.3               | -0.560 | 0.678 | 3.305 | -1.822 |
| AC093388.3               | -0.514 | 0.700 | 5.549 | -2.112 |
| AC093843.1               | 0.560  | 1.474 | 1.829 | 1.646  |
| AC102953.6               | -0.435 | 0.740 | 2.340 | -1.728 |
| AC103564.7               | 0.293  | 1.225 | 2.259 | 0.999  |
| AC107072.2               | -0.454 | 0.730 | 3.060 | -0.846 |
| AC109826.1//LOC101927070 | -0.147 | 0.903 | 3.377 | -0.536 |
| AC113617.1               | 1.154  | 2.225 | 1.834 | 3.364  |
| AC114730.2               | 0.140  | 1.102 | 3.125 | 0.459  |
| AC114730.7               | -0.051 | 0.965 | 2.324 | -0.168 |
| AC114877.3               | 0.233  | 1.175 | 4.062 | 0.693  |
| AC123886.2               | 0.281  | 1.215 | 3.154 | 0.884  |
| AC140481.4               | -0.586 | 0.666 | 2.300 | -1.443 |
| AC144449.1//LOC101929231 | -0.472 | 0.721 | 3.858 | -1.677 |
| AC144835.1               | -1.209 | 0.433 | 2.649 | -1.974 |
| AC159540.1//LOC100506123 | 0.152  | 1.111 | 5.848 | 0.410  |
| AC159540.2               | -0.038 | 0.974 | 2.940 | -0.114 |
| ACACB                    | -0.336 | 0.792 | 5.301 | -1.413 |
| ACAP1                    | 0.025  | 1.018 | 2.364 | 0.090  |
| ACAP2-IT1                | 0.748  | 1.680 | 4.178 | 2.361  |
| ACAT2                    | 0.203  | 1.151 | 5.767 | 0.687  |
| ACBD7                    | -0.063 | 0.957 | 6.707 | -0.223 |
| ACCS                     | -0.412 | 0.752 | 3.703 | -1.850 |
| ACER2                    | 0.194  | 1.144 | 4.122 | 0.731  |
| ACHE                     | -0.330 | 0.795 | 4.853 | -0.945 |
| ACKR1//DARC              | 0.657  | 1.576 | 4.827 | 1.740  |
| ACKR3                    | 0.008  | 1.006 | 3.786 | 0.028  |
| ACLY                     | 0.109  | 1.078 | 8.268 | 0.387  |

|                              |        |       |       |        |
|------------------------------|--------|-------|-------|--------|
| ACOT2                        | 0.131  | 1.095 | 4.868 | 0.497  |
| ACOX2                        | -0.521 | 0.697 | 3.930 | -2.088 |
| ACP5                         | -0.059 | 0.960 | 2.705 | -0.225 |
| ACPP                         | -0.233 | 0.851 | 3.097 | -0.508 |
| ACSBG1                       | -0.215 | 0.862 | 5.859 | -0.769 |
| ACSF2                        | -0.138 | 0.908 | 3.818 | -0.661 |
| ACSL1                        | -0.674 | 0.627 | 7.092 | -1.757 |
| ACSL4                        | 0.295  | 1.227 | 7.376 | 1.410  |
| ACSL4                        | 0.082  | 1.058 | 2.346 | 0.313  |
| ACSL5                        | 0.543  | 1.457 | 5.348 | 2.107  |
| ACSL6//LOC728637//AC034228.7 | 0.668  | 1.589 | 3.736 | 2.205  |
| ACSM5                        | 0.005  | 1.004 | 4.847 | 0.018  |
| ACSS1                        | -0.146 | 0.904 | 5.329 | -0.600 |
| ACSS3                        | 0.235  | 1.177 | 6.228 | 0.935  |
| ACTA1                        | 0.329  | 1.256 | 2.688 | 1.129  |
| ACTA2                        | 0.217  | 1.162 | 3.404 | 0.547  |
| ACTA2-AS1                    | 0.535  | 1.449 | 3.341 | 1.930  |
| ACTL6A                       | -0.463 | 0.725 | 4.024 | -1.823 |
| ACTL6B                       | 0.970  | 1.959 | 4.456 | 2.424  |
| ACTN1                        | 0.786  | 1.724 | 4.334 | 2.010  |
| ACTN2                        | -0.202 | 0.869 | 6.026 | -0.605 |
| ACTR10                       | 0.294  | 1.226 | 6.153 | 1.431  |
| ACTR1B                       | 0.483  | 1.398 | 6.252 | 1.996  |
| ACTR3B                       | 0.323  | 1.251 | 5.503 | 0.931  |
| ACTR6                        | 0.315  | 1.244 | 5.569 | 1.576  |
| ACTRT3                       | -0.291 | 0.817 | 3.075 | -1.165 |
| ACVR1B                       | 0.664  | 1.584 | 5.096 | 2.494  |
| ACVR1C                       | 0.322  | 1.250 | 4.310 | 1.071  |
| ACVR2A                       | 0.369  | 1.291 | 4.720 | 1.753  |
| ACVRL1                       | 0.304  | 1.234 | 3.491 | 1.191  |
| ACY3                         | -1.047 | 0.484 | 4.157 | -2.310 |
| ACYP2//LOC101927144          | -0.774 | 0.585 | 5.007 | -2.993 |
| ADAM11                       | 1.181  | 2.268 | 4.601 | 3.128  |
| ADAM12                       | -0.057 | 0.961 | 3.774 | -0.221 |
| ADAM15                       | -0.103 | 0.931 | 4.414 | -0.415 |
| ADAM1A                       | 0.065  | 1.046 | 4.317 | 0.296  |
| ADAM20                       | 0.325  | 1.253 | 3.972 | 1.191  |
| ADAM20P1                     | 0.336  | 1.262 | 4.607 | 1.071  |
| ADAM22                       | 0.493  | 1.407 | 7.233 | 1.974  |
| ADAM23                       | 0.909  | 1.878 | 7.424 | 1.880  |
| ADAM28                       | -0.908 | 0.533 | 6.105 | -2.044 |
| ADAM33                       | 0.017  | 1.012 | 2.990 | 0.055  |
| ADAM8                        | 0.027  | 1.019 | 2.849 | 0.120  |
| ADAMTS1                      | -0.257 | 0.837 | 5.375 | -0.873 |
| ADAMTS12                     | -0.950 | 0.518 | 2.602 | -2.458 |
| ADAMTS14                     | 0.075  | 1.053 | 2.921 | 0.243  |
| ADAMTS15                     | -0.012 | 0.992 | 2.679 | -0.030 |
| ADAMTS16                     | 0.691  | 1.614 | 2.365 | 2.230  |
| ADAMTS17                     | 0.157  | 1.115 | 3.513 | 0.538  |
| ADAMTS18                     | -0.545 | 0.685 | 3.296 | -0.745 |

|                         |        |       |       |        |
|-------------------------|--------|-------|-------|--------|
| ADAMTS19                | 0.299  | 1.230 | 2.726 | 1.154  |
| ADAMTS2                 | 0.234  | 1.176 | 3.432 | 0.706  |
| ADAMTS3                 | 0.955  | 1.938 | 2.648 | 2.668  |
| ADAMTS4                 | -0.683 | 0.623 | 5.767 | -1.516 |
| ADAMTS5                 | -0.215 | 0.862 | 3.436 | -0.921 |
| ADAMTS7P1               | -0.132 | 0.913 | 2.741 | -0.400 |
| ADAMTS8                 | 0.089  | 1.064 | 3.976 | 0.298  |
| ADAMTS9                 | 0.227  | 1.170 | 6.614 | 0.634  |
| ADAMTS9-AS2             | 0.326  | 1.253 | 4.541 | 0.988  |
| ADAMTSL2                | -0.352 | 0.784 | 3.657 | -1.414 |
| ADAMTSL3                | -0.477 | 0.719 | 4.734 | -1.475 |
| ADAMTSL4                | -0.302 | 0.811 | 2.276 | -0.886 |
| ADAMTSL5                | 0.445  | 1.361 | 2.894 | 1.684  |
| ADAP2                   | -0.801 | 0.574 | 5.306 | -2.392 |
| ADARB1                  | 0.392  | 1.312 | 5.324 | 1.515  |
| ADARB2-AS1              | -0.149 | 0.902 | 2.074 | -0.515 |
| ADAT2                   | 0.307  | 1.237 | 3.677 | 1.255  |
| ADCY1                   | 1.341  | 2.533 | 7.038 | 2.530  |
| ADCY10P1                | -1.013 | 0.495 | 4.277 | -3.806 |
| ADCY7                   | -0.567 | 0.675 | 4.582 | -2.031 |
| ADCY8                   | -0.260 | 0.835 | 6.761 | -1.006 |
| ADCY9                   | 0.511  | 1.425 | 5.023 | 1.742  |
| ADCYAP1                 | 0.324  | 1.252 | 3.357 | 0.782  |
| ADCYAP1R1               | 0.074  | 1.052 | 6.506 | 0.252  |
| ADD2                    | 1.060  | 2.084 | 6.151 | 2.360  |
| ADD3-AS1//RP11-451M19.3 | -0.260 | 0.835 | 2.689 | -0.886 |
| ADH1C                   | 0.419  | 1.337 | 2.516 | 0.922  |
| ADIPOR2                 | -0.866 | 0.549 | 5.496 | -3.002 |
| ADIRF                   | 0.024  | 1.017 | 5.323 | 0.105  |
| ADM                     | -0.453 | 0.730 | 5.195 | -1.068 |
| ADNP2                   | 0.088  | 1.063 | 4.140 | 0.335  |
| ADORA2B                 | 1.014  | 2.020 | 4.531 | 3.480  |
| ADORA3                  | -0.718 | 0.608 | 4.862 | -2.101 |
| ADPRHL1                 | 0.762  | 1.696 | 4.183 | 2.357  |
| ADRA1B                  | 0.726  | 1.654 | 3.647 | 2.090  |
| ADRA1D                  | 0.154  | 1.113 | 3.429 | 0.527  |
| ADRA2A                  | -0.062 | 0.958 | 2.901 | -0.193 |
| ADRA2C                  | -0.001 | 1.000 | 2.986 | -0.002 |
| ADRB1                   | 1.013  | 2.018 | 4.636 | 2.484  |
| ADRBK1                  | 0.391  | 1.311 | 6.521 | 1.673  |
| ADRBK2                  | 0.877  | 1.836 | 7.454 | 2.644  |
| ADSSL1                  | -0.497 | 0.708 | 4.219 | -2.282 |
| AEBP1//MIR4649          | -0.244 | 0.844 | 4.316 | -0.848 |
| AEN                     | -0.256 | 0.837 | 3.450 | -1.017 |
| AES                     | 0.365  | 1.288 | 9.069 | 1.457  |
| AF127936.5              | -0.435 | 0.740 | 3.613 | -1.364 |
| AF131215.3              | -0.256 | 0.837 | 3.465 | -0.808 |
| AF131215.4              | -0.153 | 0.899 | 2.746 | -0.523 |
| AFAP1L2                 | 0.339  | 1.265 | 4.278 | 1.163  |
| AFF2                    | 0.520  | 1.434 | 5.749 | 1.019  |

|                                  |        |       |       |        |
|----------------------------------|--------|-------|-------|--------|
| AFF3                             | 0.534  | 1.448 | 5.483 | 2.171  |
| AFMID                            | -0.599 | 0.660 | 4.129 | -2.375 |
| AFTPH                            | 0.348  | 1.273 | 7.175 | 1.758  |
| AGA                              | -0.191 | 0.876 | 5.038 | -0.645 |
| AGAP1-IT1                        | -0.777 | 0.584 | 2.936 | -2.726 |
| AGAP2                            | 1.826  | 3.546 | 5.769 | 3.194  |
| AGAP2-AS1                        | 0.673  | 1.595 | 3.032 | 2.684  |
| AGAP5//AGAP4//AGAP11//AGAP10//LC | -0.244 | 0.845 | 6.087 | -0.840 |
| AGBL3                            | 0.497  | 1.412 | 2.898 | 1.997  |
| AGBL4                            | 1.075  | 2.107 | 3.982 | 2.938  |
| AGBL4-IT1                        | 0.528  | 1.442 | 1.908 | 1.921  |
| AGFG2                            | -0.171 | 0.888 | 5.941 | -0.651 |
| AGGF1                            | 0.210  | 1.156 | 6.930 | 1.187  |
| AGK                              | 0.473  | 1.388 | 5.435 | 2.226  |
| AGL                              | 0.508  | 1.422 | 5.974 | 2.066  |
| AGMAT                            | 0.452  | 1.368 | 3.122 | 1.813  |
| AGMO                             | -0.820 | 0.567 | 2.121 | -2.178 |
| AGPAT4                           | -0.838 | 0.560 | 6.837 | -2.350 |
| AGPAT4-IT1                       | -0.781 | 0.582 | 5.273 | -2.052 |
| AGT                              | -0.397 | 0.760 | 7.225 | -1.419 |
| AGTRAP//BRAF                     | -0.694 | 0.618 | 4.310 | -2.104 |
| AHNAK                            | -0.364 | 0.777 | 7.055 | -1.392 |
| AHNAK2                           | 0.565  | 1.479 | 6.240 | 1.144  |
| AHR                              | -0.223 | 0.857 | 7.045 | -0.788 |
| AHSA2                            | -0.405 | 0.755 | 4.675 | -1.601 |
| AIF1                             | -0.418 | 0.748 | 5.891 | -0.861 |
| AIF1                             | -0.386 | 0.765 | 6.229 | -0.708 |
| AIF1                             | -0.353 | 0.783 | 6.254 | -0.662 |
| AIF1L                            | -0.390 | 0.763 | 3.813 | -1.374 |
| AIFM3                            | 0.257  | 1.195 | 4.974 | 0.922  |
| AIM1                             | 0.552  | 1.466 | 2.344 | 2.002  |
| AJ006998.2                       | 2.165  | 4.484 | 2.176 | 5.135  |
| AJ009632.3                       | 0.963  | 1.949 | 1.839 | 2.887  |
| AJAP1                            | 0.232  | 1.175 | 6.057 | 0.744  |
| AK5                              | 0.535  | 1.448 | 7.739 | 1.701  |
| AKAP11                           | 0.325  | 1.253 | 8.000 | 1.678  |
| AKAP12                           | 0.899  | 1.864 | 5.890 | 2.295  |
| AKAP3                            | -0.522 | 0.696 | 2.506 | -2.009 |
| AKAP5                            | 1.319  | 2.496 | 2.883 | 2.362  |
| AKNA                             | -0.432 | 0.741 | 4.214 | -1.670 |
| AKR1C1                           | -0.029 | 0.980 | 3.029 | -0.099 |
| AKR7A3                           | -0.082 | 0.945 | 3.669 | -0.291 |
| AKR7L                            | 0.313  | 1.243 | 2.477 | 1.196  |
| AKT3                             | 0.476  | 1.391 | 7.672 | 2.196  |
| AKT3-IT1                         | -0.323 | 0.799 | 3.034 | -1.047 |
| AL121578.2                       | 0.429  | 1.346 | 2.257 | 1.224  |
| ALAD                             | -0.474 | 0.720 | 4.924 | -2.239 |
| ALAS1                            | 0.368  | 1.291 | 6.079 | 1.644  |
| ALAS2                            | -0.425 | 0.745 | 3.480 | -0.688 |
| ALCAM                            | -0.644 | 0.640 | 6.368 | -2.275 |

|                               |        |       |       |        |
|-------------------------------|--------|-------|-------|--------|
| ALDH1A1                       | -0.631 | 0.646 | 7.244 | -1.969 |
| ALDH1B1                       | 0.384  | 1.305 | 4.408 | 1.379  |
| ALDH3B1                       | -0.250 | 0.841 | 3.607 | -0.860 |
| ALDH8A1                       | 0.010  | 1.007 | 2.524 | 0.036  |
| ALDH9A1                       | -0.351 | 0.784 | 6.813 | -1.485 |
| ALG1//NAGPA-AS1               | 0.040  | 1.028 | 4.703 | 0.136  |
| ALG10                         | -0.218 | 0.860 | 3.917 | -0.884 |
| ALG10B//ALG10                 | 0.182  | 1.135 | 3.009 | 0.598  |
| ALG1L2                        | -0.015 | 0.989 | 2.467 | -0.041 |
| ALKBH1                        | 0.185  | 1.137 | 4.578 | 0.832  |
| ALMS1-IT1                     | -0.241 | 0.846 | 2.650 | -0.744 |
| ALOX12B                       | 0.775  | 1.712 | 1.994 | 2.275  |
| ALOX12P2                      | 0.482  | 1.397 | 3.150 | 1.979  |
| ALOX15B                       | -0.145 | 0.904 | 3.150 | -0.291 |
| ALOX5                         | -0.309 | 0.807 | 5.041 | -0.732 |
| ALOX5AP                       | -0.276 | 0.826 | 6.867 | -0.586 |
| ALPK1                         | -0.201 | 0.870 | 4.035 | -0.511 |
| ALPL                          | 0.745  | 1.675 | 5.542 | 2.630  |
| ALS2                          | 0.339  | 1.265 | 5.716 | 1.767  |
| ALS2CR11                      | -0.793 | 0.577 | 3.157 | -2.566 |
| ALX4                          | -0.060 | 0.959 | 2.522 | -0.218 |
| AMER1                         | 0.246  | 1.186 | 2.794 | 0.914  |
| AMER2                         | -0.793 | 0.577 | 6.424 | -2.833 |
| AMER3                         | 1.036  | 2.050 | 3.197 | 3.877  |
| AMICA1                        | -0.019 | 0.987 | 2.259 | -0.065 |
| AMIGO1                        | 0.611  | 1.527 | 5.352 | 1.403  |
| AMMECR1                       | 0.125  | 1.090 | 2.432 | 0.460  |
| AMN1                          | 0.271  | 1.207 | 6.142 | 1.405  |
| AMPD3//CAND1.11               | -0.519 | 0.698 | 4.586 | -1.860 |
| AMPH                          | 1.111  | 2.159 | 6.617 | 1.902  |
| AMZ2P1                        | 0.111  | 1.080 | 3.764 | 0.388  |
| ANAPC1//LOC730268//AC083899.3 | 0.294  | 1.226 | 5.203 | 1.446  |
| ANAPC1P1                      | 0.254  | 1.192 | 2.794 | 0.829  |
| ANG//RNASE4                   | -0.119 | 0.921 | 4.262 | -0.423 |
| ANGEL2                        | 0.110  | 1.079 | 5.366 | 0.524  |
| ANGPT1                        | -0.180 | 0.883 | 3.739 | -0.526 |
| ANGPT2                        | -0.599 | 0.660 | 5.994 | -1.393 |
| ANGPTL1                       | 0.172  | 1.126 | 3.059 | 0.582  |
| ANGPTL2                       | -1.004 | 0.499 | 5.161 | -2.953 |
| ANGPTL4                       | 0.127  | 1.092 | 6.286 | 0.288  |
| ANGPTL6                       | -0.065 | 0.956 | 3.520 | -0.213 |
| ANK1                          | 0.289  | 1.222 | 5.017 | 0.607  |
| ANK2                          | 0.208  | 1.155 | 8.932 | 1.157  |
| ANK3                          | 0.213  | 1.159 | 7.720 | 0.991  |
| ANKEF1                        | -0.482 | 0.716 | 2.598 | -1.719 |
| ANKFN1                        | -0.451 | 0.732 | 5.117 | -1.478 |
| ANKFY1                        | -0.533 | 0.691 | 7.185 | -2.752 |
| ANKLE1                        | 0.204  | 1.152 | 2.710 | 0.768  |
| ANKMY2                        | 0.795  | 1.735 | 5.684 | 3.480  |
| ANKRD10-IT1                   | -0.228 | 0.854 | 6.178 | -0.804 |

|                                 |        |       |       |        |
|---------------------------------|--------|-------|-------|--------|
| ANKRD10-IT1                     | -0.002 | 0.999 | 6.002 | -0.006 |
| ANKRD13A                        | -0.429 | 0.743 | 6.146 | -1.630 |
| ANKRD13C                        | 0.330  | 1.257 | 6.641 | 1.677  |
| ANKRD16                         | 0.383  | 1.304 | 5.988 | 1.896  |
| ANKRD18CP//RP11-498P14.5        | 0.635  | 1.553 | 4.256 | 1.613  |
| ANKRD19P                        | 1.025  | 2.035 | 3.840 | 3.353  |
| ANKRD2                          | 0.297  | 1.228 | 3.651 | 1.002  |
| ANKRD20A3//ANKRD20A2//ANKRD20A4 | 0.553  | 1.467 | 6.323 | 1.814  |
| ANKRD20A3//ANKRD20A2//ANKRD20A4 | 0.516  | 1.430 | 6.553 | 1.602  |
| ANKRD20A5P                      | 1.435  | 2.704 | 3.881 | 3.426  |
| ANKRD20A7P                      | 0.342  | 1.267 | 2.484 | 0.508  |
| ANKRD22                         | 0.260  | 1.198 | 2.265 | 0.700  |
| ANKRD24                         | 0.488  | 1.402 | 4.327 | 1.557  |
| ANKRD26                         | 0.246  | 1.186 | 5.397 | 1.132  |
| ANKRD26P3                       | 0.009  | 1.006 | 2.669 | 0.021  |
| ANKRD29                         | 0.561  | 1.475 | 5.289 | 1.233  |
| ANKRD30B                        | 1.105  | 2.152 | 2.850 | 2.293  |
| ANKRD32                         | 0.653  | 1.572 | 4.404 | 2.205  |
| ANKRD33B                        | 0.661  | 1.581 | 3.105 | 1.874  |
| ANKRD34A                        | 0.556  | 1.470 | 3.568 | 1.736  |
| ANKRD34B                        | -0.405 | 0.755 | 2.378 | -1.238 |
| ANKRD34C                        | 0.658  | 1.577 | 3.527 | 1.701  |
| ANKRD36B                        | 0.007  | 1.005 | 6.793 | 0.025  |
| ANKRD37                         | -0.266 | 0.832 | 5.210 | -0.690 |
| ANKRD40                         | -0.715 | 0.609 | 8.442 | -3.163 |
| ANKRD42                         | 0.485  | 1.400 | 4.462 | 1.504  |
| ANKRD44                         | -0.714 | 0.610 | 5.837 | -2.728 |
| ANKRD44-IT1                     | -0.382 | 0.767 | 3.134 | -1.057 |
| ANKRD49                         | 0.293  | 1.225 | 4.405 | 1.220  |
| ANKRD50                         | 0.052  | 1.037 | 5.504 | 0.202  |
| ANKRD55                         | -0.172 | 0.888 | 3.433 | -0.640 |
| ANKS1B                          | 0.715  | 1.642 | 6.124 | 2.451  |
| ANKZF1                          | -0.364 | 0.777 | 4.504 | -1.353 |
| ANLN                            | -1.277 | 0.413 | 8.442 | -3.025 |
| ANO3                            | 1.530  | 2.889 | 4.259 | 2.680  |
| ANO4                            | -0.003 | 0.998 | 5.640 | -0.009 |
| ANO5                            | 0.755  | 1.687 | 6.503 | 2.614  |
| ANO6                            | 0.184  | 1.136 | 8.305 | 0.724  |
| ANP32A-IT1                      | -1.064 | 0.478 | 4.199 | -3.664 |
| ANP32B                          | -0.743 | 0.597 | 4.529 | -3.278 |
| ANPEP                           | 0.064  | 1.045 | 2.316 | 0.169  |
| ANTXR1                          | -0.276 | 0.826 | 6.587 | -1.064 |
| ANTXR2                          | -0.280 | 0.824 | 5.055 | -1.418 |
| ANXA1                           | 0.308  | 1.238 | 5.307 | 0.935  |
| ANXA11                          | 0.436  | 1.353 | 5.057 | 1.576  |
| ANXA13                          | -0.395 | 0.760 | 2.866 | -0.998 |
| ANXA2P2                         | 0.162  | 1.119 | 7.708 | 0.594  |
| ANXA2P3                         | 0.469  | 1.384 | 2.088 | 2.019  |
| ANXA2R                          | -0.332 | 0.795 | 2.369 | -1.270 |
| ANXA3                           | 0.384  | 1.305 | 4.647 | 1.219  |



|                           |        |       |       |        |
|---------------------------|--------|-------|-------|--------|
| ANXA4                     | -0.261 | 0.834 | 6.693 | -0.999 |
| ANXA5                     | -0.668 | 0.629 | 8.208 | -2.528 |
| ANXA6                     | 0.736  | 1.666 | 8.863 | 2.322  |
| AOAH                      | -0.202 | 0.870 | 5.110 | -0.751 |
| AOC3                      | -0.040 | 0.972 | 2.560 | -0.137 |
| AP000282.2                | -0.386 | 0.765 | 2.396 | -0.993 |
| AP000438.2                | 0.221  | 1.165 | 2.309 | 0.954  |
| AP000473.5                | -0.488 | 0.713 | 3.946 | -1.529 |
| AP000640.10               | 0.237  | 1.179 | 2.879 | 0.742  |
| AP000688.29               | -0.564 | 0.676 | 5.158 | -1.398 |
| AP001056.1                | -0.218 | 0.860 | 3.046 | -0.623 |
| AP001347.6                | 0.552  | 1.466 | 2.280 | 1.687  |
| AP001469.7                | -0.191 | 0.876 | 3.250 | -0.659 |
| AP001476.4                | 0.088  | 1.063 | 4.224 | 0.330  |
| AP001631.9                | -0.333 | 0.794 | 3.083 | -1.286 |
| AP002954.3                | -0.567 | 0.675 | 3.715 | -1.237 |
| AP006216.11               | 0.479  | 1.394 | 4.326 | 1.555  |
| AP006222.2                | 0.688  | 1.611 | 5.236 | 2.522  |
| AP006621.6                | -0.107 | 0.928 | 3.993 | -0.340 |
| AP1S1                     | 0.689  | 1.612 | 5.469 | 2.499  |
| AP1S2                     | -0.271 | 0.829 | 5.020 | -0.987 |
| AP1S3                     | 0.473  | 1.388 | 2.260 | 1.766  |
| AP3B2                     | 0.744  | 1.674 | 5.495 | 2.065  |
| AP3M2                     | 0.455  | 1.371 | 5.931 | 1.987  |
| AP4S1                     | 0.222  | 1.166 | 3.202 | 1.050  |
| AP5M1                     | 0.158  | 1.115 | 5.865 | 0.830  |
| APBA1                     | 0.522  | 1.436 | 6.511 | 1.704  |
| APBB1IP                   | -0.992 | 0.503 | 4.668 | -2.386 |
| APCDD1                    | 0.035  | 1.025 | 6.207 | 0.114  |
| API5                      | 0.177  | 1.130 | 6.711 | 0.916  |
| APLN                      | -0.493 | 0.711 | 5.898 | -1.554 |
| APLNR                     | -0.601 | 0.659 | 7.340 | -1.239 |
| APLP1                     | -0.745 | 0.597 | 8.997 | -2.886 |
| APOBEC3C                  | -0.115 | 0.923 | 4.571 | -0.257 |
| APOBEC3D                  | -0.049 | 0.967 | 3.718 | -0.154 |
| APOBEC3G                  | -0.216 | 0.861 | 3.373 | -0.941 |
| APOBR                     | -0.727 | 0.604 | 2.866 | -3.050 |
| APOC1                     | -0.247 | 0.843 | 4.538 | -0.477 |
| APOC4-APOC2//APOC2//APOC4 | -0.555 | 0.681 | 3.621 | -1.866 |
| APOD                      | -0.599 | 0.660 | 8.827 | -2.463 |
| APOE                      | -0.123 | 0.919 | 4.391 | -0.688 |
| APOL2                     | 0.397  | 1.317 | 4.232 | 1.547  |
| APOL4                     | 0.395  | 1.315 | 2.110 | 1.275  |
| APOL6                     | -0.273 | 0.827 | 5.540 | -0.934 |
| APOO                      | 0.260  | 1.198 | 5.535 | 0.869  |
| APPBP2                    | 0.118  | 1.085 | 7.672 | 0.594  |
| APPL2                     | -0.564 | 0.677 | 5.772 | -2.319 |
| APRT                      | -0.126 | 0.917 | 5.233 | -0.505 |
| AQP1//RP5-877J2.1         | -0.904 | 0.534 | 6.920 | -1.393 |
| AQP11                     | -0.008 | 0.994 | 4.699 | -0.035 |

|                        |        |       |       |        |
|------------------------|--------|-------|-------|--------|
| AQP4-AS1               | -0.214 | 0.862 | 4.866 | -0.609 |
| AQP5                   | -0.392 | 0.762 | 2.682 | -1.287 |
| AQP9                   | 0.131  | 1.095 | 3.361 | 0.229  |
| AR                     | -0.556 | 0.680 | 3.621 | -2.268 |
| ARAP1                  | -0.573 | 0.672 | 5.332 | -2.707 |
| ARAP2//LOC101928667    | -0.279 | 0.824 | 6.081 | -1.137 |
| ARC                    | 0.568  | 1.482 | 3.797 | 1.990  |
| ARF3                   | 0.398  | 1.318 | 5.854 | 1.695  |
| ARFGEF2                | 0.481  | 1.396 | 6.998 | 2.527  |
| ARG2                   | 0.373  | 1.295 | 4.734 | 1.071  |
| ARHGAP12               | -0.111 | 0.926 | 7.404 | -0.435 |
| ARHGAP15//LOC101928361 | -0.079 | 0.947 | 2.409 | -0.261 |
| ARHGAP17               | -0.598 | 0.660 | 5.772 | -2.305 |
| ARHGAP18               | 0.248  | 1.187 | 4.715 | 1.013  |
| ARHGAP20               | 0.818  | 1.763 | 4.427 | 1.973  |
| ARHGAP22               | -0.826 | 0.564 | 3.828 | -2.707 |
| ARHGAP22-IT1           | -0.626 | 0.648 | 3.227 | -2.031 |
| ARHGAP23               | -0.762 | 0.590 | 6.547 | -2.525 |
| ARHGAP24               | -0.257 | 0.837 | 4.769 | -0.922 |
| ARHGAP25               | 0.107  | 1.077 | 3.543 | 0.349  |
| ARHGAP26               | 0.521  | 1.435 | 6.903 | 2.497  |
| ARHGAP26-IT1           | 0.324  | 1.251 | 4.575 | 0.844  |
| ARHGAP27               | -0.102 | 0.932 | 3.096 | -0.411 |
| ARHGAP28               | 0.317  | 1.246 | 2.666 | 1.045  |
| ARHGAP30               | -0.124 | 0.917 | 3.204 | -0.409 |
| ARHGAP32               | 0.939  | 1.918 | 7.579 | 3.024  |
| ARHGAP35               | 0.189  | 1.140 | 8.140 | 0.952  |
| ARHGAP36               | -0.752 | 0.594 | 4.599 | -1.210 |
| ARHGAP4                | -0.152 | 0.900 | 4.177 | -0.686 |
| ARHGAP44               | 0.763  | 1.697 | 5.133 | 1.881  |
| ARHGAP6                | -0.069 | 0.953 | 4.249 | -0.294 |
| ARHGDIB                | -0.224 | 0.856 | 3.622 | -0.889 |
| ARHGDIG                | 0.308  | 1.238 | 5.318 | 0.765  |
| ARHGDIG                | -0.094 | 0.937 | 3.201 | -0.331 |
| ARHGEF1//LOC100505585  | -0.459 | 0.727 | 4.991 | -1.647 |
| ARHGEF10               | -0.702 | 0.615 | 6.013 | -3.043 |
| ARHGEF11               | 0.344  | 1.269 | 6.020 | 1.322  |
| ARHGEF12               | 0.494  | 1.408 | 7.885 | 2.323  |
| ARHGEF15               | -0.238 | 0.848 | 3.091 | -0.907 |
| ARHGEF19               | 0.067  | 1.048 | 2.411 | 0.249  |
| ARHGEF25               | 0.874  | 1.832 | 6.050 | 2.286  |
| ARHGEF28               | 0.856  | 1.810 | 4.969 | 2.807  |
| ARHGEF3                | 0.497  | 1.411 | 4.428 | 1.914  |
| ARHGEF33               | 0.317  | 1.245 | 3.605 | 1.220  |
| ARHGEF37               | -0.748 | 0.596 | 5.851 | -2.115 |
| ARHGEF40               | -0.489 | 0.713 | 4.704 | -2.065 |
| ARHGEF5                | -0.752 | 0.594 | 2.332 | -2.822 |
| ARHGEF6                | -0.619 | 0.651 | 7.664 | -2.584 |
| ARHGEF7-IT1            | 0.357  | 1.281 | 2.659 | 1.238  |
| ARHGEF9                | 0.649  | 1.569 | 7.535 | 2.040  |

|                         |        |       |        |        |
|-------------------------|--------|-------|--------|--------|
| ARID5A                  | 0.210  | 1.156 | 5.304  | 0.779  |
| ARID5B                  | 0.427  | 1.345 | 6.475  | 1.543  |
| ARL14EP                 | 0.202  | 1.150 | 6.285  | 0.978  |
| ARL15                   | 0.731  | 1.660 | 5.088  | 3.005  |
| ARL4A                   | 0.898  | 1.864 | 4.079  | 2.333  |
| ARL4C                   | 0.833  | 1.781 | 6.470  | 2.019  |
| ARL4D                   | 0.518  | 1.432 | 2.935  | 1.273  |
| ARL6                    | 0.603  | 1.519 | 4.428  | 1.734  |
| ARL6IP1//RP11-1035H13.3 | 0.327  | 1.254 | 10.236 | 1.692  |
| ARMC3                   | 0.146  | 1.106 | 2.364  | 0.362  |
| ARMC4                   | -0.128 | 0.915 | 1.956  | -0.505 |
| ARMC9                   | 0.609  | 1.526 | 4.566  | 2.117  |
| ARMCX1                  | 0.155  | 1.114 | 5.901  | 0.791  |
| ARNT2                   | 0.366  | 1.289 | 7.892  | 1.538  |
| ARNTL                   | 0.606  | 1.522 | 5.752  | 2.291  |
| ARNTL2                  | 1.052  | 2.073 | 4.095  | 2.587  |
| ARPC1B                  | -0.106 | 0.929 | 5.000  | -0.348 |
| ARPC5L                  | 0.475  | 1.390 | 4.872  | 1.900  |
| ARPP21                  | 1.152  | 2.222 | 4.560  | 2.631  |
| ARRB1                   | 0.149  | 1.109 | 4.934  | 0.614  |
| ARRDC2                  | -0.753 | 0.593 | 5.593  | -2.014 |
| ARRDC3                  | -0.913 | 0.531 | 8.026  | -2.615 |
| ARRDC4                  | -0.795 | 0.576 | 8.005  | -2.142 |
| ARSD                    | -0.191 | 0.876 | 4.357  | -0.610 |
| ARSF                    | -0.677 | 0.625 | 2.300  | -2.141 |
| ARSG                    | 0.013  | 1.009 | 4.979  | 0.048  |
| ARSJ                    | 0.374  | 1.296 | 2.732  | 1.561  |
| ARSK                    | 0.494  | 1.409 | 4.186  | 2.164  |
| ARX                     | 0.943  | 1.923 | 3.535  | 2.367  |
| ASAH1                   | 0.057  | 1.040 | 7.151  | 0.245  |
| ASAP1-IT2               | -0.047 | 0.968 | 3.049  | -0.140 |
| ASAP3                   | 0.021  | 1.015 | 5.618  | 0.107  |
| ASB2                    | 0.529  | 1.443 | 2.115  | 2.031  |
| ASCC2                   | -0.466 | 0.724 | 5.105  | -2.009 |
| ASCL1                   | -0.251 | 0.840 | 6.345  | -0.896 |
| ASGR1                   | 0.257  | 1.195 | 2.924  | 1.030  |
| ASH2L                   | 0.390  | 1.310 | 6.358  | 2.002  |
| ASIC1                   | -0.002 | 0.998 | 4.004  | -0.009 |
| ASIC2                   | 0.891  | 1.854 | 4.540  | 1.850  |
| ASNS                    | 0.498  | 1.413 | 5.361  | 1.986  |
| ASPA                    | -0.670 | 0.628 | 7.176  | -1.456 |
| ASPDH                   | 0.384  | 1.305 | 4.188  | 1.342  |
| ASPHD2                  | 0.552  | 1.466 | 4.480  | 1.518  |
| ASS1                    | 0.642  | 1.561 | 6.266  | 1.958  |
| ASTN1                   | 0.491  | 1.405 | 7.270  | 1.795  |
| ASUN                    | -0.463 | 0.726 | 5.538  | -1.753 |
| ASXL3                   | 0.249  | 1.188 | 4.707  | 1.098  |
| ATAD2                   | 0.574  | 1.489 | 4.077  | 2.585  |
| ATCAY                   | 0.872  | 1.831 | 7.165  | 1.982  |
| ATE1-AS1//RP11-500G22.2 | -0.907 | 0.533 | 4.337  | -2.160 |

|                            |        |       |        |        |
|----------------------------|--------|-------|--------|--------|
| ATF3                       | -0.478 | 0.718 | 4.158  | -1.252 |
| ATF5                       | -0.071 | 0.952 | 4.074  | -0.278 |
| ATF7//NPFF//RP11-793H13.10 | -0.662 | 0.632 | 6.106  | -2.587 |
| ATF7IP2                    | 0.313  | 1.242 | 2.849  | 1.179  |
| ATG13                      | -0.237 | 0.848 | 5.856  | -1.119 |
| ATG16L1                    | 0.225  | 1.169 | 5.412  | 0.826  |
| ATG2B                      | 0.143  | 1.104 | 6.561  | 0.734  |
| ATG4C                      | -0.583 | 0.668 | 6.307  | -2.255 |
| ATG5                       | 0.542  | 1.456 | 5.901  | 2.541  |
| ATHL1                      | 0.165  | 1.121 | 3.507  | 0.664  |
| ATL1                       | 0.399  | 1.319 | 5.985  | 1.636  |
| ATL2                       | 0.619  | 1.536 | 4.354  | 2.347  |
| ATL3                       | -0.324 | 0.799 | 6.874  | -1.312 |
| ATM//NPAT                  | -0.539 | 0.688 | 6.375  | -2.108 |
| ATMIN                      | 0.340  | 1.266 | 7.928  | 1.754  |
| ATOH8                      | -0.372 | 0.773 | 2.616  | -1.093 |
| ATP10B                     | -1.054 | 0.482 | 6.061  | -2.126 |
| ATP11A                     | -0.797 | 0.576 | 6.583  | -2.770 |
| ATP11C                     | -0.475 | 0.719 | 5.165  | -2.038 |
| ATP13A2                    | 0.486  | 1.401 | 7.485  | 1.877  |
| ATP13A4                    | -0.443 | 0.736 | 5.997  | -1.430 |
| ATP13A5-AS1                | 0.417  | 1.335 | 2.007  | 1.853  |
| ATP1A1                     | 0.606  | 1.522 | 5.125  | 3.016  |
| ATP1A1-AS1                 | -0.396 | 0.760 | 4.015  | -1.512 |
| ATP1A3//LOC101927137       | 0.590  | 1.505 | 4.602  | 1.224  |
| ATP1B1                     | 0.163  | 1.120 | 9.698  | 0.839  |
| ATP2A2                     | 0.227  | 1.171 | 8.517  | 1.125  |
| ATP2A3                     | -0.101 | 0.932 | 2.600  | -0.378 |
| ATP2B1                     | 1.368  | 2.581 | 7.614  | 3.189  |
| ATP2B2                     | 1.325  | 2.505 | 6.237  | 2.551  |
| ATP2B3                     | 1.203  | 2.302 | 4.108  | 2.008  |
| ATP2B4                     | 0.471  | 1.386 | 7.781  | 2.042  |
| ATP2C2                     | 0.269  | 1.205 | 2.218  | 0.973  |
| ATP4B                      | -0.254 | 0.839 | 2.060  | -0.824 |
| ATP5A1                     | 0.434  | 1.351 | 8.595  | 2.181  |
| ATP5B                      | 0.401  | 1.320 | 10.183 | 1.927  |
| ATP5SL                     | 0.073  | 1.052 | 5.123  | 0.343  |
| ATP5SL                     | 0.093  | 1.067 | 3.648  | 0.295  |
| ATP6V0A1                   | 0.270  | 1.206 | 8.753  | 1.290  |
| ATP6V0C                    | 0.258  | 1.196 | 9.554  | 1.279  |
| ATP6V0E1                   | -0.259 | 0.836 | 9.537  | -1.152 |
| ATP6V1A                    | 0.727  | 1.655 | 7.578  | 2.308  |
| ATP6V1B2                   | 0.550  | 1.464 | 8.519  | 2.152  |
| ATP6V1C1                   | 0.771  | 1.707 | 8.078  | 2.777  |
| ATP6V1D                    | 0.507  | 1.421 | 5.437  | 2.605  |
| ATP6V1H                    | 0.777  | 1.714 | 6.969  | 2.784  |
| ATP7B                      | 0.259  | 1.196 | 3.880  | 0.890  |
| ATP8A1                     | -0.120 | 0.920 | 8.915  | -0.532 |
| ATP8A2                     | 0.854  | 1.807 | 6.622  | 1.525  |
| ATP8B1                     | 0.649  | 1.568 | 4.107  | 1.877  |

|                         |        |       |       |        |
|-------------------------|--------|-------|-------|--------|
| ATP8B4                  | -0.397 | 0.760 | 4.403 | -1.317 |
| ATPAF1                  | 0.167  | 1.123 | 6.522 | 0.905  |
| ATR                     | 0.190  | 1.141 | 5.225 | 0.925  |
| ATRN                    | 0.141  | 1.103 | 6.979 | 0.722  |
| ATRNL1                  | 1.478  | 2.785 | 7.799 | 2.865  |
| ATXN3//RP11-529H20.6    | -0.130 | 0.914 | 3.301 | -0.426 |
| ATXN7L3                 | 0.668  | 1.589 | 6.897 | 2.158  |
| ATXN7L3B                | 0.363  | 1.286 | 8.034 | 1.614  |
| AURKB                   | -0.177 | 0.885 | 2.474 | -0.608 |
| AVIL//PP12719           | -0.370 | 0.774 | 3.073 | -1.248 |
| AVL9                    | 0.448  | 1.364 | 6.726 | 2.162  |
| AVPI1                   | 0.219  | 1.164 | 5.751 | 0.744  |
| AZGP1                   | -0.345 | 0.787 | 2.905 | -0.938 |
| B2M                     | 0.201  | 1.149 | 8.007 | 0.871  |
| B3GALNT1                | 0.057  | 1.040 | 4.270 | 0.232  |
| B3GALT1                 | 1.148  | 2.216 | 4.751 | 2.525  |
| B3GALT2                 | 0.846  | 1.798 | 6.864 | 2.775  |
| B3GAT2                  | -0.554 | 0.681 | 6.700 | -1.675 |
| B3GNT1                  | 0.683  | 1.605 | 6.556 | 2.569  |
| B3GNT4                  | 0.561  | 1.475 | 2.366 | 1.717  |
| B3GNT9                  | -0.482 | 0.716 | 4.700 | -1.852 |
| B4GALNT1                | 1.175  | 2.258 | 5.123 | 2.455  |
| B4GALNT3                | 0.387  | 1.308 | 2.462 | 1.466  |
| B4GALT1                 | -0.123 | 0.919 | 4.596 | -0.488 |
| B4GALT5                 | 0.469  | 1.384 | 7.421 | 2.228  |
| B4GALT6                 | 1.103  | 2.148 | 5.965 | 2.078  |
| B9D2                    | -0.132 | 0.912 | 3.724 | -0.484 |
| BAALC-AS1//RP11-318M2.2 | 0.849  | 1.801 | 3.012 | 2.448  |
| BAALCOS//C8orf56        | 0.331  | 1.258 | 3.186 | 1.193  |
| BAAT                    | 0.447  | 1.363 | 2.298 | 1.833  |
| BACE1                   | -0.730 | 0.603 | 7.894 | -2.437 |
| BACE2                   | -0.385 | 0.766 | 4.239 | -1.368 |
| BACE2-IT1               | -0.279 | 0.824 | 3.281 | -0.950 |
| BACH1-IT3               | -0.421 | 0.747 | 2.358 | -1.550 |
| BAG2                    | -0.158 | 0.896 | 4.615 | -0.600 |
| BAG3                    | -0.176 | 0.885 | 6.218 | -0.505 |
| BAG4                    | 0.655  | 1.574 | 4.957 | 2.667  |
| BAI1                    | 0.723  | 1.650 | 4.987 | 1.938  |
| BAI2                    | 0.552  | 1.466 | 5.225 | 1.865  |
| BAI3                    | 0.688  | 1.611 | 7.389 | 2.299  |
| BAIAP2                  | 0.767  | 1.701 | 5.026 | 2.183  |
| BAIAP2-AS1              | 0.411  | 1.329 | 4.227 | 1.513  |
| BAIAP2L2                | 0.049  | 1.034 | 3.296 | 0.178  |
| BAIAP3                  | 0.630  | 1.548 | 5.710 | 1.641  |
| BAMBI                   | -0.874 | 0.546 | 5.988 | -2.808 |
| BAP1                    | 0.715  | 1.641 | 6.205 | 2.650  |
| BARD1                   | -0.211 | 0.864 | 4.529 | -0.840 |
| BARX2                   | 0.206  | 1.153 | 1.937 | 0.841  |
| BASP1                   | 1.245  | 2.370 | 8.665 | 2.649  |
| BATF3                   | 0.070  | 1.050 | 3.318 | 0.249  |

|                   |        |       |       |        |
|-------------------|--------|-------|-------|--------|
| BAX               | -0.243 | 0.845 | 4.188 | -0.947 |
| BAZ1A             | -0.421 | 0.747 | 4.916 | -1.587 |
| BAZ2B             | -0.563 | 0.677 | 7.629 | -2.399 |
| BBOX1             | -0.358 | 0.780 | 4.146 | -1.387 |
| BBS10             | -0.049 | 0.966 | 5.264 | -0.178 |
| BBS7              | 0.599  | 1.515 | 6.834 | 2.631  |
| BBX               | -0.676 | 0.626 | 5.819 | -2.894 |
| BCAN              | -0.403 | 0.756 | 6.658 | -1.510 |
| BCAR3             | 0.055  | 1.039 | 4.225 | 0.233  |
| BCAS1             | -0.960 | 0.514 | 6.748 | -3.288 |
| BCAS4             | 0.371  | 1.293 | 4.202 | 1.474  |
| BCAT1             | 0.235  | 1.177 | 5.739 | 0.853  |
| BCDIN3D-AS1       | 0.589  | 1.504 | 2.731 | 2.607  |
| BCHE              | -0.371 | 0.773 | 3.069 | -1.364 |
| BCL11A            | 1.405  | 2.648 | 4.255 | 2.853  |
| BCL11B            | 1.469  | 2.769 | 3.522 | 3.281  |
| BCL2              | -0.467 | 0.724 | 6.521 | -2.055 |
| BCL2A1            | 0.352  | 1.276 | 3.559 | 0.812  |
| BCL3//MIR8085     | 0.121  | 1.088 | 4.179 | 0.489  |
| BCL6              | 0.028  | 1.020 | 8.153 | 0.098  |
| BCL6B             | -0.534 | 0.691 | 2.660 | -1.673 |
| BCL7A             | 0.389  | 1.310 | 5.532 | 1.533  |
| BCL7C             | -0.431 | 0.742 | 4.179 | -1.798 |
| BCMO1             | 0.746  | 1.677 | 2.451 | 2.201  |
| BCO2              | -0.249 | 0.841 | 5.061 | -0.911 |
| BCS1L             | 0.066  | 1.047 | 4.242 | 0.253  |
| BDH1              | 0.349  | 1.274 | 4.398 | 1.624  |
| BDH2              | -0.458 | 0.728 | 4.338 | -1.807 |
| BDNF-AS//BDNF-AS1 | -0.399 | 0.758 | 3.652 | -1.468 |
| BEAN1             | 0.365  | 1.288 | 3.345 | 1.442  |
| BEGAIN            | 0.534  | 1.448 | 2.487 | 1.576  |
| BEND4             | 0.580  | 1.495 | 2.549 | 2.061  |
| BEND5             | 0.316  | 1.245 | 4.256 | 1.123  |
| BEND6             | 0.602  | 1.518 | 5.969 | 1.779  |
| BEST1             | -0.601 | 0.659 | 7.087 | -1.234 |
| BEST3             | 0.238  | 1.179 | 3.337 | 0.583  |
| BEX1              | 0.850  | 1.802 | 8.278 | 2.009  |
| BEX2              | 0.260  | 1.198 | 4.609 | 0.913  |
| BEX5              | 0.782  | 1.719 | 4.728 | 2.287  |
| BGN               | 0.511  | 1.426 | 6.883 | 1.661  |
| BHLHA15           | -0.098 | 0.934 | 3.335 | -0.318 |
| BHLHB9            | 0.325  | 1.253 | 5.592 | 1.177  |
| BHLHE22           | 0.240  | 1.181 | 2.614 | 0.917  |
| BHLHE23           | -0.148 | 0.903 | 3.424 | -0.693 |
| BHLHE40           | 0.505  | 1.419 | 7.525 | 2.027  |
| BHLHE41           | -0.574 | 0.672 | 8.257 | -2.452 |
| BHMT2             | 0.266  | 1.203 | 3.378 | 1.159  |
| BICC1             | 0.616  | 1.532 | 4.500 | 1.923  |
| BIN2              | -0.541 | 0.687 | 5.061 | -1.736 |
| BIRC3             | -0.188 | 0.878 | 3.684 | -0.550 |

|                              |        |       |       |        |
|------------------------------|--------|-------|-------|--------|
| BIRC7                        | 0.098  | 1.071 | 2.907 | 0.378  |
| BLID                         | -0.743 | 0.597 | 3.195 | -1.735 |
| BLNK                         | -0.848 | 0.556 | 4.295 | -1.772 |
| BMP2                         | 0.267  | 1.203 | 4.550 | 1.105  |
| BMP2K                        | -0.083 | 0.944 | 7.423 | -0.352 |
| BMP3                         | 0.347  | 1.271 | 3.259 | 1.094  |
| BMP4                         | 0.228  | 1.171 | 3.695 | 0.574  |
| BMP5                         | 0.808  | 1.750 | 2.391 | 1.266  |
| BMP6                         | 0.545  | 1.459 | 4.246 | 1.409  |
| BMP7                         | -0.520 | 0.697 | 4.572 | -1.683 |
| BMP8A                        | -0.386 | 0.765 | 5.005 | -1.687 |
| BMP8B                        | -0.934 | 0.523 | 3.039 | -2.822 |
| BMPER                        | 0.767  | 1.702 | 4.588 | 2.705  |
| BMPR2                        | 0.466  | 1.381 | 8.766 | 2.349  |
| BMS1//LOC101929959           | 0.219  | 1.164 | 5.999 | 1.037  |
| BMS1P20//LL22NC03-80A10.12   | 0.420  | 1.338 | 3.620 | 1.273  |
| BMS1P4//BMS1//RP11-574K11.28 | -0.183 | 0.881 | 3.015 | -0.484 |
| BNC2                         | -0.376 | 0.771 | 3.455 | -1.244 |
| BOC                          | -0.512 | 0.701 | 4.358 | -2.076 |
| BOK                          | -1.468 | 0.361 | 6.769 | -3.636 |
| BOLA3-AS1                    | 0.244  | 1.184 | 4.014 | 0.887  |
| BRAF//KIAA1549               | 0.352  | 1.276 | 7.012 | 1.816  |
| BRCC3                        | 0.099  | 1.071 | 6.446 | 0.505  |
| BRI3                         | 0.431  | 1.348 | 2.880 | 1.578  |
| BRI3                         | -0.089 | 0.940 | 2.387 | -0.453 |
| BRINP1//DBC1                 | 0.535  | 1.449 | 7.358 | 1.616  |
| BRINP2//FAM5B                | 0.998  | 1.997 | 5.627 | 2.571  |
| BRINP3//FAM5C                | 0.253  | 1.192 | 6.373 | 0.881  |
| BRMS1L                       | 0.302  | 1.233 | 4.297 | 1.360  |
| BRPF3                        | 0.002  | 1.002 | 4.857 | 0.011  |
| BRSK1                        | 0.247  | 1.187 | 6.616 | 0.982  |
| BRSK2                        | 0.297  | 1.229 | 5.625 | 1.338  |
| BSN                          | 1.220  | 2.330 | 5.422 | 2.342  |
| BSPRY                        | 0.515  | 1.429 | 2.918 | 1.793  |
| BST1                         | -0.161 | 0.894 | 2.977 | -0.598 |
| BST2                         | 0.204  | 1.152 | 5.725 | 0.730  |
| BTBD10                       | 0.493  | 1.407 | 5.701 | 2.145  |
| BTBD11                       | 0.288  | 1.221 | 4.476 | 0.890  |
| BTBD16                       | -0.272 | 0.828 | 2.431 | -1.038 |
| BTBD17                       | -0.134 | 0.911 | 2.766 | -0.480 |
| BTBD19//PLK3                 | -0.331 | 0.795 | 3.155 | -0.973 |
| BTBD3                        | -0.387 | 0.765 | 6.467 | -1.718 |
| BTBD6                        | 0.663  | 1.583 | 4.763 | 2.662  |
| BTBD8                        | -0.344 | 0.788 | 4.901 | -1.173 |
| BTBD9                        | 0.527  | 1.440 | 5.913 | 2.064  |
| BTG2                         | -0.030 | 0.979 | 7.920 | -0.108 |
| BTG3                         | -0.259 | 0.836 | 3.726 | -0.930 |
| BTK                          | -0.557 | 0.680 | 4.408 | -1.552 |
| BTRC                         | 0.334  | 1.260 | 7.369 | 1.708  |
| BVES                         | -1.156 | 0.449 | 6.506 | -3.124 |

|                               |        |       |       |        |
|-------------------------------|--------|-------|-------|--------|
| BVES-AS1                      | -0.890 | 0.540 | 2.735 | -2.559 |
| BZRAP1                        | 0.866  | 1.822 | 4.576 | 2.364  |
| BZW2                          | 0.950  | 1.932 | 3.927 | 3.224  |
| C10orf10                      | 0.832  | 1.781 | 6.564 | 1.745  |
| C10orf105                     | -1.492 | 0.356 | 2.943 | -2.975 |
| C10orf107                     | -0.089 | 0.940 | 5.145 | -0.308 |
| C10orf11                      | -0.591 | 0.664 | 2.939 | -2.106 |
| C10orf128                     | -1.001 | 0.500 | 4.017 | -2.261 |
| C10orf25                      | -0.083 | 0.944 | 3.233 | -0.313 |
| C10orf35                      | 0.928  | 1.903 | 2.054 | 3.149  |
| C10orf54                      | -0.540 | 0.688 | 4.029 | -1.652 |
| C10orf85                      | -0.667 | 0.630 | 4.139 | -2.292 |
| C10orf88                      | 0.200  | 1.149 | 5.328 | 0.772  |
| C10orf90                      | -0.931 | 0.524 | 4.686 | -2.273 |
| C11orf24                      | -0.609 | 0.656 | 5.106 | -2.436 |
| C11orf39                      | -0.621 | 0.650 | 3.344 | -1.929 |
| C11orf39                      | -0.708 | 0.612 | 3.364 | -1.650 |
| C11orf70                      | -0.001 | 0.999 | 3.245 | -0.004 |
| C11orf74                      | 0.647  | 1.566 | 3.763 | 2.676  |
| C11orf80                      | 0.382  | 1.303 | 4.172 | 1.568  |
| C11orf87                      | 2.178  | 4.526 | 4.632 | 2.611  |
| C11orf88                      | -0.266 | 0.832 | 1.741 | -0.587 |
| C11orf91                      | 0.701  | 1.626 | 2.728 | 2.337  |
| C11orf97//RP11-867G2.2        | 0.613  | 1.529 | 2.031 | 1.589  |
| C12orf29                      | 0.413  | 1.331 | 6.209 | 2.258  |
| C12orf4                       | 0.171  | 1.126 | 6.003 | 0.714  |
| C12orf43                      | 0.495  | 1.409 | 4.883 | 2.426  |
| C12orf45                      | 0.189  | 1.140 | 4.062 | 0.810  |
| C12orf55                      | -0.148 | 0.903 | 2.977 | -0.404 |
| C12orf76                      | -0.779 | 0.583 | 4.246 | -3.203 |
| C14orf132                     | 0.282  | 1.216 | 6.222 | 0.972  |
| C14orf142                     | 0.404  | 1.323 | 2.980 | 1.566  |
| C14orf2                       | 0.488  | 1.402 | 4.005 | 2.130  |
| C14orf23                      | 1.492  | 2.812 | 2.568 | 3.288  |
| C14orf37                      | 0.351  | 1.275 | 5.326 | 1.120  |
| C15orf27                      | 0.626  | 1.544 | 2.810 | 1.598  |
| C15orf39                      | 0.219  | 1.164 | 3.916 | 0.948  |
| C15orf52                      | -0.312 | 0.806 | 3.751 | -1.392 |
| C15orf59                      | 0.107  | 1.077 | 6.031 | 0.362  |
| C15orf61                      | 0.454  | 1.370 | 4.577 | 1.567  |
| C15orf65                      | -0.033 | 0.977 | 4.722 | -0.117 |
| C16orf13                      | 0.219  | 1.164 | 5.806 | 1.046  |
| C16orf45                      | 0.355  | 1.279 | 6.956 | 1.627  |
| C16orf52//VWA3A//LOC101930115 | 0.532  | 1.446 | 4.961 | 2.380  |
| C16orf70                      | -0.003 | 0.998 | 7.285 | -0.012 |
| C16orf87                      | 0.548  | 1.462 | 5.483 | 1.921  |
| C16orf89                      | -0.066 | 0.955 | 4.565 | -0.257 |
| C16orf93                      | 0.386  | 1.306 | 3.127 | 1.620  |
| C17orf100                     | 0.232  | 1.175 | 4.534 | 0.945  |
| C17orf107                     | 0.185  | 1.137 | 3.170 | 0.600  |



|                       |        |       |       |        |
|-----------------------|--------|-------|-------|--------|
| C17orf50              | 0.194  | 1.144 | 2.751 | 0.813  |
| C17orf51              | 0.622  | 1.539 | 4.460 | 2.006  |
| C17orf58              | 0.358  | 1.281 | 3.340 | 1.367  |
| C17orf62              | -0.135 | 0.911 | 6.266 | -0.517 |
| C17orf75              | 0.378  | 1.299 | 5.349 | 1.545  |
| C17orf96              | 0.640  | 1.558 | 2.722 | 1.896  |
| C17orf97              | -0.150 | 0.901 | 4.718 | -0.548 |
| C18orf21              | 0.252  | 1.191 | 3.411 | 1.094  |
| C18orf25              | 0.415  | 1.333 | 5.983 | 1.965  |
| C18orf42              | -0.119 | 0.921 | 2.703 | -0.336 |
| C18orf54              | -0.420 | 0.747 | 4.303 | -1.372 |
| C19orf12              | 0.439  | 1.356 | 4.055 | 2.070  |
| C19orf18              | 0.027  | 1.019 | 3.450 | 0.086  |
| C19orf26              | 0.184  | 1.136 | 3.706 | 0.689  |
| C19orf33//CTB-102L5.4 | 0.123  | 1.089 | 2.379 | 0.374  |
| C19orf35              | -0.204 | 0.868 | 2.961 | -0.830 |
| C19orf38              | -0.771 | 0.586 | 4.418 | -1.885 |
| C19orf54              | -0.407 | 0.754 | 3.776 | -1.292 |
| C19orf57              | -0.318 | 0.802 | 2.847 | -1.172 |
| C19orf81              | 0.302  | 1.233 | 2.351 | 1.023  |
| C19orf82              | -0.405 | 0.755 | 4.103 | -1.546 |
| C19orf83//AC006132.1  | -0.067 | 0.955 | 2.722 | -0.256 |
| C1GALT1               | -0.345 | 0.787 | 6.293 | -1.213 |
| C1orf110              | 0.005  | 1.004 | 2.879 | 0.016  |
| C1orf115              | 2.059  | 4.168 | 5.240 | 3.334  |
| C1orf158              | -0.430 | 0.742 | 1.816 | -0.987 |
| C1orf162              | -0.279 | 0.824 | 5.579 | -0.581 |
| C1orf192              | -0.005 | 0.996 | 4.436 | -0.010 |
| C1orf194              | 0.103  | 1.074 | 3.180 | 0.345  |
| C1orf198              | -0.628 | 0.647 | 5.994 | -2.103 |
| C1orf21               | 0.498  | 1.412 | 5.816 | 1.870  |
| C1orf216              | 0.483  | 1.397 | 3.563 | 1.794  |
| C1orf220              | 0.129  | 1.094 | 2.522 | 0.467  |
| C1orf226//NOS1AP      | -0.553 | 0.682 | 2.904 | -2.252 |
| C1orf228              | -0.037 | 0.974 | 3.285 | -0.133 |
| C1orf233              | 0.305  | 1.235 | 4.361 | 0.931  |
| C1orf54               | -0.409 | 0.753 | 4.495 | -1.813 |
| C1orf61               | -0.552 | 0.682 | 5.606 | -1.805 |
| C1orf64               | 0.434  | 1.351 | 3.861 | 1.508  |
| C1orf74               | 0.005  | 1.003 | 3.876 | 0.022  |
| C1orf87               | -0.354 | 0.783 | 2.383 | -0.693 |
| C1orf94               | -0.112 | 0.925 | 2.575 | -0.417 |
| C1orf95               | 0.213  | 1.159 | 3.945 | 0.818  |
| C1QA                  | -0.558 | 0.679 | 3.526 | -1.306 |
| C1QB                  | -0.320 | 0.801 | 6.710 | -0.636 |
| C1QC                  | -0.288 | 0.819 | 7.174 | -0.623 |
| C1QL1                 | -0.415 | 0.750 | 3.998 | -1.191 |
| C1QL2                 | 0.146  | 1.107 | 4.540 | 0.419  |
| C1QL3                 | 2.132  | 4.382 | 5.352 | 2.621  |
| C1QL4                 | -0.235 | 0.850 | 2.194 | -0.728 |

|                                    |        |       |       |        |
|------------------------------------|--------|-------|-------|--------|
| C1QTNF4                            | 0.880  | 1.840 | 5.101 | 1.942  |
| C1QTNF6                            | -0.155 | 0.898 | 3.533 | -0.522 |
| C1QTNF8                            | 0.065  | 1.046 | 2.445 | 0.252  |
| C1R//C1RL                          | 0.438  | 1.355 | 4.399 | 1.359  |
| C1RL                               | 0.214  | 1.160 | 4.122 | 0.756  |
| C1S                                | 0.393  | 1.313 | 5.773 | 1.312  |
| C2//CFB//XXbac-BPG116M5.17         | -0.109 | 0.927 | 3.719 | -0.385 |
| C2//CFB//XXbac-BPG116M5.17         | -0.103 | 0.931 | 3.825 | -0.357 |
| C2//CFB//XXbac-BPG116M5.17         | -0.096 | 0.935 | 3.789 | -0.345 |
| C2//CFB//XXbac-BPG116M5.17         | -0.086 | 0.942 | 3.828 | -0.312 |
| C2//XXbac-BPG116M5.17              | 0.075  | 1.053 | 3.770 | 0.228  |
| C2orf197                           | -0.287 | 0.820 | 3.436 | -1.139 |
| C2orf26                            | 0.052  | 1.037 | 2.758 | 0.200  |
| C21orf128                          | 0.832  | 1.780 | 3.163 | 2.073  |
| C21orf140//AP000322.54             | -0.153 | 0.900 | 2.187 | -0.640 |
| C21orf15//LINC00417//CYP4F29P      | -0.095 | 0.936 | 3.433 | -0.288 |
| C21orf37                           | -1.275 | 0.413 | 4.392 | -1.769 |
| C21orf49                           | -0.197 | 0.872 | 2.924 | -0.691 |
| C21orf62                           | -0.654 | 0.635 | 3.993 | -2.019 |
| C21orf88                           | -0.660 | 0.633 | 3.836 | -2.972 |
| C21orf91                           | -1.035 | 0.488 | 4.614 | -2.560 |
| C22orf24                           | 0.734  | 1.663 | 2.390 | 1.775  |
| C22orf39//HIRA                     | -0.236 | 0.849 | 4.821 | -0.869 |
| C22orf46                           | -0.488 | 0.713 | 3.820 | -1.864 |
| C2CD2                              | -0.522 | 0.696 | 3.194 | -1.581 |
| C2CD2                              | -0.297 | 0.814 | 6.825 | -1.511 |
| C2CD4C                             | 0.116  | 1.084 | 3.343 | 0.470  |
| C2CD5                              | 0.305  | 1.236 | 6.657 | 1.515  |
| C2orf15//MRPL30//LOC101927110//RP: | 0.650  | 1.569 | 3.037 | 2.167  |
| C2orf40                            | -0.106 | 0.929 | 3.342 | -0.427 |
| C2orf50                            | 0.436  | 1.353 | 3.203 | 1.384  |
| C2orf68                            | -0.672 | 0.628 | 5.684 | -2.265 |
| C2orf69                            | 0.253  | 1.192 | 4.975 | 1.230  |
| C2orf72                            | 0.109  | 1.079 | 5.520 | 0.445  |
| C2orf80                            | 1.311  | 2.481 | 4.203 | 2.300  |
| C2orf82                            | -0.428 | 0.743 | 3.901 | -1.321 |
| C2orf88                            | -0.472 | 0.721 | 3.117 | -1.895 |
| C3                                 | -0.972 | 0.510 | 8.694 | -2.210 |
| C3AR1                              | -0.263 | 0.834 | 3.750 | -0.802 |
| C3orf14                            | 0.413  | 1.331 | 5.037 | 1.706  |
| C3orf17                            | 0.032  | 1.023 | 5.372 | 0.133  |
| C3orf33                            | 0.666  | 1.587 | 2.255 | 3.216  |
| C3orf35                            | -0.060 | 0.959 | 3.694 | -0.227 |
| C3orf58                            | -0.320 | 0.801 | 4.328 | -1.340 |
| C3orf67-AS1//RP11-147N17.1         | 0.428  | 1.345 | 2.456 | 1.651  |
| C3orf80//RP11-431I8.1              | 2.268  | 4.816 | 3.489 | 3.178  |
| C4A//C4B//C4B_2                    | -0.409 | 0.753 | 7.186 | -0.957 |
| C4B//C4A//C4B_2                    | -0.414 | 0.751 | 7.480 | -0.946 |
| C4B//C4B_2//C4A                    | -0.507 | 0.704 | 7.356 | -1.177 |
| C4B//C4B_2//C4A                    | -0.493 | 0.711 | 7.464 | -1.126 |

|                                    |        |       |       |        |
|------------------------------------|--------|-------|-------|--------|
| C4B//C4B_2//C4A                    | -0.490 | 0.712 | 7.482 | -1.104 |
| C4B//C4B_2//C4A                    | -0.483 | 0.716 | 7.483 | -1.077 |
| C4B//C4B_2//C4A                    | -0.411 | 0.752 | 7.513 | -0.945 |
| C4B//C4B_2//C4A//STK19//DAQB-33111 | -0.367 | 0.775 | 6.703 | -0.940 |
| C4B//C4B_2//C4A//STK19//DAQB-33111 | -0.340 | 0.790 | 6.810 | -0.847 |
| C4orf19                            | 0.662  | 1.582 | 2.325 | 2.434  |
| C4orf32                            | -0.632 | 0.645 | 3.891 | -2.473 |
| C4orf47                            | -0.477 | 0.719 | 2.827 | -1.584 |
| C4orf50                            | 0.632  | 1.550 | 3.004 | 1.596  |
| C5                                 | -0.407 | 0.754 | 3.986 | -1.346 |
| C5AR1                              | 0.260  | 1.197 | 4.639 | 0.403  |
| C5AR2//GPR77                       | 0.130  | 1.095 | 2.983 | 0.329  |
| C5orf22                            | 0.360  | 1.283 | 5.808 | 1.622  |
| C5orf27                            | 0.069  | 1.049 | 4.425 | 0.118  |
| C5orf30                            | 0.076  | 1.054 | 4.711 | 0.276  |
| C5orf34                            | 1.027  | 2.037 | 2.123 | 4.512  |
| C5orf38                            | -0.799 | 0.575 | 3.137 | -3.345 |
| C5orf49                            | 0.402  | 1.321 | 4.456 | 0.973  |
| C5orf55                            | 0.055  | 1.039 | 3.453 | 0.198  |
| C5orf63                            | -0.261 | 0.835 | 3.182 | -0.999 |
| C5orf64                            | -0.713 | 0.610 | 3.812 | -1.424 |
| C6orf106                           | 0.314  | 1.243 | 6.704 | 1.470  |
| C6orf120                           | 0.333  | 1.260 | 5.692 | 1.541  |
| C6orf165//RP3-382110.7             | 0.927  | 1.901 | 5.110 | 2.379  |
| C6orf165//RP3-382110.7             | 0.494  | 1.408 | 3.064 | 1.310  |
| C6orf211                           | 0.210  | 1.157 | 4.895 | 0.831  |
| C6orf47                            | 0.393  | 1.313 | 2.573 | 1.224  |
| C6orf48                            | -0.380 | 0.768 | 8.647 | -1.707 |
| C6orf48                            | -0.392 | 0.762 | 7.128 | -1.698 |
| C6orf48                            | -0.387 | 0.765 | 7.564 | -1.653 |
| C6orf48                            | -0.327 | 0.797 | 7.250 | -1.653 |
| C6orf48                            | -0.390 | 0.763 | 7.378 | -1.595 |
| C6orf48                            | -0.276 | 0.826 | 7.238 | -1.406 |
| C6orf57                            | 0.353  | 1.277 | 3.919 | 1.379  |
| C6orf62                            | 0.173  | 1.128 | 4.644 | 0.545  |
| C7                                 | 0.918  | 1.890 | 5.134 | 2.422  |
| C7orf34                            | -0.308 | 0.808 | 2.613 | -1.100 |
| C7orf57                            | -0.169 | 0.890 | 1.764 | -0.515 |
| C7orf60                            | 0.477  | 1.392 | 5.462 | 1.814  |
| C7orf61//TSC22D4                   | -0.379 | 0.769 | 3.479 | -1.237 |
| C7orf63                            | 0.534  | 1.448 | 3.254 | 2.009  |
| C7orf65                            | 0.104  | 1.074 | 2.969 | 0.417  |
| C8orf22                            | -0.093 | 0.937 | 2.436 | -0.165 |
| C8orf31                            | -0.375 | 0.771 | 2.692 | -1.376 |
| C8orf4                             | 0.147  | 1.107 | 2.894 | 0.492  |
| C8orf44-SGK3//SGK3//C8orf44        | -0.546 | 0.685 | 5.675 | -2.255 |
| C8orf46                            | -0.468 | 0.723 | 3.198 | -1.286 |
| C8orf46                            | -0.025 | 0.983 | 5.435 | -0.130 |
| C8orf58                            | -0.648 | 0.638 | 2.475 | -2.698 |
| C8orf88//RP11-122A3.2              | -0.396 | 0.760 | 3.846 | -1.430 |

|                       |        |       |       |        |
|-----------------------|--------|-------|-------|--------|
| C9orf117              | -0.329 | 0.796 | 2.395 | -0.607 |
| C9orf129              | 0.837  | 1.786 | 2.841 | 2.243  |
| C9orf142              | -0.498 | 0.708 | 5.243 | -2.327 |
| C9orf153              | -0.152 | 0.900 | 2.411 | -0.524 |
| C9orf16               | 0.485  | 1.399 | 3.489 | 1.608  |
| C9orf170              | -0.595 | 0.662 | 3.128 | -2.119 |
| C9orf172              | 0.229  | 1.172 | 4.560 | 0.937  |
| C9orf24               | -0.076 | 0.949 | 3.818 | -0.290 |
| C9orf3                | -0.541 | 0.687 | 4.550 | -2.112 |
| C9orf41               | 0.316  | 1.245 | 5.031 | 1.181  |
| C9orf47//S1PR3        | 0.199  | 1.148 | 3.086 | 0.825  |
| C9orf89               | 0.231  | 1.173 | 4.648 | 1.082  |
| C9orf91               | 0.856  | 1.809 | 5.884 | 2.437  |
| CA10                  | 0.745  | 1.676 | 6.510 | 2.093  |
| CA11                  | 1.113  | 2.163 | 7.457 | 2.405  |
| CA13//LOC100507258    | 0.433  | 1.350 | 3.581 | 1.960  |
| CA14                  | -0.856 | 0.552 | 4.550 | -1.747 |
| CA2                   | -0.993 | 0.503 | 6.047 | -2.981 |
| CA4                   | 0.312  | 1.241 | 3.011 | 0.800  |
| CA5B                  | 0.145  | 1.106 | 4.905 | 0.403  |
| CA5BP1                | -0.192 | 0.876 | 4.624 | -0.653 |
| CA7                   | 1.584  | 2.998 | 2.647 | 3.013  |
| CA8                   | -0.198 | 0.872 | 5.157 | -0.745 |
| CAAP1                 | 0.044  | 1.031 | 5.162 | 0.172  |
| CABLES1               | 0.441  | 1.358 | 5.953 | 1.115  |
| CABLES2               | 0.235  | 1.177 | 4.911 | 0.935  |
| CABP1                 | 1.726  | 3.309 | 3.593 | 3.480  |
| CABP7                 | -0.453 | 0.731 | 4.209 | -0.969 |
| CABYR                 | -0.038 | 0.974 | 5.247 | -0.164 |
| CACNA1A//LOC100507353 | 0.876  | 1.836 | 6.071 | 2.279  |
| CACNA1B               | 1.008  | 2.012 | 5.409 | 2.222  |
| CACNA1C               | 0.831  | 1.779 | 4.954 | 2.389  |
| CACNA1C-AS2           | 0.381  | 1.302 | 2.453 | 1.413  |
| CACNA1D               | 0.295  | 1.227 | 5.248 | 1.068  |
| CACNA1E               | 1.009  | 2.013 | 5.147 | 1.740  |
| CACNA1G               | 0.508  | 1.422 | 3.137 | 1.624  |
| CACNA1H               | 0.263  | 1.200 | 3.630 | 0.876  |
| CACNA1I               | 1.308  | 2.476 | 4.275 | 3.012  |
| CACNA2D1              | 0.408  | 1.327 | 7.062 | 1.606  |
| CACNA2D2              | 0.269  | 1.205 | 5.088 | 0.613  |
| CACNA2D3              | 0.958  | 1.943 | 5.671 | 2.541  |
| CACNB1                | 0.857  | 1.811 | 6.210 | 2.104  |
| CACNB2                | 1.295  | 2.454 | 5.348 | 2.604  |
| CACNB3                | 0.570  | 1.484 | 3.769 | 1.705  |
| CACNB4                | 1.092  | 2.131 | 6.722 | 2.836  |
| CACNG2                | 1.135  | 2.196 | 5.740 | 1.916  |
| CACNG3                | 1.808  | 3.501 | 6.867 | 2.533  |
| CACNG4                | -0.274 | 0.827 | 5.726 | -0.994 |
| CACNG5                | 0.156  | 1.114 | 2.314 | 0.491  |
| CACNG8                | 1.549  | 2.926 | 3.831 | 2.850  |

|                             |        |       |       |        |
|-----------------------------|--------|-------|-------|--------|
| CADM2                       | 0.533  | 1.447 | 7.285 | 2.018  |
| CADM3                       | 0.932  | 1.908 | 8.080 | 1.759  |
| CADM3-AS1//CTA-134P22.2     | 0.362  | 1.285 | 5.382 | 1.200  |
| CADPS                       | 0.942  | 1.922 | 7.471 | 2.125  |
| CADPS2                      | 1.465  | 2.761 | 6.078 | 3.144  |
| CAHM                        | -0.662 | 0.632 | 5.175 | -2.309 |
| CALB1                       | 0.349  | 1.274 | 6.451 | 0.597  |
| CALB2                       | -0.647 | 0.639 | 6.456 | -0.757 |
| CALCRL                      | -0.447 | 0.733 | 5.731 | -1.462 |
| CALHM1                      | 0.670  | 1.591 | 2.962 | 2.260  |
| CALHM2                      | -0.092 | 0.938 | 3.979 | -0.388 |
| CALM1//CALM2//CALM3         | 0.474  | 1.389 | 4.317 | 1.969  |
| CALY                        | 0.662  | 1.582 | 4.939 | 1.464  |
| CAMK1                       | 0.432  | 1.349 | 4.374 | 1.593  |
| CAMK1D                      | 1.024  | 2.033 | 6.976 | 2.756  |
| CAMK1G                      | 1.777  | 3.426 | 4.743 | 2.265  |
| CAMK2A                      | 1.859  | 3.628 | 7.727 | 2.711  |
| CAMK2B                      | 1.077  | 2.109 | 7.122 | 2.624  |
| CAMK2D                      | 0.698  | 1.623 | 6.579 | 3.434  |
| CAMK2G                      | 0.390  | 1.310 | 7.369 | 1.217  |
| CAMK2N1                     | 0.294  | 1.226 | 7.530 | 1.053  |
| CAMK2N2                     | 0.140  | 1.102 | 5.591 | 0.304  |
| CAMK4                       | 1.202  | 2.300 | 4.898 | 2.420  |
| CAMKK1                      | 1.151  | 2.221 | 4.970 | 2.769  |
| CAMKK2                      | 1.208  | 2.310 | 5.837 | 2.773  |
| CAMKV                       | 1.958  | 3.885 | 5.720 | 2.853  |
| CAMSAP2                     | 0.500  | 1.414 | 8.705 | 2.421  |
| CAMSAP3                     | 0.772  | 1.708 | 3.348 | 2.349  |
| CAMTA1                      | 0.243  | 1.184 | 7.376 | 1.038  |
| CAMTA2                      | 0.574  | 1.489 | 6.843 | 2.058  |
| CAND1                       | 0.278  | 1.213 | 6.554 | 1.324  |
| CAP2                        | 1.310  | 2.480 | 7.795 | 2.703  |
| CAPG                        | -0.063 | 0.957 | 3.239 | -0.248 |
| CAPN13                      | -0.468 | 0.723 | 2.372 | -1.497 |
| CAPN3//RP11-164J13.1        | -1.057 | 0.480 | 7.006 | -2.365 |
| CAPRIN2                     | 0.250  | 1.189 | 6.333 | 1.114  |
| CAPS                        | -0.866 | 0.549 | 5.653 | -2.380 |
| CAPS2                       | 0.950  | 1.932 | 4.210 | 3.807  |
| CARD11                      | -0.190 | 0.877 | 2.756 | -0.643 |
| CARD8                       | -0.627 | 0.648 | 4.698 | -2.946 |
| CARNS1                      | -1.176 | 0.442 | 7.175 | -2.398 |
| CARTPT                      | 0.267  | 1.203 | 5.209 | 0.418  |
| CASC1                       | 0.457  | 1.372 | 2.549 | 1.375  |
| CASC10                      | -0.334 | 0.793 | 4.118 | -1.162 |
| CASC14//RP1-67M12.2//CASC15 | -0.282 | 0.822 | 3.053 | -0.858 |
| CASD1                       | 0.338  | 1.264 | 7.303 | 1.582  |
| CASKIN1                     | 0.787  | 1.726 | 5.843 | 2.093  |
| CASP1                       | 0.015  | 1.011 | 2.267 | 0.056  |
| CASP10                      | -0.401 | 0.757 | 3.090 | -1.611 |
| CASP4                       | 0.357  | 1.280 | 2.880 | 1.244  |

|                         |        |       |       |        |
|-------------------------|--------|-------|-------|--------|
| CASP6                   | 0.122  | 1.088 | 2.103 | 0.477  |
| CASQ1                   | 1.188  | 2.278 | 4.097 | 2.885  |
| CAT                     | -0.616 | 0.653 | 6.851 | -2.288 |
| CATIP-AS1//AC021016.6   | -0.110 | 0.926 | 2.993 | -0.457 |
| CATSPER2//LOC101930343  | -0.100 | 0.933 | 3.810 | -0.372 |
| CAV1                    | -0.468 | 0.723 | 4.744 | -1.846 |
| CBFB                    | -0.535 | 0.690 | 7.628 | -2.236 |
| CBLN1                   | -0.062 | 0.958 | 2.982 | -0.184 |
| CBLN2                   | 2.023  | 4.065 | 4.872 | 2.918  |
| CBLN3                   | -0.089 | 0.940 | 3.569 | -0.334 |
| CBLN4                   | 1.392  | 2.625 | 3.479 | 2.575  |
| CBR1                    | -0.551 | 0.683 | 5.697 | -2.125 |
| CBR3                    | 0.111  | 1.080 | 2.984 | 0.397  |
| CBR3-AS1                | 0.410  | 1.329 | 2.145 | 1.511  |
| CBX6                    | 0.391  | 1.311 | 6.194 | 1.689  |
| CC2D1B                  | -0.546 | 0.685 | 3.930 | -2.413 |
| CCBE1                   | 1.203  | 2.303 | 2.776 | 2.717  |
| CCDC102B                | 0.049  | 1.034 | 4.842 | 0.181  |
| CCDC103//FAM187A        | 0.682  | 1.604 | 2.584 | 2.475  |
| CCDC104                 | 0.520  | 1.433 | 5.676 | 2.308  |
| CCDC109B                | 0.141  | 1.103 | 4.650 | 0.481  |
| CCDC11                  | -0.680 | 0.624 | 4.883 | -1.833 |
| CCDC110                 | 0.455  | 1.371 | 2.469 | 1.299  |
| CCDC113                 | 0.825  | 1.772 | 5.656 | 2.986  |
| CCDC114                 | 0.051  | 1.036 | 2.622 | 0.157  |
| CCDC122                 | -0.096 | 0.936 | 3.710 | -0.292 |
| CCDC132                 | 0.306  | 1.236 | 5.414 | 1.513  |
| CCDC135                 | 0.073  | 1.052 | 2.592 | 0.269  |
| CCDC13-AS1              | -0.676 | 0.626 | 2.975 | -1.808 |
| CCDC14                  | -0.247 | 0.843 | 6.463 | -0.969 |
| CCDC144B//CCDC144CP     | 0.094  | 1.067 | 5.551 | 0.317  |
| CCDC144B//RP11-219A15.1 | -0.454 | 0.730 | 3.693 | -1.054 |
| CCDC144B//RP11-219A15.1 | -0.509 | 0.703 | 4.080 | -1.052 |
| CCDC144CP               | -0.501 | 0.707 | 5.903 | -1.736 |
| CCDC146                 | -0.110 | 0.927 | 4.500 | -0.446 |
| CCDC147-AS1             | 0.917  | 1.888 | 2.556 | 2.816  |
| CCDC149                 | 0.391  | 1.312 | 5.053 | 2.058  |
| CCDC151                 | -0.348 | 0.786 | 3.576 | -1.120 |
| CCDC152                 | -0.351 | 0.784 | 3.985 | -1.250 |
| CCDC159                 | -0.483 | 0.715 | 3.516 | -1.896 |
| CCDC160                 | -0.861 | 0.550 | 2.706 | -2.911 |
| CCDC163P                | -0.230 | 0.853 | 3.689 | -0.715 |
| CCDC170                 | 0.324  | 1.252 | 3.671 | 1.153  |
| CCDC173                 | 0.257  | 1.195 | 2.681 | 0.747  |
| CCDC177                 | 1.229  | 2.344 | 3.608 | 2.644  |
| CCDC18                  | 0.017  | 1.012 | 2.811 | 0.057  |
| CCDC184//C12orf68       | 0.286  | 1.219 | 4.200 | 0.853  |
| CCDC19                  | -0.062 | 0.958 | 2.584 | -0.186 |
| CCDC3                   | 1.010  | 2.014 | 4.243 | 2.718  |
| CCDC30                  | 0.112  | 1.081 | 4.200 | 0.445  |

|                          |        |       |       |        |
|--------------------------|--------|-------|-------|--------|
| CCDC30                   | -0.093 | 0.938 | 3.094 | -0.314 |
| CCDC30                   | -0.056 | 0.962 | 3.379 | -0.171 |
| CCDC34                   | 0.248  | 1.188 | 2.811 | 0.857  |
| CCDC37                   | -0.358 | 0.780 | 1.824 | -0.930 |
| CCDC39//LOC101928882     | 0.316  | 1.245 | 2.922 | 1.228  |
| CCDC40                   | -0.354 | 0.782 | 3.190 | -1.288 |
| CCDC6                    | 0.324  | 1.252 | 7.942 | 1.450  |
| CCDC60                   | 0.157  | 1.115 | 1.892 | 0.498  |
| CCDC64                   | 0.528  | 1.442 | 3.201 | 1.648  |
| CCDC65                   | 0.675  | 1.597 | 2.075 | 2.934  |
| CCDC68                   | 0.938  | 1.916 | 2.491 | 3.489  |
| CCDC69                   | 0.371  | 1.294 | 3.836 | 1.237  |
| CCDC71                   | -0.003 | 0.998 | 4.398 | -0.010 |
| CCDC71L                  | 0.468  | 1.383 | 4.358 | 1.570  |
| CCDC8                    | -0.250 | 0.841 | 3.674 | -1.050 |
| CCDC80                   | 0.072  | 1.051 | 4.794 | 0.219  |
| CCDC81                   | -0.564 | 0.676 | 2.104 | -1.872 |
| CCDC85A                  | 0.707  | 1.632 | 6.082 | 2.421  |
| CCDC85B                  | 0.013  | 1.009 | 3.951 | 0.053  |
| CCER2//CTC-360G5.1       | -0.075 | 0.949 | 3.283 | -0.241 |
| CCK                      | 1.573  | 2.974 | 3.019 | 3.107  |
| CCKBR                    | 0.981  | 1.974 | 3.074 | 2.821  |
| CCL19                    | 0.683  | 1.606 | 3.308 | 2.126  |
| CCL2                     | 1.776  | 3.424 | 7.375 | 2.846  |
| CCL20                    | 0.071  | 1.051 | 2.474 | 0.190  |
| CCL3L3//CCL3L1           | -0.291 | 0.817 | 2.932 | -0.855 |
| CCL4L2//CCL4L1//CCL4     | 0.117  | 1.084 | 2.189 | 0.304  |
| CCL5                     | -0.181 | 0.882 | 3.518 | -0.512 |
| CCM2L                    | 0.206  | 1.154 | 3.525 | 0.769  |
| CCNA1                    | 0.880  | 1.841 | 3.741 | 2.048  |
| CCNA2                    | -0.764 | 0.589 | 3.797 | -2.092 |
| CCNB1                    | 0.413  | 1.331 | 2.684 | 1.630  |
| CCNB3//BCOR              | -0.545 | 0.685 | 2.293 | -1.907 |
| CCND1                    | -0.376 | 0.771 | 5.011 | -1.306 |
| CCND2-AS1//RP11-264F23.3 | 0.794  | 1.733 | 4.049 | 2.751  |
| CCNDBP1                  | 0.069  | 1.049 | 5.792 | 0.373  |
| CCNE1                    | 0.208  | 1.155 | 3.673 | 0.817  |
| CCNE2                    | -1.173 | 0.443 | 4.465 | -2.790 |
| CCNF                     | 0.468  | 1.383 | 2.933 | 1.756  |
| CCNG2                    | 0.299  | 1.230 | 3.604 | 1.232  |
| CCNL1                    | -0.098 | 0.934 | 6.530 | -0.397 |
| CCNO                     | 0.286  | 1.219 | 2.170 | 0.977  |
| CCNT2-AS1//AC016725.4    | 0.166  | 1.122 | 4.308 | 0.646  |
| CCP110                   | -0.400 | 0.758 | 7.312 | -1.506 |
| CCR1                     | -0.095 | 0.936 | 3.774 | -0.223 |
| CCRL2                    | -0.058 | 0.960 | 2.783 | -0.229 |
| CCRN4L                   | 0.403  | 1.322 | 4.214 | 1.537  |
| CCSAP                    | 0.145  | 1.106 | 5.560 | 0.712  |
| CCSER1                   | 1.033  | 2.047 | 3.099 | 2.821  |
| CCT6P1                   | 0.182  | 1.135 | 3.576 | 0.663  |

|                                   |        |       |       |        |
|-----------------------------------|--------|-------|-------|--------|
| CD109                             | 0.037  | 1.026 | 4.848 | 0.126  |
| CD14                              | -0.290 | 0.818 | 6.125 | -0.585 |
| CD151                             | -0.001 | 0.999 | 5.107 | -0.005 |
| CD163                             | 0.461  | 1.377 | 6.080 | 0.657  |
| CD164                             | -0.480 | 0.717 | 7.282 | -1.910 |
| CD177                             | 0.123  | 1.089 | 3.349 | 0.236  |
| CD177//CD177P1//CTC-490G23.5      | -0.142 | 0.906 | 3.334 | -0.212 |
| CD180                             | -0.168 | 0.890 | 4.577 | -0.359 |
| CD200                             | 0.472  | 1.387 | 7.505 | 1.604  |
| CD209                             | 0.277  | 1.212 | 2.157 | 0.827  |
| CD22                              | -1.384 | 0.383 | 6.646 | -2.917 |
| CD226                             | -0.355 | 0.782 | 3.580 | -0.938 |
| CD24                              | 0.551  | 1.465 | 4.319 | 1.288  |
| CD274                             | 0.215  | 1.161 | 3.262 | 0.789  |
| CD300A                            | -0.277 | 0.826 | 4.219 | -0.648 |
| CD300C                            | -0.010 | 0.993 | 3.435 | -0.032 |
| CD300LF                           | -0.292 | 0.817 | 2.825 | -0.939 |
| CD33                              | -0.340 | 0.790 | 3.206 | -1.049 |
| CD34                              | 0.369  | 1.292 | 5.680 | 1.082  |
| CD37                              | -0.766 | 0.588 | 5.702 | -1.872 |
| CD38                              | -0.109 | 0.927 | 4.382 | -0.275 |
| CD4                               | -0.195 | 0.874 | 3.716 | -0.694 |
| CD40                              | -0.324 | 0.799 | 3.848 | -1.278 |
| CD44                              | -1.008 | 0.497 | 6.118 | -1.722 |
| CD44//RP1-68D18.2                 | -0.550 | 0.683 | 3.664 | -1.106 |
| CD48                              | -0.034 | 0.977 | 1.680 | -0.122 |
| CD5                               | 0.068  | 1.048 | 2.771 | 0.253  |
| CD53                              | -0.577 | 0.670 | 6.268 | -1.889 |
| CD58                              | -0.342 | 0.789 | 4.045 | -1.612 |
| CD63                              | -0.165 | 0.892 | 5.834 | -0.880 |
| CD68//SNORA67//LOC101928634//RP1: | -0.443 | 0.735 | 8.608 | -1.109 |
| CD69                              | 0.241  | 1.182 | 2.501 | 0.529  |
| CD74                              | -0.511 | 0.702 | 6.003 | -1.297 |
| CD81                              | -0.293 | 0.816 | 3.481 | -1.630 |
| CD82                              | -0.311 | 0.806 | 4.090 | -1.123 |
| CD83                              | 0.497  | 1.411 | 5.804 | 1.753  |
| CD84                              | -0.476 | 0.719 | 3.418 | -1.081 |
| CD86                              | -0.744 | 0.597 | 4.878 | -1.667 |
| CD9                               | -0.427 | 0.744 | 3.975 | -1.517 |
| CD93                              | 0.361  | 1.285 | 5.419 | 1.113  |
| CD97                              | -0.424 | 0.745 | 4.850 | -1.239 |
| CD99                              | -0.857 | 0.552 | 9.192 | -2.522 |
| CD99P1                            | -0.197 | 0.872 | 3.883 | -0.799 |
| CDADC1                            | 0.258  | 1.195 | 4.672 | 1.282  |
| CDC14B                            | -0.848 | 0.556 | 4.203 | -1.786 |
| CDC40                             | 0.558  | 1.473 | 5.563 | 2.041  |
| CDC42EP1                          | -0.738 | 0.599 | 4.821 | -2.302 |
| CDC42EP2                          | -0.523 | 0.696 | 3.884 | -1.626 |
| CDC42EP4                          | -0.144 | 0.905 | 6.264 | -0.629 |
| CDC42SE2                          | 0.237  | 1.179 | 3.304 | 1.214  |



|                    |        |       |       |        |
|--------------------|--------|-------|-------|--------|
| CDC7               | 0.915  | 1.885 | 5.253 | 2.546  |
| CDCA7L             | -0.347 | 0.786 | 3.282 | -1.059 |
| CDCP1              | 0.135  | 1.098 | 3.380 | 0.463  |
| CDH1               | -0.353 | 0.783 | 3.586 | -0.951 |
| CDH10              | 1.059  | 2.084 | 6.352 | 2.540  |
| CDH12              | 0.881  | 1.841 | 3.076 | 2.035  |
| CDH13              | 1.261  | 2.396 | 6.425 | 2.634  |
| CDH18              | 1.098  | 2.140 | 4.615 | 2.255  |
| CDH19              | -0.893 | 0.538 | 4.632 | -1.670 |
| CDH20              | -0.712 | 0.610 | 6.721 | -2.723 |
| CDH22              | 1.146  | 2.213 | 5.185 | 2.526  |
| CDH26              | -0.093 | 0.937 | 3.255 | -0.359 |
| CDH3               | 0.751  | 1.683 | 3.387 | 2.113  |
| CDH4               | 0.451  | 1.367 | 4.095 | 1.777  |
| CDH5               | 0.559  | 1.473 | 6.304 | 2.144  |
| CDH7               | 0.687  | 1.610 | 3.882 | 1.669  |
| CDH8               | 0.596  | 1.512 | 6.497 | 1.693  |
| CDH9               | 1.986  | 3.962 | 3.412 | 2.956  |
| CDHR1              | 0.451  | 1.367 | 4.338 | 1.505  |
| CDK14              | 1.140  | 2.203 | 7.809 | 2.700  |
| CDK18              | -1.031 | 0.489 | 5.930 | -2.410 |
| CDK2               | 0.479  | 1.394 | 4.652 | 1.854  |
| CDK20              | 0.642  | 1.561 | 4.696 | 2.254  |
| CDK2AP2            | -0.622 | 0.650 | 4.065 | -2.009 |
| CDK5               | 0.454  | 1.370 | 6.231 | 1.760  |
| CDK5R1             | 1.101  | 2.145 | 5.455 | 2.395  |
| CDK5R2             | 0.655  | 1.574 | 4.684 | 1.892  |
| CDK6               | -0.481 | 0.716 | 4.891 | -1.794 |
| CDK7               | 0.298  | 1.229 | 4.739 | 1.417  |
| CDKL1              | 0.705  | 1.630 | 3.739 | 2.571  |
| CDKL2              | 0.518  | 1.432 | 5.315 | 2.158  |
| CDKL5              | 0.763  | 1.697 | 7.043 | 2.663  |
| CDKN1A             | 0.097  | 1.070 | 4.377 | 0.271  |
| CDKN1C             | -0.962 | 0.513 | 4.994 | -2.529 |
| CDKN2AIPNL         | 0.332  | 1.259 | 5.093 | 1.681  |
| CDKN2B             | -0.345 | 0.787 | 2.581 | -1.357 |
| CDKN2C             | -0.032 | 0.978 | 2.648 | -0.112 |
| CDKN2D             | 0.751  | 1.683 | 5.186 | 2.748  |
| CDKN3              | 0.700  | 1.624 | 2.289 | 2.931  |
| CDNF               | -0.119 | 0.921 | 3.388 | -0.417 |
| CDO1               | 0.545  | 1.459 | 6.640 | 1.805  |
| CDON               | 0.333  | 1.260 | 3.728 | 1.403  |
| CDR2//LOC101060399 | 0.559  | 1.473 | 4.733 | 1.821  |
| CDR2L              | -0.792 | 0.578 | 5.295 | -2.656 |
| CDRT15             | -0.187 | 0.878 | 3.592 | -0.709 |
| CDS1               | 1.139  | 2.202 | 5.287 | 2.182  |
| CDYL2              | 0.870  | 1.828 | 5.667 | 2.462  |
| CDYL2              | 0.889  | 1.852 | 4.247 | 2.047  |
| CEBPA              | -0.523 | 0.696 | 4.468 | -1.815 |
| CEBPB              | 0.252  | 1.191 | 4.646 | 0.980  |

|                                   |        |       |       |        |
|-----------------------------------|--------|-------|-------|--------|
| CEBPD                             | 0.185  | 1.137 | 6.707 | 0.511  |
| CECR1                             | -0.369 | 0.774 | 4.247 | -1.210 |
| CECR2                             | -0.887 | 0.541 | 4.449 | -2.537 |
| CECR6                             | 0.386  | 1.307 | 3.570 | 1.315  |
| CECR7                             | -0.203 | 0.868 | 3.488 | -0.710 |
| CELF2                             | 0.715  | 1.641 | 7.659 | 2.516  |
| CELF3                             | 0.962  | 1.948 | 4.307 | 2.196  |
| CELF4                             | 1.261  | 2.396 | 6.275 | 2.309  |
| CELF5                             | 1.040  | 2.057 | 5.031 | 2.157  |
| CELSR3                            | 0.518  | 1.432 | 3.645 | 1.699  |
| CEMIP//KIAA1199                   | 1.361  | 2.569 | 5.461 | 2.329  |
| CEND1                             | 0.725  | 1.653 | 5.733 | 2.124  |
| CENPB                             | -0.524 | 0.695 | 5.531 | -2.237 |
| CENPBD1                           | -0.032 | 0.978 | 4.752 | -0.136 |
| CENPBD1P1//RPL23AP79              | 0.386  | 1.307 | 4.281 | 1.649  |
| CENPJ                             | 0.055  | 1.039 | 3.793 | 0.251  |
| CENPP                             | 0.320  | 1.249 | 3.727 | 1.159  |
| CENPV                             | -0.109 | 0.927 | 5.257 | -0.471 |
| CEP170B                           | 0.643  | 1.562 | 5.353 | 2.041  |
| CEP19                             | 0.555  | 1.469 | 4.727 | 1.570  |
| CEP192                            | -0.445 | 0.734 | 6.167 | -1.612 |
| CEP57L1                           | 0.158  | 1.115 | 3.111 | 0.633  |
| CEP76                             | 0.069  | 1.049 | 3.854 | 0.318  |
| CEP85                             | -0.484 | 0.715 | 5.356 | -1.847 |
| CEP97                             | -0.240 | 0.847 | 6.774 | -1.079 |
| CERCAM                            | -0.654 | 0.635 | 6.699 | -1.512 |
| CERKL                             | 0.561  | 1.475 | 2.381 | 1.823  |
| CERS2                             | -1.024 | 0.492 | 4.437 | -3.251 |
| CERS6                             | 0.502  | 1.416 | 7.244 | 1.765  |
| CES1//LOC100653057                | 0.280  | 1.215 | 3.132 | 0.881  |
| CES1//LOC100653057//LOC100653086/ | 0.365  | 1.288 | 3.625 | 1.307  |
| CES4A//CES8                       | -0.215 | 0.862 | 5.301 | -0.703 |
| CFB//XXbac-BPG116M5.17            | -0.113 | 0.924 | 3.561 | -0.363 |
| CFD                               | -0.111 | 0.926 | 4.213 | -0.302 |
| CFH                               | 0.626  | 1.544 | 4.671 | 1.330  |
| CFI                               | 0.255  | 1.193 | 3.717 | 0.693  |
| CFL1P1                            | 0.217  | 1.162 | 2.874 | 1.005  |
| CFL2                              | -0.597 | 0.661 | 5.660 | -2.409 |
| CFLAR                             | -0.383 | 0.767 | 4.705 | -1.596 |
| CFP                               | -0.082 | 0.945 | 2.363 | -0.315 |
| CGB//CGB5//CGB8//CGB1             | 0.110  | 1.079 | 3.291 | 0.342  |
| CGN                               | -0.603 | 0.658 | 2.181 | -2.328 |
| CGREF1                            | 0.491  | 1.406 | 4.173 | 1.692  |
| CH25H                             | 0.743  | 1.674 | 5.486 | 1.648  |
| CHAC1                             | 0.261  | 1.198 | 4.317 | 0.689  |
| CHAD                              | -0.086 | 0.942 | 3.924 | -0.228 |
| CHADL                             | -0.510 | 0.702 | 4.777 | -1.095 |
| CHAF1A                            | 0.420  | 1.338 | 3.998 | 1.588  |
| CHAF1B                            | 0.717  | 1.643 | 3.619 | 2.421  |
| CHAT                              | -0.328 | 0.797 | 1.965 | -1.008 |

|                      |        |       |       |        |
|----------------------|--------|-------|-------|--------|
| CHCHD1               | 0.003  | 1.002 | 4.178 | 0.012  |
| CHCHD7               | 0.248  | 1.187 | 2.704 | 1.010  |
| CHD1L                | -0.340 | 0.790 | 6.109 | -1.348 |
| CHD3                 | 0.921  | 1.893 | 6.672 | 2.575  |
| CHD5                 | 1.545  | 2.918 | 5.307 | 2.362  |
| CHD7                 | -0.792 | 0.577 | 5.703 | -2.464 |
| CHDC2                | -0.618 | 0.651 | 3.029 | -1.960 |
| CHEK2                | 0.028  | 1.019 | 2.343 | 0.089  |
| CHFR//RNU6-327P      | -0.027 | 0.981 | 2.484 | -0.086 |
| CHGA                 | 1.287  | 2.440 | 5.141 | 2.178  |
| CHGB                 | 0.964  | 1.951 | 4.481 | 1.907  |
| CHI3L1               | 1.194  | 2.288 | 8.000 | 1.559  |
| CHI3L2               | -0.813 | 0.569 | 4.845 | -1.158 |
| CHIC1                | 0.161  | 1.118 | 5.882 | 0.761  |
| CHIT1                | 0.340  | 1.266 | 2.675 | 1.035  |
| CHKA                 | -0.512 | 0.701 | 6.140 | -1.903 |
| CHL1                 | 0.719  | 1.646 | 6.977 | 2.747  |
| CHL1-AS2             | -0.052 | 0.964 | 4.252 | -0.216 |
| CHM                  | 0.406  | 1.325 | 6.132 | 1.794  |
| CHML                 | 0.753  | 1.685 | 4.833 | 2.504  |
| CHN1                 | 1.435  | 2.703 | 5.007 | 3.538  |
| CHODL                | -0.598 | 0.661 | 2.149 | -1.772 |
| CHPF                 | 0.573  | 1.488 | 3.890 | 2.426  |
| CHRAC1               | -0.274 | 0.827 | 4.648 | -0.999 |
| CHRD                 | 0.690  | 1.614 | 3.532 | 2.160  |
| CHRD1                | 1.284  | 2.434 | 5.299 | 2.553  |
| CHRM1                | 1.173  | 2.255 | 2.809 | 2.557  |
| CHRM2                | -0.139 | 0.908 | 3.814 | -0.350 |
| CHRM3                | 1.349  | 2.548 | 3.331 | 2.997  |
| CHRM4                | 0.573  | 1.487 | 3.355 | 1.636  |
| CHRM5                | 0.167  | 1.123 | 2.655 | 0.201  |
| CHRNA1               | 0.330  | 1.257 | 2.518 | 1.016  |
| CHRNA4//LOC102723788 | 0.452  | 1.368 | 3.170 | 1.649  |
| CHRNA6               | 0.063  | 1.045 | 2.850 | 0.255  |
| CHRNA7//CHRFAM7A     | 0.071  | 1.051 | 2.941 | 0.184  |
| CHRN2                | 0.650  | 1.570 | 4.168 | 1.751  |
| CHST1                | 0.756  | 1.689 | 4.806 | 2.074  |
| CHST10               | 0.142  | 1.104 | 3.434 | 0.633  |
| CHST14               | -0.409 | 0.753 | 3.480 | -1.688 |
| CHST15               | 0.614  | 1.530 | 6.630 | 2.430  |
| CHST3                | -0.681 | 0.624 | 6.234 | -1.798 |
| CHST6                | -0.188 | 0.878 | 6.084 | -0.481 |
| CHST9                | -0.496 | 0.709 | 3.426 | -1.395 |
| CHSY3                | 0.996  | 1.994 | 3.404 | 2.534  |
| CHURC1-FNTB//FNTB    | -0.681 | 0.624 | 6.384 | -2.059 |
| CIART//C1orf51       | 0.299  | 1.230 | 4.270 | 1.067  |
| CIB1                 | -0.129 | 0.914 | 4.692 | -0.553 |
| CIDEA                | 0.540  | 1.454 | 2.767 | 2.247  |
| CIDEB                | -0.329 | 0.796 | 3.986 | -1.248 |
| CIDECF               | 0.370  | 1.293 | 4.317 | 1.332  |

|                     |        |       |       |        |
|---------------------|--------|-------|-------|--------|
| CIITA               | -0.814 | 0.569 | 4.825 | -2.265 |
| CINP                | -0.625 | 0.649 | 3.819 | -1.964 |
| CIRBP               | 0.605  | 1.521 | 3.400 | 2.164  |
| CIRBP               | 0.111  | 1.080 | 8.323 | 0.388  |
| CIRH1A              | 0.241  | 1.182 | 6.611 | 1.159  |
| CISD1               | 0.529  | 1.443 | 4.133 | 2.088  |
| CISH                | 0.149  | 1.109 | 2.804 | 0.464  |
| CIT//MIR1178        | 0.833  | 1.781 | 5.328 | 2.239  |
| CITED1              | 0.276  | 1.210 | 3.175 | 1.012  |
| CITED2              | 0.809  | 1.752 | 5.289 | 1.990  |
| CKAP2               | 0.521  | 1.435 | 4.761 | 1.897  |
| CKM                 | 0.534  | 1.448 | 2.595 | 1.750  |
| CKMT1A//CKMT1B      | 1.132  | 2.191 | 5.884 | 1.727  |
| CKMT2               | -0.588 | 0.665 | 4.964 | -2.079 |
| CLCA4               | -1.076 | 0.474 | 4.115 | -2.036 |
| CLCF1               | 0.245  | 1.185 | 3.345 | 1.010  |
| CLCN2               | -0.744 | 0.597 | 5.316 | -2.262 |
| CLCN4               | -0.013 | 0.991 | 7.469 | -0.071 |
| CLDN10              | 0.683  | 1.605 | 6.256 | 2.323  |
| CLDN11              | -1.063 | 0.479 | 5.205 | -2.403 |
| CLDN15              | -0.523 | 0.696 | 3.124 | -2.117 |
| CLDN16              | 0.910  | 1.879 | 2.564 | 3.950  |
| CLDN19              | 0.160  | 1.117 | 2.823 | 0.558  |
| CLDN3               | -0.041 | 0.972 | 3.273 | -0.169 |
| CLDN9               | -0.573 | 0.672 | 2.677 | -2.204 |
| CLDND1              | -0.983 | 0.506 | 8.345 | -2.907 |
| CLEC18B             | -0.231 | 0.852 | 3.267 | -0.638 |
| CLEC18C//CLEC18B    | -0.291 | 0.817 | 3.106 | -0.876 |
| CLEC2B              | 0.065  | 1.046 | 4.463 | 0.177  |
| CLEC2D              | 0.094  | 1.067 | 3.246 | 0.378  |
| CLEC2L              | 0.990  | 1.987 | 6.236 | 2.295  |
| CLEC4A              | 0.097  | 1.070 | 2.457 | 0.381  |
| CLEC5A              | -0.760 | 0.590 | 3.134 | -1.436 |
| CLEC7A              | -0.338 | 0.791 | 5.035 | -0.750 |
| CLEC9A              | -1.022 | 0.492 | 2.414 | -3.079 |
| CLGN                | 0.588  | 1.503 | 3.394 | 1.696  |
| CLIC1               | 0.027  | 1.019 | 6.483 | 0.109  |
| CLIC1               | 0.014  | 1.009 | 6.498 | 0.054  |
| CLIC1               | 0.005  | 1.003 | 6.481 | 0.020  |
| CLIC1//DDAH2        | -0.147 | 0.903 | 5.558 | -0.713 |
| CLIC1//DDAH2        | -0.148 | 0.903 | 5.539 | -0.702 |
| CLIC2               | 0.928  | 1.903 | 4.643 | 2.280  |
| CLIC3               | 0.205  | 1.153 | 2.084 | 0.916  |
| CLIC4               | -0.223 | 0.857 | 8.652 | -0.691 |
| CLK2P               | -0.581 | 0.669 | 2.660 | -1.660 |
| CLMN                | -0.633 | 0.645 | 5.470 | -1.685 |
| CLMP//ASAM          | 0.034  | 1.024 | 4.840 | 0.097  |
| CLN3//RP11-435110.4 | -0.588 | 0.665 | 5.476 | -2.487 |
| CLN6                | -0.236 | 0.849 | 3.684 | -0.871 |
| CLN8                | -0.209 | 0.865 | 4.469 | -0.846 |

|                              |        |       |       |        |
|------------------------------|--------|-------|-------|--------|
| CLOCK                        | 0.337  | 1.263 | 6.982 | 1.526  |
| CLSTN1                       | 0.610  | 1.526 | 8.836 | 2.600  |
| CLSTN2                       | 1.404  | 2.645 | 5.925 | 2.471  |
| CLSTN3                       | 0.959  | 1.944 | 5.534 | 1.982  |
| CLTB                         | 0.427  | 1.344 | 6.469 | 1.792  |
| CLTCL1                       | -0.369 | 0.774 | 3.983 | -1.366 |
| CLUL1                        | 0.527  | 1.441 | 2.678 | 1.443  |
| CLVS1                        | 0.764  | 1.698 | 4.025 | 1.866  |
| CLVS2                        | 1.315  | 2.488 | 5.826 | 2.505  |
| CLVS2                        | 1.355  | 2.558 | 5.238 | 2.445  |
| CLYBL                        | 0.455  | 1.371 | 2.693 | 1.703  |
| CMAS                         | 0.394  | 1.314 | 6.145 | 1.713  |
| CMKLR1                       | -0.470 | 0.722 | 4.765 | -1.518 |
| CMTM3                        | -0.268 | 0.831 | 4.933 | -0.982 |
| CMTM5                        | -1.408 | 0.377 | 6.206 | -2.704 |
| CMTM7                        | -0.245 | 0.844 | 3.829 | -0.677 |
| CMYA5                        | -0.262 | 0.834 | 4.631 | -1.170 |
| CNDP1                        | -0.814 | 0.569 | 9.308 | -1.700 |
| CNEP1R1//TMEM188             | 0.233  | 1.175 | 6.268 | 1.006  |
| CNGA3                        | -0.632 | 0.645 | 3.183 | -1.487 |
| CNGB1                        | 0.562  | 1.476 | 2.587 | 1.572  |
| CNIH2                        | 0.886  | 1.848 | 4.570 | 2.572  |
| CNIH3                        | 0.381  | 1.302 | 3.217 | 1.639  |
| CNKSR2                       | 1.267  | 2.406 | 7.076 | 2.815  |
| CNKSR3                       | -0.455 | 0.730 | 4.627 | -1.367 |
| CNN1                         | 0.670  | 1.591 | 4.600 | 1.715  |
| CNN2                         | -0.597 | 0.661 | 5.254 | -1.690 |
| CNN3                         | 0.265  | 1.201 | 8.002 | 0.936  |
| CNNM1                        | 0.985  | 1.980 | 4.436 | 2.227  |
| CNP                          | -0.946 | 0.519 | 4.582 | -2.261 |
| CNP                          | -0.738 | 0.599 | 9.602 | -1.999 |
| CNR1                         | 0.688  | 1.611 | 6.099 | 1.226  |
| CNR1                         | 0.714  | 1.640 | 6.063 | 1.213  |
| CNRIP1                       | 0.536  | 1.450 | 5.364 | 2.338  |
| CNST                         | 0.697  | 1.621 | 5.676 | 2.379  |
| CNTFR                        | -0.175 | 0.886 | 6.965 | -0.621 |
| CNTN2                        | -1.047 | 0.484 | 7.640 | -2.703 |
| CNTN3                        | 0.640  | 1.558 | 5.526 | 1.784  |
| CNTN4                        | 1.237  | 2.357 | 4.555 | 2.665  |
| CNTN5                        | 1.029  | 2.041 | 3.204 | 2.480  |
| CNTN6                        | 0.955  | 1.939 | 2.540 | 2.874  |
| CNTNAP1                      | 0.778  | 1.715 | 7.341 | 2.316  |
| CNTNAP2                      | 0.822  | 1.767 | 7.428 | 1.989  |
| CNTNAP3B//CNTNAP3//CNTNAP3P2 | 0.505  | 1.420 | 4.654 | 2.267  |
| CNTNAP4                      | -0.950 | 0.517 | 7.517 | -2.651 |
| CNTNAP5                      | 0.973  | 1.963 | 6.245 | 2.271  |
| COA6//SEC61A1                | 0.590  | 1.506 | 3.986 | 1.997  |
| COA7//SELRC1                 | 0.327  | 1.254 | 4.156 | 1.441  |
| COCH                         | 0.468  | 1.383 | 3.360 | 1.406  |
| COG1                         | 0.466  | 1.382 | 6.910 | 1.869  |

|                   |        |       |       |        |
|-------------------|--------|-------|-------|--------|
| COG6              | 0.205  | 1.152 | 6.107 | 0.966  |
| COL10A1           | 0.327  | 1.254 | 2.061 | 1.307  |
| COL12A1           | 0.871  | 1.828 | 4.414 | 2.616  |
| COL14A1           | -0.225 | 0.856 | 4.102 | -0.528 |
| COL15A1           | 0.056  | 1.039 | 2.224 | 0.229  |
| COL16A1           | -0.666 | 0.630 | 4.634 | -2.277 |
| COL18A1           | -0.321 | 0.801 | 4.820 | -1.042 |
| COL19A1           | 0.999  | 1.999 | 2.615 | 4.084  |
| COL1A1            | -0.114 | 0.924 | 3.478 | -0.470 |
| COL1A2            | 0.562  | 1.477 | 4.012 | 1.734  |
| COL24A1           | 0.739  | 1.669 | 2.705 | 2.592  |
| COL25A1           | -0.140 | 0.907 | 3.151 | -0.418 |
| COL26A1           | 0.625  | 1.543 | 4.275 | 2.067  |
| COL27A1           | 0.030  | 1.021 | 2.778 | 0.138  |
| COL28A1           | 0.125  | 1.091 | 3.047 | 0.378  |
| COL3A1            | 0.526  | 1.440 | 2.547 | 1.690  |
| COL4A1            | 0.457  | 1.372 | 4.338 | 1.230  |
| COL4A2            | 0.513  | 1.427 | 4.211 | 1.665  |
| COL4A3            | 0.101  | 1.072 | 2.290 | 0.372  |
| COL4A3BP          | 0.185  | 1.137 | 7.414 | 0.954  |
| COL4A5            | -0.841 | 0.558 | 5.054 | -1.807 |
| COL5A2            | 1.531  | 2.891 | 4.526 | 3.669  |
| COL6A2            | 0.356  | 1.280 | 4.260 | 1.298  |
| COL6A3            | 0.176  | 1.130 | 3.060 | 0.683  |
| COL8A1            | -0.219 | 0.859 | 2.194 | -0.787 |
| COL8A2            | -0.429 | 0.743 | 2.929 | -1.492 |
| COL9A1            | -0.215 | 0.862 | 2.973 | -0.774 |
| COL9A2            | -0.289 | 0.818 | 4.202 | -1.068 |
| COL9A3            | -0.297 | 0.814 | 4.194 | -1.131 |
| COLEC12           | 0.608  | 1.525 | 5.659 | 1.787  |
| COLGALT1//GLT25D1 | -0.048 | 0.967 | 6.224 | -0.197 |
| COLQ              | 0.305  | 1.236 | 3.535 | 1.013  |
| COMMD8            | 0.229  | 1.172 | 4.350 | 1.142  |
| COMT              | -0.542 | 0.687 | 3.718 | -2.557 |
| COPG2             | 0.256  | 1.195 | 5.045 | 0.997  |
| COPS4             | 0.386  | 1.307 | 6.025 | 1.930  |
| COPZ2             | -0.201 | 0.870 | 4.577 | -0.721 |
| COQ10B            | 0.344  | 1.269 | 5.422 | 1.416  |
| COQ3              | 0.464  | 1.379 | 3.543 | 1.905  |
| CORO1A            | -0.072 | 0.951 | 5.807 | -0.178 |
| CORO2A            | 0.400  | 1.319 | 3.036 | 0.879  |
| CORO6             | 0.744  | 1.674 | 4.745 | 2.286  |
| COTL1             | -0.453 | 0.731 | 7.210 | -1.806 |
| COX10             | 0.207  | 1.154 | 5.378 | 1.118  |
| COX11             | 0.381  | 1.302 | 5.698 | 1.710  |
| COX18             | 0.382  | 1.303 | 5.026 | 1.564  |
| COX6A2            | -0.043 | 0.970 | 2.305 | -0.164 |
| COX7A1            | 0.595  | 1.511 | 6.020 | 1.683  |
| CP                | -0.285 | 0.821 | 6.592 | -0.550 |
| CPA2              | -0.774 | 0.585 | 2.254 | -1.938 |

|                                 |        |       |       |        |
|---------------------------------|--------|-------|-------|--------|
| CPAMD8                          | -1.315 | 0.402 | 5.984 | -2.131 |
| CPB2-AS1                        | -0.534 | 0.691 | 4.648 | -1.205 |
| CPEB2                           | -0.576 | 0.671 | 6.922 | -2.321 |
| CPEB3                           | 0.803  | 1.745 | 5.684 | 2.211  |
| CPED1                           | -0.029 | 0.980 | 4.408 | -0.110 |
| CPLX1                           | 0.792  | 1.731 | 5.218 | 2.067  |
| CPLX2                           | 0.612  | 1.528 | 3.320 | 1.403  |
| CPLX3//RP11-414J4.2             | 0.336  | 1.262 | 4.546 | 1.064  |
| CPLX3//RP11-414J4.2//LMAN1L     | 0.125  | 1.090 | 2.746 | 0.408  |
| CPM                             | -0.712 | 0.610 | 5.087 | -1.792 |
| CPNE2                           | -1.044 | 0.485 | 7.451 | -3.842 |
| CPNE4                           | 1.769  | 3.407 | 4.775 | 2.801  |
| CPNE5                           | 1.076  | 2.108 | 4.592 | 2.388  |
| CPNE7                           | 0.732  | 1.661 | 3.422 | 2.518  |
| CPNE8                           | 0.892  | 1.856 | 4.959 | 3.241  |
| CPNE9                           | 0.543  | 1.457 | 4.143 | 1.344  |
| CPO                             | 0.336  | 1.263 | 2.006 | 1.286  |
| CPOX                            | -0.948 | 0.518 | 5.953 | -2.869 |
| CPOX                            | 0.218  | 1.163 | 2.320 | 0.619  |
| CPPED1                          | -0.658 | 0.634 | 6.639 | -1.934 |
| CPQ                             | -0.692 | 0.619 | 3.845 | -2.790 |
| CPS1                            | -0.782 | 0.582 | 4.710 | -1.707 |
| CPT1C                           | 0.214  | 1.160 | 6.103 | 0.877  |
| CPT2                            | -0.483 | 0.715 | 4.781 | -1.599 |
| CPVL                            | -0.179 | 0.883 | 2.820 | -0.493 |
| CPXM1                           | 0.082  | 1.058 | 2.507 | 0.246  |
| CPXM2                           | -1.237 | 0.424 | 4.287 | -3.248 |
| CR1                             | -0.066 | 0.955 | 2.871 | -0.171 |
| CRABP1                          | -0.144 | 0.905 | 4.844 | -0.330 |
| CRABP2                          | 0.731  | 1.660 | 2.831 | 2.501  |
| CRADD                           | -0.790 | 0.578 | 3.772 | -3.249 |
| CRB2                            | -0.137 | 0.909 | 5.223 | -0.691 |
| CREB3L2                         | -0.626 | 0.648 | 4.557 | -2.855 |
| CREB3L3                         | 0.524  | 1.438 | 3.227 | 1.873  |
| CREB3L4                         | 0.039  | 1.027 | 2.642 | 0.155  |
| CREB5//LOC401317                | -0.509 | 0.703 | 3.714 | -1.503 |
| CREG1                           | 0.185  | 1.137 | 5.421 | 0.732  |
| CREG2                           | 2.058  | 4.165 | 4.962 | 2.797  |
| CRELD1                          | -0.053 | 0.964 | 5.034 | -0.251 |
| CRH                             | -0.644 | 0.640 | 2.178 | -1.521 |
| CRHBP                           | 0.033  | 1.023 | 5.205 | 0.101  |
| CRHR1-IT1//MGC57346//AC126544.2 | 0.162  | 1.119 | 4.660 | 0.672  |
| CRHR2                           | 0.426  | 1.344 | 3.560 | 1.461  |
| CRIPAK                          | 0.121  | 1.088 | 4.291 | 0.485  |
| CRISPLD1                        | -0.286 | 0.820 | 5.422 | -0.692 |
| CRISPLD2                        | 0.017  | 1.012 | 5.608 | 0.054  |
| CRLF1                           | 0.445  | 1.362 | 4.247 | 1.116  |
| CRMP1                           | 0.570  | 1.484 | 4.785 | 2.105  |
| CRNDE                           | -1.177 | 0.442 | 3.545 | -2.328 |
| CROCCP2                         | -0.252 | 0.840 | 2.985 | -0.894 |

|                                    |        |       |       |        |
|------------------------------------|--------|-------|-------|--------|
| CROT                               | 0.483  | 1.397 | 4.582 | 2.164  |
| CRTAC1                             | 0.317  | 1.245 | 4.558 | 1.404  |
| CRTAP                              | -0.148 | 0.902 | 7.276 | -0.751 |
| CRTC1                              | 0.544  | 1.458 | 5.573 | 1.701  |
| CRTC3                              | -0.703 | 0.614 | 5.409 | -2.760 |
| CRY2                               | 0.409  | 1.328 | 5.337 | 1.603  |
| CRYAB                              | -0.990 | 0.503 | 7.989 | -3.569 |
| CRYBB1                             | 0.426  | 1.343 | 2.680 | 1.019  |
| CRYBG3                             | -0.802 | 0.574 | 6.125 | -2.618 |
| CRYGS                              | -0.277 | 0.826 | 3.159 | -1.133 |
| CRYL1                              | -0.298 | 0.813 | 6.525 | -1.024 |
| CRYM                               | 2.267  | 4.814 | 3.933 | 3.172  |
| CSAD                               | -0.335 | 0.793 | 5.433 | -1.354 |
| CSAG1//CSAG3                       | 0.126  | 1.091 | 2.296 | 0.416  |
| CSF1                               | -0.650 | 0.637 | 3.714 | -2.522 |
| CSF1R                              | -0.723 | 0.606 | 7.734 | -2.046 |
| CSF2RA                             | -1.012 | 0.496 | 4.682 | -2.805 |
| CSF2RA                             | -0.651 | 0.637 | 4.322 | -1.972 |
| CSF3                               | -0.175 | 0.886 | 3.395 | -0.326 |
| CSF3R                              | -0.428 | 0.744 | 3.039 | -1.152 |
| CSMD1                              | 0.972  | 1.962 | 5.365 | 2.569  |
| CSMD3                              | 0.686  | 1.609 | 5.840 | 1.830  |
| CSNK1E//RP3-449O17.1               | -0.056 | 0.962 | 4.017 | -0.180 |
| CSNK2A3                            | 0.176  | 1.130 | 4.160 | 0.515  |
| CSPG4                              | -0.160 | 0.895 | 3.817 | -0.645 |
| CSPG4P1Y//CSPG4P2Y//CSPG4P3Y//DNI  | 0.393  | 1.313 | 3.348 | 1.620  |
| CSPG5                              | 0.580  | 1.495 | 5.480 | 2.234  |
| CSRNP1                             | 0.248  | 1.187 | 5.107 | 0.880  |
| CSRNP2                             | 0.132  | 1.096 | 5.420 | 0.685  |
| CSRNP3                             | 1.067  | 2.095 | 6.284 | 2.674  |
| CSRNP2BP//PET117                   | 0.442  | 1.359 | 4.689 | 2.133  |
| CST4                               | 0.468  | 1.383 | 2.416 | 1.676  |
| CST7                               | -0.078 | 0.947 | 4.350 | -0.209 |
| CSTF3                              | 0.289  | 1.222 | 5.249 | 1.357  |
| CTA-212D2.2                        | -0.097 | 0.935 | 2.237 | -0.271 |
| CTA-797E19.1                       | -0.511 | 0.702 | 3.875 | -2.003 |
| CTAG2                              | 0.086  | 1.061 | 2.608 | 0.305  |
| CTAGE6                             | -0.231 | 0.852 | 3.332 | -0.758 |
| CTAGE8//CTAGE4//CTAGE9//CTAGE6//C  | -0.140 | 0.908 | 3.731 | -0.681 |
| CTB-118N6.3                        | -0.620 | 0.651 | 2.326 | -1.841 |
| CTB-131B5.2                        | -0.397 | 0.760 | 2.240 | -1.313 |
| CTB-134H23.2//LOC613037//NPIPB9//N | -0.470 | 0.722 | 7.339 | -2.005 |
| CTB-25B13.12                       | -0.567 | 0.675 | 2.343 | -2.275 |
| CTB-78F1.1                         | 1.325  | 2.505 | 1.981 | 2.997  |
| CTBS                               | -0.133 | 0.912 | 5.795 | -0.338 |
| CTC-218H9.1                        | 1.115  | 2.166 | 2.017 | 3.141  |
| CTC-255N20.1                       | -0.323 | 0.800 | 3.488 | -1.402 |
| CTC-301O7.4                        | -0.195 | 0.874 | 2.761 | -0.648 |
| CTC-304I17.5                       | 0.315  | 1.244 | 3.145 | 0.985  |
| CTC-321K16.1                       | 0.660  | 1.580 | 1.996 | 2.733  |



|                             |        |       |       |        |
|-----------------------------|--------|-------|-------|--------|
| CTC-329D1.3                 | -0.485 | 0.714 | 3.177 | -1.618 |
| CTC-338M12.9                | -0.040 | 0.973 | 3.501 | -0.146 |
| CTC-340D7.1                 | 0.597  | 1.513 | 2.384 | 1.940  |
| CTC-367F4.1                 | 0.160  | 1.118 | 2.658 | 0.462  |
| CTC-458G6.2                 | -0.919 | 0.529 | 3.155 | -2.570 |
| CTC-467M3.1                 | 0.980  | 1.972 | 2.987 | 3.366  |
| CTC-467M3.3                 | 0.273  | 1.209 | 2.164 | 0.832  |
| CTC-498M16.4                | 0.281  | 1.215 | 2.861 | 0.882  |
| CTC-552D5.1                 | 0.871  | 1.830 | 1.688 | 1.939  |
| CTC-806A22.1                | 0.596  | 1.511 | 2.079 | 1.897  |
| CTD-2014B16.3               | 0.458  | 1.374 | 2.333 | 1.738  |
| CTD-2015H6.3                | 0.487  | 1.401 | 4.039 | 1.740  |
| CTD-2017C7.2                | -0.660 | 0.633 | 3.368 | -1.931 |
| CTD-2020K17.3               | 0.241  | 1.181 | 3.441 | 0.595  |
| CTD-2026D20.2               | -1.067 | 0.477 | 3.064 | -2.824 |
| CTD-2033D15.1               | 0.218  | 1.163 | 2.416 | 0.692  |
| CTD-2054N24.1               | 0.298  | 1.230 | 3.454 | 0.812  |
| CTD-2054N24.2               | -0.327 | 0.797 | 3.004 | -0.965 |
| CTD-2058B24.3               | -0.535 | 0.690 | 3.532 | -1.523 |
| CTD-2152M20.2               | -0.168 | 0.890 | 2.576 | -0.572 |
| CTD-2175A23.1               | -1.029 | 0.490 | 2.498 | -1.808 |
| CTD-2184D3.6                | 1.059  | 2.084 | 2.691 | 3.856  |
| CTD-2193P3.2                | 0.425  | 1.343 | 3.980 | 1.946  |
| CTD-2201G16.1               | -0.060 | 0.959 | 2.961 | -0.199 |
| CTD-2215E18.1               | 0.071  | 1.051 | 2.584 | 0.251  |
| CTD-2223O18.1               | -0.189 | 0.877 | 2.352 | -0.711 |
| CTD-2269F5.1                | 0.079  | 1.056 | 3.330 | 0.295  |
| CTD-2277K2.1                | 0.733  | 1.662 | 3.686 | 2.244  |
| CTD-2281E23.2               | 1.037  | 2.052 | 1.618 | 3.555  |
| CTD-2298J14.2               | 1.159  | 2.233 | 4.124 | 2.577  |
| CTD-2320G14.2               | 0.648  | 1.567 | 2.253 | 2.856  |
| CTD-2369P2.10//FDX1L        | 0.346  | 1.271 | 5.073 | 1.457  |
| CTD-2501E16.2//LOC101928784 | -0.336 | 0.792 | 2.942 | -1.200 |
| CTD-2531D15.5               | 0.645  | 1.564 | 3.327 | 2.598  |
| CTD-2538C1.2                | 0.301  | 1.232 | 3.037 | 1.121  |
| CTD-2555A7.2                | 0.396  | 1.315 | 2.685 | 1.229  |
| CTD-2555K7.2                | -0.368 | 0.775 | 2.556 | -1.061 |
| CTD-2555O16.2               | -0.236 | 0.849 | 4.427 | -0.804 |
| CTD-2562J17.4               | 0.383  | 1.304 | 2.987 | 1.618  |
| CTD-2562J17.9               | 0.479  | 1.394 | 2.207 | 2.012  |
| CTD-2574D22.2               | -0.076 | 0.948 | 2.392 | -0.300 |
| CTD-2647L4.5                | -0.528 | 0.694 | 4.173 | -1.807 |
| CTD-3064C13.1               | 0.115  | 1.083 | 2.275 | 0.475  |
| CTD-3092A11.1               | -0.234 | 0.851 | 4.498 | -0.763 |
| CTD-3138B18.5               | 0.082  | 1.058 | 2.752 | 0.299  |
| CTD-3195I5.5//C17orf85      | 0.128  | 1.092 | 2.499 | 0.462  |
| CTDSP1                      | -0.407 | 0.754 | 3.626 | -1.785 |
| CTF1                        | -0.004 | 0.998 | 4.389 | -0.013 |
| CTGF                        | -0.031 | 0.979 | 5.520 | -0.081 |
| CTH                         | 0.387  | 1.308 | 4.203 | 1.655  |

|                                     |        |       |       |        |
|-------------------------------------|--------|-------|-------|--------|
| CTIF                                | 0.256  | 1.194 | 6.680 | 1.032  |
| CTNNA1                              | -0.462 | 0.726 | 6.326 | -2.031 |
| CTNNA2                              | 0.858  | 1.813 | 2.914 | 3.211  |
| CTNNA3                              | -1.416 | 0.375 | 6.741 | -2.697 |
| CTNNAL1                             | 0.417  | 1.335 | 4.579 | 1.246  |
| CTNS                                | -0.513 | 0.701 | 3.954 | -2.134 |
| CTPS2                               | -0.323 | 0.799 | 5.410 | -1.268 |
| CTSC                                | 0.093  | 1.066 | 5.139 | 0.234  |
| CTSH                                | 0.359  | 1.282 | 4.066 | 1.309  |
| CTSK                                | 0.225  | 1.169 | 3.598 | 0.829  |
| CTSLP2//CTSLP7//CTSLP4//CTSLP1//CTS | -0.106 | 0.929 | 3.948 | -0.453 |
| CTSO                                | 0.180  | 1.133 | 5.951 | 0.648  |
| CTSS                                | -0.505 | 0.705 | 6.175 | -1.407 |
| CTSV                                | -0.373 | 0.772 | 2.449 | -1.328 |
| CTSW                                | -0.252 | 0.840 | 2.535 | -0.846 |
| CTSZ                                | -0.161 | 0.894 | 6.093 | -0.602 |
| CTXN1                               | 1.090  | 2.129 | 5.402 | 2.446  |
| CTXN2                               | 0.657  | 1.577 | 2.642 | 1.514  |
| CTXN3                               | 1.616  | 3.065 | 3.183 | 2.727  |
| CUEDC1                              | -0.612 | 0.654 | 3.810 | -1.921 |
| CUEDC1                              | -0.363 | 0.778 | 5.371 | -1.192 |
| CUL1                                | 0.213  | 1.159 | 7.211 | 1.003  |
| CUX2                                | 0.940  | 1.918 | 3.258 | 1.953  |
| CWC22                               | 0.392  | 1.312 | 6.066 | 1.968  |
| CWF19L1                             | 0.117  | 1.084 | 5.109 | 0.443  |
| CX3CL1                              | 0.705  | 1.630 | 6.765 | 1.946  |
| CX3CR1                              | -1.113 | 0.462 | 4.346 | -1.983 |
| CXCL10                              | -0.577 | 0.670 | 2.558 | -1.050 |
| CXCL11                              | -0.257 | 0.837 | 2.549 | -0.695 |
| CXCL12                              | 0.067  | 1.047 | 3.787 | 0.240  |
| CXCL14                              | 1.843  | 3.588 | 6.880 | 2.556  |
| CXCL16                              | -0.215 | 0.862 | 6.342 | -0.627 |
| CXCL2                               | 0.031  | 1.022 | 2.810 | 0.084  |
| CXCL5                               | 0.069  | 1.049 | 3.916 | 0.243  |
| CXCL9                               | -0.096 | 0.936 | 1.966 | -0.245 |
| CXCR1                               | 0.323  | 1.251 | 2.642 | 0.783  |
| CXCR4                               | -0.764 | 0.589 | 7.503 | -1.989 |
| CXorf21                             | 0.092  | 1.066 | 2.346 | 0.279  |
| CXorf22                             | -0.492 | 0.711 | 3.814 | -1.414 |
| CXorf28                             | -1.061 | 0.479 | 2.453 | -1.962 |
| CXorf30                             | -0.531 | 0.692 | 2.443 | -1.763 |
| CXXC4                               | 0.017  | 1.012 | 4.450 | 0.057  |
| CYB561                              | 0.784  | 1.722 | 4.244 | 2.376  |
| CYB561A3//CYBASC3                   | -0.175 | 0.886 | 2.496 | -0.789 |
| CYB561D2//XXcos-LUCA11.5//XXcos-LU  | -0.054 | 0.963 | 2.453 | -0.195 |
| CYB5A                               | -0.248 | 0.842 | 7.284 | -1.002 |
| CYB5R2                              | 0.094  | 1.067 | 3.832 | 0.343  |
| CYB5R3                              | -0.215 | 0.862 | 6.998 | -1.000 |
| CYBA                                | -0.376 | 0.771 | 4.584 | -1.043 |
| CYBB                                | -0.325 | 0.798 | 7.387 | -0.608 |

|                           |        |       |       |        |
|---------------------------|--------|-------|-------|--------|
| CYBRD1                    | -0.256 | 0.837 | 7.699 | -0.912 |
| CYFIP2                    | 0.627  | 1.544 | 7.131 | 2.368  |
| CYGB                      | 0.563  | 1.477 | 5.220 | 1.569  |
| CYP1B1                    | 0.908  | 1.876 | 5.227 | 2.066  |
| CYP20A1                   | -0.546 | 0.685 | 4.814 | -2.066 |
| CYP21A1P                  | -0.142 | 0.906 | 3.662 | -0.593 |
| CYP26B1                   | 0.526  | 1.440 | 2.292 | 1.762  |
| CYP27A1                   | -1.188 | 0.439 | 6.988 | -3.094 |
| CYP2B7P//CYP2B7P1         | 0.743  | 1.673 | 3.062 | 1.701  |
| CYP2D7P//CYP2D6//CYP2D7P1 | 0.155  | 1.113 | 2.707 | 0.446  |
| CYP2E1                    | 0.420  | 1.337 | 3.222 | 1.782  |
| CYP2J2                    | -0.922 | 0.528 | 4.288 | -3.069 |
| CYP2S1                    | -0.151 | 0.901 | 3.549 | -0.565 |
| CYP46A1                   | 0.748  | 1.679 | 5.487 | 2.333  |
| CYP4F11                   | 0.236  | 1.177 | 4.823 | 0.740  |
| CYP4F26P//RP11-255A11.21  | 0.265  | 1.201 | 2.549 | 0.529  |
| CYP4F3                    | -1.661 | 0.316 | 2.314 | -3.098 |
| CYP4X1                    | 1.010  | 2.013 | 4.598 | 1.909  |
| CYP7B1                    | -0.957 | 0.515 | 5.797 | -2.292 |
| CYR61                     | 0.176  | 1.130 | 4.713 | 0.466  |
| CYSLTR2                   | 0.490  | 1.405 | 2.593 | 1.619  |
| CYTH1                     | -0.559 | 0.679 | 5.582 | -2.185 |
| CYTH3                     | 0.437  | 1.354 | 2.906 | 2.013  |
| CYTH4                     | -0.193 | 0.875 | 3.962 | -0.561 |
| CYTIP                     | -0.250 | 0.841 | 2.472 | -0.781 |
| CYTL1                     | -0.198 | 0.872 | 4.711 | -0.477 |
| CYYR1                     | 0.267  | 1.203 | 4.017 | 0.881  |
| D2HGDH                    | -0.049 | 0.966 | 3.594 | -0.203 |
| DAAM2                     | -1.193 | 0.437 | 7.492 | -2.641 |
| DAB1                      | 0.353  | 1.277 | 4.225 | 1.103  |
| DAB2//LOC101926921        | 0.038  | 1.027 | 4.354 | 0.143  |
| DACH1                     | 0.628  | 1.546 | 4.405 | 2.115  |
| DACH2                     | 0.361  | 1.285 | 1.743 | 1.287  |
| DACT1                     | -0.003 | 0.998 | 3.521 | -0.012 |
| DAGLA                     | 0.872  | 1.830 | 5.623 | 2.461  |
| DAGLB                     | 0.284  | 1.218 | 6.483 | 1.009  |
| DAO                       | -1.643 | 0.320 | 5.270 | -2.078 |
| DAPK1                     | 0.655  | 1.575 | 7.127 | 1.983  |
| DAPK2                     | -0.615 | 0.653 | 3.542 | -2.318 |
| DAPP1                     | -0.222 | 0.857 | 2.120 | -0.818 |
| DAW1                      | 0.310  | 1.240 | 2.402 | 0.795  |
| DBF4B                     | -0.556 | 0.680 | 3.587 | -2.207 |
| DBH                       | -0.435 | 0.740 | 2.637 | -1.362 |
| DBI                       | -0.213 | 0.863 | 5.400 | -1.006 |
| DBNDD1                    | 0.435  | 1.352 | 5.053 | 1.606  |
| DBP                       | 0.371  | 1.293 | 6.050 | 1.471  |
| DBX2                      | -0.739 | 0.599 | 4.453 | -2.577 |
| DCAF12L2                  | 0.261  | 1.198 | 2.317 | 1.020  |
| DCAF13P3                  | -0.122 | 0.919 | 2.437 | -0.373 |
| DCAF6                     | 0.840  | 1.790 | 5.595 | 2.789  |

|                                                       |        |       |       |        |
|-------------------------------------------------------|--------|-------|-------|--------|
| DCC                                                   | 0.593  | 1.509 | 5.233 | 1.794  |
| DCDC1//DCDC5                                          | -0.116 | 0.923 | 2.722 | -0.441 |
| DCDC2                                                 | 0.763  | 1.698 | 2.938 | 2.476  |
| DCHS2                                                 | 0.201  | 1.149 | 4.339 | 0.696  |
| DCLRE1A                                               | 0.404  | 1.323 | 5.007 | 1.867  |
| DCN                                                   | 0.436  | 1.353 | 3.045 | 1.729  |
| DCP2                                                  | 0.346  | 1.271 | 5.373 | 1.526  |
| DCT                                                   | 0.175  | 1.129 | 3.247 | 0.682  |
| DCTN1-AS1                                             | 0.170  | 1.125 | 3.796 | 0.655  |
| DCUN1D3                                               | 0.350  | 1.274 | 4.547 | 1.561  |
| DCX                                                   | 0.475  | 1.390 | 2.775 | 1.658  |
| DDAH1                                                 | 0.287  | 1.220 | 3.783 | 1.170  |
| DDAH2                                                 | -0.266 | 0.832 | 5.284 | -1.184 |
| DDAH2                                                 | -0.255 | 0.838 | 5.299 | -1.145 |
| DDB2                                                  | 0.033  | 1.023 | 4.365 | 0.113  |
| DDIT4                                                 | -1.243 | 0.422 | 7.493 | -3.125 |
| DDN                                                   | 2.522  | 5.745 | 3.560 | 3.107  |
| DDO                                                   | -0.290 | 0.818 | 3.773 | -0.795 |
| DDR1//MIR4640                                         | -0.868 | 0.548 | 7.217 | -3.092 |
| DDR1//MIR4640                                         | -0.854 | 0.553 | 7.114 | -3.051 |
| DDR1//MIR4640                                         | -0.816 | 0.568 | 7.068 | -2.881 |
| DDR1//MIR4640                                         | -0.712 | 0.610 | 4.977 | -2.599 |
| DDR1//MIR4640//Error in gsub("^[:space:;]+ [:space:;] |        | 1.000 |       |        |
| DDR2                                                  | -0.249 | 0.842 | 6.330 | -0.839 |
| DDX1                                                  | 0.294  | 1.226 | 7.490 | 1.581  |
| DDX10                                                 | 0.393  | 1.313 | 4.951 | 1.918  |
| DDX11L10                                              | 0.395  | 1.315 | 2.300 | 1.345  |
| DDX11L2                                               | 0.052  | 1.037 | 3.052 | 0.137  |
| DDX11L2//DDX11L9//DDX11L10//DDX1:                     | 0.313  | 1.242 | 3.009 | 1.221  |
| DDX11L5                                               | 0.007  | 1.005 | 2.634 | 0.023  |
| DDX12P                                                | -0.231 | 0.852 | 3.783 | -0.730 |
| DDX20                                                 | 0.227  | 1.170 | 2.849 | 0.959  |
| DDX25                                                 | 0.792  | 1.732 | 4.463 | 2.299  |
| DDX39A                                                | -0.505 | 0.704 | 5.058 | -2.272 |
| DDX3Y                                                 | -0.011 | 0.992 | 4.317 | -0.010 |
| DDX55                                                 | -0.012 | 0.991 | 4.448 | -0.044 |
| DDX60                                                 | -0.146 | 0.904 | 4.050 | -0.482 |
| DDX60L                                                | -0.501 | 0.707 | 3.429 | -2.234 |
| DEDD2                                                 | 0.243  | 1.183 | 5.119 | 0.795  |
| DEF6                                                  | -0.603 | 0.658 | 3.395 | -1.592 |
| DEFA1B//DEFA1//DEFA3                                  | -0.737 | 0.600 | 3.061 | -1.353 |
| DEFA1B//DEFA1//DEFA3                                  | -0.704 | 0.614 | 3.054 | -1.276 |
| DENND1B                                               | 0.262  | 1.199 | 4.261 | 1.131  |
| DENND1C                                               | -0.164 | 0.892 | 2.921 | -0.515 |
| DENND2A                                               | -0.404 | 0.756 | 4.734 | -1.455 |
| DENND2D                                               | 0.110  | 1.079 | 3.260 | 0.441  |
| DENND3                                                | 0.078  | 1.056 | 5.322 | 0.262  |
| DENND5A                                               | -0.420 | 0.748 | 8.167 | -1.795 |
| DENND5B                                               | 0.293  | 1.225 | 6.649 | 1.194  |
| DENND6B                                               | 0.516  | 1.430 | 5.178 | 1.970  |

|                                    |        |       |       |        |
|------------------------------------|--------|-------|-------|--------|
| DENR                               | 0.372  | 1.294 | 5.518 | 1.601  |
| DEPDC1B                            | -0.519 | 0.698 | 2.779 | -1.496 |
| DEPTOR                             | -0.729 | 0.603 | 5.372 | -3.181 |
| DES                                | 0.944  | 1.924 | 2.678 | 1.847  |
| DFFB                               | -0.054 | 0.963 | 3.468 | -0.243 |
| DFNA5                              | -0.196 | 0.873 | 5.553 | -0.800 |
| DFNB31                             | -0.927 | 0.526 | 5.512 | -2.805 |
| DGAT2                              | 0.587  | 1.502 | 2.809 | 2.567  |
| DGCR10                             | 0.583  | 1.498 | 2.403 | 1.427  |
| DGCR11                             | 0.036  | 1.025 | 1.799 | 0.123  |
| DGCR14//TSSK2                      | -0.194 | 0.874 | 4.638 | -0.756 |
| DGCR9//AC000095.10                 | 0.974  | 1.965 | 3.143 | 1.766  |
| DGKA                               | 0.368  | 1.291 | 4.453 | 1.291  |
| DGKB                               | 1.024  | 2.033 | 5.618 | 2.346  |
| DGKE                               | 0.674  | 1.596 | 5.774 | 2.562  |
| DGKG                               | 0.368  | 1.291 | 6.141 | 1.841  |
| DGKH                               | 0.635  | 1.553 | 4.725 | 1.958  |
| DGKI                               | 0.812  | 1.756 | 5.271 | 2.230  |
| DGKK                               | -0.669 | 0.629 | 2.689 | -1.795 |
| DGKZ//DGKZP1                       | 1.011  | 2.015 | 5.549 | 2.947  |
| DHCR24                             | -0.666 | 0.630 | 9.759 | -2.282 |
| DHCR7                              | -0.507 | 0.704 | 6.661 | -1.655 |
| DHH                                | -0.198 | 0.871 | 2.291 | -0.703 |
| DHRS11                             | 0.840  | 1.790 | 4.349 | 2.810  |
| DHRS3                              | -0.423 | 0.746 | 6.141 | -1.342 |
| DHRS4                              | -0.109 | 0.927 | 2.721 | -0.375 |
| DHRS4L1//DHRS4L2                   | 0.276  | 1.211 | 5.397 | 1.052  |
| DHX57                              | 0.328  | 1.255 | 4.873 | 1.369  |
| DIAPH1                             | 0.260  | 1.198 | 5.399 | 1.029  |
| DIEXF                              | 0.125  | 1.090 | 5.146 | 0.562  |
| DIO2                               | 0.865  | 1.822 | 2.101 | 3.307  |
| DIP2A                              | -0.631 | 0.646 | 5.573 | -2.477 |
| DIP2A-IT1                          | -0.662 | 0.632 | 2.360 | -1.874 |
| DIP2B                              | -0.636 | 0.644 | 8.267 | -2.524 |
| DIRAS1                             | 1.208  | 2.311 | 5.748 | 2.731  |
| DIRAS2                             | 1.642  | 3.122 | 6.071 | 3.186  |
| DIRAS3                             | -0.396 | 0.760 | 3.383 | -0.950 |
| DISP2                              | 0.589  | 1.504 | 4.369 | 1.901  |
| DKFZP434I0714//MIR4453//RP11-555K1 | -0.169 | 0.890 | 4.047 | -0.633 |
| DKFZp434J0226//AC006262.6          | -0.433 | 0.741 | 3.326 | -1.381 |
| DKFZP434L187                       | -1.281 | 0.412 | 2.139 | -2.435 |
| DKFZp451B082                       | -0.427 | 0.744 | 2.635 | -1.352 |
| DKFZP586I1420                      | -0.012 | 0.991 | 5.907 | -0.044 |
| DKFZp667F0711                      | -0.174 | 0.886 | 4.629 | -0.333 |
| DKK2                               | 0.057  | 1.040 | 3.923 | 0.199  |
| DLAT                               | 0.252  | 1.191 | 6.716 | 1.236  |
| DLD                                | 0.376  | 1.298 | 6.273 | 1.900  |
| DLEC1                              | -0.216 | 0.861 | 2.683 | -0.717 |
| DLEU2                              | -0.796 | 0.576 | 2.312 | -2.563 |
| DLEU2L                             | 1.078  | 2.111 | 2.962 | 2.971  |

|                           |        |       |       |        |
|---------------------------|--------|-------|-------|--------|
| DLEU7                     | 0.458  | 1.373 | 3.034 | 1.511  |
| DLG2                      | 0.121  | 1.087 | 6.537 | 0.495  |
| DLG3                      | 0.905  | 1.872 | 5.155 | 2.262  |
| DLG4                      | 1.049  | 2.070 | 6.250 | 2.544  |
| DLG5                      | -0.270 | 0.829 | 6.513 | -1.252 |
| DLGAP1                    | 1.463  | 2.756 | 4.612 | 3.227  |
| DLGAP1-AS1                | -0.361 | 0.778 | 4.385 | -1.384 |
| DLGAP1-AS2                | -0.004 | 0.997 | 2.784 | -0.013 |
| DLGAP1-AS3                | 1.006  | 2.008 | 1.809 | 2.804  |
| DLGAP1-AS5                | 0.054  | 1.038 | 2.255 | 0.206  |
| DLGAP2                    | 1.370  | 2.585 | 3.627 | 2.695  |
| DLGAP3                    | 1.178  | 2.262 | 3.580 | 2.187  |
| DLGAP4                    | 0.532  | 1.446 | 6.497 | 1.876  |
| DLL1                      | -0.609 | 0.656 | 4.837 | -2.013 |
| DLL4                      | -0.185 | 0.880 | 4.115 | -0.642 |
| DLX1                      | 0.579  | 1.494 | 2.875 | 1.249  |
| DLX2                      | 0.378  | 1.300 | 1.934 | 1.523  |
| DLX5                      | 0.575  | 1.490 | 2.948 | 1.843  |
| DLX6                      | 0.229  | 1.172 | 2.508 | 0.863  |
| DLX6-AS1                  | 0.867  | 1.824 | 1.860 | 3.139  |
| DMBT1                     | -0.922 | 0.528 | 2.480 | -2.097 |
| DMD                       | 0.159  | 1.116 | 6.258 | 0.806  |
| DMKN                      | 0.309  | 1.239 | 2.613 | 1.192  |
| DMRT2                     | -0.679 | 0.625 | 2.486 | -2.235 |
| DMRTC1//DMRTC1B           | 0.585  | 1.500 | 3.587 | 2.788  |
| DMRTC1B//DMRTC1           | 0.718  | 1.645 | 2.891 | 3.361  |
| DMTN                      | 0.960  | 1.946 | 6.960 | 2.161  |
| DMXL2                     | 0.705  | 1.630 | 7.349 | 2.674  |
| DNA2                      | -0.319 | 0.802 | 3.523 | -1.229 |
| DNAAF1                    | 0.347  | 1.272 | 3.751 | 0.618  |
| DNAH10                    | -0.511 | 0.702 | 2.975 | -1.766 |
| DNAH10OS                  | 0.663  | 1.583 | 4.775 | 2.248  |
| DNAH11                    | -0.396 | 0.760 | 2.265 | -0.723 |
| DNAH17                    | -0.377 | 0.770 | 2.638 | -1.636 |
| DNAH17-AS1//RP11-559N14.5 | -0.865 | 0.549 | 2.457 | -2.356 |
| DNAH2                     | 0.202  | 1.151 | 2.473 | 0.586  |
| DNAH5                     | -0.168 | 0.890 | 2.708 | -0.610 |
| DNAH6                     | 0.569  | 1.484 | 3.371 | 1.716  |
| DNAH7                     | 0.553  | 1.467 | 4.215 | 1.612  |
| DNAH9                     | -0.490 | 0.712 | 3.567 | -1.203 |
| DNAI1                     | 0.115  | 1.083 | 2.735 | 0.374  |
| DNAJA1                    | -0.076 | 0.949 | 8.364 | -0.286 |
| DNAJA2                    | 0.302  | 1.233 | 7.471 | 1.585  |
| DNAJA4                    | -0.002 | 0.999 | 5.626 | -0.007 |
| DNAJB1                    | -0.345 | 0.787 | 7.592 | -0.878 |
| DNAJB14                   | 0.199  | 1.148 | 5.174 | 0.901  |
| DNAJB2                    | -0.672 | 0.628 | 5.161 | -2.879 |
| DNAJC12                   | 0.029  | 1.020 | 6.062 | 0.125  |
| DNAJC19                   | 0.145  | 1.106 | 5.046 | 0.748  |
| DNAJC27                   | 0.024  | 1.017 | 5.034 | 0.110  |

|                       |        |       |       |        |
|-----------------------|--------|-------|-------|--------|
| DNAJC28               | 0.349  | 1.274 | 3.701 | 1.566  |
| DNAJC6                | 0.061  | 1.043 | 9.207 | 0.309  |
| DNAL4                 | 0.235  | 1.177 | 3.740 | 0.966  |
| DNAPTP3               | 0.239  | 1.181 | 2.873 | 0.904  |
| DNASE1                | -0.289 | 0.819 | 3.274 | -1.077 |
| DNASE1L2              | -0.414 | 0.751 | 2.761 | -1.635 |
| DNASE2B               | -0.044 | 0.970 | 2.181 | -0.098 |
| DND1                  | -0.764 | 0.589 | 2.861 | -2.976 |
| DNER                  | -0.664 | 0.631 | 8.651 | -2.805 |
| DNM1                  | 1.341  | 2.534 | 8.136 | 1.902  |
| DNM1L                 | 0.563  | 1.477 | 5.914 | 2.308  |
| DNM1L                 | 0.263  | 1.200 | 3.807 | 0.934  |
| DNM1P35               | 0.250  | 1.189 | 3.129 | 0.745  |
| DNM1P46               | -0.285 | 0.821 | 3.009 | -0.859 |
| DNM2                  | -0.503 | 0.706 | 5.493 | -1.897 |
| DNM3                  | -0.029 | 0.980 | 8.080 | -0.138 |
| DNM3-IT1              | -0.573 | 0.672 | 3.144 | -1.733 |
| DOC2A                 | 1.576  | 2.982 | 5.559 | 2.797  |
| DOC2B                 | 0.500  | 1.414 | 5.776 | 1.332  |
| DOCK1                 | -0.630 | 0.646 | 7.872 | -2.507 |
| DOCK10                | -1.133 | 0.456 | 8.371 | -3.260 |
| DOCK11                | -0.218 | 0.860 | 5.558 | -0.835 |
| DOCK2                 | -0.568 | 0.674 | 5.119 | -1.812 |
| DOCK3                 | 0.509  | 1.423 | 7.275 | 2.191  |
| DOCK5                 | -1.158 | 0.448 | 6.762 | -2.924 |
| DOCK8                 | -1.098 | 0.467 | 4.567 | -2.952 |
| DOK1                  | -0.243 | 0.845 | 2.542 | -1.195 |
| DOK2                  | 0.126  | 1.091 | 2.127 | 0.488  |
| DOK3                  | -0.148 | 0.903 | 2.849 | -0.503 |
| DOK4                  | 0.678  | 1.600 | 4.009 | 2.071  |
| DOK5                  | 0.260  | 1.197 | 5.552 | 1.035  |
| DOK6                  | 1.276  | 2.421 | 6.190 | 1.915  |
| DOPEY2                | 0.679  | 1.601 | 5.133 | 2.729  |
| DPCR1                 | 0.237  | 1.179 | 3.012 | 0.633  |
| DPF1                  | 0.413  | 1.332 | 4.038 | 1.289  |
| DPF3                  | -0.476 | 0.719 | 4.496 | -2.050 |
| DPH6                  | -0.027 | 0.981 | 3.847 | -0.091 |
| DPH6-AS1              | 0.072  | 1.051 | 3.122 | 0.233  |
| DPP10                 | 0.658  | 1.578 | 6.171 | 2.207  |
| DPP10-AS1//AC066593.1 | 0.804  | 1.745 | 4.069 | 2.309  |
| DPP10-AS2//AC068542.2 | 0.083  | 1.059 | 2.581 | 0.271  |
| DPP4                  | 0.505  | 1.419 | 2.607 | 1.656  |
| DPP6                  | 0.392  | 1.312 | 6.984 | 1.409  |
| DPP8                  | 0.324  | 1.252 | 6.069 | 1.619  |
| DPRXP4                | -0.312 | 0.806 | 2.356 | -0.900 |
| DPT                   | 0.373  | 1.295 | 2.786 | 1.323  |
| DPY19L1P1//AC018633.4 | 0.538  | 1.452 | 2.240 | 1.671  |
| DPY19L2P1             | 1.311  | 2.481 | 3.164 | 2.828  |
| DPY19L2P3//AC007276.5 | 0.572  | 1.487 | 2.448 | 2.734  |
| DPY19L2P4             | 0.801  | 1.742 | 2.587 | 2.157  |

|                                   |        |       |       |        |
|-----------------------------------|--------|-------|-------|--------|
| DPYD                              | -0.575 | 0.671 | 6.872 | -1.868 |
| DPYD-IT1                          | -0.995 | 0.502 | 3.652 | -1.823 |
| DPYSL3                            | -0.553 | 0.682 | 7.216 | -2.121 |
| DPYSL5                            | -1.074 | 0.475 | 5.900 | -3.062 |
| DRD1                              | 1.476  | 2.781 | 3.100 | 2.773  |
| DRGX                              | 0.537  | 1.451 | 2.754 | 1.551  |
| DRP2                              | 1.272  | 2.416 | 5.375 | 2.040  |
| DSC2                              | 0.049  | 1.034 | 4.959 | 0.146  |
| DSCAM                             | 0.048  | 1.034 | 5.492 | 0.156  |
| DSEL                              | -0.444 | 0.735 | 6.694 | -1.567 |
| DSN1                              | 0.643  | 1.561 | 3.767 | 2.283  |
| DSP                               | 0.659  | 1.579 | 4.514 | 1.114  |
| DSTYK                             | 0.265  | 1.202 | 6.228 | 1.246  |
| DTHD1                             | -0.524 | 0.695 | 2.077 | -0.930 |
| DTNA                              | 0.001  | 1.001 | 9.309 | 0.004  |
| DTX1                              | 0.164  | 1.120 | 4.871 | 0.684  |
| DTX2                              | -0.550 | 0.683 | 3.280 | -2.353 |
| DTX2P1-UPK3BP1-PMS2P11            | -0.878 | 0.544 | 4.129 | -3.121 |
| DTX3L                             | 0.046  | 1.033 | 5.519 | 0.188  |
| DTX4                              | -0.823 | 0.565 | 6.406 | -2.625 |
| DUOX1                             | -0.468 | 0.723 | 2.271 | -1.552 |
| DUSP1                             | 0.299  | 1.230 | 8.171 | 0.962  |
| DUSP10                            | -0.390 | 0.763 | 5.467 | -1.371 |
| DUSP14                            | 0.043  | 1.030 | 5.378 | 0.140  |
| DUSP15//C20orf57                  | -0.280 | 0.823 | 3.665 | -1.067 |
| DUSP16                            | -0.634 | 0.645 | 5.587 | -2.536 |
| DUSP19                            | 0.825  | 1.772 | 4.388 | 2.181  |
| DUSP2                             | 0.408  | 1.327 | 4.238 | 1.410  |
| DUSP26                            | 0.214  | 1.160 | 6.497 | 0.988  |
| DUSP3                             | 0.330  | 1.257 | 6.088 | 1.421  |
| DUSP5                             | 0.199  | 1.148 | 2.950 | 0.687  |
| DUSP7                             | -0.366 | 0.776 | 4.676 | -1.777 |
| DUSP8//LOC101927562               | 0.706  | 1.631 | 4.654 | 2.103  |
| DUXAP10                           | 0.366  | 1.289 | 4.910 | 1.019  |
| DUXAP10//LOC100507460//CTD-2314B: | 0.438  | 1.355 | 3.916 | 1.090  |
| DYNC1I1                           | 0.307  | 1.237 | 7.408 | 1.218  |
| DYNC1LI1                          | 0.430  | 1.348 | 5.449 | 2.095  |
| DYNLL1-AS1                        | -0.051 | 0.965 | 4.324 | -0.188 |
| DYNLRB2                           | -0.609 | 0.655 | 2.638 | -2.671 |
| DYNLT1                            | -0.203 | 0.868 | 5.165 | -0.856 |
| DYNLT3                            | 0.467  | 1.382 | 6.913 | 1.857  |
| DZIP1                             | 0.477  | 1.392 | 6.645 | 1.924  |
| DZIP3                             | 0.419  | 1.337 | 7.301 | 1.990  |
| E2F3                              | 0.375  | 1.297 | 3.671 | 1.546  |
| EBF1                              | -0.184 | 0.880 | 3.800 | -0.503 |
| EBF2                              | -0.010 | 0.993 | 2.604 | -0.031 |
| EBF3                              | -0.818 | 0.567 | 3.085 | -1.305 |
| EBI3                              | -0.400 | 0.758 | 2.855 | -1.113 |
| EBLN2                             | -0.519 | 0.698 | 3.915 | -1.600 |
| EBLN3//RP11-220I1.1               | 0.335  | 1.261 | 7.065 | 1.435  |



|                                    |        |       |       |        |
|------------------------------------|--------|-------|-------|--------|
| ECD//RP11-152N13.3                 | 0.048  | 1.034 | 6.929 | 0.211  |
| ECE1                               | -0.152 | 0.900 | 6.121 | -0.691 |
| ECEL1                              | -0.941 | 0.521 | 3.221 | -1.950 |
| ECHDC3                             | 0.170  | 1.125 | 3.108 | 0.561  |
| ECM2                               | -0.323 | 0.799 | 3.931 | -0.828 |
| ECRP                               | 0.044  | 1.031 | 4.994 | 0.049  |
| ECSCR                              | -0.130 | 0.914 | 4.935 | -0.373 |
| ECT2                               | 0.690  | 1.613 | 4.277 | 2.849  |
| EDA2R                              | -0.901 | 0.536 | 4.269 | -2.037 |
| EDIL3                              | -0.771 | 0.586 | 9.316 | -2.770 |
| EDN1                               | 0.362  | 1.285 | 6.437 | 0.775  |
| EDN3                               | -0.403 | 0.756 | 3.624 | -1.346 |
| EDNRA                              | 0.308  | 1.238 | 3.996 | 0.957  |
| EDNRB                              | -0.194 | 0.874 | 7.814 | -0.449 |
| EEF1A2                             | 0.911  | 1.880 | 7.312 | 1.907  |
| EEF1D//RP11-661A12.7               | 0.006  | 1.004 | 3.568 | 0.020  |
| EEF1DP3                            | 0.106  | 1.076 | 3.290 | 0.429  |
| EEF1G//MIR3654//EEF1GP1//RP11-864I | -0.154 | 0.899 | 8.629 | -0.777 |
| EEPD1                              | -0.437 | 0.739 | 5.276 | -1.581 |
| EFCAB1                             | 0.063  | 1.044 | 2.608 | 0.159  |
| EFCAB12                            | 0.454  | 1.370 | 2.433 | 0.983  |
| EFCAB6                             | 0.444  | 1.360 | 3.884 | 2.381  |
| EFCAB7                             | 0.361  | 1.285 | 4.317 | 1.369  |
| EFEMP1                             | -0.351 | 0.784 | 8.494 | -1.108 |
| EFEMP2                             | -0.090 | 0.940 | 4.920 | -0.420 |
| EFHB                               | -0.175 | 0.886 | 2.525 | -0.514 |
| EFHC2                              | 0.608  | 1.524 | 3.543 | 2.076  |
| EFHD1                              | -1.037 | 0.487 | 4.847 | -3.375 |
| EFHD2                              | 0.607  | 1.523 | 5.699 | 2.360  |
| EFNA1                              | -0.394 | 0.761 | 4.837 | -1.073 |
| EFNA2                              | 0.379  | 1.300 | 3.090 | 1.371  |
| EFNA3//RP11-540D14.8               | 0.805  | 1.747 | 4.749 | 1.854  |
| EFNA5                              | 1.097  | 2.140 | 4.388 | 2.507  |
| EFNB2                              | 0.886  | 1.848 | 4.676 | 2.008  |
| EFNB3                              | 1.068  | 2.097 | 4.474 | 1.965  |
| EFR3A                              | 0.862  | 1.818 | 7.567 | 3.040  |
| EFR3B                              | 0.071  | 1.050 | 7.036 | 0.298  |
| EFS                                | -0.877 | 0.544 | 5.187 | -2.407 |
| EGF                                | 0.079  | 1.057 | 3.030 | 0.357  |
| EGFEM1P                            | 0.464  | 1.380 | 3.097 | 1.489  |
| EGFR                               | -0.041 | 0.972 | 5.759 | -0.130 |
| EGR1                               | 0.167  | 1.123 | 5.072 | 0.507  |
| EGR3                               | 0.851  | 1.804 | 3.614 | 2.149  |
| EGR4                               | -0.104 | 0.930 | 2.317 | -0.382 |
| EHBP1                              | 0.560  | 1.474 | 6.461 | 2.353  |
| EHBP1L1                            | -0.446 | 0.734 | 3.598 | -1.633 |
| EHD2                               | 0.141  | 1.103 | 5.673 | 0.608  |
| EHD3                               | 0.833  | 1.782 | 6.120 | 2.245  |
| EHD4                               | -0.080 | 0.946 | 4.978 | -0.299 |
| EHF                                | -0.385 | 0.766 | 3.794 | -1.105 |

|                                  |        |       |       |        |
|----------------------------------|--------|-------|-------|--------|
| EID2                             | 0.618  | 1.534 | 4.379 | 2.567  |
| EID2B                            | 0.699  | 1.623 | 3.346 | 2.518  |
| EIF1AD                           | 0.132  | 1.096 | 5.588 | 0.697  |
| EIF1AY                           | -0.001 | 0.999 | 3.558 | -0.002 |
| EIF4A2//SNORA63//SNORD2//SNORA4/ | 0.174  | 1.128 | 7.665 | 0.918  |
| EIF4B                            | -0.103 | 0.931 | 5.487 | -0.281 |
| EIF4E1B                          | 0.464  | 1.379 | 2.895 | 2.006  |
| EIF4EBP1                         | -0.192 | 0.875 | 4.449 | -0.535 |
| EIF5A2                           | 0.539  | 1.453 | 5.429 | 1.725  |
| ELAVL2                           | 0.934  | 1.911 | 6.245 | 1.568  |
| ELAVL4                           | 1.007  | 2.009 | 4.566 | 1.991  |
| ELF1                             | -0.595 | 0.662 | 7.982 | -2.485 |
| ELF4                             | -0.281 | 0.823 | 2.555 | -0.906 |
| ELFN1                            | 0.373  | 1.295 | 4.211 | 1.270  |
| ELFN2//RP1-63G5.5                | 0.586  | 1.501 | 3.290 | 2.744  |
| ELK1                             | 0.647  | 1.566 | 4.738 | 1.680  |
| ELK3                             | -0.195 | 0.874 | 4.434 | -0.738 |
| ELL2                             | -0.043 | 0.971 | 8.446 | -0.153 |
| ELMO1                            | -0.987 | 0.505 | 7.368 | -2.879 |
| ELMOD1//LOC643923                | 1.009  | 2.013 | 6.772 | 1.963  |
| ELMOD1//LOC643923                | 0.346  | 1.271 | 3.605 | 1.233  |
| ELN                              | -0.011 | 0.992 | 3.046 | -0.046 |
| ELOVL1//MIR6734                  | -1.294 | 0.408 | 7.016 | -2.954 |
| ELOVL2                           | -0.043 | 0.970 | 7.062 | -0.159 |
| ELOVL4                           | 0.903  | 1.869 | 6.143 | 1.871  |
| ELOVL5                           | -0.231 | 0.852 | 6.838 | -0.812 |
| ELP5                             | 0.054  | 1.038 | 5.648 | 0.248  |
| EMBP1                            | -0.018 | 0.988 | 3.068 | -0.063 |
| EMC10                            | -0.437 | 0.739 | 6.873 | -1.964 |
| EMC3-AS1//AC034193.5             | 0.118  | 1.085 | 3.586 | 0.353  |
| EMD                              | -0.042 | 0.971 | 6.304 | -0.158 |
| EMID1                            | -0.068 | 0.954 | 3.835 | -0.263 |
| EMILIN1                          | -0.205 | 0.868 | 3.438 | -0.745 |
| EMILIN2                          | -0.762 | 0.590 | 5.541 | -1.595 |
| EMILIN3                          | 0.008  | 1.005 | 3.455 | 0.027  |
| EML1                             | -0.399 | 0.758 | 5.550 | -1.687 |
| EML3                             | -0.243 | 0.845 | 5.231 | -1.147 |
| EML5                             | 0.549  | 1.463 | 4.429 | 2.203  |
| EML6                             | 0.649  | 1.568 | 4.747 | 2.217  |
| EMP1                             | 0.453  | 1.369 | 5.950 | 1.097  |
| EMP2                             | -0.248 | 0.842 | 4.731 | -1.078 |
| EMP3                             | -0.094 | 0.937 | 7.612 | -0.315 |
| EMR1                             | 0.182  | 1.134 | 2.000 | 0.447  |
| EMR4P                            | -0.692 | 0.619 | 2.155 | -1.597 |
| EMX1                             | 0.387  | 1.307 | 2.445 | 1.286  |
| EMX2                             | 1.189  | 2.280 | 4.314 | 2.229  |
| EMX2OS                           | 0.756  | 1.688 | 3.143 | 1.856  |
| ENC1                             | 1.929  | 3.808 | 4.411 | 2.765  |
| ENDOD1                           | -0.349 | 0.785 | 7.143 | -1.268 |
| ENG                              | 0.470  | 1.385 | 6.038 | 1.729  |

|                |        |       |       |        |
|----------------|--------|-------|-------|--------|
| ENHO           | -0.119 | 0.921 | 4.908 | -0.281 |
| ENKUR          | -0.186 | 0.879 | 4.700 | -0.632 |
| ENO1           | 0.097  | 1.069 | 5.422 | 0.389  |
| ENO1-IT1       | -0.259 | 0.835 | 2.343 | -1.034 |
| ENO2           | 0.632  | 1.550 | 4.513 | 2.325  |
| ENO4           | 0.064  | 1.046 | 3.227 | 0.227  |
| ENOSF1         | -1.291 | 0.409 | 5.737 | -3.404 |
| ENPP1          | -0.236 | 0.849 | 3.695 | -0.705 |
| ENPP2          | -1.046 | 0.484 | 9.718 | -2.648 |
| ENPP2          | -0.907 | 0.533 | 5.609 | -1.539 |
| ENPP4          | -0.177 | 0.885 | 7.604 | -0.638 |
| ENPP5          | 0.360  | 1.283 | 6.269 | 1.242  |
| ENPP6          | -1.322 | 0.400 | 6.213 | -2.522 |
| ENTPD1         | -0.498 | 0.708 | 3.650 | -2.199 |
| ENTPD2         | -0.026 | 0.982 | 4.306 | -0.093 |
| ENTPD3         | 0.824  | 1.770 | 4.532 | 1.557  |
| ENTPD3-AS1     | -0.696 | 0.617 | 2.964 | -2.699 |
| ENTPD4         | -0.422 | 0.746 | 3.330 | -1.460 |
| ENTPD5         | -0.271 | 0.828 | 3.804 | -1.065 |
| ENTPD6         | 0.570  | 1.485 | 6.102 | 2.181  |
| ENTPD7         | 0.411  | 1.329 | 4.060 | 1.689  |
| EPB41L4B       | 0.904  | 1.872 | 6.009 | 2.130  |
| EPC1//IGHV3-33 | -0.527 | 0.694 | 2.236 | -1.479 |
| EPCAM          | -0.280 | 0.823 | 3.570 | -0.897 |
| EPDR1          | 0.499  | 1.413 | 6.929 | 1.624  |
| EPHA10         | 0.435  | 1.352 | 2.264 | 1.768  |
| EPHA2          | -0.032 | 0.978 | 3.381 | -0.132 |
| EPHA3          | 0.562  | 1.476 | 4.300 | 2.031  |
| EPHA4          | 1.445  | 2.723 | 5.834 | 2.626  |
| EPHA5          | 0.464  | 1.380 | 5.755 | 1.368  |
| EPHA6          | 0.596  | 1.511 | 2.182 | 1.815  |
| EPHA7          | 0.967  | 1.955 | 4.903 | 2.314  |
| EPHB1          | 0.405  | 1.324 | 3.979 | 1.652  |
| EPHB6          | 1.966  | 3.907 | 5.178 | 3.684  |
| EPHX1          | -0.382 | 0.767 | 6.585 | -1.518 |
| EPHX2          | -0.301 | 0.812 | 3.879 | -1.157 |
| EPHX4          | 1.345  | 2.541 | 4.051 | 2.702  |
| EPN2-IT1//EPN2 | -0.657 | 0.634 | 3.569 | -2.172 |
| EPN3           | 0.521  | 1.435 | 3.485 | 1.875  |
| EPS8           | -0.414 | 0.751 | 6.173 | -1.689 |
| EPS8L2         | 0.087  | 1.062 | 3.525 | 0.359  |
| EPSTI1         | -0.194 | 0.874 | 3.419 | -0.748 |
| EPT1           | 0.295  | 1.227 | 6.793 | 1.152  |
| ERAP1          | -0.199 | 0.871 | 5.564 | -0.676 |
| ERAP2          | -0.167 | 0.890 | 2.522 | -0.484 |
| ERBB2          | -0.431 | 0.742 | 5.157 | -1.870 |
| ERBB2IP        | -0.362 | 0.778 | 8.312 | -1.413 |
| ERBB3          | -1.328 | 0.398 | 5.572 | -2.906 |
| ERBB4          | 0.062  | 1.044 | 7.111 | 0.261  |
| ERC2           | 1.063  | 2.089 | 5.035 | 2.644  |

|                      |        |       |       |        |
|----------------------|--------|-------|-------|--------|
| ERC2-IT1             | 0.519  | 1.433 | 2.352 | 1.913  |
| ERF                  | -0.532 | 0.691 | 3.907 | -2.113 |
| ERI2                 | -0.200 | 0.870 | 4.143 | -0.664 |
| ERICH3//C1orf173     | 1.274  | 2.419 | 4.078 | 2.365  |
| ERLEC1               | 0.370  | 1.293 | 7.188 | 1.765  |
| ERMAP                | -0.172 | 0.888 | 3.651 | -0.866 |
| ERMARD//C6orf70      | -0.089 | 0.940 | 5.524 | -0.315 |
| ERMN                 | -1.062 | 0.479 | 8.472 | -2.621 |
| ERO1L                | 0.369  | 1.291 | 5.659 | 1.279  |
| ESPNP                | 0.144  | 1.105 | 2.675 | 0.442  |
| ESRRG                | 0.156  | 1.114 | 4.106 | 0.463  |
| ESYT3                | 0.690  | 1.613 | 3.808 | 2.079  |
| ETAA1                | 0.322  | 1.250 | 3.745 | 1.404  |
| ETNPPL               | -0.503 | 0.706 | 7.691 | -1.217 |
| ETS2                 | 0.337  | 1.263 | 7.769 | 1.310  |
| ETV1                 | 0.611  | 1.528 | 4.323 | 2.631  |
| ETV6//INO80D         | 0.156  | 1.115 | 6.444 | 0.663  |
| EVI2A                | -1.005 | 0.498 | 4.069 | -2.254 |
| EVI2B//CTD-2370N5.3  | -0.684 | 0.622 | 3.972 | -2.044 |
| EXOC6                | 0.578  | 1.493 | 5.144 | 2.139  |
| EXOC8                | 0.339  | 1.264 | 5.721 | 1.409  |
| EXOSC3               | -0.162 | 0.894 | 5.896 | -0.806 |
| EXOSC5               | -0.017 | 0.988 | 5.998 | -0.059 |
| EXOSC6               | 0.388  | 1.309 | 6.264 | 1.662  |
| EXTL1                | 0.901  | 1.868 | 3.162 | 2.531  |
| EXTL2                | 0.402  | 1.321 | 4.777 | 1.641  |
| EYA1                 | 0.211  | 1.157 | 4.356 | 0.702  |
| EYA2                 | -0.360 | 0.779 | 5.225 | -1.269 |
| EYA4                 | -0.983 | 0.506 | 4.244 | -3.510 |
| F11R//RP11-544M22.13 | -0.129 | 0.915 | 4.891 | -0.425 |
| F13A1                | 0.751  | 1.684 | 5.968 | 1.366  |
| F2R                  | 0.067  | 1.047 | 4.018 | 0.250  |
| F2RL2                | -0.698 | 0.616 | 2.673 | -1.522 |
| F3                   | 1.121  | 2.175 | 7.890 | 2.949  |
| F5                   | -0.432 | 0.741 | 4.374 | -0.939 |
| F7                   | 0.286  | 1.219 | 2.350 | 1.016  |
| F8A1//F8A2//F8A3     | 0.468  | 1.383 | 8.091 | 1.540  |
| F8A1//F8A2//F8A3     | 0.144  | 1.105 | 7.733 | 0.720  |
| FA2H                 | -1.552 | 0.341 | 7.133 | -3.132 |
| FAAH                 | -0.476 | 0.719 | 5.271 | -1.797 |
| FABP3                | 0.659  | 1.579 | 6.589 | 1.456  |
| FABP6                | 0.200  | 1.149 | 4.474 | 0.631  |
| FABP7                | 0.227  | 1.170 | 5.562 | 0.780  |
| FADS2                | -0.344 | 0.788 | 4.477 | -1.409 |
| FADS6                | 0.235  | 1.177 | 2.618 | 0.751  |
| FAH                  | -0.084 | 0.943 | 4.061 | -0.367 |
| FAHD2CP              | -0.607 | 0.657 | 6.766 | -1.705 |
| FAIM2                | 0.240  | 1.181 | 7.240 | 1.195  |
| FAM101B              | 0.354  | 1.278 | 5.261 | 1.288  |
| FAM102B              | 0.968  | 1.956 | 6.427 | 2.974  |

|                                |        |       |       |        |
|--------------------------------|--------|-------|-------|--------|
| FAM105A                        | -0.265 | 0.832 | 4.975 | -0.888 |
| FAM106A//FAM106CP              | -0.430 | 0.742 | 2.803 | -1.661 |
| FAM106CP                       | -0.337 | 0.792 | 6.211 | -0.869 |
| FAM107A                        | 0.064  | 1.045 | 4.417 | 0.227  |
| FAM110C                        | 0.338  | 1.264 | 3.336 | 1.051  |
| FAM111A                        | -0.431 | 0.742 | 3.549 | -1.790 |
| FAM114A1                       | -0.309 | 0.807 | 5.426 | -1.382 |
| FAM115A//LOC100294033          | 0.529  | 1.443 | 6.219 | 2.233  |
| FAM115C//LOC101928422          | 0.261  | 1.198 | 3.340 | 0.951  |
| FAM117B                        | 0.287  | 1.221 | 7.380 | 1.116  |
| FAM118A                        | -0.464 | 0.725 | 3.047 | -1.734 |
| FAM124A                        | -0.628 | 0.647 | 4.057 | -1.928 |
| FAM126B                        | 0.763  | 1.697 | 5.747 | 2.879  |
| FAM127B                        | -0.073 | 0.951 | 4.800 | -0.236 |
| FAM129A                        | 0.130  | 1.095 | 5.227 | 0.378  |
| FAM129B                        | -0.092 | 0.938 | 5.993 | -0.392 |
| FAM131A                        | 0.465  | 1.380 | 4.416 | 1.944  |
| FAM133A                        | 0.249  | 1.188 | 4.086 | 0.836  |
| FAM135B                        | 0.545  | 1.459 | 5.215 | 1.898  |
| FAM13A                         | 0.396  | 1.315 | 5.441 | 1.707  |
| FAM13A-AS1                     | -0.351 | 0.784 | 4.062 | -1.275 |
| FAM153A//FAM153B//LOC100507387 | 0.900  | 1.866 | 3.954 | 1.974  |
| FAM154B                        | 0.015  | 1.011 | 2.651 | 0.055  |
| FAM155A                        | 0.648  | 1.567 | 5.721 | 1.711  |
| FAM155A-IT1                    | -0.028 | 0.981 | 5.056 | -0.074 |
| FAM160B1                       | 0.388  | 1.309 | 6.071 | 1.829  |
| FAM162B                        | 1.270  | 2.411 | 4.538 | 3.239  |
| FAM163A                        | 0.174  | 1.128 | 2.432 | 0.580  |
| FAM163B                        | 1.646  | 3.129 | 5.323 | 2.908  |
| FAM163B                        | 0.478  | 1.392 | 3.140 | 1.392  |
| FAM169A                        | 0.226  | 1.169 | 7.175 | 1.083  |
| FAM171A2                       | 0.916  | 1.887 | 5.685 | 2.593  |
| FAM171B                        | 0.445  | 1.361 | 9.006 | 1.847  |
| FAM177B                        | -0.118 | 0.922 | 2.933 | -0.380 |
| FAM178A                        | -0.694 | 0.618 | 5.746 | -2.790 |
| FAM178B                        | -0.099 | 0.934 | 2.905 | -0.431 |
| FAM179A                        | 0.074  | 1.052 | 2.957 | 0.243  |
| FAM179B                        | 0.111  | 1.080 | 6.405 | 0.489  |
| FAM181A-AS1                    | -0.113 | 0.925 | 2.790 | -0.385 |
| FAM181B                        | -0.272 | 0.828 | 3.224 | -1.009 |
| FAM184A                        | 0.588  | 1.503 | 5.031 | 2.619  |
| FAM189A1                       | 0.772  | 1.707 | 4.370 | 2.735  |
| FAM189A2                       | -0.330 | 0.796 | 7.379 | -0.822 |
| FAM196A                        | -0.214 | 0.862 | 3.099 | -0.749 |
| FAM196B                        | -0.693 | 0.619 | 5.408 | -2.714 |
| FAM198A//KRBOX1                | -0.194 | 0.874 | 4.507 | -0.718 |
| FAM198B                        | -0.037 | 0.975 | 4.883 | -0.147 |
| FAM19A1                        | 1.025  | 2.035 | 2.407 | 2.982  |
| FAM19A2                        | 0.752  | 1.684 | 2.466 | 2.402  |
| FAM19A4                        | -0.774 | 0.585 | 3.623 | -2.487 |

|                                  |        |       |       |        |
|----------------------------------|--------|-------|-------|--------|
| FAM200A                          | -0.430 | 0.742 | 4.312 | -2.190 |
| FAM200B                          | 0.053  | 1.037 | 5.052 | 0.237  |
| FAM20A                           | 0.073  | 1.052 | 3.325 | 0.256  |
| FAM20B                           | 0.411  | 1.329 | 6.762 | 1.840  |
| FAM20C                           | -0.058 | 0.960 | 5.645 | -0.181 |
| FAM212B//LOC101928718            | 0.699  | 1.623 | 3.566 | 1.742  |
| FAM213B                          | 0.495  | 1.409 | 4.680 | 1.979  |
| FAM215A                          | -0.298 | 0.813 | 3.102 | -0.845 |
| FAM216A                          | 0.406  | 1.325 | 4.596 | 1.745  |
| FAM216B                          | -0.247 | 0.842 | 2.366 | -0.411 |
| FAM217B                          | 0.517  | 1.431 | 6.199 | 2.305  |
| FAM218A                          | -0.461 | 0.726 | 4.612 | -1.813 |
| FAM220A//FAM220BP//FAM220CP      | 0.272  | 1.208 | 5.945 | 1.103  |
| FAM221A                          | 0.083  | 1.059 | 4.132 | 0.292  |
| FAM222A                          | -0.965 | 0.512 | 3.861 | -2.623 |
| FAM224A//FAM224B                 | 0.209  | 1.156 | 2.561 | 0.782  |
| FAM225A//FAM225B                 | -0.898 | 0.536 | 4.109 | -2.704 |
| FAM225B                          | -0.229 | 0.853 | 2.502 | -0.615 |
| FAM226B//FAM226A//RP1-172N19.5   | 0.183  | 1.136 | 3.085 | 0.682  |
| FAM227A                          | -0.158 | 0.896 | 3.750 | -0.437 |
| FAM228A//RP11-507M3.1            | 0.753  | 1.685 | 4.479 | 2.495  |
| FAM231D//FAM231B//LOC100996721// | 0.783  | 1.720 | 2.555 | 1.797  |
| FAM26E                           | -0.171 | 0.888 | 2.921 | -0.450 |
| FAM26F                           | 0.029  | 1.021 | 3.011 | 0.095  |
| FAM27C//FAM27B//FAM182B          | 0.801  | 1.743 | 3.050 | 3.052  |
| FAM27E2//FAM27E3//FAM27E4P       | -0.510 | 0.702 | 4.939 | -1.313 |
| FAM43A                           | -0.193 | 0.875 | 4.136 | -0.620 |
| FAM46A                           | -0.215 | 0.862 | 3.381 | -0.970 |
| FAM46B                           | -0.062 | 0.958 | 2.252 | -0.236 |
| FAM46C                           | -0.132 | 0.913 | 4.290 | -0.331 |
| FAM49A                           | 0.942  | 1.921 | 7.030 | 3.164  |
| FAM57B//LOC100996332             | 0.504  | 1.418 | 4.739 | 1.446  |
| FAM63A                           | -1.029 | 0.490 | 5.634 | -3.018 |
| FAM65B                           | 0.838  | 1.788 | 5.385 | 2.325  |
| FAM66A                           | -0.078 | 0.947 | 3.931 | -0.135 |
| FAM66B                           | 0.249  | 1.189 | 4.247 | 0.675  |
| FAM66E                           | 0.143  | 1.104 | 3.351 | 0.388  |
| FAM69B                           | 0.686  | 1.609 | 5.793 | 2.358  |
| FAM69C                           | -0.278 | 0.825 | 4.026 | -0.932 |
| FAM76B                           | 0.013  | 1.009 | 4.263 | 0.045  |
| FAM78B                           | 0.354  | 1.278 | 4.055 | 0.954  |
| FAM81A                           | 1.283  | 2.433 | 4.439 | 3.651  |
| FAM83D                           | 0.687  | 1.610 | 2.302 | 1.686  |
| FAM83H                           | 0.303  | 1.234 | 2.502 | 0.997  |
| FAM84A                           | 1.066  | 2.094 | 4.905 | 2.555  |
| FAM84B                           | -0.338 | 0.791 | 4.607 | -1.240 |
| FAM86A//FAM86B2//FAM86KP         | -0.217 | 0.861 | 3.975 | -0.838 |
| FAM86B3P                         | 0.127  | 1.092 | 2.435 | 0.482  |
| FAM86C2P                         | -0.013 | 0.991 | 2.557 | -0.046 |
| FAM86DP                          | 0.236  | 1.178 | 4.674 | 0.869  |

|                            |        |       |       |        |
|----------------------------|--------|-------|-------|--------|
| FAM86EP                    | 0.146  | 1.106 | 3.691 | 0.500  |
| FAM86HP                    | 0.578  | 1.493 | 3.051 | 1.353  |
| FAM89A//MIR1182            | 0.052  | 1.037 | 4.781 | 0.253  |
| FAM89B//SSSCA1             | 0.247  | 1.187 | 6.915 | 0.985  |
| FAM90A1                    | -0.425 | 0.745 | 2.341 | -1.245 |
| FAM90A10P                  | -0.012 | 0.992 | 3.933 | -0.045 |
| FAM99A                     | 0.135  | 1.098 | 2.930 | 0.484  |
| FAM99B                     | -0.768 | 0.587 | 3.075 | -2.647 |
| FANCA                      | 0.084  | 1.060 | 2.509 | 0.288  |
| FANCL                      | -0.493 | 0.710 | 5.341 | -1.742 |
| FANCM                      | -0.056 | 0.962 | 2.615 | -0.211 |
| FANK1                      | 0.227  | 1.170 | 2.879 | 0.781  |
| FAP                        | -0.112 | 0.925 | 2.978 | -0.419 |
| FAR1                       | -0.495 | 0.710 | 7.840 | -1.894 |
| FAR1-IT1                   | -0.511 | 0.702 | 3.678 | -1.424 |
| FAR2                       | 1.012  | 2.017 | 4.619 | 2.976  |
| FAR2P2//FAR2P3//AC140481.1 | -0.259 | 0.835 | 5.069 | -0.944 |
| FAR2P2//FAR2P3//AC140481.1 | -0.165 | 0.892 | 4.664 | -0.609 |
| FARSB                      | 0.346  | 1.271 | 7.150 | 1.443  |
| FAS                        | -0.014 | 0.990 | 4.831 | -0.036 |
| FASTKD1                    | 0.107  | 1.077 | 5.175 | 0.569  |
| FASTKD2                    | 0.368  | 1.291 | 4.982 | 1.622  |
| FAT1                       | -0.557 | 0.680 | 6.981 | -2.243 |
| FAT3                       | 0.653  | 1.573 | 6.218 | 1.849  |
| FAT4                       | -0.565 | 0.676 | 5.675 | -2.084 |
| FATE1                      | 0.534  | 1.448 | 1.870 | 1.740  |
| FAXC                       | 0.959  | 1.945 | 5.316 | 2.044  |
| FAXDC2                     | -0.763 | 0.589 | 5.001 | -2.096 |
| FBLL1                      | 0.801  | 1.743 | 4.843 | 1.968  |
| FBLN1                      | -0.046 | 0.969 | 4.907 | -0.188 |
| FBLN2                      | 0.150  | 1.109 | 4.077 | 0.574  |
| FBLN5                      | 0.092  | 1.066 | 5.328 | 0.393  |
| FBLN7                      | 0.650  | 1.569 | 2.673 | 2.164  |
| FBP1                       | -0.179 | 0.883 | 3.292 | -0.576 |
| FBXL14                     | 0.314  | 1.243 | 6.063 | 1.470  |
| FBXL15                     | 0.518  | 1.432 | 3.092 | 2.160  |
| FBXL16                     | 1.504  | 2.837 | 6.649 | 2.585  |
| FBXL17                     | 0.472  | 1.387 | 6.443 | 2.012  |
| FBXL18                     | 0.277  | 1.212 | 3.362 | 0.907  |
| FBXL19                     | 0.589  | 1.504 | 4.151 | 1.852  |
| FBXL2                      | 0.541  | 1.455 | 5.231 | 1.968  |
| FBXL20                     | 0.333  | 1.260 | 6.684 | 1.641  |
| FBXL7                      | -0.586 | 0.666 | 6.444 | -2.589 |
| FBXO15                     | -0.540 | 0.688 | 3.400 | -1.703 |
| FBXO16//ZNF395             | 0.536  | 1.450 | 5.035 | 1.702  |
| FBXO2                      | 0.026  | 1.018 | 5.683 | 0.111  |
| FBXO27                     | 0.286  | 1.219 | 4.530 | 1.117  |
| FBXO27                     | 0.069  | 1.049 | 5.198 | 0.265  |
| FBXO28                     | 0.137  | 1.100 | 6.160 | 0.695  |
| FBXO3                      | 0.274  | 1.209 | 5.832 | 1.312  |

|                                    |        |       |       |        |
|------------------------------------|--------|-------|-------|--------|
| FBXO31                             | 0.318  | 1.246 | 6.202 | 1.303  |
| FBXO32                             | -0.592 | 0.663 | 7.725 | -2.115 |
| FBXO33                             | 0.548  | 1.462 | 5.509 | 1.879  |
| FBXO34                             | 0.820  | 1.765 | 4.828 | 2.428  |
| FBXO40                             | 0.849  | 1.801 | 2.485 | 2.249  |
| FBXO41//LOC101927826               | 1.167  | 2.246 | 4.657 | 2.899  |
| FBXO44                             | 0.383  | 1.304 | 4.743 | 1.522  |
| FBXO45                             | 0.196  | 1.145 | 4.897 | 0.863  |
| FBXO48                             | 0.033  | 1.023 | 4.015 | 0.133  |
| FBXO7                              | -0.508 | 0.703 | 7.841 | -2.095 |
| FBXO9                              | 0.203  | 1.151 | 5.250 | 0.845  |
| FBXW7                              | 1.071  | 2.100 | 7.079 | 2.674  |
| FBXW9                              | 0.352  | 1.277 | 2.539 | 1.137  |
| FCAR                               | 0.087  | 1.062 | 3.177 | 0.233  |
| FCER1G                             | -0.075 | 0.949 | 7.262 | -0.128 |
| FCGBP                              | 0.182  | 1.135 | 3.697 | 0.292  |
| FCGR1A//FCGR1B                     | -0.243 | 0.845 | 5.193 | -0.443 |
| FCGR1B                             | -0.422 | 0.746 | 3.905 | -1.361 |
| FCGR2A                             | -0.256 | 0.838 | 3.953 | -0.660 |
| FCGR2B                             | -0.087 | 0.941 | 2.285 | -0.210 |
| FCGRT                              | -0.441 | 0.737 | 4.487 | -1.986 |
| FCN1                               | -0.044 | 0.970 | 2.848 | -0.155 |
| FDFT1                              | -0.389 | 0.764 | 5.673 | -1.422 |
| FDX1L                              | 0.401  | 1.320 | 2.953 | 1.722  |
| FEM1B                              | 0.221  | 1.166 | 7.289 | 1.076  |
| FERMT1                             | -0.633 | 0.645 | 4.397 | -1.843 |
| FERMT3                             | -0.311 | 0.806 | 4.254 | -0.942 |
| FEZF2                              | 1.655  | 3.150 | 3.553 | 3.039  |
| FFAR3                              | 0.374  | 1.296 | 2.460 | 1.020  |
| FFAR4                              | 0.487  | 1.401 | 2.761 | 1.079  |
| FGD1                               | 0.526  | 1.440 | 4.352 | 2.062  |
| FGD2                               | -0.799 | 0.575 | 3.832 | -2.762 |
| FGD3                               | -0.425 | 0.745 | 2.647 | -1.420 |
| FGD5                               | 0.422  | 1.340 | 3.321 | 1.735  |
| FGD6                               | 0.414  | 1.332 | 5.385 | 1.542  |
| FGF1                               | -0.789 | 0.579 | 4.146 | -2.562 |
| FGF10                              | 0.269  | 1.205 | 3.309 | 0.814  |
| FGF11//RP11-104H15.7//RP11-104H15. | -0.419 | 0.748 | 4.889 | -1.392 |
| FGF12                              | 0.916  | 1.887 | 4.285 | 1.815  |
| FGF13                              | 0.873  | 1.832 | 3.866 | 2.220  |
| FGF14                              | 1.294  | 2.452 | 5.815 | 2.652  |
| FGF14-AS2//RP11-811P12.4           | -0.346 | 0.787 | 3.397 | -1.059 |
| FGF14-IT1                          | 0.449  | 1.365 | 4.271 | 1.224  |
| FGF17                              | -0.008 | 0.995 | 3.110 | -0.027 |
| FGF18                              | 0.470  | 1.385 | 2.817 | 1.956  |
| FGF5                               | 0.534  | 1.448 | 2.730 | 2.010  |
| FGF7                               | -0.127 | 0.916 | 2.125 | -0.334 |
| FGF9                               | 1.057  | 2.081 | 4.162 | 2.137  |
| FGFBP2                             | -0.011 | 0.993 | 2.275 | -0.029 |
| FGFR1                              | -0.369 | 0.775 | 4.013 | -2.048 |



|                                    |        |       |       |        |
|------------------------------------|--------|-------|-------|--------|
| FGFR1OP2                           | -0.297 | 0.814 | 5.261 | -0.900 |
| FGFR2                              | -0.693 | 0.619 | 7.082 | -2.114 |
| FGFR3                              | -0.123 | 0.918 | 6.562 | -0.374 |
| FGL2                               | 0.021  | 1.014 | 6.548 | 0.056  |
| FGR                                | -0.129 | 0.915 | 3.546 | -0.572 |
| FH                                 | 0.334  | 1.260 | 5.983 | 1.487  |
| FHDC1                              | 0.077  | 1.055 | 2.586 | 0.264  |
| FHL2                               | 0.698  | 1.622 | 3.244 | 2.022  |
| FHL3                               | 0.001  | 1.000 | 4.352 | 0.002  |
| FHL5                               | 0.059  | 1.042 | 4.667 | 0.150  |
| FHOD3                              | 0.480  | 1.394 | 6.157 | 1.372  |
| FIBIN                              | 0.237  | 1.179 | 5.804 | 1.051  |
| FICD                               | -0.321 | 0.800 | 3.089 | -1.641 |
| FIG4                               | 0.198  | 1.147 | 6.186 | 0.902  |
| FIGNL1                             | 0.121  | 1.087 | 3.825 | 0.485  |
| FILIP1                             | 0.679  | 1.601 | 3.933 | 2.478  |
| FIRRE//RP11-453F18__B.1            | -0.240 | 0.847 | 2.450 | -1.055 |
| FJX1                               | 0.413  | 1.331 | 5.448 | 1.412  |
| FKBP10                             | -0.052 | 0.965 | 4.973 | -0.239 |
| FKBP11                             | 0.721  | 1.649 | 4.144 | 2.676  |
| FKBP1B                             | 1.133  | 2.193 | 3.072 | 3.327  |
| FKBP4                              | -0.252 | 0.840 | 6.621 | -0.871 |
| FKBP5//LOC285847                   | -0.193 | 0.875 | 5.133 | -0.574 |
| FKSG29                             | -0.199 | 0.871 | 3.919 | -0.765 |
| FKSG49                             | -0.164 | 0.892 | 9.278 | -0.699 |
| FKTN                               | -0.079 | 0.947 | 5.117 | -0.295 |
| FLG-AS1                            | -0.313 | 0.805 | 3.586 | -1.097 |
| FLI1                               | 0.062  | 1.044 | 3.763 | 0.238  |
| FLII                               | -0.200 | 0.871 | 6.975 | -0.982 |
| FLJ16779                           | 0.106  | 1.076 | 2.232 | 0.397  |
| FLJ20021//AP001816.1               | 0.489  | 1.404 | 4.932 | 1.534  |
| FLJ21369                           | -0.325 | 0.798 | 3.255 | -1.009 |
| FLJ22184//CTD-3193O13.9            | 0.698  | 1.622 | 4.076 | 1.792  |
| FLJ25917//RP5-1158E12.3            | 0.513  | 1.427 | 1.777 | 1.419  |
| FLJ27354//RP5-1007M22.2            | -0.163 | 0.893 | 3.882 | -0.521 |
| FLJ31104//CTD-2031P19.3            | -0.245 | 0.844 | 2.491 | -0.933 |
| FLJ31183                           | -0.221 | 0.858 | 2.193 | -1.015 |
| FLJ33360//CTD-2324F15.2            | 0.250  | 1.189 | 2.379 | 0.894  |
| FLJ33534//AC062028.1               | 0.720  | 1.647 | 2.347 | 2.471  |
| FLJ35934//RP1-37N7.3               | -0.104 | 0.930 | 2.657 | -0.441 |
| FLJ37035//RP11-383C5.5             | 0.309  | 1.239 | 2.126 | 1.272  |
| FLJ37201                           | -0.642 | 0.641 | 2.632 | -2.504 |
| FLJ38717                           | -0.590 | 0.665 | 3.181 | -2.258 |
| FLJ41130                           | 0.792  | 1.732 | 4.200 | 1.992  |
| FLJ41278//RP11-766N7.3             | 0.915  | 1.885 | 3.466 | 2.114  |
| FLJ41733//AP001046.6               | -0.300 | 0.812 | 3.327 | -1.086 |
| FLJ42627//RP11-20I23.13            | 0.300  | 1.231 | 4.578 | 1.115  |
| FLJ43315                           | -0.079 | 0.947 | 2.882 | -0.271 |
| FLJ43681//LOC101930151//AC139099.3 | 0.429  | 1.347 | 2.745 | 1.725  |
| FLJ44635//NHSL2                    | 0.066  | 1.047 | 2.878 | 0.258  |

|                                   |        |       |       |        |
|-----------------------------------|--------|-------|-------|--------|
| FLNA                              | -0.067 | 0.955 | 6.235 | -0.269 |
| FLNB                              | -0.660 | 0.633 | 6.351 | -2.634 |
| FLNC                              | -0.852 | 0.554 | 6.718 | -2.320 |
| FLRT2//LOC100506718               | 0.705  | 1.631 | 4.943 | 1.755  |
| FLRT3                             | 1.107  | 2.154 | 4.211 | 2.896  |
| FLT1                              | 0.322  | 1.250 | 6.560 | 1.179  |
| FLT3                              | 0.424  | 1.342 | 3.223 | 1.334  |
| FLT3LG//CTD-3148110.15            | -0.184 | 0.880 | 4.253 | -0.821 |
| FLVCR2                            | -0.143 | 0.906 | 2.944 | -0.599 |
| FMN1                              | 0.812  | 1.755 | 5.219 | 2.581  |
| FMNL2                             | -0.765 | 0.589 | 9.652 | -2.659 |
| FMNL3                             | -0.390 | 0.763 | 5.679 | -1.438 |
| FMO2                              | 0.421  | 1.338 | 3.128 | 1.397  |
| FMO4                              | -0.672 | 0.628 | 3.064 | -1.810 |
| FMO5                              | -0.690 | 0.620 | 3.184 | -2.219 |
| FMOD                              | 0.909  | 1.878 | 4.729 | 2.257  |
| FN1                               | 0.404  | 1.323 | 7.682 | 1.363  |
| FNBP1                             | -0.657 | 0.634 | 8.013 | -2.288 |
| FNBP1L                            | -0.221 | 0.858 | 7.107 | -0.989 |
| FNDC3B//LOC101928615              | -0.111 | 0.926 | 6.673 | -0.524 |
| FNDC4                             | 0.721  | 1.648 | 6.196 | 1.875  |
| FNDC5                             | 0.455  | 1.371 | 4.255 | 1.437  |
| FNDC9                             | 0.307  | 1.237 | 4.696 | 0.707  |
| FNIP2                             | 0.281  | 1.215 | 6.086 | 1.318  |
| FNTA//RP11-598P20.5               | -0.463 | 0.725 | 6.509 | -1.976 |
| FOCAD                             | 0.653  | 1.572 | 6.589 | 2.560  |
| FOLH1//FOLH1B                     | -1.317 | 0.401 | 6.356 | -2.285 |
| FOLH1B                            | -0.310 | 0.806 | 2.631 | -1.102 |
| FOLR1                             | -0.357 | 0.781 | 2.119 | -1.188 |
| FOLR2                             | 0.359  | 1.282 | 3.203 | 1.135  |
| FOS                               | 0.334  | 1.260 | 7.068 | 0.844  |
| FOSB                              | 0.427  | 1.345 | 3.716 | 1.228  |
| FOSL1                             | 0.251  | 1.190 | 2.696 | 0.784  |
| FOSL2                             | 0.436  | 1.353 | 6.033 | 1.199  |
| FOXB1                             | -0.426 | 0.744 | 2.051 | -1.705 |
| FOXC1                             | 0.398  | 1.318 | 5.794 | 1.259  |
| FOXC2                             | -0.448 | 0.733 | 2.786 | -1.244 |
| FOXD4                             | 0.421  | 1.339 | 4.160 | 0.950  |
| FOXD4L1                           | 0.129  | 1.093 | 3.078 | 0.384  |
| FOXD4L5//FOXD4L4//FOXD4L6//FOXD4I | 0.366  | 1.289 | 2.490 | 1.116  |
| FOXD4L6                           | 0.238  | 1.179 | 3.417 | 0.745  |
| FOXD4L6//FOXD4L5//FOXD4L3//FOXD4I | 0.319  | 1.247 | 3.752 | 1.226  |
| FOXF1                             | 0.141  | 1.103 | 4.412 | 0.485  |
| FOXF2                             | 0.401  | 1.320 | 4.622 | 1.401  |
| FOXG1                             | 1.982  | 3.950 | 3.405 | 2.438  |
| FOXJ1                             | -0.331 | 0.795 | 3.471 | -0.996 |
| FOXN2                             | -0.644 | 0.640 | 6.710 | -2.369 |
| FOXO4                             | -0.586 | 0.666 | 5.668 | -2.093 |
| FOXP1-IT1                         | -0.304 | 0.810 | 3.287 | -1.012 |
| FOXP2                             | 0.362  | 1.285 | 3.330 | 1.207  |

|                                   |        |       |        |        |
|-----------------------------------|--------|-------|--------|--------|
| FOXQ1                             | 0.257  | 1.195 | 3.227  | 0.973  |
| FPR1                              | 0.399  | 1.318 | 5.205  | 0.708  |
| FPR3                              | 0.614  | 1.531 | 3.338  | 1.239  |
| FRAS1                             | 0.855  | 1.808 | 3.547  | 2.170  |
| FRAT2                             | 0.360  | 1.283 | 4.386  | 1.315  |
| FREM1                             | -0.313 | 0.805 | 4.608  | -0.993 |
| FREM2                             | 0.010  | 1.007 | 2.856  | 0.033  |
| FREM3                             | 1.443  | 2.720 | 3.043  | 2.381  |
| FRG1//LOC100289097//LOC101930278/ | 0.048  | 1.034 | 3.401  | 0.173  |
| FRK                               | -0.430 | 0.742 | 3.076  | -1.462 |
| FRMD4B                            | -1.011 | 0.496 | 4.936  | -2.608 |
| FRMD8                             | 0.006  | 1.004 | 2.887  | 0.022  |
| FRMD8P1                           | -0.071 | 0.952 | 2.689  | -0.195 |
| FRMPD1                            | -0.123 | 0.918 | 2.480  | -0.447 |
| FRMPD2//FRMPD2P1//LOC101930006/   | 0.820  | 1.766 | 5.308  | 1.964  |
| FRMPD2//LOC101930006              | -0.891 | 0.539 | 3.536  | -2.087 |
| FRMPD3                            | -0.408 | 0.754 | 4.669  | -1.406 |
| FRMPD4                            | 2.199  | 4.593 | 4.889  | 2.789  |
| FRRS1L                            | 1.001  | 2.002 | 6.782  | 2.314  |
| FRS3                              | 0.428  | 1.345 | 3.885  | 2.251  |
| FRY                               | 0.435  | 1.352 | 6.932  | 1.569  |
| FRY                               | -0.041 | 0.972 | 3.482  | -0.153 |
| FRY-AS1                           | 0.586  | 1.501 | 2.591  | 2.037  |
| FRYL                              | -0.710 | 0.611 | 7.654  | -2.438 |
| FRZB                              | 0.859  | 1.814 | 5.999  | 1.743  |
| FSD1                              | 0.324  | 1.252 | 5.396  | 1.067  |
| FSTL1                             | 0.442  | 1.358 | 5.147  | 2.183  |
| FSTL3                             | 0.056  | 1.039 | 4.502  | 0.207  |
| FSTL4                             | 1.093  | 2.133 | 3.827  | 2.540  |
| FSTL5                             | -0.144 | 0.905 | 5.618  | -0.512 |
| FTL//SRGAP1//GBP4                 | -0.370 | 0.774 | 10.983 | -1.818 |
| FUCA1                             | 0.200  | 1.149 | 5.262  | 0.679  |
| FUCA2                             | -0.444 | 0.735 | 5.152  | -1.724 |
| FUOM                              | -0.001 | 0.999 | 2.649  | -0.006 |
| FUT1                              | 0.373  | 1.295 | 2.369  | 1.500  |
| FUT10                             | -0.345 | 0.787 | 5.355  | -1.435 |
| FUT4                              | -0.589 | 0.665 | 3.682  | -2.304 |
| FXYD1//CTD-2527I21.4              | -0.243 | 0.845 | 6.939  | -1.158 |
| FXYD4                             | -0.410 | 0.753 | 3.165  | -1.355 |
| FXYD5                             | -0.295 | 0.815 | 4.974  | -1.097 |
| FXYD7//CTD-2527I21.4              | 0.622  | 1.539 | 5.252  | 1.665  |
| FYB                               | -0.460 | 0.727 | 5.504  | -1.146 |
| FYCO1                             | -0.551 | 0.683 | 5.975  | -2.516 |
| FZD2                              | 0.110  | 1.079 | 2.570  | 0.405  |
| FZD3                              | 0.987  | 1.981 | 6.859  | 3.069  |
| FZD4                              | 0.489  | 1.403 | 4.599  | 1.672  |
| FZD5                              | -0.551 | 0.682 | 3.629  | -2.213 |
| FZD7                              | -0.282 | 0.822 | 3.927  | -0.750 |
| GOS2                              | -0.307 | 0.809 | 4.627  | -0.772 |
| G2E3                              | 0.098  | 1.070 | 5.089  | 0.399  |

|                       |        |       |       |        |
|-----------------------|--------|-------|-------|--------|
| G3BP2                 | 0.393  | 1.313 | 6.647 | 1.923  |
| G6PC3                 | -0.243 | 0.845 | 7.914 | -1.049 |
| GAA                   | -0.236 | 0.849 | 6.175 | -1.311 |
| GAB1                  | -0.647 | 0.638 | 5.830 | -2.165 |
| GAB2                  | -0.566 | 0.675 | 5.018 | -1.935 |
| GAB3                  | -0.130 | 0.914 | 3.601 | -0.458 |
| GABARAPL1             | 0.329  | 1.256 | 6.351 | 1.289  |
| GABBR1                | 0.337  | 1.263 | 8.011 | 1.356  |
| GABBR1                | 0.345  | 1.270 | 8.488 | 1.347  |
| GABBR1                | 0.326  | 1.254 | 8.064 | 1.311  |
| GABBR1                | 0.321  | 1.250 | 7.895 | 1.284  |
| GABBR1                | 0.307  | 1.237 | 8.050 | 1.246  |
| GABBR1                | 0.312  | 1.241 | 7.470 | 1.230  |
| GABBR2                | 1.690  | 3.227 | 7.282 | 2.329  |
| GABPB2                | -0.736 | 0.600 | 5.594 | -3.228 |
| GABRA1                | 2.073  | 4.207 | 5.002 | 2.649  |
| GABRA2                | 1.121  | 2.175 | 4.294 | 2.852  |
| GABRA3                | 1.163  | 2.239 | 6.160 | 2.329  |
| GABRA4                | 1.908  | 3.753 | 4.954 | 2.666  |
| GABRA5                | 1.982  | 3.950 | 4.329 | 3.186  |
| GABRB1                | 0.578  | 1.493 | 5.974 | 1.871  |
| GABRB2                | 2.429  | 5.387 | 4.684 | 3.188  |
| GABRB3                | 0.700  | 1.624 | 3.965 | 2.221  |
| GABRD                 | 2.170  | 4.499 | 4.010 | 3.347  |
| GABRE//MIR224//MIR452 | 0.477  | 1.391 | 3.283 | 1.518  |
| GABRG1                | 0.088  | 1.063 | 7.434 | 0.295  |
| GABRG2                | 1.515  | 2.857 | 6.796 | 1.897  |
| GABRG3                | 1.278  | 2.426 | 2.736 | 3.770  |
| GABRQ                 | 0.255  | 1.194 | 4.212 | 0.432  |
| GAD1                  | 1.189  | 2.280 | 4.319 | 2.570  |
| GAD2                  | 1.331  | 2.515 | 5.282 | 2.042  |
| GADD45A               | 0.834  | 1.782 | 7.831 | 1.447  |
| GADD45B               | 1.083  | 2.118 | 8.276 | 2.795  |
| GADD45G               | -0.486 | 0.714 | 4.504 | -0.858 |
| GAL                   | -0.341 | 0.790 | 2.652 | -0.994 |
| GAL3ST2               | -0.588 | 0.665 | 2.995 | -1.821 |
| GAL3ST3               | 0.329  | 1.256 | 3.725 | 1.436  |
| GAL3ST4               | -0.218 | 0.860 | 2.579 | -0.781 |
| GALM                  | 0.213  | 1.159 | 3.491 | 0.783  |
| GALNT11               | 0.522  | 1.436 | 5.773 | 2.100  |
| GALNT14               | 0.450  | 1.366 | 2.080 | 1.657  |
| GALNT15               | -0.862 | 0.550 | 7.548 | -1.927 |
| GALNT16               | 0.690  | 1.613 | 4.889 | 2.079  |
| GALNT18               | 0.342  | 1.267 | 4.886 | 1.212  |
| GALNT3                | -0.100 | 0.933 | 3.824 | -0.379 |
| GALNT6                | -0.456 | 0.729 | 4.583 | -1.274 |
| GALNT7                | -0.645 | 0.639 | 5.197 | -2.478 |
| GALNT9                | 1.013  | 2.018 | 5.021 | 2.214  |
| GALNTL6               | 0.985  | 1.980 | 2.423 | 2.505  |
| GALR3                 | -0.422 | 0.746 | 2.269 | -1.632 |

|                                 |        |       |        |        |
|---------------------------------|--------|-------|--------|--------|
| GANC                            | -0.563 | 0.677 | 5.516  | -2.101 |
| GANC//RP11-164J13.1//CAPN3      | -0.658 | 0.634 | 3.356  | -1.710 |
| GAP43                           | 1.070  | 2.099 | 7.213  | 2.292  |
| GAPT                            | -0.764 | 0.589 | 3.356  | -1.736 |
| GAREML                          | -0.307 | 0.808 | 4.898  | -0.861 |
| GARNL3                          | 0.073  | 1.052 | 5.409  | 0.387  |
| GARS                            | 0.595  | 1.511 | 6.300  | 2.184  |
| GAS2L3                          | 0.538  | 1.452 | 3.119  | 1.512  |
| GAS5//SNORD81//SNORD79//SNORD80 | -0.090 | 0.939 | 4.552  | -0.368 |
| GAS5-AS1//GAS5                  | 0.231  | 1.174 | 2.606  | 0.734  |
| GAS6-AS1                        | -0.155 | 0.898 | 2.257  | -0.602 |
| GAS6-AS2                        | 0.426  | 1.344 | 3.135  | 1.279  |
| GAS7                            | 0.436  | 1.353 | 7.734  | 1.864  |
| GBA2                            | 0.151  | 1.111 | 6.075  | 0.721  |
| GBE1                            | -0.141 | 0.907 | 5.193  | -0.519 |
| GBP1                            | 0.382  | 1.303 | 4.083  | 1.024  |
| GBP2                            | 0.308  | 1.238 | 5.477  | 0.631  |
| GBP2                            | 0.161  | 1.118 | 4.176  | 0.282  |
| GBP3                            | -0.926 | 0.526 | 4.596  | -2.661 |
| GBP4                            | -0.063 | 0.957 | 4.390  | -0.131 |
| GBX2                            | -0.120 | 0.920 | 2.870  | -0.485 |
| GCA                             | -0.089 | 0.940 | 5.696  | -0.287 |
| GCC2                            | 0.457  | 1.372 | 7.406  | 2.334  |
| GCLM                            | 0.517  | 1.431 | 5.140  | 2.007  |
| GCNT1                           | 0.585  | 1.500 | 2.980  | 2.360  |
| GCNT4                           | 1.988  | 3.968 | 2.925  | 4.322  |
| GCSHP3//AC007383.4              | 0.132  | 1.096 | 3.109  | 0.613  |
| GCSHP3//NDUFS1                  | 0.527  | 1.441 | 6.291  | 2.055  |
| GDA                             | 2.849  | 7.204 | 4.772  | 3.142  |
| GDAP1                           | 0.506  | 1.420 | 6.515  | 1.929  |
| GDAP1L1                         | 0.853  | 1.806 | 3.587  | 2.082  |
| GDAP2                           | 0.190  | 1.141 | 6.190  | 0.793  |
| GDF1//CERS1                     | -0.492 | 0.711 | 7.142  | -2.335 |
| GDF10                           | -0.024 | 0.983 | 4.235  | -0.103 |
| GDF11                           | -0.358 | 0.780 | 6.017  | -1.374 |
| GDF15                           | 0.033  | 1.023 | 3.047  | 0.095  |
| GDF7                            | 0.348  | 1.273 | 2.446  | 1.053  |
| GDPD1                           | 0.345  | 1.270 | 6.013  | 1.306  |
| GDPD2                           | -0.260 | 0.835 | 5.021  | -1.103 |
| GDPD3                           | -0.389 | 0.763 | 2.518  | -1.348 |
| GEM                             | 0.495  | 1.409 | 3.704  | 1.619  |
| GEMIN7                          | -0.385 | 0.766 | 3.647  | -1.441 |
| GEMIN8                          | -0.008 | 0.994 | 4.937  | -0.033 |
| GEMIN8P4                        | 0.649  | 1.568 | 2.319  | 2.577  |
| GEN1                            | 0.315  | 1.244 | 3.332  | 1.127  |
| GFAP                            | -0.283 | 0.822 | 10.929 | -0.811 |
| GFM2                            | 0.170  | 1.125 | 5.481  | 0.827  |
| GFOD1                           | 0.615  | 1.531 | 3.894  | 1.584  |
| GFOD1-AS1                       | 0.710  | 1.636 | 2.575  | 2.309  |
| GFOD2                           | 0.660  | 1.580 | 3.989  | 1.998  |

|                                    |        |       |       |        |
|------------------------------------|--------|-------|-------|--------|
| GFPT2                              | 0.084  | 1.060 | 5.403 | 0.248  |
| GFRA1                              | 0.050  | 1.035 | 5.070 | 0.170  |
| GFRA2                              | 1.472  | 2.774 | 3.782 | 2.891  |
| GGA3                               | 0.214  | 1.160 | 5.565 | 1.026  |
| GGCT                               | 0.780  | 1.717 | 4.737 | 3.018  |
| GGH                                | 0.494  | 1.409 | 3.199 | 2.403  |
| GGT2                               | -0.236 | 0.849 | 2.551 | -0.787 |
| GGT5                               | 0.376  | 1.298 | 4.431 | 0.926  |
| GGTA1P                             | 0.397  | 1.317 | 2.592 | 1.320  |
| GHITM                              | 0.430  | 1.347 | 8.504 | 1.923  |
| GHR                                | 0.238  | 1.179 | 2.703 | 0.910  |
| GHRLOS                             | -0.589 | 0.665 | 2.895 | -2.585 |
| GIMAP4                             | -0.277 | 0.825 | 4.877 | -0.979 |
| GIMAP6                             | -0.118 | 0.921 | 3.652 | -0.423 |
| GIMAP7                             | 0.015  | 1.011 | 4.666 | 0.046  |
| GIMAP8                             | -0.082 | 0.945 | 3.971 | -0.251 |
| GINS3                              | -0.329 | 0.796 | 4.192 | -1.295 |
| GIPC3                              | -0.044 | 0.970 | 3.117 | -0.126 |
| GIT1                               | 0.329  | 1.257 | 6.745 | 1.346  |
| GJA1//IFT140                       | -0.380 | 0.769 | 8.955 | -1.131 |
| GJA4                               | 0.028  | 1.019 | 2.742 | 0.092  |
| GJB1                               | -1.288 | 0.409 | 3.786 | -2.779 |
| GJB2                               | 0.520  | 1.434 | 3.580 | 1.076  |
| GJB6                               | 0.929  | 1.904 | 4.566 | 1.553  |
| GJC1                               | 0.434  | 1.351 | 3.280 | 1.381  |
| GJC2                               | -1.305 | 0.405 | 5.015 | -3.753 |
| GJC3                               | -0.182 | 0.881 | 2.696 | -0.409 |
| GJD2                               | 0.219  | 1.164 | 3.391 | 0.712  |
| GK5                                | -0.285 | 0.821 | 5.406 | -1.014 |
| GK-IT1                             | 0.225  | 1.169 | 3.845 | 0.726  |
| GLA                                | -0.034 | 0.977 | 5.104 | -0.110 |
| GLB1L                              | 0.156  | 1.114 | 3.409 | 0.557  |
| GLB1L3                             | 0.882  | 1.844 | 2.403 | 2.943  |
| GLCCI1                             | 0.307  | 1.237 | 2.773 | 1.485  |
| GLDC                               | 0.830  | 1.778 | 4.868 | 2.640  |
| GLDN                               | -0.938 | 0.522 | 6.917 | -2.232 |
| GLI2                               | 0.089  | 1.063 | 3.566 | 0.330  |
| GLI3                               | 0.241  | 1.182 | 3.927 | 1.116  |
| GLIDR//LOC102724238//LOC554249//RI | -0.411 | 0.752 | 4.951 | -1.566 |
| GLIDR//RP11-211N8.2                | -0.027 | 0.982 | 3.664 | -0.095 |
| GLIPR1                             | 0.385  | 1.306 | 7.029 | 1.170  |
| GLIPR1L2                           | -0.665 | 0.631 | 4.709 | -1.799 |
| GLIPR2                             | -0.309 | 0.807 | 5.667 | -0.886 |
| GLIS3                              | -0.533 | 0.691 | 4.919 | -1.818 |
| GLMN                               | 0.719  | 1.646 | 3.692 | 2.773  |
| GLP1R                              | -0.390 | 0.763 | 2.357 | -1.493 |
| GLP2R                              | 1.323  | 2.502 | 3.008 | 2.724  |
| GLRA1                              | -1.427 | 0.372 | 4.668 | -1.544 |
| GLRA2                              | 0.520  | 1.434 | 4.233 | 1.019  |
| GLRA3                              | 1.622  | 3.079 | 4.914 | 2.205  |

|                                  |        |       |       |        |
|----------------------------------|--------|-------|-------|--------|
| GLRB                             | 1.185  | 2.274 | 4.709 | 2.315  |
| GLRX                             | 0.237  | 1.179 | 4.697 | 0.625  |
| GLRX2                            | 0.412  | 1.331 | 4.564 | 1.851  |
| GLS                              | 0.879  | 1.839 | 6.556 | 2.799  |
| GLS2                             | 0.846  | 1.797 | 4.756 | 1.726  |
| GLT1D1                           | 0.925  | 1.899 | 4.943 | 2.424  |
| GLTP                             | -1.243 | 0.423 | 8.323 | -3.299 |
| GLTSCR2//SNORD23                 | -0.404 | 0.756 | 7.087 | -2.118 |
| GLUD1                            | -0.371 | 0.773 | 5.880 | -1.295 |
| GLUD1P7                          | 0.445  | 1.361 | 2.865 | 1.693  |
| GLUL                             | -0.455 | 0.729 | 8.667 | -1.435 |
| GLYATL2                          | 0.167  | 1.123 | 3.401 | 0.375  |
| GM2A                             | -0.400 | 0.758 | 6.202 | -1.808 |
| GMFG                             | -0.283 | 0.822 | 6.432 | -0.650 |
| GMIP                             | -0.229 | 0.853 | 3.980 | -0.740 |
| GMPR                             | -0.907 | 0.533 | 5.157 | -2.399 |
| GMPS                             | 0.319  | 1.247 | 6.728 | 1.627  |
| GNA12                            | -0.166 | 0.891 | 5.142 | -0.772 |
| GNA13                            | -0.356 | 0.782 | 6.407 | -1.460 |
| GNA14                            | 0.086  | 1.061 | 5.424 | 0.257  |
| GNA15                            | 0.363  | 1.286 | 3.908 | 0.988  |
| GNAI2                            | -0.191 | 0.876 | 4.631 | -0.839 |
| GNAI3//RP5-1160K1.3              | 0.547  | 1.461 | 3.253 | 2.301  |
| GNAL                             | 0.687  | 1.610 | 4.039 | 1.657  |
| GNAO1                            | 0.164  | 1.120 | 9.735 | 0.820  |
| GNB1L//C22orf29                  | 0.190  | 1.140 | 3.194 | 0.689  |
| GNB4                             | 0.138  | 1.100 | 4.918 | 0.579  |
| GNB5                             | 0.987  | 1.983 | 4.188 | 2.203  |
| GNB5                             | 0.504  | 1.418 | 3.235 | 1.902  |
| GNG12                            | -0.467 | 0.723 | 5.459 | -1.790 |
| GNG13                            | 0.714  | 1.640 | 3.669 | 1.842  |
| GNG2                             | 0.196  | 1.145 | 2.753 | 0.747  |
| GNG3                             | 0.928  | 1.903 | 8.009 | 1.771  |
| GNG4                             | 0.155  | 1.113 | 4.500 | 0.524  |
| GNG5                             | -0.244 | 0.844 | 3.501 | -0.892 |
| GNG5P2                           | 0.075  | 1.054 | 5.872 | 0.254  |
| GNL3//SNORD19B                   | 0.261  | 1.199 | 5.928 | 1.131  |
| GNLY                             | 0.009  | 1.006 | 2.492 | 0.030  |
| GNPDA2                           | 0.753  | 1.685 | 5.150 | 2.921  |
| GNPNAT1                          | 0.311  | 1.240 | 4.481 | 1.431  |
| GNPTAB                           | 0.375  | 1.296 | 5.533 | 1.768  |
| GNRHR2                           | 0.164  | 1.120 | 3.010 | 0.677  |
| GOLGA2P1                         | 0.560  | 1.474 | 2.689 | 1.680  |
| GOLGA2P5//GOLGA2B                | -0.095 | 0.936 | 3.391 | -0.327 |
| GOLGA2P6//MTPAP                  | -0.007 | 0.995 | 2.045 | -0.023 |
| GOLGA2P7//LOC642423//LOC10192947 | 0.791  | 1.730 | 3.591 | 1.793  |
| GOLGA6L10//GOLGA6L4//GOLGA6L9//C | 0.005  | 1.004 | 5.770 | 0.022  |
| GOLGA6L4//GOLGA6L5P//GOLGA6L17P, | 0.002  | 1.001 | 5.523 | 0.006  |
| GOLGA7B                          | 0.724  | 1.651 | 4.176 | 2.216  |
| GOLGA7B                          | 0.620  | 1.537 | 2.233 | 1.733  |

|                                 |        |       |       |        |
|---------------------------------|--------|-------|-------|--------|
| GOLGA8A//GOLGA8B//LOC101930583  | 0.120  | 1.087 | 7.451 | 0.526  |
| GOLGA8A//GOLGA8B//LOC101930583  | 0.097  | 1.070 | 7.490 | 0.418  |
| GOLGA8EP                        | -0.318 | 0.802 | 3.684 | -1.181 |
| GOLGA8J                         | -0.471 | 0.721 | 3.073 | -1.526 |
| GOLGA8J                         | -0.358 | 0.780 | 3.070 | -1.032 |
| GOLGA8M//GOLGA8J//GOLGA8K//GOLC | -0.296 | 0.814 | 5.556 | -1.250 |
| GOLGA8O//GOLGA8N//GOLGA8Q//GOL  | -0.487 | 0.714 | 6.517 | -1.845 |
| GOLGA8O//GOLGA8R//GOLGA8N//GOL  | -0.552 | 0.682 | 5.946 | -2.319 |
| GOLGA8O//GOLGA8R//GOLGA8N//GOL  | -0.520 | 0.697 | 6.092 | -2.121 |
| GOLGA8S                         | 0.081  | 1.058 | 3.455 | 0.228  |
| GOLIM4                          | -0.072 | 0.951 | 8.350 | -0.345 |
| GOLT1B                          | 0.257  | 1.195 | 6.272 | 1.127  |
| GOPC                            | 0.420  | 1.338 | 7.188 | 2.004  |
| GORASP1                         | 0.044  | 1.031 | 4.040 | 0.171  |
| GOT1                            | 0.567  | 1.481 | 8.249 | 1.787  |
| GOT2                            | 0.439  | 1.355 | 7.789 | 2.324  |
| GPAM                            | -0.202 | 0.869 | 5.018 | -0.849 |
| GPATCH1                         | -0.028 | 0.981 | 5.970 | -0.133 |
| GPATCH2                         | 0.534  | 1.448 | 5.179 | 2.679  |
| GPATCH2L                        | 0.054  | 1.038 | 5.122 | 0.244  |
| GPATCH4                         | 0.254  | 1.193 | 3.682 | 0.974  |
| GPC2                            | 0.007  | 1.005 | 2.434 | 0.032  |
| GPC3                            | 0.196  | 1.145 | 2.806 | 0.598  |
| GPC4                            | -0.164 | 0.892 | 5.379 | -0.763 |
| GPC5                            | 0.124  | 1.090 | 5.463 | 0.479  |
| GPC6                            | -0.252 | 0.840 | 5.599 | -0.895 |
| GPCPD1                          | 0.103  | 1.074 | 6.558 | 0.390  |
| GPD1                            | -0.461 | 0.727 | 4.266 | -1.107 |
| GPD1L                           | 0.346  | 1.271 | 7.013 | 1.394  |
| GPI                             | 0.545  | 1.459 | 8.480 | 2.018  |
| GPIHBP1                         | -1.048 | 0.484 | 5.359 | -1.993 |
| GPLD1                           | 0.338  | 1.264 | 4.308 | 1.075  |
| GPNMB                           | -0.261 | 0.834 | 5.228 | -0.594 |
| GPR101                          | -0.177 | 0.884 | 3.264 | -0.658 |
| GPR108//MIR6791                 | -0.183 | 0.881 | 4.008 | -0.858 |
| GPR116                          | 0.421  | 1.339 | 5.759 | 2.141  |
| GPR12                           | 0.817  | 1.762 | 4.202 | 1.920  |
| GPR123                          | 0.220  | 1.165 | 3.264 | 0.886  |
| GPR125                          | -0.365 | 0.776 | 6.387 | -1.420 |
| GPR126                          | 0.052  | 1.037 | 3.297 | 0.175  |
| GPR132                          | -0.246 | 0.843 | 2.582 | -0.884 |
| GPR133                          | 0.007  | 1.005 | 2.972 | 0.027  |
| GPR137C                         | 0.183  | 1.135 | 5.443 | 0.783  |
| GPR141                          | -0.279 | 0.824 | 2.737 | -1.263 |
| GPR146//RP11-449P15.1           | 0.291  | 1.223 | 2.575 | 0.913  |
| GPR149                          | 0.088  | 1.063 | 2.566 | 0.245  |
| GPR150                          | 1.215  | 2.321 | 2.331 | 4.301  |
| GPR153                          | 0.330  | 1.257 | 3.523 | 0.901  |
| GPR155                          | 0.653  | 1.573 | 6.330 | 2.114  |
| GPR158                          | 0.674  | 1.595 | 7.471 | 1.694  |



|                                 |        |       |       |        |
|---------------------------------|--------|-------|-------|--------|
| GPR162                          | 0.922  | 1.894 | 5.615 | 2.317  |
| GPR17                           | -0.823 | 0.565 | 3.136 | -2.189 |
| GPR176                          | 0.524  | 1.438 | 2.832 | 1.829  |
| GPR179                          | 0.675  | 1.597 | 3.424 | 3.018  |
| GPR180                          | 0.219  | 1.164 | 5.696 | 0.878  |
| GPR183                          | 0.243  | 1.183 | 6.349 | 0.469  |
| GPR20                           | -0.070 | 0.953 | 2.798 | -0.229 |
| GPR21//RABGAP1                  | 0.800  | 1.741 | 5.205 | 2.007  |
| GPR22                           | 2.278  | 4.851 | 3.876 | 3.197  |
| GPR26                           | 0.690  | 1.613 | 3.796 | 1.292  |
| GPR3                            | 0.433  | 1.350 | 4.006 | 1.408  |
| GPR34                           | -1.165 | 0.446 | 5.673 | -2.885 |
| GPR37//SEL1L2                   | -1.288 | 0.409 | 8.623 | -3.033 |
| GPR37L1                         | -0.372 | 0.773 | 6.898 | -1.203 |
| GPR4                            | 0.519  | 1.433 | 4.550 | 1.539  |
| GPR45                           | 0.609  | 1.525 | 2.542 | 2.287  |
| GPR52                           | -0.023 | 0.984 | 3.594 | -0.086 |
| GPR56                           | 0.168  | 1.124 | 7.922 | 0.749  |
| GPR6                            | 0.185  | 1.137 | 3.610 | 0.641  |
| GPR61                           | 0.806  | 1.749 | 2.918 | 2.559  |
| GPR62                           | -0.747 | 0.596 | 3.573 | -2.098 |
| GPR63                           | 1.509  | 2.846 | 3.068 | 3.109  |
| GPR65                           | -0.405 | 0.755 | 4.512 | -1.104 |
| GPR83                           | 0.894  | 1.858 | 4.085 | 1.597  |
| GPR85                           | 0.605  | 1.520 | 4.013 | 1.582  |
| GPR88                           | -0.416 | 0.750 | 3.999 | -1.345 |
| GPR98                           | 0.851  | 1.804 | 4.365 | 1.661  |
| GPRASP1                         | 0.417  | 1.335 | 5.853 | 1.556  |
| GPRASP2//ARMCX5//ARMCX5-GPRASP2 | 0.273  | 1.209 | 4.522 | 0.934  |
| GPRC5A                          | 0.139  | 1.101 | 2.334 | 0.391  |
| GPRC5B                          | -0.559 | 0.679 | 9.856 | -2.240 |
| GPRIN1                          | 0.423  | 1.341 | 4.314 | 1.083  |
| GPSM2                           | -0.518 | 0.698 | 6.659 | -2.125 |
| GPSM3                           | -0.120 | 0.920 | 3.071 | -0.442 |
| GPT2                            | -0.291 | 0.817 | 5.960 | -1.310 |
| GPX1                            | -0.325 | 0.798 | 4.873 | -1.433 |
| GPX3                            | 0.732  | 1.661 | 3.856 | 1.774  |
| GPX8                            | 0.061  | 1.043 | 2.363 | 0.184  |
| GRAMD1B                         | 0.605  | 1.521 | 6.377 | 1.769  |
| GRAMD3                          | -0.435 | 0.739 | 5.501 | -1.494 |
| GRAPL                           | -0.696 | 0.617 | 2.392 | -1.690 |
| GRASP                           | 0.587  | 1.502 | 3.731 | 2.267  |
| GRB14                           | 0.732  | 1.661 | 3.283 | 1.885  |
| GREB1L                          | -0.617 | 0.652 | 3.774 | -1.925 |
| GREM1                           | -0.995 | 0.502 | 5.995 | -2.749 |
| GREM2                           | 0.657  | 1.577 | 4.149 | 1.784  |
| GRHL1                           | 0.518  | 1.432 | 1.979 | 1.682  |
| GRHL3                           | -0.173 | 0.887 | 3.206 | -0.328 |
| GRIA1                           | 1.018  | 2.024 | 5.069 | 2.189  |
| GRIA2                           | 0.821  | 1.767 | 6.772 | 2.621  |

|                                   |        |       |       |        |
|-----------------------------------|--------|-------|-------|--------|
| GRIA3                             | 0.717  | 1.644 | 6.672 | 2.513  |
| GRIA4                             | 0.174  | 1.128 | 7.020 | 0.777  |
| GRID2                             | -0.130 | 0.914 | 4.554 | -0.537 |
| GRIK1                             | 0.743  | 1.674 | 4.811 | 1.813  |
| GRIK2                             | 0.721  | 1.649 | 6.015 | 1.931  |
| GRIK3                             | 0.261  | 1.198 | 5.391 | 1.084  |
| GRIK5                             | 0.587  | 1.503 | 6.032 | 2.252  |
| GRIN1                             | 1.555  | 2.939 | 6.872 | 1.903  |
| GRIN2A                            | 1.678  | 3.200 | 5.381 | 2.852  |
| GRIN2B                            | 1.709  | 3.269 | 5.809 | 2.488  |
| GRIN3A                            | 0.739  | 1.669 | 4.568 | 2.491  |
| GRIP1                             | 0.453  | 1.369 | 4.497 | 1.641  |
| GRIP2                             | 0.124  | 1.090 | 3.110 | 0.448  |
| GRIPAP1                           | 0.201  | 1.150 | 6.392 | 1.030  |
| GRM1                              | 0.918  | 1.890 | 4.438 | 2.162  |
| GRM2                              | 0.583  | 1.498 | 2.430 | 1.336  |
| GRM3                              | -0.244 | 0.844 | 7.632 | -0.966 |
| GRM5                              | 1.380  | 2.602 | 6.382 | 2.582  |
| GRM7//LOC100996542                | 0.646  | 1.565 | 3.396 | 1.886  |
| GRM8                              | 0.634  | 1.552 | 2.485 | 2.757  |
| GRN                               | -0.295 | 0.815 | 6.920 | -1.072 |
| GRPEL2                            | 0.611  | 1.527 | 5.391 | 2.073  |
| GRPR                              | 0.486  | 1.400 | 3.847 | 1.201  |
| GRTP1-AS1//LOC101930262//LOC10193 | -0.191 | 0.876 | 2.158 | -0.920 |
| GS1-115G20.1                      | 0.458  | 1.374 | 3.297 | 1.617  |
| GS1-259H13.2//ZNF655              | 0.362  | 1.285 | 2.935 | 1.077  |
| GS1-421I3.4                       | 0.659  | 1.579 | 2.293 | 2.556  |
| GS52                              | 0.479  | 1.393 | 2.139 | 1.604  |
| GSDMD                             | -0.097 | 0.935 | 2.976 | -0.425 |
| GSK3A                             | 0.423  | 1.341 | 6.365 | 1.869  |
| GSKIP                             | 0.208  | 1.155 | 4.453 | 1.027  |
| GSN                               | -0.941 | 0.521 | 6.339 | -2.911 |
| GSPT2                             | 0.427  | 1.345 | 3.597 | 1.890  |
| GSTA4                             | 0.353  | 1.277 | 6.542 | 1.605  |
| GSTM2                             | -0.279 | 0.824 | 5.233 | -0.904 |
| GSTM2P1                           | -0.373 | 0.772 | 2.300 | -1.267 |
| GSTM3                             | 0.752  | 1.685 | 5.424 | 2.598  |
| GSTM4                             | 0.304  | 1.235 | 4.110 | 1.201  |
| GSTM5                             | 0.455  | 1.370 | 5.932 | 0.838  |
| GSTT1                             | 0.108  | 1.078 | 4.612 | 0.173  |
| GSTT2                             | 1.245  | 2.370 | 4.910 | 1.884  |
| GSTT2//GSTT2B                     | 0.761  | 1.695 | 4.769 | 1.517  |
| GTDC1                             | 0.215  | 1.161 | 5.623 | 1.183  |
| GTF2H2C_2//GTF2H2C//GTF2H2//GTF2I | -0.588 | 0.665 | 6.335 | -2.339 |
| GTF2IRD2B//GTF2IRD2//GTF2IRD2P1   | -0.649 | 0.638 | 4.843 | -2.588 |
| GTF3C3                            | 0.012  | 1.008 | 5.771 | 0.053  |
| GTF3C4                            | 0.315  | 1.244 | 5.560 | 1.584  |
| GTPBP8                            | 0.020  | 1.014 | 3.434 | 0.073  |
| GUCA1B                            | 0.734  | 1.663 | 2.185 | 2.496  |
| GUCY1A2                           | 1.106  | 2.152 | 5.448 | 2.539  |

|                                   |        |       |       |        |
|-----------------------------------|--------|-------|-------|--------|
| GUCY1A3                           | 0.231  | 1.173 | 6.304 | 0.866  |
| GUCY1B3                           | 0.892  | 1.856 | 8.037 | 2.487  |
| GUF1                              | 0.189  | 1.140 | 6.020 | 0.714  |
| GULP1                             | 1.006  | 2.009 | 3.738 | 2.930  |
| GUSB                              | -0.435 | 0.740 | 4.864 | -1.751 |
| GUSBP1//LOC100996497//GUSBP4//LIN | -0.427 | 0.744 | 5.458 | -1.572 |
| GUSBP10                           | -0.688 | 0.621 | 2.078 | -2.377 |
| GUSBP2                            | -0.776 | 0.584 | 4.362 | -2.124 |
| GUSBP3                            | -0.220 | 0.859 | 4.946 | -0.579 |
| GUSBP3//SMA4//LOC653080//SMA5//C  | -0.568 | 0.675 | 7.713 | -1.942 |
| GUSBP3//SMA4//LOC653080//SMA5//C  | -0.624 | 0.649 | 7.302 | -2.090 |
| GUSBP4//XXbac-BPGBPG55C20.2       | 0.244  | 1.184 | 4.387 | 0.758  |
| GUSBP5                            | 0.524  | 1.438 | 3.802 | 2.188  |
| GUSBP9//GUSBP2//GUSBP3//SMA4//SN  | -0.476 | 0.719 | 8.676 | -1.611 |
| GVINP1                            | 0.086  | 1.061 | 2.729 | 0.321  |
| GXYLT2                            | -0.211 | 0.864 | 5.202 | -0.770 |
| GYG2                              | -0.972 | 0.510 | 5.502 | -2.574 |
| GYPC                              | -0.272 | 0.828 | 2.598 | -1.096 |
| GYS1                              | -0.288 | 0.819 | 5.030 | -1.182 |
| H19//MIR675//RPS12                | 0.246  | 1.186 | 2.982 | 0.735  |
| H2AFJ                             | -0.478 | 0.718 | 4.475 | -1.592 |
| H2AFX                             | -0.376 | 0.770 | 5.695 | -1.705 |
| H2AFZ                             | 0.473  | 1.388 | 4.786 | 2.178  |
| H3F3B//H3F3A//MIR4738             | -0.399 | 0.758 | 8.938 | -1.376 |
| H6PD                              | -0.207 | 0.866 | 3.495 | -0.799 |
| HAAO                              | -0.270 | 0.829 | 2.658 | -0.985 |
| HACE1                             | 0.339  | 1.265 | 6.047 | 1.767  |
| HADHB                             | -0.402 | 0.757 | 7.335 | -1.864 |
| HAGLR//HOXD-AS1                   | -0.916 | 0.530 | 2.712 | -2.957 |
| HAMP                              | 0.001  | 1.001 | 7.735 | 0.002  |
| HAP1                              | 0.654  | 1.573 | 4.359 | 1.547  |
| HAPLN2                            | -1.690 | 0.310 | 7.392 | -3.063 |
| HAPLN4//AC138430.4                | 1.440  | 2.712 | 4.695 | 2.134  |
| HAR1A                             | 0.292  | 1.225 | 2.592 | 1.176  |
| HAR1B                             | 0.411  | 1.330 | 2.654 | 1.129  |
| HARBI1                            | -0.394 | 0.761 | 3.803 | -1.682 |
| HAS2                              | -0.100 | 0.933 | 3.408 | -0.419 |
| HAUS4//MIR4707//RP11-29813.5      | -0.167 | 0.891 | 4.153 | -0.714 |
| HAVCR2                            | -0.502 | 0.706 | 5.548 | -1.478 |
| HBB                               | -0.306 | 0.809 | 2.471 | -1.074 |
| HBEGF                             | -0.505 | 0.705 | 4.895 | -1.708 |
| HBG1                              | -0.558 | 0.679 | 2.374 | -2.187 |
| HCAR3//GPR109B                    | 0.314  | 1.243 | 3.140 | 1.077  |
| HCCAT5                            | -0.288 | 0.819 | 3.389 | -1.147 |
| HCCS                              | 0.619  | 1.536 | 5.662 | 2.228  |
| HCG17                             | 0.240  | 1.181 | 3.813 | 1.063  |
| HCG18                             | 0.165  | 1.122 | 3.827 | 0.496  |
| HCG2040054//AC138655.4            | -0.407 | 0.754 | 2.236 | -1.587 |
| HCG22                             | -0.978 | 0.508 | 2.597 | -2.756 |
| HCG22                             | -1.012 | 0.496 | 2.809 | -2.707 |

|                        |        |       |       |        |
|------------------------|--------|-------|-------|--------|
| HCG22                  | -0.927 | 0.526 | 2.924 | -2.506 |
| HCG27//MICB            | -0.349 | 0.785 | 3.380 | -1.169 |
| HCG8                   | -0.615 | 0.653 | 3.373 | -1.934 |
| HCG8                   | -0.422 | 0.746 | 3.415 | -1.511 |
| HCK                    | -0.482 | 0.716 | 5.318 | -1.227 |
| HCLS1                  | -0.219 | 0.859 | 5.898 | -0.542 |
| HCN1                   | 2.045  | 4.128 | 6.266 | 2.433  |
| HCN3                   | 0.396  | 1.316 | 3.575 | 1.653  |
| HCN4                   | 0.659  | 1.579 | 3.616 | 1.941  |
| HCP5                   | 0.284  | 1.218 | 4.038 | 1.019  |
| HCP5                   | 0.201  | 1.149 | 3.775 | 0.654  |
| HCP5                   | -0.011 | 0.992 | 4.647 | -0.039 |
| HCRTR2                 | -0.027 | 0.981 | 3.255 | -0.095 |
| HCST                   | -0.292 | 0.817 | 4.384 | -0.701 |
| HDAC1                  | -0.733 | 0.602 | 5.529 | -3.169 |
| HDAC7                  | -0.035 | 0.976 | 4.050 | -0.168 |
| HDAC9                  | 0.101  | 1.073 | 4.627 | 0.462  |
| HDGFRP3//RP11-382A20.3 | 0.429  | 1.347 | 7.721 | 2.175  |
| HEATR5A//RP11-176H8.1  | -0.474 | 0.720 | 6.423 | -1.986 |
| HEBP2                  | -0.245 | 0.844 | 4.762 | -1.054 |
| HECTD2                 | 0.528  | 1.442 | 4.667 | 1.840  |
| HECW1                  | 1.340  | 2.531 | 5.025 | 2.845  |
| HECW1-IT1              | 0.811  | 1.754 | 2.694 | 2.153  |
| HECW2                  | 0.076  | 1.054 | 6.389 | 0.338  |
| HEG1                   | -0.301 | 0.812 | 7.778 | -0.878 |
| HELB                   | 0.072  | 1.051 | 2.703 | 0.277  |
| HELB                   | -0.015 | 0.990 | 2.299 | -0.066 |
| HELZ2                  | 0.015  | 1.011 | 2.304 | 0.074  |
| HENMT1                 | 0.115  | 1.083 | 4.329 | 0.439  |
| HEPACAM//HEPN1         | -0.880 | 0.543 | 7.256 | -3.160 |
| HEPN1                  | -0.542 | 0.687 | 4.212 | -1.763 |
| HERC1                  | 0.441  | 1.357 | 7.389 | 2.347  |
| HERC2P7                | -0.830 | 0.562 | 4.604 | -2.210 |
| HERC5                  | -0.539 | 0.688 | 3.737 | -2.512 |
| HERC6                  | 0.700  | 1.625 | 5.868 | 2.283  |
| HERPUD1                | 0.032  | 1.023 | 7.209 | 0.123  |
| HES1                   | 0.547  | 1.461 | 5.283 | 2.055  |
| HES4                   | -0.008 | 0.995 | 3.448 | -0.027 |
| HEXIM1                 | -0.052 | 0.965 | 5.735 | -0.201 |
| HEY1                   | 0.184  | 1.136 | 4.428 | 0.655  |
| HEY2                   | -0.763 | 0.589 | 5.828 | -2.291 |
| HEYL                   | -0.474 | 0.720 | 2.951 | -1.274 |
| HFE                    | -0.222 | 0.857 | 2.788 | -1.021 |
| HGF                    | 1.445  | 2.723 | 4.126 | 4.136  |
| HHATL                  | -0.894 | 0.538 | 7.081 | -2.080 |
| HHIP                   | -0.830 | 0.563 | 5.376 | -1.978 |
| HHIP-AS1               | -0.293 | 0.816 | 3.168 | -1.102 |
| HHIPL1                 | 0.374  | 1.296 | 4.082 | 1.476  |
| HIBCH                  | -0.834 | 0.561 | 4.770 | -3.138 |
| HID1                   | -0.178 | 0.884 | 5.288 | -0.720 |

|                                      |        |       |       |        |
|--------------------------------------|--------|-------|-------|--------|
| HIF1A                                | 0.155  | 1.114 | 8.861 | 0.667  |
| HIF1A-AS2                            | 0.205  | 1.152 | 3.139 | 0.484  |
| HIF1A-AS2                            | -0.006 | 0.996 | 2.962 | -0.013 |
| HIF3A                                | -0.499 | 0.708 | 4.685 | -1.503 |
| HIGD1B//EFTUD2                       | -0.539 | 0.688 | 4.093 | -2.064 |
| HILPDA                               | -0.031 | 0.979 | 7.211 | -0.059 |
| HIP1                                 | -0.927 | 0.526 | 6.756 | -2.813 |
| HIP1R                                | -0.849 | 0.555 | 5.898 | -2.759 |
| HIPK1-AS1//RP5-1073O3.7              | -0.593 | 0.663 | 2.675 | -1.959 |
| HIPK2                                | -0.615 | 0.653 | 9.837 | -2.260 |
| HIRA//C22orf39                       | -0.263 | 0.833 | 5.910 | -1.122 |
| HIST1H1C                             | -0.102 | 0.932 | 5.068 | -0.381 |
| HIST1H1E                             | -0.014 | 0.990 | 8.269 | -0.053 |
| HIST1H2AC                            | -0.971 | 0.510 | 6.433 | -3.823 |
| HIST1H2AE                            | 0.217  | 1.162 | 4.448 | 0.527  |
| HIST1H2AI//HIST1H2AK//HIST1H2AL//H   | -0.609 | 0.656 | 2.245 | -1.617 |
| HIST1H2AK                            | -0.319 | 0.801 | 4.778 | -0.669 |
| HIST1H2BB                            | -0.306 | 0.809 | 2.399 | -0.715 |
| HIST1H2BD                            | -0.025 | 0.983 | 3.829 | -0.069 |
| HIST1H2BF                            | -0.267 | 0.831 | 3.695 | -0.579 |
| HIST1H2BG//HIST1H2BF//HIST1H2BE//H   | -0.114 | 0.924 | 3.321 | -0.329 |
| HIST1H2BG//HIST1H2BJ                 | -0.146 | 0.904 | 4.682 | -0.237 |
| HIST1H2BH                            | -0.839 | 0.559 | 2.964 | -1.793 |
| HIST1H2BK                            | -0.213 | 0.863 | 5.871 | -0.668 |
| HIST1H2BM                            | -0.217 | 0.860 | 4.987 | -0.395 |
| HIST1H2BN                            | -0.114 | 0.924 | 2.983 | -0.285 |
| HIST1H2BO                            | 0.081  | 1.057 | 2.226 | 0.247  |
| HIST1H3A                             | 0.393  | 1.313 | 3.672 | 0.953  |
| HIST1H3E                             | -1.240 | 0.423 | 2.701 | -2.361 |
| HIST1H3F                             | -0.467 | 0.723 | 4.158 | -1.128 |
| HIST1H3I                             | -0.525 | 0.695 | 4.535 | -0.767 |
| HIST1H4B//HIST1H4I//HIST1H4A//HIST1  | -0.791 | 0.578 | 3.994 | -2.670 |
| HIST1H4D                             | 0.127  | 1.092 | 5.671 | 0.355  |
| HIST1H4H                             | -0.838 | 0.560 | 4.127 | -2.234 |
| HIST1H4K//HIST1H4J//HIST1H4I//HIST1I | 0.503  | 1.417 | 9.098 | 2.047  |
| HIST1H4L                             | -0.551 | 0.683 | 3.451 | -1.329 |
| HIST2H2AA4//HIST2H2AA3               | -0.393 | 0.761 | 7.750 | -1.008 |
| HIST2H2AC                            | -0.259 | 0.835 | 9.673 | -1.299 |
| HIST2H2BA                            | -0.301 | 0.811 | 6.633 | -1.287 |
| HIST2H2BC                            | -0.695 | 0.618 | 5.059 | -1.981 |
| HIST2H2BE                            | -0.870 | 0.547 | 5.040 | -2.542 |
| HIST2H2BF                            | -0.076 | 0.948 | 3.891 | -0.236 |
| HIST2H3D                             | -0.063 | 0.958 | 4.950 | -0.173 |
| HIST2H3PS2//RP5-998N21.10            | -0.694 | 0.618 | 4.450 | -2.242 |
| HIST2H4B//HIST2H4A//HIST1H4I//HIST1  | -0.776 | 0.584 | 5.631 | -2.072 |
| HIST3H2BB                            | 0.140  | 1.102 | 4.301 | 0.335  |
| HIVEP1                               | 0.387  | 1.307 | 4.990 | 1.730  |
| HIVEP2                               | 0.700  | 1.624 | 8.110 | 2.167  |
| HK1                                  | 0.637  | 1.555 | 6.770 | 2.278  |
| HK2                                  | -0.913 | 0.531 | 5.059 | -2.064 |

|                                  |        |       |       |        |
|----------------------------------|--------|-------|-------|--------|
| HLA-A                            | 0.272  | 1.207 | 4.671 | 1.055  |
| HLA-A                            | -0.127 | 0.916 | 5.499 | -0.533 |
| HLA-A                            | -0.085 | 0.943 | 7.420 | -0.304 |
| HLA-A                            | 0.028  | 1.019 | 7.322 | 0.112  |
| HLA-A                            | 0.019  | 1.013 | 4.245 | 0.067  |
| HLA-A                            | -0.019 | 0.987 | 6.575 | -0.038 |
| HLA-A//HLA-B//HLA-H              | -0.007 | 0.995 | 8.872 | -0.027 |
| HLA-B                            | 0.140  | 1.102 | 7.492 | 0.503  |
| HLA-B                            | 0.086  | 1.061 | 8.606 | 0.324  |
| HLA-B                            | 0.075  | 1.053 | 8.657 | 0.288  |
| HLA-C                            | -0.520 | 0.697 | 5.570 | -2.101 |
| HLA-C                            | -0.243 | 0.845 | 7.932 | -0.968 |
| HLA-C                            | -0.196 | 0.873 | 7.577 | -0.793 |
| HLA-C                            | 0.169  | 1.125 | 7.253 | 0.654  |
| HLA-C                            | -0.123 | 0.918 | 7.337 | -0.532 |
| HLA-C                            | 0.130  | 1.094 | 7.299 | 0.481  |
| HLA-DMA                          | -0.407 | 0.754 | 5.630 | -1.323 |
| HLA-DMA                          | -0.327 | 0.797 | 5.476 | -0.940 |
| HLA-DMA                          | -0.262 | 0.834 | 5.666 | -0.778 |
| HLA-DMB//HLA-DMA                 | -0.309 | 0.807 | 5.708 | -0.840 |
| HLA-DMB//HLA-DMA                 | -0.287 | 0.819 | 5.724 | -0.816 |
| HLA-DMB//HLA-DMA//XXbac-BPG181M  | -0.334 | 0.793 | 5.743 | -0.864 |
| HLA-DMB//HLA-DMA//XXbac-BPG181M  | -0.278 | 0.825 | 5.745 | -0.728 |
| HLA-DMB//XXbac-BPG181M17.5       | -0.451 | 0.731 | 5.454 | -1.104 |
| HLA-DMB//XXbac-BPG181M17.5       | -0.410 | 0.753 | 5.467 | -1.008 |
| HLA-DMB//XXbac-BPG181M17.5       | -0.376 | 0.771 | 4.686 | -0.955 |
| HLA-DOA                          | -0.522 | 0.696 | 5.127 | -1.730 |
| HLA-DOA                          | -0.422 | 0.746 | 4.733 | -1.299 |
| HLA-DOA                          | -0.403 | 0.756 | 3.331 | -1.281 |
| HLA-DOA                          | -0.423 | 0.746 | 4.700 | -1.270 |
| HLA-DOA                          | -0.408 | 0.754 | 3.424 | -1.242 |
| HLA-DPA1                         | -0.353 | 0.783 | 5.153 | -0.983 |
| HLA-DPA1                         | -0.345 | 0.787 | 5.142 | -0.952 |
| HLA-DPA1                         | -0.326 | 0.798 | 4.232 | -0.929 |
| HLA-DPA1                         | -0.339 | 0.791 | 5.358 | -0.904 |
| HLA-DPA1                         | -0.309 | 0.807 | 4.139 | -0.808 |
| HLA-DPB1                         | -0.352 | 0.783 | 7.614 | -0.954 |
| HLA-DPB1                         | -0.325 | 0.798 | 5.631 | -0.891 |
| HLA-DPB1                         | -0.233 | 0.851 | 6.806 | -0.666 |
| HLA-DPB1                         | -0.229 | 0.853 | 6.816 | -0.635 |
| HLA-DPB2                         | 0.360  | 1.284 | 3.709 | 1.093  |
| HLA-DQA1//LOC100509457           | -0.372 | 0.773 | 2.585 | -1.041 |
| HLA-DQA1//LOC100509457           | -0.263 | 0.833 | 2.438 | -0.941 |
| HLA-DQA1//LOC100509457           | -0.279 | 0.824 | 2.661 | -0.928 |
| HLA-DQA1//LOC100509457           | -0.125 | 0.917 | 5.233 | -0.277 |
| HLA-DQA1//LOC100509457           | 0.085  | 1.061 | 5.723 | 0.175  |
| HLA-DQA1//LOC100509457           | -0.085 | 0.943 | 5.045 | -0.168 |
| HLA-DQA2//HLA-DQA1//LOC100509457 | 0.145  | 1.105 | 4.080 | 0.391  |
| HLA-DQA2//HLA-DQA1//LOC100509457 | 0.124  | 1.090 | 4.691 | 0.337  |
| HLA-DQA2//HLA-DQA1//LOC100509457 | 0.126  | 1.091 | 5.293 | 0.332  |

|                                   |        |       |       |        |
|-----------------------------------|--------|-------|-------|--------|
| HLA-DQA2//HLA-DQA1//LOC100509457  | 0.109  | 1.078 | 4.700 | 0.302  |
| HLA-DQA2//HLA-DQA1//LOC100509457  | 0.105  | 1.076 | 4.879 | 0.294  |
| HLA-DQA2//HLA-DQA1//LOC100509457  | 0.109  | 1.079 | 4.914 | 0.292  |
| HLA-DQA2//HLA-DQA1//LOC100509457  | 0.075  | 1.054 | 5.572 | 0.221  |
| HLA-DQB1//LOC101060835            | -0.098 | 0.934 | 4.931 | -0.290 |
| HLA-DQB1-AS1//XXbac-BPG254F23.5   | -0.008 | 0.994 | 3.357 | -0.026 |
| HLA-DQB2                          | 0.197  | 1.146 | 3.048 | 0.756  |
| HLA-DQB2                          | 0.167  | 1.123 | 2.824 | 0.657  |
| HLA-DQB2                          | 0.101  | 1.073 | 2.789 | 0.403  |
| HLA-DQB2                          | 0.091  | 1.065 | 2.778 | 0.355  |
| HLA-DQB2                          | 0.046  | 1.033 | 2.819 | 0.170  |
| HLA-DRA                           | -0.100 | 0.933 | 8.107 | -0.171 |
| HLA-DRA//HLA-DQA1                 | -0.233 | 0.851 | 9.471 | -0.537 |
| HLA-DRA//HLA-DQA1                 | -0.221 | 0.858 | 9.494 | -0.505 |
| HLA-DRA//HLA-DQA1                 | -0.173 | 0.887 | 9.130 | -0.401 |
| HLA-DRA//HLA-DQA1                 | -0.171 | 0.888 | 9.349 | -0.389 |
| HLA-DRB1//LOC100996809            | 2.404  | 5.291 | 4.266 | 1.494  |
| HLA-DRB1//LOC100996809//HLA-DRB3/ | 0.028  | 1.020 | 4.042 | 0.089  |
| HLA-DRB1//LOC100996809//HLA-DRB3/ | -0.003 | 0.998 | 4.118 | -0.010 |
| HLA-DRB1//LOC100996809//HLA-DRB4/ | 0.132  | 1.096 | 7.156 | 0.404  |
| HLA-DRB3                          | 0.793  | 1.733 | 3.835 | 1.106  |
| HLA-DRB3                          | 0.051  | 1.036 | 6.330 | 0.153  |
| HLA-DRB3//HLA-DRB1//LOC100996809/ | 0.030  | 1.021 | 8.158 | 0.080  |
| HLA-DRB4                          | 0.104  | 1.075 | 6.699 | 0.172  |
| HLA-DRB4                          | 0.010  | 1.007 | 5.181 | 0.014  |
| HLA-DRB5                          | 2.204  | 4.609 | 4.521 | 1.384  |
| HLA-DRB6                          | 0.139  | 1.101 | 2.598 | 0.632  |
| HLA-E                             | 0.106  | 1.076 | 8.630 | 0.424  |
| HLA-E                             | 0.098  | 1.071 | 8.663 | 0.399  |
| HLA-F                             | 0.089  | 1.064 | 5.482 | 0.445  |
| HLA-F                             | -0.060 | 0.959 | 5.114 | -0.256 |
| HLA-F                             | -0.026 | 0.982 | 5.196 | -0.123 |
| HLA-F                             | -0.023 | 0.984 | 5.111 | -0.099 |
| HLA-G                             | -0.242 | 0.846 | 3.998 | -1.283 |
| HLA-G                             | -0.124 | 0.918 | 3.846 | -0.640 |
| HLA-G                             | -0.108 | 0.928 | 3.581 | -0.559 |
| HLA-L                             | -0.088 | 0.941 | 5.280 | -0.304 |
| HLF                               | 1.520  | 2.867 | 6.970 | 2.791  |
| HLX                               | -0.091 | 0.939 | 2.521 | -0.428 |
| HMBX1-IT1                         | -0.134 | 0.911 | 2.444 | -0.429 |
| HMCES//C3orf37                    | 0.427  | 1.345 | 5.874 | 1.962  |
| HMG20B                            | -0.548 | 0.684 | 4.025 | -2.450 |
| HMGA1//HMGA1P8                    | 0.261  | 1.198 | 6.237 | 0.859  |
| HMGB2                             | -0.360 | 0.779 | 3.238 | -1.224 |
| HMGCL                             | -0.033 | 0.978 | 4.377 | -0.131 |
| HMGCR                             | 0.369  | 1.291 | 7.102 | 1.310  |
| HMGCS1                            | 0.345  | 1.270 | 6.481 | 1.072  |
| HMGN1//LOC101927733               | -0.485 | 0.715 | 3.959 | -1.729 |
| HMGN2                             | -0.383 | 0.767 | 3.141 | -1.221 |
| HMGN5                             | 0.025  | 1.017 | 4.527 | 0.102  |

|                                  |        |       |       |        |
|----------------------------------|--------|-------|-------|--------|
| HMHA1                            | -0.549 | 0.683 | 4.486 | -1.854 |
| HMOX1                            | -0.424 | 0.745 | 5.164 | -1.298 |
| HMP19                            | 0.757  | 1.690 | 3.888 | 2.539  |
| HMSD                             | -0.736 | 0.600 | 3.598 | -2.246 |
| HMX3                             | -0.170 | 0.889 | 2.479 | -0.620 |
| HN1                              | 0.457  | 1.373 | 5.298 | 1.742  |
| HN1L                             | -1.513 | 0.350 | 6.028 | -2.928 |
| HNMT                             | -0.462 | 0.726 | 4.523 | -1.804 |
| HNRNPA1L2//MRPS31P4              | 0.070  | 1.049 | 3.166 | 0.172  |
| HNRNPLL                          | 0.395  | 1.315 | 4.341 | 1.868  |
| HNRNPU-AS1                       | -0.124 | 0.918 | 6.208 | -0.447 |
| HOGA1                            | -0.491 | 0.711 | 2.566 | -1.584 |
| HOMER1                           | 1.024  | 2.033 | 5.935 | 2.835  |
| HOMER3                           | -0.502 | 0.706 | 4.629 | -1.886 |
| HOOK1                            | 1.801  | 3.484 | 3.404 | 2.660  |
| HOTAIRM1                         | -1.042 | 0.486 | 3.595 | -2.579 |
| HOXA1                            | -0.553 | 0.682 | 2.580 | -2.087 |
| HOXA10//HOXA9//MIR196B           | -0.104 | 0.930 | 2.586 | -0.333 |
| HOXA10-AS//MIR196B//HOXA-AS4     | -0.216 | 0.861 | 2.916 | -0.759 |
| HOXA2                            | -1.647 | 0.319 | 3.690 | -2.515 |
| HOXA4                            | -1.122 | 0.459 | 3.457 | -1.756 |
| HOXA5                            | -1.942 | 0.260 | 4.606 | -2.768 |
| HOXA6                            | -0.397 | 0.760 | 3.705 | -1.165 |
| HOXA7                            | -0.412 | 0.752 | 3.783 | -1.447 |
| HOXB2                            | -0.908 | 0.533 | 3.826 | -2.103 |
| HOXB3                            | -0.418 | 0.749 | 2.826 | -1.096 |
| HOXB4                            | -0.329 | 0.796 | 3.201 | -0.917 |
| HOXB5                            | -1.327 | 0.399 | 3.386 | -2.262 |
| HOXB6                            | -0.407 | 0.754 | 3.614 | -1.257 |
| HOXB7                            | -0.231 | 0.852 | 2.499 | -0.862 |
| HOXB8                            | -0.047 | 0.968 | 3.407 | -0.131 |
| HOXB9                            | 0.094  | 1.068 | 3.790 | 0.258  |
| HOXB-AS3                         | -0.672 | 0.628 | 2.494 | -2.139 |
| HOXC10                           | 0.529  | 1.443 | 3.553 | 1.711  |
| HOXC6//HOXC4//HOXC5//RP11-834C11 | -0.377 | 0.770 | 2.419 | -1.867 |
| HOXC8                            | 0.081  | 1.057 | 3.914 | 0.340  |
| HOXC9                            | 0.147  | 1.107 | 2.560 | 0.710  |
| HOXC-AS1                         | -0.273 | 0.828 | 2.322 | -0.921 |
| HOXC-AS2                         | -0.348 | 0.786 | 3.193 | -1.269 |
| HOXD1                            | -1.204 | 0.434 | 3.356 | -2.864 |
| HOXD10                           | 0.134  | 1.098 | 2.578 | 0.318  |
| HOXD3//HOXD4//LOC401021          | -1.103 | 0.465 | 3.166 | -2.570 |
| HOXD4                            | -0.624 | 0.649 | 3.294 | -1.612 |
| HOXD4//HOXD3//LOC401021          | -0.645 | 0.640 | 3.615 | -1.638 |
| HOXD8                            | -0.291 | 0.817 | 2.992 | -1.096 |
| HP                               | -0.137 | 0.910 | 3.528 | -0.151 |
| HPCAL1                           | 0.078  | 1.055 | 3.413 | 0.330  |
| HPCAL4                           | 1.103  | 2.148 | 5.978 | 2.747  |
| HPD                              | -0.293 | 0.816 | 2.127 | -1.162 |
| HPGDS                            | -0.554 | 0.681 | 3.603 | -1.185 |



|                        |        |       |        |        |
|------------------------|--------|-------|--------|--------|
| HPN                    | -0.495 | 0.710 | 3.535  | -1.708 |
| HPN-AS1                | -0.344 | 0.788 | 3.016  | -1.056 |
| HPRT1                  | 0.782  | 1.720 | 6.058  | 2.744  |
| HPS3                   | -0.381 | 0.768 | 7.223  | -1.596 |
| HPS5                   | -0.320 | 0.801 | 5.754  | -1.229 |
| HPS6                   | -0.183 | 0.881 | 2.173  | -0.736 |
| HPSE                   | -0.057 | 0.961 | 3.189  | -0.167 |
| HPSE2                  | -0.484 | 0.715 | 5.326  | -1.122 |
| HR                     | 0.108  | 1.077 | 3.478  | 0.409  |
| HRASLS                 | -0.038 | 0.974 | 3.089  | -0.140 |
| HRASLS5                | -0.103 | 0.931 | 5.311  | -0.327 |
| HRH2                   | 0.828  | 1.776 | 3.967  | 2.983  |
| HRH3                   | 1.064  | 2.091 | 4.317  | 2.247  |
| HRK                    | 0.604  | 1.520 | 2.328  | 2.339  |
| HS2ST1//RP5-1052I5.2   | 0.580  | 1.495 | 6.049  | 2.597  |
| HS3ST2                 | 1.221  | 2.331 | 3.220  | 3.231  |
| HS3ST3B1               | 0.020  | 1.014 | 2.854  | 0.047  |
| HS3ST4                 | 0.338  | 1.264 | 2.259  | 1.071  |
| HS3ST5                 | -0.499 | 0.708 | 5.327  | -1.452 |
| HS6ST1                 | 0.140  | 1.102 | 3.755  | 0.512  |
| HS6ST2                 | 0.288  | 1.221 | 3.114  | 0.974  |
| HS6ST3                 | 1.071  | 2.101 | 6.228  | 2.057  |
| HSD11B1                | 0.149  | 1.109 | 4.161  | 0.501  |
| HSD11B1L               | 0.751  | 1.683 | 5.029  | 2.677  |
| HSD11B2                | 0.161  | 1.118 | 2.605  | 0.519  |
| HSD17B1                | -0.462 | 0.726 | 3.486  | -1.543 |
| HSD17B1//RP11-400F19.6 | 0.325  | 1.253 | 5.105  | 1.347  |
| HSD17B10               | -0.633 | 0.645 | 5.120  | -2.911 |
| HSD17B13               | 0.490  | 1.404 | 2.266  | 2.008  |
| HSD17B14               | 0.241  | 1.182 | 4.760  | 1.111  |
| HSD17B1P1              | -0.115 | 0.923 | 3.568  | -0.392 |
| HSD17B3                | -0.773 | 0.585 | 3.327  | -2.016 |
| HSD17B6                | 0.397  | 1.317 | 3.193  | 1.538  |
| HSD17B7P2              | 0.065  | 1.046 | 5.471  | 0.264  |
| HSD17B8                | -0.186 | 0.879 | 3.598  | -0.681 |
| HSD3B7                 | -0.008 | 0.995 | 3.635  | -0.032 |
| HSDL1                  | 0.496  | 1.411 | 7.020  | 1.803  |
| HSF2                   | 0.470  | 1.385 | 5.092  | 1.810  |
| HSF4                   | 0.054  | 1.038 | 4.169  | 0.187  |
| HSFX2//HSFX1           | 0.648  | 1.567 | 3.613  | 1.863  |
| HSFX2//HSFX1           | 0.259  | 1.197 | 4.793  | 0.952  |
| HSP90AB3P              | 0.403  | 1.322 | 5.316  | 1.006  |
| HSP90AB4P              | -0.606 | 0.657 | 2.601  | -1.646 |
| HSPA12A                | 0.365  | 1.288 | 7.258  | 1.112  |
| HSPA12A//RP11-498B4.5  | 0.569  | 1.484 | 2.205  | 2.427  |
| HSPA12B                | 0.231  | 1.174 | 3.080  | 0.829  |
| HSPA14                 | 0.215  | 1.161 | 4.410  | 0.996  |
| HSPA1A//HSPA1B//HSPA1L | -0.674 | 0.627 | 10.751 | -2.149 |
| HSPA1A//HSPA1B//HSPA1L | -0.664 | 0.631 | 10.836 | -2.132 |
| HSPA1A//HSPA1B//HSPA1L | -0.673 | 0.627 | 10.322 | -2.031 |

|                             |        |       |        |        |
|-----------------------------|--------|-------|--------|--------|
| HSPA1A//HSPA1B//HSPA1L      | -0.631 | 0.646 | 10.031 | -1.937 |
| HSPA1B//HSPA1A//HSPA1L      | -0.629 | 0.647 | 10.505 | -2.013 |
| HSPA1B//HSPA1A//HSPA1L      | -0.605 | 0.657 | 10.198 | -1.956 |
| HSPA1B//HSPA1A//HSPA1L      | -0.614 | 0.653 | 10.116 | -1.853 |
| HSPA1B//HSPA1A//HSPA1L      | -0.614 | 0.653 | 10.094 | -1.799 |
| HSPA1L                      | -0.246 | 0.843 | 4.528  | -0.923 |
| HSPA1L                      | -0.175 | 0.886 | 4.806  | -0.657 |
| HSPA2                       | -1.259 | 0.418 | 8.820  | -3.128 |
| HSPA4L                      | 0.282  | 1.216 | 6.997  | 0.958  |
| HSPA5                       | -0.304 | 0.810 | 9.479  | -1.112 |
| HSPA6                       | -0.476 | 0.719 | 3.039  | -1.186 |
| HSPA7                       | 0.095  | 1.068 | 2.580  | 0.222  |
| HSPB1                       | -0.367 | 0.775 | 9.423  | -0.975 |
| HSPB3                       | 1.078  | 2.111 | 2.145  | 2.332  |
| HSPB6                       | -0.497 | 0.709 | 5.515  | -1.556 |
| HSPB7                       | -0.427 | 0.744 | 2.581  | -1.790 |
| HSPB8                       | -0.131 | 0.913 | 5.241  | -0.518 |
| HSPG2                       | -0.170 | 0.889 | 4.030  | -0.768 |
| HSPH1                       | 0.239  | 1.180 | 8.690  | 0.662  |
| HTATIP2                     | -0.452 | 0.731 | 5.338  | -1.366 |
| HTR1A                       | 0.687  | 1.610 | 3.286  | 1.265  |
| HTR1B                       | 0.952  | 1.935 | 3.328  | 2.414  |
| HTR1E                       | 1.683  | 3.212 | 3.327  | 3.031  |
| HTR1F                       | 0.965  | 1.951 | 2.658  | 2.591  |
| HTR2A                       | 1.779  | 3.432 | 6.275  | 3.030  |
| HTR2C                       | -0.501 | 0.706 | 3.909  | -0.773 |
| HTR3B                       | 0.890  | 1.853 | 2.856  | 1.743  |
| HTR4                        | 0.310  | 1.239 | 3.115  | 1.169  |
| HTR5A                       | 0.990  | 1.987 | 4.418  | 2.056  |
| HTR5AOS//AC093726.4         | 1.201  | 2.299 | 3.634  | 2.528  |
| HTRA4                       | -0.417 | 0.749 | 2.396  | -1.655 |
| HUNK                        | 1.221  | 2.331 | 3.601  | 2.829  |
| HVCN1                       | -0.447 | 0.734 | 3.664  | -1.678 |
| HYAL1                       | -0.188 | 0.878 | 2.845  | -0.648 |
| HYDIN//HYDIN2//LOC101930373 | -0.550 | 0.683 | 3.281  | -2.017 |
| HYDIN//HYDIN2//LOC101930373 | -0.141 | 0.907 | 4.650  | -0.461 |
| HYI                         | -0.366 | 0.776 | 4.727  | -1.525 |
| IBA57-AS1//C1orf148         | -0.288 | 0.819 | 3.276  | -1.143 |
| ICA1                        | 1.029  | 2.041 | 3.588  | 2.949  |
| ICA1L                       | 0.549  | 1.463 | 5.107  | 2.613  |
| ICAM1                       | 0.347  | 1.272 | 5.086  | 1.024  |
| ICAM2                       | 0.288  | 1.221 | 5.649  | 1.009  |
| ICAM3                       | 0.413  | 1.331 | 3.133  | 1.514  |
| ICAM5                       | 1.593  | 3.018 | 3.362  | 2.773  |
| ICE1//CTC-501N16.1          | 0.114  | 1.082 | 5.644  | 0.534  |
| ICOSLG                      | -0.647 | 0.639 | 4.831  | -2.139 |
| ID1                         | 0.484  | 1.399 | 6.316  | 1.377  |
| ID2                         | 0.271  | 1.207 | 4.062  | 0.982  |
| ID3                         | -0.350 | 0.785 | 4.554  | -1.049 |
| ID4                         | -0.031 | 0.979 | 6.174  | -0.117 |

|                           |        |       |       |        |
|---------------------------|--------|-------|-------|--------|
| IDH3A                     | 0.400  | 1.319 | 3.296 | 1.947  |
| IDI2-AS1                  | 0.137  | 1.100 | 3.861 | 0.641  |
| IDS                       | 0.486  | 1.401 | 8.599 | 1.960  |
| IER2                      | 0.119  | 1.086 | 4.546 | 0.537  |
| IER3                      | -0.022 | 0.985 | 4.695 | -0.062 |
| IER3                      | -0.011 | 0.992 | 4.722 | -0.030 |
| IER3                      | 0.010  | 1.007 | 5.144 | 0.029  |
| IER3IP1//RP11-49K24.6     | 0.445  | 1.362 | 5.263 | 1.870  |
| IER5                      | 0.494  | 1.408 | 4.913 | 1.251  |
| IER5L//MGAT2              | 0.345  | 1.270 | 3.946 | 0.868  |
| IFI16                     | -0.309 | 0.807 | 7.478 | -1.070 |
| IFI27                     | -0.082 | 0.945 | 3.648 | -0.337 |
| IFI30//PIK3R2//AC007192.4 | -0.106 | 0.929 | 5.916 | -0.177 |
| IFI35                     | 0.307  | 1.237 | 4.789 | 1.011  |
| IFI44                     | -0.473 | 0.721 | 3.920 | -1.412 |
| IFI44L                    | -0.147 | 0.903 | 4.527 | -0.376 |
| IFI6                      | 1.164  | 2.241 | 8.223 | 2.430  |
| IFIH1                     | 0.134  | 1.097 | 3.479 | 0.527  |
| IFIT1                     | 0.581  | 1.496 | 4.893 | 1.897  |
| IFIT2                     | -0.716 | 0.609 | 4.444 | -2.592 |
| IFIT3                     | 0.428  | 1.345 | 3.999 | 1.150  |
| IFITM1                    | 0.481  | 1.395 | 7.494 | 1.410  |
| IFITM2                    | 0.308  | 1.238 | 8.026 | 0.726  |
| IFITM3                    | 0.258  | 1.196 | 4.924 | 0.825  |
| IFITM4P                   | 0.303  | 1.233 | 3.030 | 0.977  |
| IFITM4P                   | 0.342  | 1.268 | 3.755 | 0.975  |
| IFITM4P                   | 0.319  | 1.247 | 3.942 | 0.817  |
| IFITM4P                   | 0.307  | 1.237 | 4.468 | 0.781  |
| IFITM4P                   | -0.125 | 0.917 | 3.777 | -0.373 |
| IFNA14                    | 0.106  | 1.076 | 2.986 | 0.399  |
| IFNGR1                    | -0.544 | 0.686 | 5.590 | -2.222 |
| IFRD2                     | -0.370 | 0.774 | 3.330 | -1.472 |
| IFT57                     | 0.509  | 1.423 | 5.907 | 2.410  |
| IFT80//RP11-432B6.3       | 1.107  | 2.154 | 1.841 | 2.870  |
| IFT80//RP11-432B6.3       | -0.110 | 0.927 | 6.223 | -0.453 |
| IGANRP                    | -0.377 | 0.770 | 3.321 | -0.953 |
| IGDCC4                    | -0.265 | 0.832 | 4.283 | -1.035 |
| IGF1                      | 0.561  | 1.475 | 3.405 | 2.329  |
| IGF2BP2                   | -0.269 | 0.830 | 2.986 | -1.096 |
| IGFALS                    | 0.261  | 1.199 | 2.901 | 1.048  |
| IGFBP2                    | 0.482  | 1.396 | 3.092 | 1.632  |
| IGFBP3                    | 0.104  | 1.075 | 4.460 | 0.244  |
| IGFBP4                    | 0.603  | 1.519 | 5.114 | 1.144  |
| IGFBP5                    | -0.531 | 0.692 | 6.747 | -1.495 |
| IGFBP6                    | -0.029 | 0.980 | 4.340 | -0.080 |
| IGFBP7                    | 0.262  | 1.199 | 8.443 | 1.081  |
| IGFBPL1                   | 0.586  | 1.501 | 2.349 | 1.889  |
| IGFL4                     | 0.350  | 1.275 | 3.089 | 1.216  |
| IGFLR1//AD000671.6        | -0.439 | 0.738 | 3.952 | -1.432 |
| IGHA2                     | 0.139  | 1.101 | 3.813 | 0.421  |

|                                     |        |       |       |        |
|-------------------------------------|--------|-------|-------|--------|
| IGHD2-15                            | 0.013  | 1.009 | 4.422 | 0.042  |
| IGHG4//IGHG1                        | -0.049 | 0.966 | 2.603 | -0.201 |
| IGHJ1//SKAP2//IGHG1                 | -0.243 | 0.845 | 2.902 | -0.721 |
| IGHJ2//SKAP2//IGHG1//IGHD           | -0.108 | 0.928 | 2.815 | -0.361 |
| IGHJ3//SKAP2//IGHG1//IGHA1//IGH//IG | -0.003 | 0.998 | 3.245 | -0.006 |
| IGHM//IGHG1                         | -0.461 | 0.727 | 2.692 | -1.129 |
| IGHV1-24                            | 0.716  | 1.642 | 2.283 | 2.311  |
| IGHV4-34//SKAP2//IGHG1              | -0.620 | 0.651 | 2.572 | -1.946 |
| IGIP                                | 0.320  | 1.248 | 6.259 | 1.578  |
| IGKJ5//IGKC                         | -0.932 | 0.524 | 3.249 | -2.609 |
| IGKV1-16//IGKC                      | 0.245  | 1.185 | 2.546 | 0.814  |
| IGKV1-17                            | 0.219  | 1.164 | 2.533 | 0.715  |
| IGKV1D-16//IGKC                     | -0.137 | 0.909 | 3.001 | -0.421 |
| IGKV1OR2-3//IGKV1-12//IGKC          | -0.777 | 0.584 | 2.416 | -2.340 |
| IGKV3-15//IGKC                      | -0.750 | 0.594 | 2.662 | -2.868 |
| IGLJ2                               | 0.126  | 1.091 | 4.768 | 0.455  |
| IGLJ4                               | 0.108  | 1.077 | 3.037 | 0.336  |
| IGLL3P                              | -0.566 | 0.675 | 2.650 | -1.469 |
| IGLON5                              | 0.247  | 1.187 | 4.730 | 0.521  |
| IGLV@//IGHG1//IGLC1//IGLJ3//IGLC2   | 0.511  | 1.425 | 3.067 | 1.210  |
| IGLV2-11                            | -0.278 | 0.825 | 3.012 | -0.801 |
| IGLV2-23//IGLC1                     | -0.278 | 0.825 | 3.328 | -1.018 |
| IGLV2-8                             | -0.091 | 0.939 | 4.182 | -0.357 |
| IGLV3-10//IGLC1                     | -0.399 | 0.758 | 2.653 | -1.440 |
| IGLV3-25                            | 0.144  | 1.105 | 2.760 | 0.389  |
| IGLV3-27                            | 0.342  | 1.267 | 2.013 | 0.936  |
| IGSF1                               | -0.506 | 0.704 | 3.661 | -1.664 |
| IGSF11                              | -0.535 | 0.690 | 5.410 | -2.052 |
| IGSF21                              | 0.676  | 1.597 | 5.708 | 2.387  |
| IGSF3                               | 0.448  | 1.364 | 4.801 | 1.672  |
| IGSF6                               | -0.063 | 0.957 | 4.493 | -0.167 |
| IGSF9B                              | 0.434  | 1.351 | 4.433 | 1.661  |
| IKBIP                               | -0.046 | 0.968 | 2.330 | -0.169 |
| IKBKAP                              | -0.075 | 0.949 | 7.021 | -0.370 |
| IKBKB                               | -0.363 | 0.778 | 5.650 | -1.565 |
| IKBKE                               | -0.350 | 0.785 | 3.057 | -1.205 |
| IKZF1                               | -0.437 | 0.739 | 3.140 | -1.640 |
| IKZF2                               | -0.606 | 0.657 | 3.815 | -2.116 |
| IL10RA                              | -0.415 | 0.750 | 4.658 | -1.226 |
| IL10RB//AP000295.9                  | -0.556 | 0.680 | 4.641 | -2.226 |
| IL10RB-AS1                          | -0.071 | 0.952 | 1.890 | -0.228 |
| IL11RA                              | -0.436 | 0.739 | 4.206 | -1.636 |
| IL12RB1                             | -0.050 | 0.966 | 2.042 | -0.224 |
| IL12RB2                             | 1.354  | 2.555 | 2.381 | 2.903  |
| IL13RA1                             | -0.204 | 0.868 | 6.730 | -0.646 |
| IL16                                | -0.223 | 0.857 | 3.250 | -1.079 |
| IL17D                               | -0.356 | 0.782 | 4.314 | -1.302 |
| IL17RA                              | -0.609 | 0.656 | 6.943 | -1.907 |
| IL17RD                              | -0.214 | 0.862 | 4.944 | -0.856 |
| IL18                                | -0.413 | 0.751 | 4.610 | -1.132 |

|                     |        |       |       |        |
|---------------------|--------|-------|-------|--------|
| IL18BP              | -0.133 | 0.912 | 4.462 | -0.488 |
| IL18R1              | 0.070  | 1.049 | 3.165 | 0.253  |
| IL1A                | -0.261 | 0.835 | 1.985 | -0.888 |
| IL1B                | 0.279  | 1.213 | 2.843 | 0.770  |
| IL1R1               | 0.576  | 1.491 | 5.034 | 1.804  |
| IL1R2               | -0.348 | 0.785 | 2.450 | -0.762 |
| IL1RAP              | 0.305  | 1.236 | 3.250 | 1.157  |
| IL1RAPL1            | -0.228 | 0.854 | 6.241 | -0.840 |
| IL1RAPL2            | 1.187  | 2.276 | 1.533 | 3.784  |
| IL1RL1              | 0.822  | 1.768 | 4.158 | 1.761  |
| IL20RA              | -0.018 | 0.987 | 2.189 | -0.076 |
| IL21R               | -0.027 | 0.982 | 2.237 | -0.100 |
| IL23A//TRBJ2-6      | -0.337 | 0.792 | 3.097 | -0.705 |
| IL2RA               | -0.071 | 0.952 | 2.496 | -0.200 |
| IL2RG               | 0.000  | 1.000 | 3.018 | 0.000  |
| IL32                | 0.030  | 1.021 | 2.252 | 0.136  |
| IL33                | 0.421  | 1.339 | 4.369 | 1.279  |
| IL34                | 0.409  | 1.327 | 3.814 | 1.066  |
| IL3RA               | -0.395 | 0.761 | 3.616 | -1.462 |
| IL3RA               | -0.258 | 0.836 | 4.152 | -0.935 |
| IL4R                | 0.106  | 1.076 | 5.724 | 0.305  |
| IL6R                | -0.344 | 0.788 | 5.379 | -1.712 |
| IL7R                | -0.491 | 0.711 | 2.804 | -1.610 |
| ILDR2               | 0.686  | 1.609 | 5.110 | 2.004  |
| IMPA1               | 0.440  | 1.356 | 6.513 | 1.884  |
| IMPACT              | -0.238 | 0.848 | 6.062 | -1.074 |
| IMPG2               | -0.178 | 0.884 | 2.856 | -0.773 |
| INA                 | 1.150  | 2.218 | 7.951 | 1.387  |
| INF2                | -0.512 | 0.701 | 5.724 | -2.004 |
| INHBA               | -0.020 | 0.986 | 2.777 | -0.088 |
| INHBA-AS1           | 0.592  | 1.507 | 1.967 | 1.775  |
| INHBB               | -0.319 | 0.802 | 4.337 | -1.164 |
| INIP                | -0.029 | 0.980 | 6.085 | -0.132 |
| INO80C              | -0.268 | 0.831 | 3.875 | -1.114 |
| INPP4A              | 0.474  | 1.389 | 7.167 | 1.867  |
| INPP4B              | 0.577  | 1.492 | 3.743 | 2.406  |
| INPP5A              | 0.215  | 1.161 | 6.725 | 1.106  |
| INPP5D              | -0.660 | 0.633 | 6.104 | -2.235 |
| INPP5E              | 0.244  | 1.184 | 4.630 | 0.923  |
| INPP5F              | 0.155  | 1.114 | 7.444 | 0.588  |
| INPP5J              | 0.044  | 1.031 | 2.636 | 0.188  |
| INPPL1              | -0.235 | 0.850 | 5.987 | -1.160 |
| INS//IGF2//INS-IGF2 | 0.126  | 1.091 | 2.340 | 0.528  |
| INSIG1              | 0.100  | 1.072 | 7.295 | 0.365  |
| INSIG2              | 0.363  | 1.286 | 5.679 | 1.415  |
| INSM1               | 0.061  | 1.043 | 2.952 | 0.216  |
| INTS4L1             | -0.053 | 0.964 | 2.173 | -0.126 |
| INTS5               | 0.251  | 1.190 | 4.348 | 1.010  |
| INTS7               | -0.338 | 0.791 | 4.889 | -1.656 |
| IP6K1               | 0.274  | 1.209 | 6.472 | 1.424  |

|                                 |        |       |       |        |
|---------------------------------|--------|-------|-------|--------|
| IP6K3                           | -1.086 | 0.471 | 4.731 | -2.501 |
| IPCEF1//CNKSR3                  | 1.397  | 2.634 | 5.180 | 2.641  |
| IPO11                           | 0.084  | 1.060 | 5.283 | 0.415  |
| IPO13                           | -0.594 | 0.662 | 6.487 | -2.544 |
| IPO5P1//RP11-15H20.6            | -0.141 | 0.907 | 3.833 | -0.634 |
| IPO9                            | 0.277  | 1.212 | 7.044 | 1.251  |
| IPW//SNORD107//PWARSN//SNORD11€ | 0.207  | 1.154 | 3.793 | 0.502  |
| IPW//SNORD107//PWARSN//SNORD11€ | -0.014 | 0.991 | 4.917 | -0.034 |
| IPW//SNORD107//PWARSN//SNORD11€ | 0.087  | 1.062 | 6.241 | 0.360  |
| IPW//SNORD107//PWARSN//SNORD11€ | 0.006  | 1.004 | 5.867 | 0.017  |
| IPW//SNORD107//PWARSN//SNORD11€ | 0.831  | 1.779 | 4.076 | 2.616  |
| IPW//SNORD107//PWARSN//SNORD11€ | 0.845  | 1.797 | 3.475 | 2.613  |
| IPW//SNORD107//PWARSN//SNORD11€ | 0.581  | 1.496 | 3.876 | 2.164  |
| IPW//SNORD107//PWARSN//SNORD11€ | 0.515  | 1.429 | 2.425 | 1.387  |
| IPW//SNORD107//PWARSN//SNORD11€ | -0.290 | 0.818 | 5.150 | -1.043 |
| IPW//SNORD107//PWARSN//SNORD11€ | 0.285  | 1.218 | 2.821 | 0.730  |
| IPW//SNORD107//PWARSN//SNORD11€ | -0.145 | 0.904 | 8.670 | -0.535 |
| IPW//SNORD107//PWARSN//SNORD11€ | 0.151  | 1.111 | 3.353 | 0.526  |
| IPW//SNORD107//PWARSN//SNORD11€ | -0.124 | 0.918 | 8.109 | -0.462 |
| IPW//SNORD107//PWARSN//SNORD11€ | 0.141  | 1.103 | 3.149 | 0.457  |
| IPW//SNORD107//PWARSN//SNORD11€ | 0.130  | 1.094 | 7.137 | 0.450  |
| IPW//SNORD107//PWARSN//SNORD11€ | -0.120 | 0.920 | 9.250 | -0.442 |
| IPW//SNORD107//PWARSN//SNORD11€ | -0.090 | 0.939 | 5.798 | -0.342 |
| IPW//SNORD107//PWARSN//SNORD11€ | -0.087 | 0.941 | 8.709 | -0.330 |
| IPW//SNORD107//PWARSN//SNORD11€ | -0.085 | 0.942 | 7.336 | -0.313 |
| IPW//SNORD107//PWARSN//SNORD11€ | -0.083 | 0.944 | 6.014 | -0.260 |
| IPW//SNORD107//PWARSN//SNORD11€ | 0.061  | 1.043 | 7.233 | 0.215  |
| IPW//SNORD107//PWARSN//SNORD11€ | 0.053  | 1.037 | 8.409 | 0.189  |
| IPW//SNORD107//PWARSN//SNORD11€ | 0.039  | 1.028 | 6.953 | 0.150  |
| IPW//SNORD107//PWARSN//SNORD11€ | -0.030 | 0.979 | 6.324 | -0.124 |
| IPW//SNORD107//PWARSN//SNORD11€ | -0.004 | 0.997 | 7.559 | -0.014 |
| IPW//SNORD107//PWARSN//SNORD11€ | -0.363 | 0.778 | 5.782 | -1.133 |
| IQCA1                           | 0.255  | 1.193 | 5.119 | 1.017  |
| IQCJ//IQCJ-SCHIP1//SCHIP1       | 0.202  | 1.150 | 3.685 | 0.846  |
| IQGAP1                          | -0.627 | 0.647 | 7.515 | -2.168 |
| IQGAP2                          | -0.032 | 0.978 | 3.198 | -0.109 |
| IQSEC1                          | 0.491  | 1.405 | 7.182 | 1.925  |
| IQSEC2                          | 0.993  | 1.990 | 4.958 | 2.774  |
| IQSEC3                          | 1.030  | 2.042 | 4.400 | 2.164  |
| IQUB                            | 0.608  | 1.524 | 3.907 | 2.058  |
| IRAK1                           | 0.027  | 1.019 | 4.836 | 0.131  |
| IRAK1BP1//RP11-173D14.1         | -0.176 | 0.885 | 3.471 | -0.737 |
| IRAK3                           | -0.062 | 0.958 | 5.310 | -0.197 |
| IRAK4                           | -0.490 | 0.712 | 3.594 | -1.765 |
| IREB2                           | 0.388  | 1.309 | 6.534 | 1.738  |
| IRF1                            | 0.223  | 1.167 | 3.451 | 0.747  |
| IRF2BP2                         | -0.444 | 0.735 | 6.206 | -1.522 |
| IRF7                            | -0.333 | 0.794 | 3.247 | -1.450 |
| IRF8                            | -0.335 | 0.793 | 4.753 | -0.946 |
| IRF9//RP11-468E2.4              | -0.373 | 0.772 | 5.599 | -1.532 |

|                           |        |       |       |        |
|---------------------------|--------|-------|-------|--------|
| IRF9//RP11-468E2.4//RNF31 | -0.198 | 0.872 | 2.676 | -0.687 |
| IRGQ                      | 0.330  | 1.257 | 5.026 | 1.437  |
| IRS1                      | 0.401  | 1.321 | 3.368 | 1.488  |
| IRS2                      | -0.111 | 0.926 | 7.337 | -0.401 |
| IRX1                      | -0.478 | 0.718 | 2.668 | -1.440 |
| IRX2                      | -0.254 | 0.838 | 2.067 | -1.015 |
| IRX3                      | -0.444 | 0.735 | 3.720 | -1.505 |
| IRX5                      | -0.079 | 0.947 | 3.071 | -0.287 |
| ISCA1                     | 0.141  | 1.103 | 3.933 | 0.772  |
| ISCU                      | 0.268  | 1.204 | 5.419 | 1.236  |
| ISG20                     | -0.059 | 0.960 | 2.511 | -0.157 |
| ISLR                      | 0.583  | 1.498 | 3.229 | 2.401  |
| ISLR2                     | 1.071  | 2.101 | 2.371 | 3.104  |
| ISM1//C20orf82            | 0.020  | 1.014 | 3.652 | 0.057  |
| ISOC1                     | -0.636 | 0.643 | 7.034 | -2.755 |
| ISPD                      | 0.124  | 1.089 | 3.968 | 0.550  |
| ITFG1                     | 0.454  | 1.370 | 7.564 | 1.958  |
| ITFG2//LOC100507424       | -0.581 | 0.668 | 3.067 | -2.254 |
| ITFG3                     | -0.717 | 0.609 | 4.738 | -1.852 |
| ITGA10                    | 0.068  | 1.049 | 2.076 | 0.251  |
| ITGA2                     | -1.383 | 0.383 | 5.372 | -2.768 |
| ITGA3                     | 0.456  | 1.372 | 5.205 | 1.646  |
| ITGA4                     | 0.266  | 1.203 | 2.782 | 0.889  |
| ITGA5                     | -0.034 | 0.977 | 4.048 | -0.136 |
| ITGA7                     | -0.164 | 0.892 | 5.114 | -0.804 |
| ITGA8                     | 0.829  | 1.777 | 3.926 | 2.380  |
| ITGA9                     | 0.444  | 1.360 | 4.953 | 1.373  |
| ITGAL                     | -0.633 | 0.645 | 3.688 | -1.541 |
| ITGAM                     | -0.432 | 0.741 | 4.800 | -1.335 |
| ITGAV                     | -0.442 | 0.736 | 8.925 | -2.311 |
| ITGAX                     | -0.414 | 0.751 | 5.152 | -0.901 |
| ITGB1                     | -0.206 | 0.867 | 4.326 | -0.899 |
| ITGB2                     | -0.343 | 0.789 | 3.499 | -1.053 |
| ITGB2-AS1                 | -0.361 | 0.778 | 2.286 | -1.405 |
| ITGB3//RP11-290H9.2       | 0.064  | 1.045 | 3.493 | 0.179  |
| ITGB3BP                   | 0.171  | 1.126 | 3.845 | 0.596  |
| ITGB4                     | -0.307 | 0.808 | 7.000 | -0.910 |
| ITGB5                     | -0.448 | 0.733 | 5.476 | -1.797 |
| ITGB8                     | -0.693 | 0.619 | 8.023 | -2.468 |
| ITGBL1                    | -0.324 | 0.799 | 5.073 | -0.794 |
| ITIH2                     | 0.916  | 1.887 | 3.819 | 2.071  |
| ITM2A                     | 0.327  | 1.254 | 6.409 | 1.226  |
| ITPKA                     | 1.517  | 2.862 | 3.092 | 2.895  |
| ITPKB                     | -0.615 | 0.653 | 8.172 | -2.217 |
| ITPKB-IT1                 | -0.520 | 0.697 | 3.889 | -1.406 |
| ITPKC                     | 0.602  | 1.518 | 5.435 | 2.000  |
| ITPR1                     | 1.631  | 3.098 | 6.218 | 3.023  |
| ITPR1-AS1                 | 0.840  | 1.790 | 2.171 | 2.122  |
| ITPR2                     | 0.233  | 1.176 | 7.405 | 1.150  |
| ITPR3                     | 0.177  | 1.131 | 3.995 | 0.633  |

|                        |        |       |       |        |
|------------------------|--------|-------|-------|--------|
| ITPRIP                 | -0.349 | 0.785 | 2.549 | -1.354 |
| ITPRIPL1               | 0.038  | 1.027 | 2.622 | 0.122  |
| ITPRIPL2               | 0.019  | 1.013 | 4.452 | 0.081  |
| ITSN1                  | 0.295  | 1.227 | 7.715 | 1.280  |
| JADE3//PHF16           | -0.906 | 0.534 | 4.266 | -2.798 |
| JAG2                   | 0.010  | 1.007 | 3.765 | 0.037  |
| JAK3                   | 0.156  | 1.114 | 3.864 | 0.418  |
| JAKMIP1                | 0.993  | 1.991 | 5.237 | 2.489  |
| JAM3                   | -0.848 | 0.556 | 7.032 | -3.013 |
| JAZF1                  | 0.429  | 1.346 | 3.775 | 1.830  |
| JAZF1-AS1              | 0.583  | 1.498 | 2.283 | 1.920  |
| JPH1                   | 0.804  | 1.746 | 4.744 | 2.246  |
| JPH2                   | -0.069 | 0.954 | 2.413 | -0.265 |
| JPH3                   | 1.256  | 2.389 | 5.704 | 2.284  |
| JPH4                   | 0.942  | 1.921 | 4.305 | 2.234  |
| JPX                    | -0.280 | 0.824 | 5.444 | -0.997 |
| JUNB                   | 0.048  | 1.034 | 7.887 | 0.162  |
| JUP                    | -0.686 | 0.622 | 4.885 | -2.372 |
| KAL1                   | -0.181 | 0.882 | 7.716 | -0.748 |
| KALRN                  | 1.232  | 2.349 | 5.381 | 3.146  |
| KANK1//RP11-31F19.1    | -0.639 | 0.642 | 5.198 | -2.270 |
| KANK2                  | 0.376  | 1.297 | 5.586 | 1.575  |
| KANK3                  | 0.019  | 1.013 | 3.399 | 0.072  |
| KANK4                  | -0.962 | 0.513 | 3.384 | -2.067 |
| KATNB1                 | 0.653  | 1.573 | 5.460 | 2.863  |
| KB-1107E3.1            | 0.526  | 1.440 | 1.838 | 1.477  |
| KB-1507C5.3            | -0.189 | 0.877 | 4.163 | -0.590 |
| KBTBD12                | 0.771  | 1.706 | 1.965 | 2.626  |
| KBTBD3                 | -0.016 | 0.989 | 4.723 | -0.080 |
| KBTBD6                 | 0.132  | 1.096 | 5.594 | 0.571  |
| KBTBD7                 | 0.340  | 1.266 | 4.398 | 1.261  |
| KBTBD8                 | 0.530  | 1.444 | 3.057 | 1.826  |
| KCNA1                  | 1.166  | 2.244 | 4.718 | 2.024  |
| KCNA2                  | 0.854  | 1.807 | 6.412 | 1.895  |
| KCNA3                  | 0.378  | 1.299 | 4.812 | 1.012  |
| KCNA4                  | 1.018  | 2.025 | 4.238 | 1.839  |
| KCNA5                  | 0.352  | 1.276 | 3.524 | 0.930  |
| KCNA6//GALNT8          | 0.368  | 1.290 | 5.870 | 1.274  |
| KCNAB1                 | 0.919  | 1.890 | 4.524 | 3.143  |
| KCNAB2                 | 0.942  | 1.921 | 3.478 | 2.495  |
| KCNAB3//RP11-1099M24.7 | 0.825  | 1.771 | 4.232 | 2.341  |
| KCNB1                  | 1.376  | 2.595 | 5.482 | 2.792  |
| KCNB2                  | 0.826  | 1.772 | 3.849 | 1.522  |
| KCNC1                  | 1.128  | 2.186 | 4.040 | 2.175  |
| KCNC2                  | 1.843  | 3.589 | 5.182 | 2.435  |
| KCNC4                  | 0.312  | 1.242 | 4.319 | 0.879  |
| KCND1                  | -0.288 | 0.819 | 3.827 | -0.869 |
| KCND2                  | 0.245  | 1.185 | 6.977 | 0.725  |
| KCND3                  | 0.818  | 1.764 | 6.611 | 2.400  |
| KCND3-IT1              | 0.216  | 1.162 | 2.626 | 0.671  |



|                              |        |       |       |        |
|------------------------------|--------|-------|-------|--------|
| KCNE1                        | -0.248 | 0.842 | 2.615 | -1.007 |
| KCNE4                        | -0.181 | 0.882 | 4.446 | -0.426 |
| KCNF1                        | 0.924  | 1.897 | 4.324 | 2.230  |
| KCNG1                        | 0.040  | 1.028 | 2.652 | 0.126  |
| KCNG3                        | 1.267  | 2.406 | 3.179 | 2.689  |
| KCNH1                        | 1.092  | 2.132 | 6.521 | 2.144  |
| KCNH1-IT1                    | 0.747  | 1.679 | 3.536 | 2.315  |
| KCNH2                        | 0.227  | 1.171 | 3.501 | 0.753  |
| KCNH3                        | 1.915  | 3.771 | 4.003 | 3.078  |
| KCNH4                        | 1.085  | 2.121 | 2.456 | 3.235  |
| KCNH5                        | 1.356  | 2.559 | 4.370 | 2.644  |
| KCNH7                        | 1.319  | 2.495 | 4.738 | 2.363  |
| KCNH8                        | -0.716 | 0.609 | 5.883 | -1.553 |
| KCNIP1                       | 0.307  | 1.238 | 4.866 | 1.060  |
| KCNIP2                       | 0.903  | 1.870 | 4.378 | 2.187  |
| KCNIP3                       | 0.480  | 1.395 | 5.630 | 1.360  |
| KCNIP4                       | 1.139  | 2.203 | 4.316 | 2.151  |
| KCNIP4-IT1                   | 1.417  | 2.670 | 4.637 | 2.480  |
| KCNJ10                       | -0.858 | 0.552 | 8.237 | -2.672 |
| KCNJ11                       | 0.193  | 1.143 | 3.512 | 0.759  |
| KCNJ12//KCNJ18//LOC100996843 | 0.117  | 1.084 | 2.287 | 0.493  |
| KCNJ16                       | -0.321 | 0.801 | 5.184 | -0.622 |
| KCNJ2                        | -0.959 | 0.514 | 6.282 | -3.273 |
| KCNJ2-AS1                    | -0.832 | 0.562 | 4.394 | -2.243 |
| KCNJ3                        | 1.124  | 2.179 | 5.933 | 2.483  |
| KCNJ4                        | 1.602  | 3.036 | 4.334 | 2.798  |
| KCNJ5                        | 0.197  | 1.146 | 3.064 | 0.725  |
| KCNJ6                        | 1.460  | 2.751 | 4.689 | 2.097  |
| KCNJ8                        | 0.522  | 1.436 | 3.138 | 1.858  |
| KCNJ9                        | 0.701  | 1.625 | 6.229 | 2.370  |
| KCNK1                        | 0.259  | 1.196 | 3.293 | 0.983  |
| KCNK10                       | 0.039  | 1.028 | 2.987 | 0.134  |
| KCNK13                       | -0.305 | 0.810 | 2.287 | -1.184 |
| KCNK15                       | 0.657  | 1.576 | 2.872 | 2.699  |
| KCNK2                        | 0.653  | 1.573 | 4.341 | 2.249  |
| KCNK3                        | 0.153  | 1.112 | 4.952 | 0.376  |
| KCNK4//RP11-783K16.10        | 0.290  | 1.223 | 3.072 | 1.140  |
| KCNK6                        | -0.505 | 0.705 | 3.474 | -2.058 |
| KCNK9                        | 0.569  | 1.483 | 3.525 | 1.583  |
| KCNMA1                       | 1.023  | 2.032 | 6.237 | 2.797  |
| KCNMB1                       | -0.319 | 0.802 | 3.742 | -1.209 |
| KCNMB2                       | 0.220  | 1.165 | 3.573 | 0.928  |
| KCNMB4                       | -0.120 | 0.920 | 6.624 | -0.335 |
| KCNN1                        | 1.228  | 2.342 | 4.862 | 2.718  |
| KCNN3                        | -0.606 | 0.657 | 6.730 | -1.848 |
| KCNN4                        | 0.374  | 1.296 | 3.391 | 1.450  |
| KCNQ1                        | 0.099  | 1.071 | 3.275 | 0.386  |
| KCNQ1DN                      | -0.140 | 0.907 | 2.979 | -0.433 |
| KCNQ1OT1//LOC101927338       | -0.826 | 0.564 | 3.777 | -1.897 |
| KCNQ2                        | 1.002  | 2.003 | 4.625 | 2.320  |

|                        |        |       |       |        |
|------------------------|--------|-------|-------|--------|
| KCNQ2                  | 1.344  | 2.538 | 3.943 | 2.235  |
| KCNQ3                  | 1.178  | 2.263 | 6.285 | 2.868  |
| KCNQ5                  | 1.886  | 3.695 | 3.908 | 3.207  |
| KCNQ5-IT1              | 1.083  | 2.119 | 2.794 | 2.371  |
| KCNS1                  | 1.705  | 3.261 | 3.739 | 2.882  |
| KCNS2                  | 1.484  | 2.797 | 4.103 | 2.665  |
| KCNT1                  | 1.299  | 2.461 | 4.789 | 2.468  |
| KCNT2                  | 1.034  | 2.048 | 4.646 | 2.767  |
| KCNV1                  | 2.217  | 4.649 | 3.474 | 3.038  |
| KCTD1                  | 0.799  | 1.740 | 5.195 | 2.463  |
| KCTD11                 | -0.488 | 0.713 | 4.391 | -2.147 |
| KCTD12                 | -0.402 | 0.757 | 7.126 | -1.777 |
| KCTD16                 | 1.479  | 2.787 | 4.819 | 2.615  |
| KCTD3                  | -0.237 | 0.848 | 7.502 | -1.044 |
| KCTD6                  | 0.044  | 1.031 | 3.919 | 0.168  |
| KDELC1                 | -0.107 | 0.929 | 4.072 | -0.373 |
| KDM5D                  | -0.386 | 0.766 | 4.341 | -0.348 |
| KDM6A                  | -0.500 | 0.707 | 5.574 | -1.789 |
| KDR                    | 0.352  | 1.277 | 5.029 | 0.851  |
| KEL                    | -1.130 | 0.457 | 4.479 | -2.980 |
| KGFLP1                 | 1.196  | 2.291 | 4.460 | 1.823  |
| KGFLP2                 | 0.555  | 1.469 | 4.751 | 1.516  |
| KHDRBS2                | 1.063  | 2.090 | 5.053 | 2.604  |
| KHDRBS3                | 0.716  | 1.643 | 5.771 | 2.193  |
| KHNYN                  | -0.472 | 0.721 | 4.734 | -2.060 |
| KIAA0040               | 0.358  | 1.282 | 4.499 | 1.035  |
| KIAA0226L              | -0.600 | 0.660 | 4.201 | -2.751 |
| KIAA0247               | -0.086 | 0.942 | 5.082 | -0.378 |
| KIAA0319               | 1.102  | 2.147 | 4.835 | 2.454  |
| KIAA0355               | -0.513 | 0.701 | 6.692 | -2.065 |
| KIAA0430               | 0.102  | 1.073 | 7.672 | 0.539  |
| KIAA0513               | 0.884  | 1.845 | 7.451 | 2.221  |
| KIAA0753               | 0.236  | 1.178 | 5.899 | 0.952  |
| KIAA0754//RP4-562N20.1 | -0.764 | 0.589 | 4.569 | -2.861 |
| KIAA0825               | 0.545  | 1.459 | 5.092 | 1.776  |
| KIAA0895               | 0.398  | 1.318 | 3.777 | 1.562  |
| KIAA0922               | -0.276 | 0.826 | 3.906 | -1.033 |
| KIAA1024               | -0.231 | 0.852 | 4.188 | -0.721 |
| KIAA1045               | 1.293  | 2.450 | 6.027 | 2.302  |
| KIAA1107               | 0.716  | 1.642 | 7.794 | 2.716  |
| KIAA1161               | -0.204 | 0.868 | 5.850 | -0.687 |
| KIAA1211L              | 1.763  | 3.395 | 3.892 | 2.830  |
| KIAA1217               | 0.594  | 1.509 | 4.834 | 1.673  |
| KIAA1279               | 0.128  | 1.093 | 7.841 | 0.597  |
| KIAA1324               | 0.754  | 1.687 | 5.023 | 1.988  |
| KIAA1324L              | -0.817 | 0.568 | 6.991 | -2.807 |
| KIAA1377               | 0.500  | 1.414 | 6.604 | 1.590  |
| KIAA1407               | -0.037 | 0.975 | 4.589 | -0.144 |
| KIAA1456//LOC101927137 | 0.550  | 1.464 | 4.119 | 2.206  |
| KIAA1462               | 0.534  | 1.448 | 5.189 | 1.866  |

|                            |        |       |       |        |
|----------------------------|--------|-------|-------|--------|
| KIAA1467                   | 0.755  | 1.687 | 6.129 | 2.288  |
| KIAA1468                   | 0.096  | 1.069 | 6.618 | 0.532  |
| KIAA1522                   | 0.422  | 1.340 | 2.645 | 1.532  |
| KIAA1524                   | 0.702  | 1.627 | 3.032 | 2.319  |
| KIAA1549                   | 0.401  | 1.320 | 5.677 | 1.191  |
| KIAA1549L                  | 1.527  | 2.881 | 6.210 | 2.506  |
| KIAA1586                   | 0.436  | 1.353 | 6.262 | 1.811  |
| KIAA1598                   | -0.593 | 0.663 | 8.123 | -2.138 |
| KIAA1614-AS1//RP11-46A10.4 | -0.348 | 0.786 | 3.132 | -1.282 |
| KIAA1644                   | 0.948  | 1.929 | 4.102 | 2.111  |
| KIAA1671                   | 0.459  | 1.375 | 4.566 | 1.903  |
| KIAA1751//C1orf222         | 0.555  | 1.469 | 2.017 | 2.205  |
| KIAA1755                   | -1.016 | 0.494 | 4.499 | -2.639 |
| KIAA1804//RP5-862P8.2      | 0.740  | 1.671 | 3.709 | 2.911  |
| KIAA1958                   | -0.962 | 0.513 | 5.910 | -3.666 |
| KIAA2022                   | 1.095  | 2.136 | 5.108 | 2.250  |
| KIF13B                     | -1.044 | 0.485 | 7.174 | -3.107 |
| KIF17                      | 0.520  | 1.434 | 2.982 | 1.675  |
| KIF19                      | -0.497 | 0.709 | 3.978 | -1.425 |
| KIF1C                      | -0.775 | 0.584 | 7.907 | -2.529 |
| KIF21A                     | 0.284  | 1.218 | 7.703 | 1.160  |
| KIF21B                     | 0.320  | 1.248 | 5.306 | 1.057  |
| KIF3A                      | 0.491  | 1.405 | 8.005 | 1.882  |
| KIF3B                      | 0.427  | 1.344 | 7.225 | 1.811  |
| KIF3C                      | 0.734  | 1.664 | 6.963 | 2.056  |
| KIF4A                      | -0.166 | 0.892 | 3.182 | -0.578 |
| KIF4B                      | 0.740  | 1.670 | 3.009 | 2.911  |
| KIF5A                      | 1.085  | 2.122 | 9.486 | 2.556  |
| KIF5B                      | -0.391 | 0.763 | 9.156 | -1.896 |
| KIF5C                      | 0.207  | 1.154 | 8.877 | 1.117  |
| KIF6                       | -0.446 | 0.734 | 4.076 | -1.354 |
| KIFAP3                     | 0.523  | 1.437 | 8.457 | 2.124  |
| KIFC2                      | 0.657  | 1.576 | 3.758 | 1.923  |
| KIR2DL1                    | 0.002  | 1.002 | 2.132 | 0.009  |
| KIRREL3                    | -0.192 | 0.875 | 5.388 | -0.695 |
| KIT                        | 0.409  | 1.328 | 6.274 | 1.371  |
| KITLG                      | 1.135  | 2.196 | 5.558 | 2.778  |
| KL                         | 0.055  | 1.039 | 2.443 | 0.202  |
| KLC1//XRCC3                | -0.499 | 0.707 | 3.115 | -1.719 |
| KLC2                       | 0.465  | 1.380 | 5.818 | 1.592  |
| KLF10                      | 0.274  | 1.209 | 5.343 | 1.136  |
| KLF12                      | 0.507  | 1.421 | 6.672 | 2.322  |
| KLF15                      | -0.759 | 0.591 | 4.588 | -2.403 |
| KLF2                       | -0.046 | 0.969 | 5.442 | -0.109 |
| KLF3                       | -0.550 | 0.683 | 5.820 | -2.413 |
| KLF4                       | -0.091 | 0.939 | 3.068 | -0.285 |
| KLF6                       | -0.112 | 0.925 | 6.911 | -0.546 |
| KLF7-IT1                   | -0.500 | 0.707 | 5.382 | -1.435 |
| KLF8                       | 0.820  | 1.765 | 3.229 | 2.764  |
| KLF9                       | 0.212  | 1.159 | 6.939 | 0.776  |

|                           |        |       |       |        |
|---------------------------|--------|-------|-------|--------|
| KLHDC3                    | 0.660  | 1.580 | 7.564 | 2.572  |
| KLHDC8A//LOC102724743     | 0.044  | 1.031 | 3.479 | 0.142  |
| KLHDC9                    | 0.736  | 1.666 | 4.667 | 2.520  |
| KLHL1                     | 0.086  | 1.062 | 3.721 | 0.164  |
| KLHL11                    | 0.359  | 1.283 | 5.983 | 1.692  |
| KLHL14                    | -0.246 | 0.843 | 2.702 | -0.958 |
| KLHL15                    | 0.317  | 1.246 | 5.030 | 1.411  |
| KLHL18                    | 0.310  | 1.240 | 5.224 | 1.345  |
| KLHL2                     | 0.070  | 1.050 | 7.226 | 0.330  |
| KLHL29                    | 0.950  | 1.932 | 4.269 | 2.662  |
| KLHL4                     | -0.605 | 0.658 | 5.996 | -1.972 |
| KLHL42                    | -0.023 | 0.984 | 4.775 | -0.125 |
| KLHL42//RP11-860B13.3     | 0.846  | 1.798 | 3.486 | 2.411  |
| KLHL6                     | -0.163 | 0.893 | 4.006 | -0.411 |
| KLHL7-AS1                 | 0.541  | 1.455 | 2.975 | 2.116  |
| KLK5                      | 0.063  | 1.045 | 3.413 | 0.220  |
| KLK6                      | -1.539 | 0.344 | 8.883 | -2.707 |
| KLK7                      | 1.506  | 2.841 | 4.615 | 3.245  |
| KLKB1                     | -0.535 | 0.690 | 2.877 | -1.963 |
| KLRC3//RP11-277P12.6      | -0.137 | 0.910 | 2.696 | -0.369 |
| KNDC1                     | 0.462  | 1.378 | 4.961 | 1.374  |
| KNG1                      | 0.558  | 1.472 | 1.771 | 1.468  |
| KNSTRN                    | 0.121  | 1.087 | 4.091 | 0.532  |
| KPNA2                     | 0.533  | 1.447 | 6.769 | 2.402  |
| KPNA5                     | 0.371  | 1.293 | 6.065 | 1.778  |
| KRAS                      | 0.587  | 1.502 | 5.064 | 2.740  |
| KRR1                      | 0.272  | 1.207 | 5.924 | 1.415  |
| KRT14                     | -0.037 | 0.975 | 2.389 | -0.119 |
| KRT16P2                   | 0.460  | 1.376 | 3.980 | 1.682  |
| KRT16P3//KRT16P1//KRT16P2 | 0.260  | 1.197 | 2.354 | 0.769  |
| KRT18P54                  | 0.107  | 1.077 | 3.446 | 0.308  |
| KRT222//RP5-1028K7.3      | 1.235  | 2.354 | 4.896 | 2.255  |
| KRT81                     | 0.341  | 1.267 | 2.072 | 1.089  |
| KRT81//RP11-845M18.6      | -0.314 | 0.805 | 3.703 | -1.306 |
| KRTAP10-9                 | -0.222 | 0.857 | 3.275 | -0.744 |
| KRTAP5-2                  | 0.869  | 1.826 | 3.243 | 2.935  |
| KRTAP6-2                  | 0.181  | 1.134 | 2.640 | 0.700  |
| KRTCAP2//RP11-201K10.3    | -0.593 | 0.663 | 3.861 | -3.148 |
| KSR2                      | 0.551  | 1.466 | 5.881 | 1.552  |
| KYNU                      | -0.115 | 0.924 | 2.767 | -0.352 |
| L1CAM                     | 1.170  | 2.250 | 5.580 | 2.018  |
| L2HGDH                    | 0.336  | 1.262 | 3.303 | 1.399  |
| L3MBTL4//CIAO1            | -0.185 | 0.880 | 4.876 | -0.871 |
| LA16c-23H5.4              | -0.526 | 0.695 | 2.220 | -1.838 |
| LA16c-431H6.6             | -0.851 | 0.554 | 2.792 | -2.145 |
| LACC1                     | -0.678 | 0.625 | 5.722 | -1.752 |
| LAIR1                     | -0.437 | 0.739 | 4.158 | -1.135 |
| LAMA1                     | -0.227 | 0.855 | 4.264 | -0.915 |
| LAMB1                     | 1.012  | 2.016 | 4.415 | 2.354  |
| LAMB2                     | -0.177 | 0.885 | 5.429 | -0.883 |

|                        |        |       |       |        |
|------------------------|--------|-------|-------|--------|
| LAMB2P1//RP11-694I15.7 | 0.331  | 1.258 | 2.793 | 1.034  |
| LAMC1                  | 0.368  | 1.290 | 5.538 | 1.617  |
| LAMC3                  | 0.130  | 1.094 | 2.880 | 0.524  |
| LAMP1                  | -0.569 | 0.674 | 7.884 | -2.506 |
| LAMP2                  | -0.471 | 0.722 | 8.590 | -1.851 |
| LAMP5                  | 0.423  | 1.341 | 7.097 | 0.585  |
| LAMTOR3                | 0.462  | 1.378 | 5.836 | 2.030  |
| LANCL2                 | 0.051  | 1.036 | 6.409 | 0.241  |
| LANCL3                 | 0.374  | 1.296 | 2.988 | 1.500  |
| LAP3                   | -0.051 | 0.965 | 6.008 | -0.202 |
| LAPTM5                 | -0.324 | 0.799 | 9.023 | -0.667 |
| LARGE                  | 0.566  | 1.480 | 5.351 | 2.110  |
| LARP6                  | -0.524 | 0.696 | 4.498 | -1.985 |
| LAT2                   | -0.350 | 0.784 | 5.038 | -1.499 |
| LATS2                  | -0.393 | 0.761 | 4.901 | -1.828 |
| LAYN                   | -0.582 | 0.668 | 3.690 | -2.093 |
| LCA10//U52112.12       | 0.021  | 1.015 | 2.341 | 0.078  |
| LCAT                   | -0.546 | 0.685 | 5.464 | -2.403 |
| LCE3A                  | 0.077  | 1.055 | 2.490 | 0.279  |
| LCE3B                  | 0.051  | 1.036 | 3.219 | 0.133  |
| LCLAT1                 | 0.371  | 1.294 | 4.764 | 1.808  |
| LCN12                  | 0.234  | 1.176 | 3.791 | 0.952  |
| LCP1                   | -0.565 | 0.676 | 6.305 | -1.590 |
| LCP2                   | 0.234  | 1.176 | 6.426 | 1.010  |
| LCTL                   | -0.648 | 0.638 | 3.040 | -1.849 |
| LDB2                   | 1.434  | 2.702 | 4.738 | 3.268  |
| LDB3                   | -1.035 | 0.488 | 4.483 | -2.073 |
| LDHA                   | 0.286  | 1.219 | 5.112 | 1.046  |
| LDLR                   | 0.138  | 1.100 | 6.014 | 0.429  |
| LDLRAD2                | 0.155  | 1.113 | 2.135 | 0.640  |
| LDLRAD3                | -0.399 | 0.759 | 5.838 | -1.518 |
| LDLRAD4-AS1            | -0.326 | 0.798 | 2.255 | -1.188 |
| LDLRAP1                | -1.203 | 0.434 | 4.629 | -3.037 |
| LDOC1                  | -0.037 | 0.975 | 6.605 | -0.176 |
| LENG8                  | -0.632 | 0.645 | 6.995 | -2.412 |
| LEPREL1                | -0.619 | 0.651 | 4.004 | -2.100 |
| LETM2                  | 0.088  | 1.063 | 4.456 | 0.362  |
| LFNG                   | -0.376 | 0.770 | 3.440 | -1.552 |
| LGALS1                 | -0.420 | 0.748 | 6.000 | -1.793 |
| LGALS3                 | 0.878  | 1.838 | 3.244 | 3.094  |
| LGALS3BP               | -0.924 | 0.527 | 6.671 | -2.409 |
| LGALS9B                | -0.226 | 0.855 | 4.604 | -0.720 |
| LGALS9C//LGALS9B       | 0.129  | 1.093 | 3.078 | 0.422  |
| LGALSL                 | 0.618  | 1.535 | 6.576 | 2.153  |
| LGI1                   | 0.423  | 1.340 | 7.448 | 1.273  |
| LGI2                   | 0.149  | 1.109 | 5.049 | 0.416  |
| LGMN                   | 0.296  | 1.228 | 6.319 | 1.102  |
| LGR4                   | -0.041 | 0.972 | 6.248 | -0.146 |
| LGR5                   | -1.677 | 0.313 | 6.212 | -3.066 |
| LGR6                   | -0.296 | 0.814 | 3.110 | -0.691 |

|                                    |        |       |       |        |
|------------------------------------|--------|-------|-------|--------|
| LHFPL1                             | 0.564  | 1.478 | 3.303 | 2.394  |
| LHFPL2                             | -0.324 | 0.799 | 3.918 | -1.297 |
| LHFPL4                             | 0.790  | 1.729 | 4.243 | 2.274  |
| LHFPL5//RP3-422H11.8               | 0.479  | 1.394 | 3.282 | 1.523  |
| LHPP                               | -0.456 | 0.729 | 6.146 | -2.063 |
| LHX2                               | 1.720  | 3.294 | 4.208 | 2.552  |
| LHX3                               | -0.335 | 0.793 | 2.650 | -1.130 |
| LHX4-AS1//RP5-1180C10.2            | -0.669 | 0.629 | 3.101 | -2.553 |
| LHX6                               | 0.531  | 1.445 | 3.026 | 1.591  |
| LIAS                               | 0.048  | 1.034 | 4.899 | 0.225  |
| LIFR                               | -0.513 | 0.701 | 7.413 | -1.869 |
| LILRA1                             | -0.414 | 0.750 | 2.849 | -1.166 |
| LILRA2                             | -0.501 | 0.706 | 2.828 | -1.599 |
| LILRA4                             | -0.627 | 0.648 | 3.369 | -1.357 |
| LILRA6                             | -0.312 | 0.806 | 2.414 | -0.781 |
| LILRB3                             | -0.446 | 0.734 | 2.949 | -1.318 |
| LILRB4                             | -0.409 | 0.753 | 3.636 | -1.431 |
| LIMA1                              | -0.393 | 0.762 | 4.773 | -1.663 |
| LIME1//ZGPAT//RP4-583P15.15        | -0.705 | 0.613 | 2.631 | -2.086 |
| LIMK1                              | 0.616  | 1.532 | 5.690 | 1.624  |
| LIMK2                              | 0.079  | 1.056 | 5.862 | 0.266  |
| LIMS2                              | -0.225 | 0.856 | 2.793 | -0.886 |
| LIMS3-LOC440895//LIMS3//LIMS3L//AC | -0.010 | 0.993 | 4.376 | -0.038 |
| LIN7A                              | 0.887  | 1.849 | 3.878 | 2.589  |
| LINC00032                          | -0.722 | 0.606 | 3.436 | -2.155 |
| LINC00086                          | 0.853  | 1.807 | 4.576 | 2.355  |
| LINC00087                          | 0.875  | 1.834 | 5.440 | 1.712  |
| LINC00094                          | 0.401  | 1.321 | 5.369 | 1.716  |
| LINC00173                          | -0.398 | 0.759 | 3.792 | -1.394 |
| LINC00173                          | -0.233 | 0.851 | 3.065 | -0.623 |
| LINC00202-1                        | 0.579  | 1.494 | 3.863 | 2.068  |
| LINC00271                          | 0.165  | 1.121 | 4.118 | 0.652  |
| LINC00278                          | -0.022 | 0.985 | 3.044 | -0.047 |
| LINC00280                          | 0.163  | 1.120 | 2.244 | 0.517  |
| LINC00282                          | -0.283 | 0.822 | 3.693 | -1.290 |
| LINC00294                          | 0.321  | 1.250 | 6.360 | 1.396  |
| LINC00298//AC007464.1              | 0.110  | 1.080 | 2.510 | 0.392  |
| LINC00310                          | -0.311 | 0.806 | 2.737 | -1.202 |
| LINC00315                          | -0.405 | 0.755 | 2.503 | -1.481 |
| LINC00320                          | -0.575 | 0.671 | 4.420 | -1.666 |
| LINC00323                          | -0.861 | 0.550 | 2.065 | -1.676 |
| LINC00326                          | 1.013  | 2.018 | 1.603 | 3.413  |
| LINC00328                          | 0.236  | 1.178 | 2.840 | 0.364  |
| LINC00339                          | -0.269 | 0.830 | 2.441 | -1.010 |
| LINC00341//SYNE3                   | -0.625 | 0.648 | 3.834 | -1.810 |
| LINC00342                          | -0.279 | 0.824 | 3.209 | -0.786 |
| LINC00390//RP11-478K15.1           | 0.105  | 1.075 | 2.182 | 0.243  |
| LINC00391                          | -0.279 | 0.824 | 2.349 | -0.908 |
| LINC00403                          | 1.037  | 2.052 | 4.416 | 2.389  |
| LINC00440                          | 0.891  | 1.855 | 1.594 | 3.255  |

|                                   |        |       |       |        |
|-----------------------------------|--------|-------|-------|--------|
| LINC00441                         | 0.015  | 1.011 | 2.236 | 0.052  |
| LINC00443                         | 0.475  | 1.390 | 1.857 | 1.338  |
| LINC00461//MIR9-2                 | 0.126  | 1.091 | 5.579 | 0.505  |
| LINC00467                         | -0.446 | 0.734 | 3.562 | -1.880 |
| LINC00471                         | -0.141 | 0.907 | 3.894 | -0.528 |
| LINC00472//RP3-331H24.5           | -0.141 | 0.907 | 3.854 | -0.504 |
| LINC00473                         | 0.694  | 1.618 | 2.407 | 2.615  |
| LINC00476                         | 0.060  | 1.042 | 3.463 | 0.139  |
| LINC00476//LOC101930476           | -0.108 | 0.928 | 3.048 | -0.383 |
| LINC00484                         | -0.246 | 0.843 | 2.479 | -0.920 |
| LINC00499                         | 0.050  | 1.035 | 2.993 | 0.075  |
| LINC00506                         | -0.001 | 0.999 | 2.819 | -0.004 |
| LINC00507                         | 1.661  | 3.163 | 2.589 | 2.245  |
| LINC00515//AP000223.42            | 0.242  | 1.183 | 3.148 | 0.919  |
| LINC00539//LINC00422              | -0.204 | 0.868 | 2.571 | -0.791 |
| LINC00566                         | 0.136  | 1.099 | 3.229 | 0.492  |
| LINC00577                         | 0.688  | 1.611 | 2.787 | 2.149  |
| LINC00594                         | 0.799  | 1.740 | 4.491 | 1.884  |
| LINC00599//MIR124-1               | 1.082  | 2.117 | 3.237 | 2.077  |
| LINC00599//MIR124-1               | 0.421  | 1.339 | 4.204 | 1.092  |
| LINC00601                         | -0.864 | 0.550 | 4.729 | -1.742 |
| LINC00609                         | -1.357 | 0.391 | 4.089 | -2.272 |
| LINC00614                         | 0.453  | 1.369 | 2.790 | 1.131  |
| LINC00621                         | 0.929  | 1.904 | 2.698 | 2.549  |
| LINC00622                         | 1.224  | 2.336 | 4.495 | 2.117  |
| LINC00630//LOC102725166//LLOXNC01 | 0.337  | 1.263 | 5.620 | 1.787  |
| LINC00632                         | 0.109  | 1.078 | 5.780 | 0.316  |
| LINC00633//LOC101928677           | -0.346 | 0.787 | 2.253 | -0.921 |
| LINC00639                         | -0.997 | 0.501 | 4.021 | -1.720 |
| LINC00641                         | 0.300  | 1.231 | 7.123 | 1.387  |
| LINC00643//RP11-355I22.6          | 0.287  | 1.220 | 2.478 | 1.082  |
| LINC00662//CTC-459F4.2            | -0.001 | 1.000 | 3.611 | -0.003 |
| LINC00665                         | 0.012  | 1.008 | 3.214 | 0.044  |
| LINC00672                         | 0.247  | 1.187 | 4.821 | 1.120  |
| LINC00675                         | 0.186  | 1.138 | 2.006 | 0.693  |
| LINC00685                         | -0.757 | 0.592 | 2.609 | -3.087 |
| LINC00693                         | -0.367 | 0.776 | 4.601 | -1.442 |
| LINC00836                         | -0.897 | 0.537 | 3.778 | -1.870 |
| LINC00839                         | 0.396  | 1.316 | 3.837 | 1.074  |
| LINC00842                         | -0.316 | 0.803 | 3.546 | -0.924 |
| LINC00862                         | -0.541 | 0.687 | 2.365 | -1.542 |
| LINC00877                         | -0.310 | 0.807 | 2.480 | -1.198 |
| LINC00882                         | 0.182  | 1.135 | 4.146 | 0.888  |
| LINC00883                         | -0.311 | 0.806 | 4.810 | -1.189 |
| LINC00884                         | 0.456  | 1.372 | 3.634 | 1.703  |
| LINC00886                         | -0.185 | 0.879 | 2.389 | -0.685 |
| LINC00888                         | -0.124 | 0.918 | 7.559 | -0.581 |
| LINC00888                         | 0.123  | 1.089 | 4.108 | 0.499  |
| LINC00889                         | 1.499  | 2.826 | 3.597 | 2.800  |
| LINC00893                         | 0.345  | 1.271 | 3.161 | 1.191  |

|                                    |        |       |       |        |
|------------------------------------|--------|-------|-------|--------|
| LINC00899                          | -0.623 | 0.649 | 3.012 | -1.808 |
| LINC00920                          | -1.227 | 0.427 | 2.696 | -3.174 |
| LINC00936                          | 1.000  | 2.000 | 3.725 | 2.787  |
| LINC00950                          | 0.502  | 1.416 | 4.773 | 1.998  |
| LINC00951                          | 0.119  | 1.086 | 2.303 | 0.414  |
| LINC00957                          | -0.213 | 0.863 | 5.094 | -1.100 |
| LINC00961                          | 0.185  | 1.137 | 4.546 | 0.693  |
| LINC00963                          | -0.214 | 0.862 | 4.058 | -0.774 |
| LINC00969//SDHAP2                  | -0.416 | 0.749 | 5.271 | -1.269 |
| LINC00982                          | 0.803  | 1.745 | 3.719 | 3.216  |
| LINC00984                          | 0.305  | 1.235 | 5.626 | 0.797  |
| LINC00987                          | -0.477 | 0.718 | 4.799 | -1.232 |
| LINC00997                          | -0.193 | 0.875 | 4.568 | -0.654 |
| LINC01000                          | -0.688 | 0.621 | 4.884 | -2.332 |
| LINC01000//LINC01061//LOC101060341 | -0.549 | 0.683 | 7.091 | -1.986 |
| LINC01000//LINC01061//LOC101060341 | -0.503 | 0.706 | 6.888 | -1.967 |
| LINC01000//LINC01061//LOC101060341 | -0.502 | 0.706 | 6.906 | -1.923 |
| LINC01000//LINC01061//LOC729737//L | -0.563 | 0.677 | 7.111 | -2.273 |
| LINC01002                          | 0.080  | 1.057 | 4.986 | 0.244  |
| LINC01007//RP5-1059M17.1           | 1.205  | 2.306 | 2.848 | 1.970  |
| LINC01018//CTD-2195M18.1           | 0.594  | 1.509 | 2.809 | 2.104  |
| LINC01030//AB015752.4              | -0.422 | 0.746 | 2.541 | -1.488 |
| LINC01057//RP11-86H7.1             | 0.130  | 1.094 | 2.816 | 0.436  |
| LINC01061                          | -0.678 | 0.625 | 4.680 | -1.734 |
| LINC01061//LOC729218//LOC10192691  | -0.569 | 0.674 | 6.786 | -2.259 |
| LINC01063//AC023797.1              | 0.030  | 1.021 | 3.742 | 0.104  |
| LINC01088//RP11-438E5.1            | -1.872 | 0.273 | 4.189 | -3.726 |
| LINC01094//RP11-792D21.2           | -0.208 | 0.866 | 6.487 | -0.648 |
| LINC01102//AC013402.2              | -0.069 | 0.953 | 4.218 | -0.228 |
| LINC01105//LOC400940//AC073479.1   | -0.966 | 0.512 | 6.290 | -2.616 |
| LINC01106//LINC01123               | 1.082  | 2.118 | 4.706 | 2.104  |
| LINC01122//AC007092.1              | 0.615  | 1.532 | 3.298 | 1.946  |
| LINC01123//AC013268.5              | 1.271  | 2.414 | 5.304 | 2.285  |
| LINC01125//AC017099.3              | 0.123  | 1.089 | 3.186 | 0.441  |
| LINC01128//RP11-206L10.11          | 0.741  | 1.671 | 3.818 | 2.544  |
| LINC01137//RP11-422J8.1            | -0.883 | 0.542 | 2.964 | -2.702 |
| LINC01140//RP5-1052I5.1            | 0.255  | 1.193 | 2.712 | 0.869  |
| LINC01144                          | -0.449 | 0.733 | 3.309 | -1.618 |
| LINC01149//XXbac-BPG181B23.4       | -0.272 | 0.828 | 2.798 | -0.783 |
| LINC01158//AC018730.1              | -0.270 | 0.829 | 4.450 | -1.314 |
| LINC01166//RP13-137A17.4           | 0.076  | 1.054 | 3.780 | 0.225  |
| LINC01170//RP11-93O7.5             | -0.447 | 0.734 | 2.588 | -1.444 |
| LINC01197//CTD-2536I1.1            | 1.011  | 2.016 | 2.502 | 2.532  |
| LINC01212//RP11-460N16.1           | -0.595 | 0.662 | 2.677 | -1.959 |
| LINC01234//RP11-438N16.1           | 0.568  | 1.482 | 3.413 | 1.754  |
| LINC01250//AC019118.2              | 0.825  | 1.772 | 2.001 | 2.272  |
| LINC01252//RP11-434C1.1            | 0.573  | 1.488 | 4.040 | 1.650  |
| LINC01272//RP11-290F20.3           | -0.028 | 0.981 | 2.425 | -0.099 |
| LINC01277//RP11-439L18.3           | 0.611  | 1.528 | 2.097 | 2.422  |
| LINC01285//RP4-562J12.2            | -0.389 | 0.763 | 3.742 | -0.929 |



|                                    |        |       |       |        |
|------------------------------------|--------|-------|-------|--------|
| LINC01289//RP11-579E24.1           | 0.728  | 1.656 | 1.594 | 2.116  |
| LINC01315//Z83851.1                | -0.470 | 0.722 | 3.983 | -1.638 |
| LINC01338                          | -1.449 | 0.366 | 4.363 | -2.738 |
| LINC01351//RP11-547I7.2            | 0.303  | 1.234 | 2.939 | 1.098  |
| LINC01354//RP5-855F14.1            | 0.095  | 1.068 | 5.399 | 0.217  |
| LINC01355//RP5-1057J7.6            | -0.288 | 0.819 | 5.204 | -1.074 |
| LINC01359//RP11-182I10.3           | -0.006 | 0.996 | 2.546 | -0.017 |
| LINC01377//CTD-2029E14.1           | -1.026 | 0.491 | 2.729 | -1.251 |
| LINC01422//RP1-90L6.2              | -0.281 | 0.823 | 3.823 | -0.736 |
| LINC-PINT//MIR29A//MIR29B1//AC0587 | 0.062  | 1.044 | 5.821 | 0.213  |
| LINCR-0001//RP11-981G7.2           | 0.499  | 1.414 | 5.203 | 1.600  |
| LINCR-0002//RP11-197K6.1           | 0.822  | 1.768 | 1.785 | 2.207  |
| LINCR-0003//CTD-2023N9.3           | 1.771  | 3.414 | 2.430 | 2.745  |
| LINGO1                             | 0.473  | 1.388 | 3.826 | 1.565  |
| LINGO2                             | 1.008  | 2.011 | 4.702 | 1.918  |
| LINGO4                             | -0.869 | 0.547 | 2.789 | -1.636 |
| LIPA//LOC101926887                 | -0.646 | 0.639 | 7.073 | -2.037 |
| LIPE                               | -1.048 | 0.484 | 5.907 | -2.240 |
| LIPG                               | -0.488 | 0.713 | 3.052 | -1.008 |
| LITAF                              | -0.770 | 0.586 | 6.708 | -2.104 |
| LIX1                               | -0.307 | 0.808 | 7.348 | -0.880 |
| LLOXNC01-16G2.1                    | 0.605  | 1.521 | 2.181 | 2.245  |
| LLGL1                              | -0.627 | 0.647 | 6.823 | -1.849 |
| LLGL2                              | -0.384 | 0.766 | 3.371 | -1.380 |
| LMAN1L//CPLX3//RP11-414J4.2        | -0.276 | 0.826 | 2.471 | -0.812 |
| LMBR1                              | 0.292  | 1.224 | 6.953 | 1.445  |
| LMBRD2                             | 0.591  | 1.507 | 7.331 | 2.468  |
| LMCD1                              | -0.351 | 0.784 | 4.613 | -1.270 |
| LMLN                               | 0.051  | 1.036 | 5.249 | 0.246  |
| LMNA                               | -0.354 | 0.782 | 4.603 | -1.498 |
| LMNB1                              | 0.345  | 1.270 | 4.148 | 1.145  |
| LMO3                               | 0.823  | 1.769 | 4.901 | 2.401  |
| LMO4                               | 1.189  | 2.280 | 6.051 | 3.048  |
| LMO7//RP11-29G8.3                  | 1.109  | 2.157 | 4.315 | 3.274  |
| LMOD1                              | 0.658  | 1.578 | 3.595 | 1.881  |
| LMOD1//RP11-307B6.3                | -0.247 | 0.843 | 3.212 | -0.806 |
| LMTK2                              | 1.018  | 2.025 | 6.585 | 2.776  |
| LMTK3                              | 0.831  | 1.779 | 5.178 | 2.388  |
| LMX1B                              | 0.162  | 1.119 | 2.772 | 0.544  |
| LNP1                               | 0.644  | 1.562 | 5.237 | 2.080  |
| LNX1                               | 1.045  | 2.064 | 4.326 | 2.089  |
| LOC100126784//RP11-359E10.1        | 0.701  | 1.625 | 3.740 | 2.489  |
| LOC100127909                       | -0.027 | 0.982 | 2.147 | -0.112 |
| LOC100127910//RP1-79C4.4           | -0.303 | 0.811 | 3.580 | -1.037 |
| LOC100128253//RP5-1063M23.1        | 1.300  | 2.462 | 1.934 | 3.535  |
| LOC100128288                       | -0.453 | 0.730 | 3.901 | -1.742 |
| LOC100128340                       | 0.022  | 1.015 | 2.917 | 0.049  |
| LOC100128343                       | -0.076 | 0.949 | 2.302 | -0.294 |
| LOC100128364                       | -0.240 | 0.847 | 2.342 | -0.661 |
| LOC100128508                       | -0.449 | 0.732 | 4.562 | -1.394 |

|                                    |        |       |       |        |
|------------------------------------|--------|-------|-------|--------|
| LOC100128554//RP5-944M2.3          | 0.635  | 1.553 | 2.324 | 2.055  |
| LOC100128563                       | -0.160 | 0.895 | 3.616 | -0.605 |
| LOC100128751                       | -0.491 | 0.711 | 2.340 | -1.311 |
| LOC100129027//AL592528.1           | -0.096 | 0.936 | 3.315 | -0.451 |
| LOC100129129//AF131216.5           | -0.269 | 0.830 | 4.102 | -0.923 |
| LOC100129138//RP11-364B6.1         | -0.482 | 0.716 | 2.410 | -1.722 |
| LOC100129223                       | 0.120  | 1.087 | 2.166 | 0.547  |
| LOC100129233                       | 1.132  | 2.191 | 2.425 | 3.674  |
| LOC100129361                       | -0.076 | 0.949 | 5.229 | -0.309 |
| LOC100129434//AC007743.1           | -0.183 | 0.881 | 4.330 | -0.570 |
| LOC100129455                       | -0.381 | 0.768 | 2.195 | -1.986 |
| LOC100129473                       | -0.894 | 0.538 | 3.083 | -2.000 |
| LOC100129518//SOD2                 | -0.269 | 0.830 | 3.153 | -0.544 |
| LOC100129534//RP4-740C4.6          | 0.421  | 1.339 | 3.348 | 1.740  |
| LOC100129540//RP11-16K12.1//RASGRI | -0.711 | 0.611 | 3.356 | -2.334 |
| LOC100129550//RP11-67L2.2          | 0.297  | 1.228 | 4.706 | 1.210  |
| LOC100129697//RP11-830F9.6         | -0.011 | 0.993 | 2.666 | -0.041 |
| LOC100129831                       | -0.454 | 0.730 | 2.697 | -1.744 |
| LOC100129936//CTA-373H7.7          | 0.945  | 1.925 | 3.362 | 2.993  |
| LOC100129973//RP11-430B1.2         | 0.908  | 1.877 | 2.671 | 3.002  |
| LOC100130027                       | 0.400  | 1.320 | 3.253 | 1.451  |
| LOC100130093//SNAP47//JMJD4        | 0.719  | 1.646 | 3.103 | 2.742  |
| LOC100130169                       | 0.554  | 1.468 | 3.155 | 1.712  |
| LOC100130172//RP11-325L7.1         | 0.702  | 1.627 | 2.460 | 2.462  |
| LOC100130193                       | -0.301 | 0.811 | 2.652 | -1.240 |
| LOC100130285                       | 0.337  | 1.263 | 4.085 | 1.378  |
| LOC100130298//AC022182.3           | -0.136 | 0.910 | 2.098 | -0.591 |
| LOC100130357//RP1-257A7.4          | -0.074 | 0.950 | 2.258 | -0.241 |
| LOC100130370//RP11-1055B8.3        | -0.367 | 0.775 | 3.331 | -1.318 |
| LOC100130691//AC074286.1//NFE2L2   | -0.151 | 0.901 | 4.311 | -0.523 |
| LOC100130705//RP11-309L24.4        | 0.604  | 1.520 | 2.861 | 1.647  |
| LOC100130876                       | -0.508 | 0.703 | 2.601 | -1.588 |
| LOC100130950//RP11-333E1.1         | -0.016 | 0.989 | 3.665 | -0.055 |
| LOC100130987                       | 0.203  | 1.151 | 3.218 | 0.862  |
| LOC100130992                       | -0.338 | 0.791 | 3.474 | -1.040 |
| LOC100131262                       | -0.195 | 0.874 | 3.501 | -0.634 |
| LOC100131510                       | 0.111  | 1.080 | 2.624 | 0.346  |
| LOC100131541                       | -0.547 | 0.685 | 3.862 | -1.468 |
| LOC100131564//RP4-717I23.3         | -0.632 | 0.645 | 4.916 | -1.944 |
| LOC100131802                       | 0.277  | 1.212 | 2.328 | 0.932  |
| LOC100131826                       | 0.503  | 1.417 | 3.363 | 1.832  |
| LOC100132004//AC125634.1//ANKRD3C  | 0.260  | 1.197 | 2.816 | 0.818  |
| LOC100132062//LOC100133331//LINC0  | -0.467 | 0.724 | 7.928 | -1.973 |
| LOC100132111//AL450992.2           | 0.407  | 1.326 | 2.895 | 1.403  |
| LOC100132215//AC009501.4           | 0.162  | 1.119 | 2.187 | 0.597  |
| LOC100132352                       | 0.282  | 1.216 | 4.608 | 1.019  |
| LOC100132731//RP11-723O4.6//KIAA12 | 0.069  | 1.049 | 2.872 | 0.232  |
| LOC100132741//LINC00891            | -0.134 | 0.911 | 3.896 | -0.486 |
| LOC100132891//RP11-383H13.1        | 0.952  | 1.935 | 1.932 | 3.452  |
| LOC100133050                       | -0.426 | 0.744 | 2.414 | -1.440 |

|                                   |        |       |       |        |
|-----------------------------------|--------|-------|-------|--------|
| LOC100133106                      | -0.914 | 0.531 | 3.624 | -3.698 |
| LOC100133299                      | 0.089  | 1.063 | 3.698 | 0.296  |
| LOC100133331//LOC101929819//LINC0 | -0.391 | 0.763 | 5.744 | -1.587 |
| LOC100133445//RP3-395M20.8        | 0.142  | 1.103 | 2.300 | 0.561  |
| LOC100133669//RP11-273G15.2       | 0.775  | 1.711 | 3.590 | 2.301  |
| LOC100134868                      | -0.364 | 0.777 | 4.939 | -1.343 |
| LOC100190986//LOC102725125        | -0.363 | 0.777 | 8.167 | -1.258 |
| LOC100190986//LOC102725125        | -0.361 | 0.778 | 8.129 | -1.214 |
| LOC100233156                      | -0.406 | 0.755 | 4.757 | -0.796 |
| LOC100270746                      | -0.714 | 0.609 | 4.037 | -2.359 |
| LOC100272216                      | -0.448 | 0.733 | 5.405 | -1.466 |
| LOC100272216                      | -0.350 | 0.785 | 5.388 | -1.214 |
| LOC100272216                      | -0.412 | 0.752 | 5.201 | -1.191 |
| LOC100272216                      | -0.364 | 0.777 | 6.269 | -1.126 |
| LOC100272216                      | -0.350 | 0.785 | 4.758 | -0.969 |
| LOC100286906//AC008060.7          | -0.117 | 0.922 | 4.336 | -0.196 |
| LOC100286925//LL22NC03-86G7.1     | 0.519  | 1.433 | 2.590 | 2.020  |
| LOC100287225//RP11-267C16.1       | -0.488 | 0.713 | 3.950 | -1.433 |
| LOC100287497//LOC100287934//LOC10 | 0.304  | 1.234 | 4.954 | 1.100  |
| LOC100287704                      | -0.112 | 0.925 | 4.055 | -0.392 |
| LOC100287834                      | -0.499 | 0.708 | 9.111 | -1.275 |
| LOC100287846//LOC286063//RP11-113 | -0.030 | 0.979 | 4.302 | -0.111 |
| LOC100287934//LOC101930657//RP11- | -0.106 | 0.929 | 3.963 | -0.470 |
| LOC100288160                      | -0.135 | 0.911 | 3.305 | -0.517 |
| LOC100288181//CTD-2292P10.4       | 0.527  | 1.441 | 4.561 | 1.653  |
| LOC100288310//RP11-531A24.3       | 0.662  | 1.582 | 2.765 | 1.775  |
| LOC100288842//RP11-27I1.4         | -0.391 | 0.763 | 3.292 | -1.378 |
| LOC100288911//RP11-490M8.1        | 0.644  | 1.562 | 3.607 | 2.093  |
| LOC100289455                      | -0.545 | 0.685 | 3.880 | -1.784 |
| LOC100289473//RP4-673D20.3        | 0.022  | 1.016 | 4.212 | 0.090  |
| LOC100289495                      | 0.554  | 1.468 | 3.332 | 2.424  |
| LOC100294341//LOC101929774//RP11- | -0.517 | 0.699 | 3.587 | -1.984 |
| LOC100294362//CTD-2047H16.4       | 0.323  | 1.251 | 3.489 | 1.227  |
| LOC100379224//AC084219.4          | -0.179 | 0.883 | 4.751 | -0.827 |
| LOC100505501//RP11-25K19.1        | 0.570  | 1.485 | 2.610 | 2.763  |
| LOC100505502                      | -0.032 | 0.978 | 2.426 | -0.118 |
| LOC100505549//ATP8B1              | -0.738 | 0.600 | 2.626 | -2.772 |
| LOC100505564//RP11-876N24.4       | 0.185  | 1.137 | 2.244 | 0.828  |
| LOC100505570//AP006285.6          | -0.579 | 0.669 | 2.399 | -1.277 |
| LOC100505835//CTD-2081K17.2       | -0.513 | 0.701 | 4.179 | -0.824 |
| LOC100505912                      | -0.295 | 0.815 | 2.682 | -1.044 |
| LOC100505942                      | -0.165 | 0.892 | 4.020 | -0.558 |
| LOC100506022                      | -0.782 | 0.582 | 2.761 | -3.108 |
| LOC100506023                      | 0.039  | 1.028 | 3.881 | 0.150  |
| LOC100506036//RP11-353K11.1       | -0.624 | 0.649 | 2.283 | -2.151 |
| LOC100506083//RP11-529K1.2        | -0.328 | 0.797 | 2.614 | -1.067 |
| LOC100506114//CTD-2545M3.8        | -0.559 | 0.679 | 2.605 | -1.842 |
| LOC100506124//TTC21B              | 0.209  | 1.156 | 2.771 | 0.847  |
| LOC100506127//RP11-111M22.2       | 0.649  | 1.569 | 3.502 | 2.918  |
| LOC100506136//RP11-682N22.1       | -0.430 | 0.742 | 2.540 | -1.428 |

|                                   |        |       |       |        |
|-----------------------------------|--------|-------|-------|--------|
| LOC100506207//RP11-314C16.1       | -0.191 | 0.876 | 3.785 | -0.685 |
| LOC100506217//RP11-823P9.3        | 0.112  | 1.081 | 2.851 | 0.312  |
| LOC100506258//CTD-2516F10.2       | -0.445 | 0.735 | 3.670 | -1.454 |
| LOC100506276                      | -0.084 | 0.943 | 3.627 | -0.292 |
| LOC100506299//AC011747.7          | -0.249 | 0.842 | 3.622 | -0.934 |
| LOC100506384//RP4-719C8.1         | -0.954 | 0.516 | 4.036 | -2.447 |
| LOC100506411//RP6-65G23.3         | 0.941  | 1.920 | 3.034 | 2.108  |
| LOC100506458                      | -0.461 | 0.726 | 2.996 | -1.725 |
| LOC100506497//CTB-113D17.1        | 0.336  | 1.262 | 2.536 | 0.878  |
| LOC100506504//RP11-181G12.2       | 0.018  | 1.013 | 2.590 | 0.073  |
| LOC100506514                      | 0.108  | 1.078 | 2.807 | 0.377  |
| LOC100506544//RP4-756G23.5        | -0.345 | 0.787 | 3.511 | -1.090 |
| LOC100506563                      | 0.495  | 1.409 | 2.189 | 1.661  |
| LOC100506596                      | -0.362 | 0.778 | 2.289 | -1.042 |
| LOC100506674//RP11-53O19.1        | 0.376  | 1.297 | 4.746 | 1.381  |
| LOC100506713//AC027763.2          | -0.462 | 0.726 | 5.286 | -1.811 |
| LOC100506713//AC027763.2          | -0.034 | 0.977 | 5.507 | -0.108 |
| LOC100506725//AC018647.3          | -0.644 | 0.640 | 3.000 | -2.292 |
| LOC100506731//RP11-497E19.1       | 1.684  | 3.212 | 2.932 | 3.367  |
| LOC100506851//RP1-232L24.3        | -0.334 | 0.794 | 5.681 | -1.069 |
| LOC100506885//RP4-625H18.2        | 0.255  | 1.193 | 2.590 | 0.682  |
| LOC100507002                      | 0.088  | 1.063 | 3.260 | 0.352  |
| LOC100507006//AC074289.1          | -0.431 | 0.742 | 4.309 | -1.384 |
| LOC100507054//RP11-1398P2.1       | -0.146 | 0.903 | 2.246 | -0.596 |
| LOC100507140//AC007163.3          | -0.481 | 0.717 | 3.071 | -1.128 |
| LOC100507144//RP4-607I7.1         | -0.309 | 0.807 | 2.335 | -0.785 |
| LOC100507194//RP1-40E16.9         | -0.417 | 0.749 | 3.303 | -1.175 |
| LOC100507316//RP13-582O9.5        | -0.473 | 0.720 | 3.402 | -1.790 |
| LOC100507336//RP1-223B1.1         | -1.832 | 0.281 | 4.245 | -2.823 |
| LOC100507351//RP11-13K12.1        | 1.297  | 2.456 | 3.542 | 2.672  |
| LOC100507395                      | -0.007 | 0.995 | 3.672 | -0.021 |
| LOC100507460                      | 0.173  | 1.127 | 3.089 | 0.671  |
| LOC100507494                      | -0.160 | 0.895 | 2.639 | -0.520 |
| LOC100507507//AC093673.5          | 0.385  | 1.306 | 4.264 | 1.222  |
| LOC100507516//RP11-400K9.4        | -0.706 | 0.613 | 3.352 | -1.472 |
| LOC100507520//RP11-1055B8.4       | -0.323 | 0.799 | 3.669 | -1.227 |
| LOC100507530//CTD-2541M15.3       | -0.437 | 0.739 | 4.074 | -1.596 |
| LOC100507534//AC140542.2          | 0.225  | 1.169 | 1.956 | 0.909  |
| LOC100507535//CTD-2521M24.9//MVB  | -0.303 | 0.811 | 3.370 | -1.309 |
| LOC100507554//AC098820.3          | -0.685 | 0.622 | 3.012 | -2.021 |
| LOC100507564//RP5-1024G6.5        | -0.435 | 0.739 | 2.857 | -1.494 |
| LOC100507577//LONP2               | -0.291 | 0.817 | 5.749 | -1.143 |
| LOC100507599//CTA-445C9.14        | 0.807  | 1.750 | 4.503 | 2.542  |
| LOC100508046//POTEH-AS1//LOC10192 | -0.194 | 0.874 | 2.280 | -0.738 |
| LOC100508227                      | -0.463 | 0.725 | 4.425 | -1.465 |
| LOC100508782//PPIP5K1             | 0.967  | 1.955 | 4.238 | 2.549  |
| LOC100630918                      | 0.313  | 1.243 | 3.639 | 1.276  |
| LOC100652758                      | -0.253 | 0.839 | 2.576 | -0.875 |
| LOC100652768                      | -0.207 | 0.866 | 3.187 | -0.686 |
| LOC100652824//AC079354.1          | 0.308  | 1.238 | 3.064 | 0.841  |

|                                    |        |       |       |        |
|------------------------------------|--------|-------|-------|--------|
| LOC100652901                       | -0.504 | 0.705 | 2.433 | -1.186 |
| LOC100652999//RP11-793H13.3        | -0.744 | 0.597 | 4.320 | -2.648 |
| LOC100653225//OVOS2//LOC10050944   | 0.562  | 1.476 | 2.662 | 1.276  |
| LOC100653515//CTD-2373H9.6         | -0.667 | 0.630 | 3.425 | -2.392 |
| LOC100653515//CTD-2373H9.6         | -0.553 | 0.681 | 3.564 | -1.513 |
| LOC100996348//RP11-317J10.2        | -0.302 | 0.811 | 2.791 | -1.167 |
| LOC100996385//RP11-826N14.2//RP11- | 1.081  | 2.116 | 4.782 | 2.241  |
| LOC100996385//RP11-826N14.2//RP11- | 1.083  | 2.118 | 4.260 | 2.186  |
| LOC100996437//RP4-756H11.3         | -0.736 | 0.600 | 4.038 | -1.884 |
| LOC100996557//RP11-535M15.1        | 0.268  | 1.204 | 4.861 | 0.957  |
| LOC100996664//CTD-2325P2.4         | -0.252 | 0.840 | 4.622 | -0.869 |
| LOC101060341//LINC01347//LOC10106  | -0.604 | 0.658 | 7.974 | -2.371 |
| LOC101060602//AC025627.7           | -0.147 | 0.903 | 2.375 | -0.549 |
| LOC101060691                       | -0.428 | 0.743 | 4.607 | -1.228 |
| LOC101926898//RP11-795J1.1         | -0.781 | 0.582 | 2.415 | -2.119 |
| LOC101926908//RP11-313C15.1        | 0.359  | 1.283 | 2.589 | 0.941  |
| LOC101926964//RP11-436K8.1         | -0.646 | 0.639 | 4.134 | -1.663 |
| LOC101926977//RP11-267M23.4        | -0.404 | 0.756 | 2.707 | -1.470 |
| LOC101926996//AC003102.3           | 0.460  | 1.376 | 2.035 | 1.723  |
| LOC101927040//RP11-26J3.1          | -0.158 | 0.896 | 2.738 | -0.525 |
| LOC101927043                       | -0.524 | 0.695 | 3.108 | -1.712 |
| LOC101927055//RP11-88L24.4         | 0.500  | 1.415 | 3.774 | 1.534  |
| LOC101927057//OMG                  | -0.245 | 0.844 | 3.146 | -0.796 |
| LOC101927063//RP11-310E22.4        | -0.141 | 0.907 | 3.553 | -0.552 |
| LOC101927085//RP11-363E6.3         | -0.298 | 0.813 | 4.146 | -1.275 |
| LOC101927184//LOC100507487//RP11-  | -0.913 | 0.531 | 3.462 | -2.944 |
| LOC101927226//AP000442.1           | -0.234 | 0.851 | 2.173 | -1.019 |
| LOC101927248                       | -0.268 | 0.831 | 3.655 | -0.756 |
| LOC101927270//LOC100996442//LOC10  | -0.218 | 0.860 | 6.450 | -0.837 |
| LOC101927286//CTD-2147F2.2         | 1.615  | 3.062 | 2.517 | 4.229  |
| LOC101927286//CTD-2147F2.2         | 0.606  | 1.522 | 1.949 | 2.381  |
| LOC101927300//RP11-441O15.3        | -0.108 | 0.928 | 3.085 | -0.399 |
| LOC101927314//RP1-104O17.1//RP1-1C | -0.285 | 0.821 | 3.462 | -0.970 |
| LOC101927326//LOC100130157//RP3-4  | -1.287 | 0.410 | 3.529 | -4.043 |
| LOC101927359//RP11-9G1.3           | -0.185 | 0.880 | 4.585 | -0.573 |
| LOC101927397                       | -0.767 | 0.588 | 3.102 | -1.738 |
| LOC101927406//AC018799.1           | 1.528  | 2.884 | 1.594 | 6.082  |
| LOC101927468                       | -0.787 | 0.579 | 5.922 | -2.254 |
| LOC101927473                       | 0.722  | 1.649 | 2.809 | 2.940  |
| LOC101927507//ANO7P1               | -0.004 | 0.997 | 2.457 | -0.014 |
| LOC101927531//RP4-809F18.1         | 1.024  | 2.033 | 1.920 | 2.477  |
| LOC101927532//RP11-552D4.1         | -0.617 | 0.652 | 4.019 | -1.494 |
| LOC101927533//FLJ16124//AC074391.1 | 0.025  | 1.018 | 2.951 | 0.085  |
| LOC101927621//AC074138.3           | 0.295  | 1.227 | 4.623 | 1.312  |
| LOC101927636//RP11-673E1.1         | 0.511  | 1.425 | 2.987 | 1.402  |
| LOC101927646                       | 0.084  | 1.060 | 3.882 | 0.171  |
| LOC101927667//AC012309.5           | -0.818 | 0.567 | 3.021 | -3.076 |
| LOC101927692//RP11-106M7.1         | 0.207  | 1.155 | 5.327 | 0.515  |
| LOC101927699//RP11-38L15.3         | 0.980  | 1.972 | 5.446 | 2.356  |
| LOC101927728//RP11-567L7.6         | 1.565  | 2.958 | 2.441 | 3.358  |

|                                     |        |       |       |        |
|-------------------------------------|--------|-------|-------|--------|
| LOC101927773                        | -0.063 | 0.957 | 2.976 | -0.212 |
| LOC101927789                        | -0.745 | 0.597 | 2.788 | -2.693 |
| LOC101927871                        | 0.790  | 1.729 | 1.796 | 2.233  |
| LOC101927885//CTB-78F1.2            | 0.673  | 1.594 | 1.928 | 2.259  |
| LOC101927895//RP1-43E13.2//LOC2845  | -0.572 | 0.673 | 3.614 | -2.220 |
| LOC101927902//RP11-325F22.2         | 0.194  | 1.144 | 2.656 | 0.729  |
| LOC101927993//RP11-274J16.5         | -0.309 | 0.807 | 3.098 | -0.920 |
| LOC101928020//AC007038.7            | 0.076  | 1.054 | 3.803 | 0.286  |
| LOC101928054//RP11-705C15.3         | -0.455 | 0.729 | 3.138 | -1.484 |
| LOC101928058//RP11-439C15.4         | -0.346 | 0.787 | 4.952 | -0.757 |
| LOC101928062//RP11-320P7.1          | -0.543 | 0.686 | 2.262 | -1.753 |
| LOC101928067//RP1-156L9.1           | 1.135  | 2.196 | 1.798 | 2.810  |
| LOC101928100//RP11-277P12.20        | -0.543 | 0.686 | 2.299 | -1.787 |
| LOC101928102//LOC102723678//LOC10   | -0.088 | 0.941 | 2.503 | -0.157 |
| LOC101928102//RP4-610C12.3          | 0.290  | 1.223 | 2.375 | 0.707  |
| LOC101928111//AC062017.1            | -0.169 | 0.890 | 3.006 | -0.661 |
| LOC101928113                        | -0.678 | 0.625 | 4.407 | -1.144 |
| LOC101928161//AC010890.1            | -0.159 | 0.895 | 2.525 | -0.509 |
| LOC101928174//RP11-814P5.1          | 0.911  | 1.881 | 1.716 | 2.639  |
| LOC101928188//RP11-426C22.4         | -0.671 | 0.628 | 2.333 | -1.709 |
| LOC101928246                        | 0.236  | 1.177 | 2.968 | 0.944  |
| LOC101928258                        | 0.522  | 1.436 | 2.061 | 2.220  |
| LOC101928279                        | 0.172  | 1.127 | 2.471 | 0.718  |
| LOC101928290//RP11-695J4.2          | -0.143 | 0.906 | 2.713 | -0.537 |
| LOC101928300//RP11-728G15.1         | 1.134  | 2.194 | 2.727 | 2.269  |
| LOC101928304//RP11-557H15.4         | -0.488 | 0.713 | 3.348 | -1.376 |
| LOC101928335//RP6-191P20.4          | 0.777  | 1.714 | 2.048 | 1.706  |
| LOC101928344//LINC01347//LOC72921   | -0.389 | 0.763 | 6.627 | -1.451 |
| LOC101928370//RP4-575N6.4           | 0.303  | 1.233 | 3.447 | 1.094  |
| LOC101928387                        | 0.513  | 1.427 | 2.935 | 1.726  |
| LOC101928424//RP11-315O6.1          | -0.273 | 0.828 | 3.224 | -1.079 |
| LOC101928433//RP1-151F17.1          | -0.054 | 0.963 | 3.765 | -0.245 |
| LOC101928436//RP11-153F1.1          | 0.520  | 1.434 | 2.665 | 1.301  |
| LOC101928470//RP11-490D19.6         | -0.480 | 0.717 | 3.226 | -1.744 |
| LOC101928483//RP11-611D20.2//LOC24  | -0.064 | 0.957 | 2.646 | -0.208 |
| LOC101928489//RP11-553A21.3         | -0.062 | 0.958 | 3.321 | -0.210 |
| LOC101928545//AC007551.3            | -0.452 | 0.731 | 4.224 | -1.932 |
| LOC101928564                        | -0.380 | 0.769 | 2.325 | -1.067 |
| LOC101928576//AP001055.6            | -0.177 | 0.885 | 3.051 | -0.718 |
| LOC101928583//RP11-373E16.3         | -0.319 | 0.802 | 2.245 | -1.046 |
| LOC101928590//RP11-806K15.1         | 0.687  | 1.610 | 2.027 | 2.383  |
| LOC101928633                        | 0.170  | 1.125 | 2.245 | 0.391  |
| LOC101928670//FAM157A               | -0.256 | 0.837 | 4.598 | -0.685 |
| LOC101928670//RP11-206L10.3//RP11-: | -0.321 | 0.800 | 5.953 | -1.255 |
| LOC101928670//RP11-206L10.3//RP11-: | -0.335 | 0.793 | 5.961 | -1.249 |
| LOC101928706//LOC101929823//LINC0   | -0.447 | 0.734 | 7.219 | -1.928 |
| LOC101928706//LOC101929823//RP5-8   | 0.341  | 1.267 | 4.500 | 0.820  |
| LOC101928737//RP11-482M8.1          | 0.423  | 1.340 | 2.302 | 1.896  |
| LOC101928738//RP11-353N14.4         | -0.519 | 0.698 | 3.032 | -1.597 |
| LOC101928762//STX4                  | -0.714 | 0.610 | 3.231 | -2.204 |

|                                                                      |        |       |       |        |
|----------------------------------------------------------------------|--------|-------|-------|--------|
| LOC101928792                                                         | -1.844 | 0.279 | 3.907 | -4.399 |
| LOC101928794//MAST4-AS1                                              | -0.167 | 0.890 | 2.217 | -0.707 |
| LOC101928817//RP11-356K23.1                                          | -0.072 | 0.951 | 2.031 | -0.195 |
| LOC101928829//RP11-452L6.7                                           | -0.481 | 0.716 | 4.028 | -1.615 |
| LOC101928832                                                         | -0.948 | 0.518 | 4.174 | -1.737 |
| LOC101928913//RP11-222A11.1                                          | -0.793 | 0.577 | 4.564 | -1.715 |
| LOC101928913//RP11-222A11.1                                          | -0.131 | 0.913 | 2.346 | -0.420 |
| LOC101928979                                                         | -0.124 | 0.917 | 3.304 | -0.322 |
| LOC101928989//RP11-179A16.1                                          | 0.214  | 1.160 | 3.182 | 0.502  |
| LOC101929008//LOC101929038//LOC101929038//LOC101926894//LINC01929054 | -0.323 | 0.799 | 7.479 | -0.959 |
| LOC101929038//LOC101926894//LINC01929054                             | -0.264 | 0.833 | 7.667 | -0.991 |
| LOC101929054                                                         | -0.029 | 0.980 | 2.943 | -0.123 |
| LOC101929066//CTD-2547L16.1                                          | 0.014  | 1.010 | 3.305 | 0.045  |
| LOC101929108//RP11-259O2.1                                           | 0.467  | 1.383 | 2.464 | 1.965  |
| LOC101929118//RP11-10L7.1                                            | 0.213  | 1.159 | 2.652 | 0.510  |
| LOC101929132                                                         | 0.100  | 1.072 | 2.887 | 0.284  |
| LOC101929179//RP11-143M1.3                                           | 1.375  | 2.594 | 2.078 | 5.299  |
| LOC101929237//RP11-87E22.2                                           | 0.408  | 1.326 | 2.074 | 1.144  |
| LOC101929289                                                         | -0.246 | 0.843 | 3.150 | -0.722 |
| LOC101929302//RP11-509J21.1                                          | -0.291 | 0.817 | 4.090 | -0.745 |
| LOC101929302//RP11-509J21.3                                          | -0.494 | 0.710 | 4.751 | -1.327 |
| LOC101929307                                                         | 0.052  | 1.037 | 2.269 | 0.187  |
| LOC101929331//RP11-344B5.2                                           | -0.455 | 0.729 | 2.987 | -1.827 |
| LOC101929514                                                         | 0.494  | 1.409 | 2.106 | 2.160  |
| LOC101929515//LINC00951//RP11-552E11.1                               | 1.063  | 2.089 | 2.337 | 3.098  |
| LOC101929544                                                         | 1.407  | 2.651 | 2.164 | 4.547  |
| LOC101929587//LOC101927777//LOC101929595//RP11-286E11.1              | 0.835  | 1.784 | 3.532 | 2.937  |
| LOC101929595//RP11-286E11.1                                          | -0.685 | 0.622 | 2.644 | -2.138 |
| LOC101929625                                                         | 1.059  | 2.084 | 2.424 | 2.750  |
| LOC101929634//RP11-982M15.8                                          | -0.272 | 0.828 | 4.287 | -1.180 |
| LOC101929643                                                         | 0.166  | 1.122 | 3.236 | 0.574  |
| LOC101929668//LOC100507419//RP11-982M15.6                            | -0.003 | 0.998 | 2.674 | -0.010 |
| LOC101929679                                                         | -0.313 | 0.805 | 2.463 | -1.211 |
| LOC101929709//RP11-37B2.1                                            | -0.147 | 0.903 | 5.137 | -0.522 |
| LOC101929761//RP11-195F19.9//LOC731                                  | -0.117 | 0.922 | 4.479 | -0.444 |
| LOC101929777//WNT3                                                   | 0.382  | 1.303 | 4.874 | 0.624  |
| LOC101929787                                                         | -1.213 | 0.431 | 3.942 | -2.780 |
| LOC101929920//LOC101930237//AB015                                    | -0.592 | 0.664 | 2.147 | -2.121 |
| LOC101929949//RP11-982M15.6                                          | -0.350 | 0.784 | 3.031 | -1.331 |
| LOC101929964//LINC01184//CTC-228N1                                   | 0.094  | 1.067 | 3.320 | 0.305  |
| LOC101930100//LOC101928669//LOC101930275//RP11-806O11.1              | -0.042 | 0.971 | 6.777 | -0.105 |
| LOC101930275//RP11-806O11.1                                          | -0.883 | 0.542 | 3.918 | -2.693 |
| LOC101930276                                                         | -0.655 | 0.635 | 3.788 | -1.192 |
| LOC101930277//RP11-166O4.1                                           | -0.018 | 0.988 | 4.016 | -0.057 |
| LOC101930305//RP11-341G23.4                                          | -0.225 | 0.856 | 3.381 | -0.683 |
| LOC101930415//RP11-732M18.3//TULP1                                   | 0.110  | 1.079 | 8.127 | 0.528  |
| LOC101930421//RP11-809C18.3                                          | -0.522 | 0.696 | 5.280 | -1.216 |
| LOC101930532//LOC101930156//RP11-809C18.3                            | -0.279 | 0.824 | 4.213 | -1.051 |
| LOC101930595//RP11-326C3.2//ATHL1                                    | -0.412 | 0.752 | 2.748 | -1.654 |
| LOC101930599//LENG8-AS1                                              | -0.552 | 0.682 | 4.116 | -2.084 |

|                                   |        |       |       |        |
|-----------------------------------|--------|-------|-------|--------|
| LOC101930660//RP11-380O24.1       | -0.489 | 0.712 | 3.933 | -1.887 |
| LOC101930660//RP11-380O24.1       | -0.506 | 0.704 | 2.461 | -1.516 |
| LOC101930660//RP11-380O24.1       | 0.130  | 1.094 | 4.606 | 0.490  |
| LOC102546299//CTC-340A15.2        | 1.156  | 2.229 | 2.003 | 4.265  |
| LOC102577424//RP11-375B1.3        | 0.401  | 1.320 | 4.305 | 1.184  |
| LOC102723350//RP11-262I2.2        | 0.426  | 1.344 | 2.294 | 1.600  |
| LOC102723392                      | 0.597  | 1.513 | 2.001 | 1.720  |
| LOC102723403                      | 0.863  | 1.819 | 2.429 | 2.999  |
| LOC102723466//RP11-441F2.2        | -0.568 | 0.675 | 3.520 | -2.028 |
| LOC102723493//RP11-798K3.2        | -0.118 | 0.921 | 2.515 | -0.500 |
| LOC102723521//RP11-513I15.6       | 0.568  | 1.483 | 4.403 | 1.992  |
| LOC102723544//RP11-283I3.4        | -0.659 | 0.633 | 2.562 | -2.018 |
| LOC102723619//RP11-686G8.2        | -0.019 | 0.987 | 3.213 | -0.060 |
| LOC102723630//LOC100505874        | 0.742  | 1.672 | 5.201 | 1.073  |
| LOC102723676                      | 0.949  | 1.931 | 3.108 | 2.557  |
| LOC102723678//LOC102723709//RP11- | -0.616 | 0.652 | 3.428 | -1.913 |
| LOC102723724//RP3-460G2.2         | -0.162 | 0.894 | 3.029 | -0.414 |
| LOC102723736//RP1-153P14.5        | -0.064 | 0.957 | 2.654 | -0.223 |
| LOC102723779//RP11-326I11.3       | -0.526 | 0.695 | 3.911 | -1.539 |
| LOC102723817//RP11-100E13.1       | 1.057  | 2.081 | 2.410 | 3.502  |
| LOC102723828//RP11-734I18.1       | 0.058  | 1.041 | 2.182 | 0.187  |
| LOC102723854//AC016735.2          | -0.331 | 0.795 | 2.362 | -1.348 |
| LOC102723894//AP003774.6          | -0.203 | 0.869 | 2.880 | -0.725 |
| LOC102723895//RP11-886D15.1       | 0.973  | 1.963 | 1.502 | 3.377  |
| LOC102723899//CDK14//CLDN12//ACOC | 1.108  | 2.156 | 4.468 | 2.763  |
| LOC102723927//AC093642.3          | -0.104 | 0.930 | 2.525 | -0.375 |
| LOC102724094//RP11-395B7.4        | 0.392  | 1.312 | 2.507 | 1.174  |
| LOC102724129                      | 0.386  | 1.307 | 2.508 | 1.050  |
| LOC102724155                      | 0.114  | 1.082 | 2.805 | 0.443  |
| LOC102724156                      | 0.584  | 1.499 | 3.729 | 2.315  |
| LOC102724312                      | -0.448 | 0.733 | 2.242 | -1.616 |
| LOC102724314//FAM95B1//LOC101928  | -0.073 | 0.951 | 4.194 | -0.241 |
| LOC102724351                      | 0.466  | 1.381 | 2.254 | 1.610  |
| LOC102724425                      | 0.901  | 1.868 | 3.349 | 2.838  |
| LOC102724530                      | 0.016  | 1.011 | 2.500 | 0.061  |
| LOC102724532//LOC100506325//RP11- | 0.040  | 1.028 | 4.484 | 0.147  |
| LOC102724596//RP11-1079K10.2      | -1.423 | 0.373 | 2.784 | -2.651 |
| LOC102724596//RP11-1079K10.3      | -1.053 | 0.482 | 2.465 | -2.400 |
| LOC102724640                      | -0.054 | 0.963 | 2.824 | -0.182 |
| LOC102724646                      | 0.154  | 1.113 | 2.430 | 0.319  |
| LOC102724679//AP000343.2          | -0.470 | 0.722 | 4.454 | -1.195 |
| LOC102724687                      | 0.016  | 1.011 | 2.628 | 0.057  |
| LOC102724731                      | -0.479 | 0.718 | 3.273 | -1.268 |
| LOC102724768                      | -0.594 | 0.663 | 3.743 | -1.898 |
| LOC102724814//RP11-66N24.3        | -0.342 | 0.789 | 2.810 | -1.294 |
| LOC102724834                      | 1.961  | 3.895 | 2.773 | 2.928  |
| LOC102724842//RP11-597D13.8       | -0.836 | 0.560 | 2.500 | -2.020 |
| LOC102724851                      | -0.308 | 0.808 | 5.558 | -0.929 |
| LOC102724883                      | -0.164 | 0.892 | 4.148 | -0.634 |
| LOC102724970//LOC100133616        | 0.249  | 1.189 | 2.759 | 0.901  |



|                                    |        |       |       |        |
|------------------------------------|--------|-------|-------|--------|
| LOC102725086//AC090952.5           | -0.450 | 0.732 | 2.270 | -1.607 |
| LOC102725236//BAGE2//RP11-763B22.! | -0.203 | 0.869 | 4.596 | -0.724 |
| LOC102725258                       | -0.298 | 0.813 | 2.856 | -0.873 |
| LOC102725378                       | -0.036 | 0.975 | 2.370 | -0.118 |
| LOC102725394                       | -0.273 | 0.828 | 5.251 | -0.624 |
| LOC102725417                       | 0.168  | 1.123 | 4.704 | 0.759  |
| LOC102725458                       | -0.109 | 0.928 | 2.970 | -0.353 |
| LOC103344931//RP11-57H14.4         | 0.174  | 1.128 | 5.268 | 0.720  |
| LOC145474                          | -0.016 | 0.989 | 3.139 | -0.062 |
| LOC150776//AC093838.4              | -0.291 | 0.818 | 5.316 | -1.091 |
| LOC151760//RP11-553A10.1           | 0.440  | 1.356 | 3.484 | 1.552  |
| LOC153684//AC025171.1              | -0.707 | 0.613 | 2.677 | -2.355 |
| LOC154761//RP11-61L23.2            | 0.088  | 1.063 | 4.012 | 0.170  |
| LOC166994                          | -0.117 | 0.922 | 3.319 | -0.306 |
| LOC220729//AC024560.3              | 0.249  | 1.188 | 7.262 | 1.200  |
| LOC257396//CTD-2366F13.1           | -0.358 | 0.780 | 3.716 | -1.273 |
| LOC283045                          | 0.404  | 1.323 | 2.839 | 1.287  |
| LOC283335//RP11-983P16.4           | -0.103 | 0.931 | 4.620 | -0.323 |
| LOC283588//RPS6KA5                 | 0.691  | 1.615 | 4.278 | 2.893  |
| LOC283692//RP11-752G15.3           | -0.269 | 0.830 | 2.861 | -0.964 |
| LOC283693//RP11-752G15.9           | -0.261 | 0.835 | 2.395 | -0.886 |
| LOC283731//RP11-247C2.2            | 0.480  | 1.394 | 2.138 | 1.506  |
| LOC284023//AC025335.1              | 0.303  | 1.234 | 3.824 | 1.182  |
| LOC284395//CTC-525D6.1             | 0.039  | 1.027 | 2.727 | 0.149  |
| LOC284412                          | -0.559 | 0.679 | 4.086 | -1.469 |
| LOC284578                          | 0.423  | 1.341 | 3.631 | 0.924  |
| LOC284648//RP11-317P15.4           | -0.026 | 0.982 | 2.089 | -0.109 |
| LOC284926                          | -0.109 | 0.927 | 2.606 | -0.365 |
| LOC284930//RP11-191L9.4            | 0.433  | 1.350 | 2.238 | 1.117  |
| LOC285484//RP11-586D19.1           | 0.512  | 1.426 | 2.840 | 1.650  |
| LOC285696//AC091878.1              | 1.375  | 2.593 | 3.592 | 2.823  |
| LOC285857                          | -0.346 | 0.787 | 2.260 | -1.274 |
| LOC286367                          | 0.461  | 1.377 | 3.743 | 1.788  |
| LOC286437                          | -0.487 | 0.713 | 4.559 | -1.882 |
| LOC374443//RP11-705C15.2//RP11-705 | -0.240 | 0.847 | 3.705 | -0.751 |
| LOC374890//AC011516.2              | 0.658  | 1.578 | 2.324 | 2.025  |
| LOC388572//LOC101060494//LOC10192  | -0.349 | 0.785 | 5.018 | -1.234 |
| LOC388849//AC006547.14             | 0.319  | 1.248 | 3.218 | 1.215  |
| LOC389607                          | -0.303 | 0.810 | 3.015 | -1.213 |
| LOC389705                          | -0.190 | 0.877 | 3.569 | -0.499 |
| LOC389831//LOC102724951            | -0.835 | 0.560 | 4.708 | -1.988 |
| LOC389834                          | -0.311 | 0.806 | 2.874 | -0.571 |
| LOC390705//RP11-17M15.2            | -0.159 | 0.896 | 2.886 | -0.543 |
| LOC390937//CTD-2575K13.6           | 0.063  | 1.045 | 2.119 | 0.210  |
| LOC399491//RP11-958N24.2           | -1.361 | 0.389 | 3.705 | -2.255 |
| LOC399715//RP11-563J2.2            | -0.583 | 0.667 | 3.719 | -1.585 |
| LOC399900                          | -0.589 | 0.665 | 3.185 | -1.855 |
| LOC400043//RP11-834C11.4           | -1.145 | 0.452 | 3.741 | -3.036 |
| LOC400553//RP11-863P13.4           | 0.115  | 1.083 | 2.714 | 0.425  |
| LOC400558//RP11-46C24.3            | -0.270 | 0.829 | 2.598 | -1.211 |

|                                     |        |       |       |        |
|-------------------------------------|--------|-------|-------|--------|
| LOC400622//RP11-13K12.2             | 0.046  | 1.032 | 2.131 | 0.178  |
| LOC400706                           | 0.511  | 1.425 | 4.019 | 1.239  |
| LOC400743//RP11-380J14.1            | -0.820 | 0.567 | 2.370 | -2.682 |
| LOC400927//RP3-449O17.1             | -0.078 | 0.948 | 5.539 | -0.273 |
| LOC400940//AC073479.1               | -0.815 | 0.568 | 3.125 | -2.051 |
| LOC401134//RP11-707A18.1            | 0.116  | 1.083 | 3.770 | 0.356  |
| LOC401320//LOC101928623//AC005154   | -0.430 | 0.742 | 5.157 | -1.456 |
| LOC401357                           | 0.318  | 1.247 | 2.436 | 1.180  |
| LOC401357                           | -0.043 | 0.970 | 2.405 | -0.136 |
| LOC407835//RP11-286H14.4            | -0.044 | 0.970 | 2.834 | -0.151 |
| LOC414300//RP11-61E11.2             | -0.193 | 0.875 | 2.465 | -0.787 |
| LOC440040//RP11-707M1.1             | 1.280  | 2.428 | 2.477 | 2.309  |
| LOC440149                           | -0.765 | 0.589 | 4.085 | -1.891 |
| LOC440300                           | 0.598  | 1.513 | 2.177 | 2.004  |
| LOC440896                           | 0.570  | 1.485 | 2.404 | 2.088  |
| LOC441081//LOC101929573//LOC1010106 | -0.549 | 0.683 | 6.943 | -1.446 |
| LOC441081//LOC101929573//LOC1010106 | -0.471 | 0.721 | 6.405 | -1.241 |
| LOC441081//LOC102725466//LOC16695   | -0.515 | 0.700 | 3.858 | -1.458 |
| LOC441204                           | 0.272  | 1.207 | 3.710 | 1.098  |
| LOC441268//RP11-481A20.11           | -0.155 | 0.898 | 7.343 | -0.497 |
| LOC613037//LOC101929910//RP11-347   | -0.402 | 0.757 | 9.656 | -1.697 |
| LOC642236//RP11-764K9.4             | -0.327 | 0.797 | 2.647 | -0.902 |
| LOC642361//LOC439994//RP11-182L21   | 0.089  | 1.063 | 3.213 | 0.230  |
| LOC642776//RP11-761E20.1            | 0.072  | 1.051 | 3.706 | 0.276  |
| LOC642846//RP11-22B23.1             | 0.264  | 1.201 | 2.318 | 1.041  |
| LOC642852                           | 0.527  | 1.441 | 4.149 | 2.311  |
| LOC642934                           | -0.326 | 0.798 | 3.193 | -0.450 |
| LOC643355//RP11-88H9.2              | 0.020  | 1.014 | 2.376 | 0.063  |
| LOC644172//RP11-259G18.2//RP11-707  | 0.112  | 1.081 | 5.208 | 0.296  |
| LOC644450                           | -0.377 | 0.770 | 4.773 | -0.696 |
| LOC644669//AP005901.1               | 0.347  | 1.272 | 2.174 | 1.239  |
| LOC644794//RP11-458F8.4             | -0.880 | 0.543 | 4.335 | -2.387 |
| LOC645321//RP11-849I19.1            | -0.506 | 0.704 | 5.155 | -2.100 |
| LOC645513//RP11-33B1.1              | -0.099 | 0.934 | 5.152 | -0.335 |
| LOC645513//RP11-33B1.1              | -0.059 | 0.960 | 5.661 | -0.168 |
| LOC645752//RP11-114H24.2            | 0.007  | 1.005 | 2.711 | 0.014  |
| LOC646214                           | -0.017 | 0.988 | 2.413 | -0.060 |
| LOC646241//RP11-454P21.1            | 0.152  | 1.111 | 2.069 | 0.530  |
| LOC646719                           | 0.427  | 1.344 | 5.216 | 1.948  |
| LOC646778//RP11-549B18.1            | 0.490  | 1.405 | 2.647 | 1.353  |
| LOC647264//LOC101927016             | 0.370  | 1.293 | 4.157 | 1.330  |
| LOC647859//RP11-195E2.1             | -1.223 | 0.428 | 4.286 | -2.186 |
| LOC650226//RP13-492C18.2            | -0.778 | 0.583 | 3.343 | -1.420 |
| LOC651337                           | -0.134 | 0.911 | 2.735 | -0.522 |
| LOC652276//AC141586.5               | 0.063  | 1.044 | 4.982 | 0.254  |
| LOC653513                           | -0.038 | 0.974 | 5.918 | -0.093 |
| LOC654342                           | -0.054 | 0.963 | 5.818 | -0.161 |
| LOC727896                           | -0.318 | 0.802 | 8.585 | -1.107 |
| LOC728084//RP11-13A1.1              | 1.183  | 2.271 | 1.814 | 2.710  |
| LOC728392//NLRP1                    | 0.184  | 1.136 | 9.756 | 0.719  |

|                                   |        |       |       |        |
|-----------------------------------|--------|-------|-------|--------|
| LOC728485//CTD-2162K18.4          | 0.703  | 1.628 | 3.200 | 2.412  |
| LOC728554//RP11-423H2.1           | 0.160  | 1.117 | 5.776 | 0.531  |
| LOC728613//RP11-43F13.1           | -0.050 | 0.966 | 4.124 | -0.145 |
| LOC728730//AC007246.3             | 0.513  | 1.427 | 3.032 | 2.239  |
| LOC728739//RP11-554D14.2          | 0.014  | 1.010 | 2.287 | 0.044  |
| LOC728752//CTD-2630F21.1          | -0.178 | 0.884 | 3.773 | -0.666 |
| LOC729305//RP11-469N6.1           | -0.014 | 0.991 | 2.282 | -0.042 |
| LOC729658                         | -0.783 | 0.581 | 3.209 | -1.772 |
| LOC729737                         | -0.493 | 0.711 | 5.825 | -1.796 |
| LOC729739//MIR7975//CTD-2311M21.2 | 0.128  | 1.093 | 2.484 | 0.405  |
| LOC729770//CTD-2308L22.1          | 0.372  | 1.294 | 2.372 | 1.023  |
| LOC729870                         | 0.477  | 1.392 | 2.188 | 1.875  |
| LOC729911//RP11-17L5.4            | 0.651  | 1.570 | 2.935 | 1.719  |
| LOC729970//RP4-639F20.1           | 0.365  | 1.288 | 4.255 | 1.127  |
| LOC730081//RP5-884G6.2            | 0.244  | 1.184 | 2.925 | 1.087  |
| LOC730183//RP11-146F11.1          | -0.307 | 0.808 | 3.158 | -1.167 |
| LOC81691//AC004381.6              | 0.469  | 1.384 | 2.903 | 2.162  |
| LOC90784//POLR1A                  | 0.249  | 1.188 | 4.347 | 1.040  |
| LOC93432//RP11-1220K2.2           | -0.713 | 0.610 | 3.389 | -3.006 |
| LOC93432//RP11-1220K2.2           | 0.059  | 1.042 | 2.168 | 0.157  |
| LOC93432//RP11-1220K2.2           | -0.024 | 0.983 | 2.528 | -0.082 |
| LOC93622//AC093323.3              | 0.285  | 1.218 | 4.028 | 1.121  |
| LONRF1                            | 0.426  | 1.344 | 5.461 | 1.719  |
| LONRF2                            | 0.647  | 1.566 | 7.862 | 1.976  |
| LOX                               | 0.364  | 1.287 | 2.609 | 1.589  |
| LOXL1                             | 0.086  | 1.061 | 3.014 | 0.375  |
| LOXL2                             | -0.280 | 0.824 | 4.520 | -0.914 |
| LOXL3                             | -0.527 | 0.694 | 3.901 | -2.209 |
| LPAR1                             | -1.217 | 0.430 | 8.463 | -3.514 |
| LPAR3                             | 0.758  | 1.691 | 2.292 | 1.739  |
| LPAR4                             | -0.472 | 0.721 | 3.623 | -1.197 |
| LPAR5                             | -0.630 | 0.646 | 3.554 | -1.721 |
| LPAR6                             | -0.446 | 0.734 | 2.723 | -1.374 |
| LPCAT2                            | -0.842 | 0.558 | 7.050 | -2.362 |
| LPCAT3                            | -0.251 | 0.840 | 5.758 | -1.162 |
| LPCAT4                            | 0.647  | 1.566 | 6.008 | 1.955  |
| LPEQ6126                          | 0.131  | 1.095 | 3.066 | 0.408  |
| LPGAT1                            | -0.108 | 0.928 | 6.975 | -0.558 |
| LPHN1                             | 0.551  | 1.465 | 7.190 | 2.166  |
| LPHN2//LOC101927458               | 1.252  | 2.381 | 5.328 | 2.605  |
| LPHN3                             | 0.287  | 1.220 | 7.098 | 1.384  |
| LPL                               | 0.098  | 1.071 | 3.490 | 0.281  |
| LPP                               | 0.142  | 1.103 | 3.569 | 0.598  |
| LPP-AS2                           | -0.268 | 0.830 | 4.275 | -0.853 |
| LPPR1                             | -0.790 | 0.578 | 4.981 | -2.216 |
| LPPR3                             | 1.154  | 2.225 | 4.515 | 2.181  |
| LPPR4//RP4-788L13.1               | 1.443  | 2.719 | 5.972 | 2.459  |
| LPPR5                             | 0.921  | 1.893 | 4.004 | 1.855  |
| LPXN                              | 0.131  | 1.095 | 5.112 | 0.440  |
| LRAT//LOC101927965                | -0.381 | 0.768 | 2.665 | -1.012 |

|                      |        |       |       |        |
|----------------------|--------|-------|-------|--------|
| LARCH4               | -0.514 | 0.701 | 3.254 | -1.623 |
| LRFN1                | 0.553  | 1.467 | 3.481 | 1.696  |
| LRFN2                | 1.007  | 2.009 | 3.530 | 2.373  |
| LRFN5                | 1.382  | 2.607 | 5.492 | 2.800  |
| LRG1                 | 0.134  | 1.097 | 3.555 | 0.382  |
| LRIG3                | -0.607 | 0.657 | 3.932 | -2.189 |
| LRP10                | -0.280 | 0.824 | 4.895 | -1.251 |
| LRP11                | 0.041  | 1.029 | 4.778 | 0.194  |
| LRP12                | 0.433  | 1.350 | 5.433 | 1.696  |
| LRP1B                | 0.424  | 1.342 | 6.929 | 1.937  |
| LRP2                 | -1.784 | 0.290 | 6.489 | -2.817 |
| LRP2BP               | -0.657 | 0.634 | 5.169 | -1.906 |
| LRP3                 | 0.588  | 1.503 | 4.638 | 2.014  |
| LRP5                 | -0.518 | 0.699 | 4.536 | -1.878 |
| LRP8                 | 0.420  | 1.338 | 5.168 | 1.665  |
| LRR1                 | -0.891 | 0.539 | 5.580 | -2.506 |
| LRR10B               | 0.039  | 1.027 | 3.100 | 0.102  |
| LRR16A               | 0.486  | 1.401 | 6.552 | 1.993  |
| LRR2                 | 1.043  | 2.060 | 3.435 | 2.592  |
| LRR24                | -0.043 | 0.971 | 3.190 | -0.161 |
| LRR25                | -0.163 | 0.893 | 2.599 | -0.511 |
| LRR32                | 0.159  | 1.117 | 4.315 | 0.411  |
| LRR37A2              | -0.600 | 0.660 | 6.276 | -1.982 |
| LRR37A3              | 0.208  | 1.155 | 4.775 | 0.542  |
| LRR37A6P             | 0.047  | 1.033 | 3.611 | 0.168  |
| LRR37B//LOC101929841 | 0.027  | 1.019 | 4.725 | 0.097  |
| LRR38                | 0.481  | 1.396 | 2.390 | 1.907  |
| LRR39                | 0.490  | 1.405 | 3.870 | 1.729  |
| LRR3B                | 0.247  | 1.187 | 3.594 | 0.930  |
| LRR4                 | 0.795  | 1.735 | 4.420 | 2.058  |
| LRR40                | 0.341  | 1.267 | 5.444 | 1.312  |
| LRR46                | -0.161 | 0.894 | 2.088 | -0.449 |
| LRR48                | -0.324 | 0.799 | 3.259 | -0.916 |
| LRR49                | 0.477  | 1.392 | 3.997 | 1.893  |
| LRR4C                | 0.315  | 1.244 | 6.515 | 1.303  |
| LRR53                | 0.627  | 1.545 | 1.899 | 1.417  |
| LRR55                | 0.684  | 1.607 | 4.774 | 1.854  |
| LRR57                | 0.341  | 1.266 | 5.329 | 1.580  |
| LRR6                 | 0.620  | 1.536 | 4.843 | 2.444  |
| LRR63                | -0.942 | 0.521 | 4.263 | -1.979 |
| LRR7                 | 1.012  | 2.017 | 1.758 | 3.281  |
| LRR7                 | 1.032  | 2.045 | 5.759 | 2.079  |
| LRR71                | -0.112 | 0.925 | 2.409 | -0.496 |
| LRR73                | 0.939  | 1.917 | 3.700 | 2.376  |
| LRR8B                | 0.412  | 1.330 | 6.388 | 1.223  |
| LRR9                 | 0.159  | 1.117 | 2.082 | 0.400  |
| LRRCC1               | -0.209 | 0.865 | 4.855 | -0.676 |
| LRRFIP1              | 0.618  | 1.535 | 5.274 | 2.546  |
| LRRK1                | 0.555  | 1.469 | 4.174 | 1.909  |
| LRRK2                | 0.438  | 1.354 | 5.969 | 1.463  |

|                         |        |       |       |        |
|-------------------------|--------|-------|-------|--------|
| LRRN1                   | -0.026 | 0.982 | 4.897 | -0.091 |
| LRRN2                   | 0.122  | 1.088 | 4.390 | 0.468  |
| LRRN3                   | 0.882  | 1.843 | 4.482 | 2.291  |
| LRRTM1                  | 0.955  | 1.938 | 4.679 | 2.586  |
| LRRTM2                  | 0.461  | 1.376 | 7.272 | 1.273  |
| LRRTM3//RP11-68P3.2     | 0.748  | 1.680 | 6.297 | 2.167  |
| LRRTM4                  | 1.017  | 2.023 | 5.519 | 2.336  |
| LRTM2                   | 0.371  | 1.293 | 3.419 | 1.065  |
| LSM11                   | 0.877  | 1.837 | 4.017 | 2.576  |
| LSM7                    | -0.125 | 0.917 | 4.340 | -0.540 |
| LSMEM2                  | -0.428 | 0.743 | 3.117 | -1.547 |
| LSP1                    | 0.121  | 1.088 | 2.931 | 0.473  |
| LSR                     | -0.214 | 0.862 | 4.138 | -0.838 |
| LSS                     | -0.941 | 0.521 | 6.877 | -3.012 |
| LST1                    | -0.423 | 0.746 | 3.855 | -1.516 |
| LST1                    | -0.421 | 0.747 | 3.633 | -1.479 |
| LST1                    | -0.407 | 0.754 | 3.637 | -1.431 |
| LST1                    | -0.411 | 0.752 | 3.564 | -1.371 |
| LST1                    | -0.375 | 0.771 | 3.478 | -1.328 |
| LST1                    | -0.384 | 0.766 | 3.527 | -1.306 |
| LTB4R                   | -0.036 | 0.975 | 2.412 | -0.117 |
| LTBP1                   | -0.088 | 0.941 | 5.644 | -0.353 |
| LTBP2                   | 0.166  | 1.122 | 3.990 | 0.706  |
| LTBP3                   | -0.307 | 0.808 | 5.913 | -1.452 |
| LTBP4                   | 0.389  | 1.309 | 4.724 | 1.110  |
| LTBR                    | -0.238 | 0.848 | 6.085 | -0.961 |
| LTF                     | -0.199 | 0.871 | 4.217 | -0.270 |
| LTN1                    | 0.066  | 1.047 | 6.147 | 0.251  |
| LUCAT1                  | -0.286 | 0.820 | 2.744 | -0.671 |
| LUM                     | 0.772  | 1.707 | 3.045 | 2.234  |
| LURAP1L                 | 0.163  | 1.119 | 5.127 | 0.551  |
| LUZP1                   | 0.616  | 1.533 | 5.638 | 1.898  |
| LUZP2                   | -0.528 | 0.693 | 7.175 | -1.661 |
| LY6E                    | 0.328  | 1.255 | 3.666 | 1.161  |
| LY6H                    | 0.735  | 1.665 | 3.479 | 2.319  |
| LY75-CD302//LY75//CD302 | -0.013 | 0.991 | 4.657 | -0.051 |
| LY86                    | -0.468 | 0.723 | 6.828 | -1.044 |
| LY86-AS1                | 1.003  | 2.004 | 2.368 | 2.100  |
| LYAR                    | -0.284 | 0.821 | 3.085 | -0.981 |
| LYL1                    | -0.360 | 0.779 | 3.739 | -1.591 |
| LYN                     | -0.025 | 0.983 | 5.840 | -0.073 |
| LYNX1                   | 0.411  | 1.330 | 4.015 | 1.620  |
| LYPD1                   | -0.564 | 0.676 | 4.312 | -1.757 |
| LYPD5                   | 0.229  | 1.172 | 5.475 | 0.974  |
| LYPD8//XX-CR54.3        | 1.095  | 2.136 | 1.792 | 2.578  |
| LYSMD1                  | 0.019  | 1.013 | 4.686 | 0.085  |
| LYSMD2                  | 0.655  | 1.575 | 4.160 | 2.471  |
| LYSMD4                  | 0.069  | 1.049 | 3.697 | 0.257  |
| LYST                    | -0.157 | 0.897 | 3.261 | -0.492 |
| LYVE1                   | 0.820  | 1.765 | 6.937 | 1.624  |

|                           |        |       |       |        |
|---------------------------|--------|-------|-------|--------|
| LYZ                       | -0.433 | 0.741 | 4.831 | -0.843 |
| LZTFL1                    | 0.446  | 1.362 | 3.530 | 2.049  |
| LZTS1                     | 1.068  | 2.096 | 4.032 | 2.186  |
| LZTS2                     | -0.675 | 0.626 | 4.566 | -2.645 |
| LZTS3//RP5-1187M17.10     | 0.761  | 1.695 | 4.833 | 2.407  |
| MAATS1                    | 0.035  | 1.025 | 4.015 | 0.154  |
| MAB21L1//MIR548F5         | -0.359 | 0.780 | 2.582 | -0.912 |
| MAB21L2                   | -1.486 | 0.357 | 3.728 | -1.909 |
| MACROD2                   | 0.578  | 1.493 | 2.989 | 2.658  |
| MAD2L1                    | 0.235  | 1.177 | 2.767 | 0.962  |
| MADCAM1                   | -0.559 | 0.679 | 2.254 | -2.042 |
| MADD                      | 0.453  | 1.369 | 6.467 | 1.927  |
| MAEL                      | 0.759  | 1.693 | 2.151 | 3.146  |
| MAFB                      | 0.170  | 1.125 | 4.694 | 0.543  |
| MAFF                      | 0.333  | 1.260 | 3.591 | 1.408  |
| MAFG-AS1                  | -0.053 | 0.964 | 2.482 | -0.162 |
| MAFIP                     | -0.448 | 0.733 | 4.370 | -1.287 |
| MAG                       | -1.163 | 0.447 | 8.093 | -2.134 |
| MAGED1                    | 0.381  | 1.302 | 7.210 | 1.461  |
| MAGEE1                    | 0.488  | 1.403 | 5.154 | 1.539  |
| MAGEE2                    | 0.649  | 1.568 | 3.504 | 1.535  |
| MAGEH1                    | 0.036  | 1.025 | 6.314 | 0.170  |
| MAGEL2                    | -0.137 | 0.909 | 2.578 | -0.558 |
| MAGI1//MAGI1-IT1          | 0.190  | 1.141 | 3.953 | 0.887  |
| MAGI2-AS3                 | -0.551 | 0.683 | 5.978 | -2.155 |
| MAGI2-IT1                 | -0.589 | 0.665 | 3.168 | -1.652 |
| MAGI3                     | 0.617  | 1.533 | 6.335 | 2.129  |
| MAGOH//MAGOHB             | 0.175  | 1.129 | 2.743 | 0.658  |
| MAGT1                     | -0.541 | 0.687 | 6.022 | -2.168 |
| MAK                       | 0.182  | 1.134 | 1.998 | 0.764  |
| MAL                       | -1.123 | 0.459 | 8.484 | -2.797 |
| MAL2                      | 1.754  | 3.374 | 3.710 | 2.912  |
| MALAT1                    | -0.309 | 0.807 | 9.692 | -1.334 |
| MALL                      | 0.246  | 1.186 | 3.534 | 0.765  |
| MAMDC2                    | 1.008  | 2.011 | 3.877 | 3.158  |
| MAMDC2-AS1//RP11-195E11.2 | -0.229 | 0.853 | 2.551 | -1.038 |
| MAMDC4                    | -0.427 | 0.744 | 3.012 | -1.665 |
| MAML2                     | -0.430 | 0.742 | 5.737 | -1.988 |
| MAN1A1                    | 0.427  | 1.344 | 5.924 | 1.200  |
| MAN1A2                    | 0.251  | 1.190 | 7.963 | 1.153  |
| MAN1B1-AS1                | -0.186 | 0.879 | 3.120 | -0.626 |
| MAN1C1                    | 0.135  | 1.098 | 6.306 | 0.413  |
| MAN2A1                    | -1.010 | 0.497 | 7.123 | -2.671 |
| MAN2B1                    | -0.418 | 0.749 | 4.842 | -1.503 |
| MANEAL                    | 0.106  | 1.076 | 4.100 | 0.481  |
| MANF                      | -0.037 | 0.975 | 4.560 | -0.142 |
| MANSC1                    | 0.443  | 1.360 | 5.317 | 2.019  |
| MAOB                      | 0.049  | 1.034 | 7.345 | 0.174  |
| MAP1A                     | 0.377  | 1.299 | 8.590 | 1.502  |
| MAP1LC3B2                 | -0.484 | 0.715 | 3.914 | -1.338 |

|          |        |       |       |        |
|----------|--------|-------|-------|--------|
| MAP2     | 0.867  | 1.823 | 8.295 | 2.060  |
| MAP2K1   | 0.781  | 1.718 | 7.753 | 2.763  |
| MAP2K4   | 0.656  | 1.575 | 4.312 | 2.347  |
| MAP2K6   | 0.042  | 1.029 | 5.618 | 0.172  |
| MAP3K10  | 0.656  | 1.575 | 5.550 | 2.366  |
| MAP3K11  | -0.716 | 0.609 | 4.132 | -2.608 |
| MAP3K14  | -0.159 | 0.895 | 3.923 | -0.663 |
| MAP3K6   | 0.527  | 1.441 | 4.602 | 2.283  |
| MAP3K8   | -0.590 | 0.664 | 4.665 | -1.100 |
| MAP3K8   | -0.130 | 0.914 | 4.799 | -0.313 |
| MAP3K9   | 1.039  | 2.055 | 4.495 | 2.515  |
| MAP4     | -0.446 | 0.734 | 7.361 | -2.166 |
| MAP4K1   | -0.359 | 0.780 | 2.341 | -1.370 |
| MAP4K2   | 0.432  | 1.349 | 4.840 | 1.671  |
| MAP4K4   | -0.704 | 0.614 | 8.473 | -2.547 |
| MAP4K5   | -0.636 | 0.643 | 7.647 | -2.591 |
| MAP6     | 0.441  | 1.358 | 6.469 | 1.593  |
| MAP6D1   | -0.712 | 0.611 | 5.625 | -2.657 |
| MAP7     | -0.798 | 0.575 | 8.246 | -2.909 |
| MAP7D2   | 1.084  | 2.120 | 6.614 | 1.446  |
| MAP7D3   | -0.154 | 0.899 | 5.011 | -0.703 |
| MAP9     | 0.724  | 1.652 | 5.534 | 2.571  |
| MAPK12   | 0.149  | 1.109 | 2.489 | 0.405  |
| MAPK13   | 0.857  | 1.811 | 3.765 | 2.710  |
| MAPK6    | 0.308  | 1.238 | 4.672 | 1.570  |
| MAPK7    | -0.305 | 0.810 | 2.705 | -1.165 |
| MAPK8    | 0.199  | 1.148 | 3.880 | 0.828  |
| MAPK8IP1 | 0.061  | 1.043 | 4.182 | 0.204  |
| MAPK8IP2 | 0.772  | 1.708 | 5.822 | 2.118  |
| MAPK9    | 0.562  | 1.476 | 6.000 | 2.320  |
| MAPKAPK2 | -0.536 | 0.690 | 6.424 | -2.460 |
| MAPKAPK3 | -0.047 | 0.968 | 4.912 | -0.208 |
| MAPRE3   | 0.580  | 1.495 | 4.850 | 2.196  |
| MAPT-IT1 | -0.296 | 0.815 | 3.730 | -1.044 |
| MARC2    | 0.739  | 1.669 | 5.526 | 3.261  |
| MARCH10  | -0.049 | 0.967 | 2.485 | -0.170 |
| MARCH11  | 0.548  | 1.462 | 2.998 | 1.722  |
| MARCH3   | -0.961 | 0.514 | 5.555 | -2.486 |
| MARCH4   | 0.726  | 1.654 | 4.003 | 1.663  |
| MARCKS   | -0.408 | 0.754 | 8.048 | -1.992 |
| MARCKSL1 | -0.331 | 0.795 | 6.776 | -1.351 |
| MARCO    | -0.141 | 0.907 | 2.585 | -0.516 |
| MARK1    | 0.551  | 1.466 | 5.831 | 2.097  |
| MARK4    | 0.499  | 1.413 | 5.738 | 2.180  |
| MAS1     | 1.899  | 3.730 | 2.850 | 2.925  |
| MASP1    | -0.316 | 0.803 | 5.154 | -0.893 |
| MAST1    | 0.727  | 1.655 | 5.544 | 1.633  |
| MAST3    | 0.644  | 1.563 | 7.377 | 2.198  |
| MAST4    | 0.678  | 1.600 | 4.551 | 2.539  |
| MASTL    | 0.429  | 1.346 | 4.000 | 1.461  |

|                     |        |       |       |        |
|---------------------|--------|-------|-------|--------|
| MAT2A               | -0.494 | 0.710 | 7.689 | -1.938 |
| MATK                | 0.804  | 1.746 | 4.032 | 2.699  |
| MATN1-AS1           | -0.189 | 0.877 | 2.750 | -0.660 |
| MATN2//LOC100506558 | -0.221 | 0.858 | 3.418 | -1.141 |
| MATN3               | 0.345  | 1.271 | 3.362 | 0.960  |
| MAVS                | -0.538 | 0.689 | 6.062 | -2.321 |
| MB21D1              | -0.213 | 0.863 | 2.335 | -0.756 |
| MB21D2              | 0.531  | 1.445 | 4.863 | 1.797  |
| MBD6                | -0.457 | 0.729 | 3.720 | -1.998 |
| MBLAC1              | 0.556  | 1.470 | 4.074 | 2.236  |
| MBLAC2              | 0.143  | 1.104 | 5.020 | 0.644  |
| MBNL3               | -0.681 | 0.624 | 3.753 | -1.834 |
| MBOAT1              | -1.718 | 0.304 | 5.089 | -3.110 |
| MBOAT7              | 0.353  | 1.277 | 5.169 | 1.657  |
| MBP                 | -0.352 | 0.783 | 6.846 | -1.526 |
| MBTPS1              | 0.084  | 1.060 | 5.914 | 0.431  |
| MBTPS2              | 0.302  | 1.233 | 6.865 | 1.101  |
| MC4R                | 0.957  | 1.941 | 2.780 | 2.238  |
| MCAM//MIR6756       | -0.049 | 0.967 | 3.767 | -0.141 |
| MCAT                | 0.099  | 1.071 | 4.790 | 0.317  |
| MCC                 | -0.221 | 0.858 | 5.576 | -0.920 |
| MCEMP1//C19orf59    | 0.000  | 1.000 | 2.344 | -0.001 |
| MCF2                | 0.446  | 1.362 | 4.552 | 1.171  |
| MCF2L2              | 0.728  | 1.656 | 6.130 | 2.598  |
| MCF2L-AS1           | 0.040  | 1.028 | 3.126 | 0.114  |
| MCHR1               | 0.731  | 1.659 | 3.948 | 2.223  |
| MCHR2               | 2.462  | 5.511 | 2.676 | 3.292  |
| MCL1                | -0.181 | 0.882 | 7.345 | -0.826 |
| MCM4                | 0.397  | 1.317 | 5.516 | 1.586  |
| MCM5                | -0.499 | 0.708 | 4.476 | -1.245 |
| MCM6                | 0.503  | 1.418 | 4.963 | 1.951  |
| MCM7                | -0.738 | 0.599 | 4.472 | -2.849 |
| MCM8                | -0.079 | 0.947 | 4.311 | -0.360 |
| MCTP1               | 1.160  | 2.235 | 5.141 | 3.135  |
| MCTP2               | 0.541  | 1.455 | 2.891 | 1.827  |
| MCU                 | 0.362  | 1.286 | 4.909 | 1.675  |
| MDFIC               | -0.406 | 0.755 | 3.093 | -1.526 |
| MDGA2               | 0.508  | 1.422 | 5.269 | 1.797  |
| MDH1                | 0.677  | 1.599 | 7.026 | 2.466  |
| MDH1B               | -0.244 | 0.845 | 3.315 | -0.820 |
| MDK                 | -0.404 | 0.756 | 4.695 | -1.610 |
| MDM1                | -0.218 | 0.860 | 3.989 | -0.743 |
| MDM4                | -0.462 | 0.726 | 6.325 | -2.020 |
| ME3                 | 0.588  | 1.503 | 5.300 | 2.186  |
| MEAF6               | 0.331  | 1.258 | 6.489 | 1.748  |
| MED12L              | 0.924  | 1.898 | 5.725 | 3.365  |
| MED15P9//MED15P2    | 0.101  | 1.072 | 2.732 | 0.377  |
| MED31               | 0.411  | 1.329 | 5.499 | 2.179  |
| MEDAG               | 0.158  | 1.116 | 3.128 | 0.305  |
| MEF2C               | 1.403  | 2.644 | 4.465 | 3.130  |



|                                    |        |       |       |        |
|------------------------------------|--------|-------|-------|--------|
| MEF2D                              | 0.411  | 1.330 | 6.691 | 1.798  |
| MEG3                               | 1.888  | 3.700 | 6.140 | 2.441  |
| MEG3                               | 0.677  | 1.598 | 5.176 | 2.128  |
| MEG8//SNORD112                     | 0.427  | 1.344 | 4.375 | 1.264  |
| MEGF10                             | -0.867 | 0.548 | 7.556 | -2.789 |
| MEIS1                              | -1.144 | 0.453 | 3.932 | -3.801 |
| MEIS3P1                            | 0.267  | 1.203 | 4.301 | 0.807  |
| MEOX2                              | -0.400 | 0.758 | 2.936 | -1.254 |
| MEPE                               | 1.433  | 2.701 | 2.116 | 2.467  |
| MESP2                              | 0.068  | 1.049 | 2.946 | 0.241  |
| MEST                               | 0.644  | 1.562 | 4.238 | 2.104  |
| MET                                | -0.479 | 0.718 | 4.879 | -1.183 |
| METAP1                             | 0.286  | 1.219 | 4.927 | 1.418  |
| METRN                              | -0.492 | 0.711 | 6.660 | -1.664 |
| METRNL                             | 0.405  | 1.324 | 4.238 | 1.354  |
| METTL1                             | 0.063  | 1.045 | 2.952 | 0.232  |
| METTL10//RP11-12J10.3              | 0.137  | 1.099 | 5.188 | 0.616  |
| METTL15                            | 0.007  | 1.005 | 3.958 | 0.027  |
| METTL16//LOC284009                 | -0.458 | 0.728 | 3.134 | -1.804 |
| METTL23                            | -0.276 | 0.826 | 4.634 | -1.092 |
| METTL25                            | 0.010  | 1.007 | 3.171 | 0.049  |
| METTL2A                            | 0.147  | 1.107 | 5.875 | 0.693  |
| METTL7A                            | -0.390 | 0.763 | 8.258 | -1.495 |
| METTL7B                            | 0.585  | 1.500 | 4.493 | 1.728  |
| MEX3B                              | 0.151  | 1.110 | 2.221 | 0.671  |
| MFAP3                              | 0.253  | 1.191 | 5.266 | 1.126  |
| MFAP3                              | -0.304 | 0.810 | 3.506 | -0.769 |
| MFAP3//PCNXL2//LOC101927169        | 1.041  | 2.057 | 4.101 | 3.091  |
| MFAP4                              | 0.527  | 1.441 | 4.561 | 1.738  |
| MFAP5                              | -0.162 | 0.894 | 2.609 | -0.472 |
| MFNG                               | 0.046  | 1.033 | 3.414 | 0.169  |
| MFSD2A                             | -0.185 | 0.880 | 4.262 | -0.684 |
| MFSD3                              | 0.237  | 1.178 | 3.761 | 0.980  |
| MFSD4                              | 1.073  | 2.104 | 5.998 | 2.193  |
| MFSD7                              | 0.119  | 1.086 | 3.630 | 0.476  |
| MFSD9                              | 0.054  | 1.038 | 3.494 | 0.214  |
| MGAT1//LOC102724833                | -0.139 | 0.908 | 4.671 | -0.648 |
| MGAT4A                             | 0.473  | 1.388 | 6.242 | 2.156  |
| MGAT4C                             | 0.261  | 1.199 | 4.486 | 0.903  |
| MGAT5B                             | 1.502  | 2.833 | 4.388 | 2.872  |
| MGC12916//RP11-214O1.2             | 0.081  | 1.058 | 2.496 | 0.256  |
| MGC16025                           | -0.381 | 0.768 | 2.867 | -1.082 |
| MGC16142                           | -0.583 | 0.667 | 2.730 | -2.042 |
| MGC16275//CTD-2514K5.2             | -0.691 | 0.619 | 4.706 | -1.724 |
| MGC24103                           | -0.460 | 0.727 | 2.037 | -1.286 |
| MGC27345//RBM28                    | -0.545 | 0.685 | 4.657 | -2.148 |
| MGC2889                            | 0.190  | 1.141 | 2.365 | 0.650  |
| MGC57346//CRHR1-IT1//AC126544.2//C | 0.278  | 1.212 | 5.033 | 1.271  |
| MGC70870                           | -0.958 | 0.515 | 4.620 | -2.010 |
| MGC72080                           | -0.349 | 0.785 | 5.932 | -1.288 |

|                                 |        |       |       |        |
|---------------------------------|--------|-------|-------|--------|
| MGLL                            | 0.545  | 1.459 | 3.855 | 2.247  |
| MGME1                           | -0.308 | 0.808 | 4.641 | -1.237 |
| MGP                             | 0.273  | 1.208 | 5.401 | 0.675  |
| MGST1                           | 0.020  | 1.014 | 5.003 | 0.087  |
| MGST3                           | 0.042  | 1.030 | 3.776 | 0.162  |
| MICA                            | 0.189  | 1.140 | 4.665 | 0.754  |
| MICA                            | 0.186  | 1.138 | 4.671 | 0.741  |
| MICAL2                          | 1.123  | 2.179 | 4.100 | 2.887  |
| MICALL1                         | -0.626 | 0.648 | 4.138 | -1.940 |
| MICALL2                         | 0.006  | 1.004 | 3.454 | 0.023  |
| MICU1                           | 0.164  | 1.121 | 6.104 | 0.851  |
| MICU3                           | 0.645  | 1.563 | 4.857 | 2.358  |
| MID1IP1                         | -0.717 | 0.609 | 6.898 | -2.743 |
| MIDN                            | 0.092  | 1.066 | 6.472 | 0.384  |
| MIF4GD                          | -0.408 | 0.753 | 4.721 | -1.522 |
| MINOS1P1                        | -0.266 | 0.832 | 2.926 | -0.733 |
| MIPEPP3                         | -0.158 | 0.896 | 2.480 | -0.577 |
| MIR106B                         | -0.273 | 0.828 | 2.550 | -1.013 |
| MIR1180                         | -0.883 | 0.542 | 2.675 | -2.547 |
| MIR1184-1//MIR1184-2//MIR1184-3 | 0.372  | 1.294 | 4.995 | 1.704  |
| MIR1200                         | -0.472 | 0.721 | 4.117 | -1.074 |
| MIR1208                         | -0.225 | 0.856 | 2.518 | -0.806 |
| MIR1226                         | 0.067  | 1.048 | 2.398 | 0.205  |
| MIR1227                         | 0.289  | 1.222 | 3.591 | 1.018  |
| MIR1229                         | -0.366 | 0.776 | 3.279 | -0.820 |
| MIR1231                         | -0.118 | 0.922 | 3.584 | -0.301 |
| MIR1238                         | -0.074 | 0.950 | 5.043 | -0.221 |
| MIR124-2HG//LINC00966           | 1.530  | 2.888 | 4.664 | 2.947  |
| MIR1243                         | -0.500 | 0.707 | 3.253 | -1.012 |
| MIR1250                         | -0.542 | 0.687 | 3.340 | -1.679 |
| MIR1254-1                       | -0.209 | 0.865 | 3.623 | -0.573 |
| MIR1260A                        | 0.348  | 1.273 | 2.433 | 1.039  |
| MIR127                          | 0.231  | 1.173 | 3.259 | 0.728  |
| MIR1270                         | 0.100  | 1.072 | 2.756 | 0.378  |
| MIR1282                         | -0.008 | 0.994 | 5.229 | -0.030 |
| MIR1290                         | 0.224  | 1.168 | 3.748 | 0.534  |
| MIR1299                         | -0.207 | 0.866 | 6.526 | -0.654 |
| MIR134                          | -0.032 | 0.978 | 3.054 | -0.103 |
| MIR137//MIR137HG//MIR2682       | 0.832  | 1.780 | 2.855 | 2.834  |
| MIR138-1                        | 0.003  | 1.002 | 2.350 | 0.010  |
| MIR139                          | 0.447  | 1.363 | 3.550 | 1.688  |
| MIR147A                         | 0.566  | 1.480 | 2.351 | 1.584  |
| MIR149                          | 0.142  | 1.103 | 2.458 | 0.390  |
| MIR151A                         | -0.654 | 0.636 | 2.996 | -1.552 |
| MIR151B                         | 0.051  | 1.036 | 3.046 | 0.179  |
| MIR1538                         | -0.361 | 0.779 | 3.808 | -1.533 |
| MIR1587                         | -0.187 | 0.879 | 2.323 | -0.357 |
| MIR181A1HG                      | -0.587 | 0.666 | 4.644 | -1.942 |
| MIR181B1                        | -0.300 | 0.812 | 2.538 | -0.679 |
| MIR181C                         | 0.162  | 1.119 | 2.893 | 0.564  |

|                                   |        |       |       |        |
|-----------------------------------|--------|-------|-------|--------|
| MIR185                            | -0.014 | 0.990 | 4.107 | -0.053 |
| MIR191                            | -0.253 | 0.839 | 2.312 | -0.831 |
| MIR1910                           | -0.028 | 0.981 | 4.004 | -0.109 |
| MIR1913                           | 0.157  | 1.115 | 3.760 | 0.539  |
| MIR197//GNAI3                     | 0.277  | 1.212 | 2.862 | 0.809  |
| MIR21//VMP1                       | 0.128  | 1.093 | 5.018 | 0.360  |
| MIR210HG                          | -0.287 | 0.819 | 2.935 | -0.694 |
| MIR219A2//MIR219B//RP11-339B21.12 | -0.546 | 0.685 | 4.903 | -1.045 |
| MIR219B                           | -0.559 | 0.679 | 2.945 | -1.667 |
| MIR2278                           | -0.233 | 0.851 | 2.320 | -0.862 |
| MIR22HG//MIR22                    | 0.624  | 1.541 | 3.173 | 2.627  |
| MIR23B//C9orf3//MIR24-1           | -0.270 | 0.830 | 2.936 | -0.770 |
| MIR23C                            | 0.718  | 1.645 | 1.682 | 2.811  |
| MIR25                             | 0.535  | 1.449 | 2.117 | 1.689  |
| MIR2682//MIR137HG//MIR137         | 0.364  | 1.287 | 2.256 | 1.234  |
| MIR27B//C9orf3//MIR24-1           | 0.146  | 1.106 | 2.103 | 0.355  |
| MIR29C//MIR29B2//C1orf132         | -0.103 | 0.931 | 3.336 | -0.267 |
| MIR3065                           | 0.243  | 1.183 | 2.700 | 0.865  |
| MIR3120                           | -0.575 | 0.671 | 3.931 | -1.410 |
| MIR3132                           | -0.430 | 0.742 | 2.960 | -1.656 |
| MIR3135B                          | -0.315 | 0.804 | 2.376 | -0.834 |
| MIR3137                           | 0.391  | 1.311 | 3.666 | 1.021  |
| MIR3139                           | -0.753 | 0.593 | 2.424 | -2.565 |
| MIR3143                           | 0.437  | 1.354 | 4.160 | 1.201  |
| MIR3147                           | 0.229  | 1.172 | 1.910 | 0.635  |
| MIR3151                           | 0.152  | 1.111 | 3.437 | 0.583  |
| MIR3155A//MIR3155B                | -0.146 | 0.904 | 2.764 | -0.427 |
| MIR3157                           | -0.208 | 0.866 | 2.932 | -0.585 |
| MIR3161                           | -0.191 | 0.876 | 2.874 | -0.697 |
| MIR3175                           | -0.279 | 0.824 | 4.487 | -1.088 |
| MIR3180-4                         | 0.143  | 1.104 | 3.509 | 0.532  |
| MIR3180-4//MIR3180-5              | -0.119 | 0.921 | 2.617 | -0.335 |
| MIR3192                           | 0.060  | 1.043 | 3.357 | 0.196  |
| MIR3198-1                         | 0.030  | 1.021 | 3.208 | 0.110  |
| MIR31HG                           | 0.876  | 1.835 | 2.609 | 2.391  |
| MIR32                             | 0.560  | 1.475 | 2.766 | 1.935  |
| MIR324                            | -0.124 | 0.917 | 3.473 | -0.430 |
| MIR326                            | -0.677 | 0.626 | 3.994 | -2.343 |
| MIR338//MIR3065                   | -0.388 | 0.764 | 3.488 | -1.270 |
| MIR339                            | -0.206 | 0.867 | 4.006 | -0.653 |
| MIR33B                            | 0.401  | 1.320 | 3.367 | 1.049  |
| MIR3619                           | 0.050  | 1.036 | 4.682 | 0.157  |
| MIR3622A                          | 0.641  | 1.559 | 2.454 | 2.101  |
| MIR3622B//MIR3622A                | -0.565 | 0.676 | 3.004 | -1.503 |
| MIR3650                           | 0.039  | 1.028 | 3.636 | 0.123  |
| MIR3661                           | 0.445  | 1.362 | 3.984 | 1.892  |
| MIR3662                           | -0.069 | 0.953 | 2.781 | -0.195 |
| MIR3667                           | -0.472 | 0.721 | 3.215 | -1.761 |
| MIR3671                           | -0.405 | 0.755 | 2.147 | -1.300 |
| MIR3689A                          | 0.133  | 1.096 | 3.485 | 0.419  |

|                                   |        |       |       |        |
|-----------------------------------|--------|-------|-------|--------|
| MIR3689B                          | -0.345 | 0.787 | 2.442 | -1.217 |
| MIR3689F                          | 0.047  | 1.033 | 5.855 | 0.174  |
| MIR3691                           | -0.243 | 0.845 | 2.323 | -0.800 |
| MIR370                            | 0.156  | 1.114 | 1.906 | 0.607  |
| MIR375                            | -0.004 | 0.997 | 3.901 | -0.015 |
| MIR378E                           | -0.296 | 0.815 | 2.671 | -0.965 |
| MIR378I                           | -0.349 | 0.785 | 3.631 | -1.042 |
| MIR3916//RP11-488L18.4            | -0.599 | 0.660 | 5.051 | -1.419 |
| MIR3936                           | -0.147 | 0.903 | 4.078 | -0.475 |
| MIR3939                           | 0.958  | 1.943 | 2.879 | 2.133  |
| MIR3942                           | -0.495 | 0.710 | 2.312 | -1.505 |
| MIR3944                           | 0.036  | 1.025 | 3.184 | 0.143  |
| MIR3972                           | 0.109  | 1.078 | 2.412 | 0.384  |
| MIR3978                           | 0.441  | 1.357 | 3.776 | 1.370  |
| MIR412                            | -0.028 | 0.980 | 2.116 | -0.102 |
| MIR421                            | -0.110 | 0.927 | 5.320 | -0.338 |
| MIR4288                           | 0.191  | 1.142 | 3.262 | 0.626  |
| MIR4292                           | -0.029 | 0.980 | 2.390 | -0.072 |
| MIR4294                           | -0.426 | 0.744 | 2.584 | -0.942 |
| MIR4295                           | -0.428 | 0.743 | 2.864 | -1.346 |
| MIR4300                           | -0.407 | 0.754 | 2.219 | -0.904 |
| MIR4312                           | -0.458 | 0.728 | 2.911 | -1.491 |
| MIR4314                           | -0.297 | 0.814 | 2.503 | -1.108 |
| MIR4316                           | -0.048 | 0.967 | 3.722 | -0.144 |
| MIR4324                           | 0.324  | 1.252 | 3.689 | 0.867  |
| MIR4420                           | -0.176 | 0.885 | 2.038 | -0.598 |
| MIR4441                           | -0.216 | 0.861 | 4.812 | -0.662 |
| MIR4450                           | -1.017 | 0.494 | 4.678 | -1.949 |
| MIR4451                           | -1.118 | 0.461 | 3.167 | -2.401 |
| MIR4454                           | 0.239  | 1.180 | 6.165 | 0.796  |
| MIR4461                           | -0.437 | 0.739 | 6.289 | -1.059 |
| MIR4476                           | -0.464 | 0.725 | 2.866 | -1.404 |
| MIR4481                           | -0.328 | 0.797 | 4.105 | -1.192 |
| MIR4482                           | -0.337 | 0.791 | 3.083 | -1.289 |
| MIR4486                           | -0.207 | 0.866 | 2.542 | -0.660 |
| MIR4492                           | 0.187  | 1.138 | 3.884 | 0.656  |
| MIR4497                           | -0.106 | 0.929 | 2.867 | -0.295 |
| MIR4500                           | 1.138  | 2.201 | 2.562 | 2.842  |
| MIR4500HG                         | 0.760  | 1.694 | 2.581 | 2.183  |
| MIR4502                           | 0.417  | 1.335 | 2.613 | 1.235  |
| MIR4516//LOC102724992//LOC1019274 | 0.127  | 1.092 | 3.937 | 0.326  |
| MIR4518                           | -0.105 | 0.930 | 3.207 | -0.235 |
| MIR4519                           | 0.691  | 1.615 | 3.351 | 1.607  |
| MIR4522                           | 0.072  | 1.051 | 2.324 | 0.186  |
| MIR4525                           | -0.354 | 0.783 | 6.348 | -1.340 |
| MIR4530                           | 0.365  | 1.288 | 2.930 | 0.680  |
| MIR4533                           | -0.062 | 0.958 | 4.825 | -0.247 |
| MIR4534                           | -0.604 | 0.658 | 6.730 | -1.749 |
| MIR4638                           | -0.589 | 0.665 | 3.154 | -2.220 |
| MIR4644                           | -0.498 | 0.708 | 3.463 | -1.322 |

|                              |        |       |       |        |
|------------------------------|--------|-------|-------|--------|
| MIR4646                      | -0.003 | 0.998 | 2.752 | -0.007 |
| MIR4655                      | 0.020  | 1.014 | 2.235 | 0.064  |
| MIR4663                      | -0.219 | 0.859 | 2.679 | -0.638 |
| MIR4668                      | -0.240 | 0.847 | 1.924 | -0.652 |
| MIR4673                      | -0.156 | 0.898 | 4.829 | -0.643 |
| MIR4677                      | -0.457 | 0.729 | 4.228 | -1.363 |
| MIR4686                      | -0.145 | 0.905 | 3.053 | -0.485 |
| MIR4689                      | -0.210 | 0.865 | 2.797 | -0.619 |
| MIR4697HG//MIR4697           | 0.575  | 1.490 | 4.215 | 1.921  |
| MIR4705                      | 1.106  | 2.152 | 1.506 | 2.914  |
| MIR4710                      | -0.651 | 0.637 | 2.711 | -1.874 |
| MIR4730                      | -0.015 | 0.989 | 3.502 | -0.037 |
| MIR4742                      | -0.221 | 0.858 | 3.332 | -0.451 |
| MIR4746                      | -0.270 | 0.829 | 2.623 | -0.632 |
| MIR4748                      | 0.168  | 1.124 | 3.998 | 0.643  |
| MIR4756                      | -0.072 | 0.951 | 3.492 | -0.202 |
| MIR4757                      | -0.661 | 0.633 | 2.273 | -2.742 |
| MIR4780                      | -0.178 | 0.884 | 2.391 | -0.545 |
| MIR486-1                     | 0.164  | 1.120 | 2.687 | 0.578  |
| MIR502                       | 0.305  | 1.235 | 3.115 | 1.105  |
| MIR513A2                     | 0.035  | 1.025 | 3.052 | 0.085  |
| MIR516B1                     | 0.524  | 1.438 | 2.245 | 1.581  |
| MIR539                       | 0.005  | 1.004 | 4.292 | 0.021  |
| MIR548AL                     | 0.335  | 1.262 | 2.713 | 1.328  |
| MIR548F2                     | 0.025  | 1.018 | 3.029 | 0.089  |
| MIR548H2                     | 0.330  | 1.257 | 3.657 | 1.079  |
| MIR548I2                     | -0.627 | 0.648 | 2.955 | -1.294 |
| MIR548I2//MIR548I1//MIR548I3 | -0.457 | 0.729 | 3.379 | -1.074 |
| MIR548I2//MIR548I1//MIR548I3 | -0.284 | 0.822 | 3.336 | -0.703 |
| MIR548L                      | -0.004 | 0.997 | 2.473 | -0.012 |
| MIR548V                      | -1.328 | 0.398 | 5.193 | -2.695 |
| MIR550A1//MIR550B1           | -0.041 | 0.972 | 2.669 | -0.143 |
| MIR550A3                     | 0.011  | 1.008 | 3.110 | 0.030  |
| MIR552                       | -0.345 | 0.787 | 2.265 | -1.226 |
| MIR570                       | -0.473 | 0.721 | 6.440 | -1.377 |
| MIR571                       | -0.330 | 0.795 | 3.848 | -1.246 |
| MIR573                       | -0.246 | 0.843 | 2.532 | -0.884 |
| MIR574                       | -0.183 | 0.881 | 5.026 | -0.725 |
| MIR575                       | -1.056 | 0.481 | 5.244 | -2.828 |
| MIR577                       | -0.948 | 0.518 | 2.431 | -2.199 |
| MIR579                       | -0.261 | 0.835 | 4.046 | -0.634 |
| MIR585                       | 0.396  | 1.316 | 2.183 | 1.594  |
| MIR587                       | 0.142  | 1.103 | 2.868 | 0.471  |
| MIR597                       | -0.159 | 0.895 | 3.972 | -0.586 |
| MIR600HG//MIR600             | 0.745  | 1.676 | 4.799 | 2.078  |
| MIR601                       | -0.786 | 0.580 | 2.784 | -2.331 |
| MIR604                       | -0.110 | 0.927 | 3.453 | -0.286 |
| MIR606                       | 0.181  | 1.134 | 3.354 | 0.532  |
| MIR628                       | 0.750  | 1.682 | 2.440 | 2.115  |
| MIR637//DAPK3                | -0.286 | 0.820 | 3.651 | -0.636 |

|                                    |        |       |       |        |
|------------------------------------|--------|-------|-------|--------|
| MIR642A//MIR642B                   | 0.325  | 1.252 | 2.639 | 0.952  |
| MIR644A                            | -0.517 | 0.699 | 4.301 | -1.201 |
| MIR645                             | 0.102  | 1.073 | 3.723 | 0.279  |
| MIR646                             | -0.654 | 0.635 | 3.056 | -2.092 |
| MIR647                             | -0.336 | 0.792 | 4.935 | -1.382 |
| MIR648                             | -0.144 | 0.905 | 2.248 | -0.405 |
| MIR654                             | 0.716  | 1.643 | 2.020 | 1.795  |
| MIR657                             | -0.310 | 0.807 | 3.076 | -0.850 |
| MIR662                             | 0.348  | 1.273 | 2.637 | 1.225  |
| MIR663B                            | -0.010 | 0.993 | 4.296 | -0.033 |
| MIR6735//SZT2-AS1                  | -0.131 | 0.913 | 2.623 | -0.458 |
| MIR7-3HG                           | 0.967  | 1.954 | 4.109 | 2.054  |
| MIR744                             | -0.412 | 0.752 | 2.824 | -1.422 |
| MIR760                             | 0.404  | 1.323 | 3.429 | 1.494  |
| MIR7641-2                          | -0.198 | 0.872 | 2.171 | -0.587 |
| MIR765                             | -0.460 | 0.727 | 2.369 | -1.799 |
| MIR770//MEG3                       | 1.165  | 2.242 | 4.197 | 1.977  |
| MIR877                             | -0.301 | 0.812 | 2.924 | -0.726 |
| MIR877                             | -0.227 | 0.854 | 3.230 | -0.623 |
| MIR92B                             | -0.153 | 0.899 | 4.261 | -0.535 |
| MIR9-3                             | 0.624  | 1.541 | 2.129 | 1.613  |
| MIR941-1//DNAJC5//MIR941-4         | -0.393 | 0.762 | 5.444 | -1.576 |
| MIR941-1//MIR941-2//MIR941-3//MIRS | -0.282 | 0.823 | 4.188 | -1.074 |
| MIRLET7A1                          | 0.327  | 1.255 | 2.284 | 0.785  |
| MIRLET7D                           | -0.189 | 0.877 | 2.352 | -0.704 |
| MITF                               | -0.514 | 0.700 | 2.940 | -1.998 |
| MKKS                               | 0.424  | 1.342 | 6.194 | 2.153  |
| MKL2                               | 1.388  | 2.618 | 8.113 | 2.948  |
| MKNK2                              | -0.370 | 0.774 | 5.496 | -1.034 |
| MKRN2                              | 0.274  | 1.209 | 6.354 | 1.412  |
| MKRN3                              | -0.541 | 0.687 | 3.419 | -1.747 |
| MKX                                | 0.397  | 1.317 | 4.186 | 1.393  |
| MLC1                               | -0.195 | 0.874 | 8.797 | -0.950 |
| MLIP                               | 1.179  | 2.264 | 3.438 | 2.025  |
| MLKL                               | 0.000  | 1.000 | 4.635 | 0.001  |
| MLLT11                             | 0.937  | 1.915 | 8.193 | 2.288  |
| MLLT3                              | 0.360  | 1.284 | 5.838 | 1.752  |
| MLXIPL                             | 0.156  | 1.114 | 3.732 | 0.558  |
| MMAA                               | 0.344  | 1.269 | 4.035 | 1.658  |
| MMAB                               | -0.269 | 0.830 | 5.751 | -1.123 |
| MMD                                | 0.612  | 1.528 | 7.006 | 2.115  |
| MMD2                               | -0.290 | 0.818 | 5.289 | -0.894 |
| MME                                | 0.093  | 1.067 | 2.683 | 0.195  |
| MMEL1                              | 0.174  | 1.129 | 3.344 | 0.796  |
| MMP14                              | -0.523 | 0.696 | 4.859 | -1.194 |
| MMP16                              | 0.608  | 1.524 | 5.975 | 2.309  |
| MMP17                              | 0.420  | 1.338 | 3.748 | 1.521  |
| MMP2                               | -0.600 | 0.660 | 4.464 | -1.992 |
| MMP24                              | 0.951  | 1.933 | 4.156 | 2.137  |
| MMP24-AS1                          | -0.562 | 0.677 | 2.197 | -1.863 |

|                                |        |       |       |        |
|--------------------------------|--------|-------|-------|--------|
| MMP24-AS1//EDEM2//RP4-614O4.11 | -0.921 | 0.528 | 5.211 | -3.567 |
| MMP28                          | -0.076 | 0.949 | 3.027 | -0.261 |
| MMP8                           | -0.935 | 0.523 | 2.580 | -1.692 |
| MMRN1                          | -0.151 | 0.901 | 2.707 | -0.395 |
| MMS22L                         | -0.327 | 0.797 | 2.607 | -1.250 |
| MN1                            | 0.169  | 1.124 | 4.439 | 0.548  |
| MNDA                           | -0.095 | 0.936 | 4.080 | -0.281 |
| MNS1                           | 0.345  | 1.270 | 5.072 | 1.288  |
| MOAP1                          | 0.609  | 1.526 | 6.370 | 1.965  |
| MOB3A                          | -0.512 | 0.701 | 7.466 | -2.409 |
| MOB3B                          | -1.199 | 0.436 | 7.565 | -3.371 |
| MOB3B                          | -0.579 | 0.669 | 2.726 | -1.812 |
| MOBP                           | -1.355 | 0.391 | 8.161 | -2.673 |
| MOCS2                          | 0.184  | 1.136 | 8.190 | 0.961  |
| MOCS3                          | 0.478  | 1.393 | 3.490 | 1.523  |
| MOG                            | -1.082 | 0.472 | 8.090 | -2.092 |
| MOG                            | -1.092 | 0.469 | 8.141 | -2.091 |
| MOGS                           | -0.046 | 0.969 | 3.911 | -0.168 |
| MOK                            | 0.186  | 1.137 | 2.927 | 0.650  |
| MORC3                          | 0.191  | 1.141 | 4.495 | 0.778  |
| MORC4                          | -0.500 | 0.707 | 4.567 | -1.804 |
| MORN1                          | 0.717  | 1.643 | 3.534 | 2.935  |
| MORN3                          | 0.810  | 1.753 | 2.939 | 2.992  |
| MORN4                          | 0.651  | 1.570 | 4.227 | 2.069  |
| MOSPD1                         | 0.175  | 1.129 | 4.301 | 0.585  |
| MOSPD2                         | -0.800 | 0.574 | 5.905 | -2.443 |
| MOXD1                          | 1.384  | 2.609 | 4.200 | 2.516  |
| MPC2                           | 0.451  | 1.367 | 7.186 | 1.851  |
| MPEG1                          | -0.401 | 0.757 | 4.572 | -1.103 |
| MPLKIP                         | 0.035  | 1.025 | 4.721 | 0.171  |
| MPP3                           | -0.034 | 0.977 | 4.286 | -0.125 |
| MPP6                           | 0.394  | 1.314 | 7.310 | 1.617  |
| MPP7                           | 0.909  | 1.878 | 3.754 | 2.507  |
| MPPED1                         | 1.553  | 2.934 | 4.697 | 2.657  |
| MPPED2                         | -0.111 | 0.926 | 3.749 | -0.364 |
| MPRIP-AS1                      | -0.143 | 0.906 | 2.643 | -0.545 |
| MPZ                            | -0.273 | 0.828 | 4.068 | -0.400 |
| MPZL2                          | 0.459  | 1.374 | 3.267 | 1.306  |
| MR1                            | 0.157  | 1.115 | 3.938 | 0.683  |
| MRAP2                          | 0.945  | 1.925 | 4.422 | 1.975  |
| MRC1                           | 0.669  | 1.590 | 4.473 | 1.557  |
| MRC1                           | 0.658  | 1.577 | 4.205 | 1.505  |
| MRC2                           | -0.684 | 0.623 | 4.262 | -2.343 |
| MREG                           | 0.314  | 1.243 | 3.780 | 1.165  |
| MRFAP1L1                       | 0.293  | 1.225 | 6.983 | 1.405  |
| MRGBP                          | -0.106 | 0.929 | 4.069 | -0.418 |
| MRGPRE                         | -0.037 | 0.975 | 3.484 | -0.140 |
| MRI1                           | 0.012  | 1.008 | 4.991 | 0.041  |
| MRO                            | -0.346 | 0.787 | 6.608 | -1.239 |
| MRPL1                          | 0.225  | 1.169 | 3.866 | 0.925  |

|                                   |        |       |       |        |
|-----------------------------------|--------|-------|-------|--------|
| MRPL15                            | 0.395  | 1.315 | 6.263 | 1.765  |
| MRPL30//LOC101927110//RP11-111H1: | 0.268  | 1.204 | 6.064 | 1.416  |
| MRPL30//LOC101927110//RP11-111H1: | 0.001  | 1.001 | 5.297 | 0.004  |
| MRPL35                            | 0.347  | 1.272 | 6.210 | 1.451  |
| MRPL42                            | 0.434  | 1.351 | 4.573 | 1.900  |
| MRPL45                            | 0.452  | 1.368 | 6.234 | 2.335  |
| MRPL46//RP11-97O12.7              | 0.066  | 1.047 | 5.725 | 0.321  |
| MRPL50                            | 0.237  | 1.178 | 6.363 | 0.944  |
| MRPS12                            | -0.071 | 0.952 | 3.663 | -0.307 |
| MRPS17//RP11-15K19.2              | 0.005  | 1.003 | 4.894 | 0.023  |
| MRPS21                            | 0.358  | 1.281 | 9.556 | 1.781  |
| MRPS30                            | 0.590  | 1.505 | 6.551 | 2.756  |
| MRPS31P5                          | -0.533 | 0.691 | 4.104 | -1.992 |
| MRPS36                            | 0.320  | 1.248 | 2.647 | 1.351  |
| MRRF                              | -0.053 | 0.964 | 4.367 | -0.173 |
| MRS2                              | 0.401  | 1.320 | 5.533 | 1.848  |
| MRTO4                             | 0.353  | 1.277 | 4.937 | 1.455  |
| MRVI1                             | 0.061  | 1.043 | 6.954 | 0.250  |
| MS4A14                            | -0.328 | 0.796 | 3.430 | -0.769 |
| MS4A4A                            | 0.275  | 1.210 | 3.089 | 0.705  |
| MS4A6A                            | -0.030 | 0.979 | 3.790 | -0.082 |
| MS4A7                             | 0.048  | 1.034 | 5.267 | 0.110  |
| MSANTD4                           | 0.155  | 1.113 | 5.601 | 0.824  |
| MSH2                              | 0.373  | 1.295 | 5.891 | 1.675  |
| MSH5//MSH5-SAPCD1//SAPCD1         | -0.298 | 0.814 | 3.274 | -1.207 |
| MSH5//MSH5-SAPCD1//SAPCD1         | -0.247 | 0.843 | 4.086 | -0.910 |
| MSI2                              | -0.395 | 0.761 | 7.352 | -1.596 |
| MSLN                              | -0.080 | 0.946 | 2.695 | -0.244 |
| MSMO1                             | 0.203  | 1.151 | 7.149 | 0.641  |
| MSN                               | -0.378 | 0.769 | 9.050 | -1.288 |
| MSR1                              | 0.122  | 1.088 | 2.492 | 0.454  |
| MSRA                              | 0.498  | 1.412 | 3.763 | 1.450  |
| MST1L                             | 0.436  | 1.353 | 2.540 | 1.765  |
| MSTN                              | 0.391  | 1.311 | 2.531 | 1.012  |
| MSX1                              | -0.142 | 0.907 | 3.136 | -0.537 |
| MT1A                              | 1.021  | 2.029 | 4.342 | 1.529  |
| MT1CP                             | -0.064 | 0.956 | 6.753 | -0.238 |
| MT1E                              | -0.313 | 0.805 | 4.804 | -0.504 |
| MT1F                              | -0.333 | 0.794 | 6.892 | -0.626 |
| MT1G                              | -0.001 | 0.999 | 5.649 | -0.002 |
| MT1JP                             | 0.037  | 1.026 | 2.633 | 0.081  |
| MT1L//NUTF2//MT1M                 | 0.691  | 1.614 | 3.777 | 1.804  |
| MT1M                              | 0.439  | 1.355 | 7.883 | 1.265  |
| MT1X                              | 0.094  | 1.067 | 9.610 | 0.307  |
| MT2A                              | 0.058  | 1.041 | 6.779 | 0.217  |
| MTA3                              | 0.520  | 1.434 | 3.841 | 2.193  |
| MTCL1//SOGA2                      | 0.209  | 1.156 | 4.421 | 0.999  |
| MTERF1//MTERF                     | -0.024 | 0.983 | 3.979 | -0.090 |
| MTFMT                             | 0.313  | 1.243 | 4.428 | 1.365  |
| MTFP1//RP4-539M6.19               | 0.139  | 1.101 | 3.313 | 0.344  |



|                       |        |       |        |        |
|-----------------------|--------|-------|--------|--------|
| MTHFD1//CTD-2555O16.4 | -0.224 | 0.856 | 3.320  | -0.796 |
| MTHFD2                | -0.471 | 0.721 | 4.689  | -1.437 |
| MTHFSD                | -0.241 | 0.846 | 3.984  | -0.893 |
| MTMR10                | -0.727 | 0.604 | 8.709  | -2.103 |
| MTMR11                | -0.251 | 0.840 | 4.592  | -0.845 |
| MTMR12                | 0.308  | 1.238 | 6.442  | 1.580  |
| MTMR4                 | 0.149  | 1.109 | 7.135  | 0.813  |
| MTMR6                 | -0.064 | 0.957 | 6.483  | -0.303 |
| MTMR7                 | 0.029  | 1.020 | 5.930  | 0.107  |
| MTMR9                 | 0.391  | 1.311 | 5.306  | 1.843  |
| MTMR9LP               | -0.621 | 0.650 | 3.252  | -2.083 |
| MTO1                  | -0.140 | 0.908 | 4.387  | -0.661 |
| MTPAP                 | 0.438  | 1.355 | 6.112  | 2.275  |
| MTPN                  | 0.628  | 1.546 | 4.111  | 2.668  |
| MTRNR2L2              | -0.255 | 0.838 | 3.826  | -0.739 |
| MTRNR2L8//MIR4485     | -0.160 | 0.895 | 6.693  | -0.612 |
| MTSS1                 | -0.555 | 0.681 | 6.509  | -2.183 |
| MTSS1L                | -0.240 | 0.847 | 7.979  | -1.124 |
| MT-TA                 | 0.003  | 1.002 | 10.177 | 0.010  |
| MT-TD                 | -0.674 | 0.627 | 3.118  | -1.075 |
| MT-TG                 | 0.602  | 1.518 | 6.800  | 1.127  |
| MT-TH                 | -0.011 | 0.992 | 7.912  | -0.033 |
| MT-TI                 | 0.024  | 1.017 | 5.115  | 0.037  |
| MT-TL2                | -0.063 | 0.957 | 6.515  | -0.147 |
| MT-TM                 | -0.176 | 0.885 | 9.248  | -0.510 |
| MT-TN                 | 0.162  | 1.119 | 8.010  | 0.419  |
| MT-TP                 | -0.014 | 0.990 | 3.842  | -0.037 |
| MT-TQ                 | 0.153  | 1.112 | 8.604  | 0.385  |
| MT-TR                 | 0.162  | 1.119 | 6.044  | 0.310  |
| MT-TS1//UIMC1         | -0.040 | 0.972 | 7.823  | -0.118 |
| MT-TS2                | 0.095  | 1.068 | 9.637  | 0.316  |
| MT-TT                 | 0.641  | 1.559 | 3.760  | 1.533  |
| MT-TW                 | -0.070 | 0.952 | 4.821  | -0.210 |
| MTUS1                 | -0.872 | 0.546 | 5.525  | -2.968 |
| MTUS2                 | 0.879  | 1.839 | 3.929  | 1.966  |
| MTX3                  | 0.450  | 1.366 | 6.037  | 1.788  |
| MUC1                  | 0.245  | 1.185 | 3.607  | 1.020  |
| MUC20                 | 0.095  | 1.068 | 3.389  | 0.274  |
| MUM1L1                | 1.050  | 2.071 | 3.662  | 1.882  |
| MURC                  | -0.526 | 0.694 | 3.831  | -1.919 |
| MVB12B                | -1.003 | 0.499 | 6.693  | -3.027 |
| MVD                   | -0.114 | 0.924 | 5.388  | -0.406 |
| MVK                   | -0.510 | 0.702 | 4.233  | -1.604 |
| MVP                   | -0.232 | 0.852 | 5.722  | -0.586 |
| MX2                   | -0.096 | 0.935 | 3.273  | -0.304 |
| MXD1                  | 0.040  | 1.028 | 6.176  | 0.124  |
| MXRA7                 | 0.571  | 1.485 | 6.017  | 1.887  |
| MXRA8                 | -0.132 | 0.913 | 4.810  | -0.461 |
| MYBPC1                | 0.445  | 1.362 | 2.657  | 1.756  |
| MYBPH                 | 0.362  | 1.285 | 2.348  | 1.199  |

|                     |        |       |       |        |
|---------------------|--------|-------|-------|--------|
| MYC                 | 0.221  | 1.165 | 3.297 | 0.728  |
| MYCBP2              | 0.585  | 1.500 | 7.914 | 2.401  |
| MYCN                | -0.546 | 0.685 | 3.947 | -1.948 |
| MYD88               | 0.294  | 1.226 | 3.317 | 1.148  |
| MYH10               | 0.731  | 1.659 | 6.663 | 2.093  |
| MYH11               | 0.467  | 1.383 | 5.811 | 1.108  |
| MYH14               | -0.588 | 0.665 | 5.096 | -2.383 |
| MYL12A              | 0.022  | 1.015 | 3.852 | 0.084  |
| MYL3                | -0.169 | 0.890 | 3.265 | -0.477 |
| MYL5                | 0.032  | 1.022 | 3.103 | 0.115  |
| MYL9                | 0.294  | 1.226 | 6.421 | 0.714  |
| MYLIP               | -0.165 | 0.892 | 5.375 | -0.753 |
| MYLK                | -0.620 | 0.651 | 5.173 | -1.977 |
| MYLK3               | 0.181  | 1.134 | 3.176 | 0.535  |
| MYLK4               | -0.053 | 0.964 | 3.080 | -0.149 |
| MYO15B              | -0.623 | 0.649 | 4.379 | -2.146 |
| MYO16               | 0.662  | 1.582 | 4.765 | 2.263  |
| MYO1A               | -0.419 | 0.748 | 4.032 | -0.701 |
| MYO1B               | 0.547  | 1.462 | 5.252 | 1.484  |
| MYO1C               | 0.071  | 1.050 | 5.678 | 0.309  |
| MYO1D               | -1.091 | 0.469 | 6.730 | -2.522 |
| MYO1E               | -0.864 | 0.549 | 6.643 | -2.612 |
| MYO1F               | -0.591 | 0.664 | 5.236 | -1.703 |
| MYO1G               | -0.083 | 0.944 | 3.129 | -0.157 |
| MYO5A               | 0.731  | 1.660 | 8.324 | 2.729  |
| MYO5B               | 0.518  | 1.432 | 3.737 | 1.672  |
| MYO5C               | -0.360 | 0.779 | 4.747 | -1.042 |
| MYO9A               | 0.363  | 1.286 | 7.145 | 1.978  |
| MYO9B               | -0.893 | 0.539 | 7.282 | -2.917 |
| MYOF                | -0.287 | 0.820 | 5.798 | -0.810 |
| MYOM1               | -0.945 | 0.519 | 4.940 | -3.091 |
| MYOM2               | 0.792  | 1.731 | 3.626 | 2.269  |
| MYOZ1               | -0.470 | 0.722 | 2.734 | -1.768 |
| MYPOP               | 0.535  | 1.448 | 3.615 | 1.849  |
| MYRF                | -1.212 | 0.432 | 6.428 | -3.271 |
| MYRIP               | 0.839  | 1.789 | 5.215 | 2.926  |
| MYSM1               | 0.288  | 1.221 | 6.714 | 1.470  |
| MYT1L               | 1.526  | 2.879 | 6.029 | 2.617  |
| MZT1                | 0.687  | 1.610 | 3.964 | 2.567  |
| N4BP2L1             | 0.556  | 1.470 | 5.140 | 2.173  |
| N4BP2L2-IT2         | -0.474 | 0.720 | 6.105 | -1.448 |
| N4BP3//RP11-889L3.3 | 0.366  | 1.289 | 2.570 | 0.861  |
| NAA30               | 0.363  | 1.286 | 6.080 | 1.706  |
| NAALAD2             | 0.347  | 1.272 | 3.720 | 1.180  |
| NABP1               | -0.173 | 0.887 | 3.740 | -0.672 |
| NACA                | -0.288 | 0.819 | 3.889 | -1.188 |
| NACAD               | -0.701 | 0.615 | 5.983 | -2.322 |
| NACC1               | -0.151 | 0.901 | 3.740 | -0.445 |
| NACC2               | -0.335 | 0.793 | 7.157 | -1.435 |
| NAF1                | 0.429  | 1.346 | 5.036 | 2.083  |

|                                   |        |       |       |        |
|-----------------------------------|--------|-------|-------|--------|
| NAG20                             | 0.330  | 1.257 | 3.033 | 0.952  |
| NAGA                              | -0.037 | 0.975 | 5.487 | -0.146 |
| NAGLU//RP11-400F19.8              | -0.351 | 0.784 | 4.700 | -1.436 |
| NAGPA                             | 0.867  | 1.823 | 4.966 | 3.098  |
| NAIP//RP11-1319K7.1               | -0.427 | 0.744 | 6.497 | -1.159 |
| NAMPT//NAMPTL                     | 0.686  | 1.609 | 8.312 | 1.596  |
| NAP1L2                            | 1.059  | 2.084 | 7.003 | 2.568  |
| NAP1L3                            | 0.514  | 1.428 | 7.160 | 1.671  |
| NAP1L5                            | 0.795  | 1.735 | 7.618 | 2.142  |
| NAPA-AS1                          | -0.319 | 0.801 | 3.916 | -1.265 |
| NAPB                              | 1.137  | 2.199 | 7.547 | 2.127  |
| NAPEPLD                           | 0.255  | 1.193 | 6.461 | 1.199  |
| NAPG                              | 0.495  | 1.410 | 7.864 | 2.313  |
| NAPSB                             | -0.354 | 0.782 | 4.046 | -0.603 |
| NASP                              | -0.530 | 0.692 | 5.823 | -2.053 |
| NAT14                             | 0.462  | 1.378 | 4.124 | 1.742  |
| NAT8L                             | 0.411  | 1.330 | 7.254 | 1.459  |
| NAV2                              | -0.531 | 0.692 | 6.815 | -1.974 |
| NAV2//RP1-34H18.1                 | 0.357  | 1.280 | 4.350 | 1.156  |
| NAV2-AS1                          | -0.100 | 0.933 | 2.984 | -0.369 |
| NAV2-AS2                          | -0.279 | 0.824 | 3.245 | -1.095 |
| NAV2-IT1                          | -0.723 | 0.606 | 2.470 | -2.393 |
| NBEA                              | 0.820  | 1.765 | 7.125 | 2.290  |
| NBPF1//NBPF11//NBPF15             | -0.574 | 0.672 | 5.881 | -1.981 |
| NBPF11//NBPF12//NBPF10//NBPF9//NE | -0.401 | 0.758 | 7.889 | -1.951 |
| NBPF11//NBPF12//NBPF15//NBPF8//NE | -0.401 | 0.757 | 7.592 | -1.992 |
| NBPF12                            | -0.267 | 0.831 | 5.718 | -1.000 |
| NBPF14//NBPF10//NBPF26            | -0.254 | 0.838 | 6.810 | -1.177 |
| NBPF19//AC023137.2                | -1.032 | 0.489 | 2.622 | -2.312 |
| NBPF20                            | -0.455 | 0.729 | 7.869 | -1.381 |
| NBPF20                            | -0.454 | 0.730 | 6.368 | -1.368 |
| NBPF20//NBPF14//NBPF8//NBPF23//NE | -0.453 | 0.731 | 8.348 | -2.060 |
| NBPF25P//NOTCH2NL//LOC100996763   | -0.386 | 0.765 | 5.426 | -1.091 |
| NBR2                              | -0.229 | 0.853 | 3.829 | -0.790 |
| NCALD                             | 0.519  | 1.433 | 3.012 | 2.046  |
| NCAM2                             | -0.078 | 0.947 | 8.416 | -0.408 |
| NCAN                              | 0.537  | 1.451 | 6.677 | 1.504  |
| NCAPD2                            | -0.369 | 0.774 | 5.329 | -1.434 |
| NCBP2-AS2                         | 0.349  | 1.274 | 5.541 | 1.877  |
| NCDN                              | 0.554  | 1.468 | 6.455 | 1.819  |
| NCEH1                             | 1.163  | 2.240 | 5.827 | 2.519  |
| NCF1C                             | -1.105 | 0.465 | 3.402 | -2.885 |
| NCF2                              | -0.147 | 0.903 | 4.979 | -0.369 |
| NCF4                              | -0.187 | 0.878 | 4.483 | -0.549 |
| NCK1-AS1//RP11-85F14.5            | -0.295 | 0.815 | 3.510 | -0.968 |
| NCK2                              | 0.411  | 1.329 | 6.697 | 1.821  |
| NCKAP1                            | 0.570  | 1.484 | 9.218 | 2.619  |
| NCKAP1L                           | -0.463 | 0.725 | 5.501 | -1.072 |
| NCKAP5                            | -0.791 | 0.578 | 5.262 | -2.219 |
| NCKAP5-IT1                        | -0.756 | 0.592 | 2.983 | -1.645 |

|                                 |        |       |        |        |
|---------------------------------|--------|-------|--------|--------|
| NCKIPSD                         | 0.501  | 1.416 | 5.620  | 2.213  |
| NCMAP                           | -0.381 | 0.768 | 3.419  | -0.668 |
| NCOA5                           | -0.604 | 0.658 | 6.060  | -2.270 |
| NCOA7                           | 0.055  | 1.039 | 7.321  | 0.240  |
| NCR3LG1                         | 1.206  | 2.307 | 4.191  | 2.538  |
| NCRNA00185//TTY14               | 0.166  | 1.122 | 2.041  | 0.436  |
| NCRNA00185//TTY14//LOC102723889 | -0.069 | 0.953 | 3.963  | -0.091 |
| NCS1                            | 1.063  | 2.089 | 7.348  | 2.276  |
| ND6                             | -0.140 | 0.907 | 8.506  | -0.525 |
| NDE1                            | -1.190 | 0.438 | 7.450  | -3.103 |
| NDEL1                           | 0.491  | 1.406 | 7.734  | 2.225  |
| NDFIP1                          | 0.333  | 1.260 | 7.192  | 1.662  |
| NDFIP2                          | 0.741  | 1.671 | 6.328  | 2.709  |
| NDN                             | -0.089 | 0.940 | 4.023  | -0.397 |
| NDNF                            | -0.864 | 0.549 | 3.216  | -2.419 |
| NDP                             | 0.064  | 1.045 | 5.194  | 0.234  |
| NDRG1                           | -0.790 | 0.578 | 5.802  | -2.716 |
| NDRG2                           | -0.581 | 0.669 | 6.408  | -2.281 |
| NDRG3                           | 0.438  | 1.354 | 7.248  | 1.755  |
| NDRG4                           | 0.723  | 1.651 | 7.610  | 1.999  |
| NDST1                           | -0.345 | 0.787 | 6.750  | -1.688 |
| NDST3                           | 1.201  | 2.300 | 3.819  | 2.432  |
| NDST4                           | -0.743 | 0.598 | 2.309  | -2.172 |
| NDUFA5                          | 0.524  | 1.438 | 4.343  | 2.674  |
| NDUFA6-AS1                      | 0.614  | 1.531 | 2.954  | 1.435  |
| NDUFA9//RP11-500M8.7            | 0.200  | 1.148 | 7.133  | 1.073  |
| NDUFAF1                         | 0.637  | 1.555 | 3.799  | 2.638  |
| NDUFAF5                         | 0.618  | 1.534 | 3.684  | 2.499  |
| NDUFAF7                         | 0.302  | 1.233 | 5.250  | 1.616  |
| NDUFB5                          | 0.565  | 1.480 | 4.771  | 2.245  |
| NEAT1//MIR612                   | -0.593 | 0.663 | 9.809  | -1.398 |
| NEAT1//MIR612                   | -0.374 | 0.772 | 3.756  | -0.964 |
| NEBL-AS1                        | 0.147  | 1.107 | 2.950  | 0.539  |
| NECAB1                          | 0.591  | 1.506 | 7.615  | 1.853  |
| NECAB2                          | 0.728  | 1.656 | 5.470  | 1.689  |
| NECAB3                          | 0.054  | 1.038 | 4.472  | 0.209  |
| NECAP1                          | 0.554  | 1.468 | 7.131  | 1.817  |
| NECAP2                          | -0.618 | 0.652 | 5.476  | -3.000 |
| NEDD1                           | -0.055 | 0.963 | 5.501  | -0.250 |
| NEDD4L                          | 0.854  | 1.808 | 6.402  | 2.145  |
| NEFH                            | 0.699  | 1.624 | 8.367  | 0.822  |
| NEFL                            | 1.068  | 2.097 | 10.027 | 1.256  |
| NEFM                            | 0.746  | 1.677 | 9.736  | 1.100  |
| NEGR1                           | 0.901  | 1.867 | 7.098  | 2.830  |
| NEGR1-IT1                       | 0.438  | 1.355 | 2.165  | 1.546  |
| NEK10                           | 0.749  | 1.680 | 3.163  | 2.033  |
| NEK3                            | -0.711 | 0.611 | 4.519  | -1.795 |
| NEK5//LOC100506859              | -0.465 | 0.725 | 2.967  | -1.307 |
| NEK7                            | -0.357 | 0.781 | 6.538  | -1.523 |
| NELL1                           | 0.987  | 1.982 | 4.078  | 2.139  |

|                       |        |       |       |        |
|-----------------------|--------|-------|-------|--------|
| NELL2                 | 1.374  | 2.592 | 5.369 | 2.699  |
| NENF                  | -0.313 | 0.805 | 5.597 | -1.417 |
| NES                   | -0.526 | 0.695 | 5.297 | -2.102 |
| NET1                  | -0.199 | 0.871 | 6.177 | -0.875 |
| NETO1                 | 1.631  | 3.097 | 5.139 | 2.858  |
| NETO2                 | 0.584  | 1.499 | 6.126 | 1.408  |
| NEURL1//NEURL         | 0.980  | 1.973 | 4.576 | 2.641  |
| NEURL1B               | 0.241  | 1.182 | 2.943 | 0.913  |
| NEURL4                | 0.187  | 1.138 | 4.950 | 0.845  |
| NEUROD1               | 0.586  | 1.501 | 1.823 | 1.999  |
| NEUROD2               | 1.545  | 2.917 | 3.574 | 2.692  |
| NEUROD6               | 2.540  | 5.814 | 3.535 | 3.457  |
| NF2                   | 0.268  | 1.204 | 6.236 | 1.254  |
| NFAM1                 | -0.244 | 0.844 | 3.524 | -1.053 |
| NFATC1                | -0.440 | 0.737 | 4.131 | -1.833 |
| NFATC2                | -0.276 | 0.826 | 4.452 | -1.047 |
| NFATC4                | -0.198 | 0.872 | 3.322 | -0.880 |
| NFE2L2                | -0.389 | 0.764 | 6.800 | -1.726 |
| NFE2L3                | -0.611 | 0.655 | 2.136 | -1.988 |
| NFIA-AS2//RP4-668G5.1 | -0.404 | 0.756 | 2.896 | -1.157 |
| NFIL3                 | 0.445  | 1.362 | 5.813 | 0.946  |
| NFKB2                 | -0.446 | 0.734 | 3.336 | -1.872 |
| NFKBIA                | -0.115 | 0.923 | 7.231 | -0.426 |
| NFKBIE                | -0.080 | 0.946 | 3.257 | -0.338 |
| NFKBIZ                | -0.032 | 0.978 | 4.709 | -0.135 |
| NGB                   | -0.117 | 0.922 | 2.893 | -0.411 |
| NGEF                  | 0.880  | 1.841 | 4.580 | 2.125  |
| NGFR                  | -0.810 | 0.570 | 3.681 | -2.386 |
| NGRN                  | 0.425  | 1.343 | 8.900 | 1.876  |
| NGRN                  | 0.292  | 1.224 | 4.256 | 1.121  |
| NHLRC1                | 0.084  | 1.060 | 2.630 | 0.383  |
| NHLRC3                | -0.044 | 0.970 | 5.475 | -0.158 |
| NHS                   | 0.595  | 1.510 | 4.132 | 2.088  |
| NHSL1                 | -0.572 | 0.673 | 4.236 | -2.434 |
| NHSL2                 | 0.333  | 1.260 | 3.444 | 1.112  |
| NICN1                 | 0.312  | 1.241 | 6.297 | 1.335  |
| NID1                  | 0.423  | 1.341 | 4.891 | 1.509  |
| NID2                  | -0.213 | 0.863 | 3.942 | -0.897 |
| NIM1K//NIM1           | 0.490  | 1.405 | 4.672 | 1.721  |
| NINJ1                 | -0.230 | 0.852 | 5.347 | -0.901 |
| NINJ2                 | -0.895 | 0.538 | 4.055 | -2.926 |
| NINL                  | -0.291 | 0.817 | 4.295 | -1.121 |
| NIPA2                 | 0.241  | 1.182 | 5.156 | 1.069  |
| NIPAL2                | 1.165  | 2.242 | 4.769 | 2.680  |
| NIPAL3                | -0.612 | 0.654 | 6.974 | -2.371 |
| NIPAL4                | -1.437 | 0.369 | 3.833 | -2.677 |
| NIPSNAP1              | 0.326  | 1.254 | 5.548 | 1.384  |
| NIPSNAP3B             | 1.145  | 2.211 | 4.007 | 2.624  |
| NKAIN1                | -0.769 | 0.587 | 3.697 | -3.378 |
| NKAIN2                | -0.570 | 0.674 | 8.380 | -2.040 |

|                     |        |       |       |        |
|---------------------|--------|-------|-------|--------|
| NKAIN3              | 0.166  | 1.122 | 5.906 | 0.646  |
| NKAIN4              | -0.068 | 0.954 | 2.953 | -0.271 |
| NKD1                | -0.799 | 0.575 | 5.448 | -2.683 |
| NKG7                | -0.237 | 0.849 | 3.108 | -0.894 |
| NKIRAS1             | 0.241  | 1.182 | 4.446 | 1.287  |
| NKRF                | 0.393  | 1.313 | 3.963 | 1.625  |
| NKX2-2              | -0.986 | 0.505 | 5.745 | -2.602 |
| NKX3-1              | 0.135  | 1.098 | 3.111 | 0.483  |
| NKX6-1              | 0.004  | 1.003 | 2.693 | 0.021  |
| NKX6-2              | -1.177 | 0.442 | 6.861 | -2.686 |
| NLE1                | 0.230  | 1.173 | 4.463 | 1.064  |
| NLGN1               | 0.413  | 1.332 | 5.443 | 1.563  |
| NLGN4Y-AS1          | -0.011 | 0.992 | 2.537 | -0.041 |
| NLK                 | 0.602  | 1.518 | 8.637 | 2.097  |
| NLRC5               | -0.288 | 0.819 | 3.097 | -1.303 |
| NLRP1               | -0.917 | 0.530 | 3.283 | -3.213 |
| NLRP2               | 0.418  | 1.336 | 2.531 | 1.626  |
| NLRP3               | 0.047  | 1.033 | 4.240 | 0.149  |
| NMB                 | -0.993 | 0.502 | 4.593 | -3.145 |
| NME5                | 0.649  | 1.568 | 3.559 | 1.821  |
| NME9                | 0.212  | 1.158 | 3.438 | 0.652  |
| NMI                 | 0.248  | 1.188 | 3.217 | 0.936  |
| NMNAT2              | 1.299  | 2.461 | 6.681 | 2.247  |
| NMRK1               | 0.458  | 1.374 | 3.850 | 1.921  |
| NMT2                | 0.188  | 1.140 | 4.497 | 0.887  |
| NMUR2               | -0.282 | 0.823 | 2.513 | -0.939 |
| NNAT                | 1.210  | 2.314 | 5.312 | 2.371  |
| NNMT//LOC101928916  | 0.287  | 1.220 | 3.063 | 0.761  |
| NNT                 | 0.510  | 1.424 | 7.511 | 2.278  |
| NOA1                | 0.029  | 1.020 | 5.758 | 0.127  |
| NOD1                | -0.152 | 0.900 | 4.401 | -0.569 |
| NOD2                | -0.100 | 0.933 | 2.104 | -0.387 |
| NOL3                | 0.019  | 1.013 | 4.459 | 0.075  |
| NOL4                | 0.942  | 1.921 | 5.731 | 2.441  |
| NOL6                | 0.392  | 1.312 | 4.426 | 1.577  |
| NOMO1               | 0.282  | 1.216 | 7.257 | 1.361  |
| NOMO2//NOMO3//NOMO1 | 0.330  | 1.257 | 9.309 | 1.642  |
| NOMO2//NOMO3//NOMO1 | 0.325  | 1.253 | 9.272 | 1.583  |
| NOP14-AS1           | -0.541 | 0.687 | 3.890 | -1.943 |
| NOS1AP              | 0.488  | 1.403 | 4.237 | 1.938  |
| NOS2                | 1.080  | 2.114 | 2.429 | 3.300  |
| NOS3                | 0.429  | 1.346 | 3.793 | 1.475  |
| NOSTRIN             | -0.031 | 0.978 | 3.066 | -0.115 |
| NOTCH1              | -0.740 | 0.599 | 6.517 | -2.949 |
| NOTCH2NL            | -0.479 | 0.717 | 5.764 | -1.494 |
| NOTCH2NL            | 0.119  | 1.086 | 7.181 | 0.512  |
| NOTCH3              | 0.228  | 1.171 | 4.127 | 0.789  |
| NOV                 | 1.308  | 2.475 | 4.722 | 1.755  |
| NOVA2               | 0.385  | 1.306 | 4.894 | 1.623  |
| NOXA1               | 0.501  | 1.415 | 3.700 | 1.632  |

|                                  |        |       |       |        |
|----------------------------------|--------|-------|-------|--------|
| NOXO1                            | 0.192  | 1.143 | 2.652 | 0.728  |
| NPAP1                            | -0.804 | 0.573 | 2.779 | -2.571 |
| NPAS1                            | 0.118  | 1.085 | 2.313 | 0.470  |
| NPAS3                            | -0.444 | 0.735 | 5.750 | -1.738 |
| NPB                              | -0.012 | 0.992 | 2.442 | -0.041 |
| NPC1                             | -0.772 | 0.586 | 7.543 | -2.325 |
| NPC2//MIR4709                    | -0.629 | 0.646 | 8.661 | -1.936 |
| NPFF//RP11-793H13.10             | -0.802 | 0.573 | 3.725 | -3.704 |
| NPFFR1                           | 0.074  | 1.053 | 3.005 | 0.247  |
| NPIP11//NPIP5//NPIP3//NPIP4//NI  | -0.421 | 0.747 | 9.019 | -1.758 |
| NPIP3                            | -0.391 | 0.763 | 8.293 | -1.251 |
| NPIP3//NPIP5//NPIP4              | -0.219 | 0.859 | 7.464 | -0.863 |
| NPIP4//LOC613037//NPIP5//NPIPA5/ | -0.436 | 0.739 | 8.616 | -1.741 |
| NPIP5//NPIP3//NPIP4//LOC613037/  | -0.442 | 0.736 | 9.092 | -1.857 |
| NPIP5//NPIP4//LOC613037//NPIPA5/ | -0.365 | 0.777 | 8.918 | -1.542 |
| NPIP6                            | -0.580 | 0.669 | 5.592 | -1.682 |
| NPIP8//NPIP9//NPIP6//NPIP15//NI  | -0.479 | 0.718 | 7.508 | -2.090 |
| NPL                              | -0.778 | 0.583 | 5.531 | -2.586 |
| NPM2                             | 0.929  | 1.904 | 4.550 | 2.560  |
| NPM3                             | 0.311  | 1.240 | 3.310 | 1.274  |
| NPNT                             | -0.068 | 0.954 | 3.266 | -0.223 |
| NPPA                             | -0.328 | 0.796 | 2.661 | -0.915 |
| NPPC                             | -0.005 | 0.996 | 5.628 | -0.011 |
| NPR3                             | -0.217 | 0.860 | 2.661 | -0.738 |
| NPTN                             | 0.770  | 1.706 | 8.338 | 2.363  |
| NPTX1                            | 1.081  | 2.115 | 5.611 | 1.921  |
| NPTX2                            | -0.465 | 0.725 | 5.365 | -0.736 |
| NPTXR                            | 0.852  | 1.805 | 5.147 | 2.065  |
| NPW                              | 0.028  | 1.019 | 2.890 | 0.143  |
| NPY                              | 0.649  | 1.568 | 3.934 | 1.720  |
| NPY1R                            | 1.214  | 2.320 | 4.752 | 2.379  |
| NPY2R                            | 0.342  | 1.267 | 3.220 | 1.023  |
| NPY5R                            | 0.741  | 1.671 | 2.830 | 2.547  |
| NQO1                             | 0.101  | 1.072 | 5.950 | 0.347  |
| NQO2//RP1-90J20.11               | 0.477  | 1.392 | 4.668 | 1.266  |
| NR1D1                            | 0.580  | 1.495 | 6.338 | 1.996  |
| NR1D2                            | 0.303  | 1.234 | 6.067 | 1.426  |
| NR2E1                            | 1.543  | 2.914 | 3.091 | 2.510  |
| NR2F1-AS1                        | 0.610  | 1.526 | 4.516 | 2.753  |
| NR2F2                            | -0.156 | 0.898 | 2.612 | -0.575 |
| NR2F6                            | 0.114  | 1.083 | 5.236 | 0.470  |
| NR3C2                            | 0.394  | 1.314 | 5.703 | 1.716  |
| NR4A1                            | 0.020  | 1.014 | 4.106 | 0.067  |
| NR4A2                            | 0.496  | 1.411 | 4.763 | 1.260  |
| NR4A3                            | -0.070 | 0.952 | 3.400 | -0.160 |
| NRBF2                            | 0.132  | 1.096 | 5.779 | 0.490  |
| NRBP2//MIR6845                   | -0.781 | 0.582 | 6.422 | -2.968 |
| NRCAM                            | 0.575  | 1.490 | 8.430 | 2.643  |
| NREP                             | 0.485  | 1.399 | 2.733 | 1.898  |
| NRG1                             | 0.269  | 1.205 | 4.108 | 0.590  |

|                          |        |       |       |        |
|--------------------------|--------|-------|-------|--------|
| NRG1-IT1                 | 0.191  | 1.142 | 2.926 | 0.610  |
| NRG1-IT2                 | 0.329  | 1.256 | 2.225 | 0.981  |
| NRG1-IT3                 | 0.093  | 1.066 | 2.250 | 0.331  |
| NRG3                     | 0.262  | 1.199 | 5.228 | 1.183  |
| NRG4                     | 0.011  | 1.008 | 3.302 | 0.036  |
| NRGN                     | 2.340  | 5.063 | 6.031 | 3.065  |
| NRIP2                    | -0.043 | 0.971 | 4.749 | -0.159 |
| NRIP3                    | 0.865  | 1.822 | 5.399 | 1.600  |
| NRN1                     | 1.266  | 2.405 | 7.810 | 2.410  |
| NRP1                     | 0.781  | 1.719 | 5.816 | 2.374  |
| NRP2                     | -0.232 | 0.852 | 4.552 | -0.995 |
| NRSN1                    | 0.918  | 1.889 | 4.821 | 2.090  |
| NRSN2                    | 0.835  | 1.784 | 5.332 | 2.388  |
| NRXN1                    | 0.921  | 1.894 | 6.909 | 2.440  |
| NRXN3                    | 0.681  | 1.603 | 6.897 | 2.052  |
| NS3BP                    | -0.461 | 0.726 | 3.831 | -1.172 |
| NSF//LOC101930324        | 0.749  | 1.681 | 8.140 | 1.665  |
| NSF//NSFP1//LOC101930324 | 0.785  | 1.723 | 8.276 | 1.806  |
| NSG1                     | 0.384  | 1.305 | 3.073 | 1.178  |
| NSMF//MIR7114            | 0.722  | 1.650 | 7.221 | 2.330  |
| NSUN5P1                  | -0.499 | 0.708 | 4.826 | -1.527 |
| NT5C                     | -0.538 | 0.689 | 4.490 | -2.346 |
| NT5C1A                   | 0.395  | 1.315 | 3.677 | 1.043  |
| NT5C3B                   | 0.470  | 1.385 | 6.518 | 1.831  |
| NT5DC1                   | -0.322 | 0.800 | 6.590 | -1.162 |
| NT5DC3                   | 0.816  | 1.760 | 5.706 | 2.424  |
| NT5E                     | -0.127 | 0.916 | 4.481 | -0.441 |
| NTM-IT                   | -0.515 | 0.700 | 3.020 | -1.775 |
| NTN1                     | -0.494 | 0.710 | 4.458 | -1.702 |
| NTN3                     | 0.425  | 1.343 | 2.350 | 1.497  |
| NTN4                     | 0.805  | 1.748 | 5.350 | 2.672  |
| NTNG1                    | 0.744  | 1.675 | 4.977 | 2.391  |
| NTNG2                    | 0.220  | 1.164 | 4.879 | 0.817  |
| NTSR2                    | -0.249 | 0.841 | 6.119 | -0.825 |
| NUAK1                    | 0.659  | 1.579 | 6.655 | 2.239  |
| NUAK2                    | 0.262  | 1.199 | 3.316 | 0.770  |
| NUDT1                    | -0.435 | 0.739 | 3.448 | -1.849 |
| NUDT10                   | 0.525  | 1.439 | 4.018 | 1.802  |
| NUDT11                   | 1.276  | 2.421 | 4.594 | 2.322  |
| NUDT13                   | -0.413 | 0.751 | 2.753 | -1.575 |
| NUDT16P1//NUDT16P        | -0.222 | 0.857 | 3.720 | -0.994 |
| NUDT19                   | -0.160 | 0.895 | 4.295 | -0.628 |
| NUDT21                   | 0.283  | 1.216 | 8.210 | 1.543  |
| NUDT3                    | 0.348  | 1.273 | 9.258 | 1.528  |
| NUDT4                    | 0.618  | 1.534 | 2.790 | 1.957  |
| NUDT4P1//NUDT4P2         | 0.931  | 1.907 | 2.737 | 3.554  |
| NUDT9P1                  | 0.743  | 1.674 | 2.742 | 2.516  |
| NUFIP1                   | 0.344  | 1.269 | 4.924 | 1.469  |
| NUMBL                    | 0.636  | 1.554 | 5.093 | 2.338  |
| NUP155                   | 0.170  | 1.125 | 6.014 | 0.700  |



|                   |        |       |       |        |
|-------------------|--------|-------|-------|--------|
| NUPR1             | -0.573 | 0.672 | 7.437 | -1.587 |
| NUPR1L            | 0.359  | 1.282 | 2.565 | 0.975  |
| NUSAP1            | -0.215 | 0.861 | 2.318 | -0.763 |
| NUTM2D            | -0.024 | 0.983 | 3.937 | -0.087 |
| NWD1              | -0.436 | 0.739 | 4.263 | -1.348 |
| NWD2//KIAA1239    | 1.333  | 2.520 | 3.044 | 2.653  |
| NXNL2             | -0.006 | 0.996 | 2.419 | -0.021 |
| NXPE3             | -0.420 | 0.748 | 6.832 | -1.628 |
| NXPH1             | 0.575  | 1.489 | 4.981 | 1.955  |
| NXPH2             | 0.482  | 1.397 | 3.064 | 1.366  |
| NXPH3             | 0.373  | 1.295 | 4.241 | 1.135  |
| NXT1              | 0.134  | 1.098 | 3.551 | 0.585  |
| NYAP1             | 0.540  | 1.454 | 4.129 | 1.642  |
| NYAP2             | 1.226  | 2.339 | 4.100 | 2.450  |
| NYNRIN            | -0.140 | 0.908 | 3.664 | -0.502 |
| OAF               | 0.583  | 1.498 | 2.040 | 2.269  |
| OAF               | 0.581  | 1.496 | 3.843 | 2.184  |
| OARD1             | -0.710 | 0.611 | 4.837 | -2.618 |
| OAS1              | -0.366 | 0.776 | 3.342 | -1.328 |
| OAS2              | -0.110 | 0.926 | 3.940 | -0.389 |
| OAS3              | 0.159  | 1.116 | 3.023 | 0.595  |
| OASL              | 0.297  | 1.229 | 2.237 | 1.167  |
| OBFC1             | -0.088 | 0.941 | 5.324 | -0.311 |
| OBP2A             | -0.230 | 0.853 | 2.741 | -0.794 |
| OCA2              | 0.680  | 1.602 | 2.707 | 1.788  |
| OCEL1             | 0.538  | 1.452 | 3.940 | 1.707  |
| OCIAD2            | 0.023  | 1.016 | 3.007 | 0.078  |
| OCLM              | -0.343 | 0.788 | 2.307 | -1.324 |
| OCLN              | -0.359 | 0.780 | 2.900 | -1.381 |
| OCRL              | 0.553  | 1.468 | 6.606 | 2.387  |
| ODF2L             | 0.375  | 1.296 | 5.392 | 1.507  |
| ODF3B             | -0.452 | 0.731 | 3.083 | -1.432 |
| OGDHL             | 0.527  | 1.441 | 6.297 | 1.032  |
| OGFRL1            | -0.179 | 0.883 | 9.038 | -0.795 |
| OGN               | 1.566  | 2.962 | 5.037 | 2.816  |
| OIP5-AS1          | 0.566  | 1.481 | 4.982 | 2.771  |
| OLA1              | 0.308  | 1.238 | 5.818 | 1.587  |
| OLFM1             | 0.863  | 1.819 | 4.594 | 2.505  |
| OLFM2             | 0.555  | 1.470 | 6.587 | 1.618  |
| OLFM3             | 1.299  | 2.461 | 3.841 | 2.376  |
| OLFM4             | 0.010  | 1.007 | 2.355 | 0.031  |
| OLFML1            | 0.148  | 1.108 | 2.659 | 0.473  |
| OLFML2A           | 0.066  | 1.047 | 2.815 | 0.183  |
| OLFML2B           | 0.410  | 1.328 | 4.028 | 1.489  |
| OLFML3            | -0.230 | 0.853 | 3.470 | -0.741 |
| OLIG1             | -0.980 | 0.507 | 6.322 | -2.790 |
| OLIG2             | -1.223 | 0.428 | 4.611 | -3.823 |
| OLR1              | -1.064 | 0.478 | 5.591 | -2.351 |
| OMD               | 0.827  | 1.775 | 3.845 | 1.626  |
| OMG//LOC101927057 | 0.126  | 1.092 | 6.592 | 0.428  |

|                                          |        |       |       |        |
|------------------------------------------|--------|-------|-------|--------|
| OPA1                                     | 0.296  | 1.228 | 6.877 | 1.612  |
| OPALIN                                   | -0.329 | 0.796 | 6.749 | -0.741 |
| OPCML                                    | 1.346  | 2.543 | 5.959 | 2.814  |
| OPCML                                    | 0.462  | 1.377 | 4.236 | 1.306  |
| OPCML-IT2                                | 0.849  | 1.802 | 4.059 | 1.947  |
| OPLAH                                    | -0.426 | 0.745 | 3.667 | -1.477 |
| OPN3                                     | 1.181  | 2.267 | 4.227 | 3.011  |
| OPN4                                     | 0.285  | 1.219 | 2.689 | 1.074  |
| OPRD1                                    | 0.723  | 1.651 | 3.515 | 1.958  |
| OPRK1                                    | 0.867  | 1.824 | 3.190 | 2.450  |
| OPRL1                                    | 0.175  | 1.129 | 4.043 | 0.617  |
| OPRM1                                    | 0.997  | 1.996 | 3.409 | 3.242  |
| OR14I1                                   | 1.792  | 3.463 | 2.508 | 2.551  |
| OR2A1-AS1//LOC101928605//RP4-545C        | -0.154 | 0.899 | 1.958 | -0.552 |
| OR2A9P//OR2A20P//OR2A1-AS1//LOC101928605 | -0.157 | 0.897 | 3.704 | -0.586 |
| OR2AK2                                   | -0.156 | 0.897 | 2.980 | -0.526 |
| OR2L13                                   | -0.354 | 0.782 | 4.548 | -1.138 |
| OR2L1P                                   | -0.266 | 0.831 | 5.958 | -0.640 |
| OR2L2                                    | -0.418 | 0.749 | 2.915 | -0.975 |
| OR2L3                                    | 0.046  | 1.032 | 2.833 | 0.146  |
| OR2L5                                    | -0.322 | 0.800 | 3.220 | -0.728 |
| OR2L8                                    | -0.473 | 0.720 | 4.498 | -1.250 |
| OR2M4                                    | 0.168  | 1.123 | 2.642 | 0.470  |
| OR2T12                                   | -0.233 | 0.851 | 3.376 | -0.825 |
| OR6W1P                                   | -0.742 | 0.598 | 3.361 | -2.026 |
| OR7A5                                    | -0.988 | 0.504 | 2.562 | -1.649 |
| OR7C1                                    | -0.838 | 0.559 | 2.719 | -1.890 |
| OR7E47P                                  | 0.398  | 1.318 | 2.531 | 1.172  |
| OR7E91P                                  | 0.341  | 1.267 | 3.536 | 1.289  |
| OR9A2                                    | -1.166 | 0.446 | 2.894 | -2.115 |
| ORAI1                                    | -0.082 | 0.945 | 3.459 | -0.291 |
| ORAI3                                    | -0.387 | 0.765 | 3.375 | -1.577 |
| ORC4                                     | 0.494  | 1.409 | 5.284 | 2.232  |
| ORC5                                     | 0.324  | 1.252 | 5.812 | 1.821  |
| ORC6                                     | 0.480  | 1.395 | 2.910 | 1.628  |
| ORMDL2                                   | -0.614 | 0.654 | 4.568 | -2.527 |
| OSBPL10                                  | 0.491  | 1.406 | 2.823 | 1.833  |
| OSBPL11                                  | -0.143 | 0.905 | 6.941 | -0.495 |
| OSBPL3                                   | 0.733  | 1.662 | 5.332 | 2.420  |
| OSBPL6                                   | 0.604  | 1.520 | 5.667 | 2.217  |
| OSCAR                                    | -0.073 | 0.951 | 2.683 | -0.236 |
| OSCP1                                    | 0.582  | 1.497 | 4.235 | 2.448  |
| OSER1-AS1                                | -0.439 | 0.738 | 3.270 | -1.703 |
| OSGIN1                                   | -0.259 | 0.836 | 3.142 | -1.025 |
| OSGIN2                                   | 0.008  | 1.005 | 4.851 | 0.028  |
| OSM                                      | -0.017 | 0.988 | 2.029 | -0.065 |
| OSMR                                     | 0.690  | 1.614 | 5.789 | 1.574  |
| OSTF1                                    | 0.234  | 1.176 | 7.661 | 0.968  |
| OSTM1-AS1                                | 0.391  | 1.311 | 2.463 | 1.295  |
| OTOGL                                    | 1.254  | 2.385 | 2.580 | 3.498  |

|                                   |        |       |       |        |
|-----------------------------------|--------|-------|-------|--------|
| OTOS                              | 0.173  | 1.127 | 3.569 | 0.560  |
| OTUB2                             | 0.524  | 1.438 | 2.931 | 1.987  |
| OTUD3                             | 0.658  | 1.578 | 4.987 | 2.722  |
| OTUD7A                            | -0.229 | 0.853 | 5.999 | -1.145 |
| OTUD7B                            | -0.789 | 0.579 | 7.194 | -2.772 |
| OVGP1                             | 0.600  | 1.516 | 3.964 | 2.284  |
| OVOL3                             | -0.447 | 0.734 | 2.499 | -1.788 |
| OXCT1                             | 0.477  | 1.392 | 7.328 | 2.008  |
| OXCT2                             | -0.391 | 0.762 | 2.546 | -1.241 |
| OXGR1                             | 0.177  | 1.130 | 2.013 | 0.548  |
| OXR1                              | 1.133  | 2.193 | 6.363 | 3.345  |
| OXR1//RP11-227D13.2               | 0.674  | 1.596 | 7.349 | 1.957  |
| OXT                               | 0.217  | 1.162 | 3.024 | 0.566  |
| OXTR                              | 0.104  | 1.075 | 3.898 | 0.301  |
| P2RX1                             | -0.372 | 0.773 | 2.888 | -1.453 |
| P2RX3                             | -0.143 | 0.906 | 2.318 | -0.618 |
| P2RX4                             | -0.102 | 0.932 | 3.051 | -0.392 |
| P2RX6                             | 0.374  | 1.296 | 3.845 | 1.376  |
| P2RX6P                            | 0.763  | 1.697 | 1.982 | 1.647  |
| P2RX7                             | -0.856 | 0.552 | 6.426 | -2.458 |
| P2RY1                             | -0.523 | 0.696 | 5.034 | -1.655 |
| P2RY12                            | -0.495 | 0.709 | 5.572 | -1.032 |
| P2RY13                            | -0.578 | 0.670 | 4.963 | -1.218 |
| P2RY14                            | -0.119 | 0.921 | 3.947 | -0.476 |
| P4HA1                             | -0.915 | 0.530 | 6.985 | -2.303 |
| PABPC1L                           | -0.084 | 0.943 | 2.699 | -0.286 |
| PABPC1L2A//PABPC1L2B//RP11-493K23 | 1.064  | 2.091 | 1.598 | 3.172  |
| PABPC1L2B//PABPC1L2A              | 1.049  | 2.070 | 2.766 | 2.161  |
| PABPC5                            | -0.574 | 0.672 | 3.721 | -1.988 |
| PACRG                             | 0.253  | 1.192 | 3.990 | 0.988  |
| PACRG-AS1                         | -0.715 | 0.609 | 2.836 | -2.290 |
| PACS2                             | -0.702 | 0.615 | 6.154 | -2.827 |
| PACSIN1                           | 1.262  | 2.399 | 5.998 | 2.084  |
| PACSIN3                           | -0.400 | 0.758 | 5.458 | -1.271 |
| PADI2                             | -0.755 | 0.593 | 8.633 | -1.810 |
| PAFAH1B1                          | 0.205  | 1.152 | 8.606 | 1.112  |
| PAFAH1B3                          | 0.291  | 1.223 | 4.523 | 1.072  |
| PAGR1//CTD-2574D22.6              | -0.182 | 0.881 | 5.093 | -0.881 |
| PAH//LOC101929036                 | 0.435  | 1.352 | 2.123 | 1.767  |
| PAIP2//CTB-43P18.1                | 0.069  | 1.049 | 5.622 | 0.257  |
| PAIP2B//VPS36                     | -0.974 | 0.509 | 8.307 | -2.608 |
| PAK1                              | 1.187  | 2.277 | 7.128 | 3.180  |
| PAK2                              | -0.350 | 0.785 | 6.200 | -1.404 |
| PAK3                              | 1.033  | 2.046 | 5.693 | 2.150  |
| PAK7                              | 1.521  | 2.870 | 4.566 | 2.634  |
| PALD1                             | -0.551 | 0.683 | 4.276 | -2.293 |
| PALM2-AKAP2//AKAP2//PALM2         | 0.265  | 1.202 | 4.798 | 1.215  |
| PALMD                             | -0.151 | 0.900 | 5.052 | -0.578 |
| PAM                               | 0.424  | 1.342 | 6.914 | 1.609  |
| PAMR1                             | -0.109 | 0.927 | 5.936 | -0.375 |

|                        |        |       |       |        |
|------------------------|--------|-------|-------|--------|
| PANK1                  | 0.532  | 1.446 | 2.684 | 2.289  |
| PANX1                  | 0.600  | 1.516 | 4.948 | 1.968  |
| PANX2                  | 0.741  | 1.672 | 4.790 | 1.577  |
| PAPD7                  | 0.178  | 1.131 | 5.520 | 0.948  |
| PAPLN                  | -0.031 | 0.979 | 3.495 | -0.112 |
| PAPPA                  | -0.427 | 0.744 | 2.880 | -1.160 |
| PAPSS2                 | 0.237  | 1.179 | 4.708 | 0.855  |
| PAQR4                  | -0.768 | 0.587 | 6.284 | -2.346 |
| PAQR5                  | 0.154  | 1.113 | 4.660 | 0.504  |
| PAQR6                  | -1.283 | 0.411 | 8.355 | -3.423 |
| PAQR8                  | -0.727 | 0.604 | 4.954 | -2.338 |
| PARD3                  | -0.493 | 0.710 | 5.664 | -2.316 |
| PARD3B                 | -0.668 | 0.630 | 5.319 | -2.874 |
| PARD6A                 | 0.497  | 1.411 | 4.930 | 1.621  |
| PARD6G                 | -0.532 | 0.692 | 2.146 | -2.101 |
| PARD6G-AS1//AC139100.2 | -0.432 | 0.741 | 3.565 | -1.404 |
| PARG                   | 0.226  | 1.170 | 5.166 | 0.995  |
| PARK2                  | 0.570  | 1.484 | 5.857 | 2.090  |
| PARM1                  | 1.306  | 2.473 | 7.229 | 2.102  |
| PARP12                 | -0.246 | 0.843 | 4.807 | -0.941 |
| PARP14                 | 0.228  | 1.172 | 5.989 | 0.799  |
| PARP2                  | 0.468  | 1.384 | 4.595 | 1.998  |
| PARP4                  | -0.796 | 0.576 | 7.510 | -2.465 |
| PARP9                  | -0.145 | 0.904 | 4.865 | -0.616 |
| PARS2                  | 0.127  | 1.092 | 3.105 | 0.465  |
| PART1                  | 1.736  | 3.330 | 2.763 | 3.423  |
| PARVG                  | -0.401 | 0.757 | 3.471 | -1.397 |
| PAX2                   | -0.418 | 0.748 | 2.374 | -1.387 |
| PAX3                   | -0.372 | 0.773 | 3.839 | -1.205 |
| PAX8                   | -0.243 | 0.845 | 2.055 | -0.700 |
| PAX8-AS1//AC016683.6   | -0.245 | 0.844 | 2.294 | -0.772 |
| PAXBP1-AS1             | -0.351 | 0.784 | 3.204 | -1.082 |
| PBLD                   | 0.082  | 1.059 | 5.069 | 0.331  |
| PBX1                   | -0.479 | 0.718 | 4.231 | -1.526 |
| PBX3                   | -0.917 | 0.530 | 4.801 | -2.601 |
| PBXIP1                 | -0.190 | 0.877 | 5.439 | -0.778 |
| PCBD2                  | -0.518 | 0.698 | 3.551 | -1.985 |
| PCBP3                  | -0.266 | 0.831 | 3.438 | -0.970 |
| PCBP4                  | -0.644 | 0.640 | 6.528 | -2.203 |
| PCDH1                  | 0.248  | 1.188 | 5.224 | 1.165  |
| PCDH10                 | 0.444  | 1.360 | 6.956 | 1.627  |
| PCDH11Y//PCDH11X       | 0.477  | 1.392 | 3.810 | 0.787  |
| PCDH15                 | -0.302 | 0.811 | 4.540 | -0.996 |
| PCDH18                 | 0.051  | 1.036 | 5.650 | 0.214  |
| PCDH19                 | 0.772  | 1.708 | 4.385 | 1.762  |
| PCDH20//LOC101926951   | 0.434  | 1.351 | 2.132 | 1.594  |
| PCDH7                  | 0.831  | 1.778 | 5.994 | 2.301  |
| PCDH8                  | 1.318  | 2.492 | 4.683 | 2.051  |
| PCDH9                  | -0.223 | 0.857 | 8.556 | -0.888 |
| PCDHB10//PCDHB9        | 0.287  | 1.220 | 5.965 | 1.072  |

|                      |        |       |       |        |
|----------------------|--------|-------|-------|--------|
| PCDHB12              | 0.567  | 1.481 | 5.763 | 1.868  |
| PCDHB13              | 0.685  | 1.608 | 4.035 | 2.487  |
| PCDHB14              | 0.318  | 1.247 | 5.244 | 1.139  |
| PCDHB15              | 0.167  | 1.123 | 4.900 | 0.622  |
| PCDHB16              | -0.099 | 0.934 | 4.026 | -0.314 |
| PCDHB18              | 0.549  | 1.463 | 4.884 | 2.128  |
| PCDHB19P//AC005752.8 | 0.569  | 1.484 | 4.046 | 2.121  |
| PCDHB2               | 0.089  | 1.064 | 3.895 | 0.295  |
| PCDHB4               | 0.190  | 1.141 | 5.757 | 0.478  |
| PCDHB6               | 0.200  | 1.149 | 4.899 | 0.510  |
| PCDHB7               | 0.054  | 1.038 | 4.494 | 0.167  |
| PCDHB8               | 0.268  | 1.204 | 2.469 | 1.062  |
| PCDHB9               | 0.372  | 1.294 | 3.954 | 1.335  |
| PCDHGB8P             | -0.430 | 0.742 | 4.445 | -1.529 |
| PCDP1                | 0.600  | 1.516 | 5.094 | 2.220  |
| PCED1B-AS1           | -0.313 | 0.805 | 3.061 | -0.956 |
| PCK2                 | -0.143 | 0.905 | 2.665 | -0.553 |
| PCLO                 | 1.440  | 2.714 | 5.550 | 2.741  |
| PCMT1                | 0.317  | 1.246 | 6.088 | 1.575  |
| PCNXL2               | 0.548  | 1.463 | 6.861 | 2.368  |
| PCOLCE               | 0.305  | 1.236 | 3.768 | 1.169  |
| PCOLCE2              | 0.120  | 1.087 | 2.163 | 0.495  |
| PCP2                 | -0.007 | 0.995 | 2.198 | -0.025 |
| PCP4                 | 0.825  | 1.772 | 3.320 | 1.803  |
| PCP4L1               | 0.580  | 1.494 | 5.586 | 0.998  |
| PCSK1                | 1.560  | 2.949 | 4.771 | 2.622  |
| PCSK1N               | 0.276  | 1.211 | 6.031 | 1.001  |
| PCSK2                | 0.971  | 1.961 | 6.295 | 1.556  |
| PCSK6//LOC100507472  | -1.191 | 0.438 | 5.366 | -2.732 |
| PCTP                 | 0.753  | 1.686 | 2.114 | 2.870  |
| PCYOX1               | 0.222  | 1.166 | 6.597 | 1.112  |
| PCYOX1L              | 0.406  | 1.325 | 4.805 | 1.749  |
| PCYT1B               | 0.107  | 1.077 | 6.348 | 0.542  |
| PDCD1LG2             | -0.591 | 0.664 | 3.519 | -1.570 |
| PDCD6IPP2            | 0.529  | 1.443 | 3.951 | 1.972  |
| PDCL3P4              | -0.635 | 0.644 | 4.974 | -1.534 |
| PDDC1                | -0.300 | 0.812 | 5.715 | -1.406 |
| PDE10A               | 0.511  | 1.426 | 5.195 | 1.521  |
| PDE10A               | 0.319  | 1.247 | 2.309 | 1.238  |
| PDE1A                | 0.928  | 1.903 | 6.150 | 2.002  |
| PDE1B                | 1.045  | 2.064 | 5.742 | 2.510  |
| PDE1C                | -0.572 | 0.672 | 5.185 | -1.777 |
| PDE2A                | 1.150  | 2.220 | 4.025 | 2.483  |
| PDE3A                | -0.245 | 0.844 | 4.638 | -1.118 |
| PDE3B                | 0.313  | 1.242 | 4.734 | 1.139  |
| PDE4A                | 0.602  | 1.518 | 4.857 | 2.196  |
| PDE4B                | -0.420 | 0.748 | 5.436 | -1.859 |
| PDE4D                | 0.470  | 1.385 | 3.808 | 1.941  |
| PDE5A                | 0.425  | 1.343 | 3.565 | 1.265  |
| PDE6B                | -0.461 | 0.727 | 5.029 | -1.267 |

|                            |        |       |       |        |
|----------------------------|--------|-------|-------|--------|
| PDE7A                      | -0.059 | 0.960 | 4.594 | -0.252 |
| PDE7B                      | 0.009  | 1.006 | 6.531 | 0.034  |
| PDE8A                      | -0.769 | 0.587 | 6.457 | -2.359 |
| PDE8B                      | 0.354  | 1.278 | 6.706 | 1.496  |
| PDE9A                      | -0.735 | 0.601 | 4.952 | -3.118 |
| PDGFB                      | -0.438 | 0.738 | 4.511 | -1.677 |
| PDGFD                      | 0.060  | 1.043 | 3.514 | 0.116  |
| PDGFRA//FIP1L1             | -0.586 | 0.666 | 6.188 | -1.964 |
| PDGFRL                     | 0.172  | 1.127 | 4.380 | 0.543  |
| PDIA2                      | -0.822 | 0.566 | 4.901 | -1.604 |
| PDIA3P1                    | -0.385 | 0.766 | 5.860 | -1.170 |
| PDIA4                      | -0.750 | 0.595 | 5.913 | -2.626 |
| PDIK1L                     | 0.360  | 1.283 | 3.896 | 1.598  |
| PDK1                       | 0.155  | 1.113 | 6.183 | 0.497  |
| PDK3                       | 0.683  | 1.606 | 5.677 | 2.057  |
| PDK4                       | -0.938 | 0.522 | 7.349 | -2.637 |
| PDLIM1                     | 0.196  | 1.146 | 5.234 | 0.508  |
| PDLIM3                     | -0.593 | 0.663 | 4.492 | -2.545 |
| PDLIM4                     | -0.028 | 0.981 | 3.509 | -0.090 |
| PDLIM5                     | -0.244 | 0.844 | 4.853 | -1.088 |
| PDP1                       | 1.136  | 2.198 | 3.902 | 3.060  |
| PDP2                       | 0.129  | 1.093 | 4.663 | 0.556  |
| PDPK1//LOC101060747//PDPK2 | 0.274  | 1.209 | 7.401 | 1.322  |
| PDPN                       | -0.066 | 0.955 | 4.430 | -0.213 |
| PDPR                       | -0.715 | 0.609 | 6.211 | -2.825 |
| PDS5B                      | 0.657  | 1.577 | 7.555 | 2.598  |
| PDSS2                      | -0.213 | 0.863 | 2.575 | -0.773 |
| PDXP//SH3BP1               | 0.637  | 1.555 | 6.356 | 2.006  |
| PDYN                       | 0.189  | 1.140 | 2.232 | 0.548  |
| PDZD2                      | -0.045 | 0.969 | 5.387 | -0.186 |
| PDZD4                      | 0.962  | 1.948 | 6.296 | 2.588  |
| PDZD7                      | -0.116 | 0.923 | 3.307 | -0.411 |
| PDZRN3                     | 0.809  | 1.753 | 4.594 | 2.413  |
| PEBP4                      | -0.228 | 0.854 | 3.535 | -0.853 |
| PEG10                      | 0.076  | 1.054 | 7.631 | 0.238  |
| PEG3//ZIM2                 | 0.331  | 1.258 | 6.394 | 1.028  |
| PEG3-AS1                   | 0.289  | 1.222 | 3.791 | 0.961  |
| PELI1                      | -0.187 | 0.878 | 6.911 | -0.809 |
| PELI3                      | 0.442  | 1.359 | 4.937 | 2.057  |
| PENK                       | -0.735 | 0.601 | 2.500 | -1.716 |
| PER1//MIR6883              | -0.111 | 0.926 | 6.198 | -0.375 |
| PERP                       | 0.256  | 1.195 | 4.066 | 0.930  |
| PEX1                       | -0.105 | 0.930 | 5.884 | -0.391 |
| PEX10                      | 0.145  | 1.106 | 2.677 | 0.621  |
| PEX11B                     | 0.232  | 1.174 | 6.360 | 1.159  |
| PEX11G                     | -0.450 | 0.732 | 3.809 | -1.839 |
| PEX12                      | -0.431 | 0.742 | 5.098 | -1.873 |
| PEX5L                      | -0.046 | 0.969 | 7.577 | -0.213 |
| PEX5L-AS1                  | -0.020 | 0.986 | 3.351 | -0.072 |
| PFDN4                      | 0.300  | 1.231 | 4.745 | 1.341  |

|                                  |        |       |       |        |
|----------------------------------|--------|-------|-------|--------|
| PFKFB2                           | 0.332  | 1.258 | 5.900 | 1.167  |
| PFKFB3                           | 0.007  | 1.005 | 7.743 | 0.027  |
| PFKM                             | 0.516  | 1.430 | 4.389 | 2.126  |
| PFKP                             | 0.290  | 1.223 | 7.553 | 1.077  |
| PFN1                             | -0.333 | 0.794 | 8.636 | -1.547 |
| PFN2                             | 0.477  | 1.392 | 7.579 | 2.359  |
| PGAM2                            | -0.973 | 0.509 | 5.665 | -2.399 |
| PGAM4                            | -0.001 | 0.999 | 3.427 | -0.003 |
| PGAM5                            | 0.231  | 1.174 | 4.563 | 0.964  |
| PGAP1                            | -0.062 | 0.958 | 6.517 | -0.265 |
| PGAP3                            | -0.012 | 0.992 | 3.874 | -0.043 |
| PGBD2                            | -0.614 | 0.654 | 3.454 | -2.622 |
| PGBD4                            | 0.125  | 1.091 | 5.039 | 0.696  |
| PGBD5                            | 0.606  | 1.522 | 5.903 | 1.871  |
| PGLS                             | -0.388 | 0.764 | 4.735 | -1.534 |
| PGM2                             | -0.007 | 0.995 | 5.997 | -0.024 |
| PGM2L1                           | 1.547  | 2.923 | 6.009 | 2.975  |
| PGM5                             | -0.268 | 0.831 | 2.838 | -1.015 |
| PGP                              | 0.483  | 1.398 | 5.622 | 1.929  |
| PGPEP1//FKBP8                    | -0.285 | 0.821 | 6.079 | -1.471 |
| PHACTR1                          | 1.318  | 2.492 | 3.781 | 2.743  |
| PHACTR4                          | -0.587 | 0.666 | 6.690 | -2.634 |
| PHC1                             | -0.512 | 0.701 | 6.698 | -2.397 |
| PHC2                             | -0.267 | 0.831 | 5.607 | -1.152 |
| PHEX                             | -0.018 | 0.987 | 2.192 | -0.084 |
| PHF14                            | 0.195  | 1.144 | 5.993 | 0.979  |
| PHGDH                            | -0.568 | 0.674 | 5.797 | -2.304 |
| PHKA1                            | -0.200 | 0.871 | 5.378 | -0.826 |
| PHKA2                            | -0.537 | 0.689 | 5.451 | -2.187 |
| PHKG1                            | -0.184 | 0.880 | 3.822 | -0.610 |
| PHLDA3                           | -0.414 | 0.751 | 4.310 | -1.510 |
| PHLDB1//MIR6716                  | -0.810 | 0.570 | 4.335 | -2.494 |
| PHLDB2                           | 0.670  | 1.591 | 2.736 | 1.990  |
| PHLPP1                           | -0.736 | 0.600 | 8.135 | -2.854 |
| PHLPP2                           | 0.395  | 1.315 | 6.015 | 1.586  |
| PHOSPHO2-KLHL23//PHOSPHO2//KLHL2 | 0.015  | 1.010 | 3.960 | 0.061  |
| PHPT1                            | -0.376 | 0.770 | 4.991 | -1.814 |
| PHTF1                            | 0.446  | 1.363 | 4.752 | 1.936  |
| PHTF2                            | 0.128  | 1.093 | 5.028 | 0.572  |
| PHYHD1                           | -0.639 | 0.642 | 4.740 | -1.977 |
| PHYHIP                           | 1.482  | 2.793 | 6.339 | 2.637  |
| PHYHIPL                          | -0.404 | 0.756 | 7.626 | -1.454 |
| PHYKPL                           | -0.560 | 0.679 | 4.782 | -2.148 |
| PI15                             | 1.240  | 2.361 | 3.496 | 1.748  |
| PI16                             | -1.211 | 0.432 | 4.042 | -2.892 |
| PI4K2A//RP11-548K23.11           | 0.275  | 1.210 | 7.120 | 1.290  |
| PI4K2B//SEPSECS-AS1              | -0.984 | 0.506 | 4.245 | -3.193 |
| PI4K2B//SEPSECS-AS1              | -0.039 | 0.973 | 3.868 | -0.152 |
| PI4KA                            | 0.730  | 1.659 | 7.887 | 2.123  |
| PI4KA//PI4KAP2//PI4KAP1          | 0.614  | 1.530 | 6.586 | 2.011  |

|                                    |        |       |       |        |
|------------------------------------|--------|-------|-------|--------|
| PI4KA//PI4KAP2//PI4KAP1            | 0.552  | 1.466 | 7.818 | 1.598  |
| PIANP                              | 0.899  | 1.865 | 5.131 | 2.371  |
| PID1                               | 0.309  | 1.239 | 3.347 | 1.221  |
| PIEZO1                             | -0.568 | 0.674 | 5.055 | -2.026 |
| PIEZO2                             | -1.172 | 0.444 | 5.575 | -2.164 |
| PIFO                               | -0.124 | 0.917 | 3.851 | -0.405 |
| PIGBOS1//RP11-139H15.1             | 0.013  | 1.009 | 4.015 | 0.042  |
| PIGF                               | -0.478 | 0.718 | 4.116 | -1.809 |
| PIGM                               | -0.715 | 0.609 | 6.235 | -2.477 |
| PIGN                               | -0.258 | 0.836 | 5.822 | -0.937 |
| PIGT                               | -0.633 | 0.645 | 7.360 | -2.747 |
| PIGZ                               | 0.176  | 1.130 | 4.724 | 0.558  |
| PIH1D2                             | 0.253  | 1.191 | 2.286 | 1.007  |
| PIK3AP1                            | -0.131 | 0.913 | 5.456 | -0.374 |
| PIK3CA                             | 0.452  | 1.368 | 6.923 | 2.251  |
| PIK3CB                             | 0.261  | 1.198 | 6.144 | 1.359  |
| PIK3CG                             | 0.116  | 1.084 | 5.266 | 0.294  |
| PIK3R1                             | 0.334  | 1.260 | 8.515 | 1.616  |
| PIK3R2//AC007192.4                 | 0.427  | 1.344 | 5.379 | 1.947  |
| PIK3R3//LOC102724021//RP11-322N21. | 0.629  | 1.547 | 5.198 | 2.923  |
| PIK3R5                             | -0.808 | 0.571 | 3.804 | -3.182 |
| PIK3R6                             | -0.530 | 0.692 | 2.297 | -2.100 |
| PILRA                              | -0.412 | 0.752 | 2.913 | -1.544 |
| PIM1                               | 0.128  | 1.093 | 5.723 | 0.369  |
| PIM2                               | 0.352  | 1.277 | 4.277 | 1.325  |
| PIN4P1                             | -0.308 | 0.808 | 2.320 | -1.099 |
| PIP4K2A                            | -0.727 | 0.604 | 8.654 | -2.176 |
| PIP4K2B                            | 0.410  | 1.328 | 8.427 | 1.988  |
| PIP4K2C                            | 0.564  | 1.478 | 6.180 | 2.210  |
| PIP5K1B                            | 0.547  | 1.461 | 4.386 | 1.552  |
| PIP5K1C                            | 0.619  | 1.536 | 6.849 | 1.923  |
| PIPOX                              | 0.028  | 1.020 | 4.398 | 0.096  |
| PIR-FIGF//PIR//FIGF                | -0.286 | 0.820 | 3.658 | -0.963 |
| PIRT                               | -0.569 | 0.674 | 5.963 | -1.103 |
| PITPNB                             | 0.368  | 1.290 | 6.640 | 1.785  |
| PITPNM1                            | 0.748  | 1.679 | 5.408 | 2.411  |
| PITPNM2                            | 0.685  | 1.608 | 4.503 | 2.571  |
| PITPNM3                            | 1.695  | 3.238 | 4.607 | 2.894  |
| PITRM1-AS1                         | -0.066 | 0.955 | 2.376 | -0.264 |
| PIWIL4                             | -0.187 | 0.878 | 4.005 | -0.694 |
| PJA1                               | 0.183  | 1.135 | 5.579 | 0.801  |
| PJA2                               | 0.427  | 1.345 | 8.300 | 2.005  |
| PKDCC                              | 0.241  | 1.182 | 3.434 | 0.945  |
| PKI55//RP11-566E18.3               | 0.767  | 1.702 | 6.403 | 2.164  |
| PKIA                               | 0.458  | 1.374 | 5.417 | 1.850  |
| PKNOX2                             | 1.073  | 2.103 | 4.610 | 3.016  |
| PKP2                               | 0.674  | 1.596 | 4.346 | 1.136  |
| PKP4                               | -0.693 | 0.619 | 8.625 | -2.616 |
| PLA1A                              | 0.206  | 1.153 | 3.836 | 0.798  |
| PLA2G15                            | 0.199  | 1.148 | 5.215 | 0.686  |



|                          |        |       |       |        |
|--------------------------|--------|-------|-------|--------|
| PLA2G16                  | -0.899 | 0.536 | 8.115 | -3.068 |
| PLA2G4A                  | 0.240  | 1.181 | 4.853 | 0.814  |
| PLA2G4C                  | -0.584 | 0.667 | 5.388 | -1.945 |
| PLA2G4C                  | -0.307 | 0.808 | 3.619 | -1.014 |
| PLA2G7                   | 0.280  | 1.214 | 5.337 | 0.669  |
| PLA2R1                   | 0.304  | 1.235 | 3.553 | 0.793  |
| PLAC8                    | -0.333 | 0.794 | 4.058 | -0.750 |
| PLAGL1                   | 0.541  | 1.455 | 4.833 | 2.192  |
| PLAT                     | 0.374  | 1.296 | 5.926 | 1.337  |
| PLAU                     | -0.096 | 0.936 | 2.478 | -0.488 |
| PLAUR                    | 0.332  | 1.259 | 4.887 | 1.085  |
| PLBD1                    | 0.042  | 1.029 | 4.158 | 0.132  |
| PLCB1                    | 1.275  | 2.421 | 7.656 | 2.921  |
| PLCB1-IT1//LOC100128668  | 0.516  | 1.430 | 2.279 | 1.620  |
| PLCB2                    | -0.606 | 0.657 | 4.836 | -1.910 |
| PLCB3                    | -0.286 | 0.820 | 5.197 | -1.475 |
| PLCB4                    | -0.055 | 0.963 | 5.978 | -0.169 |
| PLCD1                    | -0.445 | 0.735 | 4.552 | -1.661 |
| PLCD3                    | -0.507 | 0.704 | 6.819 | -1.742 |
| PLCE1                    | 0.097  | 1.069 | 6.108 | 0.491  |
| PLCG2                    | -0.292 | 0.817 | 4.703 | -0.815 |
| PLCH1                    | 1.663  | 3.166 | 4.495 | 3.124  |
| PLCL1                    | -0.676 | 0.626 | 6.892 | -2.353 |
| PLCXD1                   | -0.073 | 0.951 | 4.545 | -0.218 |
| PLCXD3                   | 0.225  | 1.168 | 5.875 | 0.686  |
| PLD1                     | -1.081 | 0.473 | 6.126 | -3.047 |
| PLD2                     | -0.138 | 0.909 | 5.748 | -0.471 |
| PLD3                     | 0.279  | 1.213 | 6.278 | 1.288  |
| PLD4                     | -0.624 | 0.649 | 3.868 | -1.570 |
| PLD5                     | -0.260 | 0.835 | 5.293 | -0.991 |
| PLEC                     | -0.165 | 0.892 | 6.186 | -0.894 |
| PLEK                     | -0.398 | 0.759 | 4.310 | -0.972 |
| PLEKHA1                  | 0.471  | 1.386 | 6.403 | 2.011  |
| PLEKHA4                  | 0.125  | 1.090 | 3.902 | 0.384  |
| PLEKHA6                  | 0.306  | 1.236 | 6.913 | 1.143  |
| PLEKHA6                  | -0.062 | 0.958 | 3.356 | -0.232 |
| PLEKHA8P1//RP11-139E19.1 | 0.199  | 1.148 | 3.764 | 0.681  |
| PLEKHB1                  | -0.615 | 0.653 | 5.773 | -2.076 |
| PLEKHF1                  | -0.489 | 0.713 | 4.251 | -2.070 |
| PLEKHG1                  | -0.601 | 0.659 | 6.546 | -1.799 |
| PLEKHG2                  | 0.123  | 1.089 | 2.837 | 0.488  |
| PLEKHG3                  | -0.713 | 0.610 | 4.644 | -2.386 |
| PLEKHG5                  | 0.851  | 1.803 | 3.560 | 3.185  |
| PLEKHH1                  | -1.178 | 0.442 | 7.103 | -2.256 |
| PLEKHH2                  | -0.110 | 0.926 | 4.788 | -0.392 |
| PLEKHM2                  | 0.488  | 1.403 | 7.917 | 2.099  |
| PLEKHM3                  | 0.267  | 1.204 | 5.617 | 1.311  |
| PLEKHO2//AC069368.3      | -0.017 | 0.988 | 5.830 | -0.078 |
| PLIN1                    | -0.307 | 0.808 | 4.277 | -0.781 |
| PLIN2                    | -0.124 | 0.917 | 3.507 | -0.431 |

|                             |        |       |        |        |
|-----------------------------|--------|-------|--------|--------|
| PLIN3                       | -0.809 | 0.571 | 6.112  | -2.206 |
| PLIN4                       | -0.738 | 0.600 | 3.413  | -2.925 |
| PLK2                        | 1.574  | 2.977 | 4.106  | 3.033  |
| PLK3                        | -0.711 | 0.611 | 4.580  | -1.875 |
| PLK5                        | 0.229  | 1.172 | 2.928  | 0.801  |
| PLLP                        | -0.767 | 0.588 | 7.947  | -1.851 |
| PLN                         | 0.690  | 1.614 | 2.597  | 1.668  |
| PLOD1                       | -0.615 | 0.653 | 6.696  | -2.186 |
| PLOD2                       | 0.001  | 1.001 | 6.951  | 0.003  |
| PLOD3                       | -0.960 | 0.514 | 5.372  | -3.225 |
| PLP2                        | -0.293 | 0.816 | 5.579  | -1.002 |
| PLS1                        | 0.471  | 1.386 | 3.250  | 1.650  |
| PLSCR1                      | 0.385  | 1.306 | 5.563  | 1.006  |
| PLSCR4                      | 0.276  | 1.210 | 6.783  | 1.134  |
| PLTP                        | -0.177 | 0.884 | 8.217  | -0.633 |
| PLVAP                       | -0.010 | 0.993 | 3.041  | -0.026 |
| PLXDC1                      | 0.321  | 1.249 | 5.386  | 1.354  |
| PLXDC2                      | -0.585 | 0.667 | 9.067  | -2.367 |
| PLXDC2                      | -0.302 | 0.811 | 5.581  | -1.139 |
| PLXNA1                      | 0.339  | 1.265 | 5.629  | 1.282  |
| PLXNA2                      | 0.770  | 1.705 | 5.904  | 2.226  |
| PLXNA3                      | -0.214 | 0.862 | 4.653  | -0.938 |
| PLXNA4                      | 0.614  | 1.530 | 4.998  | 1.645  |
| PLXNB1                      | -0.632 | 0.645 | 6.289  | -2.347 |
| PLXNB2                      | -0.288 | 0.819 | 6.457  | -1.513 |
| PLXNB3                      | -1.082 | 0.472 | 5.231  | -3.124 |
| PLXND1                      | -0.387 | 0.765 | 5.652  | -1.651 |
| PMP2                        | -0.047 | 0.968 | 10.309 | -0.169 |
| PMP22                       | -0.714 | 0.610 | 6.682  | -2.364 |
| PMS2                        | 0.235  | 1.177 | 5.473  | 0.844  |
| PMS2CL                      | 0.067  | 1.047 | 5.408  | 0.256  |
| PMS2P1                      | -0.128 | 0.915 | 4.464  | -0.522 |
| PMS2P9                      | -0.392 | 0.762 | 3.262  | -1.188 |
| PNCK                        | 0.658  | 1.577 | 3.654  | 2.093  |
| PNKD                        | 0.149  | 1.109 | 4.545  | 0.605  |
| PNLDC1                      | 0.040  | 1.028 | 2.323  | 0.137  |
| PNMA1                       | 0.383  | 1.304 | 7.936  | 1.900  |
| PNMA2                       | 0.677  | 1.599 | 6.853  | 1.915  |
| PNMA3                       | 0.638  | 1.556 | 4.524  | 1.521  |
| PNMA5                       | 0.207  | 1.154 | 3.501  | 0.767  |
| PNMA6A//PNMA6C//PNMA6D      | 0.761  | 1.695 | 3.878  | 2.816  |
| PNMA6A//PNMA6C//PNMA6D      | 0.713  | 1.639 | 3.887  | 2.660  |
| PNMA6A//PNMA6C//PNMA6D      | 0.622  | 1.539 | 3.711  | 2.363  |
| PNMA6A//PNMA6C//PNMA6D      | 0.674  | 1.596 | 3.703  | 2.124  |
| PNMAL1                      | 0.669  | 1.589 | 6.083  | 2.018  |
| PNMAL2                      | 0.512  | 1.426 | 4.571  | 1.356  |
| PNOC                        | 0.145  | 1.106 | 3.003  | 0.418  |
| PNP                         | -0.005 | 0.997 | 4.669  | -0.017 |
| POC1B//POC1B-GALNT4//GALNT4 | -0.237 | 0.848 | 4.805  | -0.917 |
| PODN                        | 0.186  | 1.137 | 4.026  | 0.574  |

|                                      |        |       |       |        |
|--------------------------------------|--------|-------|-------|--------|
| PODNL1                               | -0.328 | 0.796 | 3.080 | -1.294 |
| PODXL2                               | 0.318  | 1.246 | 6.705 | 1.297  |
| POLD1                                | -0.087 | 0.942 | 3.264 | -0.364 |
| POLM                                 | -0.093 | 0.938 | 3.713 | -0.438 |
| POLR2B                               | 0.158  | 1.116 | 6.651 | 0.763  |
| POLR2G                               | -0.376 | 0.770 | 5.567 | -1.475 |
| POLR2L                               | -0.433 | 0.741 | 5.061 | -2.104 |
| POLR3A                               | 0.567  | 1.481 | 6.517 | 2.341  |
| POLR3B                               | 0.028  | 1.019 | 5.491 | 0.127  |
| POLR3F                               | 0.140  | 1.102 | 5.027 | 0.642  |
| POM121L10P                           | 0.282  | 1.216 | 2.287 | 0.979  |
| POM121L1P                            | 0.295  | 1.227 | 2.797 | 1.021  |
| POM121L8P                            | 0.503  | 1.417 | 2.745 | 1.988  |
| POM121L9P                            | -0.142 | 0.906 | 2.664 | -0.387 |
| POMGNT1                              | -0.324 | 0.799 | 6.458 | -1.476 |
| POMK//SGK196                         | 0.370  | 1.293 | 6.589 | 1.559  |
| POMZP3                               | -0.027 | 0.982 | 3.550 | -0.096 |
| PON3                                 | -0.228 | 0.854 | 2.880 | -0.771 |
| POPDC3                               | 0.229  | 1.172 | 4.515 | 0.955  |
| PORCN                                | 0.333  | 1.259 | 5.479 | 1.459  |
| POSTN                                | 0.475  | 1.390 | 2.993 | 1.088  |
| POTEF                                | 0.313  | 1.242 | 3.033 | 1.019  |
| POU3F1                               | 0.276  | 1.211 | 3.115 | 1.000  |
| POU3F2                               | -0.489 | 0.713 | 6.224 | -2.180 |
| POU4F1                               | -0.618 | 0.652 | 2.841 | -1.325 |
| POU5F1P4                             | 0.251  | 1.190 | 3.612 | 0.892  |
| POU5F2                               | -0.146 | 0.904 | 2.546 | -0.513 |
| POU6F1                               | 0.304  | 1.235 | 5.864 | 1.298  |
| POU6F2                               | 0.624  | 1.542 | 3.291 | 2.064  |
| PP12613                              | 0.794  | 1.734 | 1.668 | 2.276  |
| PP13                                 | -0.116 | 0.923 | 3.031 | -0.253 |
| PP13                                 | 0.031  | 1.021 | 3.036 | 0.112  |
| PP13439                              | -1.150 | 0.451 | 2.973 | -3.154 |
| PPAP2C                               | -1.341 | 0.395 | 6.575 | -3.586 |
| PPAPDC1A                             | -1.154 | 0.449 | 6.322 | -3.754 |
| PPAPDC2                              | 0.309  | 1.239 | 3.394 | 1.608  |
| PPARGC1A                             | 0.517  | 1.431 | 3.367 | 2.149  |
| PPARGC1B                             | 0.303  | 1.234 | 2.893 | 1.293  |
| PPAT                                 | 0.413  | 1.332 | 4.436 | 1.790  |
| PPBP                                 | -0.011 | 0.993 | 2.319 | -0.016 |
| PPDPF                                | -0.848 | 0.556 | 7.126 | -2.751 |
| PPEF1                                | 0.049  | 1.034 | 4.565 | 0.091  |
| PPFIA2                               | 0.656  | 1.575 | 7.134 | 2.293  |
| PPFIA3                               | 0.818  | 1.763 | 3.806 | 2.504  |
| PPFIA4                               | 0.904  | 1.871 | 4.317 | 2.140  |
| PPFIBP1                              | 0.569  | 1.483 | 6.751 | 2.494  |
| PPFIBP2                              | -0.741 | 0.598 | 4.726 | -2.823 |
| PPIAL4B                              | 0.460  | 1.376 | 2.352 | 1.396  |
| PPIAL4B//PPIAL4C//PPIAL4D//PPIAL4F// | 0.158  | 1.116 | 3.043 | 0.640  |
| PPIAL4B//PPIAL4C//PPIAL4E            | -0.034 | 0.977 | 2.333 | -0.090 |

|                                   |        |       |       |        |
|-----------------------------------|--------|-------|-------|--------|
| PPIAP30                           | 0.234  | 1.176 | 3.162 | 0.799  |
| PPID                              | 0.287  | 1.220 | 6.272 | 1.034  |
| PPIL6                             | 0.580  | 1.494 | 3.928 | 2.611  |
| PPIP5K1                           | -0.157 | 0.897 | 3.775 | -0.585 |
| PPIP5K1//AC011330.5               | 0.404  | 1.323 | 6.998 | 1.688  |
| PPIP5K1//LOC100508782//AC011330.5 | 0.459  | 1.374 | 5.215 | 2.089  |
| PPIP5K1//LOC100508782//AC011330.5 | 0.422  | 1.340 | 6.794 | 1.846  |
| PPIP5K1//LOC100508782//AC011330.5 | 0.399  | 1.319 | 6.517 | 1.755  |
| PPIP5K1//LOC100508782//AC011330.5 | 0.335  | 1.262 | 5.831 | 1.751  |
| PPIP5K1//LOC100508782//AC011330.5 | 0.358  | 1.282 | 7.149 | 1.512  |
| PPIP5K1//LOC100508782//AC011330.5 | 0.300  | 1.231 | 5.874 | 1.501  |
| PPIP5K1//LOC100508782//AC011330.5 | 0.621  | 1.538 | 4.568 | 1.452  |
| PPIP5K1//LOC100508782//AC011330.5 | 0.377  | 1.298 | 3.485 | 1.443  |
| PPIP5K1//LOC100508782//AC011330.5 | 0.293  | 1.225 | 6.429 | 1.348  |
| PPIP5K1//LOC100508782//AC011330.5 | 0.278  | 1.213 | 6.490 | 1.338  |
| PPIP5K1//LOC100508782//AC011330.5 | 0.292  | 1.225 | 8.357 | 1.303  |
| PPIP5K1//LOC100508782//AC011330.5 | 0.296  | 1.228 | 7.854 | 1.141  |
| PPIP5K1//LOC100508782//AC011330.5 | 0.247  | 1.187 | 7.629 | 1.034  |
| PPIP5K1//LOC100508782//AC011330.5 | 0.225  | 1.169 | 7.578 | 0.955  |
| PPIP5K2                           | 0.149  | 1.109 | 5.986 | 0.630  |
| PPL                               | 1.415  | 2.667 | 3.431 | 3.685  |
| PPM1E                             | 0.705  | 1.630 | 4.195 | 1.906  |
| PPM1H                             | 0.014  | 1.009 | 6.067 | 0.066  |
| PPM1J                             | 0.994  | 1.991 | 3.071 | 3.555  |
| PPM1K                             | 0.228  | 1.171 | 7.058 | 0.929  |
| PPM1L                             | 0.489  | 1.404 | 5.025 | 2.300  |
| PPME1                             | 0.451  | 1.367 | 6.340 | 2.014  |
| PPP1R12A                          | 0.557  | 1.471 | 6.518 | 2.745  |
| PPP1R13B                          | 0.351  | 1.276 | 5.191 | 1.427  |
| PPP1R13L                          | -0.357 | 0.781 | 3.794 | -1.307 |
| PPP1R14A                          | -0.894 | 0.538 | 5.766 | -1.879 |
| PPP1R14C                          | 0.691  | 1.615 | 3.662 | 1.600  |
| PPP1R15A                          | 0.074  | 1.052 | 4.514 | 0.237  |
| PPP1R16B                          | 0.221  | 1.166 | 6.901 | 0.793  |
| PPP1R18                           | -0.298 | 0.814 | 4.659 | -1.110 |
| PPP1R18                           | -0.261 | 0.834 | 4.731 | -1.067 |
| PPP1R18                           | -0.250 | 0.841 | 4.674 | -0.962 |
| PPP1R18                           | -0.186 | 0.879 | 5.700 | -0.796 |
| PPP1R18                           | -0.111 | 0.926 | 4.626 | -0.412 |
| PPP1R1A                           | 0.432  | 1.349 | 5.837 | 1.438  |
| PPP1R1B                           | 0.137  | 1.100 | 5.467 | 0.462  |
| PPP1R1C                           | -0.220 | 0.858 | 3.303 | -0.821 |
| PPP1R32                           | -0.217 | 0.860 | 3.755 | -0.771 |
| PPP1R3B                           | -0.123 | 0.919 | 2.939 | -0.425 |
| PPP1R3C                           | -0.248 | 0.842 | 7.013 | -0.939 |
| PPP1R9A                           | 0.352  | 1.276 | 6.638 | 1.870  |
| PPP1R9B                           | 0.693  | 1.617 | 7.080 | 2.689  |
| PPP2R2B//RNA5SP196                | 0.510  | 1.424 | 6.441 | 1.294  |
| PPP2R2B-IT1                       | -1.120 | 0.460 | 4.537 | -2.158 |
| PPP2R3A                           | -0.296 | 0.814 | 5.188 | -1.082 |

|                           |        |       |       |        |
|---------------------------|--------|-------|-------|--------|
| PPP2R3B//LOC102725016     | -0.459 | 0.728 | 3.544 | -1.995 |
| PPP2R5D                   | 0.479  | 1.393 | 6.099 | 2.250  |
| PPP2R5E                   | 0.378  | 1.299 | 6.618 | 1.915  |
| PPP3CA                    | 1.095  | 2.135 | 8.269 | 2.842  |
| PPP3CB                    | 0.665  | 1.586 | 6.532 | 2.538  |
| PPP3CB-AS1//RP11-137L10.6 | -0.512 | 0.701 | 3.522 | -2.538 |
| PPP3R1//RP11-474G23.1     | 0.836  | 1.786 | 7.987 | 2.650  |
| PPP4R1L                   | -0.413 | 0.751 | 2.651 | -1.360 |
| PPP4R4                    | 0.822  | 1.767 | 5.132 | 2.302  |
| PPP5D1                    | -0.090 | 0.940 | 2.663 | -0.305 |
| PPTC7                     | 0.375  | 1.297 | 5.526 | 1.445  |
| PPWD1                     | -0.196 | 0.873 | 5.865 | -0.698 |
| PQLC3                     | -0.396 | 0.760 | 4.725 | -1.472 |
| PRAM1                     | -1.014 | 0.495 | 3.549 | -2.865 |
| PRB1                      | 0.902  | 1.869 | 3.993 | 3.306  |
| PRB2                      | 0.306  | 1.236 | 2.939 | 0.792  |
| PRC1                      | 0.321  | 1.249 | 4.384 | 1.188  |
| PRDM1                     | -0.005 | 0.997 | 3.686 | -0.015 |
| PRDM10                    | 0.187  | 1.138 | 5.314 | 0.924  |
| PRDM11//LOC101060179      | 0.082  | 1.059 | 3.833 | 0.298  |
| PRDM2                     | 0.212  | 1.159 | 5.909 | 1.088  |
| PRDM4                     | 0.169  | 1.124 | 5.305 | 0.773  |
| PRDM5                     | -0.337 | 0.792 | 4.674 | -1.252 |
| PRDM6                     | 0.342  | 1.268 | 2.802 | 1.403  |
| PRDM8                     | 0.804  | 1.746 | 4.195 | 2.865  |
| PRELP                     | 0.252  | 1.191 | 5.301 | 0.587  |
| PREP                      | 0.615  | 1.531 | 5.925 | 2.609  |
| PREPL                     | 0.459  | 1.375 | 8.870 | 1.951  |
| PREX1                     | -0.677 | 0.625 | 7.450 | -2.458 |
| PRF1                      | -0.396 | 0.760 | 2.171 | -1.222 |
| PRG4                      | 0.169  | 1.125 | 1.728 | 0.253  |
| PRICKLE1                  | 0.842  | 1.793 | 5.480 | 2.280  |
| PRICKLE2                  | 0.770  | 1.706 | 6.921 | 2.621  |
| PRICKLE4//TOMM6           | -0.410 | 0.753 | 2.844 | -1.363 |
| PRIMA1                    | -1.750 | 0.297 | 4.914 | -3.830 |
| PRKAA2                    | 0.650  | 1.569 | 5.653 | 1.887  |
| PRKACB                    | 0.193  | 1.143 | 7.585 | 1.063  |
| PRKAG2-AS1                | 0.515  | 1.429 | 2.667 | 1.734  |
| PRKAR1B                   | 0.943  | 1.923 | 5.512 | 2.307  |
| PRKAR1B                   | 0.372  | 1.294 | 3.052 | 1.302  |
| PRKAR2B                   | 1.173  | 2.255 | 6.204 | 3.105  |
| PRKCB                     | 1.125  | 2.181 | 5.200 | 3.180  |
| PRKCDBP                   | -0.203 | 0.869 | 3.461 | -0.805 |
| PRKCE                     | 0.834  | 1.783 | 4.428 | 2.521  |
| PRKCG                     | 2.406  | 5.302 | 4.438 | 3.183  |
| PRKCI                     | 0.400  | 1.320 | 6.028 | 1.704  |
| PRKCQ                     | -0.092 | 0.938 | 4.462 | -0.307 |
| PRKCQ-AS1                 | -0.495 | 0.710 | 2.816 | -1.522 |
| PRKCSH                    | -0.307 | 0.808 | 8.186 | -1.526 |
| PRKD1                     | -0.232 | 0.851 | 4.640 | -1.221 |

|                              |        |       |       |        |
|------------------------------|--------|-------|-------|--------|
| PRKD3                        | -0.356 | 0.782 | 4.874 | -1.283 |
| PRKG2                        | 0.543  | 1.457 | 3.376 | 1.798  |
| PRKX                         | -1.018 | 0.494 | 4.381 | -2.241 |
| PRKXP1//RNU6-322P            | -0.579 | 0.669 | 2.902 | -1.145 |
| PRKY                         | -0.052 | 0.965 | 3.151 | -0.121 |
| PRLR                         | 0.144  | 1.105 | 1.924 | 0.414  |
| PRMT6                        | -0.435 | 0.740 | 3.811 | -1.687 |
| PRMT8                        | 1.263  | 2.400 | 4.280 | 2.923  |
| PROCR                        | 0.015  | 1.010 | 4.467 | 0.053  |
| PRODH//LOC102724788          | 0.063  | 1.045 | 4.718 | 0.217  |
| PROK2                        | 0.411  | 1.330 | 2.749 | 0.909  |
| PROKR2                       | 1.028  | 2.039 | 2.847 | 2.600  |
| PRORS1P                      | 0.247  | 1.187 | 2.254 | 1.071  |
| PROS1                        | 0.533  | 1.447 | 4.992 | 1.902  |
| PRPF19                       | 0.341  | 1.267 | 6.646 | 1.580  |
| PRPH                         | -0.492 | 0.711 | 2.647 | -0.974 |
| PRPH2                        | 0.015  | 1.010 | 3.298 | 0.039  |
| PRPS2                        | 0.841  | 1.791 | 6.775 | 2.680  |
| PRR11                        | -0.197 | 0.872 | 3.262 | -0.737 |
| PRR16                        | -0.115 | 0.923 | 3.028 | -0.470 |
| PRR18                        | -0.549 | 0.684 | 5.256 | -1.406 |
| PRR24                        | 0.234  | 1.176 | 5.053 | 0.783  |
| PRR34-AS1//RP6-109B7.3       | -0.618 | 0.651 | 4.399 | -2.333 |
| PRR5L                        | -1.166 | 0.446 | 3.761 | -3.338 |
| PRRG1                        | -0.577 | 0.670 | 6.442 | -1.978 |
| PRRG3                        | 1.054  | 2.076 | 3.256 | 2.404  |
| PRRG4                        | -0.525 | 0.695 | 3.595 | -1.338 |
| PRRT1//LOC100507547          | 0.285  | 1.219 | 3.736 | 1.069  |
| PRRT1//LOC100507547          | 0.096  | 1.069 | 3.862 | 0.391  |
| PRRT1//LOC100507547          | 0.076  | 1.054 | 3.995 | 0.307  |
| PRRT2                        | 0.895  | 1.859 | 4.365 | 2.313  |
| PRRT3                        | 0.595  | 1.510 | 4.499 | 1.860  |
| PRRT3-AS1                    | -0.641 | 0.641 | 4.230 | -2.382 |
| PRRX1                        | -0.015 | 0.990 | 4.782 | -0.054 |
| PRSS12                       | 0.821  | 1.766 | 2.768 | 2.879  |
| PRSS23                       | 0.448  | 1.364 | 3.071 | 1.832  |
| PRSS23//CTD-2005H7.1         | -0.571 | 0.673 | 2.187 | -2.050 |
| PRSS35                       | 0.425  | 1.343 | 2.682 | 1.765  |
| PRTFDC1                      | -0.457 | 0.728 | 6.574 | -1.803 |
| PRTG                         | -0.991 | 0.503 | 4.316 | -2.296 |
| PRX                          | -0.103 | 0.931 | 3.248 | -0.198 |
| PSD                          | 1.007  | 2.009 | 4.907 | 2.413  |
| PSD2                         | -0.112 | 0.925 | 7.183 | -0.320 |
| PSD4                         | -0.402 | 0.757 | 2.883 | -1.404 |
| PSEN1                        | -0.709 | 0.612 | 5.136 | -2.478 |
| PSMB10//CTC-479C5.12         | -0.248 | 0.842 | 5.007 | -1.207 |
| PSMB8                        | 0.308  | 1.238 | 5.435 | 1.213  |
| PSMB8                        | 0.309  | 1.239 | 5.437 | 1.192  |
| PSMB8-AS1//XXbac-BPG246D15.8 | -0.076 | 0.949 | 3.556 | -0.345 |
| PSMB9                        | -0.318 | 0.802 | 2.690 | -1.717 |

|                                   |        |       |       |        |
|-----------------------------------|--------|-------|-------|--------|
| PSMB9                             | -0.238 | 0.848 | 3.032 | -1.206 |
| PSMB9                             | -0.147 | 0.903 | 3.488 | -0.681 |
| PSMB9//PSMB8-AS1//XXbac-BPG246D1  | -0.202 | 0.870 | 3.669 | -1.021 |
| PSMB9//PSMB8-AS1//XXbac-BPG246D1  | -0.116 | 0.922 | 3.442 | -0.557 |
| PSMD12                            | 0.494  | 1.408 | 7.240 | 2.279  |
| PSMD3                             | -0.008 | 0.994 | 3.542 | -0.028 |
| PSMD5                             | 0.096  | 1.069 | 5.263 | 0.459  |
| PSMD5-AS1                         | -0.206 | 0.867 | 4.894 | -0.556 |
| PSMG3                             | 0.216  | 1.162 | 5.727 | 0.905  |
| PSRC1                             | -0.431 | 0.742 | 4.851 | -1.543 |
| PSTPIP2                           | 0.118  | 1.085 | 3.903 | 0.403  |
| PTAFR                             | -0.730 | 0.603 | 3.651 | -2.044 |
| PTBP1//MIR4745                    | -0.361 | 0.779 | 7.309 | -1.656 |
| PTCH1                             | -0.457 | 0.728 | 4.978 | -1.752 |
| PTCH2                             | -0.137 | 0.909 | 3.455 | -0.475 |
| PTCHD1                            | 0.474  | 1.389 | 5.300 | 1.730  |
| PTCHD2                            | -0.241 | 0.846 | 3.269 | -0.934 |
| PTCHD4                            | 0.769  | 1.704 | 3.799 | 2.122  |
| PTCRA                             | -0.154 | 0.899 | 2.835 | -0.582 |
| PTDSS1                            | 0.433  | 1.350 | 6.781 | 1.758  |
| PTGDR                             | -0.460 | 0.727 | 2.661 | -0.920 |
| PTGDS                             | -0.399 | 0.758 | 8.315 | -1.819 |
| PTGER4                            | -0.672 | 0.628 | 2.435 | -2.002 |
| PTGES                             | -0.276 | 0.826 | 2.703 | -0.966 |
| PTGES3L-AARSD1//PTGES3L//AARSD1   | 0.211  | 1.157 | 3.755 | 0.941  |
| PTGFRN                            | 0.406  | 1.325 | 5.548 | 1.493  |
| PTGIS                             | 0.319  | 1.248 | 3.346 | 1.235  |
| PTGR1                             | 0.442  | 1.359 | 6.451 | 1.608  |
| PTGS1                             | -0.879 | 0.544 | 3.752 | -2.434 |
| PTGS2                             | 0.898  | 1.863 | 4.117 | 2.427  |
| PTH1R                             | -0.245 | 0.844 | 3.848 | -1.132 |
| PTH2R                             | 1.269  | 2.409 | 2.483 | 3.268  |
| PTK2B                             | 1.484  | 2.797 | 5.771 | 3.091  |
| PTMA//MIR1244-1//MIR1244-2//MIR12 | -0.385 | 0.766 | 5.709 | -1.182 |
| PTMS                              | 0.612  | 1.528 | 5.606 | 1.879  |
| PTN                               | 0.725  | 1.653 | 4.868 | 3.001  |
| PTN                               | 0.425  | 1.342 | 8.215 | 1.818  |
| PTP4A3                            | 0.646  | 1.565 | 5.690 | 2.247  |
| PTPLAD2                           | -0.261 | 0.834 | 3.380 | -0.999 |
| PTPN2                             | 0.235  | 1.177 | 4.893 | 0.947  |
| PTPN20B//PTPN20A                  | 0.335  | 1.262 | 2.836 | 0.889  |
| PTPN3                             | 1.032  | 2.045 | 3.842 | 2.180  |
| PTPN4                             | 0.627  | 1.545 | 5.781 | 2.590  |
| PTPN5                             | 1.268  | 2.408 | 5.503 | 2.190  |
| PTPN6                             | -0.468 | 0.723 | 4.696 | -1.579 |
| PTPRC                             | -0.539 | 0.688 | 5.689 | -1.363 |
| PTPRCAP                           | -0.405 | 0.755 | 3.262 | -1.688 |
| PTPRD                             | -0.242 | 0.845 | 7.632 | -1.007 |
| PTPRD-AS1//RP11-75C9.1            | -0.606 | 0.657 | 4.391 | -1.972 |
| PTPRD-AS2//RP11-87N24.2           | 0.846  | 1.797 | 2.156 | 3.226  |

|                                 |        |       |       |        |
|---------------------------------|--------|-------|-------|--------|
| PTPRH                           | -0.755 | 0.593 | 3.295 | -1.953 |
| PTPRJ                           | -0.127 | 0.915 | 6.406 | -0.607 |
| PTPRK                           | 0.188  | 1.139 | 6.761 | 0.904  |
| PTPRM                           | 0.371  | 1.293 | 7.264 | 1.580  |
| PTPRN                           | 1.018  | 2.024 | 5.566 | 2.201  |
| PTPRN2                          | 1.335  | 2.523 | 5.717 | 2.820  |
| PTPRO                           | 0.668  | 1.589 | 4.514 | 1.838  |
| PTPRR                           | 1.054  | 2.076 | 3.514 | 2.347  |
| PTPRT                           | 1.469  | 2.769 | 5.690 | 2.629  |
| PTRF                            | -0.511 | 0.702 | 5.538 | -1.830 |
| PTTG1IP                         | -0.043 | 0.971 | 7.292 | -0.179 |
| PTTG2                           | -0.241 | 0.846 | 3.064 | -0.846 |
| PURB//MIR4657                   | 0.349  | 1.274 | 5.926 | 1.628  |
| PURG                            | 0.414  | 1.332 | 5.100 | 1.845  |
| PUS10                           | -0.211 | 0.864 | 4.149 | -0.846 |
| PUS7                            | 0.386  | 1.306 | 4.302 | 1.973  |
| PUS7L                           | 0.141  | 1.102 | 5.374 | 0.541  |
| PVALB                           | 0.532  | 1.446 | 3.301 | 1.226  |
| PVR                             | 0.176  | 1.130 | 5.585 | 0.744  |
| PVRL2                           | 0.406  | 1.325 | 3.901 | 1.875  |
| PWAR1                           | 0.745  | 1.675 | 5.322 | 1.627  |
| PWAR4//SNORD115-23              | 0.713  | 1.639 | 2.247 | 2.614  |
| PWAR5                           | 0.505  | 1.419 | 8.716 | 1.716  |
| PWARSN//IPW//SNORD107//SNORD116 | 0.375  | 1.297 | 8.053 | 1.187  |
| PWP2                            | -0.385 | 0.766 | 4.694 | -1.410 |
| PXDC1                           | 0.163  | 1.119 | 5.981 | 0.731  |
| PXDN                            | -0.211 | 0.864 | 3.917 | -0.761 |
| PXK                             | -0.916 | 0.530 | 8.100 | -2.811 |
| PXN                             | -0.402 | 0.757 | 4.234 | -1.975 |
| PYCARD                          | -0.466 | 0.724 | 3.423 | -1.010 |
| PYCR1                           | -0.478 | 0.718 | 3.594 | -2.034 |
| PYCR2//MIR6741//RP4-559A3.7     | -0.493 | 0.710 | 4.469 | -2.186 |
| PYGL                            | -0.127 | 0.915 | 4.940 | -0.343 |
| PYGM                            | -0.359 | 0.780 | 5.251 | -0.779 |
| PYROXD2//MIR1287                | -0.754 | 0.593 | 3.892 | -2.794 |
| PYY2                            | 0.050  | 1.035 | 2.527 | 0.160  |
| QDPR                            | -0.455 | 0.729 | 8.226 | -1.723 |
| QKI                             | -0.819 | 0.567 | 8.957 | -2.883 |
| QPCT                            | 0.305  | 1.235 | 3.852 | 1.214  |
| QPRT//LOC101929880              | 0.264  | 1.201 | 5.334 | 0.893  |
| QRICH2                          | 0.020  | 1.014 | 3.896 | 0.067  |
| QRSL1                           | -0.086 | 0.942 | 5.665 | -0.339 |
| QSOX1//FLJ23867                 | -0.018 | 0.988 | 5.413 | -0.078 |
| R3HCC1                          | -0.648 | 0.638 | 5.193 | -2.535 |
| R3HDM1                          | 0.952  | 1.935 | 7.477 | 2.623  |
| RAB11B-AS1//RP11-886P16.3       | -0.693 | 0.619 | 3.736 | -1.872 |
| RAB11FIP1                       | 0.204  | 1.152 | 2.419 | 0.821  |
| RAB11FIP2                       | 0.435  | 1.352 | 7.299 | 2.026  |
| RAB11FIP4                       | 0.142  | 1.104 | 7.574 | 0.726  |
| RAB11FIP5                       | 0.453  | 1.369 | 4.112 | 1.733  |



|                                    |        |       |       |        |
|------------------------------------|--------|-------|-------|--------|
| RAB13                              | -0.092 | 0.938 | 4.147 | -0.369 |
| RAB15                              | 0.861  | 1.816 | 4.674 | 2.126  |
| RAB20                              | 0.191  | 1.141 | 4.510 | 0.701  |
| RAB24//MXD3                        | 0.372  | 1.294 | 4.768 | 1.953  |
| RAB26                              | 1.143  | 2.209 | 4.764 | 2.963  |
| RAB27A                             | 0.212  | 1.158 | 4.424 | 0.766  |
| RAB27B                             | 1.440  | 2.713 | 5.397 | 2.452  |
| RAB29//RAB7L1                      | -0.051 | 0.965 | 6.018 | -0.241 |
| RAB32                              | -0.258 | 0.836 | 3.510 | -0.936 |
| RAB34//NARR                        | -0.167 | 0.891 | 3.940 | -0.771 |
| RAB37                              | 0.488  | 1.402 | 2.426 | 1.990  |
| RAB39A                             | 0.233  | 1.175 | 4.287 | 0.690  |
| RAB39B                             | 0.279  | 1.213 | 5.793 | 1.130  |
| RAB3A                              | 0.851  | 1.804 | 5.719 | 2.014  |
| RAB3B                              | 0.498  | 1.412 | 4.672 | 0.889  |
| RAB3C                              | 0.786  | 1.725 | 4.747 | 1.511  |
| RAB3D                              | 0.066  | 1.047 | 5.540 | 0.228  |
| RAB3GAP1                           | 0.370  | 1.292 | 7.380 | 2.135  |
| RAB3IL1                            | -0.009 | 0.994 | 3.873 | -0.037 |
| RAB40A                             | 0.122  | 1.088 | 2.978 | 0.514  |
| RAB40C                             | 0.452  | 1.368 | 4.864 | 1.999  |
| RAB42                              | -0.127 | 0.916 | 2.094 | -0.264 |
| RAB4A//SPHAR                       | 0.199  | 1.148 | 6.575 | 1.045  |
| RAB6A//WTH3DI                      | 0.268  | 1.204 | 8.834 | 1.410  |
| RAB6B                              | 0.826  | 1.772 | 8.299 | 2.127  |
| RAB6C-AS1//AC079776.7              | -0.090 | 0.940 | 4.967 | -0.197 |
| RAB9B                              | 0.305  | 1.235 | 4.520 | 0.858  |
| RAC3                               | 0.233  | 1.175 | 4.240 | 0.797  |
| RAD1                               | 0.392  | 1.312 | 4.093 | 1.598  |
| RAD50                              | 0.171  | 1.126 | 7.479 | 0.735  |
| RAD51-AS1                          | -0.569 | 0.674 | 4.236 | -1.968 |
| RAD51C                             | 0.367  | 1.289 | 4.848 | 1.650  |
| RAD51D                             | 0.113  | 1.081 | 5.487 | 0.402  |
| RAD54B//FSBP                       | 0.355  | 1.279 | 4.355 | 1.613  |
| RAE1                               | 0.234  | 1.176 | 4.345 | 1.124  |
| RAET1E-AS1//RP11-244K5.1//RP11-244 | -0.148 | 0.902 | 2.742 | -0.593 |
| RAI14                              | -0.512 | 0.701 | 4.144 | -2.139 |
| RAI2                               | 0.449  | 1.365 | 3.544 | 1.843  |
| RALB                               | 0.605  | 1.521 | 6.562 | 2.610  |
| RALGDS                             | -0.370 | 0.774 | 7.680 | -1.344 |
| RALYL                              | 0.910  | 1.879 | 4.775 | 2.349  |
| RAMP1                              | -0.066 | 0.955 | 5.427 | -0.299 |
| RAMP2                              | -0.349 | 0.785 | 5.062 | -0.931 |
| RAMP2-AS1//CTD-3193K9.7            | -0.367 | 0.776 | 4.457 | -1.676 |
| RAMP3                              | 0.053  | 1.037 | 4.898 | 0.131  |
| RANBP3L                            | 0.627  | 1.544 | 7.651 | 1.692  |
| RANBP6                             | 0.270  | 1.206 | 6.146 | 1.153  |
| RAP1B                              | 0.223  | 1.167 | 4.045 | 0.780  |
| RAP1GAP                            | 1.111  | 2.161 | 5.508 | 2.809  |
| RAP1GAP2                           | 1.074  | 2.105 | 5.226 | 2.215  |

|                                    |        |       |       |        |
|------------------------------------|--------|-------|-------|--------|
| RAP2A                              | 0.326  | 1.253 | 7.551 | 1.460  |
| RAP2B                              | 0.357  | 1.281 | 4.612 | 1.327  |
| RAPGEF2                            | 0.493  | 1.407 | 6.894 | 2.122  |
| RAPGEF4                            | 1.143  | 2.208 | 6.815 | 2.700  |
| RAPGEF4-AS1                        | 0.505  | 1.419 | 2.328 | 1.642  |
| RAPGEFL1                           | 0.902  | 1.869 | 3.855 | 2.120  |
| RAPH1                              | 0.400  | 1.320 | 6.285 | 1.662  |
| RARA//BCOR                         | 0.608  | 1.525 | 3.954 | 2.374  |
| RARB                               | 0.610  | 1.526 | 4.246 | 1.643  |
| RARG                               | -0.051 | 0.965 | 3.036 | -0.192 |
| RARRES2                            | -0.327 | 0.797 | 5.083 | -1.722 |
| RARRES3                            | -0.424 | 0.745 | 4.875 | -1.330 |
| RASA1                              | 0.384  | 1.305 | 6.932 | 2.041  |
| RASA2                              | 0.329  | 1.256 | 4.989 | 1.455  |
| RASA4//RASA4B                      | -0.231 | 0.852 | 3.672 | -0.741 |
| RASA4//RASA4B//AC004985.12//RP11-5 | -0.109 | 0.927 | 4.878 | -0.430 |
| RASA4//RASA4B//LOC102725198//RASA  | 0.010  | 1.007 | 5.163 | 0.039  |
| RASA4//RASA4B//POLR2J4//AC004985.1 | -0.261 | 0.834 | 7.582 | -0.928 |
| RASA4//RASA4B//POLR2J4//AC004985.1 | -0.146 | 0.904 | 5.453 | -0.589 |
| RASA4//RASA4B//RASA4CP//LOC102725  | -0.071 | 0.952 | 6.278 | -0.267 |
| RASA4//RASA4B//RASA4CP//LOC102725  | 0.159  | 1.117 | 6.159 | 0.607  |
| RASA4//RASA4B//RP11-514P8.6//RP11- | -0.221 | 0.858 | 7.907 | -0.767 |
| RASA4//RASA4B//RP11-514P8.6//RP11- | -0.084 | 0.944 | 6.173 | -0.322 |
| RASA4//RASA4B//RP11-514P8.6//RP11- | -0.260 | 0.835 | 5.841 | -1.125 |
| RASA4//RASA4CP//LOC102725198//RASA | -0.070 | 0.952 | 6.574 | -0.237 |
| RASA4B//RASA4                      | -0.132 | 0.913 | 3.954 | -0.357 |
| RASA4B//RASA4                      | -0.081 | 0.945 | 4.296 | -0.274 |
| RASA4B//RASA4//RP11-514P8.8//RASA  | -0.150 | 0.901 | 6.560 | -0.521 |
| RASAL1                             | 0.105  | 1.075 | 3.843 | 0.381  |
| RASAL2                             | 0.735  | 1.664 | 6.895 | 2.907  |
| RASAL3                             | -0.551 | 0.683 | 3.985 | -1.898 |
| RASD1                              | 0.731  | 1.660 | 7.383 | 1.649  |
| RASD2                              | 1.074  | 2.106 | 5.024 | 2.530  |
| RASGEF1A                           | 0.286  | 1.219 | 5.344 | 1.093  |
| RASGEF1B                           | -0.685 | 0.622 | 4.164 | -2.292 |
| RASGRF2                            | 0.535  | 1.449 | 7.384 | 1.520  |
| RASGRF2-AS1//CTC-459I6.1           | 0.640  | 1.558 | 2.420 | 2.365  |
| RASGRP1                            | 1.442  | 2.717 | 4.790 | 3.256  |
| RASGRP2                            | 0.376  | 1.297 | 2.545 | 1.394  |
| RASGRP3                            | -1.367 | 0.388 | 5.535 | -2.975 |
| RASGRP4                            | -0.253 | 0.839 | 3.401 | -0.777 |
| RASIP1                             | 0.268  | 1.204 | 3.420 | 1.152  |
| RASL10A                            | 0.454  | 1.369 | 3.271 | 1.481  |
| RASL10B                            | 0.516  | 1.430 | 5.868 | 1.813  |
| RASL11B                            | 1.426  | 2.687 | 3.729 | 3.849  |
| RASL12                             | -0.786 | 0.580 | 4.558 | -2.785 |
| RASSF1                             | -0.230 | 0.853 | 3.064 | -0.917 |
| RASSF2                             | -1.213 | 0.432 | 9.236 | -2.925 |
| RASSF3                             | 0.069  | 1.049 | 4.440 | 0.273  |
| RASSF4                             | -0.373 | 0.772 | 6.472 | -1.358 |

|                |        |       |       |        |
|----------------|--------|-------|-------|--------|
| RASSF8         | -0.322 | 0.800 | 5.851 | -1.471 |
| RASSF9         | -0.943 | 0.520 | 3.014 | -2.479 |
| RB1CC1         | 0.499  | 1.414 | 6.888 | 2.392  |
| RBBP5          | 0.306  | 1.236 | 6.434 | 1.331  |
| RBBP9          | 0.081  | 1.058 | 5.832 | 0.277  |
| RBCK1          | -0.361 | 0.779 | 5.673 | -1.548 |
| RBFOX1         | 1.256  | 2.388 | 5.493 | 2.290  |
| RBFOX2         | 0.615  | 1.531 | 5.351 | 2.094  |
| RBFOX3         | 1.803  | 3.488 | 4.648 | 3.003  |
| RBM11          | 0.030  | 1.021 | 4.616 | 0.109  |
| RBM24          | 0.504  | 1.418 | 2.242 | 1.567  |
| RBM3           | -0.050 | 0.966 | 5.045 | -0.143 |
| RBM38          | 0.160  | 1.118 | 3.900 | 0.659  |
| RBM47          | 0.031  | 1.022 | 2.898 | 0.132  |
| RBM48          | -0.161 | 0.895 | 4.812 | -0.723 |
| RBM5-AS1       | -0.032 | 0.978 | 2.699 | -0.102 |
| RBMS3          | 0.021  | 1.015 | 5.058 | 0.076  |
| RBP1           | -0.344 | 0.788 | 3.301 | -1.600 |
| RBP4           | 1.092  | 2.132 | 5.313 | 2.410  |
| RBP7           | -0.492 | 0.711 | 3.513 | -1.035 |
| RBPMS          | 0.044  | 1.031 | 3.813 | 0.153  |
| RCAN2          | 0.326  | 1.253 | 7.878 | 1.360  |
| RCAN3          | -0.785 | 0.580 | 4.634 | -2.542 |
| RCHY1          | 0.315  | 1.244 | 4.733 | 1.569  |
| RCN3           | -0.056 | 0.962 | 3.354 | -0.243 |
| RCOR2          | 0.454  | 1.370 | 2.989 | 1.794  |
| RCSD1          | -0.284 | 0.821 | 3.017 | -0.841 |
| RCVRN          | 0.513  | 1.427 | 2.353 | 1.550  |
| RDH10          | 0.126  | 1.091 | 4.698 | 0.415  |
| RDX            | -0.711 | 0.611 | 6.169 | -2.270 |
| REC8           | -0.246 | 0.843 | 3.970 | -1.027 |
| RECQL          | 0.043  | 1.030 | 5.777 | 0.174  |
| REEP1          | 0.486  | 1.400 | 3.288 | 1.606  |
| REEP2          | 0.397  | 1.317 | 5.961 | 1.329  |
| REEP3          | -0.833 | 0.561 | 7.366 | -2.489 |
| REEP4          | -0.346 | 0.787 | 3.743 | -1.597 |
| REEP5          | 0.233  | 1.176 | 7.909 | 1.210  |
| REL            | -0.047 | 0.968 | 6.012 | -0.174 |
| RELA           | -0.305 | 0.810 | 5.809 | -1.268 |
| RELL1          | -0.211 | 0.864 | 7.082 | -0.721 |
| RELL2          | 0.644  | 1.562 | 5.144 | 1.842  |
| RELN           | 0.390  | 1.311 | 5.684 | 0.785  |
| RENBP          | -0.587 | 0.666 | 3.698 | -2.212 |
| REPIN1         | 0.313  | 1.242 | 4.311 | 1.257  |
| REPS2          | 0.401  | 1.320 | 7.377 | 1.853  |
| RERG           | 0.191  | 1.142 | 3.836 | 0.698  |
| RET//KIF5B     | 0.558  | 1.472 | 4.188 | 1.277  |
| RETSAT         | -0.237 | 0.849 | 7.032 | -1.200 |
| REXO1//MIR1909 | 0.458  | 1.374 | 4.915 | 1.834  |
| RFC3           | 0.246  | 1.186 | 4.389 | 0.916  |

|                                  |        |       |       |        |
|----------------------------------|--------|-------|-------|--------|
| RFFL//RAD51D//RAD51L3-RFFL       | -0.676 | 0.626 | 5.090 | -2.467 |
| RFK                              | 0.170  | 1.125 | 3.798 | 0.818  |
| RFNG                             | -0.126 | 0.917 | 4.891 | -0.450 |
| RFPL1S                           | 1.504  | 2.837 | 4.651 | 2.657  |
| RFT1                             | 0.012  | 1.008 | 5.475 | 0.047  |
| RFTN1                            | 0.554  | 1.468 | 3.544 | 1.631  |
| RFTN2                            | -0.803 | 0.573 | 8.079 | -2.549 |
| RFX1                             | -0.084 | 0.943 | 3.566 | -0.358 |
| RFX2                             | -0.391 | 0.763 | 4.937 | -1.689 |
| RFX4                             | -0.254 | 0.839 | 6.555 | -1.003 |
| RGAG4                            | 0.175  | 1.129 | 4.499 | 0.661  |
| RGCC                             | -0.624 | 0.649 | 7.568 | -1.929 |
| RGL3                             | -0.152 | 0.900 | 3.856 | -0.563 |
| RGMA                             | -0.148 | 0.903 | 4.362 | -0.616 |
| RGPD4                            | 0.193  | 1.143 | 3.329 | 0.919  |
| RGPD6//RGPD8//RGPD5//RGPD4//RGPI | 0.225  | 1.168 | 8.470 | 1.207  |
| RGPD6//RGPD8//RGPD5//RGPD4//RGPI | 0.184  | 1.136 | 7.471 | 0.975  |
| RGPD6//RGPD8//RGPD5//RGPD4//RGPI | 0.181  | 1.134 | 7.143 | 0.964  |
| RGR                              | 0.787  | 1.725 | 2.887 | 1.734  |
| RGS1                             | -0.714 | 0.610 | 7.146 | -1.321 |
| RGS10                            | -0.527 | 0.694 | 3.925 | -1.438 |
| RGS11                            | -0.400 | 0.758 | 5.390 | -1.534 |
| RGS14                            | 0.443  | 1.360 | 3.540 | 1.631  |
| RGS16                            | 0.392  | 1.312 | 4.917 | 0.830  |
| RGS17                            | 0.438  | 1.355 | 4.288 | 1.680  |
| RGS19                            | -0.239 | 0.848 | 5.066 | -0.754 |
| RGS2                             | -0.031 | 0.979 | 6.838 | -0.088 |
| RGS20                            | 0.470  | 1.385 | 3.106 | 2.100  |
| RGS22                            | -0.077 | 0.948 | 2.010 | -0.320 |
| RGS4                             | 1.987  | 3.963 | 5.053 | 2.871  |
| RGS6                             | 0.552  | 1.467 | 4.762 | 1.535  |
| RGS7                             | 1.229  | 2.344 | 5.510 | 2.509  |
| RGS7BP                           | 1.384  | 2.611 | 6.231 | 2.200  |
| RGS8                             | -0.229 | 0.853 | 4.082 | -0.563 |
| RGS9                             | -0.643 | 0.640 | 4.908 | -2.038 |
| RHBDD2                           | 0.067  | 1.048 | 6.595 | 0.299  |
| RHBDF1                           | -0.078 | 0.948 | 3.333 | -0.316 |
| RHBDF2                           | -0.782 | 0.582 | 5.545 | -2.407 |
| RHBDL1                           | 0.468  | 1.383 | 3.305 | 1.565  |
| RHBDL2                           | -0.719 | 0.607 | 4.268 | -1.627 |
| RHBDL3                           | 0.424  | 1.342 | 4.197 | 1.529  |
| RHCG                             | 0.832  | 1.781 | 2.388 | 3.847  |
| RHEBL1                           | 0.908  | 1.877 | 2.216 | 2.879  |
| RHOB                             | -0.400 | 0.758 | 9.291 | -1.720 |
| RHOBTB2                          | 0.669  | 1.589 | 5.372 | 2.031  |
| RHOF                             | 0.193  | 1.143 | 3.588 | 0.744  |
| RHOG                             | -0.696 | 0.617 | 2.717 | -1.912 |
| RHOJ                             | 0.657  | 1.577 | 4.905 | 2.353  |
| RHOT1                            | 0.311  | 1.241 | 7.535 | 1.699  |
| RHOU//DUSP5P1                    | -0.414 | 0.750 | 5.147 | -1.589 |

|                      |        |       |        |        |
|----------------------|--------|-------|--------|--------|
| RHPN2                | 0.530  | 1.443 | 5.297  | 1.517  |
| RIBC2                | 0.054  | 1.038 | 2.243  | 0.181  |
| RIAD1                | 0.750  | 1.682 | 2.576  | 2.274  |
| RILP                 | 0.291  | 1.224 | 3.676  | 1.061  |
| RIMBP2               | 0.692  | 1.615 | 5.400  | 1.827  |
| RIMBP2//RP11-117L5.4 | 0.575  | 1.490 | 2.870  | 1.927  |
| RIMBP3               | -0.193 | 0.875 | 2.922  | -0.661 |
| RIMKLA               | 0.752  | 1.684 | 5.098  | 1.705  |
| RIMS1                | 0.991  | 1.987 | 5.540  | 2.309  |
| RIMS2                | 1.300  | 2.462 | 5.488  | 2.845  |
| RIMS3                | 1.677  | 3.197 | 6.109  | 2.868  |
| RIMS4                | 0.695  | 1.619 | 3.743  | 1.684  |
| RIN1                 | 0.314  | 1.243 | 2.580  | 1.171  |
| RIN3                 | -0.216 | 0.861 | 2.982  | -0.645 |
| RINT1                | 0.498  | 1.412 | 4.762  | 2.465  |
| RIPK2                | -0.097 | 0.935 | 5.534  | -0.442 |
| RIPPLY2              | 0.417  | 1.335 | 3.142  | 1.681  |
| RIT2                 | 0.823  | 1.769 | 4.323  | 2.142  |
| RITA1//C12orf52      | 0.161  | 1.118 | 4.784  | 0.549  |
| RLBP1                | 1.596  | 3.022 | 2.836  | 4.475  |
| RLF                  | 0.200  | 1.149 | 6.848  | 0.932  |
| RLIM                 | 0.420  | 1.338 | 7.353  | 2.038  |
| RLN3                 | -0.482 | 0.716 | 2.966  | -1.832 |
| RMDN1                | -0.228 | 0.854 | 4.898  | -0.993 |
| RMND1                | 0.196  | 1.146 | 5.125  | 0.929  |
| RMND5A               | 0.093  | 1.067 | 6.477  | 0.444  |
| RMRP//RP11-331F9.10  | -0.249 | 0.842 | 10.953 | -1.445 |
| RMST                 | -0.127 | 0.916 | 4.984  | -0.402 |
| RN7SK                | -0.451 | 0.731 | 11.098 | -1.946 |
| RN7SKP105            | -0.146 | 0.904 | 3.803  | -0.403 |
| RN7SKP106            | 1.467  | 2.765 | 1.873  | 3.625  |
| RN7SKP111            | -0.351 | 0.784 | 6.019  | -1.300 |
| RN7SKP134            | 0.225  | 1.169 | 2.341  | 0.935  |
| RN7SKP154            | -1.224 | 0.428 | 2.655  | -2.494 |
| RN7SKP16             | -0.637 | 0.643 | 3.925  | -2.080 |
| RN7SKP173            | 0.140  | 1.102 | 3.104  | 0.326  |
| RN7SKP174            | 0.121  | 1.088 | 2.816  | 0.447  |
| RN7SKP207            | -0.137 | 0.909 | 2.913  | -0.549 |
| RN7SKP231            | -0.017 | 0.988 | 5.644  | -0.061 |
| RN7SKP232            | -0.262 | 0.834 | 2.492  | -1.072 |
| RN7SKP233            | -0.405 | 0.755 | 3.136  | -0.713 |
| RN7SKP25             | -0.757 | 0.592 | 3.883  | -2.549 |
| RN7SKP262            | -0.080 | 0.946 | 2.309  | -0.324 |
| RN7SKP283            | -0.016 | 0.989 | 2.674  | -0.055 |
| RN7SKP40             | -0.644 | 0.640 | 2.839  | -1.888 |
| RN7SKP5              | -1.306 | 0.405 | 4.208  | -2.211 |
| RN7SKP53             | 0.520  | 1.433 | 3.262  | 1.260  |
| RN7SKP55             | -0.284 | 0.821 | 6.015  | -1.184 |
| RN7SKP56             | -0.627 | 0.647 | 4.569  | -1.226 |
| RN7SKP62             | -0.137 | 0.910 | 2.901  | -0.511 |

|           |        |       |       |        |
|-----------|--------|-------|-------|--------|
| RN7SKP65  | -0.183 | 0.881 | 2.645 | -0.469 |
| RN7SKP7   | -0.056 | 0.962 | 4.456 | -0.205 |
| RN7SKP75  | -0.018 | 0.988 | 2.654 | -0.051 |
| RN7SKP80  | -0.217 | 0.860 | 4.011 | -0.737 |
| RN7SKP86  | 0.350  | 1.275 | 2.544 | 0.751  |
| RNA5-8SP2 | 0.103  | 1.074 | 3.375 | 0.231  |
| RNA5-8SP4 | -0.062 | 0.958 | 2.772 | -0.186 |
| RNA5-8SP6 | -0.080 | 0.946 | 3.436 | -0.226 |
| RNA5SP111 | 0.002  | 1.001 | 3.324 | 0.005  |
| RNA5SP113 | 0.268  | 1.204 | 3.838 | 0.633  |
| RNA5SP122 | 0.454  | 1.370 | 3.101 | 1.314  |
| RNA5SP125 | 0.652  | 1.571 | 2.970 | 2.117  |
| RNA5SP129 | 0.072  | 1.051 | 3.287 | 0.208  |
| RNA5SP132 | -0.094 | 0.937 | 5.958 | -0.447 |
| RNA5SP134 | 0.396  | 1.316 | 2.463 | 1.060  |
| RNA5SP145 | 0.478  | 1.392 | 2.809 | 1.199  |
| RNA5SP150 | -0.339 | 0.790 | 5.774 | -0.976 |
| RNA5SP153 | -0.178 | 0.884 | 3.218 | -0.378 |
| RNA5SP156 | -0.036 | 0.976 | 3.752 | -0.100 |
| RNA5SP161 | -0.056 | 0.962 | 3.599 | -0.230 |
| RNA5SP174 | -0.241 | 0.846 | 3.268 | -1.168 |
| RNA5SP176 | 0.564  | 1.478 | 2.223 | 1.539  |
| RNA5SP180 | 0.583  | 1.498 | 2.254 | 1.585  |
| RNA5SP182 | 0.173  | 1.127 | 3.039 | 0.588  |
| RNA5SP19  | 0.356  | 1.280 | 5.250 | 0.878  |
| RNA5SP190 | -0.005 | 0.996 | 2.450 | -0.020 |
| RNA5SP191 | 0.980  | 1.972 | 3.175 | 1.669  |
| RNA5SP195 | -0.326 | 0.798 | 4.510 | -1.016 |
| RNA5SP199 | 0.334  | 1.261 | 9.939 | 1.303  |
| RNA5SP199 | 0.222  | 1.166 | 9.273 | 0.894  |
| RNA5SP20  | -0.199 | 0.871 | 2.265 | -0.589 |
| RNA5SP207 | -0.271 | 0.829 | 2.482 | -1.009 |
| RNA5SP217 | -0.373 | 0.772 | 3.373 | -0.927 |
| RNA5SP218 | 0.162  | 1.119 | 2.427 | 0.459  |
| RNA5SP237 | -0.334 | 0.793 | 4.277 | -0.913 |
| RNA5SP242 | 0.054  | 1.038 | 2.831 | 0.203  |
| RNA5SP248 | -0.296 | 0.814 | 2.580 | -1.047 |
| RNA5SP25  | -0.546 | 0.685 | 2.550 | -1.475 |
| RNA5SP256 | -0.238 | 0.848 | 3.064 | -0.769 |
| RNA5SP259 | 0.266  | 1.203 | 2.636 | 0.821  |
| RNA5SP260 | -0.454 | 0.730 | 4.065 | -0.943 |
| RNA5SP289 | 0.170  | 1.125 | 2.674 | 0.604  |
| RNA5SP290 | -0.047 | 0.968 | 3.352 | -0.142 |
| RNA5SP294 | 0.006  | 1.004 | 2.737 | 0.013  |
| RNA5SP300 | 0.052  | 1.037 | 2.288 | 0.114  |
| RNA5SP33  | -0.556 | 0.680 | 4.226 | -1.982 |
| RNA5SP341 | 0.035  | 1.025 | 2.380 | 0.103  |
| RNA5SP343 | 0.560  | 1.474 | 2.267 | 1.438  |
| RNA5SP344 | -0.261 | 0.834 | 2.549 | -0.721 |
| RNA5SP345 | -0.059 | 0.960 | 3.366 | -0.189 |

|           |        |       |       |        |
|-----------|--------|-------|-------|--------|
| RNA5SP361 | -0.407 | 0.754 | 3.247 | -1.437 |
| RNA5SP366 | 0.704  | 1.629 | 2.802 | 1.871  |
| RNA5SP370 | -0.618 | 0.652 | 2.971 | -2.362 |
| RNA5SP372 | -0.608 | 0.656 | 2.191 | -1.559 |
| RNA5SP383 | -0.331 | 0.795 | 3.233 | -0.981 |
| RNA5SP395 | 0.023  | 1.016 | 3.633 | 0.060  |
| RNA5SP399 | -0.162 | 0.894 | 4.599 | -0.520 |
| RNA5SP403 | -0.288 | 0.819 | 4.663 | -0.897 |
| RNA5SP405 | -0.696 | 0.617 | 3.014 | -1.963 |
| RNA5SP406 | 0.215  | 1.161 | 2.719 | 0.666  |
| RNA5SP408 | 0.890  | 1.853 | 2.647 | 2.330  |
| RNA5SP409 | 0.611  | 1.527 | 3.467 | 1.618  |
| RNA5SP415 | -0.278 | 0.824 | 2.648 | -0.695 |
| RNA5SP425 | -0.228 | 0.854 | 3.538 | -0.678 |
| RNA5SP427 | -0.502 | 0.706 | 2.485 | -1.424 |
| RNA5SP428 | -0.371 | 0.773 | 4.838 | -1.324 |
| RNA5SP434 | -0.348 | 0.786 | 3.729 | -1.173 |
| RNA5SP435 | 0.568  | 1.483 | 4.000 | 1.315  |
| RNA5SP441 | 0.330  | 1.257 | 2.739 | 1.091  |
| RNA5SP450 | -0.288 | 0.819 | 2.706 | -0.741 |
| RNA5SP455 | -0.066 | 0.955 | 2.591 | -0.250 |
| RNA5SP473 | -0.470 | 0.722 | 4.220 | -1.898 |
| RNA5SP474 | -0.844 | 0.557 | 3.395 | -2.272 |
| RNA5SP478 | -0.083 | 0.944 | 2.609 | -0.282 |
| RNA5SP486 | -0.368 | 0.775 | 2.866 | -1.325 |
| RNA5SP488 | -0.459 | 0.727 | 3.114 | -1.538 |
| RNA5SP497 | 0.374  | 1.296 | 1.986 | 1.190  |
| RNA5SP513 | -0.022 | 0.985 | 2.419 | -0.066 |
| RNA5SP55  | -0.152 | 0.900 | 3.113 | -0.499 |
| RNA5SP60  | 0.306  | 1.236 | 4.978 | 1.146  |
| RNA5SP64  | 0.395  | 1.315 | 2.872 | 0.840  |
| RNA5SP65  | -0.215 | 0.861 | 3.948 | -0.691 |
| RNA5SP68  | -0.189 | 0.877 | 2.386 | -0.647 |
| RNA5SP69  | 0.111  | 1.080 | 2.457 | 0.320  |
| RNA5SP82  | 0.196  | 1.145 | 2.727 | 0.523  |
| RNA5SP85  | 0.318  | 1.247 | 6.222 | 0.765  |
| RNA5SP93  | 0.349  | 1.274 | 3.372 | 1.378  |
| RNA5SP99  | 0.120  | 1.087 | 4.633 | 0.331  |
| RNASE1    | -0.508 | 0.703 | 5.614 | -1.568 |
| RNASE2    | -0.163 | 0.893 | 5.822 | -0.203 |
| RNASE3    | 0.065  | 1.046 | 3.402 | 0.096  |
| RNASE6    | -0.571 | 0.673 | 5.815 | -1.230 |
| RNASEL    | 0.298  | 1.229 | 4.165 | 1.180  |
| RNASET2   | -0.678 | 0.625 | 5.408 | -2.402 |
| RND1      | 1.208  | 2.309 | 5.108 | 2.789  |
| RND2      | -0.547 | 0.684 | 7.959 | -1.695 |
| RND3      | 0.523  | 1.437 | 3.581 | 1.798  |
| RNF11     | 0.398  | 1.318 | 8.372 | 2.154  |
| RNF111    | 0.041  | 1.029 | 6.246 | 0.205  |
| RNF112    | 0.397  | 1.317 | 3.930 | 1.442  |

|                     |        |       |       |        |
|---------------------|--------|-------|-------|--------|
| RNF113B             | 0.001  | 1.001 | 2.370 | 0.005  |
| RNF122              | 0.110  | 1.079 | 4.228 | 0.296  |
| RNF125//RP11-53I6.2 | -1.124 | 0.459 | 4.091 | -2.379 |
| RNF126              | 0.222  | 1.166 | 4.900 | 0.772  |
| RNF128              | 0.659  | 1.579 | 3.027 | 2.460  |
| RNF13               | -0.429 | 0.743 | 8.090 | -1.758 |
| RNF130              | -0.724 | 0.605 | 6.863 | -2.868 |
| RNF135              | -0.511 | 0.702 | 3.479 | -1.514 |
| RNF139-AS1          | -0.007 | 0.995 | 3.109 | -0.026 |
| RNF141              | -0.292 | 0.817 | 6.386 | -1.176 |
| RNF144A-AS1         | 0.931  | 1.907 | 2.831 | 2.154  |
| RNF144B             | 0.069  | 1.049 | 5.233 | 0.214  |
| RNF145              | 0.351  | 1.276 | 5.957 | 1.783  |
| RNF149              | 0.154  | 1.112 | 5.380 | 0.496  |
| RNF150              | 0.243  | 1.184 | 4.676 | 1.015  |
| RNF157              | 0.582  | 1.497 | 7.294 | 2.095  |
| RNF165              | 1.087  | 2.124 | 4.100 | 2.413  |
| RNF175              | 0.937  | 1.914 | 4.143 | 1.978  |
| RNF182              | 0.194  | 1.144 | 4.364 | 0.770  |
| RNF185-AS1          | 0.266  | 1.203 | 2.644 | 0.760  |
| RNF19B              | 0.074  | 1.053 | 6.226 | 0.363  |
| RNF2                | 0.069  | 1.049 | 5.182 | 0.311  |
| RNF208              | 0.549  | 1.463 | 2.745 | 2.233  |
| RNF213              | -0.713 | 0.610 | 6.601 | -2.622 |
| RNF216P1            | -0.527 | 0.694 | 3.336 | -1.781 |
| RNF219              | 0.354  | 1.279 | 5.542 | 1.446  |
| RNF219-AS1          | -0.355 | 0.782 | 5.319 | -1.020 |
| RNF219-AS1          | -0.013 | 0.991 | 5.161 | -0.039 |
| RNF220              | -0.714 | 0.609 | 5.538 | -2.311 |
| RNF32               | -0.223 | 0.857 | 2.988 | -0.827 |
| RNF41               | 0.173  | 1.127 | 6.568 | 0.818  |
| RNF43               | 0.547  | 1.461 | 3.208 | 1.811  |
| RNF5P1              | -0.221 | 0.858 | 3.365 | -0.783 |
| RNF6                | 0.436  | 1.353 | 6.623 | 1.935  |
| RNF8                | 0.186  | 1.138 | 4.660 | 0.903  |
| RNFT2               | 0.554  | 1.468 | 5.888 | 2.211  |
| RNGTT               | 0.262  | 1.199 | 5.585 | 1.356  |
| RNH1                | -0.530 | 0.692 | 6.242 | -2.246 |
| RNMT                | 0.450  | 1.366 | 5.814 | 1.840  |
| RNMTL1              | 0.419  | 1.337 | 4.465 | 1.954  |
| RNPC3               | 0.167  | 1.123 | 7.070 | 0.701  |
| RNPEPL1             | -0.444 | 0.735 | 4.391 | -2.032 |
| RNPS1//MIR572       | -0.043 | 0.971 | 3.903 | -0.100 |
| RNU105B             | 0.683  | 1.605 | 4.358 | 1.458  |
| RNU11               | -0.485 | 0.715 | 9.485 | -1.228 |
| RNU1-103P           | -0.333 | 0.794 | 3.296 | -0.720 |
| RNU1-106P           | -0.614 | 0.654 | 2.135 | -1.431 |
| RNU1-112P           | 0.118  | 1.085 | 2.402 | 0.361  |
| RNU1-119P           | -0.172 | 0.888 | 2.520 | -0.714 |
| RNU1-119P//RNU1-78P | -0.210 | 0.865 | 5.830 | -0.779 |



|                    |        |       |        |        |
|--------------------|--------|-------|--------|--------|
| RNU1-122P          | 0.534  | 1.448 | 4.253  | 1.591  |
| RNU1-132P          | 0.239  | 1.180 | 3.903  | 0.841  |
| RNU1-136P          | 0.044  | 1.031 | 4.799  | 0.172  |
| RNU1-138P          | 0.059  | 1.041 | 2.686  | 0.152  |
| RNU1-13P           | 0.163  | 1.120 | 4.864  | 0.510  |
| RNU1-14P           | -0.332 | 0.795 | 3.943  | -0.927 |
| RNU1-150P          | 0.080  | 1.057 | 2.578  | 0.334  |
| RNU1-16P           | -0.047 | 0.968 | 4.423  | -0.154 |
| RNU1-18P           | 0.093  | 1.066 | 3.674  | 0.328  |
| RNU1-19P           | -0.158 | 0.896 | 4.932  | -0.616 |
| RNU12              | -0.321 | 0.800 | 6.189  | -1.081 |
| RNU1-23P           | 0.456  | 1.372 | 3.128  | 1.416  |
| RNU1-24P           | 0.438  | 1.355 | 3.320  | 1.012  |
| RNU1-38P           | -0.311 | 0.806 | 7.243  | -0.985 |
| RNU1-41P//RNU1-48P | 0.334  | 1.260 | 4.197  | 0.559  |
| RNU1-42P           | -0.476 | 0.719 | 3.881  | -1.654 |
| RNU1-44P           | 0.034  | 1.024 | 3.127  | 0.094  |
| RNU1-47P           | -0.477 | 0.718 | 2.585  | -1.718 |
| RNU1-51P           | 0.008  | 1.006 | 1.986  | 0.020  |
| RNU1-56P           | -0.445 | 0.734 | 3.587  | -1.751 |
| RNU1-58P           | 0.113  | 1.081 | 2.519  | 0.385  |
| RNU1-59P           | 0.185  | 1.137 | 4.391  | 0.464  |
| RNU1-74P           | -0.308 | 0.808 | 2.734  | -1.076 |
| RNU1-82P           | 0.207  | 1.154 | 2.471  | 0.539  |
| RNU1-83P           | -0.464 | 0.725 | 8.129  | -1.535 |
| RNU1-87P           | -0.397 | 0.759 | 4.866  | -1.399 |
| RNU1-91P           | -0.349 | 0.785 | 4.498  | -1.381 |
| RNU1-94P           | -0.746 | 0.596 | 3.906  | -2.213 |
| RNU2-58P           | -0.160 | 0.895 | 2.875  | -0.568 |
| RNU2-7P            | -0.321 | 0.800 | 2.779  | -0.927 |
| RNU4-24P           | -0.356 | 0.781 | 3.142  | -1.128 |
| RNU4-32P//MMAB     | -0.364 | 0.777 | 4.667  | -1.137 |
| RNU4-33P//RNU4-87P | 0.118  | 1.085 | 3.182  | 0.415  |
| RNU4-61P           | 0.152  | 1.111 | 2.790  | 0.463  |
| RNU4-62P           | -0.261 | 0.834 | 4.265  | -0.635 |
| RNU4-78P           | -0.527 | 0.694 | 5.598  | -1.815 |
| RNU4-82P           | -0.011 | 0.992 | 2.286  | -0.038 |
| RNU4-87P           | 0.437  | 1.354 | 3.626  | 1.253  |
| RNU4ATAC           | -0.185 | 0.880 | 10.048 | -0.898 |
| RNU4ATAC11P        | -0.303 | 0.811 | 6.015  | -0.715 |
| RNU4ATAC16P        | -0.418 | 0.748 | 2.795  | -0.814 |
| RNU4ATAC18P        | -0.926 | 0.526 | 2.958  | -1.960 |
| RNU5B-1            | 0.045  | 1.032 | 4.253  | 0.120  |
| RNU5D-1            | -0.309 | 0.807 | 3.074  | -0.469 |
| RNU5E-1            | -0.392 | 0.762 | 7.511  | -0.826 |
| RNU5E-9P           | -0.210 | 0.865 | 5.344  | -0.782 |
| RNU5F-1            | 0.364  | 1.287 | 2.310  | 0.828  |
| RNU6-1003P         | 1.127  | 2.184 | 1.764  | 3.755  |
| RNU6-1005P         | -0.213 | 0.863 | 5.646  | -0.699 |
| RNU6-1010P         | 0.183  | 1.135 | 2.330  | 0.436  |

|                                   |        |       |       |        |
|-----------------------------------|--------|-------|-------|--------|
| RNU6-1013P                        | 0.025  | 1.017 | 2.659 | 0.057  |
| RNU6-1014P                        | -1.768 | 0.294 | 5.915 | -2.399 |
| RNU6-1016P                        | -0.214 | 0.862 | 5.408 | -0.571 |
| RNU6-1017P                        | -0.404 | 0.756 | 4.872 | -1.832 |
| RNU6-1052P                        | -0.422 | 0.746 | 2.552 | -0.892 |
| RNU6-1053P                        | -0.067 | 0.955 | 2.650 | -0.143 |
| RNU6-1054P                        | 0.318  | 1.247 | 3.555 | 0.777  |
| RNU6-1057P                        | -0.450 | 0.732 | 4.232 | -1.226 |
| RNU6-1064P                        | -0.382 | 0.767 | 2.945 | -1.223 |
| RNU6-1067P                        | -0.017 | 0.988 | 4.397 | -0.067 |
| RNU6-1073P                        | -0.167 | 0.891 | 2.501 | -0.584 |
| RNU6-1080P                        | -0.208 | 0.866 | 3.043 | -0.775 |
| RNU6-1087P                        | 0.206  | 1.154 | 2.765 | 0.693  |
| RNU6-108P                         | -0.596 | 0.661 | 2.930 | -1.571 |
| RNU6-1099P                        | 0.156  | 1.114 | 4.815 | 0.418  |
| RNU6-1105P                        | -0.257 | 0.837 | 2.102 | -0.966 |
| RNU6-1112P                        | -0.880 | 0.543 | 2.986 | -2.468 |
| RNU6-1122P                        | -0.320 | 0.801 | 2.427 | -1.054 |
| RNU6-1123P                        | 0.602  | 1.518 | 5.057 | 1.739  |
| RNU6-1141P                        | -0.920 | 0.529 | 2.120 | -2.037 |
| RNU6-1162P                        | 0.291  | 1.223 | 2.082 | 0.999  |
| RNU6-1181P                        | -0.049 | 0.967 | 3.842 | -0.114 |
| RNU6-1184P                        | 0.139  | 1.101 | 3.893 | 0.296  |
| RNU6-118P                         | -0.312 | 0.805 | 7.024 | -1.270 |
| RNU6-119P                         | -0.263 | 0.833 | 3.546 | -0.992 |
| RNU6-1226P                        | -0.449 | 0.732 | 4.210 | -1.502 |
| RNU6-1262P                        | -0.230 | 0.852 | 3.222 | -0.538 |
| RNU6-126P                         | -0.978 | 0.508 | 2.183 | -2.258 |
| RNU6-1274P                        | -0.316 | 0.803 | 2.033 | -1.091 |
| RNU6-1279P                        | -0.305 | 0.810 | 3.270 | -0.721 |
| RNU6-1283P                        | 0.034  | 1.024 | 2.945 | 0.100  |
| RNU6-1284P                        | -0.322 | 0.800 | 3.759 | -0.752 |
| RNU6-1295P                        | -0.558 | 0.679 | 2.455 | -1.427 |
| RNU6-1298P                        | -0.151 | 0.901 | 2.878 | -0.538 |
| RNU6-1305P                        | 0.840  | 1.790 | 2.646 | 2.313  |
| RNU6-130P                         | 0.096  | 1.069 | 4.069 | 0.317  |
| RNU6-1319P//RNU6-747P//RNU6-241P, | -0.251 | 0.840 | 4.080 | -0.837 |
| RNU6-1320P//RNU6-1269P//RNU6-599f | 0.917  | 1.888 | 4.366 | 2.646  |
| RNU6-1320P//RNU6-1269P//RNU6-599f | 0.822  | 1.767 | 4.003 | 2.573  |
| RNU6-1320P//RNU6-1269P//RNU6-599f | 0.863  | 1.819 | 4.112 | 2.672  |
| RNU6-1327P                        | -1.035 | 0.488 | 2.527 | -2.069 |
| RNU6-1340P                        | -0.660 | 0.633 | 2.754 | -1.952 |
| RNU6-135P                         | 0.174  | 1.128 | 3.314 | 0.498  |
| RNU6-137P                         | 0.050  | 1.035 | 3.592 | 0.153  |
| RNU6-143P                         | 1.076  | 2.109 | 3.121 | 2.418  |
| RNU6-165P                         | 0.042  | 1.029 | 2.874 | 0.160  |
| RNU6-171P                         | -0.300 | 0.812 | 3.614 | -1.180 |
| RNU6-176P                         | 0.205  | 1.153 | 2.980 | 0.579  |
| RNU6-177P                         | -0.564 | 0.677 | 2.901 | -1.577 |
| RNU6-178P                         | -0.112 | 0.925 | 3.522 | -0.444 |

|                                   |        |       |       |        |
|-----------------------------------|--------|-------|-------|--------|
| RNU6-188P                         | 0.066  | 1.047 | 4.036 | 0.180  |
| RNU6-195P                         | 0.076  | 1.054 | 2.536 | 0.210  |
| RNU6-196P                         | 0.265  | 1.202 | 4.020 | 0.570  |
| RNU6-202P                         | -0.846 | 0.556 | 2.236 | -2.373 |
| RNU6-204P                         | -0.209 | 0.865 | 1.643 | -0.559 |
| RNU6-208P                         | -0.184 | 0.880 | 2.442 | -0.668 |
| RNU6-216P                         | -0.057 | 0.961 | 3.973 | -0.169 |
| RNU6-220P                         | -0.136 | 0.910 | 2.632 | -0.481 |
| RNU6-226P                         | 0.759  | 1.692 | 4.054 | 1.732  |
| RNU6-252P                         | 0.001  | 1.001 | 2.985 | 0.003  |
| RNU6-271P                         | 0.607  | 1.523 | 1.780 | 1.751  |
| RNU6-283P//RNU6-683P              | 0.189  | 1.140 | 3.423 | 0.684  |
| RNU6-28P//RNU6-738P//APBA3        | 0.010  | 1.007 | 3.787 | 0.028  |
| RNU6-294P                         | -0.263 | 0.833 | 2.790 | -0.621 |
| RNU6-313P                         | 0.434  | 1.351 | 2.774 | 1.144  |
| RNU6-316P                         | 1.083  | 2.119 | 2.891 | 2.484  |
| RNU6-321P                         | 1.056  | 2.080 | 3.943 | 2.300  |
| RNU6-326P                         | -0.129 | 0.914 | 2.506 | -0.433 |
| RNU6-331P                         | 0.194  | 1.144 | 2.636 | 0.712  |
| RNU6-341P                         | 0.137  | 1.100 | 4.601 | 0.372  |
| RNU6-353P                         | -0.026 | 0.982 | 5.686 | -0.114 |
| RNU6-359P                         | -0.031 | 0.979 | 2.548 | -0.104 |
| RNU6-360P                         | 0.160  | 1.118 | 2.607 | 0.494  |
| RNU6-367P                         | -0.005 | 0.996 | 3.551 | -0.017 |
| RNU6-371P                         | -0.276 | 0.826 | 3.264 | -0.779 |
| RNU6-377P                         | -0.101 | 0.932 | 4.223 | -0.297 |
| RNU6-386P                         | -0.564 | 0.677 | 2.725 | -2.022 |
| RNU6-395P                         | -0.060 | 0.960 | 3.455 | -0.238 |
| RNU6-398P                         | 0.152  | 1.111 | 2.662 | 0.504  |
| RNU6-411P                         | -2.260 | 0.209 | 5.458 | -3.174 |
| RNU6-418P                         | 0.886  | 1.848 | 1.908 | 3.470  |
| RNU6-429P                         | -0.186 | 0.879 | 2.907 | -0.473 |
| RNU6-431P                         | -0.153 | 0.899 | 3.515 | -0.393 |
| RNU6-433P                         | -0.669 | 0.629 | 3.635 | -1.505 |
| RNU6-439P                         | -0.084 | 0.944 | 4.326 | -0.308 |
| RNU6-441P                         | -0.182 | 0.882 | 3.130 | -0.570 |
| RNU6-447P//RNU6-1118P//RNU6-1076i | -0.324 | 0.799 | 4.910 | -0.935 |
| RNU6-447P//RNU6-1118P//RNU6-1076i | -0.226 | 0.855 | 5.059 | -0.743 |
| RNU6-457P                         | -0.527 | 0.694 | 2.835 | -0.912 |
| RNU6-466P                         | -1.516 | 0.350 | 5.075 | -3.199 |
| RNU6-469P                         | 0.141  | 1.103 | 2.576 | 0.314  |
| RNU6-482P                         | 0.193  | 1.143 | 3.968 | 0.597  |
| RNU6-522P                         | -0.299 | 0.813 | 2.654 | -0.648 |
| RNU6-529P                         | -0.393 | 0.761 | 5.862 | -1.365 |
| RNU6-530P                         | -0.578 | 0.670 | 4.869 | -1.423 |
| RNU6-548P                         | 0.452  | 1.368 | 2.006 | 1.897  |
| RNU6-552P                         | 0.079  | 1.056 | 3.551 | 0.272  |
| RNU6-560P                         | -0.243 | 0.845 | 4.390 | -0.655 |
| RNU6-564P                         | -0.723 | 0.606 | 2.651 | -2.080 |
| RNU6-572P                         | -0.106 | 0.929 | 2.645 | -0.318 |

|                                   |        |       |       |        |
|-----------------------------------|--------|-------|-------|--------|
| RNU6-580P                         | -0.172 | 0.888 | 5.715 | -0.556 |
| RNU6-59P                          | -0.255 | 0.838 | 2.755 | -0.868 |
| RNU6-605P                         | -0.264 | 0.833 | 2.760 | -0.747 |
| RNU6-606P                         | -0.555 | 0.681 | 3.675 | -1.562 |
| RNU6-611P                         | -0.831 | 0.562 | 4.163 | -2.722 |
| RNU6-618P                         | 0.058  | 1.041 | 2.744 | 0.172  |
| RNU6-621P                         | 0.269  | 1.205 | 2.330 | 0.720  |
| RNU6-622P                         | -0.224 | 0.856 | 3.504 | -0.736 |
| RNU6-623P                         | -0.489 | 0.713 | 2.496 | -1.595 |
| RNU6-652P                         | -0.696 | 0.617 | 2.822 | -1.544 |
| RNU6-653P                         | 0.046  | 1.032 | 2.469 | 0.097  |
| RNU6-654P                         | -0.280 | 0.824 | 3.218 | -1.038 |
| RNU6-680P                         | -0.505 | 0.705 | 2.332 | -1.460 |
| RNU6-700P                         | -0.189 | 0.877 | 2.538 | -0.478 |
| RNU6-701P                         | -0.021 | 0.986 | 2.652 | -0.054 |
| RNU6-702P                         | -0.026 | 0.982 | 5.919 | -0.080 |
| RNU6-703P                         | -0.103 | 0.931 | 2.381 | -0.289 |
| RNU6-711P                         | 0.123  | 1.089 | 4.087 | 0.484  |
| RNU6-729P                         | 0.982  | 1.975 | 5.280 | 2.268  |
| RNU6-731P                         | -0.094 | 0.937 | 2.481 | -0.287 |
| RNU6-742P                         | -0.127 | 0.916 | 3.811 | -0.518 |
| RNU6-748P                         | 0.195  | 1.145 | 2.321 | 0.564  |
| RNU6-758P                         | -0.719 | 0.608 | 5.493 | -2.152 |
| RNU6-759P                         | -0.031 | 0.979 | 2.839 | -0.065 |
| RNU6-760P                         | 0.547  | 1.461 | 5.378 | 1.341  |
| RNU6-767P                         | -0.562 | 0.677 | 2.989 | -1.211 |
| RNU6-787P                         | 0.104  | 1.075 | 4.439 | 0.365  |
| RNU6-798P                         | -0.090 | 0.940 | 2.762 | -0.230 |
| RNU6-801P                         | -0.447 | 0.733 | 3.959 | -1.275 |
| RNU6-817P                         | -0.812 | 0.569 | 4.689 | -2.646 |
| RNU6-818P                         | -0.400 | 0.758 | 3.638 | -1.095 |
| RNU6-823P                         | -0.334 | 0.794 | 2.651 | -0.892 |
| RNU6-831P                         | 0.726  | 1.654 | 2.003 | 1.505  |
| RNU6-856P                         | 0.027  | 1.019 | 2.392 | 0.077  |
| RNU6-876P                         | 0.584  | 1.499 | 2.804 | 1.159  |
| RNU6-878P                         | -0.443 | 0.736 | 3.569 | -1.404 |
| RNU6-882P                         | 0.234  | 1.176 | 2.509 | 0.806  |
| RNU6-883P                         | -0.596 | 0.661 | 4.811 | -1.241 |
| RNU6-892P                         | 0.325  | 1.253 | 4.024 | 1.060  |
| RNU6-909P                         | 0.205  | 1.152 | 2.879 | 0.734  |
| RNU6-912P//RNU6-1319P//RNU6-747P, | -0.197 | 0.872 | 3.085 | -0.565 |
| RNU6-925P                         | -0.120 | 0.920 | 3.614 | -0.445 |
| RNU6-928P                         | -0.312 | 0.806 | 2.218 | -0.990 |
| RNU6-936P                         | -0.050 | 0.966 | 3.694 | -0.147 |
| RNU6-942P                         | -1.254 | 0.419 | 2.914 | -2.478 |
| RNU6-945P                         | -0.106 | 0.929 | 2.062 | -0.224 |
| RNU6-946P                         | -0.248 | 0.842 | 4.808 | -0.740 |
| RNU6-954P                         | 0.757  | 1.690 | 1.731 | 2.556  |
| RNU6-957P                         | -0.927 | 0.526 | 2.387 | -1.753 |
| RNU6-979P                         | -0.251 | 0.840 | 3.941 | -0.474 |

|                      |        |       |       |        |
|----------------------|--------|-------|-------|--------|
| RNU6-984P            | 0.336  | 1.262 | 3.120 | 1.261  |
| RNU6-992P            | -0.319 | 0.802 | 2.550 | -1.118 |
| RNU6-999P            | 0.426  | 1.344 | 2.306 | 1.454  |
| RNU6ATAC//RNU6ATAC2P | 0.203  | 1.151 | 7.236 | 0.662  |
| RNU6ATAC10P          | 0.713  | 1.639 | 4.442 | 1.737  |
| RNU6ATAC11P          | -0.316 | 0.803 | 2.668 | -1.219 |
| RNU6ATAC24P//PPP1R2  | 0.083  | 1.059 | 3.683 | 0.274  |
| RNU6ATAC27P          | -0.166 | 0.891 | 2.859 | -0.535 |
| RNU6ATAC2P//RNU6ATAC | 0.203  | 1.151 | 6.460 | 0.728  |
| RNU6ATAC36P          | 0.176  | 1.130 | 4.054 | 0.597  |
| RNU6ATAC5P           | 0.312  | 1.242 | 2.943 | 1.004  |
| RNU6ATAC6P           | 0.390  | 1.311 | 2.011 | 1.524  |
| RNU6ATAC9P           | -0.179 | 0.883 | 3.112 | -0.668 |
| RNU7-13P//RNU7-41P   | -0.231 | 0.852 | 2.248 | -0.543 |
| RNU7-151P            | -0.023 | 0.984 | 1.946 | -0.061 |
| RNU7-156P            | 1.990  | 3.972 | 2.915 | 2.626  |
| RNU7-170P            | 0.342  | 1.267 | 2.475 | 1.153  |
| RNU7-181P            | -0.530 | 0.693 | 2.830 | -1.239 |
| RNU7-187P            | -0.905 | 0.534 | 3.356 | -1.905 |
| RNU7-193P            | -0.483 | 0.716 | 2.981 | -1.618 |
| RNU7-194P            | -0.361 | 0.778 | 2.579 | -1.066 |
| RNU7-35P             | 0.163  | 1.119 | 4.548 | 0.532  |
| RNU7-40P             | -0.378 | 0.769 | 3.289 | -0.820 |
| RNU7-57P//RNU7-189P  | -0.011 | 0.992 | 2.604 | -0.034 |
| RNU7-77P             | -0.592 | 0.664 | 2.951 | -1.658 |
| RNU7-80P             | -0.499 | 0.708 | 2.262 | -1.533 |
| RNU7-96P             | -0.592 | 0.663 | 2.291 | -1.538 |
| RNVU1-14             | -0.241 | 0.846 | 2.716 | -0.711 |
| RNVU1-15             | -0.217 | 0.860 | 6.023 | -0.633 |
| RNVU1-15             | -0.086 | 0.942 | 5.616 | -0.274 |
| RNVU1-3              | -0.130 | 0.914 | 2.800 | -0.455 |
| RNVU1-6              | 0.236  | 1.178 | 2.429 | 0.802  |
| RNVU1-8              | 0.107  | 1.077 | 2.317 | 0.390  |
| RNY3P2               | 0.229  | 1.172 | 1.971 | 0.584  |
| RNY3P9               | -0.346 | 0.787 | 2.557 | -1.353 |
| RNY4P13              | -0.511 | 0.702 | 1.996 | -1.517 |
| RNY4P18              | -0.220 | 0.858 | 4.974 | -0.514 |
| RNY4P19              | 0.748  | 1.680 | 4.391 | 1.847  |
| ROBO2                | 0.746  | 1.677 | 6.263 | 2.480  |
| ROCK1P1              | 1.277  | 2.423 | 1.411 | 2.314  |
| ROCK2                | 0.725  | 1.653 | 6.663 | 2.818  |
| ROM1                 | -0.036 | 0.976 | 4.318 | -0.155 |
| ROPN1L               | 0.156  | 1.114 | 3.668 | 0.296  |
| ROPN1L//RP11-1C1.7   | 0.092  | 1.066 | 2.781 | 0.282  |
| RORB                 | 1.524  | 2.876 | 6.389 | 2.938  |
| ROS1//SLC34A2        | 1.625  | 3.084 | 2.584 | 3.422  |
| RP1-102E24.8         | -0.708 | 0.612 | 2.859 | -2.178 |
| RP11-1008C21.2       | -0.254 | 0.838 | 2.813 | -0.986 |
| RP11-102L12.2        | 0.355  | 1.279 | 4.232 | 1.619  |
| RP11-1049A21.2       | -0.385 | 0.766 | 2.154 | -1.645 |

|                                     |        |       |       |        |
|-------------------------------------|--------|-------|-------|--------|
| RP11-1049H7.2                       | 0.419  | 1.337 | 3.727 | 1.290  |
| RP11-1079K10.4                      | -0.477 | 0.719 | 3.843 | -1.752 |
| RP11-108K3.4                        | -0.634 | 0.644 | 3.485 | -1.912 |
| RP11-108M9.2//RP5-875O13.6          | -0.549 | 0.684 | 3.083 | -1.579 |
| RP11-10A14.4//LOC102724880          | -0.312 | 0.805 | 2.372 | -1.174 |
| RP11-10J21.4                        | 0.131  | 1.095 | 2.638 | 0.431  |
| RP11-10K16.1                        | -0.508 | 0.703 | 4.209 | -1.842 |
| RP11-10L12.4                        | -0.662 | 0.632 | 3.988 | -2.095 |
| RP11-110I1.12                       | -0.442 | 0.736 | 3.840 | -1.722 |
| RP11-110I1.13                       | -0.047 | 0.968 | 3.147 | -0.149 |
| RP11-1114A5.4                       | -0.258 | 0.836 | 3.516 | -0.713 |
| RP11-111F5.1//RP11-204M4.1          | -1.198 | 0.436 | 3.237 | -2.914 |
| RP11-1143G9.4                       | 0.075  | 1.054 | 2.025 | 0.149  |
| RP11-116N8.1                        | -1.598 | 0.330 | 5.871 | -2.587 |
| RP11-118B22.4                       | -0.705 | 0.613 | 5.185 | -1.553 |
| RP1-111C20.3                        | -0.102 | 0.932 | 2.325 | -0.429 |
| RP11-11N9.4                         | -0.434 | 0.740 | 3.908 | -0.890 |
| RP11-120J1.1                        | -0.168 | 0.890 | 3.592 | -0.456 |
| RP11-121A14.3//NEK6                 | -0.076 | 0.949 | 3.081 | -0.282 |
| RP11-122C5.3                        | -0.544 | 0.686 | 3.168 | -1.308 |
| RP11-122K13.12                      | 0.088  | 1.063 | 4.315 | 0.317  |
| RP11-123O10.4                       | 0.325  | 1.253 | 3.574 | 0.877  |
| RP11-124D2.3                        | -0.455 | 0.730 | 2.843 | -1.433 |
| RP11-124N14.3                       | 0.060  | 1.042 | 4.640 | 0.182  |
| RP11-124N2.1                        | 0.182  | 1.134 | 2.474 | 0.636  |
| RP11-134G8.7                        | -0.636 | 0.643 | 2.647 | -2.306 |
| RP11-134G8.8                        | -0.514 | 0.700 | 2.625 | -1.790 |
| RP11-13E1.5                         | -0.195 | 0.874 | 3.347 | -0.767 |
| RP11-143A22.1                       | 0.243  | 1.184 | 2.844 | 0.909  |
| RP11-144G6.4//RP11-96C23.10//RP11-4 | -0.048 | 0.967 | 3.002 | -0.144 |
| RP11-144G6.4//RP11-96C23.10//RP11-4 | 0.037  | 1.026 | 2.799 | 0.112  |
| RP11-14I17.2                        | -0.666 | 0.630 | 3.388 | -1.388 |
| RP11-154D6.1//LINC00472//RP3-331H2  | -0.019 | 0.987 | 3.541 | -0.077 |
| RP11-156E6.1                        | 0.368  | 1.291 | 5.843 | 1.538  |
| RP11-158A14.1                       | -0.434 | 0.740 | 3.091 | -1.125 |
| RP11-158J3.2                        | 0.945  | 1.925 | 2.281 | 1.881  |
| RP11-159F24.6                       | -1.123 | 0.459 | 2.341 | -3.085 |
| RP11-161H23.5//RP11-386G11.10       | -0.151 | 0.901 | 7.898 | -0.580 |
| RP11-164J13.1                       | -0.487 | 0.714 | 3.313 | -1.482 |
| RP11-164P12.4                       | 0.647  | 1.566 | 1.952 | 2.258  |
| RP11-165J3.6                        | 0.246  | 1.186 | 2.522 | 0.917  |
| RP11-166B2.1                        | -0.980 | 0.507 | 3.924 | -2.374 |
| RP11-169E6.1                        | 0.260  | 1.197 | 2.143 | 1.120  |
| RP11-169K16.4                       | -0.243 | 0.845 | 3.621 | -0.977 |
| RP11-16D22.2                        | -0.618 | 0.652 | 2.443 | -1.450 |
| RP11-16P20.3                        | -0.163 | 0.893 | 3.253 | -0.592 |
| RP11-171A24.3                       | 1.466  | 2.763 | 2.608 | 3.473  |
| RP11-174M13.2                       | 0.540  | 1.454 | 1.914 | 1.832  |
| RP11-181B11.1                       | 0.628  | 1.545 | 1.715 | 1.948  |
| RP11-184A2.2                        | 1.338  | 2.528 | 3.501 | 3.398  |

|                   |        |       |       |        |
|-------------------|--------|-------|-------|--------|
| RP11-190P13.2     | -0.291 | 0.817 | 2.821 | -0.913 |
| RP11-196D18.1     | 0.131  | 1.095 | 2.474 | 0.504  |
| RP11-196G18.22    | -0.442 | 0.736 | 3.954 | -1.202 |
| RP11-1C8.4        | 0.634  | 1.552 | 2.596 | 1.987  |
| RP11-203E8.1      | 0.952  | 1.935 | 2.137 | 3.382  |
| RP11-203F10.5     | -0.369 | 0.774 | 3.577 | -0.945 |
| RP11-206L10.4     | 0.069  | 1.049 | 2.719 | 0.234  |
| RP11-207C16.4     | -0.382 | 0.767 | 3.049 | -1.369 |
| RP11-212D3.4      | -0.141 | 0.907 | 2.352 | -0.522 |
| RP11-216M21.7     | -0.394 | 0.761 | 3.895 | -1.513 |
| RP11-229C3.2      | 1.559  | 2.947 | 2.878 | 3.944  |
| RP11-229P13.15    | 0.012  | 1.008 | 2.761 | 0.044  |
| RP1-122P22.2      | -0.394 | 0.761 | 3.259 | -1.439 |
| RP11-22P4.1       | 0.189  | 1.140 | 2.829 | 0.681  |
| RP11-236B18.5     | -0.596 | 0.662 | 2.384 | -1.762 |
| RP11-238K6.2      | 0.283  | 1.216 | 2.214 | 0.932  |
| RP11-244F12.2     | 0.866  | 1.823 | 2.238 | 3.407  |
| RP11-244N9.4//XPA | -0.259 | 0.836 | 4.182 | -0.701 |
| RP11-247L20.4     | 0.860  | 1.815 | 2.538 | 2.405  |
| RP11-250B2.3      | -0.490 | 0.712 | 3.486 | -1.793 |
| RP11-253I19.3     | 0.168  | 1.124 | 4.082 | 0.634  |
| RP11-257K9.8      | 0.185  | 1.137 | 4.210 | 0.625  |
| RP11-259K15.2     | -0.940 | 0.521 | 3.447 | -1.687 |
| RP11-261C10.7     | -0.229 | 0.853 | 4.278 | -0.702 |
| RP11-263K19.4     | 0.059  | 1.042 | 4.852 | 0.260  |
| RP11-264A11.1     | -0.018 | 0.987 | 2.998 | -0.065 |
| RP11-270M14.5     | 0.076  | 1.054 | 2.569 | 0.256  |
| RP11-272L13.3     | 1.126  | 2.182 | 3.549 | 1.871  |
| RP11-272P10.2     | -0.185 | 0.879 | 2.503 | -0.643 |
| RP11-274H2.3      | -0.201 | 0.870 | 2.478 | -0.520 |
| RP11-274J7.2      | -0.714 | 0.610 | 4.113 | -2.030 |
| RP11-275H4.1      | -0.023 | 0.984 | 2.462 | -0.042 |
| RP11-276M12.1     | -0.400 | 0.758 | 2.366 | -1.434 |
| RP1-127H14.3      | 0.452  | 1.368 | 2.559 | 1.826  |
| RP11-281A20.2     | -0.861 | 0.550 | 2.077 | -2.293 |
| RP11-281O15.4     | -0.027 | 0.982 | 3.174 | -0.110 |
| RP11-282K24.3     | -0.009 | 0.994 | 4.588 | -0.025 |
| RP11-283C24.1     | -0.969 | 0.511 | 7.689 | -2.593 |
| RP11-283G6.3      | -0.195 | 0.874 | 4.719 | -0.726 |
| RP11-284M14.1     | -0.292 | 0.817 | 4.524 | -1.138 |
| RP11-286E11.2     | -0.653 | 0.636 | 2.672 | -1.672 |
| RP11-288G11.3     | -1.707 | 0.306 | 5.981 | -3.858 |
| RP11-288I21.1     | 0.116  | 1.084 | 2.872 | 0.438  |
| RP11-290D2.3      | 0.202  | 1.151 | 2.967 | 0.653  |
| RP11-293M10.6     | 0.446  | 1.362 | 3.469 | 1.399  |
| RP11-295K2.3      | 0.684  | 1.607 | 2.870 | 2.419  |
| RP11-305F18.1     | 1.004  | 2.006 | 3.104 | 2.689  |
| RP11-305L7.3      | -0.295 | 0.815 | 3.010 | -0.870 |
| RP11-30J20.1      | 0.732  | 1.661 | 2.080 | 2.011  |
| RP11-30K9.4       | -0.333 | 0.794 | 2.421 | -1.103 |

|                             |        |       |       |        |
|-----------------------------|--------|-------|-------|--------|
| RP11-313F23.4               | 0.446  | 1.363 | 2.382 | 1.458  |
| RP11-314N13.3               | -0.381 | 0.768 | 3.773 | -1.505 |
| RP11-314P15.2               | 1.416  | 2.669 | 3.297 | 3.105  |
| RP11-315E17.1               | -0.807 | 0.572 | 3.990 | -1.752 |
| RP11-315I14.2//LOC101929563 | 0.828  | 1.775 | 2.898 | 2.089  |
| RP11-316M1.12               | -0.568 | 0.675 | 3.838 | -1.858 |
| RP11-317G6.1                | 0.618  | 1.535 | 3.059 | 1.956  |
| RP11-318M2.3                | 0.609  | 1.526 | 4.897 | 2.172  |
| RP11-319G6.3                | -0.296 | 0.815 | 2.527 | -0.822 |
| RP11-320M2.1                | 0.025  | 1.018 | 2.504 | 0.080  |
| RP11-320P7.2                | -1.427 | 0.372 | 5.920 | -1.512 |
| RP11-324O2.6                | 0.329  | 1.256 | 2.421 | 1.111  |
| RP11-326C3.11               | 0.081  | 1.058 | 4.086 | 0.285  |
| RP11-326C3.7                | 0.557  | 1.471 | 2.362 | 1.446  |
| RP11-326I11.4               | 0.419  | 1.337 | 4.785 | 1.661  |
| RP11-32B5.7                 | -0.121 | 0.920 | 3.495 | -0.337 |
| RP11-334E6.3                | 0.809  | 1.752 | 2.159 | 2.264  |
| RP11-334J6.6                | -0.113 | 0.925 | 3.469 | -0.351 |
| RP11-337L12.1               | 0.520  | 1.434 | 2.049 | 1.733  |
| RP11-33B1.3                 | -0.012 | 0.992 | 4.783 | -0.042 |
| RP11-342M1.3                | -0.272 | 0.828 | 2.594 | -1.210 |
| RP11-344N10.5               | 0.120  | 1.087 | 3.178 | 0.408  |
| RP11-348F1.3                | 0.248  | 1.188 | 2.745 | 0.766  |
| RP11-350F4.2                | 0.308  | 1.238 | 4.216 | 1.229  |
| RP11-353N4.5                | -0.391 | 0.762 | 2.604 | -0.933 |
| RP11-355I22.2               | 0.944  | 1.924 | 2.559 | 2.915  |
| RP11-356M20.3               | -0.945 | 0.519 | 2.922 | -2.489 |
| RP11-359J14.2               | 0.391  | 1.311 | 4.011 | 1.378  |
| RP11-360F5.3                | -0.507 | 0.704 | 2.909 | -1.455 |
| RP11-370I10.6//LOC102723866 | 0.056  | 1.039 | 4.218 | 0.175  |
| RP11-374A22.1               | -0.817 | 0.568 | 3.748 | -1.978 |
| RP11-379B18.5//LOC101927056 | -0.486 | 0.714 | 3.124 | -1.548 |
| RP11-380G5.2                | 0.230  | 1.173 | 2.563 | 0.730  |
| RP11-381K20.2//LOC101928005 | -0.506 | 0.704 | 4.712 | -1.785 |
| RP11-383B4.4                | -0.535 | 0.690 | 2.737 | -1.678 |
| RP11-385D13.1               | -0.231 | 0.852 | 2.673 | -0.837 |
| RP11-386G11.3               | 1.120  | 2.174 | 3.312 | 2.455  |
| RP11-386G11.5               | 0.669  | 1.590 | 1.679 | 2.067  |
| RP11-386G21.2               | 0.459  | 1.374 | 3.030 | 1.580  |
| RP11-388P9.2                | 0.315  | 1.244 | 3.975 | 1.325  |
| RP11-389O22.1               | -0.621 | 0.650 | 3.665 | -2.159 |
| RP11-38P22.2                | -0.413 | 0.751 | 3.718 | -0.972 |
| RP11-395I14.2               | -0.134 | 0.911 | 2.432 | -0.434 |
| RP11-396B14.2               | 0.298  | 1.229 | 3.169 | 1.133  |
| RP11-397D12.4               | -0.190 | 0.877 | 3.802 | -0.827 |
| RP11-398K22.12              | 0.227  | 1.171 | 3.399 | 0.892  |
| RP11-3D4.2                  | -0.220 | 0.858 | 3.175 | -0.773 |
| RP11-402N8.1//RP11-449H15.2 | 0.599  | 1.515 | 2.419 | 1.317  |
| RP11-402N8.1//RP11-449H15.2 | 0.562  | 1.476 | 3.228 | 1.276  |
| RP11-402N8.1//RP11-449H15.2 | 0.592  | 1.507 | 4.712 | 1.199  |



|                                    |        |       |       |        |
|------------------------------------|--------|-------|-------|--------|
| RP11-405A12.2                      | 0.687  | 1.610 | 2.767 | 2.310  |
| RP11-407G23.3                      | -0.366 | 0.776 | 4.111 | -1.367 |
| RP11-417L19.2                      | 0.026  | 1.018 | 2.337 | 0.094  |
| RP11-418I22.2//LOC101927026        | -0.176 | 0.885 | 2.509 | -0.671 |
| RP11-430H10.4                      | 0.531  | 1.444 | 2.058 | 1.710  |
| RP11-432J22.2//LOC102724037        | 0.121  | 1.088 | 4.110 | 0.468  |
| RP11-432M8.12                      | 0.883  | 1.844 | 2.459 | 3.813  |
| RP11-432M8.3//RP11-432M8.4//RP11-4 | 0.930  | 1.905 | 3.139 | 3.036  |
| RP11-432M8.3//RP11-432M8.4//RP11-4 | 0.985  | 1.979 | 2.995 | 2.462  |
| RP11-432M8.3//RP11-432M8.4//RP11-4 | 0.688  | 1.611 | 2.979 | 1.656  |
| RP11-436D23.1                      | 0.520  | 1.434 | 2.510 | 1.710  |
| RP11-436H11.5                      | -0.072 | 0.951 | 4.309 | -0.249 |
| RP11-436I9.5                       | 0.162  | 1.118 | 5.141 | 0.531  |
| RP11-445H22.4                      | 0.009  | 1.006 | 2.635 | 0.036  |
| RP11-445N18.5                      | -0.398 | 0.759 | 2.790 | -0.598 |
| RP11-44N11.1                       | -0.740 | 0.599 | 3.055 | -2.285 |
| RP11-458D21.1//RP4-791M13.3        | 0.010  | 1.007 | 4.154 | 0.025  |
| RP11-463O12.3                      | -0.334 | 0.793 | 3.257 | -1.266 |
| RP11-464F9.21                      | -0.050 | 0.966 | 2.222 | -0.102 |
| RP11-466L17.1                      | -0.421 | 0.747 | 3.059 | -1.438 |
| RP11-467H10.2                      | -0.046 | 0.969 | 2.589 | -0.186 |
| RP11-467K18.2                      | -0.043 | 0.970 | 2.332 | -0.153 |
| RP11-468H14.2                      | 0.075  | 1.053 | 2.216 | 0.302  |
| RP11-469A15.2                      | -0.709 | 0.612 | 2.615 | -2.948 |
| RP1-146A15.1                       | -0.697 | 0.617 | 4.492 | -1.660 |
| RP11-473I1.9                       | 0.384  | 1.305 | 6.801 | 1.624  |
| RP11-47I22.1                       | -0.870 | 0.547 | 3.656 | -1.657 |
| RP11-480I12.5                      | 0.417  | 1.336 | 2.204 | 1.498  |
| RP11-484O2.1                       | 0.011  | 1.007 | 3.098 | 0.034  |
| RP11-486G15.2                      | 0.350  | 1.274 | 2.669 | 1.182  |
| RP11-486O12.2                      | -0.619 | 0.651 | 2.862 | -2.120 |
| RP11-486O13.4                      | 0.310  | 1.239 | 3.349 | 0.898  |
| RP11-488C13.6                      | -0.368 | 0.775 | 3.120 | -1.649 |
| RP11-489O18.1                      | -0.917 | 0.530 | 3.778 | -2.820 |
| RP11-490H24.5                      | 0.336  | 1.262 | 4.184 | 1.468  |
| RP11-495K9.7                       | 0.132  | 1.096 | 2.277 | 0.524  |
| RP11-495O11.1                      | 0.653  | 1.572 | 2.626 | 2.434  |
| RP11-496D24.2                      | -0.860 | 0.551 | 2.649 | -2.252 |
| RP11-497E19.2                      | 0.114  | 1.082 | 2.320 | 0.401  |
| RP11-498J9.2                       | 0.025  | 1.018 | 3.017 | 0.094  |
| RP11-49O14.2                       | -0.436 | 0.739 | 3.078 | -1.096 |
| RP11-503E24.2                      | -0.161 | 0.894 | 4.577 | -0.591 |
| RP11-504P24.2                      | -0.629 | 0.647 | 4.842 | -2.257 |
| RP11-505E24.3                      | 0.224  | 1.168 | 2.458 | 0.684  |
| RP11-506M12.1                      | -0.412 | 0.751 | 2.552 | -1.531 |
| RP11-507B12.2//LOC101928828        | 0.108  | 1.078 | 2.605 | 0.447  |
| RP11-507K2.3                       | 0.199  | 1.148 | 2.965 | 0.813  |
| RP11-509E10.1                      | -0.048 | 0.967 | 3.400 | -0.127 |
| RP11-509J21.2                      | -0.463 | 0.726 | 4.006 | -1.035 |
| RP11-513D5.5                       | -0.371 | 0.773 | 2.266 | -1.479 |

|                           |        |       |       |        |
|---------------------------|--------|-------|-------|--------|
| RP11-513I15.6             | 0.641  | 1.559 | 4.913 | 2.065  |
| RP11-514F3.5              | -0.576 | 0.671 | 2.788 | -1.728 |
| RP11-51G5.1               | 0.592  | 1.508 | 2.348 | 1.490  |
| RP11-521D12.1             | -0.553 | 0.682 | 2.173 | -1.197 |
| RP11-527D7.1              | 0.481  | 1.396 | 2.996 | 1.988  |
| RP11-527F13.1             | 0.383  | 1.304 | 2.211 | 1.334  |
| RP11-531A24.5             | 0.048  | 1.034 | 4.271 | 0.176  |
| RP11-536K7.3              | -0.087 | 0.942 | 2.805 | -0.348 |
| RP11-539G18.2             | -0.405 | 0.755 | 3.919 | -1.856 |
| RP11-539I5.1              | 0.235  | 1.177 | 5.818 | 0.904  |
| RP11-543C4.1              | 0.528  | 1.442 | 2.429 | 1.963  |
| RP11-555M1.3              | 0.167  | 1.122 | 2.147 | 0.464  |
| RP11-556E13.1             | -0.281 | 0.823 | 2.715 | -0.867 |
| RP11-556G22.3             | 0.643  | 1.562 | 2.700 | 2.372  |
| RP11-561I11.3             | -0.219 | 0.859 | 3.686 | -0.541 |
| RP11-561O23.8             | 0.888  | 1.851 | 4.416 | 2.062  |
| RP11-562L8.1              | 1.166  | 2.244 | 1.488 | 3.396  |
| RP11-563N6.6              | -0.784 | 0.581 | 2.731 | -1.986 |
| RP11-56G10.2              | 0.491  | 1.406 | 3.953 | 1.719  |
| RP11-574K11.5             | 0.586  | 1.501 | 3.916 | 2.148  |
| RP11-579E24.2             | 0.767  | 1.702 | 2.496 | 2.308  |
| RP11-57H14.2              | -0.042 | 0.971 | 2.391 | -0.147 |
| RP11-582J16.4             | 0.662  | 1.582 | 4.814 | 2.322  |
| RP11-586K2.1              | 0.758  | 1.691 | 3.100 | 2.386  |
| RP11-588P7.1              | 0.339  | 1.265 | 4.903 | 0.665  |
| RP11-589M4.1              | -0.031 | 0.979 | 2.512 | -0.102 |
| RP11-594C13.1             | 0.654  | 1.573 | 2.239 | 1.528  |
| RP11-597D13.7             | -1.213 | 0.431 | 5.309 | -2.217 |
| RP11-5L12.1               | -0.533 | 0.691 | 2.253 | -1.432 |
| RP11-5N11.2               | 0.049  | 1.034 | 3.121 | 0.169  |
| RP11-5N11.3               | 0.454  | 1.369 | 1.886 | 1.353  |
| RP11-5N11.7               | 0.323  | 1.251 | 2.563 | 1.033  |
| RP11-603J24.17            | -0.164 | 0.892 | 3.767 | -0.605 |
| RP11-605F22.2             | 1.003  | 2.004 | 1.992 | 3.243  |
| RP11-617F23.1             | 0.221  | 1.166 | 5.582 | 0.775  |
| RP11-624C23.1             | 0.794  | 1.733 | 2.126 | 2.760  |
| RP11-624G17.3             | -0.237 | 0.849 | 2.596 | -0.933 |
| RP11-627D16.1             | -1.716 | 0.304 | 4.712 | -2.467 |
| RP11-631M21.1//AP005530.2 | -0.982 | 0.506 | 3.227 | -1.569 |
| RP11-638I2.2              | -0.156 | 0.897 | 2.475 | -0.476 |
| RP11-642D21.1             | 0.192  | 1.142 | 3.107 | 0.503  |
| RP11-644F5.11             | -0.349 | 0.785 | 3.898 | -1.471 |
| RP11-64B16.3              | -0.648 | 0.638 | 3.285 | -2.701 |
| RP11-64K12.4              | 0.388  | 1.309 | 3.159 | 1.421  |
| RP11-653B10.1             | 0.930  | 1.906 | 1.812 | 3.133  |
| RP11-660L16.2             | -0.263 | 0.833 | 3.409 | -0.947 |
| RP11-661A12.5             | -0.270 | 0.829 | 3.897 | -1.039 |
| RP11-666A20.4             | -0.001 | 0.999 | 3.638 | -0.002 |
| RP11-66B24.4              | 1.274  | 2.418 | 2.810 | 3.336  |
| RP11-66N11.8              | -0.294 | 0.816 | 2.289 | -1.166 |

|                           |        |       |       |        |
|---------------------------|--------|-------|-------|--------|
| RP11-672F9.1              | 0.255  | 1.194 | 4.211 | 0.806  |
| RP11-673E1.4              | 1.047  | 2.067 | 4.880 | 2.846  |
| RP11-675F6.3              | 0.724  | 1.651 | 2.816 | 1.814  |
| RP11-678G14.3             | 0.247  | 1.187 | 3.025 | 0.965  |
| RP1-167F1.2//LOC102724609 | -0.573 | 0.672 | 2.530 | -2.035 |
| RP11-680F8.4              | -0.755 | 0.593 | 4.163 | -1.815 |
| RP11-685N10.1             | -0.405 | 0.755 | 2.865 | -0.905 |
| RP11-688I9.4              | -0.705 | 0.614 | 4.998 | -1.725 |
| RP11-691N7.6              | -0.164 | 0.893 | 2.680 | -0.550 |
| RP11-692D12.1             | -0.268 | 0.830 | 3.741 | -1.015 |
| RP11-696P8.2              | 0.452  | 1.368 | 3.299 | 1.382  |
| RP11-69A21.2              | 0.050  | 1.035 | 2.502 | 0.147  |
| RP11-701H24.3             | 0.634  | 1.551 | 3.421 | 1.495  |
| RP11-706O15.1             | 0.289  | 1.221 | 2.524 | 0.819  |
| RP11-706O15.7             | 0.504  | 1.418 | 2.460 | 1.257  |
| RP11-707G14.1             | 0.361  | 1.285 | 5.520 | 1.405  |
| RP11-707G14.7             | -0.334 | 0.794 | 2.177 | -1.294 |
| RP11-707P17.2             | -0.728 | 0.604 | 2.929 | -2.064 |
| RP11-70C1.3               | -0.025 | 0.983 | 2.835 | -0.096 |
| RP11-70J12.1              | -0.562 | 0.678 | 4.097 | -1.195 |
| RP11-711K1.7              | 0.484  | 1.399 | 2.178 | 1.745  |
| RP11-712L6.7              | 0.122  | 1.088 | 2.106 | 0.445  |
| RP11-716H6.1              | -0.408 | 0.754 | 2.862 | -1.507 |
| RP11-71N10.1              | -0.752 | 0.594 | 3.119 | -2.147 |
| RP11-723D22.2             | -0.142 | 0.906 | 3.026 | -0.527 |
| RP11-728F11.4             | 0.237  | 1.179 | 2.795 | 0.928  |
| RP11-736K20.5             | 0.560  | 1.474 | 2.675 | 2.631  |
| RP11-737F9.2              | -0.323 | 0.799 | 3.233 | -1.083 |
| RP11-739P1.2              | -0.469 | 0.722 | 4.587 | -1.439 |
| RP11-73E17.2              | -0.298 | 0.813 | 2.209 | -1.155 |
| RP11-745L13.2             | 0.239  | 1.180 | 6.193 | 0.872  |
| RP11-745L13.2             | 0.355  | 1.279 | 2.756 | 0.825  |
| RP11-760H22.2             | -0.688 | 0.621 | 3.071 | -1.998 |
| RP11-762H8.4              | 0.293  | 1.225 | 3.639 | 1.305  |
| RP11-768G7.2              | -0.103 | 0.931 | 4.778 | -0.373 |
| RP11-769N19.2             | 0.389  | 1.309 | 2.250 | 1.268  |
| RP11-774O3.3              | -0.194 | 0.874 | 4.953 | -0.737 |
| RP11-776H12.1             | -0.679 | 0.625 | 3.094 | -2.063 |
| RP11-77P16.4              | -0.038 | 0.974 | 2.818 | -0.102 |
| RP11-77P6.2               | -0.090 | 0.940 | 3.123 | -0.356 |
| RP11-783K16.10//KCNK4     | 0.012  | 1.009 | 2.542 | 0.034  |
| RP11-785H5.2              | -0.492 | 0.711 | 4.412 | -1.388 |
| RP11-798M19.3             | 0.370  | 1.292 | 2.150 | 1.373  |
| RP11-815J21.1             | -0.140 | 0.908 | 2.407 | -0.411 |
| RP11-815J21.2             | -0.084 | 0.943 | 2.673 | -0.289 |
| RP11-819C21.1             | 0.429  | 1.346 | 3.533 | 2.176  |
| RP11-81K13.1              | 0.886  | 1.847 | 2.197 | 3.025  |
| RP11-82L18.2              | 0.389  | 1.309 | 3.227 | 1.527  |
| RP11-839G9.1              | 0.971  | 1.961 | 2.005 | 3.204  |
| RP11-841O20.2             | 0.695  | 1.619 | 4.592 | 1.972  |

|                             |        |       |       |        |
|-----------------------------|--------|-------|-------|--------|
| RP11-85M11.2                | 0.527  | 1.440 | 2.420 | 2.175  |
| RP11-85O21.5                | 0.556  | 1.470 | 2.632 | 1.916  |
| RP11-861E21.2               | -0.623 | 0.649 | 2.920 | -1.630 |
| RP11-862L9.3                | -0.619 | 0.651 | 3.437 | -1.642 |
| RP11-864N7.2                | -0.386 | 0.765 | 8.365 | -1.668 |
| RP11-867G2.8                | 0.472  | 1.387 | 2.854 | 1.492  |
| RP11-867G23.12              | -0.120 | 0.920 | 2.176 | -0.515 |
| RP11-867G23.8//LOC102724064 | -0.122 | 0.919 | 3.129 | -0.474 |
| RP11-86H7.7//LOC102723542   | -0.088 | 0.941 | 3.436 | -0.259 |
| RP1-187B23.1                | -0.360 | 0.779 | 2.369 | -1.102 |
| RP11-883G14.1               | -0.132 | 0.912 | 2.714 | -0.515 |
| RP11-897M7.1                | -0.277 | 0.825 | 3.664 | -1.231 |
| RP11-90D4.3                 | 0.289  | 1.222 | 2.409 | 0.815  |
| RP11-90J19.1                | 0.093  | 1.066 | 6.744 | 0.339  |
| RP11-946L20.2//LOC101927459 | -0.883 | 0.542 | 3.704 | -1.831 |
| RP11-950C14.3               | 0.076  | 1.054 | 3.342 | 0.271  |
| RP11-956J14.1               | -0.020 | 0.986 | 2.173 | -0.064 |
| RP11-958J22.1               | 0.320  | 1.248 | 2.703 | 0.847  |
| RP11-966I7.1                | 0.833  | 1.781 | 2.097 | 1.876  |
| RP11-977B10.2               | -0.362 | 0.778 | 2.771 | -1.189 |
| RP11-989F5.3                | -0.018 | 0.987 | 4.155 | -0.072 |
| RP11-99H8.1                 | 0.160  | 1.117 | 2.327 | 0.603  |
| RP11-9L18.3                 | 0.087  | 1.062 | 2.970 | 0.300  |
| RP11-9M16.2                 | -0.360 | 0.779 | 3.009 | -1.239 |
| RP1-20N2.6//FUCA2           | 0.404  | 1.323 | 2.736 | 1.277  |
| RP1-212P9.2                 | 0.853  | 1.807 | 1.915 | 2.413  |
| RP1-239B22.5                | 0.952  | 1.935 | 2.175 | 2.581  |
| RP1-249F5.3                 | 0.667  | 1.588 | 2.276 | 1.854  |
| RP1-251M9.2                 | 1.028  | 2.040 | 1.718 | 2.840  |
| RP1-269M15.3                | 1.603  | 3.038 | 3.720 | 2.622  |
| RP1-293L6.1                 | 0.340  | 1.266 | 3.302 | 1.205  |
| RP13-216E22.4               | -0.263 | 0.834 | 4.766 | -0.703 |
| RP13-317D12.3               | 0.260  | 1.197 | 3.563 | 0.882  |
| RP13-401N8.1                | -0.520 | 0.697 | 3.301 | -1.345 |
| RP13-578N3.3                | 1.329  | 2.512 | 1.870 | 2.542  |
| RP13-635I23.3               | -0.194 | 0.874 | 2.315 | -0.719 |
| RP1-45C12.1                 | -0.120 | 0.920 | 2.826 | -0.484 |
| RP1-46F2.3                  | -0.251 | 0.840 | 2.192 | -0.627 |
| RP1-506.4                   | -0.432 | 0.741 | 4.266 | -1.331 |
| RP1-69D17.4                 | 0.171  | 1.126 | 2.337 | 0.598  |
| RP1-8B1.4//LOC102725160     | 0.453  | 1.368 | 3.231 | 1.625  |
| RP1-90G24.10                | 0.226  | 1.169 | 4.293 | 0.540  |
| RP1-90G24.6                 | 0.856  | 1.810 | 1.732 | 2.171  |
| RP1-97G4.1                  | 0.358  | 1.282 | 2.746 | 1.078  |
| RP2                         | -0.326 | 0.798 | 5.244 | -1.211 |
| RP3-323P24.3                | -0.097 | 0.935 | 3.509 | -0.315 |
| RP3-325F22.5                | -0.378 | 0.769 | 2.719 | -1.352 |
| RP3-368A4.5                 | -0.451 | 0.732 | 6.971 | -1.841 |
| RP3-377H17.2                | 0.656  | 1.576 | 3.006 | 2.149  |
| RP3-380B8.4                 | 0.360  | 1.284 | 2.333 | 1.308  |

|                                    |        |       |       |        |
|------------------------------------|--------|-------|-------|--------|
| RP3-395P12.2                       | 0.158  | 1.116 | 2.314 | 0.536  |
| RP3-404F18.5                       | -0.399 | 0.759 | 3.911 | -1.496 |
| RP3-405J10.3                       | -0.295 | 0.815 | 3.055 | -1.038 |
| RP3-418C23.2//LOC101927314         | -0.417 | 0.749 | 3.413 | -1.604 |
| RP3-428L16.1                       | 0.598  | 1.513 | 2.240 | 2.126  |
| RP3-462E2.3                        | 0.084  | 1.060 | 3.388 | 0.297  |
| RP3-508I15.18//RP3-508I15.19       | -0.601 | 0.659 | 4.282 | -2.208 |
| RP3-510D11.1                       | 0.108  | 1.078 | 3.051 | 0.403  |
| RP3-525N10.2                       | 0.232  | 1.174 | 7.264 | 0.853  |
| RP4-537K23.4                       | -0.127 | 0.916 | 2.769 | -0.397 |
| RP4-541C22.5                       | 1.139  | 2.203 | 1.918 | 2.834  |
| RP4-564M11.2                       | 1.207  | 2.309 | 3.143 | 2.873  |
| RP4-565E6.1                        | -0.266 | 0.832 | 7.305 | -0.943 |
| RP4-580N22.2                       | -0.348 | 0.786 | 2.797 | -1.570 |
| RP4-613B23.1//LOC101928323         | -0.575 | 0.671 | 4.395 | -1.901 |
| RP4-630C24.3                       | -0.983 | 0.506 | 4.729 | -1.848 |
| RP4-647C14.3                       | 0.072  | 1.051 | 2.939 | 0.235  |
| RP4-666F24.3                       | -0.139 | 0.908 | 1.918 | -0.349 |
| RP4-758J18.7                       | -0.468 | 0.723 | 3.597 | -1.800 |
| RP4-771M4.3                        | -0.467 | 0.723 | 2.809 | -1.266 |
| RP4-782G3.1                        | 1.229  | 2.344 | 3.983 | 2.770  |
| RP4-784A16.5                       | 0.114  | 1.082 | 3.408 | 0.294  |
| RP4-791M13.3                       | -0.487 | 0.713 | 7.501 | -1.739 |
| RP4-803J11.2                       | -0.191 | 0.876 | 2.348 | -0.809 |
| RP4-809F18.2                       | 0.682  | 1.604 | 1.660 | 2.341  |
| RP5-1031D4.2                       | -0.201 | 0.870 | 2.396 | -0.698 |
| RP5-1050D4.2                       | 0.520  | 1.434 | 3.094 | 1.909  |
| RP5-1056L3.1                       | -0.352 | 0.784 | 2.966 | -1.303 |
| RP5-1104E15.6                      | -0.359 | 0.780 | 2.887 | -1.400 |
| RP5-1157M23.2//LOC101929054        | -0.010 | 0.993 | 3.264 | -0.032 |
| RP5-1160K1.8                       | -0.106 | 0.929 | 2.674 | -0.370 |
| RP5-1172N10.2                      | 0.210  | 1.157 | 2.797 | 0.823  |
| RP5-1177I5.3                       | -0.577 | 0.670 | 2.381 | -1.996 |
| RP5-827C21.2                       | 0.770  | 1.706 | 2.757 | 2.302  |
| RP5-857K21.1                       | 0.302  | 1.233 | 2.937 | 0.910  |
| RP5-884C9.2                        | 0.177  | 1.130 | 3.093 | 0.671  |
| RP5-940J5.3                        | -0.767 | 0.588 | 3.090 | -2.841 |
| RP5-965F6.2                        | -0.227 | 0.854 | 3.256 | -0.722 |
| RP5-968J1.1                        | 0.185  | 1.137 | 2.774 | 0.514  |
| RP6-109B7.4                        | -0.498 | 0.708 | 2.850 | -1.831 |
| RPARP-AS1//RP11-18I14.10           | 0.591  | 1.507 | 3.882 | 1.972  |
| RPE65                              | 0.331  | 1.258 | 3.571 | 0.654  |
| RPGR                               | -0.036 | 0.976 | 4.550 | -0.131 |
| RPGRIP1L                           | 0.620  | 1.537 | 4.873 | 1.914  |
| RPH3A                              | 0.919  | 1.891 | 5.867 | 1.918  |
| RPL12                              | -0.053 | 0.964 | 2.582 | -0.202 |
| RPL12//RPL12P4//NBEAL1//RPL12P8//A | -0.158 | 0.896 | 9.898 | -0.831 |
| RPL13//SNORD68                     | -0.114 | 0.924 | 3.725 | -0.455 |
| RPL13A//SNORD35A//SNORD34//SNORI   | -0.033 | 0.977 | 2.974 | -0.135 |
| RPL13AP20//RP11-392P7.2            | -0.134 | 0.912 | 7.186 | -0.593 |

|                                     |        |       |        |        |
|-------------------------------------|--------|-------|--------|--------|
| RPL19                               | -0.274 | 0.827 | 8.464  | -1.415 |
| RPL19P12                            | -0.090 | 0.939 | 3.346  | -0.288 |
| RPL23AP32                           | -0.267 | 0.831 | 5.765  | -0.840 |
| RPL23AP53                           | 0.407  | 1.326 | 4.469  | 1.216  |
| RPL23AP60//XX-C2158C6.2//AL672183.: | 0.629  | 1.546 | 5.582  | 2.056  |
| RPL23AP7//RPL23AP82//AC002055.4     | 1.200  | 2.298 | 3.415  | 2.986  |
| RPL29P2//RP11-199F11.1              | -0.370 | 0.774 | 3.757  | -1.707 |
| RPL39                               | -0.344 | 0.788 | 4.088  | -1.594 |
| RPLP0                               | -0.461 | 0.726 | 3.139  | -2.345 |
| RPP14                               | 0.552  | 1.466 | 4.440  | 2.067  |
| RPP30                               | 0.352  | 1.276 | 4.411  | 1.747  |
| RPP40                               | 0.305  | 1.236 | 3.041  | 1.180  |
| RPRM                                | 0.666  | 1.587 | 3.546  | 2.903  |
| RPRML                               | 0.970  | 1.959 | 2.703  | 2.458  |
| RPS15A                              | -0.179 | 0.883 | 4.939  | -0.558 |
| RPS15AP10                           | -0.111 | 0.926 | 3.208  | -0.403 |
| RPS19                               | -0.478 | 0.718 | 8.146  | -2.035 |
| RPS2//SNORA64//AC005363.9           | -0.442 | 0.736 | 3.371  | -1.365 |
| RPS2//SNORA64//RPS2P55//RPS2P46//I  | -0.229 | 0.853 | 9.475  | -0.930 |
| RPS2//SNORA64//RPS2P7//RPS2P46//RI  | -0.095 | 0.936 | 10.794 | -0.436 |
| RPS25                               | -0.214 | 0.862 | 5.080  | -0.797 |
| RPS26//LOC100996747//LOC101929876   | 0.320  | 1.248 | 3.171  | 1.304  |
| RPS27                               | -0.263 | 0.833 | 10.423 | -1.473 |
| RPS5                                | -0.574 | 0.672 | 8.619  | -2.913 |
| RPS6KA2-IT1                         | -0.563 | 0.677 | 4.401  | -2.094 |
| RPS6KA6                             | 0.447  | 1.363 | 4.596  | 1.247  |
| RPS6KC1                             | 0.440  | 1.357 | 6.056  | 2.368  |
| RPS6KL1                             | 0.179  | 1.132 | 4.290  | 0.696  |
| RPSAP52                             | -0.190 | 0.877 | 2.185  | -0.488 |
| RPSAP58                             | -0.269 | 0.830 | 2.158  | -0.976 |
| RPUSD1                              | 0.070  | 1.050 | 3.996  | 0.283  |
| RRAD                                | -0.433 | 0.741 | 2.720  | -1.262 |
| RRAGB                               | 0.226  | 1.170 | 5.179  | 1.002  |
| RRAS                                | -0.106 | 0.929 | 6.426  | -0.442 |
| RRBP1                               | -0.639 | 0.642 | 6.778  | -2.406 |
| RREB1                               | -0.349 | 0.785 | 5.178  | -1.584 |
| RRH                                 | 0.623  | 1.541 | 2.448  | 2.472  |
| RRM2B                               | 0.229  | 1.172 | 5.949  | 0.922  |
| RRN3                                | 0.464  | 1.380 | 5.696  | 1.653  |
| RRN3P2                              | -0.270 | 0.830 | 3.239  | -0.596 |
| RRN3P3//LOC101060405//RP11-21M24    | 0.242  | 1.183 | 4.424  | 0.703  |
| RRNAD1                              | -0.494 | 0.710 | 3.852  | -2.139 |
| RRP12                               | 0.089  | 1.064 | 4.848  | 0.320  |
| RRP7B                               | -0.786 | 0.580 | 3.069  | -1.107 |
| RSAD2                               | 0.427  | 1.344 | 2.659  | 1.385  |
| RSC1A1//DDI2                        | 0.143  | 1.105 | 5.579  | 0.614  |
| RSPH1                               | 0.200  | 1.149 | 3.721  | 0.587  |
| RSPH3                               | 0.325  | 1.253 | 5.519  | 1.416  |
| RSPH4A                              | -0.099 | 0.934 | 2.936  | -0.225 |
| RSPO2                               | 1.161  | 2.236 | 3.821  | 2.547  |

|              |        |       |        |        |
|--------------|--------|-------|--------|--------|
| RSPO3        | 1.550  | 2.928 | 2.748  | 4.173  |
| RTCA         | 0.271  | 1.207 | 5.284  | 1.208  |
| RTF1         | 0.529  | 1.443 | 7.159  | 1.982  |
| RTKN         | -1.114 | 0.462 | 5.907  | -3.138 |
| RTKN2        | 0.550  | 1.464 | 1.920  | 1.516  |
| RTN1         | 0.636  | 1.554 | 7.437  | 2.310  |
| RTN2         | 0.609  | 1.525 | 4.283  | 1.620  |
| RTN3         | 0.327  | 1.254 | 9.054  | 1.689  |
| RTN4IP1      | 0.052  | 1.037 | 4.000  | 0.234  |
| RTN4R        | 0.353  | 1.277 | 3.171  | 1.294  |
| RTN4RL1      | 1.258  | 2.392 | 4.439  | 2.480  |
| RTN4RL2      | 0.449  | 1.365 | 2.474  | 1.180  |
| RTP1         | 0.529  | 1.443 | 1.938  | 1.500  |
| RTP4         | -0.242 | 0.846 | 3.009  | -0.853 |
| RTP5//CXXC11 | 0.325  | 1.253 | 3.057  | 1.170  |
| RTTN         | -0.649 | 0.638 | 5.847  | -1.991 |
| RUNDC1       | 0.383  | 1.304 | 5.489  | 1.543  |
| RUNDC3A      | 0.914  | 1.884 | 7.695  | 2.369  |
| RUNDC3B      | 0.531  | 1.445 | 4.293  | 1.557  |
| RUNX1-IT1    | -0.356 | 0.781 | 2.608  | -1.049 |
| RUNX1T1      | 0.608  | 1.524 | 4.538  | 2.209  |
| RUNX2        | -0.145 | 0.904 | 2.741  | -0.611 |
| RUSC1        | 0.430  | 1.347 | 3.950  | 1.748  |
| RUSC2        | 0.357  | 1.281 | 6.591  | 1.651  |
| RWDD2A       | 0.557  | 1.471 | 5.391  | 2.192  |
| RWDD2B       | 0.516  | 1.430 | 3.281  | 1.450  |
| RXFP1        | 2.521  | 5.741 | 2.785  | 3.948  |
| RXRG         | -0.738 | 0.600 | 4.425  | -3.638 |
| RYR2         | 1.285  | 2.436 | 5.987  | 2.612  |
| RYR3         | -0.363 | 0.777 | 6.445  | -1.431 |
| S100A1       | -0.161 | 0.894 | 4.044  | -0.694 |
| S100A10      | -0.360 | 0.779 | 3.344  | -1.399 |
| S100A11      | 0.039  | 1.027 | 4.012  | 0.119  |
| S100A12      | -0.581 | 0.668 | 4.126  | -0.696 |
| S100A16      | -0.102 | 0.932 | 4.555  | -0.378 |
| S100A3       | 0.554  | 1.468 | 2.429  | 1.590  |
| S100A6       | -0.248 | 0.842 | 4.850  | -1.257 |
| S100A8       | 0.229  | 1.172 | 4.901  | 0.380  |
| S100A9       | 0.066  | 1.047 | 5.300  | 0.101  |
| S100B        | -0.967 | 0.512 | 10.047 | -2.507 |
| S100PBP      | -0.396 | 0.760 | 3.812  | -1.461 |
| S1PR5        | -0.935 | 0.523 | 5.321  | -2.533 |
| SACS         | 0.395  | 1.315 | 7.228  | 1.915  |
| SAE1         | 0.245  | 1.185 | 3.460  | 1.054  |
| SALL1        | -1.015 | 0.495 | 6.244  | -4.053 |
| SALL2        | -0.548 | 0.684 | 6.064  | -2.030 |
| SALL3        | -0.411 | 0.752 | 3.980  | -1.340 |
| SAMD1        | -0.419 | 0.748 | 5.210  | -2.081 |
| SAMD11       | -0.340 | 0.790 | 3.820  | -1.196 |
| SAMD12       | 0.355  | 1.279 | 5.598  | 1.547  |

|                              |        |       |        |        |
|------------------------------|--------|-------|--------|--------|
| SAMD15                       | 0.081  | 1.058 | 3.025  | 0.321  |
| SAMD4A                       | -0.586 | 0.666 | 5.368  | -2.230 |
| SAMD5                        | 0.394  | 1.314 | 2.933  | 1.370  |
| SAMD9                        | -0.100 | 0.933 | 3.854  | -0.449 |
| SAMD9L                       | -0.259 | 0.835 | 4.919  | -0.857 |
| SAMHD1                       | -0.481 | 0.716 | 7.676  | -2.005 |
| SAP25//LRCH4                 | -0.562 | 0.677 | 3.201  | -1.840 |
| SAPCD1//MSH5-SAPCD1          | -0.215 | 0.861 | 3.174  | -0.767 |
| SAPCD1-AS1//XXbac-BPG32J3.18 | 0.028  | 1.020 | 2.377  | 0.099  |
| SASH1                        | -0.478 | 0.718 | 8.037  | -1.926 |
| SASH3                        | -0.559 | 0.679 | 4.113  | -1.735 |
| SAT1                         | 0.305  | 1.236 | 7.847  | 1.080  |
| SATB1                        | 0.579  | 1.494 | 5.850  | 2.356  |
| SATB2                        | 1.123  | 2.178 | 6.541  | 2.547  |
| SATL1                        | 0.282  | 1.215 | 2.750  | 0.846  |
| SBK1                         | 0.608  | 1.524 | 4.124  | 1.639  |
| SBNO1                        | 0.286  | 1.220 | 7.469  | 1.457  |
| SBNO2                        | -0.077 | 0.948 | 4.782  | -0.262 |
| SBSPON                       | -1.281 | 0.412 | 6.021  | -2.020 |
| SC22CB-1E7.1                 | -0.390 | 0.763 | 5.696  | -1.457 |
| SCAI                         | 0.953  | 1.937 | 5.646  | 3.042  |
| SCAMP1                       | 0.384  | 1.305 | 7.740  | 1.774  |
| SCAMP2                       | -0.706 | 0.613 | 6.101  | -2.759 |
| SCAMP4                       | -0.590 | 0.664 | 4.356  | -2.362 |
| SCAMP5                       | 0.659  | 1.579 | 7.671  | 2.117  |
| SCARA3                       | 0.500  | 1.414 | 7.427  | 1.595  |
| SCARNA1                      | -0.152 | 0.900 | 2.169  | -0.649 |
| SCARNA10                     | -0.606 | 0.657 | 8.615  | -2.183 |
| SCARNA11                     | -0.062 | 0.958 | 6.856  | -0.171 |
| SCARNA14                     | 0.097  | 1.070 | 3.203  | 0.250  |
| SCARNA2                      | -0.390 | 0.763 | 5.708  | -1.552 |
| SCARNA20                     | -0.148 | 0.902 | 4.436  | -0.359 |
| SCARNA21                     | 0.252  | 1.191 | 5.237  | 0.800  |
| SCARNA22                     | 0.314  | 1.243 | 5.650  | 1.108  |
| SCARNA27                     | 0.113  | 1.081 | 5.216  | 0.342  |
| SCARNA3                      | -0.249 | 0.842 | 6.747  | -0.810 |
| SCARNA4                      | 0.208  | 1.155 | 7.685  | 0.543  |
| SCARNA5                      | 0.259  | 1.197 | 8.099  | 0.423  |
| SCARNA6                      | -0.172 | 0.888 | 7.408  | -0.798 |
| SCARNA7                      | -0.255 | 0.838 | 7.772  | -0.962 |
| SCARNA8                      | 0.185  | 1.137 | 4.759  | 0.587  |
| SCART1//RP11-108K14.4        | -0.023 | 0.984 | 2.695  | -0.082 |
| SCCPDH                       | -0.617 | 0.652 | 7.533  | -2.463 |
| SCD                          | -0.950 | 0.518 | 10.462 | -3.063 |
| SCFD2                        | 0.195  | 1.144 | 6.677  | 0.706  |
| SCG2                         | 0.293  | 1.225 | 5.299  | 0.718  |
| SCG3                         | 0.582  | 1.497 | 7.889  | 1.812  |
| SCG5                         | 0.389  | 1.310 | 4.919  | 1.488  |
| SCIMP                        | -0.509 | 0.703 | 4.037  | -1.199 |
| SCIN                         | -0.619 | 0.651 | 5.881  | -1.169 |



|                                 |        |       |       |        |
|---------------------------------|--------|-------|-------|--------|
| SCML1                           | 0.585  | 1.500 | 3.498 | 2.462  |
| SCML2                           | 0.224  | 1.168 | 2.302 | 1.086  |
| SCN11A                          | -0.452 | 0.731 | 2.374 | -1.254 |
| SCN1A                           | 1.288  | 2.442 | 6.693 | 2.353  |
| SCN1B                           | 0.747  | 1.678 | 6.831 | 2.158  |
| SCN2A                           | 1.718  | 3.289 | 5.957 | 2.743  |
| SCN2B                           | 1.078  | 2.111 | 6.114 | 2.314  |
| SCN3A                           | 0.258  | 1.196 | 6.065 | 0.661  |
| SCN3B                           | 1.435  | 2.703 | 5.589 | 2.486  |
| SCN4B                           | 0.798  | 1.739 | 4.726 | 1.907  |
| SCN7A                           | -0.198 | 0.872 | 3.828 | -0.396 |
| SCN8A                           | 1.474  | 2.777 | 6.601 | 2.306  |
| SCN8A                           | 1.393  | 2.627 | 5.392 | 2.013  |
| SCN9A                           | -0.250 | 0.841 | 3.898 | -0.688 |
| SCNN1D                          | -0.125 | 0.917 | 3.476 | -0.458 |
| SCOC-AS1//RP11-425I13.3         | -0.460 | 0.727 | 2.775 | -1.536 |
| SCRT1                           | 1.456  | 2.744 | 3.359 | 2.563  |
| SCRT2                           | 0.244  | 1.185 | 2.961 | 0.945  |
| SCUBE1                          | -0.152 | 0.900 | 2.886 | -0.491 |
| SCUBE2                          | -0.426 | 0.744 | 3.819 | -1.501 |
| SCX//SCXB                       | -0.086 | 0.942 | 2.771 | -0.211 |
| SDAD1                           | 0.398  | 1.318 | 6.412 | 1.945  |
| SDC4//ROS1                      | -0.409 | 0.753 | 8.065 | -0.980 |
| SDCBP                           | 0.271  | 1.206 | 5.143 | 1.057  |
| SDCBP2//FKBP1A-SDCBP2           | 0.743  | 1.674 | 3.802 | 2.833  |
| SDCBP2-AS1                      | 0.097  | 1.070 | 3.443 | 0.360  |
| SDF2L1                          | -0.529 | 0.693 | 4.246 | -1.502 |
| SDHAP1//SDHAP2                  | -0.034 | 0.977 | 5.069 | -0.091 |
| SDHAP2//LINC00969               | -0.445 | 0.735 | 4.665 | -1.268 |
| SDHAP2//LINC00969               | -0.742 | 0.598 | 4.890 | -0.959 |
| SDHAP2//LINC00969               | -0.230 | 0.853 | 4.410 | -0.712 |
| SDHAP2//LINC00969//LOC102725383 | -0.498 | 0.708 | 3.917 | -1.459 |
| SDHC//RP11-122G18.5             | 0.149  | 1.109 | 4.655 | 0.610  |
| SDIM1                           | 0.960  | 1.945 | 2.019 | 3.594  |
| SDPR                            | 0.018  | 1.013 | 5.365 | 0.051  |
| SDR16C5                         | 0.994  | 1.991 | 2.618 | 2.754  |
| SDS                             | 0.347  | 1.271 | 3.240 | 1.294  |
| SDSL                            | -0.393 | 0.762 | 4.855 | -1.503 |
| SEC11A                          | -0.331 | 0.795 | 4.661 | -1.519 |
| SEC11C                          | -0.521 | 0.697 | 6.898 | -2.240 |
| SEC14L1P1                       | 0.187  | 1.138 | 2.925 | 0.446  |
| SEC14L5                         | -0.441 | 0.736 | 6.002 | -1.121 |
| SEC14L6                         | -0.180 | 0.883 | 2.790 | -0.518 |
| SEC16B//RP4-798P15.3            | 0.613  | 1.529 | 3.211 | 2.828  |
| SEC16B//RP4-798P15.3            | -0.565 | 0.676 | 2.527 | -2.119 |
| SEC16B//RP4-798P15.3            | -0.270 | 0.829 | 2.552 | -0.673 |
| SEC23A                          | 0.435  | 1.352 | 6.459 | 2.042  |
| SEC24D                          | 0.693  | 1.616 | 5.004 | 2.308  |
| SECTM1                          | 0.404  | 1.323 | 4.280 | 0.859  |
| SEH1L                           | 0.452  | 1.368 | 7.851 | 1.736  |

|                           |        |       |       |        |
|---------------------------|--------|-------|-------|--------|
| SEL1L3                    | 0.558  | 1.472 | 4.848 | 1.762  |
| SELE                      | -0.049 | 0.966 | 2.840 | -0.057 |
| SELENBP1                  | -0.202 | 0.869 | 4.908 | -0.727 |
| SELL                      | -0.804 | 0.573 | 4.967 | -2.212 |
| SELPLG                    | -1.131 | 0.457 | 5.167 | -3.290 |
| SEMA3A                    | 0.685  | 1.607 | 4.739 | 2.599  |
| SEMA3B//MIR6872           | -0.948 | 0.518 | 6.835 | -1.985 |
| SEMA3B-AS1//U73167.7      | -0.412 | 0.752 | 3.210 | -1.119 |
| SEMA3C                    | -0.301 | 0.812 | 5.955 | -1.096 |
| SEMA3D                    | -0.173 | 0.887 | 4.942 | -0.564 |
| SEMA3E                    | 0.480  | 1.395 | 5.108 | 1.920  |
| SEMA3F                    | 0.097  | 1.069 | 3.025 | 0.331  |
| SEMA3G                    | 0.354  | 1.278 | 3.293 | 1.275  |
| SEMA4B                    | -0.395 | 0.761 | 4.236 | -1.685 |
| SEMA4C                    | -0.449 | 0.733 | 5.029 | -1.933 |
| SEMA4D                    | -0.905 | 0.534 | 5.951 | -2.636 |
| SEMA4F                    | 0.253  | 1.191 | 4.548 | 0.887  |
| SEMA4G                    | 0.236  | 1.177 | 3.499 | 0.868  |
| SEMA5A                    | -0.449 | 0.732 | 6.526 | -1.930 |
| SEMA5B                    | 0.254  | 1.192 | 4.002 | 0.911  |
| SEMA6A                    | -0.895 | 0.538 | 6.096 | -2.886 |
| SEMA6B                    | 1.039  | 2.055 | 5.379 | 2.770  |
| SEMA6C                    | 0.527  | 1.441 | 2.544 | 2.154  |
| SEMA6D                    | -0.200 | 0.870 | 6.870 | -0.943 |
| SENP5                     | 0.197  | 1.146 | 6.856 | 1.051  |
| SEPHS2                    | 0.516  | 1.430 | 5.290 | 2.690  |
| SEPN1                     | -0.247 | 0.843 | 7.040 | -1.149 |
| SEPP1                     | -1.263 | 0.417 | 4.850 | -3.522 |
| SEPSECS                   | -0.372 | 0.773 | 5.822 | -1.401 |
| SEPT10                    | -0.703 | 0.614 | 6.167 | -1.999 |
| SEPT11                    | 0.468  | 1.383 | 6.045 | 2.076  |
| SEPT12                    | -0.046 | 0.968 | 2.612 | -0.176 |
| SEPT3                     | 0.934  | 1.910 | 9.240 | 2.413  |
| SEPT4                     | -0.500 | 0.707 | 7.136 | -1.692 |
| SEPT5-GP1BB//GP1BB//SEPT5 | 0.671  | 1.592 | 5.393 | 1.639  |
| SEPT6                     | 0.278  | 1.213 | 5.135 | 1.278  |
| SEPT9                     | 0.057  | 1.041 | 6.935 | 0.303  |
| SERAC1                    | 0.011  | 1.008 | 5.098 | 0.055  |
| SERGEF                    | 0.270  | 1.206 | 4.367 | 1.230  |
| SERHL                     | -0.618 | 0.652 | 2.408 | -1.512 |
| SERINC2                   | -0.205 | 0.867 | 3.230 | -0.999 |
| SERINC5                   | -0.741 | 0.598 | 6.890 | -2.733 |
| SERP2                     | 0.256  | 1.194 | 4.568 | 1.147  |
| SERPINA1                  | -0.126 | 0.917 | 2.710 | -0.291 |
| SERPINA3//RP11-986E7.7    | 0.775  | 1.711 | 5.019 | 1.148  |
| SERPINA5                  | 0.236  | 1.178 | 2.445 | 0.712  |
| SERPINB1                  | 0.085  | 1.061 | 5.535 | 0.235  |
| SERPINB6                  | -0.559 | 0.679 | 5.453 | -2.468 |
| SERPINB8                  | -0.233 | 0.851 | 3.458 | -0.694 |
| SERPINB9                  | 0.021  | 1.015 | 6.070 | 0.080  |

|                          |        |       |       |        |
|--------------------------|--------|-------|-------|--------|
| SERPINB9P1//RP11-420G6.4 | -0.136 | 0.910 | 3.427 | -0.421 |
| SERPIND1                 | 0.549  | 1.463 | 2.846 | 1.224  |
| SERPINE1                 | -0.994 | 0.502 | 4.291 | -1.426 |
| SERPINF1                 | 1.135  | 2.196 | 6.405 | 1.883  |
| SERPING1                 | 0.297  | 1.229 | 6.374 | 1.103  |
| SERPINH1                 | -0.313 | 0.805 | 5.473 | -0.754 |
| SERPINI1                 | 0.635  | 1.553 | 8.433 | 2.074  |
| SERPINI2                 | -0.836 | 0.560 | 2.971 | -2.087 |
| SERTAD4                  | 0.360  | 1.283 | 3.462 | 1.388  |
| SERTAD4-AS1              | -0.876 | 0.545 | 3.823 | -2.924 |
| SERTM1                   | 1.439  | 2.711 | 4.553 | 2.533  |
| SESN1                    | 0.205  | 1.153 | 6.723 | 0.882  |
| SESN2                    | 0.364  | 1.287 | 4.575 | 1.165  |
| SETBP1                   | 0.667  | 1.588 | 4.613 | 2.452  |
| SETDB2                   | 0.077  | 1.055 | 4.969 | 0.348  |
| SEZ6                     | 0.358  | 1.282 | 3.939 | 1.110  |
| SEZ6L                    | 0.405  | 1.324 | 6.413 | 1.188  |
| SEZ6L2                   | 0.602  | 1.518 | 6.633 | 1.713  |
| SFMBT2                   | -0.591 | 0.664 | 6.534 | -2.848 |
| SFN                      | 0.817  | 1.762 | 4.245 | 1.544  |
| SFR1                     | -0.527 | 0.694 | 3.669 | -1.556 |
| SFRP1                    | -0.467 | 0.723 | 4.223 | -1.976 |
| SFRP2                    | -0.326 | 0.797 | 5.544 | -0.659 |
| SFRP4                    | -0.144 | 0.905 | 2.931 | -0.577 |
| SFRP5                    | -0.279 | 0.824 | 3.379 | -0.557 |
| SFT2D2                   | -0.367 | 0.775 | 6.747 | -1.563 |
| SGCZ                     | 1.021  | 2.029 | 3.802 | 2.853  |
| SGIP1                    | 0.334  | 1.261 | 6.555 | 1.650  |
| SGK1                     | -1.012 | 0.496 | 6.468 | -2.721 |
| SGK2                     | -0.896 | 0.537 | 4.459 | -1.774 |
| SGK223//PRAGMIN          | 0.544  | 1.458 | 4.267 | 1.815  |
| SGK494                   | 0.189  | 1.140 | 4.444 | 0.763  |
| SGMS2                    | -0.148 | 0.902 | 3.431 | -0.609 |
| SGPP2                    | 0.320  | 1.248 | 4.886 | 0.741  |
| SGSM1                    | 0.432  | 1.349 | 5.091 | 1.214  |
| SGSM2                    | 0.482  | 1.396 | 6.680 | 1.798  |
| SGTB                     | 0.722  | 1.649 | 7.721 | 2.416  |
| SH2B2                    | 0.159  | 1.116 | 3.185 | 0.673  |
| SH2D5                    | 0.348  | 1.273 | 3.047 | 1.193  |
| SH3BGR                   | -0.364 | 0.777 | 4.925 | -1.174 |
| SH3BGRL2                 | 0.632  | 1.550 | 8.616 | 2.058  |
| SH3BGRL3                 | -0.369 | 0.775 | 5.093 | -1.846 |
| SH3BP1                   | -0.110 | 0.927 | 2.605 | -0.404 |
| SH3BP2                   | -0.138 | 0.909 | 3.438 | -0.540 |
| SH3BP4                   | -0.689 | 0.620 | 4.450 | -2.834 |
| SH3BP5-AS1               | -0.697 | 0.617 | 3.826 | -2.279 |
| SH3D21                   | 0.144  | 1.105 | 3.844 | 0.414  |
| SH3GL1                   | 0.029  | 1.020 | 3.133 | 0.103  |
| SH3GL2                   | 1.395  | 2.630 | 7.047 | 2.593  |
| SH3PXD2B                 | -0.401 | 0.757 | 5.465 | -1.505 |

|                    |        |       |       |        |
|--------------------|--------|-------|-------|--------|
| SH3RF2             | 0.646  | 1.565 | 2.118 | 2.424  |
| SH3TC1             | -0.482 | 0.716 | 3.085 | -2.014 |
| SH3TC2             | -1.193 | 0.437 | 4.977 | -2.506 |
| SHANK1             | 1.194  | 2.288 | 4.431 | 2.254  |
| SHANK2             | 0.360  | 1.284 | 2.546 | 1.244  |
| SHANK2             | -0.011 | 0.992 | 2.275 | -0.048 |
| SHANK3             | 0.919  | 1.890 | 5.457 | 2.095  |
| SHB//RP11-613M10.9 | -0.330 | 0.795 | 4.909 | -1.246 |
| SHC1               | 0.114  | 1.082 | 5.744 | 0.487  |
| SHC3               | 1.360  | 2.567 | 6.587 | 2.726  |
| SHC4               | -1.042 | 0.486 | 5.350 | -2.651 |
| SHD                | 0.165  | 1.121 | 3.120 | 0.555  |
| SHISA2             | -0.735 | 0.601 | 3.631 | -2.193 |
| SHISA3             | -0.036 | 0.976 | 2.754 | -0.136 |
| SHISA5             | 0.360  | 1.283 | 3.446 | 1.467  |
| SHISA6             | -0.882 | 0.543 | 6.950 | -1.736 |
| SHISA7             | 0.220  | 1.165 | 4.415 | 0.801  |
| SHISA9             | 0.723  | 1.650 | 4.770 | 1.845  |
| SHKBP1             | -0.574 | 0.672 | 5.219 | -2.134 |
| SHMT1//MIR6778     | -0.148 | 0.902 | 4.167 | -0.609 |
| SHROOM1            | -1.154 | 0.449 | 4.872 | -4.059 |
| SHROOM2            | 0.552  | 1.466 | 3.075 | 2.219  |
| SHROOM3            | -0.121 | 0.920 | 3.631 | -0.417 |
| SHROOM4            | -0.806 | 0.572 | 4.958 | -2.205 |
| SIAH2              | 0.198  | 1.147 | 5.515 | 0.761  |
| SIAH3              | 0.905  | 1.873 | 3.268 | 2.084  |
| SIDT1              | 0.324  | 1.252 | 4.666 | 1.017  |
| SIDT2              | -0.577 | 0.670 | 6.211 | -2.500 |
| SIGLEC10           | -0.485 | 0.714 | 5.213 | -1.068 |
| SIGLEC11           | 0.404  | 1.323 | 2.317 | 1.567  |
| SIGLEC14           | 0.022  | 1.015 | 3.153 | 0.047  |
| SIGLEC7            | -0.253 | 0.839 | 3.626 | -0.578 |
| SIGLEC8            | -0.806 | 0.572 | 4.363 | -2.355 |
| SIGLEC9            | 0.283  | 1.216 | 4.027 | 0.582  |
| SIK1               | 0.400  | 1.320 | 5.212 | 0.988  |
| SIK3-IT1           | -0.462 | 0.726 | 3.837 | -1.170 |
| SIN3B              | 0.447  | 1.363 | 6.214 | 2.034  |
| SIPA1L1            | 0.443  | 1.360 | 6.683 | 1.754  |
| SIRPA              | 0.495  | 1.409 | 7.787 | 2.360  |
| SIRPB2             | -0.393 | 0.762 | 3.788 | -1.347 |
| SIRT2              | -0.827 | 0.564 | 5.615 | -3.053 |
| SIRT3              | 0.244  | 1.185 | 4.022 | 1.212  |
| SIRT4              | 0.347  | 1.272 | 1.992 | 1.378  |
| SIRT5              | 0.582  | 1.497 | 5.006 | 2.649  |
| SIX4               | 0.519  | 1.433 | 2.766 | 1.794  |
| SIX5               | -0.118 | 0.921 | 2.226 | -0.446 |
| SKAP2              | -0.310 | 0.807 | 6.412 | -1.498 |
| SLA                | -0.189 | 0.877 | 4.911 | -0.537 |
| SLAIN1             | -0.808 | 0.571 | 7.776 | -2.450 |
| SLAMF8             | 0.481  | 1.396 | 4.386 | 0.882  |

|                     |        |       |       |        |
|---------------------|--------|-------|-------|--------|
| SLBP                | 0.252  | 1.191 | 5.776 | 1.046  |
| SLC10A4             | -0.352 | 0.784 | 3.653 | -0.558 |
| SLC10A5             | 0.262  | 1.199 | 2.763 | 0.949  |
| SLC11A1             | -0.350 | 0.785 | 4.777 | -0.557 |
| SLC12A4             | -0.071 | 0.952 | 6.218 | -0.282 |
| SLC12A5             | 1.370  | 2.585 | 6.183 | 1.800  |
| SLC12A8             | -0.045 | 0.970 | 3.258 | -0.156 |
| SLC12A9             | -0.420 | 0.748 | 3.480 | -1.937 |
| SLC13A3             | -0.636 | 0.643 | 5.129 | -1.555 |
| SLC13A4             | 1.369  | 2.583 | 3.605 | 2.092  |
| SLC13A5             | 0.870  | 1.827 | 3.932 | 2.212  |
| SLC14A1             | -1.031 | 0.489 | 9.047 | -1.933 |
| SLC15A2             | 0.175  | 1.129 | 5.644 | 0.627  |
| SLC15A3             | -0.336 | 0.792 | 3.918 | -1.425 |
| SLC16A10            | 0.450  | 1.366 | 4.225 | 1.906  |
| SLC16A12            | 0.688  | 1.611 | 2.373 | 1.718  |
| SLC16A14            | 0.618  | 1.535 | 4.077 | 1.942  |
| SLC16A3//MIR6787    | -0.340 | 0.790 | 5.227 | -0.882 |
| SLC16A4             | -0.267 | 0.831 | 4.842 | -0.999 |
| SLC16A6             | 0.041  | 1.028 | 4.195 | 0.116  |
| SLC16A7             | 0.352  | 1.276 | 4.531 | 1.250  |
| SLC16A9             | -0.698 | 0.617 | 5.381 | -2.054 |
| SLC17A5             | 0.284  | 1.218 | 5.835 | 1.121  |
| SLC17A6             | -0.123 | 0.918 | 5.175 | -0.170 |
| SLC17A7             | 3.036  | 8.199 | 5.603 | 3.410  |
| SLC17A8             | 0.444  | 1.360 | 2.429 | 1.837  |
| SLC18A3             | -0.272 | 0.828 | 3.371 | -0.608 |
| SLC19A2             | 0.407  | 1.326 | 5.431 | 1.497  |
| SLC1A1              | 0.729  | 1.658 | 5.933 | 2.151  |
| SLC1A2              | 0.749  | 1.681 | 9.287 | 2.475  |
| SLC1A5              | -0.442 | 0.736 | 4.644 | -1.185 |
| SLC1A6              | 0.632  | 1.549 | 2.687 | 1.942  |
| SLC22A10            | 0.671  | 1.592 | 1.773 | 2.186  |
| SLC22A15            | -0.590 | 0.664 | 5.450 | -2.190 |
| SLC22A3             | -0.535 | 0.690 | 3.410 | -1.813 |
| SLC22A4             | 0.101  | 1.072 | 3.547 | 0.367  |
| SLC22A6             | 0.074  | 1.052 | 3.422 | 0.227  |
| SLC22A9             | 0.472  | 1.387 | 2.736 | 1.585  |
| SLC24A1             | -0.096 | 0.936 | 3.122 | -0.325 |
| SLC24A2             | 0.097  | 1.069 | 9.042 | 0.474  |
| SLC24A3             | 0.017  | 1.012 | 5.111 | 0.052  |
| SLC24A4             | -0.716 | 0.609 | 4.168 | -2.063 |
| SLC25A1             | -0.857 | 0.552 | 5.905 | -3.497 |
| SLC25A12            | 0.885  | 1.846 | 6.238 | 2.440  |
| SLC25A13            | -0.851 | 0.554 | 5.431 | -2.227 |
| SLC25A14            | 0.435  | 1.352 | 5.344 | 1.714  |
| SLC25A16//LINC00849 | 0.517  | 1.431 | 3.413 | 2.217  |
| SLC25A18            | 0.288  | 1.221 | 6.631 | 0.957  |
| SLC25A19            | 0.182  | 1.134 | 4.559 | 0.510  |
| SLC25A22            | 1.054  | 2.076 | 4.421 | 3.392  |

|                                 |        |       |       |        |
|---------------------------------|--------|-------|-------|--------|
| SLC25A23                        | 0.462  | 1.378 | 7.742 | 2.084  |
| SLC25A27                        | 0.143  | 1.104 | 7.077 | 0.676  |
| SLC25A29                        | -0.692 | 0.619 | 6.243 | -2.384 |
| SLC25A3                         | 0.274  | 1.209 | 4.121 | 0.676  |
| SLC25A32                        | 0.279  | 1.213 | 5.670 | 1.181  |
| SLC25A37                        | -0.075 | 0.949 | 6.174 | -0.265 |
| SLC25A4                         | 0.407  | 1.326 | 8.151 | 1.806  |
| SLC25A40                        | 0.570  | 1.484 | 5.440 | 2.006  |
| SLC25A44                        | 0.209  | 1.156 | 6.021 | 1.001  |
| SLC25A46                        | 0.414  | 1.332 | 6.117 | 2.210  |
| SLC25A48                        | -0.756 | 0.592 | 4.020 | -1.892 |
| SLC26A4                         | 1.110  | 2.158 | 2.817 | 3.127  |
| SLC26A4-AS1                     | 1.975  | 3.931 | 3.706 | 3.310  |
| SLC26A8                         | 0.791  | 1.731 | 3.070 | 2.383  |
| SLC27A1                         | -0.480 | 0.717 | 5.719 | -2.137 |
| SLC27A2                         | 1.271  | 2.414 | 2.599 | 2.915  |
| SLC27A6                         | -0.704 | 0.614 | 3.679 | -1.779 |
| SLC29A1                         | 0.263  | 1.200 | 4.925 | 1.138  |
| SLC29A2                         | -0.325 | 0.798 | 4.606 | -1.166 |
| SLC29A3                         | -0.838 | 0.559 | 4.822 | -3.040 |
| SLC29A4                         | 0.341  | 1.267 | 4.754 | 0.826  |
| SLC2A12                         | 0.579  | 1.494 | 4.855 | 1.584  |
| SLC2A13                         | 1.245  | 2.370 | 5.826 | 2.632  |
| SLC2A3                          | 0.811  | 1.754 | 5.126 | 1.628  |
| SLC2A4RG                        | -0.506 | 0.704 | 4.357 | -2.359 |
| SLC2A5                          | -0.269 | 0.830 | 4.204 | -0.789 |
| SLC30A3                         | 1.039  | 2.055 | 3.226 | 3.117  |
| SLC30A4                         | 0.199  | 1.148 | 4.956 | 0.844  |
| SLC30A9                         | 0.350  | 1.275 | 7.228 | 1.605  |
| SLC31A1                         | 0.266  | 1.203 | 6.105 | 1.080  |
| SLC31A2                         | -1.149 | 0.451 | 6.861 | -2.782 |
| SLC32A1                         | 0.366  | 1.289 | 4.180 | 0.853  |
| SLC35A1//C6orf165//RP3-382I10.7 | 0.509  | 1.423 | 5.625 | 2.104  |
| SLC35B2//MIR4647                | -0.534 | 0.691 | 5.146 | -1.945 |
| SLC35B4                         | 0.171  | 1.126 | 6.315 | 0.904  |
| SLC35D1                         | -0.422 | 0.747 | 4.698 | -1.556 |
| SLC35D2                         | -0.859 | 0.551 | 5.449 | -2.001 |
| SLC35E2                         | 0.335  | 1.261 | 4.744 | 1.079  |
| SLC35F1                         | 1.073  | 2.104 | 7.097 | 4.020  |
| SLC35F3                         | 0.673  | 1.595 | 4.939 | 2.290  |
| SLC35G5//SLC35G4P//SLC35G6      | -0.002 | 0.999 | 2.988 | -0.005 |
| SLC36A1                         | 0.299  | 1.230 | 4.773 | 1.183  |
| SLC36A4                         | 0.429  | 1.347 | 5.465 | 1.801  |
| SLC37A2                         | -0.220 | 0.858 | 2.964 | -0.680 |
| SLC37A3                         | 0.314  | 1.244 | 5.011 | 1.324  |
| SLC38A1                         | 0.084  | 1.060 | 9.188 | 0.345  |
| SLC38A10                        | -0.317 | 0.803 | 4.834 | -1.319 |
| SLC38A11                        | 0.682  | 1.604 | 3.073 | 2.211  |
| SLC38A3                         | -0.245 | 0.844 | 6.746 | -0.780 |
| SLC38A5                         | 0.384  | 1.305 | 3.214 | 0.950  |

|                      |        |       |       |        |
|----------------------|--------|-------|-------|--------|
| SLC38A6              | 0.246  | 1.186 | 4.389 | 1.135  |
| SLC38A8              | 0.297  | 1.229 | 2.613 | 1.054  |
| SLC39A10             | 0.869  | 1.827 | 5.294 | 2.758  |
| SLC39A11             | -0.826 | 0.564 | 5.888 | -3.137 |
| SLC39A12             | 0.393  | 1.313 | 5.272 | 1.659  |
| SLC39A14             | 0.382  | 1.303 | 5.709 | 0.850  |
| SLC39A3              | 0.182  | 1.134 | 3.477 | 0.717  |
| SLC39A8              | -0.065 | 0.956 | 4.803 | -0.298 |
| SLC40A1              | -0.679 | 0.625 | 4.136 | -2.164 |
| SLC41A2              | 0.481  | 1.396 | 5.702 | 1.996  |
| SLC43A3              | -0.320 | 0.801 | 3.903 | -1.320 |
| SLC44A1              | -1.082 | 0.472 | 8.913 | -3.298 |
| SLC44A2              | -0.592 | 0.664 | 8.210 | -2.179 |
| SLC44A3              | -0.409 | 0.753 | 4.021 | -1.409 |
| SLC44A5              | 1.241  | 2.363 | 3.898 | 3.321  |
| SLC45A3              | -0.962 | 0.514 | 4.977 | -1.864 |
| SLC45A4              | 0.656  | 1.576 | 4.815 | 1.935  |
| SLC46A1              | -0.468 | 0.723 | 4.869 | -1.842 |
| SLC47A1              | 0.864  | 1.820 | 3.420 | 1.782  |
| SLC47A2              | -0.657 | 0.634 | 2.891 | -1.600 |
| SLC4A10              | 1.590  | 3.011 | 5.719 | 2.314  |
| SLC4A1AP             | 0.351  | 1.275 | 5.651 | 1.665  |
| SLC4A2               | -0.723 | 0.606 | 3.252 | -3.493 |
| SLC4A3               | 0.352  | 1.276 | 5.133 | 1.278  |
| SLC4A4               | 0.199  | 1.148 | 8.761 | 0.599  |
| SLC4A5//RP11-287D1.3 | 0.023  | 1.016 | 4.222 | 0.068  |
| SLC4A7               | 0.604  | 1.520 | 5.797 | 2.762  |
| SLC4A8               | 0.330  | 1.257 | 3.980 | 1.166  |
| SLC50A1              | -0.015 | 0.990 | 4.082 | -0.059 |
| SLC51B               | 0.033  | 1.023 | 2.767 | 0.137  |
| SLC52A2//GPR172A     | 0.175  | 1.129 | 2.702 | 0.581  |
| SLC5A11              | -1.578 | 0.335 | 6.596 | -3.198 |
| SLC5A5               | 0.564  | 1.478 | 2.209 | 1.722  |
| SLC5A6               | 0.117  | 1.085 | 3.769 | 0.493  |
| SLC5A7               | -0.863 | 0.550 | 3.494 | -0.967 |
| SLC6A1               | 0.149  | 1.109 | 8.567 | 0.570  |
| SLC6A11              | 0.195  | 1.144 | 6.164 | 0.446  |
| SLC6A13              | 0.084  | 1.060 | 3.348 | 0.257  |
| SLC6A15              | 0.975  | 1.966 | 5.218 | 1.873  |
| SLC6A17              | 1.477  | 2.783 | 6.072 | 2.920  |
| SLC6A20              | 0.588  | 1.503 | 3.103 | 1.411  |
| SLC6A5               | -1.713 | 0.305 | 3.553 | -1.697 |
| SLC6A6               | 0.245  | 1.185 | 5.695 | 0.638  |
| SLC6A7               | 1.556  | 2.941 | 3.918 | 2.662  |
| SLC6A9               | -1.356 | 0.391 | 6.319 | -3.649 |
| SLC7A10              | 0.401  | 1.320 | 4.177 | 0.894  |
| SLC7A11              | -0.018 | 0.988 | 7.824 | -0.073 |
| SLC7A14              | 0.278  | 1.212 | 6.085 | 0.804  |
| SLC7A2               | 0.626  | 1.543 | 5.847 | 1.259  |
| SLC7A3               | -0.205 | 0.868 | 1.890 | -0.687 |

|                                  |        |       |       |        |
|----------------------------------|--------|-------|-------|--------|
| SLC7A5                           | -0.031 | 0.979 | 7.849 | -0.105 |
| SLC7A6                           | 0.324  | 1.252 | 4.640 | 1.233  |
| SLC7A7                           | -0.337 | 0.792 | 2.366 | -1.227 |
| SLC7A8                           | 0.758  | 1.691 | 4.148 | 2.020  |
| SLC8A1                           | 0.791  | 1.731 | 4.831 | 2.696  |
| SLC8A2                           | 1.421  | 2.677 | 5.910 | 2.793  |
| SLC8A3                           | -0.346 | 0.787 | 3.317 | -1.298 |
| SLC8B1                           | -0.190 | 0.876 | 4.481 | -0.851 |
| SLC9A1                           | 0.383  | 1.304 | 5.313 | 1.342  |
| SLC9A2                           | 0.131  | 1.095 | 2.270 | 0.436  |
| SLC9A3R1                         | 0.242  | 1.183 | 7.578 | 0.976  |
| SLC9A5                           | 0.729  | 1.657 | 3.096 | 2.335  |
| SLC9A6                           | 0.679  | 1.601 | 8.944 | 2.273  |
| SLC9A7                           | 0.634  | 1.552 | 5.616 | 1.505  |
| SLC9A7                           | 0.379  | 1.300 | 6.525 | 1.154  |
| SLC9A7P1                         | 0.595  | 1.511 | 4.563 | 1.541  |
| SLC9A9                           | -0.631 | 0.646 | 7.077 | -2.023 |
| SLC9B2                           | 0.510  | 1.424 | 6.169 | 1.803  |
| SLCO1A2                          | -0.722 | 0.606 | 6.031 | -2.166 |
| SLCO1C1                          | 1.076  | 2.108 | 5.629 | 3.169  |
| SLCO2A1                          | 0.180  | 1.133 | 3.726 | 0.620  |
| SLCO2B1                          | -0.402 | 0.757 | 5.378 | -1.373 |
| SLCO3A1                          | -0.724 | 0.605 | 6.280 | -2.889 |
| SLCO4A1                          | 0.312  | 1.241 | 4.266 | 0.908  |
| SLCO4C1                          | 1.596  | 3.023 | 2.560 | 3.788  |
| SLED1//RP11-701P16.1             | -0.466 | 0.724 | 2.882 | -1.158 |
| SLFN11                           | -0.447 | 0.734 | 4.128 | -1.933 |
| SLFN12                           | -0.281 | 0.823 | 2.327 | -1.121 |
| SLFN5                            | 0.020  | 1.014 | 6.107 | 0.061  |
| SLIT1//ARHGAP19-SLIT1//ARHGAP19  | 0.990  | 1.986 | 5.338 | 2.992  |
| SLIT2                            | 0.687  | 1.610 | 5.477 | 1.503  |
| SLIT2-IT1                        | 0.133  | 1.097 | 3.195 | 0.364  |
| SLIT3                            | 0.484  | 1.399 | 5.332 | 1.305  |
| SLITRK1                          | 0.164  | 1.120 | 6.369 | 0.561  |
| SLITRK3                          | 0.845  | 1.796 | 5.324 | 2.106  |
| SLITRK4                          | 1.245  | 2.370 | 3.440 | 2.436  |
| SLITRK5                          | 0.724  | 1.652 | 5.441 | 2.451  |
| SLITRK5                          | 0.595  | 1.511 | 4.917 | 1.769  |
| SLN                              | 1.394  | 2.627 | 2.555 | 3.825  |
| SLPI                             | 0.516  | 1.430 | 4.156 | 0.628  |
| SLU7                             | 0.391  | 1.311 | 5.759 | 2.023  |
| SMA5//SMA4//GUSBP3//LOC653080//C | -0.611 | 0.655 | 7.674 | -2.151 |
| SMAD5                            | -0.903 | 0.535 | 2.142 | -2.177 |
| SMAD9                            | -0.788 | 0.579 | 6.802 | -2.563 |
| SMAGP                            | 0.073  | 1.052 | 3.317 | 0.223  |
| SMAP1                            | 0.617  | 1.534 | 6.489 | 3.337  |
| SMG1P7//RP11-296I10.6            | -0.274 | 0.827 | 3.699 | -1.008 |
| SMIM10                           | -0.532 | 0.692 | 4.836 | -2.255 |
| SMIM13                           | 0.143  | 1.104 | 7.121 | 0.674  |
| SMIM17                           | 0.837  | 1.786 | 5.133 | 1.620  |



|                                    |        |       |       |        |
|------------------------------------|--------|-------|-------|--------|
| SMIM18                             | 0.221  | 1.165 | 2.197 | 0.664  |
| SMIM24//C19orf77                   | 0.757  | 1.690 | 2.713 | 2.022  |
| SMIM3                              | -0.150 | 0.901 | 4.238 | -0.531 |
| SMIM5                              | -1.012 | 0.496 | 2.759 | -2.525 |
| SMIM6                              | -0.787 | 0.580 | 3.576 | -1.955 |
| SMIM8                              | 0.223  | 1.167 | 4.716 | 0.991  |
| SMKR1                              | 0.452  | 1.368 | 3.394 | 1.355  |
| SMO                                | -0.294 | 0.816 | 4.679 | -1.276 |
| SMOC1                              | -1.043 | 0.485 | 5.590 | -2.950 |
| SMOX                               | -0.572 | 0.672 | 6.355 | -2.091 |
| SMPD3                              | 0.565  | 1.480 | 3.520 | 1.960  |
| SMYD2                              | 0.988  | 1.984 | 6.382 | 2.854  |
| SMYD3                              | 0.381  | 1.303 | 4.517 | 1.699  |
| SMYD3-IT1                          | 0.057  | 1.040 | 4.781 | 0.223  |
| SNAI1                              | 0.334  | 1.260 | 2.995 | 1.262  |
| SNAI2                              | 0.368  | 1.290 | 4.470 | 1.107  |
| SNAI3-AS1                          | 0.429  | 1.346 | 4.496 | 1.540  |
| SNAP23                             | -0.527 | 0.694 | 7.427 | -2.172 |
| SNAP25                             | 1.032  | 2.045 | 9.944 | 1.697  |
| SNAP25-AS1                         | 0.703  | 1.628 | 2.241 | 2.883  |
| SNAP47//LOC100130093               | 0.470  | 1.385 | 3.870 | 2.315  |
| SNAP91                             | 0.946  | 1.927 | 7.349 | 2.227  |
| SNAR-B2//SNAR-B1                   | -0.230 | 0.853 | 5.001 | -0.571 |
| SNAR-C2//SNAR-C4//SNAR-C5//SNAR-C: | -0.254 | 0.838 | 4.502 | -0.586 |
| SNAR-C2//SNAR-C4//SNAR-C5//SNAR-C: | -0.413 | 0.751 | 5.329 | -0.731 |
| SNAR-C2//SNAR-C5//SNAR-C1          | -0.315 | 0.804 | 4.369 | -0.805 |
| SNAR-D                             | -0.033 | 0.977 | 3.357 | -0.094 |
| SNAR-F                             | -1.173 | 0.444 | 3.089 | -1.930 |
| SNAR-G1                            | -0.105 | 0.930 | 4.176 | -0.460 |
| SNAR-G2                            | -0.311 | 0.806 | 2.860 | -1.266 |
| SNAR-H                             | -0.331 | 0.795 | 1.894 | -0.728 |
| SNCA                               | 0.636  | 1.554 | 6.617 | 3.191  |
| SNCAIP                             | 0.373  | 1.295 | 3.531 | 1.396  |
| SNCB                               | 1.294  | 2.452 | 6.651 | 2.341  |
| SNCG                               | 0.271  | 1.207 | 6.206 | 0.629  |
| SNED1                              | -0.252 | 0.840 | 4.619 | -0.827 |
| SNHG10//SCARNA13                   | -0.098 | 0.935 | 4.483 | -0.411 |
| SNHG12//SNORA44//SNORA61//SNORA    | -0.163 | 0.893 | 4.482 | -0.496 |
| SNHG15//SNORA9//LOC101928927       | -0.345 | 0.787 | 3.958 | -1.332 |
| SNHG18//CTD-2001E22.2              | -0.806 | 0.572 | 3.227 | -2.177 |
| SNHG24//RP11-909M7.3               | 0.307  | 1.237 | 5.274 | 0.596  |
| SNHG7//SNORA17//SNORA43            | -0.052 | 0.964 | 4.527 | -0.241 |
| SNN                                | 0.697  | 1.621 | 8.153 | 2.566  |
| SNORA10//RPS2//SNORA64             | -0.332 | 0.795 | 6.654 | -1.043 |
| SNORA11//MAGED2                    | 0.032  | 1.023 | 9.550 | 0.102  |
| SNORA11B                           | -0.590 | 0.664 | 3.791 | -1.769 |
| SNORA13                            | 0.127  | 1.092 | 5.429 | 0.288  |
| SNORA14A                           | -0.412 | 0.752 | 5.874 | -1.044 |
| SNORA14B                           | -0.013 | 0.991 | 6.899 | -0.040 |
| SNORA15                            | -0.054 | 0.963 | 3.963 | -0.230 |

|                                  |        |       |        |        |
|----------------------------------|--------|-------|--------|--------|
| SNORA16B                         | -0.578 | 0.670 | 3.752  | -1.716 |
| SNORA21//RPL23                   | 0.136  | 1.099 | 6.775  | 0.678  |
| SNORA22                          | -0.167 | 0.891 | 8.990  | -0.670 |
| SNORA23                          | -0.177 | 0.885 | 8.947  | -0.610 |
| SNORA24//SNHG8                   | 0.026  | 1.018 | 5.642  | 0.097  |
| SNORA26                          | -0.280 | 0.824 | 4.420  | -1.096 |
| SNORA28                          | -0.208 | 0.866 | 3.892  | -0.710 |
| SNORA2A                          | 0.431  | 1.348 | 2.472  | 0.931  |
| SNORA31                          | -0.302 | 0.811 | 2.244  | -0.981 |
| SNORA33                          | -0.390 | 0.763 | 8.874  | -1.013 |
| SNORA34//MIR1291                 | -0.203 | 0.869 | 9.183  | -1.039 |
| SNORA35                          | 0.128  | 1.093 | 4.515  | 0.256  |
| SNORA36B//MIR664A                | -0.085 | 0.942 | 3.298  | -0.263 |
| SNORA36C                         | -0.205 | 0.868 | 2.412  | -0.618 |
| SNORA37                          | -0.540 | 0.688 | 8.356  | -2.077 |
| SNORA38                          | -0.476 | 0.719 | 4.638  | -1.407 |
| SNORA38                          | -0.465 | 0.725 | 3.216  | -0.992 |
| SNORA38B                         | -0.137 | 0.910 | 9.049  | -0.269 |
| SNORA45B                         | -0.681 | 0.624 | 8.224  | -1.791 |
| SNORA46                          | -0.186 | 0.879 | 7.665  | -0.482 |
| SNORA47                          | -0.599 | 0.660 | 10.675 | -3.020 |
| SNORA48//EIF4A1//SNORA67//SNORD1 | -0.241 | 0.846 | 11.099 | -1.347 |
| SNORA54                          | -0.834 | 0.561 | 9.137  | -2.314 |
| SNORA55                          | -0.232 | 0.851 | 4.927  | -0.946 |
| SNORA57//METTL12                 | -0.039 | 0.973 | 9.140  | -0.166 |
| SNORA59B//SNORA59A               | 0.231  | 1.173 | 6.744  | 1.155  |
| SNORA5A//TBRG4                   | -0.501 | 0.707 | 5.507  | -1.753 |
| SNORA5C//TBRG4                   | -0.776 | 0.584 | 4.158  | -2.800 |
| SNORA60                          | -0.551 | 0.683 | 8.740  | -1.698 |
| SNORA64//RPS2                    | -0.391 | 0.763 | 6.986  | -1.643 |
| SNORA65                          | 0.119  | 1.086 | 7.104  | 0.616  |
| SNORA66//RPL5                    | -0.191 | 0.876 | 3.442  | -0.680 |
| SNORA68//RPL18A                  | -0.184 | 0.880 | 9.855  | -0.950 |
| SNORA70B                         | -0.419 | 0.748 | 2.900  | -1.275 |
| SNORA70D                         | -0.201 | 0.870 | 2.815  | -0.719 |
| SNORA70E                         | -0.335 | 0.793 | 3.284  | -0.699 |
| SNORA70G                         | 0.109  | 1.079 | 3.750  | 0.338  |
| SNORA71A                         | -0.352 | 0.784 | 5.564  | -1.659 |
| SNORA71B//SNHG17                 | -0.031 | 0.979 | 8.138  | -0.106 |
| SNORA71C                         | -0.531 | 0.692 | 5.699  | -2.276 |
| SNORA71D                         | -0.022 | 0.985 | 6.503  | -0.080 |
| SNORA72//RPL30                   | 0.072  | 1.051 | 7.426  | 0.186  |
| SNORA74A                         | -0.021 | 0.985 | 3.397  | -0.079 |
| SNORA74B                         | -0.470 | 0.722 | 6.468  | -0.988 |
| SNORA75                          | -0.677 | 0.626 | 9.566  | -1.374 |
| SNORA76A                         | -0.316 | 0.804 | 8.677  | -1.437 |
| SNORA76C//RP11-329L6.1           | -0.591 | 0.664 | 6.309  | -1.751 |
| SNORA77                          | -0.126 | 0.917 | 4.105  | -0.537 |
| SNORA79                          | -0.505 | 0.705 | 2.971  | -1.667 |
| SNORA7B                          | -0.489 | 0.712 | 7.154  | -1.695 |

|                                  |        |       |        |        |
|----------------------------------|--------|-------|--------|--------|
| SNORA80A                         | 0.129  | 1.094 | 6.314  | 0.492  |
| SNORA80B                         | -0.017 | 0.988 | 3.895  | -0.057 |
| SNORA80E                         | -0.401 | 0.757 | 6.747  | -1.155 |
| SNORA84//MIR3651                 | -0.026 | 0.982 | 5.361  | -0.133 |
| SNORA9//SNHG15//LOC101928927     | 0.070  | 1.050 | 6.048  | 0.347  |
| SNORD10//EIF4A1//SNORA67//SNORA4 | -0.348 | 0.786 | 8.373  | -1.585 |
| SNORD100//SNORA33                | -0.811 | 0.570 | 9.728  | -2.127 |
| SNORD103A//SNORD103B             | -0.015 | 0.990 | 3.366  | -0.056 |
| SNORD104                         | -0.454 | 0.730 | 6.621  | -1.518 |
| SNORD109B//SNORD109A//RP11-701H: | 0.663  | 1.584 | 6.434  | 1.643  |
| SNORD111                         | -0.291 | 0.817 | 5.441  | -1.110 |
| SNORD113-1                       | 0.849  | 1.801 | 4.211  | 1.359  |
| SNORD113-3                       | 0.864  | 1.820 | 3.753  | 1.854  |
| SNORD113-4//SNHG23//AL132709.5   | 0.515  | 1.429 | 5.577  | 1.204  |
| SNORD113-5                       | 0.743  | 1.674 | 2.194  | 2.264  |
| SNORD113-8                       | 1.089  | 2.128 | 3.510  | 1.873  |
| SNORD113-9                       | 0.754  | 1.686 | 3.897  | 1.768  |
| SNORD114-1                       | 0.563  | 1.477 | 8.583  | 1.060  |
| SNORD114-10                      | 0.738  | 1.668 | 1.814  | 1.692  |
| SNORD114-11                      | 1.097  | 2.139 | 3.108  | 1.990  |
| SNORD114-12                      | 0.739  | 1.669 | 9.262  | 1.790  |
| SNORD114-13                      | 1.004  | 2.005 | 3.010  | 1.889  |
| SNORD114-14                      | 0.428  | 1.345 | 5.376  | 1.073  |
| SNORD114-15                      | 0.781  | 1.718 | 4.988  | 1.638  |
| SNORD114-16                      | 0.960  | 1.945 | 3.702  | 1.636  |
| SNORD114-17                      | 0.846  | 1.798 | 3.997  | 1.624  |
| SNORD114-2                       | 0.960  | 1.946 | 3.395  | 1.656  |
| SNORD114-20                      | -0.259 | 0.836 | 3.131  | -0.326 |
| SNORD114-21                      | 0.794  | 1.733 | 5.691  | 1.588  |
| SNORD114-22                      | 0.994  | 1.991 | 4.686  | 1.928  |
| SNORD114-23                      | 0.967  | 1.955 | 2.337  | 1.956  |
| SNORD114-25                      | 1.231  | 2.347 | 4.152  | 1.678  |
| SNORD114-26//SNHG24//RP11-909M7. | 1.059  | 2.083 | 4.605  | 1.843  |
| SNORD114-27                      | 0.157  | 1.115 | 4.492  | 0.561  |
| SNORD114-28                      | 1.115  | 2.165 | 6.652  | 1.856  |
| SNORD114-3                       | 0.731  | 1.659 | 8.943  | 1.603  |
| SNORD114-30                      | -0.106 | 0.929 | 3.039  | -0.214 |
| SNORD114-31                      | 0.474  | 1.389 | 2.942  | 0.896  |
| SNORD114-4                       | 0.843  | 1.794 | 1.991  | 2.162  |
| SNORD114-6                       | 0.632  | 1.550 | 2.335  | 1.047  |
| SNORD114-7                       | 0.003  | 1.002 | 2.711  | 0.005  |
| SNORD114-9                       | 0.945  | 1.925 | 4.802  | 1.486  |
| SNORD115-1//SNORD115-13//SNORD11 | 0.518  | 1.432 | 10.603 | 1.732  |
| SNORD115-10//SNORD115-21         | 0.954  | 1.937 | 5.423  | 1.800  |
| SNORD115-15//SNORD115-21         | 0.528  | 1.442 | 3.764  | 1.326  |
| SNORD115-17//SNORD115-18//SNORD1 | 0.660  | 1.580 | 9.964  | 1.747  |
| SNORD115-20//IPW//SNORD107//PWA  | 0.508  | 1.422 | 10.523 | 1.443  |
| SNORD115-21                      | 0.479  | 1.394 | 2.392  | 1.345  |
| SNORD115-25                      | 0.459  | 1.375 | 7.977  | 1.087  |
| SNORD115-27                      | 0.547  | 1.461 | 7.359  | 1.226  |

|                                     |        |       |        |        |
|-------------------------------------|--------|-------|--------|--------|
| SNORD115-3                          | 1.326  | 2.508 | 2.935  | 2.446  |
| SNORD115-30                         | 0.804  | 1.746 | 7.912  | 1.355  |
| SNORD115-31                         | 0.652  | 1.572 | 6.843  | 1.411  |
| SNORD115-32                         | 1.199  | 2.296 | 4.979  | 2.243  |
| SNORD115-38                         | 1.140  | 2.203 | 4.928  | 2.023  |
| SNORD115-4//SNORD115-6//SNORD115    | 0.525  | 1.438 | 11.172 | 1.687  |
| SNORD115-40                         | 0.841  | 1.791 | 4.167  | 1.911  |
| SNORD115-41                         | 0.605  | 1.521 | 2.298  | 1.584  |
| SNORD115-44//SNORD115-1//SNORD115   | 0.666  | 1.586 | 10.604 | 1.850  |
| SNORD115-45                         | 0.534  | 1.448 | 3.669  | 0.941  |
| SNORD115-5//SNORD115-9//SNORD115    | 0.544  | 1.458 | 11.040 | 1.730  |
| SNORD115-5//SNORD115-9//SNORD115    | 0.527  | 1.441 | 11.025 | 1.652  |
| SNORD115-5//SNORD115-9//SNORD115    | 0.485  | 1.400 | 10.981 | 1.658  |
| SNORD115-8                          | 1.177  | 2.260 | 2.541  | 2.941  |
| SNORD116-1                          | 0.199  | 1.148 | 7.871  | 0.694  |
| SNORD116-14//SNRPN                  | 0.194  | 1.144 | 9.539  | 0.771  |
| SNORD116-16                         | 0.719  | 1.646 | 2.215  | 2.233  |
| SNORD116-20//SNORD116-19//SNORD116  | -0.041 | 0.972 | 7.432  | -0.163 |
| SNORD116-21//SNORD116-19//SNORD116  | 0.929  | 1.904 | 6.446  | 1.323  |
| SNORD116-23                         | 0.348  | 1.273 | 5.106  | 1.111  |
| SNORD116-25                         | 0.621  | 1.537 | 4.066  | 1.684  |
| SNORD116-26                         | 0.470  | 1.385 | 6.203  | 1.368  |
| SNORD116-27                         | 0.786  | 1.724 | 5.203  | 2.095  |
| SNORD116-29                         | 0.369  | 1.292 | 6.987  | 1.082  |
| SNORD116-30                         | 0.663  | 1.583 | 6.211  | 1.801  |
| SNORD117                            | -0.449 | 0.733 | 8.189  | -2.431 |
| SNORD117                            | -0.416 | 0.750 | 8.351  | -2.260 |
| SNORD12                             | -0.165 | 0.892 | 6.133  | -0.690 |
| SNORD123                            | -0.734 | 0.601 | 4.488  | -1.650 |
| SNORD124                            | -0.591 | 0.664 | 2.396  | -2.078 |
| SNORD125//MIR3653                   | -0.335 | 0.793 | 3.250  | -0.917 |
| SNORD126                            | 0.104  | 1.075 | 2.976  | 0.355  |
| SNORD12B                            | -0.105 | 0.930 | 5.062  | -0.416 |
| SNORD12C                            | -0.410 | 0.752 | 4.299  | -1.617 |
| SNORD13P2                           | -0.503 | 0.705 | 5.201  | -1.459 |
| SNORD13P3                           | 0.202  | 1.150 | 7.005  | 0.770  |
| SNORD14A                            | -0.424 | 0.746 | 4.475  | -1.264 |
| SNORD14E                            | -0.131 | 0.913 | 5.153  | -0.347 |
| SNORD15B                            | -0.295 | 0.815 | 9.129  | -1.466 |
| SNORD17                             | -0.619 | 0.651 | 7.683  | -2.083 |
| SNORD18A//RPL4//SNORD16//SNORD115   | -0.006 | 0.996 | 2.779  | -0.017 |
| SNORD18C//RPL4//SNORD16//SNORD115   | 0.237  | 1.178 | 4.214  | 0.596  |
| SNORD2//EIF4A2//SNORA63//SNORA4//   | -0.128 | 0.915 | 5.976  | -0.524 |
| SNORD20                             | -0.278 | 0.825 | 1.890  | -1.029 |
| SNORD23//GLTSCR2                    | 0.831  | 1.779 | 2.765  | 2.186  |
| SNORD29//SNORD31//SNORD30//SNORD115 | 0.138  | 1.101 | 3.856  | 0.536  |
| SNORD35B//RPS11                     | -0.430 | 0.742 | 4.860  | -1.897 |
| SNORD37                             | -0.064 | 0.956 | 4.016  | -0.198 |
| SNORD3C                             | -0.477 | 0.718 | 8.050  | -1.607 |
| SNORD3D//RP11-160E2.6               | 0.041  | 1.029 | 5.839  | 0.184  |

|                                  |        |       |        |        |
|----------------------------------|--------|-------|--------|--------|
| SNORD42A//RPL23A                 | -0.425 | 0.745 | 9.067  | -2.360 |
| SNORD4B//RPL23A//SNORD42A        | -0.479 | 0.718 | 5.548  | -2.252 |
| SNORD51                          | -0.108 | 0.928 | 4.977  | -0.375 |
| SNORD56B                         | 0.130  | 1.094 | 2.296  | 0.332  |
| SNORD58A//RPL17//SNORD58B//SNORI | -0.320 | 0.801 | 4.603  | -1.337 |
| SNORD58C//RPL17//SNORD58B//SNORI | -0.035 | 0.976 | 5.924  | -0.140 |
| SNORD59B                         | 0.226  | 1.170 | 3.780  | 0.814  |
| SNORD60                          | -0.410 | 0.753 | 6.697  | -1.961 |
| SNORD61//RBMX//LOC101928747      | -0.383 | 0.767 | 8.668  | -1.709 |
| SNORD62A//SNORD62B               | 0.116  | 1.084 | 5.802  | 0.341  |
| SNORD66                          | -0.443 | 0.735 | 6.034  | -1.431 |
| SNORD67                          | -0.090 | 0.939 | 5.078  | -0.369 |
| SNORD7                           | -0.492 | 0.711 | 2.711  | -1.765 |
| SNORD70                          | 0.069  | 1.049 | 2.939  | 0.283  |
| SNORD71                          | 0.166  | 1.122 | 11.202 | 0.638  |
| SNORD75                          | -0.146 | 0.904 | 2.644  | -0.395 |
| SNORD82                          | -0.224 | 0.856 | 8.829  | -0.901 |
| SNORD83A                         | 0.364  | 1.287 | 2.617  | 1.110  |
| SNORD85                          | -0.082 | 0.945 | 2.383  | -0.275 |
| SNORD88A                         | -0.436 | 0.739 | 4.974  | -1.391 |
| SNORD88B//C19orf48//SNORD88C     | -0.126 | 0.916 | 3.784  | -0.446 |
| SNORD88C//C19orf48               | -0.168 | 0.890 | 2.598  | -0.668 |
| SNORD9                           | -0.037 | 0.974 | 8.082  | -0.170 |
| SNORD90                          | -0.317 | 0.803 | 6.119  | -1.276 |
| SNORD91A                         | 0.432  | 1.349 | 3.477  | 1.300  |
| SNORD91B                         | -0.516 | 0.700 | 7.377  | -2.234 |
| SNORD92                          | 0.065  | 1.046 | 4.766  | 0.234  |
| SNORD94                          | -0.544 | 0.686 | 8.106  | -2.523 |
| SNORD96B                         | 0.415  | 1.333 | 2.527  | 1.373  |
| SNORD99                          | -0.559 | 0.679 | 2.048  | -1.784 |
| SNPH                             | 0.911  | 1.881 | 5.991  | 1.873  |
| SNRPN//IPW//SNORD107//PWARSN//SI | 0.484  | 1.399 | 4.959  | 1.258  |
| SNRPN//SNURF                     | 0.261  | 1.198 | 9.522  | 1.000  |
| SNTA1                            | -0.263 | 0.833 | 6.186  | -0.963 |
| SNTB2                            | 0.470  | 1.385 | 6.383  | 1.648  |
| SNTG1                            | 1.014  | 2.019 | 5.512  | 2.544  |
| SNURF//IPW//SNORD107//PWARSN//SI | 0.577  | 1.492 | 6.420  | 1.613  |
| SNX1                             | -0.573 | 0.672 | 6.133  | -2.421 |
| SNX10                            | 0.830  | 1.778 | 4.741  | 2.063  |
| SNX16                            | 0.164  | 1.120 | 3.951  | 0.673  |
| SNX18                            | -0.535 | 0.690 | 4.592  | -1.949 |
| SNX20                            | -0.289 | 0.818 | 2.445  | -0.890 |
| SNX22                            | -0.505 | 0.705 | 4.300  | -1.571 |
| SNX29//LOC101929304//AC007601.2  | -0.700 | 0.615 | 7.125  | -2.394 |
| SNX32                            | 1.063  | 2.089 | 3.233  | 2.557  |
| SNX33                            | -0.120 | 0.920 | 5.028  | -0.586 |
| SNX4                             | 0.075  | 1.053 | 6.512  | 0.259  |
| SOAT1                            | 0.024  | 1.017 | 6.124  | 0.097  |
| SOBP                             | 0.208  | 1.155 | 6.509  | 1.022  |
| SOCS3                            | 1.317  | 2.492 | 6.432  | 2.513  |

|                                       |        |       |       |        |
|---------------------------------------|--------|-------|-------|--------|
| SOCS6                                 | -0.467 | 0.723 | 5.546 | -1.882 |
| SOCS7                                 | 0.327  | 1.254 | 6.300 | 1.443  |
| SOD2//LOC100129518                    | 0.252  | 1.191 | 4.162 | 0.803  |
| SOD3                                  | 0.574  | 1.488 | 4.245 | 2.016  |
| SOGA3//KIAA0408//RP3-403A15.5         | 0.396  | 1.316 | 6.121 | 1.579  |
| SOHLH1                                | 0.669  | 1.590 | 2.652 | 2.298  |
| SORBS2                                | 0.749  | 1.681 | 5.287 | 2.000  |
| SORCS1                                | 1.183  | 2.271 | 5.011 | 2.772  |
| SORCS3                                | 0.491  | 1.405 | 5.364 | 1.891  |
| SOS1-IT1                              | -0.439 | 0.738 | 2.866 | -1.143 |
| SOSTDC1                               | 1.185  | 2.274 | 2.884 | 3.014  |
| SOWAHA                                | 0.346  | 1.271 | 4.705 | 0.946  |
| SOWAHB                                | 1.277  | 2.423 | 3.499 | 2.998  |
| SOWAHC                                | -0.371 | 0.774 | 2.912 | -1.414 |
| SOX1                                  | 0.567  | 1.481 | 2.886 | 1.830  |
| SOX10                                 | -1.363 | 0.389 | 5.406 | -4.319 |
| SOX13                                 | -0.350 | 0.784 | 4.343 | -1.596 |
| SOX18                                 | -0.117 | 0.922 | 2.563 | -0.357 |
| SOX2-OT                               | -0.685 | 0.622 | 3.948 | -2.574 |
| SOX5                                  | 0.536  | 1.449 | 5.125 | 2.295  |
| SOX8                                  | -1.018 | 0.494 | 5.787 | -3.141 |
| SOX9                                  | 0.033  | 1.023 | 8.204 | 0.147  |
| SOX9-AS1//AC005152.2                  | -0.365 | 0.776 | 2.813 | -1.274 |
| SP1                                   | -0.398 | 0.759 | 6.846 | -1.929 |
| SP100                                 | -0.068 | 0.954 | 4.771 | -0.259 |
| SP110                                 | -0.287 | 0.819 | 5.076 | -0.902 |
| SP9                                   | 0.025  | 1.018 | 3.419 | 0.085  |
| SPAG17                                | -0.305 | 0.809 | 1.964 | -0.727 |
| SPAG5                                 | 0.486  | 1.401 | 3.344 | 1.571  |
| SPAG6                                 | -0.259 | 0.836 | 2.477 | -0.690 |
| SPAG8                                 | -0.158 | 0.896 | 2.797 | -0.522 |
| SPARC                                 | -1.033 | 0.489 | 6.921 | -3.246 |
| SPATA13//RP11-307N16.6                | -0.782 | 0.582 | 6.134 | -2.543 |
| SPATA13//RP11-309I15.1//RP11-307N16.6 | -0.758 | 0.591 | 3.558 | -2.748 |
| SPATA17                               | 0.184  | 1.136 | 2.231 | 0.600  |
| SPATA18                               | 0.240  | 1.181 | 3.542 | 0.545  |
| SPATA2L                               | 0.063  | 1.044 | 3.011 | 0.244  |
| SPATA31C1                             | 0.088  | 1.063 | 2.420 | 0.307  |
| SPATA41                               | -0.208 | 0.866 | 2.146 | -0.743 |
| SPATA6                                | -0.504 | 0.705 | 4.941 | -1.663 |
| SPATA6                                | -0.292 | 0.817 | 3.967 | -0.902 |
| SPATA6L                               | 0.096  | 1.069 | 3.528 | 0.320  |
| SPATA7                                | 0.308  | 1.238 | 4.741 | 1.510  |
| SPATS2                                | 0.676  | 1.598 | 4.069 | 2.512  |
| SPDYA                                 | 0.103  | 1.074 | 4.125 | 0.305  |
| SPDYE6//SPDYE2B//SPDYE2               | -0.318 | 0.802 | 2.730 | -0.982 |
| SPEG//LOC100996693                    | 0.147  | 1.107 | 3.670 | 0.558  |
| SPHKAP                                | 1.125  | 2.182 | 4.769 | 2.128  |
| SPI1                                  | -0.418 | 0.748 | 5.303 | -1.531 |
| SPIN1                                 | 0.275  | 1.210 | 8.535 | 1.540  |

|                          |        |       |        |        |
|--------------------------|--------|-------|--------|--------|
| SPIN3                    | 0.309  | 1.239 | 4.403  | 1.198  |
| SPINT1                   | -0.524 | 0.695 | 2.514  | -2.106 |
| SPINT2                   | 0.727  | 1.655 | 5.793  | 2.413  |
| SPIRE2                   | 0.564  | 1.478 | 4.072  | 1.420  |
| SPN//LOC101929889        | -0.963 | 0.513 | 3.356  | -2.400 |
| SPOCD1                   | -0.199 | 0.871 | 2.243  | -0.801 |
| SPOCK1                   | 0.064  | 1.045 | 6.833  | 0.286  |
| SPOCK2                   | 0.411  | 1.330 | 6.969  | 1.431  |
| SPOCK3                   | -0.659 | 0.634 | 6.363  | -2.615 |
| SPON1                    | -0.466 | 0.724 | 6.611  | -1.471 |
| SPP1                     | -0.487 | 0.714 | 10.916 | -1.265 |
| SPPL2C//IMP5             | -0.302 | 0.811 | 2.967  | -1.125 |
| SPR                      | -0.002 | 0.999 | 4.710  | -0.005 |
| SPRED2                   | 0.229  | 1.172 | 4.477  | 0.934  |
| SPRN                     | 1.116  | 2.167 | 3.922  | 2.342  |
| SPRR2F                   | 0.068  | 1.048 | 2.107  | 0.241  |
| SPRY1                    | 0.409  | 1.328 | 4.472  | 1.292  |
| SPRY3                    | 0.264  | 1.201 | 4.137  | 0.783  |
| SPRY3                    | 0.066  | 1.047 | 4.649  | 0.248  |
| SPRYD3                   | 0.601  | 1.516 | 6.741  | 2.385  |
| SPRYD7                   | 0.243  | 1.183 | 5.691  | 1.169  |
| SPTB                     | 0.378  | 1.299 | 4.636  | 1.029  |
| SPTBN2                   | 1.014  | 2.020 | 5.175  | 2.434  |
| SPTBN4                   | 0.655  | 1.575 | 5.042  | 2.026  |
| SPTLC2                   | -0.651 | 0.637 | 6.869  | -2.169 |
| SPTLC3                   | 0.065  | 1.046 | 4.957  | 0.160  |
| SPTSSA                   | -0.015 | 0.990 | 5.713  | -0.063 |
| SPTSSB                   | 1.430  | 2.694 | 3.539  | 2.834  |
| SPX//C12orf39            | 0.203  | 1.151 | 3.257  | 0.585  |
| SQL                      | -0.484 | 0.715 | 6.750  | -1.409 |
| SQRDL//RP11-96O20.4      | -0.080 | 0.946 | 4.602  | -0.204 |
| SQSTM1                   | -0.155 | 0.898 | 8.059  | -0.647 |
| SRD5A1                   | 0.161  | 1.118 | 2.488  | 0.486  |
| SREBF1                   | -0.666 | 0.630 | 4.993  | -2.379 |
| SRGAP1                   | -0.350 | 0.785 | 6.219  | -1.319 |
| SRGAP2                   | -0.575 | 0.671 | 7.319  | -2.809 |
| SRGAP2//SRGAP2B//SRGAP2C | -0.840 | 0.559 | 7.162  | -2.652 |
| SRGN                     | 0.031  | 1.021 | 9.004  | 0.079  |
| SRL                      | -0.584 | 0.667 | 2.178  | -2.020 |
| SRP14-AS1                | -0.640 | 0.642 | 3.549  | -2.398 |
| SRP68                    | 0.199  | 1.148 | 7.240  | 0.980  |
| SRPK1                    | 0.455  | 1.371 | 5.338  | 1.850  |
| SRPK2                    | -0.007 | 0.995 | 7.507  | -0.038 |
| SRPX                     | -0.963 | 0.513 | 5.748  | -2.396 |
| SRPX2                    | -0.029 | 0.980 | 3.602  | -0.135 |
| SRRM3                    | 0.696  | 1.620 | 4.271  | 2.238  |
| SRRM4                    | 1.526  | 2.881 | 4.606  | 2.958  |
| SRSF12                   | 0.460  | 1.376 | 3.412  | 1.897  |
| SS18L2                   | 0.021  | 1.014 | 4.998  | 0.083  |
| SSBP3                    | 0.317  | 1.246 | 4.663  | 1.559  |

|             |        |       |       |        |
|-------------|--------|-------|-------|--------|
| SSBP4       | 0.628  | 1.546 | 5.124 | 1.846  |
| SSC5D       | -0.041 | 0.972 | 2.849 | -0.160 |
| SSFA2       | -0.397 | 0.759 | 7.046 | -1.901 |
| SSH3        | -0.383 | 0.767 | 4.907 | -1.732 |
| SSSCA1      | 0.227  | 1.170 | 5.658 | 0.968  |
| SSSCA1-AS1  | -0.132 | 0.913 | 3.997 | -0.466 |
| SST         | 0.230  | 1.173 | 6.793 | 0.344  |
| SSTR1       | 0.735  | 1.665 | 3.554 | 1.835  |
| SSTR2       | 1.141  | 2.205 | 4.880 | 2.484  |
| SSTR3       | 0.542  | 1.456 | 2.144 | 1.637  |
| SSTR4       | 0.701  | 1.626 | 2.209 | 2.108  |
| SSX2IP      | 1.121  | 2.176 | 4.340 | 2.822  |
| ST18        | -1.280 | 0.412 | 6.029 | -2.554 |
| ST3GAL1     | 0.464  | 1.380 | 4.249 | 1.952  |
| ST3GAL2     | 0.194  | 1.144 | 3.882 | 0.780  |
| ST3GAL6-AS1 | -0.400 | 0.758 | 2.784 | -1.352 |
| ST6GAL1     | -0.479 | 0.717 | 4.273 | -1.869 |
| ST6GAL2     | 0.605  | 1.521 | 3.535 | 1.948  |
| ST6GALNAC2  | -0.452 | 0.731 | 4.757 | -1.136 |
| ST6GALNAC3  | -0.563 | 0.677 | 5.932 | -2.057 |
| ST6GALNAC5  | 1.732  | 3.321 | 3.629 | 2.859  |
| ST6GALNAC6  | 0.397  | 1.317 | 6.853 | 1.777  |
| ST8SIA3     | 1.260  | 2.395 | 6.004 | 2.084  |
| ST8SIA4     | -0.057 | 0.961 | 4.788 | -0.199 |
| ST8SIA5     | 1.060  | 2.085 | 5.802 | 2.307  |
| ST8SIA6     | -0.197 | 0.873 | 3.296 | -0.630 |
| STAB1       | -0.137 | 0.909 | 5.072 | -0.303 |
| STAC2       | 1.347  | 2.545 | 4.510 | 3.067  |
| STAG3       | -0.578 | 0.670 | 3.025 | -2.172 |
| STAMBPL1    | 0.599  | 1.514 | 5.261 | 2.260  |
| STAR        | 0.910  | 1.879 | 3.109 | 3.019  |
| STARD10     | 0.157  | 1.115 | 4.456 | 0.722  |
| STARD13     | -0.100 | 0.933 | 3.921 | -0.412 |
| STARD3      | -0.514 | 0.700 | 6.052 | -2.187 |
| STARD4      | 0.423  | 1.340 | 5.982 | 1.445  |
| STARD8      | 0.326  | 1.254 | 3.494 | 1.203  |
| STARD9      | -0.424 | 0.745 | 5.500 | -1.561 |
| STAT1       | 0.433  | 1.350 | 7.361 | 1.663  |
| STAT2       | -0.595 | 0.662 | 6.118 | -2.167 |
| STAT3       | -0.174 | 0.887 | 8.600 | -0.836 |
| STAT4       | 1.375  | 2.595 | 4.037 | 2.652  |
| STAT6       | 0.332  | 1.258 | 4.617 | 1.309  |
| STAU2       | 0.568  | 1.482 | 6.038 | 2.567  |
| STC1        | 0.180  | 1.133 | 3.931 | 0.292  |
| STC2        | -0.135 | 0.911 | 3.032 | -0.375 |
| STEAP1B     | 0.053  | 1.038 | 2.272 | 0.215  |
| STEAP2      | 1.004  | 2.006 | 5.739 | 2.592  |
| STEAP3      | -0.664 | 0.631 | 5.279 | -1.694 |
| STEAP4      | 0.926  | 1.901 | 2.991 | 2.702  |
| STH         | -0.308 | 0.808 | 4.543 | -0.746 |



|                               |        |       |       |        |
|-------------------------------|--------|-------|-------|--------|
| STIL                          | 0.362  | 1.285 | 3.494 | 1.657  |
| STK10                         | -0.278 | 0.825 | 5.074 | -0.999 |
| STK24                         | 0.428  | 1.345 | 4.578 | 1.945  |
| STK32A                        | -1.447 | 0.367 | 5.702 | -3.497 |
| STK33                         | -0.407 | 0.754 | 4.488 | -1.434 |
| STMN2                         | 1.236  | 2.356 | 8.996 | 1.975  |
| STMN3                         | 0.685  | 1.608 | 6.579 | 2.376  |
| STMN4                         | 0.099  | 1.071 | 6.380 | 0.275  |
| STOM                          | 0.067  | 1.048 | 8.829 | 0.326  |
| STOML1                        | 0.177  | 1.130 | 4.569 | 0.731  |
| STON1-GTF2A1L//STON1//GTF2A1L | -1.248 | 0.421 | 4.166 | -3.019 |
| STOX1                         | 0.733  | 1.662 | 4.661 | 2.138  |
| STOX2                         | 0.182  | 1.134 | 6.123 | 0.924  |
| STPG1                         | 0.321  | 1.249 | 2.646 | 1.780  |
| STRBP                         | 0.903  | 1.870 | 5.317 | 3.026  |
| STRC                          | 0.515  | 1.429 | 3.458 | 2.346  |
| STRIP2                        | 0.535  | 1.449 | 4.418 | 1.652  |
| STS                           | 0.795  | 1.735 | 6.937 | 2.023  |
| STX11                         | 0.058  | 1.041 | 3.099 | 0.240  |
| STX1A                         | 1.075  | 2.107 | 4.267 | 3.343  |
| STX1B                         | 1.065  | 2.092 | 8.049 | 1.761  |
| STX2                          | -0.289 | 0.818 | 5.837 | -1.402 |
| STX4                          | -0.244 | 0.844 | 5.692 | -1.130 |
| STXBP1                        | 0.923  | 1.896 | 9.600 | 2.455  |
| STXBP2                        | -0.324 | 0.799 | 3.720 | -1.001 |
| STXBP3                        | -0.526 | 0.694 | 7.085 | -2.157 |
| STXBP5                        | 0.827  | 1.774 | 6.345 | 2.628  |
| STXBP5-AS1                    | 0.568  | 1.482 | 2.486 | 2.352  |
| STXBP5L                       | 1.249  | 2.377 | 6.955 | 3.158  |
| STXBP6                        | -0.022 | 0.985 | 4.742 | -0.108 |
| STYK1                         | 1.155  | 2.227 | 3.179 | 2.191  |
| STYX                          | -0.270 | 0.829 | 5.650 | -0.981 |
| SUCLA2                        | 0.336  | 1.263 | 6.792 | 1.693  |
| SUCLG2                        | 0.063  | 1.045 | 5.738 | 0.273  |
| SUDS3                         | 0.324  | 1.252 | 5.459 | 1.476  |
| SULF1                         | 0.446  | 1.362 | 4.457 | 1.650  |
| SULT1A2                       | -0.034 | 0.977 | 2.435 | -0.117 |
| SULT1B1                       | 0.533  | 1.447 | 2.258 | 2.068  |
| SULT1C4                       | -0.085 | 0.943 | 5.261 | -0.311 |
| SULT4A1                       | 1.299  | 2.461 | 5.892 | 2.082  |
| SUMO4                         | -0.157 | 0.897 | 5.816 | -0.490 |
| SUN2                          | -0.663 | 0.632 | 6.355 | -2.240 |
| SUN2                          | -0.193 | 0.875 | 3.494 | -0.706 |
| SUPV3L1                       | 0.236  | 1.178 | 5.928 | 1.221  |
| SUSD1                         | 0.447  | 1.364 | 5.105 | 1.398  |
| SUSD2                         | -0.830 | 0.562 | 4.849 | -1.812 |
| SUSD3                         | -0.481 | 0.716 | 3.571 | -1.471 |
| SUSD4                         | 0.853  | 1.806 | 4.732 | 1.873  |
| SUSD5                         | 0.632  | 1.550 | 4.466 | 2.529  |
| SUV39H2                       | 0.290  | 1.223 | 3.193 | 1.183  |

|                    |        |       |       |        |
|--------------------|--------|-------|-------|--------|
| SV2A               | 0.848  | 1.799 | 7.502 | 1.921  |
| SV2B               | 1.668  | 3.178 | 6.627 | 2.702  |
| SV2C               | 0.366  | 1.289 | 5.849 | 0.516  |
| SVEP1              | -0.156 | 0.897 | 3.597 | -0.526 |
| SVIL               | -0.296 | 0.814 | 4.821 | -1.177 |
| SVOP               | 1.252  | 2.382 | 4.940 | 2.513  |
| SYBU               | 0.660  | 1.580 | 4.825 | 1.504  |
| SYCE1              | 0.679  | 1.601 | 3.006 | 2.055  |
| SYDE1              | -0.316 | 0.804 | 3.439 | -1.399 |
| SYDE2              | 0.511  | 1.425 | 4.084 | 1.780  |
| SYK                | -0.898 | 0.537 | 4.020 | -2.755 |
| SYN1               | 1.326  | 2.507 | 7.087 | 2.148  |
| SYN2               | 1.443  | 2.719 | 6.939 | 2.086  |
| SYN3               | 0.773  | 1.708 | 4.304 | 1.784  |
| SYNDIG1L//TMEM90A  | -0.337 | 0.791 | 2.929 | -1.179 |
| SYNE1              | 0.632  | 1.550 | 6.685 | 2.155  |
| SYNE3              | -0.805 | 0.572 | 4.191 | -2.688 |
| SYNGAP1            | 0.721  | 1.648 | 5.584 | 2.414  |
| SYNGAP1            | 0.690  | 1.613 | 5.560 | 2.322  |
| SYNGR1             | 0.683  | 1.605 | 4.952 | 3.001  |
| SYNGR2             | -0.840 | 0.559 | 6.853 | -2.430 |
| SYNGR3             | 0.923  | 1.896 | 5.264 | 1.934  |
| SYNJ1              | 0.774  | 1.710 | 7.210 | 2.759  |
| SYNJ2              | -0.948 | 0.518 | 7.467 | -2.473 |
| SYNJ2-IT1          | -0.747 | 0.596 | 2.355 | -2.206 |
| SYNPO              | 0.346  | 1.271 | 4.606 | 1.032  |
| SYNPO2             | -0.028 | 0.981 | 6.259 | -0.117 |
| SYNPR              | 1.285  | 2.437 | 2.245 | 3.224  |
| SYP                | 0.526  | 1.440 | 5.512 | 1.596  |
| SYP-AS1            | 0.878  | 1.838 | 5.279 | 2.913  |
| SYPL1              | -0.886 | 0.541 | 7.031 | -2.727 |
| SYT1               | 1.562  | 2.953 | 4.700 | 2.862  |
| SYT10              | 0.489  | 1.403 | 4.350 | 1.300  |
| SYT12              | 0.562  | 1.476 | 2.887 | 2.182  |
| SYT13              | 1.188  | 2.279 | 4.542 | 2.455  |
| SYT14              | 0.461  | 1.377 | 5.530 | 1.803  |
| SYT16              | 1.392  | 2.625 | 4.374 | 2.762  |
| SYT17              | 0.456  | 1.372 | 6.014 | 1.638  |
| SYT2               | 0.900  | 1.866 | 5.961 | 1.098  |
| SYT3               | 0.573  | 1.488 | 4.235 | 1.465  |
| SYT4               | 1.518  | 2.864 | 7.506 | 1.948  |
| SYT5               | 1.002  | 2.003 | 5.664 | 2.368  |
| SYT6               | 0.191  | 1.142 | 3.287 | 0.635  |
| SYT7               | 1.730  | 3.318 | 4.035 | 3.263  |
| SYTL2              | 0.529  | 1.443 | 5.245 | 2.316  |
| SYTL3              | -0.090 | 0.939 | 4.419 | -0.224 |
| SYTL4              | -0.730 | 0.603 | 4.543 | -2.168 |
| SYTL5              | 0.496  | 1.410 | 3.672 | 0.917  |
| TAB1//LOC100506472 | -0.094 | 0.937 | 3.228 | -0.322 |
| TAB3-AS2           | 0.188  | 1.139 | 3.736 | 0.667  |

|                                  |        |       |       |        |
|----------------------------------|--------|-------|-------|--------|
| TAC1                             | 0.317  | 1.246 | 3.284 | 0.594  |
| TAC3                             | 0.664  | 1.585 | 3.700 | 1.397  |
| TACC2                            | 0.364  | 1.287 | 4.153 | 1.479  |
| TACR1                            | 0.098  | 1.071 | 3.653 | 0.376  |
| TACR2                            | -0.197 | 0.873 | 3.054 | -0.668 |
| TACR3                            | -0.868 | 0.548 | 2.833 | -2.635 |
| TADA1                            | 0.302  | 1.233 | 4.715 | 1.411  |
| TAF1D//SNORA8//SNORA1//SNORA18// | 0.476  | 1.390 | 6.145 | 2.035  |
| TAF4B                            | 0.615  | 1.531 | 5.178 | 2.500  |
| TAF5                             | 0.171  | 1.126 | 4.437 | 0.789  |
| TAGAP                            | -0.348 | 0.786 | 3.423 | -0.914 |
| TAGLN                            | 0.008  | 1.006 | 5.023 | 0.024  |
| TAGLN2                           | -0.322 | 0.800 | 2.879 | -1.221 |
| TAGLN3                           | 0.913  | 1.883 | 6.386 | 2.172  |
| TAL1                             | -0.822 | 0.566 | 2.694 | -3.476 |
| TALDO1                           | -0.539 | 0.688 | 5.122 | -2.333 |
| TANC1                            | -0.878 | 0.544 | 6.402 | -2.680 |
| TANC2                            | 0.205  | 1.153 | 7.452 | 1.026  |
| TAP1//PSMB8-AS1                  | 0.134  | 1.098 | 4.608 | 0.574  |
| TAP1//PSMB8-AS1                  | 0.097  | 1.069 | 4.822 | 0.422  |
| TAPBPL                           | -0.397 | 0.760 | 3.795 | -1.810 |
| TARBP1                           | 0.465  | 1.380 | 4.951 | 1.447  |
| TAS2R10                          | 0.329  | 1.256 | 2.561 | 1.128  |
| TAS2R13                          | -0.338 | 0.791 | 3.442 | -0.988 |
| TAS2R14                          | -0.388 | 0.764 | 4.239 | -0.907 |
| TAS2R19                          | -0.158 | 0.896 | 2.727 | -0.538 |
| TAS2R20                          | -0.257 | 0.837 | 3.073 | -0.688 |
| TAS2R3                           | -0.185 | 0.880 | 4.775 | -0.687 |
| TAS2R31//TAS2R45                 | -0.281 | 0.823 | 3.809 | -0.795 |
| TAS2R4                           | -0.286 | 0.820 | 4.193 | -0.918 |
| TBC1D12                          | -0.920 | 0.528 | 6.320 | -2.576 |
| TBC1D2                           | -0.403 | 0.756 | 5.653 | -1.305 |
| TBC1D22B                         | 0.032  | 1.023 | 5.595 | 0.139  |
| TBC1D24                          | 0.840  | 1.790 | 5.603 | 2.375  |
| TBC1D2B                          | 0.038  | 1.026 | 4.550 | 0.147  |
| TBC1D30                          | 0.748  | 1.680 | 5.302 | 1.926  |
| TBC1D4                           | 0.148  | 1.108 | 5.122 | 0.499  |
| TBC1D9                           | 0.766  | 1.701 | 6.046 | 2.670  |
| TBKBP1                           | 0.456  | 1.371 | 4.613 | 1.709  |
| TBPL1                            | 0.390  | 1.310 | 4.735 | 1.514  |
| TBR1                             | 1.967  | 3.908 | 3.143 | 2.970  |
| TBRG1                            | 0.565  | 1.479 | 5.326 | 2.968  |
| TBX10                            | -0.344 | 0.788 | 2.605 | -1.263 |
| TBX15                            | 0.884  | 1.845 | 3.033 | 3.089  |
| TBX3                             | 0.250  | 1.189 | 3.646 | 0.917  |
| TBXAS1                           | -0.452 | 0.731 | 3.544 | -1.461 |
| TC2N                             | 0.801  | 1.742 | 5.326 | 1.574  |
| TCEA3                            | 0.077  | 1.055 | 3.907 | 0.323  |
| TCEAL5                           | 0.597  | 1.513 | 5.209 | 2.269  |
| TCEB3-AS1//RP5-886K2.3           | -0.283 | 0.822 | 4.039 | -1.156 |

|                                    |        |       |       |        |
|------------------------------------|--------|-------|-------|--------|
| TCEB3C//LOC101929870//LOC10106046  | -0.177 | 0.885 | 3.440 | -0.588 |
| TCEB3CL2//TCEB3C//LOC101060464//LC | -0.427 | 0.744 | 2.660 | -2.014 |
| TCERG1L                            | 0.379  | 1.300 | 3.766 | 1.009  |
| TCF12                              | -0.691 | 0.619 | 6.651 | -3.084 |
| TCF19                              | -0.254 | 0.839 | 2.894 | -1.001 |
| TCFL5                              | -0.685 | 0.622 | 6.518 | -2.903 |
| TCIRG1                             | -0.209 | 0.865 | 4.539 | -0.958 |
| TCN2                               | 0.149  | 1.109 | 3.989 | 0.634  |
| TCP10L//LINC00846                  | -0.212 | 0.863 | 3.633 | -0.650 |
| TCP11L1                            | 0.276  | 1.211 | 4.855 | 1.429  |
| TCP11L2                            | -0.804 | 0.573 | 5.698 | -2.745 |
| TCTE1                              | -0.070 | 0.952 | 2.555 | -0.268 |
| TCTEX1D1                           | -0.077 | 0.948 | 2.843 | -0.182 |
| TDH                                | -0.073 | 0.951 | 2.887 | -0.242 |
| TDO2                               | 1.043  | 2.061 | 1.702 | 3.566  |
| TDRD9                              | 0.170  | 1.125 | 2.490 | 0.542  |
| TDRKH                              | 0.325  | 1.252 | 5.436 | 1.385  |
| TDRP                               | 0.179  | 1.132 | 4.680 | 0.704  |
| TEAD2                              | 0.529  | 1.443 | 3.429 | 1.713  |
| TEAD3                              | 0.466  | 1.382 | 3.002 | 1.722  |
| TECTA                              | -0.061 | 0.958 | 3.552 | -0.276 |
| TEF                                | 0.338  | 1.264 | 4.188 | 1.303  |
| TEK                                | 0.189  | 1.140 | 5.152 | 0.711  |
| TEKT1                              | -0.194 | 0.874 | 2.458 | -0.391 |
| TEKT2                              | -0.051 | 0.965 | 2.291 | -0.206 |
| TEKT4                              | -0.193 | 0.875 | 2.682 | -0.728 |
| TEKT4P2//MAFIP//LOC100233156       | -1.000 | 0.500 | 4.451 | -1.928 |
| TENC1                              | -0.364 | 0.777 | 5.940 | -1.522 |
| TENM1                              | 0.601  | 1.517 | 5.751 | 1.734  |
| TENM2                              | 1.032  | 2.046 | 4.743 | 2.097  |
| TENM3                              | 0.450  | 1.366 | 5.265 | 1.228  |
| TENM4//ODZ4                        | -0.037 | 0.974 | 2.449 | -0.125 |
| TEP1                               | -0.464 | 0.725 | 4.686 | -1.736 |
| TERC                               | -0.136 | 0.910 | 5.601 | -0.558 |
| TERF2IP                            | 0.496  | 1.410 | 3.220 | 1.374  |
| TES                                | -0.193 | 0.875 | 2.560 | -0.621 |
| TESC                               | 0.791  | 1.730 | 3.363 | 2.320  |
| TESK2                              | -0.921 | 0.528 | 5.406 | -3.068 |
| TESPA1                             | 2.945  | 7.701 | 4.465 | 3.190  |
| TEX10                              | 0.318  | 1.246 | 5.375 | 1.665  |
| TEX26                              | 0.161  | 1.118 | 2.263 | 0.584  |
| TEX29                              | 1.133  | 2.193 | 3.149 | 3.423  |
| TEX30                              | 0.095  | 1.068 | 3.892 | 0.520  |
| TEX9                               | -0.184 | 0.880 | 3.241 | -0.872 |
| TF                                 | -1.231 | 0.426 | 9.937 | -2.734 |
| TFB2M                              | 0.169  | 1.124 | 4.975 | 0.687  |
| TFEC                               | -0.167 | 0.891 | 2.130 | -0.741 |
| TFPI                               | -0.102 | 0.932 | 2.597 | -0.394 |
| TFPT                               | 0.394  | 1.314 | 7.010 | 1.629  |
| TFR2                               | 0.634  | 1.552 | 2.607 | 1.891  |

|                          |        |       |       |        |
|--------------------------|--------|-------|-------|--------|
| TFRC                     | 0.652  | 1.571 | 6.156 | 2.452  |
| TGFA                     | -0.886 | 0.541 | 4.530 | -2.643 |
| TGFB1                    | -0.503 | 0.706 | 5.654 | -1.902 |
| TGFB1I1                  | -0.256 | 0.837 | 4.587 | -0.809 |
| TGFB2                    | 0.454  | 1.369 | 7.469 | 1.471  |
| TGFB2-AS1//RP11-224O19.2 | -0.330 | 0.796 | 2.177 | -1.068 |
| TGFB3                    | -0.647 | 0.639 | 4.927 | -1.666 |
| TGFBI                    | 0.395  | 1.315 | 3.997 | 1.166  |
| TGFBR1                   | -0.220 | 0.859 | 6.431 | -0.706 |
| TGFBR2                   | -0.227 | 0.854 | 6.441 | -0.878 |
| TGFBR3L                  | 0.410  | 1.328 | 4.017 | 1.189  |
| TGIF1                    | -0.083 | 0.944 | 3.046 | -0.374 |
| TGM2                     | 0.535  | 1.449 | 5.901 | 1.562  |
| THAP10                   | 0.227  | 1.170 | 4.059 | 0.821  |
| THAP9                    | -0.577 | 0.670 | 3.240 | -1.763 |
| THAP9-AS1                | 0.414  | 1.332 | 4.397 | 1.575  |
| THBD                     | 0.264  | 1.201 | 3.609 | 0.701  |
| THBS1                    | 0.400  | 1.319 | 5.555 | 0.991  |
| THBS2                    | -0.678 | 0.625 | 7.091 | -2.252 |
| THBS4                    | -0.465 | 0.725 | 5.278 | -1.559 |
| THEM6                    | 0.008  | 1.006 | 4.153 | 0.032  |
| THEMIS                   | 0.291  | 1.224 | 2.395 | 1.168  |
| THEMIS2                  | -0.354 | 0.782 | 5.230 | -0.837 |
| THNSL2                   | -0.392 | 0.762 | 4.226 | -1.003 |
| THPO                     | 0.118  | 1.085 | 2.814 | 0.400  |
| THRB                     | 1.173  | 2.255 | 5.246 | 2.579  |
| THRB-IT1                 | 0.711  | 1.636 | 2.512 | 1.996  |
| THSD1                    | 0.633  | 1.550 | 3.586 | 2.408  |
| THSD4                    | 0.594  | 1.509 | 3.873 | 2.117  |
| THUMPD2                  | 0.321  | 1.249 | 4.021 | 1.562  |
| THY1                     | 0.484  | 1.399 | 3.631 | 1.193  |
| THYN1                    | 0.445  | 1.361 | 5.199 | 1.970  |
| TIA1                     | -0.335 | 0.793 | 5.822 | -1.328 |
| TIAM2                    | 1.090  | 2.129 | 3.511 | 2.826  |
| TIFA                     | 0.513  | 1.427 | 3.228 | 1.774  |
| TIGD2                    | -0.391 | 0.763 | 2.900 | -1.662 |
| TIMELESS                 | -0.170 | 0.889 | 3.314 | -0.594 |
| TIMM22                   | 0.023  | 1.016 | 6.086 | 0.084  |
| TIMM23B                  | -0.101 | 0.933 | 4.777 | -0.365 |
| TIMM8A                   | 0.093  | 1.066 | 4.594 | 0.446  |
| TIMP1                    | 0.180  | 1.133 | 6.705 | 0.583  |
| TIMP2                    | -0.340 | 0.790 | 7.751 | -1.481 |
| TIMP3                    | -0.006 | 0.996 | 7.601 | -0.025 |
| TIMP4                    | -0.737 | 0.600 | 5.236 | -1.711 |
| TIPARP                   | 0.193  | 1.143 | 7.210 | 0.592  |
| TIPRL                    | 0.432  | 1.349 | 5.869 | 1.703  |
| TJAP1                    | -0.861 | 0.550 | 5.206 | -2.382 |
| TJP2                     | -0.952 | 0.517 | 7.171 | -2.566 |
| TK2                      | 0.060  | 1.042 | 2.898 | 0.230  |
| TLCD2                    | 0.102  | 1.073 | 2.926 | 0.380  |

|                         |        |       |       |        |
|-------------------------|--------|-------|-------|--------|
| TLE1                    | 0.190  | 1.141 | 5.098 | 0.843  |
| TLE2                    | -0.055 | 0.963 | 5.016 | -0.258 |
| TLL1                    | 0.561  | 1.475 | 3.663 | 2.378  |
| TLL2                    | -0.760 | 0.591 | 3.310 | -2.120 |
| TLN1                    | -0.672 | 0.628 | 6.876 | -2.848 |
| TLN2                    | 0.327  | 1.254 | 6.314 | 1.694  |
| TLR1                    | -0.138 | 0.909 | 4.220 | -0.356 |
| TLR10                   | -0.401 | 0.758 | 3.516 | -1.035 |
| TLR2                    | 0.069  | 1.049 | 5.295 | 0.151  |
| TLR3                    | -0.415 | 0.750 | 4.425 | -1.067 |
| TLR4                    | -0.687 | 0.621 | 6.039 | -1.980 |
| TLR5                    | -0.003 | 0.998 | 4.873 | -0.008 |
| TLR6                    | -0.434 | 0.740 | 3.145 | -1.441 |
| TLR7                    | -0.604 | 0.658 | 4.147 | -1.473 |
| TLR8                    | -0.282 | 0.823 | 2.090 | -0.745 |
| TM2D2                   | 0.202  | 1.150 | 4.348 | 0.867  |
| TM4SF1                  | 0.431  | 1.348 | 6.690 | 1.509  |
| TM4SF18                 | 0.324  | 1.252 | 3.647 | 1.217  |
| TM6SF1                  | 0.501  | 1.415 | 5.910 | 1.861  |
| TMBIM1//MIR6513         | -0.269 | 0.830 | 3.764 | -0.792 |
| TMBIM4//RP11-745O10.4   | -0.445 | 0.735 | 4.682 | -1.817 |
| TMC1                    | 0.040  | 1.028 | 2.380 | 0.184  |
| TMC6                    | -0.882 | 0.543 | 5.321 | -2.203 |
| TMC7                    | -1.050 | 0.483 | 6.849 | -2.342 |
| TMC8                    | -0.110 | 0.927 | 3.449 | -0.368 |
| TMCC1-AS1//AL449209.1   | 0.129  | 1.094 | 4.170 | 0.504  |
| TMCC2                   | -0.351 | 0.784 | 3.392 | -1.360 |
| TMCC3                   | -0.899 | 0.536 | 5.658 | -2.823 |
| TMCO4                   | -0.124 | 0.918 | 2.746 | -0.452 |
| TMCO6                   | -0.344 | 0.788 | 3.759 | -1.425 |
| TMED8                   | 0.376  | 1.298 | 6.114 | 1.505  |
| TMEFF2                  | 0.248  | 1.187 | 5.590 | 1.036  |
| TMEM104                 | -0.628 | 0.647 | 5.347 | -2.320 |
| TMEM106A                | -0.736 | 0.600 | 4.369 | -2.824 |
| TMEM108                 | 0.630  | 1.548 | 2.842 | 2.024  |
| TMEM119                 | -0.666 | 0.630 | 3.965 | -1.927 |
| TMEM125                 | -0.286 | 0.820 | 2.612 | -1.075 |
| TMEM130                 | 1.213  | 2.318 | 6.640 | 1.833  |
| TMEM132B                | 0.985  | 1.979 | 4.854 | 2.628  |
| TMEM132D                | 1.184  | 2.273 | 3.848 | 2.792  |
| TMEM132E                | -0.284 | 0.821 | 5.117 | -0.918 |
| TMEM139                 | -1.540 | 0.344 | 3.468 | -3.390 |
| TMEM139//AC073342.12    | -1.041 | 0.486 | 4.204 | -2.832 |
| TMEM140                 | -1.427 | 0.372 | 5.589 | -2.612 |
| TMEM144                 | -0.804 | 0.573 | 6.780 | -1.933 |
| TMEM145                 | 0.449  | 1.365 | 4.900 | 1.438  |
| TMEM14A                 | 0.297  | 1.228 | 7.129 | 1.410  |
| TMEM150C                | 0.726  | 1.654 | 6.778 | 2.277  |
| TMEM151A                | -0.776 | 0.584 | 6.001 | -2.693 |
| TMEM151B//RP11-444E17.6 | 0.452  | 1.368 | 2.154 | 1.386  |

|                         |        |       |       |        |
|-------------------------|--------|-------|-------|--------|
| TMEM155                 | 1.940  | 3.836 | 2.984 | 3.199  |
| TMEM156                 | -0.449 | 0.732 | 3.825 | -1.292 |
| TMEM158                 | 0.415  | 1.333 | 4.245 | 1.142  |
| TMEM160                 | 0.290  | 1.223 | 4.763 | 1.091  |
| TMEM163                 | 0.184  | 1.136 | 5.920 | 0.713  |
| TMEM165                 | -0.906 | 0.534 | 7.445 | -2.103 |
| TMEM168                 | -0.162 | 0.894 | 5.417 | -0.582 |
| TMEM169                 | -0.050 | 0.966 | 3.084 | -0.159 |
| TMEM17                  | 0.296  | 1.228 | 2.810 | 1.372  |
| TMEM170B                | 0.303  | 1.234 | 5.598 | 1.354  |
| TMEM173                 | -0.128 | 0.915 | 3.001 | -0.449 |
| TMEM176A                | -0.634 | 0.644 | 4.256 | -2.407 |
| TMEM176B                | -0.729 | 0.603 | 5.808 | -2.569 |
| TMEM177                 | 0.523  | 1.437 | 4.725 | 2.336  |
| TMEM178B                | 0.646  | 1.565 | 5.781 | 1.698  |
| TMEM179                 | 0.189  | 1.140 | 4.389 | 0.663  |
| TMEM179                 | 0.058  | 1.041 | 3.556 | 0.260  |
| TMEM179B//MIR6748       | -0.449 | 0.733 | 4.957 | -1.619 |
| TMEM181                 | 0.235  | 1.177 | 6.666 | 1.107  |
| TMEM183B//RP11-651P23.4 | 0.393  | 1.313 | 5.776 | 1.543  |
| TMEM185A                | 0.424  | 1.342 | 4.532 | 1.627  |
| TMEM196                 | 0.616  | 1.533 | 4.624 | 1.245  |
| TMEM198                 | 0.135  | 1.098 | 3.437 | 0.522  |
| TMEM198B                | -0.626 | 0.648 | 5.405 | -2.128 |
| TMEM2                   | 0.628  | 1.545 | 5.443 | 2.477  |
| TMEM200A                | 0.221  | 1.165 | 2.736 | 0.931  |
| TMEM204                 | 0.193  | 1.143 | 4.303 | 0.615  |
| TMEM206                 | -0.852 | 0.554 | 5.148 | -2.107 |
| TMEM220                 | -0.168 | 0.890 | 3.948 | -0.681 |
| TMEM221                 | 0.420  | 1.338 | 2.972 | 1.215  |
| TMEM229A                | -0.488 | 0.713 | 3.751 | -2.093 |
| TMEM229B                | 0.602  | 1.518 | 2.988 | 2.142  |
| TMEM232                 | 0.308  | 1.238 | 3.949 | 1.136  |
| TMEM235                 | -0.622 | 0.650 | 3.745 | -1.824 |
| TMEM240                 | 0.766  | 1.701 | 3.746 | 1.877  |
| TMEM241                 | 0.706  | 1.631 | 4.068 | 2.408  |
| TMEM242                 | 0.286  | 1.219 | 5.584 | 1.380  |
| TMEM25                  | 0.391  | 1.311 | 4.552 | 1.597  |
| TMEM254-AS1             | 0.164  | 1.120 | 2.409 | 0.555  |
| TMEM255A                | -1.117 | 0.461 | 6.551 | -2.504 |
| TMEM255B                | -0.096 | 0.936 | 3.527 | -0.384 |
| TMEM257                 | 0.044  | 1.031 | 4.915 | 0.151  |
| TMEM30B                 | 0.198  | 1.147 | 2.428 | 0.472  |
| TMEM35                  | 0.701  | 1.626 | 5.040 | 1.394  |
| TMEM38A                 | 0.409  | 1.328 | 5.258 | 1.410  |
| TMEM38B                 | -0.434 | 0.740 | 5.276 | -1.717 |
| TMEM44                  | 0.386  | 1.307 | 3.302 | 1.420  |
| TMEM44-AS1              | -0.940 | 0.521 | 3.400 | -3.223 |
| TMEM45A                 | -0.504 | 0.705 | 2.775 | -1.887 |
| TMEM51                  | -0.112 | 0.925 | 2.933 | -0.400 |

|                               |        |       |       |        |
|-------------------------------|--------|-------|-------|--------|
| TMEM56//TMEM56-RWDD3//RWDD3// | 0.079  | 1.056 | 5.266 | 0.447  |
| TMEM59L                       | 0.697  | 1.621 | 6.330 | 1.654  |
| TMEM60                        | 0.264  | 1.201 | 4.654 | 1.234  |
| TMEM61                        | 0.180  | 1.133 | 2.292 | 0.759  |
| TMEM63A                       | -1.303 | 0.405 | 7.885 | -2.756 |
| TMEM63C                       | 0.390  | 1.310 | 5.792 | 1.293  |
| TMEM65                        | 0.571  | 1.486 | 6.905 | 2.471  |
| TMEM67                        | 0.327  | 1.254 | 4.277 | 1.277  |
| TMEM70                        | 0.074  | 1.053 | 3.186 | 0.346  |
| TMEM71                        | 0.052  | 1.037 | 2.326 | 0.175  |
| TMEM72-AS1                    | 0.249  | 1.188 | 2.768 | 0.874  |
| TMEM74B                       | 0.713  | 1.639 | 3.162 | 2.056  |
| TMEM81                        | 0.149  | 1.108 | 3.076 | 0.542  |
| TMEM87A                       | -0.687 | 0.621 | 7.126 | -2.473 |
| TMEM88                        | -0.385 | 0.766 | 3.331 | -1.035 |
| TMEM88B                       | -0.764 | 0.589 | 6.518 | -2.073 |
| TMEM98                        | -0.855 | 0.553 | 6.465 | -2.055 |
| TMEM9B-AS1                    | -0.836 | 0.560 | 4.828 | -2.155 |
| TMIE                          | -0.361 | 0.779 | 3.946 | -1.296 |
| TMOD1                         | 0.210  | 1.157 | 7.913 | 0.798  |
| TMOD2                         | 0.665  | 1.586 | 8.610 | 2.604  |
| TMPRSS3                       | 0.430  | 1.347 | 2.536 | 1.339  |
| TMPRSS5                       | -0.384 | 0.766 | 3.926 | -0.977 |
| TMSB4X                        | -0.043 | 0.970 | 5.326 | -0.173 |
| TMSB4XP4                      | -0.003 | 0.998 | 4.348 | -0.010 |
| TMSB4Y                        | -0.534 | 0.691 | 2.674 | -1.178 |
| TMTC1                         | 0.505  | 1.419 | 6.189 | 2.202  |
| TMTC2                         | -0.790 | 0.578 | 6.151 | -2.172 |
| TMTC3                         | 0.300  | 1.231 | 6.648 | 1.536  |
| TMTC4                         | -0.531 | 0.692 | 6.227 | -1.493 |
| TMX3                          | 0.395  | 1.315 | 6.055 | 1.735  |
| TMX4                          | 0.606  | 1.522 | 7.453 | 2.351  |
| TNC                           | -1.191 | 0.438 | 5.863 | -2.277 |
| TNFAIP2                       | -0.086 | 0.942 | 4.348 | -0.332 |
| TNFAIP3                       | -0.162 | 0.894 | 5.136 | -0.409 |
| TNFAIP6                       | 0.028  | 1.020 | 3.513 | 0.100  |
| TNFAIP8                       | -0.280 | 0.824 | 2.198 | -1.229 |
| TNFAIP8L1                     | 0.797  | 1.738 | 3.211 | 2.032  |
| TNFAIP8L3                     | 0.319  | 1.248 | 4.226 | 1.175  |
| TNFRSF10C//LOC254896          | 0.252  | 1.191 | 3.218 | 0.938  |
| TNFRSF10D                     | -0.451 | 0.731 | 3.242 | -1.643 |
| TNFRSF11A                     | 0.298  | 1.230 | 3.343 | 1.149  |
| TNFRSF11B                     | 0.642  | 1.560 | 4.103 | 2.056  |
| TNFRSF12A                     | 0.052  | 1.037 | 5.414 | 0.148  |
| TNFRSF13C                     | -0.152 | 0.900 | 2.456 | -0.429 |
| TNFRSF14                      | 0.071  | 1.051 | 3.469 | 0.223  |
| TNFRSF1A                      | -0.342 | 0.789 | 5.557 | -1.527 |
| TNFRSF1B                      | -0.251 | 0.840 | 6.924 | -0.552 |
| TNFRSF21                      | -0.492 | 0.711 | 7.681 | -1.505 |
| TNFRSF25                      | 0.576  | 1.490 | 3.438 | 2.056  |



|                    |        |       |       |        |
|--------------------|--------|-------|-------|--------|
| TNFSF10            | -0.227 | 0.854 | 4.997 | -0.567 |
| TNFSF13B           | 0.208  | 1.155 | 3.813 | 0.700  |
| TNFSF14            | -0.146 | 0.903 | 2.769 | -0.638 |
| TNFSF8             | -0.150 | 0.901 | 2.601 | -0.436 |
| TNKS               | -0.198 | 0.872 | 6.799 | -0.943 |
| TNNC1              | -0.036 | 0.975 | 2.348 | -0.121 |
| TNNT1              | 0.623  | 1.540 | 2.379 | 2.432  |
| TNNT2              | 0.902  | 1.868 | 2.399 | 3.121  |
| TNRC6C-AS1         | -1.164 | 0.446 | 5.361 | -2.556 |
| TNS1               | -0.587 | 0.666 | 4.777 | -2.069 |
| TNS3               | -0.518 | 0.698 | 5.303 | -2.756 |
| TNXB               | 0.432  | 1.349 | 4.100 | 1.759  |
| TNXB               | 0.287  | 1.220 | 4.426 | 1.078  |
| TNXB//TNXA         | 0.221  | 1.165 | 4.513 | 0.922  |
| TNXB//TNXA         | 0.122  | 1.089 | 4.641 | 0.474  |
| TNXB//TNXA         | 0.042  | 1.030 | 4.335 | 0.166  |
| TOB2               | -0.502 | 0.706 | 5.096 | -1.903 |
| TOB2P1             | -0.146 | 0.904 | 2.635 | -0.511 |
| TOLLIP             | 0.468  | 1.383 | 5.808 | 2.033  |
| TOM1L1             | -0.010 | 0.993 | 6.078 | -0.030 |
| TOMM20             | 0.431  | 1.348 | 6.539 | 1.913  |
| TOMM34             | 0.697  | 1.621 | 6.618 | 2.308  |
| TOMM40L            | 0.429  | 1.347 | 4.274 | 1.949  |
| TOMM70A            | 0.406  | 1.325 | 6.493 | 2.170  |
| TOR1A              | 0.328  | 1.256 | 6.492 | 1.515  |
| TOX                | 1.112  | 2.161 | 6.481 | 3.645  |
| TOX2//C20orf100    | 0.418  | 1.336 | 3.610 | 1.349  |
| TP53               | -0.072 | 0.952 | 4.964 | -0.252 |
| TP53I3             | -0.163 | 0.893 | 3.567 | -0.581 |
| TP53INP1           | -0.484 | 0.715 | 4.184 | -1.734 |
| TP53INP2           | -1.177 | 0.442 | 7.811 | -2.894 |
| TP53RK             | -0.281 | 0.823 | 4.339 | -1.128 |
| TP53TG5            | -0.653 | 0.636 | 4.318 | -1.676 |
| TPBG               | 0.239  | 1.180 | 2.735 | 0.807  |
| TPBGL              | -0.414 | 0.750 | 3.117 | -1.227 |
| TPCN1              | -0.555 | 0.681 | 5.850 | -2.162 |
| TPD52L1            | 0.006  | 1.004 | 5.626 | 0.023  |
| TPGS1              | 0.208  | 1.155 | 3.053 | 0.724  |
| TPI1               | 0.410  | 1.329 | 4.367 | 1.500  |
| TPM2               | -0.150 | 0.901 | 3.965 | -0.568 |
| TPMT               | 0.619  | 1.536 | 6.387 | 2.089  |
| TPPP               | -0.041 | 0.972 | 8.980 | -0.195 |
| TPPP3              | -0.713 | 0.610 | 7.821 | -1.744 |
| TPRG1L             | 0.624  | 1.542 | 7.471 | 2.210  |
| TPRN               | -0.444 | 0.735 | 2.976 | -1.620 |
| TPSB2//TPSAB1      | 0.367  | 1.290 | 2.542 | 0.996  |
| TPSD1              | 0.010  | 1.007 | 2.161 | 0.039  |
| TPST1              | 0.232  | 1.175 | 5.041 | 0.771  |
| TPT1//LOC101928826 | -0.667 | 0.630 | 7.722 | -2.434 |
| TPTE2P1            | 0.300  | 1.231 | 4.739 | 0.767  |

|                       |        |       |       |        |
|-----------------------|--------|-------|-------|--------|
| TPTE2P5               | -0.068 | 0.954 | 3.209 | -0.235 |
| TPX2                  | 0.936  | 1.913 | 2.743 | 2.709  |
| TRADD                 | -0.112 | 0.925 | 4.069 | -0.402 |
| TRAF1                 | -0.810 | 0.570 | 4.081 | -2.368 |
| TRAF3IP3              | -0.359 | 0.780 | 2.685 | -1.240 |
| TRAF5                 | 0.470  | 1.385 | 3.327 | 2.106  |
| TRAFD1                | -0.683 | 0.623 | 5.084 | -2.502 |
| TRAJ11                | -0.059 | 0.960 | 2.800 | -0.281 |
| TRAJ32//YME1L1        | -0.350 | 0.785 | 2.308 | -1.111 |
| TRAJ59                | -0.786 | 0.580 | 2.737 | -1.462 |
| TRAK2                 | -0.670 | 0.629 | 7.677 | -2.626 |
| TRAM1                 | -0.142 | 0.906 | 2.492 | -0.525 |
| TRAM1L1               | -0.163 | 0.893 | 2.410 | -0.808 |
| TRANK1                | 0.821  | 1.766 | 5.375 | 2.167  |
| TRAPPC13//CTC-534A2.2 | 0.289  | 1.222 | 4.765 | 1.098  |
| TRAPPC2               | 0.136  | 1.099 | 2.437 | 0.472  |
| TRAPPC6B              | 0.651  | 1.570 | 6.912 | 2.540  |
| TRAV1-1               | 0.062  | 1.044 | 2.982 | 0.209  |
| TRAV38-1//YME1L1      | 0.161  | 1.118 | 3.670 | 0.527  |
| TRAV38-2DV8//YME1L1   | -0.404 | 0.756 | 3.313 | -0.992 |
| TRBC2//IL23A          | 0.759  | 1.692 | 5.188 | 1.962  |
| TRBJ2-1//IL23A        | 0.387  | 1.308 | 2.681 | 1.332  |
| TRBJ2-5//EPC1         | -0.566 | 0.675 | 2.263 | -1.709 |
| TRBJ2-7//IL23A        | 0.081  | 1.058 | 3.456 | 0.215  |
| TRBV20OR9-2           | 0.088  | 1.063 | 3.037 | 0.311  |
| TRBV23-1              | -0.140 | 0.908 | 3.521 | -0.369 |
| TRBV7-1//TRBV7-2      | -0.441 | 0.737 | 2.945 | -1.626 |
| TRDN                  | 0.205  | 1.153 | 3.697 | 0.668  |
| TREM1                 | 0.082  | 1.058 | 3.254 | 0.261  |
| TREM2                 | -0.426 | 0.744 | 5.456 | -1.086 |
| TREML1                | -0.530 | 0.693 | 2.450 | -1.682 |
| TRERF1                | 0.563  | 1.477 | 4.454 | 1.548  |
| TRGJ2//TRGJ1//TARP    | 0.020  | 1.014 | 2.280 | 0.052  |
| TRGJP1//TARP          | 0.175  | 1.129 | 2.730 | 0.273  |
| TRGJP2//TARP//TRGC2   | 0.708  | 1.633 | 4.754 | 0.928  |
| TRGV9//TARP           | -0.116 | 0.923 | 2.302 | -0.414 |
| TRH                   | -0.434 | 0.740 | 3.001 | -1.567 |
| TRHDE                 | 1.773  | 3.418 | 4.042 | 3.237  |
| TRHDE-AS1             | 0.938  | 1.915 | 3.132 | 2.358  |
| TRIB1                 | 0.109  | 1.079 | 4.300 | 0.428  |
| TRIL                  | -0.532 | 0.691 | 6.247 | -1.453 |
| TRIM17                | 0.392  | 1.312 | 3.003 | 1.309  |
| TRIM21                | -0.182 | 0.881 | 3.546 | -0.615 |
| TRIM22                | -0.014 | 0.991 | 5.857 | -0.049 |
| TRIM23                | 0.262  | 1.200 | 6.071 | 1.241  |
| TRIM32                | 0.323  | 1.251 | 4.286 | 1.230  |
| TRIM36                | 0.150  | 1.110 | 4.060 | 0.629  |
| TRIM37                | 0.928  | 1.902 | 7.967 | 2.943  |
| TRIM38                | -0.387 | 0.765 | 5.065 | -1.148 |
| TRIM47                | 0.079  | 1.056 | 4.922 | 0.269  |

|                |        |       |       |        |
|----------------|--------|-------|-------|--------|
| TRIM5          | 0.044  | 1.031 | 3.213 | 0.203  |
| TRIM52         | -0.186 | 0.879 | 5.138 | -0.861 |
| TRIM56         | -0.441 | 0.737 | 5.136 | -1.896 |
| TRIM59         | -0.710 | 0.611 | 3.706 | -1.672 |
| TRIM61         | -0.482 | 0.716 | 2.824 | -1.583 |
| TRIM62         | -0.985 | 0.505 | 4.589 | -3.411 |
| TRIM65         | -0.152 | 0.900 | 4.947 | -0.585 |
| TRIM66         | -0.661 | 0.632 | 4.043 | -1.886 |
| TRIM66         | 0.121  | 1.088 | 3.784 | 0.380  |
| TRIM74         | -0.711 | 0.611 | 3.450 | -2.092 |
| TRIM9          | 0.291  | 1.223 | 6.619 | 1.370  |
| TRIO           | 0.432  | 1.350 | 6.167 | 1.834  |
| TRIOBP//NOL12  | -0.286 | 0.820 | 3.161 | -1.299 |
| TRIP10         | 0.281  | 1.215 | 4.797 | 1.193  |
| TRIP6//MIR6875 | -0.294 | 0.816 | 5.443 | -0.976 |
| TRIQK          | 0.393  | 1.313 | 3.477 | 1.386  |
| TRMT12         | 0.055  | 1.039 | 4.550 | 0.234  |
| TRMT61B        | -0.226 | 0.855 | 4.131 | -0.971 |
| TRNP1          | 0.528  | 1.442 | 4.485 | 1.405  |
| TRO            | 0.319  | 1.248 | 3.392 | 1.438  |
| TRPC3          | -0.065 | 0.956 | 2.347 | -0.189 |
| TRPC4          | 0.932  | 1.908 | 3.601 | 2.671  |
| TRPC5          | 0.830  | 1.778 | 4.338 | 1.409  |
| TRPC6          | 0.931  | 1.907 | 2.333 | 3.514  |
| TRPM3          | -0.466 | 0.724 | 7.404 | -1.326 |
| TRPM4          | 0.087  | 1.062 | 4.080 | 0.337  |
| TRPM6          | -0.708 | 0.612 | 4.031 | -1.929 |
| TRPS1          | -0.525 | 0.695 | 6.464 | -2.354 |
| TRPV5          | -1.113 | 0.462 | 3.391 | -2.505 |
| TRUB1          | 0.672  | 1.594 | 5.020 | 2.977  |
| TRUB2          | 0.123  | 1.089 | 6.312 | 0.587  |
| TSC22D1        | 0.393  | 1.313 | 4.952 | 1.810  |
| TSC22D1-AS1    | 0.417  | 1.335 | 4.251 | 1.832  |
| TSC22D2        | 0.622  | 1.539 | 5.713 | 2.025  |
| TSC22D4        | -0.660 | 0.633 | 4.887 | -2.282 |
| TSEN54         | -0.492 | 0.711 | 3.631 | -2.019 |
| TSHR           | -0.080 | 0.946 | 2.763 | -0.225 |
| TSHZ2          | 0.079  | 1.056 | 5.580 | 0.329  |
| TSHZ3          | 0.400  | 1.319 | 4.671 | 1.622  |
| TSKU           | -0.122 | 0.919 | 3.432 | -0.452 |
| TSPAN11        | -0.434 | 0.740 | 3.090 | -1.687 |
| TSPAN13        | 1.216  | 2.323 | 6.738 | 2.171  |
| TSPAN14        | 0.546  | 1.460 | 3.467 | 1.839  |
| TSPAN15        | -0.851 | 0.555 | 5.590 | -2.062 |
| TSPAN17        | 0.266  | 1.202 | 4.952 | 1.104  |
| TSPAN18        | -0.280 | 0.824 | 3.825 | -0.937 |
| TSPAN2         | 0.504  | 1.418 | 4.014 | 1.476  |
| TSPAN33        | -0.183 | 0.881 | 6.137 | -0.875 |
| TSPAN5         | 0.292  | 1.224 | 5.187 | 1.330  |
| TSPAN6         | -0.082 | 0.945 | 5.306 | -0.358 |

|                      |        |       |       |        |
|----------------------|--------|-------|-------|--------|
| TSPAN7//RP5-972B16.2 | 0.634  | 1.552 | 6.882 | 2.088  |
| TSPAN8               | -0.980 | 0.507 | 3.008 | -2.537 |
| TSPAN9               | 0.589  | 1.505 | 4.154 | 2.955  |
| TSPO                 | -0.351 | 0.784 | 3.841 | -1.299 |
| TSPY26P              | 0.054  | 1.038 | 3.762 | 0.218  |
| TSPYL1               | 0.825  | 1.771 | 7.123 | 2.477  |
| TSPYL2               | 0.622  | 1.539 | 7.385 | 2.409  |
| TSPYL4               | 0.273  | 1.209 | 7.694 | 1.144  |
| TSPYL5               | 0.290  | 1.223 | 4.842 | 1.295  |
| TSSC1-IT1            | 0.037  | 1.026 | 2.621 | 0.132  |
| TSSK3                | -0.441 | 0.737 | 3.212 | -1.243 |
| TST                  | -0.703 | 0.614 | 5.957 | -2.167 |
| TSTD1                | 0.639  | 1.557 | 3.495 | 1.876  |
| TTBK1                | 0.279  | 1.213 | 5.341 | 1.216  |
| TTBK2                | 0.410  | 1.328 | 7.421 | 1.833  |
| TTC18                | -0.346 | 0.787 | 4.502 | -1.146 |
| TTC19                | 0.491  | 1.405 | 6.035 | 2.345  |
| TTC21B//LOC100506124 | 0.127  | 1.092 | 6.001 | 0.646  |
| TTC21B//LOC100506124 | 0.067  | 1.048 | 3.316 | 0.270  |
| TTC25                | 0.005  | 1.003 | 3.387 | 0.017  |
| TTC26                | 0.101  | 1.073 | 3.685 | 0.392  |
| TTC30B               | -0.090 | 0.939 | 2.429 | -0.327 |
| TTC33                | 0.702  | 1.627 | 5.784 | 2.983  |
| TTC34                | 0.127  | 1.092 | 2.653 | 0.515  |
| TTC38                | -0.230 | 0.853 | 5.009 | -0.883 |
| TTC39A               | 0.337  | 1.263 | 2.952 | 1.159  |
| TTC39B               | 0.399  | 1.319 | 4.748 | 1.230  |
| TTC39C               | 0.829  | 1.776 | 4.971 | 3.002  |
| TTC3P1               | -0.019 | 0.987 | 5.066 | -0.070 |
| TTC40                | -0.023 | 0.984 | 2.616 | -0.093 |
| TTC5                 | 0.428  | 1.346 | 3.510 | 1.912  |
| TTC7A                | -0.378 | 0.769 | 5.278 | -1.374 |
| TTC7B                | 0.453  | 1.369 | 6.044 | 2.114  |
| TTC9                 | 1.080  | 2.115 | 5.444 | 1.862  |
| TTC9B                | 1.251  | 2.379 | 3.141 | 3.017  |
| TTF1                 | 0.138  | 1.100 | 4.949 | 0.589  |
| TTF2                 | -0.295 | 0.815 | 3.457 | -0.923 |
| TTLL4                | -0.670 | 0.629 | 5.910 | -2.485 |
| TTLL7                | -0.236 | 0.849 | 7.527 | -0.943 |
| TTLL7-IT1            | -0.898 | 0.537 | 4.598 | -2.341 |
| TTLL9                | -1.138 | 0.455 | 4.437 | -3.677 |
| TTN                  | -0.936 | 0.523 | 4.153 | -1.672 |
| TTN-AS1              | 0.041  | 1.029 | 4.620 | 0.136  |
| TTPA                 | -0.557 | 0.680 | 3.569 | -1.384 |
| TTPAL                | 0.189  | 1.140 | 4.630 | 0.839  |
| TTR                  | 0.709  | 1.635 | 3.506 | 1.487  |
| TTY10                | -0.536 | 0.690 | 2.997 | -1.160 |
| TTY15                | -0.052 | 0.965 | 4.857 | -0.045 |
| TTYH1                | -0.296 | 0.815 | 5.683 | -1.298 |
| TTYH2                | -1.059 | 0.480 | 7.825 | -2.714 |

|                         |        |       |       |        |
|-------------------------|--------|-------|-------|--------|
| TUB                     | 0.213  | 1.159 | 6.769 | 0.800  |
| TUBA3C//TUBA3D          | 0.395  | 1.315 | 2.381 | 1.425  |
| TUBA3FP                 | -0.430 | 0.742 | 2.419 | -1.346 |
| TUBA4B                  | -0.151 | 0.901 | 2.461 | -0.466 |
| TUBA8                   | 0.854  | 1.807 | 3.371 | 2.256  |
| TUBB1                   | -0.294 | 0.816 | 2.466 | -0.637 |
| TUBB2A                  | 0.119  | 1.086 | 7.602 | 0.463  |
| TUBB2B                  | -0.116 | 0.922 | 4.925 | -0.402 |
| TUBB6                   | 0.105  | 1.075 | 4.733 | 0.323  |
| TUBGCP4                 | 0.329  | 1.257 | 6.621 | 1.344  |
| TUNAR//LINC00617        | 0.818  | 1.763 | 3.731 | 2.310  |
| TUSC2                   | 0.262  | 1.199 | 4.624 | 1.193  |
| TUSC3                   | 0.946  | 1.927 | 5.790 | 2.618  |
| TVP23A                  | 0.293  | 1.225 | 3.794 | 1.065  |
| TXLNB                   | -0.308 | 0.808 | 4.199 | -0.974 |
| TXLNGY//TXLNG2P         | 0.108  | 1.078 | 4.067 | 0.109  |
| TXLNGY//TXLNG2P         | 0.077  | 1.055 | 3.987 | 0.083  |
| TXNDC16                 | 0.225  | 1.168 | 5.371 | 1.016  |
| TXNIP                   | -0.996 | 0.501 | 8.580 | -2.601 |
| TYK2                    | -0.256 | 0.837 | 4.675 | -1.074 |
| TYMP//SCO2              | -0.045 | 0.969 | 4.439 | -0.216 |
| TYMS                    | -0.621 | 0.650 | 3.644 | -1.351 |
| TYROBP                  | -0.417 | 0.749 | 8.375 | -0.978 |
| TYRP1                   | 0.181  | 1.134 | 2.630 | 0.599  |
| TYW3                    | 0.278  | 1.212 | 4.378 | 1.397  |
| U91328.19               | 0.155  | 1.113 | 2.438 | 0.702  |
| UACA                    | -0.505 | 0.705 | 5.261 | -1.726 |
| UAP1                    | 0.471  | 1.386 | 5.823 | 1.584  |
| UAP1L1                  | -0.433 | 0.741 | 4.568 | -1.637 |
| UBA7//MIR5193           | -0.395 | 0.760 | 4.516 | -1.118 |
| UBALD1                  | 0.319  | 1.248 | 5.369 | 1.311  |
| UBALD2                  | -0.188 | 0.878 | 6.088 | -0.684 |
| UBC                     | -0.357 | 0.781 | 6.758 | -1.173 |
| UBE2E2                  | 0.165  | 1.121 | 5.648 | 0.796  |
| UBE2MP1                 | 0.359  | 1.282 | 6.058 | 1.509  |
| UBE2O                   | 0.437  | 1.354 | 6.329 | 1.727  |
| UBE2Q2L//RP11-182J1.16  | -0.077 | 0.948 | 2.845 | -0.220 |
| UBE2QL1                 | 1.114  | 2.164 | 5.480 | 2.035  |
| UBE2T                   | 0.748  | 1.679 | 4.035 | 1.983  |
| UBE2W//RP11-463D19.2    | 0.484  | 1.399 | 4.285 | 2.206  |
| UBL7-AS1                | -0.492 | 0.711 | 2.497 | -1.541 |
| UBLCP1                  | 0.198  | 1.147 | 6.870 | 0.890  |
| UBP1                    | 0.276  | 1.211 | 3.496 | 1.289  |
| UBQLN2                  | 0.203  | 1.151 | 7.618 | 1.003  |
| UBR3                    | 0.321  | 1.249 | 7.444 | 1.608  |
| UBTD1                   | -0.242 | 0.845 | 4.246 | -1.048 |
| UBXN10                  | 0.167  | 1.123 | 4.637 | 0.536  |
| UBXN10-AS1//RP3-340N1.5 | -0.049 | 0.966 | 3.081 | -0.177 |
| UBXN2B                  | 0.432  | 1.349 | 5.152 | 1.488  |
| UCHL1                   | 0.434  | 1.351 | 7.102 | 1.675  |

|                                    |        |       |       |        |
|------------------------------------|--------|-------|-------|--------|
| UCHL5                              | 0.263  | 1.200 | 5.069 | 1.296  |
| UCN                                | -0.195 | 0.873 | 3.490 | -0.752 |
| UCP2                               | -0.687 | 0.621 | 3.662 | -1.765 |
| UG0898H09                          | -0.070 | 0.953 | 6.257 | -0.241 |
| UGCG                               | 0.509  | 1.423 | 6.060 | 1.884  |
| UGDH-AS1                           | -0.787 | 0.579 | 3.416 | -2.440 |
| UGP2                               | 0.438  | 1.355 | 4.159 | 2.075  |
| UGT8                               | -1.225 | 0.428 | 9.349 | -2.717 |
| UHRF1BP1L                          | 0.483  | 1.397 | 6.404 | 1.974  |
| ULK1                               | 0.383  | 1.304 | 5.047 | 1.663  |
| ULK4                               | 0.038  | 1.027 | 3.782 | 0.140  |
| ULK4P1//RP13-395E19.3//ULK4P3//ULK | -0.454 | 0.730 | 5.372 | -1.538 |
| ULK4P3                             | 0.062  | 1.044 | 3.037 | 0.179  |
| ULK4P3//ULK4P1//RP13-395E19.3//CHR | -0.450 | 0.732 | 5.583 | -1.468 |
| UNC13A                             | 1.466  | 2.763 | 6.083 | 2.446  |
| UNC13C                             | 1.654  | 3.146 | 6.023 | 2.683  |
| UNC13D                             | -0.698 | 0.617 | 3.982 | -2.262 |
| UNC5A                              | 1.363  | 2.571 | 3.924 | 2.669  |
| UNC5B                              | -0.903 | 0.535 | 6.311 | -3.125 |
| UNC5C                              | -0.594 | 0.663 | 5.563 | -2.231 |
| UNC5CL//RP1-34B21.5                | -0.083 | 0.944 | 2.589 | -0.301 |
| UNC5D                              | 1.095  | 2.136 | 4.758 | 2.130  |
| UNC79                              | 0.616  | 1.532 | 5.864 | 1.873  |
| UNC80                              | 0.956  | 1.940 | 6.503 | 2.155  |
| UNC93B1                            | -0.294 | 0.816 | 4.053 | -1.166 |
| UNC93B3//UNC93B1//UNC93B7//UNC9    | -0.073 | 0.950 | 4.223 | -0.311 |
| UPF2                               | 0.425  | 1.343 | 5.921 | 1.757  |
| UPP2                               | 0.476  | 1.391 | 3.478 | 1.639  |
| UPRT                               | 0.222  | 1.166 | 3.775 | 0.957  |
| UQCRB                              | 0.343  | 1.269 | 3.832 | 1.499  |
| UQCRC2                             | 0.363  | 1.286 | 8.615 | 2.013  |
| UQCRFS1                            | 0.385  | 1.306 | 4.660 | 1.517  |
| UQCRH//UQCRHL                      | 0.333  | 1.259 | 4.050 | 1.542  |
| UQCRHL//RP11-169K16.7              | 0.322  | 1.250 | 6.254 | 1.202  |
| USH1C                              | -1.054 | 0.482 | 3.477 | -2.870 |
| USP11                              | 0.496  | 1.410 | 7.602 | 2.325  |
| USP17L15//USP17L6P//USP17L9P//USP: | 0.181  | 1.133 | 4.568 | 0.650  |
| USP17L15//USP17L6P//USP17L9P//USP: | 0.225  | 1.169 | 4.602 | 0.800  |
| USP17L15//USP17L6P//USP17L9P//USP: | 0.122  | 1.088 | 4.435 | 0.434  |
| USP17L5                            | 0.442  | 1.359 | 4.290 | 1.438  |
| USP25                              | 0.596  | 1.512 | 6.672 | 2.815  |
| USP27X                             | 0.489  | 1.403 | 3.713 | 1.428  |
| USP28                              | 0.123  | 1.089 | 4.674 | 0.496  |
| USP32                              | -0.045 | 0.969 | 7.579 | -0.229 |
| USP32P2                            | 0.736  | 1.666 | 3.661 | 1.942  |
| USP33                              | 0.269  | 1.205 | 6.136 | 1.471  |
| USP40                              | -0.508 | 0.703 | 5.400 | -1.958 |
| USP43                              | 0.497  | 1.411 | 3.126 | 1.602  |
| USP53                              | -0.191 | 0.876 | 6.652 | -0.787 |
| USP54                              | -0.970 | 0.510 | 7.779 | -3.228 |

|                      |        |       |       |        |
|----------------------|--------|-------|-------|--------|
| USP9Y                | 0.158  | 1.116 | 5.172 | 0.135  |
| UTP14A               | -0.105 | 0.930 | 3.235 | -0.406 |
| UTP23                | 0.057  | 1.040 | 5.378 | 0.255  |
| UTRN                 | -0.355 | 0.782 | 6.937 | -1.474 |
| UTS2                 | -0.381 | 0.768 | 2.285 | -0.818 |
| UTY                  | -0.146 | 0.904 | 3.510 | -0.141 |
| VAC14-AS1            | -0.190 | 0.876 | 4.115 | -0.620 |
| VAMP1                | 0.124  | 1.090 | 7.972 | 0.335  |
| VAMP2//RP11-599B13.6 | 0.332  | 1.259 | 7.771 | 1.668  |
| VAMP3                | -0.534 | 0.691 | 7.659 | -1.907 |
| VAMP4                | 0.400  | 1.319 | 6.450 | 1.552  |
| VAMP5                | -0.262 | 0.834 | 5.275 | -1.153 |
| VAMP8                | -0.547 | 0.684 | 4.699 | -1.531 |
| VANGL2               | -0.578 | 0.670 | 4.877 | -2.327 |
| VASH1                | -0.676 | 0.626 | 5.492 | -2.689 |
| VASP                 | -0.545 | 0.686 | 5.666 | -2.257 |
| VAT1                 | -0.527 | 0.694 | 6.576 | -2.154 |
| VAT1L                | -0.058 | 0.961 | 7.969 | -0.145 |
| VAV1                 | -0.608 | 0.656 | 4.883 | -1.816 |
| VAV3                 | 0.353  | 1.277 | 2.509 | 1.493  |
| VAX1                 | -0.281 | 0.823 | 2.393 | -0.950 |
| VCAM1                | -0.182 | 0.881 | 5.033 | -0.471 |
| VCAN                 | -0.918 | 0.529 | 6.898 | -2.740 |
| VCAN-AS1             | -0.250 | 0.841 | 1.877 | -0.869 |
| VCL                  | 0.197  | 1.146 | 6.110 | 0.681  |
| VCP1P1               | 0.302  | 1.233 | 6.558 | 1.362  |
| VCPKMT//METTL21D     | 0.218  | 1.163 | 4.022 | 0.954  |
| VCX2//VCX            | 0.216  | 1.162 | 3.470 | 0.695  |
| VDAC3                | 0.274  | 1.209 | 8.659 | 1.354  |
| VEGFA                | -0.473 | 0.721 | 5.518 | -0.883 |
| VEGFC                | 0.016  | 1.011 | 3.252 | 0.062  |
| VEZF1                | -0.738 | 0.600 | 6.217 | -3.208 |
| VGFB                 | 0.260  | 1.198 | 4.633 | 0.667  |
| VGLL3                | -0.415 | 0.750 | 2.993 | -1.576 |
| VIM                  | 0.206  | 1.154 | 6.136 | 0.888  |
| VIM-AS1              | -0.030 | 0.980 | 5.032 | -0.094 |
| VIP                  | 0.750  | 1.682 | 3.672 | 1.703  |
| VIPR1                | 1.100  | 2.143 | 3.709 | 2.594  |
| VMAC                 | -0.655 | 0.635 | 4.601 | -2.259 |
| VMO1                 | -0.024 | 0.983 | 2.623 | -0.103 |
| VN1R1                | 0.076  | 1.054 | 4.111 | 0.392  |
| VNN1                 | -0.332 | 0.795 | 2.409 | -0.701 |
| VNN2                 | 0.104  | 1.074 | 2.516 | 0.233  |
| VPS11                | 0.230  | 1.173 | 5.916 | 0.946  |
| VPS13A               | 0.776  | 1.712 | 6.139 | 2.950  |
| VPS33A//RP11-512M8.5 | 0.228  | 1.172 | 4.260 | 0.987  |
| VPS33B               | 0.446  | 1.363 | 5.364 | 1.973  |
| VPS35                | 0.299  | 1.230 | 8.852 | 1.488  |
| VPS36                | 0.365  | 1.288 | 6.224 | 1.594  |
| VPS37D               | -0.098 | 0.934 | 2.753 | -0.329 |

|                                  |        |       |       |        |
|----------------------------------|--------|-------|-------|--------|
| VRK1                             | 0.258  | 1.196 | 3.446 | 1.156  |
| VRK2                             | -0.980 | 0.507 | 4.186 | -2.616 |
| VSIG1                            | 0.509  | 1.423 | 2.578 | 1.669  |
| VSIG4                            | -0.451 | 0.731 | 6.044 | -0.782 |
| VSNL1                            | 1.045  | 2.064 | 2.481 | 2.116  |
| VSTM2A                           | 1.607  | 3.047 | 5.823 | 2.165  |
| VSTM2A-OT1//GS1-18A18.1          | 1.699  | 3.247 | 3.198 | 2.877  |
| VSTM2B                           | 0.175  | 1.129 | 6.069 | 0.801  |
| VSTM2L                           | 1.038  | 2.054 | 4.765 | 2.184  |
| VSTM5                            | 0.291  | 1.223 | 2.711 | 1.099  |
| VSX1                             | -0.335 | 0.793 | 2.851 | -1.296 |
| VTA1                             | 0.291  | 1.224 | 6.956 | 1.379  |
| VTRNA1-1                         | -0.384 | 0.766 | 5.430 | -0.725 |
| VTRNA1-2                         | 0.035  | 1.024 | 2.010 | 0.117  |
| VTRNA1-3                         | -0.256 | 0.838 | 3.889 | -0.607 |
| VTRNA2-1                         | -0.763 | 0.589 | 4.591 | -1.527 |
| VWA1                             | -0.492 | 0.711 | 5.171 | -1.415 |
| VWA3A                            | 0.589  | 1.504 | 4.222 | 1.574  |
| VWA5A                            | -0.162 | 0.894 | 5.507 | -0.560 |
| VWA5B1                           | -0.338 | 0.791 | 1.943 | -1.168 |
| VWA5B2                           | 0.555  | 1.469 | 3.393 | 1.713  |
| VWA7                             | 0.324  | 1.252 | 3.055 | 1.104  |
| VWA7                             | 0.263  | 1.200 | 3.355 | 0.884  |
| VWC2                             | 0.810  | 1.753 | 4.732 | 2.481  |
| VWC2L                            | 0.852  | 1.805 | 3.635 | 1.913  |
| VWF                              | -0.007 | 0.995 | 5.970 | -0.025 |
| WAC-AS1                          | 0.155  | 1.113 | 4.917 | 0.746  |
| WAS                              | -0.464 | 0.725 | 4.799 | -1.573 |
| WASF1                            | 0.889  | 1.852 | 6.429 | 2.933  |
| WASF2                            | -0.625 | 0.648 | 8.447 | -2.488 |
| WASH3P                           | -0.084 | 0.943 | 3.081 | -0.337 |
| WASH3P//ABC7-42389800N19.1//WASH | -0.157 | 0.897 | 5.681 | -0.428 |
| WASH5P                           | -0.381 | 0.768 | 5.572 | -1.522 |
| WASL                             | 0.381  | 1.302 | 7.659 | 1.645  |
| WBP11P1                          | 0.650  | 1.569 | 2.119 | 2.699  |
| WBP1L                            | -0.123 | 0.918 | 7.468 | -0.675 |
| WBP2NL                           | 0.105  | 1.076 | 2.855 | 0.346  |
| WBP5                             | -0.318 | 0.802 | 6.357 | -1.546 |
| WBSCR17                          | 1.610  | 3.053 | 5.236 | 2.718  |
| WDFY2                            | -0.734 | 0.601 | 6.696 | -2.921 |
| WDFY3-AS1                        | -0.349 | 0.785 | 5.013 | -1.488 |
| WDFY4                            | -0.647 | 0.639 | 3.307 | -2.267 |
| WDHD1                            | 0.315  | 1.244 | 3.657 | 1.073  |
| WDR11                            | -0.295 | 0.815 | 6.681 | -1.084 |
| WDR11-AS1                        | -0.291 | 0.817 | 3.731 | -0.894 |
| WDR16                            | 0.200  | 1.149 | 3.971 | 0.411  |
| WDR17                            | 0.901  | 1.867 | 6.436 | 2.612  |
| WDR19                            | 0.284  | 1.217 | 6.075 | 1.286  |
| WDR3                             | 0.360  | 1.283 | 5.776 | 1.629  |
| WDR36                            | 0.158  | 1.116 | 6.460 | 0.712  |



|                       |        |       |       |        |
|-----------------------|--------|-------|-------|--------|
| WDR37                 | 0.505  | 1.419 | 6.253 | 2.201  |
| WDR38                 | -0.877 | 0.545 | 2.822 | -2.247 |
| WDR47                 | 0.483  | 1.398 | 7.450 | 1.752  |
| WDR49                 | -1.046 | 0.484 | 6.582 | -2.758 |
| WDR52                 | -0.144 | 0.905 | 4.419 | -0.587 |
| WDR54                 | 0.605  | 1.521 | 4.049 | 2.676  |
| WDR5B                 | -0.626 | 0.648 | 4.481 | -2.168 |
| WDR63                 | 0.217  | 1.162 | 3.021 | 0.450  |
| WDR65                 | -0.253 | 0.839 | 2.291 | -0.877 |
| WDR7                  | 0.389  | 1.310 | 7.554 | 2.004  |
| WDR86-AS1             | 0.061  | 1.043 | 2.936 | 0.234  |
| WDR92//RP11-474G23.1  | 0.075  | 1.053 | 4.742 | 0.326  |
| WDR96                 | -0.265 | 0.832 | 3.877 | -0.496 |
| WEE1                  | -0.164 | 0.893 | 3.012 | -0.818 |
| WFDC1                 | 0.748  | 1.680 | 4.368 | 2.393  |
| WHAMMP1               | -0.577 | 0.670 | 4.366 | -1.641 |
| WIF1                  | 1.726  | 3.308 | 4.038 | 2.826  |
| WIPF1                 | -0.752 | 0.594 | 4.684 | -2.000 |
| WIPF2                 | 0.185  | 1.137 | 6.072 | 0.903  |
| WIPF3                 | 1.185  | 2.274 | 4.693 | 2.746  |
| WIP11                 | -0.250 | 0.841 | 6.531 | -1.075 |
| WISP1                 | -0.251 | 0.840 | 2.432 | -0.992 |
| WLS                   | -0.029 | 0.980 | 6.558 | -0.133 |
| WNK1                  | -0.461 | 0.726 | 8.467 | -2.151 |
| WNK2                  | 0.529  | 1.443 | 5.425 | 1.585  |
| WNK3                  | -0.038 | 0.974 | 4.407 | -0.155 |
| WNT10B                | 0.843  | 1.794 | 3.501 | 2.584  |
| WNT3//LOC101929777    | 0.476  | 1.391 | 3.763 | 1.394  |
| WNT5A-AS1             | -0.037 | 0.975 | 3.317 | -0.192 |
| WNT7A                 | -0.217 | 0.860 | 3.811 | -0.677 |
| WNT9A                 | 0.045  | 1.031 | 3.057 | 0.152  |
| WSB1                  | -0.682 | 0.623 | 8.719 | -2.190 |
| WSCD1//LOC339166      | -0.704 | 0.614 | 5.455 | -3.061 |
| WSCD2                 | 0.640  | 1.558 | 2.893 | 2.092  |
| WWC1                  | -0.038 | 0.974 | 5.839 | -0.200 |
| WWTR1                 | -0.202 | 0.869 | 4.472 | -0.860 |
| XAF1                  | 0.189  | 1.140 | 6.405 | 0.596  |
| XBP1                  | 0.073  | 1.052 | 6.243 | 0.296  |
| XG//XGY2              | -0.232 | 0.851 | 2.394 | -0.859 |
| XGY2//XG//SRY//RPS4Y1 | -0.512 | 0.701 | 2.583 | -1.587 |
| XIST                  | 0.142  | 1.103 | 3.852 | 0.070  |
| XK                    | 0.938  | 1.915 | 4.460 | 3.138  |
| XKR4                  | 1.202  | 2.300 | 4.083 | 2.796  |
| XKR4                  | 0.709  | 1.635 | 5.149 | 1.785  |
| XKR6                  | 0.320  | 1.249 | 3.873 | 1.284  |
| XKR6//AF131215.2      | 0.215  | 1.161 | 3.295 | 0.692  |
| XKR7                  | 0.441  | 1.357 | 2.291 | 1.530  |
| XKR8                  | -0.219 | 0.859 | 2.838 | -0.967 |
| XKR9                  | 0.558  | 1.473 | 2.894 | 2.059  |
| XPC                   | -0.431 | 0.742 | 5.895 | -1.638 |

|                                   |        |       |       |        |
|-----------------------------------|--------|-------|-------|--------|
| XPR1                              | 0.261  | 1.198 | 7.494 | 1.286  |
| XRCC4                             | -0.022 | 0.985 | 4.457 | -0.080 |
| XRCC6BP1                          | 0.654  | 1.573 | 2.837 | 2.401  |
| XRRA1                             | -0.426 | 0.744 | 4.838 | -1.590 |
| XXbac-B476C20.13                  | -0.168 | 0.890 | 4.147 | -0.664 |
| XXbac-B476C20.14                  | -0.464 | 0.725 | 2.503 | -1.883 |
| XXbac-BPG116M5.15                 | 0.141  | 1.103 | 4.202 | 0.337  |
| XXbac-BPG116M5.17//C2//CFB        | -0.069 | 0.953 | 3.907 | -0.232 |
| XXbac-BPG154L12.4                 | 0.289  | 1.222 | 3.434 | 1.006  |
| XXbac-BPG55C20.7                  | -0.974 | 0.509 | 2.353 | -3.678 |
| YAP1                              | -0.012 | 0.992 | 5.306 | -0.059 |
| YARS2                             | 0.191  | 1.141 | 4.766 | 0.916  |
| YBX1                              | -0.512 | 0.701 | 8.285 | -2.322 |
| YBX3                              | 0.535  | 1.449 | 4.962 | 1.543  |
| YBX3P1//CSDAP1                    | 0.404  | 1.324 | 2.479 | 1.323  |
| YEATS4                            | 0.132  | 1.096 | 4.993 | 0.501  |
| YIF1A                             | -0.197 | 0.872 | 4.914 | -0.905 |
| YIPF4                             | -0.067 | 0.955 | 6.677 | -0.305 |
| YIPF5                             | 0.134  | 1.097 | 7.430 | 0.639  |
| YJEFN3//CTC-260F20.3              | 0.379  | 1.301 | 4.113 | 1.294  |
| YME1L1                            | 0.210  | 1.157 | 3.827 | 0.852  |
| YME1L1//TRAJ17//TRAV20//TRAC//TRD | -0.526 | 0.695 | 3.614 | -1.354 |
| YME1L1//TRAV12-2                  | -0.258 | 0.836 | 3.253 | -0.974 |
| YOD1                              | 0.035  | 1.024 | 4.039 | 0.093  |
| YPEL1                             | 0.459  | 1.375 | 3.708 | 1.543  |
| YPEL3                             | 0.075  | 1.054 | 7.615 | 0.337  |
| YPEL4                             | 0.470  | 1.385 | 3.892 | 1.803  |
| YTHDF1                            | 0.217  | 1.163 | 6.893 | 0.961  |
| YWHAB                             | 0.321  | 1.250 | 6.829 | 1.589  |
| YWHAG                             | 0.582  | 1.497 | 9.525 | 1.862  |
| YWHAH                             | 0.474  | 1.389 | 4.644 | 1.827  |
| YY2                               | -0.182 | 0.881 | 3.143 | -0.601 |
| ZADH2                             | 0.094  | 1.068 | 5.793 | 0.423  |
| ZAK//AC013461.1                   | -0.034 | 0.977 | 5.264 | -0.130 |
| ZBBX                              | 1.724  | 3.304 | 3.249 | 2.632  |
| ZBED8//C5orf54                    | -0.492 | 0.711 | 3.918 | -2.314 |
| ZBED9//SCAND3                     | 1.022  | 2.031 | 2.975 | 2.246  |
| ZBTB12                            | -0.609 | 0.656 | 3.156 | -2.502 |
| ZBTB16                            | -0.557 | 0.680 | 3.406 | -1.281 |
| ZBTB16                            | 0.111  | 1.080 | 5.897 | 0.323  |
| ZBTB18                            | 0.651  | 1.570 | 6.038 | 2.616  |
| ZBTB20                            | -0.800 | 0.574 | 6.414 | -2.750 |
| ZBTB20//MIR568                    | 0.198  | 1.147 | 3.820 | 0.448  |
| ZBTB24                            | 0.036  | 1.025 | 5.650 | 0.160  |
| ZBTB33                            | 0.480  | 1.395 | 4.921 | 2.341  |
| ZBTB37                            | -0.618 | 0.652 | 5.823 | -2.353 |
| ZBTB39                            | -0.176 | 0.885 | 4.521 | -0.684 |
| ZBTB40-IT1                        | -0.251 | 0.840 | 3.675 | -0.776 |
| ZBTB44                            | 0.023  | 1.016 | 6.969 | 0.119  |
| ZBTB6                             | 0.306  | 1.237 | 5.132 | 1.406  |

|                    |        |       |       |        |
|--------------------|--------|-------|-------|--------|
| ZBTB7B             | -0.586 | 0.666 | 4.765 | -2.354 |
| ZBTB7C             | 0.129  | 1.094 | 3.983 | 0.500  |
| ZBTB8A//RP1-27O5.3 | 0.318  | 1.246 | 3.740 | 1.302  |
| ZC2HC1A            | 0.411  | 1.330 | 6.509 | 1.733  |
| ZC3H12A//MIR6732   | -0.208 | 0.866 | 3.934 | -0.909 |
| ZC3H12B            | 0.550  | 1.465 | 5.248 | 2.076  |
| ZC3H8              | 0.058  | 1.041 | 4.956 | 0.199  |
| ZC3HAV1            | -0.404 | 0.756 | 6.638 | -1.451 |
| ZCCHC12            | 0.229  | 1.172 | 4.470 | 0.389  |
| ZCCHC24            | -0.633 | 0.645 | 6.897 | -2.376 |
| ZCWPW1             | -0.216 | 0.861 | 4.354 | -0.920 |
| ZDBF2              | 0.640  | 1.558 | 6.157 | 2.185  |
| ZDHHC11            | -0.773 | 0.585 | 3.772 | -2.309 |
| ZDHHC12            | -0.246 | 0.843 | 3.718 | -0.929 |
| ZDHHC13            | 0.188  | 1.139 | 4.491 | 0.685  |
| ZDHHC14            | -0.771 | 0.586 | 6.637 | -3.392 |
| ZDHHC20            | -1.087 | 0.471 | 7.162 | -3.280 |
| ZDHHC20-IT1        | -0.762 | 0.590 | 4.022 | -1.844 |
| ZDHHC21            | 0.517  | 1.431 | 6.600 | 2.062  |
| ZDHHC22            | 0.580  | 1.495 | 3.962 | 2.196  |
| ZDHHC23            | 0.989  | 1.985 | 3.406 | 2.211  |
| ZDHHC8P1           | 0.402  | 1.322 | 2.951 | 1.319  |
| ZDHHC9             | -0.694 | 0.618 | 8.342 | -2.456 |
| ZEB2-AS1           | -0.228 | 0.854 | 2.680 | -0.891 |
| ZER1               | 0.403  | 1.322 | 7.289 | 1.978  |
| ZFAND1             | 0.394  | 1.314 | 5.138 | 1.826  |
| ZFAS1              | -0.271 | 0.829 | 7.020 | -1.420 |
| ZFHX3              | -0.409 | 0.753 | 5.541 | -1.617 |
| ZFP1               | 0.236  | 1.178 | 6.019 | 0.939  |
| ZFP14              | -0.256 | 0.838 | 4.207 | -0.918 |
| ZFP28              | 0.018  | 1.012 | 4.165 | 0.078  |
| ZFP36              | 0.811  | 1.754 | 7.914 | 1.801  |
| ZFP36L1            | -0.405 | 0.755 | 4.540 | -1.717 |
| ZFP36L2            | 0.103  | 1.074 | 6.473 | 0.286  |
| ZFP69B             | 1.057  | 2.080 | 4.288 | 2.699  |
| ZFP82              | 0.168  | 1.123 | 4.940 | 0.707  |
| ZFP90              | 0.516  | 1.430 | 3.576 | 1.953  |
| ZFP92              | 0.731  | 1.660 | 3.087 | 2.404  |
| ZFY                | 0.261  | 1.198 | 2.779 | 0.583  |
| ZFYVE16            | -0.530 | 0.692 | 7.030 | -1.564 |
| ZFYVE28            | 0.333  | 1.259 | 2.889 | 1.178  |
| ZFYVE28            | 0.323  | 1.251 | 3.184 | 1.076  |
| ZFYVE9             | 0.529  | 1.443 | 6.738 | 2.240  |
| ZHX2               | -0.547 | 0.684 | 5.691 | -1.868 |
| ZIC1               | 0.503  | 1.417 | 5.310 | 1.648  |
| ZIC2               | 0.140  | 1.102 | 3.888 | 0.523  |
| ZIC5               | 0.418  | 1.336 | 4.724 | 1.531  |
| ZIK1               | 0.273  | 1.208 | 3.822 | 1.165  |
| ZKSCAN2            | 0.019  | 1.013 | 4.897 | 0.091  |
| ZKSCAN3            | 0.155  | 1.113 | 4.132 | 0.493  |

|                              |        |       |       |        |
|------------------------------|--------|-------|-------|--------|
| ZMAT1                        | -0.575 | 0.671 | 5.760 | -1.482 |
| ZMAT3                        | 0.257  | 1.195 | 7.308 | 1.322  |
| ZMAT4                        | 1.074  | 2.105 | 4.781 | 2.699  |
| ZMYM6NB//ZMYM6//RP11-244H3.4 | -0.094 | 0.937 | 6.006 | -0.351 |
| ZMYND10                      | 0.049  | 1.035 | 2.332 | 0.163  |
| ZMYND15                      | -0.238 | 0.848 | 2.885 | -1.079 |
| ZMYND8                       | -0.135 | 0.911 | 6.423 | -0.680 |
| ZNF100                       | 0.220  | 1.164 | 5.212 | 0.777  |
| ZNF114                       | 0.347  | 1.272 | 4.115 | 1.192  |
| ZNF117                       | -0.463 | 0.725 | 4.634 | -1.716 |
| ZNF132                       | -0.169 | 0.889 | 3.636 | -0.719 |
| ZNF134                       | 0.249  | 1.188 | 5.502 | 1.177  |
| ZNF138                       | -0.356 | 0.781 | 6.107 | -1.528 |
| ZNF14                        | -0.025 | 0.983 | 4.109 | -0.096 |
| ZNF140                       | 0.599  | 1.514 | 3.220 | 1.881  |
| ZNF154                       | 0.343  | 1.269 | 4.332 | 1.395  |
| ZNF17                        | 0.124  | 1.090 | 4.481 | 0.477  |
| ZNF184                       | 0.514  | 1.428 | 5.379 | 1.710  |
| ZNF185                       | 0.219  | 1.164 | 3.386 | 0.867  |
| ZNF189                       | -0.120 | 0.921 | 5.645 | -0.521 |
| ZNF192P1                     | -0.098 | 0.935 | 4.067 | -0.294 |
| ZNF200                       | 0.115  | 1.083 | 3.336 | 0.502  |
| ZNF204P                      | 1.059  | 2.083 | 2.807 | 2.407  |
| ZNF208                       | -0.474 | 0.720 | 2.626 | -1.011 |
| ZNF215                       | 0.560  | 1.474 | 1.921 | 1.930  |
| ZNF217                       | -0.038 | 0.974 | 3.962 | -0.160 |
| ZNF22                        | -0.210 | 0.865 | 3.405 | -0.785 |
| ZNF223                       | 0.361  | 1.284 | 3.776 | 1.346  |
| ZNF224                       | -0.194 | 0.874 | 4.027 | -0.652 |
| ZNF225                       | 0.080  | 1.057 | 3.429 | 0.340  |
| ZNF227                       | -0.060 | 0.959 | 5.154 | -0.240 |
| ZNF229//CTC-512J12.4//ZFP28  | -0.120 | 0.920 | 4.351 | -0.407 |
| ZNF23//AC010547.9            | 0.167  | 1.123 | 4.005 | 0.637  |
| ZNF230                       | 0.566  | 1.480 | 3.082 | 1.675  |
| ZNF232                       | 0.202  | 1.150 | 3.146 | 0.639  |
| ZNF233                       | 0.326  | 1.254 | 2.038 | 1.278  |
| ZNF234                       | -0.012 | 0.992 | 4.141 | -0.045 |
| ZNF239                       | 0.049  | 1.034 | 2.946 | 0.168  |
| ZNF248                       | 0.126  | 1.091 | 5.664 | 0.541  |
| ZNF25                        | 0.702  | 1.627 | 7.603 | 2.428  |
| ZNF253                       | -0.067 | 0.955 | 4.593 | -0.263 |
| ZNF256                       | 0.282  | 1.216 | 3.697 | 1.018  |
| ZNF267                       | 0.138  | 1.100 | 4.200 | 0.431  |
| ZNF274                       | -0.095 | 0.936 | 3.335 | -0.417 |
| ZNF276                       | -0.368 | 0.775 | 4.557 | -1.592 |
| ZNF280B                      | 0.358  | 1.282 | 5.011 | 1.157  |
| ZNF280C                      | 0.186  | 1.137 | 5.633 | 0.666  |
| ZNF280D//LOC145783           | -0.638 | 0.643 | 4.920 | -2.250 |
| ZNF280D//LOC145783           | -0.126 | 0.917 | 2.303 | -0.512 |
| ZNF280D//LOC145783           | -0.009 | 0.994 | 2.813 | -0.031 |

|                            |        |       |       |        |
|----------------------------|--------|-------|-------|--------|
| ZNF284//ZNF223//AC084219.2 | 0.061  | 1.043 | 4.028 | 0.171  |
| ZNF285                     | 0.105  | 1.076 | 3.141 | 0.319  |
| ZNF3                       | -0.751 | 0.594 | 3.826 | -3.021 |
| ZNF300                     | 0.005  | 1.003 | 3.013 | 0.018  |
| ZNF302                     | -0.159 | 0.895 | 5.790 | -0.635 |
| ZNF304                     | 0.369  | 1.291 | 4.364 | 1.500  |
| ZNF311                     | -0.187 | 0.878 | 2.232 | -0.682 |
| ZNF320                     | 0.019  | 1.013 | 4.274 | 0.072  |
| ZNF322                     | 0.018  | 1.013 | 4.552 | 0.083  |
| ZNF324B                    | -0.023 | 0.984 | 3.333 | -0.076 |
| ZNF326                     | -0.538 | 0.689 | 6.753 | -2.378 |
| ZNF329                     | 0.289  | 1.222 | 3.874 | 1.291  |
| ZNF33B                     | 0.372  | 1.294 | 3.092 | 1.146  |
| ZNF34                      | -0.342 | 0.789 | 3.728 | -1.399 |
| ZNF346-IT1                 | 0.456  | 1.371 | 2.206 | 1.574  |
| ZNF350                     | 0.142  | 1.103 | 4.051 | 0.573  |
| ZNF350-AS1//HCCAT3         | -0.173 | 0.887 | 3.061 | -0.672 |
| ZNF365                     | 0.310  | 1.240 | 2.640 | 1.471  |
| ZNF37BP                    | 0.355  | 1.279 | 5.663 | 1.616  |
| ZNF382                     | 0.452  | 1.368 | 4.155 | 1.973  |
| ZNF383                     | 0.297  | 1.228 | 4.322 | 1.220  |
| ZNF385A                    | 0.114  | 1.082 | 6.743 | 0.514  |
| ZNF385B                    | 1.531  | 2.889 | 3.479 | 2.809  |
| ZNF385D                    | 0.147  | 1.107 | 2.202 | 0.514  |
| ZNF391                     | 0.196  | 1.145 | 3.594 | 0.665  |
| ZNF395//FBXO16             | -0.063 | 0.957 | 4.250 | -0.237 |
| ZNF404                     | -0.431 | 0.741 | 4.905 | -1.621 |
| ZNF416                     | 0.038  | 1.027 | 2.965 | 0.138  |
| ZNF417                     | -0.167 | 0.891 | 5.032 | -0.701 |
| ZNF418                     | -0.434 | 0.740 | 4.080 | -1.919 |
| ZNF419                     | 0.418  | 1.336 | 3.556 | 1.684  |
| ZNF420                     | -0.146 | 0.904 | 5.280 | -0.736 |
| ZNF429                     | 0.247  | 1.187 | 5.705 | 0.901  |
| ZNF43                      | -0.132 | 0.913 | 4.488 | -0.408 |
| ZNF436                     | 0.266  | 1.203 | 5.518 | 0.933  |
| ZNF440                     | 0.405  | 1.324 | 4.882 | 1.480  |
| ZNF441                     | 0.180  | 1.133 | 4.037 | 0.683  |
| ZNF443                     | 0.216  | 1.161 | 2.573 | 0.624  |
| ZNF449                     | 0.381  | 1.302 | 4.535 | 1.120  |
| ZNF451                     | -0.248 | 0.842 | 5.987 | -1.018 |
| ZNF454                     | 0.341  | 1.267 | 4.762 | 1.386  |
| ZNF461                     | 0.396  | 1.316 | 3.398 | 1.788  |
| ZNF462                     | -0.819 | 0.567 | 6.223 | -3.159 |
| ZNF468                     | 0.169  | 1.124 | 5.111 | 0.575  |
| ZNF48                      | 0.142  | 1.103 | 2.373 | 0.553  |
| ZNF480                     | -0.413 | 0.751 | 4.792 | -1.278 |
| ZNF483                     | 0.438  | 1.355 | 5.707 | 1.694  |
| ZNF486                     | -0.391 | 0.762 | 3.349 | -1.163 |
| ZNF487                     | 0.546  | 1.460 | 4.274 | 1.751  |
| ZNF488                     | -0.634 | 0.644 | 4.244 | -1.815 |

|                                |        |       |       |        |
|--------------------------------|--------|-------|-------|--------|
| ZNF502                         | -0.535 | 0.690 | 3.353 | -1.620 |
| ZNF503//RP11-399K21.11         | 0.091  | 1.065 | 3.529 | 0.380  |
| ZNF510                         | 0.175  | 1.129 | 5.120 | 0.978  |
| ZNF512//RP11-158I13.2          | 0.060  | 1.043 | 6.380 | 0.290  |
| ZNF518A                        | -0.391 | 0.763 | 5.200 | -1.310 |
| ZNF518B                        | 0.068  | 1.048 | 4.713 | 0.288  |
| ZNF519                         | 0.762  | 1.695 | 4.177 | 2.554  |
| ZNF521                         | -0.614 | 0.653 | 5.548 | -2.539 |
| ZNF527                         | 0.089  | 1.064 | 2.613 | 0.341  |
| ZNF534                         | 0.122  | 1.089 | 2.538 | 0.434  |
| ZNF536                         | -0.927 | 0.526 | 6.515 | -2.402 |
| ZNF542P//ZNF542//LOC283788     | 0.092  | 1.066 | 3.787 | 0.454  |
| ZNF547                         | 0.015  | 1.010 | 4.653 | 0.062  |
| ZNF549                         | -0.063 | 0.957 | 3.702 | -0.202 |
| ZNF554                         | 0.843  | 1.794 | 4.135 | 3.250  |
| ZNF557                         | -0.098 | 0.934 | 4.032 | -0.333 |
| ZNF558                         | 0.315  | 1.244 | 4.270 | 1.306  |
| ZNF563                         | 0.250  | 1.189 | 2.583 | 0.641  |
| ZNF567                         | 0.401  | 1.321 | 3.754 | 1.588  |
| ZNF569                         | -0.251 | 0.840 | 3.911 | -0.977 |
| ZNF571                         | -0.084 | 0.944 | 3.233 | -0.277 |
| ZNF572                         | -0.388 | 0.764 | 2.527 | -1.250 |
| ZNF581                         | -0.213 | 0.863 | 4.161 | -0.654 |
| ZNF582                         | 0.226  | 1.170 | 3.779 | 0.919  |
| ZNF582-AS1//AC006116.25        | 0.134  | 1.097 | 3.235 | 0.640  |
| ZNF584                         | 0.317  | 1.245 | 4.277 | 1.151  |
| ZNF587B                        | -0.163 | 0.893 | 3.728 | -0.625 |
| ZNF594                         | -0.234 | 0.850 | 4.904 | -0.867 |
| ZNF596                         | -0.149 | 0.902 | 2.160 | -0.579 |
| ZNF597                         | -0.037 | 0.974 | 5.270 | -0.168 |
| ZNF607//CTD-2528L19.4          | -0.131 | 0.913 | 4.948 | -0.576 |
| ZNF611                         | 0.178  | 1.131 | 4.079 | 0.762  |
| ZNF613                         | 0.343  | 1.269 | 3.744 | 1.131  |
| ZNF615                         | 0.251  | 1.190 | 4.267 | 1.033  |
| ZNF616                         | 0.180  | 1.133 | 2.603 | 0.621  |
| ZNF624                         | 0.013  | 1.009 | 3.879 | 0.052  |
| ZNF626                         | 0.322  | 1.250 | 3.852 | 1.383  |
| ZNF638//ZNF638-IT1             | -0.111 | 0.926 | 4.671 | -0.287 |
| ZNF649                         | -0.368 | 0.775 | 4.599 | -1.397 |
| ZNF652                         | -0.818 | 0.567 | 6.978 | -2.816 |
| ZNF658//ZNF658B//CTD-2173L22.4 | 0.496  | 1.410 | 4.950 | 1.860  |
| ZNF667                         | 0.214  | 1.160 | 4.506 | 1.013  |
| ZNF667-AS1//LOC100288114       | 0.075  | 1.053 | 7.459 | 0.347  |
| ZNF669                         | 0.393  | 1.313 | 3.786 | 1.463  |
| ZNF674-AS1                     | 0.070  | 1.050 | 3.455 | 0.270  |
| ZNF675                         | 1.013  | 2.019 | 2.534 | 3.775  |
| ZNF681                         | 0.722  | 1.650 | 3.631 | 2.682  |
| ZNF689                         | 0.264  | 1.201 | 3.029 | 1.015  |
| ZNF69                          | -0.697 | 0.617 | 2.893 | -2.735 |
| ZNF691                         | -0.462 | 0.726 | 3.075 | -1.696 |

|                      |        |       |       |        |
|----------------------|--------|-------|-------|--------|
| ZNF697               | 0.414  | 1.333 | 3.464 | 1.646  |
| ZNF699               | 0.124  | 1.090 | 3.851 | 0.475  |
| ZNF702P              | 0.610  | 1.527 | 2.981 | 1.684  |
| ZNF708               | -0.361 | 0.779 | 4.744 | -0.892 |
| ZNF710               | -0.437 | 0.739 | 3.237 | -2.067 |
| ZNF711               | 0.449  | 1.365 | 4.867 | 1.770  |
| ZNF714               | 0.652  | 1.571 | 2.644 | 1.680  |
| ZNF718//ZNF595       | -0.035 | 0.976 | 4.052 | -0.146 |
| ZNF721//ABCA11P      | 0.281  | 1.215 | 4.590 | 1.097  |
| ZNF724P              | 0.554  | 1.469 | 2.795 | 1.613  |
| ZNF727P//RP11-3N2.13 | -0.276 | 0.826 | 4.465 | -1.082 |
| ZNF727P//RP11-3N2.13 | 0.017  | 1.012 | 2.920 | 0.043  |
| ZNF749               | -0.008 | 0.995 | 3.310 | -0.032 |
| ZNF75D               | -0.117 | 0.922 | 3.398 | -0.498 |
| ZNF764               | -0.196 | 0.873 | 3.474 | -0.687 |
| ZNF770               | 0.455  | 1.371 | 6.360 | 1.916  |
| ZNF771               | 0.192  | 1.142 | 2.799 | 0.803  |
| ZNF774               | 0.195  | 1.145 | 4.119 | 0.800  |
| ZNF776               | 0.268  | 1.204 | 5.235 | 1.246  |
| ZNF780A              | 0.438  | 1.354 | 4.065 | 1.478  |
| ZNF780B              | 0.142  | 1.103 | 5.807 | 0.653  |
| ZNF781//ZFP30        | -0.308 | 0.808 | 3.898 | -1.425 |
| ZNF783               | -0.378 | 0.769 | 5.837 | -1.371 |
| ZNF786               | 0.356  | 1.280 | 4.862 | 1.147  |
| ZNF787               | -0.102 | 0.932 | 4.128 | -0.326 |
| ZNF789               | -0.282 | 0.823 | 3.367 | -1.142 |
| ZNF790-AS1           | 0.127  | 1.092 | 3.115 | 0.418  |
| ZNF791               | 0.197  | 1.146 | 6.429 | 0.955  |
| ZNF804A              | 0.871  | 1.829 | 3.891 | 1.869  |
| ZNF804B              | 1.213  | 2.318 | 3.919 | 2.950  |
| ZNF812//ZNF562       | -0.804 | 0.573 | 3.179 | -2.190 |
| ZNF814               | -0.104 | 0.931 | 3.780 | -0.422 |
| ZNF815P              | 0.284  | 1.217 | 3.522 | 1.196  |
| ZNF821               | 0.410  | 1.329 | 4.635 | 1.605  |
| ZNF826P              | -0.453 | 0.731 | 3.348 | -1.313 |
| ZNF829               | 0.315  | 1.244 | 2.346 | 1.230  |
| ZNF83                | -0.624 | 0.649 | 5.389 | -2.493 |
| ZNF831               | 0.814  | 1.758 | 2.810 | 2.319  |
| ZNF835               | -0.074 | 0.950 | 3.815 | -0.359 |
| ZNF836               | -0.037 | 0.975 | 4.668 | -0.117 |
| ZNF843               | -0.110 | 0.927 | 2.378 | -0.401 |
| ZNF844               | -0.675 | 0.627 | 4.660 | -2.220 |
| ZNF850               | -0.417 | 0.749 | 3.826 | -1.607 |
| ZNF852               | -0.038 | 0.974 | 3.042 | -0.158 |
| ZNF91                | 0.556  | 1.470 | 5.433 | 1.979  |
| ZNF91                | 0.578  | 1.493 | 2.930 | 1.831  |
| ZNF93                | 0.122  | 1.088 | 3.909 | 0.452  |
| ZNRF2P1              | -0.058 | 0.960 | 4.007 | -0.240 |
| ZRANB2-AS2           | 0.113  | 1.081 | 3.492 | 0.402  |
| ZRANB3               | 0.170  | 1.125 | 3.652 | 0.777  |

|           |        |       |       |        |
|-----------|--------|-------|-------|--------|
| ZSCAN12   | 0.263  | 1.200 | 3.026 | 1.099  |
| ZSCAN12P1 | -0.858 | 0.552 | 3.359 | -2.615 |
| ZSCAN16   | -0.109 | 0.927 | 2.841 | -0.374 |
| ZSCAN22   | 0.028  | 1.019 | 3.670 | 0.104  |
| ZSCAN23   | -0.107 | 0.929 | 3.850 | -0.399 |
| ZSCAN31   | -0.263 | 0.833 | 3.964 | -0.904 |
| ZSWIM1    | -0.179 | 0.883 | 3.712 | -0.819 |
| ZSWIM7    | -0.560 | 0.678 | 3.682 | -2.452 |
| ZUFSP     | 0.164  | 1.121 | 4.366 | 0.732  |
| ZWILCH    | 0.745  | 1.675 | 3.347 | 2.046  |
| ZXDA      | -0.023 | 0.984 | 3.892 | -0.088 |
| ZXDB      | -0.172 | 0.887 | 5.899 | -0.686 |
| ZYG11B    | 0.590  | 1.506 | 7.983 | 2.546  |
|           |        | 1.000 |       |        |
|           |        | 1.000 |       |        |



| <b>P.Value</b> | <b>adj.P.Val</b> | <b>B</b> | <b>logFC validation</b> | <b>ALS.FC</b> | <b>CTL.FC</b> |
|----------------|------------------|----------|-------------------------|---------------|---------------|
| 0.864          | 0.927            | -5.701   | 0.053                   | 3.843         | 3.790         |
| 0.746          | 0.853            | -5.665   | -0.100                  | 7.365         | 7.464         |
| 0.131          | 0.313            | -4.641   | -0.433                  | 3.986         | 4.419         |
| 0.363          | 0.554            | -5.323   | -0.258                  | 2.506         | 2.764         |
| 0.078          | 0.247            | -4.250   | 0.497                   | 6.316         | 5.819         |
| 0.170          | 0.360            | -4.827   | 0.359                   | 4.274         | 3.914         |
| 0.050          | 0.208            | -3.912   | 0.445                   | 5.135         | 4.689         |
| 0.024          | 0.173            | -3.315   | 0.592                   | 8.134         | 7.541         |
| 0.093          | 0.268            | -4.385   | 0.392                   | 6.585         | 6.193         |
| 0.065          | 0.229            | -4.118   | -0.543                  | 6.186         | 6.729         |
| 0.108          | 0.286            | -4.495   | -0.449                  | 5.713         | 6.162         |
| 0.010          | 0.157            | -2.616   | -1.034                  | 4.456         | 5.489         |
| 0.063          | 0.227            | -4.093   | 0.527                   | 2.824         | 2.298         |
| 0.593          | 0.745            | -5.579   | 0.162                   | 2.757         | 2.594         |
| 0.010          | 0.157            | -2.628   | -0.923                  | 8.163         | 9.086         |
| 0.336          | 0.532            | -5.278   | 0.240                   | 6.954         | 6.714         |
| 0.017          | 0.162            | -3.059   | -1.673                  | 4.305         | 5.979         |
| 0.002          | 0.157            | -1.332   | -1.552                  | 5.640         | 7.193         |
| 0.324          | 0.520            | -5.255   | -0.372                  | 5.023         | 5.396         |
| 0.358          | 0.552            | -5.316   | -0.200                  | 5.141         | 5.341         |
| 0.660          | 0.793            | -5.623   | 0.109                   | 1.949         | 1.840         |
| 0.375          | 0.565            | -5.343   | -0.471                  | 2.115         | 2.587         |
| 0.123          | 0.304            | -4.596   | -0.454                  | 4.486         | 4.939         |
| 0.386          | 0.574            | -5.359   | 0.193                   | 6.785         | 6.592         |
| 0.421          | 0.607            | -5.408   | 0.231                   | 4.941         | 4.710         |
| 0.106          | 0.284            | -4.482   | 0.561                   | 6.654         | 6.093         |
| 0.020          | 0.166            | -3.168   | 1.043                   | 6.361         | 5.318         |
| 0.248          | 0.446            | -5.084   | -0.270                  | 4.288         | 4.559         |
| 0.670          | 0.801            | -5.629   | -0.102                  | 5.785         | 5.887         |
| 0.383          | 0.572            | -5.355   | -0.297                  | 5.528         | 5.825         |
| 0.031          | 0.182            | -3.547   | 0.853                   | 5.637         | 4.784         |
| 0.004          | 0.157            | -1.935   | 0.981                   | 4.397         | 3.415         |
| 0.064          | 0.229            | -4.107   | 0.375                   | 6.284         | 5.909         |
| 0.005          | 0.157            | -2.038   | -0.871                  | 2.930         | 3.801         |
| 0.433          | 0.617            | -5.423   | 0.171                   | 2.199         | 2.028         |
| 0.198          | 0.392            | -4.932   | 0.341                   | 2.900         | 2.559         |
| 0.306          | 0.503            | -5.219   | -0.301                  | 6.386         | 6.687         |
| 0.055          | 0.216            | -3.981   | -0.557                  | 4.197         | 4.754         |
| 0.242          | 0.439            | -5.068   | -0.374                  | 5.119         | 5.493         |
| 0.081          | 0.252            | -4.280   | -0.495                  | 4.334         | 4.830         |
| 0.051          | 0.209            | -3.929   | 0.747                   | 6.857         | 6.111         |
| 0.143          | 0.327            | -4.702   | -0.532                  | 3.752         | 4.285         |
| 0.079          | 0.249            | -4.262   | -0.740                  | 3.967         | 4.707         |
| 0.010          | 0.157            | -2.646   | -0.564                  | 6.678         | 7.242         |
| 0.057          | 0.218            | -4.008   | 0.768                   | 6.414         | 5.645         |
| 0.685          | 0.811            | -5.637   | -0.106                  | 5.862         | 5.968         |
| 0.060          | 0.221            | -4.048   | 0.587                   | 3.828         | 3.241         |
| 0.866          | 0.928            | -5.701   | 0.040                   | 4.491         | 4.451         |
| 0.103          | 0.280            | -4.461   | 0.403                   | 4.349         | 3.946         |

|       |       |        |        |       |       |
|-------|-------|--------|--------|-------|-------|
| 0.037 | 0.190 | -3.674 | -0.876 | 4.649 | 5.525 |
| 0.088 | 0.262 | -4.348 | -0.506 | 4.069 | 4.575 |
| 0.142 | 0.326 | -4.699 | -0.440 | 3.595 | 4.034 |
| 0.987 | 0.993 | -5.715 | 0.004  | 2.418 | 2.413 |
| 0.630 | 0.771 | -5.605 | 0.152  | 3.885 | 3.733 |
| 0.647 | 0.784 | -5.615 | 0.151  | 3.262 | 3.110 |
| 0.078 | 0.248 | -4.254 | -0.469 | 5.031 | 5.500 |
| 0.200 | 0.396 | -4.941 | -0.428 | 1.940 | 2.368 |
| 0.751 | 0.856 | -5.667 | -0.112 | 1.633 | 1.745 |
| 0.471 | 0.650 | -5.469 | -0.362 | 4.212 | 4.574 |
| 0.326 | 0.522 | -5.258 | 0.285  | 3.747 | 3.462 |
| 0.067 | 0.233 | -4.142 | 0.512  | 4.940 | 4.427 |
| 0.130 | 0.311 | -4.634 | -0.402 | 3.442 | 3.844 |
| 0.306 | 0.504 | -5.220 | -0.273 | 2.542 | 2.816 |
| 0.160 | 0.348 | -4.781 | -0.499 | 4.002 | 4.501 |
| 0.009 | 0.157 | -2.548 | 0.803  | 3.247 | 2.444 |
| 0.789 | 0.880 | -5.681 | -0.083 | 1.760 | 1.843 |
| 0.896 | 0.943 | -5.707 | -0.036 | 2.955 | 2.991 |
| 0.113 | 0.292 | -4.532 | 0.580  | 5.746 | 5.166 |
| 0.239 | 0.437 | -5.060 | -0.342 | 3.622 | 3.964 |
| 0.005 | 0.157 | -2.046 | -0.899 | 2.287 | 3.186 |
| 0.847 | 0.915 | -5.697 | 0.054  | 3.280 | 3.226 |
| 0.384 | 0.573 | -5.357 | -0.241 | 2.055 | 2.296 |
| 0.059 | 0.221 | -4.037 | -1.410 | 1.152 | 2.562 |
| 0.174 | 0.363 | -4.841 | 0.393  | 3.320 | 2.927 |
| 0.385 | 0.573 | -5.357 | -0.214 | 1.935 | 2.150 |
| 0.365 | 0.557 | -5.327 | 0.237  | 3.518 | 3.280 |
| 0.419 | 0.606 | -5.406 | 0.257  | 2.927 | 2.670 |
| 0.352 | 0.546 | -5.305 | 0.224  | 2.015 | 1.791 |
| 0.021 | 0.168 | -3.222 | 0.673  | 3.996 | 3.323 |
| 0.165 | 0.354 | -4.806 | -0.689 | 1.686 | 2.376 |
| 0.063 | 0.226 | -4.088 | 0.699  | 4.460 | 3.761 |
| 0.201 | 0.397 | -4.944 | 0.350  | 3.622 | 3.272 |
| 0.193 | 0.387 | -4.916 | -0.376 | 2.669 | 3.046 |
| 0.357 | 0.551 | -5.314 | 0.272  | 2.781 | 2.509 |
| 0.074 | 0.242 | -4.212 | -0.811 | 1.850 | 2.661 |
| 0.171 | 0.361 | -4.828 | -0.458 | 5.029 | 5.487 |
| 0.312 | 0.509 | -5.231 | 0.275  | 4.104 | 3.829 |
| 0.038 | 0.192 | -3.699 | 0.605  | 2.583 | 1.978 |
| 0.240 | 0.437 | -5.061 | 0.313  | 3.235 | 2.922 |
| 0.943 | 0.970 | -5.712 | 0.022  | 2.505 | 2.483 |
| 0.013 | 0.160 | -2.816 | -0.740 | 1.799 | 2.540 |
| 0.011 | 0.157 | -2.662 | -1.460 | 2.313 | 3.773 |
| 0.021 | 0.168 | -3.232 | 0.611  | 2.953 | 2.341 |
| 0.079 | 0.249 | -4.261 | -0.600 | 2.078 | 2.677 |
| 0.400 | 0.588 | -5.380 | 0.495  | 2.816 | 2.321 |
| 0.126 | 0.306 | -4.609 | 0.411  | 3.655 | 3.245 |
| 0.017 | 0.162 | -3.070 | 0.940  | 4.093 | 3.153 |
| 0.140 | 0.324 | -4.690 | 0.439  | 3.023 | 2.584 |
| 0.008 | 0.157 | -2.419 | 1.479  | 4.232 | 2.752 |

|       |       |        |        |       |       |
|-------|-------|--------|--------|-------|-------|
| 0.776 | 0.871 | -5.676 | 0.076  | 3.757 | 3.681 |
| 0.984 | 0.992 | -5.715 | -0.005 | 2.066 | 2.071 |
| 0.111 | 0.290 | -4.519 | -0.413 | 3.297 | 3.709 |
| 0.625 | 0.767 | -5.602 | -0.147 | 2.588 | 2.735 |
| 0.140 | 0.324 | -4.689 | 0.467  | 3.044 | 2.577 |
| 0.405 | 0.593 | -5.387 | -0.257 | 3.231 | 3.488 |
| 0.004 | 0.157 | -1.804 | 0.917  | 4.531 | 3.613 |
| 0.174 | 0.364 | -4.844 | -0.358 | 2.540 | 2.898 |
| 0.159 | 0.348 | -4.781 | 0.344  | 2.670 | 2.326 |
| 0.007 | 0.157 | -2.358 | 0.923  | 4.002 | 3.078 |
| 0.880 | 0.935 | -5.704 | 0.036  | 2.528 | 2.492 |
| 0.814 | 0.895 | -5.689 | 0.057  | 2.673 | 2.616 |
| 0.001 | 0.157 | -0.267 | 1.132  | 2.735 | 1.603 |
| 0.465 | 0.644 | -5.462 | 0.244  | 5.938 | 5.694 |
| 0.356 | 0.550 | -5.312 | -0.305 | 2.224 | 2.529 |
| 0.187 | 0.379 | -4.892 | -0.482 | 3.934 | 4.416 |
| 0.060 | 0.222 | -4.054 | -0.517 | 2.830 | 3.346 |
| 0.679 | 0.808 | -5.634 | 0.124  | 3.010 | 2.886 |
| 0.412 | 0.599 | -5.396 | 0.211  | 2.651 | 2.440 |
| 0.000 | 0.157 | -0.100 | 1.861  | 4.429 | 2.568 |
| 0.358 | 0.551 | -5.315 | -0.272 | 2.183 | 2.455 |
| 0.760 | 0.862 | -5.671 | -0.063 | 5.591 | 5.653 |
| 0.080 | 0.252 | -4.277 | -0.560 | 2.822 | 3.383 |
| 0.045 | 0.201 | -3.824 | -0.514 | 5.443 | 5.957 |
| 0.112 | 0.291 | -4.526 | 0.560  | 2.805 | 2.245 |
| 0.096 | 0.273 | -4.413 | -0.435 | 1.892 | 2.327 |
| 0.327 | 0.523 | -5.261 | 0.293  | 2.502 | 2.209 |
| 0.406 | 0.593 | -5.388 | -0.454 | 2.463 | 2.917 |
| 0.596 | 0.747 | -5.582 | -0.147 | 2.980 | 3.127 |
| 0.002 | 0.157 | -1.470 | 1.154  | 3.057 | 1.903 |
| 0.650 | 0.786 | -5.617 | 0.140  | 2.841 | 2.701 |
| 0.868 | 0.928 | -5.702 | -0.051 | 2.236 | 2.287 |
| 0.494 | 0.667 | -5.494 | 0.233  | 4.782 | 4.549 |
| 0.385 | 0.574 | -5.358 | 0.281  | 3.853 | 3.572 |
| 0.161 | 0.350 | -4.789 | -0.586 | 1.819 | 2.405 |
| 0.106 | 0.284 | -4.483 | -0.472 | 3.443 | 3.915 |
| 0.060 | 0.221 | -4.046 | -1.209 | 1.984 | 3.193 |
| 0.685 | 0.811 | -5.637 | 0.152  | 6.241 | 6.089 |
| 0.910 | 0.951 | -5.709 | -0.038 | 2.996 | 3.034 |
| 0.170 | 0.360 | -4.827 | -0.336 | 4.863 | 5.199 |
| 0.929 | 0.961 | -5.711 | 0.025  | 1.935 | 1.909 |
| 0.026 | 0.176 | -3.403 | 0.748  | 5.290 | 4.542 |
| 0.498 | 0.670 | -5.497 | 0.203  | 5.914 | 5.711 |
| 0.825 | 0.901 | -5.692 | -0.063 | 6.727 | 6.790 |
| 0.076 | 0.245 | -4.234 | -0.412 | 3.217 | 3.629 |
| 0.471 | 0.650 | -5.469 | 0.194  | 4.438 | 4.244 |
| 0.353 | 0.548 | -5.308 | -0.330 | 4.483 | 4.814 |
| 0.094 | 0.270 | -4.395 | 0.657  | 5.112 | 4.455 |
| 0.978 | 0.989 | -5.714 | 0.008  | 3.514 | 3.506 |
| 0.702 | 0.822 | -5.646 | 0.109  | 8.178 | 8.069 |

|       |       |        |        |       |       |
|-------|-------|--------|--------|-------|-------|
| 0.623 | 0.766 | -5.601 | 0.131  | 4.914 | 4.783 |
| 0.047 | 0.204 | -3.864 | -0.521 | 3.405 | 3.925 |
| 0.824 | 0.900 | -5.691 | -0.059 | 2.246 | 2.305 |
| 0.616 | 0.760 | -5.595 | -0.233 | 2.813 | 3.046 |
| 0.449 | 0.631 | -5.444 | -0.215 | 4.900 | 5.115 |
| 0.515 | 0.682 | -5.514 | -0.138 | 3.406 | 3.544 |
| 0.091 | 0.267 | -4.371 | -0.674 | 6.156 | 6.830 |
| 0.171 | 0.361 | -4.829 | 0.295  | 7.854 | 7.558 |
| 0.757 | 0.860 | -5.669 | 0.082  | 2.612 | 2.531 |
| 0.045 | 0.203 | -3.833 | 0.543  | 5.794 | 5.251 |
| 0.037 | 0.190 | -3.671 | 0.668  | 4.422 | 3.753 |
| 0.986 | 0.992 | -5.715 | 0.005  | 3.961 | 3.956 |
| 0.554 | 0.715 | -5.549 | -0.146 | 5.509 | 5.655 |
| 0.359 | 0.552 | -5.317 | 0.235  | 6.144 | 5.910 |
| 0.270 | 0.468 | -5.139 | 0.329  | 3.055 | 2.726 |
| 0.589 | 0.742 | -5.577 | 0.217  | 3.197 | 2.980 |
| 0.065 | 0.229 | -4.114 | 0.535  | 4.265 | 3.730 |
| 0.080 | 0.251 | -4.276 | -0.463 | 3.525 | 3.988 |
| 0.023 | 0.173 | -3.292 | 0.970  | 5.888 | 4.918 |
| 0.055 | 0.216 | -3.989 | 0.786  | 4.624 | 3.838 |
| 0.550 | 0.711 | -5.546 | -0.202 | 6.201 | 6.404 |
| 0.165 | 0.354 | -4.804 | 0.294  | 6.723 | 6.429 |
| 0.057 | 0.218 | -4.010 | 0.483  | 6.803 | 6.320 |
| 0.360 | 0.553 | -5.319 | 0.323  | 6.507 | 6.184 |
| 0.127 | 0.308 | -4.620 | 0.315  | 6.080 | 5.765 |
| 0.255 | 0.452 | -5.103 | -0.291 | 3.114 | 3.405 |
| 0.020 | 0.166 | -3.166 | 0.664  | 5.973 | 5.309 |
| 0.294 | 0.491 | -5.195 | 0.322  | 5.336 | 5.013 |
| 0.092 | 0.267 | -4.376 | 0.369  | 5.348 | 4.979 |
| 0.245 | 0.442 | -5.076 | 0.304  | 3.491 | 3.188 |
| 0.029 | 0.178 | -3.491 | -1.047 | 3.344 | 4.391 |
| 0.006 | 0.157 | -2.220 | -0.774 | 4.420 | 5.194 |
| 0.004 | 0.157 | -1.950 | 1.181  | 6.300 | 5.119 |
| 0.827 | 0.902 | -5.692 | -0.057 | 3.487 | 3.544 |
| 0.681 | 0.809 | -5.635 | -0.103 | 4.006 | 4.109 |
| 0.769 | 0.868 | -5.674 | 0.065  | 4.812 | 4.746 |
| 0.245 | 0.442 | -5.076 | 0.325  | 4.293 | 3.968 |
| 0.294 | 0.491 | -5.195 | 0.336  | 5.321 | 4.985 |
| 0.059 | 0.221 | -4.045 | 0.493  | 8.057 | 7.564 |
| 0.072 | 0.239 | -4.189 | 0.909  | 8.840 | 7.931 |
| 0.052 | 0.210 | -3.935 | -0.908 | 4.867 | 5.775 |
| 0.957 | 0.978 | -5.713 | 0.017  | 2.931 | 2.914 |
| 0.906 | 0.949 | -5.708 | 0.027  | 2.552 | 2.525 |
| 0.391 | 0.578 | -5.366 | -0.257 | 5.003 | 5.260 |
| 0.021 | 0.168 | -3.231 | -0.950 | 1.670 | 2.620 |
| 0.810 | 0.893 | -5.687 | 0.075  | 2.825 | 2.751 |
| 0.976 | 0.988 | -5.714 | -0.012 | 2.104 | 2.116 |
| 0.035 | 0.186 | -3.629 | 0.691  | 3.093 | 2.403 |
| 0.595 | 0.746 | -5.581 | 0.157  | 3.603 | 3.445 |
| 0.463 | 0.643 | -5.460 | -0.545 | 2.593 | 3.138 |

|       |       |        |        |       |       |
|-------|-------|--------|--------|-------|-------|
| 0.259 | 0.457 | -5.114 | 0.299  | 3.424 | 3.125 |
| 0.487 | 0.662 | -5.486 | 0.234  | 3.530 | 3.296 |
| 0.013 | 0.160 | -2.845 | 0.955  | 3.828 | 2.874 |
| 0.142 | 0.326 | -4.698 | -0.683 | 4.750 | 5.432 |
| 0.366 | 0.557 | -5.328 | -0.215 | 2.912 | 3.127 |
| 0.692 | 0.816 | -5.641 | -0.132 | 2.588 | 2.720 |
| 0.768 | 0.867 | -5.674 | 0.089  | 4.508 | 4.419 |
| 0.532 | 0.696 | -5.530 | 0.227  | 6.307 | 6.080 |
| 0.332 | 0.528 | -5.271 | 0.326  | 4.638 | 4.312 |
| 0.170 | 0.360 | -4.825 | -0.352 | 3.684 | 4.035 |
| 0.153 | 0.340 | -4.750 | -0.477 | 4.227 | 4.704 |
| 0.384 | 0.572 | -5.356 | -0.302 | 1.772 | 2.074 |
| 0.105 | 0.282 | -4.474 | 0.445  | 3.137 | 2.692 |
| 0.025 | 0.174 | -3.348 | -0.801 | 4.472 | 5.273 |
| 0.142 | 0.326 | -4.699 | 0.392  | 6.025 | 5.633 |
| 0.611 | 0.757 | -5.592 | -0.149 | 1.642 | 1.791 |
| 0.221 | 0.417 | -5.007 | 0.307  | 3.900 | 3.593 |
| 0.018 | 0.163 | -3.101 | 1.341  | 9.018 | 7.677 |
| 0.001 | 0.157 | -0.547 | -1.013 | 3.569 | 4.583 |
| 0.053 | 0.213 | -3.956 | -0.567 | 4.012 | 4.580 |
| 0.324 | 0.520 | -5.254 | -0.260 | 6.164 | 6.423 |
| 0.094 | 0.270 | -4.393 | 0.511  | 5.658 | 5.147 |
| 0.441 | 0.625 | -5.434 | 0.324  | 3.713 | 3.389 |
| 0.803 | 0.889 | -5.685 | 0.074  | 6.552 | 6.478 |
| 0.026 | 0.176 | -3.405 | 1.060  | 7.405 | 6.346 |
| 0.384 | 0.573 | -5.356 | -0.260 | 2.493 | 2.752 |
| 0.365 | 0.557 | -5.327 | 0.419  | 2.436 | 2.017 |
| 0.006 | 0.157 | -2.201 | -0.866 | 4.781 | 5.647 |
| 0.918 | 0.956 | -5.710 | 0.024  | 4.682 | 4.658 |
| 0.296 | 0.493 | -5.198 | -0.453 | 3.948 | 4.401 |
| 0.741 | 0.849 | -5.663 | 0.088  | 4.546 | 4.458 |
| 0.002 | 0.157 | -1.230 | 1.014  | 5.264 | 4.250 |
| 0.046 | 0.203 | -3.842 | -0.718 | 4.082 | 4.800 |
| 0.027 | 0.176 | -3.410 | 0.762  | 5.100 | 4.338 |
| 0.047 | 0.204 | -3.861 | 0.726  | 4.432 | 3.706 |
| 0.603 | 0.752 | -5.586 | 0.154  | 3.706 | 3.552 |
| 0.849 | 0.917 | -5.698 | -0.062 | 3.304 | 3.365 |
| 0.998 | 0.999 | -5.715 | -0.001 | 2.852 | 2.853 |
| 0.020 | 0.167 | -3.184 | 1.013  | 6.129 | 5.116 |
| 0.107 | 0.285 | -4.489 | 0.391  | 6.986 | 6.595 |
| 0.014 | 0.160 | -2.891 | 0.877  | 8.610 | 7.733 |
| 0.031 | 0.181 | -3.539 | -0.497 | 3.678 | 4.176 |
| 0.404 | 0.592 | -5.386 | -0.244 | 3.212 | 3.456 |
| 0.319 | 0.517 | -5.245 | -0.256 | 3.095 | 3.351 |
| 0.157 | 0.345 | -4.772 | 0.365  | 9.465 | 9.100 |
| 0.185 | 0.376 | -4.884 | -0.435 | 3.422 | 3.858 |
| 0.427 | 0.612 | -5.416 | -0.256 | 3.396 | 3.652 |
| 0.606 | 0.753 | -5.589 | -0.153 | 2.890 | 3.043 |
| 0.256 | 0.453 | -5.104 | 0.339  | 4.435 | 4.096 |
| 0.318 | 0.516 | -5.243 | 0.520  | 6.652 | 6.132 |

|       |       |        |        |       |       |
|-------|-------|--------|--------|-------|-------|
| 0.040 | 0.194 | -3.727 | 0.534  | 6.215 | 5.681 |
| 0.026 | 0.175 | -3.379 | -0.599 | 3.845 | 4.444 |
| 0.091 | 0.266 | -4.370 | 0.348  | 7.786 | 7.438 |
| 0.525 | 0.690 | -5.523 | -0.191 | 4.710 | 4.901 |
| 0.012 | 0.159 | -2.735 | -0.777 | 2.615 | 3.392 |
| 0.004 | 0.157 | -1.817 | 1.826  | 8.088 | 6.262 |
| 0.013 | 0.160 | -2.816 | 0.673  | 3.767 | 3.094 |
| 0.409 | 0.596 | -5.392 | -0.244 | 5.922 | 6.166 |
| 0.057 | 0.218 | -4.009 | 0.497  | 3.281 | 2.784 |
| 0.007 | 0.157 | -2.327 | 1.075  | 5.388 | 4.313 |
| 0.066 | 0.231 | -4.128 | 0.528  | 2.517 | 1.989 |
| 0.521 | 0.687 | -5.519 | -0.171 | 5.527 | 5.698 |
| 0.246 | 0.444 | -5.080 | 0.210  | 7.436 | 7.226 |
| 0.035 | 0.187 | -3.636 | 0.473  | 6.076 | 5.604 |
| 0.049 | 0.207 | -3.899 | 0.508  | 6.459 | 5.951 |
| 0.082 | 0.253 | -4.289 | 0.452  | 3.845 | 3.394 |
| 0.039 | 0.193 | -3.715 | -0.820 | 1.799 | 2.618 |
| 0.027 | 0.176 | -3.422 | -0.838 | 5.941 | 6.779 |
| 0.051 | 0.208 | -3.922 | -0.781 | 4.286 | 5.067 |
| 0.168 | 0.358 | -4.819 | -0.397 | 6.577 | 6.973 |
| 0.046 | 0.203 | -3.839 | -0.694 | 3.357 | 4.051 |
| 0.176 | 0.366 | -4.852 | -0.364 | 6.127 | 6.491 |
| 0.264 | 0.461 | -5.124 | 0.565  | 6.537 | 5.972 |
| 0.438 | 0.622 | -5.430 | -0.223 | 6.612 | 6.834 |
| 0.122 | 0.303 | -4.587 | -0.405 | 4.456 | 4.861 |
| 0.398 | 0.585 | -5.376 | -0.418 | 5.038 | 5.456 |
| 0.485 | 0.661 | -5.484 | -0.386 | 5.359 | 5.745 |
| 0.514 | 0.681 | -5.513 | -0.353 | 5.409 | 5.762 |
| 0.181 | 0.373 | -4.872 | -0.390 | 3.137 | 3.528 |
| 0.365 | 0.557 | -5.327 | 0.257  | 5.100 | 4.843 |
| 0.056 | 0.218 | -4.002 | 0.552  | 2.293 | 1.740 |
| 0.000 | 0.083 | 2.274  | 2.165  | 4.625 | 2.460 |
| 0.008 | 0.157 | -2.426 | 0.963  | 2.874 | 1.911 |
| 0.464 | 0.644 | -5.461 | 0.232  | 7.078 | 6.846 |
| 0.101 | 0.278 | -4.450 | 0.535  | 9.122 | 8.588 |
| 0.106 | 0.284 | -4.482 | 0.325  | 8.581 | 8.256 |
| 0.030 | 0.180 | -3.518 | 0.899  | 6.823 | 5.925 |
| 0.055 | 0.216 | -3.991 | -0.522 | 2.307 | 2.830 |
| 0.026 | 0.176 | -3.400 | 1.319  | 4.850 | 3.530 |
| 0.107 | 0.286 | -4.494 | -0.432 | 3.548 | 3.980 |
| 0.922 | 0.958 | -5.710 | -0.029 | 3.028 | 3.057 |
| 0.773 | 0.870 | -5.675 | -0.082 | 3.677 | 3.759 |
| 0.243 | 0.440 | -5.070 | 0.313  | 2.634 | 2.321 |
| 0.038 | 0.191 | -3.685 | 0.476  | 8.419 | 7.943 |
| 0.305 | 0.503 | -5.218 | -0.323 | 3.027 | 3.351 |
| 0.232 | 0.429 | -5.041 | 0.429  | 2.945 | 2.516 |
| 0.034 | 0.185 | -3.614 | -0.474 | 4.305 | 4.779 |
| 0.113 | 0.291 | -4.528 | 0.368  | 6.541 | 6.173 |
| 0.498 | 0.669 | -5.497 | -0.425 | 2.916 | 3.341 |
| 0.032 | 0.182 | -3.552 | -0.644 | 6.067 | 6.711 |

|       |       |        |        |       |       |
|-------|-------|--------|--------|-------|-------|
| 0.060 | 0.222 | -4.054 | -0.631 | 6.334 | 6.965 |
| 0.180 | 0.371 | -4.866 | 0.384  | 4.886 | 4.502 |
| 0.398 | 0.586 | -5.377 | -0.250 | 3.058 | 3.308 |
| 0.972 | 0.986 | -5.714 | 0.010  | 2.697 | 2.687 |
| 0.150 | 0.336 | -4.738 | -0.351 | 6.392 | 6.743 |
| 0.893 | 0.941 | -5.706 | 0.040  | 4.916 | 4.877 |
| 0.385 | 0.574 | -5.358 | -0.218 | 3.938 | 4.155 |
| 0.555 | 0.715 | -5.550 | 0.182  | 3.238 | 3.056 |
| 0.967 | 0.984 | -5.714 | -0.015 | 2.284 | 2.299 |
| 0.413 | 0.601 | -5.398 | 0.185  | 5.061 | 4.876 |
| 0.464 | 0.644 | -5.461 | -0.241 | 2.254 | 2.496 |
| 0.032 | 0.182 | -3.551 | 0.775  | 2.917 | 2.141 |
| 0.059 | 0.221 | -4.038 | 0.482  | 3.774 | 3.291 |
| 0.773 | 0.870 | -5.675 | -0.145 | 2.537 | 2.682 |
| 0.471 | 0.650 | -5.469 | -0.309 | 4.226 | 4.535 |
| 0.563 | 0.721 | -5.556 | -0.276 | 6.163 | 6.439 |
| 0.614 | 0.758 | -5.594 | -0.201 | 3.430 | 3.631 |
| 0.014 | 0.160 | -2.915 | 0.745  | 5.894 | 5.149 |
| 0.089 | 0.264 | -4.356 | 0.339  | 6.334 | 5.995 |
| 0.017 | 0.162 | -3.034 | -0.793 | 2.117 | 2.910 |
| 0.829 | 0.904 | -5.693 | -0.060 | 2.535 | 2.595 |
| 0.370 | 0.560 | -5.334 | 0.246  | 3.248 | 3.002 |
| 0.009 | 0.157 | -2.531 | -0.793 | 6.081 | 6.874 |
| 0.001 | 0.157 | -0.398 | 1.036  | 4.501 | 3.465 |
| 0.949 | 0.974 | -5.713 | -0.019 | 2.022 | 2.040 |
| 0.173 | 0.362 | -4.839 | 0.611  | 6.401 | 5.790 |
| 0.650 | 0.786 | -5.617 | 0.125  | 2.843 | 2.718 |
| 0.172 | 0.362 | -4.835 | 0.271  | 6.720 | 6.449 |
| 0.075 | 0.243 | -4.220 | -0.519 | 4.071 | 4.591 |
| 0.069 | 0.235 | -4.156 | 1.111  | 8.258 | 7.147 |
| 0.702 | 0.822 | -5.645 | 0.111  | 4.084 | 3.973 |
| 0.161 | 0.349 | -4.786 | 0.294  | 5.725 | 5.431 |
| 0.415 | 0.602 | -5.400 | 0.254  | 2.833 | 2.579 |
| 0.676 | 0.805 | -5.632 | -0.119 | 3.668 | 3.787 |
| 0.605 | 0.753 | -5.588 | 0.110  | 5.785 | 5.675 |
| 0.603 | 0.752 | -5.587 | -0.180 | 3.167 | 3.346 |
| 0.176 | 0.365 | -4.850 | -0.599 | 5.361 | 5.959 |
| 0.566 | 0.722 | -5.559 | 0.172  | 3.056 | 2.884 |
| 0.007 | 0.157 | -2.298 | -1.004 | 3.969 | 4.973 |
| 0.776 | 0.871 | -5.676 | 0.127  | 5.808 | 5.681 |
| 0.833 | 0.907 | -5.694 | -0.065 | 3.305 | 3.370 |
| 0.550 | 0.710 | -5.545 | 0.289  | 5.455 | 5.166 |
| 0.258 | 0.456 | -5.111 | 0.208  | 9.471 | 9.263 |
| 0.331 | 0.527 | -5.268 | 0.213  | 8.421 | 8.207 |
| 0.098 | 0.275 | -4.426 | -0.482 | 2.533 | 3.015 |
| 0.152 | 0.339 | -4.746 | -0.451 | 4.457 | 4.908 |
| 0.011 | 0.157 | -2.686 | -0.533 | 6.603 | 7.136 |
| 0.450 | 0.631 | -5.444 | 0.204  | 2.696 | 2.492 |
| 0.002 | 0.157 | -1.231 | 0.795  | 6.585 | 5.791 |
| 0.429 | 0.615 | -5.419 | -0.228 | 5.968 | 6.196 |

|       |       |        |        |       |       |
|-------|-------|--------|--------|-------|-------|
| 0.996 | 0.998 | -5.715 | -0.002 | 5.967 | 5.970 |
| 0.116 | 0.296 | -4.548 | -0.429 | 5.791 | 6.220 |
| 0.106 | 0.284 | -4.484 | 0.330  | 7.188 | 6.857 |
| 0.070 | 0.236 | -4.166 | 0.383  | 6.511 | 6.129 |
| 0.119 | 0.299 | -4.571 | 0.635  | 4.789 | 4.154 |
| 0.003 | 0.157 | -1.492 | 1.025  | 4.765 | 3.740 |
| 0.326 | 0.522 | -5.258 | 0.297  | 4.303 | 4.006 |
| 0.082 | 0.253 | -4.288 | 0.553  | 6.977 | 6.425 |
| 0.122 | 0.302 | -4.585 | 0.516  | 7.140 | 6.623 |
| 0.002 | 0.157 | -1.343 | 1.435  | 5.280 | 3.845 |
| 0.616 | 0.760 | -5.596 | 0.342  | 3.527 | 3.185 |
| 0.491 | 0.665 | -5.490 | 0.260  | 2.019 | 1.758 |
| 0.132 | 0.315 | -4.645 | 0.488  | 5.342 | 4.855 |
| 0.268 | 0.467 | -5.136 | 0.246  | 5.872 | 5.627 |
| 0.983 | 0.991 | -5.715 | 0.009  | 2.745 | 2.736 |
| 0.229 | 0.426 | -5.031 | 0.561  | 6.418 | 5.857 |
| 0.031 | 0.180 | -3.522 | 1.105  | 3.872 | 2.766 |
| 0.037 | 0.190 | -3.671 | 0.653  | 5.415 | 4.762 |
| 0.073 | 0.241 | -4.199 | 0.661  | 3.985 | 3.324 |
| 0.095 | 0.271 | -4.401 | 0.556  | 4.551 | 3.995 |
| 0.227 | 0.424 | -5.026 | -0.405 | 2.199 | 2.604 |
| 0.101 | 0.278 | -4.450 | 0.658  | 4.924 | 4.266 |
| 0.980 | 0.989 | -5.714 | 0.007  | 6.865 | 6.857 |
| 0.497 | 0.669 | -5.496 | -0.266 | 4.892 | 5.158 |
| 0.004 | 0.157 | -1.879 | -0.715 | 7.705 | 8.420 |
| 0.145 | 0.329 | -4.713 | 0.485  | 5.296 | 4.810 |
| 0.011 | 0.159 | -2.731 | -0.714 | 5.149 | 5.862 |
| 0.301 | 0.498 | -5.209 | -0.382 | 2.693 | 3.075 |
| 0.234 | 0.430 | -5.045 | 0.293  | 4.906 | 4.613 |
| 0.841 | 0.912 | -5.696 | 0.052  | 6.067 | 6.016 |
| 0.528 | 0.693 | -5.526 | -0.172 | 3.467 | 3.639 |
| 0.022 | 0.169 | -3.242 | 0.715  | 7.249 | 6.534 |
| 0.188 | 0.380 | -4.897 | -0.364 | 4.202 | 4.566 |
| 0.006 | 0.157 | -2.156 | -1.277 | 7.251 | 8.528 |
| 0.013 | 0.160 | -2.822 | 1.530  | 6.492 | 4.961 |
| 0.993 | 0.996 | -5.715 | -0.003 | 6.218 | 6.221 |
| 0.015 | 0.160 | -2.945 | 0.755  | 7.551 | 6.797 |
| 0.476 | 0.653 | -5.474 | 0.184  | 7.817 | 7.633 |
| 0.001 | 0.157 | -0.846 | -1.064 | 3.406 | 4.470 |
| 0.003 | 0.157 | -1.646 | -0.743 | 3.650 | 4.393 |
| 0.867 | 0.928 | -5.702 | 0.064  | 2.073 | 2.009 |
| 0.298 | 0.494 | -5.202 | -0.276 | 5.671 | 5.947 |
| 0.169 | 0.359 | -4.820 | -0.280 | 4.521 | 4.801 |
| 0.359 | 0.552 | -5.316 | 0.308  | 4.414 | 4.106 |
| 0.128 | 0.309 | -4.621 | 0.436  | 5.289 | 4.853 |
| 0.328 | 0.523 | -5.262 | -0.395 | 1.940 | 2.335 |
| 0.558 | 0.717 | -5.552 | 0.162  | 6.991 | 6.829 |
| 0.054 | 0.215 | -3.975 | 0.469  | 2.750 | 2.281 |
| 0.216 | 0.411 | -4.992 | -0.332 | 2.083 | 2.414 |
| 0.234 | 0.431 | -5.046 | 0.384  | 5.131 | 4.746 |



|       |       |        |        |       |       |
|-------|-------|--------|--------|-------|-------|
| 0.327 | 0.523 | -5.261 | -0.261 | 6.275 | 6.536 |
| 0.018 | 0.163 | -3.103 | -0.668 | 7.301 | 7.970 |
| 0.029 | 0.178 | -3.471 | 0.736  | 9.718 | 8.981 |
| 0.459 | 0.640 | -5.456 | -0.202 | 4.441 | 4.642 |
| 0.892 | 0.941 | -5.706 | -0.040 | 2.343 | 2.383 |
| 0.330 | 0.526 | -5.267 | -0.386 | 2.277 | 2.664 |
| 0.349 | 0.544 | -5.300 | 0.221  | 2.765 | 2.545 |
| 0.139 | 0.323 | -4.682 | -0.488 | 3.778 | 4.267 |
| 0.465 | 0.645 | -5.462 | 0.237  | 2.999 | 2.762 |
| 0.174 | 0.364 | -4.844 | -0.564 | 4.932 | 5.496 |
| 0.539 | 0.701 | -5.536 | -0.218 | 2.220 | 2.438 |
| 0.104 | 0.281 | -4.470 | 0.552  | 2.559 | 2.007 |
| 0.516 | 0.683 | -5.515 | -0.191 | 3.078 | 3.270 |
| 0.744 | 0.851 | -5.664 | 0.088  | 4.106 | 4.018 |
| 0.210 | 0.405 | -4.973 | -0.333 | 2.727 | 3.060 |
| 0.228 | 0.424 | -5.027 | -0.567 | 3.026 | 3.592 |
| 0.132 | 0.315 | -4.648 | 0.479  | 5.098 | 4.619 |
| 0.018 | 0.163 | -3.115 | 0.688  | 5.809 | 5.121 |
| 0.737 | 0.847 | -5.661 | -0.107 | 3.496 | 3.603 |
| 0.019 | 0.165 | -3.156 | 0.689  | 6.298 | 5.609 |
| 0.333 | 0.529 | -5.271 | -0.271 | 4.978 | 5.249 |
| 0.090 | 0.264 | -4.358 | 0.473  | 2.808 | 2.335 |
| 0.049 | 0.207 | -3.901 | 0.744  | 6.553 | 5.809 |
| 0.058 | 0.219 | -4.026 | 0.455  | 6.624 | 6.169 |
| 0.304 | 0.501 | -5.215 | 0.222  | 3.681 | 3.459 |
| 0.414 | 0.602 | -5.399 | 0.158  | 6.351 | 6.193 |
| 0.101 | 0.278 | -4.447 | 0.522  | 7.551 | 7.029 |
| 0.025 | 0.175 | -3.359 | -0.992 | 3.551 | 4.543 |
| 0.910 | 0.952 | -5.709 | 0.035  | 6.073 | 6.038 |
| 0.368 | 0.559 | -5.332 | 0.177  | 7.152 | 6.975 |
| 0.133 | 0.315 | -4.649 | -0.493 | 4.732 | 5.225 |
| 0.227 | 0.424 | -5.025 | -0.601 | 5.304 | 5.904 |
| 0.008 | 0.157 | -2.428 | -0.745 | 8.351 | 9.096 |
| 0.800 | 0.888 | -5.684 | -0.115 | 3.630 | 3.745 |
| 0.879 | 0.934 | -5.704 | -0.049 | 2.970 | 3.019 |
| 0.356 | 0.550 | -5.311 | -0.216 | 2.954 | 3.170 |
| 0.005 | 0.157 | -2.105 | -0.727 | 1.879 | 2.606 |
| 0.637 | 0.777 | -5.610 | -0.247 | 3.309 | 3.556 |
| 0.074 | 0.241 | -4.211 | -0.555 | 2.923 | 3.477 |
| 0.021 | 0.168 | -3.222 | -0.599 | 8.077 | 8.676 |
| 0.497 | 0.669 | -5.497 | -0.123 | 3.946 | 4.068 |
| 0.134 | 0.318 | -4.659 | 0.397  | 4.702 | 4.305 |
| 0.214 | 0.409 | -4.985 | 0.395  | 2.171 | 1.776 |
| 0.359 | 0.552 | -5.317 | -0.273 | 4.833 | 5.106 |
| 0.393 | 0.581 | -5.370 | 0.260  | 6.103 | 5.842 |
| 0.558 | 0.717 | -5.552 | 0.118  | 8.152 | 8.034 |
| 0.029 | 0.178 | -3.476 | -0.564 | 5.284 | 5.848 |
| 0.618 | 0.762 | -5.597 | -0.126 | 4.919 | 5.044 |
| 0.176 | 0.365 | -4.850 | -0.904 | 4.908 | 5.813 |
| 0.972 | 0.986 | -5.714 | -0.008 | 5.117 | 5.125 |

|       |       |        |        |       |       |
|-------|-------|--------|--------|-------|-------|
| 0.548 | 0.709 | -5.544 | -0.214 | 4.349 | 4.563 |
| 0.210 | 0.404 | -4.972 | -0.392 | 2.371 | 2.763 |
| 0.821 | 0.899 | -5.691 | 0.131  | 3.495 | 3.363 |
| 0.032 | 0.183 | -3.564 | -0.556 | 2.933 | 3.489 |
| 0.012 | 0.160 | -2.772 | -0.573 | 4.674 | 5.247 |
| 0.266 | 0.465 | -5.131 | -0.279 | 6.135 | 6.414 |
| 0.058 | 0.219 | -4.020 | 0.568  | 4.168 | 3.600 |
| 0.102 | 0.280 | -4.458 | 0.398  | 6.372 | 5.974 |
| 0.018 | 0.163 | -3.105 | 0.481  | 7.743 | 7.262 |
| 0.294 | 0.491 | -5.195 | 0.373  | 5.339 | 4.965 |
| 0.667 | 0.799 | -5.627 | -0.111 | 7.077 | 7.188 |
| 0.797 | 0.886 | -5.683 | -0.079 | 1.795 | 1.874 |
| 0.030 | 0.179 | -3.500 | -0.598 | 5.189 | 5.787 |
| 0.321 | 0.518 | -5.249 | 0.248  | 4.355 | 4.107 |
| 0.060 | 0.221 | -4.047 | 0.818  | 5.598 | 4.780 |
| 0.012 | 0.160 | -2.772 | -0.826 | 3.072 | 3.897 |
| 0.053 | 0.213 | -3.956 | -0.626 | 2.608 | 3.234 |
| 0.018 | 0.163 | -3.109 | -0.762 | 5.795 | 6.556 |
| 0.365 | 0.557 | -5.327 | -0.257 | 4.224 | 4.481 |
| 0.730 | 0.843 | -5.659 | 0.107  | 3.441 | 3.334 |
| 0.019 | 0.166 | -3.160 | 0.521  | 7.458 | 6.938 |
| 0.407 | 0.594 | -5.389 | 0.324  | 4.745 | 4.422 |
| 0.685 | 0.811 | -5.637 | -0.102 | 2.790 | 2.892 |
| 0.306 | 0.503 | -5.219 | 0.317  | 2.770 | 2.453 |
| 0.686 | 0.812 | -5.637 | -0.124 | 2.572 | 2.696 |
| 0.006 | 0.157 | -2.157 | 0.939  | 8.875 | 7.936 |
| 0.350 | 0.545 | -5.302 | 0.189  | 8.634 | 8.445 |
| 0.237 | 0.434 | -5.055 | -0.752 | 3.284 | 4.035 |
| 0.499 | 0.670 | -5.498 | -0.152 | 3.617 | 3.769 |
| 0.072 | 0.239 | -4.188 | 0.763  | 6.620 | 5.857 |
| 0.771 | 0.868 | -5.675 | -0.069 | 3.743 | 3.812 |
| 0.382 | 0.571 | -5.354 | -0.224 | 3.118 | 3.342 |
| 0.451 | 0.632 | -5.446 | 0.308  | 6.062 | 5.753 |
| 0.744 | 0.851 | -5.664 | -0.094 | 3.326 | 3.420 |
| 0.112 | 0.291 | -4.525 | -0.459 | 4.249 | 4.708 |
| 0.005 | 0.157 | -2.120 | -0.702 | 5.229 | 5.932 |
| 0.198 | 0.392 | -4.933 | 0.344  | 6.539 | 6.195 |
| 0.029 | 0.178 | -3.469 | 0.494  | 8.486 | 7.992 |
| 0.373 | 0.564 | -5.340 | -0.238 | 2.779 | 3.017 |
| 0.805 | 0.890 | -5.686 | 0.067  | 2.224 | 2.157 |
| 0.031 | 0.181 | -3.533 | 0.874  | 7.298 | 6.424 |
| 0.010 | 0.157 | -2.581 | 0.856  | 5.644 | 4.788 |
| 0.067 | 0.232 | -4.138 | 0.497  | 4.868 | 4.371 |
| 0.234 | 0.431 | -5.046 | 0.317  | 3.887 | 3.570 |
| 0.045 | 0.201 | -3.820 | -0.748 | 4.895 | 5.643 |
| 0.049 | 0.207 | -3.901 | -0.489 | 3.870 | 4.359 |
| 0.009 | 0.157 | -2.552 | -0.752 | 1.709 | 2.461 |
| 0.016 | 0.162 | -3.002 | -0.619 | 6.909 | 7.528 |
| 0.227 | 0.424 | -5.026 | 0.357  | 3.112 | 2.755 |
| 0.052 | 0.211 | -3.942 | 0.649  | 8.604 | 7.955 |

|       |       |        |        |        |        |
|-------|-------|--------|--------|--------|--------|
| 0.443 | 0.626 | -5.437 | 0.210  | 5.045  | 4.835  |
| 0.135 | 0.319 | -4.664 | 0.427  | 7.109  | 6.682  |
| 0.337 | 0.533 | -5.279 | 0.202  | 6.806  | 6.604  |
| 0.006 | 0.157 | -2.194 | 0.731  | 5.914  | 5.182  |
| 0.028 | 0.178 | -3.451 | 0.898  | 5.169  | 4.271  |
| 0.054 | 0.215 | -3.974 | 0.833  | 7.112  | 6.279  |
| 0.215 | 0.409 | -4.988 | 0.518  | 3.872  | 3.354  |
| 0.095 | 0.271 | -4.404 | 0.603  | 5.633  | 5.031  |
| 0.103 | 0.280 | -4.462 | 0.327  | 10.785 | 10.458 |
| 0.720 | 0.835 | -5.654 | 0.146  | 2.194  | 2.048  |
| 0.618 | 0.762 | -5.597 | -0.128 | 1.586  | 1.715  |
| 0.044 | 0.201 | -3.817 | 0.609  | 5.511  | 4.902  |
| 0.436 | 0.620 | -5.428 | 0.155  | 6.354  | 6.199  |
| 0.137 | 0.320 | -4.670 | 0.366  | 8.473  | 8.106  |
| 0.031 | 0.180 | -3.525 | 0.606  | 6.619  | 6.013  |
| 0.016 | 0.162 | -2.995 | 1.052  | 5.519  | 4.467  |
| 0.731 | 0.843 | -5.659 | -0.106 | 4.543  | 4.649  |
| 0.069 | 0.235 | -4.160 | 0.475  | 5.427  | 4.952  |
| 0.014 | 0.160 | -2.913 | 1.152  | 6.505  | 5.353  |
| 0.545 | 0.706 | -5.541 | 0.149  | 5.399  | 5.250  |
| 0.055 | 0.216 | -3.982 | -0.753 | 4.867  | 5.620  |
| 0.015 | 0.160 | -2.943 | -0.913 | 7.151  | 8.064  |
| 0.042 | 0.197 | -3.776 | -0.795 | 6.480  | 7.276  |
| 0.547 | 0.709 | -5.543 | -0.191 | 4.040  | 4.231  |
| 0.042 | 0.197 | -3.776 | -0.677 | 2.032  | 2.709  |
| 0.962 | 0.981 | -5.714 | 0.013  | 5.368  | 5.354  |
| 0.131 | 0.313 | -4.640 | 0.374  | 3.164  | 2.790  |
| 0.040 | 0.194 | -3.738 | 0.494  | 4.787  | 4.293  |
| 0.026 | 0.176 | -3.392 | 0.943  | 4.774  | 3.831  |
| 0.809 | 0.893 | -5.687 | 0.057  | 6.647  | 6.591  |
| 0.890 | 0.940 | -5.706 | -0.047 | 2.776  | 2.822  |
| 0.916 | 0.954 | -5.709 | 0.021  | 5.079  | 5.058  |
| 0.053 | 0.213 | -3.956 | 0.529  | 2.489  | 1.961  |
| 0.055 | 0.216 | -3.991 | -0.466 | 4.602  | 5.068  |
| 0.379 | 0.569 | -5.349 | -0.251 | 6.100  | 6.350  |
| 0.313 | 0.510 | -5.233 | 0.257  | 3.336  | 3.079  |
| 0.056 | 0.218 | -4.002 | 0.390  | 6.900  | 6.510  |
| 0.993 | 0.996 | -5.715 | -0.002 | 4.249  | 4.251  |
| 0.076 | 0.245 | -4.234 | 0.891  | 5.921  | 5.031  |
| 0.058 | 0.219 | -4.026 | 0.498  | 5.922  | 5.424  |
| 0.158 | 0.346 | -4.774 | -0.670 | 6.723  | 7.394  |
| 0.191 | 0.384 | -4.909 | 0.384  | 5.027  | 4.643  |
| 0.141 | 0.326 | -4.695 | 0.552  | 5.535  | 4.983  |
| 0.061 | 0.224 | -4.071 | 0.642  | 6.585  | 5.942  |
| 0.085 | 0.257 | -4.316 | 0.491  | 7.946  | 7.455  |
| 0.092 | 0.267 | -4.376 | -0.463 | 5.134  | 5.596  |
| 0.283 | 0.481 | -5.169 | 0.249  | 5.352  | 5.103  |
| 0.016 | 0.162 | -3.000 | 0.574  | 4.788  | 4.214  |
| 0.059 | 0.220 | -4.034 | 0.872  | 8.655  | 7.783  |
| 0.040 | 0.194 | -3.745 | -0.907 | 3.839  | 4.746  |

|       |       |        |        |        |        |
|-------|-------|--------|--------|--------|--------|
| 0.222 | 0.419 | -5.011 | -0.478 | 3.223  | 3.702  |
| 0.783 | 0.876 | -5.679 | -0.071 | 3.751  | 3.822  |
| 0.016 | 0.162 | -2.996 | -0.662 | 5.387  | 6.049  |
| 0.250 | 0.447 | -5.088 | 0.313  | 3.358  | 3.045  |
| 0.274 | 0.472 | -5.149 | -0.237 | 6.042  | 6.279  |
| 0.416 | 0.603 | -5.402 | 0.225  | 5.952  | 5.727  |
| 0.470 | 0.649 | -5.468 | 0.143  | 7.045  | 6.902  |
| 0.033 | 0.184 | -3.587 | -0.583 | 6.250  | 6.833  |
| 0.018 | 0.162 | -3.080 | 0.542  | 6.634  | 6.092  |
| 0.513 | 0.680 | -5.512 | 0.165  | 3.130  | 2.965  |
| 0.114 | 0.293 | -4.539 | 0.399  | 6.859  | 6.460  |
| 0.027 | 0.176 | -3.428 | 0.619  | 5.313  | 4.693  |
| 0.201 | 0.397 | -4.944 | -0.324 | 6.346  | 6.670  |
| 0.045 | 0.203 | -3.832 | -0.539 | 5.981  | 6.520  |
| 0.092 | 0.267 | -4.375 | 0.340  | 8.527  | 8.188  |
| 0.285 | 0.482 | -5.174 | -0.372 | 2.034  | 2.406  |
| 0.043 | 0.200 | -3.801 | -1.054 | 5.060  | 6.114  |
| 0.010 | 0.157 | -2.651 | -0.797 | 5.891  | 6.688  |
| 0.052 | 0.212 | -3.945 | -0.475 | 4.659  | 5.134  |
| 0.072 | 0.240 | -4.194 | 0.486  | 7.975  | 7.489  |
| 0.165 | 0.354 | -4.805 | -0.443 | 5.767  | 6.209  |
| 0.076 | 0.245 | -4.230 | 0.417  | 2.559  | 2.142  |
| 0.006 | 0.157 | -2.174 | 0.606  | 5.770  | 5.164  |
| 0.143 | 0.327 | -4.703 | -0.396 | 3.965  | 4.360  |
| 0.232 | 0.429 | -5.041 | 0.590  | 5.669  | 5.079  |
| 0.409 | 0.597 | -5.393 | 0.163  | 10.202 | 10.038 |
| 0.271 | 0.469 | -5.142 | 0.227  | 9.122  | 8.895  |
| 0.709 | 0.827 | -5.649 | -0.101 | 2.442  | 2.543  |
| 0.004 | 0.157 | -1.828 | 1.368  | 9.385  | 8.016  |
| 0.017 | 0.162 | -3.062 | 1.325  | 8.072  | 6.748  |
| 0.056 | 0.216 | -3.992 | 1.203  | 6.114  | 4.912  |
| 0.052 | 0.211 | -3.938 | 0.471  | 8.269  | 7.798  |
| 0.340 | 0.535 | -5.284 | 0.269  | 2.639  | 2.370  |
| 0.418 | 0.605 | -5.404 | -0.254 | 1.700  | 1.954  |
| 0.039 | 0.192 | -3.711 | 0.434  | 9.177  | 8.742  |
| 0.065 | 0.229 | -4.118 | 0.401  | 10.843 | 10.442 |
| 0.734 | 0.845 | -5.660 | 0.073  | 5.508  | 5.435  |
| 0.770 | 0.868 | -5.674 | 0.093  | 3.570  | 3.476  |
| 0.209 | 0.404 | -4.969 | 0.270  | 9.406  | 9.136  |
| 0.212 | 0.408 | -4.981 | 0.258  | 10.041 | 9.784  |
| 0.260 | 0.458 | -5.116 | -0.259 | 9.107  | 9.366  |
| 0.029 | 0.178 | -3.494 | 0.727  | 8.679  | 7.952  |
| 0.041 | 0.195 | -3.759 | 0.550  | 9.386  | 8.836  |
| 0.010 | 0.157 | -2.639 | 0.771  | 9.217  | 8.446  |
| 0.015 | 0.161 | -2.962 | 0.507  | 6.070  | 5.563  |
| 0.010 | 0.157 | -2.625 | 0.777  | 8.069  | 7.292  |
| 0.382 | 0.571 | -5.353 | 0.259  | 4.347  | 4.088  |
| 0.599 | 0.749 | -5.584 | -0.120 | 9.153  | 9.273  |
| 0.140 | 0.324 | -4.686 | 0.854  | 8.025  | 7.171  |
| 0.072 | 0.240 | -4.194 | 0.649  | 4.823  | 4.174  |

|       |       |        |        |        |       |
|-------|-------|--------|--------|--------|-------|
| 0.200 | 0.395 | -4.939 | -0.397 | 3.908  | 4.305 |
| 0.374 | 0.565 | -5.341 | 0.167  | 7.041  | 6.873 |
| 0.364 | 0.555 | -5.324 | 0.190  | 5.660  | 5.469 |
| 0.477 | 0.654 | -5.475 | 0.141  | 7.441  | 7.299 |
| 0.008 | 0.157 | -2.469 | 1.478  | 9.943  | 8.465 |
| 0.674 | 0.804 | -5.631 | -0.130 | 3.038  | 3.168 |
| 0.041 | 0.195 | -3.750 | 0.668  | 7.860  | 7.191 |
| 0.119 | 0.299 | -4.570 | 0.363  | 8.762  | 8.398 |
| 0.549 | 0.710 | -5.545 | -0.177 | 2.021  | 2.198 |
| 0.224 | 0.420 | -5.015 | -0.370 | 2.883  | 3.253 |
| 0.040 | 0.194 | -3.743 | 0.448  | 7.386  | 6.938 |
| 0.464 | 0.644 | -5.461 | 0.219  | 5.990  | 5.770 |
| 0.357 | 0.551 | -5.314 | -0.345 | 2.593  | 2.938 |
| 0.392 | 0.580 | -5.368 | 0.201  | 7.667  | 7.466 |
| 0.819 | 0.897 | -5.690 | 0.057  | 4.544  | 4.488 |
| 0.018 | 0.163 | -3.109 | 1.148  | 6.503  | 5.355 |
| 0.010 | 0.157 | -2.643 | 0.846  | 8.352  | 7.506 |
| 0.106 | 0.284 | -4.486 | -0.554 | 5.865  | 6.418 |
| 0.017 | 0.162 | -3.029 | 0.683  | 7.408  | 6.725 |
| 0.098 | 0.275 | -4.428 | 0.561  | 3.422  | 2.861 |
| 0.076 | 0.245 | -4.232 | -0.482 | 4.047  | 4.530 |
| 0.021 | 0.169 | -3.236 | 1.175  | 6.523  | 5.348 |
| 0.155 | 0.343 | -4.762 | 0.387  | 2.808  | 2.421 |
| 0.630 | 0.771 | -5.605 | -0.123 | 4.141  | 4.264 |
| 0.035 | 0.186 | -3.631 | 0.469  | 7.952  | 7.484 |
| 0.048 | 0.205 | -3.879 | 1.103  | 7.609  | 6.507 |
| 0.632 | 0.772 | -5.606 | -0.132 | 3.755  | 3.887 |
| 0.022 | 0.169 | -3.249 | 0.849  | 3.408  | 2.559 |
| 0.244 | 0.442 | -5.074 | 0.331  | 3.158  | 2.827 |
| 0.079 | 0.249 | -4.259 | 0.447  | 2.808  | 2.361 |
| 0.022 | 0.171 | -3.269 | -0.730 | 7.180  | 7.910 |
| 0.183 | 0.374 | -4.879 | -0.385 | 3.535  | 3.921 |
| 0.351 | 0.546 | -5.304 | -0.279 | 2.764  | 3.043 |
| 0.134 | 0.317 | -4.655 | -0.421 | 2.141  | 2.562 |
| 0.554 | 0.714 | -5.549 | -0.158 | 4.804  | 4.962 |
| 0.618 | 0.762 | -5.597 | -0.176 | 5.244  | 5.420 |
| 0.013 | 0.160 | -2.848 | 0.655  | 5.981  | 5.327 |
| 0.064 | 0.228 | -4.102 | 0.723  | 5.860  | 5.137 |
| 0.074 | 0.242 | -4.212 | 0.552  | 6.111  | 5.559 |
| 0.030 | 0.179 | -3.510 | 0.688  | 8.665  | 7.976 |
| 0.039 | 0.192 | -3.708 | 0.767  | 5.919  | 5.152 |
| 0.143 | 0.327 | -4.702 | 0.411  | 4.675  | 4.264 |
| 0.860 | 0.925 | -5.700 | 0.049  | 3.434  | 3.386 |
| 0.113 | 0.292 | -4.533 | 0.630  | 6.339  | 5.709 |
| 0.009 | 0.157 | -2.579 | -0.874 | 5.024  | 5.897 |
| 0.014 | 0.160 | -2.879 | 0.715  | 6.947  | 6.233 |
| 0.409 | 0.596 | -5.392 | -0.211 | 4.068  | 4.279 |
| 0.408 | 0.596 | -5.391 | 0.206  | 1.475  | 1.269 |
| 0.014 | 0.160 | -2.881 | 1.245  | 10.034 | 8.789 |
| 0.805 | 0.890 | -5.686 | 0.070  | 3.443  | 3.373 |

|       |       |        |        |       |       |
|-------|-------|--------|--------|-------|-------|
| 0.352 | 0.547 | -5.306 | -0.243 | 3.783 | 4.026 |
| 0.125 | 0.306 | -4.606 | -0.421 | 4.350 | 4.771 |
| 0.024 | 0.173 | -3.335 | -0.563 | 7.109 | 7.672 |
| 0.178 | 0.368 | -4.857 | -0.358 | 3.421 | 3.779 |
| 0.860 | 0.925 | -5.700 | -0.049 | 5.640 | 5.689 |
| 0.014 | 0.160 | -2.915 | 0.599  | 7.720 | 7.121 |
| 0.008 | 0.157 | -2.413 | -0.676 | 5.325 | 6.001 |
| 0.144 | 0.327 | -4.706 | -0.403 | 6.409 | 6.812 |
| 0.817 | 0.897 | -5.690 | 0.055  | 3.996 | 3.941 |
| 0.003 | 0.157 | -1.626 | -0.960 | 5.673 | 6.633 |
| 0.153 | 0.340 | -4.751 | 0.371  | 4.883 | 4.511 |
| 0.402 | 0.589 | -5.382 | 0.235  | 6.262 | 6.026 |
| 0.015 | 0.160 | -2.958 | 0.589  | 3.463 | 2.873 |
| 0.185 | 0.376 | -4.884 | -0.371 | 2.985 | 3.357 |
| 0.009 | 0.157 | -2.492 | 1.405  | 6.108 | 4.703 |
| 0.003 | 0.157 | -1.640 | 1.469  | 5.043 | 3.574 |
| 0.050 | 0.208 | -3.917 | -0.467 | 5.999 | 6.466 |
| 0.425 | 0.610 | -5.413 | 0.352  | 3.274 | 2.921 |
| 0.629 | 0.770 | -5.604 | 0.121  | 3.881 | 3.760 |
| 0.923 | 0.959 | -5.710 | 0.028  | 7.762 | 7.734 |
| 0.107 | 0.285 | -4.489 | -0.534 | 2.443 | 2.977 |
| 0.138 | 0.321 | -4.677 | 0.389  | 6.328 | 5.939 |
| 0.084 | 0.256 | -4.312 | -0.431 | 3.635 | 4.066 |
| 0.037 | 0.190 | -3.678 | 0.746  | 2.970 | 2.224 |
| 0.371 | 0.562 | -5.337 | -0.249 | 5.036 | 5.285 |
| 0.802 | 0.889 | -5.685 | 0.066  | 4.394 | 4.329 |
| 0.117 | 0.297 | -4.556 | 0.349  | 5.102 | 4.753 |
| 0.083 | 0.255 | -4.299 | -0.458 | 3.780 | 4.238 |
| 0.154 | 0.341 | -4.758 | -0.399 | 3.334 | 3.734 |
| 0.162 | 0.351 | -4.791 | 0.365  | 3.860 | 3.495 |
| 0.128 | 0.308 | -4.620 | 0.534  | 3.237 | 2.703 |
| 0.050 | 0.207 | -3.907 | 0.580  | 3.267 | 2.688 |
| 0.272 | 0.471 | -5.145 | 0.316  | 5.126 | 4.810 |
| 0.087 | 0.261 | -4.339 | 0.602  | 7.007 | 6.404 |
| 0.229 | 0.426 | -5.030 | -0.601 | 5.967 | 6.568 |
| 0.565 | 0.722 | -5.558 | 0.238  | 2.994 | 2.756 |
| 0.055 | 0.216 | -3.990 | 0.850  | 9.563 | 8.714 |
| 0.370 | 0.560 | -5.334 | 0.260  | 5.206 | 4.946 |
| 0.031 | 0.181 | -3.532 | 0.782  | 5.805 | 5.023 |
| 0.109 | 0.288 | -4.506 | 0.511  | 7.074 | 6.563 |
| 0.753 | 0.857 | -5.668 | -0.098 | 3.019 | 3.117 |
| 0.250 | 0.448 | -5.090 | 0.325  | 6.465 | 6.140 |
| 0.368 | 0.559 | -5.331 | 0.240  | 3.050 | 2.810 |
| 0.495 | 0.667 | -5.494 | -0.148 | 3.067 | 3.215 |
| 0.053 | 0.214 | -3.962 | 0.505  | 7.467 | 6.962 |
| 0.022 | 0.169 | -3.242 | -0.574 | 7.495 | 8.069 |
| 0.257 | 0.455 | -5.109 | 0.266  | 3.174 | 2.907 |
| 0.066 | 0.230 | -4.125 | 0.616  | 4.955 | 4.339 |
| 0.095 | 0.271 | -4.401 | -0.541 | 4.366 | 4.907 |
| 0.587 | 0.740 | -5.575 | -0.188 | 3.585 | 3.774 |

|       |       |        |        |       |       |
|-------|-------|--------|--------|-------|-------|
| 0.709 | 0.827 | -5.649 | 0.098  | 2.838 | 2.740 |
| 0.095 | 0.271 | -4.402 | -0.743 | 2.580 | 3.323 |
| 0.088 | 0.263 | -4.349 | -0.848 | 3.368 | 4.216 |
| 0.280 | 0.478 | -5.163 | 0.267  | 4.511 | 4.243 |
| 0.728 | 0.840 | -5.657 | -0.083 | 6.914 | 6.997 |
| 0.284 | 0.482 | -5.173 | 0.347  | 3.685 | 3.338 |
| 0.571 | 0.726 | -5.563 | 0.228  | 4.133 | 3.905 |
| 0.217 | 0.412 | -4.995 | 0.808  | 2.981 | 2.173 |
| 0.171 | 0.361 | -4.831 | 0.545  | 4.574 | 4.029 |
| 0.105 | 0.283 | -4.475 | -0.520 | 3.970 | 4.489 |
| 0.104 | 0.281 | -4.469 | -0.386 | 4.465 | 4.851 |
| 0.009 | 0.157 | -2.552 | -0.934 | 2.388 | 3.322 |
| 0.012 | 0.160 | -2.775 | 0.767  | 5.589 | 4.822 |
| 0.027 | 0.176 | -3.423 | 0.466  | 9.477 | 9.011 |
| 0.310 | 0.507 | -5.227 | 0.219  | 6.435 | 6.215 |
| 0.215 | 0.409 | -4.988 | 0.420  | 4.159 | 3.739 |
| 0.632 | 0.772 | -5.606 | -0.183 | 2.908 | 3.091 |
| 0.225 | 0.422 | -5.020 | -0.376 | 2.631 | 3.007 |
| 0.048 | 0.205 | -3.884 | -0.512 | 3.402 | 3.914 |
| 0.001 | 0.157 | -0.904 | -1.468 | 5.365 | 6.833 |
| 0.384 | 0.572 | -5.356 | 0.244  | 4.633 | 4.389 |
| 0.081 | 0.253 | -4.285 | 0.352  | 7.638 | 7.286 |
| 0.618 | 0.762 | -5.597 | 0.099  | 6.840 | 6.741 |
| 0.127 | 0.308 | -4.617 | 0.431  | 2.958 | 2.527 |
| 0.654 | 0.790 | -5.620 | -0.089 | 2.013 | 2.103 |
| 0.119 | 0.298 | -4.567 | 0.535  | 7.907 | 7.372 |
| 0.016 | 0.162 | -3.025 | 0.998  | 7.018 | 6.020 |
| 0.387 | 0.575 | -5.360 | 0.253  | 7.029 | 6.776 |
| 0.186 | 0.378 | -4.889 | 0.302  | 4.789 | 4.487 |
| 0.992 | 0.996 | -5.715 | 0.002  | 5.238 | 5.235 |
| 0.336 | 0.532 | -5.276 | 0.247  | 7.329 | 7.082 |
| 0.193 | 0.386 | -4.915 | 0.297  | 6.187 | 5.890 |
| 0.027 | 0.177 | -3.435 | 1.220  | 7.169 | 5.949 |
| 0.085 | 0.257 | -4.319 | 0.515  | 3.284 | 2.770 |
| 0.555 | 0.715 | -5.550 | -0.161 | 2.589 | 2.751 |
| 0.472 | 0.650 | -5.470 | 0.204  | 5.441 | 5.237 |
| 0.042 | 0.197 | -3.771 | 0.493  | 6.565 | 6.072 |
| 0.382 | 0.571 | -5.353 | 0.288  | 4.872 | 4.585 |
| 0.309 | 0.507 | -5.226 | -0.272 | 2.138 | 2.410 |
| 0.635 | 0.774 | -5.608 | -0.134 | 2.566 | 2.700 |
| 0.340 | 0.535 | -5.284 | -0.331 | 2.477 | 2.808 |
| 0.098 | 0.275 | -4.426 | -0.387 | 6.778 | 7.165 |
| 0.013 | 0.160 | -2.856 | 0.663  | 5.379 | 4.716 |
| 0.252 | 0.450 | -5.094 | -0.344 | 4.763 | 5.107 |
| 0.049 | 0.207 | -3.902 | 0.527  | 6.851 | 6.325 |
| 0.915 | 0.954 | -5.709 | -0.030 | 7.172 | 7.202 |
| 0.361 | 0.553 | -5.320 | -0.259 | 3.146 | 3.405 |
| 0.133 | 0.316 | -4.652 | -0.557 | 3.534 | 4.091 |
| 0.100 | 0.277 | -4.440 | 0.334  | 8.084 | 7.751 |
| 0.004 | 0.157 | -1.959 | -1.156 | 5.414 | 6.570 |

|       |       |        |        |       |       |
|-------|-------|--------|--------|-------|-------|
| 0.017 | 0.162 | -3.046 | -0.890 | 2.238 | 3.128 |
| 0.026 | 0.176 | -3.397 | 0.866  | 5.392 | 4.526 |
| 0.003 | 0.157 | -1.756 | 0.950  | 4.911 | 3.961 |
| 0.093 | 0.269 | -4.387 | 0.832  | 6.242 | 5.410 |
| 0.006 | 0.157 | -2.253 | -1.492 | 1.762 | 3.253 |
| 0.760 | 0.862 | -5.671 | -0.089 | 4.509 | 4.598 |
| 0.045 | 0.203 | -3.835 | -0.591 | 2.274 | 2.865 |
| 0.033 | 0.184 | -3.576 | -1.001 | 3.055 | 4.056 |
| 0.757 | 0.860 | -5.670 | -0.083 | 3.067 | 3.150 |
| 0.004 | 0.157 | -1.907 | 0.928  | 2.975 | 2.046 |
| 0.111 | 0.290 | -4.518 | -0.540 | 3.321 | 3.861 |
| 0.031 | 0.180 | -3.523 | -0.667 | 3.574 | 4.240 |
| 0.447 | 0.629 | -5.441 | 0.200  | 5.847 | 5.646 |
| 0.032 | 0.182 | -3.556 | -0.931 | 3.885 | 4.816 |
| 0.022 | 0.171 | -3.270 | -0.609 | 4.600 | 5.209 |
| 0.065 | 0.229 | -4.114 | -0.621 | 3.159 | 3.779 |
| 0.111 | 0.290 | -4.521 | -0.708 | 3.089 | 3.796 |
| 0.997 | 0.999 | -5.715 | -0.001 | 3.043 | 3.044 |
| 0.013 | 0.160 | -2.830 | 0.647  | 4.504 | 3.857 |
| 0.129 | 0.311 | -4.630 | 0.382  | 4.724 | 4.342 |
| 0.015 | 0.160 | -2.952 | 2.178  | 7.509 | 5.331 |
| 0.563 | 0.721 | -5.556 | -0.266 | 1.167 | 1.432 |
| 0.028 | 0.177 | -3.444 | 0.701  | 3.035 | 2.333 |
| 0.125 | 0.306 | -4.603 | 0.613  | 2.756 | 2.143 |
| 0.033 | 0.184 | -3.580 | 0.413  | 6.804 | 6.391 |
| 0.482 | 0.658 | -5.480 | 0.171  | 6.588 | 6.418 |
| 0.023 | 0.173 | -3.289 | 0.495  | 5.464 | 4.970 |
| 0.426 | 0.612 | -5.415 | 0.189  | 4.487 | 4.299 |
| 0.690 | 0.815 | -5.639 | -0.148 | 2.564 | 2.712 |
| 0.004 | 0.157 | -1.799 | -0.779 | 4.112 | 4.891 |
| 0.340 | 0.535 | -5.285 | 0.282  | 6.479 | 6.197 |
| 0.130 | 0.311 | -4.633 | 0.404  | 3.343 | 2.939 |
| 0.043 | 0.200 | -3.796 | 0.488  | 4.663 | 4.175 |
| 0.003 | 0.157 | -1.626 | 1.492  | 4.744 | 3.252 |
| 0.273 | 0.471 | -5.148 | 0.351  | 5.947 | 5.596 |
| 0.123 | 0.304 | -4.591 | 0.626  | 3.775 | 3.149 |
| 0.352 | 0.547 | -5.305 | 0.219  | 3.690 | 3.471 |
| 0.176 | 0.366 | -4.851 | -0.312 | 3.284 | 3.596 |
| 0.720 | 0.835 | -5.654 | 0.107  | 6.313 | 6.206 |
| 0.130 | 0.311 | -4.632 | 0.454  | 5.459 | 5.005 |
| 0.908 | 0.950 | -5.708 | -0.033 | 4.951 | 4.984 |
| 0.306 | 0.503 | -5.219 | 0.219  | 6.278 | 6.059 |
| 0.116 | 0.296 | -4.552 | 0.355  | 7.756 | 7.401 |
| 0.025 | 0.175 | -3.369 | 0.532  | 5.890 | 5.359 |
| 0.991 | 0.995 | -5.715 | -0.003 | 7.595 | 7.598 |
| 0.066 | 0.231 | -4.127 | 0.548  | 6.195 | 5.647 |
| 0.799 | 0.887 | -5.684 | -0.066 | 4.253 | 4.320 |
| 0.118 | 0.298 | -4.562 | 0.386  | 3.541 | 3.156 |
| 0.354 | 0.548 | -5.308 | 0.232  | 5.046 | 4.813 |
| 0.554 | 0.714 | -5.549 | 0.185  | 3.491 | 3.306 |



|       |       |        |        |       |       |
|-------|-------|--------|--------|-------|-------|
| 0.424 | 0.610 | -5.413 | 0.194  | 2.635 | 2.441 |
| 0.056 | 0.217 | -3.995 | 0.622  | 5.487 | 4.866 |
| 0.184 | 0.375 | -4.881 | 0.358  | 3.829 | 3.471 |
| 0.610 | 0.756 | -5.591 | -0.135 | 5.928 | 6.063 |
| 0.135 | 0.318 | -4.661 | 0.378  | 6.163 | 5.785 |
| 0.070 | 0.236 | -4.166 | 0.640  | 3.691 | 3.051 |
| 0.589 | 0.741 | -5.576 | -0.150 | 4.972 | 5.121 |
| 0.284 | 0.482 | -5.173 | 0.252  | 4.000 | 3.748 |
| 0.061 | 0.223 | -4.059 | 0.415  | 6.588 | 6.173 |
| 0.740 | 0.849 | -5.663 | -0.119 | 3.185 | 3.304 |
| 0.182 | 0.374 | -4.875 | -0.420 | 4.023 | 4.443 |
| 0.049 | 0.207 | -3.893 | 0.439  | 4.610 | 4.171 |
| 0.932 | 0.963 | -5.711 | 0.027  | 3.162 | 3.135 |
| 0.497 | 0.669 | -5.496 | 0.184  | 4.001 | 3.817 |
| 0.712 | 0.828 | -5.650 | 0.123  | 2.201 | 2.078 |
| 0.414 | 0.602 | -5.399 | -0.204 | 2.488 | 2.692 |
| 0.071 | 0.238 | -4.182 | -0.771 | 3.606 | 4.377 |
| 0.208 | 0.403 | -4.967 | -0.407 | 3.139 | 3.546 |
| 0.252 | 0.450 | -5.096 | -0.318 | 2.502 | 2.820 |
| 0.316 | 0.514 | -5.239 | 0.302  | 2.547 | 2.245 |
| 0.135 | 0.318 | -4.660 | -0.405 | 3.945 | 4.349 |
| 0.800 | 0.888 | -5.684 | -0.067 | 2.397 | 2.464 |
| 0.237 | 0.434 | -5.053 | -0.345 | 5.961 | 6.307 |
| 0.987 | 0.993 | -5.715 | 0.005  | 2.571 | 2.566 |
| 0.003 | 0.157 | -1.532 | 2.059  | 7.929 | 5.869 |
| 0.333 | 0.529 | -5.271 | -0.430 | 1.147 | 1.578 |
| 0.566 | 0.723 | -5.559 | -0.279 | 4.732 | 5.011 |
| 0.992 | 0.996 | -5.715 | -0.005 | 3.997 | 4.003 |
| 0.733 | 0.844 | -5.660 | 0.103  | 3.162 | 3.060 |
| 0.046 | 0.203 | -3.839 | -0.628 | 5.232 | 5.860 |
| 0.073 | 0.241 | -4.206 | 0.498  | 6.360 | 5.862 |
| 0.085 | 0.257 | -4.317 | 0.483  | 4.360 | 3.877 |
| 0.644 | 0.782 | -5.614 | 0.129  | 2.905 | 2.776 |
| 0.033 | 0.184 | -3.592 | -0.553 | 2.131 | 2.684 |
| 0.896 | 0.943 | -5.707 | -0.037 | 3.148 | 3.185 |
| 0.361 | 0.553 | -5.320 | 0.305  | 4.970 | 4.665 |
| 0.082 | 0.253 | -4.290 | -0.409 | 3.923 | 4.332 |
| 0.083 | 0.255 | -4.302 | -0.552 | 5.207 | 5.759 |
| 0.144 | 0.328 | -4.708 | 0.434  | 4.131 | 3.697 |
| 0.983 | 0.991 | -5.715 | 0.005  | 4.244 | 4.240 |
| 0.495 | 0.667 | -5.494 | -0.354 | 1.644 | 1.998 |
| 0.680 | 0.808 | -5.634 | -0.112 | 2.146 | 2.257 |
| 0.421 | 0.607 | -5.408 | 0.213  | 4.465 | 4.252 |
| 0.203 | 0.398 | -4.951 | -0.558 | 2.633 | 3.191 |
| 0.530 | 0.695 | -5.528 | -0.320 | 5.960 | 6.280 |
| 0.539 | 0.701 | -5.536 | -0.288 | 6.380 | 6.668 |
| 0.245 | 0.442 | -5.076 | -0.415 | 3.654 | 4.069 |
| 0.679 | 0.808 | -5.634 | 0.146  | 5.412 | 5.266 |
| 0.015 | 0.160 | -2.932 | 2.132  | 8.558 | 6.426 |
| 0.473 | 0.652 | -5.471 | -0.235 | 1.814 | 2.049 |

|       |       |        |        |       |       |
|-------|-------|--------|--------|-------|-------|
| 0.063 | 0.227 | -4.095 | 0.880  | 5.923 | 5.043 |
| 0.606 | 0.754 | -5.589 | -0.155 | 3.276 | 3.431 |
| 0.803 | 0.890 | -5.685 | 0.065  | 2.303 | 2.238 |
| 0.186 | 0.378 | -4.890 | 0.438  | 3.862 | 3.425 |
| 0.457 | 0.637 | -5.452 | 0.214  | 3.866 | 3.652 |
| 0.201 | 0.397 | -4.944 | 0.393  | 5.183 | 4.790 |
| 0.703 | 0.823 | -5.646 | -0.109 | 3.363 | 3.472 |
| 0.724 | 0.838 | -5.656 | -0.103 | 3.460 | 3.563 |
| 0.733 | 0.844 | -5.660 | -0.096 | 3.440 | 3.536 |
| 0.758 | 0.860 | -5.670 | -0.086 | 3.506 | 3.592 |
| 0.821 | 0.899 | -5.691 | 0.075  | 3.546 | 3.470 |
| 0.265 | 0.464 | -5.129 | -0.287 | 3.088 | 3.375 |
| 0.843 | 0.913 | -5.696 | 0.052  | 2.764 | 2.712 |
| 0.049 | 0.206 | -3.888 | 0.832  | 4.203 | 3.372 |
| 0.528 | 0.693 | -5.526 | -0.153 | 2.354 | 2.507 |
| 0.776 | 0.871 | -5.676 | -0.095 | 3.254 | 3.349 |
| 0.089 | 0.264 | -4.354 | -1.275 | 2.327 | 3.601 |
| 0.496 | 0.668 | -5.495 | -0.197 | 2.732 | 2.929 |
| 0.054 | 0.215 | -3.975 | -0.654 | 3.163 | 3.817 |
| 0.006 | 0.157 | -2.260 | -0.660 | 3.304 | 3.964 |
| 0.017 | 0.162 | -3.045 | -1.035 | 3.705 | 4.739 |
| 0.088 | 0.262 | -4.345 | 0.734  | 3.585 | 2.851 |
| 0.393 | 0.581 | -5.370 | -0.236 | 4.870 | 5.106 |
| 0.074 | 0.242 | -4.214 | -0.488 | 3.100 | 3.588 |
| 0.126 | 0.307 | -4.613 | -0.522 | 2.794 | 3.316 |
| 0.143 | 0.327 | -4.704 | -0.297 | 6.339 | 6.636 |
| 0.642 | 0.780 | -5.613 | 0.116  | 3.627 | 3.511 |
| 0.142 | 0.326 | -4.700 | 0.305  | 7.363 | 7.057 |
| 0.040 | 0.194 | -3.734 | 0.650  | 3.802 | 3.152 |
| 0.673 | 0.803 | -5.630 | -0.106 | 2.722 | 2.828 |
| 0.179 | 0.369 | -4.861 | 0.436  | 3.761 | 3.325 |
| 0.032 | 0.183 | -3.570 | -0.672 | 4.941 | 5.613 |
| 0.230 | 0.427 | -5.034 | 0.253  | 5.463 | 5.210 |
| 0.660 | 0.793 | -5.623 | 0.109  | 5.888 | 5.778 |
| 0.030 | 0.179 | -3.509 | 1.311  | 6.255 | 4.945 |
| 0.198 | 0.393 | -4.934 | -0.428 | 3.265 | 3.694 |
| 0.070 | 0.236 | -4.167 | -0.472 | 2.464 | 2.936 |
| 0.036 | 0.189 | -3.662 | -0.972 | 7.427 | 8.400 |
| 0.430 | 0.616 | -5.420 | -0.263 | 3.057 | 3.320 |
| 0.100 | 0.277 | -4.443 | 0.413  | 5.816 | 5.404 |
| 0.895 | 0.943 | -5.707 | 0.032  | 5.642 | 5.610 |
| 0.004 | 0.157 | -1.771 | 0.666  | 2.994 | 2.328 |
| 0.822 | 0.899 | -5.691 | -0.060 | 3.929 | 3.989 |
| 0.192 | 0.385 | -4.912 | -0.320 | 4.408 | 4.728 |
| 0.111 | 0.290 | -4.519 | 0.428  | 3.147 | 2.719 |
| 0.004 | 0.157 | -1.850 | 2.268  | 6.313 | 4.045 |
| 0.348 | 0.543 | -5.297 | -0.409 | 5.635 | 6.044 |
| 0.353 | 0.548 | -5.307 | -0.414 | 5.917 | 6.331 |
| 0.250 | 0.448 | -5.091 | -0.507 | 5.731 | 6.238 |
| 0.271 | 0.469 | -5.142 | -0.493 | 5.841 | 6.334 |

|       |       |        |        |       |       |
|-------|-------|--------|--------|-------|-------|
| 0.280 | 0.478 | -5.163 | -0.490 | 5.851 | 6.341 |
| 0.292 | 0.489 | -5.189 | -0.483 | 5.847 | 6.330 |
| 0.354 | 0.548 | -5.308 | -0.411 | 5.950 | 6.361 |
| 0.356 | 0.550 | -5.313 | -0.367 | 5.306 | 5.673 |
| 0.405 | 0.593 | -5.387 | -0.340 | 5.413 | 5.753 |
| 0.022 | 0.171 | -3.273 | 0.662  | 2.597 | 1.935 |
| 0.020 | 0.167 | -3.203 | -0.632 | 3.587 | 4.219 |
| 0.126 | 0.306 | -4.609 | -0.477 | 2.317 | 2.794 |
| 0.123 | 0.304 | -4.593 | 0.632  | 3.978 | 3.346 |
| 0.190 | 0.383 | -4.905 | -0.407 | 3.642 | 4.049 |
| 0.690 | 0.815 | -5.640 | 0.260  | 3.690 | 3.431 |
| 0.745 | 0.852 | -5.665 | 0.130  | 2.684 | 2.554 |
| 0.117 | 0.297 | -4.558 | 0.360  | 6.521 | 6.161 |
| 0.907 | 0.950 | -5.708 | 0.069  | 3.170 | 3.102 |
| 0.785 | 0.878 | -5.680 | 0.076  | 5.341 | 5.265 |
| 0.000 | 0.157 | 0.955  | 1.027  | 3.034 | 2.007 |
| 0.003 | 0.157 | -1.510 | -0.799 | 2.078 | 2.877 |
| 0.340 | 0.535 | -5.284 | 0.402  | 4.802 | 4.400 |
| 0.844 | 0.914 | -5.697 | 0.055  | 3.547 | 3.492 |
| 0.327 | 0.523 | -5.261 | -0.261 | 2.765 | 3.025 |
| 0.167 | 0.356 | -4.813 | -0.713 | 3.296 | 4.009 |
| 0.154 | 0.341 | -4.756 | 0.314  | 7.341 | 7.026 |
| 0.136 | 0.319 | -4.665 | 0.333  | 6.149 | 5.816 |
| 0.025 | 0.175 | -3.371 | 0.927  | 6.230 | 5.303 |
| 0.202 | 0.397 | -4.946 | 0.494  | 3.619 | 3.125 |
| 0.414 | 0.602 | -5.399 | 0.210  | 5.561 | 5.351 |
| 0.232 | 0.429 | -5.041 | 0.393  | 2.461 | 2.068 |
| 0.100 | 0.277 | -4.441 | -0.380 | 7.953 | 8.333 |
| 0.102 | 0.279 | -4.454 | -0.392 | 6.453 | 6.845 |
| 0.111 | 0.290 | -4.517 | -0.387 | 6.887 | 7.274 |
| 0.111 | 0.290 | -4.517 | -0.327 | 6.664 | 6.991 |
| 0.123 | 0.304 | -4.595 | -0.390 | 6.686 | 7.076 |
| 0.172 | 0.362 | -4.835 | -0.276 | 6.670 | 6.946 |
| 0.180 | 0.371 | -4.866 | 0.353  | 4.522 | 4.169 |
| 0.591 | 0.743 | -5.578 | 0.173  | 4.877 | 4.704 |
| 0.023 | 0.173 | -3.294 | 0.918  | 4.900 | 3.982 |
| 0.282 | 0.480 | -5.167 | -0.308 | 2.373 | 2.681 |
| 0.611 | 0.757 | -5.592 | -0.169 | 1.264 | 1.433 |
| 0.082 | 0.253 | -4.289 | 0.477  | 6.125 | 5.648 |
| 0.228 | 0.424 | -5.027 | -0.379 | 3.134 | 3.513 |
| 0.055 | 0.216 | -3.991 | 0.534  | 3.728 | 3.194 |
| 0.681 | 0.808 | -5.634 | 0.104  | 2.788 | 2.684 |
| 0.870 | 0.929 | -5.702 | -0.093 | 1.719 | 1.812 |
| 0.181 | 0.372 | -4.870 | -0.375 | 2.423 | 2.798 |
| 0.627 | 0.768 | -5.603 | 0.147  | 3.010 | 2.864 |
| 0.033 | 0.184 | -3.586 | -0.546 | 5.254 | 5.800 |
| 0.210 | 0.405 | -4.974 | -0.468 | 3.091 | 3.560 |
| 0.898 | 0.944 | -5.707 | -0.025 | 5.830 | 5.855 |
| 0.012 | 0.160 | -2.789 | -0.648 | 2.158 | 2.806 |
| 0.165 | 0.354 | -4.806 | -0.396 | 3.425 | 3.821 |

|       |       |        |        |       |       |
|-------|-------|--------|--------|-------|-------|
| 0.550 | 0.710 | -5.545 | -0.329 | 1.888 | 2.217 |
| 0.034 | 0.185 | -3.606 | 0.837  | 4.084 | 3.247 |
| 0.028 | 0.178 | -3.463 | -0.498 | 4.667 | 5.165 |
| 0.605 | 0.753 | -5.588 | -0.152 | 2.178 | 2.330 |
| 0.120 | 0.301 | -4.578 | 0.485  | 4.116 | 3.631 |
| 0.044 | 0.201 | -3.813 | -0.595 | 2.786 | 3.381 |
| 0.358 | 0.551 | -5.315 | 0.229  | 5.041 | 4.812 |
| 0.774 | 0.870 | -5.676 | -0.076 | 3.930 | 4.006 |
| 0.045 | 0.201 | -3.824 | -0.541 | 4.044 | 4.585 |
| 0.249 | 0.446 | -5.086 | 0.316  | 5.642 | 5.326 |
| 0.417 | 0.604 | -5.404 | 0.199  | 2.589 | 2.389 |
| 0.289 | 0.488 | -5.184 | 0.231  | 4.481 | 4.250 |
| 0.022 | 0.171 | -3.267 | 0.856  | 7.079 | 6.223 |
| 0.047 | 0.203 | -3.856 | 0.745  | 7.759 | 7.014 |
| 0.024 | 0.173 | -3.326 | 1.113  | 9.032 | 7.919 |
| 0.061 | 0.224 | -4.067 | 0.433  | 4.089 | 3.657 |
| 0.093 | 0.268 | -4.385 | -0.856 | 3.556 | 4.412 |
| 0.006 | 0.157 | -2.242 | -0.993 | 5.427 | 6.419 |
| 0.431 | 0.616 | -5.421 | 0.312  | 3.700 | 3.389 |
| 0.690 | 0.815 | -5.640 | 0.145  | 5.146 | 5.001 |
| 0.520 | 0.686 | -5.519 | -0.192 | 4.497 | 4.688 |
| 0.006 | 0.157 | -2.179 | 1.584  | 4.646 | 3.062 |
| 0.463 | 0.643 | -5.460 | -0.198 | 5.226 | 5.424 |
| 0.865 | 0.928 | -5.701 | 0.044  | 5.511 | 5.467 |
| 0.276 | 0.474 | -5.153 | 0.441  | 6.753 | 6.312 |
| 0.359 | 0.552 | -5.317 | 0.235  | 5.506 | 5.271 |
| 0.002 | 0.157 | -1.231 | 1.726  | 5.974 | 4.247 |
| 0.342 | 0.537 | -5.288 | -0.453 | 3.423 | 3.875 |
| 0.871 | 0.930 | -5.702 | -0.038 | 5.605 | 5.643 |
| 0.031 | 0.182 | -3.544 | 0.876  | 7.356 | 6.480 |
| 0.035 | 0.188 | -3.641 | 1.008  | 6.374 | 5.366 |
| 0.025 | 0.175 | -3.354 | 0.831  | 5.834 | 5.002 |
| 0.170 | 0.360 | -4.826 | 0.381  | 2.620 | 2.239 |
| 0.296 | 0.493 | -5.198 | 0.295  | 5.859 | 5.565 |
| 0.094 | 0.270 | -4.395 | 1.009  | 6.882 | 5.872 |
| 0.117 | 0.297 | -4.556 | 0.508  | 3.731 | 3.222 |
| 0.390 | 0.577 | -5.365 | 0.263  | 4.001 | 3.739 |
| 0.006 | 0.157 | -2.182 | 1.308  | 5.630 | 4.322 |
| 0.121 | 0.301 | -4.580 | 0.408  | 8.008 | 7.600 |
| 0.546 | 0.707 | -5.542 | 0.269  | 5.533 | 5.264 |
| 0.018 | 0.162 | -3.081 | 0.958  | 7.242 | 6.284 |
| 0.046 | 0.203 | -3.838 | 0.857  | 7.438 | 6.582 |
| 0.015 | 0.161 | -2.964 | 1.295  | 7.151 | 5.856 |
| 0.101 | 0.278 | -4.445 | 0.570  | 4.692 | 4.122 |
| 0.009 | 0.157 | -2.524 | 1.092  | 8.187 | 7.095 |
| 0.067 | 0.232 | -4.136 | 1.135  | 7.576 | 6.441 |
| 0.018 | 0.163 | -3.094 | 1.808  | 9.815 | 8.007 |
| 0.330 | 0.525 | -5.265 | -0.274 | 5.599 | 5.874 |
| 0.628 | 0.769 | -5.603 | 0.156  | 2.490 | 2.335 |
| 0.009 | 0.157 | -2.499 | 1.549  | 5.604 | 4.055 |

|       |       |        |        |        |       |
|-------|-------|--------|--------|--------|-------|
| 0.054 | 0.215 | -3.977 | 0.533  | 8.211  | 7.679 |
| 0.091 | 0.266 | -4.368 | 0.932  | 8.837  | 7.905 |
| 0.241 | 0.439 | -5.066 | 0.362  | 5.826  | 5.464 |
| 0.044 | 0.200 | -3.804 | 0.942  | 8.591  | 7.649 |
| 0.004 | 0.157 | -1.918 | 1.465  | 7.952  | 6.487 |
| 0.029 | 0.178 | -3.494 | -0.662 | 4.640  | 5.302 |
| 0.556 | 0.716 | -5.551 | 0.349  | 6.965  | 6.615 |
| 0.456 | 0.637 | -5.452 | -0.647 | 6.383  | 7.030 |
| 0.156 | 0.344 | -4.766 | -0.447 | 5.045  | 5.492 |
| 0.033 | 0.184 | -3.577 | 0.670  | 3.807  | 3.137 |
| 0.701 | 0.822 | -5.645 | -0.092 | 3.647  | 3.739 |
| 0.060 | 0.222 | -4.053 | 0.474  | 5.102  | 4.627 |
| 0.156 | 0.343 | -4.764 | 0.662  | 5.972  | 5.310 |
| 0.124 | 0.305 | -4.598 | 0.432  | 4.891  | 4.459 |
| 0.011 | 0.157 | -2.678 | 1.024  | 8.226  | 7.202 |
| 0.032 | 0.183 | -3.568 | 1.777  | 7.389  | 5.612 |
| 0.012 | 0.160 | -2.764 | 1.859  | 10.499 | 8.640 |
| 0.015 | 0.160 | -2.927 | 1.077  | 8.569  | 7.492 |
| 0.002 | 0.157 | -1.325 | 0.698  | 7.377  | 6.679 |
| 0.235 | 0.432 | -5.049 | 0.390  | 7.848  | 7.458 |
| 0.302 | 0.500 | -5.212 | 0.294  | 8.344  | 8.049 |
| 0.764 | 0.864 | -5.672 | 0.140  | 5.737  | 5.597 |
| 0.023 | 0.173 | -3.299 | 1.202  | 6.982  | 5.781 |
| 0.010 | 0.157 | -2.654 | 1.151  | 6.582  | 5.431 |
| 0.010 | 0.157 | -2.645 | 1.208  | 7.687  | 6.479 |
| 0.009 | 0.157 | -2.493 | 1.958  | 7.967  | 6.010 |
| 0.023 | 0.173 | -3.297 | 0.500  | 9.361  | 8.861 |
| 0.027 | 0.176 | -3.423 | 0.772  | 4.356  | 3.584 |
| 0.309 | 0.507 | -5.226 | 0.243  | 7.873  | 7.629 |
| 0.050 | 0.208 | -3.912 | 0.574  | 7.763  | 7.189 |
| 0.197 | 0.392 | -4.931 | 0.278  | 7.100  | 6.822 |
| 0.012 | 0.160 | -2.778 | 1.310  | 9.692  | 8.382 |
| 0.806 | 0.891 | -5.686 | -0.063 | 2.635  | 2.698 |
| 0.147 | 0.331 | -4.722 | -0.468 | 2.126  | 2.595 |
| 0.026 | 0.176 | -3.395 | -1.057 | 5.867  | 6.924 |
| 0.276 | 0.474 | -5.154 | 0.250  | 6.785  | 6.535 |
| 0.025 | 0.175 | -3.370 | -0.866 | 3.926  | 4.792 |
| 0.001 | 0.157 | -0.545 | 0.950  | 5.006  | 4.056 |
| 0.526 | 0.691 | -5.524 | -0.190 | 2.422  | 2.612 |
| 0.007 | 0.157 | -2.311 | -0.627 | 3.995  | 4.621 |
| 0.024 | 0.173 | -3.337 | -1.176 | 5.835  | 7.012 |
| 0.680 | 0.808 | -5.634 | 0.267  | 5.214  | 4.947 |
| 0.181 | 0.373 | -4.872 | 0.457  | 2.883  | 2.427 |
| 0.256 | 0.454 | -5.106 | -0.334 | 3.970  | 4.305 |
| 0.399 | 0.586 | -5.378 | -0.282 | 3.304  | 3.586 |
| 0.126 | 0.307 | -4.612 | 0.338  | 8.027  | 7.689 |
| 0.047 | 0.203 | -3.855 | 0.787  | 6.789  | 6.001 |
| 0.955 | 0.977 | -5.713 | 0.015  | 1.877  | 1.861 |
| 0.120 | 0.300 | -4.574 | -0.401 | 2.628  | 3.029 |
| 0.225 | 0.422 | -5.020 | 0.357  | 2.599  | 2.243 |

|       |       |        |        |       |       |
|-------|-------|--------|--------|-------|-------|
| 0.638 | 0.777 | -5.610 | 0.122  | 1.968 | 1.847 |
| 0.008 | 0.157 | -2.430 | 1.188  | 5.807 | 4.620 |
| 0.031 | 0.181 | -3.530 | -0.616 | 6.292 | 6.907 |
| 0.652 | 0.788 | -5.618 | -0.110 | 2.603 | 2.713 |
| 0.713 | 0.829 | -5.651 | -0.100 | 3.918 | 4.019 |
| 0.077 | 0.246 | -4.241 | -0.468 | 4.087 | 4.555 |
| 0.035 | 0.186 | -3.619 | -0.535 | 7.004 | 7.539 |
| 0.855 | 0.922 | -5.699 | -0.062 | 3.010 | 3.072 |
| 0.007 | 0.157 | -2.365 | 2.023  | 7.344 | 5.321 |
| 0.741 | 0.850 | -5.663 | -0.089 | 3.299 | 3.388 |
| 0.016 | 0.162 | -3.018 | 1.392  | 5.728 | 4.336 |
| 0.044 | 0.200 | -3.804 | -0.551 | 5.347 | 5.899 |
| 0.694 | 0.817 | -5.642 | 0.111  | 3.205 | 3.095 |
| 0.143 | 0.327 | -4.705 | 0.410  | 2.566 | 2.156 |
| 0.104 | 0.281 | -4.467 | 0.391  | 6.909 | 6.519 |
| 0.023 | 0.173 | -3.312 | -0.546 | 3.327 | 3.873 |
| 0.012 | 0.160 | -2.753 | 1.203  | 4.165 | 2.962 |
| 0.858 | 0.924 | -5.700 | 0.049  | 4.974 | 4.926 |
| 0.020 | 0.167 | -3.199 | 0.682  | 3.249 | 2.567 |
| 0.029 | 0.178 | -3.494 | 0.520  | 6.281 | 5.762 |
| 0.634 | 0.774 | -5.608 | 0.141  | 4.239 | 4.098 |
| 0.079 | 0.249 | -4.260 | -0.680 | 4.235 | 4.916 |
| 0.206 | 0.401 | -4.959 | 0.455  | 3.206 | 2.751 |
| 0.006 | 0.157 | -2.232 | 0.825  | 6.469 | 5.644 |
| 0.876 | 0.933 | -5.703 | 0.051  | 2.221 | 2.170 |
| 0.773 | 0.869 | -5.675 | -0.096 | 3.491 | 3.587 |
| 0.143 | 0.327 | -4.702 | 0.306  | 6.038 | 5.733 |
| 0.790 | 0.881 | -5.681 | 0.073  | 2.472 | 2.399 |
| 0.083 | 0.254 | -4.298 | -0.676 | 2.425 | 3.100 |
| 0.342 | 0.537 | -5.288 | -0.247 | 6.112 | 6.359 |
| 0.754 | 0.858 | -5.668 | 0.094  | 5.784 | 5.691 |
| 0.302 | 0.500 | -5.211 | -0.454 | 3.871 | 4.325 |
| 0.303 | 0.500 | -5.212 | -0.509 | 4.226 | 4.735 |
| 0.095 | 0.271 | -4.400 | -0.501 | 5.854 | 6.354 |
| 0.660 | 0.793 | -5.623 | -0.110 | 4.330 | 4.440 |
| 0.009 | 0.157 | -2.565 | 0.917  | 3.573 | 2.657 |
| 0.050 | 0.208 | -3.913 | 0.391  | 5.604 | 5.213 |
| 0.273 | 0.471 | -5.148 | -0.348 | 3.367 | 3.715 |
| 0.223 | 0.419 | -5.013 | -0.351 | 3.737 | 4.088 |
| 0.069 | 0.236 | -4.165 | -0.483 | 3.090 | 3.573 |
| 0.007 | 0.157 | -2.379 | -0.861 | 2.071 | 2.932 |
| 0.481 | 0.658 | -5.480 | -0.230 | 3.103 | 3.333 |
| 0.260 | 0.457 | -5.115 | 0.324  | 3.495 | 3.171 |
| 0.462 | 0.643 | -5.459 | 0.257  | 2.788 | 2.530 |
| 0.014 | 0.160 | -2.889 | 1.229  | 5.485 | 4.256 |
| 0.955 | 0.977 | -5.713 | 0.017  | 2.689 | 2.672 |
| 0.402 | 0.589 | -5.382 | 0.286  | 4.640 | 4.354 |
| 0.854 | 0.921 | -5.699 | -0.062 | 2.141 | 2.203 |
| 0.012 | 0.160 | -2.751 | 1.010  | 5.486 | 4.477 |
| 0.660 | 0.793 | -5.623 | 0.112  | 4.552 | 4.440 |

|       |       |        |        |       |       |
|-------|-------|--------|--------|-------|-------|
| 0.756 | 0.859 | -5.669 | -0.093 | 3.110 | 3.203 |
| 0.866 | 0.928 | -5.701 | -0.056 | 3.610 | 3.666 |
| 0.399 | 0.587 | -5.379 | 0.248  | 3.301 | 3.052 |
| 0.361 | 0.553 | -5.321 | -0.358 | 1.260 | 1.619 |
| 0.231 | 0.428 | -5.037 | 0.316  | 3.214 | 2.898 |
| 0.210 | 0.404 | -4.971 | -0.354 | 2.792 | 3.147 |
| 0.159 | 0.348 | -4.781 | 0.324  | 8.462 | 8.138 |
| 0.623 | 0.766 | -5.600 | 0.157  | 1.664 | 1.507 |
| 0.112 | 0.290 | -4.523 | 0.528  | 4.014 | 3.486 |
| 0.007 | 0.157 | -2.335 | 0.675  | 2.736 | 2.061 |
| 0.002 | 0.157 | -1.212 | 0.938  | 3.580 | 2.642 |
| 0.227 | 0.424 | -5.027 | 0.371  | 3.809 | 3.438 |
| 0.992 | 0.996 | -5.715 | -0.003 | 4.504 | 4.506 |
| 0.129 | 0.310 | -4.629 | 0.468  | 4.490 | 4.022 |
| 0.304 | 0.501 | -5.215 | -0.250 | 3.189 | 3.439 |
| 0.828 | 0.903 | -5.693 | 0.072  | 4.062 | 3.990 |
| 0.073 | 0.241 | -4.203 | -0.564 | 1.433 | 1.998 |
| 0.023 | 0.173 | -3.297 | 0.707  | 6.431 | 5.724 |
| 0.958 | 0.978 | -5.713 | 0.013  | 4.290 | 4.277 |
| 0.812 | 0.894 | -5.688 | -0.075 | 3.263 | 3.338 |
| 0.005 | 0.157 | -1.993 | 1.573  | 5.238 | 3.665 |
| 0.009 | 0.157 | -2.554 | 0.981  | 4.702 | 3.720 |
| 0.043 | 0.200 | -3.802 | 0.683  | 3.430 | 2.746 |
| 0.009 | 0.157 | -2.505 | 1.776  | 7.080 | 5.304 |
| 0.850 | 0.919 | -5.698 | 0.071  | 2.146 | 2.074 |
| 0.400 | 0.588 | -5.380 | -0.291 | 2.567 | 2.857 |
| 0.763 | 0.864 | -5.672 | 0.117  | 1.856 | 1.740 |
| 0.613 | 0.758 | -5.594 | -0.181 | 2.609 | 2.790 |
| 0.449 | 0.631 | -5.444 | 0.206  | 3.772 | 3.565 |
| 0.051 | 0.209 | -3.928 | 0.880  | 4.851 | 3.971 |
| 0.047 | 0.203 | -3.857 | -0.764 | 3.374 | 4.138 |
| 0.116 | 0.296 | -4.548 | 0.413  | 3.261 | 2.848 |
| 0.068 | 0.234 | -4.149 | -0.545 | 1.794 | 2.339 |
| 0.203 | 0.398 | -4.951 | -0.376 | 4.323 | 4.699 |
| 0.011 | 0.157 | -2.688 | 0.794  | 4.420 | 3.627 |
| 0.712 | 0.828 | -5.650 | 0.069  | 6.270 | 6.201 |
| 0.421 | 0.607 | -5.409 | 0.208  | 4.418 | 4.210 |
| 0.010 | 0.157 | -2.613 | -1.173 | 3.528 | 4.701 |
| 0.091 | 0.267 | -4.372 | 0.468  | 3.637 | 3.169 |
| 0.229 | 0.427 | -5.032 | 0.299  | 4.070 | 3.771 |
| 0.695 | 0.818 | -5.642 | -0.098 | 6.313 | 6.411 |
| 0.338 | 0.533 | -5.280 | 0.286  | 2.624 | 2.338 |
| 0.524 | 0.689 | -5.523 | 0.166  | 4.747 | 4.582 |
| 0.145 | 0.329 | -4.711 | -0.400 | 7.480 | 7.880 |
| 0.826 | 0.901 | -5.692 | -0.095 | 3.263 | 3.358 |
| 0.821 | 0.899 | -5.690 | -0.058 | 2.585 | 2.643 |
| 0.137 | 0.320 | -4.671 | 0.403  | 4.765 | 4.362 |
| 0.483 | 0.659 | -5.482 | 0.145  | 6.238 | 6.093 |
| 0.009 | 0.157 | -2.555 | 1.033  | 4.322 | 3.288 |
| 0.514 | 0.681 | -5.513 | 0.182  | 3.640 | 3.458 |

|       |       |        |        |       |       |
|-------|-------|--------|--------|-------|-------|
| 0.901 | 0.946 | -5.707 | 0.037  | 4.068 | 4.031 |
| 0.564 | 0.721 | -5.557 | -0.290 | 5.342 | 5.632 |
| 0.996 | 0.998 | -5.715 | -0.001 | 4.662 | 4.664 |
| 0.517 | 0.684 | -5.516 | 0.461  | 5.548 | 5.086 |
| 0.068 | 0.233 | -4.145 | -0.480 | 6.776 | 7.256 |
| 0.816 | 0.896 | -5.689 | 0.123  | 3.486 | 3.363 |
| 0.834 | 0.907 | -5.694 | -0.142 | 3.179 | 3.321 |
| 0.723 | 0.837 | -5.655 | -0.168 | 4.129 | 4.298 |
| 0.121 | 0.302 | -4.583 | 0.472  | 8.510 | 8.038 |
| 0.416 | 0.603 | -5.402 | 0.277  | 2.098 | 1.821 |
| 0.007 | 0.157 | -2.368 | -1.384 | 5.509 | 6.893 |
| 0.357 | 0.551 | -5.314 | -0.355 | 2.860 | 3.216 |
| 0.209 | 0.404 | -4.971 | 0.551  | 4.262 | 3.711 |
| 0.437 | 0.621 | -5.429 | 0.215  | 3.543 | 3.328 |
| 0.523 | 0.689 | -5.522 | -0.277 | 3.544 | 3.821 |
| 0.974 | 0.987 | -5.714 | -0.010 | 3.040 | 3.050 |
| 0.357 | 0.551 | -5.313 | -0.292 | 2.029 | 2.321 |
| 0.304 | 0.502 | -5.216 | -0.340 | 2.575 | 2.915 |
| 0.289 | 0.488 | -5.184 | 0.369  | 5.957 | 5.588 |
| 0.073 | 0.241 | -4.202 | -0.766 | 4.192 | 4.957 |
| 0.786 | 0.878 | -5.680 | -0.109 | 4.081 | 4.190 |
| 0.494 | 0.667 | -5.493 | -0.195 | 3.118 | 3.312 |
| 0.213 | 0.408 | -4.982 | -0.324 | 3.350 | 3.674 |
| 0.097 | 0.274 | -4.420 | -1.008 | 4.051 | 5.059 |
| 0.279 | 0.477 | -5.161 | -0.550 | 2.348 | 2.898 |
| 0.904 | 0.948 | -5.708 | -0.034 | 1.202 | 1.236 |
| 0.802 | 0.889 | -5.685 | 0.068  | 2.576 | 2.508 |
| 0.071 | 0.238 | -4.177 | -0.577 | 5.440 | 6.017 |
| 0.120 | 0.299 | -4.573 | -0.342 | 3.530 | 3.872 |
| 0.387 | 0.575 | -5.361 | -0.165 | 5.387 | 5.552 |
| 0.278 | 0.477 | -5.159 | -0.443 | 7.551 | 7.994 |
| 0.601 | 0.751 | -5.586 | 0.241  | 1.613 | 1.372 |
| 0.206 | 0.401 | -4.961 | -0.511 | 4.783 | 5.294 |
| 0.116 | 0.295 | -4.548 | -0.293 | 2.911 | 3.204 |
| 0.272 | 0.470 | -5.144 | -0.311 | 3.657 | 3.969 |
| 0.092 | 0.267 | -4.376 | 0.497  | 6.186 | 5.689 |
| 0.290 | 0.488 | -5.185 | -0.476 | 2.568 | 3.044 |
| 0.108 | 0.287 | -4.497 | -0.744 | 3.740 | 4.484 |
| 0.142 | 0.326 | -4.697 | -0.427 | 3.464 | 3.892 |
| 0.276 | 0.475 | -5.154 | 0.361  | 5.152 | 4.791 |
| 0.227 | 0.424 | -5.025 | -0.424 | 4.339 | 4.763 |
| 0.018 | 0.163 | -3.116 | -0.857 | 7.633 | 8.491 |
| 0.432 | 0.616 | -5.422 | -0.197 | 3.353 | 3.550 |
| 0.212 | 0.407 | -4.978 | 0.258  | 5.177 | 4.920 |
| 0.086 | 0.258 | -4.329 | -0.848 | 3.667 | 4.514 |
| 0.052 | 0.211 | -3.939 | 0.558  | 6.483 | 5.925 |
| 0.030 | 0.179 | -3.505 | -0.738 | 3.984 | 4.722 |
| 0.117 | 0.296 | -4.554 | -0.523 | 3.505 | 4.028 |
| 0.535 | 0.698 | -5.533 | -0.144 | 5.557 | 5.701 |
| 0.236 | 0.433 | -5.051 | 0.237  | 3.794 | 3.557 |



|       |       |        |        |       |       |
|-------|-------|--------|--------|-------|-------|
| 0.017 | 0.162 | -3.071 | 0.915  | 6.220 | 5.305 |
| 0.300 | 0.497 | -5.206 | -0.347 | 3.206 | 3.553 |
| 0.647 | 0.784 | -5.616 | 0.135  | 3.069 | 2.934 |
| 0.351 | 0.545 | -5.303 | -0.353 | 3.280 | 3.634 |
| 0.018 | 0.162 | -3.082 | 1.059  | 7.910 | 6.851 |
| 0.053 | 0.212 | -3.950 | 0.881  | 4.413 | 3.532 |
| 0.014 | 0.160 | -2.909 | 1.261  | 8.123 | 6.862 |
| 0.033 | 0.184 | -3.586 | 1.098  | 6.358 | 5.260 |
| 0.107 | 0.286 | -4.494 | -0.893 | 4.102 | 4.996 |
| 0.012 | 0.159 | -2.742 | -0.712 | 6.226 | 6.938 |
| 0.018 | 0.163 | -3.108 | 1.146  | 5.987 | 4.841 |
| 0.723 | 0.837 | -5.655 | -0.093 | 2.908 | 3.001 |
| 0.045 | 0.201 | -3.823 | 0.751  | 3.877 | 3.126 |
| 0.088 | 0.261 | -4.343 | 0.451  | 4.787 | 4.336 |
| 0.042 | 0.197 | -3.773 | 0.559  | 6.713 | 6.154 |
| 0.108 | 0.286 | -4.495 | 0.687  | 5.232 | 4.545 |
| 0.103 | 0.280 | -4.461 | 0.596  | 7.824 | 7.227 |
| 0.007 | 0.157 | -2.292 | 1.986  | 6.420 | 4.434 |
| 0.145 | 0.329 | -4.713 | 0.451  | 5.101 | 4.650 |
| 0.012 | 0.160 | -2.785 | 1.140  | 9.306 | 8.166 |
| 0.024 | 0.173 | -3.317 | -1.031 | 4.614 | 5.645 |
| 0.076 | 0.245 | -4.229 | 0.479  | 4.628 | 4.149 |
| 0.033 | 0.184 | -3.587 | 0.642  | 5.553 | 4.911 |
| 0.055 | 0.216 | -3.990 | -0.622 | 3.478 | 4.100 |
| 0.091 | 0.266 | -4.367 | 0.454  | 7.064 | 6.610 |
| 0.024 | 0.174 | -3.343 | 1.101  | 7.059 | 5.958 |
| 0.070 | 0.237 | -4.172 | 0.655  | 5.748 | 5.094 |
| 0.085 | 0.257 | -4.318 | -0.481 | 4.765 | 5.247 |
| 0.169 | 0.359 | -4.822 | 0.298  | 5.214 | 4.916 |
| 0.016 | 0.162 | -3.026 | 0.705  | 4.601 | 3.896 |
| 0.041 | 0.195 | -3.750 | 0.518  | 6.226 | 5.707 |
| 0.013 | 0.160 | -2.855 | 0.763  | 8.283 | 7.520 |
| 0.789 | 0.880 | -5.681 | 0.097  | 3.870 | 3.772 |
| 0.018 | 0.163 | -3.102 | -0.962 | 4.004 | 4.966 |
| 0.105 | 0.283 | -4.478 | 0.332  | 5.728 | 5.395 |
| 0.187 | 0.379 | -4.893 | -0.345 | 2.227 | 2.573 |
| 0.911 | 0.952 | -5.709 | -0.032 | 2.681 | 2.713 |
| 0.011 | 0.157 | -2.693 | 0.751  | 6.036 | 5.284 |
| 0.007 | 0.157 | -2.340 | 0.700  | 3.012 | 2.312 |
| 0.680 | 0.808 | -5.634 | -0.119 | 3.069 | 3.189 |
| 0.083 | 0.255 | -4.301 | 0.545  | 7.463 | 6.918 |
| 0.173 | 0.362 | -4.838 | 0.333  | 4.380 | 4.047 |
| 0.080 | 0.252 | -4.277 | 0.559  | 5.583 | 5.024 |
| 0.014 | 0.160 | -2.868 | -0.792 | 4.489 | 5.281 |
| 0.485 | 0.661 | -5.484 | -0.187 | 3.468 | 3.655 |
| 0.039 | 0.192 | -3.709 | 1.139  | 6.928 | 5.789 |
| 0.021 | 0.168 | -3.223 | 0.870  | 6.748 | 5.878 |
| 0.051 | 0.210 | -3.931 | 0.889  | 5.635 | 4.745 |
| 0.082 | 0.253 | -4.287 | -0.523 | 3.727 | 4.250 |
| 0.336 | 0.532 | -5.278 | 0.252  | 4.449 | 4.198 |

|       |       |        |        |       |       |
|-------|-------|--------|--------|-------|-------|
| 0.614 | 0.758 | -5.594 | 0.185  | 6.072 | 5.887 |
| 0.238 | 0.435 | -5.056 | -0.369 | 3.518 | 3.887 |
| 0.018 | 0.162 | -3.088 | -0.887 | 3.546 | 4.434 |
| 0.200 | 0.396 | -4.941 | 0.386  | 4.313 | 3.926 |
| 0.484 | 0.660 | -5.483 | -0.203 | 3.496 | 3.699 |
| 0.019 | 0.164 | -3.126 | 0.715  | 8.466 | 7.751 |
| 0.038 | 0.191 | -3.686 | 0.962  | 5.653 | 4.691 |
| 0.029 | 0.178 | -3.493 | 1.261  | 8.171 | 6.910 |
| 0.041 | 0.195 | -3.751 | 1.040  | 6.696 | 5.656 |
| 0.102 | 0.279 | -4.453 | 0.518  | 4.383 | 3.865 |
| 0.028 | 0.178 | -3.458 | 1.361  | 5.795 | 4.434 |
| 0.044 | 0.200 | -3.805 | 0.725  | 6.967 | 6.242 |
| 0.034 | 0.185 | -3.616 | -0.524 | 4.700 | 5.224 |
| 0.893 | 0.941 | -5.706 | -0.032 | 5.094 | 5.127 |
| 0.112 | 0.290 | -4.523 | 0.386  | 4.772 | 4.385 |
| 0.804 | 0.890 | -5.686 | 0.055  | 4.160 | 4.105 |
| 0.258 | 0.455 | -5.109 | 0.320  | 4.141 | 3.821 |
| 0.641 | 0.779 | -5.612 | -0.109 | 5.733 | 5.842 |
| 0.052 | 0.211 | -3.940 | 0.643  | 6.163 | 5.520 |
| 0.129 | 0.310 | -4.628 | 0.555  | 5.769 | 5.214 |
| 0.119 | 0.299 | -4.572 | -0.445 | 6.121 | 6.567 |
| 0.533 | 0.696 | -5.531 | 0.158  | 3.541 | 3.384 |
| 0.753 | 0.857 | -5.668 | 0.069  | 4.249 | 4.179 |
| 0.077 | 0.246 | -4.239 | -0.484 | 5.219 | 5.703 |
| 0.291 | 0.489 | -5.187 | -0.240 | 6.925 | 7.165 |
| 0.143 | 0.327 | -4.704 | -0.654 | 5.885 | 6.539 |
| 0.080 | 0.251 | -4.276 | 0.561  | 2.949 | 2.388 |
| 0.003 | 0.157 | -1.702 | -1.024 | 3.477 | 4.502 |
| 0.090 | 0.264 | -4.360 | 0.502  | 8.098 | 7.596 |
| 0.387 | 0.575 | -5.361 | 0.280  | 2.924 | 2.643 |
| 0.203 | 0.398 | -4.950 | 0.365  | 3.392 | 3.026 |
| 0.488 | 0.664 | -5.487 | -0.215 | 5.559 | 5.774 |
| 0.720 | 0.834 | -5.654 | -0.113 | 3.154 | 3.268 |
| 0.765 | 0.865 | -5.672 | -0.111 | 3.662 | 3.773 |
| 0.196 | 0.390 | -4.924 | 0.626  | 4.847 | 4.220 |
| 0.495 | 0.667 | -5.494 | 0.255  | 3.054 | 2.799 |
| 0.325 | 0.521 | -5.256 | 0.217  | 3.357 | 3.139 |
| 0.024 | 0.173 | -3.318 | -0.597 | 5.486 | 6.084 |
| 0.123 | 0.304 | -4.594 | -0.383 | 4.228 | 4.612 |
| 0.756 | 0.859 | -5.669 | -0.082 | 2.097 | 2.179 |
| 0.735 | 0.846 | -5.661 | 0.110  | 3.191 | 3.081 |
| 0.028 | 0.178 | -3.459 | -0.603 | 1.898 | 2.501 |
| 0.103 | 0.280 | -4.463 | 0.491  | 5.105 | 4.613 |
| 0.112 | 0.290 | -4.524 | 0.743  | 4.795 | 4.052 |
| 0.497 | 0.669 | -5.497 | 0.261  | 4.707 | 4.447 |
| 0.821 | 0.899 | -5.691 | -0.086 | 3.845 | 3.932 |
| 0.284 | 0.482 | -5.172 | -0.510 | 3.848 | 4.359 |
| 0.125 | 0.306 | -4.604 | 0.420  | 4.376 | 3.956 |
| 0.023 | 0.173 | -3.296 | 0.717  | 4.605 | 3.888 |
| 0.323 | 0.520 | -5.253 | -0.328 | 1.528 | 1.856 |

|       |       |        |        |       |       |
|-------|-------|--------|--------|-------|-------|
| 0.991 | 0.995 | -5.715 | 0.003  | 4.552 | 4.549 |
| 0.322 | 0.519 | -5.251 | 0.248  | 3.062 | 2.814 |
| 0.190 | 0.382 | -4.903 | -0.340 | 5.684 | 6.024 |
| 0.016 | 0.162 | -3.018 | 0.921  | 7.686 | 6.765 |
| 0.026 | 0.176 | -3.401 | 1.545  | 7.509 | 5.964 |
| 0.021 | 0.168 | -3.219 | -0.792 | 4.930 | 5.722 |
| 0.061 | 0.224 | -4.067 | -0.618 | 2.032 | 2.650 |
| 0.930 | 0.962 | -5.711 | 0.028  | 2.147 | 2.119 |
| 0.932 | 0.963 | -5.711 | -0.027 | 2.168 | 2.195 |
| 0.039 | 0.193 | -3.716 | 1.287  | 6.938 | 5.651 |
| 0.068 | 0.234 | -4.149 | 0.964  | 5.682 | 4.718 |
| 0.131 | 0.314 | -4.642 | 1.194  | 7.927 | 6.732 |
| 0.258 | 0.455 | -5.109 | -0.813 | 2.689 | 3.501 |
| 0.454 | 0.634 | -5.449 | 0.161  | 6.423 | 6.262 |
| 0.310 | 0.508 | -5.228 | 0.340  | 2.470 | 2.129 |
| 0.069 | 0.235 | -4.155 | -0.512 | 5.937 | 6.449 |
| 0.011 | 0.157 | -2.695 | 0.719  | 7.825 | 7.106 |
| 0.831 | 0.905 | -5.693 | -0.052 | 4.514 | 4.567 |
| 0.085 | 0.257 | -4.317 | 0.406  | 6.939 | 6.533 |
| 0.019 | 0.164 | -3.147 | 0.753  | 6.102 | 5.349 |
| 0.002 | 0.157 | -1.110 | 1.435  | 6.973 | 5.539 |
| 0.089 | 0.263 | -4.350 | -0.598 | 1.658 | 2.255 |
| 0.023 | 0.173 | -3.288 | 0.573  | 3.955 | 3.382 |
| 0.328 | 0.523 | -5.262 | -0.274 | 4.297 | 4.571 |
| 0.040 | 0.194 | -3.745 | 0.690  | 4.068 | 3.378 |
| 0.017 | 0.162 | -3.059 | 1.284  | 6.770 | 5.487 |
| 0.017 | 0.162 | -3.050 | 1.173  | 4.370 | 3.197 |
| 0.729 | 0.841 | -5.658 | -0.139 | 4.046 | 4.185 |
| 0.006 | 0.157 | -2.212 | 1.349  | 5.144 | 3.795 |
| 0.114 | 0.293 | -4.541 | 0.573  | 4.266 | 3.693 |
| 0.842 | 0.912 | -5.696 | 0.167  | 2.116 | 1.949 |
| 0.319 | 0.517 | -5.246 | 0.330  | 2.697 | 2.367 |
| 0.112 | 0.290 | -4.522 | 0.452  | 3.582 | 3.129 |
| 0.801 | 0.888 | -5.685 | 0.063  | 3.129 | 3.067 |
| 0.855 | 0.922 | -5.699 | 0.071  | 3.161 | 3.090 |
| 0.092 | 0.267 | -4.379 | 0.650  | 5.353 | 4.702 |
| 0.049 | 0.206 | -3.887 | 0.756  | 5.913 | 5.156 |
| 0.532 | 0.696 | -5.530 | 0.142  | 3.901 | 3.759 |
| 0.104 | 0.281 | -4.468 | -0.409 | 2.898 | 3.307 |
| 0.023 | 0.172 | -3.280 | 0.614  | 7.203 | 6.590 |
| 0.084 | 0.256 | -4.311 | -0.681 | 5.357 | 6.038 |
| 0.634 | 0.774 | -5.608 | -0.188 | 5.216 | 5.404 |
| 0.175 | 0.365 | -4.847 | -0.496 | 2.957 | 3.453 |
| 0.018 | 0.163 | -3.093 | 0.996  | 4.555 | 3.559 |
| 0.050 | 0.208 | -3.910 | -0.681 | 5.454 | 6.135 |
| 0.296 | 0.493 | -5.199 | 0.299  | 4.834 | 4.535 |
| 0.585 | 0.739 | -5.574 | -0.129 | 4.334 | 4.463 |
| 0.034 | 0.184 | -3.600 | 0.540  | 3.385 | 2.845 |
| 0.223 | 0.420 | -5.015 | -0.329 | 3.427 | 3.755 |
| 0.195 | 0.389 | -4.922 | 0.370  | 4.689 | 4.319 |

|       |       |        |        |       |       |
|-------|-------|--------|--------|-------|-------|
| 0.032 | 0.183 | -3.569 | -0.814 | 3.670 | 4.484 |
| 0.061 | 0.223 | -4.061 | -0.625 | 3.591 | 4.215 |
| 0.040 | 0.194 | -3.739 | 0.605  | 4.102 | 3.497 |
| 0.702 | 0.822 | -5.645 | 0.111  | 8.273 | 8.162 |
| 0.257 | 0.455 | -5.108 | 0.241  | 7.108 | 6.867 |
| 0.047 | 0.204 | -3.864 | 0.529  | 4.765 | 4.237 |
| 0.647 | 0.784 | -5.615 | 0.149  | 2.500 | 2.351 |
| 0.034 | 0.185 | -3.614 | 0.833  | 6.491 | 5.659 |
| 0.321 | 0.518 | -5.249 | 0.276  | 3.565 | 3.290 |
| 0.058 | 0.219 | -4.021 | 0.809  | 6.138 | 5.329 |
| 0.069 | 0.236 | -4.165 | 0.521  | 5.375 | 4.854 |
| 0.092 | 0.268 | -4.381 | 0.534  | 2.753 | 2.219 |
| 0.096 | 0.273 | -4.413 | 1.132  | 7.264 | 6.133 |
| 0.048 | 0.205 | -3.878 | -0.588 | 4.478 | 5.065 |
| 0.052 | 0.212 | -3.948 | -1.076 | 3.240 | 4.316 |
| 0.322 | 0.519 | -5.252 | 0.245  | 3.268 | 3.023 |
| 0.033 | 0.184 | -3.574 | -0.744 | 4.531 | 5.275 |
| 0.944 | 0.970 | -5.712 | -0.013 | 7.895 | 7.908 |
| 0.029 | 0.178 | -3.469 | 0.683  | 7.229 | 6.546 |
| 0.024 | 0.173 | -3.328 | -1.063 | 4.111 | 5.174 |
| 0.044 | 0.201 | -3.816 | -0.523 | 2.631 | 3.154 |
| 0.001 | 0.157 | -0.243 | 0.910  | 3.348 | 2.438 |
| 0.582 | 0.736 | -5.571 | 0.160  | 2.590 | 2.430 |
| 0.867 | 0.928 | -5.702 | -0.041 | 3.013 | 3.054 |
| 0.037 | 0.190 | -3.672 | -0.573 | 2.689 | 3.262 |
| 0.008 | 0.157 | -2.387 | -0.983 | 7.418 | 8.401 |
| 0.529 | 0.694 | -5.527 | -0.231 | 2.977 | 3.208 |
| 0.389 | 0.577 | -5.364 | -0.291 | 2.741 | 3.033 |
| 0.861 | 0.926 | -5.700 | 0.065  | 3.813 | 3.748 |
| 0.709 | 0.827 | -5.649 | 0.094  | 2.974 | 2.880 |
| 0.030 | 0.180 | -3.517 | 0.990  | 7.424 | 6.433 |
| 0.706 | 0.826 | -5.648 | 0.097  | 2.387 | 2.290 |
| 0.163 | 0.352 | -4.798 | -0.760 | 1.895 | 2.655 |
| 0.460 | 0.641 | -5.457 | -0.338 | 3.946 | 4.284 |
| 0.005 | 0.157 | -2.048 | -1.022 | 1.667 | 2.688 |
| 0.102 | 0.280 | -4.457 | 0.588  | 4.082 | 3.493 |
| 0.914 | 0.954 | -5.709 | 0.027  | 5.800 | 5.773 |
| 0.958 | 0.978 | -5.713 | 0.014  | 5.829 | 5.815 |
| 0.984 | 0.991 | -5.715 | 0.005  | 5.789 | 5.785 |
| 0.483 | 0.659 | -5.482 | -0.147 | 4.825 | 4.972 |
| 0.489 | 0.664 | -5.489 | -0.148 | 4.804 | 4.952 |
| 0.031 | 0.182 | -3.544 | 0.928  | 5.052 | 4.124 |
| 0.368 | 0.559 | -5.332 | 0.205  | 1.920 | 1.715 |
| 0.496 | 0.668 | -5.496 | -0.223 | 8.122 | 8.345 |
| 0.109 | 0.288 | -4.507 | -0.581 | 2.262 | 2.843 |
| 0.104 | 0.282 | -4.472 | -0.633 | 5.088 | 5.721 |
| 0.924 | 0.959 | -5.710 | 0.034  | 4.568 | 4.534 |
| 0.020 | 0.167 | -3.179 | -0.588 | 4.936 | 5.524 |
| 0.392 | 0.580 | -5.368 | -0.236 | 3.680 | 3.916 |
| 0.405 | 0.593 | -5.387 | -0.209 | 4.131 | 4.341 |

|       |       |        |        |       |       |
|-------|-------|--------|--------|-------|-------|
| 0.140 | 0.324 | -4.686 | 0.337  | 7.501 | 7.164 |
| 0.015 | 0.161 | -2.972 | 0.610  | 9.706 | 9.097 |
| 0.021 | 0.168 | -3.206 | 1.404  | 7.908 | 6.504 |
| 0.059 | 0.220 | -4.034 | 0.959  | 6.812 | 5.852 |
| 0.085 | 0.257 | -4.320 | 0.427  | 6.892 | 6.465 |
| 0.184 | 0.375 | -4.882 | -0.369 | 3.344 | 3.713 |
| 0.161 | 0.350 | -4.789 | 0.527  | 3.376 | 2.848 |
| 0.074 | 0.241 | -4.211 | 0.764  | 5.214 | 4.450 |
| 0.019 | 0.164 | -3.146 | 1.315  | 7.877 | 6.562 |
| 0.022 | 0.170 | -3.254 | 1.355  | 7.448 | 6.092 |
| 0.101 | 0.278 | -4.448 | 0.455  | 2.993 | 2.538 |
| 0.099 | 0.276 | -4.433 | 0.394  | 6.848 | 6.454 |
| 0.142 | 0.326 | -4.696 | -0.470 | 3.965 | 4.435 |
| 0.335 | 0.531 | -5.276 | -0.268 | 4.203 | 4.471 |
| 0.012 | 0.160 | -2.776 | -1.408 | 4.775 | 6.183 |
| 0.504 | 0.674 | -5.504 | -0.245 | 3.154 | 3.399 |
| 0.253 | 0.451 | -5.097 | -0.262 | 4.213 | 4.475 |
| 0.102 | 0.279 | -4.452 | -0.814 | 8.746 | 9.559 |
| 0.324 | 0.520 | -5.255 | 0.233  | 6.622 | 6.389 |
| 0.150 | 0.335 | -4.735 | -0.632 | 2.550 | 3.181 |
| 0.129 | 0.310 | -4.626 | 0.562  | 3.277 | 2.715 |
| 0.016 | 0.162 | -3.023 | 0.886  | 5.496 | 4.610 |
| 0.114 | 0.292 | -4.535 | 0.381  | 3.868 | 3.487 |
| 0.009 | 0.157 | -2.565 | 1.267  | 8.990 | 7.723 |
| 0.184 | 0.375 | -4.880 | -0.455 | 4.110 | 4.564 |
| 0.099 | 0.275 | -4.431 | 0.670  | 5.002 | 4.331 |
| 0.103 | 0.281 | -4.466 | -0.597 | 4.563 | 5.160 |
| 0.358 | 0.551 | -5.315 | 0.265  | 7.652 | 7.388 |
| 0.035 | 0.186 | -3.633 | 0.985  | 5.907 | 4.921 |
| 0.033 | 0.184 | -3.575 | -0.946 | 3.760 | 4.707 |
| 0.057 | 0.218 | -4.006 | -0.738 | 8.782 | 9.520 |
| 0.231 | 0.428 | -5.038 | 0.688  | 7.701 | 7.013 |
| 0.236 | 0.433 | -5.053 | 0.714  | 7.583 | 6.869 |
| 0.028 | 0.177 | -3.443 | 0.536  | 6.065 | 5.529 |
| 0.025 | 0.175 | -3.370 | 0.697  | 6.789 | 6.092 |
| 0.540 | 0.702 | -5.537 | -0.175 | 7.013 | 7.187 |
| 0.012 | 0.160 | -2.779 | -1.047 | 6.657 | 7.704 |
| 0.086 | 0.259 | -4.332 | 0.640  | 6.860 | 6.221 |
| 0.013 | 0.160 | -2.850 | 1.237  | 6.129 | 4.892 |
| 0.020 | 0.167 | -3.190 | 1.029  | 4.975 | 3.945 |
| 0.008 | 0.157 | -2.451 | 0.955  | 3.466 | 2.511 |
| 0.029 | 0.178 | -3.481 | 0.778  | 7.996 | 7.218 |
| 0.058 | 0.219 | -4.023 | 0.822  | 8.610 | 7.788 |
| 0.032 | 0.183 | -3.566 | 0.505  | 4.969 | 4.464 |
| 0.014 | 0.160 | -2.877 | -0.950 | 6.579 | 7.530 |
| 0.032 | 0.182 | -3.558 | 0.973  | 7.880 | 6.907 |
| 0.057 | 0.218 | -4.010 | 0.590  | 4.773 | 4.182 |
| 0.162 | 0.351 | -4.792 | 0.327  | 4.872 | 4.545 |
| 0.172 | 0.362 | -4.834 | 0.468  | 3.708 | 3.240 |
| 0.073 | 0.241 | -4.206 | 0.466  | 7.558 | 7.092 |

|       |       |        |        |       |       |
|-------|-------|--------|--------|-------|-------|
| 0.343 | 0.539 | -5.290 | 0.205  | 6.600 | 6.396 |
| 0.203 | 0.398 | -4.950 | 0.327  | 2.571 | 2.244 |
| 0.015 | 0.160 | -2.942 | 0.871  | 4.831 | 3.960 |
| 0.602 | 0.751 | -5.586 | -0.225 | 2.572 | 2.797 |
| 0.821 | 0.899 | -5.690 | 0.056  | 1.843 | 1.788 |
| 0.032 | 0.182 | -3.549 | -0.666 | 3.850 | 4.516 |
| 0.307 | 0.505 | -5.222 | -0.321 | 3.940 | 4.261 |
| 0.000 | 0.157 | 0.043  | 0.999  | 3.529 | 2.530 |
| 0.643 | 0.780 | -5.613 | -0.114 | 3.027 | 3.142 |
| 0.095 | 0.271 | -4.404 | 0.562  | 3.958 | 3.396 |
| 0.016 | 0.162 | -2.987 | 0.739  | 3.667 | 2.928 |
| 0.679 | 0.808 | -5.634 | -0.140 | 3.233 | 3.373 |
| 0.049 | 0.207 | -3.898 | 0.625  | 5.338 | 4.712 |
| 0.891 | 0.941 | -5.706 | 0.030  | 2.471 | 2.442 |
| 0.709 | 0.827 | -5.649 | 0.125  | 2.870 | 2.745 |
| 0.103 | 0.281 | -4.465 | 0.526  | 2.540 | 2.014 |
| 0.230 | 0.428 | -5.035 | 0.457  | 4.197 | 3.741 |
| 0.108 | 0.287 | -4.500 | 0.513  | 4.138 | 3.626 |
| 0.713 | 0.829 | -5.651 | 0.101  | 2.044 | 1.943 |
| 0.349 | 0.544 | -5.300 | 0.185  | 7.948 | 7.763 |
| 0.083 | 0.254 | -4.298 | -0.841 | 4.247 | 5.088 |
| 0.001 | 0.157 | -0.836 | 1.531  | 6.107 | 4.576 |
| 0.206 | 0.401 | -4.960 | 0.356  | 3.907 | 3.550 |
| 0.501 | 0.671 | -5.500 | 0.176  | 2.770 | 2.594 |
| 0.438 | 0.622 | -5.431 | -0.219 | 1.460 | 1.680 |
| 0.148 | 0.333 | -4.728 | -0.429 | 2.270 | 2.699 |
| 0.446 | 0.629 | -5.440 | -0.215 | 2.660 | 2.875 |
| 0.296 | 0.493 | -5.198 | -0.289 | 3.638 | 3.927 |
| 0.269 | 0.467 | -5.137 | -0.297 | 3.668 | 3.965 |
| 0.086 | 0.258 | -4.327 | 0.608  | 5.729 | 5.121 |
| 0.845 | 0.914 | -5.697 | -0.048 | 5.892 | 5.940 |
| 0.321 | 0.518 | -5.249 | 0.305  | 3.923 | 3.618 |
| 0.264 | 0.462 | -5.126 | 0.229  | 4.819 | 4.590 |
| 0.017 | 0.162 | -3.051 | -0.542 | 3.104 | 3.646 |
| 0.328 | 0.524 | -5.263 | 0.256  | 5.529 | 5.272 |
| 0.065 | 0.229 | -4.114 | 0.386  | 6.633 | 6.246 |
| 0.477 | 0.655 | -5.476 | -0.201 | 3.763 | 3.963 |
| 0.169 | 0.359 | -4.823 | 0.344  | 5.935 | 5.591 |
| 0.068 | 0.234 | -4.152 | 0.464  | 4.256 | 3.792 |
| 0.860 | 0.925 | -5.700 | -0.072 | 5.746 | 5.818 |
| 0.388 | 0.575 | -5.362 | 0.400  | 3.743 | 3.344 |
| 0.031 | 0.181 | -3.533 | 0.744  | 5.581 | 4.837 |
| 0.083 | 0.255 | -4.299 | -0.453 | 6.340 | 6.793 |
| 0.274 | 0.472 | -5.150 | 0.207  | 5.833 | 5.626 |
| 0.100 | 0.277 | -4.437 | 0.381  | 6.223 | 5.842 |
| 0.130 | 0.312 | -4.636 | 0.382  | 5.423 | 5.042 |
| 0.871 | 0.930 | -5.702 | -0.043 | 2.101 | 2.145 |
| 0.105 | 0.283 | -4.476 | 0.595  | 6.904 | 6.309 |
| 0.587 | 0.740 | -5.575 | -0.285 | 5.601 | 5.886 |
| 0.064 | 0.228 | -4.102 | -0.774 | 1.300 | 2.074 |

|       |       |        |        |       |       |
|-------|-------|--------|--------|-------|-------|
| 0.043 | 0.199 | -3.794 | -1.315 | 3.445 | 4.760 |
| 0.240 | 0.437 | -5.061 | -0.534 | 4.504 | 5.037 |
| 0.029 | 0.178 | -3.472 | -0.576 | 6.670 | 7.246 |
| 0.036 | 0.189 | -3.661 | 0.803  | 7.077 | 6.274 |
| 0.914 | 0.954 | -5.709 | -0.029 | 4.101 | 4.130 |
| 0.049 | 0.207 | -3.899 | 0.792  | 6.178 | 5.386 |
| 0.173 | 0.362 | -4.838 | 0.612  | 4.573 | 3.962 |
| 0.297 | 0.494 | -5.201 | 0.336  | 4.448 | 4.112 |
| 0.687 | 0.812 | -5.638 | 0.125  | 2.415 | 2.290 |
| 0.085 | 0.257 | -4.320 | -0.712 | 4.550 | 5.262 |
| 0.001 | 0.157 | -0.471 | -1.044 | 6.511 | 7.555 |
| 0.010 | 0.157 | -2.592 | 1.769  | 6.814 | 5.046 |
| 0.025 | 0.175 | -3.355 | 1.076  | 6.170 | 5.094 |
| 0.019 | 0.164 | -3.122 | 0.732  | 4.339 | 3.606 |
| 0.003 | 0.157 | -1.721 | 0.892  | 5.708 | 4.816 |
| 0.191 | 0.383 | -4.907 | 0.543  | 4.938 | 4.395 |
| 0.210 | 0.405 | -4.973 | 0.336  | 2.512 | 2.176 |
| 0.008 | 0.157 | -2.461 | -0.948 | 5.285 | 6.233 |
| 0.542 | 0.703 | -5.538 | 0.218  | 2.611 | 2.393 |
| 0.064 | 0.229 | -4.107 | -0.658 | 6.122 | 6.780 |
| 0.010 | 0.157 | -2.614 | -0.692 | 3.167 | 3.859 |
| 0.100 | 0.277 | -4.442 | -0.782 | 4.080 | 4.862 |
| 0.389 | 0.576 | -5.364 | 0.214  | 6.720 | 6.506 |
| 0.122 | 0.304 | -4.590 | -0.483 | 4.451 | 4.935 |
| 0.626 | 0.768 | -5.602 | -0.179 | 2.237 | 2.417 |
| 0.807 | 0.892 | -5.687 | 0.082  | 2.343 | 2.261 |
| 0.003 | 0.157 | -1.706 | -1.237 | 2.518 | 3.755 |
| 0.865 | 0.928 | -5.701 | -0.066 | 2.483 | 2.549 |
| 0.744 | 0.851 | -5.664 | -0.144 | 4.520 | 4.664 |
| 0.019 | 0.165 | -3.153 | 0.731  | 3.267 | 2.536 |
| 0.003 | 0.157 | -1.706 | -0.790 | 3.297 | 4.086 |
| 0.496 | 0.668 | -5.495 | -0.137 | 4.751 | 4.888 |
| 0.009 | 0.157 | -2.488 | -0.626 | 3.830 | 4.456 |
| 0.073 | 0.241 | -4.201 | 0.524  | 3.810 | 3.286 |
| 0.878 | 0.934 | -5.704 | 0.039  | 2.440 | 2.402 |
| 0.145 | 0.329 | -4.715 | -0.509 | 3.396 | 3.904 |
| 0.471 | 0.650 | -5.469 | 0.185  | 5.398 | 5.214 |
| 0.010 | 0.157 | -2.601 | 2.058  | 7.769 | 5.711 |
| 0.804 | 0.890 | -5.686 | -0.053 | 5.371 | 5.424 |
| 0.141 | 0.325 | -4.691 | -0.644 | 2.382 | 3.025 |
| 0.921 | 0.957 | -5.710 | 0.033  | 6.246 | 6.213 |
| 0.508 | 0.677 | -5.507 | 0.162  | 5.140 | 4.978 |
| 0.156 | 0.344 | -4.767 | 0.426  | 4.312 | 3.885 |
| 0.632 | 0.772 | -5.606 | 0.121  | 4.162 | 4.041 |
| 0.495 | 0.668 | -5.495 | -0.286 | 4.674 | 4.961 |
| 0.958 | 0.978 | -5.713 | 0.017  | 5.332 | 5.315 |
| 0.275 | 0.473 | -5.151 | 0.445  | 4.890 | 4.445 |
| 0.045 | 0.203 | -3.836 | 0.570  | 5.713 | 5.143 |
| 0.028 | 0.178 | -3.460 | -1.177 | 1.818 | 2.995 |
| 0.380 | 0.569 | -5.350 | -0.252 | 2.826 | 3.078 |

|       |       |        |        |       |       |
|-------|-------|--------|--------|-------|-------|
| 0.040 | 0.194 | -3.739 | 0.483  | 5.104 | 4.621 |
| 0.173 | 0.362 | -4.837 | 0.317  | 5.164 | 4.848 |
| 0.460 | 0.640 | -5.456 | -0.148 | 6.836 | 6.984 |
| 0.101 | 0.278 | -4.451 | 0.544  | 6.409 | 5.866 |
| 0.011 | 0.157 | -2.672 | -0.703 | 4.850 | 5.553 |
| 0.121 | 0.302 | -4.585 | 0.409  | 5.763 | 5.354 |
| 0.001 | 0.157 | -1.045 | -0.990 | 6.767 | 7.757 |
| 0.318 | 0.516 | -5.244 | 0.426  | 2.910 | 2.484 |
| 0.015 | 0.160 | -2.938 | -0.802 | 5.304 | 6.105 |
| 0.268 | 0.466 | -5.135 | -0.277 | 3.291 | 3.567 |
| 0.315 | 0.513 | -5.238 | -0.298 | 5.901 | 6.199 |
| 0.004 | 0.157 | -1.861 | 2.267  | 6.992 | 4.725 |
| 0.188 | 0.380 | -4.896 | -0.335 | 4.988 | 5.323 |
| 0.681 | 0.809 | -5.635 | 0.126  | 2.278 | 2.152 |
| 0.018 | 0.163 | -3.115 | -0.650 | 2.804 | 3.454 |
| 0.051 | 0.210 | -3.931 | -0.723 | 6.739 | 7.461 |
| 0.010 | 0.157 | -2.585 | -1.012 | 3.399 | 4.410 |
| 0.060 | 0.221 | -4.049 | -0.651 | 3.326 | 3.977 |
| 0.747 | 0.853 | -5.666 | -0.175 | 3.318 | 3.493 |
| 0.260 | 0.457 | -5.115 | -0.428 | 2.268 | 2.696 |
| 0.017 | 0.162 | -3.029 | 0.972  | 6.804 | 5.832 |
| 0.079 | 0.249 | -4.265 | 0.686  | 6.885 | 6.199 |
| 0.859 | 0.924 | -5.700 | -0.056 | 4.121 | 4.176 |
| 0.611 | 0.757 | -5.593 | 0.176  | 4.623 | 4.447 |
| 0.525 | 0.690 | -5.524 | -0.160 | 3.437 | 3.598 |
| 0.118 | 0.298 | -4.561 | 0.393  | 3.846 | 3.453 |
| 0.035 | 0.186 | -3.621 | 0.580  | 6.263 | 5.683 |
| 0.387 | 0.575 | -5.361 | 0.248  | 4.760 | 4.513 |
| 0.500 | 0.670 | -5.499 | 0.132  | 5.877 | 5.745 |
| 0.013 | 0.160 | -2.834 | 1.067  | 7.937 | 6.870 |
| 0.043 | 0.199 | -3.790 | 0.442  | 5.419 | 4.977 |
| 0.106 | 0.284 | -4.485 | 0.468  | 2.539 | 2.071 |
| 0.836 | 0.908 | -5.694 | -0.078 | 3.641 | 3.719 |
| 0.187 | 0.379 | -4.892 | 0.289  | 5.721 | 5.433 |
| 0.789 | 0.880 | -5.681 | -0.097 | 2.389 | 2.486 |
| 0.056 | 0.217 | -4.000 | -0.511 | 3.407 | 3.918 |
| 0.763 | 0.864 | -5.672 | 0.086  | 2.473 | 2.387 |
| 0.456 | 0.636 | -5.451 | -0.231 | 3.033 | 3.265 |
| 0.502 | 0.672 | -5.501 | -0.140 | 3.314 | 3.454 |
| 0.077 | 0.247 | -4.248 | -0.620 | 1.812 | 2.431 |
| 0.201 | 0.397 | -4.943 | -0.397 | 1.735 | 2.132 |
| 0.056 | 0.217 | -3.996 | -0.470 | 6.788 | 7.258 |
| 0.032 | 0.182 | -3.552 | -0.567 | 1.938 | 2.504 |
| 0.006 | 0.157 | -2.210 | 1.325  | 3.532 | 2.207 |
| 0.738 | 0.848 | -5.662 | -0.133 | 5.510 | 5.643 |
| 0.004 | 0.157 | -1.924 | 1.115  | 3.220 | 2.105 |
| 0.173 | 0.363 | -4.839 | -0.323 | 2.772 | 3.094 |
| 0.523 | 0.689 | -5.521 | -0.195 | 2.498 | 2.693 |
| 0.334 | 0.530 | -5.273 | 0.315  | 3.750 | 3.435 |
| 0.011 | 0.159 | -2.723 | 0.660  | 2.667 | 2.007 |



|       |       |        |        |       |       |
|-------|-------|--------|--------|-------|-------|
| 0.118 | 0.298 | -4.564 | -0.485 | 2.803 | 3.289 |
| 0.885 | 0.937 | -5.705 | -0.040 | 3.347 | 3.387 |
| 0.064 | 0.227 | -4.098 | 0.597  | 3.228 | 2.631 |
| 0.648 | 0.784 | -5.616 | 0.160  | 3.049 | 2.889 |
| 0.016 | 0.162 | -3.027 | -0.919 | 2.381 | 3.300 |
| 0.002 | 0.157 | -1.466 | 0.980  | 4.040 | 3.061 |
| 0.413 | 0.601 | -5.398 | 0.273  | 2.590 | 2.317 |
| 0.386 | 0.574 | -5.360 | 0.281  | 3.352 | 3.071 |
| 0.064 | 0.228 | -4.100 | 0.871  | 2.878 | 2.006 |
| 0.069 | 0.236 | -4.163 | 0.596  | 2.747 | 2.151 |
| 0.094 | 0.271 | -4.398 | 0.458  | 2.491 | 2.033 |
| 0.094 | 0.270 | -4.396 | 0.487  | 4.841 | 4.354 |
| 0.065 | 0.229 | -4.112 | -0.660 | 2.880 | 3.540 |
| 0.557 | 0.716 | -5.551 | 0.241  | 4.011 | 3.771 |
| 0.009 | 0.157 | -2.549 | -1.067 | 2.524 | 3.592 |
| 0.495 | 0.668 | -5.494 | 0.218  | 2.517 | 2.299 |
| 0.424 | 0.610 | -5.413 | 0.298  | 3.576 | 3.277 |
| 0.344 | 0.539 | -5.291 | -0.327 | 2.781 | 3.108 |
| 0.140 | 0.324 | -4.689 | -0.535 | 3.350 | 3.885 |
| 0.573 | 0.728 | -5.564 | -0.168 | 2.637 | 2.805 |
| 0.083 | 0.254 | -4.298 | -1.029 | 1.606 | 2.635 |
| 0.001 | 0.157 | -0.441 | 1.059  | 3.933 | 2.873 |
| 0.063 | 0.226 | -4.089 | 0.425  | 4.512 | 4.087 |
| 0.844 | 0.914 | -5.696 | -0.060 | 2.672 | 2.732 |
| 0.804 | 0.890 | -5.686 | 0.071  | 2.599 | 2.527 |
| 0.484 | 0.659 | -5.483 | -0.189 | 2.059 | 2.248 |
| 0.770 | 0.868 | -5.674 | 0.079  | 3.834 | 3.755 |
| 0.034 | 0.185 | -3.604 | 0.733  | 4.625 | 3.892 |
| 0.002 | 0.157 | -1.075 | 1.037  | 2.507 | 1.470 |
| 0.016 | 0.162 | -3.014 | 1.159  | 5.666 | 4.508 |
| 0.008 | 0.157 | -2.487 | 0.648  | 2.879 | 2.231 |
| 0.157 | 0.345 | -4.772 | 0.346  | 5.611 | 5.265 |
| 0.242 | 0.439 | -5.067 | -0.336 | 2.600 | 2.936 |
| 0.015 | 0.161 | -2.975 | 0.645  | 3.941 | 3.296 |
| 0.273 | 0.471 | -5.146 | 0.301  | 3.539 | 3.238 |
| 0.230 | 0.428 | -5.035 | 0.396  | 3.356 | 2.960 |
| 0.299 | 0.496 | -5.205 | -0.368 | 2.349 | 2.717 |
| 0.429 | 0.615 | -5.419 | -0.236 | 3.992 | 4.228 |
| 0.118 | 0.298 | -4.564 | 0.383  | 3.558 | 3.175 |
| 0.055 | 0.216 | -3.986 | 0.479  | 2.725 | 2.246 |
| 0.766 | 0.866 | -5.673 | -0.076 | 2.333 | 2.409 |
| 0.083 | 0.254 | -4.298 | -0.528 | 3.453 | 3.981 |
| 0.639 | 0.778 | -5.611 | 0.115  | 2.619 | 2.504 |
| 0.453 | 0.634 | -5.448 | -0.234 | 4.422 | 4.655 |
| 0.767 | 0.866 | -5.673 | 0.082  | 2.995 | 2.913 |
| 0.648 | 0.784 | -5.616 | 0.128  | 2.857 | 2.730 |
| 0.086 | 0.259 | -4.330 | -0.407 | 3.075 | 3.481 |
| 0.990 | 0.995 | -5.715 | -0.004 | 4.156 | 4.160 |
| 0.936 | 0.966 | -5.712 | -0.031 | 5.218 | 5.250 |
| 0.110 | 0.289 | -4.514 | 0.387  | 4.858 | 4.471 |

|       |       |        |        |       |       |
|-------|-------|--------|--------|-------|-------|
| 0.312 | 0.509 | -5.231 | 0.256  | 7.058 | 6.802 |
| 0.053 | 0.213 | -3.955 | -0.462 | 5.871 | 6.334 |
| 0.004 | 0.157 | -1.782 | 0.858  | 4.197 | 3.339 |
| 0.012 | 0.160 | -2.791 | -1.416 | 4.991 | 6.407 |
| 0.224 | 0.421 | -5.017 | 0.417  | 4.786 | 4.369 |
| 0.043 | 0.199 | -3.789 | -0.513 | 3.479 | 3.993 |
| 0.217 | 0.411 | -4.994 | -0.323 | 5.109 | 5.432 |
| 0.817 | 0.896 | -5.689 | 0.093  | 4.763 | 4.671 |
| 0.202 | 0.398 | -4.948 | 0.359  | 4.078 | 3.719 |
| 0.415 | 0.602 | -5.400 | 0.225  | 3.860 | 3.635 |
| 0.654 | 0.790 | -5.620 | -0.106 | 3.607 | 3.713 |
| 0.523 | 0.689 | -5.521 | 0.180  | 5.805 | 5.625 |
| 0.172 | 0.362 | -4.833 | -0.505 | 5.125 | 5.630 |
| 0.196 | 0.390 | -4.926 | -0.373 | 2.152 | 2.525 |
| 0.405 | 0.593 | -5.387 | -0.252 | 1.961 | 2.213 |
| 0.553 | 0.713 | -5.548 | -0.161 | 5.431 | 5.593 |
| 0.022 | 0.170 | -3.252 | 1.090  | 6.710 | 5.620 |
| 0.143 | 0.327 | -4.701 | 0.657  | 3.939 | 3.282 |
| 0.011 | 0.159 | -2.734 | 1.616  | 5.300 | 3.684 |
| 0.066 | 0.231 | -4.127 | -0.612 | 3.050 | 3.663 |
| 0.245 | 0.442 | -5.075 | -0.363 | 4.718 | 5.081 |
| 0.326 | 0.522 | -5.258 | 0.213  | 7.704 | 7.491 |
| 0.062 | 0.225 | -4.078 | 0.940  | 4.675 | 3.735 |
| 0.060 | 0.222 | -4.056 | 0.392  | 6.601 | 6.209 |
| 0.661 | 0.794 | -5.624 | 0.117  | 5.520 | 5.403 |
| 0.063 | 0.226 | -4.089 | 0.705  | 7.422 | 6.717 |
| 0.058 | 0.220 | -4.031 | -1.113 | 3.386 | 4.499 |
| 0.304 | 0.501 | -5.215 | -0.577 | 1.811 | 2.388 |
| 0.494 | 0.667 | -5.493 | -0.257 | 2.104 | 2.361 |
| 0.812 | 0.894 | -5.688 | 0.067  | 3.228 | 3.162 |
| 0.017 | 0.162 | -3.053 | 1.843  | 9.257 | 7.413 |
| 0.536 | 0.699 | -5.534 | -0.215 | 5.414 | 5.629 |
| 0.934 | 0.964 | -5.712 | 0.031  | 2.769 | 2.738 |
| 0.810 | 0.893 | -5.687 | 0.069  | 3.964 | 3.894 |
| 0.808 | 0.892 | -5.687 | -0.096 | 1.411 | 1.508 |
| 0.441 | 0.625 | -5.434 | 0.323  | 2.713 | 2.390 |
| 0.058 | 0.219 | -4.023 | -0.764 | 5.480 | 6.244 |
| 0.782 | 0.876 | -5.679 | 0.092  | 2.170 | 2.078 |
| 0.170 | 0.360 | -4.824 | -0.492 | 2.849 | 3.341 |
| 0.061 | 0.223 | -4.064 | -1.061 | 1.672 | 2.734 |
| 0.090 | 0.265 | -4.362 | -0.531 | 1.616 | 2.147 |
| 0.955 | 0.977 | -5.713 | 0.017  | 5.040 | 5.023 |
| 0.025 | 0.175 | -3.376 | 0.784  | 4.925 | 4.141 |
| 0.438 | 0.622 | -5.430 | -0.175 | 2.094 | 2.269 |
| 0.847 | 0.916 | -5.697 | -0.054 | 2.727 | 2.781 |
| 0.326 | 0.522 | -5.259 | -0.248 | 6.903 | 7.151 |
| 0.735 | 0.846 | -5.660 | 0.094  | 3.678 | 3.584 |
| 0.327 | 0.523 | -5.260 | -0.215 | 6.403 | 6.618 |
| 0.307 | 0.504 | -5.221 | -0.376 | 3.830 | 4.205 |
| 0.549 | 0.710 | -5.545 | -0.325 | 6.480 | 6.805 |

|       |       |        |        |       |       |
|-------|-------|--------|--------|-------|-------|
| 0.370 | 0.561 | -5.335 | -0.256 | 7.272 | 7.528 |
| 0.026 | 0.176 | -3.391 | 0.627  | 8.209 | 7.582 |
| 0.129 | 0.310 | -4.629 | 0.563  | 5.842 | 5.278 |
| 0.049 | 0.207 | -3.900 | 0.908  | 5.475 | 4.568 |
| 0.049 | 0.207 | -3.899 | -0.546 | 4.479 | 5.025 |
| 0.558 | 0.717 | -5.553 | -0.142 | 3.469 | 3.611 |
| 0.090 | 0.265 | -4.363 | 0.526  | 2.965 | 2.439 |
| 0.005 | 0.157 | -2.019 | -1.188 | 5.602 | 6.790 |
| 0.101 | 0.278 | -4.450 | 0.743  | 4.090 | 3.348 |
| 0.659 | 0.793 | -5.623 | 0.155  | 2.869 | 2.714 |
| 0.087 | 0.260 | -4.335 | 0.420  | 3.693 | 3.273 |
| 0.005 | 0.157 | -2.069 | -0.922 | 3.560 | 4.481 |
| 0.577 | 0.732 | -5.568 | -0.151 | 3.356 | 3.507 |
| 0.028 | 0.178 | -3.452 | 0.748  | 6.557 | 5.809 |
| 0.466 | 0.645 | -5.463 | 0.236  | 4.709 | 4.473 |
| 0.601 | 0.750 | -5.585 | 0.265  | 3.217 | 2.953 |
| 0.005 | 0.157 | -2.010 | -1.661 | 0.880 | 2.541 |
| 0.068 | 0.234 | -4.146 | 1.010  | 6.091 | 5.082 |
| 0.031 | 0.180 | -3.523 | -0.957 | 5.186 | 6.143 |
| 0.645 | 0.782 | -5.614 | 0.176  | 4.593 | 4.418 |
| 0.118 | 0.298 | -4.563 | 0.490  | 3.082 | 2.592 |
| 0.038 | 0.192 | -3.705 | -0.559 | 5.156 | 5.716 |
| 0.055 | 0.216 | -3.984 | 0.437  | 3.506 | 3.069 |
| 0.580 | 0.734 | -5.570 | -0.193 | 3.503 | 3.696 |
| 0.442 | 0.625 | -5.435 | -0.250 | 1.736 | 1.987 |
| 0.638 | 0.777 | -5.610 | -0.198 | 4.143 | 4.341 |
| 0.387 | 0.575 | -5.361 | 0.267  | 3.998 | 3.731 |
| 0.841 | 0.912 | -5.696 | -0.049 | 3.360 | 3.409 |
| 0.014 | 0.160 | -2.896 | -1.193 | 6.103 | 7.296 |
| 0.280 | 0.478 | -5.164 | 0.353  | 5.100 | 4.747 |
| 0.887 | 0.938 | -5.705 | 0.038  | 3.815 | 3.776 |
| 0.045 | 0.201 | -3.821 | 0.628  | 5.017 | 4.389 |
| 0.210 | 0.405 | -4.973 | 0.361  | 2.551 | 2.190 |
| 0.991 | 0.995 | -5.715 | -0.003 | 3.561 | 3.564 |
| 0.021 | 0.168 | -3.224 | 0.872  | 6.708 | 5.836 |
| 0.322 | 0.519 | -5.252 | 0.284  | 6.910 | 6.626 |
| 0.048 | 0.205 | -3.881 | -1.643 | 2.602 | 4.245 |
| 0.058 | 0.220 | -4.031 | 0.655  | 7.775 | 7.120 |
| 0.029 | 0.178 | -3.477 | -0.615 | 3.151 | 3.766 |
| 0.421 | 0.607 | -5.408 | -0.222 | 1.734 | 1.956 |
| 0.434 | 0.618 | -5.425 | 0.310  | 2.557 | 2.247 |
| 0.037 | 0.189 | -3.667 | -0.556 | 3.250 | 3.806 |
| 0.185 | 0.377 | -4.887 | -0.435 | 2.726 | 3.161 |
| 0.324 | 0.520 | -5.255 | -0.213 | 4.705 | 4.918 |
| 0.121 | 0.301 | -4.580 | 0.435  | 5.523 | 5.088 |
| 0.154 | 0.341 | -4.755 | 0.371  | 6.536 | 6.165 |
| 0.016 | 0.162 | -3.013 | -0.739 | 3.401 | 4.140 |
| 0.317 | 0.516 | -5.242 | 0.261  | 2.647 | 2.386 |
| 0.712 | 0.828 | -5.650 | -0.122 | 2.486 | 2.608 |
| 0.010 | 0.157 | -2.615 | 0.840  | 6.642 | 5.802 |

|       |       |        |        |       |       |
|-------|-------|--------|--------|-------|-------|
| 0.085 | 0.257 | -4.317 | 0.593  | 6.512 | 5.919 |
| 0.663 | 0.795 | -5.625 | -0.116 | 2.501 | 2.617 |
| 0.020 | 0.167 | -3.199 | 0.763  | 3.396 | 2.633 |
| 0.493 | 0.667 | -5.492 | 0.201  | 4.359 | 4.158 |
| 0.074 | 0.241 | -4.209 | 0.404  | 5.730 | 5.326 |
| 0.096 | 0.272 | -4.411 | 0.436  | 2.809 | 2.373 |
| 0.140 | 0.324 | -4.686 | 0.346  | 6.020 | 5.674 |
| 0.501 | 0.671 | -5.501 | 0.175  | 3.539 | 3.364 |
| 0.519 | 0.686 | -5.518 | 0.170  | 4.522 | 4.352 |
| 0.131 | 0.313 | -4.640 | 0.350  | 5.024 | 4.674 |
| 0.110 | 0.289 | -4.510 | 0.475  | 3.481 | 3.006 |
| 0.253 | 0.451 | -5.098 | 0.287  | 4.383 | 4.096 |
| 0.247 | 0.445 | -5.083 | -0.266 | 4.457 | 4.723 |
| 0.263 | 0.461 | -5.123 | -0.255 | 4.481 | 4.736 |
| 0.911 | 0.952 | -5.709 | 0.033  | 3.761 | 3.729 |
| 0.004 | 0.157 | -1.956 | -1.243 | 5.889 | 7.132 |
| 0.005 | 0.157 | -1.991 | 2.522  | 6.970 | 4.447 |
| 0.434 | 0.618 | -5.425 | -0.290 | 3.314 | 3.604 |
| 0.005 | 0.157 | -2.022 | -0.868 | 5.994 | 6.863 |
| 0.005 | 0.157 | -2.103 | -0.854 | 5.896 | 6.750 |
| 0.008 | 0.157 | -2.439 | -0.816 | 5.872 | 6.687 |
| 0.015 | 0.161 | -2.973 | -0.712 | 3.938 | 4.650 |
| 0.409 | 0.596 | -5.393 | -0.249 | 5.369 | 5.618 |
| 0.126 | 0.307 | -4.614 | 0.294  | 8.021 | 7.727 |
| 0.067 | 0.231 | -4.132 | 0.393  | 5.506 | 5.113 |
| 0.191 | 0.383 | -4.906 | 0.395  | 2.579 | 2.184 |
| 0.892 | 0.941 | -5.706 | 0.052  | 2.925 | 2.873 |
| 0.233 | 0.430 | -5.044 | 0.313  | 3.049 | 2.736 |
| 0.982 | 0.991 | -5.715 | 0.007  | 2.626 | 2.619 |
| 0.472 | 0.650 | -5.470 | -0.231 | 3.443 | 3.673 |
| 0.347 | 0.542 | -5.296 | 0.227  | 3.324 | 3.097 |
| 0.030 | 0.179 | -3.511 | 0.792  | 5.698 | 4.906 |
| 0.032 | 0.182 | -3.557 | -0.505 | 4.448 | 4.953 |
| 0.992 | 0.996 | -5.715 | -0.011 | 4.839 | 4.850 |
| 0.965 | 0.982 | -5.714 | -0.012 | 4.546 | 4.558 |
| 0.634 | 0.774 | -5.607 | -0.146 | 3.604 | 3.750 |
| 0.035 | 0.186 | -3.621 | -0.501 | 2.826 | 3.326 |
| 0.434 | 0.618 | -5.425 | 0.243  | 5.456 | 5.214 |
| 0.124 | 0.305 | -4.599 | -0.603 | 2.681 | 3.284 |
| 0.188 | 0.380 | -4.898 | -0.737 | 2.269 | 3.006 |
| 0.214 | 0.409 | -4.984 | -0.704 | 2.270 | 2.974 |
| 0.269 | 0.467 | -5.136 | 0.262  | 4.689 | 4.427 |
| 0.611 | 0.757 | -5.592 | -0.164 | 2.607 | 2.772 |
| 0.158 | 0.346 | -4.774 | -0.404 | 4.026 | 4.430 |
| 0.663 | 0.795 | -5.625 | 0.110  | 2.731 | 2.621 |
| 0.795 | 0.885 | -5.683 | 0.078  | 5.057 | 4.978 |
| 0.085 | 0.257 | -4.316 | -0.420 | 7.701 | 8.121 |
| 0.244 | 0.442 | -5.073 | 0.293  | 7.348 | 7.055 |
| 0.060 | 0.222 | -4.052 | 0.516  | 5.669 | 5.153 |

|       |       |        |        |       |       |
|-------|-------|--------|--------|-------|-------|
| 0.122 | 0.303 | -4.587 | 0.372  | 6.022 | 5.650 |
| 0.147 | 0.331 | -4.723 | -0.519 | 2.424 | 2.943 |
| 0.004 | 0.157 | -1.844 | -0.729 | 4.989 | 5.718 |
| 0.077 | 0.246 | -4.240 | 0.944  | 3.143 | 2.199 |
| 0.810 | 0.893 | -5.687 | -0.054 | 3.774 | 3.828 |
| 0.431 | 0.616 | -5.422 | -0.196 | 5.108 | 5.304 |
| 0.010 | 0.157 | -2.584 | -0.927 | 4.688 | 5.615 |
| 0.017 | 0.162 | -3.033 | 0.587  | 3.565 | 2.978 |
| 0.166 | 0.355 | -4.809 | 0.583  | 3.310 | 2.727 |
| 0.903 | 0.947 | -5.708 | 0.036  | 1.443 | 1.407 |
| 0.457 | 0.637 | -5.453 | -0.194 | 4.782 | 4.976 |
| 0.090 | 0.264 | -4.358 | 0.974  | 4.815 | 3.840 |
| 0.208 | 0.403 | -4.968 | 0.368  | 4.905 | 4.537 |
| 0.027 | 0.176 | -3.430 | 1.024  | 7.192 | 6.169 |
| 0.017 | 0.162 | -3.042 | 0.674  | 6.867 | 6.193 |
| 0.078 | 0.247 | -4.249 | 0.368  | 6.706 | 6.337 |
| 0.061 | 0.224 | -4.071 | 0.635  | 5.774 | 5.139 |
| 0.035 | 0.186 | -3.629 | 0.812  | 6.754 | 5.942 |
| 0.085 | 0.257 | -4.316 | -0.669 | 2.316 | 2.985 |
| 0.007 | 0.157 | -2.308 | 1.011  | 6.718 | 5.708 |
| 0.031 | 0.181 | -3.539 | -0.666 | 8.987 | 9.653 |
| 0.110 | 0.289 | -4.514 | -0.507 | 6.070 | 6.577 |
| 0.489 | 0.664 | -5.488 | -0.198 | 1.948 | 2.146 |
| 0.009 | 0.157 | -2.575 | 0.840  | 5.562 | 4.723 |
| 0.192 | 0.384 | -4.910 | -0.423 | 5.316 | 5.739 |
| 0.711 | 0.828 | -5.650 | -0.109 | 2.621 | 2.730 |
| 0.303 | 0.501 | -5.213 | 0.276  | 5.742 | 5.466 |
| 0.183 | 0.374 | -4.878 | 0.328  | 5.291 | 4.963 |
| 0.313 | 0.511 | -5.234 | 0.260  | 5.783 | 5.522 |
| 0.579 | 0.733 | -5.569 | 0.125  | 5.528 | 5.403 |
| 0.003 | 0.157 | -1.587 | 0.865  | 2.915 | 2.049 |
| 0.020 | 0.167 | -3.197 | -0.631 | 5.083 | 5.714 |
| 0.073 | 0.241 | -4.199 | -0.662 | 1.916 | 2.578 |
| 0.018 | 0.163 | -3.111 | -0.636 | 7.894 | 8.530 |
| 0.011 | 0.159 | -2.726 | 1.208  | 7.192 | 5.983 |
| 0.004 | 0.157 | -1.833 | 1.642  | 8.288 | 6.645 |
| 0.351 | 0.546 | -5.304 | -0.396 | 3.258 | 3.655 |
| 0.069 | 0.235 | -4.158 | 0.589  | 5.335 | 4.747 |
| 0.532 | 0.696 | -5.530 | -0.169 | 4.195 | 4.364 |
| 0.179 | 0.370 | -4.864 | -0.433 | 3.174 | 3.607 |
| 0.022 | 0.171 | -3.272 | -1.281 | 1.251 | 2.532 |
| 0.188 | 0.380 | -4.898 | -0.427 | 2.282 | 2.709 |
| 0.965 | 0.982 | -5.714 | -0.012 | 5.974 | 5.986 |
| 0.742 | 0.850 | -5.663 | -0.174 | 3.806 | 3.980 |
| 0.844 | 0.914 | -5.696 | 0.057  | 4.159 | 4.101 |
| 0.228 | 0.425 | -5.029 | 0.252  | 7.188 | 6.936 |
| 0.069 | 0.235 | -4.160 | 0.376  | 6.908 | 6.531 |
| 0.480 | 0.656 | -5.479 | -0.216 | 2.118 | 2.334 |
| 0.017 | 0.162 | -3.040 | -0.796 | 1.976 | 2.772 |
| 0.006 | 0.157 | -2.263 | 1.078  | 3.728 | 2.650 |

|       |       |        |        |       |       |
|-------|-------|--------|--------|-------|-------|
| 0.143 | 0.327 | -4.705 | 0.458  | 3.666 | 3.209 |
| 0.625 | 0.767 | -5.602 | 0.121  | 7.212 | 7.092 |
| 0.033 | 0.184 | -3.575 | 0.905  | 6.602 | 5.697 |
| 0.017 | 0.162 | -3.074 | 1.049  | 7.537 | 6.487 |
| 0.222 | 0.419 | -5.011 | -0.270 | 6.015 | 6.285 |
| 0.003 | 0.157 | -1.750 | 1.463  | 6.522 | 5.059 |
| 0.178 | 0.369 | -4.860 | -0.361 | 3.977 | 4.338 |
| 0.989 | 0.995 | -5.715 | -0.004 | 2.713 | 2.717 |
| 0.010 | 0.157 | -2.587 | 1.006  | 2.984 | 1.978 |
| 0.839 | 0.911 | -5.695 | 0.054  | 2.095 | 2.041 |
| 0.012 | 0.160 | -2.794 | 1.370  | 5.334 | 3.964 |
| 0.038 | 0.192 | -3.701 | 1.178  | 5.282 | 4.104 |
| 0.072 | 0.240 | -4.196 | 0.532  | 7.296 | 6.764 |
| 0.055 | 0.216 | -3.985 | -0.609 | 4.517 | 5.126 |
| 0.527 | 0.692 | -5.525 | -0.185 | 4.032 | 4.216 |
| 0.223 | 0.419 | -5.014 | 0.579  | 3.879 | 3.300 |
| 0.140 | 0.324 | -4.689 | 0.378  | 2.557 | 2.179 |
| 0.077 | 0.246 | -4.245 | 0.575  | 3.697 | 3.121 |
| 0.396 | 0.584 | -5.375 | 0.229  | 2.895 | 2.667 |
| 0.004 | 0.157 | -1.928 | 0.867  | 2.826 | 1.959 |
| 0.046 | 0.203 | -3.850 | -0.922 | 1.472 | 2.394 |
| 0.428 | 0.613 | -5.417 | 0.159  | 6.730 | 6.571 |
| 0.244 | 0.442 | -5.074 | 0.309  | 2.954 | 2.645 |
| 0.035 | 0.186 | -3.620 | -0.679 | 2.254 | 2.932 |
| 0.010 | 0.157 | -2.618 | 0.585  | 4.204 | 3.620 |
| 0.002 | 0.157 | -1.477 | 0.718  | 3.599 | 2.881 |
| 0.040 | 0.194 | -3.744 | 0.960  | 8.359 | 7.399 |
| 0.013 | 0.160 | -2.834 | 0.705  | 8.288 | 7.583 |
| 0.230 | 0.428 | -5.036 | -0.319 | 3.575 | 3.894 |
| 0.542 | 0.704 | -5.539 | 0.347  | 3.923 | 3.576 |
| 0.090 | 0.264 | -4.358 | -0.511 | 2.482 | 2.993 |
| 0.034 | 0.184 | -3.599 | 0.663  | 5.566 | 4.903 |
| 0.476 | 0.654 | -5.474 | -0.396 | 1.565 | 1.961 |
| 0.114 | 0.293 | -4.540 | -0.377 | 2.006 | 2.383 |
| 0.027 | 0.176 | -3.410 | -0.865 | 1.313 | 2.178 |
| 0.563 | 0.721 | -5.557 | 0.202  | 2.396 | 2.193 |
| 0.547 | 0.709 | -5.543 | -0.168 | 2.483 | 2.650 |
| 0.099 | 0.275 | -4.430 | 0.569  | 3.907 | 3.338 |
| 0.119 | 0.299 | -4.572 | 0.553  | 5.033 | 4.480 |
| 0.240 | 0.438 | -5.063 | -0.490 | 2.807 | 3.297 |
| 0.711 | 0.828 | -5.650 | 0.115  | 2.660 | 2.545 |
| 0.777 | 0.872 | -5.677 | -0.076 | 8.588 | 8.663 |
| 0.125 | 0.306 | -4.608 | 0.302  | 7.977 | 7.675 |
| 0.994 | 0.997 | -5.715 | -0.002 | 5.998 | 6.000 |
| 0.388 | 0.576 | -5.363 | -0.345 | 7.155 | 7.500 |
| 0.376 | 0.566 | -5.344 | 0.199  | 5.639 | 5.440 |
| 0.008 | 0.157 | -2.441 | -0.672 | 4.627 | 5.299 |
| 0.901 | 0.946 | -5.708 | 0.029  | 6.390 | 6.362 |
| 0.462 | 0.642 | -5.458 | 0.145  | 5.488 | 5.343 |
| 0.914 | 0.954 | -5.709 | 0.024  | 5.494 | 5.470 |

|       |       |        |        |        |       |
|-------|-------|--------|--------|--------|-------|
| 0.130 | 0.311 | -4.633 | 0.349  | 4.374  | 4.025 |
| 0.760 | 0.862 | -5.671 | 0.061  | 9.687  | 9.626 |
| 0.343 | 0.539 | -5.290 | 0.235  | 4.079  | 3.844 |
| 0.374 | 0.565 | -5.342 | 0.239  | 2.954  | 2.715 |
| 0.292 | 0.490 | -5.189 | -0.289 | 3.158  | 3.447 |
| 0.114 | 0.293 | -4.541 | -0.414 | 2.672  | 3.086 |
| 0.923 | 0.958 | -5.710 | -0.044 | 1.991  | 2.035 |
| 0.006 | 0.157 | -2.252 | -0.764 | 2.168  | 2.931 |
| 0.010 | 0.157 | -2.585 | -0.664 | 7.965  | 8.628 |
| 0.069 | 0.235 | -4.157 | 1.341  | 10.126 | 8.784 |
| 0.030 | 0.178 | -3.495 | 0.563  | 6.657  | 6.094 |
| 0.359 | 0.552 | -5.317 | 0.263  | 4.416  | 4.153 |
| 0.463 | 0.643 | -5.460 | 0.250  | 3.519  | 3.270 |
| 0.398 | 0.586 | -5.377 | -0.285 | 2.781  | 3.066 |
| 0.069 | 0.236 | -4.165 | -0.503 | 4.766  | 5.269 |
| 0.892 | 0.941 | -5.706 | -0.029 | 8.455  | 8.484 |
| 0.095 | 0.271 | -4.405 | -0.573 | 2.815  | 3.388 |
| 0.010 | 0.157 | -2.600 | 1.576  | 7.732  | 6.156 |
| 0.195 | 0.389 | -4.921 | 0.500  | 6.316  | 5.817 |
| 0.019 | 0.164 | -3.142 | -0.630 | 7.218  | 7.848 |
| 0.003 | 0.157 | -1.683 | -1.133 | 7.390  | 8.524 |
| 0.411 | 0.598 | -5.395 | -0.218 | 5.101  | 5.319 |
| 0.082 | 0.253 | -4.291 | -0.568 | 4.068  | 4.636 |
| 0.038 | 0.192 | -3.695 | 0.509  | 8.309  | 7.800 |
| 0.007 | 0.157 | -2.354 | -1.158 | 5.871  | 7.029 |
| 0.007 | 0.157 | -2.299 | -1.098 | 3.321  | 4.419 |
| 0.243 | 0.441 | -5.071 | -0.243 | 2.083  | 2.326 |
| 0.630 | 0.771 | -5.605 | 0.126  | 2.026  | 1.900 |
| 0.619 | 0.763 | -5.598 | -0.148 | 2.376  | 2.524 |
| 0.049 | 0.207 | -3.892 | 0.678  | 4.849  | 4.171 |
| 0.311 | 0.508 | -5.229 | 0.260  | 6.004  | 5.744 |
| 0.067 | 0.232 | -4.137 | 1.276  | 7.794  | 6.518 |
| 0.011 | 0.159 | -2.731 | 0.679  | 5.726  | 5.047 |
| 0.533 | 0.696 | -5.531 | 0.237  | 3.106  | 2.869 |
| 0.209 | 0.404 | -4.970 | 0.413  | 4.808  | 4.395 |
| 0.051 | 0.209 | -3.925 | -0.476 | 3.974  | 4.450 |
| 0.928 | 0.961 | -5.711 | -0.027 | 3.645  | 3.672 |
| 0.817 | 0.897 | -5.690 | 0.072  | 3.300  | 3.228 |
| 0.037 | 0.189 | -3.667 | 0.658  | 7.009  | 6.351 |
| 0.029 | 0.178 | -3.494 | 0.804  | 5.354  | 4.550 |
| 0.789 | 0.880 | -5.681 | 0.083  | 2.585  | 2.503 |
| 0.110 | 0.289 | -4.513 | 0.505  | 3.066  | 2.561 |
| 0.171 | 0.361 | -4.831 | 0.392  | 7.885  | 7.493 |
| 0.118 | 0.298 | -4.563 | 0.324  | 6.633  | 6.309 |
| 0.376 | 0.566 | -5.345 | -0.312 | 1.994  | 2.305 |
| 0.198 | 0.392 | -4.932 | 0.373  | 2.760  | 2.387 |
| 0.107 | 0.286 | -4.492 | 0.538  | 2.632  | 2.094 |
| 0.009 | 0.157 | -2.541 | 1.311  | 4.953  | 3.642 |
| 0.011 | 0.159 | -2.721 | 0.572  | 3.002  | 2.430 |
| 0.041 | 0.195 | -3.751 | 0.801  | 3.823  | 3.022 |

|       |       |        |        |       |       |
|-------|-------|--------|--------|-------|-------|
| 0.073 | 0.241 | -4.208 | -0.575 | 6.258 | 6.834 |
| 0.080 | 0.251 | -4.274 | -0.995 | 2.883 | 3.877 |
| 0.044 | 0.201 | -3.811 | -0.553 | 6.151 | 6.704 |
| 0.005 | 0.157 | -2.081 | -1.074 | 4.667 | 5.741 |
| 0.010 | 0.157 | -2.646 | 1.476  | 4.840 | 3.365 |
| 0.133 | 0.316 | -4.653 | 0.537  | 2.796 | 2.259 |
| 0.052 | 0.211 | -3.941 | 1.272  | 6.619 | 5.346 |
| 0.885 | 0.937 | -5.705 | 0.049  | 4.429 | 4.380 |
| 0.877 | 0.933 | -5.703 | 0.048  | 5.799 | 5.751 |
| 0.130 | 0.311 | -4.632 | -0.444 | 6.339 | 6.783 |
| 0.031 | 0.181 | -3.538 | 0.643  | 4.394 | 3.752 |
| 0.276 | 0.474 | -5.154 | 0.659  | 4.669 | 4.010 |
| 0.224 | 0.421 | -5.018 | 0.265  | 6.821 | 6.556 |
| 0.361 | 0.553 | -5.321 | -0.524 | 1.086 | 1.610 |
| 0.997 | 0.998 | -5.715 | 0.001  | 8.878 | 8.878 |
| 0.500 | 0.671 | -5.500 | 0.164  | 5.231 | 5.068 |
| 0.027 | 0.176 | -3.416 | -0.550 | 2.889 | 3.439 |
| 0.004 | 0.157 | -1.965 | -0.878 | 3.465 | 4.343 |
| 0.852 | 0.920 | -5.698 | 0.046  | 5.156 | 5.110 |
| 0.015 | 0.160 | -2.925 | -0.823 | 5.825 | 6.648 |
| 0.133 | 0.316 | -4.651 | -0.468 | 2.131 | 2.599 |
| 0.345 | 0.540 | -5.294 | 0.299  | 7.403 | 7.104 |
| 0.182 | 0.374 | -4.876 | -0.390 | 5.057 | 5.447 |
| 0.890 | 0.940 | -5.706 | 0.043  | 5.434 | 5.391 |
| 0.296 | 0.493 | -5.199 | -0.280 | 3.236 | 3.516 |
| 0.018 | 0.162 | -3.088 | -0.634 | 5.275 | 5.909 |
| 0.039 | 0.192 | -3.710 | 0.825  | 5.796 | 4.971 |
| 0.171 | 0.361 | -4.830 | 0.408  | 4.315 | 3.907 |
| 0.333 | 0.528 | -5.271 | 0.214  | 7.032 | 6.818 |
| 0.168 | 0.358 | -4.817 | 0.330  | 6.568 | 6.238 |
| 0.498 | 0.670 | -5.498 | 0.199  | 3.229 | 3.030 |
| 0.088 | 0.261 | -4.342 | -0.366 | 4.819 | 5.185 |
| 0.046 | 0.203 | -3.840 | 0.706  | 5.676 | 4.970 |
| 0.318 | 0.516 | -5.243 | 0.366  | 5.298 | 4.932 |
| 0.286 | 0.484 | -5.177 | 0.438  | 4.697 | 4.258 |
| 0.234 | 0.431 | -5.047 | 0.307  | 8.060 | 7.754 |
| 0.046 | 0.203 | -3.852 | 0.430  | 6.004 | 5.574 |
| 0.852 | 0.920 | -5.698 | -0.051 | 4.266 | 4.317 |
| 0.013 | 0.160 | -2.838 | -0.609 | 2.102 | 2.711 |
| 0.400 | 0.588 | -5.380 | -0.203 | 4.654 | 4.858 |
| 0.075 | 0.244 | -4.224 | 0.467  | 7.695 | 7.229 |
| 0.066 | 0.230 | -4.124 | 0.477  | 7.192 | 6.715 |
| 0.058 | 0.219 | -4.020 | 0.419  | 7.971 | 7.552 |
| 0.135 | 0.318 | -4.660 | 0.375  | 4.111 | 3.736 |
| 0.619 | 0.763 | -5.598 | -0.184 | 2.923 | 3.107 |
| 0.975 | 0.988 | -5.714 | -0.010 | 2.028 | 2.038 |
| 0.204 | 0.399 | -4.952 | -0.818 | 1.530 | 2.348 |
| 0.276 | 0.475 | -5.155 | -0.400 | 2.153 | 2.552 |
| 0.122 | 0.303 | -4.589 | -0.519 | 3.520 | 4.040 |
| 0.164 | 0.353 | -4.799 | 0.335  | 7.530 | 7.195 |



|       |       |        |        |       |       |
|-------|-------|--------|--------|-------|-------|
| 0.834 | 0.907 | -5.694 | 0.048  | 7.213 | 7.165 |
| 0.496 | 0.668 | -5.496 | -0.152 | 5.607 | 5.759 |
| 0.062 | 0.226 | -4.083 | -0.941 | 2.504 | 3.446 |
| 0.580 | 0.734 | -5.569 | 0.170  | 2.790 | 2.619 |
| 0.416 | 0.603 | -5.401 | -0.323 | 2.972 | 3.295 |
| 0.961 | 0.980 | -5.714 | 0.044  | 4.543 | 4.499 |
| 0.712 | 0.828 | -5.650 | -0.130 | 4.389 | 4.520 |
| 0.009 | 0.157 | -2.500 | 0.690  | 5.050 | 4.360 |
| 0.052 | 0.212 | -3.946 | -0.901 | 3.358 | 4.259 |
| 0.010 | 0.157 | -2.653 | -0.771 | 8.757 | 9.528 |
| 0.446 | 0.628 | -5.439 | 0.362  | 6.891 | 6.529 |
| 0.190 | 0.383 | -4.905 | -0.403 | 3.550 | 3.953 |
| 0.348 | 0.543 | -5.298 | 0.308  | 4.090 | 3.782 |
| 0.657 | 0.792 | -5.621 | -0.194 | 7.124 | 7.318 |
| 0.068 | 0.234 | -4.149 | 0.911  | 8.434 | 7.523 |
| 0.984 | 0.991 | -5.715 | 0.006  | 3.421 | 3.415 |
| 0.671 | 0.802 | -5.629 | 0.106  | 3.492 | 3.386 |
| 0.445 | 0.627 | -5.438 | -0.154 | 8.207 | 8.360 |
| 0.126 | 0.307 | -4.613 | -0.437 | 4.927 | 5.363 |
| 0.875 | 0.932 | -5.703 | 0.063  | 2.407 | 2.344 |
| 0.335 | 0.531 | -5.275 | 0.454  | 2.659 | 2.206 |
| 0.025 | 0.175 | -3.368 | 0.444  | 4.396 | 3.952 |
| 0.183 | 0.374 | -4.878 | 0.361  | 5.136 | 4.775 |
| 0.279 | 0.477 | -5.160 | -0.351 | 7.916 | 8.267 |
| 0.678 | 0.808 | -5.633 | -0.090 | 4.389 | 4.479 |
| 0.612 | 0.757 | -5.593 | -0.175 | 2.170 | 2.344 |
| 0.048 | 0.205 | -3.884 | 0.608  | 3.992 | 3.384 |
| 0.002 | 0.157 | -1.448 | -1.037 | 4.005 | 5.042 |
| 0.026 | 0.176 | -3.405 | 0.607  | 6.455 | 5.847 |
| 0.293 | 0.491 | -5.193 | -0.394 | 4.277 | 4.671 |
| 0.182 | 0.374 | -4.876 | 0.379  | 3.106 | 2.727 |
| 0.075 | 0.245 | -4.228 | 0.805  | 6.086 | 5.281 |
| 0.019 | 0.164 | -3.141 | 1.097  | 6.138 | 5.041 |
| 0.055 | 0.216 | -3.992 | 0.886  | 5.982 | 5.097 |
| 0.061 | 0.223 | -4.060 | 1.068  | 5.935 | 4.867 |
| 0.005 | 0.157 | -2.126 | 0.862  | 8.701 | 7.839 |
| 0.768 | 0.867 | -5.674 | 0.071  | 7.345 | 7.275 |
| 0.024 | 0.173 | -3.322 | -0.877 | 4.245 | 5.122 |
| 0.724 | 0.838 | -5.656 | 0.079  | 2.778 | 2.698 |
| 0.149 | 0.334 | -4.733 | 0.464  | 3.298 | 2.834 |
| 0.897 | 0.943 | -5.707 | -0.041 | 6.004 | 6.046 |
| 0.617 | 0.761 | -5.596 | 0.167  | 5.223 | 5.055 |
| 0.041 | 0.196 | -3.765 | 0.851  | 4.719 | 3.868 |
| 0.706 | 0.825 | -5.647 | -0.104 | 2.530 | 2.634 |
| 0.027 | 0.176 | -3.417 | 0.560  | 7.138 | 6.578 |
| 0.115 | 0.294 | -4.544 | -0.446 | 3.016 | 3.462 |
| 0.548 | 0.709 | -5.544 | 0.141  | 5.434 | 5.292 |
| 0.034 | 0.184 | -3.602 | 0.833  | 7.503 | 6.670 |
| 0.767 | 0.867 | -5.673 | -0.080 | 4.546 | 4.626 |
| 0.280 | 0.478 | -5.163 | -0.385 | 3.016 | 3.401 |

|       |       |        |        |       |       |
|-------|-------|--------|--------|-------|-------|
| 0.017 | 0.162 | -3.033 | 0.618  | 5.219 | 4.602 |
| 0.019 | 0.164 | -3.123 | 0.699  | 4.369 | 3.671 |
| 0.492 | 0.666 | -5.492 | 0.132  | 6.033 | 5.901 |
| 0.998 | 0.999 | -5.715 | -0.001 | 3.756 | 3.757 |
| 0.368 | 0.559 | -5.331 | 0.174  | 8.146 | 7.972 |
| 0.781 | 0.874 | -5.678 | -0.103 | 5.126 | 5.229 |
| 0.056 | 0.217 | -3.995 | 0.464  | 3.368 | 2.904 |
| 0.597 | 0.747 | -5.582 | -0.192 | 3.906 | 4.099 |
| 0.097 | 0.273 | -4.417 | 0.539  | 6.463 | 5.924 |
| 0.129 | 0.311 | -4.631 | 0.934  | 8.058 | 7.124 |
| 0.057 | 0.219 | -4.019 | 1.007  | 6.207 | 5.200 |
| 0.020 | 0.167 | -3.182 | -0.595 | 7.165 | 7.760 |
| 0.374 | 0.564 | -5.340 | -0.281 | 1.999 | 2.280 |
| 0.216 | 0.411 | -4.991 | 0.373  | 4.608 | 4.235 |
| 0.011 | 0.157 | -2.702 | 0.586  | 4.001 | 3.415 |
| 0.105 | 0.283 | -4.479 | 0.647  | 5.670 | 5.023 |
| 0.468 | 0.647 | -5.465 | -0.195 | 3.808 | 4.003 |
| 0.879 | 0.934 | -5.704 | -0.043 | 8.400 | 8.442 |
| 0.008 | 0.157 | -2.442 | -0.987 | 6.531 | 7.518 |
| 0.061 | 0.223 | -4.063 | 1.009  | 7.936 | 6.926 |
| 0.229 | 0.426 | -5.031 | 0.346  | 4.055 | 3.708 |
| 0.964 | 0.982 | -5.714 | -0.011 | 2.720 | 2.731 |
| 0.007 | 0.157 | -2.296 | -1.294 | 5.680 | 6.974 |
| 0.875 | 0.932 | -5.703 | -0.043 | 6.834 | 6.878 |
| 0.073 | 0.241 | -4.203 | 0.903  | 7.544 | 6.642 |
| 0.424 | 0.610 | -5.413 | -0.231 | 6.504 | 6.734 |
| 0.806 | 0.891 | -5.686 | 0.054  | 5.957 | 5.904 |
| 0.950 | 0.974 | -5.713 | -0.018 | 3.025 | 3.043 |
| 0.061 | 0.223 | -4.061 | -0.437 | 6.381 | 6.817 |
| 0.727 | 0.840 | -5.657 | 0.118  | 3.900 | 3.781 |
| 0.876 | 0.933 | -5.703 | -0.042 | 6.046 | 6.088 |
| 0.794 | 0.884 | -5.683 | -0.068 | 4.041 | 4.110 |
| 0.463 | 0.643 | -5.460 | -0.205 | 2.759 | 2.963 |
| 0.123 | 0.304 | -4.596 | -0.762 | 4.048 | 4.810 |
| 0.978 | 0.989 | -5.714 | 0.008  | 3.412 | 3.404 |
| 0.104 | 0.281 | -4.470 | -0.399 | 5.549 | 5.948 |
| 0.262 | 0.460 | -5.121 | -0.243 | 4.571 | 4.814 |
| 0.037 | 0.190 | -3.674 | 0.549  | 5.247 | 4.698 |
| 0.036 | 0.188 | -3.650 | 0.649  | 5.691 | 5.042 |
| 0.283 | 0.481 | -5.171 | 0.453  | 5.420 | 4.967 |
| 0.291 | 0.489 | -5.188 | -0.248 | 4.318 | 4.566 |
| 0.755 | 0.858 | -5.669 | -0.094 | 6.747 | 6.841 |
| 0.659 | 0.793 | -5.622 | 0.182  | 1.773 | 1.591 |
| 0.123 | 0.304 | -4.592 | -0.692 | 1.374 | 2.066 |
| 0.210 | 0.405 | -4.974 | 0.387  | 2.841 | 2.455 |
| 0.035 | 0.186 | -3.630 | 1.189  | 5.984 | 4.795 |
| 0.075 | 0.244 | -4.226 | 0.756  | 4.171 | 3.415 |
| 0.011 | 0.157 | -2.661 | 1.929  | 7.197 | 5.268 |
| 0.216 | 0.411 | -4.993 | -0.349 | 6.837 | 7.185 |
| 0.096 | 0.272 | -4.411 | 0.470  | 6.038 | 5.567 |

|       |       |        |        |       |       |
|-------|-------|--------|--------|-------|-------|
| 0.781 | 0.874 | -5.678 | -0.119 | 4.659 | 4.778 |
| 0.533 | 0.696 | -5.531 | -0.186 | 4.146 | 4.332 |
| 0.700 | 0.821 | -5.645 | 0.097  | 5.245 | 5.148 |
| 0.311 | 0.508 | -5.230 | -0.259 | 1.975 | 2.234 |
| 0.028 | 0.178 | -3.465 | 0.632  | 5.335 | 4.702 |
| 0.822 | 0.899 | -5.691 | 0.064  | 3.011 | 2.946 |
| 0.002 | 0.157 | -1.387 | -1.291 | 4.585 | 5.875 |
| 0.488 | 0.663 | -5.487 | -0.236 | 3.237 | 3.474 |
| 0.014 | 0.160 | -2.883 | -1.046 | 8.704 | 9.750 |
| 0.136 | 0.320 | -4.669 | -0.907 | 4.394 | 5.300 |
| 0.529 | 0.694 | -5.527 | -0.177 | 7.552 | 7.729 |
| 0.226 | 0.423 | -5.022 | 0.360  | 7.165 | 6.806 |
| 0.018 | 0.163 | -3.114 | -1.322 | 4.906 | 6.229 |
| 0.037 | 0.190 | -3.680 | -0.498 | 3.037 | 3.535 |
| 0.926 | 0.960 | -5.711 | -0.026 | 3.695 | 3.721 |
| 0.132 | 0.315 | -4.645 | 0.824  | 6.006 | 5.182 |
| 0.012 | 0.160 | -2.786 | -0.696 | 2.500 | 3.196 |
| 0.157 | 0.345 | -4.769 | -0.422 | 2.591 | 3.013 |
| 0.297 | 0.493 | -5.200 | -0.271 | 3.428 | 3.699 |
| 0.039 | 0.192 | -3.710 | 0.570  | 6.793 | 6.223 |
| 0.104 | 0.281 | -4.466 | 0.411  | 4.471 | 4.061 |
| 0.043 | 0.200 | -3.796 | 0.904  | 7.238 | 6.334 |
| 0.152 | 0.338 | -4.745 | -0.527 | 1.953 | 2.480 |
| 0.378 | 0.568 | -5.348 | -0.280 | 3.512 | 3.793 |
| 0.117 | 0.297 | -4.556 | 0.499  | 7.410 | 6.912 |
| 0.089 | 0.264 | -4.355 | 0.435  | 2.932 | 2.497 |
| 0.896 | 0.943 | -5.707 | -0.032 | 3.161 | 3.192 |
| 0.053 | 0.213 | -3.956 | 0.562  | 4.888 | 4.326 |
| 0.014 | 0.160 | -2.923 | 1.445  | 7.761 | 6.316 |
| 0.183 | 0.374 | -4.879 | 0.464  | 6.402 | 5.937 |
| 0.082 | 0.253 | -4.287 | 0.596  | 3.305 | 2.710 |
| 0.029 | 0.178 | -3.485 | 0.967  | 6.227 | 5.260 |
| 0.111 | 0.290 | -4.518 | 0.405  | 4.609 | 4.205 |
| 0.001 | 0.157 | -0.804 | 1.966  | 7.391 | 5.424 |
| 0.142 | 0.326 | -4.696 | -0.382 | 6.083 | 6.465 |
| 0.258 | 0.456 | -5.111 | -0.301 | 3.442 | 3.744 |
| 0.012 | 0.160 | -2.781 | 1.345  | 6.131 | 4.786 |
| 0.040 | 0.194 | -3.726 | -0.657 | 3.173 | 3.830 |
| 0.073 | 0.240 | -4.198 | 0.521  | 4.184 | 3.662 |
| 0.104 | 0.281 | -4.466 | -0.414 | 5.629 | 6.043 |
| 0.723 | 0.837 | -5.655 | 0.087  | 3.148 | 3.061 |
| 0.461 | 0.642 | -5.458 | -0.194 | 3.053 | 3.247 |
| 0.260 | 0.457 | -5.115 | 0.295  | 7.436 | 7.141 |
| 0.505 | 0.674 | -5.504 | -0.199 | 5.351 | 5.550 |
| 0.632 | 0.772 | -5.606 | -0.167 | 2.142 | 2.309 |
| 0.073 | 0.241 | -4.204 | -0.431 | 4.422 | 4.853 |
| 0.170 | 0.360 | -4.826 | -0.362 | 7.785 | 8.147 |
| 0.008 | 0.157 | -2.390 | -1.328 | 4.536 | 5.864 |
| 0.796 | 0.885 | -5.683 | 0.062  | 7.626 | 7.564 |
| 0.014 | 0.160 | -2.890 | 1.063  | 6.634 | 5.572 |

|       |       |        |        |       |       |
|-------|-------|--------|--------|-------|-------|
| 0.067 | 0.232 | -4.140 | 0.519  | 2.856 | 2.338 |
| 0.045 | 0.201 | -3.823 | -0.532 | 3.408 | 3.940 |
| 0.512 | 0.680 | -5.512 | -0.200 | 4.014 | 4.214 |
| 0.026 | 0.176 | -3.396 | 1.274  | 5.934 | 4.660 |
| 0.090 | 0.264 | -4.360 | 0.370  | 7.774 | 7.404 |
| 0.395 | 0.582 | -5.372 | -0.172 | 3.211 | 3.383 |
| 0.756 | 0.859 | -5.669 | -0.089 | 5.305 | 5.394 |
| 0.015 | 0.160 | -2.933 | -1.062 | 7.416 | 8.478 |
| 0.213 | 0.408 | -4.981 | 0.369  | 6.110 | 5.741 |
| 0.663 | 0.795 | -5.625 | 0.144  | 2.527 | 2.383 |
| 0.647 | 0.784 | -5.616 | 0.156  | 4.770 | 4.614 |
| 0.048 | 0.205 | -3.879 | 0.690  | 4.594 | 3.905 |
| 0.173 | 0.362 | -4.837 | 0.322  | 4.097 | 3.774 |
| 0.235 | 0.432 | -5.048 | -0.503 | 7.541 | 8.044 |
| 0.202 | 0.397 | -4.946 | 0.337  | 8.190 | 7.853 |
| 0.014 | 0.160 | -2.915 | 0.611  | 4.864 | 4.253 |
| 0.513 | 0.681 | -5.512 | 0.156  | 6.153 | 5.997 |
| 0.033 | 0.184 | -3.588 | -1.005 | 3.301 | 4.305 |
| 0.052 | 0.210 | -3.935 | -0.684 | 3.068 | 3.753 |
| 0.042 | 0.198 | -3.781 | 0.578  | 5.941 | 5.363 |
| 0.171 | 0.361 | -4.831 | 0.339  | 6.334 | 5.996 |
| 0.428 | 0.614 | -5.418 | -0.162 | 6.202 | 6.364 |
| 0.953 | 0.976 | -5.713 | -0.017 | 6.144 | 6.161 |
| 0.109 | 0.288 | -4.504 | 0.388  | 6.783 | 6.395 |
| 0.018 | 0.163 | -3.099 | 0.901  | 4.265 | 3.364 |
| 0.113 | 0.292 | -4.533 | 0.402  | 5.642 | 5.240 |
| 0.489 | 0.664 | -5.488 | 0.211  | 5.053 | 4.842 |
| 0.216 | 0.411 | -4.993 | -0.360 | 4.687 | 5.047 |
| 0.002 | 0.157 | -1.167 | -0.983 | 3.269 | 4.251 |
| 0.674 | 0.804 | -5.631 | -0.129 | 4.515 | 4.644 |
| 0.184 | 0.375 | -4.882 | 0.751  | 6.197 | 5.446 |
| 0.805 | 0.890 | -5.686 | 0.067  | 3.791 | 3.725 |
| 0.141 | 0.324 | -4.691 | -0.698 | 1.915 | 2.613 |
| 0.007 | 0.157 | -2.305 | 1.121  | 8.061 | 6.940 |
| 0.357 | 0.551 | -5.313 | -0.432 | 3.382 | 3.813 |
| 0.319 | 0.517 | -5.246 | 0.286  | 2.744 | 2.459 |
| 0.136 | 0.319 | -4.668 | 0.468  | 8.795 | 8.327 |
| 0.478 | 0.655 | -5.476 | 0.144  | 8.150 | 8.006 |
| 0.004 | 0.157 | -1.942 | -1.552 | 5.463 | 7.015 |
| 0.084 | 0.256 | -4.314 | -0.476 | 5.010 | 5.486 |
| 0.158 | 0.346 | -4.774 | 0.659  | 7.346 | 6.687 |
| 0.534 | 0.697 | -5.532 | 0.200  | 4.947 | 4.747 |
| 0.443 | 0.626 | -5.436 | 0.227  | 6.124 | 5.897 |
| 0.171 | 0.361 | -4.831 | -0.344 | 3.887 | 4.231 |
| 0.460 | 0.640 | -5.456 | 0.235  | 3.253 | 3.018 |
| 0.717 | 0.832 | -5.652 | -0.084 | 3.635 | 3.719 |
| 0.101 | 0.278 | -4.444 | -0.607 | 6.022 | 6.628 |
| 0.243 | 0.441 | -5.071 | 0.240  | 7.790 | 7.550 |
| 0.209 | 0.404 | -4.971 | 0.354  | 5.340 | 4.986 |
| 0.006 | 0.157 | -2.256 | 0.968  | 7.645 | 6.677 |

|       |       |        |        |       |       |
|-------|-------|--------|--------|-------|-------|
| 0.383 | 0.572 | -5.354 | -0.265 | 4.734 | 4.999 |
| 0.109 | 0.288 | -4.506 | -0.430 | 2.873 | 3.304 |
| 0.393 | 0.581 | -5.370 | -0.337 | 6.172 | 6.509 |
| 0.822 | 0.899 | -5.691 | 0.064  | 4.399 | 4.335 |
| 0.303 | 0.501 | -5.213 | 0.338  | 3.595 | 3.257 |
| 0.085 | 0.258 | -4.323 | -0.431 | 2.826 | 3.257 |
| 0.179 | 0.370 | -4.864 | -0.309 | 4.754 | 5.062 |
| 0.035 | 0.186 | -3.623 | 0.529  | 6.991 | 6.462 |
| 0.351 | 0.546 | -5.303 | 0.261  | 3.386 | 3.125 |
| 0.275 | 0.473 | -5.151 | 0.287  | 8.083 | 7.796 |
| 0.095 | 0.271 | -4.404 | -0.464 | 2.715 | 3.179 |
| 0.065 | 0.229 | -4.117 | -0.628 | 3.590 | 4.218 |
| 0.008 | 0.157 | -2.441 | 0.763  | 6.968 | 6.205 |
| 0.815 | 0.896 | -5.689 | -0.073 | 4.718 | 4.791 |
| 0.709 | 0.827 | -5.649 | 0.130  | 4.773 | 4.643 |
| 0.698 | 0.820 | -5.644 | -0.092 | 5.231 | 5.323 |
| 0.063 | 0.227 | -4.092 | 0.465  | 5.038 | 4.574 |
| 0.411 | 0.598 | -5.395 | 0.249  | 4.538 | 4.289 |
| 0.069 | 0.236 | -4.162 | 0.545  | 6.109 | 5.564 |
| 0.100 | 0.277 | -4.442 | 0.396  | 5.943 | 5.548 |
| 0.214 | 0.409 | -4.985 | -0.351 | 3.976 | 4.327 |
| 0.059 | 0.221 | -4.046 | 0.900  | 5.430 | 4.530 |
| 0.956 | 0.978 | -5.713 | 0.015  | 2.957 | 2.942 |
| 0.099 | 0.276 | -4.436 | 0.648  | 6.964 | 6.316 |
| 0.942 | 0.969 | -5.712 | -0.028 | 5.539 | 5.567 |
| 0.079 | 0.249 | -4.266 | 0.388  | 6.636 | 6.248 |
| 0.003 | 0.157 | -1.726 | 1.270  | 6.329 | 5.059 |
| 0.567 | 0.723 | -5.560 | 0.174  | 2.826 | 2.652 |
| 0.008 | 0.157 | -2.386 | 1.646  | 7.508 | 5.863 |
| 0.176 | 0.366 | -4.851 | 0.478  | 3.896 | 3.419 |
| 0.289 | 0.488 | -5.184 | 0.226  | 7.777 | 7.552 |
| 0.016 | 0.162 | -2.985 | 0.916  | 6.947 | 6.031 |
| 0.077 | 0.246 | -4.239 | 0.445  | 9.763 | 9.319 |
| 0.707 | 0.826 | -5.648 | -0.118 | 2.620 | 2.737 |
| 0.010 | 0.157 | -2.614 | -0.694 | 5.331 | 6.025 |
| 0.670 | 0.801 | -5.629 | -0.099 | 2.552 | 2.651 |
| 0.810 | 0.893 | -5.687 | 0.074  | 2.670 | 2.596 |
| 0.629 | 0.770 | -5.604 | 0.111  | 6.982 | 6.871 |
| 0.704 | 0.824 | -5.646 | -0.113 | 2.606 | 2.719 |
| 0.322 | 0.519 | -5.252 | -0.272 | 2.671 | 2.943 |
| 0.015 | 0.160 | -2.936 | 0.588  | 5.782 | 5.194 |
| 0.011 | 0.159 | -2.719 | 0.772  | 5.423 | 4.651 |
| 0.419 | 0.606 | -5.405 | -0.330 | 6.392 | 6.722 |
| 0.461 | 0.642 | -5.458 | -0.214 | 3.110 | 3.325 |
| 0.012 | 0.160 | -2.758 | -0.693 | 5.193 | 5.886 |
| 0.480 | 0.656 | -5.478 | -0.194 | 4.137 | 4.330 |
| 0.884 | 0.937 | -5.705 | -0.037 | 4.606 | 4.643 |
| 0.006 | 0.157 | -2.241 | 1.025  | 3.752 | 2.726 |
| 0.024 | 0.173 | -3.330 | 0.752  | 3.565 | 2.813 |
| 0.020 | 0.167 | -3.178 | -0.774 | 3.338 | 4.112 |

|       |       |        |        |       |       |
|-------|-------|--------|--------|-------|-------|
| 0.038 | 0.192 | -3.695 | -0.430 | 4.376 | 4.806 |
| 0.814 | 0.895 | -5.689 | 0.053  | 5.453 | 5.400 |
| 0.800 | 0.888 | -5.684 | 0.073  | 2.934 | 2.861 |
| 0.078 | 0.247 | -4.249 | 0.411  | 7.438 | 7.027 |
| 0.858 | 0.924 | -5.700 | -0.058 | 5.121 | 5.179 |
| 0.094 | 0.270 | -4.392 | 0.699  | 4.623 | 3.924 |
| 0.059 | 0.221 | -4.038 | 0.495  | 5.214 | 4.719 |
| 0.406 | 0.594 | -5.388 | -0.298 | 2.889 | 3.187 |
| 0.093 | 0.269 | -4.389 | 0.406  | 5.275 | 4.869 |
| 0.685 | 0.811 | -5.637 | -0.247 | 1.765 | 2.012 |
| 0.030 | 0.179 | -3.500 | 0.517  | 7.144 | 6.627 |
| 0.082 | 0.253 | -4.290 | -0.461 | 4.527 | 4.988 |
| 0.280 | 0.478 | -5.164 | 0.272  | 6.565 | 6.293 |
| 0.773 | 0.869 | -5.675 | 0.083  | 4.216 | 4.133 |
| 0.015 | 0.160 | -2.928 | -0.965 | 2.985 | 3.951 |
| 0.441 | 0.625 | -5.434 | 0.209  | 2.925 | 2.716 |
| 0.012 | 0.160 | -2.777 | -0.898 | 3.074 | 3.973 |
| 0.544 | 0.706 | -5.541 | -0.229 | 2.136 | 2.364 |
| 0.501 | 0.671 | -5.501 | 0.183  | 3.421 | 3.237 |
| 0.666 | 0.798 | -5.626 | -0.158 | 3.536 | 3.695 |
| 0.020 | 0.166 | -3.164 | 0.753  | 5.182 | 4.429 |
| 0.084 | 0.256 | -4.313 | 0.783  | 3.117 | 2.335 |
| 0.656 | 0.791 | -5.621 | -0.171 | 2.729 | 2.900 |
| 0.925 | 0.959 | -5.711 | 0.029  | 2.656 | 2.626 |
| 0.005 | 0.157 | -2.103 | 0.801  | 3.684 | 2.883 |
| 0.201 | 0.396 | -4.943 | -0.510 | 4.499 | 5.009 |
| 0.541 | 0.703 | -5.538 | -0.193 | 4.060 | 4.253 |
| 0.341 | 0.537 | -5.287 | -0.215 | 2.923 | 3.137 |
| 0.816 | 0.896 | -5.689 | -0.062 | 2.115 | 2.177 |
| 0.744 | 0.851 | -5.664 | -0.132 | 3.270 | 3.402 |
| 0.004 | 0.157 | -1.877 | 0.942  | 8.198 | 7.257 |
| 0.161 | 0.349 | -4.786 | 0.504  | 5.145 | 4.641 |
| 0.006 | 0.157 | -2.169 | -1.029 | 4.563 | 5.592 |
| 0.028 | 0.178 | -3.465 | 0.838  | 6.353 | 5.515 |
| 0.893 | 0.942 | -5.706 | -0.078 | 4.338 | 4.416 |
| 0.506 | 0.675 | -5.506 | 0.249  | 4.648 | 4.399 |
| 0.701 | 0.822 | -5.645 | 0.143  | 3.417 | 3.273 |
| 0.026 | 0.176 | -3.408 | 0.686  | 6.663 | 5.977 |
| 0.360 | 0.553 | -5.319 | -0.278 | 4.117 | 4.395 |
| 0.964 | 0.982 | -5.714 | 0.013  | 4.285 | 4.273 |
| 0.349 | 0.544 | -5.300 | 0.354  | 5.121 | 4.767 |
| 0.001 | 0.157 | -0.873 | 1.283  | 5.976 | 4.693 |
| 0.104 | 0.281 | -4.471 | 0.687  | 3.116 | 2.430 |
| 0.328 | 0.524 | -5.263 | 0.303  | 2.698 | 2.395 |
| 0.017 | 0.162 | -3.055 | 1.066  | 6.126 | 5.059 |
| 0.227 | 0.424 | -5.024 | -0.338 | 4.230 | 4.568 |
| 0.410 | 0.597 | -5.394 | -0.217 | 3.621 | 3.838 |
| 0.634 | 0.774 | -5.608 | 0.127  | 2.282 | 2.155 |
| 0.964 | 0.982 | -5.714 | -0.013 | 2.306 | 2.319 |
| 0.393 | 0.581 | -5.370 | 0.236  | 5.066 | 4.830 |

|       |       |        |        |       |       |
|-------|-------|--------|--------|-------|-------|
| 0.621 | 0.765 | -5.599 | 0.146  | 3.850 | 3.704 |
| 0.188 | 0.380 | -4.897 | 0.578  | 3.792 | 3.214 |
| 0.803 | 0.889 | -5.685 | 0.052  | 4.380 | 4.327 |
| 0.334 | 0.530 | -5.273 | 0.247  | 7.418 | 7.171 |
| 0.224 | 0.421 | -5.018 | -0.425 | 1.987 | 2.412 |
| 0.964 | 0.982 | -5.714 | -0.012 | 3.713 | 3.725 |
| 0.633 | 0.773 | -5.607 | 0.135  | 2.878 | 2.743 |
| 0.014 | 0.160 | -2.884 | -0.768 | 2.529 | 3.297 |
| 0.776 | 0.871 | -5.676 | 0.084  | 2.456 | 2.372 |
| 0.094 | 0.270 | -4.392 | -0.493 | 4.933 | 5.427 |
| 0.834 | 0.907 | -5.694 | -0.056 | 2.847 | 2.903 |
| 0.442 | 0.625 | -5.435 | 0.227  | 2.820 | 2.593 |
| 0.679 | 0.808 | -5.634 | -0.112 | 3.116 | 3.229 |
| 0.070 | 0.236 | -4.168 | -0.495 | 7.447 | 7.942 |
| 0.167 | 0.356 | -4.813 | -0.511 | 3.262 | 3.773 |
| 0.006 | 0.157 | -2.253 | 1.012  | 5.944 | 4.932 |
| 0.354 | 0.548 | -5.308 | -0.259 | 5.451 | 5.710 |
| 0.548 | 0.709 | -5.544 | -0.165 | 4.960 | 5.125 |
| 0.162 | 0.350 | -4.790 | 0.346  | 7.772 | 7.426 |
| 0.972 | 0.986 | -5.714 | -0.014 | 4.534 | 4.548 |
| 0.574 | 0.729 | -5.566 | 0.107  | 5.700 | 5.593 |
| 0.117 | 0.297 | -4.559 | 0.368  | 5.663 | 5.295 |
| 0.034 | 0.185 | -3.606 | -0.557 | 6.319 | 6.876 |
| 0.076 | 0.245 | -4.236 | 0.653  | 7.199 | 6.545 |
| 0.047 | 0.204 | -3.870 | -0.565 | 5.339 | 5.903 |
| 0.094 | 0.270 | -4.395 | 0.534  | 2.481 | 1.947 |
| 0.052 | 0.210 | -3.935 | 0.959  | 6.942 | 5.982 |
| 0.046 | 0.203 | -3.850 | -0.763 | 4.314 | 5.077 |
| 0.060 | 0.222 | -4.055 | 0.801  | 5.712 | 4.911 |
| 0.852 | 0.920 | -5.698 | -0.046 | 4.287 | 4.333 |
| 0.571 | 0.726 | -5.563 | 0.150  | 3.642 | 3.492 |
| 0.698 | 0.820 | -5.643 | 0.092  | 4.925 | 4.832 |
| 0.040 | 0.194 | -3.739 | 0.650  | 3.604 | 2.954 |
| 0.570 | 0.725 | -5.562 | -0.179 | 2.519 | 2.697 |
| 0.154 | 0.341 | -4.756 | 0.314  | 6.543 | 6.229 |
| 0.041 | 0.195 | -3.746 | 0.518  | 3.791 | 3.274 |
| 0.016 | 0.162 | -2.999 | 1.504  | 8.704 | 7.200 |
| 0.055 | 0.216 | -3.985 | 0.472  | 7.114 | 6.642 |
| 0.373 | 0.563 | -5.339 | 0.277  | 3.815 | 3.539 |
| 0.076 | 0.245 | -4.232 | 0.589  | 4.976 | 4.388 |
| 0.060 | 0.222 | -4.054 | 0.541  | 6.135 | 5.594 |
| 0.113 | 0.292 | -4.533 | 0.333  | 7.346 | 7.013 |
| 0.016 | 0.162 | -2.992 | -0.586 | 5.829 | 6.415 |
| 0.101 | 0.278 | -4.447 | -0.540 | 3.172 | 3.712 |
| 0.101 | 0.278 | -4.449 | 0.536  | 5.995 | 5.459 |
| 0.913 | 0.953 | -5.709 | 0.026  | 5.231 | 5.205 |
| 0.274 | 0.473 | -5.150 | 0.286  | 5.152 | 4.866 |
| 0.793 | 0.883 | -5.682 | 0.069  | 5.635 | 5.566 |
| 0.494 | 0.667 | -5.493 | 0.137  | 6.724 | 6.587 |
| 0.202 | 0.397 | -4.945 | 0.274  | 6.445 | 6.171 |

|       |       |        |        |       |       |
|-------|-------|--------|--------|-------|-------|
| 0.204 | 0.399 | -4.954 | 0.318  | 6.715 | 6.398 |
| 0.045 | 0.201 | -3.820 | -0.592 | 6.919 | 7.511 |
| 0.072 | 0.240 | -4.192 | 0.548  | 6.657 | 6.109 |
| 0.023 | 0.172 | -3.284 | 0.820  | 6.063 | 5.243 |
| 0.034 | 0.184 | -3.597 | 0.849  | 3.736 | 2.887 |
| 0.008 | 0.157 | -2.404 | 1.167  | 6.249 | 5.082 |
| 0.140 | 0.324 | -4.690 | 0.383  | 5.197 | 4.814 |
| 0.396 | 0.584 | -5.374 | 0.196  | 5.519 | 5.323 |
| 0.895 | 0.943 | -5.707 | 0.033  | 4.419 | 4.386 |
| 0.046 | 0.203 | -3.852 | -0.508 | 7.376 | 7.884 |
| 0.406 | 0.594 | -5.388 | 0.203  | 5.856 | 5.653 |
| 0.013 | 0.160 | -2.834 | 1.071  | 8.911 | 7.840 |
| 0.266 | 0.464 | -5.130 | 0.352  | 2.773 | 2.421 |
| 0.818 | 0.897 | -5.690 | 0.087  | 2.850 | 2.763 |
| 0.899 | 0.945 | -5.707 | -0.075 | 6.413 | 6.488 |
| 0.773 | 0.869 | -5.675 | 0.182  | 3.286 | 3.104 |
| 0.662 | 0.794 | -5.624 | -0.243 | 5.139 | 5.382 |
| 0.186 | 0.378 | -4.888 | -0.422 | 3.634 | 4.056 |
| 0.515 | 0.682 | -5.514 | -0.256 | 3.221 | 3.476 |
| 0.835 | 0.908 | -5.694 | -0.087 | 1.741 | 1.829 |
| 0.058 | 0.219 | -4.027 | -0.441 | 3.697 | 4.138 |
| 0.878 | 0.934 | -5.704 | -0.044 | 2.637 | 2.681 |
| 0.167 | 0.357 | -4.815 | -0.389 | 5.437 | 5.826 |
| 0.097 | 0.274 | -4.420 | 0.401  | 3.405 | 3.004 |
| 0.292 | 0.490 | -5.191 | 0.221  | 7.790 | 7.569 |
| 0.077 | 0.246 | -4.245 | -0.633 | 3.975 | 4.608 |
| 0.355 | 0.549 | -5.310 | -0.311 | 3.717 | 4.028 |
| 0.005 | 0.157 | -2.128 | 1.655  | 5.880 | 4.225 |
| 0.317 | 0.516 | -5.242 | 0.374  | 2.691 | 2.317 |
| 0.291 | 0.489 | -5.188 | 0.487  | 3.535 | 3.048 |
| 0.050 | 0.207 | -3.906 | 0.526  | 5.094 | 4.569 |
| 0.011 | 0.157 | -2.668 | -0.799 | 3.073 | 3.873 |
| 0.168 | 0.358 | -4.817 | -0.425 | 1.851 | 2.276 |
| 0.095 | 0.271 | -4.402 | 0.422  | 3.714 | 3.292 |
| 0.136 | 0.319 | -4.665 | 0.414  | 5.784 | 5.370 |
| 0.017 | 0.162 | -3.042 | -0.789 | 3.305 | 4.094 |
| 0.424 | 0.609 | -5.412 | 0.269  | 3.396 | 3.127 |
| 0.176 | 0.366 | -4.851 | -0.419 | 4.218 | 4.637 |
| 0.081 | 0.253 | -4.287 | 0.916  | 5.865 | 4.949 |
| 0.036 | 0.188 | -3.645 | 0.873  | 5.213 | 4.340 |
| 0.014 | 0.160 | -2.876 | 1.294  | 7.743 | 6.449 |
| 0.300 | 0.497 | -5.206 | -0.346 | 2.817 | 3.163 |
| 0.232 | 0.429 | -5.041 | 0.449  | 4.884 | 4.435 |
| 0.979 | 0.989 | -5.714 | -0.008 | 3.340 | 3.348 |
| 0.062 | 0.224 | -4.074 | 0.470  | 3.379 | 2.909 |
| 0.055 | 0.216 | -3.989 | 0.534  | 3.544 | 3.010 |
| 0.742 | 0.850 | -5.663 | -0.127 | 1.512 | 1.639 |
| 0.043 | 0.198 | -3.784 | 1.057  | 5.784 | 4.727 |
| 0.977 | 0.988 | -5.714 | -0.011 | 1.761 | 1.772 |
| 0.051 | 0.209 | -3.929 | -0.369 | 3.438 | 3.807 |



|       |       |        |        |       |       |
|-------|-------|--------|--------|-------|-------|
| 0.377 | 0.566 | -5.345 | -0.297 | 5.092 | 5.389 |
| 0.045 | 0.201 | -3.821 | -0.693 | 6.226 | 6.918 |
| 0.711 | 0.828 | -5.650 | -0.123 | 6.167 | 6.290 |
| 0.956 | 0.977 | -5.713 | 0.021  | 5.859 | 5.839 |
| 0.572 | 0.728 | -5.564 | -0.129 | 3.179 | 3.308 |
| 0.149 | 0.335 | -4.735 | 0.334  | 6.430 | 6.096 |
| 0.794 | 0.884 | -5.683 | 0.077  | 2.844 | 2.767 |
| 0.054 | 0.215 | -3.971 | 0.698  | 3.847 | 3.150 |
| 0.998 | 0.999 | -5.715 | 0.001  | 3.873 | 3.873 |
| 0.882 | 0.936 | -5.704 | 0.059  | 4.857 | 4.798 |
| 0.182 | 0.373 | -4.875 | 0.480  | 6.862 | 6.382 |
| 0.303 | 0.501 | -5.214 | 0.237  | 5.536 | 5.299 |
| 0.113 | 0.292 | -4.533 | -0.321 | 2.613 | 2.934 |
| 0.376 | 0.566 | -5.344 | 0.198  | 6.726 | 6.528 |
| 0.632 | 0.772 | -5.606 | 0.121  | 4.271 | 4.150 |
| 0.020 | 0.167 | -3.195 | 0.679  | 4.527 | 3.848 |
| 0.301 | 0.499 | -5.210 | -0.240 | 2.061 | 2.301 |
| 0.170 | 0.361 | -4.827 | 0.413  | 5.670 | 5.257 |
| 0.813 | 0.895 | -5.688 | -0.052 | 4.535 | 4.587 |
| 0.013 | 0.160 | -2.830 | 0.721  | 5.053 | 4.332 |
| 0.003 | 0.157 | -1.546 | 1.133  | 4.523 | 3.389 |
| 0.392 | 0.580 | -5.368 | -0.252 | 6.608 | 6.859 |
| 0.571 | 0.726 | -5.563 | -0.193 | 4.963 | 5.156 |
| 0.451 | 0.632 | -5.446 | -0.199 | 3.635 | 3.834 |
| 0.491 | 0.665 | -5.490 | -0.164 | 8.933 | 9.097 |
| 0.770 | 0.868 | -5.674 | -0.079 | 5.230 | 5.309 |
| 0.283 | 0.481 | -5.170 | -0.313 | 3.487 | 3.801 |
| 0.814 | 0.895 | -5.688 | 0.062  | 3.461 | 3.399 |
| 0.335 | 0.531 | -5.276 | -0.200 | 6.535 | 6.735 |
| 0.695 | 0.818 | -5.642 | 0.106  | 1.949 | 1.843 |
| 0.138 | 0.321 | -4.675 | 0.489  | 5.869 | 5.380 |
| 0.323 | 0.519 | -5.252 | -0.325 | 3.070 | 3.395 |
| 0.085 | 0.257 | -4.321 | 0.698  | 5.120 | 4.422 |
| 0.168 | 0.358 | -4.819 | 0.513  | 2.624 | 2.112 |
| 0.607 | 0.754 | -5.590 | -0.163 | 3.845 | 4.008 |
| 0.360 | 0.552 | -5.318 | -0.245 | 2.299 | 2.544 |
| 0.320 | 0.517 | -5.247 | -0.221 | 2.351 | 2.572 |
| 0.380 | 0.569 | -5.350 | 0.250  | 2.635 | 2.385 |
| 0.021 | 0.168 | -3.207 | 0.720  | 3.179 | 2.460 |
| 0.663 | 0.795 | -5.625 | -0.104 | 2.291 | 2.395 |
| 0.215 | 0.410 | -4.989 | 0.309  | 2.547 | 2.238 |
| 0.019 | 0.164 | -3.147 | -0.642 | 2.438 | 3.079 |
| 0.033 | 0.184 | -3.581 | -0.590 | 2.993 | 3.582 |
| 0.057 | 0.219 | -4.018 | 0.792  | 5.347 | 4.554 |
| 0.045 | 0.201 | -3.822 | 0.915  | 4.559 | 3.644 |
| 0.288 | 0.486 | -5.181 | -0.300 | 2.940 | 3.240 |
| 0.275 | 0.474 | -5.152 | 0.300  | 5.237 | 4.937 |
| 0.789 | 0.880 | -5.681 | -0.079 | 2.651 | 2.730 |
| 0.097 | 0.273 | -4.417 | 0.429  | 3.204 | 2.775 |
| 0.798 | 0.887 | -5.684 | 0.066  | 3.182 | 3.116 |

|       |       |        |        |       |       |
|-------|-------|--------|--------|-------|-------|
| 0.790 | 0.881 | -5.681 | -0.067 | 5.469 | 5.535 |
| 0.014 | 0.160 | -2.909 | -0.660 | 5.417 | 6.076 |
| 0.029 | 0.178 | -3.475 | -0.852 | 4.890 | 5.742 |
| 0.091 | 0.267 | -4.374 | 0.705  | 6.182 | 5.476 |
| 0.008 | 0.157 | -2.409 | 1.107  | 5.753 | 4.646 |
| 0.249 | 0.447 | -5.088 | 0.322  | 6.888 | 6.566 |
| 0.194 | 0.388 | -4.920 | 0.424  | 3.425 | 3.001 |
| 0.419 | 0.606 | -5.406 | -0.184 | 3.800 | 3.985 |
| 0.554 | 0.715 | -5.549 | -0.143 | 2.433 | 2.576 |
| 0.016 | 0.162 | -3.007 | 0.812  | 6.136 | 5.324 |
| 0.013 | 0.160 | -2.862 | -0.765 | 8.882 | 9.647 |
| 0.163 | 0.352 | -4.795 | -0.390 | 5.129 | 5.518 |
| 0.175 | 0.364 | -4.845 | 0.421  | 3.028 | 2.608 |
| 0.082 | 0.254 | -4.295 | -0.672 | 2.296 | 2.968 |
| 0.036 | 0.188 | -3.647 | -0.690 | 2.545 | 3.235 |
| 0.033 | 0.184 | -3.583 | 0.909  | 4.586 | 3.676 |
| 0.185 | 0.377 | -4.886 | 0.404  | 7.493 | 7.090 |
| 0.031 | 0.181 | -3.530 | -0.657 | 7.293 | 7.951 |
| 0.332 | 0.528 | -5.270 | -0.221 | 6.590 | 6.812 |
| 0.605 | 0.753 | -5.588 | -0.111 | 6.316 | 6.426 |
| 0.072 | 0.240 | -4.197 | 0.721  | 6.555 | 5.834 |
| 0.163 | 0.352 | -4.797 | 0.455  | 5.086 | 4.631 |
| 0.486 | 0.662 | -5.485 | 0.307  | 5.476 | 5.170 |
| 0.199 | 0.394 | -4.938 | 0.281  | 6.546 | 6.265 |
| 0.059 | 0.221 | -4.043 | -0.463 | 5.972 | 6.435 |
| 0.017 | 0.162 | -3.045 | 0.653  | 7.484 | 6.831 |
| 0.031 | 0.181 | -3.534 | -1.317 | 5.291 | 6.608 |
| 0.281 | 0.479 | -5.166 | -0.310 | 2.297 | 2.607 |
| 0.246 | 0.443 | -5.079 | -0.357 | 1.480 | 1.837 |
| 0.267 | 0.465 | -5.133 | 0.359  | 3.279 | 2.921 |
| 0.407 | 0.594 | -5.389 | 0.334  | 6.116 | 5.782 |
| 0.231 | 0.428 | -5.037 | 0.427  | 4.020 | 3.593 |
| 0.441 | 0.625 | -5.433 | 0.251  | 2.929 | 2.678 |
| 0.242 | 0.439 | -5.068 | 0.436  | 6.083 | 5.648 |
| 0.101 | 0.278 | -4.445 | -0.426 | 1.343 | 1.769 |
| 0.219 | 0.415 | -5.003 | 0.398  | 5.838 | 5.440 |
| 0.225 | 0.422 | -5.020 | -0.448 | 2.301 | 2.749 |
| 0.351 | 0.546 | -5.304 | 0.421  | 4.692 | 4.270 |
| 0.704 | 0.824 | -5.646 | 0.129  | 3.253 | 3.124 |
| 0.275 | 0.473 | -5.151 | 0.366  | 3.076 | 2.709 |
| 0.463 | 0.643 | -5.460 | 0.238  | 3.479 | 3.241 |
| 0.232 | 0.428 | -5.039 | 0.319  | 4.200 | 3.881 |
| 0.632 | 0.772 | -5.606 | 0.141  | 4.388 | 4.247 |
| 0.174 | 0.363 | -4.841 | 0.401  | 5.120 | 4.719 |
| 0.022 | 0.171 | -3.267 | 1.982  | 6.754 | 4.772 |
| 0.329 | 0.524 | -5.263 | -0.331 | 2.912 | 3.243 |
| 0.026 | 0.176 | -3.389 | -0.644 | 6.315 | 6.958 |
| 0.047 | 0.203 | -3.855 | -0.586 | 5.251 | 5.838 |
| 0.321 | 0.518 | -5.250 | -0.304 | 2.985 | 3.289 |
| 0.239 | 0.436 | -5.059 | 0.362  | 4.093 | 3.731 |

|       |       |        |        |        |        |
|-------|-------|--------|--------|--------|--------|
| 0.340 | 0.535 | -5.284 | 0.257  | 3.402  | 3.145  |
| 0.485 | 0.661 | -5.484 | 0.399  | 4.650  | 4.251  |
| 0.227 | 0.424 | -5.025 | 0.614  | 2.431  | 1.816  |
| 0.040 | 0.194 | -3.730 | 0.855  | 4.877  | 4.023  |
| 0.200 | 0.396 | -4.941 | 0.360  | 4.716  | 4.356  |
| 0.330 | 0.526 | -5.266 | -0.313 | 3.738  | 4.051  |
| 0.974 | 0.987 | -5.714 | 0.010  | 3.370  | 3.360  |
| 0.025 | 0.175 | -3.368 | 1.443  | 5.225  | 3.781  |
| 0.864 | 0.927 | -5.701 | 0.048  | 3.408  | 3.360  |
| 0.156 | 0.344 | -4.766 | -0.430 | 2.871  | 3.302  |
| 0.015 | 0.160 | -2.957 | -1.011 | 4.107  | 5.118  |
| 0.983 | 0.991 | -5.715 | 0.006  | 2.743  | 2.737  |
| 0.847 | 0.915 | -5.697 | -0.071 | 2.665  | 2.736  |
| 0.658 | 0.793 | -5.622 | -0.123 | 2.678  | 2.802  |
| 0.061 | 0.223 | -4.061 | 0.820  | 6.416  | 5.596  |
| 0.047 | 0.204 | -3.866 | -0.891 | 2.501  | 3.392  |
| 0.172 | 0.362 | -4.835 | -0.408 | 3.846  | 4.254  |
| 0.010 | 0.157 | -2.615 | 2.199  | 8.051  | 5.852  |
| 0.029 | 0.178 | -3.484 | 1.001  | 8.288  | 7.286  |
| 0.033 | 0.184 | -3.592 | 0.428  | 4.491  | 4.063  |
| 0.129 | 0.310 | -4.630 | 0.435  | 7.593  | 7.158  |
| 0.879 | 0.934 | -5.704 | -0.041 | 4.074  | 4.115  |
| 0.052 | 0.212 | -3.946 | 0.586  | 2.787  | 2.201  |
| 0.022 | 0.171 | -3.266 | -0.710 | 7.200  | 7.909  |
| 0.094 | 0.270 | -4.392 | 0.859  | 6.508  | 5.649  |
| 0.296 | 0.493 | -5.199 | 0.324  | 6.079  | 5.755  |
| 0.039 | 0.192 | -3.707 | 0.442  | 5.044  | 4.602  |
| 0.838 | 0.910 | -5.695 | 0.056  | 4.177  | 4.121  |
| 0.018 | 0.162 | -3.082 | 1.093  | 5.369  | 4.277  |
| 0.613 | 0.758 | -5.594 | -0.144 | 6.059  | 6.203  |
| 0.081 | 0.252 | -4.282 | -0.370 | 10.419 | 10.789 |
| 0.504 | 0.673 | -5.503 | 0.200  | 5.268  | 5.068  |
| 0.097 | 0.273 | -4.418 | -0.444 | 4.530  | 4.973  |
| 0.995 | 0.998 | -5.715 | -0.001 | 2.289  | 2.290  |
| 0.146 | 0.330 | -4.718 | 0.373  | 2.958  | 2.584  |
| 0.164 | 0.353 | -4.800 | -0.345 | 5.430  | 5.775  |
| 0.030 | 0.179 | -3.502 | -0.589 | 3.261  | 3.850  |
| 0.258 | 0.455 | -5.109 | -0.243 | 6.311  | 6.553  |
| 0.187 | 0.380 | -4.894 | -0.410 | 3.080  | 3.490  |
| 0.283 | 0.481 | -5.170 | -0.295 | 4.051  | 4.346  |
| 0.108 | 0.287 | -4.500 | 0.622  | 6.439  | 5.817  |
| 0.263 | 0.461 | -5.122 | -0.460 | 4.399  | 4.860  |
| 0.019 | 0.164 | -3.126 | -0.551 | 5.156  | 5.706  |
| 0.689 | 0.814 | -5.639 | 0.110  | 2.559  | 2.450  |
| 0.005 | 0.157 | -2.068 | 0.987  | 8.040  | 7.053  |
| 0.107 | 0.286 | -4.491 | 0.489  | 5.256  | 4.768  |
| 0.036 | 0.189 | -3.657 | -0.551 | 3.224  | 3.775  |
| 0.460 | 0.641 | -5.456 | -0.282 | 3.241  | 3.523  |
| 0.447 | 0.629 | -5.442 | -0.307 | 3.807  | 4.113  |
| 0.693 | 0.816 | -5.641 | 0.098  | 5.376  | 5.278  |

|       |       |        |        |       |       |
|-------|-------|--------|--------|-------|-------|
| 0.066 | 0.230 | -4.124 | 0.393  | 7.332 | 6.938 |
| 0.304 | 0.502 | -5.216 | -0.243 | 7.526 | 7.769 |
| 0.202 | 0.397 | -4.945 | -0.236 | 5.703 | 5.939 |
| 0.040 | 0.194 | -3.737 | -0.647 | 5.457 | 6.105 |
| 0.064 | 0.228 | -4.106 | -0.566 | 4.335 | 4.902 |
| 0.651 | 0.787 | -5.618 | -0.130 | 3.041 | 3.171 |
| 0.209 | 0.404 | -4.970 | 0.329  | 6.727 | 6.398 |
| 0.187 | 0.379 | -4.894 | 0.337  | 8.636 | 8.299 |
| 0.190 | 0.383 | -4.905 | 0.345  | 9.145 | 8.801 |
| 0.202 | 0.397 | -4.945 | 0.326  | 8.687 | 8.361 |
| 0.211 | 0.406 | -4.976 | 0.321  | 8.517 | 8.196 |
| 0.224 | 0.421 | -5.017 | 0.307  | 8.665 | 8.358 |
| 0.230 | 0.427 | -5.034 | 0.312  | 8.088 | 7.777 |
| 0.028 | 0.178 | -3.459 | 1.690  | 9.609 | 7.919 |
| 0.003 | 0.157 | -1.747 | -0.736 | 5.104 | 5.840 |
| 0.014 | 0.160 | -2.881 | 2.073  | 8.543 | 6.470 |
| 0.009 | 0.157 | -2.494 | 1.121  | 6.291 | 5.170 |
| 0.028 | 0.178 | -3.459 | 1.163  | 7.907 | 6.744 |
| 0.013 | 0.160 | -2.848 | 1.908  | 8.103 | 6.195 |
| 0.004 | 0.157 | -1.834 | 1.982  | 7.112 | 5.130 |
| 0.073 | 0.241 | -4.203 | 0.578  | 7.104 | 6.526 |
| 0.004 | 0.157 | -1.829 | 2.429  | 8.365 | 5.935 |
| 0.036 | 0.188 | -3.643 | 0.700  | 5.237 | 4.538 |
| 0.003 | 0.157 | -1.504 | 2.170  | 6.891 | 4.721 |
| 0.141 | 0.326 | -4.695 | 0.477  | 3.230 | 2.754 |
| 0.770 | 0.868 | -5.674 | 0.088  | 7.569 | 7.481 |
| 0.069 | 0.236 | -4.165 | 1.515  | 9.047 | 7.532 |
| 0.001 | 0.157 | -0.623 | 1.278  | 4.196 | 2.918 |
| 0.669 | 0.801 | -5.628 | 0.255  | 3.982 | 3.727 |
| 0.016 | 0.162 | -3.027 | 1.189  | 5.918 | 4.729 |
| 0.052 | 0.211 | -3.937 | 1.331  | 7.364 | 6.033 |
| 0.160 | 0.349 | -4.785 | 0.834  | 8.015 | 7.181 |
| 0.010 | 0.157 | -2.604 | 1.083  | 8.224 | 7.141 |
| 0.399 | 0.587 | -5.378 | -0.486 | 3.929 | 4.414 |
| 0.330 | 0.525 | -5.265 | -0.341 | 2.416 | 2.756 |
| 0.081 | 0.252 | -4.278 | -0.588 | 2.582 | 3.170 |
| 0.163 | 0.352 | -4.798 | 0.329  | 4.160 | 3.831 |
| 0.442 | 0.625 | -5.435 | -0.218 | 2.200 | 2.418 |
| 0.441 | 0.625 | -5.434 | 0.213  | 3.505 | 3.292 |
| 0.046 | 0.203 | -3.845 | 0.522  | 6.422 | 5.900 |
| 0.110 | 0.289 | -4.511 | 0.450  | 2.657 | 2.207 |
| 0.065 | 0.229 | -4.118 | -0.862 | 5.904 | 6.765 |
| 0.048 | 0.205 | -3.879 | 0.690  | 5.573 | 4.883 |
| 0.237 | 0.434 | -5.054 | 0.342  | 5.252 | 4.910 |
| 0.708 | 0.826 | -5.648 | -0.100 | 3.158 | 3.258 |
| 0.214 | 0.409 | -4.987 | -0.456 | 4.164 | 4.621 |
| 0.020 | 0.167 | -3.195 | -0.645 | 4.727 | 5.372 |
| 0.036 | 0.189 | -3.656 | 1.013  | 6.505 | 5.492 |
| 0.019 | 0.164 | -3.145 | 0.985  | 3.578 | 2.593 |
| 0.115 | 0.295 | -4.545 | -0.422 | 2.086 | 2.509 |

|       |       |        |        |        |        |
|-------|-------|--------|--------|--------|--------|
| 0.046 | 0.203 | -3.842 | -0.563 | 4.883  | 5.446  |
| 0.100 | 0.277 | -4.438 | -0.658 | 2.746  | 3.404  |
| 0.031 | 0.180 | -3.522 | 1.070  | 8.455  | 7.386  |
| 0.095 | 0.271 | -4.401 | -0.764 | 2.219  | 2.984  |
| 0.397 | 0.585 | -5.376 | -0.307 | 4.474  | 4.781  |
| 0.702 | 0.823 | -5.646 | 0.073  | 5.833  | 5.760  |
| 0.038 | 0.192 | -3.705 | 0.595  | 6.929  | 6.334  |
| 0.143 | 0.327 | -4.703 | 0.538  | 3.117  | 2.579  |
| 0.716 | 0.831 | -5.652 | -0.090 | 4.281  | 4.371  |
| 0.470 | 0.649 | -5.467 | 0.231  | 2.992  | 2.761  |
| 0.552 | 0.713 | -5.548 | -0.155 | 1.987  | 2.141  |
| 0.213 | 0.408 | -4.981 | 0.426  | 4.136  | 3.710  |
| 0.074 | 0.242 | -4.215 | 0.436  | 8.386  | 7.950  |
| 0.478 | 0.655 | -5.476 | 0.151  | 6.568  | 6.416  |
| 0.608 | 0.755 | -5.590 | -0.141 | 5.050  | 5.191  |
| 0.316 | 0.513 | -5.238 | 0.382  | 3.371  | 2.989  |
| 0.534 | 0.697 | -5.531 | 0.308  | 4.772  | 4.464  |
| 0.780 | 0.874 | -5.678 | 0.161  | 3.493  | 3.332  |
| 0.013 | 0.160 | -2.858 | -0.926 | 3.518  | 4.444  |
| 0.897 | 0.943 | -5.707 | -0.063 | 3.811  | 3.874  |
| 0.632 | 0.772 | -5.606 | -0.120 | 2.455  | 2.575  |
| 0.776 | 0.872 | -5.677 | -0.089 | 5.708  | 5.797  |
| 0.028 | 0.178 | -3.450 | 0.457  | 8.038  | 7.581  |
| 0.056 | 0.217 | -3.994 | 0.517  | 5.454  | 4.938  |
| 0.026 | 0.176 | -3.405 | 0.585  | 3.704  | 3.119  |
| 0.000 | 0.157 | 0.549  | 1.988  | 5.158  | 3.170  |
| 0.545 | 0.707 | -5.542 | 0.132  | 3.487  | 3.354  |
| 0.050 | 0.208 | -3.918 | 0.527  | 7.164  | 6.636  |
| 0.004 | 0.157 | -1.922 | 2.849  | 8.491  | 5.643  |
| 0.065 | 0.229 | -4.115 | 0.506  | 7.405  | 6.899  |
| 0.048 | 0.204 | -3.873 | 0.853  | 4.872  | 4.019  |
| 0.435 | 0.619 | -5.426 | 0.190  | 6.627  | 6.437  |
| 0.028 | 0.178 | -3.448 | -0.492 | 6.343  | 6.835  |
| 0.919 | 0.957 | -5.710 | -0.024 | 4.515  | 4.539  |
| 0.182 | 0.373 | -4.873 | -0.358 | 5.682  | 6.040  |
| 0.925 | 0.959 | -5.711 | 0.033  | 2.502  | 2.470  |
| 0.302 | 0.500 | -5.212 | 0.348  | 2.663  | 2.314  |
| 0.203 | 0.398 | -4.951 | 0.345  | 6.722  | 6.377  |
| 0.281 | 0.478 | -5.164 | -0.260 | 4.638  | 4.899  |
| 0.190 | 0.382 | -4.903 | -0.389 | 1.864  | 2.253  |
| 0.118 | 0.298 | -4.563 | 0.495  | 3.782  | 3.287  |
| 0.162 | 0.351 | -4.792 | -0.385 | 3.695  | 4.080  |
| 0.974 | 0.987 | -5.714 | -0.008 | 4.629  | 4.638  |
| 0.016 | 0.162 | -3.014 | 0.649  | 2.912  | 2.263  |
| 0.270 | 0.468 | -5.141 | 0.315  | 3.730  | 3.415  |
| 0.425 | 0.610 | -5.413 | -0.283 | 10.010 | 10.294 |
| 0.416 | 0.603 | -5.402 | 0.170  | 5.979  | 5.809  |
| 0.126 | 0.306 | -4.610 | 0.615  | 5.024  | 4.410  |
| 0.029 | 0.178 | -3.493 | 0.710  | 3.362  | 2.652  |
| 0.057 | 0.218 | -4.008 | 0.660  | 4.803  | 4.143  |

|       |       |        |        |       |       |
|-------|-------|--------|--------|-------|-------|
| 0.807 | 0.891 | -5.686 | 0.084  | 4.789 | 4.705 |
| 0.866 | 0.928 | -5.701 | 0.050  | 5.278 | 5.228 |
| 0.008 | 0.157 | -2.418 | 1.472  | 5.437 | 3.965 |
| 0.315 | 0.513 | -5.237 | 0.214  | 6.000 | 5.786 |
| 0.006 | 0.157 | -2.170 | 0.780  | 5.385 | 4.605 |
| 0.024 | 0.173 | -3.328 | 0.494  | 3.866 | 3.372 |
| 0.439 | 0.622 | -5.431 | -0.236 | 2.324 | 2.560 |
| 0.363 | 0.555 | -5.324 | 0.376  | 3.896 | 3.519 |
| 0.199 | 0.393 | -4.935 | 0.397  | 2.983 | 2.587 |
| 0.066 | 0.230 | -4.125 | 0.430  | 9.210 | 8.780 |
| 0.371 | 0.562 | -5.337 | 0.238  | 2.667 | 2.430 |
| 0.016 | 0.162 | -2.999 | -0.589 | 2.819 | 3.407 |
| 0.337 | 0.533 | -5.279 | -0.277 | 4.425 | 4.702 |
| 0.676 | 0.805 | -5.632 | -0.118 | 3.429 | 3.547 |
| 0.964 | 0.982 | -5.714 | 0.015  | 4.501 | 4.486 |
| 0.804 | 0.890 | -5.686 | -0.082 | 3.635 | 3.717 |
| 0.207 | 0.402 | -4.963 | -0.329 | 3.824 | 4.153 |
| 0.901 | 0.946 | -5.707 | -0.044 | 2.951 | 2.995 |
| 0.190 | 0.383 | -4.905 | 0.329  | 7.357 | 7.027 |
| 0.269 | 0.467 | -5.137 | -0.380 | 8.498 | 8.878 |
| 0.927 | 0.961 | -5.711 | 0.028  | 2.639 | 2.611 |
| 0.010 | 0.157 | -2.635 | -1.288 | 2.474 | 3.762 |
| 0.292 | 0.490 | -5.190 | 0.520  | 3.712 | 3.192 |
| 0.133 | 0.316 | -4.650 | 0.929  | 5.425 | 4.496 |
| 0.179 | 0.370 | -4.864 | 0.434  | 3.992 | 3.558 |
| 0.001 | 0.157 | -0.660 | -1.305 | 3.668 | 4.973 |
| 0.686 | 0.812 | -5.637 | -0.182 | 2.129 | 2.311 |
| 0.483 | 0.659 | -5.482 | 0.219  | 4.020 | 3.802 |
| 0.320 | 0.518 | -5.248 | -0.285 | 5.035 | 5.320 |
| 0.475 | 0.653 | -5.473 | 0.225  | 3.667 | 3.442 |
| 0.913 | 0.954 | -5.709 | -0.034 | 4.883 | 4.918 |
| 0.583 | 0.736 | -5.572 | 0.156  | 3.303 | 3.148 |
| 0.007 | 0.157 | -2.317 | 0.882  | 3.613 | 2.730 |
| 0.150 | 0.336 | -4.738 | 0.307  | 3.460 | 3.153 |
| 0.014 | 0.160 | -2.897 | 0.830  | 5.618 | 4.788 |
| 0.035 | 0.186 | -3.625 | -0.938 | 6.048 | 6.986 |
| 0.744 | 0.851 | -5.664 | 0.089  | 3.296 | 3.207 |
| 0.275 | 0.473 | -5.151 | 0.241  | 4.399 | 4.158 |
| 0.130 | 0.311 | -4.634 | -0.411 | 4.762 | 5.172 |
| 0.925 | 0.959 | -5.711 | -0.027 | 3.512 | 3.539 |
| 0.253 | 0.451 | -5.098 | 0.385  | 7.311 | 6.926 |
| 0.084 | 0.256 | -4.310 | -0.665 | 4.373 | 5.038 |
| 0.384 | 0.573 | -5.357 | -0.309 | 5.042 | 5.351 |
| 0.081 | 0.252 | -4.282 | -0.533 | 3.979 | 4.512 |
| 0.010 | 0.157 | -2.646 | 0.719  | 4.747 | 4.028 |
| 0.148 | 0.332 | -4.727 | -0.390 | 2.222 | 2.611 |
| 0.012 | 0.159 | -2.739 | 1.323  | 4.437 | 3.114 |
| 0.135 | 0.319 | -4.662 | -1.427 | 2.873 | 4.299 |
| 0.318 | 0.516 | -5.244 | 0.520  | 4.858 | 4.338 |
| 0.037 | 0.190 | -3.671 | 1.622  | 7.002 | 5.380 |

|       |       |        |        |        |        |
|-------|-------|--------|--------|--------|--------|
| 0.029 | 0.178 | -3.482 | 1.185  | 6.461  | 5.276  |
| 0.538 | 0.700 | -5.535 | 0.237  | 4.714  | 4.477  |
| 0.076 | 0.245 | -4.233 | 0.412  | 5.143  | 4.731  |
| 0.010 | 0.157 | -2.597 | 0.879  | 7.872  | 6.993  |
| 0.097 | 0.273 | -4.415 | 0.846  | 6.218  | 5.372  |
| 0.023 | 0.173 | -3.291 | 0.925  | 6.310  | 5.385  |
| 0.003 | 0.157 | -1.603 | -1.243 | 7.018  | 8.261  |
| 0.044 | 0.201 | -3.815 | -0.404 | 6.365  | 6.769  |
| 0.207 | 0.402 | -4.964 | -0.371 | 5.453  | 5.823  |
| 0.103 | 0.280 | -4.461 | 0.445  | 3.237  | 2.793  |
| 0.164 | 0.353 | -4.800 | -0.455 | 7.659  | 8.115  |
| 0.711 | 0.828 | -5.650 | 0.167  | 3.172  | 3.005  |
| 0.083 | 0.254 | -4.297 | -0.400 | 5.593  | 5.993  |
| 0.521 | 0.687 | -5.520 | -0.283 | 5.738  | 6.020  |
| 0.466 | 0.645 | -5.463 | -0.229 | 3.735  | 3.964  |
| 0.024 | 0.173 | -3.336 | -0.907 | 3.710  | 4.617  |
| 0.116 | 0.296 | -4.552 | 0.319  | 7.339  | 7.020  |
| 0.447 | 0.629 | -5.441 | -0.166 | 4.714  | 4.880  |
| 0.157 | 0.345 | -4.768 | -0.356 | 5.737  | 6.093  |
| 0.800 | 0.888 | -5.684 | 0.086  | 5.273  | 5.188  |
| 0.333 | 0.528 | -5.271 | 0.363  | 3.813  | 3.450  |
| 0.410 | 0.597 | -5.393 | -0.191 | 4.259  | 4.450  |
| 0.030 | 0.179 | -3.507 | 0.547  | 3.742  | 3.195  |
| 0.110 | 0.289 | -4.511 | 0.687  | 5.047  | 4.361  |
| 0.420 | 0.607 | -5.407 | 0.164  | 10.279 | 10.115 |
| 0.497 | 0.669 | -5.496 | 0.190  | 3.563  | 3.374  |
| 0.568 | 0.724 | -5.560 | 0.138  | 4.815  | 4.677  |
| 0.037 | 0.190 | -3.675 | 0.987  | 5.804  | 4.817  |
| 0.069 | 0.235 | -4.156 | 0.504  | 4.092  | 3.589  |
| 0.086 | 0.258 | -4.323 | -0.467 | 4.485  | 4.952  |
| 0.077 | 0.247 | -4.247 | 0.714  | 4.695  | 3.981  |
| 0.462 | 0.643 | -5.459 | 0.196  | 3.084  | 2.889  |
| 0.089 | 0.263 | -4.351 | 0.928  | 9.567  | 8.639  |
| 0.605 | 0.753 | -5.588 | 0.155  | 4.595  | 4.440  |
| 0.381 | 0.570 | -5.351 | -0.244 | 3.186  | 3.430  |
| 0.802 | 0.889 | -5.685 | 0.075  | 5.447  | 5.372  |
| 0.269 | 0.467 | -5.137 | 0.261  | 6.359  | 6.098  |
| 0.976 | 0.988 | -5.714 | 0.009  | 2.444  | 2.435  |
| 0.007 | 0.157 | -2.361 | 0.753  | 6.167  | 5.415  |
| 0.165 | 0.354 | -4.805 | 0.311  | 5.042  | 4.731  |
| 0.089 | 0.264 | -4.355 | 0.375  | 6.088  | 5.713  |
| 0.504 | 0.674 | -5.504 | 0.164  | 3.509  | 3.346  |
| 0.105 | 0.284 | -4.480 | 0.560  | 2.982  | 2.423  |
| 0.746 | 0.853 | -5.665 | -0.095 | 3.114  | 3.209  |
| 0.982 | 0.990 | -5.715 | -0.007 | 1.928  | 1.934  |
| 0.085 | 0.257 | -4.319 | 0.791  | 4.039  | 3.248  |
| 0.983 | 0.991 | -5.715 | 0.005  | 5.481  | 5.476  |
| 0.995 | 0.998 | -5.715 | 0.002  | 5.246  | 5.245  |
| 0.036 | 0.188 | -3.651 | 0.724  | 4.951  | 4.227  |
| 0.095 | 0.271 | -4.406 | 0.620  | 3.095  | 2.475  |

|       |       |        |        |       |       |
|-------|-------|--------|--------|-------|-------|
| 0.603 | 0.752 | -5.587 | 0.120  | 7.181 | 7.061 |
| 0.679 | 0.808 | -5.634 | 0.097  | 7.218 | 7.120 |
| 0.249 | 0.446 | -5.086 | -0.318 | 3.297 | 3.616 |
| 0.140 | 0.324 | -4.686 | -0.471 | 2.615 | 3.086 |
| 0.312 | 0.509 | -5.232 | -0.358 | 2.680 | 3.039 |
| 0.223 | 0.419 | -5.012 | -0.296 | 5.040 | 5.336 |
| 0.077 | 0.246 | -4.243 | -0.487 | 5.786 | 6.273 |
| 0.029 | 0.178 | -3.476 | -0.552 | 5.273 | 5.825 |
| 0.044 | 0.201 | -3.811 | -0.520 | 5.487 | 6.007 |
| 0.822 | 0.899 | -5.691 | 0.081  | 3.559 | 3.478 |
| 0.733 | 0.844 | -5.660 | -0.072 | 7.795 | 7.867 |
| 0.270 | 0.469 | -5.141 | 0.257  | 6.642 | 6.385 |
| 0.056 | 0.217 | -3.998 | 0.420  | 7.921 | 7.501 |
| 0.865 | 0.928 | -5.701 | 0.044  | 3.847 | 3.804 |
| 0.086 | 0.258 | -4.328 | 0.567  | 9.371 | 8.804 |
| 0.029 | 0.178 | -3.468 | 0.439  | 8.423 | 7.984 |
| 0.404 | 0.592 | -5.385 | -0.202 | 5.301 | 5.503 |
| 0.896 | 0.943 | -5.707 | -0.028 | 6.349 | 6.377 |
| 0.013 | 0.160 | -2.824 | 0.534  | 5.830 | 5.296 |
| 0.809 | 0.893 | -5.687 | 0.054  | 5.667 | 5.613 |
| 0.340 | 0.535 | -5.283 | 0.254  | 4.080 | 3.826 |
| 0.975 | 0.987 | -5.714 | 0.007  | 2.095 | 2.088 |
| 0.555 | 0.715 | -5.550 | 0.196  | 2.414 | 2.219 |
| 0.452 | 0.633 | -5.447 | -0.164 | 4.979 | 5.143 |
| 0.636 | 0.775 | -5.609 | 0.124  | 5.840 | 5.716 |
| 0.379 | 0.569 | -5.349 | -0.252 | 5.368 | 5.620 |
| 0.699 | 0.821 | -5.644 | 0.103  | 6.809 | 6.706 |
| 0.279 | 0.477 | -5.160 | -0.461 | 3.191 | 3.652 |
| 0.175 | 0.365 | -4.849 | 0.346  | 7.414 | 7.068 |
| 0.054 | 0.215 | -3.976 | 0.545  | 9.167 | 8.622 |
| 0.057 | 0.219 | -4.016 | -1.048 | 4.344 | 5.392 |
| 0.293 | 0.490 | -5.191 | 0.338  | 5.072 | 4.735 |
| 0.558 | 0.717 | -5.552 | -0.261 | 4.264 | 4.526 |
| 0.517 | 0.684 | -5.516 | -0.177 | 2.810 | 2.987 |
| 0.399 | 0.587 | -5.379 | -0.183 | 3.586 | 3.768 |
| 0.042 | 0.197 | -3.778 | 0.421  | 6.321 | 5.900 |
| 0.066 | 0.231 | -4.130 | 0.817  | 5.584 | 4.767 |
| 0.384 | 0.572 | -5.356 | 0.220  | 3.544 | 3.324 |
| 0.168 | 0.358 | -4.818 | -0.365 | 5.930 | 6.295 |
| 0.862 | 0.926 | -5.701 | 0.052  | 2.985 | 2.933 |
| 0.385 | 0.574 | -5.358 | -0.246 | 2.125 | 2.371 |
| 0.979 | 0.989 | -5.714 | 0.007  | 2.732 | 2.726 |
| 0.441 | 0.625 | -5.434 | 0.183  | 6.146 | 5.964 |
| 0.218 | 0.413 | -4.999 | -0.279 | 2.085 | 2.363 |
| 0.370 | 0.560 | -5.335 | 0.291  | 2.687 | 2.396 |
| 0.808 | 0.892 | -5.687 | 0.088  | 2.678 | 2.590 |
| 0.000 | 0.157 | 0.505  | 1.215  | 3.699 | 2.484 |
| 0.376 | 0.566 | -5.344 | 0.330  | 4.019 | 3.689 |
| 0.045 | 0.201 | -3.822 | 0.653  | 7.199 | 6.546 |
| 0.103 | 0.280 | -4.460 | 0.674  | 8.492 | 7.818 |



|       |       |        |        |       |       |
|-------|-------|--------|--------|-------|-------|
| 0.029 | 0.178 | -3.480 | 0.922  | 6.784 | 5.862 |
| 0.038 | 0.192 | -3.698 | -0.823 | 2.683 | 3.506 |
| 0.079 | 0.249 | -4.266 | 0.524  | 3.499 | 2.975 |
| 0.006 | 0.157 | -2.170 | 0.675  | 3.968 | 3.293 |
| 0.388 | 0.576 | -5.363 | 0.219  | 6.234 | 6.015 |
| 0.643 | 0.780 | -5.613 | 0.243  | 5.081 | 4.838 |
| 0.821 | 0.899 | -5.691 | -0.070 | 3.027 | 3.097 |
| 0.056 | 0.217 | -3.993 | 0.800  | 6.642 | 5.842 |
| 0.004 | 0.157 | -1.812 | 2.278  | 6.758 | 4.480 |
| 0.208 | 0.403 | -4.967 | 0.690  | 5.502 | 4.812 |
| 0.171 | 0.361 | -4.832 | 0.433  | 4.116 | 3.683 |
| 0.008 | 0.157 | -2.430 | -1.165 | 4.511 | 5.676 |
| 0.006 | 0.157 | -2.139 | -1.288 | 7.585 | 8.873 |
| 0.240 | 0.438 | -5.063 | -0.372 | 6.529 | 6.900 |
| 0.136 | 0.320 | -4.669 | 0.519  | 4.767 | 4.248 |
| 0.031 | 0.181 | -3.531 | 0.609  | 3.237 | 2.627 |
| 0.932 | 0.963 | -5.711 | -0.023 | 4.031 | 4.054 |
| 0.461 | 0.641 | -5.457 | 0.168  | 7.743 | 7.575 |
| 0.527 | 0.692 | -5.525 | 0.185  | 3.849 | 3.663 |
| 0.017 | 0.162 | -3.048 | 0.806  | 4.062 | 3.255 |
| 0.046 | 0.203 | -3.848 | -0.747 | 2.740 | 3.488 |
| 0.005 | 0.157 | -1.988 | 1.509  | 5.345 | 3.836 |
| 0.280 | 0.478 | -5.164 | -0.405 | 3.589 | 3.994 |
| 0.123 | 0.304 | -4.593 | 0.894  | 5.462 | 4.568 |
| 0.126 | 0.307 | -4.612 | 0.605  | 4.921 | 4.317 |
| 0.191 | 0.383 | -4.906 | -0.416 | 4.045 | 4.461 |
| 0.109 | 0.288 | -4.506 | 0.851  | 6.424 | 5.573 |
| 0.132 | 0.315 | -4.646 | 0.417  | 6.717 | 6.300 |
| 0.359 | 0.552 | -5.317 | 0.273  | 5.307 | 5.034 |
| 0.699 | 0.820 | -5.644 | 0.139  | 2.165 | 2.026 |
| 0.034 | 0.185 | -3.612 | -0.559 | 9.344 | 9.903 |
| 0.289 | 0.488 | -5.184 | 0.423  | 5.204 | 4.780 |
| 0.044 | 0.200 | -3.804 | -0.518 | 6.205 | 6.723 |
| 0.662 | 0.795 | -5.624 | -0.120 | 2.719 | 2.839 |
| 0.202 | 0.397 | -4.947 | -0.291 | 5.498 | 5.789 |
| 0.164 | 0.353 | -4.801 | -0.325 | 4.342 | 4.667 |
| 0.088 | 0.262 | -4.346 | 0.732  | 4.059 | 3.328 |
| 0.856 | 0.922 | -5.699 | 0.061  | 1.939 | 1.877 |
| 0.089 | 0.264 | -4.354 | 0.605  | 7.327 | 6.722 |
| 0.148 | 0.332 | -4.726 | -0.435 | 5.073 | 5.509 |
| 0.103 | 0.281 | -4.466 | -0.696 | 2.083 | 2.779 |
| 0.032 | 0.183 | -3.566 | 0.587  | 4.247 | 3.660 |
| 0.071 | 0.238 | -4.182 | 0.732  | 4.492 | 3.760 |
| 0.066 | 0.230 | -4.122 | -0.617 | 3.459 | 4.076 |
| 0.011 | 0.157 | -2.692 | -0.995 | 5.565 | 6.560 |
| 0.086 | 0.259 | -4.332 | 0.657  | 4.772 | 4.115 |
| 0.105 | 0.283 | -4.477 | 0.518  | 2.724 | 2.206 |
| 0.746 | 0.852 | -5.665 | -0.173 | 1.979 | 2.152 |
| 0.038 | 0.192 | -3.697 | 1.018  | 6.623 | 5.606 |
| 0.015 | 0.160 | -2.932 | 0.821  | 8.284 | 7.463 |

|       |       |        |        |       |       |
|-------|-------|--------|--------|-------|-------|
| 0.019 | 0.164 | -3.132 | 0.717  | 7.756 | 7.039 |
| 0.444 | 0.627 | -5.438 | 0.174  | 7.626 | 7.452 |
| 0.596 | 0.747 | -5.582 | -0.130 | 4.724 | 4.854 |
| 0.082 | 0.253 | -4.289 | 0.743  | 6.076 | 5.333 |
| 0.065 | 0.229 | -4.111 | 0.721  | 7.126 | 6.405 |
| 0.289 | 0.487 | -5.182 | 0.261  | 5.809 | 5.548 |
| 0.033 | 0.184 | -3.591 | 0.587  | 6.581 | 5.994 |
| 0.069 | 0.235 | -4.155 | 1.555  | 8.823 | 7.268 |
| 0.009 | 0.157 | -2.494 | 1.678  | 7.894 | 6.216 |
| 0.020 | 0.167 | -3.177 | 1.709  | 8.529 | 6.821 |
| 0.020 | 0.167 | -3.172 | 0.739  | 5.609 | 4.870 |
| 0.113 | 0.292 | -4.533 | 0.453  | 5.132 | 4.678 |
| 0.658 | 0.792 | -5.622 | 0.124  | 3.576 | 3.452 |
| 0.313 | 0.510 | -5.233 | 0.201  | 6.840 | 6.639 |
| 0.040 | 0.194 | -3.742 | 0.918  | 6.068 | 5.149 |
| 0.193 | 0.387 | -4.916 | 0.583  | 3.526 | 2.943 |
| 0.343 | 0.538 | -5.290 | -0.244 | 8.207 | 8.451 |
| 0.016 | 0.162 | -3.005 | 1.380  | 8.322 | 6.942 |
| 0.071 | 0.238 | -4.180 | 0.646  | 4.227 | 3.581 |
| 0.011 | 0.157 | -2.676 | 0.634  | 3.221 | 2.587 |
| 0.294 | 0.491 | -5.194 | -0.295 | 6.343 | 6.638 |
| 0.049 | 0.206 | -3.888 | 0.611  | 6.155 | 5.544 |
| 0.241 | 0.438 | -5.065 | 0.486  | 4.459 | 3.973 |
| 0.367 | 0.558 | -5.329 | -0.191 | 1.667 | 1.857 |
| 0.118 | 0.298 | -4.566 | 0.458  | 3.433 | 2.975 |
| 0.292 | 0.490 | -5.190 | 0.362  | 3.235 | 2.873 |
| 0.017 | 0.162 | -3.052 | 0.659  | 2.694 | 2.035 |
| 0.121 | 0.302 | -4.583 | 0.479  | 2.744 | 2.265 |
| 0.674 | 0.804 | -5.631 | -0.097 | 2.596 | 2.693 |
| 0.073 | 0.241 | -4.206 | 0.423  | 6.993 | 6.569 |
| 0.314 | 0.512 | -5.236 | 0.208  | 4.948 | 4.739 |
| 0.007 | 0.157 | -2.380 | -0.941 | 5.098 | 6.039 |
| 0.070 | 0.237 | -4.175 | 0.427  | 4.116 | 3.688 |
| 0.121 | 0.302 | -4.582 | 0.353  | 7.049 | 6.697 |
| 0.375 | 0.565 | -5.342 | -0.279 | 4.741 | 5.020 |
| 0.217 | 0.412 | -4.994 | -0.373 | 1.982 | 2.355 |
| 0.015 | 0.161 | -2.974 | 0.752  | 5.820 | 5.068 |
| 0.241 | 0.438 | -5.065 | 0.304  | 4.393 | 4.089 |
| 0.410 | 0.597 | -5.394 | 0.455  | 5.895 | 5.441 |
| 0.864 | 0.927 | -5.701 | 0.108  | 4.580 | 4.471 |
| 0.071 | 0.239 | -4.184 | 1.245  | 5.799 | 4.554 |
| 0.142 | 0.326 | -4.697 | 0.761  | 5.360 | 4.599 |
| 0.248 | 0.446 | -5.084 | 0.215  | 6.103 | 5.888 |
| 0.028 | 0.177 | -3.441 | -0.588 | 5.876 | 6.464 |
| 0.016 | 0.162 | -2.993 | -0.649 | 4.417 | 5.066 |
| 0.958 | 0.978 | -5.713 | 0.012  | 6.135 | 6.124 |
| 0.126 | 0.306 | -4.610 | 0.315  | 6.125 | 5.810 |
| 0.943 | 0.969 | -5.712 | 0.020  | 3.663 | 3.643 |
| 0.019 | 0.166 | -3.162 | 0.734  | 2.676 | 1.943 |
| 0.018 | 0.162 | -3.084 | 1.106  | 6.930 | 5.824 |

|       |       |        |        |       |       |
|-------|-------|--------|--------|-------|-------|
| 0.395 | 0.582 | -5.372 | 0.231  | 6.994 | 6.763 |
| 0.020 | 0.167 | -3.179 | 0.892  | 9.462 | 8.570 |
| 0.482 | 0.658 | -5.480 | 0.189  | 6.480 | 6.291 |
| 0.007 | 0.157 | -2.342 | 1.006  | 5.037 | 4.031 |
| 0.092 | 0.267 | -4.379 | -0.435 | 4.358 | 4.793 |
| 0.128 | 0.310 | -4.625 | -0.427 | 5.266 | 5.692 |
| 0.025 | 0.175 | -3.374 | -0.688 | 1.482 | 2.171 |
| 0.044 | 0.200 | -3.806 | -0.776 | 3.756 | 4.532 |
| 0.568 | 0.724 | -5.560 | -0.220 | 4.682 | 4.902 |
| 0.063 | 0.227 | -4.095 | -0.568 | 7.132 | 7.699 |
| 0.047 | 0.204 | -3.861 | -0.624 | 6.699 | 7.323 |
| 0.456 | 0.637 | -5.452 | 0.244  | 4.715 | 4.470 |
| 0.038 | 0.192 | -3.699 | 0.524  | 4.519 | 3.995 |
| 0.120 | 0.300 | -4.573 | -0.476 | 8.090 | 8.566 |
| 0.751 | 0.856 | -5.667 | 0.086  | 2.773 | 2.687 |
| 0.449 | 0.630 | -5.443 | -0.211 | 4.875 | 5.087 |
| 0.016 | 0.162 | -3.019 | -0.972 | 3.741 | 4.713 |
| 0.284 | 0.481 | -5.172 | -0.272 | 1.838 | 2.110 |
| 0.248 | 0.446 | -5.085 | -0.288 | 4.572 | 4.860 |
| 0.469 | 0.648 | -5.467 | 0.246  | 3.081 | 2.835 |
| 0.124 | 0.305 | -4.599 | -0.478 | 3.854 | 4.332 |
| 0.100 | 0.278 | -4.444 | -0.376 | 5.263 | 5.640 |
| 0.039 | 0.193 | -3.716 | 0.473  | 5.335 | 4.862 |
| 0.181 | 0.372 | -4.870 | -0.399 | 8.420 | 8.819 |
| 0.432 | 0.617 | -5.422 | -0.207 | 2.960 | 3.167 |
| 0.334 | 0.530 | -5.274 | -0.270 | 2.302 | 2.572 |
| 0.089 | 0.264 | -4.357 | 0.339  | 6.566 | 6.227 |
| 0.074 | 0.242 | -4.214 | -0.402 | 6.777 | 7.179 |
| 0.007 | 0.157 | -2.289 | -0.916 | 1.919 | 2.835 |
| 0.998 | 0.999 | -5.715 | 0.001  | 6.995 | 6.994 |
| 0.134 | 0.318 | -4.658 | 0.654  | 4.440 | 3.786 |
| 0.005 | 0.157 | -2.079 | -1.690 | 5.471 | 7.161 |
| 0.043 | 0.199 | -3.789 | 1.440  | 6.447 | 5.007 |
| 0.251 | 0.448 | -5.091 | 0.292  | 2.940 | 2.648 |
| 0.270 | 0.468 | -5.139 | 0.411  | 3.513 | 3.101 |
| 0.105 | 0.283 | -4.477 | -0.394 | 3.819 | 4.212 |
| 0.679 | 0.808 | -5.634 | -0.100 | 2.940 | 3.040 |
| 0.482 | 0.658 | -5.481 | -0.167 | 3.690 | 3.857 |
| 0.152 | 0.339 | -4.746 | -0.502 | 4.602 | 5.104 |
| 0.293 | 0.491 | -5.192 | -0.306 | 1.746 | 2.052 |
| 0.100 | 0.277 | -4.440 | -0.505 | 4.221 | 4.726 |
| 0.038 | 0.192 | -3.701 | -0.558 | 1.933 | 2.491 |
| 0.292 | 0.489 | -5.189 | 0.314  | 2.887 | 2.574 |
| 0.262 | 0.460 | -5.121 | -0.288 | 2.716 | 3.004 |
| 0.035 | 0.186 | -3.632 | 0.619  | 6.560 | 5.941 |
| 0.298 | 0.495 | -5.202 | 0.240  | 4.260 | 4.019 |
| 0.624 | 0.767 | -5.601 | 0.165  | 4.394 | 4.229 |
| 0.125 | 0.306 | -4.606 | -0.407 | 1.947 | 2.354 |
| 0.011 | 0.157 | -2.680 | -0.978 | 1.788 | 2.766 |
| 0.012 | 0.160 | -2.771 | -1.012 | 1.982 | 2.995 |

|       |       |        |        |       |       |
|-------|-------|--------|--------|-------|-------|
| 0.019 | 0.164 | -3.144 | -0.927 | 2.109 | 3.036 |
| 0.253 | 0.451 | -5.098 | -0.349 | 3.117 | 3.467 |
| 0.064 | 0.229 | -4.108 | -0.615 | 3.038 | 3.654 |
| 0.143 | 0.327 | -4.705 | -0.422 | 3.128 | 3.550 |
| 0.231 | 0.428 | -5.037 | -0.482 | 4.479 | 4.961 |
| 0.592 | 0.744 | -5.579 | -0.219 | 5.047 | 5.267 |
| 0.022 | 0.171 | -3.276 | 2.045  | 9.259 | 7.213 |
| 0.111 | 0.290 | -4.517 | 0.396  | 4.000 | 3.604 |
| 0.064 | 0.227 | -4.097 | 0.659  | 4.027 | 3.368 |
| 0.318 | 0.516 | -5.243 | 0.284  | 3.827 | 3.543 |
| 0.519 | 0.686 | -5.518 | 0.201  | 3.479 | 3.278 |
| 0.969 | 0.985 | -5.714 | -0.011 | 4.151 | 4.162 |
| 0.925 | 0.959 | -5.711 | -0.027 | 3.354 | 3.381 |
| 0.490 | 0.664 | -5.489 | -0.292 | 3.704 | 3.996 |
| 0.004 | 0.157 | -1.867 | -0.733 | 4.822 | 5.555 |
| 0.868 | 0.928 | -5.702 | -0.035 | 3.695 | 3.730 |
| 0.648 | 0.784 | -5.616 | 0.101  | 5.097 | 4.995 |
| 0.039 | 0.193 | -3.721 | 0.429  | 8.326 | 7.896 |
| 0.058 | 0.219 | -4.028 | -0.474 | 6.000 | 6.474 |
| 0.302 | 0.500 | -5.211 | -0.245 | 4.316 | 4.561 |
| 0.078 | 0.247 | -4.250 | 0.528  | 5.477 | 4.949 |
| 0.009 | 0.157 | -2.508 | 1.340  | 6.822 | 5.482 |
| 0.041 | 0.195 | -3.757 | 0.811  | 3.606 | 2.796 |
| 0.738 | 0.848 | -5.662 | 0.076  | 7.162 | 7.086 |
| 0.388 | 0.576 | -5.363 | -0.301 | 7.291 | 7.592 |
| 0.784 | 0.877 | -5.679 | 0.072  | 2.545 | 2.473 |
| 0.948 | 0.973 | -5.713 | -0.015 | 1.984 | 1.999 |
| 0.941 | 0.969 | -5.712 | 0.015  | 1.979 | 1.964 |
| 0.664 | 0.796 | -5.626 | 0.115  | 5.118 | 5.003 |
| 0.004 | 0.157 | -1.886 | -0.880 | 6.418 | 7.298 |
| 0.090 | 0.265 | -4.363 | -0.542 | 3.539 | 4.081 |
| 0.027 | 0.176 | -3.427 | 0.441  | 8.168 | 7.727 |
| 0.036 | 0.189 | -3.662 | -0.830 | 4.184 | 5.014 |
| 0.019 | 0.164 | -3.133 | -0.539 | 3.121 | 3.660 |
| 0.031 | 0.181 | -3.539 | 0.700  | 6.775 | 6.075 |
| 0.903 | 0.947 | -5.708 | 0.032  | 6.953 | 6.921 |
| 0.050 | 0.208 | -3.917 | 0.547  | 5.016 | 4.469 |
| 0.979 | 0.989 | -5.714 | -0.008 | 3.375 | 3.383 |
| 0.842 | 0.912 | -5.696 | -0.052 | 6.013 | 6.065 |
| 0.518 | 0.685 | -5.517 | 0.184  | 4.449 | 4.266 |
| 0.031 | 0.180 | -3.524 | -0.763 | 4.868 | 5.631 |
| 0.214 | 0.409 | -4.986 | -0.474 | 2.416 | 2.890 |
| 0.317 | 0.515 | -5.242 | -0.222 | 2.349 | 2.571 |
| 0.000 | 0.157 | 0.153  | 1.445  | 5.109 | 3.663 |
| 0.048 | 0.205 | -3.878 | -0.894 | 5.878 | 6.772 |
| 0.059 | 0.221 | -4.040 | -0.830 | 5.095 | 5.924 |
| 0.281 | 0.479 | -5.166 | -0.293 | 3.310 | 3.603 |
| 0.152 | 0.339 | -4.749 | 0.374  | 4.645 | 4.271 |
| 0.004 | 0.157 | -1.929 | -0.834 | 4.229 | 5.063 |
| 0.478 | 0.655 | -5.476 | -0.178 | 5.572 | 5.749 |

|       |       |        |        |       |       |
|-------|-------|--------|--------|-------|-------|
| 0.511 | 0.679 | -5.510 | 0.155  | 8.670 | 8.515 |
| 0.633 | 0.773 | -5.607 | 0.205  | 2.791 | 2.586 |
| 0.990 | 0.995 | -5.715 | -0.006 | 2.425 | 2.431 |
| 0.145 | 0.329 | -4.714 | -0.499 | 4.205 | 4.704 |
| 0.049 | 0.207 | -3.902 | -0.539 | 4.009 | 4.547 |
| 0.953 | 0.976 | -5.713 | -0.031 | 6.269 | 6.299 |
| 0.009 | 0.157 | -2.569 | -0.927 | 5.933 | 6.859 |
| 0.011 | 0.157 | -2.674 | -0.849 | 5.145 | 5.993 |
| 0.061 | 0.224 | -4.068 | -0.593 | 2.518 | 3.111 |
| 0.033 | 0.184 | -3.577 | -0.615 | 9.158 | 9.773 |
| 0.272 | 0.471 | -5.145 | -0.263 | 6.004 | 6.267 |
| 0.707 | 0.826 | -5.648 | -0.102 | 5.014 | 5.116 |
| 0.958 | 0.978 | -5.713 | -0.014 | 8.091 | 8.105 |
| 0.001 | 0.157 | -0.512 | -0.971 | 5.660 | 6.631 |
| 0.603 | 0.752 | -5.587 | 0.217  | 4.727 | 4.510 |
| 0.118 | 0.298 | -4.566 | -0.609 | 1.897 | 2.506 |
| 0.510 | 0.679 | -5.509 | -0.319 | 4.434 | 4.753 |
| 0.481 | 0.658 | -5.480 | -0.306 | 2.087 | 2.393 |
| 0.945 | 0.971 | -5.713 | -0.025 | 3.802 | 3.827 |
| 0.568 | 0.724 | -5.560 | -0.267 | 3.309 | 3.576 |
| 0.745 | 0.851 | -5.664 | -0.114 | 3.263 | 3.377 |
| 0.815 | 0.896 | -5.689 | -0.146 | 4.234 | 4.380 |
| 0.085 | 0.257 | -4.318 | -0.839 | 2.242 | 3.081 |
| 0.510 | 0.679 | -5.509 | -0.213 | 5.758 | 5.971 |
| 0.696 | 0.819 | -5.643 | -0.217 | 4.437 | 4.654 |
| 0.778 | 0.872 | -5.677 | -0.114 | 2.759 | 2.873 |
| 0.807 | 0.892 | -5.687 | 0.081  | 2.014 | 1.933 |
| 0.350 | 0.545 | -5.302 | 0.393  | 4.329 | 3.937 |
| 0.026 | 0.176 | -3.402 | -1.240 | 1.917 | 3.157 |
| 0.270 | 0.468 | -5.140 | -0.467 | 3.540 | 4.008 |
| 0.450 | 0.631 | -5.445 | -0.525 | 3.134 | 3.659 |
| 0.013 | 0.160 | -2.842 | -0.791 | 3.261 | 4.052 |
| 0.726 | 0.838 | -5.656 | 0.127  | 5.643 | 5.516 |
| 0.035 | 0.186 | -3.621 | -0.838 | 3.546 | 4.383 |
| 0.051 | 0.210 | -3.931 | 0.503  | 9.535 | 9.033 |
| 0.196 | 0.390 | -4.925 | -0.551 | 2.552 | 3.103 |
| 0.323 | 0.519 | -5.253 | -0.393 | 6.919 | 7.312 |
| 0.206 | 0.401 | -4.959 | -0.259 | 9.125 | 9.385 |
| 0.210 | 0.404 | -4.972 | -0.301 | 6.152 | 6.453 |
| 0.059 | 0.220 | -4.034 | -0.695 | 4.835 | 5.530 |
| 0.018 | 0.162 | -3.077 | -0.870 | 4.308 | 5.178 |
| 0.815 | 0.896 | -5.689 | -0.076 | 3.837 | 3.913 |
| 0.864 | 0.927 | -5.701 | -0.063 | 4.942 | 5.005 |
| 0.034 | 0.185 | -3.608 | -0.694 | 3.736 | 4.430 |
| 0.049 | 0.206 | -3.890 | -0.776 | 5.395 | 6.171 |
| 0.740 | 0.849 | -5.663 | 0.140  | 4.102 | 3.962 |
| 0.096 | 0.272 | -4.409 | 0.387  | 5.567 | 5.181 |
| 0.040 | 0.194 | -3.734 | 0.700  | 9.107 | 8.407 |
| 0.031 | 0.182 | -3.546 | 0.637  | 7.518 | 6.881 |
| 0.050 | 0.207 | -3.903 | -0.913 | 3.743 | 4.657 |

|       |       |        |        |       |       |
|-------|-------|--------|--------|-------|-------|
| 0.302 | 0.499 | -5.210 | 0.272  | 4.319 | 4.047 |
| 0.599 | 0.748 | -5.584 | -0.127 | 4.918 | 5.045 |
| 0.763 | 0.864 | -5.672 | -0.085 | 6.826 | 6.910 |
| 0.912 | 0.952 | -5.709 | 0.028  | 6.940 | 6.912 |
| 0.947 | 0.973 | -5.713 | 0.019  | 4.193 | 4.174 |
| 0.970 | 0.985 | -5.714 | -0.019 | 6.063 | 6.083 |
| 0.978 | 0.989 | -5.714 | -0.007 | 8.290 | 8.297 |
| 0.619 | 0.763 | -5.598 | 0.140  | 6.944 | 6.804 |
| 0.749 | 0.854 | -5.666 | 0.086  | 8.087 | 8.001 |
| 0.776 | 0.871 | -5.676 | 0.075  | 8.087 | 8.012 |
| 0.046 | 0.203 | -3.844 | -0.520 | 4.711 | 5.231 |
| 0.342 | 0.538 | -5.288 | -0.243 | 7.271 | 7.514 |
| 0.435 | 0.619 | -5.427 | -0.196 | 6.924 | 7.121 |
| 0.519 | 0.686 | -5.518 | 0.169  | 6.946 | 6.777 |
| 0.599 | 0.749 | -5.584 | -0.123 | 6.780 | 6.903 |
| 0.635 | 0.774 | -5.608 | 0.130  | 6.944 | 6.814 |
| 0.198 | 0.392 | -4.932 | -0.407 | 4.696 | 5.103 |
| 0.356 | 0.550 | -5.312 | -0.327 | 4.493 | 4.819 |
| 0.444 | 0.627 | -5.437 | -0.262 | 4.693 | 4.955 |
| 0.409 | 0.596 | -5.392 | -0.309 | 4.657 | 4.965 |
| 0.422 | 0.608 | -5.410 | -0.287 | 4.664 | 4.952 |
| 0.396 | 0.583 | -5.374 | -0.334 | 4.657 | 4.991 |
| 0.474 | 0.652 | -5.472 | -0.278 | 4.699 | 4.977 |
| 0.280 | 0.478 | -5.164 | -0.451 | 4.345 | 4.796 |
| 0.323 | 0.520 | -5.253 | -0.410 | 4.378 | 4.788 |
| 0.348 | 0.544 | -5.299 | -0.376 | 3.645 | 4.021 |
| 0.096 | 0.272 | -4.409 | -0.522 | 4.041 | 4.563 |
| 0.206 | 0.401 | -4.959 | -0.422 | 3.630 | 4.052 |
| 0.212 | 0.407 | -4.979 | -0.403 | 2.279 | 2.682 |
| 0.216 | 0.411 | -4.991 | -0.423 | 3.614 | 4.036 |
| 0.226 | 0.423 | -5.021 | -0.408 | 2.364 | 2.771 |
| 0.335 | 0.531 | -5.275 | -0.353 | 4.145 | 4.499 |
| 0.350 | 0.545 | -5.302 | -0.345 | 4.127 | 4.471 |
| 0.362 | 0.554 | -5.322 | -0.326 | 3.218 | 3.544 |
| 0.375 | 0.565 | -5.342 | -0.339 | 4.327 | 4.665 |
| 0.427 | 0.612 | -5.416 | -0.309 | 3.080 | 3.389 |
| 0.349 | 0.544 | -5.300 | -0.352 | 6.499 | 6.851 |
| 0.381 | 0.571 | -5.352 | -0.325 | 4.570 | 4.895 |
| 0.512 | 0.680 | -5.511 | -0.233 | 5.809 | 6.041 |
| 0.531 | 0.695 | -5.529 | -0.229 | 5.785 | 6.013 |
| 0.285 | 0.482 | -5.174 | 0.360  | 3.368 | 3.008 |
| 0.308 | 0.505 | -5.223 | -0.372 | 1.697 | 2.069 |
| 0.356 | 0.550 | -5.311 | -0.263 | 1.748 | 2.012 |
| 0.362 | 0.554 | -5.323 | -0.279 | 1.886 | 2.165 |
| 0.784 | 0.877 | -5.679 | -0.125 | 4.331 | 4.456 |
| 0.863 | 0.927 | -5.701 | 0.085  | 4.934 | 4.848 |
| 0.868 | 0.928 | -5.702 | -0.085 | 4.151 | 4.236 |
| 0.699 | 0.820 | -5.644 | 0.145  | 3.224 | 3.079 |
| 0.739 | 0.848 | -5.662 | 0.124  | 3.841 | 3.717 |
| 0.743 | 0.851 | -5.664 | 0.126  | 4.442 | 4.316 |

|       |       |        |        |       |       |
|-------|-------|--------|--------|-------|-------|
| 0.765 | 0.865 | -5.672 | 0.109  | 3.817 | 3.708 |
| 0.771 | 0.869 | -5.675 | 0.105  | 4.023 | 3.917 |
| 0.773 | 0.869 | -5.675 | 0.109  | 3.992 | 3.883 |
| 0.827 | 0.902 | -5.692 | 0.075  | 4.685 | 4.609 |
| 0.774 | 0.871 | -5.676 | -0.098 | 4.145 | 4.244 |
| 0.979 | 0.989 | -5.714 | -0.008 | 3.148 | 3.156 |
| 0.457 | 0.637 | -5.453 | 0.197  | 2.702 | 2.505 |
| 0.517 | 0.684 | -5.516 | 0.167  | 2.489 | 2.321 |
| 0.691 | 0.815 | -5.640 | 0.101  | 2.320 | 2.219 |
| 0.725 | 0.838 | -5.656 | 0.091  | 2.296 | 2.206 |
| 0.867 | 0.928 | -5.701 | 0.046  | 2.229 | 2.183 |
| 0.866 | 0.928 | -5.701 | -0.100 | 6.907 | 7.007 |
| 0.596 | 0.747 | -5.582 | -0.233 | 8.321 | 8.554 |
| 0.618 | 0.762 | -5.597 | -0.221 | 8.358 | 8.579 |
| 0.692 | 0.816 | -5.640 | -0.173 | 8.023 | 8.196 |
| 0.701 | 0.822 | -5.645 | -0.171 | 8.227 | 8.398 |
| 0.148 | 0.332 | -4.726 | 2.404  | 4.719 | 2.316 |
| 0.930 | 0.962 | -5.711 | 0.028  | 3.504 | 3.476 |
| 0.992 | 0.996 | -5.715 | -0.003 | 3.587 | 3.590 |
| 0.689 | 0.814 | -5.639 | 0.132  | 6.366 | 6.234 |
| 0.279 | 0.477 | -5.161 | 0.793  | 3.295 | 2.502 |
| 0.880 | 0.935 | -5.704 | 0.051  | 5.499 | 5.448 |
| 0.937 | 0.966 | -5.712 | 0.030  | 7.141 | 7.111 |
| 0.865 | 0.928 | -5.701 | 0.104  | 6.060 | 5.956 |
| 0.989 | 0.994 | -5.715 | 0.010  | 4.998 | 4.988 |
| 0.179 | 0.369 | -4.861 | 2.204  | 4.660 | 2.456 |
| 0.533 | 0.696 | -5.531 | 0.139  | 2.188 | 2.049 |
| 0.675 | 0.805 | -5.631 | 0.106  | 8.068 | 7.962 |
| 0.694 | 0.816 | -5.641 | 0.098  | 8.104 | 8.005 |
| 0.660 | 0.793 | -5.623 | 0.089  | 5.030 | 4.941 |
| 0.800 | 0.888 | -5.684 | -0.060 | 4.567 | 4.627 |
| 0.903 | 0.947 | -5.708 | -0.026 | 4.707 | 4.733 |
| 0.922 | 0.958 | -5.710 | -0.023 | 4.647 | 4.670 |
| 0.211 | 0.406 | -4.977 | -0.242 | 3.528 | 3.769 |
| 0.528 | 0.693 | -5.527 | -0.124 | 3.409 | 3.533 |
| 0.581 | 0.735 | -5.570 | -0.108 | 3.166 | 3.274 |
| 0.764 | 0.864 | -5.672 | -0.088 | 4.983 | 5.071 |
| 0.010 | 0.157 | -2.612 | 1.520  | 8.838 | 7.319 |
| 0.673 | 0.803 | -5.630 | -0.091 | 2.281 | 2.372 |
| 0.671 | 0.802 | -5.630 | -0.134 | 2.211 | 2.345 |
| 0.061 | 0.223 | -4.064 | 0.427  | 6.437 | 6.010 |
| 0.022 | 0.169 | -3.245 | -0.548 | 3.380 | 3.928 |
| 0.399 | 0.586 | -5.378 | 0.261  | 6.272 | 6.011 |
| 0.232 | 0.429 | -5.041 | -0.360 | 2.748 | 3.108 |
| 0.897 | 0.943 | -5.707 | -0.033 | 4.098 | 4.131 |
| 0.202 | 0.397 | -4.946 | 0.369  | 7.669 | 7.300 |
| 0.294 | 0.491 | -5.194 | 0.345  | 6.819 | 6.474 |
| 0.096 | 0.272 | -4.411 | -0.485 | 3.699 | 4.184 |
| 0.233 | 0.430 | -5.044 | -0.383 | 2.859 | 3.242 |
| 0.919 | 0.957 | -5.710 | 0.025  | 4.124 | 4.099 |

|       |       |        |        |       |       |
|-------|-------|--------|--------|-------|-------|
| 0.076 | 0.245 | -4.229 | -0.549 | 3.818 | 4.367 |
| 0.206 | 0.401 | -4.960 | -0.424 | 4.470 | 4.895 |
| 0.018 | 0.162 | -3.084 | 0.757  | 4.775 | 4.017 |
| 0.034 | 0.184 | -3.601 | -0.736 | 2.673 | 3.409 |
| 0.541 | 0.703 | -5.538 | -0.170 | 2.406 | 2.576 |
| 0.094 | 0.270 | -4.393 | 0.457  | 5.837 | 5.380 |
| 0.007 | 0.157 | -2.346 | -1.513 | 4.320 | 5.833 |
| 0.083 | 0.255 | -4.303 | -0.462 | 3.939 | 4.401 |
| 0.865 | 0.928 | -5.701 | 0.070  | 3.625 | 3.555 |
| 0.073 | 0.241 | -4.207 | 0.395  | 4.851 | 4.456 |
| 0.659 | 0.793 | -5.622 | -0.124 | 6.171 | 6.295 |
| 0.126 | 0.306 | -4.609 | -0.491 | 1.922 | 2.414 |
| 0.009 | 0.157 | -2.527 | 1.024  | 7.595 | 6.571 |
| 0.071 | 0.238 | -4.180 | -0.502 | 3.883 | 4.385 |
| 0.013 | 0.160 | -2.861 | 1.801  | 5.941 | 4.141 |
| 0.016 | 0.162 | -3.011 | -1.042 | 1.892 | 2.934 |
| 0.047 | 0.204 | -3.866 | -0.553 | 1.645 | 2.198 |
| 0.742 | 0.850 | -5.663 | -0.104 | 1.878 | 1.983 |
| 0.455 | 0.636 | -5.450 | -0.216 | 2.208 | 2.424 |
| 0.019 | 0.164 | -3.127 | -1.647 | 1.319 | 2.966 |
| 0.091 | 0.267 | -4.372 | -1.122 | 1.746 | 2.867 |
| 0.010 | 0.157 | -2.655 | -1.942 | 2.021 | 3.963 |
| 0.255 | 0.452 | -5.103 | -0.397 | 2.696 | 3.093 |
| 0.160 | 0.349 | -4.784 | -0.412 | 2.404 | 2.816 |
| 0.046 | 0.203 | -3.840 | -0.908 | 2.232 | 3.141 |
| 0.283 | 0.481 | -5.171 | -0.418 | 1.635 | 2.053 |
| 0.368 | 0.559 | -5.331 | -0.329 | 2.227 | 2.555 |
| 0.033 | 0.184 | -3.574 | -1.327 | 1.437 | 2.764 |
| 0.220 | 0.416 | -5.005 | -0.407 | 2.180 | 2.587 |
| 0.397 | 0.585 | -5.375 | -0.231 | 1.522 | 1.753 |
| 0.897 | 0.943 | -5.707 | -0.047 | 2.176 | 2.223 |
| 0.798 | 0.887 | -5.684 | 0.094  | 2.705 | 2.611 |
| 0.042 | 0.198 | -3.781 | -0.672 | 1.704 | 2.376 |
| 0.099 | 0.276 | -4.436 | 0.529  | 2.456 | 1.927 |
| 0.074 | 0.241 | -4.209 | -0.377 | 1.442 | 1.819 |
| 0.737 | 0.847 | -5.661 | 0.081  | 2.420 | 2.340 |
| 0.485 | 0.660 | -5.484 | 0.147  | 1.439 | 1.292 |
| 0.366 | 0.557 | -5.328 | -0.273 | 1.139 | 1.412 |
| 0.216 | 0.411 | -4.992 | -0.348 | 2.592 | 2.940 |
| 0.008 | 0.157 | -2.472 | -1.204 | 2.240 | 3.443 |
| 0.753 | 0.857 | -5.668 | 0.134  | 2.283 | 2.149 |
| 0.016 | 0.162 | -3.026 | -1.103 | 1.713 | 2.817 |
| 0.119 | 0.299 | -4.572 | -0.624 | 2.125 | 2.750 |
| 0.114 | 0.293 | -4.538 | -0.645 | 2.572 | 3.217 |
| 0.284 | 0.481 | -5.171 | -0.291 | 1.884 | 2.175 |
| 0.881 | 0.935 | -5.704 | -0.137 | 1.679 | 1.815 |
| 0.744 | 0.851 | -5.664 | 0.078  | 3.755 | 3.677 |
| 0.011 | 0.157 | -2.697 | 1.103  | 7.391 | 6.288 |
| 0.256 | 0.454 | -5.106 | -0.293 | 1.582 | 1.875 |
| 0.247 | 0.445 | -5.082 | -0.554 | 3.042 | 3.596 |



|       |       |        |        |        |        |
|-------|-------|--------|--------|--------|--------|
| 0.100 | 0.277 | -4.440 | -0.495 | 3.120  | 3.615  |
| 0.301 | 0.499 | -5.209 | -0.344 | 2.921  | 3.265  |
| 0.011 | 0.157 | -2.701 | 0.782  | 7.155  | 6.373  |
| 0.123 | 0.304 | -4.594 | -0.381 | 6.814  | 7.196  |
| 0.231 | 0.428 | -5.036 | -0.320 | 5.346  | 5.666  |
| 0.469 | 0.648 | -5.466 | -0.183 | 2.296  | 2.479  |
| 0.868 | 0.928 | -5.702 | -0.057 | 2.922  | 2.979  |
| 0.272 | 0.471 | -5.146 | -0.484 | 4.390  | 4.874  |
| 0.686 | 0.812 | -5.638 | 0.108  | 3.668  | 3.561  |
| 0.890 | 0.940 | -5.706 | -0.038 | 3.755  | 3.793  |
| 0.746 | 0.853 | -5.665 | -0.103 | 4.970  | 5.073  |
| 0.006 | 0.157 | -2.239 | 0.828  | 4.681  | 3.853  |
| 0.034 | 0.184 | -3.600 | 1.064  | 5.791  | 4.727  |
| 0.028 | 0.177 | -3.441 | 0.604  | 2.902  | 2.298  |
| 0.015 | 0.161 | -2.977 | 0.580  | 6.589  | 6.009  |
| 0.003 | 0.157 | -1.742 | 1.221  | 4.577  | 3.356  |
| 0.963 | 0.981 | -5.714 | 0.020  | 2.742  | 2.722  |
| 0.294 | 0.491 | -5.195 | 0.338  | 3.002  | 2.664  |
| 0.159 | 0.347 | -4.778 | -0.499 | 5.123  | 5.622  |
| 0.613 | 0.758 | -5.594 | 0.140  | 4.016  | 3.876  |
| 0.339 | 0.535 | -5.283 | 0.288  | 3.648  | 3.360  |
| 0.050 | 0.208 | -3.913 | 1.071  | 8.045  | 6.974  |
| 0.621 | 0.764 | -5.599 | 0.149  | 4.814  | 4.665  |
| 0.013 | 0.160 | -2.828 | 0.751  | 5.866  | 5.115  |
| 0.608 | 0.755 | -5.590 | 0.161  | 2.976  | 2.815  |
| 0.135 | 0.319 | -4.663 | -0.462 | 3.296  | 3.758  |
| 0.190 | 0.383 | -4.904 | 0.325  | 5.540  | 5.215  |
| 0.007 | 0.157 | -2.379 | -0.633 | 4.465  | 5.098  |
| 0.056 | 0.216 | -3.992 | 0.490  | 2.685  | 2.195  |
| 0.277 | 0.475 | -5.156 | 0.241  | 4.469  | 4.229  |
| 0.698 | 0.820 | -5.644 | -0.115 | 3.643  | 3.758  |
| 0.055 | 0.215 | -3.980 | -0.773 | 2.528  | 3.301  |
| 0.137 | 0.320 | -4.670 | 0.397  | 3.621  | 3.224  |
| 0.794 | 0.884 | -5.682 | 0.065  | 5.160  | 5.095  |
| 0.502 | 0.672 | -5.502 | -0.186 | 3.031  | 3.216  |
| 0.975 | 0.987 | -5.714 | -0.008 | 3.401  | 3.409  |
| 0.083 | 0.255 | -4.304 | 0.496  | 7.844  | 7.347  |
| 0.082 | 0.254 | -4.294 | 0.470  | 5.852  | 5.382  |
| 0.853 | 0.921 | -5.699 | 0.054  | 4.192  | 4.138  |
| 0.074 | 0.242 | -4.215 | 0.648  | 4.574  | 3.927  |
| 0.350 | 0.545 | -5.302 | 0.259  | 5.262  | 5.002  |
| 0.324 | 0.520 | -5.255 | 0.403  | 5.882  | 5.479  |
| 0.112 | 0.291 | -4.526 | -0.606 | 2.378  | 2.984  |
| 0.277 | 0.475 | -5.156 | 0.365  | 8.102  | 7.738  |
| 0.023 | 0.172 | -3.286 | 0.569  | 2.863  | 2.294  |
| 0.415 | 0.602 | -5.400 | 0.231  | 3.252  | 3.021  |
| 0.329 | 0.524 | -5.263 | 0.215  | 4.899  | 4.684  |
| 0.041 | 0.196 | -3.764 | -0.674 | 9.971  | 10.645 |
| 0.043 | 0.199 | -3.792 | -0.664 | 10.064 | 10.729 |
| 0.053 | 0.213 | -3.956 | -0.673 | 9.508  | 10.181 |

|       |       |        |        |       |        |
|-------|-------|--------|--------|-------|--------|
| 0.064 | 0.228 | -4.103 | -0.631 | 9.258 | 9.888  |
| 0.055 | 0.216 | -3.983 | -0.629 | 9.728 | 10.356 |
| 0.062 | 0.224 | -4.074 | -0.605 | 9.437 | 10.042 |
| 0.076 | 0.245 | -4.231 | -0.614 | 9.323 | 9.937  |
| 0.084 | 0.256 | -4.310 | -0.614 | 9.304 | 9.918  |
| 0.365 | 0.557 | -5.327 | -0.246 | 4.306 | 4.552  |
| 0.517 | 0.684 | -5.516 | -0.175 | 4.642 | 4.817  |
| 0.004 | 0.157 | -1.949 | -1.259 | 7.594 | 8.853  |
| 0.347 | 0.543 | -5.297 | 0.282  | 7.840 | 7.558  |
| 0.277 | 0.475 | -5.156 | -0.304 | 9.149 | 9.453  |
| 0.247 | 0.444 | -5.081 | -0.476 | 2.359 | 2.835  |
| 0.826 | 0.902 | -5.692 | 0.095  | 2.054 | 1.959  |
| 0.339 | 0.534 | -5.282 | -0.367 | 8.948 | 9.315  |
| 0.028 | 0.178 | -3.453 | 1.078  | 3.696 | 2.618  |
| 0.132 | 0.315 | -4.646 | -0.497 | 4.373 | 4.870  |
| 0.086 | 0.258 | -4.323 | -0.427 | 2.081 | 2.509  |
| 0.609 | 0.756 | -5.591 | -0.131 | 4.710 | 4.842  |
| 0.449 | 0.631 | -5.444 | -0.170 | 3.637 | 3.807  |
| 0.514 | 0.681 | -5.513 | 0.239  | 9.400 | 9.161  |
| 0.184 | 0.375 | -4.882 | -0.452 | 5.171 | 5.623  |
| 0.217 | 0.412 | -4.996 | 0.687  | 4.848 | 4.161  |
| 0.023 | 0.173 | -3.309 | 0.952  | 4.616 | 3.664  |
| 0.006 | 0.157 | -2.143 | 1.683  | 5.728 | 4.045  |
| 0.016 | 0.162 | -2.989 | 0.965  | 4.041 | 3.076  |
| 0.006 | 0.157 | -2.145 | 1.779  | 8.875 | 7.096  |
| 0.447 | 0.629 | -5.441 | -0.501 | 3.598 | 4.100  |
| 0.094 | 0.270 | -4.391 | 0.890  | 4.640 | 3.751  |
| 0.253 | 0.451 | -5.098 | 0.310  | 4.035 | 3.725  |
| 0.050 | 0.208 | -3.916 | 0.990  | 5.971 | 4.980  |
| 0.018 | 0.163 | -3.103 | 1.201  | 5.469 | 4.268  |
| 0.110 | 0.289 | -4.514 | -0.417 | 1.925 | 2.342  |
| 0.009 | 0.157 | -2.538 | 1.221  | 5.390 | 4.169  |
| 0.106 | 0.284 | -4.482 | -0.447 | 2.943 | 3.390  |
| 0.523 | 0.689 | -5.522 | -0.188 | 2.655 | 2.843  |
| 0.054 | 0.215 | -3.978 | -0.550 | 2.836 | 3.385  |
| 0.649 | 0.785 | -5.617 | -0.141 | 4.251 | 4.392  |
| 0.140 | 0.324 | -4.687 | -0.366 | 4.182 | 4.549  |
| 0.264 | 0.461 | -5.124 | -0.288 | 3.013 | 3.302  |
| 0.007 | 0.157 | -2.305 | 1.029  | 4.983 | 3.954  |
| 0.015 | 0.160 | -2.947 | 0.549  | 5.683 | 5.134  |
| 0.315 | 0.513 | -5.238 | 0.347  | 4.683 | 4.336  |
| 0.323 | 0.519 | -5.252 | 0.288  | 5.694 | 5.406  |
| 0.143 | 0.327 | -4.701 | 0.413  | 2.989 | 2.577  |
| 0.010 | 0.157 | -2.647 | 1.593  | 5.290 | 3.697  |
| 0.598 | 0.748 | -5.583 | 0.114  | 6.106 | 5.992  |
| 0.042 | 0.198 | -3.781 | -0.647 | 4.190 | 4.837  |
| 0.181 | 0.372 | -4.869 | 0.484  | 6.306 | 5.821  |
| 0.335 | 0.531 | -5.276 | 0.271  | 4.155 | 3.884  |
| 0.304 | 0.502 | -5.215 | -0.350 | 3.693 | 4.043  |
| 0.907 | 0.950 | -5.708 | -0.031 | 5.984 | 6.014  |

|       |       |        |        |       |       |
|-------|-------|--------|--------|-------|-------|
| 0.063 | 0.226 | -4.088 | 0.400  | 3.971 | 3.572 |
| 0.528 | 0.693 | -5.526 | 0.137  | 4.284 | 4.147 |
| 0.061 | 0.224 | -4.068 | 0.486  | 9.337 | 8.850 |
| 0.596 | 0.747 | -5.582 | 0.119  | 4.302 | 4.183 |
| 0.951 | 0.975 | -5.713 | -0.022 | 4.111 | 4.133 |
| 0.976 | 0.988 | -5.714 | -0.011 | 4.113 | 4.124 |
| 0.977 | 0.989 | -5.714 | 0.010  | 4.511 | 4.501 |
| 0.073 | 0.241 | -4.205 | 0.445  | 5.703 | 5.258 |
| 0.222 | 0.419 | -5.012 | 0.494  | 5.255 | 4.762 |
| 0.393 | 0.581 | -5.370 | 0.345  | 3.894 | 3.549 |
| 0.295 | 0.492 | -5.196 | -0.309 | 6.733 | 7.041 |
| 0.739 | 0.848 | -5.662 | -0.082 | 3.363 | 3.445 |
| 0.861 | 0.926 | -5.700 | -0.106 | 5.015 | 5.121 |
| 0.322 | 0.519 | -5.251 | 0.307  | 4.562 | 4.255 |
| 0.170 | 0.361 | -4.828 | -0.473 | 3.167 | 3.639 |
| 0.710 | 0.828 | -5.649 | -0.147 | 3.764 | 3.912 |
| 0.023 | 0.172 | -3.280 | 1.164  | 8.907 | 7.743 |
| 0.603 | 0.752 | -5.587 | 0.134  | 3.374 | 3.240 |
| 0.069 | 0.236 | -4.164 | 0.581  | 5.708 | 5.127 |
| 0.016 | 0.162 | -2.986 | -0.716 | 3.866 | 4.582 |
| 0.261 | 0.459 | -5.118 | 0.428  | 4.340 | 3.912 |
| 0.171 | 0.361 | -4.830 | 0.481  | 7.171 | 6.690 |
| 0.475 | 0.653 | -5.473 | 0.308  | 7.469 | 7.161 |
| 0.417 | 0.604 | -5.403 | 0.258  | 4.650 | 4.392 |
| 0.338 | 0.533 | -5.280 | 0.303  | 2.788 | 2.485 |
| 0.339 | 0.534 | -5.283 | 0.342  | 3.460 | 3.118 |
| 0.422 | 0.608 | -5.410 | 0.319  | 3.729 | 3.411 |
| 0.442 | 0.625 | -5.435 | 0.307  | 4.226 | 3.919 |
| 0.712 | 0.829 | -5.650 | -0.125 | 3.315 | 3.440 |
| 0.693 | 0.816 | -5.641 | 0.106  | 3.169 | 3.063 |
| 0.035 | 0.188 | -3.641 | -0.544 | 4.970 | 5.514 |
| 0.153 | 0.341 | -4.754 | -0.370 | 2.915 | 3.285 |
| 0.024 | 0.173 | -3.317 | 0.509  | 6.514 | 6.006 |
| 0.008 | 0.157 | -2.460 | 1.107  | 3.422 | 2.315 |
| 0.654 | 0.790 | -5.620 | -0.110 | 6.681 | 6.791 |
| 0.350 | 0.545 | -5.301 | -0.377 | 2.874 | 3.252 |
| 0.310 | 0.508 | -5.228 | -0.265 | 3.523 | 3.788 |
| 0.028 | 0.178 | -3.458 | 0.561  | 4.015 | 3.454 |
| 0.283 | 0.481 | -5.171 | -0.269 | 2.362 | 2.631 |
| 0.304 | 0.502 | -5.216 | 0.261  | 2.820 | 2.558 |
| 0.115 | 0.295 | -4.546 | 0.482  | 3.490 | 3.009 |
| 0.809 | 0.893 | -5.687 | 0.104  | 4.419 | 4.315 |
| 0.264 | 0.461 | -5.124 | 0.603  | 5.157 | 4.554 |
| 0.147 | 0.332 | -4.725 | -0.531 | 5.973 | 6.503 |
| 0.937 | 0.966 | -5.712 | -0.029 | 3.874 | 3.903 |
| 0.290 | 0.488 | -5.185 | 0.262  | 8.296 | 8.034 |
| 0.071 | 0.238 | -4.177 | 0.586  | 3.115 | 2.529 |
| 0.235 | 0.432 | -5.050 | 0.350  | 3.924 | 3.574 |
| 0.165 | 0.353 | -4.803 | -0.439 | 3.337 | 3.776 |
| 0.678 | 0.807 | -5.633 | 0.139  | 3.734 | 3.595 |

|       |       |        |        |       |       |
|-------|-------|--------|--------|-------|-------|
| 0.966 | 0.983 | -5.714 | 0.013  | 4.657 | 4.643 |
| 0.843 | 0.913 | -5.696 | -0.049 | 2.389 | 2.439 |
| 0.478 | 0.655 | -5.476 | -0.243 | 2.553 | 2.796 |
| 0.721 | 0.835 | -5.654 | -0.108 | 2.712 | 2.820 |
| 0.995 | 0.998 | -5.715 | -0.003 | 2.946 | 2.950 |
| 0.270 | 0.468 | -5.139 | -0.461 | 2.287 | 2.748 |
| 0.029 | 0.178 | -3.490 | 0.716  | 2.835 | 2.120 |
| 0.063 | 0.226 | -4.089 | -0.620 | 2.001 | 2.621 |
| 0.127 | 0.308 | -4.617 | 0.320  | 6.795 | 6.475 |
| 0.015 | 0.160 | -2.955 | -0.932 | 2.512 | 3.444 |
| 0.423 | 0.609 | -5.411 | 0.245  | 2.559 | 2.314 |
| 0.481 | 0.658 | -5.480 | 0.219  | 2.529 | 2.310 |
| 0.677 | 0.806 | -5.633 | -0.137 | 2.495 | 2.632 |
| 0.028 | 0.177 | -3.440 | -0.777 | 1.998 | 2.775 |
| 0.008 | 0.157 | -2.464 | -0.750 | 1.936 | 2.686 |
| 0.653 | 0.789 | -5.619 | 0.126  | 4.698 | 4.573 |
| 0.740 | 0.849 | -5.662 | 0.108  | 3.015 | 2.908 |
| 0.154 | 0.341 | -4.757 | -0.566 | 2.332 | 2.898 |
| 0.607 | 0.754 | -5.589 | 0.247  | 5.090 | 4.842 |
| 0.238 | 0.434 | -5.056 | 0.511  | 3.430 | 2.919 |
| 0.430 | 0.616 | -5.421 | -0.278 | 2.930 | 3.208 |
| 0.318 | 0.516 | -5.244 | -0.278 | 2.926 | 3.204 |
| 0.724 | 0.838 | -5.656 | -0.091 | 3.824 | 3.915 |
| 0.162 | 0.351 | -4.793 | -0.399 | 2.377 | 2.776 |
| 0.700 | 0.821 | -5.645 | 0.144  | 2.798 | 2.654 |
| 0.358 | 0.552 | -5.316 | 0.342  | 1.964 | 1.622 |
| 0.109 | 0.288 | -4.502 | -0.506 | 2.995 | 3.502 |
| 0.051 | 0.208 | -3.923 | -0.535 | 5.020 | 5.555 |
| 0.025 | 0.175 | -3.356 | 0.676  | 6.503 | 5.827 |
| 0.107 | 0.285 | -4.490 | 0.448  | 5.143 | 4.696 |
| 0.868 | 0.928 | -5.702 | -0.063 | 3.933 | 3.996 |
| 0.109 | 0.288 | -4.506 | 0.434  | 4.904 | 4.470 |
| 0.867 | 0.928 | -5.701 | -0.046 | 2.193 | 2.239 |
| 0.715 | 0.831 | -5.652 | -0.075 | 7.333 | 7.408 |
| 0.130 | 0.312 | -4.635 | -0.363 | 5.090 | 5.452 |
| 0.240 | 0.437 | -5.061 | -0.350 | 2.587 | 2.937 |
| 0.113 | 0.292 | -4.534 | -0.437 | 2.580 | 3.017 |
| 0.044 | 0.201 | -3.819 | -0.606 | 3.321 | 3.927 |
| 0.231 | 0.428 | -5.038 | -0.415 | 3.653 | 4.068 |
| 0.035 | 0.187 | -3.635 | -0.556 | 4.046 | 4.602 |
| 0.822 | 0.899 | -5.691 | -0.071 | 1.507 | 1.578 |
| 0.114 | 0.293 | -4.540 | -0.436 | 3.726 | 4.162 |
| 0.825 | 0.901 | -5.692 | -0.050 | 1.758 | 1.808 |
| 0.008 | 0.157 | -2.396 | 1.354  | 4.246 | 2.893 |
| 0.524 | 0.689 | -5.523 | -0.204 | 6.011 | 6.216 |
| 0.291 | 0.489 | -5.187 | -0.223 | 2.717 | 2.940 |
| 0.205 | 0.400 | -4.955 | -0.356 | 3.983 | 4.339 |
| 0.068 | 0.234 | -4.149 | -0.609 | 6.236 | 6.844 |
| 0.400 | 0.587 | -5.379 | -0.214 | 4.511 | 4.725 |
| 0.268 | 0.467 | -5.136 | -0.413 | 3.645 | 4.058 |

|       |       |        |        |       |       |
|-------|-------|--------|--------|-------|-------|
| 0.630 | 0.771 | -5.605 | -0.133 | 4.202 | 4.335 |
| 0.802 | 0.889 | -5.685 | 0.070  | 3.115 | 3.045 |
| 0.383 | 0.572 | -5.355 | -0.261 | 1.585 | 1.846 |
| 0.449 | 0.630 | -5.443 | 0.279  | 2.926 | 2.647 |
| 0.083 | 0.255 | -4.302 | 0.576  | 4.832 | 4.255 |
| 0.453 | 0.634 | -5.448 | -0.348 | 2.167 | 2.515 |
| 0.258 | 0.456 | -5.111 | 0.305  | 3.499 | 3.193 |
| 0.409 | 0.596 | -5.392 | -0.228 | 6.673 | 6.901 |
| 0.001 | 0.157 | -0.593 | 1.187  | 2.771 | 1.584 |
| 0.090 | 0.265 | -4.365 | 0.822  | 4.808 | 3.986 |
| 0.940 | 0.967 | -5.712 | -0.018 | 1.893 | 1.912 |
| 0.921 | 0.958 | -5.710 | -0.027 | 1.992 | 2.019 |
| 0.488 | 0.663 | -5.487 | -0.337 | 2.683 | 3.020 |
| 0.843 | 0.913 | -5.696 | -0.071 | 1.967 | 2.038 |
| 1.000 | 1.000 | -5.715 | 0.000  | 2.548 | 2.547 |
| 0.893 | 0.941 | -5.706 | 0.030  | 1.917 | 1.887 |
| 0.212 | 0.408 | -4.981 | 0.421  | 4.465 | 4.044 |
| 0.297 | 0.493 | -5.200 | 0.409  | 4.395 | 3.987 |
| 0.156 | 0.344 | -4.766 | -0.395 | 3.309 | 3.703 |
| 0.359 | 0.552 | -5.316 | -0.258 | 3.837 | 4.095 |
| 0.763 | 0.864 | -5.672 | 0.106  | 5.318 | 5.212 |
| 0.099 | 0.276 | -4.435 | -0.344 | 4.866 | 5.210 |
| 0.120 | 0.300 | -4.576 | -0.491 | 2.172 | 2.664 |
| 0.056 | 0.217 | -3.998 | 0.686  | 6.222 | 5.536 |
| 0.071 | 0.239 | -4.184 | 0.440  | 7.145 | 6.705 |
| 0.293 | 0.491 | -5.192 | -0.238 | 5.625 | 5.863 |
| 0.447 | 0.629 | -5.441 | -0.178 | 3.024 | 3.202 |
| 0.178 | 0.368 | -4.857 | 1.150  | 9.886 | 8.737 |
| 0.056 | 0.217 | -3.998 | -0.512 | 5.152 | 5.664 |
| 0.930 | 0.962 | -5.711 | -0.020 | 2.406 | 2.426 |
| 0.088 | 0.262 | -4.346 | 0.592  | 2.670 | 2.078 |
| 0.255 | 0.453 | -5.104 | -0.319 | 4.080 | 4.399 |
| 0.896 | 0.943 | -5.707 | -0.029 | 6.395 | 6.424 |
| 0.276 | 0.474 | -5.154 | -0.268 | 4.014 | 4.282 |
| 0.074 | 0.241 | -4.210 | 0.474  | 7.866 | 7.392 |
| 0.024 | 0.173 | -3.324 | 0.577  | 4.621 | 4.044 |
| 0.279 | 0.477 | -5.162 | 0.215  | 7.174 | 6.959 |
| 0.035 | 0.186 | -3.620 | -0.660 | 5.103 | 5.763 |
| 0.365 | 0.556 | -5.326 | 0.244  | 5.017 | 4.774 |
| 0.562 | 0.721 | -5.556 | 0.155  | 7.795 | 7.640 |
| 0.852 | 0.920 | -5.698 | 0.044  | 2.992 | 2.948 |
| 0.257 | 0.455 | -5.107 | -0.235 | 5.486 | 5.721 |
| 0.602 | 0.751 | -5.586 | 0.126  | 2.125 | 2.000 |
| 0.718 | 0.834 | -5.653 | 0.100  | 7.157 | 7.057 |
| 0.169 | 0.360 | -4.824 | 0.363  | 6.357 | 5.994 |
| 0.831 | 0.905 | -5.693 | 0.061  | 3.112 | 3.051 |
| 0.901 | 0.946 | -5.707 | -0.053 | 2.547 | 2.599 |
| 0.322 | 0.519 | -5.251 | 0.251  | 4.757 | 4.506 |
| 0.110 | 0.289 | -4.513 | -0.338 | 5.042 | 5.380 |
| 0.167 | 0.356 | -4.812 | 0.274  | 6.985 | 6.711 |

|       |       |        |        |       |       |
|-------|-------|--------|--------|-------|-------|
| 0.019 | 0.165 | -3.152 | -1.086 | 3.688 | 4.774 |
| 0.014 | 0.160 | -2.896 | 1.397  | 7.109 | 5.712 |
| 0.682 | 0.809 | -5.635 | 0.084  | 5.761 | 5.677 |
| 0.017 | 0.162 | -3.074 | -0.594 | 6.020 | 6.614 |
| 0.532 | 0.695 | -5.530 | -0.141 | 4.094 | 4.235 |
| 0.223 | 0.419 | -5.012 | 0.277  | 7.591 | 7.314 |
| 0.620 | 0.764 | -5.599 | 0.207  | 4.072 | 3.865 |
| 0.973 | 0.987 | -5.714 | -0.014 | 5.079 | 5.093 |
| 0.722 | 0.836 | -5.655 | 0.087  | 6.578 | 6.491 |
| 0.986 | 0.993 | -5.715 | 0.006  | 6.128 | 6.123 |
| 0.015 | 0.160 | -2.942 | 0.831  | 4.973 | 4.142 |
| 0.015 | 0.160 | -2.947 | 0.845  | 4.198 | 3.353 |
| 0.040 | 0.194 | -3.740 | 0.581  | 4.373 | 3.792 |
| 0.178 | 0.368 | -4.858 | 0.515  | 2.863 | 2.347 |
| 0.307 | 0.504 | -5.222 | -0.290 | 4.751 | 5.041 |
| 0.472 | 0.650 | -5.470 | 0.285  | 3.099 | 2.814 |
| 0.598 | 0.747 | -5.583 | -0.145 | 8.744 | 8.889 |
| 0.604 | 0.752 | -5.587 | 0.151  | 3.346 | 3.195 |
| 0.648 | 0.784 | -5.616 | -0.124 | 8.212 | 8.336 |
| 0.651 | 0.787 | -5.618 | 0.141  | 3.621 | 3.480 |
| 0.656 | 0.791 | -5.621 | 0.130  | 7.507 | 7.377 |
| 0.662 | 0.795 | -5.624 | -0.120 | 9.351 | 9.471 |
| 0.735 | 0.846 | -5.661 | -0.090 | 5.950 | 6.040 |
| 0.744 | 0.851 | -5.664 | -0.087 | 8.848 | 8.935 |
| 0.757 | 0.859 | -5.669 | -0.085 | 7.482 | 7.568 |
| 0.797 | 0.886 | -5.683 | -0.083 | 5.715 | 5.798 |
| 0.832 | 0.906 | -5.693 | 0.061  | 7.542 | 7.481 |
| 0.852 | 0.920 | -5.698 | 0.053  | 8.600 | 8.547 |
| 0.882 | 0.936 | -5.704 | 0.039  | 7.327 | 7.287 |
| 0.902 | 0.947 | -5.708 | -0.030 | 6.567 | 6.597 |
| 0.989 | 0.994 | -5.715 | -0.004 | 7.720 | 7.723 |
| 0.268 | 0.466 | -5.135 | -0.363 | 5.404 | 5.767 |
| 0.319 | 0.517 | -5.245 | 0.255  | 5.623 | 5.368 |
| 0.405 | 0.593 | -5.387 | 0.202  | 4.291 | 4.089 |
| 0.040 | 0.194 | -3.733 | -0.627 | 6.898 | 7.526 |
| 0.914 | 0.954 | -5.709 | -0.032 | 2.504 | 2.537 |
| 0.066 | 0.230 | -4.122 | 0.491  | 7.980 | 7.489 |
| 0.010 | 0.157 | -2.644 | 0.993  | 6.158 | 5.165 |
| 0.040 | 0.194 | -3.739 | 1.030  | 5.636 | 4.606 |
| 0.050 | 0.208 | -3.913 | 0.608  | 4.538 | 3.930 |
| 0.897 | 0.943 | -5.707 | 0.027  | 4.418 | 4.390 |
| 0.468 | 0.647 | -5.465 | -0.176 | 3.657 | 3.833 |
| 0.845 | 0.915 | -5.697 | -0.062 | 4.967 | 5.029 |
| 0.090 | 0.264 | -4.360 | -0.490 | 3.073 | 3.563 |
| 0.094 | 0.271 | -4.398 | 0.388  | 7.119 | 6.731 |
| 0.462 | 0.643 | -5.459 | 0.223  | 3.402 | 3.179 |
| 0.141 | 0.324 | -4.691 | -0.444 | 5.786 | 6.230 |
| 0.159 | 0.348 | -4.781 | -0.333 | 2.721 | 3.055 |
| 0.353 | 0.548 | -5.307 | -0.335 | 4.336 | 4.672 |
| 0.138 | 0.322 | -4.678 | -0.373 | 5.017 | 5.390 |

|       |       |        |        |       |       |
|-------|-------|--------|--------|-------|-------|
| 0.498 | 0.670 | -5.498 | -0.198 | 2.528 | 2.726 |
| 0.163 | 0.352 | -4.797 | 0.330  | 5.482 | 5.152 |
| 0.149 | 0.335 | -4.734 | 0.401  | 3.936 | 3.535 |
| 0.692 | 0.816 | -5.640 | -0.111 | 7.174 | 7.285 |
| 0.162 | 0.351 | -4.794 | -0.478 | 1.613 | 2.091 |
| 0.320 | 0.517 | -5.246 | -0.254 | 1.537 | 1.792 |
| 0.145 | 0.329 | -4.713 | -0.444 | 2.921 | 3.365 |
| 0.776 | 0.871 | -5.676 | -0.079 | 2.590 | 2.669 |
| 0.447 | 0.629 | -5.442 | 0.141  | 4.380 | 4.239 |
| 0.228 | 0.425 | -5.028 | 0.268  | 5.923 | 5.655 |
| 0.877 | 0.933 | -5.703 | -0.059 | 2.318 | 2.377 |
| 0.024 | 0.173 | -3.332 | 0.583  | 3.418 | 2.835 |
| 0.005 | 0.157 | -1.998 | 1.071  | 3.608 | 2.537 |
| 0.955 | 0.977 | -5.713 | 0.020  | 3.310 | 3.290 |
| 0.011 | 0.157 | -2.681 | -0.636 | 6.511 | 7.148 |
| 0.587 | 0.740 | -5.575 | 0.124  | 4.535 | 4.412 |
| 0.061 | 0.224 | -4.070 | 0.454  | 8.314 | 7.859 |
| 0.033 | 0.184 | -3.587 | -0.581 | 2.427 | 3.008 |
| 0.076 | 0.245 | -4.231 | -0.717 | 3.630 | 4.347 |
| 0.804 | 0.890 | -5.686 | 0.068  | 1.876 | 1.808 |
| 0.010 | 0.157 | -2.656 | -1.383 | 4.469 | 5.852 |
| 0.112 | 0.291 | -4.526 | 0.456  | 5.401 | 4.945 |
| 0.382 | 0.571 | -5.354 | 0.266  | 2.765 | 2.499 |
| 0.893 | 0.941 | -5.706 | -0.034 | 3.672 | 3.706 |
| 0.429 | 0.615 | -5.419 | -0.164 | 4.427 | 4.591 |
| 0.025 | 0.175 | -3.369 | 0.829  | 4.608 | 3.778 |
| 0.182 | 0.373 | -4.873 | 0.444  | 5.612 | 5.169 |
| 0.136 | 0.319 | -4.665 | -0.633 | 2.815 | 3.448 |
| 0.194 | 0.387 | -4.917 | -0.432 | 4.170 | 4.602 |
| 0.029 | 0.178 | -3.489 | -0.442 | 8.365 | 8.807 |
| 0.376 | 0.566 | -5.344 | -0.414 | 3.956 | 4.370 |
| 0.377 | 0.567 | -5.346 | -0.206 | 3.928 | 4.134 |
| 0.302 | 0.500 | -5.212 | -0.343 | 2.808 | 3.151 |
| 0.172 | 0.362 | -4.835 | -0.361 | 1.894 | 2.255 |
| 0.859 | 0.925 | -5.700 | 0.064  | 3.257 | 3.193 |
| 0.557 | 0.716 | -5.551 | 0.171  | 4.062 | 3.891 |
| 0.371 | 0.562 | -5.337 | -0.307 | 5.918 | 6.224 |
| 0.084 | 0.256 | -4.313 | -0.448 | 4.626 | 5.074 |
| 0.021 | 0.168 | -3.212 | -0.693 | 7.324 | 8.016 |
| 0.435 | 0.618 | -5.426 | -0.324 | 4.116 | 4.440 |
| 0.049 | 0.207 | -3.892 | 0.916  | 3.579 | 2.663 |
| 0.232 | 0.428 | -5.039 | 0.327  | 6.504 | 6.177 |
| 0.008 | 0.157 | -2.412 | 1.517  | 4.959 | 3.442 |
| 0.036 | 0.188 | -3.650 | -0.615 | 7.090 | 7.705 |
| 0.172 | 0.362 | -4.835 | -0.520 | 2.771 | 3.291 |
| 0.056 | 0.218 | -4.005 | 0.602  | 5.519 | 4.917 |
| 0.006 | 0.157 | -2.159 | 1.631  | 8.214 | 6.582 |
| 0.044 | 0.200 | -3.809 | 0.840  | 3.128 | 2.288 |
| 0.261 | 0.459 | -5.118 | 0.233  | 7.175 | 6.941 |
| 0.532 | 0.696 | -5.530 | 0.177  | 3.735 | 3.558 |

|       |       |        |        |       |       |
|-------|-------|--------|--------|-------|-------|
| 0.188 | 0.380 | -4.896 | -0.349 | 2.053 | 2.402 |
| 0.904 | 0.948 | -5.708 | 0.038  | 2.515 | 2.477 |
| 0.936 | 0.966 | -5.712 | 0.019  | 4.231 | 4.212 |
| 0.212 | 0.408 | -4.980 | 0.295  | 8.149 | 7.855 |
| 0.010 | 0.157 | -2.599 | -0.906 | 3.426 | 4.331 |
| 0.971 | 0.985 | -5.714 | 0.010  | 3.884 | 3.874 |
| 0.679 | 0.808 | -5.634 | 0.156  | 3.599 | 3.444 |
| 0.020 | 0.167 | -3.175 | 0.993  | 6.627 | 5.634 |
| 0.006 | 0.157 | -2.180 | -0.848 | 6.462 | 7.310 |
| 0.079 | 0.249 | -4.265 | 0.429  | 4.278 | 3.849 |
| 0.066 | 0.231 | -4.129 | 0.583  | 3.357 | 2.774 |
| 0.034 | 0.184 | -3.602 | 0.804  | 5.767 | 4.963 |
| 0.793 | 0.883 | -5.682 | -0.069 | 1.861 | 1.929 |
| 0.031 | 0.181 | -3.537 | 1.256  | 7.177 | 5.920 |
| 0.035 | 0.186 | -3.622 | 0.942  | 5.754 | 4.812 |
| 0.328 | 0.524 | -5.263 | -0.280 | 5.123 | 5.402 |
| 0.873 | 0.931 | -5.703 | 0.048  | 7.030 | 6.983 |
| 0.026 | 0.175 | -3.383 | -0.686 | 4.329 | 5.015 |
| 0.461 | 0.642 | -5.458 | -0.181 | 6.959 | 7.140 |
| 0.004 | 0.157 | -1.914 | 1.232  | 6.864 | 5.632 |
| 0.032 | 0.182 | -3.560 | -0.639 | 4.545 | 5.184 |
| 0.128 | 0.309 | -4.621 | 0.376  | 5.260 | 4.884 |
| 0.943 | 0.970 | -5.712 | 0.019  | 3.267 | 3.247 |
| 0.049 | 0.207 | -3.898 | -0.962 | 2.580 | 3.543 |
| 0.008 | 0.157 | -2.472 | 0.653  | 6.195 | 5.542 |
| 0.152 | 0.339 | -4.747 | 0.526  | 2.750 | 2.223 |
| 0.560 | 0.719 | -5.554 | -0.189 | 4.009 | 4.197 |
| 0.015 | 0.160 | -2.924 | 0.771  | 3.125 | 2.354 |
| 0.937 | 0.966 | -5.712 | -0.016 | 5.140 | 5.156 |
| 0.573 | 0.728 | -5.564 | 0.132  | 6.107 | 5.975 |
| 0.219 | 0.414 | -5.001 | 0.340  | 5.021 | 4.681 |
| 0.080 | 0.250 | -4.271 | 0.530  | 3.879 | 3.349 |
| 0.054 | 0.214 | -3.966 | 1.166  | 6.395 | 5.229 |
| 0.070 | 0.236 | -4.167 | 0.854  | 8.174 | 7.320 |
| 0.321 | 0.518 | -5.250 | 0.378  | 5.696 | 5.318 |
| 0.078 | 0.247 | -4.251 | 1.018  | 6.032 | 5.014 |
| 0.361 | 0.553 | -5.320 | 0.352  | 3.136 | 2.784 |
| 0.214 | 0.409 | -4.987 | 0.368  | 6.599 | 6.231 |
| 0.004 | 0.157 | -1.920 | 0.919  | 5.777 | 4.859 |
| 0.020 | 0.166 | -3.163 | 0.942  | 4.868 | 3.926 |
| 0.027 | 0.177 | -3.438 | 0.825  | 5.210 | 4.385 |
| 0.010 | 0.157 | -2.610 | 1.376  | 7.240 | 5.864 |
| 0.141 | 0.324 | -4.691 | 0.826  | 5.221 | 4.395 |
| 0.039 | 0.193 | -3.721 | 1.128  | 5.692 | 4.563 |
| 0.022 | 0.171 | -3.271 | 1.843  | 7.948 | 6.105 |
| 0.387 | 0.575 | -5.361 | 0.312  | 4.664 | 4.352 |
| 0.393 | 0.581 | -5.370 | -0.288 | 3.203 | 3.492 |
| 0.475 | 0.653 | -5.473 | 0.245  | 7.604 | 7.359 |
| 0.024 | 0.173 | -3.335 | 0.818  | 7.893 | 7.075 |
| 0.509 | 0.677 | -5.508 | 0.216  | 2.870 | 2.653 |



|       |       |        |        |       |       |
|-------|-------|--------|--------|-------|-------|
| 0.323 | 0.520 | -5.254 | -0.248 | 2.280 | 2.528 |
| 0.674 | 0.804 | -5.631 | -0.181 | 3.715 | 3.896 |
| 0.035 | 0.186 | -3.629 | 0.924  | 5.228 | 4.304 |
| 0.901 | 0.946 | -5.707 | 0.040  | 2.916 | 2.876 |
| 0.013 | 0.160 | -2.805 | 1.267  | 4.745 | 3.479 |
| 0.042 | 0.197 | -3.773 | 1.092  | 8.209 | 7.117 |
| 0.029 | 0.178 | -3.482 | 0.747  | 4.405 | 3.658 |
| 0.459 | 0.639 | -5.455 | 0.227  | 3.665 | 3.437 |
| 0.005 | 0.157 | -2.051 | 1.915  | 6.644 | 4.729 |
| 0.003 | 0.157 | -1.734 | 1.085  | 3.658 | 2.573 |
| 0.014 | 0.160 | -2.889 | 1.356  | 6.305 | 4.950 |
| 0.026 | 0.176 | -3.399 | 1.319  | 7.129 | 5.810 |
| 0.133 | 0.316 | -4.650 | -0.716 | 5.562 | 6.278 |
| 0.299 | 0.496 | -5.205 | 0.307  | 5.154 | 4.847 |
| 0.038 | 0.192 | -3.700 | 0.903  | 5.676 | 4.773 |
| 0.186 | 0.378 | -4.889 | 0.480  | 6.518 | 6.038 |
| 0.041 | 0.195 | -3.761 | 1.139  | 6.054 | 4.915 |
| 0.020 | 0.167 | -3.191 | 1.417  | 6.633 | 5.217 |
| 0.013 | 0.160 | -2.837 | -0.858 | 7.469 | 8.327 |
| 0.455 | 0.636 | -5.450 | 0.193  | 3.889 | 3.696 |
| 0.626 | 0.768 | -5.602 | 0.117  | 2.704 | 2.587 |
| 0.540 | 0.702 | -5.537 | -0.321 | 4.646 | 4.967 |
| 0.003 | 0.157 | -1.656 | -0.959 | 5.733 | 6.692 |
| 0.034 | 0.185 | -3.606 | -0.832 | 3.930 | 4.762 |
| 0.020 | 0.167 | -3.185 | 1.124  | 7.817 | 6.693 |
| 0.010 | 0.157 | -2.599 | 1.602  | 6.220 | 4.618 |
| 0.475 | 0.653 | -5.474 | 0.197  | 2.855 | 2.658 |
| 0.046 | 0.203 | -3.850 | 1.460  | 6.741 | 5.281 |
| 0.075 | 0.244 | -4.223 | 0.522  | 3.343 | 2.821 |
| 0.026 | 0.175 | -3.386 | 0.701  | 7.253 | 6.553 |
| 0.335 | 0.531 | -5.275 | 0.259  | 4.134 | 3.875 |
| 0.894 | 0.942 | -5.706 | 0.039  | 3.261 | 3.222 |
| 0.247 | 0.445 | -5.083 | -0.305 | 1.702 | 2.006 |
| 0.012 | 0.160 | -2.786 | 0.657  | 3.156 | 2.500 |
| 0.034 | 0.184 | -3.596 | 0.653  | 4.360 | 3.707 |
| 0.710 | 0.828 | -5.649 | 0.153  | 5.234 | 5.081 |
| 0.265 | 0.463 | -5.127 | 0.290  | 3.485 | 3.195 |
| 0.050 | 0.208 | -3.913 | -0.505 | 2.988 | 3.492 |
| 0.126 | 0.307 | -4.611 | 0.569  | 4.437 | 3.868 |
| 0.010 | 0.157 | -2.600 | 1.023  | 7.388 | 6.365 |
| 0.238 | 0.435 | -5.056 | -0.319 | 2.888 | 3.207 |
| 0.362 | 0.554 | -5.322 | 0.220  | 4.120 | 3.900 |
| 0.740 | 0.849 | -5.663 | -0.120 | 6.783 | 6.903 |
| 0.012 | 0.160 | -2.751 | 1.228  | 6.369 | 5.142 |
| 0.076 | 0.245 | -4.238 | -0.606 | 6.100 | 6.706 |
| 0.159 | 0.348 | -4.781 | 0.374  | 3.412 | 3.038 |
| 0.703 | 0.823 | -5.646 | 0.099  | 3.024 | 2.925 |
| 0.668 | 0.800 | -5.628 | -0.140 | 2.484 | 2.624 |
| 0.069 | 0.236 | -4.164 | -0.826 | 3.125 | 3.951 |
| 0.029 | 0.178 | -3.475 | 1.002  | 6.041 | 5.038 |

|       |       |        |        |       |       |
|-------|-------|--------|--------|-------|-------|
| 0.035 | 0.186 | -3.620 | 1.344  | 5.810 | 4.467 |
| 0.008 | 0.157 | -2.463 | 1.178  | 7.860 | 6.682 |
| 0.004 | 0.157 | -1.791 | 1.886  | 6.489 | 4.603 |
| 0.026 | 0.175 | -3.385 | 1.083  | 4.345 | 3.262 |
| 0.008 | 0.157 | -2.436 | 1.705  | 5.902 | 4.197 |
| 0.013 | 0.160 | -2.850 | 1.484  | 5.878 | 4.395 |
| 0.021 | 0.168 | -3.212 | 1.299  | 6.349 | 5.050 |
| 0.010 | 0.157 | -2.658 | 1.034  | 5.659 | 4.624 |
| 0.005 | 0.157 | -2.130 | 2.217  | 6.180 | 3.963 |
| 0.021 | 0.168 | -3.221 | 0.799  | 6.264 | 5.466 |
| 0.042 | 0.196 | -3.767 | -0.488 | 3.725 | 4.213 |
| 0.088 | 0.261 | -4.342 | -0.402 | 6.526 | 6.928 |
| 0.015 | 0.160 | -2.943 | 1.479  | 6.949 | 5.470 |
| 0.306 | 0.504 | -5.220 | -0.237 | 7.092 | 7.329 |
| 0.868 | 0.928 | -5.702 | 0.044  | 4.344 | 4.300 |
| 0.712 | 0.828 | -5.650 | -0.107 | 4.278 | 4.385 |
| 0.731 | 0.843 | -5.659 | -0.386 | 4.687 | 5.072 |
| 0.086 | 0.258 | -4.324 | -0.500 | 5.326 | 5.826 |
| 0.403 | 0.590 | -5.383 | 0.352  | 5.084 | 4.731 |
| 0.006 | 0.157 | -2.245 | -1.130 | 3.517 | 4.647 |
| 0.080 | 0.251 | -4.275 | 1.196  | 5.578 | 4.382 |
| 0.142 | 0.326 | -4.699 | 0.555  | 5.784 | 5.229 |
| 0.015 | 0.161 | -2.965 | 1.063  | 7.088 | 6.025 |
| 0.038 | 0.192 | -3.691 | 0.716  | 6.764 | 6.048 |
| 0.050 | 0.208 | -3.909 | -0.472 | 4.264 | 4.736 |
| 0.311 | 0.508 | -5.229 | 0.358  | 4.185 | 3.827 |
| 0.011 | 0.157 | -2.688 | -0.600 | 3.775 | 4.375 |
| 0.709 | 0.827 | -5.649 | -0.086 | 4.678 | 4.765 |
| 0.021 | 0.169 | -3.238 | 1.102  | 6.174 | 5.072 |
| 0.049 | 0.207 | -3.902 | -0.513 | 6.294 | 6.807 |
| 0.595 | 0.746 | -5.581 | 0.102  | 8.207 | 8.105 |
| 0.036 | 0.188 | -3.644 | 0.884  | 8.618 | 7.735 |
| 0.350 | 0.545 | -5.302 | 0.236  | 6.373 | 6.136 |
| 0.008 | 0.157 | -2.477 | -0.764 | 3.733 | 4.497 |
| 0.088 | 0.262 | -4.344 | 0.545  | 5.903 | 5.358 |
| 0.131 | 0.313 | -4.639 | 0.398  | 4.357 | 3.959 |
| 0.311 | 0.508 | -5.230 | -0.276 | 4.012 | 4.288 |
| 0.478 | 0.655 | -5.476 | -0.231 | 4.370 | 4.601 |
| 0.030 | 0.179 | -3.505 | 1.293  | 7.827 | 6.534 |
| 0.012 | 0.160 | -2.754 | 0.716  | 9.059 | 8.343 |
| 0.499 | 0.670 | -5.498 | -0.204 | 5.880 | 6.084 |
| 0.009 | 0.157 | -2.538 | 1.763  | 6.420 | 4.657 |
| 0.107 | 0.285 | -4.490 | 0.594  | 5.643 | 5.049 |
| 0.556 | 0.716 | -5.550 | 0.128  | 8.268 | 8.140 |
| 0.058 | 0.219 | -4.023 | 0.754  | 6.404 | 5.649 |
| 0.010 | 0.157 | -2.581 | -0.817 | 6.608 | 7.425 |
| 0.124 | 0.305 | -4.602 | 0.500  | 7.358 | 6.858 |
| 0.887 | 0.938 | -5.705 | -0.037 | 4.266 | 4.303 |
| 0.037 | 0.190 | -3.669 | 0.550  | 4.673 | 4.123 |
| 0.074 | 0.241 | -4.210 | 0.534  | 5.897 | 5.363 |

|       |       |        |        |        |       |
|-------|-------|--------|--------|--------|-------|
| 0.031 | 0.181 | -3.529 | 0.755  | 7.356  | 6.601 |
| 0.599 | 0.749 | -5.584 | 0.096  | 7.064  | 6.968 |
| 0.138 | 0.322 | -4.677 | 0.422  | 3.283  | 2.861 |
| 0.029 | 0.178 | -3.476 | 0.702  | 3.618  | 2.916 |
| 0.245 | 0.442 | -5.075 | 0.401  | 6.216  | 5.815 |
| 0.019 | 0.164 | -3.144 | 1.527  | 8.233  | 6.706 |
| 0.082 | 0.254 | -4.293 | 0.436  | 7.067  | 6.631 |
| 0.042 | 0.198 | -3.782 | -0.593 | 7.666  | 8.259 |
| 0.212 | 0.407 | -4.978 | -0.348 | 3.110  | 3.458 |
| 0.045 | 0.201 | -3.826 | 0.948  | 5.846  | 4.899 |
| 0.068 | 0.235 | -4.154 | 0.459  | 4.924  | 4.465 |
| 0.037 | 0.190 | -3.671 | 0.555  | 2.478  | 1.923 |
| 0.014 | 0.160 | -2.900 | -1.016 | 3.715  | 4.731 |
| 0.007 | 0.157 | -2.379 | 0.740  | 4.595  | 3.855 |
| 0.001 | 0.157 | -0.841 | -0.962 | 5.292  | 6.254 |
| 0.033 | 0.184 | -3.594 | 1.095  | 6.758  | 5.664 |
| 0.005 | 0.157 | -1.993 | -1.044 | 6.163  | 7.207 |
| 0.106 | 0.285 | -4.487 | 0.520  | 3.678  | 3.159 |
| 0.166 | 0.356 | -4.811 | -0.497 | 3.418  | 3.915 |
| 0.018 | 0.163 | -3.102 | -0.775 | 6.895  | 7.670 |
| 0.257 | 0.455 | -5.108 | 0.284  | 8.122  | 7.837 |
| 0.300 | 0.498 | -5.208 | 0.320  | 5.981  | 5.661 |
| 0.072 | 0.239 | -4.187 | 0.491  | 8.834  | 8.343 |
| 0.082 | 0.254 | -4.292 | 0.427  | 7.762  | 7.335 |
| 0.050 | 0.208 | -3.915 | 0.734  | 7.958  | 7.223 |
| 0.568 | 0.724 | -5.561 | -0.166 | 3.122  | 3.287 |
| 0.007 | 0.157 | -2.379 | 0.740  | 3.545  | 2.804 |
| 0.017 | 0.162 | -3.052 | 1.085  | 11.027 | 9.942 |
| 0.070 | 0.236 | -4.166 | -0.391 | 8.655  | 9.046 |
| 0.275 | 0.473 | -5.151 | 0.207  | 9.416  | 9.209 |
| 0.188 | 0.380 | -4.895 | -0.446 | 3.558  | 4.004 |
| 0.044 | 0.200 | -3.805 | 0.523  | 9.346  | 8.823 |
| 0.066 | 0.230 | -4.124 | 0.657  | 4.802  | 4.146 |
| 0.993 | 0.996 | -5.715 | 0.002  | 1.999  | 1.996 |
| 0.493 | 0.667 | -5.493 | -0.192 | 5.747  | 5.939 |
| 0.182 | 0.374 | -4.876 | 0.409  | 6.920  | 6.511 |
| 0.010 | 0.157 | -2.636 | 1.135  | 7.036  | 5.901 |
| 0.842 | 0.912 | -5.696 | 0.055  | 2.598  | 2.543 |
| 0.098 | 0.274 | -4.425 | -0.499 | 2.854  | 3.353 |
| 0.124 | 0.305 | -4.600 | 0.465  | 6.615  | 6.151 |
| 0.267 | 0.465 | -5.132 | 0.274  | 5.229  | 4.955 |
| 0.029 | 0.178 | -3.470 | 0.507  | 7.254  | 6.747 |
| 0.024 | 0.173 | -3.328 | -0.759 | 3.860  | 4.619 |
| 0.914 | 0.954 | -5.709 | -0.046 | 5.048  | 5.094 |
| 0.023 | 0.173 | -3.311 | -0.550 | 5.332  | 5.882 |
| 0.778 | 0.872 | -5.677 | -0.091 | 2.718  | 2.810 |
| 0.590 | 0.743 | -5.577 | -0.112 | 6.457  | 6.569 |
| 0.164 | 0.353 | -4.799 | -0.500 | 4.556  | 5.056 |
| 0.011 | 0.157 | -2.663 | 0.820  | 4.049  | 3.229 |
| 0.445 | 0.627 | -5.438 | 0.212  | 7.053  | 6.840 |

|       |       |        |        |       |       |
|-------|-------|--------|--------|-------|-------|
| 0.016 | 0.162 | -3.023 | 0.660  | 8.607 | 7.947 |
| 0.889 | 0.939 | -5.705 | 0.044  | 3.407 | 3.364 |
| 0.018 | 0.164 | -3.119 | 0.736  | 5.279 | 4.543 |
| 0.871 | 0.930 | -5.702 | 0.086  | 3.604 | 3.517 |
| 0.103 | 0.281 | -4.463 | 0.359  | 6.753 | 6.394 |
| 0.347 | 0.542 | -5.297 | -0.246 | 2.837 | 3.082 |
| 0.171 | 0.361 | -4.829 | 0.317  | 5.574 | 5.257 |
| 0.191 | 0.383 | -4.907 | 0.310  | 5.826 | 5.516 |
| 0.744 | 0.851 | -5.664 | 0.070  | 7.692 | 7.622 |
| 0.013 | 0.160 | -2.856 | 0.950  | 5.259 | 4.309 |
| 0.060 | 0.221 | -4.049 | -0.605 | 5.966 | 6.571 |
| 0.902 | 0.947 | -5.708 | -0.023 | 5.153 | 5.175 |
| 0.024 | 0.173 | -3.314 | 0.846  | 4.584 | 3.738 |
| 0.685 | 0.811 | -5.637 | -0.163 | 3.135 | 3.298 |
| 0.044 | 0.201 | -3.818 | 0.541  | 3.228 | 2.687 |
| 0.828 | 0.903 | -5.692 | 0.063  | 3.536 | 3.473 |
| 0.012 | 0.160 | -2.772 | -1.539 | 7.037 | 8.576 |
| 0.003 | 0.157 | -1.713 | 1.506  | 6.535 | 5.028 |
| 0.061 | 0.223 | -4.063 | -0.535 | 2.663 | 3.198 |
| 0.715 | 0.831 | -5.652 | -0.137 | 2.568 | 2.705 |
| 0.181 | 0.373 | -4.872 | 0.462  | 5.503 | 5.040 |
| 0.155 | 0.342 | -4.759 | 0.558  | 2.514 | 1.956 |
| 0.600 | 0.749 | -5.584 | 0.121  | 4.473 | 4.352 |
| 0.024 | 0.173 | -3.331 | 0.533  | 7.418 | 6.884 |
| 0.088 | 0.261 | -4.341 | 0.371  | 6.701 | 6.330 |
| 0.011 | 0.158 | -2.708 | 0.587  | 5.812 | 5.225 |
| 0.169 | 0.360 | -4.824 | 0.272  | 6.488 | 6.217 |
| 0.906 | 0.949 | -5.708 | -0.037 | 2.092 | 2.128 |
| 0.105 | 0.283 | -4.476 | 0.460  | 4.227 | 3.767 |
| 0.449 | 0.631 | -5.444 | 0.260  | 2.361 | 2.101 |
| 0.761 | 0.862 | -5.671 | 0.107  | 3.316 | 3.209 |
| 0.033 | 0.184 | -3.587 | 1.235  | 6.964 | 5.729 |
| 0.286 | 0.484 | -5.178 | 0.341  | 1.961 | 1.620 |
| 0.203 | 0.398 | -4.951 | -0.314 | 3.408 | 3.721 |
| 0.464 | 0.644 | -5.461 | -0.222 | 3.078 | 3.301 |
| 0.007 | 0.157 | -2.332 | 0.869  | 4.433 | 3.564 |
| 0.490 | 0.664 | -5.489 | 0.181  | 2.482 | 2.301 |
| 0.004 | 0.157 | -1.909 | -0.593 | 3.217 | 3.809 |
| 0.133 | 0.316 | -4.652 | 0.551  | 6.652 | 6.100 |
| 0.728 | 0.840 | -5.657 | -0.115 | 2.221 | 2.336 |
| 0.054 | 0.215 | -3.976 | 1.170  | 7.062 | 5.892 |
| 0.174 | 0.364 | -4.843 | 0.336  | 3.877 | 3.541 |
| 0.392 | 0.580 | -5.368 | -0.185 | 5.165 | 5.350 |
| 0.078 | 0.247 | -4.252 | -0.526 | 1.739 | 2.265 |
| 0.042 | 0.197 | -3.771 | -0.851 | 2.139 | 2.990 |
| 0.092 | 0.267 | -4.378 | -0.678 | 5.420 | 6.099 |
| 0.267 | 0.465 | -5.133 | -0.437 | 3.277 | 3.714 |
| 0.369 | 0.559 | -5.333 | -0.227 | 3.744 | 3.971 |
| 0.027 | 0.176 | -3.415 | 1.012  | 4.810 | 3.798 |
| 0.385 | 0.574 | -5.358 | -0.177 | 4.906 | 5.083 |

|       |       |        |        |       |       |
|-------|-------|--------|--------|-------|-------|
| 0.311 | 0.508 | -5.230 | 0.331  | 3.246 | 2.915 |
| 0.118 | 0.298 | -4.566 | 0.368  | 5.493 | 5.125 |
| 0.605 | 0.753 | -5.588 | 0.130  | 2.724 | 2.594 |
| 0.019 | 0.164 | -3.143 | -0.569 | 7.208 | 7.777 |
| 0.076 | 0.245 | -4.234 | -0.471 | 8.196 | 8.667 |
| 0.564 | 0.721 | -5.557 | 0.423  | 7.942 | 7.519 |
| 0.053 | 0.213 | -3.958 | 0.462  | 6.587 | 6.124 |
| 0.811 | 0.894 | -5.688 | 0.051  | 6.903 | 6.852 |
| 0.146 | 0.330 | -4.718 | 0.374  | 3.600 | 3.226 |
| 0.842 | 0.912 | -5.696 | -0.051 | 5.608 | 5.659 |
| 0.511 | 0.679 | -5.510 | -0.324 | 8.099 | 8.423 |
| 0.045 | 0.202 | -3.829 | 0.566  | 6.297 | 5.731 |
| 0.058 | 0.219 | -4.028 | -0.524 | 4.189 | 4.712 |
| 0.146 | 0.330 | -4.719 | -0.350 | 4.534 | 4.884 |
| 0.080 | 0.250 | -4.268 | -0.393 | 4.397 | 4.790 |
| 0.047 | 0.203 | -3.855 | -0.582 | 3.414 | 3.997 |
| 0.939 | 0.967 | -5.712 | 0.021  | 2.163 | 2.142 |
| 0.024 | 0.173 | -3.328 | -0.546 | 4.567 | 5.114 |
| 0.783 | 0.876 | -5.679 | 0.077  | 2.461 | 2.384 |
| 0.896 | 0.943 | -5.707 | 0.051  | 2.898 | 2.846 |
| 0.083 | 0.254 | -4.297 | 0.371  | 5.348 | 4.976 |
| 0.350 | 0.545 | -5.302 | 0.234  | 3.501 | 3.267 |
| 0.124 | 0.305 | -4.602 | -0.565 | 5.428 | 5.993 |
| 0.322 | 0.519 | -5.251 | 0.234  | 6.358 | 6.124 |
| 0.076 | 0.245 | -4.237 | -0.648 | 1.900 | 2.547 |
| 0.003 | 0.157 | -1.667 | 1.434  | 6.467 | 5.033 |
| 0.049 | 0.206 | -3.889 | -1.035 | 3.316 | 4.351 |
| 0.306 | 0.503 | -5.219 | 0.286  | 5.158 | 4.872 |
| 0.672 | 0.802 | -5.630 | 0.138  | 5.770 | 5.633 |
| 0.528 | 0.693 | -5.526 | 0.155  | 2.009 | 1.855 |
| 0.142 | 0.326 | -4.696 | -0.399 | 5.165 | 5.564 |
| 0.246 | 0.443 | -5.079 | -0.326 | 1.807 | 2.133 |
| 0.006 | 0.157 | -2.132 | -1.203 | 3.417 | 4.620 |
| 0.862 | 0.926 | -5.700 | -0.037 | 6.999 | 7.036 |
| 0.023 | 0.173 | -3.312 | -0.632 | 6.291 | 6.924 |
| 0.046 | 0.203 | -3.844 | -0.619 | 3.160 | 3.779 |
| 0.721 | 0.835 | -5.654 | 0.088  | 4.750 | 4.662 |
| 0.133 | 0.316 | -4.652 | -0.376 | 2.908 | 3.285 |
| 0.085 | 0.257 | -4.319 | -0.420 | 5.233 | 5.653 |
| 0.005 | 0.157 | -2.019 | 0.878  | 3.561 | 2.683 |
| 0.024 | 0.173 | -3.317 | -0.924 | 5.362 | 6.287 |
| 0.478 | 0.655 | -5.477 | -0.226 | 4.032 | 4.258 |
| 0.676 | 0.806 | -5.632 | 0.129  | 2.853 | 2.724 |
| 0.041 | 0.195 | -3.758 | 0.618  | 7.547 | 6.929 |
| 0.215 | 0.409 | -4.988 | 0.423  | 8.287 | 7.864 |
| 0.681 | 0.809 | -5.635 | 0.149  | 5.543 | 5.394 |
| 0.281 | 0.479 | -5.165 | 0.296  | 6.540 | 6.244 |
| 0.885 | 0.937 | -5.705 | -0.041 | 5.981 | 6.022 |
| 0.005 | 0.157 | -2.074 | -1.677 | 4.615 | 6.292 |
| 0.496 | 0.668 | -5.495 | -0.296 | 2.728 | 3.024 |

|       |       |        |        |       |       |
|-------|-------|--------|--------|-------|-------|
| 0.024 | 0.174 | -3.344 | 0.564  | 3.893 | 3.329 |
| 0.207 | 0.402 | -4.961 | -0.324 | 3.416 | 3.740 |
| 0.032 | 0.182 | -3.553 | 0.790  | 5.369 | 4.579 |
| 0.140 | 0.324 | -4.689 | 0.479  | 4.202 | 3.723 |
| 0.050 | 0.207 | -3.905 | -0.456 | 5.604 | 6.060 |
| 0.017 | 0.162 | -3.060 | 1.720  | 7.002 | 5.283 |
| 0.269 | 0.468 | -5.138 | -0.335 | 2.416 | 2.751 |
| 0.017 | 0.162 | -3.058 | -0.669 | 2.772 | 3.441 |
| 0.124 | 0.305 | -4.600 | 0.531  | 3.716 | 3.185 |
| 0.824 | 0.900 | -5.691 | 0.048  | 5.249 | 5.200 |
| 0.073 | 0.241 | -4.206 | -0.513 | 6.933 | 7.446 |
| 0.255 | 0.452 | -5.102 | -0.414 | 2.283 | 2.697 |
| 0.122 | 0.304 | -4.590 | -0.501 | 2.410 | 2.912 |
| 0.187 | 0.379 | -4.892 | -0.627 | 2.750 | 3.377 |
| 0.442 | 0.625 | -5.435 | -0.312 | 1.901 | 2.213 |
| 0.199 | 0.394 | -4.938 | -0.446 | 2.035 | 2.482 |
| 0.165 | 0.354 | -4.804 | -0.409 | 3.177 | 3.586 |
| 0.109 | 0.288 | -4.503 | -0.393 | 4.333 | 4.725 |
| 0.047 | 0.204 | -3.868 | -0.705 | 2.220 | 2.925 |
| 0.117 | 0.297 | -4.557 | 0.616  | 6.398 | 5.783 |
| 0.792 | 0.882 | -5.682 | 0.079  | 5.054 | 4.975 |
| 0.384 | 0.572 | -5.356 | -0.225 | 2.462 | 2.687 |
| 0.970 | 0.985 | -5.714 | -0.010 | 3.973 | 3.983 |
| 0.016 | 0.162 | -2.992 | 0.887  | 5.118 | 4.232 |
| 0.041 | 0.195 | -3.755 | -0.722 | 2.802 | 3.524 |
| 0.027 | 0.176 | -3.413 | 0.853  | 5.587 | 4.734 |
| 0.099 | 0.276 | -4.434 | 0.875  | 6.670 | 5.795 |
| 0.098 | 0.275 | -4.429 | 0.401  | 5.898 | 5.497 |
| 0.175 | 0.365 | -4.848 | -0.398 | 3.296 | 3.694 |
| 0.539 | 0.701 | -5.536 | -0.233 | 2.847 | 3.080 |
| 0.049 | 0.207 | -3.896 | 0.579  | 4.541 | 3.962 |
| 0.520 | 0.687 | -5.519 | 0.165  | 3.982 | 3.817 |
| 0.963 | 0.982 | -5.714 | -0.022 | 2.769 | 2.791 |
| 0.610 | 0.756 | -5.592 | 0.163  | 2.181 | 2.018 |
| 0.209 | 0.404 | -4.968 | -0.283 | 3.839 | 4.122 |
| 0.175 | 0.365 | -4.847 | 0.321  | 7.072 | 6.750 |
| 0.698 | 0.820 | -5.644 | 0.110  | 2.744 | 2.634 |
| 0.241 | 0.438 | -5.064 | -0.311 | 2.495 | 2.806 |
| 0.151 | 0.338 | -4.742 | -0.405 | 2.227 | 2.631 |
| 0.108 | 0.287 | -4.499 | -0.575 | 4.299 | 4.874 |
| 0.106 | 0.284 | -4.485 | -0.861 | 1.015 | 1.876 |
| 0.002 | 0.157 | -1.370 | 1.013  | 2.521 | 1.508 |
| 0.719 | 0.834 | -5.653 | 0.236  | 2.780 | 2.543 |
| 0.322 | 0.519 | -5.252 | -0.269 | 2.643 | 2.912 |
| 0.082 | 0.254 | -4.293 | -0.625 | 2.969 | 3.594 |
| 0.439 | 0.623 | -5.431 | -0.279 | 2.850 | 3.129 |
| 0.810 | 0.893 | -5.687 | 0.105  | 2.796 | 2.691 |
| 0.373 | 0.563 | -5.339 | -0.279 | 2.358 | 2.636 |
| 0.025 | 0.175 | -3.353 | 1.037  | 5.999 | 4.962 |
| 0.003 | 0.157 | -1.694 | 0.891  | 2.617 | 1.726 |

|       |       |        |        |       |       |
|-------|-------|--------|--------|-------|-------|
| 0.959 | 0.979 | -5.714 | 0.015  | 2.019 | 2.004 |
| 0.193 | 0.386 | -4.915 | 0.475  | 2.603 | 2.128 |
| 0.618 | 0.762 | -5.597 | 0.126  | 5.881 | 5.755 |
| 0.072 | 0.239 | -4.190 | -0.446 | 3.067 | 3.513 |
| 0.602 | 0.751 | -5.586 | -0.141 | 4.028 | 4.169 |
| 0.619 | 0.763 | -5.598 | -0.141 | 3.969 | 4.110 |
| 0.015 | 0.160 | -2.943 | 0.694  | 3.142 | 2.447 |
| 0.891 | 0.941 | -5.706 | 0.060  | 3.755 | 3.695 |
| 0.705 | 0.825 | -5.647 | -0.108 | 3.051 | 3.158 |
| 0.366 | 0.558 | -5.329 | -0.246 | 2.230 | 2.476 |
| 0.941 | 0.968 | -5.712 | 0.050  | 3.496 | 3.446 |
| 0.997 | 0.999 | -5.715 | -0.001 | 3.235 | 3.236 |
| 0.034 | 0.184 | -3.602 | 1.661  | 5.156 | 3.495 |
| 0.367 | 0.558 | -5.330 | 0.242  | 3.637 | 3.395 |
| 0.436 | 0.620 | -5.428 | -0.204 | 2.409 | 2.612 |
| 0.627 | 0.769 | -5.603 | 0.136  | 3.167 | 3.031 |
| 0.041 | 0.196 | -3.764 | 0.688  | 3.618 | 2.931 |
| 0.071 | 0.239 | -4.183 | 0.799  | 5.791 | 4.992 |
| 0.048 | 0.205 | -3.881 | 1.082  | 4.872 | 3.790 |
| 0.285 | 0.483 | -5.175 | 0.421  | 4.957 | 4.536 |
| 0.094 | 0.270 | -4.392 | -0.864 | 3.885 | 4.748 |
| 0.032 | 0.182 | -3.557 | -1.357 | 2.702 | 4.058 |
| 0.269 | 0.467 | -5.136 | 0.453  | 3.242 | 2.789 |
| 0.017 | 0.162 | -3.066 | 0.929  | 3.755 | 2.826 |
| 0.044 | 0.201 | -3.816 | 1.224  | 6.358 | 5.133 |
| 0.086 | 0.258 | -4.327 | 0.337  | 6.170 | 5.834 |
| 0.755 | 0.858 | -5.669 | 0.109  | 6.362 | 6.253 |
| 0.366 | 0.557 | -5.328 | -0.346 | 1.898 | 2.244 |
| 0.098 | 0.274 | -4.423 | -0.997 | 2.941 | 3.938 |
| 0.178 | 0.368 | -4.857 | 0.300  | 7.792 | 7.492 |
| 0.290 | 0.488 | -5.184 | 0.287  | 3.110 | 2.823 |
| 0.998 | 0.999 | -5.715 | -0.001 | 4.053 | 4.053 |
| 0.965 | 0.982 | -5.714 | 0.012  | 3.441 | 3.429 |
| 0.273 | 0.471 | -5.147 | 0.247  | 5.535 | 5.288 |
| 0.495 | 0.667 | -5.494 | 0.186  | 1.936 | 1.750 |
| 0.005 | 0.157 | -2.031 | -0.757 | 2.005 | 2.762 |
| 0.162 | 0.351 | -4.791 | -0.367 | 4.120 | 4.486 |
| 0.073 | 0.241 | -4.205 | -0.897 | 2.639 | 3.536 |
| 0.293 | 0.491 | -5.192 | 0.396  | 4.285 | 3.889 |
| 0.364 | 0.556 | -5.325 | -0.316 | 3.272 | 3.588 |
| 0.136 | 0.319 | -4.664 | -0.541 | 2.221 | 2.762 |
| 0.242 | 0.440 | -5.069 | -0.310 | 2.084 | 2.394 |
| 0.383 | 0.572 | -5.355 | 0.182  | 4.588 | 4.405 |
| 0.246 | 0.443 | -5.078 | -0.311 | 4.903 | 5.215 |
| 0.101 | 0.278 | -4.447 | 0.456  | 4.179 | 3.723 |
| 0.500 | 0.671 | -5.499 | -0.185 | 1.872 | 2.057 |
| 0.567 | 0.723 | -5.559 | -0.124 | 7.067 | 7.191 |
| 0.622 | 0.765 | -5.600 | 0.123  | 4.523 | 4.399 |
| 0.010 | 0.157 | -2.595 | 1.499  | 5.785 | 4.286 |
| 0.245 | 0.442 | -5.076 | 0.345  | 3.388 | 3.042 |

|       |       |        |        |       |       |
|-------|-------|--------|--------|-------|-------|
| 0.083 | 0.254 | -4.297 | -0.623 | 2.355 | 2.978 |
| 0.004 | 0.157 | -1.857 | -1.227 | 1.982 | 3.208 |
| 0.010 | 0.157 | -2.620 | 1.000  | 5.057 | 4.058 |
| 0.057 | 0.218 | -4.008 | 0.502  | 5.608 | 5.106 |
| 0.682 | 0.809 | -5.635 | 0.119  | 2.691 | 2.572 |
| 0.282 | 0.480 | -5.167 | -0.213 | 5.432 | 5.646 |
| 0.495 | 0.667 | -5.494 | 0.185  | 4.726 | 4.540 |
| 0.446 | 0.629 | -5.440 | -0.214 | 3.606 | 3.820 |
| 0.216 | 0.411 | -4.992 | -0.416 | 4.835 | 5.251 |
| 0.004 | 0.157 | -1.772 | 0.803  | 4.701 | 3.898 |
| 0.433 | 0.618 | -5.424 | 0.305  | 5.688 | 5.383 |
| 0.229 | 0.427 | -5.033 | -0.477 | 4.359 | 4.837 |
| 0.519 | 0.686 | -5.518 | -0.193 | 4.527 | 4.720 |
| 0.028 | 0.178 | -3.454 | -0.688 | 4.441 | 5.129 |
| 0.058 | 0.219 | -4.027 | -0.549 | 6.618 | 7.167 |
| 0.060 | 0.222 | -4.056 | -0.503 | 6.396 | 6.899 |
| 0.066 | 0.230 | -4.124 | -0.502 | 6.472 | 6.974 |
| 0.032 | 0.182 | -3.556 | -0.563 | 6.602 | 7.165 |
| 0.809 | 0.893 | -5.687 | 0.080  | 4.747 | 4.667 |
| 0.060 | 0.222 | -4.052 | 1.205  | 4.705 | 3.500 |
| 0.046 | 0.203 | -3.837 | 0.594  | 3.643 | 3.049 |
| 0.149 | 0.335 | -4.734 | -0.422 | 2.280 | 2.702 |
| 0.667 | 0.798 | -5.627 | 0.130  | 2.594 | 2.464 |
| 0.095 | 0.271 | -4.404 | -0.678 | 3.952 | 4.629 |
| 0.033 | 0.184 | -3.579 | -0.569 | 6.316 | 6.885 |
| 0.918 | 0.956 | -5.710 | 0.030  | 3.623 | 3.593 |
| 0.001 | 0.157 | -0.717 | -1.872 | 1.966 | 3.838 |
| 0.523 | 0.689 | -5.522 | -0.208 | 5.286 | 5.494 |
| 0.821 | 0.899 | -5.691 | -0.069 | 4.720 | 4.789 |
| 0.015 | 0.160 | -2.941 | -0.966 | 5.546 | 6.512 |
| 0.046 | 0.203 | -3.838 | 1.082  | 5.929 | 4.846 |
| 0.063 | 0.226 | -4.089 | 0.615  | 4.125 | 3.510 |
| 0.031 | 0.181 | -3.535 | 1.271  | 7.109 | 5.837 |
| 0.663 | 0.795 | -5.625 | 0.123  | 3.195 | 3.072 |
| 0.017 | 0.162 | -3.075 | 0.741  | 4.626 | 3.886 |
| 0.012 | 0.160 | -2.781 | -0.883 | 2.051 | 2.934 |
| 0.393 | 0.581 | -5.370 | 0.255  | 3.141 | 2.887 |
| 0.118 | 0.298 | -4.565 | -0.449 | 3.068 | 3.517 |
| 0.441 | 0.625 | -5.434 | -0.272 | 2.663 | 2.935 |
| 0.201 | 0.396 | -4.942 | -0.270 | 4.720 | 4.990 |
| 0.824 | 0.900 | -5.691 | 0.076  | 4.141 | 4.065 |
| 0.161 | 0.350 | -4.788 | -0.447 | 2.093 | 2.540 |
| 0.018 | 0.163 | -3.097 | 1.011  | 3.826 | 2.815 |
| 0.061 | 0.224 | -4.068 | -0.595 | 2.129 | 2.724 |
| 0.092 | 0.267 | -4.375 | 0.568  | 4.065 | 3.497 |
| 0.032 | 0.182 | -3.556 | 0.825  | 3.051 | 2.226 |
| 0.111 | 0.290 | -4.521 | 0.573  | 4.964 | 4.391 |
| 0.922 | 0.958 | -5.710 | -0.028 | 2.151 | 2.179 |
| 0.023 | 0.173 | -3.294 | 0.611  | 2.538 | 1.927 |
| 0.362 | 0.554 | -5.322 | -0.389 | 3.414 | 3.804 |



|       |       |        |        |       |       |
|-------|-------|--------|--------|-------|-------|
| 0.044 | 0.201 | -3.819 | 0.728  | 2.492 | 1.765 |
| 0.114 | 0.293 | -4.537 | -0.470 | 3.261 | 3.731 |
| 0.011 | 0.158 | -2.713 | -1.449 | 3.220 | 4.670 |
| 0.283 | 0.481 | -5.170 | 0.303  | 3.627 | 3.324 |
| 0.830 | 0.904 | -5.693 | 0.095  | 4.758 | 4.663 |
| 0.293 | 0.491 | -5.193 | -0.288 | 5.108 | 5.396 |
| 0.987 | 0.993 | -5.715 | -0.006 | 2.340 | 2.345 |
| 0.222 | 0.419 | -5.011 | -1.026 | 1.056 | 2.082 |
| 0.468 | 0.647 | -5.466 | -0.281 | 3.582 | 3.862 |
| 0.833 | 0.907 | -5.694 | 0.062  | 6.022 | 5.960 |
| 0.122 | 0.303 | -4.588 | 0.499  | 5.659 | 5.160 |
| 0.037 | 0.189 | -3.667 | 0.822  | 2.875 | 2.053 |
| 0.011 | 0.157 | -2.699 | 1.771  | 4.817 | 3.045 |
| 0.130 | 0.311 | -4.634 | 0.473  | 4.686 | 4.213 |
| 0.067 | 0.231 | -4.132 | 1.008  | 6.263 | 5.255 |
| 0.114 | 0.293 | -4.539 | -0.869 | 1.666 | 2.535 |
| 0.052 | 0.212 | -3.945 | -0.646 | 6.579 | 7.225 |
| 0.034 | 0.185 | -3.611 | -1.048 | 4.736 | 5.784 |
| 0.323 | 0.519 | -5.253 | -0.488 | 2.329 | 2.817 |
| 0.046 | 0.203 | -3.838 | -0.770 | 5.772 | 6.543 |
| 0.387 | 0.575 | -5.361 | -0.307 | 6.784 | 7.091 |
| 0.034 | 0.184 | -3.602 | 0.605  | 2.840 | 2.235 |
| 0.076 | 0.245 | -4.237 | -0.627 | 5.922 | 6.550 |
| 0.180 | 0.371 | -4.865 | -0.384 | 3.111 | 3.495 |
| 0.425 | 0.610 | -5.413 | -0.276 | 1.630 | 1.906 |
| 0.161 | 0.349 | -4.787 | 0.292  | 7.468 | 7.176 |
| 0.021 | 0.168 | -3.213 | 0.591  | 8.209 | 7.618 |
| 0.216 | 0.411 | -4.992 | -0.351 | 3.917 | 4.268 |
| 0.808 | 0.892 | -5.687 | 0.051  | 5.679 | 5.628 |
| 0.147 | 0.331 | -4.721 | -0.354 | 3.945 | 4.299 |
| 0.263 | 0.461 | -5.123 | 0.345  | 4.315 | 3.970 |
| 0.024 | 0.173 | -3.332 | 0.823  | 6.226 | 5.403 |
| 0.005 | 0.157 | -2.110 | 1.189  | 7.321 | 6.132 |
| 0.003 | 0.157 | -1.653 | 1.109  | 5.920 | 4.811 |
| 0.072 | 0.239 | -4.189 | 0.658  | 3.832 | 3.173 |
| 0.428 | 0.614 | -5.417 | -0.247 | 3.163 | 3.410 |
| 0.010 | 0.157 | -2.641 | 1.018  | 8.051 | 7.033 |
| 0.025 | 0.175 | -3.356 | 0.831  | 6.176 | 5.345 |
| 0.591 | 0.743 | -5.578 | 0.162  | 2.454 | 2.292 |
| 0.048 | 0.205 | -3.877 | 0.644  | 6.179 | 5.536 |
| 0.047 | 0.204 | -3.863 | 1.045  | 6.144 | 5.098 |
| 0.020 | 0.167 | -3.175 | 0.701  | 4.155 | 3.455 |
| 0.912 | 0.952 | -5.709 | -0.027 | 1.931 | 1.958 |
| 0.310 | 0.507 | -5.227 | -0.303 | 3.225 | 3.528 |
| 0.002 | 0.157 | -1.117 | 1.300  | 3.187 | 1.887 |
| 0.094 | 0.270 | -4.393 | -0.453 | 3.686 | 4.139 |
| 0.961 | 0.980 | -5.714 | 0.022  | 3.079 | 3.057 |
| 0.771 | 0.868 | -5.675 | -0.076 | 2.045 | 2.121 |
| 0.514 | 0.682 | -5.513 | -0.240 | 2.245 | 2.485 |
| 0.175 | 0.365 | -4.848 | -0.449 | 4.343 | 4.792 |

|       |       |        |        |       |       |
|-------|-------|--------|--------|-------|-------|
| 0.050 | 0.208 | -3.918 | 0.635  | 2.991 | 2.356 |
| 0.550 | 0.711 | -5.546 | -0.160 | 3.388 | 3.548 |
| 0.202 | 0.397 | -4.945 | -0.491 | 1.816 | 2.307 |
| 0.656 | 0.791 | -5.621 | -0.096 | 2.901 | 2.997 |
| 0.365 | 0.557 | -5.326 | -0.269 | 3.483 | 3.752 |
| 0.097 | 0.274 | -4.420 | -0.482 | 2.096 | 2.578 |
| 0.589 | 0.742 | -5.577 | 0.120  | 2.592 | 2.472 |
| 0.001 | 0.157 | -0.824 | 1.132  | 3.257 | 2.125 |
| 0.760 | 0.862 | -5.671 | -0.076 | 5.412 | 5.488 |
| 0.574 | 0.728 | -5.565 | -0.183 | 3.861 | 4.044 |
| 0.058 | 0.219 | -4.027 | -0.381 | 1.366 | 1.747 |
| 0.056 | 0.218 | -4.004 | -0.894 | 2.657 | 3.551 |
| 0.591 | 0.744 | -5.578 | -0.269 | 3.267 | 3.536 |
| 0.094 | 0.270 | -4.396 | 0.421  | 3.865 | 3.445 |
| 0.028 | 0.178 | -3.450 | -0.711 | 2.820 | 3.531 |
| 0.238 | 0.434 | -5.056 | 0.297  | 5.157 | 4.860 |
| 0.968 | 0.984 | -5.714 | -0.011 | 2.826 | 2.837 |
| 0.093 | 0.270 | -4.390 | -0.454 | 2.347 | 2.801 |
| 0.006 | 0.157 | -2.218 | 0.945  | 4.362 | 3.417 |
| 0.006 | 0.157 | -2.202 | 0.908  | 3.499 | 2.591 |
| 0.159 | 0.348 | -4.780 | 0.400  | 3.768 | 3.368 |
| 0.011 | 0.157 | -2.704 | 0.719  | 3.657 | 2.937 |
| 0.099 | 0.276 | -4.434 | 0.554  | 3.773 | 3.219 |
| 0.021 | 0.168 | -3.223 | 0.702  | 3.200 | 2.498 |
| 0.227 | 0.424 | -5.024 | -0.301 | 2.248 | 2.550 |
| 0.180 | 0.371 | -4.868 | 0.337  | 4.051 | 3.715 |
| 0.560 | 0.718 | -5.554 | -0.136 | 1.615 | 1.751 |
| 0.812 | 0.894 | -5.688 | -0.074 | 2.447 | 2.521 |
| 0.200 | 0.394 | -4.938 | -0.367 | 3.060 | 3.428 |
| 0.605 | 0.753 | -5.588 | -0.151 | 4.100 | 4.251 |
| 0.112 | 0.291 | -4.526 | 0.604  | 3.914 | 3.310 |
| 0.125 | 0.306 | -4.604 | -0.508 | 2.400 | 2.908 |
| 0.956 | 0.978 | -5.713 | -0.016 | 3.885 | 3.901 |
| 0.397 | 0.585 | -5.376 | 0.203  | 3.579 | 3.376 |
| 0.308 | 0.505 | -5.224 | -0.338 | 3.583 | 3.921 |
| 0.532 | 0.696 | -5.530 | -0.195 | 3.507 | 3.702 |
| 0.732 | 0.843 | -5.659 | 0.111  | 2.895 | 2.784 |
| 0.155 | 0.342 | -4.759 | -0.547 | 3.114 | 3.661 |
| 0.063 | 0.227 | -4.093 | -0.632 | 4.291 | 4.923 |
| 0.360 | 0.553 | -5.319 | 0.277  | 2.748 | 2.471 |
| 0.079 | 0.249 | -4.261 | 0.503  | 4.293 | 3.790 |
| 0.421 | 0.607 | -5.409 | 0.260  | 3.426 | 3.167 |
| 0.060 | 0.221 | -4.047 | -0.467 | 7.392 | 7.859 |
| 0.173 | 0.362 | -4.838 | 0.407  | 3.508 | 3.101 |
| 0.556 | 0.715 | -5.550 | 0.162  | 2.691 | 2.529 |
| 0.318 | 0.516 | -5.243 | 0.282  | 4.996 | 4.714 |
| 0.819 | 0.897 | -5.690 | 0.069  | 3.108 | 3.039 |
| 0.631 | 0.772 | -5.606 | -0.134 | 3.801 | 3.935 |
| 0.002 | 0.157 | -1.289 | 0.952  | 2.880 | 1.928 |
| 0.162 | 0.351 | -4.793 | -0.426 | 2.006 | 2.432 |

|       |       |        |        |       |       |
|-------|-------|--------|--------|-------|-------|
| 0.001 | 0.157 | -0.776 | -0.914 | 3.090 | 4.005 |
| 0.770 | 0.868 | -5.674 | 0.089  | 3.840 | 3.752 |
| 0.125 | 0.306 | -4.606 | -0.391 | 5.249 | 5.639 |
| 0.580 | 0.735 | -5.570 | 0.142  | 2.066 | 1.924 |
| 0.030 | 0.179 | -3.507 | 0.775  | 4.470 | 3.695 |
| 0.191 | 0.384 | -4.909 | -0.364 | 4.770 | 5.134 |
| 0.220 | 0.416 | -5.004 | -0.363 | 7.650 | 8.013 |
| 0.236 | 0.433 | -5.052 | -0.361 | 7.583 | 7.945 |
| 0.433 | 0.618 | -5.424 | -0.406 | 4.464 | 4.870 |
| 0.026 | 0.176 | -3.407 | -0.714 | 3.637 | 4.351 |
| 0.155 | 0.342 | -4.761 | -0.448 | 4.731 | 5.179 |
| 0.236 | 0.433 | -5.051 | -0.350 | 4.776 | 5.126 |
| 0.245 | 0.442 | -5.076 | -0.412 | 4.551 | 4.963 |
| 0.271 | 0.469 | -5.142 | -0.364 | 5.733 | 6.097 |
| 0.342 | 0.537 | -5.287 | -0.350 | 4.088 | 4.438 |
| 0.846 | 0.915 | -5.697 | -0.117 | 4.255 | 4.371 |
| 0.054 | 0.215 | -3.973 | 0.519  | 3.050 | 2.531 |
| 0.164 | 0.353 | -4.802 | -0.488 | 3.646 | 4.134 |
| 0.282 | 0.480 | -5.167 | 0.304  | 5.552 | 5.248 |
| 0.698 | 0.820 | -5.644 | -0.112 | 3.795 | 3.907 |
| 0.214 | 0.409 | -4.986 | -0.499 | 8.652 | 9.151 |
| 0.912 | 0.953 | -5.709 | -0.030 | 4.748 | 4.778 |
| 0.642 | 0.780 | -5.613 | -0.106 | 4.239 | 4.344 |
| 0.610 | 0.756 | -5.592 | -0.135 | 3.300 | 3.435 |
| 0.111 | 0.290 | -4.517 | 0.527  | 4.759 | 4.232 |
| 0.088 | 0.262 | -4.345 | 0.662  | 4.079 | 3.417 |
| 0.180 | 0.371 | -4.867 | -0.391 | 3.139 | 3.530 |
| 0.047 | 0.203 | -3.855 | 0.644  | 4.684 | 4.041 |
| 0.087 | 0.259 | -4.333 | -0.545 | 3.985 | 4.530 |
| 0.929 | 0.961 | -5.711 | 0.022  | 4.475 | 4.453 |
| 0.023 | 0.173 | -3.291 | 0.554  | 3.840 | 3.286 |
| 0.058 | 0.220 | -4.029 | -0.517 | 2.978 | 3.495 |
| 0.231 | 0.428 | -5.038 | 0.323  | 3.543 | 3.220 |
| 0.416 | 0.603 | -5.402 | -0.179 | 5.184 | 5.364 |
| 0.011 | 0.157 | -2.665 | 0.570  | 3.210 | 2.639 |
| 0.907 | 0.950 | -5.708 | -0.032 | 2.275 | 2.307 |
| 0.010 | 0.157 | -2.648 | -0.738 | 1.991 | 2.729 |
| 0.415 | 0.603 | -5.401 | 0.185  | 2.014 | 1.829 |
| 0.213 | 0.409 | -4.984 | -0.579 | 1.835 | 2.414 |
| 0.418 | 0.604 | -5.404 | -0.513 | 2.819 | 3.332 |
| 0.306 | 0.504 | -5.220 | -0.295 | 2.482 | 2.777 |
| 0.582 | 0.736 | -5.571 | -0.165 | 3.860 | 4.025 |
| 0.005 | 0.157 | -1.989 | -0.782 | 2.145 | 2.926 |
| 0.882 | 0.936 | -5.704 | 0.039  | 4.181 | 4.142 |
| 0.041 | 0.195 | -3.760 | -0.624 | 1.982 | 2.606 |
| 0.296 | 0.493 | -5.199 | -0.328 | 2.360 | 2.688 |
| 0.077 | 0.247 | -4.247 | -0.559 | 1.930 | 2.489 |
| 0.405 | 0.593 | -5.386 | 0.209  | 3.124 | 2.915 |
| 0.007 | 0.157 | -2.366 | 0.649  | 4.367 | 3.717 |
| 0.166 | 0.355 | -4.808 | -0.430 | 2.554 | 2.984 |

|       |       |        |        |       |       |
|-------|-------|--------|--------|-------|-------|
| 0.500 | 0.671 | -5.499 | -0.191 | 3.558 | 3.749 |
| 0.758 | 0.860 | -5.670 | 0.112  | 3.000 | 2.887 |
| 0.158 | 0.347 | -4.776 | -0.445 | 3.316 | 3.761 |
| 0.772 | 0.869 | -5.675 | -0.084 | 3.934 | 4.018 |
| 0.359 | 0.552 | -5.317 | -0.249 | 3.350 | 3.599 |
| 0.022 | 0.170 | -3.251 | -0.954 | 3.604 | 4.559 |
| 0.045 | 0.202 | -3.831 | 0.941  | 4.376 | 3.435 |
| 0.097 | 0.273 | -4.416 | -0.461 | 2.952 | 3.413 |
| 0.388 | 0.576 | -5.362 | 0.336  | 2.883 | 2.547 |
| 0.942 | 0.969 | -5.712 | 0.018  | 2.358 | 2.340 |
| 0.709 | 0.827 | -5.649 | 0.108  | 3.010 | 2.902 |
| 0.286 | 0.484 | -5.177 | -0.345 | 3.248 | 3.594 |
| 0.109 | 0.288 | -4.506 | 0.495  | 2.865 | 2.370 |
| 0.308 | 0.505 | -5.222 | -0.362 | 2.147 | 2.509 |
| 0.180 | 0.370 | -4.865 | 0.376  | 5.503 | 5.128 |
| 0.082 | 0.254 | -4.292 | -0.462 | 4.888 | 5.351 |
| 0.915 | 0.954 | -5.709 | -0.034 | 5.411 | 5.445 |
| 0.031 | 0.180 | -3.522 | -0.644 | 2.688 | 3.332 |
| 0.002 | 0.157 | -1.464 | 1.684  | 5.095 | 3.412 |
| 0.295 | 0.492 | -5.197 | -0.334 | 5.664 | 5.997 |
| 0.502 | 0.672 | -5.501 | 0.255  | 2.514 | 2.260 |
| 0.728 | 0.841 | -5.658 | 0.088  | 3.104 | 3.016 |
| 0.179 | 0.369 | -4.861 | -0.431 | 3.741 | 4.171 |
| 0.557 | 0.716 | -5.551 | -0.146 | 1.912 | 2.058 |
| 0.270 | 0.468 | -5.140 | -0.481 | 3.145 | 3.626 |
| 0.440 | 0.624 | -5.433 | -0.309 | 1.443 | 1.752 |
| 0.251 | 0.449 | -5.092 | -0.417 | 2.851 | 3.268 |
| 0.086 | 0.258 | -4.323 | -0.473 | 3.159 | 3.633 |
| 0.009 | 0.157 | -2.550 | -1.832 | 2.312 | 4.144 |
| 0.013 | 0.160 | -2.838 | 1.297  | 5.270 | 3.974 |
| 0.984 | 0.991 | -5.715 | -0.007 | 4.276 | 4.284 |
| 0.508 | 0.677 | -5.508 | 0.173  | 3.406 | 3.233 |
| 0.608 | 0.754 | -5.590 | -0.160 | 2.509 | 2.669 |
| 0.233 | 0.430 | -5.043 | 0.385  | 4.492 | 4.107 |
| 0.153 | 0.341 | -4.754 | -0.706 | 2.892 | 3.598 |
| 0.231 | 0.428 | -5.038 | -0.323 | 3.495 | 3.818 |
| 0.123 | 0.304 | -4.594 | -0.437 | 3.880 | 4.317 |
| 0.372 | 0.562 | -5.338 | 0.225  | 2.490 | 2.264 |
| 0.203 | 0.398 | -4.948 | -0.303 | 2.988 | 3.290 |
| 0.054 | 0.215 | -3.972 | -0.685 | 2.348 | 3.033 |
| 0.148 | 0.332 | -4.727 | -0.435 | 2.487 | 2.922 |
| 0.264 | 0.462 | -5.125 | -0.291 | 5.755 | 6.046 |
| 0.018 | 0.162 | -3.078 | 0.807  | 5.411 | 4.604 |
| 0.467 | 0.646 | -5.464 | -0.194 | 1.791 | 1.985 |
| 0.155 | 0.343 | -4.763 | -0.463 | 3.616 | 4.079 |
| 0.017 | 0.162 | -3.065 | 0.967  | 5.444 | 4.477 |
| 0.214 | 0.409 | -4.985 | 0.313  | 4.050 | 3.736 |
| 0.390 | 0.577 | -5.365 | -0.253 | 2.282 | 2.535 |
| 0.499 | 0.670 | -5.498 | -0.207 | 2.798 | 3.006 |
| 0.409 | 0.596 | -5.392 | 0.308  | 3.254 | 2.945 |

|       |       |        |        |       |       |
|-------|-------|--------|--------|-------|-------|
| 0.247 | 0.444 | -5.081 | -0.504 | 2.272 | 2.776 |
| 0.014 | 0.160 | -2.883 | -0.744 | 3.661 | 4.405 |
| 0.214 | 0.409 | -4.985 | 0.562  | 3.004 | 2.442 |
| 0.025 | 0.174 | -3.348 | -0.667 | 2.999 | 3.667 |
| 0.143 | 0.327 | -4.702 | -0.553 | 3.109 | 3.663 |
| 0.254 | 0.452 | -5.101 | -0.302 | 2.814 | 3.116 |
| 0.034 | 0.185 | -3.610 | 1.081  | 6.620 | 5.539 |
| 0.038 | 0.192 | -3.702 | 1.083  | 6.099 | 5.016 |
| 0.071 | 0.239 | -4.184 | -0.736 | 3.521 | 4.257 |
| 0.348 | 0.543 | -5.298 | 0.268  | 5.481 | 5.213 |
| 0.393 | 0.581 | -5.370 | -0.252 | 4.408 | 4.660 |
| 0.026 | 0.175 | -3.385 | -0.604 | 7.426 | 8.029 |
| 0.588 | 0.741 | -5.576 | -0.147 | 2.419 | 2.566 |
| 0.231 | 0.428 | -5.036 | -0.428 | 4.311 | 4.739 |
| 0.044 | 0.201 | -3.813 | -0.781 | 2.126 | 2.907 |
| 0.356 | 0.550 | -5.311 | 0.359  | 3.229 | 2.870 |
| 0.109 | 0.288 | -4.503 | -0.646 | 3.516 | 4.162 |
| 0.154 | 0.341 | -4.756 | -0.404 | 2.432 | 2.835 |
| 0.097 | 0.274 | -4.420 | 0.460  | 2.835 | 2.375 |
| 0.604 | 0.753 | -5.587 | -0.158 | 2.022 | 2.180 |
| 0.099 | 0.276 | -4.434 | -0.524 | 2.726 | 3.250 |
| 0.138 | 0.321 | -4.675 | 0.500  | 4.631 | 4.130 |
| 0.434 | 0.618 | -5.425 | -0.245 | 3.566 | 3.811 |
| 0.586 | 0.739 | -5.574 | -0.141 | 3.880 | 4.021 |
| 0.214 | 0.409 | -4.985 | -0.298 | 3.666 | 3.964 |
| 0.007 | 0.157 | -2.316 | -0.913 | 2.828 | 3.741 |
| 0.318 | 0.516 | -5.243 | -0.234 | 1.745 | 1.979 |
| 0.456 | 0.637 | -5.452 | -0.268 | 3.742 | 4.010 |
| 0.410 | 0.597 | -5.394 | -0.218 | 6.189 | 6.408 |
| 0.000 | 0.157 | 0.352  | 1.615  | 4.301 | 2.687 |
| 0.025 | 0.175 | -3.367 | 0.606  | 2.501 | 1.895 |
| 0.693 | 0.816 | -5.641 | -0.108 | 3.128 | 3.236 |
| 0.341 | 0.537 | -5.287 | -0.285 | 3.596 | 3.881 |
| 0.000 | 0.157 | -0.044 | -1.287 | 2.964 | 4.251 |
| 0.572 | 0.727 | -5.564 | -0.185 | 5.006 | 5.191 |
| 0.094 | 0.271 | -4.398 | -0.767 | 2.232 | 2.999 |
| 0.000 | 0.022 | 4.203  | 1.528  | 3.002 | 1.474 |
| 0.033 | 0.184 | -3.588 | -0.787 | 5.430 | 6.217 |
| 0.007 | 0.157 | -2.322 | 0.722  | 3.523 | 2.801 |
| 0.989 | 0.994 | -5.715 | -0.004 | 2.161 | 2.164 |
| 0.020 | 0.167 | -3.196 | 1.024  | 3.107 | 2.083 |
| 0.148 | 0.332 | -4.726 | -0.617 | 3.208 | 3.825 |
| 0.933 | 0.964 | -5.711 | 0.025  | 2.885 | 2.860 |
| 0.201 | 0.397 | -4.944 | 0.295  | 5.232 | 4.937 |
| 0.173 | 0.363 | -4.840 | 0.511  | 4.001 | 3.489 |
| 0.865 | 0.928 | -5.701 | 0.084  | 3.543 | 3.459 |
| 0.005 | 0.157 | -2.053 | -0.818 | 2.591 | 3.409 |
| 0.611 | 0.757 | -5.592 | 0.207  | 4.582 | 4.375 |
| 0.027 | 0.176 | -3.412 | 0.980  | 6.597 | 5.618 |
| 0.003 | 0.157 | -1.481 | 1.565  | 4.457 | 2.892 |

|       |       |        |        |       |       |
|-------|-------|--------|--------|-------|-------|
| 0.834 | 0.907 | -5.694 | -0.063 | 2.965 | 3.028 |
| 0.012 | 0.160 | -2.798 | -0.745 | 2.192 | 2.936 |
| 0.035 | 0.186 | -3.624 | 0.790  | 2.654 | 1.864 |
| 0.033 | 0.184 | -3.579 | 0.673  | 2.712 | 2.039 |
| 0.036 | 0.188 | -3.645 | -0.572 | 3.052 | 3.623 |
| 0.473 | 0.652 | -5.471 | 0.194  | 2.413 | 2.219 |
| 0.366 | 0.557 | -5.329 | -0.309 | 2.770 | 3.080 |
| 0.777 | 0.872 | -5.677 | 0.076  | 3.870 | 3.794 |
| 0.150 | 0.336 | -4.739 | -0.455 | 2.376 | 2.831 |
| 0.456 | 0.637 | -5.452 | -0.346 | 4.607 | 4.953 |
| 0.092 | 0.267 | -4.377 | -0.543 | 1.969 | 2.512 |
| 0.009 | 0.157 | -2.575 | 1.135  | 2.775 | 1.640 |
| 0.086 | 0.258 | -4.328 | -0.543 | 2.017 | 2.561 |
| 0.876 | 0.933 | -5.703 | -0.088 | 2.380 | 2.468 |
| 0.486 | 0.662 | -5.485 | 0.290  | 2.340 | 2.050 |
| 0.515 | 0.682 | -5.514 | -0.169 | 2.726 | 2.894 |
| 0.263 | 0.461 | -5.124 | -0.678 | 3.727 | 4.405 |
| 0.615 | 0.760 | -5.595 | -0.159 | 2.452 | 2.611 |
| 0.014 | 0.160 | -2.898 | 0.911  | 2.944 | 2.033 |
| 0.100 | 0.277 | -4.439 | -0.671 | 1.574 | 2.245 |
| 0.354 | 0.548 | -5.309 | 0.236  | 3.392 | 3.156 |
| 0.036 | 0.188 | -3.645 | 0.522  | 2.591 | 2.069 |
| 0.479 | 0.656 | -5.478 | 0.172  | 3.067 | 2.895 |
| 0.596 | 0.747 | -5.582 | -0.143 | 2.246 | 2.389 |
| 0.032 | 0.182 | -3.562 | 1.134  | 4.286 | 3.152 |
| 0.181 | 0.372 | -4.870 | -0.488 | 2.925 | 3.413 |
| 0.100 | 0.277 | -4.443 | 0.777  | 3.354 | 2.577 |
| 0.159 | 0.348 | -4.779 | -0.389 | 6.077 | 6.466 |
| 0.284 | 0.482 | -5.173 | 0.303  | 3.512 | 3.209 |
| 0.097 | 0.273 | -4.415 | 0.513  | 3.742 | 3.229 |
| 0.291 | 0.489 | -5.188 | -0.273 | 2.769 | 3.042 |
| 0.808 | 0.892 | -5.687 | -0.054 | 4.226 | 4.280 |
| 0.205 | 0.400 | -4.956 | 0.520  | 3.408 | 2.888 |
| 0.093 | 0.270 | -4.390 | -0.480 | 2.998 | 3.478 |
| 0.837 | 0.909 | -5.695 | -0.064 | 2.458 | 2.521 |
| 0.835 | 0.908 | -5.694 | -0.062 | 3.269 | 3.331 |
| 0.065 | 0.229 | -4.110 | -0.452 | 3.766 | 4.218 |
| 0.296 | 0.493 | -5.199 | -0.380 | 1.740 | 2.120 |
| 0.479 | 0.656 | -5.478 | -0.177 | 2.790 | 2.967 |
| 0.306 | 0.503 | -5.219 | -0.319 | 1.800 | 2.119 |
| 0.025 | 0.175 | -3.364 | 0.687  | 2.845 | 2.158 |
| 0.699 | 0.821 | -5.644 | 0.170  | 2.518 | 2.348 |
| 0.499 | 0.670 | -5.499 | -0.256 | 4.340 | 4.596 |
| 0.221 | 0.417 | -5.008 | -0.321 | 5.488 | 5.810 |
| 0.223 | 0.420 | -5.014 | -0.335 | 5.520 | 5.855 |
| 0.065 | 0.229 | -4.116 | -0.447 | 6.694 | 7.141 |
| 0.420 | 0.606 | -5.407 | 0.341  | 4.849 | 4.508 |
| 0.070 | 0.236 | -4.165 | 0.423  | 2.826 | 2.404 |
| 0.123 | 0.304 | -4.593 | -0.519 | 2.505 | 3.023 |
| 0.037 | 0.190 | -3.673 | -0.714 | 2.560 | 3.273 |

|       |       |        |        |       |       |
|-------|-------|--------|--------|-------|-------|
| 0.000 | 0.157 | 0.715  | -1.844 | 2.644 | 4.488 |
| 0.486 | 0.662 | -5.485 | -0.167 | 1.893 | 2.060 |
| 0.847 | 0.915 | -5.697 | -0.072 | 1.739 | 1.811 |
| 0.119 | 0.298 | -4.568 | -0.481 | 3.981 | 4.462 |
| 0.095 | 0.271 | -4.400 | -0.948 | 2.889 | 3.838 |
| 0.099 | 0.275 | -4.431 | -0.793 | 3.168 | 3.962 |
| 0.678 | 0.808 | -5.633 | -0.131 | 1.953 | 2.084 |
| 0.750 | 0.855 | -5.667 | -0.124 | 3.859 | 3.984 |
| 0.620 | 0.763 | -5.598 | 0.214  | 2.757 | 2.543 |
| 0.347 | 0.542 | -5.296 | -0.323 | 7.014 | 7.337 |
| 0.331 | 0.527 | -5.268 | -0.264 | 7.342 | 7.606 |
| 0.903 | 0.947 | -5.708 | -0.029 | 2.633 | 2.662 |
| 0.964 | 0.982 | -5.714 | 0.014  | 3.511 | 3.496 |
| 0.061 | 0.223 | -4.060 | 0.467  | 2.907 | 2.440 |
| 0.615 | 0.759 | -5.595 | 0.213  | 2.743 | 2.529 |
| 0.779 | 0.873 | -5.677 | 0.100  | 3.215 | 3.115 |
| 0.000 | 0.081 | 2.615  | 1.375  | 3.371 | 1.996 |
| 0.264 | 0.461 | -5.124 | 0.408  | 2.725 | 2.318 |
| 0.477 | 0.655 | -5.476 | -0.246 | 3.049 | 3.295 |
| 0.463 | 0.643 | -5.460 | -0.291 | 3.466 | 3.757 |
| 0.196 | 0.390 | -4.927 | -0.494 | 3.975 | 4.469 |
| 0.853 | 0.921 | -5.699 | 0.052  | 2.216 | 2.163 |
| 0.080 | 0.250 | -4.270 | -0.455 | 2.224 | 2.679 |
| 0.040 | 0.194 | -3.745 | 0.494  | 3.043 | 2.548 |
| 0.005 | 0.157 | -2.011 | 1.063  | 3.415 | 2.353 |
| 0.000 | 0.157 | 1.030  | 1.407  | 3.454 | 2.047 |
| 0.007 | 0.157 | -2.328 | 0.835  | 4.604 | 3.769 |
| 0.042 | 0.198 | -3.782 | -0.685 | 2.214 | 2.900 |
| 0.011 | 0.157 | -2.691 | 1.059  | 3.838 | 2.779 |
| 0.249 | 0.447 | -5.088 | -0.272 | 3.914 | 4.186 |
| 0.571 | 0.726 | -5.563 | 0.166  | 3.178 | 3.011 |
| 0.992 | 0.996 | -5.715 | -0.003 | 2.536 | 2.539 |
| 0.237 | 0.434 | -5.054 | -0.313 | 2.243 | 2.555 |
| 0.606 | 0.754 | -5.589 | -0.147 | 4.940 | 5.087 |
| 0.661 | 0.794 | -5.623 | -0.117 | 4.453 | 4.570 |
| 0.539 | 0.701 | -5.536 | 0.382  | 5.210 | 4.828 |
| 0.010 | 0.157 | -2.634 | -1.213 | 2.751 | 3.963 |
| 0.044 | 0.201 | -3.811 | -0.592 | 2.029 | 2.621 |
| 0.195 | 0.389 | -4.923 | -0.350 | 2.917 | 3.267 |
| 0.763 | 0.864 | -5.672 | 0.094  | 3.489 | 3.395 |
| 0.917 | 0.956 | -5.710 | -0.042 | 6.611 | 6.653 |
| 0.012 | 0.160 | -2.797 | -0.883 | 3.029 | 3.912 |
| 0.244 | 0.442 | -5.074 | -0.655 | 3.068 | 3.723 |
| 0.955 | 0.977 | -5.713 | -0.018 | 4.025 | 4.043 |
| 0.501 | 0.671 | -5.500 | -0.225 | 3.140 | 3.365 |
| 0.602 | 0.752 | -5.586 | 0.110  | 8.641 | 8.531 |
| 0.235 | 0.432 | -5.049 | -0.522 | 5.155 | 5.677 |
| 0.303 | 0.501 | -5.214 | -0.279 | 4.106 | 4.385 |
| 0.111 | 0.290 | -4.516 | -0.412 | 2.278 | 2.690 |
| 0.048 | 0.204 | -3.871 | -0.552 | 3.717 | 4.269 |

|       |       |        |        |       |       |
|-------|-------|--------|--------|-------|-------|
| 0.071 | 0.238 | -4.179 | -0.489 | 3.507 | 3.996 |
| 0.142 | 0.326 | -4.698 | -0.506 | 2.058 | 2.563 |
| 0.629 | 0.770 | -5.604 | 0.130  | 4.531 | 4.401 |
| 0.000 | 0.157 | 0.429  | 1.156  | 3.068 | 1.911 |
| 0.247 | 0.445 | -5.083 | 0.401  | 5.243 | 4.842 |
| 0.122 | 0.303 | -4.589 | 0.426  | 3.095 | 2.669 |
| 0.098 | 0.274 | -4.423 | 0.597  | 2.731 | 2.133 |
| 0.006 | 0.157 | -2.208 | 0.863  | 3.184 | 2.321 |
| 0.053 | 0.213 | -3.960 | -0.568 | 3.106 | 3.674 |
| 0.622 | 0.765 | -5.599 | -0.118 | 2.169 | 2.287 |
| 0.057 | 0.219 | -4.017 | 0.568  | 4.951 | 4.383 |
| 0.054 | 0.215 | -3.976 | -0.659 | 2.087 | 2.746 |
| 0.953 | 0.976 | -5.713 | -0.019 | 3.449 | 3.468 |
| 0.293 | 0.491 | -5.193 | 0.742  | 5.569 | 4.827 |
| 0.017 | 0.162 | -3.051 | 0.949  | 4.139 | 3.189 |
| 0.067 | 0.232 | -4.139 | -0.616 | 2.629 | 3.245 |
| 0.682 | 0.809 | -5.635 | -0.162 | 2.536 | 2.698 |
| 0.826 | 0.901 | -5.692 | -0.064 | 2.735 | 2.799 |
| 0.136 | 0.320 | -4.668 | -0.526 | 3.544 | 4.070 |
| 0.002 | 0.157 | -1.184 | 1.057  | 3.697 | 2.639 |
| 0.853 | 0.921 | -5.699 | 0.058  | 1.905 | 1.846 |
| 0.190 | 0.382 | -4.903 | -0.331 | 1.980 | 2.311 |
| 0.475 | 0.653 | -5.473 | -0.203 | 2.844 | 3.047 |
| 0.002 | 0.157 | -1.443 | 0.973  | 2.716 | 1.743 |
| 0.011 | 0.157 | -2.665 | 1.108  | 5.963 | 4.855 |
| 0.711 | 0.828 | -5.650 | -0.104 | 2.598 | 2.702 |
| 0.251 | 0.449 | -5.093 | 0.392  | 2.996 | 2.603 |
| 0.304 | 0.501 | -5.214 | 0.386  | 2.446 | 2.060 |
| 0.662 | 0.794 | -5.624 | 0.114  | 3.098 | 2.985 |
| 0.029 | 0.178 | -3.482 | 0.584  | 4.411 | 3.826 |
| 0.119 | 0.298 | -4.567 | -0.448 | 1.833 | 2.282 |
| 0.812 | 0.894 | -5.688 | -0.073 | 4.113 | 4.186 |
| 0.120 | 0.300 | -4.575 | 0.466  | 2.814 | 2.348 |
| 0.009 | 0.157 | -2.522 | 0.901  | 4.419 | 3.517 |
| 0.951 | 0.975 | -5.713 | 0.016  | 2.937 | 2.921 |
| 0.884 | 0.937 | -5.705 | 0.040  | 4.223 | 4.183 |
| 0.014 | 0.160 | -2.876 | -1.423 | 2.082 | 3.504 |
| 0.024 | 0.173 | -3.335 | -1.053 | 2.041 | 3.093 |
| 0.857 | 0.923 | -5.699 | -0.054 | 2.917 | 2.972 |
| 0.752 | 0.856 | -5.667 | 0.154  | 1.940 | 1.786 |
| 0.243 | 0.441 | -5.071 | -0.470 | 4.508 | 4.978 |
| 0.955 | 0.977 | -5.713 | 0.016  | 2.775 | 2.760 |
| 0.216 | 0.411 | -4.993 | -0.479 | 3.005 | 3.484 |
| 0.069 | 0.236 | -4.163 | -0.594 | 3.356 | 3.950 |
| 0.207 | 0.402 | -4.964 | -0.342 | 2.479 | 2.821 |
| 0.007 | 0.157 | -2.347 | 1.961  | 5.748 | 3.786 |
| 0.054 | 0.215 | -3.973 | -0.836 | 2.403 | 3.238 |
| 0.362 | 0.554 | -5.322 | -0.308 | 5.396 | 5.704 |
| 0.532 | 0.696 | -5.530 | -0.164 | 4.349 | 4.513 |
| 0.376 | 0.566 | -5.344 | 0.249  | 3.079 | 2.830 |



|       |       |        |        |       |       |
|-------|-------|--------|--------|-------|-------|
| 0.121 | 0.301 | -4.579 | -0.450 | 2.308 | 2.758 |
| 0.476 | 0.653 | -5.474 | -0.203 | 4.476 | 4.678 |
| 0.391 | 0.579 | -5.366 | -0.298 | 2.547 | 2.846 |
| 0.907 | 0.950 | -5.708 | -0.036 | 1.939 | 1.975 |
| 0.539 | 0.701 | -5.536 | -0.273 | 5.542 | 5.815 |
| 0.455 | 0.636 | -5.451 | 0.168  | 4.499 | 4.331 |
| 0.727 | 0.840 | -5.657 | -0.109 | 2.982 | 3.091 |
| 0.478 | 0.655 | -5.477 | 0.174  | 5.695 | 5.521 |
| 0.951 | 0.975 | -5.713 | -0.016 | 3.234 | 3.250 |
| 0.286 | 0.483 | -5.176 | -0.291 | 5.109 | 5.399 |
| 0.133 | 0.316 | -4.651 | 0.440  | 3.866 | 3.427 |
| 0.027 | 0.176 | -3.412 | -0.707 | 2.166 | 2.873 |
| 0.866 | 0.928 | -5.701 | 0.088  | 3.882 | 3.795 |
| 0.762 | 0.864 | -5.672 | -0.117 | 2.890 | 3.007 |
| 0.241 | 0.439 | -5.066 | 0.249  | 7.939 | 7.690 |
| 0.215 | 0.409 | -4.988 | -0.358 | 3.813 | 4.171 |
| 0.210 | 0.404 | -4.972 | 0.404  | 3.437 | 3.034 |
| 0.749 | 0.855 | -5.666 | -0.103 | 4.228 | 4.331 |
| 0.008 | 0.157 | -2.416 | 0.691  | 5.240 | 4.549 |
| 0.344 | 0.539 | -5.291 | -0.269 | 2.498 | 2.767 |
| 0.384 | 0.572 | -5.356 | -0.261 | 2.280 | 2.541 |
| 0.145 | 0.329 | -4.711 | 0.480  | 2.595 | 2.115 |
| 0.248 | 0.446 | -5.085 | 0.303  | 4.216 | 3.913 |
| 0.883 | 0.936 | -5.704 | 0.039  | 2.981 | 2.942 |
| 0.154 | 0.341 | -4.757 | -0.559 | 3.831 | 4.391 |
| 0.364 | 0.556 | -5.326 | 0.423  | 4.926 | 4.503 |
| 0.914 | 0.954 | -5.709 | -0.026 | 1.705 | 1.732 |
| 0.719 | 0.834 | -5.653 | -0.109 | 2.714 | 2.823 |
| 0.275 | 0.473 | -5.151 | 0.433  | 3.148 | 2.715 |
| 0.111 | 0.290 | -4.521 | 0.512  | 3.841 | 3.329 |
| 0.009 | 0.157 | -2.551 | 1.375  | 5.626 | 4.251 |
| 0.214 | 0.409 | -4.987 | -0.346 | 1.979 | 2.325 |
| 0.086 | 0.258 | -4.326 | 0.461  | 4.445 | 3.984 |
| 0.071 | 0.239 | -4.186 | -0.487 | 4.370 | 4.857 |
| 0.459 | 0.640 | -5.456 | -0.240 | 2.952 | 3.192 |
| 0.054 | 0.214 | -3.965 | 0.658  | 2.902 | 2.244 |
| 0.229 | 0.426 | -5.030 | -0.349 | 4.556 | 4.906 |
| 0.236 | 0.433 | -5.050 | 0.319  | 3.400 | 3.080 |
| 0.236 | 0.433 | -5.053 | -0.303 | 2.654 | 2.957 |
| 0.622 | 0.765 | -5.600 | -0.190 | 3.735 | 3.924 |
| 0.058 | 0.219 | -4.024 | -0.835 | 4.110 | 4.945 |
| 0.573 | 0.728 | -5.565 | -0.311 | 2.724 | 3.035 |
| 0.592 | 0.744 | -5.579 | -0.159 | 2.582 | 2.741 |
| 0.836 | 0.908 | -5.694 | 0.063  | 1.780 | 1.717 |
| 0.033 | 0.184 | -3.586 | -1.361 | 3.302 | 4.662 |
| 0.126 | 0.306 | -4.609 | -0.583 | 2.831 | 3.415 |
| 0.075 | 0.245 | -4.227 | -0.589 | 2.880 | 3.469 |
| 0.006 | 0.157 | -2.133 | -1.145 | 2.002 | 3.146 |
| 0.674 | 0.804 | -5.631 | 0.115  | 2.972 | 2.856 |
| 0.237 | 0.434 | -5.055 | -0.270 | 2.213 | 2.483 |

|       |       |        |        |       |       |
|-------|-------|--------|--------|-------|-------|
| 0.860 | 0.925 | -5.700 | 0.046  | 2.528 | 2.483 |
| 0.227 | 0.424 | -5.025 | 0.511  | 5.162 | 4.651 |
| 0.013 | 0.160 | -2.820 | -0.820 | 1.800 | 2.619 |
| 0.787 | 0.879 | -5.680 | -0.078 | 5.199 | 5.276 |
| 0.051 | 0.208 | -3.923 | -0.815 | 2.502 | 3.317 |
| 0.725 | 0.838 | -5.656 | 0.116  | 3.823 | 3.708 |
| 0.158 | 0.346 | -4.774 | -0.430 | 4.877 | 5.307 |
| 0.249 | 0.447 | -5.087 | 0.318  | 2.328 | 2.010 |
| 0.893 | 0.941 | -5.706 | -0.043 | 2.265 | 2.308 |
| 0.881 | 0.935 | -5.704 | -0.044 | 2.765 | 2.809 |
| 0.439 | 0.623 | -5.431 | -0.193 | 2.687 | 2.880 |
| 0.029 | 0.178 | -3.493 | 1.280  | 4.153 | 2.873 |
| 0.070 | 0.237 | -4.174 | -0.765 | 3.503 | 4.267 |
| 0.056 | 0.217 | -3.999 | 0.598  | 2.721 | 2.123 |
| 0.047 | 0.204 | -3.864 | 0.570  | 2.909 | 2.339 |
| 0.161 | 0.349 | -4.786 | -0.549 | 6.066 | 6.615 |
| 0.226 | 0.423 | -5.022 | -0.471 | 5.612 | 6.083 |
| 0.157 | 0.345 | -4.771 | -0.515 | 3.105 | 3.620 |
| 0.283 | 0.481 | -5.169 | 0.272  | 4.035 | 3.763 |
| 0.624 | 0.766 | -5.601 | -0.155 | 7.012 | 7.167 |
| 0.102 | 0.280 | -4.456 | -0.402 | 9.203 | 9.605 |
| 0.376 | 0.565 | -5.343 | -0.327 | 2.414 | 2.741 |
| 0.820 | 0.898 | -5.690 | 0.089  | 3.455 | 3.367 |
| 0.785 | 0.878 | -5.679 | 0.072  | 3.922 | 3.851 |
| 0.308 | 0.505 | -5.223 | 0.264  | 2.276 | 2.012 |
| 0.029 | 0.178 | -3.489 | 0.527  | 4.710 | 4.183 |
| 0.657 | 0.792 | -5.621 | -0.326 | 2.075 | 2.401 |
| 0.950 | 0.974 | -5.713 | 0.020  | 2.818 | 2.798 |
| 0.770 | 0.868 | -5.674 | 0.112  | 5.081 | 4.968 |
| 0.493 | 0.667 | -5.492 | -0.377 | 4.395 | 4.772 |
| 0.227 | 0.424 | -5.024 | 0.347  | 2.617 | 2.271 |
| 0.025 | 0.175 | -3.356 | -0.880 | 3.518 | 4.397 |
| 0.046 | 0.203 | -3.844 | -0.506 | 4.489 | 4.995 |
| 0.741 | 0.849 | -5.663 | -0.099 | 5.429 | 5.527 |
| 0.868 | 0.928 | -5.702 | -0.059 | 5.923 | 5.982 |
| 0.989 | 0.994 | -5.715 | 0.007  | 2.280 | 2.274 |
| 0.953 | 0.976 | -5.713 | -0.017 | 2.513 | 2.530 |
| 0.600 | 0.750 | -5.585 | 0.152  | 2.498 | 2.345 |
| 0.063 | 0.226 | -4.086 | 0.427  | 5.713 | 5.286 |
| 0.188 | 0.380 | -4.897 | 0.490  | 3.555 | 3.065 |
| 0.195 | 0.389 | -4.923 | 0.370  | 4.326 | 3.956 |
| 0.038 | 0.192 | -3.703 | -1.223 | 3.123 | 4.346 |
| 0.168 | 0.358 | -4.817 | -0.778 | 2.486 | 3.265 |
| 0.606 | 0.753 | -5.589 | -0.134 | 2.341 | 2.475 |
| 0.802 | 0.889 | -5.685 | 0.063  | 5.350 | 5.287 |
| 0.927 | 0.960 | -5.711 | -0.038 | 5.884 | 5.922 |
| 0.873 | 0.931 | -5.703 | -0.054 | 5.981 | 6.035 |
| 0.279 | 0.477 | -5.161 | -0.318 | 8.706 | 9.023 |
| 0.012 | 0.160 | -2.766 | 1.183  | 3.390 | 2.206 |
| 0.479 | 0.655 | -5.477 | 0.184  | 9.621 | 9.437 |

|       |       |        |        |       |       |
|-------|-------|--------|--------|-------|-------|
| 0.024 | 0.173 | -3.313 | 0.703  | 3.833 | 3.129 |
| 0.600 | 0.749 | -5.585 | 0.160  | 6.232 | 6.073 |
| 0.886 | 0.938 | -5.705 | -0.050 | 4.294 | 4.344 |
| 0.034 | 0.185 | -3.613 | 0.513  | 3.630 | 3.118 |
| 0.965 | 0.982 | -5.714 | 0.014  | 2.692 | 2.678 |
| 0.512 | 0.680 | -5.511 | -0.178 | 3.906 | 4.084 |
| 0.966 | 0.983 | -5.714 | -0.014 | 2.568 | 2.582 |
| 0.089 | 0.263 | -4.350 | -0.783 | 2.673 | 3.455 |
| 0.085 | 0.257 | -4.314 | -0.493 | 5.256 | 5.749 |
| 0.689 | 0.814 | -5.639 | 0.128  | 2.474 | 2.346 |
| 0.316 | 0.514 | -5.240 | 0.372  | 2.940 | 2.567 |
| 0.072 | 0.240 | -4.197 | 0.477  | 2.558 | 2.082 |
| 0.098 | 0.274 | -4.424 | 0.651  | 4.114 | 3.463 |
| 0.270 | 0.469 | -5.141 | 0.365  | 4.122 | 3.757 |
| 0.287 | 0.485 | -5.179 | 0.244  | 3.385 | 3.141 |
| 0.254 | 0.452 | -5.101 | -0.307 | 2.903 | 3.211 |
| 0.040 | 0.194 | -3.743 | 0.469  | 3.452 | 2.983 |
| 0.308 | 0.506 | -5.224 | 0.249  | 4.826 | 4.577 |
| 0.006 | 0.157 | -2.192 | -0.713 | 2.875 | 3.587 |
| 0.876 | 0.933 | -5.703 | 0.059  | 1.941 | 1.883 |
| 0.935 | 0.965 | -5.712 | -0.024 | 2.574 | 2.598 |
| 0.273 | 0.471 | -5.146 | 0.285  | 4.553 | 4.268 |
| 0.098 | 0.274 | -4.425 | 0.426  | 5.836 | 5.410 |
| 0.059 | 0.221 | -4.042 | 0.647  | 8.960 | 8.313 |
| 0.125 | 0.306 | -4.603 | 0.364  | 2.499 | 2.135 |
| 0.711 | 0.828 | -5.650 | 0.086  | 2.644 | 2.559 |
| 0.369 | 0.560 | -5.333 | -0.280 | 3.541 | 3.821 |
| 0.037 | 0.189 | -3.665 | -0.527 | 3.223 | 3.749 |
| 0.002 | 0.157 | -1.160 | -1.217 | 7.128 | 8.345 |
| 0.094 | 0.270 | -4.396 | 0.758  | 3.355 | 2.597 |
| 0.243 | 0.440 | -5.070 | -0.472 | 3.448 | 3.919 |
| 0.098 | 0.274 | -4.423 | -0.630 | 2.840 | 3.470 |
| 0.181 | 0.373 | -4.872 | -0.446 | 2.118 | 2.565 |
| 0.026 | 0.176 | -3.401 | -0.842 | 5.899 | 6.741 |
| 0.256 | 0.454 | -5.105 | -0.251 | 5.292 | 5.543 |
| 0.062 | 0.224 | -4.075 | 0.647  | 6.993 | 6.345 |
| 0.686 | 0.812 | -5.638 | 0.131  | 3.078 | 2.948 |
| 0.582 | 0.736 | -5.571 | -0.108 | 7.297 | 7.405 |
| 0.040 | 0.194 | -3.736 | 0.551  | 7.978 | 7.426 |
| 0.015 | 0.161 | -2.962 | 1.252  | 7.054 | 5.802 |
| 0.179 | 0.369 | -4.861 | 0.287  | 7.687 | 7.400 |
| 0.781 | 0.874 | -5.678 | 0.098  | 3.442 | 3.344 |
| 0.555 | 0.715 | -5.550 | 0.142  | 3.212 | 3.071 |
| 0.402 | 0.589 | -5.382 | -0.268 | 3.837 | 4.105 |
| 0.036 | 0.188 | -3.653 | -0.790 | 4.734 | 5.524 |
| 0.039 | 0.192 | -3.711 | 1.154  | 5.747 | 4.593 |
| 0.021 | 0.168 | -3.228 | 1.443  | 7.971 | 6.528 |
| 0.075 | 0.245 | -4.227 | 0.921  | 5.853 | 4.932 |
| 0.664 | 0.796 | -5.625 | 0.131  | 5.110 | 4.979 |
| 0.321 | 0.518 | -5.249 | -0.381 | 1.519 | 1.900 |

|       |       |        |        |       |       |
|-------|-------|--------|--------|-------|-------|
| 0.117 | 0.297 | -4.557 | -0.514 | 2.730 | 3.243 |
| 0.102 | 0.280 | -4.457 | 0.553  | 4.351 | 3.798 |
| 0.026 | 0.175 | -3.382 | 1.007  | 4.958 | 3.951 |
| 0.010 | 0.157 | -2.595 | 1.382  | 7.384 | 6.001 |
| 0.706 | 0.825 | -5.647 | 0.134  | 3.380 | 3.246 |
| 0.038 | 0.192 | -3.697 | -0.607 | 3.353 | 3.960 |
| 0.222 | 0.419 | -5.012 | -0.280 | 4.151 | 4.431 |
| 0.848 | 0.916 | -5.697 | 0.041  | 5.191 | 5.150 |
| 0.102 | 0.280 | -4.457 | 0.433  | 6.361 | 5.928 |
| 0.064 | 0.228 | -4.103 | 0.424  | 7.550 | 7.125 |
| 0.009 | 0.157 | -2.561 | -1.784 | 5.038 | 6.822 |
| 0.068 | 0.234 | -4.151 | -0.657 | 4.756 | 5.414 |
| 0.055 | 0.216 | -3.982 | 0.588  | 5.370 | 4.782 |
| 0.072 | 0.240 | -4.193 | -0.518 | 3.948 | 4.466 |
| 0.108 | 0.287 | -4.500 | 0.420  | 5.660 | 5.239 |
| 0.019 | 0.164 | -3.145 | -0.891 | 4.817 | 5.708 |
| 0.920 | 0.957 | -5.710 | 0.039  | 3.623 | 3.585 |
| 0.057 | 0.219 | -4.015 | 0.486  | 7.084 | 6.598 |
| 0.016 | 0.162 | -2.986 | 1.043  | 4.855 | 3.813 |
| 0.873 | 0.931 | -5.703 | -0.043 | 3.334 | 3.376 |
| 0.614 | 0.759 | -5.594 | -0.163 | 2.049 | 2.212 |
| 0.684 | 0.811 | -5.636 | 0.159  | 4.499 | 4.340 |
| 0.059 | 0.220 | -4.033 | -0.600 | 6.003 | 6.603 |
| 0.593 | 0.745 | -5.579 | 0.208  | 4.975 | 4.767 |
| 0.868 | 0.928 | -5.702 | 0.047  | 3.451 | 3.403 |
| 0.923 | 0.959 | -5.710 | 0.027  | 4.953 | 4.926 |
| 0.068 | 0.234 | -4.149 | 0.481  | 2.796 | 2.315 |
| 0.096 | 0.272 | -4.411 | 0.490  | 4.835 | 4.345 |
| 0.361 | 0.553 | -5.321 | 0.247  | 4.162 | 3.915 |
| 0.050 | 0.208 | -3.913 | 0.795  | 5.494 | 4.699 |
| 0.201 | 0.397 | -4.945 | 0.341  | 6.031 | 5.690 |
| 0.657 | 0.792 | -5.621 | -0.161 | 1.682 | 1.843 |
| 0.368 | 0.559 | -5.332 | -0.324 | 2.778 | 3.102 |
| 0.070 | 0.236 | -4.170 | 0.477  | 4.740 | 4.263 |
| 0.204 | 0.399 | -4.954 | 0.315  | 7.189 | 6.874 |
| 0.169 | 0.359 | -4.821 | 0.627  | 2.801 | 2.174 |
| 0.075 | 0.245 | -4.228 | 0.684  | 4.566 | 3.882 |
| 0.127 | 0.307 | -4.615 | 0.341  | 5.859 | 5.518 |
| 0.022 | 0.170 | -3.255 | 0.620  | 5.514 | 4.894 |
| 0.059 | 0.221 | -4.037 | -0.942 | 3.160 | 4.101 |
| 0.003 | 0.157 | -1.641 | 1.012  | 2.732 | 1.720 |
| 0.048 | 0.205 | -3.878 | 1.032  | 7.816 | 6.784 |
| 0.624 | 0.767 | -5.601 | -0.112 | 2.143 | 2.255 |
| 0.025 | 0.175 | -3.376 | 0.939  | 4.688 | 3.749 |
| 0.233 | 0.430 | -5.043 | 0.412  | 7.267 | 6.856 |
| 0.693 | 0.816 | -5.641 | 0.159  | 1.997 | 1.838 |
| 0.505 | 0.674 | -5.505 | -0.209 | 4.310 | 4.519 |
| 0.017 | 0.162 | -3.072 | 0.618  | 5.862 | 5.243 |
| 0.068 | 0.234 | -4.146 | 0.555  | 4.933 | 4.378 |
| 0.156 | 0.344 | -4.765 | 0.438  | 6.193 | 5.755 |

|       |       |        |        |       |       |
|-------|-------|--------|--------|-------|-------|
| 0.928 | 0.961 | -5.711 | -0.026 | 5.290 | 5.317 |
| 0.644 | 0.781 | -5.613 | 0.122  | 4.774 | 4.653 |
| 0.031 | 0.180 | -3.524 | 0.882  | 5.913 | 5.031 |
| 0.016 | 0.162 | -2.998 | 0.955  | 6.176 | 5.221 |
| 0.215 | 0.409 | -4.987 | 0.461  | 8.694 | 8.233 |
| 0.040 | 0.194 | -3.734 | 0.748  | 7.791 | 7.043 |
| 0.028 | 0.178 | -3.446 | 1.017  | 7.234 | 6.217 |
| 0.297 | 0.494 | -5.201 | 0.371  | 4.350 | 3.979 |
| 0.016 | 0.162 | -3.016 | 0.877  | 5.186 | 4.309 |
| 0.594 | 0.745 | -5.580 | -0.125 | 3.978 | 4.102 |
| 0.134 | 0.318 | -4.658 | -0.428 | 2.740 | 3.168 |
| 0.640 | 0.778 | -5.611 | 0.121  | 2.682 | 2.560 |
| 0.410 | 0.597 | -5.394 | -0.214 | 3.824 | 4.038 |
| 0.006 | 0.157 | -2.181 | -0.941 | 5.948 | 6.889 |
| 0.142 | 0.326 | -4.699 | -0.423 | 3.177 | 3.600 |
| 0.152 | 0.338 | -4.745 | -0.421 | 2.978 | 3.399 |
| 0.165 | 0.354 | -4.805 | -0.407 | 3.003 | 3.410 |
| 0.183 | 0.374 | -4.877 | -0.411 | 2.904 | 3.316 |
| 0.196 | 0.390 | -4.927 | -0.375 | 2.880 | 3.255 |
| 0.203 | 0.398 | -4.951 | -0.384 | 2.902 | 3.286 |
| 0.907 | 0.950 | -5.708 | -0.036 | 2.237 | 2.274 |
| 0.727 | 0.839 | -5.657 | -0.088 | 5.265 | 5.353 |
| 0.487 | 0.662 | -5.486 | 0.166  | 3.476 | 3.310 |
| 0.159 | 0.347 | -4.779 | -0.307 | 5.220 | 5.527 |
| 0.277 | 0.475 | -5.157 | 0.389  | 4.642 | 4.253 |
| 0.346 | 0.541 | -5.295 | -0.238 | 5.369 | 5.607 |
| 0.789 | 0.880 | -5.681 | -0.199 | 2.831 | 3.030 |
| 0.804 | 0.890 | -5.686 | 0.066  | 6.406 | 6.340 |
| 0.509 | 0.677 | -5.508 | -0.286 | 1.907 | 2.194 |
| 0.035 | 0.186 | -3.621 | 0.772  | 3.244 | 2.472 |
| 0.587 | 0.740 | -5.575 | 0.163  | 5.495 | 5.332 |
| 0.069 | 0.236 | -4.162 | 0.616  | 6.570 | 5.954 |
| 0.109 | 0.288 | -4.506 | -0.528 | 6.259 | 6.787 |
| 0.257 | 0.454 | -5.107 | 0.328  | 4.057 | 3.730 |
| 0.029 | 0.178 | -3.476 | 0.735  | 4.314 | 3.579 |
| 0.960 | 0.979 | -5.714 | -0.013 | 4.320 | 4.333 |
| 0.306 | 0.504 | -5.220 | -0.468 | 5.832 | 6.301 |
| 0.046 | 0.203 | -3.844 | 1.003  | 3.922 | 2.919 |
| 0.336 | 0.532 | -5.277 | -0.284 | 2.861 | 3.145 |
| 0.124 | 0.305 | -4.600 | -0.360 | 3.279 | 3.638 |
| 0.943 | 0.969 | -5.712 | -0.025 | 5.311 | 5.336 |
| 0.118 | 0.298 | -4.562 | 0.411  | 4.549 | 4.138 |
| 0.091 | 0.267 | -4.371 | -0.564 | 3.776 | 4.341 |
| 0.340 | 0.535 | -5.283 | 0.229  | 6.200 | 5.971 |
| 0.016 | 0.162 | -3.012 | 1.095  | 3.103 | 2.007 |
| 0.933 | 0.964 | -5.711 | 0.019  | 5.020 | 5.002 |
| 0.021 | 0.168 | -3.208 | 0.655  | 4.998 | 4.343 |
| 0.799 | 0.887 | -5.684 | 0.069  | 4.086 | 4.017 |
| 0.627 | 0.769 | -5.603 | -0.157 | 3.104 | 3.261 |
| 0.117 | 0.297 | -4.556 | 0.820  | 6.965 | 6.145 |

|       |       |        |        |       |       |
|-------|-------|--------|--------|-------|-------|
| 0.407 | 0.594 | -5.389 | -0.433 | 3.848 | 4.281 |
| 0.051 | 0.209 | -3.926 | 0.446  | 4.225 | 3.779 |
| 0.038 | 0.192 | -3.703 | 1.068  | 5.534 | 4.466 |
| 0.014 | 0.160 | -2.888 | -0.675 | 3.858 | 4.533 |
| 0.024 | 0.173 | -3.321 | 0.761  | 5.856 | 5.094 |
| 0.879 | 0.934 | -5.704 | 0.035  | 4.075 | 4.039 |
| 0.371 | 0.561 | -5.335 | -0.359 | 2.050 | 2.409 |
| 0.068 | 0.234 | -4.146 | -1.486 | 1.949 | 3.435 |
| 0.013 | 0.160 | -2.864 | 0.578  | 3.631 | 3.053 |
| 0.345 | 0.540 | -5.294 | 0.235  | 3.278 | 3.043 |
| 0.052 | 0.211 | -3.938 | -0.559 | 2.273 | 2.832 |
| 0.065 | 0.229 | -4.119 | 0.453  | 7.224 | 6.772 |
| 0.004 | 0.157 | -1.914 | 0.759  | 3.052 | 2.293 |
| 0.592 | 0.744 | -5.579 | 0.170  | 4.427 | 4.257 |
| 0.171 | 0.361 | -4.832 | 0.333  | 3.507 | 3.174 |
| 0.873 | 0.931 | -5.703 | -0.053 | 2.566 | 2.619 |
| 0.210 | 0.404 | -4.972 | -0.448 | 3.915 | 4.363 |
| 0.043 | 0.199 | -3.788 | -1.163 | 6.608 | 7.770 |
| 0.157 | 0.344 | -4.768 | 0.381  | 7.537 | 7.156 |
| 0.136 | 0.320 | -4.669 | 0.488  | 6.008 | 5.520 |
| 0.137 | 0.321 | -4.674 | 0.649  | 4.585 | 3.936 |
| 0.866 | 0.928 | -5.701 | 0.036  | 6.798 | 6.762 |
| 0.582 | 0.736 | -5.571 | -0.137 | 2.911 | 3.048 |
| 0.383 | 0.572 | -5.355 | 0.190  | 4.453 | 4.263 |
| 0.041 | 0.195 | -3.753 | -0.551 | 5.738 | 6.289 |
| 0.111 | 0.290 | -4.518 | -0.589 | 2.864 | 3.453 |
| 0.043 | 0.200 | -3.797 | 0.617  | 7.068 | 6.451 |
| 0.516 | 0.683 | -5.515 | 0.175  | 2.885 | 2.710 |
| 0.040 | 0.194 | -3.732 | -0.541 | 5.400 | 5.941 |
| 0.452 | 0.633 | -5.447 | 0.182  | 1.821 | 1.639 |
| 0.010 | 0.157 | -2.600 | -1.123 | 7.325 | 8.448 |
| 0.007 | 0.157 | -2.378 | 1.754  | 6.424 | 4.670 |
| 0.194 | 0.388 | -4.920 | -0.309 | 9.255 | 9.564 |
| 0.452 | 0.632 | -5.447 | 0.246  | 3.414 | 3.168 |
| 0.004 | 0.157 | -1.889 | 1.008  | 4.479 | 3.472 |
| 0.309 | 0.506 | -5.226 | -0.229 | 2.096 | 2.325 |
| 0.108 | 0.287 | -4.501 | -0.427 | 2.526 | 2.953 |
| 0.058 | 0.219 | -4.024 | -0.430 | 5.013 | 5.443 |
| 0.241 | 0.439 | -5.066 | 0.427  | 6.228 | 5.802 |
| 0.260 | 0.457 | -5.115 | 0.251  | 8.640 | 8.389 |
| 0.537 | 0.700 | -5.534 | -0.186 | 3.019 | 3.205 |
| 0.683 | 0.810 | -5.636 | 0.135  | 5.810 | 5.675 |
| 0.013 | 0.160 | -2.840 | -1.010 | 6.177 | 7.188 |
| 0.145 | 0.329 | -4.714 | -0.418 | 4.080 | 4.497 |
| 0.635 | 0.774 | -5.608 | 0.106  | 4.559 | 4.453 |
| 0.888 | 0.939 | -5.705 | -0.037 | 4.239 | 4.276 |
| 0.054 | 0.215 | -3.975 | 0.443  | 6.046 | 5.603 |
| 0.863 | 0.927 | -5.701 | 0.049  | 6.784 | 6.735 |
| 0.145 | 0.329 | -4.716 | 0.377  | 9.180 | 8.802 |
| 0.193 | 0.386 | -4.914 | -0.484 | 3.279 | 3.763 |

|       |       |        |        |       |       |
|-------|-------|--------|--------|-------|-------|
| 0.050 | 0.208 | -3.909 | 0.867  | 9.485 | 8.618 |
| 0.011 | 0.157 | -2.665 | 0.781  | 8.694 | 7.914 |
| 0.027 | 0.176 | -3.427 | 0.656  | 5.405 | 4.749 |
| 0.865 | 0.928 | -5.701 | 0.042  | 5.902 | 5.861 |
| 0.026 | 0.176 | -3.394 | 0.656  | 6.426 | 5.770 |
| 0.015 | 0.160 | -2.957 | -0.716 | 3.457 | 4.173 |
| 0.513 | 0.681 | -5.513 | -0.159 | 3.584 | 3.744 |
| 0.031 | 0.181 | -3.538 | 0.527  | 4.394 | 3.867 |
| 0.282 | 0.480 | -5.167 | -0.590 | 3.688 | 4.278 |
| 0.756 | 0.859 | -5.669 | -0.130 | 4.422 | 4.551 |
| 0.019 | 0.164 | -3.128 | 1.039  | 5.880 | 4.840 |
| 0.040 | 0.194 | -3.736 | -0.446 | 6.835 | 7.281 |
| 0.183 | 0.374 | -4.877 | -0.359 | 1.967 | 2.325 |
| 0.107 | 0.286 | -4.492 | 0.432  | 5.432 | 5.000 |
| 0.017 | 0.162 | -3.068 | -0.704 | 7.759 | 8.463 |
| 0.016 | 0.162 | -2.987 | -0.636 | 7.181 | 7.817 |
| 0.124 | 0.305 | -4.598 | 0.441  | 7.045 | 6.603 |
| 0.013 | 0.160 | -2.865 | -0.712 | 5.042 | 5.754 |
| 0.007 | 0.157 | -2.384 | -0.798 | 7.456 | 8.255 |
| 0.160 | 0.349 | -4.786 | 1.084  | 7.948 | 6.864 |
| 0.489 | 0.664 | -5.488 | -0.154 | 4.380 | 4.534 |
| 0.016 | 0.162 | -3.025 | 0.724  | 6.491 | 5.767 |
| 0.689 | 0.814 | -5.639 | 0.149  | 2.568 | 2.419 |
| 0.012 | 0.160 | -2.767 | 0.857  | 4.890 | 4.033 |
| 0.129 | 0.310 | -4.628 | 0.308  | 5.263 | 4.955 |
| 0.255 | 0.452 | -5.103 | -0.305 | 2.408 | 2.712 |
| 0.416 | 0.603 | -5.401 | 0.199  | 4.382 | 4.183 |
| 0.840 | 0.912 | -5.696 | 0.061  | 4.148 | 4.086 |
| 0.044 | 0.201 | -3.814 | 0.772  | 6.858 | 6.086 |
| 0.029 | 0.178 | -3.475 | 0.562  | 6.815 | 6.254 |
| 0.021 | 0.168 | -3.228 | -0.536 | 5.639 | 6.174 |
| 0.837 | 0.909 | -5.695 | -0.047 | 4.512 | 4.558 |
| 0.038 | 0.191 | -3.686 | 0.580  | 5.584 | 5.004 |
| 0.306 | 0.504 | -5.220 | -0.296 | 3.527 | 3.823 |
| 0.003 | 0.157 | -1.680 | 0.739  | 6.361 | 5.622 |
| 0.866 | 0.928 | -5.701 | -0.049 | 2.385 | 2.434 |
| 0.097 | 0.274 | -4.421 | 0.548  | 3.938 | 3.391 |
| 0.020 | 0.167 | -3.179 | -0.961 | 4.178 | 5.139 |
| 0.109 | 0.288 | -4.504 | 0.726  | 4.935 | 4.209 |
| 0.057 | 0.219 | -4.018 | -0.408 | 7.329 | 7.737 |
| 0.189 | 0.381 | -4.899 | -0.331 | 6.323 | 6.654 |
| 0.610 | 0.757 | -5.592 | -0.141 | 2.248 | 2.389 |
| 0.046 | 0.203 | -3.849 | 0.551  | 6.669 | 6.118 |
| 0.039 | 0.192 | -3.712 | 0.499  | 6.235 | 5.736 |
| 0.007 | 0.157 | -2.353 | 1.899  | 5.307 | 3.408 |
| 0.380 | 0.569 | -5.350 | -0.316 | 3.983 | 4.299 |
| 0.115 | 0.295 | -4.544 | 0.727  | 6.552 | 5.824 |
| 0.037 | 0.191 | -3.682 | 0.644  | 8.640 | 7.996 |
| 0.018 | 0.162 | -3.083 | 0.678  | 5.490 | 4.813 |
| 0.156 | 0.344 | -4.767 | 0.429  | 4.509 | 4.080 |

|       |       |        |        |       |       |
|-------|-------|--------|--------|-------|-------|
| 0.064 | 0.228 | -4.101 | -0.494 | 7.259 | 7.753 |
| 0.012 | 0.160 | -2.786 | 0.804  | 4.999 | 4.195 |
| 0.515 | 0.682 | -5.515 | -0.189 | 2.474 | 2.663 |
| 0.265 | 0.462 | -5.127 | -0.221 | 2.864 | 3.085 |
| 0.346 | 0.541 | -5.295 | 0.345  | 3.304 | 2.958 |
| 0.029 | 0.178 | -3.472 | -0.538 | 5.408 | 5.945 |
| 0.457 | 0.637 | -5.453 | -0.213 | 2.020 | 2.233 |
| 0.084 | 0.256 | -4.313 | 0.531  | 5.609 | 5.078 |
| 0.057 | 0.218 | -4.008 | -0.457 | 3.236 | 3.693 |
| 0.034 | 0.186 | -3.618 | 0.556  | 4.633 | 4.077 |
| 0.525 | 0.691 | -5.524 | 0.143  | 5.543 | 5.400 |
| 0.079 | 0.249 | -4.259 | -0.681 | 3.013 | 3.695 |
| 0.005 | 0.157 | -1.987 | -1.718 | 3.104 | 4.822 |
| 0.110 | 0.289 | -4.511 | 0.353  | 5.658 | 5.305 |
| 0.139 | 0.324 | -4.685 | -0.352 | 6.337 | 6.689 |
| 0.670 | 0.802 | -5.629 | 0.084  | 6.330 | 6.246 |
| 0.281 | 0.479 | -5.166 | 0.302  | 7.376 | 7.074 |
| 0.034 | 0.185 | -3.615 | 0.957  | 4.101 | 3.144 |
| 0.889 | 0.940 | -5.706 | -0.049 | 3.566 | 3.614 |
| 0.754 | 0.858 | -5.668 | 0.099  | 5.293 | 5.195 |
| 0.367 | 0.558 | -5.329 | -0.221 | 5.164 | 5.385 |
| 0.999 | 0.999 | -5.715 | 0.000  | 2.306 | 2.306 |
| 0.252 | 0.450 | -5.096 | 0.446  | 5.444 | 4.998 |
| 0.015 | 0.161 | -2.975 | 0.728  | 7.317 | 6.589 |
| 0.910 | 0.952 | -5.709 | 0.040  | 3.314 | 3.274 |
| 0.035 | 0.188 | -3.641 | 0.731  | 4.787 | 4.056 |
| 0.003 | 0.157 | -1.617 | 2.462  | 5.841 | 3.378 |
| 0.417 | 0.604 | -5.403 | -0.181 | 6.838 | 7.019 |
| 0.125 | 0.306 | -4.607 | 0.397  | 6.047 | 5.650 |
| 0.225 | 0.421 | -5.019 | -0.499 | 3.787 | 4.286 |
| 0.062 | 0.225 | -4.081 | 0.503  | 5.390 | 4.886 |
| 0.009 | 0.157 | -2.500 | -0.738 | 3.829 | 4.567 |
| 0.722 | 0.836 | -5.655 | -0.079 | 4.505 | 4.585 |
| 0.004 | 0.157 | -1.935 | 1.160  | 6.663 | 5.502 |
| 0.080 | 0.250 | -4.269 | 0.541  | 3.365 | 2.824 |
| 0.106 | 0.284 | -4.486 | 0.362  | 5.505 | 5.143 |
| 0.140 | 0.324 | -4.686 | -0.406 | 2.227 | 2.634 |
| 0.084 | 0.256 | -4.313 | 0.508  | 5.585 | 5.077 |
| 0.021 | 0.168 | -3.217 | 0.677  | 8.019 | 7.342 |
| 0.420 | 0.606 | -5.407 | -0.244 | 3.310 | 3.554 |
| 0.120 | 0.300 | -4.575 | -0.404 | 4.062 | 4.465 |
| 0.465 | 0.644 | -5.462 | -0.218 | 3.948 | 4.166 |
| 0.054 | 0.215 | -3.972 | -0.462 | 5.844 | 6.306 |
| 0.038 | 0.192 | -3.703 | 0.588  | 5.940 | 5.352 |
| 0.093 | 0.268 | -4.384 | 0.331  | 7.017 | 6.686 |
| 0.002 | 0.157 | -1.468 | 0.924  | 6.909 | 5.985 |
| 0.709 | 0.827 | -5.649 | 0.101  | 2.641 | 2.540 |
| 0.039 | 0.193 | -3.715 | 0.411  | 6.187 | 5.777 |
| 0.763 | 0.864 | -5.672 | 0.158  | 2.885 | 2.726 |
| 0.004 | 0.157 | -1.947 | 1.403  | 6.181 | 4.779 |



|       |       |        |        |       |       |
|-------|-------|--------|--------|-------|-------|
| 0.084 | 0.256 | -4.312 | 0.411  | 7.340 | 6.929 |
| 0.022 | 0.171 | -3.261 | 1.888  | 8.004 | 6.116 |
| 0.043 | 0.200 | -3.799 | 0.677  | 5.952 | 5.275 |
| 0.218 | 0.412 | -4.997 | 0.427  | 4.947 | 4.520 |
| 0.010 | 0.157 | -2.615 | -0.867 | 6.853 | 7.720 |
| 0.001 | 0.157 | -0.558 | -1.144 | 3.138 | 4.282 |
| 0.427 | 0.613 | -5.417 | 0.267  | 4.578 | 4.311 |
| 0.221 | 0.417 | -5.008 | -0.400 | 2.619 | 3.018 |
| 0.021 | 0.168 | -3.215 | 1.433  | 4.165 | 2.732 |
| 0.812 | 0.894 | -5.688 | 0.068  | 2.992 | 2.924 |
| 0.046 | 0.203 | -3.837 | 0.644  | 5.211 | 4.568 |
| 0.248 | 0.446 | -5.084 | -0.479 | 5.027 | 5.506 |
| 0.169 | 0.359 | -4.820 | 0.286  | 5.488 | 5.202 |
| 0.109 | 0.288 | -4.502 | -0.492 | 5.761 | 6.252 |
| 0.188 | 0.380 | -4.896 | 0.405  | 3.990 | 3.586 |
| 0.818 | 0.897 | -5.690 | 0.063  | 2.897 | 2.833 |
| 0.543 | 0.705 | -5.540 | 0.137  | 5.595 | 5.459 |
| 0.979 | 0.989 | -5.714 | 0.007  | 4.221 | 4.215 |
| 0.083 | 0.255 | -4.302 | -0.458 | 3.004 | 3.462 |
| 0.285 | 0.483 | -5.175 | -0.276 | 4.484 | 4.761 |
| 0.961 | 0.980 | -5.714 | 0.010  | 3.581 | 3.571 |
| 0.495 | 0.667 | -5.494 | 0.147  | 6.239 | 6.092 |
| 0.147 | 0.332 | -4.725 | -0.390 | 7.873 | 8.263 |
| 0.096 | 0.272 | -4.412 | 0.585  | 4.377 | 3.792 |
| 0.508 | 0.677 | -5.508 | 0.151  | 2.582 | 2.432 |
| 0.271 | 0.469 | -5.142 | 0.253  | 5.713 | 5.460 |
| 0.449 | 0.631 | -5.444 | -0.304 | 2.931 | 3.235 |
| 0.005 | 0.157 | -2.024 | 1.041  | 5.235 | 4.195 |
| 0.094 | 0.271 | -4.398 | 0.527  | 4.306 | 3.778 |
| 0.641 | 0.779 | -5.612 | -0.162 | 2.073 | 2.235 |
| 0.867 | 0.928 | -5.702 | 0.046  | 3.042 | 2.995 |
| 0.500 | 0.671 | -5.500 | -0.185 | 3.600 | 3.784 |
| 0.336 | 0.532 | -5.278 | 0.237  | 4.165 | 3.928 |
| 0.038 | 0.192 | -3.690 | 1.073  | 7.811 | 6.738 |
| 0.639 | 0.777 | -5.610 | 0.119  | 3.425 | 3.306 |
| 0.832 | 0.906 | -5.693 | 0.054  | 3.854 | 3.800 |
| 0.523 | 0.689 | -5.522 | -0.139 | 4.254 | 4.393 |
| 0.041 | 0.195 | -3.753 | 0.473  | 6.685 | 6.212 |
| 0.375 | 0.565 | -5.343 | 0.261  | 5.057 | 4.796 |
| 0.008 | 0.157 | -2.457 | 1.502  | 6.446 | 4.943 |
| 0.800 | 0.888 | -5.684 | 0.081  | 2.344 | 2.263 |
| 0.289 | 0.488 | -5.184 | -0.381 | 2.631 | 3.012 |
| 0.052 | 0.211 | -3.938 | -0.583 | 2.876 | 3.459 |
| 0.097 | 0.274 | -4.418 | -0.691 | 4.090 | 4.781 |
| 0.210 | 0.405 | -4.974 | -0.460 | 1.290 | 1.750 |
| 0.042 | 0.196 | -3.766 | -0.545 | 4.591 | 5.136 |
| 0.522 | 0.688 | -5.520 | 0.190  | 3.192 | 3.002 |
| 0.215 | 0.410 | -4.990 | 0.278  | 5.708 | 5.431 |
| 0.055 | 0.216 | -3.989 | -0.958 | 3.658 | 4.616 |
| 0.209 | 0.404 | -4.971 | -0.349 | 5.392 | 5.741 |

|       |       |        |        |       |       |
|-------|-------|--------|--------|-------|-------|
| 0.034 | 0.184 | -3.600 | 0.545  | 4.503 | 3.958 |
| 0.228 | 0.424 | -5.027 | -0.308 | 4.272 | 4.580 |
| 0.506 | 0.675 | -5.505 | 0.273  | 5.001 | 4.728 |
| 0.932 | 0.963 | -5.711 | 0.020  | 4.693 | 4.672 |
| 0.872 | 0.931 | -5.703 | 0.042  | 3.864 | 3.821 |
| 0.458 | 0.638 | -5.454 | 0.189  | 4.479 | 4.290 |
| 0.466 | 0.645 | -5.463 | 0.186  | 4.506 | 4.320 |
| 0.008 | 0.157 | -2.426 | 1.123  | 5.586 | 4.463 |
| 0.064 | 0.227 | -4.098 | -0.626 | 3.466 | 4.092 |
| 0.982 | 0.990 | -5.715 | 0.006  | 3.156 | 3.150 |
| 0.403 | 0.591 | -5.384 | 0.164  | 6.611 | 6.446 |
| 0.026 | 0.176 | -3.408 | 0.645  | 5.892 | 5.247 |
| 0.011 | 0.157 | -2.704 | -0.717 | 6.059 | 6.775 |
| 0.704 | 0.824 | -5.646 | 0.092  | 6.139 | 6.048 |
| 0.140 | 0.324 | -4.690 | -0.408 | 4.119 | 4.528 |
| 0.470 | 0.649 | -5.468 | -0.266 | 2.897 | 3.163 |
| 0.569 | 0.725 | -5.561 | -0.158 | 2.520 | 2.678 |
| 0.321 | 0.518 | -5.249 | -0.273 | 2.348 | 2.620 |
| 0.017 | 0.162 | -3.070 | -0.883 | 2.089 | 2.972 |
| 0.101 | 0.278 | -4.445 | 0.372  | 5.606 | 5.234 |
| 0.293 | 0.491 | -5.193 | -0.472 | 3.866 | 4.338 |
| 0.428 | 0.614 | -5.417 | -0.225 | 2.299 | 2.524 |
| 0.840 | 0.911 | -5.695 | 0.067  | 2.266 | 2.199 |
| 0.318 | 0.516 | -5.244 | 0.289  | 3.765 | 3.476 |
| 0.420 | 0.606 | -5.407 | -0.366 | 2.655 | 3.021 |
| 0.766 | 0.865 | -5.673 | -0.118 | 3.355 | 3.473 |
| 0.827 | 0.902 | -5.692 | -0.074 | 4.331 | 4.405 |
| 0.007 | 0.157 | -2.310 | 1.530  | 6.783 | 5.253 |
| 0.321 | 0.518 | -5.250 | -0.500 | 3.393 | 3.893 |
| 0.106 | 0.284 | -4.482 | -0.542 | 3.057 | 3.599 |
| 0.572 | 0.727 | -5.564 | -0.209 | 3.387 | 3.596 |
| 0.309 | 0.506 | -5.225 | 0.348  | 2.742 | 2.394 |
| 0.473 | 0.652 | -5.471 | 0.231  | 3.455 | 3.224 |
| 0.709 | 0.827 | -5.649 | 0.100  | 3.071 | 2.971 |
| 0.976 | 0.988 | -5.714 | -0.008 | 4.729 | 4.737 |
| 0.598 | 0.748 | -5.583 | 0.224  | 4.163 | 3.939 |
| 0.519 | 0.686 | -5.518 | -0.207 | 6.428 | 6.636 |
| 0.919 | 0.957 | -5.710 | -0.032 | 3.195 | 3.227 |
| 0.009 | 0.157 | -2.529 | 0.832  | 3.812 | 2.980 |
| 0.992 | 0.996 | -5.715 | 0.003  | 2.489 | 2.486 |
| 0.104 | 0.281 | -4.469 | 0.447  | 3.441 | 2.994 |
| 0.126 | 0.306 | -4.609 | 0.566  | 2.742 | 2.177 |
| 0.700 | 0.821 | -5.644 | 0.142  | 2.474 | 2.332 |
| 0.133 | 0.316 | -4.652 | -0.654 | 2.563 | 3.217 |
| 0.859 | 0.924 | -5.700 | 0.051  | 3.008 | 2.957 |
| 0.138 | 0.321 | -4.676 | -0.361 | 3.585 | 3.946 |
| 0.724 | 0.837 | -5.656 | -0.187 | 2.410 | 2.597 |
| 0.063 | 0.227 | -4.095 | -0.587 | 4.498 | 5.085 |
| 0.503 | 0.673 | -5.503 | -0.300 | 3.006 | 3.306 |
| 0.578 | 0.732 | -5.568 | 0.162  | 2.996 | 2.834 |

|       |       |        |        |       |       |
|-------|-------|--------|--------|-------|-------|
| 0.958 | 0.978 | -5.713 | -0.014 | 3.942 | 3.956 |
| 0.414 | 0.601 | -5.399 | -0.253 | 2.300 | 2.553 |
| 0.914 | 0.954 | -5.709 | -0.028 | 3.828 | 3.856 |
| 0.595 | 0.746 | -5.581 | 0.157  | 3.771 | 3.614 |
| 0.426 | 0.612 | -5.415 | 0.277  | 2.950 | 2.673 |
| 0.722 | 0.836 | -5.655 | 0.128  | 5.241 | 5.113 |
| 0.494 | 0.667 | -5.493 | -0.287 | 2.530 | 2.817 |
| 0.306 | 0.503 | -5.219 | -0.546 | 4.552 | 5.098 |
| 0.108 | 0.287 | -4.497 | -0.559 | 2.809 | 3.368 |
| 0.397 | 0.585 | -5.375 | -0.233 | 2.266 | 2.499 |
| 0.014 | 0.160 | -2.922 | 0.624  | 3.729 | 3.105 |
| 0.448 | 0.630 | -5.443 | -0.270 | 3.163 | 3.432 |
| 0.009 | 0.157 | -2.574 | 0.718  | 2.502 | 1.783 |
| 0.104 | 0.281 | -4.467 | 0.535  | 2.512 | 1.977 |
| 0.229 | 0.426 | -5.031 | 0.364  | 2.928 | 2.565 |
| 0.726 | 0.839 | -5.657 | 0.146  | 2.638 | 2.493 |
| 0.792 | 0.882 | -5.682 | -0.103 | 4.043 | 4.146 |
| 0.395 | 0.582 | -5.373 | 0.243  | 2.805 | 2.562 |
| 0.171 | 0.361 | -4.829 | -0.575 | 3.949 | 4.524 |
| 0.110 | 0.289 | -4.512 | -0.430 | 2.522 | 2.952 |
| 0.412 | 0.599 | -5.396 | -0.315 | 2.110 | 2.425 |
| 0.317 | 0.515 | -5.242 | 0.391  | 3.598 | 3.207 |
| 0.017 | 0.162 | -3.035 | -0.753 | 2.131 | 2.884 |
| 0.241 | 0.438 | -5.065 | 0.437  | 4.493 | 4.056 |
| 0.531 | 0.695 | -5.529 | 0.229  | 1.387 | 1.159 |
| 0.565 | 0.722 | -5.558 | 0.152  | 3.341 | 3.189 |
| 0.673 | 0.803 | -5.630 | -0.146 | 2.624 | 2.770 |
| 0.563 | 0.721 | -5.557 | -0.208 | 2.885 | 3.093 |
| 0.492 | 0.666 | -5.492 | -0.191 | 2.913 | 3.104 |
| 0.287 | 0.485 | -5.179 | -0.279 | 4.350 | 4.629 |
| 0.600 | 0.749 | -5.584 | 0.143  | 3.437 | 3.295 |
| 0.740 | 0.849 | -5.663 | -0.119 | 2.526 | 2.645 |
| 0.846 | 0.915 | -5.697 | 0.060  | 3.433 | 3.373 |
| 0.913 | 0.953 | -5.709 | 0.030  | 3.408 | 3.378 |
| 0.025 | 0.174 | -3.349 | 0.876  | 3.845 | 2.969 |
| 0.064 | 0.228 | -4.106 | 0.560  | 3.281 | 2.721 |
| 0.671 | 0.802 | -5.629 | -0.124 | 3.505 | 3.630 |
| 0.027 | 0.177 | -3.435 | -0.677 | 3.639 | 4.315 |
| 0.216 | 0.411 | -4.992 | -0.388 | 3.346 | 3.734 |
| 0.520 | 0.686 | -5.518 | -0.206 | 3.680 | 3.886 |
| 0.304 | 0.502 | -5.215 | 0.401  | 3.643 | 3.242 |
| 0.876 | 0.933 | -5.703 | 0.050  | 4.690 | 4.639 |
| 0.046 | 0.203 | -3.842 | 0.641  | 2.632 | 1.991 |
| 0.145 | 0.329 | -4.715 | -0.565 | 2.585 | 3.150 |
| 0.903 | 0.947 | -5.708 | 0.039  | 3.709 | 3.670 |
| 0.070 | 0.237 | -4.172 | 0.445  | 4.566 | 4.121 |
| 0.847 | 0.915 | -5.697 | -0.069 | 2.890 | 2.959 |
| 0.090 | 0.265 | -4.366 | -0.472 | 2.907 | 3.379 |
| 0.205 | 0.401 | -4.957 | -0.405 | 2.350 | 2.755 |
| 0.679 | 0.808 | -5.633 | 0.133  | 3.348 | 3.215 |

|       |       |        |        |       |       |
|-------|-------|--------|--------|-------|-------|
| 0.235 | 0.432 | -5.048 | -0.345 | 2.323 | 2.669 |
| 0.863 | 0.927 | -5.701 | 0.047  | 5.497 | 5.450 |
| 0.431 | 0.616 | -5.422 | -0.243 | 1.898 | 2.140 |
| 0.550 | 0.710 | -5.545 | 0.156  | 2.475 | 2.320 |
| 0.988 | 0.994 | -5.715 | -0.004 | 3.580 | 3.584 |
| 0.344 | 0.539 | -5.291 | -0.296 | 2.380 | 2.676 |
| 0.308 | 0.505 | -5.223 | -0.349 | 3.389 | 3.738 |
| 0.168 | 0.358 | -4.819 | -0.599 | 4.638 | 5.237 |
| 0.639 | 0.778 | -5.610 | -0.147 | 4.095 | 4.242 |
| 0.043 | 0.199 | -3.791 | 0.958  | 3.499 | 2.541 |
| 0.145 | 0.329 | -4.712 | -0.495 | 2.162 | 2.657 |
| 0.887 | 0.938 | -5.705 | 0.036  | 2.943 | 2.908 |
| 0.704 | 0.824 | -5.646 | 0.109  | 2.513 | 2.405 |
| 0.183 | 0.374 | -4.877 | 0.441  | 4.194 | 3.754 |
| 0.920 | 0.957 | -5.710 | -0.028 | 1.825 | 1.853 |
| 0.738 | 0.848 | -5.662 | -0.110 | 5.652 | 5.761 |
| 0.537 | 0.700 | -5.534 | 0.191  | 3.640 | 3.448 |
| 0.943 | 0.970 | -5.712 | -0.029 | 2.364 | 2.393 |
| 0.355 | 0.550 | -5.311 | -0.426 | 2.484 | 2.910 |
| 0.190 | 0.383 | -4.906 | -0.428 | 2.716 | 3.144 |
| 0.375 | 0.565 | -5.342 | -0.407 | 1.699 | 2.106 |
| 0.148 | 0.333 | -4.729 | -0.458 | 2.227 | 2.684 |
| 0.278 | 0.477 | -5.159 | -0.297 | 2.383 | 2.680 |
| 0.887 | 0.938 | -5.705 | -0.048 | 3.394 | 3.442 |
| 0.394 | 0.581 | -5.371 | 0.324  | 3.903 | 3.578 |
| 0.555 | 0.715 | -5.550 | -0.176 | 1.516 | 1.692 |
| 0.514 | 0.682 | -5.513 | -0.216 | 4.703 | 4.918 |
| 0.063 | 0.226 | -4.085 | -1.017 | 3.681 | 4.699 |
| 0.024 | 0.173 | -3.332 | -1.118 | 1.422 | 2.540 |
| 0.434 | 0.618 | -5.425 | 0.239  | 6.594 | 6.355 |
| 0.300 | 0.497 | -5.206 | -0.437 | 5.725 | 6.162 |
| 0.173 | 0.362 | -4.837 | -0.464 | 2.547 | 3.012 |
| 0.245 | 0.442 | -5.075 | -0.328 | 3.584 | 3.912 |
| 0.209 | 0.404 | -4.970 | -0.337 | 3.111 | 3.448 |
| 0.515 | 0.682 | -5.514 | -0.207 | 2.395 | 2.602 |
| 0.518 | 0.685 | -5.517 | 0.187  | 3.996 | 3.810 |
| 0.771 | 0.868 | -5.675 | -0.106 | 2.503 | 2.608 |
| 0.009 | 0.157 | -2.514 | 1.138  | 3.737 | 2.599 |
| 0.039 | 0.192 | -3.708 | 0.760  | 3.684 | 2.923 |
| 0.228 | 0.425 | -5.029 | 0.417  | 2.946 | 2.529 |
| 0.747 | 0.853 | -5.666 | 0.127  | 3.923 | 3.796 |
| 0.816 | 0.896 | -5.689 | -0.105 | 3.050 | 3.155 |
| 0.120 | 0.301 | -4.579 | 0.691  | 3.620 | 2.929 |
| 0.854 | 0.921 | -5.699 | 0.072  | 2.447 | 2.376 |
| 0.192 | 0.385 | -4.913 | -0.354 | 5.937 | 6.290 |
| 0.503 | 0.672 | -5.502 | 0.365  | 3.220 | 2.855 |
| 0.807 | 0.891 | -5.686 | -0.062 | 4.767 | 4.830 |
| 0.092 | 0.268 | -4.382 | -0.604 | 6.379 | 6.983 |
| 0.036 | 0.188 | -3.645 | -0.589 | 2.939 | 3.527 |
| 0.198 | 0.392 | -4.933 | -0.498 | 3.338 | 3.835 |

|       |       |        |        |       |       |
|-------|-------|--------|--------|-------|-------|
| 0.994 | 0.997 | -5.715 | -0.003 | 2.570 | 2.572 |
| 0.950 | 0.974 | -5.713 | 0.020  | 2.060 | 2.040 |
| 0.529 | 0.694 | -5.527 | -0.219 | 2.788 | 3.007 |
| 0.521 | 0.687 | -5.519 | -0.240 | 1.033 | 1.273 |
| 0.526 | 0.691 | -5.524 | -0.156 | 4.638 | 4.794 |
| 0.185 | 0.377 | -4.886 | -0.457 | 4.140 | 4.597 |
| 0.632 | 0.772 | -5.606 | -0.145 | 2.934 | 3.079 |
| 0.542 | 0.703 | -5.538 | -0.210 | 2.595 | 2.805 |
| 0.066 | 0.231 | -4.128 | 0.575  | 4.998 | 4.422 |
| 0.007 | 0.157 | -2.374 | 1.106  | 2.629 | 1.524 |
| 0.073 | 0.241 | -4.199 | -0.651 | 2.004 | 2.655 |
| 0.971 | 0.985 | -5.714 | -0.015 | 3.707 | 3.722 |
| 0.656 | 0.791 | -5.621 | -0.221 | 3.368 | 3.590 |
| 0.533 | 0.696 | -5.531 | -0.270 | 2.335 | 2.605 |
| 0.526 | 0.692 | -5.525 | 0.168  | 3.950 | 3.782 |
| 0.842 | 0.912 | -5.696 | -0.072 | 3.441 | 3.513 |
| 0.011 | 0.158 | -2.706 | -0.661 | 1.952 | 2.613 |
| 0.590 | 0.743 | -5.578 | -0.178 | 2.008 | 2.186 |
| 0.569 | 0.725 | -5.561 | 0.164  | 2.758 | 2.594 |
| 0.280 | 0.478 | -5.163 | 0.305  | 3.099 | 2.794 |
| 0.933 | 0.964 | -5.711 | 0.035  | 3.077 | 3.042 |
| 0.126 | 0.307 | -4.614 | 0.524  | 2.610 | 2.085 |
| 0.984 | 0.991 | -5.715 | 0.005  | 4.353 | 4.348 |
| 0.196 | 0.390 | -4.926 | 0.335  | 3.064 | 2.729 |
| 0.930 | 0.962 | -5.711 | 0.025  | 3.507 | 3.482 |
| 0.291 | 0.489 | -5.188 | 0.330  | 4.001 | 3.672 |
| 0.208 | 0.402 | -4.965 | -0.627 | 2.398 | 3.025 |
| 0.293 | 0.491 | -5.192 | -0.457 | 2.978 | 3.434 |
| 0.489 | 0.664 | -5.488 | -0.284 | 3.060 | 3.344 |
| 0.991 | 0.995 | -5.715 | -0.004 | 2.550 | 2.554 |
| 0.012 | 0.160 | -2.795 | -1.328 | 4.338 | 5.667 |
| 0.888 | 0.939 | -5.705 | -0.041 | 2.748 | 2.790 |
| 0.977 | 0.988 | -5.714 | 0.011  | 3.197 | 3.186 |
| 0.232 | 0.428 | -5.039 | -0.345 | 2.156 | 2.501 |
| 0.181 | 0.372 | -4.869 | -0.473 | 6.040 | 6.513 |
| 0.224 | 0.421 | -5.017 | -0.330 | 3.827 | 4.158 |
| 0.385 | 0.574 | -5.358 | -0.246 | 2.586 | 2.832 |
| 0.475 | 0.653 | -5.474 | -0.183 | 4.504 | 4.687 |
| 0.009 | 0.157 | -2.541 | -1.056 | 4.178 | 5.234 |
| 0.037 | 0.190 | -3.680 | -0.948 | 1.999 | 2.947 |
| 0.532 | 0.695 | -5.529 | -0.261 | 4.001 | 4.262 |
| 0.123 | 0.304 | -4.596 | 0.396  | 2.589 | 2.192 |
| 0.641 | 0.779 | -5.612 | 0.142  | 3.001 | 2.860 |
| 0.563 | 0.721 | -5.556 | -0.159 | 3.892 | 4.051 |
| 0.048 | 0.205 | -3.881 | 0.745  | 6.239 | 5.494 |
| 0.028 | 0.178 | -3.454 | -0.786 | 2.357 | 3.144 |
| 0.777 | 0.872 | -5.677 | -0.110 | 2.709 | 2.819 |
| 0.599 | 0.749 | -5.584 | 0.181  | 3.366 | 3.185 |
| 0.045 | 0.201 | -3.820 | 0.750  | 3.689 | 2.938 |
| 0.531 | 0.695 | -5.529 | -0.286 | 3.235 | 3.520 |

|       |       |        |        |       |       |
|-------|-------|--------|--------|-------|-------|
| 0.350 | 0.545 | -5.302 | 0.325  | 2.727 | 2.403 |
| 0.241 | 0.438 | -5.065 | -0.517 | 3.804 | 4.321 |
| 0.783 | 0.876 | -5.679 | 0.102  | 4.022 | 3.921 |
| 0.047 | 0.203 | -3.858 | -0.654 | 2.749 | 3.403 |
| 0.179 | 0.370 | -4.863 | -0.336 | 4.527 | 4.863 |
| 0.689 | 0.814 | -5.639 | -0.144 | 2.114 | 2.259 |
| 0.085 | 0.257 | -4.316 | 0.716  | 3.022 | 2.306 |
| 0.403 | 0.591 | -5.384 | -0.310 | 2.631 | 2.941 |
| 0.232 | 0.429 | -5.040 | 0.348  | 2.800 | 2.453 |
| 0.974 | 0.987 | -5.714 | -0.010 | 4.139 | 4.149 |
| 0.651 | 0.787 | -5.618 | -0.131 | 2.480 | 2.611 |
| 0.051 | 0.208 | -3.919 | 0.967  | 6.034 | 5.067 |
| 0.167 | 0.357 | -4.815 | -0.412 | 3.162 | 3.574 |
| 0.148 | 0.332 | -4.726 | 0.404  | 3.948 | 3.543 |
| 0.562 | 0.721 | -5.556 | -0.198 | 1.540 | 1.738 |
| 0.084 | 0.256 | -4.310 | -0.460 | 1.895 | 2.355 |
| 0.059 | 0.221 | -4.041 | 1.165  | 5.847 | 4.682 |
| 0.474 | 0.652 | -5.472 | -0.301 | 2.422 | 2.723 |
| 0.539 | 0.701 | -5.536 | -0.227 | 2.839 | 3.066 |
| 0.597 | 0.747 | -5.583 | -0.153 | 3.771 | 3.924 |
| 0.119 | 0.299 | -4.571 | 0.624  | 2.849 | 2.225 |
| 0.127 | 0.308 | -4.620 | -0.393 | 4.829 | 5.222 |
| 0.293 | 0.491 | -5.193 | -0.282 | 3.529 | 3.810 |
| 0.440 | 0.624 | -5.432 | 0.327  | 2.426 | 2.099 |
| 0.488 | 0.663 | -5.487 | -0.189 | 2.459 | 2.647 |
| 0.057 | 0.218 | -4.007 | -0.514 | 2.582 | 3.096 |
| 0.041 | 0.195 | -3.757 | 0.424  | 7.009 | 6.585 |
| 0.007 | 0.157 | -2.307 | 1.388  | 9.649 | 8.261 |
| 0.311 | 0.508 | -5.229 | -0.370 | 5.206 | 5.576 |
| 0.170 | 0.361 | -4.827 | 0.274  | 6.826 | 6.552 |
| 0.093 | 0.268 | -4.385 | -0.541 | 3.018 | 3.559 |
| 0.176 | 0.365 | -4.850 | 0.397  | 4.673 | 4.276 |
| 0.351 | 0.546 | -5.303 | -0.195 | 8.336 | 8.531 |
| 0.054 | 0.214 | -3.964 | 1.179  | 4.820 | 3.642 |
| 0.999 | 0.999 | -5.715 | 0.000  | 4.309 | 4.308 |
| 0.031 | 0.181 | -3.530 | 0.937  | 9.390 | 8.453 |
| 0.092 | 0.267 | -4.379 | 0.360  | 6.522 | 6.162 |
| 0.581 | 0.736 | -5.571 | 0.156  | 3.966 | 3.810 |
| 0.110 | 0.289 | -4.510 | 0.344  | 4.511 | 4.167 |
| 0.272 | 0.470 | -5.145 | -0.269 | 5.370 | 5.639 |
| 0.045 | 0.201 | -3.820 | 0.612  | 7.793 | 7.181 |
| 0.380 | 0.569 | -5.350 | -0.290 | 4.777 | 5.067 |
| 0.847 | 0.916 | -5.697 | 0.093  | 2.230 | 2.137 |
| 0.433 | 0.618 | -5.424 | 0.174  | 3.137 | 2.963 |
| 0.243 | 0.441 | -5.072 | -0.523 | 3.688 | 4.211 |
| 0.029 | 0.178 | -3.492 | 0.608  | 6.776 | 6.168 |
| 0.141 | 0.325 | -4.692 | 0.420  | 4.420 | 4.000 |
| 0.057 | 0.219 | -4.017 | -0.600 | 3.303 | 3.903 |
| 0.042 | 0.198 | -3.783 | 0.951  | 5.382 | 4.430 |
| 0.074 | 0.242 | -4.215 | -0.562 | 1.789 | 2.351 |

|       |       |        |        |       |       |
|-------|-------|--------|--------|-------|-------|
| 0.001 | 0.157 | -1.050 | -0.921 | 4.391 | 5.312 |
| 0.796 | 0.885 | -5.683 | -0.076 | 3.204 | 3.280 |
| 0.103 | 0.280 | -4.462 | -0.935 | 2.205 | 3.140 |
| 0.696 | 0.819 | -5.642 | -0.151 | 2.392 | 2.542 |
| 0.223 | 0.419 | -5.013 | -0.327 | 2.349 | 2.675 |
| 0.589 | 0.741 | -5.576 | 0.169  | 4.740 | 4.570 |
| 0.781 | 0.874 | -5.678 | -0.095 | 3.664 | 3.758 |
| 0.210 | 0.404 | -4.972 | 0.345  | 5.140 | 4.795 |
| 0.061 | 0.223 | -4.060 | 0.609  | 7.415 | 6.805 |
| 0.024 | 0.173 | -3.317 | -0.512 | 6.890 | 7.402 |
| 0.002 | 0.157 | -1.456 | -1.199 | 6.359 | 7.559 |
| 0.082 | 0.253 | -4.290 | -0.579 | 2.082 | 2.662 |
| 0.013 | 0.160 | -2.835 | -1.355 | 6.562 | 7.917 |
| 0.346 | 0.541 | -5.294 | 0.184  | 8.630 | 8.446 |
| 0.140 | 0.324 | -4.689 | 0.478  | 4.582 | 4.104 |
| 0.047 | 0.203 | -3.857 | -1.082 | 6.949 | 8.030 |
| 0.047 | 0.203 | -3.859 | -1.092 | 6.978 | 8.070 |
| 0.868 | 0.928 | -5.702 | -0.046 | 3.962 | 4.008 |
| 0.522 | 0.688 | -5.520 | 0.186  | 3.078 | 2.892 |
| 0.444 | 0.627 | -5.437 | 0.191  | 4.947 | 4.756 |
| 0.083 | 0.255 | -4.303 | -0.500 | 3.991 | 4.491 |
| 0.007 | 0.157 | -2.333 | 0.717  | 3.967 | 3.250 |
| 0.006 | 0.157 | -2.221 | 0.810  | 3.550 | 2.740 |
| 0.049 | 0.207 | -3.895 | 0.651  | 5.037 | 4.387 |
| 0.564 | 0.721 | -5.557 | 0.175  | 4.840 | 4.665 |
| 0.022 | 0.170 | -3.258 | -0.800 | 5.323 | 6.124 |
| 0.019 | 0.164 | -3.127 | 1.384  | 6.317 | 4.933 |
| 0.076 | 0.245 | -4.234 | 0.451  | 7.882 | 7.431 |
| 0.281 | 0.478 | -5.164 | -0.401 | 3.923 | 4.325 |
| 0.866 | 0.928 | -5.701 | 0.035  | 5.083 | 5.048 |
| 0.901 | 0.946 | -5.708 | -0.034 | 4.371 | 4.405 |
| 0.118 | 0.298 | -4.566 | 0.394  | 7.736 | 7.342 |
| 0.019 | 0.164 | -3.143 | 0.909  | 5.160 | 4.251 |
| 0.014 | 0.160 | -2.866 | 1.553  | 6.736 | 5.184 |
| 0.719 | 0.834 | -5.653 | -0.111 | 4.203 | 4.314 |
| 0.590 | 0.743 | -5.578 | -0.143 | 2.409 | 2.552 |
| 0.692 | 0.816 | -5.641 | -0.273 | 2.317 | 2.590 |
| 0.203 | 0.398 | -4.951 | 0.459  | 3.147 | 2.689 |
| 0.501 | 0.671 | -5.500 | 0.157  | 3.715 | 3.558 |
| 0.059 | 0.221 | -4.043 | 0.945  | 5.810 | 4.865 |
| 0.132 | 0.315 | -4.646 | 0.669  | 5.089 | 4.420 |
| 0.145 | 0.329 | -4.712 | 0.658  | 4.818 | 4.160 |
| 0.027 | 0.177 | -3.434 | -0.684 | 3.259 | 3.943 |
| 0.255 | 0.452 | -5.102 | 0.314  | 4.060 | 3.746 |
| 0.172 | 0.362 | -4.835 | 0.293  | 7.575 | 7.281 |
| 0.680 | 0.808 | -5.634 | -0.106 | 4.252 | 4.358 |
| 0.890 | 0.940 | -5.706 | -0.037 | 3.316 | 3.353 |
| 0.967 | 0.984 | -5.714 | 0.012  | 4.903 | 4.891 |
| 0.227 | 0.424 | -5.025 | -0.346 | 6.193 | 6.540 |
| 0.364 | 0.555 | -5.324 | 0.225  | 4.398 | 4.173 |

|       |       |        |        |        |       |
|-------|-------|--------|--------|--------|-------|
| 0.090 | 0.264 | -4.360 | 0.395  | 6.896  | 6.501 |
| 0.169 | 0.359 | -4.822 | 0.268  | 6.572  | 6.304 |
| 0.997 | 0.998 | -5.715 | 0.001  | 5.624  | 5.623 |
| 0.159 | 0.348 | -4.780 | 0.347  | 6.874  | 6.527 |
| 0.069 | 0.235 | -4.159 | 0.434  | 5.132  | 4.698 |
| 0.028 | 0.178 | -3.449 | 0.452  | 6.786  | 6.333 |
| 0.751 | 0.856 | -5.667 | 0.066  | 6.094  | 6.028 |
| 0.354 | 0.548 | -5.309 | 0.237  | 7.055  | 6.818 |
| 0.761 | 0.863 | -5.671 | -0.071 | 3.931  | 4.002 |
| 0.982 | 0.990 | -5.715 | 0.005  | 5.274  | 5.269 |
| 0.087 | 0.260 | -4.337 | 0.358  | 10.091 | 9.733 |
| 0.011 | 0.157 | -2.679 | 0.590  | 7.414  | 6.825 |
| 0.057 | 0.219 | -4.017 | -0.533 | 3.868  | 4.401 |
| 0.189 | 0.381 | -4.899 | 0.320  | 3.197  | 2.877 |
| 0.864 | 0.927 | -5.701 | -0.053 | 4.452  | 4.505 |
| 0.076 | 0.245 | -4.237 | 0.401  | 6.152  | 5.751 |
| 0.158 | 0.346 | -4.775 | 0.353  | 5.431  | 5.078 |
| 0.805 | 0.890 | -5.686 | 0.061  | 6.507  | 6.446 |
| 0.449 | 0.631 | -5.444 | -0.328 | 2.812  | 3.140 |
| 0.487 | 0.662 | -5.486 | 0.275  | 2.642  | 2.367 |
| 0.935 | 0.965 | -5.712 | -0.030 | 3.060  | 3.091 |
| 0.913 | 0.954 | -5.709 | 0.048  | 4.572  | 4.524 |
| 0.418 | 0.604 | -5.404 | 0.155  | 6.102  | 5.947 |
| 0.106 | 0.284 | -4.486 | 0.373  | 6.566  | 6.193 |
| 0.239 | 0.436 | -5.059 | -0.298 | 2.621  | 2.918 |
| 0.371 | 0.562 | -5.337 | -0.247 | 3.399  | 3.646 |
| 0.123 | 0.304 | -4.594 | -0.395 | 6.739  | 7.133 |
| 0.809 | 0.893 | -5.687 | -0.080 | 2.570  | 2.651 |
| 0.527 | 0.692 | -5.525 | 0.203  | 7.305  | 7.102 |
| 0.209 | 0.404 | -4.971 | -0.378 | 8.176  | 8.554 |
| 0.654 | 0.789 | -5.620 | 0.122  | 1.955  | 1.833 |
| 0.159 | 0.348 | -4.780 | 0.498  | 4.263  | 3.765 |
| 0.090 | 0.264 | -4.359 | 0.436  | 2.618  | 2.182 |
| 0.321 | 0.518 | -5.249 | 0.391  | 2.970  | 2.579 |
| 0.596 | 0.747 | -5.582 | -0.142 | 2.830  | 2.971 |
| 0.139 | 0.323 | -4.682 | 1.021  | 4.835  | 3.814 |
| 0.814 | 0.895 | -5.689 | -0.064 | 6.324  | 6.388 |
| 0.619 | 0.763 | -5.597 | -0.313 | 4.325  | 4.638 |
| 0.537 | 0.699 | -5.534 | -0.333 | 6.424  | 6.757 |
| 0.999 | 0.999 | -5.715 | -0.001 | 6.307  | 6.308 |
| 0.936 | 0.966 | -5.712 | 0.037  | 2.494  | 2.457 |
| 0.083 | 0.255 | -4.302 | 0.691  | 3.860  | 3.169 |
| 0.218 | 0.412 | -4.997 | 0.439  | 7.956  | 7.518 |
| 0.761 | 0.863 | -5.671 | 0.094  | 9.434  | 9.341 |
| 0.830 | 0.904 | -5.693 | 0.058  | 6.461  | 6.404 |
| 0.038 | 0.192 | -3.692 | 0.520  | 4.583  | 4.062 |
| 0.327 | 0.523 | -5.261 | 0.209  | 4.863  | 4.654 |
| 0.929 | 0.961 | -5.711 | -0.024 | 4.206  | 4.230 |
| 0.185 | 0.376 | -4.884 | 0.313  | 4.986  | 4.673 |
| 0.733 | 0.844 | -5.660 | 0.139  | 3.260  | 3.121 |



|       |       |        |        |       |       |
|-------|-------|--------|--------|-------|-------|
| 0.434 | 0.618 | -5.425 | -0.224 | 2.831 | 3.055 |
| 0.163 | 0.352 | -4.797 | -0.471 | 3.665 | 4.136 |
| 0.380 | 0.569 | -5.350 | -0.241 | 3.985 | 4.226 |
| 0.046 | 0.203 | -3.839 | -0.727 | 7.730 | 8.457 |
| 0.406 | 0.594 | -5.388 | -0.251 | 4.214 | 4.466 |
| 0.127 | 0.307 | -4.615 | 0.308  | 7.003 | 6.695 |
| 0.424 | 0.609 | -5.412 | 0.149  | 7.624 | 7.475 |
| 0.764 | 0.864 | -5.672 | -0.064 | 6.863 | 6.927 |
| 0.916 | 0.954 | -5.709 | 0.029  | 6.351 | 6.322 |
| 0.077 | 0.246 | -4.245 | 0.391  | 5.915 | 5.524 |
| 0.048 | 0.204 | -3.872 | -0.621 | 2.736 | 3.358 |
| 0.514 | 0.682 | -5.513 | -0.140 | 4.662 | 4.802 |
| 0.032 | 0.182 | -3.552 | 0.438  | 6.849 | 6.410 |
| 0.013 | 0.160 | -2.845 | 0.628  | 4.570 | 3.942 |
| 0.467 | 0.646 | -5.464 | -0.255 | 3.462 | 3.717 |
| 0.546 | 0.708 | -5.542 | -0.160 | 6.246 | 6.405 |
| 0.039 | 0.192 | -3.707 | -0.555 | 6.192 | 6.747 |
| 0.272 | 0.470 | -5.144 | -0.240 | 7.362 | 7.602 |
| 0.992 | 0.996 | -5.715 | 0.003  | 9.965 | 9.962 |
| 0.293 | 0.490 | -5.191 | -0.674 | 3.243 | 3.917 |
| 0.271 | 0.469 | -5.141 | 0.602  | 7.122 | 6.520 |
| 0.974 | 0.987 | -5.714 | -0.011 | 7.645 | 7.656 |
| 0.970 | 0.985 | -5.714 | 0.024  | 5.161 | 5.137 |
| 0.885 | 0.937 | -5.705 | -0.063 | 6.575 | 6.639 |
| 0.615 | 0.759 | -5.595 | -0.176 | 9.031 | 9.207 |
| 0.679 | 0.808 | -5.634 | 0.162  | 7.749 | 7.587 |
| 0.970 | 0.985 | -5.714 | -0.014 | 3.480 | 3.494 |
| 0.704 | 0.824 | -5.646 | 0.153  | 8.302 | 8.150 |
| 0.759 | 0.861 | -5.670 | 0.162  | 6.095 | 5.933 |
| 0.907 | 0.950 | -5.708 | -0.040 | 7.496 | 7.536 |
| 0.754 | 0.858 | -5.668 | 0.095  | 9.391 | 9.295 |
| 0.138 | 0.321 | -4.676 | 0.641  | 4.183 | 3.542 |
| 0.836 | 0.908 | -5.694 | -0.070 | 4.921 | 4.991 |
| 0.006 | 0.157 | -2.268 | -0.872 | 4.856 | 5.728 |
| 0.061 | 0.223 | -4.059 | 0.879  | 5.084 | 4.206 |
| 0.086 | 0.258 | -4.327 | 0.450  | 6.684 | 6.234 |
| 0.317 | 0.516 | -5.242 | 0.245  | 3.194 | 2.949 |
| 0.786 | 0.878 | -5.680 | 0.095  | 3.597 | 3.503 |
| 0.071 | 0.239 | -4.186 | 1.050  | 5.749 | 4.698 |
| 0.066 | 0.231 | -4.130 | -0.526 | 3.897 | 4.423 |
| 0.006 | 0.157 | -2.151 | -1.003 | 5.615 | 6.618 |
| 0.689 | 0.814 | -5.639 | -0.114 | 5.105 | 5.218 |
| 0.121 | 0.302 | -4.583 | -0.510 | 3.788 | 4.297 |
| 0.563 | 0.721 | -5.557 | -0.232 | 4.940 | 5.172 |
| 0.764 | 0.864 | -5.672 | -0.096 | 2.718 | 2.814 |
| 0.902 | 0.947 | -5.708 | 0.040  | 6.166 | 6.126 |
| 0.071 | 0.238 | -4.179 | 0.571  | 6.122 | 5.552 |
| 0.649 | 0.785 | -5.617 | -0.132 | 3.957 | 4.089 |
| 0.091 | 0.267 | -4.373 | 0.445  | 3.069 | 2.624 |
| 0.242 | 0.439 | -5.067 | 0.362  | 2.416 | 2.053 |

|       |       |        |        |       |       |
|-------|-------|--------|--------|-------|-------|
| 0.473 | 0.652 | -5.471 | 0.221  | 3.041 | 2.820 |
| 0.024 | 0.173 | -3.332 | 0.585  | 8.847 | 8.262 |
| 0.063 | 0.226 | -4.086 | -0.546 | 3.619 | 4.165 |
| 0.262 | 0.460 | -5.120 | 0.294  | 3.224 | 2.930 |
| 0.047 | 0.203 | -3.856 | 0.731  | 7.743 | 7.012 |
| 0.278 | 0.477 | -5.160 | 0.467  | 6.007 | 5.539 |
| 0.025 | 0.175 | -3.364 | -0.588 | 4.549 | 5.137 |
| 0.934 | 0.964 | -5.711 | 0.022  | 3.499 | 3.477 |
| 0.637 | 0.777 | -5.610 | -0.169 | 2.552 | 2.721 |
| 0.909 | 0.951 | -5.709 | 0.032  | 2.830 | 2.798 |
| 0.482 | 0.658 | -5.481 | 0.294  | 6.088 | 5.794 |
| 0.459 | 0.639 | -5.455 | -0.165 | 5.713 | 5.878 |
| 0.059 | 0.221 | -4.040 | -0.620 | 4.157 | 4.777 |
| 0.597 | 0.747 | -5.583 | 0.181  | 2.838 | 2.656 |
| 0.883 | 0.936 | -5.705 | -0.053 | 3.511 | 3.564 |
| 0.042 | 0.196 | -3.769 | -0.623 | 3.669 | 4.292 |
| 0.033 | 0.184 | -3.573 | 0.662  | 5.478 | 4.817 |
| 0.489 | 0.664 | -5.489 | -0.419 | 2.711 | 3.131 |
| 0.150 | 0.336 | -4.739 | 0.547  | 6.086 | 5.538 |
| 0.760 | 0.862 | -5.671 | 0.071  | 5.317 | 5.247 |
| 0.018 | 0.163 | -3.115 | -1.091 | 5.678 | 6.769 |
| 0.015 | 0.160 | -2.949 | -0.864 | 5.663 | 6.528 |
| 0.101 | 0.278 | -4.448 | -0.591 | 4.346 | 4.937 |
| 0.876 | 0.933 | -5.703 | -0.083 | 2.531 | 2.613 |
| 0.011 | 0.159 | -2.730 | 0.731  | 9.585 | 8.854 |
| 0.107 | 0.285 | -4.491 | 0.518  | 4.396 | 3.878 |
| 0.307 | 0.505 | -5.222 | -0.360 | 3.562 | 3.922 |
| 0.059 | 0.221 | -4.039 | 0.363  | 7.700 | 7.336 |
| 0.007 | 0.157 | -2.368 | -0.893 | 6.285 | 7.178 |
| 0.425 | 0.611 | -5.414 | -0.287 | 4.890 | 5.177 |
| 0.005 | 0.157 | -2.025 | -0.945 | 3.846 | 4.791 |
| 0.032 | 0.182 | -3.561 | 0.792  | 4.459 | 3.667 |
| 0.089 | 0.264 | -4.355 | -0.470 | 2.205 | 2.674 |
| 0.076 | 0.245 | -4.236 | 0.535  | 4.172 | 3.637 |
| 0.003 | 0.157 | -1.660 | -1.212 | 5.217 | 6.429 |
| 0.007 | 0.157 | -2.350 | 0.839  | 6.259 | 5.420 |
| 0.154 | 0.341 | -4.756 | 0.288  | 7.209 | 6.922 |
| 0.015 | 0.160 | -2.940 | 1.526  | 8.273 | 6.748 |
| 0.017 | 0.162 | -3.032 | 0.687  | 4.846 | 4.159 |
| 0.039 | 0.194 | -3.724 | 0.556  | 5.863 | 5.307 |
| 0.160 | 0.349 | -4.783 | -0.474 | 5.701 | 6.176 |
| 0.398 | 0.585 | -5.376 | 0.366  | 2.861 | 2.495 |
| 0.100 | 0.277 | -4.443 | 0.363  | 6.770 | 6.407 |
| 0.249 | 0.447 | -5.088 | 0.347  | 4.427 | 4.080 |
| 0.507 | 0.677 | -5.507 | -0.173 | 3.415 | 3.588 |
| 0.246 | 0.443 | -5.079 | -0.288 | 3.523 | 3.811 |
| 0.029 | 0.178 | -3.471 | -0.701 | 5.178 | 5.879 |
| 0.660 | 0.793 | -5.623 | -0.151 | 3.678 | 3.829 |
| 0.164 | 0.353 | -4.800 | -0.335 | 6.667 | 7.001 |
| 0.048 | 0.204 | -3.871 | 0.429  | 5.649 | 5.220 |

|       |       |        |        |       |       |
|-------|-------|--------|--------|-------|-------|
| 0.350 | 0.545 | -5.302 | 0.330  | 3.660 | 3.330 |
| 0.885 | 0.937 | -5.705 | -0.037 | 5.018 | 5.054 |
| 0.163 | 0.352 | -4.798 | -0.351 | 4.154 | 4.505 |
| 0.005 | 0.157 | -2.010 | 0.867  | 5.942 | 5.075 |
| 0.257 | 0.455 | -5.108 | -0.427 | 5.875 | 6.303 |
| 0.123 | 0.304 | -4.594 | 0.686  | 7.991 | 7.305 |
| 0.017 | 0.162 | -3.031 | 1.059  | 8.620 | 7.561 |
| 0.107 | 0.286 | -4.492 | 0.514  | 8.310 | 7.796 |
| 0.042 | 0.197 | -3.776 | 0.795  | 8.665 | 7.870 |
| 0.217 | 0.412 | -4.996 | -0.319 | 3.578 | 3.897 |
| 0.043 | 0.200 | -3.801 | 1.137  | 9.287 | 8.150 |
| 0.242 | 0.439 | -5.068 | 0.255  | 7.410 | 7.156 |
| 0.029 | 0.178 | -3.486 | 0.495  | 8.518 | 8.022 |
| 0.552 | 0.713 | -5.547 | -0.354 | 3.604 | 3.958 |
| 0.051 | 0.208 | -3.921 | -0.530 | 5.327 | 5.857 |
| 0.094 | 0.270 | -4.393 | 0.462  | 4.495 | 4.033 |
| 0.157 | 0.345 | -4.770 | 0.411  | 7.833 | 7.422 |
| 0.059 | 0.221 | -4.045 | -0.531 | 5.999 | 6.530 |
| 0.258 | 0.456 | -5.111 | 0.357  | 5.214 | 4.857 |
| 0.715 | 0.831 | -5.652 | -0.100 | 2.649 | 2.749 |
| 0.284 | 0.482 | -5.172 | -0.279 | 2.833 | 3.112 |
| 0.025 | 0.174 | -3.347 | -0.723 | 1.808 | 2.531 |
| 0.031 | 0.180 | -3.526 | 0.820  | 8.479 | 7.659 |
| 0.059 | 0.220 | -4.034 | -0.574 | 5.014 | 5.588 |
| 0.062 | 0.225 | -4.082 | -0.401 | 7.288 | 7.689 |
| 0.057 | 0.219 | -4.017 | -0.401 | 7.040 | 7.441 |
| 0.327 | 0.523 | -5.260 | -0.267 | 5.403 | 5.671 |
| 0.250 | 0.448 | -5.090 | -0.254 | 6.286 | 6.540 |
| 0.029 | 0.178 | -3.489 | -1.032 | 1.988 | 3.019 |
| 0.179 | 0.370 | -4.864 | -0.455 | 7.189 | 7.644 |
| 0.183 | 0.374 | -4.879 | -0.454 | 5.827 | 6.281 |
| 0.050 | 0.208 | -3.909 | -0.453 | 7.757 | 8.209 |
| 0.285 | 0.483 | -5.176 | -0.386 | 5.078 | 5.464 |
| 0.437 | 0.621 | -5.429 | -0.229 | 3.552 | 3.781 |
| 0.051 | 0.210 | -3.932 | 0.519  | 3.957 | 3.437 |
| 0.687 | 0.812 | -5.638 | -0.078 | 8.752 | 8.830 |
| 0.145 | 0.329 | -4.713 | 0.537  | 7.416 | 6.880 |
| 0.164 | 0.353 | -4.800 | -0.369 | 4.912 | 5.281 |
| 0.072 | 0.240 | -4.194 | 0.349  | 6.236 | 5.887 |
| 0.081 | 0.252 | -4.281 | 0.554  | 7.441 | 6.888 |
| 0.018 | 0.164 | -3.120 | 1.163  | 7.292 | 6.128 |
| 0.008 | 0.157 | -2.431 | -1.105 | 2.703 | 3.809 |
| 0.715 | 0.831 | -5.652 | -0.147 | 4.310 | 4.457 |
| 0.588 | 0.741 | -5.576 | -0.187 | 3.949 | 4.137 |
| 0.342 | 0.538 | -5.289 | -0.295 | 3.238 | 3.533 |
| 0.081 | 0.252 | -4.278 | 0.411  | 7.275 | 6.865 |
| 0.015 | 0.160 | -2.937 | 0.570  | 9.991 | 9.421 |
| 0.294 | 0.491 | -5.194 | -0.463 | 4.631 | 5.094 |
| 0.036 | 0.188 | -3.648 | -0.791 | 4.661 | 5.452 |
| 0.113 | 0.291 | -4.528 | -0.756 | 2.470 | 3.226 |

|       |       |        |        |        |        |
|-------|-------|--------|--------|--------|--------|
| 0.036 | 0.189 | -3.657 | 0.501  | 6.476  | 5.974  |
| 0.510 | 0.679 | -5.510 | -0.381 | 2.408  | 2.789  |
| 0.032 | 0.182 | -3.560 | -0.604 | 5.888  | 6.492  |
| 0.813 | 0.894 | -5.688 | 0.055  | 7.790  | 7.735  |
| 0.018 | 0.162 | -3.085 | 1.206  | 5.614  | 4.408  |
| 0.667 | 0.798 | -5.627 | 0.166  | 2.482  | 2.316  |
| 0.929 | 0.961 | -5.711 | -0.069 | 4.331  | 4.400  |
| 0.032 | 0.182 | -3.551 | 1.063  | 8.643  | 7.580  |
| 0.604 | 0.753 | -5.588 | -0.140 | 8.055  | 8.195  |
| 0.005 | 0.157 | -1.999 | -1.190 | 6.307  | 7.497  |
| 0.035 | 0.187 | -3.637 | 0.491  | 8.362  | 7.870  |
| 0.109 | 0.288 | -4.504 | 0.333  | 7.811  | 7.478  |
| 0.012 | 0.160 | -2.768 | 0.741  | 7.501  | 6.760  |
| 0.694 | 0.817 | -5.642 | -0.089 | 4.319  | 4.408  |
| 0.023 | 0.173 | -3.299 | -0.864 | 2.119  | 2.983  |
| 0.817 | 0.896 | -5.689 | 0.064  | 5.551  | 5.487  |
| 0.012 | 0.160 | -2.755 | -0.790 | 5.061  | 5.851  |
| 0.031 | 0.182 | -3.542 | -0.581 | 5.954  | 6.535  |
| 0.091 | 0.267 | -4.374 | 0.438  | 8.074  | 7.636  |
| 0.057 | 0.218 | -4.006 | 0.723  | 8.445  | 7.722  |
| 0.104 | 0.281 | -4.468 | -0.345 | 6.170  | 6.515  |
| 0.022 | 0.171 | -3.277 | 1.201  | 5.818  | 4.617  |
| 0.039 | 0.194 | -3.726 | -0.743 | 1.952  | 2.695  |
| 0.013 | 0.160 | -2.835 | 0.524  | 5.086  | 4.562  |
| 0.164 | 0.353 | -4.799 | 0.614  | 3.573  | 2.959  |
| 0.294 | 0.491 | -5.193 | 0.200  | 7.609  | 7.409  |
| 0.014 | 0.160 | -2.900 | 0.637  | 4.576  | 3.939  |
| 0.019 | 0.165 | -3.156 | 0.618  | 4.542  | 3.924  |
| 0.119 | 0.298 | -4.567 | 0.302  | 5.810  | 5.508  |
| 0.034 | 0.184 | -3.603 | 0.565  | 5.634  | 5.069  |
| 0.174 | 0.364 | -4.844 | -0.593 | 8.659  | 9.252  |
| 0.344 | 0.539 | -5.292 | -0.374 | 3.001  | 3.375  |
| 0.594 | 0.746 | -5.581 | 0.147  | 3.089  | 2.942  |
| 0.076 | 0.245 | -4.231 | 0.591  | 8.737  | 8.146  |
| 0.104 | 0.281 | -4.467 | 0.728  | 6.465  | 5.737  |
| 0.836 | 0.908 | -5.694 | 0.054  | 4.720  | 4.666  |
| 0.081 | 0.253 | -4.283 | 0.554  | 8.056  | 7.502  |
| 0.006 | 0.157 | -2.204 | -0.618 | 4.706  | 5.324  |
| 0.805 | 0.890 | -5.686 | -0.055 | 5.168  | 5.223  |
| 0.042 | 0.196 | -3.770 | 0.854  | 7.832  | 6.978  |
| 0.419 | 0.606 | -5.406 | 0.699  | 8.760  | 8.060  |
| 0.221 | 0.417 | -5.006 | 1.068  | 11.115 | 10.047 |
| 0.282 | 0.480 | -5.167 | 0.746  | 10.500 | 9.754  |
| 0.009 | 0.157 | -2.536 | 0.901  | 8.452  | 7.551  |
| 0.135 | 0.318 | -4.660 | 0.438  | 2.724  | 2.286  |
| 0.053 | 0.212 | -3.952 | 0.749  | 4.325  | 3.576  |
| 0.085 | 0.257 | -4.316 | -0.711 | 3.900  | 4.611  |
| 0.203 | 0.398 | -4.950 | -0.465 | 2.463  | 2.928  |
| 0.140 | 0.324 | -4.689 | -0.357 | 6.079  | 6.436  |
| 0.042 | 0.198 | -3.780 | 0.987  | 5.700  | 4.713  |

|       |       |        |        |       |       |
|-------|-------|--------|--------|-------|-------|
| 0.012 | 0.160 | -2.787 | 1.374  | 7.532 | 6.158 |
| 0.169 | 0.359 | -4.821 | -0.313 | 5.080 | 5.394 |
| 0.046 | 0.203 | -3.841 | -0.526 | 4.443 | 4.969 |
| 0.390 | 0.577 | -5.365 | -0.199 | 5.772 | 5.971 |
| 0.008 | 0.157 | -2.483 | 1.631  | 7.822 | 6.191 |
| 0.171 | 0.361 | -4.832 | 0.584  | 7.271 | 6.687 |
| 0.014 | 0.160 | -2.895 | 0.980  | 5.794 | 4.813 |
| 0.370 | 0.560 | -5.335 | 0.241  | 3.244 | 3.003 |
| 0.406 | 0.594 | -5.388 | 0.187  | 5.417 | 5.230 |
| 0.057 | 0.218 | -4.006 | 0.586  | 2.481 | 1.895 |
| 0.012 | 0.160 | -2.800 | 1.545  | 5.848 | 4.303 |
| 0.002 | 0.157 | -1.278 | 2.540  | 6.576 | 4.036 |
| 0.221 | 0.418 | -5.009 | 0.268  | 6.849 | 6.581 |
| 0.302 | 0.500 | -5.212 | -0.244 | 3.169 | 3.413 |
| 0.079 | 0.249 | -4.260 | -0.440 | 3.446 | 3.886 |
| 0.305 | 0.503 | -5.218 | -0.276 | 3.803 | 4.078 |
| 0.387 | 0.575 | -5.361 | -0.198 | 2.895 | 3.093 |
| 0.097 | 0.273 | -4.416 | -0.389 | 6.320 | 6.709 |
| 0.058 | 0.219 | -4.024 | -0.611 | 1.439 | 2.051 |
| 0.258 | 0.456 | -5.111 | -0.404 | 2.112 | 2.516 |
| 0.353 | 0.548 | -5.307 | 0.445  | 5.652 | 5.206 |
| 0.073 | 0.241 | -4.201 | -0.446 | 2.838 | 3.284 |
| 0.673 | 0.804 | -5.631 | -0.115 | 6.722 | 6.837 |
| 0.738 | 0.848 | -5.662 | -0.080 | 3.395 | 3.475 |
| 0.894 | 0.942 | -5.706 | -0.032 | 4.375 | 4.407 |
| 0.685 | 0.811 | -5.637 | -0.117 | 3.384 | 3.501 |
| 0.044 | 0.200 | -3.804 | 0.880  | 5.854 | 4.974 |
| 0.025 | 0.175 | -3.359 | -0.810 | 2.551 | 3.361 |
| 0.072 | 0.240 | -4.196 | 0.425  | 9.525 | 9.100 |
| 0.273 | 0.471 | -5.147 | 0.292  | 4.585 | 4.293 |
| 0.705 | 0.824 | -5.647 | 0.084  | 3.161 | 3.077 |
| 0.876 | 0.932 | -5.703 | -0.044 | 5.445 | 5.489 |
| 0.047 | 0.204 | -3.864 | 0.595  | 5.041 | 4.446 |
| 0.022 | 0.171 | -3.274 | -0.572 | 3.671 | 4.242 |
| 0.277 | 0.475 | -5.155 | 0.333  | 3.799 | 3.465 |
| 0.194 | 0.387 | -4.918 | 0.312  | 6.817 | 6.505 |
| 0.144 | 0.328 | -4.707 | 0.423  | 4.791 | 4.369 |
| 0.378 | 0.568 | -5.347 | -0.213 | 3.412 | 3.625 |
| 0.098 | 0.274 | -4.422 | 0.490  | 5.321 | 4.831 |
| 0.376 | 0.566 | -5.344 | -0.230 | 4.811 | 5.042 |
| 0.007 | 0.157 | -2.351 | -0.895 | 3.238 | 4.133 |
| 0.273 | 0.471 | -5.147 | -0.291 | 3.820 | 4.111 |
| 0.295 | 0.492 | -5.197 | 0.241  | 5.675 | 5.434 |
| 0.013 | 0.160 | -2.822 | 1.165  | 6.349 | 5.185 |
| 0.026 | 0.175 | -3.386 | -0.612 | 6.884 | 7.496 |
| 0.013 | 0.160 | -2.828 | -1.437 | 2.522 | 3.959 |
| 0.179 | 0.369 | -4.861 | 0.326  | 6.228 | 5.902 |
| 0.015 | 0.160 | -2.928 | 1.145  | 5.459 | 4.314 |
| 0.002 | 0.157 | -1.442 | -0.769 | 3.711 | 4.480 |
| 0.052 | 0.211 | -3.941 | -0.570 | 7.967 | 8.536 |

|       |       |        |        |       |       |
|-------|-------|--------|--------|-------|-------|
| 0.524 | 0.689 | -5.523 | 0.166  | 6.238 | 6.072 |
| 0.789 | 0.880 | -5.681 | -0.068 | 2.670 | 2.738 |
| 0.013 | 0.160 | -2.816 | -0.799 | 4.564 | 5.363 |
| 0.380 | 0.569 | -5.350 | -0.237 | 2.561 | 2.798 |
| 0.210 | 0.404 | -4.972 | 0.241  | 4.949 | 4.708 |
| 0.117 | 0.297 | -4.555 | 0.393  | 4.770 | 4.377 |
| 0.015 | 0.161 | -2.968 | -0.986 | 4.737 | 5.724 |
| 0.633 | 0.773 | -5.607 | 0.135  | 3.230 | 3.095 |
| 0.984 | 0.991 | -5.715 | 0.004  | 2.293 | 2.289 |
| 0.013 | 0.160 | -2.811 | -1.177 | 5.575 | 6.752 |
| 0.297 | 0.494 | -5.202 | 0.230  | 4.976 | 4.746 |
| 0.131 | 0.312 | -4.638 | 0.413  | 6.330 | 5.917 |
| 0.968 | 0.984 | -5.714 | -0.011 | 2.541 | 2.553 |
| 0.046 | 0.203 | -3.849 | 0.602  | 9.922 | 9.320 |
| 0.204 | 0.399 | -4.954 | -0.288 | 2.561 | 2.849 |
| 0.004 | 0.157 | -1.778 | -0.917 | 2.349 | 3.266 |
| 0.116 | 0.296 | -4.553 | 0.418  | 3.011 | 2.593 |
| 0.883 | 0.936 | -5.704 | 0.047  | 3.886 | 3.839 |
| 0.004 | 0.157 | -1.916 | -0.993 | 3.353 | 4.346 |
| 0.081 | 0.252 | -4.278 | 0.649  | 4.401 | 3.752 |
| 0.520 | 0.687 | -5.519 | 0.212  | 3.834 | 3.622 |
| 0.358 | 0.552 | -5.316 | 0.248  | 3.213 | 2.965 |
| 0.034 | 0.184 | -3.600 | 1.299  | 8.664 | 7.365 |
| 0.066 | 0.231 | -4.127 | 0.458  | 4.402 | 3.944 |
| 0.383 | 0.572 | -5.355 | 0.188  | 4.917 | 4.729 |
| 0.357 | 0.551 | -5.313 | -0.282 | 2.110 | 2.392 |
| 0.026 | 0.175 | -3.386 | 1.210  | 6.695 | 5.485 |
| 0.454 | 0.634 | -5.449 | 0.287  | 2.535 | 2.247 |
| 0.031 | 0.182 | -3.546 | 0.510  | 8.302 | 7.792 |
| 0.900 | 0.945 | -5.707 | 0.029  | 6.066 | 6.037 |
| 0.575 | 0.729 | -5.566 | -0.152 | 3.836 | 3.988 |
| 0.702 | 0.822 | -5.645 | -0.100 | 1.681 | 1.781 |
| 0.941 | 0.968 | -5.712 | 0.019  | 4.214 | 4.196 |
| 0.022 | 0.171 | -3.260 | 0.942  | 7.225 | 6.283 |
| 0.127 | 0.308 | -4.619 | 0.392  | 4.940 | 4.549 |
| 0.186 | 0.378 | -4.888 | 0.282  | 7.783 | 7.501 |
| 0.113 | 0.292 | -4.531 | 0.330  | 9.904 | 9.574 |
| 0.126 | 0.307 | -4.611 | 0.325  | 9.871 | 9.545 |
| 0.063 | 0.227 | -4.094 | -0.541 | 3.464 | 4.005 |
| 0.064 | 0.228 | -4.102 | 0.488  | 4.845 | 4.357 |
| 0.003 | 0.157 | -1.600 | 1.080  | 3.523 | 2.444 |
| 0.153 | 0.340 | -4.750 | 0.429  | 4.040 | 3.611 |
| 0.909 | 0.951 | -5.709 | -0.031 | 2.956 | 2.987 |
| 0.007 | 0.157 | -2.305 | -0.740 | 5.731 | 6.471 |
| 0.148 | 0.332 | -4.725 | -0.479 | 4.995 | 5.474 |
| 0.613 | 0.758 | -5.594 | 0.119  | 6.915 | 6.796 |
| 0.437 | 0.621 | -5.429 | 0.228  | 4.307 | 4.079 |
| 0.091 | 0.267 | -4.373 | 1.308  | 6.018 | 4.711 |
| 0.117 | 0.297 | -4.557 | 0.385  | 5.610 | 5.226 |
| 0.115 | 0.295 | -4.546 | 0.501  | 4.224 | 3.723 |

|       |       |        |        |       |       |
|-------|-------|--------|--------|-------|-------|
| 0.473 | 0.652 | -5.471 | 0.192  | 2.573 | 2.381 |
| 0.016 | 0.162 | -3.025 | -0.804 | 2.142 | 2.947 |
| 0.642 | 0.780 | -5.612 | 0.118  | 2.593 | 2.475 |
| 0.094 | 0.271 | -4.398 | -0.444 | 5.238 | 5.682 |
| 0.968 | 0.984 | -5.714 | -0.012 | 2.083 | 2.094 |
| 0.028 | 0.178 | -3.465 | -0.772 | 6.830 | 7.602 |
| 0.064 | 0.228 | -4.104 | -0.629 | 7.570 | 8.200 |
| 0.001 | 0.157 | -0.762 | -0.802 | 3.008 | 3.810 |
| 0.807 | 0.891 | -5.686 | 0.074  | 2.892 | 2.818 |
| 0.091 | 0.266 | -4.369 | -0.421 | 8.536 | 8.957 |
| 0.222 | 0.419 | -5.012 | -0.391 | 7.817 | 8.208 |
| 0.396 | 0.584 | -5.375 | -0.219 | 6.986 | 7.204 |
| 0.094 | 0.270 | -4.394 | -0.436 | 8.144 | 8.580 |
| 0.075 | 0.244 | -4.225 | -0.442 | 8.601 | 9.044 |
| 0.136 | 0.319 | -4.665 | -0.365 | 8.509 | 8.874 |
| 0.105 | 0.283 | -4.477 | -0.580 | 5.076 | 5.657 |
| 0.047 | 0.204 | -3.861 | -0.479 | 7.010 | 7.488 |
| 0.016 | 0.162 | -2.998 | -0.778 | 4.674 | 5.452 |
| 0.017 | 0.162 | -3.046 | 0.929  | 5.805 | 4.876 |
| 0.214 | 0.409 | -4.987 | 0.311  | 3.648 | 3.338 |
| 0.825 | 0.901 | -5.692 | -0.068 | 3.409 | 3.476 |
| 0.369 | 0.559 | -5.333 | -0.328 | 2.608 | 2.936 |
| 0.991 | 0.996 | -5.715 | -0.005 | 5.447 | 5.452 |
| 0.468 | 0.647 | -5.465 | -0.217 | 2.683 | 2.900 |
| 0.026 | 0.176 | -3.399 | 0.770  | 9.428 | 8.657 |
| 0.066 | 0.231 | -4.128 | 1.081  | 7.683 | 6.603 |
| 0.469 | 0.648 | -5.466 | -0.465 | 5.544 | 6.009 |
| 0.049 | 0.207 | -3.901 | 0.852  | 6.596 | 5.743 |
| 0.887 | 0.938 | -5.705 | 0.028  | 2.618 | 2.590 |
| 0.098 | 0.274 | -4.424 | 0.649  | 4.688 | 4.039 |
| 0.025 | 0.175 | -3.371 | 1.214  | 6.145 | 4.930 |
| 0.316 | 0.514 | -5.240 | 0.342  | 4.266 | 3.924 |
| 0.017 | 0.162 | -3.069 | 0.741  | 3.547 | 2.806 |
| 0.732 | 0.843 | -5.659 | 0.101  | 5.920 | 5.819 |
| 0.217 | 0.412 | -4.995 | 0.477  | 5.616 | 5.139 |
| 0.057 | 0.218 | -4.011 | 0.580  | 7.082 | 6.502 |
| 0.166 | 0.356 | -4.810 | 0.303  | 6.744 | 6.441 |
| 0.019 | 0.164 | -3.136 | 1.543  | 5.508 | 3.965 |
| 0.011 | 0.157 | -2.684 | 0.610  | 5.184 | 4.574 |
| 0.570 | 0.726 | -5.562 | -0.156 | 2.372 | 2.528 |
| 0.643 | 0.780 | -5.613 | 0.114  | 5.536 | 5.421 |
| 0.099 | 0.275 | -4.430 | 0.394  | 6.345 | 5.951 |
| 0.947 | 0.973 | -5.713 | 0.020  | 3.723 | 3.703 |
| 0.219 | 0.415 | -5.002 | 0.496  | 4.566 | 4.070 |
| 0.874 | 0.932 | -5.703 | -0.070 | 2.734 | 2.804 |
| 0.629 | 0.770 | -5.604 | 0.132  | 5.986 | 5.854 |
| 0.007 | 0.157 | -2.269 | -0.781 | 5.430 | 6.211 |
| 0.014 | 0.160 | -2.893 | 0.575  | 9.182 | 8.606 |
| 0.069 | 0.236 | -4.162 | 0.485  | 3.615 | 3.130 |
| 0.561 | 0.719 | -5.554 | 0.269  | 4.640 | 4.372 |

|       |       |        |        |       |       |
|-------|-------|--------|--------|-------|-------|
| 0.548 | 0.709 | -5.544 | 0.191  | 3.369 | 3.178 |
| 0.336 | 0.532 | -5.277 | 0.329  | 2.770 | 2.441 |
| 0.744 | 0.851 | -5.664 | 0.093  | 2.589 | 2.496 |
| 0.248 | 0.446 | -5.084 | 0.262  | 5.685 | 5.424 |
| 0.971 | 0.986 | -5.714 | 0.011  | 3.595 | 3.584 |
| 0.005 | 0.157 | -2.077 | 2.340  | 9.342 | 7.002 |
| 0.875 | 0.932 | -5.703 | -0.043 | 5.016 | 5.059 |
| 0.122 | 0.303 | -4.588 | 0.865  | 6.354 | 5.489 |
| 0.024 | 0.173 | -3.316 | 1.266  | 9.926 | 8.660 |
| 0.026 | 0.175 | -3.380 | 0.781  | 6.414 | 5.633 |
| 0.329 | 0.525 | -5.265 | -0.232 | 4.174 | 4.406 |
| 0.047 | 0.204 | -3.861 | 0.918  | 6.450 | 5.532 |
| 0.025 | 0.175 | -3.355 | 0.835  | 6.229 | 5.394 |
| 0.022 | 0.171 | -3.263 | 0.921  | 8.474 | 7.553 |
| 0.051 | 0.208 | -3.922 | 0.681  | 7.669 | 6.988 |
| 0.252 | 0.450 | -5.096 | -0.461 | 3.664 | 4.126 |
| 0.108 | 0.287 | -4.500 | 0.749  | 9.426 | 8.677 |
| 0.083 | 0.255 | -4.300 | 0.785  | 9.634 | 8.849 |
| 0.250 | 0.447 | -5.089 | 0.384  | 3.579 | 3.195 |
| 0.028 | 0.178 | -3.457 | 0.722  | 7.711 | 6.989 |
| 0.139 | 0.324 | -4.684 | -0.499 | 4.574 | 5.073 |
| 0.027 | 0.176 | -3.429 | -0.538 | 3.833 | 4.371 |
| 0.307 | 0.504 | -5.221 | 0.395  | 4.136 | 3.741 |
| 0.079 | 0.249 | -4.263 | 0.470  | 7.156 | 6.686 |
| 0.256 | 0.454 | -5.106 | -0.322 | 6.356 | 6.678 |
| 0.023 | 0.173 | -3.290 | 0.816  | 6.779 | 5.964 |
| 0.663 | 0.795 | -5.625 | -0.127 | 4.362 | 4.488 |
| 0.088 | 0.262 | -4.344 | -0.515 | 2.396 | 2.911 |
| 0.101 | 0.278 | -4.448 | -0.494 | 3.349 | 3.843 |
| 0.147 | 0.331 | -4.723 | 0.425  | 2.375 | 1.950 |
| 0.013 | 0.160 | -2.837 | 0.805  | 6.451 | 5.645 |
| 0.025 | 0.174 | -3.350 | 0.744  | 5.847 | 5.103 |
| 0.422 | 0.608 | -5.409 | 0.220  | 4.942 | 4.722 |
| 0.417 | 0.604 | -5.403 | -0.249 | 5.968 | 6.217 |
| 0.034 | 0.185 | -3.613 | 0.659  | 7.807 | 7.148 |
| 0.448 | 0.630 | -5.443 | 0.262  | 3.184 | 2.922 |
| 0.076 | 0.245 | -4.236 | -0.435 | 2.926 | 3.361 |
| 0.084 | 0.256 | -4.306 | 0.525  | 4.891 | 4.366 |
| 0.029 | 0.178 | -3.471 | 1.276  | 6.477 | 5.201 |
| 0.128 | 0.309 | -4.622 | -0.413 | 2.419 | 2.833 |
| 0.330 | 0.526 | -5.266 | -0.222 | 3.249 | 3.471 |
| 0.536 | 0.698 | -5.533 | -0.160 | 4.381 | 4.541 |
| 0.135 | 0.319 | -4.664 | 0.283  | 8.740 | 8.457 |
| 0.139 | 0.323 | -4.683 | 0.348  | 9.783 | 9.435 |
| 0.062 | 0.224 | -4.071 | 0.618  | 3.526 | 2.908 |
| 0.002 | 0.157 | -1.076 | 0.931  | 3.574 | 2.643 |
| 0.019 | 0.164 | -3.125 | 0.743  | 3.431 | 2.687 |
| 0.154 | 0.341 | -4.757 | 0.344  | 5.379 | 5.035 |
| 0.028 | 0.177 | -3.442 | 0.636  | 5.663 | 5.027 |
| 0.490 | 0.664 | -5.490 | 0.170  | 6.410 | 6.240 |



|       |       |        |        |       |       |
|-------|-------|--------|--------|-------|-------|
| 0.125 | 0.306 | -4.606 | -0.573 | 6.110 | 6.683 |
| 0.339 | 0.534 | -5.283 | 0.359  | 3.187 | 2.828 |
| 0.452 | 0.633 | -5.448 | -0.215 | 2.041 | 2.256 |
| 0.931 | 0.963 | -5.711 | -0.024 | 3.842 | 3.866 |
| 0.190 | 0.382 | -4.902 | -0.436 | 4.006 | 4.442 |
| 0.014 | 0.160 | -2.874 | 1.333  | 4.862 | 3.528 |
| 0.984 | 0.991 | -5.715 | -0.006 | 2.245 | 2.251 |
| 0.116 | 0.296 | -4.551 | -0.420 | 6.794 | 7.214 |
| 0.062 | 0.224 | -4.075 | 0.575  | 6.069 | 5.494 |
| 0.184 | 0.375 | -4.882 | 0.482  | 3.772 | 3.290 |
| 0.267 | 0.465 | -5.133 | 0.373  | 4.671 | 4.298 |
| 0.564 | 0.721 | -5.557 | 0.134  | 3.374 | 3.240 |
| 0.113 | 0.292 | -4.532 | 0.540  | 4.761 | 4.221 |
| 0.022 | 0.169 | -3.244 | 1.226  | 5.429 | 4.203 |
| 0.620 | 0.763 | -5.598 | -0.140 | 3.586 | 3.726 |
| 0.032 | 0.183 | -3.562 | 0.583  | 2.483 | 1.900 |
| 0.039 | 0.192 | -3.706 | 0.581  | 4.422 | 3.841 |
| 0.015 | 0.160 | -2.938 | -0.710 | 4.140 | 4.851 |
| 0.196 | 0.390 | -4.926 | -0.366 | 2.750 | 3.115 |
| 0.700 | 0.821 | -5.645 | -0.110 | 3.557 | 3.667 |
| 0.557 | 0.716 | -5.552 | 0.159  | 2.959 | 2.800 |
| 0.254 | 0.452 | -5.101 | 0.297  | 2.279 | 1.982 |
| 0.758 | 0.860 | -5.670 | -0.088 | 5.197 | 5.285 |
| 0.435 | 0.619 | -5.426 | -0.230 | 2.412 | 2.642 |
| 0.086 | 0.258 | -4.326 | 0.680  | 3.791 | 3.111 |
| 0.100 | 0.277 | -4.442 | 0.538  | 4.222 | 3.685 |
| 0.938 | 0.967 | -5.712 | 0.023  | 3.297 | 3.274 |
| 0.197 | 0.392 | -4.930 | -0.343 | 2.180 | 2.523 |
| 0.179 | 0.370 | -4.864 | -0.359 | 2.703 | 3.062 |
| 0.025 | 0.175 | -3.356 | 0.553  | 7.460 | 6.906 |
| 0.144 | 0.329 | -4.710 | 0.375  | 5.838 | 5.463 |
| 0.165 | 0.353 | -4.803 | -0.452 | 2.374 | 2.826 |
| 0.312 | 0.509 | -5.231 | 0.527  | 7.258 | 6.731 |
| 0.434 | 0.618 | -5.425 | -0.179 | 8.335 | 8.514 |
| 0.009 | 0.157 | -2.564 | 1.566  | 5.443 | 3.876 |
| 0.010 | 0.157 | -2.651 | 0.566  | 5.864 | 5.298 |
| 0.125 | 0.306 | -4.605 | 0.308  | 6.386 | 6.078 |
| 0.019 | 0.164 | -3.146 | 0.863  | 5.969 | 5.105 |
| 0.118 | 0.298 | -4.564 | 0.555  | 7.098 | 6.542 |
| 0.025 | 0.175 | -3.376 | 1.299  | 6.069 | 4.770 |
| 0.976 | 0.988 | -5.714 | 0.010  | 2.680 | 2.670 |
| 0.640 | 0.779 | -5.611 | 0.148  | 2.676 | 2.528 |
| 0.856 | 0.923 | -5.699 | 0.066  | 2.827 | 2.761 |
| 0.149 | 0.334 | -4.732 | 0.410  | 4.083 | 3.673 |
| 0.466 | 0.645 | -5.463 | -0.230 | 3.218 | 3.448 |
| 0.010 | 0.157 | -2.613 | -0.980 | 5.577 | 6.557 |
| 0.001 | 0.157 | -0.510 | -1.223 | 3.936 | 5.158 |
| 0.027 | 0.176 | -3.420 | -1.064 | 4.027 | 5.090 |
| 0.116 | 0.296 | -4.553 | 0.827  | 4.148 | 3.320 |
| 0.672 | 0.803 | -5.630 | 0.126  | 7.258 | 7.131 |

|       |       |        |        |       |       |
|-------|-------|--------|--------|-------|-------|
| 0.119 | 0.299 | -4.572 | 0.296  | 7.389 | 7.093 |
| 0.465 | 0.645 | -5.462 | -0.329 | 6.907 | 7.236 |
| 0.009 | 0.157 | -2.567 | 1.346  | 8.112 | 6.766 |
| 0.204 | 0.398 | -4.951 | 0.462  | 5.200 | 4.739 |
| 0.063 | 0.226 | -4.088 | 0.849  | 5.498 | 4.648 |
| 0.152 | 0.339 | -4.748 | -0.426 | 3.034 | 3.460 |
| 0.006 | 0.157 | -2.183 | 1.181  | 5.820 | 4.639 |
| 0.293 | 0.491 | -5.192 | 0.285  | 3.142 | 2.856 |
| 0.061 | 0.224 | -4.071 | 0.723  | 4.437 | 3.714 |
| 0.022 | 0.169 | -3.246 | 0.867  | 4.441 | 3.574 |
| 0.543 | 0.705 | -5.539 | 0.175  | 4.622 | 4.447 |
| 0.003 | 0.157 | -1.720 | 0.997  | 4.537 | 3.541 |
| 0.017 | 0.162 | -3.062 | 1.792  | 5.151 | 3.359 |
| 0.586 | 0.739 | -5.574 | -0.154 | 1.528 | 1.682 |
| 0.563 | 0.721 | -5.557 | -0.157 | 3.094 | 3.251 |
| 0.603 | 0.752 | -5.587 | -0.156 | 3.100 | 3.256 |
| 0.266 | 0.464 | -5.129 | -0.354 | 4.754 | 5.108 |
| 0.528 | 0.693 | -5.526 | -0.266 | 5.933 | 6.199 |
| 0.339 | 0.534 | -5.282 | -0.418 | 3.115 | 3.532 |
| 0.885 | 0.937 | -5.705 | 0.046  | 2.693 | 2.647 |
| 0.473 | 0.652 | -5.472 | -0.322 | 3.388 | 3.710 |
| 0.223 | 0.419 | -5.013 | -0.473 | 4.192 | 4.665 |
| 0.642 | 0.780 | -5.612 | 0.168  | 2.946 | 2.778 |
| 0.417 | 0.604 | -5.403 | -0.233 | 3.005 | 3.237 |
| 0.053 | 0.214 | -3.963 | -0.742 | 2.550 | 3.292 |
| 0.112 | 0.290 | -4.522 | -0.988 | 2.233 | 3.222 |
| 0.070 | 0.237 | -4.175 | -0.838 | 2.434 | 3.272 |
| 0.252 | 0.450 | -5.095 | 0.398  | 2.544 | 2.146 |
| 0.209 | 0.404 | -4.970 | 0.341  | 3.575 | 3.234 |
| 0.044 | 0.201 | -3.819 | -1.166 | 1.412 | 2.578 |
| 0.773 | 0.870 | -5.675 | -0.082 | 3.137 | 3.219 |
| 0.127 | 0.308 | -4.619 | -0.387 | 2.741 | 3.127 |
| 0.035 | 0.186 | -3.625 | 0.494  | 6.078 | 5.584 |
| 0.081 | 0.252 | -4.278 | 0.324  | 6.364 | 6.040 |
| 0.116 | 0.296 | -4.551 | 0.480  | 3.580 | 3.100 |
| 0.018 | 0.163 | -3.105 | -0.614 | 3.954 | 4.568 |
| 0.079 | 0.249 | -4.260 | 0.491  | 3.502 | 3.010 |
| 0.625 | 0.767 | -5.602 | -0.143 | 6.493 | 6.636 |
| 0.023 | 0.173 | -3.299 | 0.733  | 6.177 | 5.444 |
| 0.036 | 0.188 | -3.650 | 0.604  | 6.729 | 6.125 |
| 0.816 | 0.896 | -5.689 | -0.073 | 2.487 | 2.559 |
| 0.022 | 0.169 | -3.248 | 0.582  | 5.034 | 4.452 |
| 0.101 | 0.278 | -4.447 | -0.439 | 3.208 | 3.647 |
| 0.315 | 0.513 | -5.238 | -0.259 | 2.718 | 2.976 |
| 0.978 | 0.989 | -5.714 | 0.008  | 4.447 | 4.439 |
| 0.949 | 0.974 | -5.713 | -0.017 | 1.634 | 1.651 |
| 0.128 | 0.309 | -4.622 | 0.690  | 5.613 | 4.923 |
| 0.342 | 0.537 | -5.288 | 0.234  | 8.226 | 7.992 |
| 0.207 | 0.402 | -4.963 | 0.391  | 3.016 | 2.625 |
| 0.002 | 0.157 | -1.194 | 1.254  | 4.061 | 2.808 |

|       |       |        |        |       |       |
|-------|-------|--------|--------|-------|-------|
| 0.580 | 0.735 | -5.570 | 0.173  | 3.598 | 3.425 |
| 0.058 | 0.219 | -4.026 | 0.524  | 3.375 | 2.850 |
| 0.012 | 0.159 | -2.743 | 0.658  | 5.816 | 5.158 |
| 0.263 | 0.461 | -5.123 | -0.229 | 6.220 | 6.449 |
| 0.010 | 0.157 | -2.648 | -0.789 | 6.210 | 6.999 |
| 0.031 | 0.181 | -3.536 | 0.600  | 4.413 | 3.813 |
| 0.086 | 0.258 | -4.327 | -0.447 | 2.401 | 2.847 |
| 0.055 | 0.216 | -3.992 | 0.477  | 8.196 | 7.719 |
| 0.226 | 0.423 | -5.022 | -0.391 | 2.272 | 2.663 |
| 0.588 | 0.741 | -5.576 | 0.177  | 2.540 | 2.363 |
| 0.003 | 0.157 | -1.508 | 1.133  | 7.793 | 6.660 |
| 0.061 | 0.224 | -4.071 | 0.674  | 8.546 | 7.872 |
| 0.576 | 0.731 | -5.567 | 0.217  | 3.277 | 3.060 |
| 0.766 | 0.866 | -5.673 | 0.104  | 3.926 | 3.822 |
| 0.159 | 0.347 | -4.777 | -0.372 | 2.333 | 2.705 |
| 0.542 | 0.704 | -5.539 | -0.143 | 1.984 | 2.126 |
| 0.699 | 0.820 | -5.644 | -0.102 | 2.855 | 2.956 |
| 0.181 | 0.372 | -4.870 | 0.374  | 4.142 | 3.768 |
| 0.112 | 0.291 | -4.525 | 0.763  | 3.035 | 2.272 |
| 0.021 | 0.168 | -3.230 | -0.856 | 5.872 | 6.728 |
| 0.110 | 0.289 | -4.514 | -0.523 | 4.840 | 5.362 |
| 0.312 | 0.509 | -5.232 | -0.495 | 5.302 | 5.797 |
| 0.235 | 0.431 | -5.047 | -0.578 | 4.428 | 5.006 |
| 0.638 | 0.777 | -5.610 | -0.119 | 4.338 | 4.457 |
| 0.030 | 0.179 | -3.503 | -0.915 | 6.119 | 7.035 |
| 0.777 | 0.872 | -5.677 | -0.084 | 2.438 | 2.522 |
| 0.004 | 0.157 | -1.861 | 1.064  | 2.834 | 1.769 |
| 0.040 | 0.194 | -3.744 | 1.049  | 4.145 | 3.096 |
| 0.058 | 0.219 | -4.023 | -0.574 | 3.516 | 4.090 |
| 0.333 | 0.529 | -5.271 | 0.253  | 4.265 | 4.012 |
| 0.031 | 0.180 | -3.526 | -0.715 | 2.625 | 3.340 |
| 0.009 | 0.157 | -2.542 | -0.702 | 5.248 | 5.950 |
| 0.047 | 0.204 | -3.870 | 1.262  | 7.877 | 6.615 |
| 0.215 | 0.410 | -4.990 | -0.400 | 4.818 | 5.218 |
| 0.082 | 0.254 | -4.294 | -0.755 | 7.252 | 8.007 |
| 0.276 | 0.475 | -5.155 | 0.205  | 9.080 | 8.876 |
| 0.294 | 0.491 | -5.194 | 0.291  | 4.603 | 4.313 |
| 0.387 | 0.575 | -5.360 | -0.182 | 4.648 | 4.830 |
| 0.089 | 0.264 | -4.357 | 0.435  | 2.512 | 2.077 |
| 0.799 | 0.887 | -5.684 | 0.069  | 5.842 | 5.773 |
| 0.015 | 0.160 | -2.957 | -0.974 | 7.499 | 8.473 |
| 0.004 | 0.157 | -1.846 | 1.187  | 8.716 | 7.528 |
| 0.173 | 0.362 | -4.837 | -0.350 | 5.818 | 6.168 |
| 0.041 | 0.196 | -3.763 | 1.033  | 7.306 | 6.273 |
| 0.014 | 0.160 | -2.908 | 1.521  | 6.814 | 5.293 |
| 0.030 | 0.180 | -3.520 | -0.551 | 3.560 | 4.111 |
| 0.236 | 0.433 | -5.051 | 0.265  | 5.491 | 5.226 |
| 0.568 | 0.724 | -5.561 | -0.151 | 4.779 | 4.930 |
| 0.120 | 0.300 | -4.576 | 0.424  | 7.363 | 6.939 |
| 0.711 | 0.828 | -5.650 | -0.109 | 5.159 | 5.269 |

|       |       |        |        |       |       |
|-------|-------|--------|--------|-------|-------|
| 0.031 | 0.180 | -3.527 | 0.532  | 3.299 | 2.767 |
| 0.060 | 0.222 | -4.055 | 0.600  | 5.934 | 5.334 |
| 0.127 | 0.308 | -4.619 | 0.741  | 5.578 | 4.836 |
| 0.352 | 0.547 | -5.305 | 0.178  | 5.980 | 5.802 |
| 0.911 | 0.952 | -5.709 | -0.031 | 3.503 | 3.534 |
| 0.257 | 0.455 | -5.108 | -0.427 | 2.068 | 2.495 |
| 0.400 | 0.588 | -5.380 | 0.237  | 4.794 | 4.557 |
| 0.027 | 0.176 | -3.429 | -0.768 | 5.435 | 6.203 |
| 0.619 | 0.763 | -5.598 | 0.154  | 4.807 | 4.654 |
| 0.002 | 0.157 | -1.347 | -1.283 | 6.681 | 7.964 |
| 0.028 | 0.177 | -3.443 | -0.727 | 4.306 | 5.034 |
| 0.029 | 0.178 | -3.481 | -0.493 | 5.038 | 5.531 |
| 0.008 | 0.157 | -2.453 | -0.668 | 4.365 | 5.033 |
| 0.117 | 0.298 | -4.560 | 0.497  | 5.414 | 4.917 |
| 0.046 | 0.203 | -3.843 | -0.532 | 1.644 | 2.176 |
| 0.173 | 0.362 | -4.837 | -0.432 | 3.569 | 4.001 |
| 0.329 | 0.525 | -5.265 | 0.226  | 5.609 | 5.382 |
| 0.047 | 0.204 | -3.861 | 0.570  | 6.796 | 6.226 |
| 0.046 | 0.203 | -3.841 | 1.306  | 9.130 | 7.824 |
| 0.356 | 0.550 | -5.311 | -0.246 | 4.212 | 4.458 |
| 0.432 | 0.617 | -5.423 | 0.228  | 5.654 | 5.425 |
| 0.057 | 0.218 | -4.008 | 0.468  | 5.316 | 4.847 |
| 0.021 | 0.168 | -3.219 | -0.796 | 6.559 | 7.355 |
| 0.543 | 0.705 | -5.540 | -0.145 | 4.372 | 4.517 |
| 0.646 | 0.783 | -5.615 | 0.127  | 3.403 | 3.277 |
| 0.002 | 0.157 | -1.348 | 1.736  | 4.973 | 3.237 |
| 0.175 | 0.364 | -4.846 | -0.401 | 2.588 | 2.989 |
| 0.178 | 0.368 | -4.857 | -0.418 | 1.871 | 2.289 |
| 0.240 | 0.437 | -5.061 | -0.372 | 2.845 | 3.216 |
| 0.490 | 0.664 | -5.489 | -0.243 | 1.613 | 1.856 |
| 0.447 | 0.629 | -5.442 | -0.245 | 2.089 | 2.334 |
| 0.289 | 0.488 | -5.184 | -0.351 | 2.990 | 3.341 |
| 0.744 | 0.851 | -5.664 | 0.082  | 4.809 | 4.727 |
| 0.140 | 0.324 | -4.686 | -0.479 | 4.070 | 4.548 |
| 0.015 | 0.161 | -2.970 | -0.917 | 3.573 | 4.490 |
| 0.444 | 0.627 | -5.438 | -0.190 | 4.812 | 5.001 |
| 0.058 | 0.220 | -4.029 | -0.518 | 3.032 | 3.550 |
| 0.341 | 0.537 | -5.287 | -0.266 | 3.387 | 3.653 |
| 0.037 | 0.190 | -3.675 | -0.644 | 5.836 | 6.479 |
| 0.255 | 0.452 | -5.103 | 0.248  | 5.665 | 5.416 |
| 0.116 | 0.296 | -4.552 | 0.444  | 8.093 | 7.649 |
| 0.438 | 0.622 | -5.431 | 0.477  | 5.222 | 4.745 |
| 0.329 | 0.524 | -5.263 | -0.302 | 4.360 | 4.662 |
| 0.832 | 0.906 | -5.694 | 0.051  | 5.324 | 5.272 |
| 0.090 | 0.265 | -4.364 | 0.772  | 5.933 | 5.161 |
| 0.123 | 0.304 | -4.597 | 0.434  | 2.855 | 2.421 |
| 0.030 | 0.179 | -3.507 | 0.831  | 7.094 | 6.263 |
| 0.051 | 0.208 | -3.923 | 1.318  | 6.480 | 5.162 |
| 0.383 | 0.572 | -5.355 | -0.223 | 8.818 | 9.041 |
| 0.294 | 0.491 | -5.194 | 0.287  | 6.294 | 6.007 |

|       |       |        |        |       |       |
|-------|-------|--------|--------|-------|-------|
| 0.073 | 0.241 | -4.208 | 0.567  | 6.195 | 5.628 |
| 0.020 | 0.167 | -3.178 | 0.685  | 4.666 | 3.981 |
| 0.265 | 0.463 | -5.129 | 0.318  | 5.833 | 5.515 |
| 0.540 | 0.702 | -5.537 | 0.167  | 4.983 | 4.816 |
| 0.756 | 0.859 | -5.669 | -0.099 | 3.847 | 3.946 |
| 0.043 | 0.200 | -3.799 | 0.549  | 5.431 | 4.882 |
| 0.044 | 0.201 | -3.811 | 0.569  | 4.474 | 3.904 |
| 0.770 | 0.868 | -5.674 | 0.089  | 4.263 | 4.174 |
| 0.637 | 0.776 | -5.609 | 0.190  | 5.636 | 5.446 |
| 0.615 | 0.759 | -5.595 | 0.200  | 5.108 | 4.908 |
| 0.868 | 0.928 | -5.702 | 0.054  | 4.318 | 4.264 |
| 0.298 | 0.495 | -5.204 | 0.268  | 2.763 | 2.495 |
| 0.194 | 0.387 | -4.918 | 0.372  | 4.166 | 3.793 |
| 0.139 | 0.323 | -4.681 | -0.430 | 4.080 | 4.510 |
| 0.036 | 0.188 | -3.645 | 0.600  | 5.887 | 5.287 |
| 0.348 | 0.543 | -5.298 | -0.313 | 2.591 | 2.904 |
| 0.585 | 0.738 | -5.574 | -0.143 | 2.109 | 2.252 |
| 0.011 | 0.158 | -2.708 | 1.440  | 7.434 | 5.994 |
| 0.128 | 0.309 | -4.621 | 0.317  | 6.681 | 6.364 |
| 0.026 | 0.176 | -3.391 | 0.548  | 7.748 | 7.200 |
| 0.254 | 0.451 | -5.099 | 0.305  | 3.605 | 3.300 |
| 0.625 | 0.767 | -5.601 | 0.120  | 1.911 | 1.791 |
| 0.981 | 0.990 | -5.715 | -0.007 | 1.888 | 1.895 |
| 0.083 | 0.255 | -4.305 | 0.825  | 4.266 | 3.440 |
| 0.328 | 0.524 | -5.262 | 0.580  | 6.520 | 5.940 |
| 0.015 | 0.160 | -2.930 | 1.560  | 6.668 | 5.108 |
| 0.327 | 0.523 | -5.260 | 0.276  | 6.492 | 6.216 |
| 0.132 | 0.315 | -4.647 | 0.971  | 8.033 | 7.061 |
| 0.011 | 0.159 | -2.725 | -1.191 | 3.919 | 5.110 |
| 0.008 | 0.157 | -2.459 | 0.753  | 2.620 | 1.867 |
| 0.277 | 0.475 | -5.155 | 0.222  | 7.107 | 6.885 |
| 0.092 | 0.268 | -4.382 | 0.406  | 5.307 | 4.901 |
| 0.593 | 0.745 | -5.579 | 0.107  | 6.803 | 6.696 |
| 0.129 | 0.310 | -4.628 | -0.591 | 2.729 | 3.320 |
| 0.060 | 0.221 | -4.048 | 0.529  | 4.591 | 4.062 |
| 0.137 | 0.321 | -4.675 | -0.635 | 4.657 | 5.292 |
| 0.172 | 0.362 | -4.834 | -0.300 | 5.255 | 5.554 |
| 0.141 | 0.325 | -4.692 | 0.511  | 6.301 | 5.789 |
| 0.227 | 0.424 | -5.026 | 0.319  | 2.784 | 2.465 |
| 0.056 | 0.218 | -4.002 | 0.928  | 7.557 | 6.629 |
| 0.019 | 0.164 | -3.136 | 1.045  | 7.385 | 6.340 |
| 0.088 | 0.261 | -4.342 | -0.572 | 5.070 | 5.643 |
| 0.020 | 0.167 | -3.186 | 1.150  | 6.017 | 4.866 |
| 0.274 | 0.472 | -5.150 | -0.245 | 4.174 | 4.419 |
| 0.266 | 0.464 | -5.129 | 0.313  | 5.096 | 4.783 |
| 0.038 | 0.191 | -3.686 | 0.602  | 5.699 | 5.097 |
| 0.075 | 0.243 | -4.221 | -0.420 | 4.960 | 5.380 |
| 0.064 | 0.227 | -4.097 | 0.470  | 4.429 | 3.959 |
| 0.218 | 0.412 | -4.997 | 0.425  | 4.018 | 3.593 |
| 0.217 | 0.412 | -4.995 | -0.461 | 4.296 | 4.757 |

|       |       |        |        |       |       |
|-------|-------|--------|--------|-------|-------|
| 0.803 | 0.889 | -5.685 | -0.059 | 4.826 | 4.885 |
| 0.973 | 0.986 | -5.714 | 0.009  | 6.719 | 6.710 |
| 0.026 | 0.176 | -3.405 | -0.769 | 5.781 | 6.550 |
| 0.147 | 0.332 | -4.724 | 0.354  | 7.381 | 7.027 |
| 0.005 | 0.157 | -1.969 | -0.735 | 4.295 | 5.030 |
| 0.106 | 0.284 | -4.483 | -0.438 | 4.100 | 4.538 |
| 0.909 | 0.951 | -5.709 | 0.060  | 3.591 | 3.531 |
| 0.061 | 0.223 | -4.061 | -0.586 | 5.813 | 6.399 |
| 0.592 | 0.744 | -5.579 | 0.172  | 4.512 | 4.340 |
| 0.121 | 0.302 | -4.583 | -0.822 | 4.266 | 5.088 |
| 0.253 | 0.451 | -5.098 | -0.385 | 5.308 | 5.694 |
| 0.014 | 0.160 | -2.922 | -0.750 | 5.116 | 5.866 |
| 0.123 | 0.304 | -4.592 | 0.360  | 4.537 | 4.178 |
| 0.624 | 0.766 | -5.601 | 0.155  | 6.226 | 6.071 |
| 0.050 | 0.208 | -3.914 | 0.683  | 6.787 | 6.103 |
| 0.014 | 0.160 | -2.904 | -0.938 | 6.464 | 7.402 |
| 0.616 | 0.760 | -5.595 | 0.196  | 4.956 | 4.760 |
| 0.017 | 0.162 | -3.072 | -0.593 | 3.597 | 4.190 |
| 0.929 | 0.961 | -5.711 | -0.028 | 2.876 | 2.904 |
| 0.287 | 0.485 | -5.179 | -0.244 | 4.407 | 4.652 |
| 0.005 | 0.157 | -2.087 | 1.136  | 5.526 | 4.390 |
| 0.583 | 0.737 | -5.572 | 0.129  | 5.116 | 4.987 |
| 0.198 | 0.392 | -4.933 | 0.274  | 8.035 | 7.761 |
| 0.833 | 0.907 | -5.694 | -0.066 | 3.670 | 3.736 |
| 0.009 | 0.157 | -2.546 | -0.715 | 5.633 | 6.349 |
| 0.015 | 0.161 | -2.975 | 0.657  | 8.559 | 7.902 |
| 0.447 | 0.629 | -5.441 | -0.213 | 2.613 | 2.826 |
| 0.056 | 0.217 | -3.995 | 0.637  | 7.332 | 6.695 |
| 0.589 | 0.741 | -5.576 | 0.189  | 1.990 | 1.801 |
| 0.854 | 0.921 | -5.699 | -0.045 | 5.707 | 5.753 |
| 0.016 | 0.162 | -2.995 | 0.962  | 7.268 | 6.306 |
| 0.685 | 0.811 | -5.637 | -0.116 | 3.311 | 3.427 |
| 0.023 | 0.173 | -3.310 | 0.809  | 5.440 | 4.631 |
| 0.402 | 0.589 | -5.382 | -0.228 | 3.429 | 3.657 |
| 0.814 | 0.895 | -5.689 | 0.076  | 8.088 | 8.012 |
| 0.314 | 0.511 | -5.235 | 0.331  | 7.166 | 6.835 |
| 0.345 | 0.541 | -5.294 | 0.289  | 4.514 | 4.226 |
| 0.426 | 0.612 | -5.415 | -0.187 | 6.554 | 6.741 |
| 0.050 | 0.208 | -3.914 | 0.442  | 5.669 | 5.226 |
| 0.099 | 0.275 | -4.430 | -0.735 | 1.781 | 2.516 |
| 0.711 | 0.828 | -5.650 | -0.111 | 5.810 | 5.921 |
| 0.361 | 0.553 | -5.321 | 0.256  | 4.167 | 3.910 |
| 0.699 | 0.820 | -5.644 | -0.105 | 6.061 | 6.166 |
| 0.540 | 0.702 | -5.537 | 0.145  | 2.462 | 2.317 |
| 0.257 | 0.455 | -5.109 | 0.232  | 6.999 | 6.768 |
| 0.078 | 0.247 | -4.251 | -0.450 | 3.467 | 3.917 |
| 0.073 | 0.241 | -4.200 | -0.431 | 5.053 | 5.484 |
| 0.833 | 0.907 | -5.694 | -0.046 | 7.928 | 7.974 |
| 0.943 | 0.970 | -5.712 | -0.020 | 3.592 | 3.612 |
| 0.192 | 0.385 | -4.911 | 0.300  | 5.243 | 4.943 |

|       |       |        |        |       |       |
|-------|-------|--------|--------|-------|-------|
| 0.254 | 0.452 | -5.100 | 0.332  | 5.891 | 5.559 |
| 0.979 | 0.989 | -5.714 | 0.007  | 7.007 | 7.000 |
| 0.044 | 0.200 | -3.803 | 0.516  | 4.901 | 4.385 |
| 0.292 | 0.489 | -5.189 | 0.290  | 7.780 | 7.490 |
| 0.134 | 0.318 | -4.659 | -0.333 | 8.007 | 8.340 |
| 0.026 | 0.176 | -3.406 | 0.477  | 8.194 | 7.717 |
| 0.024 | 0.173 | -3.335 | -0.973 | 4.107 | 5.080 |
| 0.998 | 0.999 | -5.715 | -0.001 | 3.677 | 3.678 |
| 0.344 | 0.539 | -5.292 | 0.231  | 5.025 | 4.793 |
| 0.793 | 0.883 | -5.682 | -0.062 | 6.812 | 6.874 |
| 0.966 | 0.983 | -5.714 | -0.012 | 4.161 | 4.173 |
| 0.015 | 0.160 | -2.930 | -0.614 | 3.233 | 3.847 |
| 0.493 | 0.666 | -5.492 | 0.125  | 5.628 | 5.503 |
| 0.073 | 0.241 | -4.204 | 0.606  | 7.018 | 6.412 |
| 0.138 | 0.321 | -4.675 | -0.388 | 4.142 | 4.530 |
| 0.981 | 0.990 | -5.715 | -0.007 | 5.947 | 5.954 |
| 0.006 | 0.157 | -2.254 | 1.547  | 7.841 | 6.294 |
| 0.320 | 0.517 | -5.247 | -0.268 | 2.467 | 2.735 |
| 0.065 | 0.229 | -4.115 | 0.483  | 6.243 | 5.760 |
| 0.154 | 0.341 | -4.754 | -0.285 | 5.491 | 5.775 |
| 0.011 | 0.157 | -2.702 | 1.318  | 5.538 | 4.221 |
| 0.014 | 0.160 | -2.909 | -0.587 | 6.126 | 6.714 |
| 0.024 | 0.173 | -3.340 | -0.512 | 6.089 | 6.601 |
| 0.260 | 0.458 | -5.116 | -0.267 | 5.135 | 5.402 |
| 0.934 | 0.964 | -5.712 | -0.018 | 1.815 | 1.833 |
| 0.337 | 0.532 | -5.278 | 0.195  | 6.440 | 6.246 |
| 0.030 | 0.179 | -3.502 | -0.568 | 5.092 | 5.660 |
| 0.417 | 0.604 | -5.403 | -0.200 | 4.939 | 5.139 |
| 0.038 | 0.192 | -3.701 | -0.537 | 4.920 | 5.457 |
| 0.548 | 0.709 | -5.543 | -0.184 | 3.369 | 3.553 |
| 0.144 | 0.327 | -4.706 | -0.414 | 3.736 | 4.150 |
| 0.020 | 0.166 | -3.166 | -0.810 | 3.590 | 4.401 |
| 0.058 | 0.219 | -4.020 | 0.670  | 3.207 | 2.537 |
| 0.009 | 0.157 | -2.491 | -0.736 | 7.654 | 8.390 |
| 0.125 | 0.306 | -4.606 | 0.395  | 6.945 | 6.550 |
| 0.952 | 0.975 | -5.713 | 0.015  | 4.234 | 4.220 |
| 0.082 | 0.253 | -4.288 | -0.376 | 4.455 | 4.832 |
| 0.064 | 0.228 | -4.105 | 0.446  | 5.523 | 5.076 |
| 0.573 | 0.728 | -5.564 | 0.128  | 5.373 | 5.245 |
| 0.059 | 0.221 | -4.040 | -0.639 | 3.519 | 4.158 |
| 0.014 | 0.160 | -2.903 | 1.482  | 8.135 | 6.653 |
| 0.158 | 0.346 | -4.776 | -0.404 | 7.503 | 7.907 |
| 0.042 | 0.196 | -3.766 | -0.560 | 4.140 | 4.700 |
| 0.093 | 0.268 | -4.383 | 1.240  | 4.123 | 2.883 |
| 0.008 | 0.157 | -2.418 | -1.211 | 2.845 | 4.056 |
| 0.209 | 0.404 | -4.969 | 0.275  | 7.561 | 7.286 |
| 0.004 | 0.157 | -1.820 | -0.984 | 3.660 | 4.644 |
| 0.881 | 0.935 | -5.704 | -0.039 | 3.540 | 3.579 |
| 0.044 | 0.200 | -3.807 | 0.730  | 8.983 | 8.252 |
| 0.055 | 0.216 | -3.987 | 0.614  | 7.402 | 6.788 |

|       |       |        |        |       |       |
|-------|-------|--------|--------|-------|-------|
| 0.122 | 0.304 | -4.590 | 0.552  | 8.687 | 8.135 |
| 0.026 | 0.175 | -3.386 | 0.899  | 6.353 | 5.453 |
| 0.233 | 0.430 | -5.044 | 0.309  | 3.704 | 3.395 |
| 0.054 | 0.214 | -3.964 | -0.568 | 4.170 | 4.739 |
| 0.040 | 0.194 | -3.739 | -1.172 | 4.534 | 5.706 |
| 0.689 | 0.814 | -5.639 | -0.124 | 3.243 | 3.368 |
| 0.967 | 0.983 | -5.714 | 0.013  | 3.970 | 3.958 |
| 0.082 | 0.254 | -4.296 | -0.478 | 3.829 | 4.307 |
| 0.020 | 0.167 | -3.196 | -0.715 | 5.713 | 6.429 |
| 0.358 | 0.551 | -5.315 | -0.258 | 5.821 | 6.080 |
| 0.011 | 0.157 | -2.697 | -0.633 | 6.709 | 7.341 |
| 0.582 | 0.736 | -5.571 | 0.176  | 5.323 | 5.147 |
| 0.324 | 0.520 | -5.254 | 0.253  | 2.256 | 2.003 |
| 0.712 | 0.828 | -5.650 | -0.131 | 4.869 | 5.000 |
| 0.033 | 0.184 | -3.593 | 0.452  | 7.477 | 7.024 |
| 0.186 | 0.378 | -4.890 | 0.261  | 6.739 | 6.479 |
| 0.771 | 0.868 | -5.675 | 0.116  | 5.016 | 4.900 |
| 0.119 | 0.298 | -4.568 | 0.334  | 9.127 | 8.793 |
| 0.063 | 0.226 | -4.088 | 0.427  | 6.011 | 5.585 |
| 0.007 | 0.157 | -2.356 | 0.629  | 5.854 | 5.225 |
| 0.004 | 0.157 | -1.840 | -0.808 | 2.832 | 3.639 |
| 0.046 | 0.203 | -3.845 | -0.530 | 1.615 | 2.145 |
| 0.135 | 0.319 | -4.662 | -0.412 | 2.132 | 2.544 |
| 0.715 | 0.831 | -5.652 | 0.128  | 5.437 | 5.310 |
| 0.197 | 0.392 | -4.930 | 0.352  | 4.691 | 4.339 |
| 0.282 | 0.480 | -5.168 | -0.308 | 2.255 | 2.563 |
| 0.039 | 0.193 | -3.720 | -0.727 | 7.967 | 8.693 |
| 0.058 | 0.219 | -4.024 | 0.410  | 9.052 | 8.642 |
| 0.036 | 0.189 | -3.662 | 0.564  | 7.130 | 6.566 |
| 0.133 | 0.316 | -4.651 | 0.547  | 5.535 | 4.988 |
| 0.066 | 0.230 | -4.124 | 0.619  | 7.715 | 7.096 |
| 0.924 | 0.959 | -5.710 | 0.028  | 4.459 | 4.431 |
| 0.345 | 0.540 | -5.293 | -0.286 | 3.395 | 3.681 |
| 0.281 | 0.478 | -5.165 | -0.569 | 4.448 | 5.017 |
| 0.086 | 0.259 | -4.331 | 0.368  | 7.175 | 6.807 |
| 0.024 | 0.173 | -3.314 | 0.748  | 6.033 | 5.285 |
| 0.016 | 0.162 | -3.024 | 0.685  | 5.104 | 4.419 |
| 0.008 | 0.157 | -2.413 | 1.695  | 6.615 | 4.920 |
| 0.794 | 0.884 | -5.682 | -0.066 | 2.159 | 2.225 |
| 0.494 | 0.667 | -5.493 | -0.187 | 3.806 | 3.993 |
| 0.430 | 0.616 | -5.421 | 0.183  | 6.071 | 5.888 |
| 0.056 | 0.217 | -3.996 | 0.427  | 8.957 | 8.530 |
| 0.354 | 0.548 | -5.308 | 0.241  | 3.857 | 3.617 |
| 0.040 | 0.194 | -3.740 | 0.767  | 7.534 | 6.766 |
| 0.076 | 0.245 | -4.235 | 0.458  | 6.050 | 5.591 |
| 0.006 | 0.157 | -2.173 | 1.073  | 5.581 | 4.508 |
| 0.267 | 0.465 | -5.132 | 0.674  | 4.755 | 4.080 |
| 0.015 | 0.160 | -2.942 | -0.693 | 7.825 | 8.518 |
| 0.432 | 0.617 | -5.423 | 0.206  | 3.782 | 3.576 |
| 0.499 | 0.670 | -5.499 | 0.199  | 5.481 | 5.282 |



|       |       |        |        |       |       |
|-------|-------|--------|--------|-------|-------|
| 0.005 | 0.157 | -2.070 | -0.899 | 7.214 | 8.113 |
| 0.423 | 0.609 | -5.412 | 0.240  | 4.740 | 4.499 |
| 0.063 | 0.226 | -4.091 | -0.584 | 4.949 | 5.533 |
| 0.320 | 0.518 | -5.248 | -0.307 | 3.236 | 3.543 |
| 0.510 | 0.679 | -5.509 | 0.280  | 5.518 | 5.238 |
| 0.435 | 0.619 | -5.427 | 0.304  | 3.643 | 3.339 |
| 0.460 | 0.641 | -5.457 | -0.333 | 3.695 | 4.028 |
| 0.038 | 0.192 | -3.693 | 0.541  | 5.266 | 4.725 |
| 0.193 | 0.386 | -4.915 | 0.374  | 5.925 | 5.551 |
| 0.629 | 0.771 | -5.605 | -0.096 | 2.018 | 2.114 |
| 0.288 | 0.487 | -5.182 | 0.332  | 4.389 | 4.057 |
| 0.896 | 0.943 | -5.707 | 0.042  | 3.581 | 3.539 |
| 0.007 | 0.157 | -2.360 | 1.275  | 9.405 | 8.130 |
| 0.118 | 0.298 | -4.561 | 0.516  | 3.080 | 2.563 |
| 0.068 | 0.233 | -4.145 | -0.606 | 3.833 | 4.438 |
| 0.153 | 0.340 | -4.749 | -0.286 | 4.679 | 4.966 |
| 0.867 | 0.928 | -5.702 | -0.055 | 6.470 | 6.525 |
| 0.109 | 0.288 | -4.506 | -0.445 | 3.720 | 4.165 |
| 0.094 | 0.270 | -4.392 | -0.507 | 5.562 | 6.069 |
| 0.628 | 0.769 | -5.603 | 0.097  | 5.752 | 5.655 |
| 0.423 | 0.609 | -5.411 | -0.292 | 4.065 | 4.357 |
| 0.004 | 0.157 | -1.959 | 1.663  | 6.494 | 4.832 |
| 0.027 | 0.176 | -3.416 | -0.676 | 6.441 | 7.116 |
| 0.829 | 0.904 | -5.693 | -0.073 | 5.020 | 5.093 |
| 0.499 | 0.670 | -5.498 | 0.225  | 6.019 | 5.794 |
| 0.005 | 0.157 | -2.113 | -1.081 | 5.209 | 6.290 |
| 0.642 | 0.780 | -5.612 | -0.138 | 5.101 | 5.239 |
| 0.209 | 0.404 | -4.971 | 0.279  | 6.760 | 6.482 |
| 0.129 | 0.310 | -4.628 | -0.624 | 2.885 | 3.509 |
| 0.331 | 0.527 | -5.268 | -0.260 | 5.377 | 5.637 |
| 0.380 | 0.569 | -5.350 | -0.165 | 5.707 | 5.872 |
| 0.340 | 0.535 | -5.285 | -0.398 | 3.621 | 4.019 |
| 0.055 | 0.216 | -3.987 | 0.471  | 7.410 | 6.939 |
| 0.704 | 0.824 | -5.646 | 0.125  | 3.129 | 3.004 |
| 0.264 | 0.462 | -5.125 | 0.306  | 7.189 | 6.883 |
| 0.818 | 0.897 | -5.690 | -0.062 | 3.184 | 3.246 |
| 0.502 | 0.672 | -5.501 | 0.199  | 3.656 | 3.457 |
| 0.048 | 0.205 | -3.883 | -0.615 | 4.940 | 5.555 |
| 0.049 | 0.207 | -3.893 | -0.489 | 3.720 | 4.209 |
| 0.084 | 0.256 | -4.310 | -0.601 | 5.810 | 6.411 |
| 0.630 | 0.771 | -5.605 | 0.123  | 2.690 | 2.568 |
| 0.025 | 0.175 | -3.358 | -0.713 | 3.975 | 4.688 |
| 0.004 | 0.157 | -1.835 | 0.851  | 4.518 | 3.667 |
| 0.033 | 0.184 | -3.584 | -1.178 | 5.840 | 7.018 |
| 0.698 | 0.820 | -5.644 | -0.110 | 4.463 | 4.573 |
| 0.046 | 0.203 | -3.847 | 0.488  | 8.506 | 8.018 |
| 0.202 | 0.397 | -4.946 | 0.267  | 6.382 | 6.115 |
| 0.938 | 0.967 | -5.712 | -0.017 | 5.506 | 5.523 |
| 0.442 | 0.625 | -5.435 | -0.307 | 3.798 | 4.105 |
| 0.670 | 0.802 | -5.629 | -0.124 | 3.128 | 3.253 |

|       |       |        |        |       |       |
|-------|-------|--------|--------|-------|-------|
| 0.037 | 0.190 | -3.669 | -0.809 | 5.078 | 5.887 |
| 0.007 | 0.157 | -2.352 | -0.738 | 2.721 | 3.459 |
| 0.006 | 0.157 | -2.139 | 1.574  | 6.313 | 4.739 |
| 0.072 | 0.240 | -4.197 | -0.711 | 3.437 | 4.147 |
| 0.431 | 0.616 | -5.421 | 0.229  | 3.236 | 3.007 |
| 0.076 | 0.245 | -4.233 | -0.767 | 7.496 | 8.262 |
| 0.108 | 0.287 | -4.496 | 0.690  | 3.117 | 2.427 |
| 0.038 | 0.192 | -3.703 | -0.615 | 6.254 | 6.869 |
| 0.998 | 0.999 | -5.715 | 0.001  | 6.646 | 6.645 |
| 0.003 | 0.157 | -1.754 | -0.960 | 4.362 | 5.321 |
| 0.326 | 0.522 | -5.258 | -0.293 | 4.724 | 5.017 |
| 0.111 | 0.290 | -4.520 | 0.471  | 3.955 | 3.484 |
| 0.324 | 0.520 | -5.254 | 0.385  | 5.286 | 4.900 |
| 0.267 | 0.466 | -5.134 | 0.276  | 6.695 | 6.420 |
| 0.532 | 0.696 | -5.530 | -0.177 | 7.580 | 7.757 |
| 0.980 | 0.989 | -5.714 | -0.010 | 3.154 | 3.164 |
| 0.188 | 0.380 | -4.896 | 0.321  | 6.033 | 5.712 |
| 0.026 | 0.176 | -3.393 | -0.585 | 8.371 | 8.956 |
| 0.266 | 0.464 | -5.129 | -0.302 | 5.210 | 5.512 |
| 0.212 | 0.407 | -4.978 | 0.339  | 6.166 | 5.827 |
| 0.035 | 0.187 | -3.636 | 0.770  | 7.048 | 6.278 |
| 0.357 | 0.551 | -5.314 | -0.214 | 4.149 | 4.363 |
| 0.112 | 0.291 | -4.528 | 0.614  | 5.998 | 5.384 |
| 0.027 | 0.176 | -3.426 | -0.632 | 5.504 | 6.136 |
| 0.143 | 0.327 | -4.702 | -0.288 | 5.820 | 6.109 |
| 0.004 | 0.157 | -1.959 | -1.082 | 4.153 | 5.235 |
| 0.111 | 0.290 | -4.519 | -0.387 | 5.000 | 5.387 |
| 0.867 | 0.928 | -5.702 | -0.047 | 9.702 | 9.749 |
| 0.026 | 0.176 | -3.398 | -0.714 | 5.901 | 6.614 |
| 0.407 | 0.594 | -5.389 | 0.235  | 6.141 | 5.906 |
| 0.800 | 0.888 | -5.684 | 0.067  | 5.723 | 5.656 |
| 0.606 | 0.753 | -5.589 | -0.128 | 4.165 | 4.293 |
| 0.246 | 0.443 | -5.078 | -0.392 | 2.978 | 3.370 |
| 0.047 | 0.203 | -3.856 | 0.658  | 4.509 | 3.851 |
| 0.550 | 0.711 | -5.546 | 0.149  | 4.869 | 4.720 |
| 0.892 | 0.941 | -5.706 | 0.040  | 2.879 | 2.839 |
| 0.069 | 0.235 | -4.159 | 0.383  | 8.563 | 8.180 |
| 0.067 | 0.232 | -4.136 | 0.677  | 7.720 | 7.043 |
| 0.141 | 0.325 | -4.692 | 0.638  | 5.509 | 4.871 |
| 0.450 | 0.631 | -5.445 | 0.207  | 3.823 | 3.616 |
| 0.009 | 0.157 | -2.564 | 0.761  | 4.799 | 4.038 |
| 0.013 | 0.160 | -2.860 | 0.713  | 4.782 | 4.069 |
| 0.026 | 0.176 | -3.399 | 0.622  | 4.513 | 3.891 |
| 0.044 | 0.200 | -3.804 | 0.674  | 4.411 | 3.737 |
| 0.054 | 0.215 | -3.976 | 0.669  | 7.122 | 6.453 |
| 0.187 | 0.379 | -4.894 | 0.512  | 5.681 | 5.169 |
| 0.680 | 0.808 | -5.634 | 0.145  | 3.190 | 3.045 |
| 0.986 | 0.993 | -5.715 | -0.005 | 4.563 | 4.568 |
| 0.368 | 0.559 | -5.331 | -0.237 | 4.553 | 4.790 |
| 0.571 | 0.726 | -5.563 | 0.186  | 3.847 | 3.661 |

|       |       |        |        |       |       |
|-------|-------|--------|--------|-------|-------|
| 0.207 | 0.402 | -4.964 | -0.328 | 2.469 | 2.797 |
| 0.206 | 0.401 | -4.961 | 0.318  | 7.096 | 6.779 |
| 0.719 | 0.834 | -5.653 | -0.087 | 2.928 | 3.015 |
| 0.665 | 0.797 | -5.626 | -0.093 | 3.252 | 3.344 |
| 0.453 | 0.633 | -5.448 | 0.158  | 7.081 | 6.923 |
| 0.153 | 0.340 | -4.749 | -0.376 | 5.193 | 5.569 |
| 0.046 | 0.203 | -3.839 | -0.433 | 4.529 | 4.963 |
| 0.027 | 0.177 | -3.438 | 0.567  | 7.385 | 6.819 |
| 0.900 | 0.945 | -5.707 | 0.028  | 5.893 | 5.866 |
| 0.527 | 0.692 | -5.525 | 0.140  | 5.534 | 5.394 |
| 0.337 | 0.533 | -5.279 | 0.282  | 2.220 | 1.938 |
| 0.317 | 0.515 | -5.241 | 0.295  | 2.960 | 2.665 |
| 0.058 | 0.219 | -4.023 | 0.503  | 2.758 | 2.255 |
| 0.702 | 0.822 | -5.645 | -0.142 | 1.507 | 1.650 |
| 0.152 | 0.339 | -4.749 | -0.324 | 5.996 | 6.320 |
| 0.132 | 0.314 | -4.643 | 0.370  | 7.375 | 7.005 |
| 0.924 | 0.959 | -5.710 | -0.027 | 3.687 | 3.714 |
| 0.448 | 0.630 | -5.442 | -0.228 | 2.452 | 2.681 |
| 0.349 | 0.544 | -5.300 | 0.229  | 5.203 | 4.975 |
| 0.157 | 0.345 | -4.770 | 0.333  | 6.152 | 5.819 |
| 0.287 | 0.485 | -5.179 | 0.475  | 3.070 | 2.595 |
| 0.318 | 0.516 | -5.244 | 0.313  | 3.189 | 2.876 |
| 0.327 | 0.523 | -5.260 | 0.276  | 3.316 | 3.040 |
| 0.039 | 0.192 | -3.712 | -0.489 | 5.982 | 6.471 |
| 0.197 | 0.392 | -4.930 | -0.618 | 2.343 | 2.960 |
| 0.381 | 0.570 | -5.352 | 0.251  | 3.879 | 3.628 |
| 0.613 | 0.758 | -5.593 | -0.146 | 2.448 | 2.594 |
| 0.206 | 0.401 | -4.960 | 0.304  | 6.342 | 6.038 |
| 0.050 | 0.207 | -3.903 | 0.624  | 4.453 | 3.828 |
| 0.032 | 0.182 | -3.549 | 0.794  | 2.590 | 1.796 |
| 0.802 | 0.889 | -5.685 | -0.116 | 3.001 | 3.118 |
| 0.911 | 0.952 | -5.709 | 0.031  | 3.183 | 3.152 |
| 0.004 | 0.157 | -1.898 | -1.150 | 2.229 | 3.378 |
| 0.001 | 0.157 | -1.009 | -1.341 | 5.474 | 6.815 |
| 0.001 | 0.157 | -0.657 | -1.154 | 5.122 | 6.276 |
| 0.120 | 0.301 | -4.578 | 0.309  | 3.966 | 3.657 |
| 0.041 | 0.196 | -3.764 | 0.517  | 4.157 | 3.640 |
| 0.208 | 0.403 | -4.965 | 0.303  | 3.417 | 3.113 |
| 0.085 | 0.258 | -4.323 | 0.413  | 5.047 | 4.634 |
| 0.987 | 0.993 | -5.715 | -0.011 | 1.859 | 1.870 |
| 0.011 | 0.157 | -2.688 | -0.848 | 6.176 | 7.024 |
| 0.928 | 0.961 | -5.711 | 0.049  | 4.179 | 4.130 |
| 0.030 | 0.180 | -3.521 | 0.656  | 8.107 | 7.452 |
| 0.019 | 0.164 | -3.147 | 0.818  | 4.964 | 4.146 |
| 0.042 | 0.198 | -3.779 | 0.904  | 5.571 | 4.667 |
| 0.020 | 0.166 | -3.166 | 0.569  | 7.466 | 6.897 |
| 0.009 | 0.157 | -2.550 | -0.741 | 4.199 | 4.941 |
| 0.175 | 0.365 | -4.847 | 0.460  | 2.585 | 2.125 |
| 0.528 | 0.693 | -5.526 | 0.158  | 3.348 | 3.190 |
| 0.929 | 0.961 | -5.711 | -0.034 | 2.339 | 2.372 |

|       |       |        |        |       |       |
|-------|-------|--------|--------|-------|-------|
| 0.432 | 0.617 | -5.423 | 0.234  | 3.303 | 3.068 |
| 0.311 | 0.508 | -5.229 | 0.287  | 6.888 | 6.600 |
| 0.015 | 0.160 | -2.952 | 0.580  | 4.457 | 3.877 |
| 0.564 | 0.721 | -5.557 | -0.157 | 3.553 | 3.710 |
| 0.104 | 0.281 | -4.468 | 0.404  | 7.524 | 7.120 |
| 0.047 | 0.204 | -3.862 | 0.459  | 5.864 | 5.406 |
| 0.077 | 0.246 | -4.241 | 0.422  | 7.376 | 6.954 |
| 0.091 | 0.267 | -4.374 | 0.399  | 7.228 | 6.829 |
| 0.092 | 0.267 | -4.379 | 0.335  | 6.566 | 6.231 |
| 0.143 | 0.327 | -4.703 | 0.358  | 7.790 | 7.432 |
| 0.146 | 0.330 | -4.718 | 0.300  | 6.519 | 6.219 |
| 0.159 | 0.347 | -4.778 | 0.621  | 5.788 | 5.168 |
| 0.161 | 0.350 | -4.789 | 0.377  | 4.271 | 3.895 |
| 0.190 | 0.382 | -4.903 | 0.293  | 7.014 | 6.721 |
| 0.193 | 0.386 | -4.914 | 0.278  | 7.124 | 6.845 |
| 0.205 | 0.399 | -4.955 | 0.292  | 8.968 | 8.675 |
| 0.265 | 0.462 | -5.126 | 0.296  | 8.572 | 8.276 |
| 0.311 | 0.508 | -5.229 | 0.247  | 8.144 | 7.897 |
| 0.349 | 0.544 | -5.299 | 0.225  | 8.146 | 7.921 |
| 0.534 | 0.697 | -5.532 | 0.149  | 6.390 | 6.240 |
| 0.001 | 0.157 | -0.802 | 1.415  | 4.961 | 3.546 |
| 0.068 | 0.234 | -4.151 | 0.705  | 5.450 | 4.746 |
| 0.948 | 0.973 | -5.713 | 0.014  | 6.791 | 6.778 |
| 0.002 | 0.157 | -1.075 | 0.994  | 3.705 | 2.711 |
| 0.361 | 0.553 | -5.321 | 0.228  | 7.599 | 7.372 |
| 0.030 | 0.179 | -3.510 | 0.489  | 5.821 | 5.331 |
| 0.055 | 0.216 | -3.983 | 0.451  | 7.074 | 6.623 |
| 0.011 | 0.157 | -2.699 | 0.557  | 7.251 | 6.695 |
| 0.166 | 0.355 | -4.809 | 0.351  | 5.911 | 5.559 |
| 0.203 | 0.398 | -4.950 | -0.357 | 3.144 | 3.501 |
| 0.072 | 0.240 | -4.191 | -0.894 | 4.647 | 5.540 |
| 0.122 | 0.303 | -4.589 | 0.691  | 4.707 | 4.015 |
| 0.815 | 0.896 | -5.689 | 0.074  | 4.102 | 4.029 |
| 0.435 | 0.619 | -5.427 | 0.221  | 7.824 | 7.603 |
| 0.277 | 0.475 | -5.157 | -0.298 | 3.953 | 4.251 |
| 0.296 | 0.493 | -5.199 | -0.261 | 4.041 | 4.302 |
| 0.345 | 0.540 | -5.294 | -0.250 | 3.990 | 4.241 |
| 0.434 | 0.618 | -5.425 | -0.186 | 5.107 | 5.293 |
| 0.684 | 0.811 | -5.636 | -0.111 | 4.093 | 4.204 |
| 0.163 | 0.352 | -4.796 | 0.432  | 5.811 | 5.379 |
| 0.648 | 0.784 | -5.616 | 0.137  | 5.615 | 5.478 |
| 0.419 | 0.606 | -5.406 | -0.220 | 3.142 | 3.362 |
| 0.448 | 0.630 | -5.442 | -0.217 | 3.398 | 3.615 |
| 0.674 | 0.804 | -5.631 | -0.123 | 2.449 | 2.572 |
| 0.357 | 0.551 | -5.313 | -0.248 | 6.662 | 6.909 |
| 0.073 | 0.241 | -4.205 | 0.352  | 7.236 | 6.884 |
| 0.013 | 0.160 | -2.805 | 0.693  | 7.853 | 7.159 |
| 0.208 | 0.402 | -4.965 | 0.510  | 7.387 | 6.877 |
| 0.041 | 0.195 | -3.748 | -1.120 | 3.659 | 4.779 |
| 0.290 | 0.488 | -5.185 | -0.296 | 5.054 | 5.350 |

|       |       |        |        |       |       |
|-------|-------|--------|--------|-------|-------|
| 0.057 | 0.218 | -4.013 | -0.459 | 3.015 | 3.474 |
| 0.033 | 0.184 | -3.594 | 0.479  | 6.899 | 6.420 |
| 0.067 | 0.232 | -4.136 | 0.378  | 7.267 | 6.890 |
| 0.009 | 0.157 | -2.514 | 1.095  | 9.795 | 8.700 |
| 0.018 | 0.162 | -3.086 | 0.665  | 7.516 | 6.851 |
| 0.018 | 0.162 | -3.085 | -0.512 | 2.866 | 3.378 |
| 0.014 | 0.160 | -2.879 | 0.836  | 9.157 | 8.321 |
| 0.186 | 0.378 | -4.888 | -0.413 | 2.153 | 2.566 |
| 0.030 | 0.179 | -3.504 | 0.822  | 6.196 | 5.374 |
| 0.763 | 0.864 | -5.672 | -0.090 | 2.548 | 2.637 |
| 0.161 | 0.350 | -4.788 | 0.375  | 6.170 | 5.795 |
| 0.492 | 0.666 | -5.491 | -0.196 | 5.952 | 6.148 |
| 0.154 | 0.341 | -4.754 | -0.396 | 4.236 | 4.632 |
| 0.008 | 0.157 | -2.468 | -1.014 | 2.350 | 3.363 |
| 0.003 | 0.157 | -1.590 | 0.902  | 4.812 | 3.910 |
| 0.436 | 0.619 | -5.427 | 0.306  | 3.523 | 3.217 |
| 0.246 | 0.443 | -5.079 | 0.321  | 4.707 | 4.386 |
| 0.988 | 0.994 | -5.715 | -0.005 | 3.136 | 3.140 |
| 0.364 | 0.556 | -5.326 | 0.187  | 5.788 | 5.602 |
| 0.768 | 0.867 | -5.674 | 0.082  | 4.198 | 4.116 |
| 0.287 | 0.485 | -5.179 | 0.212  | 6.385 | 6.173 |
| 0.447 | 0.629 | -5.441 | 0.169  | 5.783 | 5.614 |
| 0.222 | 0.419 | -5.011 | -0.337 | 4.146 | 4.483 |
| 0.173 | 0.362 | -4.838 | 0.342  | 2.806 | 2.463 |
| 0.008 | 0.157 | -2.470 | 0.804  | 5.270 | 4.466 |
| 0.563 | 0.721 | -5.556 | 0.252  | 5.139 | 4.886 |
| 0.015 | 0.160 | -2.955 | 0.615  | 6.760 | 6.145 |
| 0.062 | 0.225 | -4.081 | 0.459  | 9.748 | 9.289 |
| 0.021 | 0.168 | -3.231 | -0.677 | 6.606 | 7.283 |
| 0.233 | 0.430 | -5.043 | -0.396 | 1.594 | 1.990 |
| 0.802 | 0.889 | -5.685 | 0.169  | 1.365 | 1.196 |
| 0.031 | 0.182 | -3.544 | 0.842  | 6.725 | 5.883 |
| 0.015 | 0.160 | -2.933 | 0.770  | 7.669 | 6.899 |
| 0.185 | 0.377 | -4.886 | -0.410 | 2.451 | 2.861 |
| 0.001 | 0.157 | -0.498 | -1.750 | 3.099 | 4.849 |
| 0.071 | 0.238 | -4.179 | 0.650  | 6.869 | 6.219 |
| 0.298 | 0.495 | -5.203 | 0.193  | 8.132 | 7.939 |
| 0.095 | 0.271 | -4.404 | 0.515  | 3.490 | 2.975 |
| 0.030 | 0.178 | -3.497 | 0.943  | 6.717 | 5.774 |
| 0.205 | 0.400 | -4.955 | 0.372  | 3.496 | 3.124 |
| 0.005 | 0.157 | -1.996 | 1.173  | 7.695 | 6.522 |
| 0.004 | 0.157 | -1.845 | 1.125  | 6.656 | 5.532 |
| 0.429 | 0.614 | -5.418 | -0.203 | 3.071 | 3.274 |
| 0.018 | 0.164 | -3.117 | 0.834  | 5.659 | 4.825 |
| 0.004 | 0.157 | -1.838 | 2.406  | 7.087 | 4.681 |
| 0.101 | 0.278 | -4.446 | 0.400  | 6.688 | 6.288 |
| 0.761 | 0.863 | -5.671 | -0.092 | 4.713 | 4.805 |
| 0.140 | 0.324 | -4.690 | -0.495 | 2.946 | 3.440 |
| 0.140 | 0.324 | -4.685 | -0.307 | 7.683 | 7.990 |
| 0.233 | 0.430 | -5.044 | -0.232 | 4.182 | 4.414 |

|       |       |        |        |       |       |
|-------|-------|--------|--------|-------|-------|
| 0.211 | 0.406 | -4.977 | -0.356 | 4.253 | 4.609 |
| 0.084 | 0.256 | -4.312 | 0.543  | 4.440 | 3.897 |
| 0.034 | 0.185 | -3.609 | -1.018 | 3.252 | 4.270 |
| 0.263 | 0.461 | -5.122 | -0.579 | 2.689 | 3.268 |
| 0.905 | 0.949 | -5.708 | -0.052 | 3.297 | 3.349 |
| 0.682 | 0.809 | -5.635 | 0.144  | 1.790 | 1.646 |
| 0.104 | 0.281 | -4.471 | -0.435 | 3.742 | 4.177 |
| 0.007 | 0.157 | -2.356 | 1.263  | 6.221 | 4.958 |
| 0.958 | 0.978 | -5.713 | 0.015  | 3.994 | 3.979 |
| 0.830 | 0.904 | -5.693 | 0.063  | 4.495 | 4.432 |
| 0.372 | 0.562 | -5.338 | 0.411  | 2.761 | 2.350 |
| 0.015 | 0.161 | -2.972 | 1.028  | 4.174 | 3.146 |
| 0.294 | 0.491 | -5.195 | 0.247  | 2.630 | 2.383 |
| 0.069 | 0.235 | -4.157 | 0.533  | 5.147 | 4.614 |
| 0.127 | 0.307 | -4.615 | 0.341  | 7.183 | 6.842 |
| 0.339 | 0.534 | -5.283 | -0.492 | 1.433 | 1.925 |
| 0.970 | 0.985 | -5.714 | 0.015  | 3.849 | 3.834 |
| 0.013 | 0.160 | -2.823 | 0.841  | 7.871 | 7.030 |
| 0.468 | 0.647 | -5.465 | -0.197 | 2.979 | 3.176 |
| 0.643 | 0.780 | -5.613 | -0.115 | 3.295 | 3.410 |
| 0.172 | 0.362 | -4.834 | -0.549 | 4.931 | 5.480 |
| 0.441 | 0.625 | -5.434 | 0.234  | 5.105 | 4.872 |
| 0.028 | 0.178 | -3.452 | -0.618 | 3.984 | 4.602 |
| 0.003 | 0.157 | -1.523 | -1.166 | 2.471 | 3.638 |
| 0.059 | 0.221 | -4.039 | -0.577 | 5.879 | 6.456 |
| 0.024 | 0.173 | -3.327 | 1.054  | 4.576 | 3.522 |
| 0.193 | 0.386 | -4.915 | -0.525 | 2.752 | 3.276 |
| 0.295 | 0.492 | -5.197 | 0.285  | 4.374 | 4.088 |
| 0.699 | 0.820 | -5.644 | 0.096  | 4.222 | 4.126 |
| 0.761 | 0.863 | -5.671 | 0.076  | 4.323 | 4.247 |
| 0.029 | 0.178 | -3.486 | 0.895  | 5.455 | 4.560 |
| 0.075 | 0.243 | -4.219 | 0.595  | 5.425 | 4.830 |
| 0.025 | 0.175 | -3.366 | -0.641 | 3.403 | 4.044 |
| 0.957 | 0.978 | -5.713 | -0.015 | 4.570 | 4.585 |
| 0.008 | 0.157 | -2.442 | 0.821  | 3.754 | 2.933 |
| 0.079 | 0.249 | -4.262 | 0.448  | 3.250 | 2.802 |
| 0.051 | 0.209 | -3.925 | -0.571 | 1.580 | 2.150 |
| 0.090 | 0.264 | -4.360 | 0.425  | 3.137 | 2.712 |
| 0.083 | 0.255 | -4.305 | -0.457 | 6.147 | 6.604 |
| 0.030 | 0.180 | -3.516 | -0.991 | 3.364 | 4.355 |
| 0.845 | 0.914 | -5.697 | -0.103 | 2.707 | 2.810 |
| 0.023 | 0.173 | -3.310 | 1.007  | 6.427 | 5.421 |
| 0.752 | 0.856 | -5.667 | -0.112 | 6.900 | 7.012 |
| 0.172 | 0.362 | -4.836 | -0.402 | 2.256 | 2.658 |
| 0.020 | 0.167 | -3.194 | -0.709 | 4.645 | 5.355 |
| 0.239 | 0.436 | -5.059 | -0.248 | 4.495 | 4.743 |
| 0.236 | 0.433 | -5.053 | 0.308  | 5.250 | 4.942 |
| 0.244 | 0.442 | -5.074 | 0.309  | 5.232 | 4.923 |
| 0.733 | 0.844 | -5.660 | -0.076 | 3.212 | 3.288 |
| 0.098 | 0.275 | -4.428 | -0.318 | 2.145 | 2.464 |

|       |       |        |        |       |       |
|-------|-------|--------|--------|-------|-------|
| 0.239 | 0.437 | -5.060 | -0.238 | 2.512 | 2.750 |
| 0.502 | 0.672 | -5.501 | -0.147 | 2.959 | 3.106 |
| 0.317 | 0.515 | -5.242 | -0.202 | 3.194 | 3.396 |
| 0.583 | 0.736 | -5.572 | -0.116 | 3.004 | 3.120 |
| 0.031 | 0.182 | -3.544 | 0.494  | 7.960 | 7.466 |
| 0.978 | 0.989 | -5.714 | -0.008 | 3.519 | 3.527 |
| 0.650 | 0.786 | -5.617 | 0.096  | 5.647 | 5.551 |
| 0.583 | 0.737 | -5.572 | -0.206 | 4.926 | 5.132 |
| 0.374 | 0.565 | -5.341 | 0.216  | 6.149 | 5.933 |
| 0.135 | 0.319 | -4.663 | -0.431 | 4.419 | 4.850 |
| 0.691 | 0.815 | -5.640 | 0.118  | 3.398 | 3.280 |
| 0.052 | 0.210 | -3.935 | -0.730 | 2.920 | 3.650 |
| 0.110 | 0.289 | -4.513 | -0.361 | 6.711 | 7.072 |
| 0.092 | 0.267 | -4.378 | -0.457 | 4.756 | 5.213 |
| 0.639 | 0.778 | -5.611 | -0.137 | 3.342 | 3.479 |
| 0.096 | 0.272 | -4.410 | 0.474  | 5.755 | 5.280 |
| 0.359 | 0.552 | -5.317 | -0.241 | 3.413 | 3.654 |
| 0.044 | 0.200 | -3.808 | 0.769  | 4.747 | 3.978 |
| 0.566 | 0.722 | -5.559 | -0.154 | 2.679 | 2.833 |
| 0.091 | 0.266 | -4.370 | 0.433  | 7.403 | 6.971 |
| 0.366 | 0.558 | -5.329 | -0.460 | 2.162 | 2.622 |
| 0.081 | 0.252 | -4.281 | -0.399 | 7.797 | 8.196 |
| 0.056 | 0.218 | -4.002 | -0.672 | 1.769 | 2.442 |
| 0.343 | 0.538 | -5.290 | -0.276 | 2.699 | 2.975 |
| 0.355 | 0.550 | -5.311 | 0.211  | 4.183 | 3.972 |
| 0.148 | 0.332 | -4.727 | 0.406  | 5.929 | 5.523 |
| 0.228 | 0.425 | -5.029 | 0.319  | 3.360 | 3.041 |
| 0.120 | 0.301 | -4.578 | 0.442  | 7.048 | 6.606 |
| 0.022 | 0.171 | -3.273 | -0.879 | 2.751 | 3.630 |
| 0.023 | 0.172 | -3.286 | 0.898  | 4.501 | 3.603 |
| 0.268 | 0.467 | -5.136 | -0.245 | 3.420 | 3.666 |
| 0.003 | 0.157 | -1.667 | 1.269  | 3.990 | 2.721 |
| 0.005 | 0.157 | -2.025 | 1.484  | 7.485 | 6.002 |
| 0.248 | 0.446 | -5.085 | -0.385 | 5.078 | 5.464 |
| 0.072 | 0.240 | -4.191 | 0.612  | 6.008 | 5.396 |
| 0.006 | 0.157 | -2.202 | 0.725  | 5.520 | 4.795 |
| 0.081 | 0.252 | -4.282 | 0.425  | 8.679 | 8.254 |
| 0.034 | 0.184 | -3.600 | 0.646  | 6.056 | 5.410 |
| 0.327 | 0.523 | -5.261 | -0.261 | 2.943 | 3.205 |
| 0.353 | 0.548 | -5.307 | 0.235  | 4.868 | 4.633 |
| 0.383 | 0.572 | -5.354 | 0.335  | 3.363 | 3.027 |
| 0.039 | 0.192 | -3.712 | 1.032  | 4.954 | 3.922 |
| 0.016 | 0.162 | -2.990 | 0.627  | 6.893 | 6.266 |
| 0.038 | 0.192 | -3.695 | 1.268  | 7.142 | 5.874 |
| 0.127 | 0.308 | -4.616 | -0.468 | 4.033 | 4.501 |
| 0.185 | 0.377 | -4.885 | -0.539 | 4.539 | 5.078 |
| 0.104 | 0.281 | -4.469 | -0.405 | 2.731 | 3.136 |
| 0.323 | 0.520 | -5.254 | -0.242 | 7.804 | 8.046 |
| 0.060 | 0.221 | -4.048 | -0.606 | 4.226 | 4.832 |
| 0.003 | 0.157 | -1.752 | 0.846  | 3.253 | 2.407 |

|       |       |        |        |       |       |
|-------|-------|--------|--------|-------|-------|
| 0.062 | 0.225 | -4.078 | -0.755 | 2.540 | 3.295 |
| 0.549 | 0.710 | -5.545 | -0.127 | 6.634 | 6.761 |
| 0.374 | 0.565 | -5.342 | 0.188  | 7.488 | 7.299 |
| 0.127 | 0.307 | -4.615 | 0.371  | 7.742 | 7.371 |
| 0.037 | 0.190 | -3.678 | 1.018  | 6.798 | 5.781 |
| 0.009 | 0.157 | -2.556 | 1.335  | 7.409 | 6.074 |
| 0.078 | 0.247 | -4.252 | 0.668  | 5.757 | 5.089 |
| 0.027 | 0.176 | -3.427 | 1.054  | 4.958 | 3.904 |
| 0.014 | 0.160 | -2.917 | 1.469  | 7.797 | 6.328 |
| 0.079 | 0.249 | -4.264 | -0.511 | 4.502 | 5.013 |
| 0.859 | 0.925 | -5.700 | -0.043 | 6.848 | 6.891 |
| 0.406 | 0.593 | -5.388 | -0.241 | 2.983 | 3.224 |
| 0.116 | 0.296 | -4.551 | 0.349  | 6.535 | 6.186 |
| 0.077 | 0.246 | -4.242 | 0.414  | 5.619 | 5.205 |
| 0.406 | 0.593 | -5.388 | -0.211 | 4.234 | 4.445 |
| 0.060 | 0.221 | -4.047 | 0.386  | 4.831 | 4.445 |
| 0.593 | 0.745 | -5.580 | 0.141  | 5.782 | 5.641 |
| 0.232 | 0.428 | -5.039 | 0.532  | 3.945 | 3.412 |
| 0.464 | 0.644 | -5.461 | 0.176  | 5.976 | 5.800 |
| 0.072 | 0.240 | -4.197 | 0.406  | 3.873 | 3.468 |
| 0.116 | 0.296 | -4.552 | 0.745  | 6.517 | 5.772 |
| 0.015 | 0.160 | -2.946 | 0.713  | 2.851 | 2.137 |
| 0.098 | 0.275 | -4.429 | 0.505  | 9.436 | 8.931 |
| 0.246 | 0.444 | -5.080 | 0.375  | 8.720 | 8.344 |
| 0.171 | 0.361 | -4.830 | -0.385 | 4.540 | 4.925 |
| 0.471 | 0.650 | -5.469 | 0.163  | 5.630 | 5.467 |
| 0.454 | 0.634 | -5.449 | -0.211 | 3.248 | 3.459 |
| 0.009 | 0.157 | -2.574 | -0.916 | 7.479 | 8.395 |
| 0.059 | 0.221 | -4.043 | -0.402 | 3.560 | 3.962 |
| 0.322 | 0.519 | -5.252 | -0.466 | 2.478 | 2.944 |
| 0.053 | 0.212 | -3.952 | -0.478 | 3.031 | 3.509 |
| 0.038 | 0.192 | -3.702 | -0.493 | 3.821 | 4.314 |
| 0.735 | 0.845 | -5.660 | -0.127 | 4.356 | 4.483 |
| 0.443 | 0.626 | -5.436 | -0.359 | 4.571 | 4.930 |
| 0.010 | 0.157 | -2.607 | -0.754 | 3.038 | 3.792 |
| 0.874 | 0.932 | -5.703 | 0.050  | 2.400 | 2.350 |
| 0.097 | 0.274 | -4.419 | -0.455 | 7.993 | 8.448 |
| 0.008 | 0.157 | -2.435 | -0.819 | 8.155 | 8.975 |
| 0.236 | 0.433 | -5.051 | 0.305  | 4.415 | 4.110 |
| 0.380 | 0.569 | -5.350 | 0.264  | 5.240 | 4.976 |
| 0.947 | 0.972 | -5.713 | 0.020  | 4.089 | 4.069 |
| 0.738 | 0.848 | -5.662 | -0.086 | 5.733 | 5.819 |
| 0.938 | 0.967 | -5.712 | -0.018 | 5.120 | 5.138 |
| 0.018 | 0.163 | -3.091 | -0.648 | 4.644 | 5.292 |
| 0.015 | 0.160 | -2.930 | 0.952  | 8.977 | 8.025 |
| 0.073 | 0.241 | -4.202 | -0.693 | 3.209 | 3.902 |
| 0.419 | 0.606 | -5.406 | 0.204  | 2.647 | 2.443 |
| 0.053 | 0.214 | -3.963 | 0.435  | 7.952 | 7.517 |
| 0.475 | 0.653 | -5.473 | 0.142  | 8.126 | 7.984 |
| 0.095 | 0.271 | -4.406 | 0.453  | 4.549 | 4.096 |



|       |       |        |        |       |       |
|-------|-------|--------|--------|-------|-------|
| 0.715 | 0.831 | -5.652 | -0.092 | 3.434 | 3.526 |
| 0.043 | 0.200 | -3.801 | 0.861  | 5.811 | 4.950 |
| 0.490 | 0.664 | -5.489 | 0.191  | 4.043 | 3.852 |
| 0.062 | 0.225 | -4.078 | 0.372  | 5.272 | 4.901 |
| 0.007 | 0.157 | -2.278 | 1.143  | 6.172 | 5.028 |
| 0.451 | 0.632 | -5.446 | 0.212  | 4.159 | 3.947 |
| 0.021 | 0.169 | -3.241 | 1.440  | 7.555 | 6.115 |
| 0.812 | 0.894 | -5.688 | -0.051 | 5.551 | 5.602 |
| 0.358 | 0.551 | -5.315 | -0.258 | 3.068 | 3.326 |
| 0.448 | 0.630 | -5.442 | -0.167 | 3.467 | 3.634 |
| 0.058 | 0.219 | -4.021 | 0.488  | 3.039 | 2.552 |
| 0.496 | 0.668 | -5.496 | 0.233  | 4.854 | 4.621 |
| 0.269 | 0.467 | -5.137 | 0.279  | 6.525 | 6.246 |
| 0.055 | 0.216 | -3.982 | 0.851  | 6.926 | 6.074 |
| 0.382 | 0.571 | -5.354 | 0.498  | 5.599 | 5.101 |
| 0.143 | 0.327 | -4.705 | 0.786  | 6.121 | 5.334 |
| 0.821 | 0.899 | -5.691 | 0.066  | 5.426 | 5.360 |
| 0.043 | 0.198 | -3.787 | 0.370  | 7.961 | 7.592 |
| 0.970 | 0.985 | -5.714 | -0.009 | 3.702 | 3.710 |
| 0.612 | 0.757 | -5.593 | 0.122  | 3.323 | 3.202 |
| 0.057 | 0.218 | -4.007 | 0.452  | 5.445 | 4.992 |
| 0.794 | 0.884 | -5.683 | -0.127 | 1.207 | 1.334 |
| 0.306 | 0.503 | -5.219 | 0.199  | 7.077 | 6.878 |
| 0.171 | 0.361 | -4.830 | 0.268  | 9.467 | 9.199 |
| 0.043 | 0.200 | -3.801 | 0.826  | 9.434 | 8.608 |
| 0.845 | 0.915 | -5.697 | -0.090 | 5.313 | 5.403 |
| 0.399 | 0.587 | -5.378 | 0.305  | 5.350 | 5.045 |
| 0.433 | 0.617 | -5.424 | 0.233  | 4.551 | 4.318 |
| 0.123 | 0.304 | -4.592 | 0.392  | 4.676 | 4.284 |
| 0.469 | 0.648 | -5.467 | 0.171  | 7.841 | 7.670 |
| 0.060 | 0.222 | -4.054 | -0.569 | 3.877 | 4.446 |
| 0.111 | 0.290 | -4.521 | 0.367  | 5.559 | 5.192 |
| 0.691 | 0.815 | -5.640 | 0.113  | 6.054 | 5.941 |
| 0.119 | 0.299 | -4.572 | 0.355  | 4.923 | 4.568 |
| 0.271 | 0.470 | -5.143 | 0.234  | 4.793 | 4.559 |
| 0.558 | 0.717 | -5.553 | -0.148 | 2.761 | 2.909 |
| 0.042 | 0.198 | -3.780 | -0.512 | 3.415 | 3.927 |
| 0.077 | 0.246 | -4.245 | 0.449  | 3.987 | 3.538 |
| 0.015 | 0.160 | -2.952 | 0.605  | 7.213 | 6.608 |
| 0.191 | 0.384 | -4.908 | -0.370 | 7.030 | 7.400 |
| 0.027 | 0.176 | -3.423 | 0.910  | 6.130 | 5.220 |
| 0.767 | 0.866 | -5.673 | -0.066 | 4.833 | 4.898 |
| 0.361 | 0.553 | -5.320 | -0.349 | 4.497 | 4.847 |
| 0.106 | 0.284 | -4.484 | -0.367 | 3.896 | 4.263 |
| 0.897 | 0.943 | -5.707 | 0.053  | 4.342 | 4.289 |
| 0.103 | 0.280 | -4.462 | 0.627  | 8.507 | 7.880 |
| 0.260 | 0.457 | -5.115 | 0.270  | 6.957 | 6.687 |
| 0.443 | 0.626 | -5.436 | 0.223  | 3.973 | 3.750 |
| 0.009 | 0.157 | -2.577 | 1.111  | 6.942 | 5.831 |
| 0.036 | 0.189 | -3.654 | 1.074  | 6.628 | 5.554 |

|       |       |        |        |       |       |
|-------|-------|--------|--------|-------|-------|
| 0.157 | 0.345 | -4.769 | 0.326  | 8.142 | 7.816 |
| 0.196 | 0.390 | -4.927 | 0.357  | 4.711 | 4.354 |
| 0.044 | 0.200 | -3.808 | 0.493  | 7.842 | 7.349 |
| 0.012 | 0.160 | -2.785 | 1.143  | 8.878 | 7.735 |
| 0.113 | 0.292 | -4.531 | 0.505  | 3.296 | 2.791 |
| 0.044 | 0.201 | -3.812 | 0.902  | 5.012 | 4.110 |
| 0.109 | 0.288 | -4.504 | 0.400  | 6.912 | 6.512 |
| 0.026 | 0.175 | -3.380 | 0.608  | 4.343 | 3.735 |
| 0.113 | 0.292 | -4.531 | 0.610  | 5.481 | 4.872 |
| 0.850 | 0.918 | -5.698 | -0.051 | 2.743 | 2.794 |
| 0.097 | 0.274 | -4.420 | -0.327 | 4.300 | 4.627 |
| 0.195 | 0.389 | -4.923 | -0.424 | 4.226 | 4.650 |
| 0.052 | 0.211 | -3.940 | 0.384  | 7.560 | 7.177 |
| 0.158 | 0.346 | -4.774 | 0.329  | 5.384 | 5.055 |
| 0.465 | 0.645 | -5.462 | -0.231 | 3.252 | 3.483 |
| 0.671 | 0.802 | -5.629 | -0.109 | 4.531 | 4.640 |
| 0.969 | 0.985 | -5.714 | 0.010  | 4.905 | 4.894 |
| 0.362 | 0.554 | -5.322 | -0.261 | 7.008 | 7.269 |
| 0.561 | 0.720 | -5.555 | -0.146 | 4.958 | 5.104 |
| 0.792 | 0.882 | -5.682 | -0.071 | 6.113 | 6.184 |
| 0.549 | 0.710 | -5.545 | 0.159  | 6.034 | 5.875 |
| 0.450 | 0.631 | -5.445 | -0.221 | 7.269 | 7.490 |
| 0.750 | 0.856 | -5.667 | -0.084 | 5.673 | 5.757 |
| 0.271 | 0.469 | -5.143 | -0.260 | 5.338 | 5.599 |
| 0.815 | 0.896 | -5.689 | -0.070 | 6.379 | 6.450 |
| 0.724 | 0.838 | -5.656 | -0.132 | 3.887 | 4.019 |
| 0.787 | 0.879 | -5.680 | -0.081 | 3.889 | 3.970 |
| 0.607 | 0.754 | -5.589 | -0.150 | 6.034 | 6.184 |
| 0.706 | 0.826 | -5.648 | 0.105  | 4.528 | 4.424 |
| 0.008 | 0.157 | -2.388 | 0.735  | 7.694 | 6.960 |
| 0.069 | 0.236 | -4.162 | -0.551 | 3.285 | 3.836 |
| 0.112 | 0.290 | -4.522 | 0.731  | 7.625 | 6.894 |
| 0.018 | 0.163 | -3.100 | 1.074  | 6.488 | 5.414 |
| 0.285 | 0.482 | -5.174 | 0.286  | 5.545 | 5.259 |
| 0.031 | 0.180 | -3.523 | -0.685 | 3.667 | 4.353 |
| 0.141 | 0.325 | -4.693 | 0.535  | 8.396 | 7.861 |
| 0.026 | 0.176 | -3.395 | 0.640  | 2.777 | 2.137 |
| 0.003 | 0.157 | -1.692 | 1.442  | 6.723 | 5.281 |
| 0.176 | 0.365 | -4.849 | 0.376  | 3.109 | 2.733 |
| 0.006 | 0.157 | -2.255 | -1.367 | 4.213 | 5.580 |
| 0.445 | 0.627 | -5.438 | -0.253 | 2.850 | 3.104 |
| 0.260 | 0.458 | -5.116 | 0.268  | 3.816 | 3.548 |
| 0.151 | 0.338 | -4.743 | 0.454  | 3.693 | 3.239 |
| 0.082 | 0.253 | -4.290 | 0.516  | 6.341 | 5.825 |
| 0.001 | 0.157 | -0.456 | 1.426  | 5.437 | 4.011 |
| 0.010 | 0.157 | -2.623 | -0.786 | 3.289 | 4.076 |
| 0.368 | 0.559 | -5.331 | -0.230 | 2.728 | 2.958 |
| 0.007 | 0.157 | -2.353 | -1.213 | 7.752 | 8.964 |
| 0.787 | 0.879 | -5.680 | 0.069  | 4.026 | 3.957 |
| 0.186 | 0.379 | -4.891 | -0.373 | 5.981 | 6.354 |

|       |       |        |        |       |       |
|-------|-------|--------|--------|-------|-------|
| 0.154 | 0.341 | -4.755 | -0.322 | 5.361 | 5.683 |
| 0.020 | 0.167 | -3.193 | -0.943 | 1.640 | 2.583 |
| 0.025 | 0.174 | -3.348 | 0.499  | 7.644 | 7.145 |
| 0.195 | 0.389 | -4.922 | 0.306  | 7.120 | 6.814 |
| 0.784 | 0.877 | -5.679 | 0.081  | 5.963 | 5.882 |
| 0.134 | 0.317 | -4.656 | -0.361 | 5.235 | 5.596 |
| 0.031 | 0.180 | -3.526 | 1.256  | 7.351 | 6.095 |
| 0.047 | 0.203 | -3.854 | 0.615  | 6.521 | 5.906 |
| 0.006 | 0.157 | -2.200 | 1.803  | 6.892 | 5.090 |
| 0.914 | 0.954 | -5.709 | 0.030  | 4.553 | 4.523 |
| 0.130 | 0.311 | -4.632 | 0.504  | 2.965 | 2.461 |
| 0.887 | 0.938 | -5.705 | -0.050 | 4.662 | 4.712 |
| 0.516 | 0.683 | -5.515 | 0.160  | 3.755 | 3.594 |
| 0.896 | 0.943 | -5.707 | 0.031  | 2.466 | 2.434 |
| 0.476 | 0.654 | -5.475 | -0.161 | 5.124 | 5.285 |
| 0.920 | 0.957 | -5.710 | -0.032 | 2.544 | 2.576 |
| 0.940 | 0.967 | -5.712 | 0.021  | 4.945 | 4.924 |
| 0.122 | 0.303 | -4.588 | -0.344 | 2.680 | 3.024 |
| 0.024 | 0.173 | -3.317 | 1.092  | 7.195 | 6.102 |
| 0.311 | 0.508 | -5.229 | -0.492 | 2.823 | 3.316 |
| 0.880 | 0.934 | -5.704 | 0.044  | 3.483 | 3.438 |
| 0.186 | 0.378 | -4.889 | 0.326  | 8.928 | 8.602 |
| 0.018 | 0.162 | -3.079 | -0.785 | 4.117 | 4.902 |
| 0.129 | 0.310 | -4.629 | 0.315  | 5.296 | 4.981 |
| 0.810 | 0.893 | -5.687 | -0.056 | 3.063 | 3.119 |
| 0.085 | 0.257 | -4.317 | 0.454  | 3.836 | 3.382 |
| 0.408 | 0.596 | -5.391 | -0.284 | 2.651 | 2.934 |
| 0.134 | 0.317 | -4.654 | 0.513  | 2.940 | 2.427 |
| 0.681 | 0.809 | -5.635 | 0.126  | 4.066 | 3.940 |
| 0.032 | 0.182 | -3.560 | -0.711 | 5.430 | 6.142 |
| 0.314 | 0.512 | -5.236 | -0.246 | 3.548 | 3.794 |
| 0.863 | 0.927 | -5.701 | 0.043  | 5.825 | 5.782 |
| 0.121 | 0.301 | -4.580 | 0.486  | 3.812 | 3.326 |
| 0.196 | 0.390 | -4.925 | 0.397  | 6.518 | 6.121 |
| 0.020 | 0.167 | -3.174 | -0.833 | 6.500 | 7.333 |
| 0.123 | 0.304 | -4.593 | -0.346 | 3.138 | 3.484 |
| 0.237 | 0.434 | -5.055 | 0.233  | 8.462 | 8.229 |
| 0.863 | 0.927 | -5.701 | -0.047 | 5.672 | 5.719 |
| 0.216 | 0.411 | -4.993 | -0.305 | 5.353 | 5.658 |
| 0.478 | 0.655 | -5.476 | -0.211 | 6.462 | 6.674 |
| 0.077 | 0.247 | -4.247 | 0.644  | 5.830 | 5.187 |
| 0.440 | 0.624 | -5.432 | 0.390  | 6.318 | 5.928 |
| 0.036 | 0.189 | -3.658 | -0.587 | 2.811 | 3.398 |
| 0.220 | 0.416 | -5.006 | 0.313  | 4.673 | 4.360 |
| 0.076 | 0.245 | -4.231 | 0.401  | 8.312 | 7.912 |
| 0.491 | 0.665 | -5.491 | 0.191  | 4.262 | 4.071 |
| 0.213 | 0.408 | -4.983 | 0.558  | 4.200 | 3.642 |
| 0.241 | 0.439 | -5.067 | -0.237 | 6.566 | 6.803 |
| 0.078 | 0.249 | -4.258 | 0.458  | 5.419 | 4.961 |
| 0.369 | 0.559 | -5.332 | 0.246  | 4.631 | 4.384 |

|       |       |        |        |       |       |
|-------|-------|--------|--------|-------|-------|
| 0.021 | 0.168 | -3.214 | -0.676 | 4.530 | 5.206 |
| 0.421 | 0.607 | -5.409 | 0.170  | 4.289 | 4.119 |
| 0.656 | 0.792 | -5.621 | -0.126 | 4.622 | 4.748 |
| 0.014 | 0.160 | -2.866 | 1.504  | 6.678 | 5.173 |
| 0.963 | 0.982 | -5.714 | 0.012  | 5.596 | 5.583 |
| 0.115 | 0.295 | -4.547 | 0.554  | 4.031 | 3.477 |
| 0.017 | 0.162 | -3.066 | -0.803 | 7.509 | 8.312 |
| 0.724 | 0.837 | -5.656 | -0.084 | 3.305 | 3.389 |
| 0.104 | 0.281 | -4.467 | -0.391 | 4.153 | 4.544 |
| 0.326 | 0.522 | -5.258 | -0.254 | 5.671 | 5.924 |
| 0.515 | 0.682 | -5.514 | 0.175  | 4.951 | 4.776 |
| 0.065 | 0.229 | -4.116 | -0.624 | 7.338 | 7.962 |
| 0.578 | 0.733 | -5.569 | -0.152 | 3.344 | 3.496 |
| 0.543 | 0.705 | -5.540 | -0.148 | 3.862 | 4.010 |
| 0.367 | 0.558 | -5.330 | 0.193  | 3.807 | 3.613 |
| 0.239 | 0.436 | -5.059 | 0.225  | 8.976 | 8.751 |
| 0.339 | 0.534 | -5.282 | 0.184  | 7.939 | 7.755 |
| 0.344 | 0.539 | -5.292 | 0.181  | 7.602 | 7.420 |
| 0.095 | 0.271 | -4.404 | 0.787  | 4.292 | 3.505 |
| 0.198 | 0.393 | -4.934 | -0.714 | 4.963 | 5.677 |
| 0.163 | 0.352 | -4.795 | -0.527 | 3.153 | 3.680 |
| 0.137 | 0.321 | -4.675 | -0.400 | 5.081 | 5.480 |
| 0.115 | 0.295 | -4.546 | 0.443  | 3.962 | 3.519 |
| 0.414 | 0.602 | -5.399 | 0.392  | 4.546 | 4.154 |
| 0.105 | 0.284 | -4.480 | 0.438  | 4.867 | 4.429 |
| 0.458 | 0.638 | -5.454 | -0.239 | 4.619 | 4.858 |
| 0.931 | 0.962 | -5.711 | -0.031 | 6.217 | 6.248 |
| 0.046 | 0.203 | -3.844 | 0.470  | 3.634 | 3.164 |
| 0.751 | 0.856 | -5.667 | -0.077 | 1.638 | 1.715 |
| 0.008 | 0.157 | -2.457 | 1.987  | 7.991 | 6.005 |
| 0.137 | 0.321 | -4.673 | 0.552  | 5.541 | 4.988 |
| 0.019 | 0.164 | -3.138 | 1.229  | 7.419 | 6.190 |
| 0.037 | 0.190 | -3.679 | 1.384  | 8.438 | 7.054 |
| 0.578 | 0.733 | -5.568 | -0.229 | 4.246 | 4.475 |
| 0.052 | 0.212 | -3.944 | -0.643 | 4.132 | 4.775 |
| 0.767 | 0.867 | -5.673 | 0.067  | 7.006 | 6.939 |
| 0.755 | 0.858 | -5.668 | -0.078 | 2.978 | 3.055 |
| 0.024 | 0.173 | -3.321 | -0.782 | 4.563 | 5.344 |
| 0.130 | 0.311 | -4.634 | 0.468  | 4.131 | 3.663 |
| 0.116 | 0.296 | -4.552 | -0.719 | 3.582 | 4.301 |
| 0.139 | 0.323 | -4.682 | 0.424  | 4.799 | 4.375 |
| 0.001 | 0.157 | -0.460 | 0.832  | 3.240 | 2.407 |
| 0.008 | 0.157 | -2.441 | 0.908  | 3.218 | 2.310 |
| 0.098 | 0.274 | -4.423 | -0.400 | 8.571 | 8.971 |
| 0.053 | 0.213 | -3.956 | 0.669  | 6.284 | 5.616 |
| 0.464 | 0.644 | -5.461 | 0.193  | 3.996 | 3.803 |
| 0.067 | 0.233 | -4.141 | -0.696 | 2.034 | 2.730 |
| 0.027 | 0.176 | -3.417 | 0.657  | 5.752 | 5.094 |
| 0.102 | 0.279 | -4.453 | 0.311  | 8.157 | 7.846 |
| 0.124 | 0.305 | -4.603 | -0.414 | 4.877 | 5.292 |

|       |       |        |        |        |        |
|-------|-------|--------|--------|--------|--------|
| 0.142 | 0.326 | -4.697 | 0.530  | 5.186  | 4.657  |
| 0.858 | 0.924 | -5.700 | 0.054  | 2.163  | 2.109  |
| 0.032 | 0.182 | -3.554 | 0.750  | 3.351  | 2.601  |
| 0.299 | 0.496 | -5.204 | 0.291  | 3.997  | 3.706  |
| 0.080 | 0.250 | -4.269 | 0.692  | 6.134  | 5.442  |
| 0.065 | 0.229 | -4.119 | 0.575  | 3.337  | 2.762  |
| 0.514 | 0.682 | -5.514 | -0.193 | 2.767  | 2.959  |
| 0.101 | 0.278 | -4.445 | 0.752  | 6.481  | 5.729  |
| 0.029 | 0.178 | -3.493 | 0.991  | 7.154  | 6.163  |
| 0.009 | 0.157 | -2.508 | 1.300  | 7.454  | 6.154  |
| 0.008 | 0.157 | -2.464 | 1.677  | 8.245  | 6.568  |
| 0.105 | 0.282 | -4.475 | 0.695  | 5.168  | 4.473  |
| 0.252 | 0.450 | -5.096 | 0.314  | 2.823  | 2.510  |
| 0.525 | 0.690 | -5.523 | -0.216 | 2.506  | 2.722  |
| 0.021 | 0.168 | -3.218 | 0.498  | 5.338  | 4.840  |
| 0.662 | 0.795 | -5.624 | -0.097 | 5.197  | 5.294  |
| 0.105 | 0.283 | -4.479 | 0.417  | 3.668  | 3.251  |
| 0.042 | 0.197 | -3.776 | 0.823  | 5.574  | 4.751  |
| 0.588 | 0.741 | -5.576 | 0.161  | 5.290  | 5.129  |
| 0.000 | 0.157 | 0.875  | 1.596  | 4.072  | 2.477  |
| 0.360 | 0.553 | -5.319 | 0.200  | 7.290  | 7.090  |
| 0.052 | 0.212 | -3.945 | 0.420  | 7.872  | 7.452  |
| 0.079 | 0.249 | -4.261 | -0.482 | 2.573  | 3.054  |
| 0.330 | 0.526 | -5.266 | -0.228 | 4.494  | 4.722  |
| 0.362 | 0.554 | -5.321 | 0.196  | 5.584  | 5.387  |
| 0.661 | 0.794 | -5.624 | 0.093  | 6.990  | 6.897  |
| 0.161 | 0.350 | -4.788 | -0.249 | 10.414 | 10.663 |
| 0.691 | 0.815 | -5.640 | -0.127 | 4.575  | 4.702  |
| 0.063 | 0.226 | -4.089 | -0.451 | 10.530 | 10.981 |
| 0.690 | 0.815 | -5.639 | -0.146 | 3.923  | 4.069  |
| 0.001 | 0.157 | -0.928 | 1.467  | 3.345  | 1.878  |
| 0.205 | 0.401 | -4.958 | -0.351 | 5.488  | 5.839  |
| 0.358 | 0.552 | -5.316 | 0.225  | 2.705  | 2.480  |
| 0.020 | 0.166 | -3.165 | -1.224 | 1.809  | 3.033  |
| 0.048 | 0.205 | -3.877 | -0.637 | 3.172  | 3.809  |
| 0.747 | 0.853 | -5.666 | 0.140  | 3.138  | 2.999  |
| 0.658 | 0.793 | -5.622 | 0.121  | 2.747  | 2.626  |
| 0.588 | 0.741 | -5.576 | -0.137 | 2.594  | 2.731  |
| 0.952 | 0.975 | -5.713 | -0.017 | 5.354  | 5.371  |
| 0.294 | 0.491 | -5.194 | -0.262 | 2.319  | 2.581  |
| 0.482 | 0.658 | -5.481 | -0.405 | 2.655  | 3.060  |
| 0.017 | 0.162 | -3.065 | -0.757 | 3.367  | 4.124  |
| 0.749 | 0.854 | -5.666 | -0.080 | 2.035  | 2.115  |
| 0.957 | 0.978 | -5.713 | -0.016 | 2.795  | 2.811  |
| 0.071 | 0.238 | -4.178 | -0.644 | 2.420  | 3.064  |
| 0.036 | 0.189 | -3.661 | -1.306 | 2.730  | 4.036  |
| 0.219 | 0.415 | -5.002 | 0.520  | 4.185  | 3.665  |
| 0.248 | 0.445 | -5.083 | -0.284 | 5.564  | 5.848  |
| 0.232 | 0.428 | -5.039 | -0.627 | 3.979  | 4.606  |
| 0.614 | 0.759 | -5.594 | -0.137 | 2.709  | 2.846  |

|       |       |        |        |       |       |
|-------|-------|--------|--------|-------|-------|
| 0.643 | 0.780 | -5.613 | -0.183 | 2.508 | 2.691 |
| 0.839 | 0.911 | -5.695 | -0.056 | 4.304 | 4.360 |
| 0.960 | 0.979 | -5.714 | -0.018 | 2.863 | 2.880 |
| 0.468 | 0.647 | -5.465 | -0.217 | 4.035 | 4.252 |
| 0.460 | 0.640 | -5.456 | 0.350  | 2.694 | 2.344 |
| 0.819 | 0.898 | -5.690 | 0.103  | 3.116 | 3.014 |
| 0.854 | 0.921 | -5.699 | -0.062 | 2.560 | 2.622 |
| 0.823 | 0.900 | -5.691 | -0.080 | 3.095 | 3.175 |
| 0.996 | 0.998 | -5.715 | 0.002  | 3.887 | 3.885 |
| 0.533 | 0.696 | -5.530 | 0.268  | 3.763 | 3.495 |
| 0.201 | 0.396 | -4.942 | 0.454  | 3.204 | 2.750 |
| 0.044 | 0.201 | -3.817 | 0.652  | 3.343 | 2.691 |
| 0.837 | 0.909 | -5.695 | 0.072  | 3.102 | 3.031 |
| 0.659 | 0.793 | -5.622 | -0.094 | 5.553 | 5.648 |
| 0.299 | 0.496 | -5.205 | 0.396  | 2.473 | 2.077 |
| 0.242 | 0.439 | -5.068 | 0.478  | 2.741 | 2.264 |
| 0.338 | 0.534 | -5.281 | -0.339 | 4.743 | 5.082 |
| 0.709 | 0.827 | -5.649 | -0.178 | 2.835 | 3.012 |
| 0.921 | 0.958 | -5.710 | -0.036 | 3.706 | 3.742 |
| 0.820 | 0.898 | -5.690 | -0.056 | 3.779 | 3.834 |
| 0.254 | 0.452 | -5.100 | -0.241 | 2.745 | 2.986 |
| 0.136 | 0.320 | -4.668 | 0.564  | 2.321 | 1.757 |
| 0.126 | 0.306 | -4.609 | 0.583  | 2.838 | 2.254 |
| 0.562 | 0.721 | -5.556 | 0.173  | 3.195 | 3.022 |
| 0.388 | 0.576 | -5.363 | 0.356  | 5.022 | 4.666 |
| 0.984 | 0.991 | -5.715 | -0.005 | 2.295 | 2.300 |
| 0.107 | 0.286 | -4.494 | 0.980  | 4.803 | 3.823 |
| 0.319 | 0.517 | -5.246 | -0.326 | 4.125 | 4.451 |
| 0.204 | 0.399 | -4.954 | 0.334  | 9.747 | 9.413 |
| 0.380 | 0.569 | -5.350 | 0.222  | 8.970 | 8.748 |
| 0.561 | 0.720 | -5.555 | -0.199 | 1.944 | 2.143 |
| 0.323 | 0.519 | -5.252 | -0.271 | 1.938 | 2.209 |
| 0.363 | 0.554 | -5.323 | -0.373 | 3.482 | 3.855 |
| 0.650 | 0.786 | -5.617 | 0.162  | 2.144 | 1.981 |
| 0.370 | 0.560 | -5.334 | -0.334 | 3.850 | 4.184 |
| 0.841 | 0.912 | -5.696 | 0.054  | 2.590 | 2.536 |
| 0.305 | 0.503 | -5.217 | -0.296 | 2.438 | 2.734 |
| 0.153 | 0.340 | -4.750 | -0.546 | 2.340 | 2.886 |
| 0.449 | 0.631 | -5.444 | -0.238 | 2.915 | 3.154 |
| 0.420 | 0.606 | -5.407 | 0.266  | 3.093 | 2.827 |
| 0.355 | 0.549 | -5.309 | -0.454 | 3.805 | 4.258 |
| 0.552 | 0.712 | -5.547 | 0.170  | 2.578 | 2.408 |
| 0.888 | 0.939 | -5.705 | -0.047 | 2.811 | 2.858 |
| 0.990 | 0.995 | -5.715 | 0.006  | 2.980 | 2.974 |
| 0.910 | 0.951 | -5.709 | 0.052  | 2.703 | 2.650 |
| 0.059 | 0.220 | -4.034 | -0.556 | 4.013 | 4.569 |
| 0.919 | 0.957 | -5.710 | 0.035  | 2.244 | 2.209 |
| 0.163 | 0.352 | -4.796 | 0.560  | 2.824 | 2.264 |
| 0.477 | 0.655 | -5.476 | -0.261 | 2.373 | 2.634 |
| 0.852 | 0.920 | -5.698 | -0.059 | 3.228 | 3.287 |

|       |       |        |        |       |       |
|-------|-------|--------|--------|-------|-------|
| 0.163 | 0.352 | -4.797 | -0.407 | 2.563 | 2.971 |
| 0.073 | 0.241 | -4.203 | 0.704  | 3.597 | 2.893 |
| 0.026 | 0.176 | -3.401 | -0.618 | 2.434 | 3.052 |
| 0.132 | 0.314 | -4.643 | -0.608 | 1.942 | 2.549 |
| 0.336 | 0.532 | -5.277 | -0.331 | 3.013 | 3.343 |
| 0.953 | 0.976 | -5.713 | 0.023  | 3.224 | 3.201 |
| 0.607 | 0.754 | -5.590 | -0.162 | 4.165 | 4.327 |
| 0.378 | 0.568 | -5.348 | -0.288 | 4.220 | 4.508 |
| 0.061 | 0.223 | -4.063 | -0.696 | 2.536 | 3.232 |
| 0.512 | 0.680 | -5.511 | 0.215  | 2.798 | 2.584 |
| 0.028 | 0.178 | -3.456 | 0.890  | 2.632 | 1.742 |
| 0.118 | 0.298 | -4.565 | 0.611  | 4.096 | 3.485 |
| 0.493 | 0.667 | -5.493 | -0.278 | 2.527 | 2.806 |
| 0.504 | 0.673 | -5.503 | -0.228 | 3.618 | 3.846 |
| 0.167 | 0.356 | -4.812 | -0.502 | 1.998 | 2.501 |
| 0.197 | 0.392 | -4.931 | -0.371 | 4.557 | 4.928 |
| 0.252 | 0.450 | -5.094 | -0.348 | 3.461 | 3.809 |
| 0.200 | 0.396 | -4.941 | 0.568  | 4.517 | 3.949 |
| 0.286 | 0.483 | -5.176 | 0.330  | 2.577 | 2.247 |
| 0.466 | 0.645 | -5.463 | -0.288 | 2.224 | 2.512 |
| 0.805 | 0.890 | -5.686 | -0.066 | 2.239 | 2.304 |
| 0.069 | 0.236 | -4.162 | -0.470 | 3.572 | 4.042 |
| 0.032 | 0.182 | -3.556 | -0.844 | 2.777 | 3.621 |
| 0.780 | 0.874 | -5.678 | -0.083 | 2.403 | 2.486 |
| 0.197 | 0.391 | -4.929 | -0.368 | 2.608 | 2.976 |
| 0.136 | 0.320 | -4.669 | -0.459 | 2.791 | 3.251 |
| 0.245 | 0.443 | -5.077 | 0.374  | 2.500 | 2.127 |
| 0.948 | 0.973 | -5.713 | -0.022 | 2.592 | 2.614 |
| 0.622 | 0.765 | -5.600 | -0.152 | 2.685 | 2.837 |
| 0.263 | 0.461 | -5.122 | 0.306  | 5.196 | 4.890 |
| 0.409 | 0.596 | -5.392 | 0.395  | 3.055 | 2.659 |
| 0.496 | 0.668 | -5.495 | -0.215 | 3.725 | 3.940 |
| 0.524 | 0.689 | -5.522 | -0.189 | 2.107 | 2.296 |
| 0.751 | 0.856 | -5.667 | 0.111  | 2.670 | 2.559 |
| 0.605 | 0.753 | -5.588 | 0.196  | 2.855 | 2.659 |
| 0.451 | 0.632 | -5.446 | 0.318  | 6.067 | 5.749 |
| 0.180 | 0.372 | -4.868 | 0.349  | 3.365 | 3.016 |
| 0.743 | 0.851 | -5.664 | 0.120  | 4.214 | 4.094 |
| 0.129 | 0.311 | -4.630 | -0.508 | 5.269 | 5.777 |
| 0.841 | 0.912 | -5.696 | -0.163 | 4.972 | 5.135 |
| 0.924 | 0.959 | -5.711 | 0.065  | 2.969 | 2.903 |
| 0.230 | 0.427 | -5.034 | -0.571 | 4.713 | 5.284 |
| 0.249 | 0.447 | -5.087 | 0.298  | 4.452 | 4.154 |
| 0.024 | 0.173 | -3.330 | -0.678 | 4.605 | 5.283 |
| 0.010 | 0.157 | -2.616 | 1.208  | 6.175 | 4.967 |
| 0.102 | 0.280 | -4.459 | -0.547 | 6.903 | 7.450 |
| 0.084 | 0.256 | -4.312 | 0.523  | 3.799 | 3.276 |
| 0.041 | 0.195 | -3.756 | 0.398  | 8.991 | 8.593 |
| 0.839 | 0.911 | -5.695 | 0.041  | 6.591 | 6.550 |
| 0.162 | 0.350 | -4.790 | 0.397  | 4.532 | 4.135 |

|       |       |        |        |       |       |
|-------|-------|--------|--------|-------|-------|
| 0.996 | 0.998 | -5.715 | 0.001  | 2.121 | 2.120 |
| 0.769 | 0.868 | -5.674 | 0.110  | 3.684 | 3.574 |
| 0.025 | 0.175 | -3.371 | -1.124 | 3.179 | 4.302 |
| 0.447 | 0.629 | -5.442 | 0.222  | 4.893 | 4.671 |
| 0.021 | 0.168 | -3.226 | 0.659  | 3.648 | 2.989 |
| 0.091 | 0.266 | -4.369 | -0.429 | 7.539 | 7.968 |
| 0.008 | 0.157 | -2.463 | -0.724 | 6.278 | 7.003 |
| 0.142 | 0.327 | -4.700 | -0.511 | 2.738 | 3.249 |
| 0.980 | 0.989 | -5.714 | -0.007 | 3.393 | 3.400 |
| 0.251 | 0.448 | -5.091 | -0.292 | 5.979 | 6.271 |
| 0.041 | 0.195 | -3.756 | 0.931  | 4.521 | 3.589 |
| 0.832 | 0.906 | -5.694 | 0.069  | 4.849 | 4.780 |
| 0.087 | 0.259 | -4.334 | 0.351  | 6.492 | 6.141 |
| 0.624 | 0.767 | -5.601 | 0.154  | 5.398 | 5.244 |
| 0.320 | 0.517 | -5.247 | 0.243  | 4.929 | 4.686 |
| 0.046 | 0.203 | -3.852 | 0.582  | 8.118 | 7.535 |
| 0.023 | 0.173 | -3.310 | 1.087  | 5.582 | 4.495 |
| 0.059 | 0.221 | -4.040 | 0.937  | 5.776 | 4.840 |
| 0.448 | 0.630 | -5.443 | 0.194  | 4.659 | 4.465 |
| 0.454 | 0.635 | -5.450 | 0.266  | 2.811 | 2.544 |
| 0.719 | 0.834 | -5.654 | 0.074  | 6.571 | 6.497 |
| 0.758 | 0.860 | -5.670 | 0.069  | 5.681 | 5.612 |
| 0.035 | 0.186 | -3.623 | 0.549  | 3.434 | 2.885 |
| 0.015 | 0.160 | -2.931 | -0.713 | 5.626 | 6.339 |
| 0.087 | 0.260 | -4.336 | -0.527 | 3.047 | 3.574 |
| 0.160 | 0.349 | -4.785 | 0.354  | 6.186 | 5.832 |
| 0.318 | 0.516 | -5.243 | -0.355 | 4.478 | 4.833 |
| 0.969 | 0.985 | -5.714 | -0.013 | 4.745 | 4.758 |
| 0.029 | 0.178 | -3.490 | -0.714 | 4.997 | 5.712 |
| 0.416 | 0.603 | -5.401 | -0.223 | 2.714 | 2.937 |
| 0.421 | 0.607 | -5.408 | 0.173  | 7.133 | 6.961 |
| 0.082 | 0.254 | -4.292 | 0.547  | 3.805 | 3.258 |
| 0.441 | 0.625 | -5.433 | -0.221 | 3.375 | 3.596 |
| 0.064 | 0.228 | -4.107 | 0.436  | 7.251 | 6.814 |
| 0.375 | 0.565 | -5.342 | 0.186  | 5.129 | 4.943 |
| 0.036 | 0.189 | -3.661 | 0.554  | 6.733 | 6.178 |
| 0.187 | 0.379 | -4.894 | 0.262  | 6.175 | 5.914 |
| 0.034 | 0.184 | -3.601 | -0.530 | 5.599 | 6.129 |
| 0.078 | 0.247 | -4.250 | 0.450  | 6.514 | 6.064 |
| 0.062 | 0.225 | -4.077 | 0.419  | 5.009 | 4.590 |
| 0.490 | 0.664 | -5.489 | 0.167  | 7.470 | 7.303 |
| 0.053 | 0.213 | -3.954 | -0.444 | 3.826 | 4.270 |
| 0.921 | 0.958 | -5.710 | -0.043 | 3.838 | 3.880 |
| 0.157 | 0.345 | -4.771 | 0.683  | 5.448 | 4.765 |
| 0.231 | 0.428 | -5.036 | -0.485 | 8.297 | 8.781 |
| 0.478 | 0.655 | -5.477 | -0.333 | 2.781 | 3.114 |
| 0.165 | 0.354 | -4.804 | -0.614 | 1.419 | 2.032 |
| 0.721 | 0.835 | -5.654 | 0.118  | 2.294 | 2.176 |
| 0.482 | 0.658 | -5.481 | -0.172 | 2.099 | 2.270 |
| 0.443 | 0.626 | -5.437 | -0.210 | 5.187 | 5.397 |



|       |       |        |        |       |       |
|-------|-------|--------|--------|-------|-------|
| 0.124 | 0.305 | -4.600 | 0.534  | 4.595 | 4.060 |
| 0.408 | 0.596 | -5.391 | 0.239  | 3.686 | 3.447 |
| 0.865 | 0.928 | -5.701 | 0.044  | 4.393 | 4.350 |
| 0.880 | 0.935 | -5.704 | 0.059  | 2.238 | 2.179 |
| 0.614 | 0.759 | -5.595 | 0.163  | 4.604 | 4.441 |
| 0.363 | 0.554 | -5.323 | -0.332 | 3.287 | 3.619 |
| 0.741 | 0.850 | -5.663 | 0.080  | 2.339 | 2.260 |
| 0.879 | 0.934 | -5.704 | -0.047 | 4.256 | 4.303 |
| 0.745 | 0.852 | -5.665 | 0.093  | 3.246 | 3.154 |
| 0.543 | 0.705 | -5.540 | -0.158 | 4.441 | 4.599 |
| 0.290 | 0.488 | -5.185 | -0.321 | 5.281 | 5.603 |
| 0.169 | 0.359 | -4.823 | 0.456  | 3.732 | 3.276 |
| 0.321 | 0.518 | -5.249 | 0.438  | 4.080 | 3.642 |
| 0.334 | 0.530 | -5.274 | -0.311 | 6.495 | 6.806 |
| 0.581 | 0.736 | -5.571 | 0.334  | 4.868 | 4.535 |
| 0.111 | 0.290 | -4.516 | -0.476 | 2.769 | 3.244 |
| 0.926 | 0.960 | -5.711 | 0.034  | 2.682 | 2.648 |
| 0.098 | 0.275 | -4.427 | -0.477 | 2.276 | 2.753 |
| 0.984 | 0.991 | -5.715 | 0.008  | 1.370 | 1.362 |
| 0.092 | 0.267 | -4.379 | -0.445 | 3.187 | 3.632 |
| 0.704 | 0.824 | -5.646 | 0.113  | 2.587 | 2.474 |
| 0.647 | 0.784 | -5.615 | 0.185  | 3.452 | 3.267 |
| 0.292 | 0.490 | -5.190 | -0.308 | 2.340 | 2.648 |
| 0.595 | 0.746 | -5.581 | 0.207  | 2.165 | 1.958 |
| 0.137 | 0.321 | -4.673 | -0.464 | 6.953 | 7.418 |
| 0.174 | 0.364 | -4.843 | -0.397 | 4.347 | 4.744 |
| 0.179 | 0.370 | -4.864 | -0.349 | 4.058 | 4.407 |
| 0.036 | 0.189 | -3.657 | -0.746 | 3.309 | 4.054 |
| 0.575 | 0.730 | -5.566 | -0.160 | 2.835 | 2.995 |
| 0.363 | 0.554 | -5.323 | -0.321 | 2.859 | 3.180 |
| 0.270 | 0.468 | -5.140 | -0.356 | 2.812 | 3.169 |
| 0.266 | 0.465 | -5.131 | -0.364 | 4.410 | 4.774 |
| 0.682 | 0.809 | -5.635 | 0.118  | 3.204 | 3.086 |
| 0.647 | 0.784 | -5.616 | 0.152  | 2.522 | 2.370 |
| 0.531 | 0.695 | -5.529 | -0.261 | 3.473 | 3.734 |
| 0.081 | 0.253 | -4.286 | -0.527 | 5.118 | 5.645 |
| 0.970 | 0.985 | -5.714 | -0.011 | 2.177 | 2.188 |
| 0.222 | 0.418 | -5.009 | 0.437  | 4.163 | 3.726 |
| 0.378 | 0.567 | -5.346 | -0.185 | 9.502 | 9.687 |
| 0.481 | 0.658 | -5.480 | -0.303 | 5.495 | 5.797 |
| 0.423 | 0.609 | -5.411 | -0.418 | 2.646 | 3.064 |
| 0.061 | 0.224 | -4.068 | -0.926 | 2.125 | 3.051 |
| 0.905 | 0.949 | -5.708 | 0.045  | 4.087 | 4.042 |
| 0.643 | 0.781 | -5.613 | -0.309 | 2.731 | 3.040 |
| 0.417 | 0.604 | -5.402 | -0.392 | 7.107 | 7.498 |
| 0.441 | 0.625 | -5.434 | -0.210 | 4.840 | 5.049 |
| 0.415 | 0.603 | -5.401 | 0.364  | 2.286 | 1.922 |
| 0.001 | 0.157 | -0.656 | 1.127  | 2.598 | 1.471 |
| 0.491 | 0.665 | -5.490 | -0.213 | 5.345 | 5.557 |
| 0.666 | 0.798 | -5.627 | 0.183  | 2.136 | 1.953 |

|       |       |        |        |       |       |
|-------|-------|--------|--------|-------|-------|
| 0.955 | 0.977 | -5.713 | 0.025  | 2.312 | 2.288 |
| 0.024 | 0.173 | -3.336 | -1.768 | 3.523 | 5.291 |
| 0.573 | 0.728 | -5.564 | -0.214 | 4.981 | 5.195 |
| 0.079 | 0.249 | -4.262 | -0.404 | 4.337 | 4.741 |
| 0.381 | 0.570 | -5.352 | -0.422 | 2.076 | 2.498 |
| 0.887 | 0.938 | -5.705 | -0.067 | 2.556 | 2.623 |
| 0.444 | 0.627 | -5.438 | 0.318  | 3.527 | 3.209 |
| 0.231 | 0.428 | -5.038 | -0.450 | 4.044 | 4.494 |
| 0.233 | 0.429 | -5.042 | -0.382 | 2.505 | 2.887 |
| 0.947 | 0.973 | -5.713 | -0.017 | 4.099 | 4.117 |
| 0.564 | 0.721 | -5.558 | -0.167 | 2.473 | 2.640 |
| 0.446 | 0.628 | -5.440 | -0.208 | 2.873 | 3.081 |
| 0.495 | 0.667 | -5.494 | 0.206  | 2.703 | 2.497 |
| 0.129 | 0.310 | -4.626 | -0.596 | 2.340 | 2.936 |
| 0.679 | 0.808 | -5.634 | 0.156  | 4.958 | 4.802 |
| 0.343 | 0.539 | -5.290 | -0.257 | 1.691 | 1.948 |
| 0.021 | 0.168 | -3.212 | -0.880 | 2.318 | 3.198 |
| 0.302 | 0.500 | -5.211 | -0.320 | 2.238 | 2.559 |
| 0.094 | 0.270 | -4.396 | 0.602  | 5.417 | 4.815 |
| 0.052 | 0.212 | -3.947 | -0.920 | 1.929 | 2.849 |
| 0.328 | 0.523 | -5.262 | 0.291  | 2.075 | 1.785 |
| 0.911 | 0.952 | -5.709 | -0.049 | 3.398 | 3.447 |
| 0.770 | 0.868 | -5.674 | 0.139  | 3.793 | 3.654 |
| 0.216 | 0.411 | -4.991 | -0.312 | 6.593 | 6.905 |
| 0.331 | 0.526 | -5.267 | -0.263 | 3.148 | 3.411 |
| 0.146 | 0.330 | -4.716 | -0.449 | 3.839 | 4.288 |
| 0.595 | 0.746 | -5.581 | -0.230 | 3.034 | 3.264 |
| 0.033 | 0.184 | -3.581 | -0.978 | 1.538 | 2.516 |
| 0.286 | 0.483 | -5.176 | -0.316 | 1.447 | 1.763 |
| 0.478 | 0.655 | -5.476 | -0.305 | 3.119 | 3.424 |
| 0.921 | 0.958 | -5.710 | 0.034  | 2.924 | 2.890 |
| 0.459 | 0.640 | -5.456 | -0.322 | 3.443 | 3.765 |
| 0.166 | 0.355 | -4.810 | -0.558 | 2.067 | 2.625 |
| 0.595 | 0.746 | -5.581 | -0.151 | 2.620 | 2.771 |
| 0.029 | 0.178 | -3.486 | 0.840  | 3.334 | 2.493 |
| 0.754 | 0.858 | -5.668 | 0.096  | 4.007 | 3.911 |
| 0.411 | 0.598 | -5.395 | -0.251 | 3.621 | 3.872 |
| 0.014 | 0.160 | -2.886 | 0.917  | 5.085 | 4.168 |
| 0.016 | 0.162 | -3.022 | 0.822  | 4.669 | 3.848 |
| 0.013 | 0.160 | -2.838 | 0.863  | 4.829 | 3.966 |
| 0.049 | 0.207 | -3.894 | -1.035 | 2.156 | 3.190 |
| 0.062 | 0.225 | -4.080 | -0.660 | 2.159 | 2.819 |
| 0.623 | 0.766 | -5.600 | 0.174  | 3.355 | 3.181 |
| 0.879 | 0.934 | -5.704 | 0.050  | 3.755 | 3.705 |
| 0.023 | 0.173 | -3.302 | 1.076  | 4.073 | 2.996 |
| 0.874 | 0.932 | -5.703 | 0.042  | 2.714 | 2.672 |
| 0.249 | 0.447 | -5.087 | -0.300 | 3.612 | 3.912 |
| 0.568 | 0.724 | -5.560 | 0.205  | 2.626 | 2.421 |
| 0.127 | 0.308 | -4.619 | -0.564 | 2.440 | 3.003 |
| 0.661 | 0.794 | -5.624 | -0.112 | 3.147 | 3.259 |

|       |       |        |        |       |       |
|-------|-------|--------|--------|-------|-------|
| 0.859 | 0.924 | -5.700 | 0.066  | 4.005 | 3.940 |
| 0.835 | 0.908 | -5.694 | 0.076  | 2.397 | 2.321 |
| 0.573 | 0.728 | -5.565 | 0.265  | 4.141 | 3.876 |
| 0.026 | 0.175 | -3.382 | -0.846 | 1.813 | 2.659 |
| 0.581 | 0.735 | -5.570 | -0.209 | 0.978 | 1.186 |
| 0.510 | 0.679 | -5.509 | -0.184 | 2.177 | 2.362 |
| 0.867 | 0.928 | -5.702 | -0.057 | 3.897 | 3.954 |
| 0.635 | 0.774 | -5.608 | -0.136 | 2.330 | 2.467 |
| 0.096 | 0.271 | -4.407 | 0.759  | 5.212 | 4.453 |
| 0.998 | 0.999 | -5.715 | 0.001  | 2.891 | 2.890 |
| 0.092 | 0.267 | -4.380 | 0.607  | 1.709 | 1.102 |
| 0.501 | 0.671 | -5.500 | 0.189  | 3.449 | 3.259 |
| 0.978 | 0.989 | -5.714 | 0.010  | 3.409 | 3.400 |
| 0.540 | 0.702 | -5.537 | -0.263 | 2.884 | 3.147 |
| 0.263 | 0.461 | -5.124 | 0.434  | 2.484 | 2.050 |
| 0.020 | 0.167 | -3.184 | 1.083  | 4.238 | 3.154 |
| 0.030 | 0.179 | -3.509 | 1.056  | 4.501 | 3.445 |
| 0.669 | 0.800 | -5.628 | -0.129 | 1.971 | 2.100 |
| 0.483 | 0.659 | -5.482 | 0.194  | 2.922 | 2.728 |
| 0.713 | 0.829 | -5.651 | 0.137  | 4.772 | 4.635 |
| 0.910 | 0.951 | -5.709 | -0.026 | 5.228 | 5.253 |
| 0.918 | 0.956 | -5.710 | -0.031 | 2.424 | 2.456 |
| 0.626 | 0.767 | -5.602 | 0.160  | 2.801 | 2.640 |
| 0.987 | 0.993 | -5.715 | -0.005 | 3.428 | 3.433 |
| 0.443 | 0.626 | -5.437 | -0.276 | 2.745 | 3.021 |
| 0.769 | 0.868 | -5.674 | -0.101 | 3.994 | 4.095 |
| 0.054 | 0.215 | -3.971 | -0.564 | 2.276 | 2.840 |
| 0.814 | 0.895 | -5.689 | -0.060 | 3.114 | 3.173 |
| 0.619 | 0.763 | -5.598 | 0.152  | 2.569 | 2.416 |
| 0.004 | 0.157 | -1.857 | -2.260 | 3.110 | 5.370 |
| 0.002 | 0.157 | -1.251 | 0.886  | 2.731 | 1.845 |
| 0.640 | 0.779 | -5.611 | -0.186 | 2.702 | 2.888 |
| 0.697 | 0.820 | -5.643 | -0.153 | 3.408 | 3.562 |
| 0.145 | 0.329 | -4.713 | -0.669 | 3.190 | 3.860 |
| 0.761 | 0.862 | -5.671 | -0.084 | 4.188 | 4.272 |
| 0.574 | 0.728 | -5.565 | -0.182 | 2.770 | 2.951 |
| 0.359 | 0.552 | -5.317 | -0.324 | 4.430 | 4.754 |
| 0.464 | 0.644 | -5.461 | -0.226 | 4.604 | 4.830 |
| 0.370 | 0.561 | -5.335 | -0.527 | 2.943 | 3.470 |
| 0.004 | 0.157 | -1.806 | -1.516 | 3.728 | 5.244 |
| 0.756 | 0.859 | -5.669 | 0.141  | 2.797 | 2.656 |
| 0.556 | 0.715 | -5.550 | 0.193  | 4.091 | 3.898 |
| 0.523 | 0.689 | -5.521 | -0.299 | 2.311 | 2.609 |
| 0.184 | 0.376 | -4.884 | -0.393 | 5.368 | 5.761 |
| 0.167 | 0.357 | -4.814 | -0.578 | 4.639 | 5.217 |
| 0.069 | 0.236 | -4.164 | 0.452  | 2.571 | 2.119 |
| 0.788 | 0.879 | -5.680 | 0.079  | 3.701 | 3.622 |
| 0.518 | 0.685 | -5.517 | -0.243 | 4.221 | 4.464 |
| 0.048 | 0.205 | -3.877 | -0.723 | 2.289 | 3.013 |
| 0.753 | 0.857 | -5.668 | -0.106 | 2.316 | 2.422 |

|       |       |        |        |       |       |
|-------|-------|--------|--------|-------|-------|
| 0.583 | 0.736 | -5.572 | -0.172 | 5.018 | 5.190 |
| 0.394 | 0.581 | -5.371 | -0.255 | 2.345 | 2.600 |
| 0.462 | 0.643 | -5.459 | -0.264 | 2.621 | 2.885 |
| 0.131 | 0.312 | -4.638 | -0.555 | 3.136 | 3.691 |
| 0.012 | 0.159 | -2.743 | -0.831 | 3.423 | 4.254 |
| 0.865 | 0.928 | -5.701 | 0.058  | 2.857 | 2.800 |
| 0.478 | 0.655 | -5.477 | 0.269  | 2.159 | 1.891 |
| 0.469 | 0.648 | -5.466 | -0.224 | 3.199 | 3.423 |
| 0.123 | 0.304 | -4.595 | -0.489 | 2.472 | 2.960 |
| 0.135 | 0.319 | -4.663 | -0.696 | 2.295 | 2.991 |
| 0.924 | 0.959 | -5.710 | 0.046  | 2.926 | 2.880 |
| 0.309 | 0.507 | -5.226 | -0.280 | 2.875 | 3.154 |
| 0.157 | 0.345 | -4.768 | -0.505 | 2.040 | 2.545 |
| 0.637 | 0.776 | -5.609 | -0.189 | 2.428 | 2.618 |
| 0.957 | 0.978 | -5.713 | -0.021 | 2.777 | 2.798 |
| 0.937 | 0.966 | -5.712 | -0.026 | 5.551 | 5.577 |
| 0.775 | 0.871 | -5.676 | -0.103 | 2.123 | 2.226 |
| 0.633 | 0.773 | -5.607 | 0.123  | 4.046 | 3.922 |
| 0.032 | 0.183 | -3.564 | 0.982  | 6.102 | 5.120 |
| 0.777 | 0.872 | -5.677 | -0.094 | 2.294 | 2.388 |
| 0.609 | 0.756 | -5.591 | -0.127 | 3.377 | 3.504 |
| 0.578 | 0.733 | -5.568 | 0.195  | 2.357 | 2.162 |
| 0.041 | 0.195 | -3.759 | -0.719 | 4.070 | 4.789 |
| 0.949 | 0.974 | -5.713 | -0.031 | 2.731 | 2.762 |
| 0.192 | 0.384 | -4.911 | 0.547  | 5.496 | 4.949 |
| 0.237 | 0.434 | -5.055 | -0.562 | 2.666 | 3.228 |
| 0.718 | 0.833 | -5.653 | 0.104  | 4.385 | 4.280 |
| 0.820 | 0.898 | -5.690 | -0.090 | 2.495 | 2.585 |
| 0.214 | 0.409 | -4.986 | -0.447 | 3.512 | 3.959 |
| 0.014 | 0.160 | -2.886 | -0.812 | 4.283 | 5.096 |
| 0.284 | 0.482 | -5.172 | -0.400 | 3.039 | 3.439 |
| 0.381 | 0.570 | -5.352 | -0.334 | 2.249 | 2.582 |
| 0.145 | 0.329 | -4.712 | 0.726  | 2.957 | 2.231 |
| 0.940 | 0.967 | -5.712 | 0.027  | 2.398 | 2.370 |
| 0.257 | 0.455 | -5.109 | 0.584  | 3.424 | 2.841 |
| 0.173 | 0.362 | -4.837 | -0.443 | 3.024 | 3.467 |
| 0.428 | 0.614 | -5.418 | 0.234  | 2.504 | 2.271 |
| 0.226 | 0.423 | -5.023 | -0.596 | 3.952 | 4.548 |
| 0.299 | 0.496 | -5.205 | 0.325  | 4.262 | 3.937 |
| 0.470 | 0.648 | -5.467 | 0.205  | 2.762 | 2.558 |
| 0.577 | 0.732 | -5.568 | -0.197 | 2.870 | 3.068 |
| 0.660 | 0.793 | -5.623 | -0.120 | 3.230 | 3.350 |
| 0.332 | 0.527 | -5.269 | -0.312 | 1.916 | 2.228 |
| 0.885 | 0.937 | -5.705 | -0.050 | 3.346 | 3.396 |
| 0.020 | 0.167 | -3.195 | -1.254 | 2.220 | 3.474 |
| 0.824 | 0.900 | -5.691 | -0.106 | 2.525 | 2.631 |
| 0.466 | 0.645 | -5.463 | -0.248 | 4.384 | 4.632 |
| 0.017 | 0.162 | -3.053 | 0.757  | 2.556 | 1.799 |
| 0.092 | 0.267 | -4.377 | -0.927 | 1.384 | 2.311 |
| 0.640 | 0.778 | -5.611 | -0.251 | 3.530 | 3.781 |

|       |       |        |        |       |       |
|-------|-------|--------|--------|-------|-------|
| 0.219 | 0.414 | -5.001 | 0.336  | 3.367 | 3.031 |
| 0.274 | 0.472 | -5.150 | -0.319 | 2.372 | 2.691 |
| 0.158 | 0.347 | -4.776 | 0.426  | 2.683 | 2.257 |
| 0.514 | 0.681 | -5.513 | 0.203  | 6.907 | 6.704 |
| 0.095 | 0.271 | -4.400 | 0.713  | 4.620 | 3.907 |
| 0.234 | 0.431 | -5.046 | -0.316 | 2.282 | 2.598 |
| 0.786 | 0.878 | -5.680 | 0.083  | 4.042 | 3.959 |
| 0.597 | 0.747 | -5.582 | -0.166 | 2.477 | 2.643 |
| 0.473 | 0.652 | -5.471 | 0.203  | 6.212 | 6.009 |
| 0.556 | 0.716 | -5.551 | 0.176  | 4.341 | 4.165 |
| 0.325 | 0.521 | -5.256 | 0.312  | 3.139 | 2.827 |
| 0.140 | 0.324 | -4.688 | 0.390  | 2.479 | 2.089 |
| 0.510 | 0.679 | -5.510 | -0.179 | 2.736 | 2.915 |
| 0.592 | 0.744 | -5.579 | -0.231 | 1.850 | 2.081 |
| 0.952 | 0.975 | -5.713 | -0.023 | 1.740 | 1.763 |
| 0.015 | 0.160 | -2.923 | 1.990  | 5.567 | 3.577 |
| 0.260 | 0.457 | -5.114 | 0.342  | 2.565 | 2.223 |
| 0.227 | 0.424 | -5.024 | -0.530 | 2.171 | 2.701 |
| 0.068 | 0.234 | -4.152 | -0.905 | 3.091 | 3.996 |
| 0.118 | 0.298 | -4.565 | -0.483 | 2.494 | 2.977 |
| 0.296 | 0.493 | -5.199 | -0.361 | 2.201 | 2.562 |
| 0.599 | 0.749 | -5.584 | 0.163  | 4.495 | 4.333 |
| 0.420 | 0.606 | -5.407 | -0.378 | 2.676 | 3.054 |
| 0.973 | 0.987 | -5.714 | -0.011 | 2.729 | 2.741 |
| 0.110 | 0.289 | -4.510 | -0.592 | 2.721 | 3.313 |
| 0.138 | 0.321 | -4.676 | -0.499 | 1.919 | 2.418 |
| 0.137 | 0.320 | -4.670 | -0.592 | 1.781 | 2.373 |
| 0.483 | 0.659 | -5.482 | -0.241 | 1.708 | 1.949 |
| 0.532 | 0.696 | -5.530 | -0.217 | 5.329 | 5.547 |
| 0.786 | 0.878 | -5.680 | -0.086 | 5.057 | 5.143 |
| 0.653 | 0.789 | -5.619 | -0.130 | 2.642 | 2.772 |
| 0.430 | 0.615 | -5.420 | 0.236  | 2.224 | 1.988 |
| 0.699 | 0.821 | -5.644 | 0.107  | 2.072 | 1.965 |
| 0.565 | 0.722 | -5.558 | 0.229  | 1.766 | 1.537 |
| 0.188 | 0.380 | -4.898 | -0.346 | 2.066 | 2.412 |
| 0.142 | 0.326 | -4.697 | -0.511 | 1.296 | 1.807 |
| 0.612 | 0.757 | -5.593 | -0.220 | 4.283 | 4.503 |
| 0.077 | 0.246 | -4.240 | 0.748  | 5.201 | 4.453 |
| 0.020 | 0.167 | -3.190 | 0.746  | 7.234 | 6.488 |
| 0.029 | 0.178 | -3.485 | 1.277  | 2.579 | 1.302 |
| 0.009 | 0.157 | -2.560 | 0.725  | 7.579 | 6.854 |
| 0.878 | 0.934 | -5.704 | -0.036 | 3.870 | 3.905 |
| 0.770 | 0.868 | -5.674 | 0.156  | 3.794 | 3.638 |
| 0.780 | 0.874 | -5.678 | 0.092  | 2.820 | 2.729 |
| 0.007 | 0.157 | -2.327 | 1.524  | 8.576 | 7.052 |
| 0.002 | 0.157 | -1.351 | 1.625  | 4.583 | 2.958 |
| 0.039 | 0.193 | -3.715 | -0.708 | 2.172 | 2.880 |
| 0.334 | 0.530 | -5.273 | -0.254 | 2.779 | 3.034 |
| 0.118 | 0.298 | -4.562 | 0.355  | 4.706 | 4.351 |
| 0.112 | 0.291 | -4.527 | -0.385 | 1.703 | 2.088 |

|       |       |        |        |       |       |
|-------|-------|--------|--------|-------|-------|
| 0.209 | 0.404 | -4.969 | 0.419  | 4.068 | 3.649 |
| 0.092 | 0.267 | -4.378 | -0.477 | 3.547 | 4.024 |
| 0.067 | 0.233 | -4.141 | -0.634 | 3.066 | 3.700 |
| 0.127 | 0.308 | -4.616 | -0.549 | 2.909 | 3.458 |
| 0.251 | 0.449 | -5.093 | -0.312 | 2.173 | 2.485 |
| 0.670 | 0.801 | -5.629 | 0.131  | 2.801 | 2.670 |
| 0.077 | 0.247 | -4.247 | -0.508 | 3.865 | 4.373 |
| 0.046 | 0.203 | -3.853 | -0.662 | 3.829 | 4.491 |
| 0.097 | 0.274 | -4.421 | -0.442 | 3.761 | 4.203 |
| 0.883 | 0.936 | -5.704 | -0.047 | 3.136 | 3.183 |
| 0.483 | 0.659 | -5.481 | -0.258 | 3.480 | 3.738 |
| 0.007 | 0.157 | -2.374 | -1.198 | 2.666 | 3.863 |
| 0.883 | 0.936 | -5.704 | 0.075  | 1.560 | 1.485 |
| 0.016 | 0.162 | -2.995 | -1.598 | 4.301 | 5.899 |
| 0.133 | 0.316 | -4.650 | -0.705 | 4.474 | 5.179 |
| 0.671 | 0.802 | -5.629 | -0.102 | 2.066 | 2.168 |
| 0.382 | 0.571 | -5.353 | -0.434 | 3.277 | 3.711 |
| 0.652 | 0.788 | -5.618 | -0.168 | 3.469 | 3.637 |
| 0.780 | 0.874 | -5.678 | -0.076 | 2.746 | 2.822 |
| 0.203 | 0.398 | -4.949 | -0.544 | 1.795 | 2.339 |
| 0.754 | 0.858 | -5.668 | 0.088  | 4.082 | 3.993 |
| 0.389 | 0.576 | -5.363 | 0.325  | 4.104 | 3.779 |
| 0.164 | 0.353 | -4.802 | -0.455 | 2.301 | 2.755 |
| 0.857 | 0.923 | -5.699 | 0.060  | 4.048 | 3.989 |
| 0.531 | 0.695 | -5.529 | 0.182  | 2.743 | 2.561 |
| 0.030 | 0.178 | -3.498 | -0.636 | 2.365 | 3.002 |
| 0.086 | 0.258 | -4.324 | -0.514 | 2.430 | 2.944 |
| 0.450 | 0.631 | -5.445 | -0.195 | 3.035 | 3.230 |
| 0.372 | 0.562 | -5.338 | 0.243  | 2.874 | 2.631 |
| 0.887 | 0.938 | -5.705 | -0.048 | 2.625 | 2.673 |
| 0.911 | 0.952 | -5.709 | 0.037  | 2.484 | 2.447 |
| 0.177 | 0.368 | -4.856 | -0.666 | 3.037 | 3.702 |
| 0.940 | 0.967 | -5.712 | -0.019 | 3.191 | 3.210 |
| 0.137 | 0.320 | -4.670 | 0.368  | 6.696 | 6.327 |
| 0.271 | 0.469 | -5.142 | -0.434 | 2.129 | 2.563 |
| 0.072 | 0.239 | -4.189 | 0.945  | 3.881 | 2.937 |
| 0.005 | 0.157 | -2.036 | -1.123 | 1.684 | 2.807 |
| 0.567 | 0.723 | -5.560 | -0.151 | 7.437 | 7.588 |
| 0.151 | 0.337 | -4.741 | -0.487 | 2.786 | 3.273 |
| 0.033 | 0.184 | -3.581 | 0.647  | 2.947 | 2.300 |
| 0.368 | 0.559 | -5.331 | 0.246  | 3.029 | 2.783 |
| 0.026 | 0.175 | -3.379 | -0.980 | 3.246 | 4.226 |
| 0.273 | 0.471 | -5.147 | 0.260  | 2.608 | 2.349 |
| 0.338 | 0.533 | -5.280 | -0.243 | 3.311 | 3.554 |
| 0.159 | 0.348 | -4.781 | -0.618 | 1.313 | 1.930 |
| 0.559 | 0.718 | -5.553 | -0.163 | 2.826 | 2.989 |
| 0.002 | 0.157 | -1.245 | 1.466  | 4.304 | 2.838 |
| 0.079 | 0.249 | -4.262 | 0.540  | 2.585 | 2.045 |
| 0.063 | 0.226 | -4.086 | 0.628  | 2.570 | 1.942 |
| 0.002 | 0.157 | -1.400 | 1.338  | 4.923 | 3.585 |

|       |       |        |        |       |       |
|-------|-------|--------|--------|-------|-------|
| 0.370 | 0.560 | -5.334 | -0.291 | 2.586 | 2.878 |
| 0.619 | 0.763 | -5.597 | 0.131  | 2.385 | 2.254 |
| 0.241 | 0.438 | -5.064 | -0.442 | 4.176 | 4.618 |
| 0.058 | 0.219 | -4.025 | 0.634  | 3.403 | 2.769 |
| 0.002 | 0.157 | -1.433 | 0.952  | 3.471 | 2.519 |
| 0.354 | 0.548 | -5.308 | -0.369 | 2.677 | 3.046 |
| 0.817 | 0.896 | -5.689 | 0.069  | 2.484 | 2.415 |
| 0.183 | 0.374 | -4.878 | -0.382 | 2.741 | 3.123 |
| 0.606 | 0.754 | -5.589 | -0.141 | 2.187 | 2.328 |
| 0.143 | 0.327 | -4.702 | -0.394 | 3.896 | 4.290 |
| 0.001 | 0.157 | -0.255 | 1.559  | 4.571 | 3.012 |
| 0.965 | 0.982 | -5.714 | 0.012  | 2.750 | 2.738 |
| 0.162 | 0.351 | -4.794 | -0.394 | 2.837 | 3.232 |
| 0.502 | 0.672 | -5.502 | 0.189  | 2.544 | 2.355 |
| 0.090 | 0.265 | -4.364 | -0.596 | 2.013 | 2.608 |
| 0.360 | 0.553 | -5.319 | 0.283  | 2.520 | 2.237 |
| 0.002 | 0.157 | -1.382 | 0.866  | 3.131 | 2.265 |
| 0.490 | 0.664 | -5.489 | -0.259 | 3.805 | 4.063 |
| 0.024 | 0.173 | -3.324 | 0.860  | 3.656 | 2.796 |
| 0.085 | 0.257 | -4.319 | -0.490 | 3.138 | 3.628 |
| 0.532 | 0.695 | -5.530 | 0.168  | 4.590 | 4.422 |
| 0.537 | 0.700 | -5.535 | 0.185  | 4.320 | 4.135 |
| 0.104 | 0.281 | -4.470 | -0.940 | 2.421 | 3.361 |
| 0.489 | 0.664 | -5.489 | -0.229 | 3.993 | 4.221 |
| 0.797 | 0.886 | -5.683 | 0.059  | 4.565 | 4.506 |
| 0.949 | 0.974 | -5.713 | -0.018 | 2.851 | 2.870 |
| 0.800 | 0.888 | -5.684 | 0.076  | 2.558 | 2.482 |
| 0.073 | 0.241 | -4.203 | 1.126  | 4.982 | 3.856 |
| 0.526 | 0.691 | -5.524 | -0.185 | 2.585 | 2.770 |
| 0.607 | 0.754 | -5.590 | -0.201 | 2.294 | 2.495 |
| 0.053 | 0.213 | -3.957 | -0.714 | 3.344 | 4.058 |
| 0.967 | 0.983 | -5.714 | -0.023 | 3.004 | 3.027 |
| 0.164 | 0.353 | -4.801 | -0.400 | 2.095 | 2.495 |
| 0.080 | 0.250 | -4.270 | 0.452  | 3.126 | 2.674 |
| 0.030 | 0.180 | -3.520 | -0.861 | 1.646 | 2.507 |
| 0.913 | 0.953 | -5.709 | -0.027 | 3.566 | 3.592 |
| 0.980 | 0.989 | -5.714 | -0.009 | 4.240 | 4.249 |
| 0.016 | 0.162 | -2.985 | -0.969 | 6.519 | 7.488 |
| 0.475 | 0.653 | -5.473 | -0.195 | 4.735 | 4.930 |
| 0.266 | 0.464 | -5.130 | -0.292 | 4.171 | 4.463 |
| 0.107 | 0.286 | -4.491 | -0.653 | 2.148 | 2.801 |
| 0.001 | 0.157 | -0.436 | -1.707 | 4.627 | 6.334 |
| 0.665 | 0.797 | -5.626 | 0.116  | 2.876 | 2.760 |
| 0.520 | 0.686 | -5.518 | 0.202  | 2.983 | 2.780 |
| 0.174 | 0.364 | -4.843 | 0.446  | 4.386 | 3.940 |
| 0.023 | 0.173 | -3.300 | 0.684  | 3.541 | 2.857 |
| 0.013 | 0.160 | -2.805 | 1.004  | 3.957 | 2.953 |
| 0.393 | 0.581 | -5.369 | -0.295 | 2.589 | 2.883 |
| 0.055 | 0.216 | -3.988 | 0.732  | 2.960 | 2.227 |
| 0.280 | 0.478 | -5.164 | -0.333 | 2.340 | 2.673 |

|       |       |        |        |       |       |
|-------|-------|--------|--------|-------|-------|
| 0.157 | 0.345 | -4.771 | 0.446  | 2.779 | 2.333 |
| 0.145 | 0.329 | -4.712 | -0.381 | 3.424 | 3.805 |
| 0.005 | 0.157 | -1.995 | 1.416  | 4.885 | 3.468 |
| 0.092 | 0.267 | -4.377 | -0.807 | 3.411 | 4.218 |
| 0.047 | 0.204 | -3.862 | 0.828  | 4.214 | 3.386 |
| 0.075 | 0.244 | -4.224 | -0.568 | 3.135 | 3.703 |
| 0.062 | 0.224 | -4.074 | 0.618  | 4.003 | 3.384 |
| 0.040 | 0.194 | -3.726 | 0.609  | 4.898 | 4.288 |
| 0.419 | 0.606 | -5.405 | -0.296 | 2.398 | 2.694 |
| 0.937 | 0.966 | -5.712 | 0.025  | 2.499 | 2.474 |
| 0.143 | 0.327 | -4.703 | -1.427 | 4.509 | 5.936 |
| 0.277 | 0.475 | -5.157 | 0.329  | 2.969 | 2.640 |
| 0.778 | 0.872 | -5.677 | 0.081  | 4.104 | 4.023 |
| 0.161 | 0.349 | -4.786 | 0.557  | 2.478 | 1.922 |
| 0.109 | 0.288 | -4.506 | 0.419  | 4.917 | 4.499 |
| 0.739 | 0.848 | -5.662 | -0.121 | 3.616 | 3.736 |
| 0.032 | 0.183 | -3.571 | 0.809  | 3.051 | 2.241 |
| 0.728 | 0.841 | -5.658 | -0.113 | 3.167 | 3.280 |
| 0.095 | 0.271 | -4.405 | 0.520  | 2.727 | 2.206 |
| 0.967 | 0.983 | -5.714 | -0.012 | 5.146 | 5.157 |
| 0.237 | 0.434 | -5.055 | -0.272 | 2.178 | 2.450 |
| 0.687 | 0.812 | -5.638 | 0.120  | 3.571 | 3.450 |
| 0.451 | 0.632 | -5.446 | 0.248  | 3.304 | 3.055 |
| 0.230 | 0.428 | -5.035 | 0.308  | 4.652 | 4.343 |
| 0.360 | 0.552 | -5.318 | -0.391 | 2.276 | 2.667 |
| 0.007 | 0.157 | -2.371 | 0.944  | 3.651 | 2.707 |
| 0.020 | 0.167 | -3.175 | -0.945 | 2.261 | 3.206 |
| 0.180 | 0.371 | -4.868 | 0.391  | 4.670 | 4.279 |
| 0.158 | 0.346 | -4.775 | -0.507 | 2.437 | 2.944 |
| 0.862 | 0.926 | -5.701 | 0.056  | 4.313 | 4.257 |
| 0.059 | 0.221 | -4.039 | -0.817 | 3.587 | 4.404 |
| 0.134 | 0.317 | -4.657 | -0.486 | 2.932 | 3.418 |
| 0.472 | 0.650 | -5.470 | 0.230  | 2.670 | 2.440 |
| 0.086 | 0.259 | -4.330 | -0.506 | 4.487 | 4.993 |
| 0.106 | 0.284 | -4.482 | -0.535 | 2.534 | 3.070 |
| 0.410 | 0.597 | -5.394 | -0.231 | 2.316 | 2.547 |
| 0.021 | 0.169 | -3.237 | 1.120  | 4.918 | 3.797 |
| 0.049 | 0.207 | -3.897 | 0.669  | 2.568 | 1.899 |
| 0.127 | 0.307 | -4.615 | 0.459  | 3.633 | 3.175 |
| 0.197 | 0.392 | -4.930 | 0.315  | 4.688 | 4.373 |
| 0.041 | 0.195 | -3.748 | -0.621 | 3.350 | 3.970 |
| 0.340 | 0.535 | -5.285 | -0.413 | 3.598 | 4.011 |
| 0.668 | 0.800 | -5.628 | -0.134 | 2.468 | 2.602 |
| 0.268 | 0.466 | -5.135 | 0.298  | 3.147 | 2.849 |
| 0.416 | 0.603 | -5.402 | -0.190 | 3.292 | 3.482 |
| 0.381 | 0.570 | -5.352 | 0.227  | 3.855 | 3.628 |
| 0.446 | 0.629 | -5.440 | -0.220 | 3.171 | 3.392 |
| 0.200 | 0.395 | -4.938 | 0.599  | 2.978 | 2.379 |
| 0.214 | 0.409 | -4.984 | 0.562  | 3.968 | 3.406 |
| 0.242 | 0.439 | -5.068 | 0.592  | 5.358 | 4.766 |



|       |       |        |        |       |       |
|-------|-------|--------|--------|-------|-------|
| 0.029 | 0.178 | -3.492 | 0.687  | 3.456 | 2.768 |
| 0.184 | 0.375 | -4.881 | -0.366 | 4.238 | 4.604 |
| 0.926 | 0.960 | -5.711 | 0.026  | 2.431 | 2.405 |
| 0.508 | 0.677 | -5.508 | -0.176 | 2.418 | 2.594 |
| 0.100 | 0.277 | -4.438 | 0.531  | 2.603 | 2.072 |
| 0.644 | 0.781 | -5.613 | 0.121  | 4.370 | 4.249 |
| 0.001 | 0.157 | -0.533 | 0.883  | 2.840 | 1.957 |
| 0.006 | 0.157 | -2.133 | 0.930  | 3.650 | 2.720 |
| 0.021 | 0.168 | -3.223 | 0.985  | 3.583 | 2.599 |
| 0.110 | 0.289 | -4.513 | 0.688  | 3.411 | 2.723 |
| 0.100 | 0.277 | -4.438 | 0.520  | 3.431 | 2.911 |
| 0.805 | 0.890 | -5.686 | -0.072 | 4.104 | 4.176 |
| 0.600 | 0.749 | -5.584 | 0.162  | 4.876 | 4.714 |
| 0.972 | 0.986 | -5.714 | 0.009  | 3.063 | 3.054 |
| 0.555 | 0.715 | -5.550 | -0.398 | 2.931 | 3.329 |
| 0.031 | 0.181 | -3.534 | -0.740 | 2.651 | 3.391 |
| 0.980 | 0.989 | -5.714 | 0.010  | 4.738 | 4.728 |
| 0.217 | 0.412 | -4.996 | -0.334 | 3.122 | 3.456 |
| 0.919 | 0.957 | -5.710 | -0.050 | 1.852 | 1.902 |
| 0.163 | 0.352 | -4.796 | -0.421 | 2.433 | 2.855 |
| 0.854 | 0.921 | -5.699 | -0.046 | 2.343 | 2.389 |
| 0.879 | 0.934 | -5.704 | -0.043 | 2.486 | 2.529 |
| 0.765 | 0.865 | -5.672 | 0.075  | 2.476 | 2.402 |
| 0.007 | 0.157 | -2.307 | -0.709 | 1.642 | 2.351 |
| 0.109 | 0.288 | -4.507 | -0.697 | 4.385 | 5.082 |
| 0.117 | 0.297 | -4.556 | 0.384  | 7.454 | 7.071 |
| 0.110 | 0.289 | -4.512 | -0.870 | 2.707 | 3.576 |
| 0.146 | 0.331 | -4.720 | 0.417  | 2.571 | 2.153 |
| 0.973 | 0.987 | -5.714 | 0.011  | 3.121 | 3.111 |
| 0.248 | 0.446 | -5.085 | 0.350  | 3.248 | 2.898 |
| 0.044 | 0.201 | -3.812 | -0.619 | 2.593 | 3.212 |
| 0.378 | 0.567 | -5.347 | 0.310  | 3.812 | 3.503 |
| 0.112 | 0.290 | -4.522 | -0.368 | 2.633 | 3.001 |
| 0.009 | 0.157 | -2.557 | -0.917 | 3.098 | 4.014 |
| 0.154 | 0.341 | -4.758 | 0.336  | 4.661 | 4.326 |
| 0.605 | 0.753 | -5.588 | 0.132  | 2.185 | 2.053 |
| 0.022 | 0.171 | -3.274 | 0.653  | 3.220 | 2.567 |
| 0.033 | 0.184 | -3.591 | -0.860 | 2.064 | 2.925 |
| 0.692 | 0.816 | -5.640 | 0.114  | 2.558 | 2.444 |
| 0.925 | 0.960 | -5.711 | 0.025  | 2.822 | 2.796 |
| 0.284 | 0.481 | -5.171 | -0.436 | 2.675 | 3.110 |
| 0.560 | 0.718 | -5.554 | -0.161 | 4.668 | 4.829 |
| 0.033 | 0.184 | -3.582 | -0.629 | 4.362 | 4.990 |
| 0.500 | 0.671 | -5.500 | 0.224  | 2.793 | 2.569 |
| 0.138 | 0.322 | -4.679 | -0.412 | 2.469 | 2.881 |
| 0.659 | 0.793 | -5.623 | 0.108  | 2.246 | 2.137 |
| 0.424 | 0.610 | -5.412 | 0.199  | 3.380 | 3.180 |
| 0.900 | 0.945 | -5.707 | -0.048 | 3.930 | 3.978 |
| 0.311 | 0.508 | -5.229 | -0.463 | 3.091 | 3.554 |
| 0.152 | 0.338 | -4.745 | -0.371 | 2.229 | 2.600 |

|       |       |        |        |       |       |
|-------|-------|--------|--------|-------|-------|
| 0.049 | 0.207 | -3.901 | 0.641  | 5.480 | 4.839 |
| 0.096 | 0.273 | -4.412 | -0.576 | 2.085 | 2.661 |
| 0.149 | 0.334 | -4.731 | 0.592  | 3.263 | 2.671 |
| 0.243 | 0.440 | -5.070 | -0.553 | 2.029 | 2.582 |
| 0.058 | 0.219 | -4.024 | 0.481  | 3.501 | 3.019 |
| 0.194 | 0.388 | -4.919 | 0.383  | 2.632 | 2.249 |
| 0.862 | 0.926 | -5.700 | 0.048  | 4.394 | 4.345 |
| 0.730 | 0.843 | -5.659 | -0.087 | 2.520 | 2.607 |
| 0.075 | 0.244 | -4.226 | -0.405 | 3.437 | 3.843 |
| 0.375 | 0.565 | -5.342 | 0.235  | 6.473 | 6.238 |
| 0.061 | 0.223 | -4.062 | 0.528  | 2.812 | 2.284 |
| 0.647 | 0.784 | -5.615 | 0.167  | 2.676 | 2.509 |
| 0.394 | 0.582 | -5.371 | -0.281 | 2.062 | 2.342 |
| 0.026 | 0.175 | -3.384 | 0.643  | 3.568 | 2.925 |
| 0.593 | 0.745 | -5.579 | -0.219 | 3.626 | 3.845 |
| 0.050 | 0.207 | -3.906 | 0.888  | 5.581 | 4.693 |
| 0.002 | 0.157 | -1.404 | 1.166  | 2.751 | 1.584 |
| 0.058 | 0.219 | -4.027 | -0.784 | 1.933 | 2.716 |
| 0.098 | 0.274 | -4.424 | 0.491  | 4.703 | 4.212 |
| 0.042 | 0.196 | -3.766 | 0.586  | 4.598 | 4.012 |
| 0.030 | 0.178 | -3.495 | 0.767  | 3.669 | 2.902 |
| 0.885 | 0.937 | -5.705 | -0.042 | 2.313 | 2.355 |
| 0.029 | 0.178 | -3.470 | 0.662  | 5.103 | 4.442 |
| 0.025 | 0.175 | -3.359 | 0.758  | 4.041 | 3.283 |
| 0.512 | 0.680 | -5.511 | 0.339  | 5.540 | 5.201 |
| 0.920 | 0.957 | -5.710 | -0.031 | 2.539 | 2.570 |
| 0.139 | 0.323 | -4.683 | 0.654  | 3.065 | 2.411 |
| 0.036 | 0.188 | -3.651 | -1.213 | 4.334 | 5.547 |
| 0.164 | 0.353 | -4.803 | -0.533 | 1.658 | 2.191 |
| 0.867 | 0.928 | -5.702 | 0.049  | 3.250 | 3.201 |
| 0.188 | 0.380 | -4.898 | 0.454  | 2.577 | 2.123 |
| 0.311 | 0.508 | -5.230 | 0.323  | 3.097 | 2.774 |
| 0.551 | 0.711 | -5.546 | -0.164 | 3.605 | 3.769 |
| 0.003 | 0.157 | -1.717 | 1.003  | 3.170 | 2.167 |
| 0.446 | 0.628 | -5.440 | 0.221  | 5.652 | 5.430 |
| 0.011 | 0.157 | -2.672 | 0.794  | 3.054 | 2.261 |
| 0.360 | 0.552 | -5.318 | -0.237 | 2.253 | 2.489 |
| 0.021 | 0.168 | -3.214 | -1.716 | 2.303 | 4.019 |
| 0.129 | 0.310 | -4.629 | -0.982 | 3.162 | 4.144 |
| 0.638 | 0.777 | -5.610 | -0.156 | 2.654 | 2.810 |
| 0.619 | 0.763 | -5.598 | 0.192  | 3.694 | 3.502 |
| 0.154 | 0.341 | -4.755 | -0.349 | 3.442 | 3.791 |
| 0.012 | 0.160 | -2.783 | -0.648 | 2.590 | 3.238 |
| 0.168 | 0.357 | -4.816 | 0.388  | 3.623 | 3.235 |
| 0.004 | 0.157 | -1.939 | 0.930  | 3.002 | 2.072 |
| 0.352 | 0.547 | -5.306 | -0.263 | 3.274 | 3.537 |
| 0.309 | 0.506 | -5.225 | -0.270 | 3.382 | 3.652 |
| 0.998 | 0.999 | -5.715 | -0.001 | 3.620 | 3.621 |
| 0.003 | 0.157 | -1.528 | 1.274  | 4.435 | 3.161 |
| 0.255 | 0.452 | -5.102 | -0.294 | 2.246 | 2.540 |

|       |       |        |        |       |       |
|-------|-------|--------|--------|-------|-------|
| 0.428 | 0.613 | -5.417 | 0.255  | 4.527 | 4.271 |
| 0.009 | 0.157 | -2.507 | 1.047  | 6.525 | 5.478 |
| 0.082 | 0.253 | -4.288 | 0.724  | 4.091 | 3.367 |
| 0.344 | 0.539 | -5.291 | 0.247  | 2.674 | 2.427 |
| 0.053 | 0.212 | -3.950 | -0.573 | 1.941 | 2.514 |
| 0.082 | 0.253 | -4.287 | -0.755 | 3.572 | 4.327 |
| 0.374 | 0.565 | -5.341 | -0.405 | 2.616 | 3.021 |
| 0.097 | 0.273 | -4.416 | -0.705 | 4.902 | 5.607 |
| 0.587 | 0.740 | -5.575 | -0.164 | 2.634 | 2.798 |
| 0.320 | 0.517 | -5.247 | -0.268 | 3.757 | 4.026 |
| 0.179 | 0.370 | -4.864 | 0.452  | 3.841 | 3.390 |
| 0.884 | 0.937 | -5.705 | 0.050  | 2.483 | 2.433 |
| 0.147 | 0.332 | -4.725 | 0.634  | 4.071 | 3.437 |
| 0.420 | 0.607 | -5.408 | 0.289  | 3.227 | 2.938 |
| 0.220 | 0.416 | -5.006 | 0.504  | 2.789 | 2.285 |
| 0.172 | 0.362 | -4.836 | 0.361  | 6.109 | 5.747 |
| 0.207 | 0.402 | -4.964 | -0.334 | 2.185 | 2.519 |
| 0.050 | 0.207 | -3.903 | -0.728 | 2.584 | 3.313 |
| 0.924 | 0.959 | -5.711 | -0.025 | 2.705 | 2.730 |
| 0.243 | 0.441 | -5.072 | -0.562 | 3.130 | 3.692 |
| 0.093 | 0.269 | -4.388 | 0.484  | 2.814 | 2.330 |
| 0.660 | 0.793 | -5.623 | 0.122  | 2.483 | 2.360 |
| 0.144 | 0.328 | -4.709 | -0.408 | 2.511 | 2.919 |
| 0.042 | 0.196 | -3.767 | -0.752 | 2.520 | 3.271 |
| 0.603 | 0.752 | -5.587 | -0.142 | 3.184 | 3.326 |
| 0.362 | 0.554 | -5.322 | 0.237  | 3.324 | 3.087 |
| 0.014 | 0.160 | -2.914 | 0.560  | 3.264 | 2.704 |
| 0.289 | 0.487 | -5.183 | -0.323 | 2.908 | 3.231 |
| 0.163 | 0.352 | -4.795 | -0.469 | 4.443 | 4.912 |
| 0.259 | 0.456 | -5.113 | -0.298 | 2.023 | 2.321 |
| 0.391 | 0.579 | -5.367 | 0.239  | 6.469 | 6.231 |
| 0.417 | 0.604 | -5.403 | 0.355  | 3.078 | 2.724 |
| 0.057 | 0.218 | -4.009 | -0.688 | 2.672 | 3.360 |
| 0.204 | 0.398 | -4.952 | 0.293  | 4.264 | 3.971 |
| 0.713 | 0.829 | -5.650 | -0.103 | 4.599 | 4.702 |
| 0.216 | 0.411 | -4.993 | 0.389  | 2.790 | 2.401 |
| 0.468 | 0.647 | -5.466 | -0.194 | 5.245 | 5.439 |
| 0.050 | 0.207 | -3.904 | -0.679 | 2.730 | 3.409 |
| 0.920 | 0.957 | -5.710 | -0.038 | 2.964 | 3.001 |
| 0.725 | 0.838 | -5.656 | -0.090 | 3.403 | 3.493 |
| 0.973 | 0.987 | -5.714 | 0.012  | 2.637 | 2.624 |
| 0.177 | 0.368 | -4.856 | -0.492 | 3.868 | 4.361 |
| 0.182 | 0.373 | -4.873 | 0.370  | 2.822 | 2.452 |
| 0.685 | 0.811 | -5.637 | -0.140 | 2.091 | 2.231 |
| 0.775 | 0.871 | -5.676 | -0.084 | 2.085 | 2.169 |
| 0.039 | 0.193 | -3.719 | 0.429  | 4.187 | 3.758 |
| 0.006 | 0.157 | -2.155 | 0.886  | 3.382 | 2.497 |
| 0.139 | 0.323 | -4.683 | 0.389  | 3.621 | 3.232 |
| 0.004 | 0.157 | -1.796 | 0.971  | 3.165 | 2.194 |
| 0.060 | 0.221 | -4.048 | 0.695  | 5.332 | 4.636 |

|       |       |        |        |       |       |
|-------|-------|--------|--------|-------|-------|
| 0.039 | 0.193 | -3.720 | 0.527  | 3.203 | 2.676 |
| 0.067 | 0.232 | -4.135 | 0.556  | 3.417 | 2.861 |
| 0.116 | 0.296 | -4.548 | -0.623 | 2.381 | 3.004 |
| 0.113 | 0.292 | -4.532 | -0.619 | 2.844 | 3.463 |
| 0.108 | 0.286 | -4.496 | -0.386 | 7.772 | 8.158 |
| 0.148 | 0.333 | -4.729 | 0.472  | 3.630 | 3.158 |
| 0.611 | 0.757 | -5.592 | -0.120 | 1.789 | 1.909 |
| 0.640 | 0.778 | -5.611 | -0.122 | 3.400 | 3.523 |
| 0.798 | 0.886 | -5.684 | -0.088 | 3.310 | 3.398 |
| 0.281 | 0.479 | -5.165 | -0.360 | 1.780 | 2.140 |
| 0.611 | 0.757 | -5.592 | -0.132 | 2.427 | 2.559 |
| 0.230 | 0.427 | -5.034 | -0.277 | 3.046 | 3.323 |
| 0.423 | 0.609 | -5.410 | 0.289  | 2.928 | 2.639 |
| 0.738 | 0.848 | -5.662 | 0.093  | 6.489 | 6.396 |
| 0.079 | 0.249 | -4.263 | -0.883 | 3.480 | 4.363 |
| 0.788 | 0.880 | -5.681 | 0.076  | 3.569 | 3.493 |
| 0.950 | 0.974 | -5.713 | -0.020 | 1.415 | 1.435 |
| 0.405 | 0.593 | -5.387 | 0.320  | 3.507 | 3.187 |
| 0.072 | 0.240 | -4.196 | 0.833  | 3.604 | 2.772 |
| 0.246 | 0.443 | -5.078 | -0.362 | 2.509 | 2.871 |
| 0.944 | 0.970 | -5.712 | -0.018 | 4.362 | 4.380 |
| 0.552 | 0.712 | -5.547 | 0.160  | 2.286 | 2.125 |
| 0.766 | 0.866 | -5.673 | 0.087  | 3.140 | 3.053 |
| 0.227 | 0.424 | -5.024 | -0.360 | 2.530 | 2.889 |
| 0.213 | 0.409 | -4.984 | 0.404  | 3.234 | 2.830 |
| 0.023 | 0.173 | -3.311 | 0.853  | 2.958 | 2.105 |
| 0.016 | 0.162 | -3.007 | 0.952  | 3.346 | 2.393 |
| 0.076 | 0.245 | -4.229 | 0.667  | 3.351 | 2.683 |
| 0.009 | 0.157 | -2.517 | 1.028  | 2.882 | 1.854 |
| 0.015 | 0.160 | -2.931 | 1.603  | 6.373 | 4.770 |
| 0.239 | 0.437 | -5.061 | 0.340  | 3.916 | 3.576 |
| 0.489 | 0.664 | -5.488 | -0.263 | 4.528 | 4.791 |
| 0.386 | 0.574 | -5.360 | 0.260  | 3.612 | 3.352 |
| 0.191 | 0.383 | -4.906 | -0.520 | 3.316 | 3.836 |
| 0.018 | 0.162 | -3.079 | 1.329  | 3.711 | 2.382 |
| 0.479 | 0.656 | -5.478 | -0.194 | 2.024 | 2.218 |
| 0.632 | 0.772 | -5.606 | -0.120 | 2.554 | 2.675 |
| 0.536 | 0.699 | -5.534 | -0.251 | 2.762 | 3.013 |
| 0.195 | 0.389 | -4.923 | -0.432 | 4.102 | 4.534 |
| 0.555 | 0.715 | -5.550 | 0.171  | 2.637 | 2.465 |
| 0.117 | 0.297 | -4.555 | 0.453  | 4.091 | 3.638 |
| 0.594 | 0.745 | -5.580 | 0.226  | 5.007 | 4.782 |
| 0.040 | 0.194 | -3.728 | 0.856  | 2.945 | 2.089 |
| 0.291 | 0.489 | -5.188 | 0.358  | 3.172 | 2.813 |
| 0.237 | 0.434 | -5.054 | -0.326 | 4.739 | 5.065 |
| 0.755 | 0.858 | -5.669 | -0.097 | 3.478 | 3.575 |
| 0.189 | 0.380 | -4.899 | -0.378 | 2.453 | 2.831 |
| 0.077 | 0.247 | -4.249 | -0.451 | 6.881 | 7.332 |
| 0.041 | 0.196 | -3.764 | 0.656  | 3.622 | 2.965 |
| 0.203 | 0.398 | -4.949 | 0.360  | 2.771 | 2.411 |

|       |       |        |        |       |       |
|-------|-------|--------|--------|-------|-------|
| 0.597 | 0.747 | -5.582 | 0.158  | 2.573 | 2.415 |
| 0.147 | 0.331 | -4.723 | -0.399 | 3.119 | 3.518 |
| 0.309 | 0.506 | -5.226 | -0.295 | 2.877 | 3.172 |
| 0.121 | 0.302 | -4.583 | -0.417 | 3.145 | 3.561 |
| 0.044 | 0.200 | -3.803 | 0.598  | 2.839 | 2.241 |
| 0.769 | 0.868 | -5.674 | 0.084  | 3.659 | 3.574 |
| 0.037 | 0.189 | -3.665 | -0.601 | 3.734 | 4.335 |
| 0.690 | 0.815 | -5.640 | 0.108  | 2.889 | 2.781 |
| 0.402 | 0.589 | -5.382 | 0.232  | 7.602 | 7.371 |
| 0.695 | 0.818 | -5.642 | -0.127 | 2.803 | 2.930 |
| 0.009 | 0.157 | -2.530 | 1.139  | 3.197 | 2.058 |
| 0.008 | 0.157 | -2.453 | 1.207  | 4.801 | 3.594 |
| 0.355 | 0.549 | -5.310 | -0.266 | 6.953 | 7.219 |
| 0.129 | 0.310 | -4.628 | -0.348 | 2.144 | 2.492 |
| 0.069 | 0.235 | -4.158 | -0.575 | 3.810 | 4.385 |
| 0.076 | 0.246 | -4.238 | -0.983 | 3.862 | 4.845 |
| 0.816 | 0.896 | -5.689 | 0.072  | 3.116 | 3.044 |
| 0.730 | 0.842 | -5.658 | -0.139 | 1.410 | 1.548 |
| 0.084 | 0.256 | -4.309 | -0.468 | 3.266 | 3.734 |
| 0.217 | 0.412 | -4.995 | -0.467 | 2.782 | 3.249 |
| 0.010 | 0.157 | -2.652 | 1.229  | 5.870 | 4.641 |
| 0.771 | 0.868 | -5.675 | 0.114  | 4.170 | 4.057 |
| 0.094 | 0.271 | -4.397 | -0.487 | 7.339 | 7.826 |
| 0.426 | 0.612 | -5.415 | -0.191 | 2.498 | 2.689 |
| 0.027 | 0.177 | -3.437 | 0.682  | 2.491 | 1.809 |
| 0.492 | 0.666 | -5.491 | -0.201 | 2.406 | 2.607 |
| 0.068 | 0.234 | -4.146 | 0.520  | 3.693 | 3.174 |
| 0.204 | 0.399 | -4.954 | -0.352 | 3.121 | 3.473 |
| 0.174 | 0.363 | -4.841 | -0.359 | 2.532 | 2.891 |
| 0.975 | 0.987 | -5.714 | -0.010 | 3.037 | 3.047 |
| 0.715 | 0.831 | -5.652 | -0.106 | 2.494 | 2.601 |
| 0.418 | 0.605 | -5.404 | 0.210  | 2.870 | 2.660 |
| 0.057 | 0.218 | -4.010 | -0.577 | 1.990 | 2.567 |
| 0.030 | 0.179 | -3.506 | 0.770  | 3.495 | 2.725 |
| 0.371 | 0.562 | -5.337 | 0.302  | 3.213 | 2.911 |
| 0.509 | 0.677 | -5.508 | 0.177  | 3.631 | 3.454 |
| 0.009 | 0.157 | -2.515 | -0.767 | 2.463 | 3.230 |
| 0.477 | 0.655 | -5.476 | -0.227 | 3.132 | 3.360 |
| 0.612 | 0.757 | -5.593 | 0.185  | 3.200 | 3.015 |
| 0.079 | 0.249 | -4.262 | -0.498 | 2.732 | 3.230 |
| 0.060 | 0.221 | -4.049 | 0.591  | 4.608 | 4.016 |
| 0.519 | 0.686 | -5.518 | 0.331  | 3.167 | 2.836 |
| 0.897 | 0.943 | -5.707 | -0.036 | 4.378 | 4.413 |
| 0.067 | 0.232 | -4.138 | 0.620  | 5.726 | 5.106 |
| 0.067 | 0.231 | -4.132 | 0.919  | 7.462 | 6.543 |
| 0.841 | 0.912 | -5.696 | -0.053 | 2.421 | 2.474 |
| 0.414 | 0.601 | -5.399 | -0.158 | 9.406 | 9.564 |
| 0.653 | 0.789 | -5.619 | -0.114 | 3.379 | 3.493 |
| 0.893 | 0.942 | -5.706 | -0.033 | 2.643 | 2.676 |
| 0.558 | 0.717 | -5.553 | -0.134 | 6.790 | 6.923 |

|       |       |        |        |        |        |
|-------|-------|--------|--------|--------|--------|
| 0.169 | 0.359 | -4.823 | -0.274 | 7.962  | 8.236  |
| 0.776 | 0.871 | -5.676 | -0.090 | 3.551  | 3.641  |
| 0.409 | 0.596 | -5.392 | -0.267 | 5.782  | 6.048  |
| 0.235 | 0.432 | -5.049 | 0.407  | 5.024  | 4.617  |
| 0.050 | 0.208 | -3.915 | 0.629  | 6.220  | 5.591  |
| 0.006 | 0.157 | -2.232 | 1.200  | 4.963  | 3.762  |
| 0.100 | 0.277 | -4.442 | -0.370 | 3.222  | 3.592  |
| 0.123 | 0.304 | -4.596 | -0.344 | 3.538  | 3.882  |
| 0.027 | 0.176 | -3.430 | -0.461 | 2.465  | 2.926  |
| 0.049 | 0.207 | -3.899 | 0.552  | 5.282  | 4.730  |
| 0.093 | 0.269 | -4.386 | 0.352  | 4.953  | 4.601  |
| 0.249 | 0.447 | -5.087 | 0.305  | 3.605  | 3.300  |
| 0.008 | 0.157 | -2.395 | 0.666  | 4.237  | 3.571  |
| 0.021 | 0.168 | -3.230 | 0.970  | 3.903  | 2.933  |
| 0.582 | 0.736 | -5.571 | -0.179 | 4.828  | 5.007  |
| 0.690 | 0.815 | -5.640 | -0.111 | 3.025  | 3.136  |
| 0.053 | 0.212 | -3.949 | -0.478 | 7.375  | 7.853  |
| 0.185 | 0.376 | -4.884 | -0.442 | 2.683  | 3.125  |
| 0.361 | 0.553 | -5.320 | -0.229 | 8.977  | 9.206  |
| 0.667 | 0.798 | -5.627 | -0.095 | 10.430 | 10.525 |
| 0.433 | 0.617 | -5.424 | -0.214 | 5.051  | 5.265  |
| 0.204 | 0.399 | -4.954 | 0.320  | 3.609  | 3.289  |
| 0.153 | 0.341 | -4.753 | -0.263 | 9.914  | 10.177 |
| 0.007 | 0.157 | -2.375 | -0.574 | 7.910  | 8.484  |
| 0.047 | 0.203 | -3.855 | -0.563 | 4.060  | 4.622  |
| 0.224 | 0.421 | -5.017 | 0.447  | 5.647  | 5.200  |
| 0.026 | 0.176 | -3.391 | 0.440  | 6.766  | 6.326  |
| 0.493 | 0.667 | -5.492 | 0.179  | 4.722  | 4.543  |
| 0.630 | 0.771 | -5.605 | -0.190 | 1.994  | 2.183  |
| 0.339 | 0.534 | -5.282 | -0.269 | 1.911  | 2.181  |
| 0.780 | 0.874 | -5.678 | 0.070  | 4.428  | 4.358  |
| 0.218 | 0.413 | -4.999 | -0.433 | 2.093  | 2.526  |
| 0.326 | 0.522 | -5.259 | 0.226  | 5.649  | 5.423  |
| 0.662 | 0.795 | -5.624 | -0.106 | 6.004  | 6.110  |
| 0.024 | 0.173 | -3.323 | -0.639 | 5.877  | 6.516  |
| 0.126 | 0.306 | -4.609 | -0.349 | 4.443  | 4.792  |
| 0.021 | 0.168 | -3.205 | 0.623  | 2.961  | 2.337  |
| 0.365 | 0.557 | -5.327 | 0.229  | 6.227  | 5.998  |
| 0.111 | 0.290 | -4.516 | 0.464  | 6.429  | 5.965  |
| 0.557 | 0.716 | -5.551 | -0.270 | 2.906  | 3.176  |
| 0.488 | 0.664 | -5.487 | 0.242  | 5.031  | 4.789  |
| 0.042 | 0.198 | -3.781 | -0.494 | 3.377  | 3.871  |
| 0.752 | 0.856 | -5.667 | 0.089  | 5.089  | 5.000  |
| 0.279 | 0.477 | -5.161 | -0.786 | 2.892  | 3.678  |
| 0.178 | 0.369 | -4.860 | 0.427  | 2.954  | 2.527  |
| 0.545 | 0.706 | -5.541 | 0.143  | 5.863  | 5.720  |
| 0.562 | 0.721 | -5.556 | 0.200  | 3.786  | 3.585  |
| 0.169 | 0.359 | -4.822 | 0.325  | 5.927  | 5.602  |
| 0.823 | 0.900 | -5.691 | -0.099 | 2.557  | 2.655  |
| 0.017 | 0.162 | -3.069 | 1.161  | 5.622  | 4.461  |

|       |       |        |        |       |       |
|-------|-------|--------|--------|-------|-------|
| 0.000 | 0.157 | 0.233  | 1.550  | 4.509 | 2.959 |
| 0.238 | 0.436 | -5.058 | 0.271  | 5.730 | 5.459 |
| 0.059 | 0.220 | -4.034 | 0.529  | 7.830 | 7.301 |
| 0.004 | 0.157 | -1.930 | -1.114 | 4.914 | 6.027 |
| 0.142 | 0.326 | -4.698 | 0.550  | 2.815 | 2.265 |
| 0.029 | 0.178 | -3.491 | 0.636  | 8.447 | 7.811 |
| 0.118 | 0.298 | -4.562 | 0.609  | 5.251 | 4.642 |
| 0.104 | 0.281 | -4.468 | 0.327  | 9.695 | 9.368 |
| 0.817 | 0.896 | -5.689 | 0.052  | 4.426 | 4.374 |
| 0.207 | 0.402 | -4.964 | 0.353  | 3.785 | 3.432 |
| 0.020 | 0.167 | -3.190 | 1.258  | 6.036 | 4.778 |
| 0.249 | 0.447 | -5.088 | 0.449  | 3.113 | 2.664 |
| 0.146 | 0.330 | -4.718 | 0.529  | 2.765 | 2.237 |
| 0.402 | 0.589 | -5.382 | -0.242 | 2.733 | 2.975 |
| 0.253 | 0.451 | -5.097 | 0.325  | 3.265 | 2.940 |
| 0.057 | 0.219 | -4.019 | -0.649 | 5.180 | 5.829 |
| 0.135 | 0.319 | -4.664 | 0.383  | 6.161 | 5.778 |
| 0.026 | 0.176 | -3.389 | 0.914  | 9.058 | 8.145 |
| 0.132 | 0.315 | -4.646 | 0.531  | 5.239 | 4.708 |
| 0.304 | 0.502 | -5.215 | -0.356 | 2.056 | 2.412 |
| 0.037 | 0.189 | -3.664 | 0.608  | 5.294 | 4.686 |
| 0.547 | 0.708 | -5.543 | -0.145 | 2.376 | 2.522 |
| 0.093 | 0.268 | -4.384 | 0.430  | 4.393 | 3.963 |
| 0.111 | 0.290 | -4.519 | 0.357  | 7.363 | 7.006 |
| 0.038 | 0.192 | -3.692 | 0.557  | 6.278 | 5.722 |
| 0.160 | 0.348 | -4.781 | 0.516  | 3.987 | 3.472 |
| 0.001 | 0.157 | -0.246 | 2.521  | 5.985 | 3.463 |
| 0.001 | 0.157 | -0.901 | -0.738 | 3.767 | 4.505 |
| 0.015 | 0.160 | -2.949 | 1.285  | 7.985 | 6.701 |
| 0.165 | 0.354 | -4.804 | -0.363 | 5.953 | 6.316 |
| 0.494 | 0.667 | -5.494 | -0.161 | 3.498 | 3.659 |
| 0.174 | 0.364 | -4.843 | -0.360 | 2.313 | 2.673 |
| 0.906 | 0.950 | -5.708 | 0.039  | 3.469 | 3.430 |
| 0.493 | 0.666 | -5.492 | -0.581 | 3.634 | 4.215 |
| 0.709 | 0.827 | -5.649 | -0.102 | 4.024 | 4.126 |
| 0.124 | 0.305 | -4.602 | 0.554  | 2.442 | 1.887 |
| 0.220 | 0.416 | -5.006 | -0.248 | 4.196 | 4.444 |
| 0.707 | 0.826 | -5.648 | 0.229  | 4.828 | 4.599 |
| 0.920 | 0.957 | -5.710 | 0.066  | 4.900 | 4.835 |
| 0.019 | 0.164 | -3.142 | -0.967 | 8.669 | 9.636 |
| 0.156 | 0.344 | -4.768 | -0.396 | 3.517 | 3.914 |
| 0.018 | 0.163 | -3.095 | -0.935 | 4.354 | 5.290 |
| 0.067 | 0.232 | -4.137 | 0.395  | 7.949 | 7.554 |
| 0.302 | 0.500 | -5.211 | 0.245  | 3.854 | 3.608 |
| 0.000 | 0.157 | -0.024 | -1.015 | 5.276 | 6.291 |
| 0.053 | 0.213 | -3.957 | -0.548 | 5.537 | 6.085 |
| 0.192 | 0.385 | -4.912 | -0.411 | 3.451 | 3.862 |
| 0.048 | 0.205 | -3.875 | -0.419 | 4.630 | 5.049 |
| 0.243 | 0.441 | -5.071 | -0.340 | 2.957 | 3.297 |
| 0.134 | 0.318 | -4.658 | 0.355  | 6.460 | 6.105 |

|       |       |        |        |       |        |
|-------|-------|--------|--------|-------|--------|
| 0.751 | 0.856 | -5.667 | 0.081  | 3.310 | 3.229  |
| 0.035 | 0.186 | -3.628 | -0.586 | 4.313 | 4.899  |
| 0.183 | 0.374 | -4.877 | 0.394  | 3.580 | 3.185  |
| 0.657 | 0.792 | -5.621 | -0.100 | 3.453 | 3.553  |
| 0.399 | 0.587 | -5.379 | -0.259 | 4.354 | 4.613  |
| 0.056 | 0.217 | -3.997 | -0.481 | 7.233 | 7.714  |
| 0.078 | 0.247 | -4.249 | -0.562 | 2.684 | 3.247  |
| 0.450 | 0.631 | -5.445 | -0.215 | 2.944 | 3.159  |
| 0.922 | 0.958 | -5.710 | 0.028  | 2.848 | 2.820  |
| 0.066 | 0.230 | -4.120 | -0.478 | 7.503 | 7.981  |
| 0.095 | 0.271 | -4.402 | -0.559 | 3.250 | 3.809  |
| 0.291 | 0.489 | -5.187 | 0.305  | 7.633 | 7.328  |
| 0.027 | 0.176 | -3.411 | 0.579  | 6.703 | 6.123  |
| 0.017 | 0.162 | -3.068 | 1.123  | 8.059 | 6.936  |
| 0.406 | 0.593 | -5.388 | 0.282  | 3.345 | 3.063  |
| 0.114 | 0.292 | -4.535 | 0.608  | 5.028 | 4.420  |
| 0.157 | 0.345 | -4.772 | 0.286  | 8.082 | 7.796  |
| 0.795 | 0.885 | -5.683 | -0.077 | 4.224 | 4.301  |
| 0.054 | 0.215 | -3.973 | -1.281 | 2.998 | 4.278  |
| 0.158 | 0.346 | -4.773 | -0.390 | 5.095 | 5.485  |
| 0.005 | 0.157 | -2.121 | 0.953  | 7.229 | 6.275  |
| 0.088 | 0.262 | -4.346 | 0.384  | 8.394 | 8.010  |
| 0.011 | 0.157 | -2.673 | -0.706 | 5.173 | 5.880  |
| 0.026 | 0.176 | -3.400 | -0.590 | 3.556 | 4.146  |
| 0.044 | 0.201 | -3.817 | 0.659  | 8.902 | 8.243  |
| 0.123 | 0.304 | -4.595 | 0.500  | 7.061 | 6.561  |
| 0.522 | 0.688 | -5.521 | -0.152 | 1.721 | 1.873  |
| 0.039 | 0.192 | -3.708 | -0.606 | 7.810 | 8.417  |
| 0.866 | 0.928 | -5.701 | -0.062 | 5.854 | 5.916  |
| 0.805 | 0.890 | -5.686 | 0.097  | 2.320 | 2.223  |
| 0.133 | 0.316 | -4.651 | -0.390 | 5.148 | 5.539  |
| 0.722 | 0.836 | -5.655 | -0.148 | 3.789 | 3.937  |
| 0.431 | 0.616 | -5.421 | 0.252  | 5.090 | 4.838  |
| 0.279 | 0.477 | -5.160 | 0.314  | 5.365 | 5.051  |
| 0.735 | 0.846 | -5.661 | 0.113  | 4.514 | 4.401  |
| 0.426 | 0.611 | -5.414 | -0.249 | 5.763 | 6.012  |
| 0.592 | 0.744 | -5.579 | 0.208  | 6.659 | 6.451  |
| 0.676 | 0.805 | -5.632 | 0.259  | 7.858 | 7.599  |
| 0.432 | 0.617 | -5.423 | -0.172 | 6.957 | 7.129  |
| 0.345 | 0.540 | -5.293 | -0.255 | 7.041 | 7.296  |
| 0.563 | 0.721 | -5.556 | 0.185  | 4.108 | 3.923  |
| 0.936 | 0.965 | -5.712 | -0.023 | 2.499 | 2.522  |
| 0.021 | 0.168 | -3.221 | -0.617 | 6.895 | 7.512  |
| 0.005 | 0.157 | -2.080 | -0.950 | 9.422 | 10.372 |
| 0.487 | 0.662 | -5.486 | 0.195  | 7.007 | 6.813  |
| 0.479 | 0.656 | -5.478 | 0.293  | 5.663 | 5.369  |
| 0.082 | 0.253 | -4.291 | 0.582  | 8.810 | 8.228  |
| 0.149 | 0.335 | -4.734 | 0.389  | 5.722 | 5.332  |
| 0.242 | 0.439 | -5.068 | -0.509 | 3.119 | 3.628  |
| 0.254 | 0.451 | -5.099 | -0.619 | 4.636 | 5.255  |



|       |       |        |        |       |       |
|-------|-------|--------|--------|-------|-------|
| 0.021 | 0.168 | -3.224 | 0.585  | 3.919 | 3.333 |
| 0.288 | 0.486 | -5.181 | 0.224  | 2.749 | 2.524 |
| 0.221 | 0.418 | -5.009 | -0.452 | 2.060 | 2.513 |
| 0.027 | 0.176 | -3.416 | 1.288  | 8.420 | 7.132 |
| 0.041 | 0.195 | -3.749 | 0.747  | 7.795 | 7.048 |
| 0.011 | 0.157 | -2.703 | 1.718  | 8.433 | 6.715 |
| 0.029 | 0.178 | -3.484 | 1.078  | 7.877 | 6.800 |
| 0.515 | 0.682 | -5.514 | 0.258  | 7.003 | 6.745 |
| 0.020 | 0.167 | -3.181 | 1.435  | 7.520 | 6.086 |
| 0.068 | 0.234 | -4.149 | 0.798  | 5.647 | 4.849 |
| 0.695 | 0.818 | -5.642 | -0.198 | 3.282 | 3.479 |
| 0.030 | 0.179 | -3.499 | 1.474  | 8.715 | 7.241 |
| 0.055 | 0.216 | -3.984 | 1.393  | 7.421 | 6.027 |
| 0.498 | 0.670 | -5.497 | -0.250 | 3.494 | 3.744 |
| 0.651 | 0.787 | -5.618 | -0.125 | 3.595 | 3.720 |
| 0.137 | 0.320 | -4.672 | -0.460 | 2.501 | 2.961 |
| 0.017 | 0.162 | -3.040 | 1.456  | 5.117 | 3.660 |
| 0.354 | 0.548 | -5.308 | 0.244  | 3.243 | 2.998 |
| 0.627 | 0.769 | -5.603 | -0.152 | 2.676 | 2.828 |
| 0.146 | 0.330 | -4.717 | -0.426 | 2.995 | 3.421 |
| 0.835 | 0.908 | -5.694 | -0.086 | 2.629 | 2.714 |
| 0.063 | 0.226 | -4.091 | 0.398  | 7.028 | 6.629 |
| 0.336 | 0.532 | -5.278 | -0.409 | 7.453 | 7.862 |
| 0.300 | 0.498 | -5.208 | 0.271  | 4.919 | 4.648 |
| 0.009 | 0.157 | -2.531 | 0.743  | 4.487 | 3.744 |
| 0.722 | 0.836 | -5.655 | 0.097  | 3.619 | 3.522 |
| 0.145 | 0.329 | -4.715 | -0.529 | 3.720 | 4.249 |
| 0.928 | 0.961 | -5.711 | -0.034 | 5.154 | 5.188 |
| 0.216 | 0.411 | -4.993 | -0.445 | 4.375 | 4.820 |
| 0.347 | 0.542 | -5.296 | -0.742 | 4.199 | 4.941 |
| 0.483 | 0.659 | -5.482 | -0.230 | 4.159 | 4.389 |
| 0.157 | 0.345 | -4.769 | -0.498 | 3.503 | 4.002 |
| 0.547 | 0.709 | -5.543 | 0.149  | 5.122 | 4.973 |
| 0.001 | 0.157 | -0.993 | 0.960  | 2.722 | 1.762 |
| 0.960 | 0.979 | -5.714 | 0.018  | 5.404 | 5.386 |
| 0.011 | 0.157 | -2.682 | 0.994  | 3.756 | 2.763 |
| 0.207 | 0.402 | -4.964 | 0.347  | 3.393 | 3.046 |
| 0.145 | 0.329 | -4.715 | -0.393 | 4.481 | 4.874 |
| 0.141 | 0.326 | -4.695 | -0.331 | 4.147 | 4.478 |
| 0.034 | 0.185 | -3.611 | -0.521 | 6.148 | 6.668 |
| 0.659 | 0.793 | -5.623 | 0.187  | 3.516 | 3.329 |
| 0.273 | 0.471 | -5.147 | -0.441 | 5.909 | 6.350 |
| 0.609 | 0.756 | -5.591 | -0.180 | 2.569 | 2.749 |
| 0.009 | 0.157 | -2.541 | 0.613  | 3.773 | 3.160 |
| 0.044 | 0.201 | -3.814 | -0.565 | 2.372 | 2.937 |
| 0.507 | 0.676 | -5.507 | -0.270 | 2.309 | 2.579 |
| 0.052 | 0.211 | -3.938 | 0.435  | 7.062 | 6.627 |
| 0.030 | 0.178 | -3.495 | 0.693  | 5.279 | 4.586 |
| 0.399 | 0.586 | -5.378 | 0.404  | 3.970 | 3.567 |
| 0.095 | 0.271 | -4.401 | 0.452  | 8.650 | 8.198 |

|       |       |        |        |        |       |
|-------|-------|--------|--------|--------|-------|
| 0.090 | 0.265 | -4.363 | 0.558  | 5.482  | 4.924 |
| 0.955 | 0.977 | -5.713 | -0.049 | 2.893  | 2.942 |
| 0.474 | 0.652 | -5.472 | -0.202 | 4.600  | 4.802 |
| 0.036 | 0.189 | -3.659 | -0.804 | 4.049  | 4.853 |
| 0.003 | 0.157 | -1.621 | -1.131 | 3.891  | 5.023 |
| 0.015 | 0.161 | -2.973 | 0.685  | 5.671  | 4.986 |
| 0.058 | 0.220 | -4.029 | -0.948 | 5.605  | 6.553 |
| 0.274 | 0.472 | -5.149 | -0.412 | 2.679  | 3.091 |
| 0.283 | 0.481 | -5.171 | -0.301 | 6.082  | 6.382 |
| 0.578 | 0.733 | -5.568 | -0.173 | 4.214  | 4.388 |
| 0.066 | 0.231 | -4.129 | 0.480  | 5.263  | 4.782 |
| 0.743 | 0.851 | -5.664 | 0.097  | 3.127  | 3.030 |
| 0.214 | 0.409 | -4.986 | 0.354  | 3.481  | 3.127 |
| 0.104 | 0.282 | -4.473 | -0.395 | 3.764  | 4.158 |
| 0.065 | 0.229 | -4.108 | -0.449 | 4.517  | 4.966 |
| 0.014 | 0.160 | -2.905 | -0.905 | 4.847  | 5.752 |
| 0.383 | 0.572 | -5.355 | 0.253  | 5.385  | 5.132 |
| 0.393 | 0.581 | -5.370 | 0.236  | 3.561  | 3.325 |
| 0.065 | 0.229 | -4.114 | -0.449 | 5.993  | 6.442 |
| 0.371 | 0.561 | -5.336 | 0.254  | 4.547  | 4.293 |
| 0.008 | 0.157 | -2.429 | -0.895 | 5.280  | 6.175 |
| 0.010 | 0.157 | -2.651 | 1.039  | 6.575  | 5.536 |
| 0.041 | 0.195 | -3.756 | 0.527  | 3.100  | 2.573 |
| 0.355 | 0.549 | -5.310 | -0.200 | 7.156  | 7.356 |
| 0.303 | 0.501 | -5.214 | 0.197  | 7.429  | 7.232 |
| 0.013 | 0.160 | -2.804 | 0.516  | 5.877  | 5.360 |
| 0.261 | 0.459 | -5.118 | -0.247 | 6.417  | 6.664 |
| 0.002 | 0.157 | -1.143 | -1.263 | 3.569  | 4.833 |
| 0.174 | 0.363 | -4.841 | -0.372 | 5.492  | 5.864 |
| 0.057 | 0.218 | -4.006 | -0.703 | 5.023  | 5.726 |
| 0.048 | 0.205 | -3.883 | 0.468  | 6.551  | 6.083 |
| 0.862 | 0.926 | -5.700 | -0.046 | 2.421  | 2.468 |
| 0.023 | 0.173 | -3.311 | 0.934  | 10.479 | 9.545 |
| 0.103 | 0.280 | -4.463 | -0.500 | 6.777  | 7.278 |
| 0.114 | 0.292 | -4.535 | 0.671  | 6.318  | 5.647 |
| 0.213 | 0.408 | -4.983 | 0.278  | 5.627  | 5.349 |
| 0.764 | 0.864 | -5.672 | 0.057  | 6.551  | 6.494 |
| 0.957 | 0.978 | -5.713 | 0.011  | 5.462  | 5.451 |
| 0.230 | 0.427 | -5.034 | 0.270  | 4.842  | 4.572 |
| 0.143 | 0.327 | -4.703 | -0.618 | 2.045  | 2.663 |
| 0.327 | 0.523 | -5.261 | -0.205 | 2.788  | 2.994 |
| 0.011 | 0.159 | -2.722 | -0.741 | 6.309  | 7.051 |
| 0.262 | 0.460 | -5.121 | 0.256  | 5.170  | 4.913 |
| 0.774 | 0.870 | -5.676 | -0.126 | 2.091  | 2.216 |
| 0.262 | 0.460 | -5.120 | 0.775  | 4.375  | 3.600 |
| 0.483 | 0.659 | -5.482 | 0.236  | 2.148  | 1.911 |
| 0.816 | 0.896 | -5.689 | 0.085  | 5.171  | 5.086 |
| 0.021 | 0.168 | -3.213 | -0.559 | 4.725  | 5.284 |
| 0.494 | 0.667 | -5.494 | -0.233 | 3.215  | 3.449 |
| 0.937 | 0.966 | -5.712 | 0.021  | 5.949  | 5.928 |

|       |       |        |        |       |       |
|-------|-------|--------|--------|-------|-------|
| 0.678 | 0.807 | -5.633 | -0.136 | 3.187 | 3.323 |
| 0.232 | 0.429 | -5.041 | 0.549  | 3.039 | 2.491 |
| 0.166 | 0.356 | -4.811 | -0.994 | 2.657 | 3.651 |
| 0.071 | 0.239 | -4.186 | 1.135  | 7.775 | 6.640 |
| 0.281 | 0.478 | -5.165 | 0.297  | 5.784 | 5.487 |
| 0.458 | 0.638 | -5.454 | -0.313 | 4.556 | 4.869 |
| 0.048 | 0.206 | -3.887 | 0.635  | 9.602 | 8.967 |
| 0.047 | 0.204 | -3.865 | -0.836 | 1.830 | 2.665 |
| 0.177 | 0.368 | -4.856 | 0.360  | 3.978 | 3.619 |
| 0.007 | 0.157 | -2.354 | -0.876 | 3.176 | 4.052 |
| 0.018 | 0.163 | -3.094 | 1.439  | 6.668 | 5.230 |
| 0.386 | 0.574 | -5.359 | 0.205  | 7.273 | 7.068 |
| 0.255 | 0.452 | -5.102 | 0.364  | 4.690 | 4.326 |
| 0.021 | 0.169 | -3.240 | 0.667  | 5.242 | 4.575 |
| 0.731 | 0.843 | -5.659 | 0.077  | 5.312 | 5.236 |
| 0.277 | 0.475 | -5.157 | 0.358  | 4.688 | 4.330 |
| 0.246 | 0.443 | -5.078 | 0.405  | 7.250 | 6.845 |
| 0.099 | 0.276 | -4.433 | 0.602  | 7.667 | 7.066 |
| 0.009 | 0.157 | -2.502 | -0.591 | 5.861 | 6.452 |
| 0.135 | 0.319 | -4.662 | 0.817  | 4.247 | 3.429 |
| 0.132 | 0.315 | -4.646 | -0.527 | 3.419 | 3.946 |
| 0.059 | 0.221 | -4.042 | -0.467 | 4.228 | 4.695 |
| 0.516 | 0.683 | -5.515 | -0.326 | 4.656 | 4.983 |
| 0.569 | 0.725 | -5.561 | -0.144 | 2.167 | 2.310 |
| 0.583 | 0.736 | -5.572 | -0.279 | 2.494 | 2.773 |
| 0.131 | 0.312 | -4.637 | -0.367 | 6.325 | 6.692 |
| 0.009 | 0.157 | -2.493 | 1.021  | 4.643 | 3.623 |
| 0.111 | 0.290 | -4.521 | 0.334  | 7.181 | 6.847 |
| 0.012 | 0.160 | -2.746 | -1.012 | 5.468 | 6.480 |
| 0.088 | 0.262 | -4.347 | -0.896 | 3.313 | 4.209 |
| 0.082 | 0.253 | -4.287 | 0.544  | 4.984 | 4.440 |
| 0.452 | 0.633 | -5.448 | 0.189  | 5.014 | 4.825 |
| 0.548 | 0.709 | -5.544 | -0.148 | 3.062 | 3.210 |
| 0.465 | 0.645 | -5.463 | 0.320  | 5.517 | 5.197 |
| 0.236 | 0.433 | -5.052 | 0.432  | 5.645 | 5.213 |
| 0.084 | 0.256 | -4.312 | 0.482  | 7.233 | 6.751 |
| 0.023 | 0.173 | -3.306 | 0.722  | 8.754 | 8.032 |
| 0.507 | 0.676 | -5.506 | 0.159  | 3.005 | 2.846 |
| 0.244 | 0.442 | -5.074 | 0.348  | 3.639 | 3.291 |
| 0.251 | 0.449 | -5.093 | -0.364 | 4.485 | 4.849 |
| 0.050 | 0.208 | -3.912 | 0.632  | 9.376 | 8.743 |
| 0.077 | 0.246 | -4.241 | -0.369 | 4.522 | 4.891 |
| 0.689 | 0.814 | -5.639 | -0.110 | 2.405 | 2.515 |
| 0.594 | 0.746 | -5.580 | -0.138 | 2.819 | 2.957 |
| 0.009 | 0.157 | -2.530 | -0.689 | 3.921 | 4.610 |
| 0.031 | 0.182 | -3.544 | -0.697 | 3.388 | 4.085 |
| 0.682 | 0.809 | -5.635 | 0.144  | 3.894 | 3.749 |
| 0.919 | 0.957 | -5.710 | 0.029  | 3.094 | 3.065 |
| 0.016 | 0.162 | -2.985 | 1.395  | 8.538 | 7.143 |
| 0.145 | 0.329 | -4.712 | -0.401 | 4.909 | 5.310 |

|       |       |        |        |       |       |
|-------|-------|--------|--------|-------|-------|
| 0.023 | 0.173 | -3.291 | 0.646  | 2.816 | 2.170 |
| 0.055 | 0.216 | -3.983 | -0.482 | 2.429 | 2.910 |
| 0.019 | 0.164 | -3.144 | -1.193 | 3.900 | 5.093 |
| 0.033 | 0.184 | -3.587 | 1.194  | 6.002 | 4.808 |
| 0.225 | 0.422 | -5.019 | 0.360  | 3.116 | 2.756 |
| 0.962 | 0.981 | -5.714 | -0.011 | 2.031 | 2.043 |
| 0.046 | 0.203 | -3.852 | 0.919  | 6.707 | 5.789 |
| 0.224 | 0.421 | -5.017 | -0.330 | 4.599 | 4.929 |
| 0.630 | 0.771 | -5.605 | 0.114  | 5.481 | 5.367 |
| 0.012 | 0.159 | -2.735 | 1.360  | 8.450 | 7.090 |
| 0.014 | 0.160 | -2.876 | -1.042 | 4.674 | 5.716 |
| 0.584 | 0.737 | -5.573 | 0.165  | 3.575 | 3.411 |
| 0.038 | 0.192 | -3.691 | -0.735 | 3.016 | 3.751 |
| 0.893 | 0.941 | -5.706 | -0.036 | 2.532 | 2.567 |
| 0.155 | 0.342 | -4.759 | 0.360  | 3.545 | 3.185 |
| 0.095 | 0.271 | -4.401 | -0.882 | 5.457 | 6.339 |
| 0.430 | 0.616 | -5.421 | 0.220  | 4.953 | 4.733 |
| 0.077 | 0.246 | -4.242 | 0.723  | 5.777 | 5.055 |
| 0.043 | 0.199 | -3.789 | -0.574 | 4.529 | 5.103 |
| 0.548 | 0.709 | -5.544 | -0.148 | 3.876 | 4.024 |
| 0.000 | 0.157 | -0.011 | -1.154 | 3.959 | 5.113 |
| 0.036 | 0.188 | -3.647 | 0.552  | 3.846 | 3.293 |
| 0.681 | 0.808 | -5.634 | -0.121 | 3.421 | 3.541 |
| 0.037 | 0.190 | -3.671 | -0.806 | 4.151 | 4.957 |
| 0.454 | 0.634 | -5.449 | 0.198  | 5.849 | 5.651 |
| 0.048 | 0.204 | -3.871 | 0.905  | 4.350 | 3.444 |
| 0.319 | 0.517 | -5.245 | 0.324  | 5.147 | 4.823 |
| 0.019 | 0.165 | -3.155 | -0.577 | 5.591 | 6.168 |
| 0.296 | 0.493 | -5.198 | -0.485 | 4.402 | 4.887 |
| 0.130 | 0.311 | -4.632 | 0.404  | 2.533 | 2.129 |
| 0.963 | 0.981 | -5.714 | 0.022  | 2.784 | 2.762 |
| 0.568 | 0.724 | -5.561 | -0.253 | 2.996 | 3.249 |
| 0.027 | 0.176 | -3.413 | -0.806 | 3.255 | 4.061 |
| 0.566 | 0.722 | -5.559 | 0.283  | 3.778 | 3.495 |
| 0.333 | 0.528 | -5.271 | 0.400  | 4.910 | 4.509 |
| 0.253 | 0.451 | -5.097 | -0.462 | 3.545 | 4.007 |
| 0.053 | 0.212 | -3.951 | 0.447  | 6.728 | 6.281 |
| 0.092 | 0.267 | -4.375 | 0.443  | 7.303 | 6.860 |
| 0.026 | 0.176 | -3.404 | 0.495  | 8.378 | 7.883 |
| 0.190 | 0.383 | -4.904 | -0.393 | 3.197 | 3.590 |
| 0.005 | 0.157 | -2.101 | -0.827 | 4.719 | 5.546 |
| 0.237 | 0.434 | -5.054 | 0.244  | 4.503 | 4.258 |
| 0.180 | 0.371 | -4.868 | 0.347  | 2.532 | 2.185 |
| 0.014 | 0.160 | -2.880 | 0.582  | 5.776 | 5.195 |
| 0.085 | 0.257 | -4.317 | 0.519  | 3.348 | 2.830 |
| 0.659 | 0.793 | -5.623 | -0.118 | 2.009 | 2.127 |
| 0.147 | 0.331 | -4.721 | -0.310 | 5.818 | 6.128 |
| 0.596 | 0.747 | -5.582 | -0.189 | 4.229 | 4.418 |
| 0.022 | 0.169 | -3.245 | -0.808 | 7.022 | 7.830 |
| 0.386 | 0.574 | -5.359 | 0.481  | 4.033 | 3.551 |

|       |       |        |        |        |       |
|-------|-------|--------|--------|--------|-------|
| 0.305 | 0.503 | -5.218 | 0.252  | 6.191  | 5.939 |
| 0.582 | 0.736 | -5.571 | -0.352 | 3.525  | 3.876 |
| 0.352 | 0.546 | -5.304 | 0.262  | 3.595  | 3.333 |
| 0.582 | 0.736 | -5.572 | -0.350 | 3.549  | 3.899 |
| 0.780 | 0.874 | -5.678 | -0.071 | 5.609  | 5.680 |
| 0.084 | 0.256 | -4.309 | 1.370  | 8.028  | 6.658 |
| 0.877 | 0.933 | -5.704 | -0.045 | 3.443  | 3.488 |
| 0.064 | 0.228 | -4.103 | -0.420 | 2.981  | 3.400 |
| 0.132 | 0.315 | -4.648 | -0.636 | 4.523  | 5.159 |
| 0.047 | 0.203 | -3.858 | 1.369  | 4.441  | 3.072 |
| 0.036 | 0.189 | -3.660 | 0.870  | 5.087  | 4.217 |
| 0.065 | 0.229 | -4.110 | -1.031 | 7.920  | 8.951 |
| 0.536 | 0.699 | -5.534 | 0.175  | 6.094  | 5.919 |
| 0.167 | 0.356 | -4.812 | -0.336 | 3.171  | 3.507 |
| 0.068 | 0.234 | -4.151 | 0.450  | 4.984  | 4.534 |
| 0.098 | 0.275 | -4.426 | 0.688  | 2.745  | 2.058 |
| 0.063 | 0.227 | -4.095 | 0.618  | 5.119  | 4.500 |
| 0.386 | 0.574 | -5.360 | -0.340 | 4.441  | 4.781 |
| 0.327 | 0.523 | -5.261 | -0.267 | 4.005  | 4.272 |
| 0.908 | 0.951 | -5.709 | 0.041  | 4.623  | 4.583 |
| 0.223 | 0.419 | -5.013 | 0.352  | 5.049  | 4.697 |
| 0.051 | 0.208 | -3.919 | -0.698 | 4.722  | 5.419 |
| 0.273 | 0.471 | -5.146 | 0.284  | 6.159  | 5.875 |
| 0.867 | 0.928 | -5.701 | -0.123 | 5.908  | 6.031 |
| 0.002 | 0.157 | -1.374 | 3.036  | 10.127 | 7.092 |
| 0.078 | 0.248 | -4.254 | 0.444  | 2.883  | 2.440 |
| 0.549 | 0.710 | -5.545 | -0.272 | 2.736  | 3.008 |
| 0.147 | 0.331 | -4.723 | 0.407  | 5.742  | 5.335 |
| 0.041 | 0.195 | -3.760 | 0.729  | 6.929  | 6.200 |
| 0.020 | 0.167 | -3.199 | 0.749  | 10.331 | 9.582 |
| 0.247 | 0.445 | -5.082 | -0.442 | 3.728  | 4.170 |
| 0.063 | 0.227 | -4.095 | 0.632  | 3.636  | 3.004 |
| 0.038 | 0.192 | -3.703 | 0.671  | 2.574  | 1.903 |
| 0.038 | 0.192 | -3.695 | -0.590 | 5.168  | 5.758 |
| 0.082 | 0.253 | -4.290 | -0.535 | 3.154  | 3.689 |
| 0.716 | 0.832 | -5.652 | 0.101  | 3.117  | 3.016 |
| 0.822 | 0.899 | -5.691 | 0.074  | 3.436  | 3.363 |
| 0.126 | 0.306 | -4.609 | 0.472  | 3.318  | 2.846 |
| 0.748 | 0.853 | -5.666 | -0.096 | 2.778  | 2.874 |
| 0.640 | 0.778 | -5.611 | 0.097  | 9.759  | 9.662 |
| 0.959 | 0.979 | -5.714 | 0.017  | 5.674  | 5.657 |
| 0.050 | 0.207 | -3.904 | -0.716 | 3.382  | 4.098 |
| 0.002 | 0.157 | -1.196 | -0.857 | 4.866  | 5.722 |
| 0.022 | 0.171 | -3.262 | 0.885  | 7.544  | 6.660 |
| 0.035 | 0.186 | -3.633 | -0.851 | 4.660  | 5.511 |
| 0.099 | 0.276 | -4.432 | 0.435  | 6.153  | 5.717 |
| 0.036 | 0.188 | -3.650 | 0.517  | 3.899  | 3.382 |
| 0.348 | 0.543 | -5.298 | 0.288  | 6.779  | 6.491 |
| 0.614 | 0.759 | -5.595 | 0.182  | 4.606  | 4.424 |
| 0.002 | 0.157 | -1.413 | 1.054  | 5.646  | 4.592 |

|       |       |        |        |       |       |
|-------|-------|--------|--------|-------|-------|
| 0.047 | 0.204 | -3.870 | 0.462  | 8.393 | 7.931 |
| 0.505 | 0.674 | -5.505 | 0.143  | 7.578 | 7.435 |
| 0.025 | 0.175 | -3.363 | -0.692 | 5.356 | 6.048 |
| 0.505 | 0.674 | -5.505 | 0.274  | 4.708 | 4.434 |
| 0.249 | 0.447 | -5.087 | 0.279  | 6.257 | 5.978 |
| 0.793 | 0.884 | -5.682 | -0.075 | 5.854 | 5.929 |
| 0.083 | 0.255 | -4.300 | 0.407  | 9.004 | 8.597 |
| 0.056 | 0.217 | -3.995 | 0.570  | 6.281 | 5.711 |
| 0.326 | 0.523 | -5.259 | 0.209  | 6.519 | 6.311 |
| 0.036 | 0.189 | -3.663 | 0.414  | 6.757 | 6.343 |
| 0.070 | 0.237 | -4.172 | -0.756 | 3.651 | 4.407 |
| 0.004 | 0.157 | -1.952 | 1.110  | 4.219 | 3.109 |
| 0.003 | 0.157 | -1.581 | 1.975  | 6.207 | 4.232 |
| 0.025 | 0.175 | -3.363 | 0.791  | 4.136 | 3.345 |
| 0.043 | 0.198 | -3.784 | -0.480 | 5.226 | 5.706 |
| 0.007 | 0.157 | -2.371 | 1.271  | 4.261 | 2.990 |
| 0.087 | 0.260 | -4.339 | -0.704 | 2.305 | 3.009 |
| 0.266 | 0.464 | -5.130 | 0.263  | 5.216 | 4.953 |
| 0.254 | 0.452 | -5.101 | -0.325 | 4.066 | 4.391 |
| 0.005 | 0.157 | -2.126 | -0.838 | 4.260 | 5.099 |
| 0.416 | 0.603 | -5.402 | 0.341  | 4.869 | 4.528 |
| 0.126 | 0.306 | -4.610 | 0.579  | 6.229 | 5.650 |
| 0.014 | 0.160 | -2.913 | 1.245  | 7.621 | 6.376 |
| 0.116 | 0.296 | -4.551 | 0.811  | 5.166 | 4.355 |
| 0.026 | 0.176 | -3.406 | -0.506 | 3.789 | 4.295 |
| 0.438 | 0.622 | -5.430 | -0.269 | 3.592 | 3.860 |
| 0.005 | 0.157 | -1.971 | 1.039  | 4.605 | 3.566 |
| 0.406 | 0.594 | -5.389 | 0.199  | 5.750 | 5.551 |
| 0.121 | 0.302 | -4.582 | 0.350  | 7.813 | 7.463 |
| 0.290 | 0.488 | -5.186 | 0.266  | 6.341 | 6.074 |
| 0.010 | 0.157 | -2.630 | -1.149 | 5.875 | 7.024 |
| 0.402 | 0.589 | -5.382 | 0.366  | 5.061 | 4.695 |
| 0.046 | 0.203 | -3.838 | 0.509  | 6.389 | 5.881 |
| 0.063 | 0.226 | -4.090 | -0.534 | 4.602 | 5.136 |
| 0.375 | 0.565 | -5.342 | 0.171  | 6.867 | 6.695 |
| 0.132 | 0.315 | -4.646 | -0.422 | 4.544 | 4.966 |
| 0.056 | 0.218 | -4.004 | -0.859 | 4.567 | 5.425 |
| 0.291 | 0.489 | -5.187 | 0.335  | 5.318 | 4.983 |
| 0.000 | 0.157 | -0.095 | 1.073  | 8.418 | 7.345 |
| 0.031 | 0.180 | -3.527 | 0.673  | 5.939 | 5.265 |
| 0.996 | 0.998 | -5.715 | -0.002 | 2.872 | 2.874 |
| 0.248 | 0.446 | -5.084 | 0.299  | 5.323 | 5.024 |
| 0.084 | 0.256 | -4.307 | 0.429  | 5.915 | 5.486 |
| 0.503 | 0.672 | -5.502 | -0.220 | 2.308 | 2.529 |
| 0.198 | 0.392 | -4.931 | 0.314  | 5.417 | 5.103 |
| 0.733 | 0.844 | -5.660 | 0.084  | 8.923 | 8.839 |
| 0.199 | 0.394 | -4.936 | -0.317 | 4.414 | 4.731 |
| 0.036 | 0.189 | -3.661 | 0.682  | 4.306 | 3.625 |
| 0.443 | 0.626 | -5.436 | -0.245 | 6.343 | 6.589 |
| 0.351 | 0.546 | -5.304 | 0.384  | 3.281 | 2.896 |

|       |       |        |        |       |       |
|-------|-------|--------|--------|-------|-------|
| 0.267 | 0.465 | -5.133 | 0.246  | 4.844 | 4.598 |
| 0.302 | 0.500 | -5.211 | 0.297  | 2.982 | 2.685 |
| 0.011 | 0.157 | -2.675 | 0.869  | 6.527 | 5.658 |
| 0.004 | 0.157 | -1.932 | -0.826 | 5.260 | 6.086 |
| 0.110 | 0.288 | -4.508 | 0.393  | 6.139 | 5.746 |
| 0.403 | 0.591 | -5.384 | 0.382  | 5.629 | 5.248 |
| 0.480 | 0.656 | -5.479 | 0.182  | 3.839 | 3.657 |
| 0.768 | 0.867 | -5.674 | -0.065 | 4.449 | 4.514 |
| 0.040 | 0.194 | -3.739 | -0.679 | 3.348 | 4.027 |
| 0.057 | 0.218 | -4.011 | 0.481  | 6.463 | 5.983 |
| 0.199 | 0.393 | -4.935 | -0.320 | 3.280 | 3.599 |
| 0.003 | 0.157 | -1.605 | -1.082 | 7.917 | 9.000 |
| 0.039 | 0.193 | -3.714 | -0.592 | 7.400 | 7.992 |
| 0.171 | 0.361 | -4.831 | -0.409 | 3.470 | 3.880 |
| 0.003 | 0.157 | -1.559 | 1.241  | 5.037 | 3.796 |
| 0.074 | 0.242 | -4.215 | -0.962 | 3.894 | 4.855 |
| 0.064 | 0.228 | -4.106 | 0.656  | 5.883 | 5.227 |
| 0.077 | 0.247 | -4.247 | -0.468 | 4.339 | 4.808 |
| 0.087 | 0.260 | -4.335 | 0.864  | 3.942 | 3.078 |
| 0.122 | 0.303 | -4.588 | -0.657 | 1.704 | 2.361 |
| 0.029 | 0.178 | -3.485 | 1.590  | 8.226 | 6.635 |
| 0.108 | 0.287 | -4.501 | 0.351  | 6.284 | 5.933 |
| 0.002 | 0.157 | -1.203 | -0.723 | 2.572 | 3.296 |
| 0.213 | 0.408 | -4.982 | 0.352  | 5.586 | 5.234 |
| 0.554 | 0.715 | -5.549 | 0.199  | 8.617 | 8.418 |
| 0.946 | 0.972 | -5.713 | 0.023  | 4.010 | 3.988 |
| 0.011 | 0.157 | -2.666 | 0.604  | 6.566 | 5.962 |
| 0.254 | 0.452 | -5.101 | 0.330  | 4.719 | 4.389 |
| 0.953 | 0.976 | -5.713 | -0.015 | 3.768 | 3.783 |
| 0.892 | 0.941 | -5.706 | 0.033  | 2.423 | 2.390 |
| 0.567 | 0.723 | -5.559 | 0.175  | 2.562 | 2.387 |
| 0.004 | 0.157 | -1.808 | -1.578 | 5.037 | 6.616 |
| 0.097 | 0.274 | -4.421 | 0.564  | 2.537 | 1.974 |
| 0.627 | 0.768 | -5.603 | 0.117  | 4.110 | 3.993 |
| 0.343 | 0.538 | -5.289 | -0.863 | 1.849 | 2.712 |
| 0.574 | 0.728 | -5.565 | 0.149  | 9.036 | 8.887 |
| 0.659 | 0.793 | -5.623 | 0.195  | 6.307 | 6.112 |
| 0.799 | 0.887 | -5.684 | 0.084  | 3.501 | 3.417 |
| 0.073 | 0.241 | -4.201 | 0.975  | 7.009 | 6.033 |
| 0.007 | 0.157 | -2.362 | 1.477  | 8.470 | 6.994 |
| 0.170 | 0.361 | -4.828 | 0.588  | 3.712 | 3.124 |
| 0.102 | 0.279 | -4.455 | -1.713 | 1.559 | 3.272 |
| 0.529 | 0.694 | -5.527 | 0.245  | 5.671 | 5.426 |
| 0.013 | 0.160 | -2.856 | 1.556  | 5.973 | 4.416 |
| 0.001 | 0.157 | -0.878 | -1.356 | 4.792 | 6.148 |
| 0.380 | 0.569 | -5.350 | 0.401  | 4.673 | 4.272 |
| 0.942 | 0.969 | -5.712 | -0.018 | 7.520 | 7.538 |
| 0.429 | 0.615 | -5.419 | 0.278  | 6.469 | 6.191 |
| 0.220 | 0.415 | -5.004 | 0.626  | 5.751 | 5.125 |
| 0.499 | 0.670 | -5.498 | -0.205 | 2.318 | 2.522 |

|       |       |        |        |        |       |
|-------|-------|--------|--------|--------|-------|
| 0.917 | 0.956 | -5.710 | -0.031 | 7.563  | 7.594 |
| 0.229 | 0.426 | -5.031 | 0.324  | 4.952  | 4.628 |
| 0.231 | 0.428 | -5.038 | -0.337 | 1.762  | 2.099 |
| 0.054 | 0.215 | -3.973 | 0.758  | 4.889  | 4.131 |
| 0.012 | 0.160 | -2.792 | 0.791  | 5.987  | 5.195 |
| 0.010 | 0.157 | -2.608 | 1.421  | 7.976  | 6.556 |
| 0.206 | 0.401 | -4.960 | -0.346 | 3.578  | 3.924 |
| 0.403 | 0.591 | -5.384 | -0.190 | 4.025  | 4.215 |
| 0.191 | 0.384 | -4.909 | 0.383  | 5.671  | 5.288 |
| 0.666 | 0.798 | -5.627 | 0.131  | 2.578  | 2.447 |
| 0.338 | 0.534 | -5.281 | 0.242  | 7.407  | 7.165 |
| 0.028 | 0.178 | -3.448 | 0.729  | 3.833  | 3.104 |
| 0.032 | 0.182 | -3.556 | 0.679  | 10.072 | 9.393 |
| 0.145 | 0.329 | -4.712 | 0.634  | 6.626  | 5.992 |
| 0.260 | 0.457 | -5.114 | 0.379  | 7.240  | 6.861 |
| 0.136 | 0.319 | -4.666 | 0.595  | 5.521  | 4.926 |
| 0.054 | 0.214 | -3.968 | -0.631 | 6.194  | 6.825 |
| 0.083 | 0.255 | -4.304 | 0.510  | 7.000  | 6.490 |
| 0.040 | 0.194 | -3.735 | -0.722 | 5.557  | 6.279 |
| 0.004 | 0.157 | -1.867 | 1.076  | 6.724  | 5.649 |
| 0.541 | 0.703 | -5.538 | 0.180  | 3.848  | 3.668 |
| 0.182 | 0.373 | -4.874 | -0.402 | 4.571  | 4.973 |
| 0.008 | 0.157 | -2.423 | -0.724 | 5.619  | 6.343 |
| 0.372 | 0.562 | -5.338 | 0.312  | 4.614  | 4.302 |
| 0.001 | 0.157 | -0.585 | 1.596  | 4.340  | 2.744 |
| 0.258 | 0.455 | -5.109 | -0.466 | 1.936  | 2.402 |
| 0.065 | 0.229 | -4.110 | -0.447 | 3.526  | 3.973 |
| 0.273 | 0.471 | -5.146 | -0.281 | 1.840  | 2.121 |
| 0.952 | 0.975 | -5.713 | 0.020  | 5.863  | 5.843 |
| 0.006 | 0.157 | -2.221 | 0.990  | 6.622  | 5.631 |
| 0.145 | 0.329 | -4.715 | 0.687  | 6.711  | 6.024 |
| 0.719 | 0.834 | -5.654 | 0.133  | 3.758  | 3.625 |
| 0.204 | 0.399 | -4.952 | 0.484  | 5.992  | 5.508 |
| 0.580 | 0.735 | -5.570 | 0.164  | 7.567  | 7.403 |
| 0.045 | 0.203 | -3.835 | 0.845  | 6.720  | 5.875 |
| 0.022 | 0.171 | -3.270 | 1.245  | 5.459  | 4.214 |
| 0.022 | 0.169 | -3.243 | 0.724  | 6.475  | 5.751 |
| 0.089 | 0.264 | -4.353 | 0.595  | 5.606  | 5.011 |
| 0.001 | 0.157 | -0.507 | 1.394  | 3.847  | 2.454 |
| 0.536 | 0.698 | -5.533 | 0.516  | 3.595  | 3.079 |
| 0.054 | 0.215 | -3.968 | 0.391  | 6.408  | 6.018 |
| 0.041 | 0.195 | -3.761 | -0.611 | 7.051  | 7.662 |
| 0.039 | 0.193 | -3.717 | -0.903 | 1.601  | 2.504 |
| 0.017 | 0.162 | -3.040 | -0.788 | 5.633  | 6.421 |
| 0.825 | 0.901 | -5.692 | 0.073  | 3.339  | 3.266 |
| 0.003 | 0.157 | -1.525 | 0.617  | 7.139  | 6.522 |
| 0.323 | 0.520 | -5.253 | -0.274 | 3.537  | 3.811 |
| 0.033 | 0.184 | -3.586 | -0.532 | 3.899  | 4.431 |
| 0.506 | 0.676 | -5.506 | 0.143  | 7.752  | 7.609 |
| 0.118 | 0.298 | -4.561 | 0.837  | 6.176  | 5.340 |



|       |       |        |        |        |        |
|-------|-------|--------|--------|--------|--------|
| 0.513 | 0.680 | -5.512 | 0.221  | 2.669  | 2.449  |
| 0.054 | 0.215 | -3.969 | 0.757  | 3.486  | 2.729  |
| 0.600 | 0.749 | -5.585 | -0.150 | 3.915  | 4.065  |
| 0.018 | 0.163 | -3.109 | -1.012 | 1.922  | 2.935  |
| 0.062 | 0.225 | -4.076 | -0.787 | 2.891  | 3.678  |
| 0.331 | 0.527 | -5.268 | 0.223  | 5.355  | 5.132  |
| 0.188 | 0.380 | -4.895 | 0.452  | 4.131  | 3.680  |
| 0.214 | 0.409 | -4.985 | -0.294 | 4.115  | 4.409  |
| 0.007 | 0.157 | -2.303 | -1.043 | 4.507  | 5.550  |
| 0.047 | 0.203 | -3.858 | -0.572 | 5.514  | 6.087  |
| 0.061 | 0.224 | -4.067 | 0.565  | 4.431  | 3.866  |
| 0.009 | 0.157 | -2.490 | 0.988  | 7.799  | 6.811  |
| 0.102 | 0.279 | -4.453 | 0.381  | 5.076  | 4.694  |
| 0.825 | 0.901 | -5.692 | 0.057  | 5.019  | 4.962  |
| 0.218 | 0.413 | -5.000 | 0.334  | 2.889  | 2.555  |
| 0.279 | 0.477 | -5.160 | 0.368  | 4.603  | 4.235  |
| 0.136 | 0.319 | -4.668 | 0.429  | 5.273  | 4.844  |
| 0.039 | 0.194 | -3.725 | -0.527 | 6.870  | 7.397  |
| 0.102 | 0.280 | -4.456 | 1.032  | 11.652 | 10.620 |
| 0.008 | 0.157 | -2.433 | 0.703  | 3.005  | 2.302  |
| 0.029 | 0.178 | -3.484 | 0.470  | 4.542  | 4.072  |
| 0.035 | 0.187 | -3.634 | 0.946  | 8.792  | 7.846  |
| 0.573 | 0.728 | -5.564 | -0.230 | 4.605  | 4.835  |
| 0.563 | 0.721 | -5.557 | -0.254 | 4.121  | 4.375  |
| 0.471 | 0.650 | -5.469 | -0.413 | 4.928  | 5.341  |
| 0.428 | 0.614 | -5.418 | -0.315 | 3.940  | 4.255  |
| 0.926 | 0.960 | -5.711 | -0.033 | 3.266  | 3.299  |
| 0.065 | 0.229 | -4.114 | -1.173 | 2.281  | 3.454  |
| 0.649 | 0.785 | -5.617 | -0.105 | 3.828  | 3.933  |
| 0.217 | 0.412 | -4.995 | -0.311 | 2.464  | 2.775  |
| 0.473 | 0.652 | -5.472 | -0.331 | 1.437  | 1.768  |
| 0.004 | 0.157 | -1.824 | 0.636  | 7.608  | 6.972  |
| 0.175 | 0.364 | -4.846 | 0.373  | 3.767  | 3.395  |
| 0.027 | 0.177 | -3.437 | 1.294  | 8.503  | 7.209  |
| 0.535 | 0.698 | -5.532 | 0.271  | 6.358  | 6.087  |
| 0.416 | 0.603 | -5.401 | -0.252 | 4.072  | 4.324  |
| 0.684 | 0.811 | -5.636 | -0.098 | 3.985  | 4.082  |
| 0.624 | 0.767 | -5.601 | -0.163 | 3.780  | 3.943  |
| 0.195 | 0.389 | -4.921 | -0.345 | 3.552  | 3.897  |
| 0.039 | 0.193 | -3.717 | -0.806 | 2.562  | 3.368  |
| 0.556 | 0.716 | -5.551 | 0.307  | 5.935  | 5.629  |
| 0.812 | 0.894 | -5.688 | -0.052 | 4.044  | 4.097  |
| 0.017 | 0.162 | -3.034 | 0.697  | 8.769  | 8.072  |
| 0.307 | 0.504 | -5.221 | -0.332 | 5.428  | 5.759  |
| 0.919 | 0.957 | -5.710 | 0.032  | 8.887  | 8.855  |
| 0.089 | 0.264 | -4.354 | -0.590 | 2.940  | 3.529  |
| 0.775 | 0.871 | -5.676 | 0.127  | 4.564  | 4.437  |
| 0.307 | 0.504 | -5.220 | -0.412 | 5.388  | 5.800  |
| 0.969 | 0.984 | -5.714 | -0.013 | 6.099  | 6.113  |
| 0.820 | 0.898 | -5.690 | -0.054 | 3.669  | 3.723  |

|       |       |        |        |        |        |
|-------|-------|--------|--------|--------|--------|
| 0.098 | 0.275 | -4.429 | -0.578 | 3.524  | 4.103  |
| 0.504 | 0.673 | -5.503 | 0.136  | 6.199  | 6.063  |
| 0.509 | 0.678 | -5.509 | -0.167 | 8.518  | 8.685  |
| 0.547 | 0.709 | -5.543 | -0.177 | 8.040  | 8.217  |
| 0.923 | 0.959 | -5.710 | 0.026  | 5.034  | 5.009  |
| 0.283 | 0.481 | -5.171 | -0.280 | 3.684  | 3.964  |
| 0.484 | 0.660 | -5.483 | -0.208 | 3.357  | 3.564  |
| 0.360 | 0.553 | -5.319 | 0.431  | 2.464  | 2.033  |
| 0.336 | 0.532 | -5.277 | -0.302 | 1.844  | 2.146  |
| 0.321 | 0.518 | -5.248 | -0.390 | 7.343  | 7.733  |
| 0.309 | 0.506 | -5.225 | -0.203 | 8.720  | 8.923  |
| 0.800 | 0.888 | -5.684 | 0.128  | 3.838  | 3.709  |
| 0.795 | 0.884 | -5.683 | -0.085 | 2.911  | 2.997  |
| 0.542 | 0.704 | -5.539 | -0.205 | 2.182  | 2.387  |
| 0.048 | 0.205 | -3.882 | -0.540 | 7.231  | 7.770  |
| 0.172 | 0.361 | -4.833 | -0.476 | 3.834  | 4.310  |
| 0.331 | 0.526 | -5.267 | -0.465 | 2.313  | 2.778  |
| 0.790 | 0.881 | -5.681 | -0.137 | 7.699  | 7.836  |
| 0.085 | 0.258 | -4.322 | -0.681 | 6.575  | 7.257  |
| 0.634 | 0.774 | -5.607 | -0.186 | 6.389  | 6.575  |
| 0.006 | 0.157 | -2.166 | -0.599 | 10.007 | 10.606 |
| 0.190 | 0.383 | -4.905 | -0.241 | 10.545 | 10.787 |
| 0.029 | 0.178 | -3.485 | -0.834 | 7.749  | 8.583  |
| 0.353 | 0.548 | -5.307 | -0.232 | 4.166  | 4.398  |
| 0.870 | 0.929 | -5.702 | -0.039 | 8.341  | 8.381  |
| 0.259 | 0.456 | -5.112 | 0.231  | 6.401  | 6.170  |
| 0.092 | 0.267 | -4.377 | -0.501 | 4.782  | 5.282  |
| 0.010 | 0.157 | -2.595 | -0.776 | 3.337  | 4.113  |
| 0.102 | 0.279 | -4.454 | -0.551 | 7.748  | 8.299  |
| 0.113 | 0.292 | -4.530 | -0.391 | 5.882  | 6.272  |
| 0.543 | 0.705 | -5.540 | 0.119  | 6.492  | 6.372  |
| 0.502 | 0.672 | -5.502 | -0.191 | 3.133  | 3.324  |
| 0.351 | 0.546 | -5.304 | -0.184 | 9.245  | 9.429  |
| 0.214 | 0.409 | -4.985 | -0.419 | 2.534  | 2.953  |
| 0.479 | 0.655 | -5.477 | -0.201 | 2.630  | 2.831  |
| 0.491 | 0.665 | -5.490 | -0.335 | 2.656  | 2.991  |
| 0.739 | 0.848 | -5.662 | 0.109  | 3.632  | 3.523  |
| 0.110 | 0.288 | -4.509 | -0.352 | 4.884  | 5.236  |
| 0.917 | 0.955 | -5.710 | -0.031 | 7.297  | 7.327  |
| 0.032 | 0.182 | -3.550 | -0.531 | 4.900  | 5.432  |
| 0.937 | 0.966 | -5.712 | -0.022 | 5.650  | 5.672  |
| 0.854 | 0.921 | -5.699 | 0.072  | 6.230  | 6.158  |
| 0.937 | 0.966 | -5.712 | -0.021 | 3.072  | 3.093  |
| 0.333 | 0.529 | -5.271 | -0.470 | 5.102  | 5.572  |
| 0.182 | 0.373 | -4.873 | -0.677 | 8.238  | 8.914  |
| 0.163 | 0.352 | -4.796 | -0.316 | 7.821  | 8.136  |
| 0.092 | 0.267 | -4.379 | -0.591 | 4.766  | 5.357  |
| 0.596 | 0.747 | -5.582 | -0.126 | 3.727  | 3.852  |
| 0.108 | 0.287 | -4.497 | -0.505 | 2.598  | 3.103  |
| 0.103 | 0.280 | -4.459 | -0.489 | 6.139  | 6.629  |

|       |       |        |        |        |        |
|-------|-------|--------|--------|--------|--------|
| 0.627 | 0.769 | -5.603 | 0.129  | 5.628  | 5.499  |
| 0.955 | 0.977 | -5.713 | -0.017 | 3.516  | 3.533  |
| 0.259 | 0.457 | -5.113 | -0.401 | 5.570  | 5.971  |
| 0.895 | 0.943 | -5.707 | -0.026 | 4.867  | 4.893  |
| 0.732 | 0.843 | -5.659 | 0.070  | 5.459  | 5.389  |
| 0.125 | 0.306 | -4.608 | -0.348 | 7.524  | 7.873  |
| 0.043 | 0.200 | -3.801 | -0.811 | 8.556  | 9.367  |
| 0.956 | 0.977 | -5.713 | -0.015 | 3.066  | 3.081  |
| 0.142 | 0.326 | -4.696 | -0.454 | 5.429  | 5.883  |
| 0.113 | 0.292 | -4.530 | 0.663  | 6.976  | 6.313  |
| 0.277 | 0.475 | -5.157 | -0.291 | 5.057  | 5.348  |
| 0.186 | 0.378 | -4.890 | 0.849  | 5.579  | 4.730  |
| 0.075 | 0.245 | -4.228 | 0.864  | 4.945  | 4.081  |
| 0.240 | 0.437 | -5.062 | 0.515  | 6.374  | 5.859  |
| 0.032 | 0.183 | -3.571 | 0.743  | 2.981  | 2.237  |
| 0.073 | 0.241 | -4.200 | 1.089  | 4.731  | 3.641  |
| 0.089 | 0.264 | -4.356 | 0.754  | 4.772  | 4.018  |
| 0.299 | 0.496 | -5.205 | 0.563  | 9.048  | 8.485  |
| 0.103 | 0.280 | -4.463 | 0.738  | 2.686  | 1.948  |
| 0.058 | 0.219 | -4.021 | 1.097  | 4.359  | 3.262  |
| 0.086 | 0.258 | -4.324 | 0.739  | 9.742  | 9.003  |
| 0.071 | 0.238 | -4.176 | 1.004  | 4.001  | 2.997  |
| 0.294 | 0.491 | -5.194 | 0.428  | 5.718  | 5.289  |
| 0.114 | 0.293 | -4.537 | 0.781  | 5.921  | 5.140  |
| 0.114 | 0.293 | -4.540 | 0.960  | 5.089  | 4.129  |
| 0.117 | 0.297 | -4.556 | 0.846  | 5.108  | 4.262  |
| 0.110 | 0.289 | -4.513 | 0.960  | 4.799  | 3.838  |
| 0.747 | 0.853 | -5.666 | -0.259 | 3.697  | 3.955  |
| 0.125 | 0.306 | -4.604 | 0.794  | 6.511  | 5.717  |
| 0.065 | 0.229 | -4.117 | 0.994  | 5.787  | 4.794  |
| 0.062 | 0.224 | -4.073 | 0.967  | 3.399  | 2.432  |
| 0.106 | 0.284 | -4.483 | 1.231  | 5.352  | 4.121  |
| 0.077 | 0.246 | -4.245 | 1.059  | 5.637  | 4.579  |
| 0.580 | 0.734 | -5.570 | 0.157  | 4.541  | 4.384  |
| 0.075 | 0.244 | -4.226 | 1.115  | 7.603  | 6.488  |
| 0.121 | 0.302 | -4.584 | 0.731  | 9.618  | 8.887  |
| 0.832 | 0.906 | -5.694 | -0.106 | 3.300  | 3.405  |
| 0.379 | 0.569 | -5.348 | 0.474  | 3.778  | 3.304  |
| 0.040 | 0.194 | -3.742 | 0.843  | 2.992  | 2.149  |
| 0.305 | 0.503 | -5.217 | 0.632  | 3.099  | 2.467  |
| 0.996 | 0.998 | -5.715 | 0.003  | 3.472  | 3.469  |
| 0.150 | 0.335 | -4.736 | 0.945  | 5.796  | 4.851  |
| 0.096 | 0.271 | -4.407 | 0.518  | 11.031 | 10.513 |
| 0.084 | 0.256 | -4.308 | 0.954  | 6.208  | 5.255  |
| 0.197 | 0.391 | -4.929 | 0.528  | 4.378  | 3.849  |
| 0.093 | 0.268 | -4.385 | 0.660  | 10.481 | 9.821  |
| 0.161 | 0.350 | -4.789 | 0.508  | 10.935 | 10.427 |
| 0.191 | 0.383 | -4.906 | 0.479  | 2.967  | 2.488  |
| 0.287 | 0.485 | -5.180 | 0.459  | 8.297  | 7.837  |
| 0.232 | 0.428 | -5.039 | 0.547  | 7.813  | 7.266  |

|       |       |        |        |        |        |
|-------|-------|--------|--------|--------|--------|
| 0.022 | 0.170 | -3.252 | 1.326  | 4.327  | 3.001  |
| 0.187 | 0.380 | -4.895 | 0.804  | 8.963  | 8.159  |
| 0.170 | 0.361 | -4.828 | 0.652  | 7.298  | 6.646  |
| 0.034 | 0.185 | -3.606 | 1.199  | 6.008  | 4.809  |
| 0.054 | 0.214 | -3.968 | 1.140  | 6.019  | 4.879  |
| 0.104 | 0.281 | -4.469 | 0.525  | 11.624 | 11.099 |
| 0.068 | 0.233 | -4.144 | 0.841  | 4.981  | 4.140  |
| 0.126 | 0.306 | -4.610 | 0.605  | 2.847  | 2.242  |
| 0.076 | 0.245 | -4.235 | 0.666  | 11.147 | 10.481 |
| 0.356 | 0.550 | -5.311 | 0.534  | 4.785  | 4.251  |
| 0.096 | 0.272 | -4.410 | 0.544  | 11.468 | 10.924 |
| 0.111 | 0.290 | -4.518 | 0.527  | 11.442 | 10.915 |
| 0.110 | 0.289 | -4.510 | 0.485  | 11.378 | 10.893 |
| 0.007 | 0.157 | -2.321 | 1.177  | 3.651  | 2.474  |
| 0.494 | 0.667 | -5.493 | 0.199  | 7.940  | 7.741  |
| 0.448 | 0.630 | -5.442 | 0.194  | 9.478  | 9.285  |
| 0.035 | 0.186 | -3.623 | 0.719  | 2.708  | 1.990  |
| 0.872 | 0.930 | -5.702 | -0.041 | 7.232  | 7.273  |
| 0.198 | 0.392 | -4.931 | 0.929  | 7.016  | 6.087  |
| 0.277 | 0.475 | -5.157 | 0.348  | 5.258  | 4.909  |
| 0.105 | 0.282 | -4.474 | 0.621  | 4.787  | 4.167  |
| 0.183 | 0.374 | -4.879 | 0.470  | 6.633  | 6.163  |
| 0.046 | 0.203 | -3.852 | 0.786  | 5.671  | 4.884  |
| 0.290 | 0.488 | -5.185 | 0.369  | 7.328  | 6.959  |
| 0.084 | 0.256 | -4.307 | 0.663  | 6.736  | 6.073  |
| 0.023 | 0.172 | -3.279 | -0.449 | 7.564  | 8.012  |
| 0.033 | 0.184 | -3.577 | -0.416 | 7.775  | 8.190  |
| 0.496 | 0.668 | -5.496 | -0.165 | 5.486  | 5.652  |
| 0.111 | 0.290 | -4.520 | -0.734 | 3.555  | 4.288  |
| 0.048 | 0.205 | -3.880 | -0.591 | 2.102  | 2.693  |
| 0.368 | 0.559 | -5.331 | -0.335 | 2.560  | 2.895  |
| 0.725 | 0.838 | -5.656 | 0.104  | 2.782  | 2.678  |
| 0.681 | 0.809 | -5.635 | -0.105 | 4.655  | 4.759  |
| 0.118 | 0.298 | -4.566 | -0.410 | 3.351  | 3.761  |
| 0.157 | 0.345 | -4.770 | -0.503 | 4.621  | 5.124  |
| 0.448 | 0.630 | -5.443 | 0.202  | 6.779  | 6.577  |
| 0.218 | 0.412 | -4.997 | -0.424 | 3.884  | 4.308  |
| 0.731 | 0.843 | -5.659 | -0.131 | 4.461  | 4.591  |
| 0.155 | 0.342 | -4.761 | -0.295 | 8.490  | 8.785  |
| 0.048 | 0.204 | -3.873 | -0.619 | 6.399  | 7.018  |
| 0.986 | 0.993 | -5.715 | -0.006 | 2.574  | 2.581  |
| 0.556 | 0.716 | -5.551 | 0.237  | 4.348  | 4.111  |
| 0.605 | 0.753 | -5.588 | -0.128 | 5.408  | 5.537  |
| 0.313 | 0.511 | -5.234 | -0.278 | 1.335  | 1.613  |
| 0.038 | 0.192 | -3.703 | 0.831  | 3.054  | 2.223  |
| 0.597 | 0.747 | -5.582 | 0.138  | 4.130  | 3.992  |
| 0.069 | 0.236 | -4.165 | -0.430 | 4.243  | 4.673  |
| 0.845 | 0.914 | -5.697 | -0.064 | 3.829  | 3.893  |
| 0.121 | 0.301 | -4.579 | -0.477 | 7.435  | 7.912  |
| 0.855 | 0.922 | -5.699 | 0.041  | 5.517  | 5.476  |

|       |       |        |        |        |        |
|-------|-------|--------|--------|--------|--------|
| 0.026 | 0.176 | -3.405 | -0.425 | 8.412  | 8.837  |
| 0.033 | 0.184 | -3.591 | -0.479 | 4.977  | 5.456  |
| 0.711 | 0.828 | -5.650 | -0.108 | 4.508  | 4.616  |
| 0.742 | 0.851 | -5.664 | 0.130  | 2.083  | 1.953  |
| 0.193 | 0.386 | -4.916 | -0.320 | 3.939  | 4.259  |
| 0.890 | 0.940 | -5.706 | -0.035 | 5.373  | 5.407  |
| 0.423 | 0.609 | -5.411 | 0.226  | 3.897  | 3.671  |
| 0.061 | 0.223 | -4.066 | -0.410 | 5.994  | 6.403  |
| 0.100 | 0.277 | -4.439 | -0.383 | 8.064  | 8.447  |
| 0.736 | 0.846 | -5.661 | 0.116  | 5.247  | 5.131  |
| 0.165 | 0.354 | -4.805 | -0.443 | 4.950  | 5.394  |
| 0.716 | 0.831 | -5.652 | -0.090 | 4.716  | 4.806  |
| 0.090 | 0.264 | -4.360 | -0.492 | 2.513  | 3.004  |
| 0.779 | 0.873 | -5.678 | 0.069  | 2.745  | 2.676  |
| 0.529 | 0.694 | -5.527 | 0.166  | 10.989 | 10.823 |
| 0.696 | 0.819 | -5.643 | -0.146 | 2.253  | 2.399  |
| 0.376 | 0.566 | -5.344 | -0.224 | 8.108  | 8.332  |
| 0.277 | 0.475 | -5.157 | 0.364  | 2.299  | 1.935  |
| 0.785 | 0.878 | -5.680 | -0.082 | 2.117  | 2.199  |
| 0.176 | 0.366 | -4.852 | -0.436 | 4.172  | 4.608  |
| 0.659 | 0.793 | -5.623 | -0.126 | 3.486  | 3.612  |
| 0.510 | 0.679 | -5.509 | -0.168 | 2.159  | 2.327  |
| 0.867 | 0.928 | -5.701 | -0.037 | 7.757  | 7.794  |
| 0.214 | 0.409 | -4.985 | -0.317 | 5.701  | 6.018  |
| 0.205 | 0.401 | -4.958 | 0.432  | 3.700  | 3.269  |
| 0.035 | 0.186 | -3.621 | -0.516 | 6.807  | 7.322  |
| 0.817 | 0.896 | -5.689 | 0.065  | 4.383  | 4.318  |
| 0.018 | 0.163 | -3.113 | -0.544 | 7.343  | 7.888  |
| 0.182 | 0.373 | -4.874 | 0.415  | 2.920  | 2.505  |
| 0.087 | 0.259 | -4.332 | -0.559 | 1.370  | 1.929  |
| 0.073 | 0.241 | -4.200 | 0.911  | 7.120  | 6.209  |
| 0.220 | 0.416 | -5.004 | 0.484  | 5.760  | 5.275  |
| 0.327 | 0.523 | -5.260 | 0.261  | 10.140 | 9.879  |
| 0.345 | 0.539 | -5.292 | -0.263 | 5.999  | 6.262  |
| 0.112 | 0.290 | -4.524 | 0.470  | 6.913  | 6.443  |
| 0.017 | 0.162 | -3.075 | 1.014  | 7.240  | 6.226  |
| 0.119 | 0.299 | -4.570 | 0.577  | 7.524  | 6.946  |
| 0.023 | 0.173 | -3.297 | -0.573 | 5.502  | 6.076  |
| 0.050 | 0.207 | -3.905 | 0.830  | 5.766  | 4.936  |
| 0.507 | 0.676 | -5.506 | 0.164  | 4.428  | 4.264  |
| 0.063 | 0.226 | -4.085 | -0.535 | 4.111  | 4.646  |
| 0.382 | 0.571 | -5.353 | -0.289 | 1.857  | 2.146  |
| 0.129 | 0.310 | -4.626 | -0.505 | 3.780  | 4.285  |
| 0.024 | 0.174 | -3.344 | -0.700 | 6.573  | 7.273  |
| 0.017 | 0.162 | -3.051 | 1.063  | 4.597  | 3.534  |
| 0.563 | 0.721 | -5.557 | -0.120 | 4.637  | 4.757  |
| 0.798 | 0.886 | -5.684 | 0.075  | 6.739  | 6.664  |
| 0.924 | 0.959 | -5.710 | 0.024  | 5.935  | 5.911  |
| 0.317 | 0.515 | -5.241 | 0.208  | 6.959  | 6.751  |
| 0.019 | 0.164 | -3.131 | 1.317  | 6.478  | 5.160  |

|       |       |        |        |       |       |
|-------|-------|--------|--------|-------|-------|
| 0.071 | 0.239 | -4.187 | -0.467 | 5.395 | 5.862 |
| 0.161 | 0.350 | -4.789 | 0.327  | 6.889 | 6.562 |
| 0.429 | 0.615 | -5.419 | 0.252  | 3.917 | 3.665 |
| 0.055 | 0.215 | -3.979 | 0.574  | 4.226 | 3.653 |
| 0.127 | 0.307 | -4.616 | 0.396  | 6.762 | 6.366 |
| 0.030 | 0.180 | -3.512 | 0.669  | 3.575 | 2.906 |
| 0.056 | 0.218 | -4.004 | 0.749  | 6.263 | 5.514 |
| 0.010 | 0.157 | -2.647 | 1.183  | 6.351 | 5.168 |
| 0.070 | 0.237 | -4.173 | 0.491  | 6.194 | 5.703 |
| 0.264 | 0.462 | -5.125 | -0.439 | 2.786 | 3.225 |
| 0.006 | 0.157 | -2.178 | 1.185  | 4.493 | 3.307 |
| 0.353 | 0.548 | -5.307 | 0.346  | 5.584 | 5.239 |
| 0.006 | 0.157 | -2.209 | 1.277  | 5.141 | 3.864 |
| 0.170 | 0.360 | -4.825 | -0.371 | 2.354 | 2.724 |
| 0.079 | 0.249 | -4.265 | 0.567  | 3.495 | 2.929 |
| 0.000 | 0.157 | 0.544  | -1.363 | 4.115 | 5.478 |
| 0.123 | 0.304 | -4.593 | -0.350 | 3.820 | 4.170 |
| 0.724 | 0.838 | -5.656 | -0.117 | 2.346 | 2.463 |
| 0.016 | 0.162 | -3.020 | -0.685 | 3.617 | 4.302 |
| 0.030 | 0.180 | -3.518 | 0.536  | 5.732 | 5.196 |
| 0.004 | 0.157 | -1.924 | -1.018 | 5.054 | 6.072 |
| 0.884 | 0.937 | -5.705 | 0.033  | 7.910 | 7.876 |
| 0.214 | 0.409 | -4.987 | -0.365 | 2.409 | 2.774 |
| 0.065 | 0.229 | -4.116 | -0.398 | 6.283 | 6.681 |
| 0.798 | 0.886 | -5.684 | -0.068 | 4.270 | 4.338 |
| 0.376 | 0.566 | -5.344 | -0.287 | 4.481 | 4.768 |
| 0.933 | 0.964 | -5.711 | 0.025  | 3.855 | 3.830 |
| 0.474 | 0.652 | -5.472 | -0.305 | 1.261 | 1.566 |
| 0.129 | 0.310 | -4.627 | 0.486  | 4.030 | 3.544 |
| 0.496 | 0.668 | -5.496 | -0.259 | 2.118 | 2.376 |
| 0.606 | 0.753 | -5.589 | -0.158 | 2.493 | 2.651 |
| 0.003 | 0.157 | -1.710 | -1.033 | 5.404 | 6.437 |
| 0.018 | 0.162 | -3.077 | -0.782 | 5.303 | 6.085 |
| 0.011 | 0.157 | -2.694 | -0.758 | 2.825 | 3.582 |
| 0.554 | 0.715 | -5.549 | 0.184  | 2.205 | 2.021 |
| 0.591 | 0.743 | -5.578 | 0.240  | 3.472 | 3.232 |
| 0.809 | 0.893 | -5.687 | 0.063  | 2.975 | 2.912 |
| 0.761 | 0.863 | -5.671 | 0.088  | 2.686 | 2.598 |
| 0.464 | 0.644 | -5.461 | -0.208 | 2.340 | 2.548 |
| 0.109 | 0.288 | -4.503 | -0.504 | 4.464 | 4.967 |
| 0.376 | 0.565 | -5.343 | -0.292 | 3.674 | 3.966 |
| 0.751 | 0.856 | -5.667 | 0.096  | 3.901 | 3.805 |
| 0.144 | 0.327 | -4.706 | 0.308  | 5.278 | 4.970 |
| 0.019 | 0.164 | -3.132 | 0.676  | 5.067 | 4.391 |
| 0.763 | 0.864 | -5.672 | 0.103  | 3.719 | 3.616 |
| 0.335 | 0.531 | -5.276 | -0.318 | 2.555 | 2.872 |
| 0.582 | 0.736 | -5.571 | 0.147  | 3.611 | 3.463 |
| 0.043 | 0.200 | -3.799 | 1.125  | 6.487 | 5.362 |
| 0.138 | 0.322 | -4.679 | -0.418 | 4.624 | 5.043 |
| 0.136 | 0.319 | -4.667 | 0.275  | 9.051 | 8.776 |

|       |       |        |        |        |        |
|-------|-------|--------|--------|--------|--------|
| 0.242 | 0.439 | -5.068 | 0.309  | 5.218  | 4.908  |
| 0.045 | 0.203 | -3.834 | -0.524 | 2.032  | 2.556  |
| 0.023 | 0.173 | -3.310 | 0.727  | 6.589  | 5.863  |
| 0.168 | 0.358 | -4.817 | 0.564  | 4.725  | 4.161  |
| 0.024 | 0.173 | -3.334 | -0.963 | 2.228  | 3.191  |
| 0.431 | 0.616 | -5.421 | -0.199 | 1.826  | 2.025  |
| 0.777 | 0.872 | -5.677 | 0.064  | 7.216  | 7.152  |
| 0.165 | 0.354 | -4.805 | 0.411  | 7.011  | 6.599  |
| 0.015 | 0.160 | -2.944 | -0.659 | 6.033  | 6.692  |
| 0.154 | 0.341 | -4.755 | -0.466 | 6.523  | 6.989  |
| 0.217 | 0.412 | -4.996 | -0.487 | 10.094 | 10.581 |
| 0.271 | 0.469 | -5.143 | -0.302 | 2.693  | 2.994  |
| 0.996 | 0.998 | -5.715 | -0.002 | 4.761  | 4.762  |
| 0.359 | 0.552 | -5.317 | 0.229  | 4.951  | 4.722  |
| 0.027 | 0.177 | -3.436 | 1.116  | 5.359  | 4.244  |
| 0.812 | 0.894 | -5.688 | 0.068  | 1.807  | 1.739  |
| 0.208 | 0.403 | -4.967 | 0.409  | 4.786  | 4.377  |
| 0.441 | 0.625 | -5.433 | 0.264  | 4.612  | 4.349  |
| 0.806 | 0.891 | -5.686 | 0.066  | 5.058  | 4.992  |
| 0.025 | 0.175 | -3.360 | 0.601  | 7.520  | 6.920  |
| 0.253 | 0.451 | -5.099 | 0.243  | 6.224  | 5.981  |
| 0.314 | 0.511 | -5.235 | 0.378  | 5.264  | 4.886  |
| 0.022 | 0.171 | -3.274 | 1.014  | 6.595  | 5.581  |
| 0.054 | 0.214 | -3.964 | 0.655  | 5.892  | 5.237  |
| 0.040 | 0.194 | -3.731 | -0.651 | 6.363  | 7.013  |
| 0.874 | 0.932 | -5.703 | 0.065  | 4.350  | 4.285  |
| 0.950 | 0.974 | -5.713 | -0.015 | 5.439  | 5.454  |
| 0.009 | 0.157 | -2.530 | 1.430  | 5.423  | 3.994  |
| 0.564 | 0.721 | -5.557 | 0.203  | 3.180  | 2.977  |
| 0.171 | 0.361 | -4.830 | -0.484 | 6.392  | 6.876  |
| 0.840 | 0.911 | -5.695 | -0.080 | 4.099  | 4.179  |
| 0.524 | 0.689 | -5.522 | -0.155 | 7.311  | 7.466  |
| 0.631 | 0.772 | -5.606 | 0.161  | 2.655  | 2.493  |
| 0.025 | 0.175 | -3.371 | -0.666 | 4.038  | 4.705  |
| 0.199 | 0.394 | -4.937 | -0.350 | 5.510  | 5.860  |
| 0.009 | 0.157 | -2.578 | -0.575 | 6.704  | 7.279  |
| 0.014 | 0.160 | -2.875 | -0.840 | 6.060  | 6.900  |
| 0.938 | 0.967 | -5.712 | 0.031  | 8.222  | 8.192  |
| 0.054 | 0.215 | -3.972 | -0.584 | 1.895  | 2.479  |
| 0.024 | 0.173 | -3.337 | -0.640 | 2.963  | 3.604  |
| 0.336 | 0.532 | -5.278 | 0.199  | 7.747  | 7.548  |
| 0.076 | 0.245 | -4.235 | 0.455  | 6.032  | 5.577  |
| 0.970 | 0.985 | -5.714 | -0.007 | 7.951  | 7.958  |
| 0.024 | 0.174 | -3.341 | -0.963 | 4.386  | 5.348  |
| 0.894 | 0.942 | -5.706 | -0.029 | 2.773  | 2.802  |
| 0.034 | 0.185 | -3.615 | 0.696  | 5.001  | 4.305  |
| 0.007 | 0.157 | -2.288 | 1.526  | 6.422  | 4.896  |
| 0.069 | 0.236 | -4.164 | 0.460  | 4.167  | 3.707  |
| 0.934 | 0.964 | -5.712 | 0.021  | 5.343  | 5.322  |
| 0.132 | 0.314 | -4.643 | 0.317  | 5.103  | 4.786  |

|       |       |        |        |       |       |
|-------|-------|--------|--------|-------|-------|
| 0.077 | 0.246 | -4.240 | 0.628  | 5.633 | 5.005 |
| 0.874 | 0.932 | -5.703 | -0.041 | 2.624 | 2.665 |
| 0.069 | 0.235 | -4.158 | -0.397 | 6.512 | 6.909 |
| 0.096 | 0.271 | -4.407 | -0.383 | 4.380 | 4.763 |
| 0.342 | 0.538 | -5.288 | 0.227  | 6.075 | 5.848 |
| 0.645 | 0.782 | -5.614 | -0.132 | 4.022 | 4.153 |
| 0.734 | 0.845 | -5.660 | 0.230  | 6.838 | 6.608 |
| 0.078 | 0.249 | -4.258 | 0.735  | 4.659 | 3.924 |
| 0.020 | 0.167 | -3.184 | 1.141  | 6.283 | 5.142 |
| 0.114 | 0.293 | -4.538 | 0.542  | 2.998 | 2.456 |
| 0.045 | 0.203 | -3.832 | 0.701  | 2.883 | 2.182 |
| 0.009 | 0.157 | -2.551 | 1.121  | 6.013 | 4.892 |
| 0.017 | 0.162 | -3.057 | -1.280 | 4.748 | 6.028 |
| 0.062 | 0.225 | -4.080 | 0.464  | 4.642 | 4.178 |
| 0.443 | 0.626 | -5.436 | 0.194  | 4.270 | 4.076 |
| 0.188 | 0.380 | -4.898 | -0.400 | 2.600 | 3.000 |
| 0.073 | 0.241 | -4.207 | -0.479 | 3.548 | 4.027 |
| 0.063 | 0.226 | -4.086 | 0.605  | 4.819 | 4.214 |
| 0.267 | 0.465 | -5.132 | -0.452 | 3.186 | 3.638 |
| 0.050 | 0.208 | -3.913 | -0.563 | 5.380 | 5.943 |
| 0.008 | 0.157 | -2.480 | 1.732  | 6.003 | 4.271 |
| 0.088 | 0.261 | -4.342 | 0.397  | 7.375 | 6.978 |
| 0.047 | 0.204 | -3.870 | 1.260  | 8.302 | 7.042 |
| 0.844 | 0.914 | -5.696 | -0.057 | 4.543 | 4.599 |
| 0.030 | 0.178 | -3.497 | 1.060  | 7.097 | 6.037 |
| 0.534 | 0.697 | -5.532 | -0.197 | 3.255 | 3.452 |
| 0.765 | 0.865 | -5.672 | -0.137 | 4.503 | 4.640 |
| 0.005 | 0.157 | -2.072 | 1.347  | 5.979 | 4.631 |
| 0.040 | 0.194 | -3.726 | -0.578 | 2.548 | 3.126 |
| 0.033 | 0.184 | -3.577 | 0.599  | 5.909 | 5.310 |
| 0.006 | 0.157 | -2.167 | 0.910  | 3.951 | 3.041 |
| 0.477 | 0.654 | -5.475 | 0.157  | 4.895 | 4.738 |
| 0.684 | 0.811 | -5.636 | -0.100 | 3.653 | 3.754 |
| 0.038 | 0.192 | -3.700 | -0.514 | 5.558 | 6.072 |
| 0.161 | 0.350 | -4.788 | 0.423  | 6.570 | 6.147 |
| 0.240 | 0.438 | -5.063 | 0.326  | 3.656 | 3.330 |
| 0.131 | 0.313 | -4.640 | -0.424 | 5.151 | 5.575 |
| 0.109 | 0.288 | -4.502 | 0.433  | 7.600 | 7.168 |
| 0.040 | 0.194 | -3.734 | -0.595 | 5.421 | 6.016 |
| 0.411 | 0.598 | -5.395 | -0.174 | 8.171 | 8.345 |
| 0.014 | 0.160 | -2.875 | 1.375  | 6.095 | 4.719 |
| 0.202 | 0.398 | -4.948 | 0.332  | 4.637 | 4.305 |
| 0.017 | 0.162 | -3.032 | 0.568  | 6.916 | 6.348 |
| 0.773 | 0.869 | -5.675 | 0.180  | 3.575 | 3.395 |
| 0.711 | 0.828 | -5.650 | -0.135 | 2.642 | 2.776 |
| 0.832 | 0.906 | -5.693 | 0.053  | 2.547 | 2.494 |
| 0.016 | 0.162 | -2.986 | 1.004  | 7.026 | 6.022 |
| 0.103 | 0.280 | -4.460 | -0.664 | 3.825 | 4.488 |
| 0.012 | 0.160 | -2.781 | 0.926  | 3.061 | 2.134 |
| 0.463 | 0.643 | -5.460 | -0.308 | 4.558 | 4.865 |



|       |       |        |        |        |       |
|-------|-------|--------|--------|--------|-------|
| 0.110 | 0.289 | -4.512 | 0.362  | 4.083  | 3.721 |
| 0.327 | 0.523 | -5.261 | -0.278 | 4.363  | 4.641 |
| 0.063 | 0.226 | -4.090 | 0.428  | 5.098  | 4.671 |
| 0.002 | 0.157 | -1.195 | -1.447 | 4.054  | 5.500 |
| 0.164 | 0.353 | -4.801 | -0.407 | 3.902  | 4.309 |
| 0.059 | 0.221 | -4.044 | 1.236  | 10.403 | 9.167 |
| 0.025 | 0.175 | -3.376 | 0.685  | 7.212  | 6.527 |
| 0.786 | 0.878 | -5.680 | 0.099  | 6.440  | 6.341 |
| 0.747 | 0.853 | -5.665 | 0.067  | 8.346  | 8.278 |
| 0.472 | 0.650 | -5.469 | 0.177  | 5.013  | 4.836 |
| 0.006 | 0.157 | -2.168 | -1.248 | 2.006  | 3.253 |
| 0.042 | 0.198 | -3.782 | 0.733  | 6.038  | 5.305 |
| 0.364 | 0.556 | -5.326 | 0.182  | 6.611  | 6.429 |
| 0.087 | 0.260 | -4.338 | 0.321  | 3.383  | 3.063 |
| 0.006 | 0.157 | -2.154 | 0.903  | 6.684  | 5.781 |
| 0.027 | 0.176 | -3.429 | 0.515  | 4.074  | 3.560 |
| 0.111 | 0.290 | -4.518 | 0.535  | 5.241  | 4.707 |
| 0.054 | 0.215 | -3.969 | 0.795  | 7.974  | 7.179 |
| 0.812 | 0.894 | -5.688 | 0.058  | 2.773  | 2.715 |
| 0.003 | 0.157 | -1.512 | 1.075  | 5.741  | 4.666 |
| 0.090 | 0.265 | -4.365 | 1.065  | 9.410  | 8.345 |
| 0.173 | 0.363 | -4.839 | -0.289 | 5.349  | 5.639 |
| 0.269 | 0.468 | -5.138 | -0.244 | 5.239  | 5.483 |
| 0.021 | 0.169 | -3.235 | 0.923  | 10.910 | 9.987 |
| 0.327 | 0.523 | -5.260 | -0.324 | 3.193  | 3.518 |
| 0.041 | 0.195 | -3.752 | -0.526 | 6.604  | 7.131 |
| 0.014 | 0.160 | -2.920 | 0.827  | 7.760  | 6.933 |
| 0.027 | 0.176 | -3.418 | 0.568  | 3.173  | 2.605 |
| 0.004 | 0.157 | -1.889 | 1.249  | 8.604  | 7.355 |
| 0.915 | 0.954 | -5.709 | -0.022 | 5.225  | 5.247 |
| 0.038 | 0.192 | -3.694 | 1.155  | 5.013  | 3.858 |
| 0.336 | 0.532 | -5.277 | -0.270 | 5.574  | 5.844 |
| 0.103 | 0.280 | -4.461 | 0.336  | 7.457  | 7.121 |
| 0.787 | 0.879 | -5.680 | 0.063  | 5.434  | 5.371 |
| 0.152 | 0.339 | -4.749 | 0.324  | 6.032  | 5.708 |
| 0.111 | 0.290 | -4.521 | 0.446  | 4.491  | 4.045 |
| 0.908 | 0.950 | -5.708 | -0.034 | 2.488  | 2.522 |
| 0.049 | 0.207 | -3.897 | 0.533  | 2.464  | 1.930 |
| 0.758 | 0.860 | -5.670 | -0.085 | 4.890  | 4.975 |
| 0.048 | 0.205 | -3.874 | 1.299  | 7.722  | 6.423 |
| 0.628 | 0.770 | -5.604 | -0.157 | 5.655  | 5.812 |
| 0.034 | 0.185 | -3.611 | -0.663 | 5.788  | 6.450 |
| 0.487 | 0.662 | -5.486 | -0.193 | 3.023  | 3.216 |
| 0.234 | 0.430 | -5.045 | 0.236  | 6.432  | 6.196 |
| 0.174 | 0.364 | -4.844 | 0.447  | 5.788  | 5.341 |
| 0.082 | 0.253 | -4.291 | -0.830 | 3.462  | 4.292 |
| 0.154 | 0.341 | -4.755 | -0.481 | 2.936  | 3.417 |
| 0.073 | 0.241 | -4.200 | 0.853  | 6.063  | 5.210 |
| 0.018 | 0.163 | -3.102 | 0.632  | 5.235  | 4.603 |
| 0.248 | 0.446 | -5.084 | 0.290  | 3.605  | 3.315 |

|       |       |        |        |       |       |
|-------|-------|--------|--------|-------|-------|
| 0.066 | 0.231 | -4.127 | 0.848  | 8.903 | 8.055 |
| 0.012 | 0.160 | -2.781 | 1.668  | 9.480 | 7.811 |
| 0.610 | 0.757 | -5.592 | 0.366  | 6.241 | 5.876 |
| 0.603 | 0.752 | -5.587 | -0.156 | 3.773 | 3.929 |
| 0.250 | 0.448 | -5.090 | -0.296 | 4.042 | 4.339 |
| 0.019 | 0.164 | -3.131 | 1.252  | 7.084 | 5.832 |
| 0.145 | 0.329 | -4.713 | 0.660  | 5.704 | 5.044 |
| 0.050 | 0.208 | -3.918 | 0.679  | 3.865 | 3.185 |
| 0.174 | 0.364 | -4.843 | -0.316 | 2.997 | 3.313 |
| 0.087 | 0.260 | -4.337 | 0.511  | 4.732 | 4.221 |
| 0.011 | 0.157 | -2.681 | -0.898 | 2.975 | 3.873 |
| 0.042 | 0.196 | -3.766 | 1.326  | 9.283 | 7.957 |
| 0.047 | 0.204 | -3.867 | 1.443  | 9.022 | 7.579 |
| 0.087 | 0.259 | -4.333 | 0.773  | 5.612 | 4.839 |
| 0.250 | 0.447 | -5.088 | -0.337 | 2.531 | 2.869 |
| 0.041 | 0.195 | -3.754 | 0.632  | 7.486 | 6.854 |
| 0.013 | 0.160 | -2.807 | -0.805 | 3.356 | 4.160 |
| 0.023 | 0.173 | -3.309 | 0.721  | 6.505 | 5.784 |
| 0.029 | 0.178 | -3.470 | 0.690  | 6.478 | 5.788 |
| 0.006 | 0.157 | -2.204 | 0.683  | 5.737 | 5.054 |
| 0.023 | 0.172 | -3.281 | -0.840 | 5.836 | 6.676 |
| 0.064 | 0.229 | -4.108 | 0.923  | 6.411 | 5.488 |
| 0.011 | 0.157 | -2.673 | 0.774  | 8.500 | 7.726 |
| 0.021 | 0.167 | -3.203 | -0.948 | 6.375 | 7.323 |
| 0.037 | 0.190 | -3.670 | -0.747 | 1.970 | 2.717 |
| 0.312 | 0.509 | -5.231 | 0.346  | 5.084 | 4.738 |
| 0.907 | 0.950 | -5.708 | -0.028 | 5.989 | 6.017 |
| 0.003 | 0.157 | -1.756 | 1.285  | 3.928 | 2.643 |
| 0.123 | 0.304 | -4.594 | 0.526  | 6.494 | 5.968 |
| 0.007 | 0.157 | -2.375 | 0.878  | 6.278 | 5.401 |
| 0.011 | 0.159 | -2.733 | -0.886 | 5.959 | 6.845 |
| 0.008 | 0.157 | -2.474 | 1.562  | 7.092 | 5.530 |
| 0.205 | 0.400 | -4.957 | 0.489  | 4.930 | 4.441 |
| 0.039 | 0.192 | -3.709 | 0.562  | 3.431 | 2.869 |
| 0.021 | 0.169 | -3.236 | 1.188  | 6.164 | 4.976 |
| 0.083 | 0.255 | -4.304 | 0.461  | 6.294 | 5.833 |
| 0.011 | 0.157 | -2.667 | 1.392  | 6.379 | 4.987 |
| 0.114 | 0.293 | -4.537 | 0.456  | 6.796 | 6.339 |
| 0.283 | 0.481 | -5.170 | 0.900  | 6.903 | 6.003 |
| 0.155 | 0.343 | -4.762 | 0.573  | 5.085 | 4.512 |
| 0.063 | 0.226 | -4.085 | 1.518  | 9.398 | 7.880 |
| 0.026 | 0.176 | -3.391 | 1.002  | 7.118 | 6.116 |
| 0.531 | 0.695 | -5.529 | 0.191  | 3.237 | 3.045 |
| 0.003 | 0.157 | -1.677 | 1.730  | 6.159 | 4.428 |
| 0.029 | 0.178 | -3.480 | 0.529  | 5.879 | 5.350 |
| 0.824 | 0.900 | -5.691 | -0.090 | 3.733 | 3.823 |
| 0.040 | 0.194 | -3.733 | -0.730 | 3.491 | 4.221 |
| 0.368 | 0.559 | -5.331 | 0.496  | 4.600 | 4.104 |
| 0.750 | 0.855 | -5.667 | -0.094 | 3.084 | 3.178 |
| 0.511 | 0.679 | -5.510 | 0.188  | 4.100 | 3.913 |

|       |       |        |        |       |       |
|-------|-------|--------|--------|-------|-------|
| 0.558 | 0.717 | -5.552 | 0.317  | 3.451 | 3.134 |
| 0.175 | 0.364 | -4.846 | 0.664  | 3.898 | 3.233 |
| 0.152 | 0.338 | -4.745 | 0.364  | 4.632 | 4.268 |
| 0.710 | 0.828 | -5.649 | 0.098  | 3.966 | 3.867 |
| 0.510 | 0.679 | -5.509 | -0.197 | 3.064 | 3.261 |
| 0.014 | 0.160 | -2.906 | -0.868 | 2.545 | 3.413 |
| 0.170 | 0.361 | -4.828 | 0.302  | 5.276 | 4.973 |
| 0.053 | 0.212 | -3.949 | 0.476  | 6.634 | 6.158 |
| 0.019 | 0.165 | -3.155 | 0.615  | 5.993 | 5.378 |
| 0.437 | 0.621 | -5.429 | 0.171  | 4.958 | 4.787 |
| 0.370 | 0.560 | -5.334 | -0.348 | 2.712 | 3.060 |
| 0.981 | 0.990 | -5.715 | 0.008  | 4.521 | 4.513 |
| 0.234 | 0.430 | -5.045 | -0.322 | 2.146 | 2.468 |
| 0.040 | 0.194 | -3.726 | 0.913  | 8.048 | 7.135 |
| 0.002 | 0.157 | -1.239 | -0.822 | 2.135 | 2.957 |
| 0.028 | 0.178 | -3.452 | -0.539 | 4.530 | 5.069 |
| 0.013 | 0.160 | -2.823 | -0.878 | 5.360 | 6.239 |
| 0.315 | 0.513 | -5.237 | 0.205  | 7.945 | 7.740 |
| 0.571 | 0.726 | -5.563 | 0.134  | 4.298 | 4.164 |
| 0.677 | 0.806 | -5.632 | 0.097  | 4.474 | 4.377 |
| 0.082 | 0.254 | -4.294 | -0.397 | 3.149 | 3.545 |
| 0.160 | 0.349 | -4.785 | 0.465  | 5.352 | 4.888 |
| 0.270 | 0.468 | -5.140 | 0.329  | 3.229 | 2.900 |
| 0.333 | 0.528 | -5.271 | -0.338 | 3.364 | 3.703 |
| 0.373 | 0.564 | -5.340 | -0.388 | 4.269 | 4.657 |
| 0.595 | 0.746 | -5.581 | -0.158 | 2.651 | 2.809 |
| 0.498 | 0.669 | -5.497 | -0.257 | 2.808 | 3.065 |
| 0.498 | 0.670 | -5.498 | -0.185 | 4.935 | 5.120 |
| 0.434 | 0.618 | -5.425 | -0.281 | 3.607 | 3.888 |
| 0.367 | 0.558 | -5.331 | -0.286 | 4.261 | 4.548 |
| 0.016 | 0.162 | -3.016 | -0.920 | 5.371 | 6.291 |
| 0.204 | 0.399 | -4.952 | -0.403 | 5.020 | 5.423 |
| 0.890 | 0.940 | -5.706 | 0.032  | 5.881 | 5.849 |
| 0.026 | 0.175 | -3.378 | 0.840  | 6.581 | 5.741 |
| 0.885 | 0.937 | -5.705 | 0.038  | 4.345 | 4.308 |
| 0.066 | 0.230 | -4.120 | 0.748  | 6.432 | 5.684 |
| 0.622 | 0.765 | -5.600 | 0.148  | 5.589 | 5.441 |
| 0.013 | 0.160 | -2.841 | 0.766  | 6.783 | 6.016 |
| 0.100 | 0.277 | -4.439 | 0.456  | 5.115 | 4.660 |
| 0.142 | 0.327 | -4.700 | 0.390  | 5.492 | 5.103 |
| 0.006 | 0.157 | -2.264 | 1.967  | 5.854 | 3.887 |
| 0.007 | 0.157 | -2.268 | 0.565  | 6.022 | 5.457 |
| 0.218 | 0.413 | -4.998 | -0.344 | 2.446 | 2.789 |
| 0.005 | 0.157 | -2.027 | 0.884  | 3.745 | 2.861 |
| 0.368 | 0.559 | -5.331 | 0.250  | 3.713 | 3.463 |
| 0.156 | 0.344 | -4.768 | -0.452 | 2.725 | 3.177 |
| 0.128 | 0.309 | -4.623 | 0.801  | 5.533 | 4.732 |
| 0.749 | 0.855 | -5.666 | 0.077  | 3.414 | 3.337 |
| 0.032 | 0.182 | -3.561 | 0.597  | 5.938 | 5.341 |
| 0.259 | 0.456 | -5.112 | -0.283 | 3.851 | 4.135 |

|       |       |        |        |       |       |
|-------|-------|--------|--------|-------|-------|
| 0.562 | 0.721 | -5.556 | -0.177 | 3.401 | 3.577 |
| 0.055 | 0.216 | -3.982 | -0.427 | 2.149 | 2.577 |
| 0.322 | 0.519 | -5.252 | 0.379  | 4.704 | 4.325 |
| 0.005 | 0.157 | -2.037 | -0.691 | 6.133 | 6.824 |
| 0.327 | 0.523 | -5.260 | -0.254 | 2.487 | 2.741 |
| 0.008 | 0.157 | -2.395 | -0.685 | 5.915 | 6.600 |
| 0.347 | 0.542 | -5.296 | -0.209 | 4.049 | 4.258 |
| 0.532 | 0.696 | -5.530 | 0.149  | 3.747 | 3.597 |
| 0.521 | 0.687 | -5.520 | -0.212 | 3.777 | 3.989 |
| 0.165 | 0.355 | -4.807 | 0.276  | 5.412 | 5.136 |
| 0.011 | 0.157 | -2.699 | -0.804 | 5.055 | 5.858 |
| 0.791 | 0.882 | -5.682 | -0.070 | 2.493 | 2.563 |
| 0.857 | 0.923 | -5.699 | -0.077 | 2.880 | 2.957 |
| 0.811 | 0.893 | -5.688 | -0.073 | 2.388 | 2.461 |
| 0.001 | 0.157 | -1.052 | 1.043  | 2.785 | 1.742 |
| 0.593 | 0.745 | -5.579 | 0.170  | 2.608 | 2.437 |
| 0.178 | 0.369 | -4.860 | 0.325  | 5.955 | 5.630 |
| 0.488 | 0.663 | -5.487 | 0.179  | 4.999 | 4.819 |
| 0.099 | 0.276 | -4.434 | 0.529  | 3.505 | 2.976 |
| 0.097 | 0.274 | -4.421 | 0.466  | 2.947 | 2.481 |
| 0.785 | 0.878 | -5.680 | -0.061 | 3.817 | 3.878 |
| 0.204 | 0.399 | -4.955 | 0.338  | 4.913 | 4.575 |
| 0.483 | 0.659 | -5.482 | 0.189  | 5.641 | 5.452 |
| 0.699 | 0.820 | -5.644 | -0.194 | 1.940 | 2.135 |
| 0.838 | 0.910 | -5.695 | -0.051 | 2.020 | 2.071 |
| 0.473 | 0.652 | -5.471 | -0.193 | 2.410 | 2.603 |
| 0.065 | 0.229 | -4.117 | -1.000 | 3.753 | 4.753 |
| 0.141 | 0.324 | -4.691 | -0.364 | 5.341 | 5.704 |
| 0.095 | 0.271 | -4.404 | 0.601  | 6.485 | 5.884 |
| 0.046 | 0.203 | -3.850 | 1.032  | 6.226 | 5.193 |
| 0.231 | 0.428 | -5.037 | 0.450  | 6.022 | 5.572 |
| 0.902 | 0.947 | -5.708 | -0.037 | 2.197 | 2.235 |
| 0.095 | 0.271 | -4.401 | -0.464 | 4.130 | 4.593 |
| 0.582 | 0.736 | -5.571 | -0.136 | 5.242 | 5.378 |
| 0.182 | 0.373 | -4.872 | 0.496  | 3.483 | 2.987 |
| 0.540 | 0.702 | -5.537 | -0.193 | 2.271 | 2.464 |
| 0.029 | 0.178 | -3.473 | 0.791  | 4.277 | 3.486 |
| 0.005 | 0.157 | -2.069 | -0.921 | 4.606 | 5.527 |
| 0.004 | 0.157 | -1.826 | 2.945  | 8.293 | 5.348 |
| 0.108 | 0.287 | -4.500 | 0.318  | 5.867 | 5.549 |
| 0.565 | 0.722 | -5.558 | 0.161  | 1.946 | 1.784 |
| 0.002 | 0.157 | -1.348 | 1.133  | 4.720 | 3.587 |
| 0.608 | 0.754 | -5.590 | 0.095  | 4.367 | 4.272 |
| 0.392 | 0.580 | -5.368 | -0.184 | 2.839 | 3.023 |
| 0.011 | 0.159 | -2.721 | -1.231 | 8.594 | 9.825 |
| 0.499 | 0.670 | -5.498 | 0.169  | 5.459 | 5.290 |
| 0.466 | 0.645 | -5.463 | -0.167 | 1.773 | 1.940 |
| 0.697 | 0.820 | -5.643 | -0.102 | 2.278 | 2.380 |
| 0.116 | 0.296 | -4.549 | 0.394  | 7.716 | 7.322 |
| 0.070 | 0.237 | -4.173 | 0.634  | 3.465 | 2.831 |

|       |       |        |        |       |       |
|-------|-------|--------|--------|-------|-------|
| 0.021 | 0.169 | -3.240 | 0.652  | 6.529 | 5.877 |
| 0.014 | 0.160 | -2.891 | -0.886 | 3.794 | 4.680 |
| 0.069 | 0.235 | -4.156 | -0.503 | 4.737 | 5.240 |
| 0.426 | 0.612 | -5.415 | -0.256 | 3.969 | 4.225 |
| 0.154 | 0.341 | -4.755 | 0.454  | 7.446 | 6.992 |
| 0.296 | 0.493 | -5.198 | -0.330 | 1.783 | 2.113 |
| 0.108 | 0.287 | -4.498 | -0.647 | 4.400 | 5.046 |
| 0.254 | 0.452 | -5.101 | 0.395  | 3.448 | 3.053 |
| 0.486 | 0.662 | -5.486 | -0.220 | 5.965 | 6.185 |
| 0.388 | 0.576 | -5.363 | -0.227 | 5.878 | 6.105 |
| 0.246 | 0.443 | -5.078 | 0.410  | 4.614 | 4.204 |
| 0.711 | 0.828 | -5.650 | -0.083 | 2.587 | 2.670 |
| 0.131 | 0.313 | -4.639 | 0.535  | 5.991 | 5.456 |
| 0.420 | 0.606 | -5.407 | 0.227  | 4.790 | 4.563 |
| 0.090 | 0.265 | -4.363 | -0.577 | 3.109 | 3.687 |
| 0.128 | 0.309 | -4.622 | 0.414  | 4.704 | 4.291 |
| 0.490 | 0.664 | -5.489 | 0.264  | 3.324 | 3.059 |
| 0.331 | 0.527 | -5.268 | 0.400  | 5.243 | 4.843 |
| 0.033 | 0.184 | -3.592 | -0.678 | 6.036 | 6.714 |
| 0.131 | 0.314 | -4.642 | -0.465 | 4.380 | 4.845 |
| 0.974 | 0.987 | -5.714 | 0.008  | 4.279 | 4.270 |
| 0.254 | 0.452 | -5.100 | 0.291  | 2.740 | 2.448 |
| 0.411 | 0.598 | -5.394 | -0.354 | 4.299 | 4.653 |
| 0.325 | 0.522 | -5.258 | -0.392 | 3.742 | 4.134 |
| 0.692 | 0.816 | -5.641 | 0.118  | 2.862 | 2.744 |
| 0.016 | 0.162 | -3.010 | 1.173  | 6.957 | 5.784 |
| 0.057 | 0.218 | -4.011 | 0.711  | 3.481 | 2.771 |
| 0.024 | 0.173 | -3.320 | 0.633  | 4.233 | 3.600 |
| 0.044 | 0.201 | -3.817 | 0.594  | 3.912 | 3.318 |
| 0.131 | 0.312 | -4.638 | 0.321  | 4.494 | 4.173 |
| 0.244 | 0.442 | -5.074 | 0.484  | 4.438 | 3.953 |
| 0.060 | 0.222 | -4.052 | 0.445  | 5.730 | 5.285 |
| 0.196 | 0.390 | -4.926 | -0.335 | 5.841 | 6.175 |
| 0.009 | 0.157 | -2.545 | 1.090  | 4.888 | 3.798 |
| 0.088 | 0.262 | -4.346 | 0.513  | 3.698 | 3.184 |
| 0.109 | 0.288 | -4.504 | -0.391 | 3.080 | 3.471 |
| 0.558 | 0.717 | -5.552 | -0.170 | 3.022 | 3.191 |
| 0.934 | 0.964 | -5.712 | 0.023  | 6.551 | 6.528 |
| 0.719 | 0.834 | -5.653 | -0.101 | 4.674 | 4.775 |
| 0.659 | 0.793 | -5.623 | 0.093  | 5.084 | 4.991 |
| 0.565 | 0.722 | -5.558 | 0.180  | 5.991 | 5.810 |
| 0.151 | 0.338 | -4.743 | -0.340 | 7.078 | 7.419 |
| 0.981 | 0.990 | -5.715 | -0.006 | 7.263 | 7.269 |
| 0.099 | 0.276 | -4.436 | -0.737 | 4.106 | 4.843 |
| 0.559 | 0.718 | -5.553 | 0.193  | 6.820 | 6.626 |
| 0.101 | 0.278 | -4.447 | 0.432  | 6.677 | 6.246 |
| 0.025 | 0.175 | -3.365 | -0.861 | 4.543 | 5.405 |
| 0.017 | 0.162 | -3.033 | -0.952 | 5.732 | 6.683 |
| 0.820 | 0.898 | -5.690 | 0.060  | 3.120 | 3.060 |
| 0.707 | 0.826 | -5.648 | 0.102  | 2.791 | 2.689 |

|       |       |        |        |       |       |
|-------|-------|--------|--------|-------|-------|
| 0.407 | 0.595 | -5.390 | 0.190  | 5.539 | 5.349 |
| 0.798 | 0.887 | -5.684 | -0.055 | 4.673 | 4.727 |
| 0.025 | 0.175 | -3.372 | 0.561  | 4.475 | 3.915 |
| 0.044 | 0.201 | -3.811 | -0.760 | 2.840 | 3.600 |
| 0.009 | 0.157 | -2.501 | -0.672 | 5.968 | 6.640 |
| 0.103 | 0.280 | -4.460 | 0.327  | 6.918 | 6.591 |
| 0.725 | 0.838 | -5.656 | -0.138 | 3.856 | 3.994 |
| 0.310 | 0.508 | -5.228 | -0.401 | 3.396 | 3.796 |
| 0.881 | 0.935 | -5.704 | 0.069  | 4.807 | 4.738 |
| 0.296 | 0.493 | -5.199 | -0.415 | 3.618 | 4.033 |
| 0.059 | 0.221 | -4.037 | -0.687 | 5.411 | 6.097 |
| 0.994 | 0.997 | -5.715 | -0.003 | 4.529 | 4.532 |
| 0.162 | 0.351 | -4.791 | -0.434 | 2.659 | 3.094 |
| 0.153 | 0.341 | -4.753 | -0.604 | 3.292 | 3.897 |
| 0.463 | 0.643 | -5.460 | -0.282 | 1.711 | 1.992 |
| 0.394 | 0.582 | -5.371 | 0.202  | 4.748 | 4.546 |
| 0.144 | 0.328 | -4.707 | 0.431  | 6.895 | 6.464 |
| 0.235 | 0.432 | -5.048 | 0.324  | 3.949 | 3.625 |
| 0.074 | 0.243 | -4.218 | 0.501  | 6.307 | 5.806 |
| 0.436 | 0.619 | -5.427 | -0.269 | 3.007 | 3.276 |
| 0.081 | 0.253 | -4.283 | -0.445 | 4.184 | 4.629 |
| 0.856 | 0.922 | -5.699 | 0.040  | 2.079 | 2.039 |
| 0.037 | 0.190 | -3.674 | -0.882 | 4.176 | 5.058 |
| 0.027 | 0.177 | -3.436 | -1.050 | 5.968 | 7.018 |
| 0.716 | 0.831 | -5.652 | -0.110 | 3.011 | 3.121 |
| 0.618 | 0.763 | -5.597 | 0.129  | 4.650 | 4.521 |
| 0.186 | 0.378 | -4.889 | -0.351 | 3.008 | 3.358 |
| 0.009 | 0.157 | -2.551 | -0.899 | 4.764 | 5.663 |
| 0.655 | 0.790 | -5.620 | -0.124 | 2.411 | 2.535 |
| 0.166 | 0.356 | -4.811 | -0.344 | 3.381 | 3.725 |
| 0.145 | 0.329 | -4.713 | 0.376  | 6.766 | 6.390 |
| 0.310 | 0.508 | -5.228 | 0.248  | 6.386 | 6.138 |
| 0.029 | 0.178 | -3.474 | -0.628 | 4.461 | 5.089 |
| 0.009 | 0.157 | -2.548 | -0.736 | 3.464 | 4.201 |
| 0.054 | 0.214 | -3.966 | 0.630  | 3.632 | 3.002 |
| 0.065 | 0.229 | -4.118 | -0.666 | 3.295 | 3.962 |
| 0.292 | 0.490 | -5.191 | -0.286 | 2.310 | 2.596 |
| 0.079 | 0.249 | -4.260 | 1.213  | 8.233 | 7.020 |
| 0.014 | 0.160 | -2.920 | 0.985  | 6.543 | 5.558 |
| 0.010 | 0.157 | -2.610 | 1.184  | 5.467 | 4.283 |
| 0.367 | 0.558 | -5.330 | -0.284 | 4.123 | 4.407 |
| 0.002 | 0.157 | -1.418 | -1.540 | 1.666 | 3.206 |
| 0.009 | 0.157 | -2.534 | -1.041 | 3.284 | 4.325 |
| 0.015 | 0.160 | -2.949 | -1.427 | 4.295 | 5.723 |
| 0.065 | 0.229 | -4.109 | -0.804 | 5.994 | 6.797 |
| 0.163 | 0.352 | -4.796 | 0.449  | 5.542 | 5.093 |
| 0.171 | 0.361 | -4.830 | 0.297  | 7.637 | 7.341 |
| 0.032 | 0.182 | -3.548 | 0.726  | 7.466 | 6.740 |
| 0.012 | 0.160 | -2.798 | -0.776 | 5.248 | 6.024 |
| 0.178 | 0.369 | -4.858 | 0.452  | 2.792 | 2.339 |

|       |       |        |        |       |       |
|-------|-------|--------|--------|-------|-------|
| 0.004 | 0.157 | -1.806 | 1.940  | 5.554 | 3.615 |
| 0.208 | 0.403 | -4.967 | -0.449 | 3.182 | 3.631 |
| 0.264 | 0.462 | -5.126 | 0.415  | 4.673 | 4.259 |
| 0.286 | 0.483 | -5.176 | 0.290  | 5.178 | 4.888 |
| 0.482 | 0.658 | -5.481 | 0.184  | 5.873 | 5.689 |
| 0.046 | 0.203 | -3.839 | -0.906 | 6.579 | 7.485 |
| 0.565 | 0.722 | -5.558 | -0.162 | 5.342 | 5.504 |
| 0.875 | 0.932 | -5.703 | -0.050 | 3.505 | 3.555 |
| 0.182 | 0.374 | -4.875 | 0.296  | 3.289 | 2.993 |
| 0.188 | 0.380 | -4.896 | 0.303  | 6.332 | 6.029 |
| 0.658 | 0.792 | -5.622 | -0.128 | 2.651 | 2.778 |
| 0.024 | 0.173 | -3.321 | -0.634 | 3.196 | 3.830 |
| 0.017 | 0.162 | -3.029 | -0.729 | 4.722 | 5.451 |
| 0.028 | 0.178 | -3.447 | 0.523  | 5.382 | 4.859 |
| 0.102 | 0.279 | -4.455 | 0.646  | 6.770 | 6.124 |
| 0.513 | 0.681 | -5.512 | 0.189  | 4.756 | 4.567 |
| 0.797 | 0.886 | -5.684 | 0.058  | 3.873 | 3.815 |
| 0.118 | 0.298 | -4.563 | -0.449 | 4.507 | 4.956 |
| 0.279 | 0.477 | -5.160 | 0.235  | 7.186 | 6.951 |
| 0.135 | 0.319 | -4.663 | 0.393  | 6.631 | 6.238 |
| 0.116 | 0.296 | -4.553 | 0.424  | 5.190 | 4.766 |
| 0.225 | 0.421 | -5.018 | 0.616  | 6.135 | 5.518 |
| 0.606 | 0.753 | -5.589 | 0.135  | 3.709 | 3.574 |
| 0.043 | 0.200 | -3.799 | -0.626 | 4.849 | 5.475 |
| 0.020 | 0.167 | -3.197 | 0.628  | 6.014 | 5.386 |
| 0.361 | 0.553 | -5.319 | 0.221  | 3.169 | 2.948 |
| 0.544 | 0.705 | -5.540 | 0.193  | 4.652 | 4.459 |
| 0.045 | 0.203 | -3.833 | -0.852 | 4.288 | 5.139 |
| 0.502 | 0.672 | -5.502 | -0.168 | 3.643 | 3.812 |
| 0.236 | 0.433 | -5.051 | 0.420  | 3.418 | 2.998 |
| 0.047 | 0.203 | -3.856 | -0.488 | 3.832 | 4.320 |
| 0.042 | 0.197 | -3.776 | 0.602  | 3.400 | 2.798 |
| 0.267 | 0.465 | -5.132 | 0.308  | 4.480 | 4.172 |
| 0.080 | 0.251 | -4.273 | -0.622 | 3.278 | 3.901 |
| 0.072 | 0.240 | -4.195 | 0.766  | 4.932 | 4.166 |
| 0.024 | 0.173 | -3.320 | 0.706  | 4.987 | 4.281 |
| 0.180 | 0.371 | -4.865 | 0.286  | 6.203 | 5.917 |
| 0.123 | 0.304 | -4.592 | 0.391  | 5.137 | 4.746 |
| 0.584 | 0.737 | -5.573 | 0.164  | 2.599 | 2.436 |
| 0.019 | 0.164 | -3.147 | -1.117 | 5.056 | 6.173 |
| 0.704 | 0.824 | -5.647 | -0.096 | 3.278 | 3.374 |
| 0.881 | 0.935 | -5.704 | 0.044  | 5.398 | 5.355 |
| 0.641 | 0.779 | -5.612 | 0.198  | 2.450 | 2.252 |
| 0.175 | 0.365 | -4.849 | 0.701  | 6.486 | 5.785 |
| 0.171 | 0.361 | -4.830 | 0.409  | 5.820 | 5.411 |
| 0.098 | 0.275 | -4.428 | -0.434 | 4.895 | 5.328 |
| 0.168 | 0.358 | -4.818 | 0.386  | 3.790 | 3.404 |
| 0.004 | 0.157 | -1.759 | -0.940 | 2.738 | 3.678 |
| 0.071 | 0.238 | -4.179 | -0.504 | 2.437 | 2.941 |
| 0.693 | 0.816 | -5.641 | -0.112 | 2.613 | 2.725 |

|       |       |        |        |       |       |
|-------|-------|--------|--------|-------|-------|
| 0.659 | 0.793 | -5.622 | 0.079  | 5.747 | 5.668 |
| 0.111 | 0.290 | -4.516 | 0.697  | 7.624 | 6.927 |
| 0.229 | 0.426 | -5.030 | 0.264  | 5.097 | 4.833 |
| 0.455 | 0.636 | -5.451 | 0.180  | 1.993 | 1.813 |
| 0.011 | 0.157 | -2.679 | -1.303 | 6.463 | 7.766 |
| 0.208 | 0.402 | -4.965 | 0.390  | 6.271 | 5.881 |
| 0.021 | 0.168 | -3.207 | 0.571  | 7.517 | 6.946 |
| 0.213 | 0.409 | -4.984 | 0.327  | 4.733 | 4.407 |
| 0.732 | 0.844 | -5.659 | 0.074  | 3.471 | 3.397 |
| 0.862 | 0.926 | -5.701 | 0.052  | 1.986 | 1.934 |
| 0.390 | 0.578 | -5.365 | 0.249  | 3.055 | 2.806 |
| 0.050 | 0.208 | -3.916 | 0.713  | 4.087 | 3.374 |
| 0.593 | 0.745 | -5.579 | 0.149  | 3.545 | 3.397 |
| 0.021 | 0.167 | -3.203 | -0.687 | 6.512 | 7.199 |
| 0.311 | 0.508 | -5.229 | -0.385 | 3.107 | 3.492 |
| 0.049 | 0.206 | -3.888 | -0.764 | 5.741 | 6.506 |
| 0.050 | 0.208 | -3.917 | -0.855 | 5.710 | 6.565 |
| 0.041 | 0.195 | -3.753 | -0.836 | 3.973 | 4.809 |
| 0.207 | 0.402 | -4.962 | -0.361 | 3.685 | 4.047 |
| 0.433 | 0.617 | -5.423 | 0.210  | 7.840 | 7.630 |
| 0.015 | 0.161 | -2.963 | 0.665  | 9.525 | 8.860 |
| 0.193 | 0.385 | -4.913 | 0.430  | 2.962 | 2.532 |
| 0.338 | 0.533 | -5.280 | -0.384 | 3.528 | 3.912 |
| 0.864 | 0.927 | -5.701 | -0.043 | 5.078 | 5.121 |
| 0.992 | 0.996 | -5.715 | -0.003 | 4.050 | 4.053 |
| 0.250 | 0.447 | -5.089 | -0.534 | 2.651 | 3.184 |
| 0.037 | 0.190 | -3.676 | 0.505  | 6.702 | 6.197 |
| 0.039 | 0.194 | -3.725 | -0.790 | 5.603 | 6.393 |
| 0.137 | 0.320 | -4.672 | 0.300  | 7.159 | 6.859 |
| 0.148 | 0.332 | -4.727 | -0.531 | 5.793 | 6.324 |
| 0.095 | 0.271 | -4.402 | 0.395  | 6.632 | 6.237 |
| 0.027 | 0.176 | -3.421 | 0.606  | 8.130 | 7.524 |
| 0.032 | 0.182 | -3.549 | -1.191 | 3.902 | 5.093 |
| 0.743 | 0.851 | -5.664 | -0.086 | 3.935 | 4.021 |
| 0.686 | 0.812 | -5.637 | -0.162 | 4.307 | 4.469 |
| 0.921 | 0.958 | -5.710 | 0.028  | 3.627 | 3.599 |
| 0.231 | 0.428 | -5.036 | -0.280 | 1.737 | 2.017 |
| 0.053 | 0.213 | -3.954 | 0.797  | 4.520 | 3.723 |
| 0.251 | 0.448 | -5.092 | 0.319  | 4.692 | 4.373 |
| 0.357 | 0.551 | -5.313 | 0.252  | 3.195 | 2.943 |
| 0.113 | 0.292 | -4.531 | -0.451 | 3.076 | 3.527 |
| 0.261 | 0.459 | -5.118 | 0.298  | 3.626 | 3.327 |
| 0.050 | 0.208 | -3.915 | 0.642  | 4.265 | 3.623 |
| 0.884 | 0.937 | -5.705 | 0.052  | 4.960 | 4.908 |
| 0.672 | 0.802 | -5.630 | -0.152 | 2.257 | 2.409 |
| 0.825 | 0.901 | -5.692 | 0.071  | 3.374 | 3.303 |
| 0.139 | 0.324 | -4.684 | -0.342 | 4.755 | 5.097 |
| 0.586 | 0.739 | -5.574 | -0.251 | 5.932 | 6.183 |
| 0.145 | 0.329 | -4.712 | -0.492 | 7.142 | 7.634 |
| 0.050 | 0.208 | -3.915 | 0.576  | 3.910 | 3.334 |



|       |       |        |        |       |       |
|-------|-------|--------|--------|-------|-------|
| 0.576 | 0.730 | -5.566 | -0.227 | 4.339 | 4.566 |
| 0.490 | 0.664 | -5.489 | 0.208  | 3.631 | 3.423 |
| 0.529 | 0.694 | -5.527 | -0.146 | 2.405 | 2.552 |
| 0.666 | 0.798 | -5.627 | -0.150 | 2.092 | 2.242 |
| 0.355 | 0.549 | -5.310 | -0.198 | 7.062 | 7.259 |
| 0.905 | 0.949 | -5.708 | -0.036 | 1.926 | 1.962 |
| 0.022 | 0.171 | -3.277 | 0.623  | 3.184 | 2.561 |
| 0.004 | 0.157 | -1.964 | 0.902  | 3.292 | 2.391 |
| 0.017 | 0.162 | -3.052 | -1.164 | 4.201 | 5.364 |
| 0.049 | 0.207 | -3.894 | -0.587 | 3.839 | 4.426 |
| 0.011 | 0.157 | -2.679 | -0.518 | 4.634 | 5.152 |
| 0.091 | 0.266 | -4.368 | 0.432  | 4.180 | 3.747 |
| 0.291 | 0.489 | -5.189 | 0.287  | 4.420 | 4.133 |
| 0.365 | 0.557 | -5.327 | 0.221  | 4.351 | 4.130 |
| 0.640 | 0.778 | -5.611 | 0.122  | 4.380 | 4.258 |
| 0.869 | 0.928 | -5.702 | 0.042  | 3.963 | 3.921 |
| 0.069 | 0.235 | -4.155 | -0.502 | 4.572 | 5.074 |
| 0.614 | 0.759 | -5.594 | -0.146 | 2.391 | 2.537 |
| 0.053 | 0.213 | -3.953 | 0.468  | 6.485 | 6.017 |
| 0.976 | 0.988 | -5.714 | -0.010 | 5.675 | 5.685 |
| 0.067 | 0.233 | -4.140 | 0.431  | 7.109 | 6.678 |
| 0.029 | 0.178 | -3.494 | 0.697  | 7.684 | 6.987 |
| 0.063 | 0.226 | -4.084 | 0.429  | 4.905 | 4.476 |
| 0.040 | 0.194 | -3.729 | 0.406  | 7.165 | 6.758 |
| 0.142 | 0.326 | -4.699 | 0.328  | 6.981 | 6.653 |
| 0.001 | 0.157 | -0.887 | 1.112  | 8.089 | 6.977 |
| 0.189 | 0.382 | -4.901 | 0.418  | 4.360 | 3.942 |
| 0.803 | 0.889 | -5.685 | -0.072 | 4.603 | 4.675 |
| 0.566 | 0.723 | -5.559 | -0.163 | 3.391 | 3.553 |
| 0.095 | 0.271 | -4.404 | -0.484 | 3.724 | 4.208 |
| 0.008 | 0.157 | -2.413 | -1.177 | 6.386 | 7.563 |
| 0.270 | 0.468 | -5.140 | -0.281 | 4.348 | 4.629 |
| 0.106 | 0.284 | -4.486 | -0.653 | 3.830 | 4.483 |
| 0.427 | 0.613 | -5.416 | 0.239  | 3.088 | 2.849 |
| 0.231 | 0.428 | -5.037 | -0.414 | 3.278 | 3.692 |
| 0.040 | 0.194 | -3.742 | -0.555 | 5.409 | 5.964 |
| 0.982 | 0.990 | -5.715 | 0.006  | 6.085 | 6.079 |
| 0.476 | 0.653 | -5.474 | 0.208  | 3.280 | 3.072 |
| 0.146 | 0.330 | -4.719 | 0.410  | 4.615 | 4.205 |
| 0.575 | 0.730 | -5.566 | -0.150 | 3.658 | 3.809 |
| 0.047 | 0.204 | -3.863 | 0.619  | 7.152 | 6.533 |
| 0.847 | 0.915 | -5.697 | -0.041 | 9.393 | 9.434 |
| 0.093 | 0.270 | -4.390 | -0.713 | 6.873 | 7.586 |
| 0.036 | 0.189 | -3.663 | 0.624  | 8.361 | 7.736 |
| 0.118 | 0.298 | -4.562 | -0.444 | 2.776 | 3.219 |
| 0.329 | 0.524 | -5.264 | 0.367  | 2.715 | 2.348 |
| 0.970 | 0.985 | -5.714 | 0.010  | 2.037 | 2.027 |
| 0.448 | 0.630 | -5.442 | 0.232  | 4.883 | 4.651 |
| 0.022 | 0.171 | -3.274 | -0.667 | 6.499 | 7.166 |
| 0.450 | 0.631 | -5.445 | 0.300  | 6.016 | 5.716 |

|       |       |        |        |       |       |
|-------|-------|--------|--------|-------|-------|
| 0.816 | 0.896 | -5.689 | -0.068 | 3.593 | 3.661 |
| 0.012 | 0.160 | -2.768 | 0.936  | 3.685 | 2.749 |
| 0.691 | 0.815 | -5.640 | -0.112 | 3.952 | 4.065 |
| 0.026 | 0.176 | -3.391 | -0.810 | 3.551 | 4.361 |
| 0.227 | 0.424 | -5.024 | -0.359 | 2.082 | 2.441 |
| 0.045 | 0.203 | -3.835 | 0.470  | 3.972 | 3.501 |
| 0.019 | 0.165 | -3.152 | -0.683 | 4.488 | 5.171 |
| 0.781 | 0.874 | -5.678 | -0.059 | 2.488 | 2.547 |
| 0.277 | 0.475 | -5.156 | -0.350 | 2.089 | 2.439 |
| 0.156 | 0.344 | -4.766 | -0.786 | 2.321 | 3.107 |
| 0.015 | 0.160 | -2.924 | -0.670 | 6.831 | 7.501 |
| 0.604 | 0.752 | -5.587 | -0.142 | 2.107 | 2.249 |
| 0.427 | 0.612 | -5.416 | -0.163 | 2.673 | 2.836 |
| 0.040 | 0.194 | -3.733 | 0.821  | 6.232 | 5.411 |
| 0.283 | 0.481 | -5.170 | 0.289  | 5.323 | 5.034 |
| 0.641 | 0.779 | -5.612 | 0.136  | 2.821 | 2.684 |
| 0.018 | 0.162 | -3.081 | 0.651  | 7.872 | 7.222 |
| 0.836 | 0.908 | -5.695 | 0.062  | 3.131 | 3.069 |
| 0.603 | 0.752 | -5.587 | 0.161  | 3.572 | 3.412 |
| 0.330 | 0.526 | -5.267 | -0.404 | 3.225 | 3.629 |
| 0.061 | 0.223 | -4.064 | 0.759  | 5.718 | 4.959 |
| 0.195 | 0.389 | -4.922 | 0.387  | 2.823 | 2.436 |
| 0.100 | 0.277 | -4.439 | -0.566 | 1.609 | 2.176 |
| 0.832 | 0.906 | -5.693 | 0.081  | 3.025 | 2.944 |
| 0.759 | 0.861 | -5.670 | 0.088  | 2.909 | 2.821 |
| 0.715 | 0.831 | -5.652 | -0.140 | 3.443 | 3.582 |
| 0.116 | 0.296 | -4.553 | -0.441 | 2.641 | 3.081 |
| 0.510 | 0.679 | -5.509 | 0.205  | 2.599 | 2.394 |
| 0.796 | 0.885 | -5.683 | 0.082  | 2.743 | 2.661 |
| 0.288 | 0.486 | -5.181 | -0.426 | 4.332 | 4.758 |
| 0.105 | 0.283 | -4.476 | -0.530 | 1.760 | 2.289 |
| 0.134 | 0.317 | -4.656 | 0.563  | 5.247 | 4.684 |
| 0.959 | 0.979 | -5.714 | 0.020  | 1.630 | 1.610 |
| 0.787 | 0.879 | -5.680 | 0.175  | 2.723 | 2.548 |
| 0.362 | 0.554 | -5.322 | 0.708  | 5.290 | 4.582 |
| 0.682 | 0.809 | -5.635 | -0.116 | 2.119 | 2.235 |
| 0.130 | 0.311 | -4.632 | -0.434 | 2.795 | 3.229 |
| 0.003 | 0.157 | -1.729 | 1.773  | 6.735 | 4.962 |
| 0.026 | 0.176 | -3.408 | 0.938  | 4.417 | 3.480 |
| 0.672 | 0.803 | -5.630 | 0.109  | 4.390 | 4.281 |
| 0.159 | 0.347 | -4.778 | -0.532 | 5.377 | 5.909 |
| 0.202 | 0.397 | -4.947 | 0.392  | 3.578 | 3.186 |
| 0.544 | 0.706 | -5.541 | -0.182 | 3.282 | 3.464 |
| 0.961 | 0.980 | -5.714 | -0.014 | 5.209 | 5.223 |
| 0.226 | 0.423 | -5.023 | 0.262  | 6.858 | 6.595 |
| 0.230 | 0.428 | -5.035 | 0.323  | 5.090 | 4.767 |
| 0.535 | 0.698 | -5.532 | 0.150  | 4.522 | 4.372 |
| 0.007 | 0.157 | -2.316 | 0.928  | 9.252 | 8.324 |
| 0.262 | 0.460 | -5.119 | -0.387 | 4.318 | 4.705 |
| 0.790 | 0.881 | -5.681 | 0.079  | 4.670 | 4.591 |

|       |       |        |        |       |       |
|-------|-------|--------|--------|-------|-------|
| 0.841 | 0.912 | -5.696 | 0.044  | 2.929 | 2.885 |
| 0.397 | 0.585 | -5.376 | -0.186 | 5.370 | 5.556 |
| 0.069 | 0.236 | -4.165 | -0.441 | 4.534 | 4.975 |
| 0.107 | 0.285 | -4.490 | -0.710 | 3.495 | 4.205 |
| 0.126 | 0.306 | -4.610 | -0.482 | 2.683 | 3.165 |
| 0.002 | 0.157 | -1.374 | -0.985 | 4.014 | 4.999 |
| 0.564 | 0.721 | -5.557 | -0.152 | 4.651 | 4.804 |
| 0.071 | 0.238 | -4.181 | -0.661 | 3.316 | 3.977 |
| 0.707 | 0.826 | -5.648 | 0.121  | 3.874 | 3.753 |
| 0.047 | 0.203 | -3.858 | -0.711 | 2.958 | 3.669 |
| 0.183 | 0.374 | -4.877 | 0.291  | 7.107 | 6.816 |
| 0.078 | 0.249 | -4.258 | 0.432  | 6.622 | 6.190 |
| 0.206 | 0.401 | -4.959 | -0.286 | 2.703 | 2.989 |
| 0.244 | 0.442 | -5.073 | 0.281  | 4.622 | 4.341 |
| 0.338 | 0.534 | -5.281 | -0.294 | 4.673 | 4.966 |
| 0.178 | 0.369 | -4.858 | 0.393  | 4.027 | 3.635 |
| 0.817 | 0.896 | -5.689 | 0.055  | 5.174 | 5.119 |
| 0.341 | 0.536 | -5.285 | -0.226 | 4.362 | 4.588 |
| 0.172 | 0.362 | -4.835 | 0.528  | 5.481 | 4.954 |
| 0.163 | 0.352 | -4.795 | 0.319  | 3.922 | 3.603 |
| 0.852 | 0.920 | -5.698 | -0.065 | 2.748 | 2.812 |
| 0.013 | 0.160 | -2.839 | 0.932  | 4.632 | 3.700 |
| 0.171 | 0.361 | -4.831 | 0.830  | 5.697 | 4.867 |
| 0.002 | 0.157 | -1.159 | 0.931  | 3.146 | 2.215 |
| 0.197 | 0.391 | -4.928 | -0.466 | 6.747 | 7.213 |
| 0.739 | 0.848 | -5.662 | 0.087  | 3.895 | 3.808 |
| 0.065 | 0.229 | -4.116 | -0.708 | 3.361 | 4.070 |
| 0.027 | 0.176 | -3.415 | -0.525 | 5.930 | 6.455 |
| 0.019 | 0.164 | -3.145 | -1.113 | 2.279 | 3.391 |
| 0.006 | 0.157 | -2.251 | 0.672  | 5.997 | 5.325 |
| 0.563 | 0.721 | -5.556 | 0.123  | 6.764 | 6.641 |
| 0.082 | 0.254 | -4.294 | 0.393  | 5.555 | 5.162 |
| 0.079 | 0.249 | -4.262 | 0.417  | 4.750 | 4.334 |
| 0.054 | 0.214 | -3.964 | 0.622  | 6.864 | 6.243 |
| 0.031 | 0.181 | -3.540 | -0.660 | 3.930 | 4.590 |
| 0.054 | 0.215 | -3.974 | -0.492 | 3.053 | 3.545 |
| 0.824 | 0.900 | -5.691 | -0.080 | 2.138 | 2.218 |
| 0.745 | 0.852 | -5.665 | 0.079  | 5.296 | 5.217 |
| 0.117 | 0.297 | -4.558 | 0.400  | 5.225 | 4.825 |
| 0.655 | 0.790 | -5.620 | -0.122 | 3.010 | 3.133 |
| 0.104 | 0.281 | -4.470 | -0.434 | 2.770 | 3.205 |
| 0.040 | 0.194 | -3.728 | 1.216  | 8.695 | 7.479 |
| 0.078 | 0.247 | -4.251 | 0.546  | 4.306 | 3.760 |
| 0.050 | 0.207 | -3.907 | -0.851 | 4.636 | 5.487 |
| 0.280 | 0.478 | -5.163 | 0.266  | 5.505 | 5.240 |
| 0.358 | 0.551 | -5.315 | -0.280 | 3.471 | 3.751 |
| 0.152 | 0.339 | -4.748 | 0.504  | 4.349 | 3.846 |
| 0.390 | 0.578 | -5.365 | -0.183 | 5.715 | 5.898 |
| 0.195 | 0.389 | -4.924 | 0.292  | 5.882 | 5.590 |
| 0.723 | 0.837 | -5.655 | -0.082 | 4.889 | 4.971 |

|       |       |        |        |       |       |
|-------|-------|--------|--------|-------|-------|
| 0.047 | 0.204 | -3.864 | 0.634  | 7.991 | 7.357 |
| 0.018 | 0.162 | -3.088 | -0.980 | 1.856 | 2.837 |
| 0.007 | 0.157 | -2.294 | 0.589  | 4.774 | 4.185 |
| 0.206 | 0.401 | -4.959 | -0.351 | 3.244 | 3.595 |
| 0.829 | 0.904 | -5.693 | 0.054  | 4.074 | 4.019 |
| 0.020 | 0.167 | -3.195 | 0.825  | 8.261 | 7.436 |
| 0.024 | 0.173 | -3.318 | 0.622  | 8.223 | 7.600 |
| 0.263 | 0.461 | -5.124 | 0.273  | 8.450 | 8.176 |
| 0.207 | 0.402 | -4.964 | 0.290  | 5.417 | 5.127 |
| 0.896 | 0.943 | -5.707 | 0.037  | 2.669 | 2.632 |
| 0.225 | 0.422 | -5.020 | -0.441 | 2.861 | 3.302 |
| 0.040 | 0.194 | -3.734 | -0.703 | 5.423 | 6.126 |
| 0.072 | 0.240 | -4.196 | 0.639  | 4.333 | 3.694 |
| 0.235 | 0.432 | -5.050 | 0.279  | 5.847 | 5.568 |
| 0.079 | 0.249 | -4.259 | 0.410  | 8.140 | 7.730 |
| 0.263 | 0.461 | -5.122 | -0.346 | 4.098 | 4.444 |
| 0.027 | 0.176 | -3.430 | 0.491  | 6.649 | 6.158 |
| 0.524 | 0.689 | -5.523 | 0.127  | 6.430 | 6.303 |
| 0.790 | 0.880 | -5.681 | 0.067  | 3.549 | 3.482 |
| 0.987 | 0.993 | -5.715 | 0.005  | 3.486 | 3.481 |
| 0.698 | 0.820 | -5.643 | 0.101  | 3.850 | 3.748 |
| 0.746 | 0.853 | -5.665 | -0.090 | 2.518 | 2.608 |
| 0.006 | 0.157 | -2.238 | 0.702  | 6.831 | 6.129 |
| 0.611 | 0.757 | -5.592 | 0.127  | 2.361 | 2.234 |
| 0.386 | 0.574 | -5.359 | -0.230 | 4.584 | 4.814 |
| 0.257 | 0.455 | -5.109 | 0.337  | 3.341 | 3.004 |
| 0.230 | 0.427 | -5.034 | 0.399  | 5.315 | 4.916 |
| 0.006 | 0.157 | -2.200 | 0.829  | 5.816 | 4.987 |
| 0.945 | 0.970 | -5.713 | -0.019 | 5.472 | 5.491 |
| 0.927 | 0.960 | -5.711 | -0.023 | 2.586 | 2.609 |
| 0.067 | 0.233 | -4.142 | 0.428  | 4.083 | 3.655 |
| 0.182 | 0.373 | -4.872 | -0.378 | 4.650 | 5.028 |
| 0.045 | 0.201 | -3.822 | 0.453  | 6.761 | 6.308 |
| 0.074 | 0.242 | -4.217 | 1.080  | 6.455 | 5.375 |
| 0.006 | 0.157 | -2.170 | 1.251  | 4.688 | 3.438 |
| 0.561 | 0.720 | -5.555 | 0.138  | 5.315 | 5.177 |
| 0.365 | 0.556 | -5.326 | -0.295 | 3.084 | 3.379 |
| 0.020 | 0.167 | -3.181 | -0.670 | 5.127 | 5.796 |
| 0.355 | 0.549 | -5.310 | -0.236 | 7.727 | 7.963 |
| 0.027 | 0.177 | -3.438 | -0.898 | 4.348 | 5.246 |
| 0.001 | 0.157 | -0.819 | -1.138 | 3.462 | 4.600 |
| 0.107 | 0.285 | -4.490 | -0.936 | 3.552 | 4.488 |
| 0.893 | 0.941 | -5.706 | 0.041  | 4.684 | 4.643 |
| 0.179 | 0.369 | -4.861 | -0.557 | 3.465 | 4.022 |
| 0.410 | 0.597 | -5.393 | 0.189  | 5.064 | 4.875 |
| 0.149 | 0.335 | -4.735 | 0.709  | 3.819 | 3.110 |
| 0.257 | 0.455 | -5.107 | -0.536 | 2.944 | 3.479 |
| 0.965 | 0.982 | -5.714 | -0.052 | 5.610 | 5.661 |
| 0.206 | 0.401 | -4.960 | -0.296 | 5.185 | 5.481 |
| 0.012 | 0.160 | -2.759 | -1.059 | 6.824 | 7.883 |

|       |       |        |        |       |       |
|-------|-------|--------|--------|-------|-------|
| 0.431 | 0.616 | -5.421 | 0.213  | 7.064 | 6.851 |
| 0.166 | 0.356 | -4.811 | 0.395  | 2.471 | 2.076 |
| 0.190 | 0.383 | -4.905 | -0.430 | 2.393 | 2.823 |
| 0.645 | 0.782 | -5.615 | -0.151 | 2.200 | 2.351 |
| 0.033 | 0.184 | -3.584 | 0.854  | 4.504 | 3.650 |
| 0.530 | 0.694 | -5.528 | -0.294 | 2.020 | 2.314 |
| 0.647 | 0.784 | -5.616 | 0.119  | 7.107 | 6.988 |
| 0.691 | 0.815 | -5.640 | -0.116 | 4.484 | 4.600 |
| 0.749 | 0.855 | -5.666 | 0.105  | 4.370 | 4.265 |
| 0.191 | 0.384 | -4.908 | 0.329  | 7.314 | 6.985 |
| 0.029 | 0.178 | -3.492 | 0.818  | 4.651 | 3.833 |
| 0.244 | 0.442 | -5.073 | 0.262  | 5.100 | 4.838 |
| 0.015 | 0.160 | -2.938 | 0.946  | 6.891 | 5.945 |
| 0.297 | 0.494 | -5.201 | 0.293  | 4.363 | 4.070 |
| 0.339 | 0.535 | -5.283 | -0.308 | 3.512 | 3.820 |
| 0.914 | 0.954 | -5.709 | 0.108  | 4.679 | 4.571 |
| 0.934 | 0.965 | -5.712 | 0.077  | 4.517 | 4.440 |
| 0.319 | 0.517 | -5.246 | 0.225  | 5.937 | 5.712 |
| 0.015 | 0.161 | -2.970 | -0.996 | 7.584 | 8.580 |
| 0.293 | 0.491 | -5.192 | -0.256 | 4.306 | 4.562 |
| 0.831 | 0.905 | -5.693 | -0.045 | 4.109 | 4.154 |
| 0.189 | 0.381 | -4.899 | -0.621 | 3.190 | 3.811 |
| 0.338 | 0.533 | -5.280 | -0.417 | 7.271 | 7.687 |
| 0.554 | 0.715 | -5.549 | 0.181  | 2.881 | 2.700 |
| 0.175 | 0.364 | -4.846 | 0.278  | 4.865 | 4.587 |
| 0.489 | 0.664 | -5.489 | 0.155  | 2.837 | 2.683 |
| 0.097 | 0.273 | -4.415 | -0.505 | 4.415 | 4.920 |
| 0.126 | 0.306 | -4.609 | 0.471  | 6.054 | 5.583 |
| 0.114 | 0.293 | -4.538 | -0.433 | 3.993 | 4.426 |
| 0.274 | 0.472 | -5.149 | -0.395 | 3.870 | 4.265 |
| 0.202 | 0.397 | -4.945 | 0.319  | 5.832 | 5.513 |
| 0.500 | 0.671 | -5.500 | -0.188 | 5.343 | 5.531 |
| 0.252 | 0.450 | -5.095 | -0.357 | 5.809 | 6.167 |
| 0.434 | 0.618 | -5.425 | 0.165  | 6.128 | 5.963 |
| 0.144 | 0.328 | -4.707 | 0.359  | 6.472 | 6.113 |
| 0.097 | 0.273 | -4.414 | 0.437  | 7.094 | 6.656 |
| 0.828 | 0.903 | -5.692 | -0.077 | 2.935 | 3.013 |
| 0.053 | 0.212 | -3.949 | 1.114  | 7.260 | 6.146 |
| 0.058 | 0.220 | -4.031 | 0.748  | 5.415 | 4.667 |
| 0.037 | 0.190 | -3.669 | 0.484  | 4.983 | 4.498 |
| 0.136 | 0.319 | -4.666 | -0.492 | 2.166 | 2.658 |
| 0.382 | 0.571 | -5.353 | 0.198  | 7.364 | 7.166 |
| 0.209 | 0.404 | -4.970 | 0.276  | 3.949 | 3.673 |
| 0.326 | 0.522 | -5.258 | 0.203  | 8.071 | 7.869 |
| 0.120 | 0.301 | -4.577 | 0.321  | 8.037 | 7.716 |
| 0.305 | 0.502 | -5.216 | -0.242 | 3.750 | 3.992 |
| 0.597 | 0.747 | -5.582 | 0.167  | 4.964 | 4.797 |
| 0.861 | 0.926 | -5.700 | -0.049 | 3.167 | 3.217 |
| 0.149 | 0.335 | -4.734 | 0.432  | 5.552 | 5.120 |
| 0.106 | 0.284 | -4.486 | 0.434  | 7.726 | 7.292 |

|       |       |        |        |       |       |
|-------|-------|--------|--------|-------|-------|
| 0.207 | 0.402 | -4.963 | 0.263  | 5.565 | 5.302 |
| 0.459 | 0.640 | -5.455 | -0.195 | 3.575 | 3.771 |
| 0.090 | 0.264 | -4.359 | -0.687 | 2.696 | 3.383 |
| 0.812 | 0.894 | -5.688 | -0.070 | 6.455 | 6.525 |
| 0.071 | 0.239 | -4.183 | 0.509  | 6.415 | 5.907 |
| 0.022 | 0.171 | -3.262 | -0.787 | 2.829 | 3.616 |
| 0.048 | 0.205 | -3.885 | 0.438  | 4.915 | 4.476 |
| 0.012 | 0.160 | -2.753 | -1.225 | 8.060 | 9.286 |
| 0.060 | 0.221 | -4.046 | 0.483  | 7.110 | 6.627 |
| 0.109 | 0.288 | -4.503 | 0.383  | 5.619 | 5.236 |
| 0.890 | 0.940 | -5.706 | 0.038  | 3.759 | 3.721 |
| 0.137 | 0.320 | -4.670 | -0.454 | 4.541 | 4.995 |
| 0.859 | 0.924 | -5.700 | 0.062  | 2.581 | 2.519 |
| 0.154 | 0.341 | -4.758 | -0.450 | 4.731 | 5.181 |
| 0.022 | 0.170 | -3.252 | 1.466  | 8.208 | 6.742 |
| 0.013 | 0.160 | -2.816 | 1.654  | 7.952 | 6.299 |
| 0.033 | 0.184 | -3.575 | -0.698 | 3.143 | 3.841 |
| 0.013 | 0.160 | -2.843 | 1.363  | 5.863 | 4.500 |
| 0.004 | 0.157 | -1.955 | -0.903 | 5.490 | 6.393 |
| 0.035 | 0.186 | -3.627 | -0.594 | 5.398 | 5.992 |
| 0.766 | 0.865 | -5.673 | -0.083 | 2.397 | 2.481 |
| 0.043 | 0.200 | -3.795 | 1.095  | 6.466 | 5.371 |
| 0.073 | 0.241 | -4.200 | 0.616  | 7.106 | 6.491 |
| 0.041 | 0.195 | -3.753 | 0.956  | 7.803 | 6.847 |
| 0.254 | 0.452 | -5.101 | -0.294 | 3.586 | 3.880 |
| 0.758 | 0.860 | -5.670 | -0.073 | 3.848 | 3.921 |
| 0.091 | 0.267 | -4.372 | 0.425  | 6.510 | 6.084 |
| 0.114 | 0.293 | -4.536 | 0.476  | 4.262 | 3.786 |
| 0.348 | 0.543 | -5.298 | 0.222  | 4.206 | 3.984 |
| 0.146 | 0.331 | -4.720 | 0.343  | 4.280 | 3.937 |
| 0.055 | 0.216 | -3.985 | 0.363  | 9.198 | 8.835 |
| 0.142 | 0.326 | -4.697 | 0.385  | 5.151 | 4.766 |
| 0.136 | 0.319 | -4.665 | 0.333  | 4.531 | 4.198 |
| 0.241 | 0.438 | -5.065 | 0.322  | 6.948 | 6.626 |
| 0.008 | 0.157 | -2.460 | -1.054 | 2.283 | 3.337 |
| 0.028 | 0.178 | -3.465 | 0.496  | 8.300 | 7.804 |
| 0.522 | 0.688 | -5.521 | 0.181  | 4.723 | 4.543 |
| 0.431 | 0.616 | -5.422 | 0.225  | 4.793 | 4.568 |
| 0.668 | 0.800 | -5.628 | 0.122  | 4.597 | 4.476 |
| 0.163 | 0.352 | -4.795 | 0.442  | 4.704 | 4.262 |
| 0.009 | 0.157 | -2.566 | 0.596  | 7.391 | 6.794 |
| 0.166 | 0.355 | -4.809 | 0.489  | 4.688 | 4.199 |
| 0.624 | 0.767 | -5.601 | 0.123  | 5.001 | 4.878 |
| 0.821 | 0.899 | -5.690 | -0.045 | 7.882 | 7.928 |
| 0.063 | 0.227 | -4.096 | 0.736  | 4.289 | 3.553 |
| 0.154 | 0.341 | -4.754 | 0.269  | 6.674 | 6.405 |
| 0.061 | 0.224 | -4.071 | -0.508 | 4.799 | 5.308 |
| 0.122 | 0.303 | -4.586 | 0.497  | 3.954 | 3.457 |
| 0.438 | 0.622 | -5.431 | -0.191 | 6.228 | 6.419 |
| 0.003 | 0.157 | -1.749 | -0.970 | 6.898 | 7.868 |

|       |       |        |        |       |       |
|-------|-------|--------|--------|-------|-------|
| 0.893 | 0.942 | -5.706 | 0.158  | 6.139 | 5.981 |
| 0.688 | 0.814 | -5.639 | -0.105 | 3.213 | 3.318 |
| 0.801 | 0.888 | -5.685 | 0.057  | 5.804 | 5.748 |
| 0.153 | 0.340 | -4.752 | -0.355 | 6.207 | 6.562 |
| 0.421 | 0.607 | -5.409 | -0.381 | 1.466 | 1.848 |
| 0.889 | 0.940 | -5.706 | -0.146 | 3.810 | 3.956 |
| 0.541 | 0.703 | -5.538 | -0.190 | 3.786 | 3.976 |
| 0.741 | 0.849 | -5.663 | 0.124  | 8.485 | 8.361 |
| 0.108 | 0.287 | -4.496 | 0.332  | 8.431 | 8.099 |
| 0.068 | 0.234 | -4.149 | -0.534 | 6.957 | 7.491 |
| 0.133 | 0.316 | -4.652 | 0.400  | 6.922 | 6.522 |
| 0.260 | 0.457 | -5.115 | -0.262 | 4.595 | 4.857 |
| 0.138 | 0.322 | -4.679 | -0.547 | 3.698 | 4.245 |
| 0.028 | 0.178 | -3.463 | -0.578 | 4.177 | 4.755 |
| 0.013 | 0.160 | -2.806 | -0.676 | 4.825 | 5.501 |
| 0.033 | 0.184 | -3.583 | -0.545 | 4.988 | 5.533 |
| 0.041 | 0.195 | -3.756 | -0.527 | 5.616 | 6.143 |
| 0.886 | 0.937 | -5.705 | -0.058 | 7.600 | 7.658 |
| 0.081 | 0.253 | -4.285 | -0.608 | 3.941 | 4.549 |
| 0.148 | 0.332 | -4.728 | 0.353  | 3.092 | 2.739 |
| 0.351 | 0.546 | -5.304 | -0.281 | 2.589 | 2.871 |
| 0.642 | 0.780 | -5.612 | -0.182 | 4.274 | 4.456 |
| 0.011 | 0.158 | -2.710 | -0.918 | 5.792 | 6.711 |
| 0.393 | 0.581 | -5.370 | -0.250 | 1.078 | 1.328 |
| 0.502 | 0.672 | -5.502 | 0.197  | 6.180 | 5.983 |
| 0.185 | 0.377 | -4.887 | 0.302  | 7.129 | 6.827 |
| 0.349 | 0.544 | -5.301 | 0.218  | 4.680 | 4.462 |
| 0.493 | 0.667 | -5.493 | 0.216  | 3.493 | 3.277 |
| 0.188 | 0.380 | -4.896 | 0.274  | 9.161 | 8.887 |
| 0.385 | 0.574 | -5.358 | -0.473 | 4.735 | 5.208 |
| 0.951 | 0.975 | -5.713 | 0.016  | 3.130 | 3.113 |
| 0.004 | 0.157 | -1.788 | -0.738 | 5.626 | 6.364 |
| 0.511 | 0.679 | -5.510 | 0.260  | 5.138 | 4.877 |
| 0.128 | 0.308 | -4.620 | -0.415 | 2.419 | 2.834 |
| 0.383 | 0.572 | -5.355 | 0.206  | 5.624 | 5.418 |
| 0.926 | 0.960 | -5.711 | -0.030 | 4.182 | 4.212 |
| 0.101 | 0.278 | -4.448 | 0.750  | 5.181 | 4.431 |
| 0.016 | 0.162 | -2.983 | 1.100  | 5.160 | 4.060 |
| 0.033 | 0.184 | -3.579 | -0.655 | 3.853 | 4.508 |
| 0.919 | 0.957 | -5.710 | -0.024 | 2.187 | 2.211 |
| 0.698 | 0.820 | -5.644 | 0.076  | 4.518 | 4.442 |
| 0.490 | 0.664 | -5.489 | -0.332 | 1.989 | 2.320 |
| 0.818 | 0.897 | -5.690 | 0.104  | 2.316 | 2.213 |
| 0.353 | 0.548 | -5.307 | 0.230  | 6.278 | 6.048 |
| 0.007 | 0.157 | -2.303 | 0.776  | 7.132 | 6.356 |
| 0.333 | 0.529 | -5.272 | 0.228  | 4.673 | 4.445 |
| 0.060 | 0.221 | -4.047 | 0.446  | 5.888 | 5.442 |
| 0.149 | 0.334 | -4.733 | 0.299  | 9.416 | 9.117 |
| 0.123 | 0.304 | -4.596 | 0.365  | 6.905 | 6.541 |
| 0.745 | 0.852 | -5.665 | -0.098 | 2.671 | 2.769 |

|       |       |        |        |       |       |
|-------|-------|--------|--------|-------|-------|
| 0.259 | 0.456 | -5.112 | 0.258  | 3.970 | 3.712 |
| 0.015 | 0.160 | -2.942 | -0.980 | 3.411 | 4.391 |
| 0.108 | 0.286 | -4.495 | 0.509  | 3.242 | 2.733 |
| 0.441 | 0.625 | -5.434 | -0.451 | 5.479 | 5.931 |
| 0.044 | 0.201 | -3.819 | 1.045  | 4.243 | 3.198 |
| 0.040 | 0.194 | -3.737 | 1.607  | 8.321 | 6.713 |
| 0.008 | 0.157 | -2.445 | 1.699  | 5.605 | 3.907 |
| 0.431 | 0.616 | -5.421 | 0.175  | 6.667 | 6.492 |
| 0.038 | 0.192 | -3.705 | 1.038  | 6.306 | 5.267 |
| 0.282 | 0.480 | -5.168 | 0.291  | 3.358 | 3.067 |
| 0.207 | 0.402 | -4.963 | -0.335 | 2.380 | 2.715 |
| 0.180 | 0.371 | -4.867 | 0.291  | 7.482 | 7.191 |
| 0.475 | 0.653 | -5.473 | -0.384 | 3.723 | 4.107 |
| 0.908 | 0.950 | -5.708 | 0.035  | 1.667 | 1.632 |
| 0.549 | 0.710 | -5.545 | -0.256 | 3.189 | 3.445 |
| 0.139 | 0.323 | -4.683 | -0.763 | 3.037 | 3.800 |
| 0.169 | 0.360 | -4.824 | -0.492 | 4.563 | 5.055 |
| 0.128 | 0.309 | -4.623 | 0.589  | 4.470 | 3.880 |
| 0.580 | 0.735 | -5.570 | -0.162 | 5.244 | 5.406 |
| 0.254 | 0.451 | -5.099 | -0.338 | 1.458 | 1.796 |
| 0.099 | 0.276 | -4.433 | 0.555  | 4.053 | 3.498 |
| 0.280 | 0.478 | -5.163 | 0.324  | 3.685 | 3.360 |
| 0.385 | 0.574 | -5.358 | 0.263  | 3.902 | 3.639 |
| 0.020 | 0.167 | -3.189 | 0.810  | 5.747 | 4.937 |
| 0.067 | 0.232 | -4.139 | 0.852  | 5.103 | 4.251 |
| 0.980 | 0.989 | -5.714 | -0.007 | 5.670 | 5.677 |
| 0.462 | 0.643 | -5.459 | 0.155  | 5.345 | 5.190 |
| 0.128 | 0.309 | -4.624 | -0.464 | 3.920 | 4.384 |
| 0.007 | 0.157 | -2.337 | 0.889  | 7.778 | 6.889 |
| 0.020 | 0.167 | -3.176 | -0.625 | 7.601 | 8.226 |
| 0.739 | 0.848 | -5.662 | -0.084 | 2.846 | 2.931 |
| 0.672 | 0.803 | -5.630 | -0.157 | 5.493 | 5.651 |
| 0.140 | 0.324 | -4.690 | -0.381 | 5.222 | 5.603 |
| 0.112 | 0.291 | -4.528 | 0.381  | 8.418 | 8.037 |
| 0.012 | 0.160 | -2.786 | 0.650  | 2.494 | 1.844 |
| 0.506 | 0.675 | -5.505 | -0.123 | 6.998 | 7.121 |
| 0.732 | 0.844 | -5.659 | 0.105  | 2.771 | 2.666 |
| 0.135 | 0.318 | -4.659 | -0.318 | 5.862 | 6.180 |
| 0.012 | 0.160 | -2.752 | 1.610  | 7.262 | 5.651 |
| 0.007 | 0.157 | -2.360 | -0.734 | 6.012 | 6.746 |
| 0.149 | 0.335 | -4.734 | -0.349 | 4.964 | 5.312 |
| 0.032 | 0.183 | -3.566 | -0.647 | 2.591 | 3.238 |
| 0.294 | 0.491 | -5.193 | 0.315  | 4.200 | 3.884 |
| 0.289 | 0.487 | -5.183 | -0.295 | 6.204 | 6.500 |
| 0.380 | 0.569 | -5.350 | -0.291 | 3.334 | 3.624 |
| 0.685 | 0.811 | -5.637 | 0.200  | 3.918 | 3.718 |
| 0.015 | 0.160 | -2.949 | 0.901  | 7.670 | 6.769 |
| 0.210 | 0.405 | -4.973 | 0.284  | 6.556 | 6.272 |
| 0.116 | 0.296 | -4.550 | 0.360  | 6.284 | 5.924 |
| 0.483 | 0.659 | -5.482 | 0.158  | 6.932 | 6.774 |



|       |       |        |        |       |       |
|-------|-------|--------|--------|-------|-------|
| 0.037 | 0.190 | -3.677 | 0.505  | 7.002 | 6.497 |
| 0.034 | 0.184 | -3.599 | -0.877 | 1.882 | 2.759 |
| 0.092 | 0.267 | -4.378 | 0.483  | 8.515 | 8.032 |
| 0.011 | 0.157 | -2.675 | -1.046 | 4.921 | 5.967 |
| 0.562 | 0.721 | -5.556 | -0.144 | 4.182 | 4.327 |
| 0.013 | 0.160 | -2.830 | 0.605  | 4.807 | 4.201 |
| 0.040 | 0.194 | -3.732 | -0.626 | 4.182 | 4.807 |
| 0.657 | 0.792 | -5.621 | 0.217  | 2.851 | 2.635 |
| 0.389 | 0.576 | -5.363 | -0.253 | 2.119 | 2.371 |
| 0.056 | 0.217 | -3.998 | 0.389  | 8.276 | 7.887 |
| 0.817 | 0.896 | -5.689 | 0.061  | 2.765 | 2.704 |
| 0.747 | 0.853 | -5.666 | 0.075  | 5.078 | 5.004 |
| 0.624 | 0.767 | -5.601 | -0.265 | 3.374 | 3.639 |
| 0.421 | 0.607 | -5.408 | -0.164 | 2.549 | 2.713 |
| 0.024 | 0.174 | -3.346 | 0.748  | 5.503 | 4.754 |
| 0.113 | 0.292 | -4.534 | -0.577 | 3.643 | 4.220 |
| 0.009 | 0.157 | -2.545 | 1.726  | 5.895 | 4.168 |
| 0.056 | 0.218 | -4.005 | -0.752 | 3.698 | 4.450 |
| 0.375 | 0.565 | -5.343 | 0.185  | 6.515 | 6.330 |
| 0.011 | 0.157 | -2.697 | 1.185  | 6.196 | 5.011 |
| 0.292 | 0.490 | -5.191 | -0.250 | 6.088 | 6.338 |
| 0.330 | 0.526 | -5.267 | -0.251 | 1.977 | 2.228 |
| 0.896 | 0.943 | -5.707 | -0.029 | 6.119 | 6.149 |
| 0.041 | 0.195 | -3.760 | -0.461 | 7.952 | 8.413 |
| 0.125 | 0.306 | -4.608 | 0.529  | 5.925 | 5.396 |
| 0.878 | 0.934 | -5.704 | -0.038 | 4.909 | 4.947 |
| 0.016 | 0.162 | -3.002 | 0.843  | 4.637 | 3.794 |
| 0.175 | 0.365 | -4.848 | 0.476  | 4.074 | 3.598 |
| 0.849 | 0.918 | -5.698 | -0.037 | 2.860 | 2.896 |
| 0.505 | 0.674 | -5.504 | -0.217 | 3.774 | 3.991 |
| 0.880 | 0.935 | -5.704 | 0.045  | 3.058 | 3.013 |
| 0.038 | 0.192 | -3.696 | -0.682 | 8.103 | 8.785 |
| 0.005 | 0.157 | -2.084 | -0.704 | 4.843 | 5.547 |
| 0.047 | 0.203 | -3.857 | 0.640  | 3.924 | 3.284 |
| 0.843 | 0.913 | -5.696 | -0.038 | 5.413 | 5.451 |
| 0.398 | 0.586 | -5.377 | -0.202 | 3.628 | 3.830 |
| 0.556 | 0.716 | -5.551 | 0.189  | 6.389 | 6.200 |
| 0.769 | 0.868 | -5.674 | 0.073  | 6.069 | 5.995 |
| 0.398 | 0.586 | -5.377 | -0.232 | 1.807 | 2.039 |
| 0.125 | 0.306 | -4.605 | -0.512 | 1.732 | 2.244 |
| 0.944 | 0.970 | -5.712 | 0.142  | 2.826 | 2.684 |
| 0.004 | 0.157 | -1.929 | 0.938  | 5.418 | 4.481 |
| 0.010 | 0.157 | -2.602 | 1.202  | 5.764 | 4.563 |
| 0.086 | 0.259 | -4.330 | 0.709  | 6.378 | 5.669 |
| 0.211 | 0.406 | -4.976 | 0.320  | 4.465 | 4.145 |
| 0.496 | 0.668 | -5.495 | 0.215  | 3.758 | 3.543 |
| 0.139 | 0.323 | -4.681 | 0.441  | 2.766 | 2.326 |
| 0.343 | 0.538 | -5.289 | -0.219 | 2.451 | 2.670 |
| 0.050 | 0.208 | -3.910 | 0.558  | 3.593 | 3.034 |
| 0.114 | 0.293 | -4.538 | -0.431 | 5.476 | 5.907 |

|       |       |        |        |        |       |
|-------|-------|--------|--------|--------|-------|
| 0.210 | 0.405 | -4.974 | 0.261  | 7.956  | 7.695 |
| 0.937 | 0.966 | -5.712 | -0.022 | 4.477  | 4.499 |
| 0.024 | 0.173 | -3.333 | 0.654  | 3.719  | 3.065 |
| 0.124 | 0.305 | -4.602 | -0.426 | 4.723  | 5.150 |
| 0.513 | 0.680 | -5.512 | -0.168 | 4.298  | 4.465 |
| 0.071 | 0.239 | -4.185 | -0.464 | 2.430  | 2.894 |
| 0.739 | 0.848 | -5.662 | 0.141  | 4.016  | 3.875 |
| 0.819 | 0.897 | -5.690 | -0.069 | 3.543  | 3.612 |
| 0.324 | 0.520 | -5.255 | 0.289  | 3.579  | 3.289 |
| 0.001 | 0.157 | -0.818 | -0.974 | 1.843  | 2.817 |
| 0.953 | 0.976 | -5.713 | -0.012 | 4.853  | 4.865 |
| 0.369 | 0.559 | -5.332 | 0.191  | 5.234  | 5.043 |
| 0.029 | 0.178 | -3.470 | -0.512 | 7.490  | 8.003 |
| 0.135 | 0.319 | -4.664 | 0.535  | 4.746  | 4.211 |
| 0.198 | 0.392 | -4.932 | 0.404  | 2.407  | 2.002 |
| 0.621 | 0.764 | -5.599 | 0.132  | 5.387  | 5.255 |
| 0.374 | 0.564 | -5.341 | -0.197 | 4.342  | 4.539 |
| 0.763 | 0.864 | -5.672 | -0.067 | 7.002  | 7.069 |
| 0.529 | 0.693 | -5.527 | 0.134  | 7.850  | 7.716 |
| 0.207 | 0.402 | -4.964 | 0.379  | 4.910  | 4.531 |
| 0.402 | 0.590 | -5.383 | 0.210  | 3.693  | 3.482 |
| 0.188 | 0.380 | -4.896 | -0.526 | 2.877  | 3.403 |
| 0.339 | 0.534 | -5.283 | -0.258 | 2.730  | 2.988 |
| 0.927 | 0.960 | -5.711 | 0.035  | 3.957  | 3.922 |
| 0.135 | 0.319 | -4.663 | 0.459  | 4.433  | 3.974 |
| 0.739 | 0.848 | -5.662 | 0.075  | 8.041  | 7.966 |
| 0.083 | 0.255 | -4.304 | 0.470  | 4.769  | 4.299 |
| 0.346 | 0.541 | -5.294 | 0.217  | 6.869  | 6.652 |
| 0.124 | 0.305 | -4.603 | 0.321  | 7.431  | 7.109 |
| 0.074 | 0.242 | -4.216 | 0.582  | 10.385 | 9.803 |
| 0.080 | 0.250 | -4.269 | 0.474  | 5.437  | 4.962 |
| 0.553 | 0.713 | -5.548 | -0.182 | 2.997  | 3.180 |
| 0.676 | 0.805 | -5.632 | 0.094  | 6.214  | 6.120 |
| 0.897 | 0.943 | -5.707 | -0.034 | 4.930  | 4.965 |
| 0.014 | 0.160 | -2.913 | 1.724  | 5.056  | 3.332 |
| 0.029 | 0.178 | -3.485 | -0.492 | 4.055  | 4.546 |
| 0.034 | 0.184 | -3.600 | 1.022  | 4.526  | 3.504 |
| 0.019 | 0.165 | -3.151 | -0.609 | 2.893  | 3.501 |
| 0.212 | 0.407 | -4.979 | -0.557 | 2.747  | 3.303 |
| 0.750 | 0.855 | -5.667 | 0.111  | 5.786  | 5.675 |
| 0.015 | 0.160 | -2.942 | 0.651  | 7.107  | 6.456 |
| 0.011 | 0.157 | -2.691 | -0.800 | 5.605  | 6.405 |
| 0.658 | 0.793 | -5.622 | 0.198  | 4.242  | 4.044 |
| 0.874 | 0.932 | -5.703 | 0.036  | 6.027  | 5.991 |
| 0.027 | 0.177 | -3.438 | 0.480  | 5.394  | 4.914 |
| 0.027 | 0.176 | -3.417 | -0.618 | 5.285  | 5.902 |
| 0.500 | 0.671 | -5.500 | -0.176 | 4.612  | 4.788 |
| 0.445 | 0.628 | -5.439 | -0.251 | 3.395  | 3.646 |
| 0.907 | 0.950 | -5.708 | 0.023  | 7.327  | 7.304 |
| 0.172 | 0.362 | -4.834 | 0.306  | 5.619  | 5.313 |

|       |       |        |        |       |       |
|-------|-------|--------|--------|-------|-------|
| 0.027 | 0.176 | -3.415 | -0.586 | 4.021 | 4.607 |
| 0.621 | 0.765 | -5.599 | 0.129  | 3.707 | 3.577 |
| 0.205 | 0.400 | -4.955 | 0.318  | 4.138 | 3.821 |
| 0.095 | 0.271 | -4.405 | 0.411  | 7.139 | 6.728 |
| 0.372 | 0.562 | -5.338 | -0.208 | 3.487 | 3.695 |
| 0.048 | 0.205 | -3.883 | 0.550  | 6.183 | 5.632 |
| 0.844 | 0.914 | -5.696 | 0.058  | 5.465 | 5.408 |
| 0.159 | 0.348 | -4.780 | -0.404 | 6.054 | 6.458 |
| 0.700 | 0.821 | -5.645 | 0.229  | 5.488 | 5.259 |
| 0.025 | 0.175 | -3.376 | -0.633 | 6.054 | 6.686 |
| 0.366 | 0.557 | -5.328 | -0.216 | 3.956 | 4.172 |
| 0.038 | 0.192 | -3.704 | 0.640  | 6.926 | 6.286 |
| 0.029 | 0.178 | -3.494 | -0.773 | 3.421 | 4.194 |
| 0.362 | 0.554 | -5.321 | -0.246 | 3.269 | 3.515 |
| 0.500 | 0.671 | -5.499 | 0.188  | 5.134 | 4.946 |
| 0.002 | 0.157 | -1.412 | -0.771 | 5.851 | 6.622 |
| 0.003 | 0.157 | -1.642 | -1.087 | 6.379 | 7.465 |
| 0.077 | 0.246 | -4.243 | -0.762 | 3.523 | 4.285 |
| 0.050 | 0.207 | -3.906 | 0.517  | 7.381 | 6.864 |
| 0.038 | 0.191 | -3.686 | 0.580  | 4.872 | 4.292 |
| 0.036 | 0.189 | -3.661 | 0.989  | 4.800 | 3.811 |
| 0.199 | 0.394 | -4.936 | 0.402  | 3.595 | 3.192 |
| 0.021 | 0.169 | -3.235 | -0.694 | 7.858 | 8.551 |
| 0.381 | 0.570 | -5.352 | -0.228 | 2.374 | 2.602 |
| 0.059 | 0.221 | -4.040 | 0.403  | 8.084 | 7.681 |
| 0.080 | 0.250 | -4.271 | 0.394  | 5.734 | 5.340 |
| 0.168 | 0.358 | -4.817 | -0.271 | 6.517 | 6.788 |
| 0.118 | 0.298 | -4.566 | -0.409 | 4.977 | 5.386 |
| 0.357 | 0.551 | -5.313 | 0.236  | 6.736 | 6.501 |
| 0.367 | 0.558 | -5.331 | -0.256 | 4.469 | 4.725 |
| 0.938 | 0.967 | -5.712 | 0.018  | 4.494 | 4.476 |
| 0.084 | 0.256 | -4.306 | 0.811  | 7.463 | 6.653 |
| 0.098 | 0.275 | -4.427 | -0.405 | 3.607 | 4.012 |
| 0.778 | 0.872 | -5.677 | 0.103  | 5.594 | 5.491 |
| 0.012 | 0.160 | -2.786 | 1.057  | 5.553 | 4.497 |
| 0.486 | 0.662 | -5.485 | 0.168  | 5.463 | 5.296 |
| 0.062 | 0.225 | -4.079 | 0.516  | 4.207 | 3.690 |
| 0.024 | 0.173 | -3.327 | 0.731  | 3.913 | 3.182 |
| 0.565 | 0.722 | -5.558 | 0.261  | 3.270 | 3.009 |
| 0.130 | 0.312 | -4.636 | -0.530 | 6.483 | 7.013 |
| 0.250 | 0.447 | -5.089 | 0.333  | 2.949 | 2.616 |
| 0.292 | 0.490 | -5.190 | 0.323  | 3.217 | 2.894 |
| 0.034 | 0.185 | -3.612 | 0.529  | 7.633 | 7.104 |
| 0.073 | 0.241 | -4.208 | -0.547 | 5.252 | 5.799 |
| 0.112 | 0.290 | -4.524 | 0.503  | 5.305 | 4.802 |
| 0.606 | 0.753 | -5.589 | 0.140  | 4.188 | 4.048 |
| 0.138 | 0.322 | -4.679 | 0.418  | 5.028 | 4.611 |
| 0.255 | 0.452 | -5.102 | 0.273  | 4.273 | 4.000 |
| 0.928 | 0.961 | -5.711 | 0.019  | 5.314 | 5.295 |
| 0.627 | 0.768 | -5.603 | 0.155  | 4.478 | 4.324 |

|       |       |        |        |       |       |
|-------|-------|--------|--------|-------|-------|
| 0.151 | 0.337 | -4.741 | -0.575 | 5.324 | 5.899 |
| 0.198 | 0.392 | -4.932 | 0.257  | 7.795 | 7.537 |
| 0.012 | 0.160 | -2.786 | 1.074  | 6.545 | 5.471 |
| 0.729 | 0.841 | -5.658 | -0.094 | 5.652 | 5.747 |
| 0.872 | 0.930 | -5.702 | 0.049  | 2.207 | 2.157 |
| 0.291 | 0.489 | -5.187 | -0.238 | 2.463 | 2.700 |
| 0.502 | 0.672 | -5.502 | -0.135 | 6.717 | 6.851 |
| 0.444 | 0.627 | -5.438 | 0.220  | 5.501 | 5.281 |
| 0.244 | 0.442 | -5.075 | 0.347  | 4.097 | 3.750 |
| 0.098 | 0.275 | -4.429 | -0.463 | 4.511 | 4.974 |
| 0.479 | 0.655 | -5.477 | -0.169 | 4.007 | 4.176 |
| 0.250 | 0.448 | -5.090 | 0.249  | 6.024 | 5.775 |
| 0.139 | 0.323 | -4.683 | -0.356 | 6.274 | 6.630 |
| 0.924 | 0.959 | -5.711 | -0.025 | 4.529 | 4.555 |
| 0.072 | 0.239 | -4.188 | 0.599  | 3.747 | 3.148 |
| 0.175 | 0.365 | -4.848 | 0.343  | 4.816 | 4.472 |
| 0.637 | 0.777 | -5.610 | 0.124  | 4.943 | 4.818 |
| 0.100 | 0.277 | -4.438 | 0.514  | 6.444 | 5.930 |
| 0.394 | 0.582 | -5.372 | 0.219  | 3.164 | 2.945 |
| 0.607 | 0.754 | -5.589 | -0.120 | 5.955 | 6.075 |
| 0.771 | 0.868 | -5.675 | -0.098 | 4.380 | 4.478 |
| 0.620 | 0.763 | -5.598 | 0.115  | 3.693 | 3.579 |
| 0.024 | 0.173 | -3.321 | 1.059  | 4.475 | 3.416 |
| 0.322 | 0.519 | -5.251 | -0.474 | 2.612 | 3.086 |
| 0.065 | 0.229 | -4.113 | 0.560  | 2.705 | 2.146 |
| 0.874 | 0.932 | -5.703 | -0.038 | 3.557 | 3.595 |
| 0.440 | 0.624 | -5.433 | -0.210 | 3.101 | 3.311 |
| 0.190 | 0.383 | -4.906 | 0.361  | 4.603 | 4.242 |
| 0.520 | 0.687 | -5.519 | -0.194 | 4.327 | 4.521 |
| 0.737 | 0.847 | -5.661 | 0.080  | 3.800 | 3.720 |
| 0.812 | 0.894 | -5.688 | -0.060 | 5.256 | 5.316 |
| 0.688 | 0.813 | -5.638 | -0.120 | 4.359 | 4.479 |
| 0.530 | 0.694 | -5.528 | 0.167  | 4.336 | 4.169 |
| 0.106 | 0.285 | -4.487 | 0.566  | 3.665 | 3.099 |
| 0.528 | 0.693 | -5.527 | 0.202  | 3.314 | 3.112 |
| 0.213 | 0.408 | -4.982 | 0.326  | 2.574 | 2.247 |
| 0.964 | 0.982 | -5.714 | -0.012 | 4.389 | 4.400 |
| 0.868 | 0.928 | -5.702 | 0.049  | 3.284 | 3.236 |
| 0.594 | 0.745 | -5.580 | 0.126  | 6.294 | 6.169 |
| 0.023 | 0.172 | -3.284 | 0.702  | 8.648 | 7.946 |
| 0.795 | 0.884 | -5.683 | -0.067 | 4.745 | 4.811 |
| 0.318 | 0.516 | -5.244 | 0.282  | 4.417 | 4.135 |
| 0.670 | 0.802 | -5.629 | 0.138  | 4.457 | 4.319 |
| 0.680 | 0.808 | -5.634 | -0.095 | 3.170 | 3.264 |
| 0.124 | 0.305 | -4.600 | -0.368 | 4.039 | 4.406 |
| 0.258 | 0.456 | -5.111 | 0.358  | 5.843 | 5.484 |
| 0.511 | 0.680 | -5.511 | 0.186  | 6.043 | 5.858 |
| 0.033 | 0.184 | -3.594 | -0.638 | 4.781 | 5.419 |
| 0.613 | 0.758 | -5.594 | -0.126 | 2.531 | 2.656 |
| 0.975 | 0.987 | -5.714 | -0.009 | 3.085 | 3.094 |

|       |       |        |        |       |       |
|-------|-------|--------|--------|-------|-------|
| 0.866 | 0.928 | -5.701 | 0.061  | 4.554 | 4.493 |
| 0.752 | 0.857 | -5.668 | 0.105  | 3.168 | 3.063 |
| 0.006 | 0.157 | -2.163 | -0.751 | 3.516 | 4.266 |
| 0.985 | 0.992 | -5.715 | 0.005  | 2.915 | 2.911 |
| 0.531 | 0.695 | -5.529 | -0.159 | 5.865 | 6.024 |
| 0.146 | 0.330 | -4.718 | 0.369  | 4.908 | 4.539 |
| 0.502 | 0.672 | -5.501 | -0.187 | 1.913 | 2.100 |
| 0.943 | 0.970 | -5.712 | 0.019  | 4.412 | 4.393 |
| 0.935 | 0.965 | -5.712 | 0.018  | 4.831 | 4.813 |
| 0.940 | 0.967 | -5.712 | -0.023 | 3.308 | 3.331 |
| 0.025 | 0.175 | -3.374 | -0.538 | 6.130 | 6.668 |
| 0.208 | 0.403 | -4.968 | 0.289  | 4.305 | 4.016 |
| 0.263 | 0.461 | -5.122 | 0.372  | 3.572 | 3.200 |
| 0.174 | 0.364 | -4.843 | -0.342 | 3.804 | 4.146 |
| 0.128 | 0.309 | -4.623 | 0.456  | 2.721 | 2.265 |
| 0.572 | 0.727 | -5.563 | 0.142  | 4.281 | 4.139 |
| 0.508 | 0.677 | -5.507 | -0.173 | 2.792 | 2.965 |
| 0.154 | 0.341 | -4.755 | 0.310  | 3.438 | 3.128 |
| 0.119 | 0.298 | -4.567 | 0.355  | 6.284 | 5.929 |
| 0.060 | 0.221 | -4.048 | 0.452  | 4.938 | 4.487 |
| 0.234 | 0.430 | -5.045 | 0.297  | 4.715 | 4.418 |
| 0.612 | 0.757 | -5.593 | 0.114  | 6.267 | 6.153 |
| 0.009 | 0.157 | -2.577 | 1.531  | 5.636 | 4.105 |
| 0.611 | 0.757 | -5.593 | 0.147  | 2.812 | 2.665 |
| 0.512 | 0.680 | -5.511 | 0.196  | 4.009 | 3.813 |
| 0.814 | 0.895 | -5.689 | -0.063 | 4.031 | 4.095 |
| 0.117 | 0.298 | -4.560 | -0.431 | 4.893 | 5.324 |
| 0.892 | 0.941 | -5.706 | 0.038  | 3.495 | 3.456 |
| 0.490 | 0.664 | -5.489 | -0.167 | 5.223 | 5.391 |
| 0.066 | 0.231 | -4.130 | -0.434 | 4.179 | 4.613 |
| 0.105 | 0.282 | -4.475 | 0.418  | 3.997 | 3.580 |
| 0.469 | 0.648 | -5.466 | -0.146 | 5.556 | 5.702 |
| 0.376 | 0.566 | -5.345 | 0.247  | 6.335 | 6.087 |
| 0.687 | 0.812 | -5.638 | -0.132 | 4.716 | 4.848 |
| 0.360 | 0.552 | -5.318 | 0.266  | 5.419 | 5.153 |
| 0.151 | 0.338 | -4.743 | 0.405  | 5.528 | 5.122 |
| 0.501 | 0.671 | -5.500 | 0.180  | 4.399 | 4.219 |
| 0.538 | 0.701 | -5.536 | 0.216  | 2.789 | 2.573 |
| 0.273 | 0.471 | -5.148 | 0.381  | 4.963 | 4.581 |
| 0.318 | 0.516 | -5.244 | -0.248 | 6.205 | 6.453 |
| 0.178 | 0.369 | -4.859 | 0.341  | 5.490 | 5.149 |
| 0.086 | 0.258 | -4.326 | 0.396  | 4.036 | 3.640 |
| 0.004 | 0.157 | -1.888 | -0.819 | 5.560 | 6.379 |
| 0.570 | 0.726 | -5.562 | 0.169  | 5.575 | 5.406 |
| 0.585 | 0.739 | -5.574 | 0.142  | 2.622 | 2.480 |
| 0.213 | 0.408 | -4.982 | -0.413 | 4.578 | 4.992 |
| 0.103 | 0.280 | -4.460 | 0.438  | 6.645 | 6.207 |
| 0.256 | 0.453 | -5.105 | -0.391 | 3.268 | 3.659 |
| 0.092 | 0.267 | -4.380 | 0.546  | 4.919 | 4.373 |
| 0.081 | 0.253 | -4.286 | -0.634 | 3.547 | 4.181 |

|       |       |        |        |       |       |
|-------|-------|--------|--------|-------|-------|
| 0.118 | 0.298 | -4.561 | -0.535 | 3.198 | 3.733 |
| 0.707 | 0.826 | -5.648 | 0.091  | 3.301 | 3.210 |
| 0.337 | 0.533 | -5.279 | 0.175  | 5.647 | 5.472 |
| 0.774 | 0.870 | -5.676 | 0.060  | 6.769 | 6.709 |
| 0.202 | 0.397 | -4.946 | -0.391 | 4.989 | 5.380 |
| 0.775 | 0.871 | -5.676 | 0.068  | 5.302 | 5.234 |
| 0.017 | 0.162 | -3.056 | 0.762  | 5.200 | 4.439 |
| 0.018 | 0.162 | -3.084 | -0.614 | 5.068 | 5.682 |
| 0.736 | 0.846 | -5.661 | 0.089  | 3.074 | 2.984 |
| 0.668 | 0.799 | -5.627 | 0.122  | 2.643 | 2.521 |
| 0.024 | 0.173 | -3.331 | -0.927 | 5.776 | 6.703 |
| 0.654 | 0.789 | -5.619 | 0.092  | 4.287 | 4.195 |
| 0.951 | 0.975 | -5.713 | 0.015  | 5.041 | 5.026 |
| 0.841 | 0.912 | -5.696 | -0.063 | 3.990 | 4.053 |
| 0.003 | 0.157 | -1.703 | 0.843  | 4.960 | 4.116 |
| 0.742 | 0.850 | -5.663 | -0.098 | 4.463 | 4.562 |
| 0.204 | 0.398 | -4.951 | 0.315  | 4.599 | 4.285 |
| 0.527 | 0.693 | -5.526 | 0.250  | 2.706 | 2.456 |
| 0.125 | 0.306 | -4.604 | 0.401  | 4.576 | 4.175 |
| 0.338 | 0.534 | -5.281 | -0.251 | 4.098 | 4.348 |
| 0.784 | 0.877 | -5.679 | -0.084 | 3.409 | 3.493 |
| 0.223 | 0.419 | -5.013 | -0.388 | 2.510 | 2.898 |
| 0.519 | 0.686 | -5.518 | -0.213 | 3.978 | 4.190 |
| 0.367 | 0.558 | -5.330 | 0.226  | 4.159 | 3.933 |
| 0.528 | 0.693 | -5.527 | 0.134  | 3.670 | 3.537 |
| 0.261 | 0.458 | -5.117 | 0.317  | 4.693 | 4.376 |
| 0.537 | 0.700 | -5.535 | -0.163 | 3.879 | 4.043 |
| 0.394 | 0.581 | -5.371 | -0.234 | 5.038 | 5.272 |
| 0.567 | 0.724 | -5.560 | -0.149 | 2.414 | 2.563 |
| 0.868 | 0.928 | -5.702 | -0.037 | 5.641 | 5.679 |
| 0.570 | 0.725 | -5.562 | -0.131 | 5.301 | 5.432 |
| 0.453 | 0.634 | -5.449 | 0.178  | 4.496 | 4.319 |
| 0.269 | 0.467 | -5.137 | 0.343  | 4.173 | 3.830 |
| 0.312 | 0.509 | -5.231 | 0.251  | 4.766 | 4.515 |
| 0.540 | 0.702 | -5.537 | 0.180  | 3.079 | 2.900 |
| 0.959 | 0.979 | -5.714 | 0.013  | 3.932 | 3.919 |
| 0.179 | 0.369 | -4.861 | 0.322  | 4.417 | 4.096 |
| 0.776 | 0.871 | -5.676 | -0.111 | 4.559 | 4.670 |
| 0.175 | 0.364 | -4.845 | -0.368 | 4.435 | 4.803 |
| 0.009 | 0.157 | -2.564 | -0.818 | 6.388 | 7.205 |
| 0.075 | 0.243 | -4.220 | 0.496  | 5.796 | 5.300 |
| 0.321 | 0.518 | -5.248 | 0.214  | 5.156 | 4.942 |
| 0.732 | 0.843 | -5.659 | 0.075  | 7.859 | 7.784 |
| 0.156 | 0.344 | -4.765 | 0.393  | 4.360 | 3.968 |
| 0.789 | 0.880 | -5.681 | 0.070  | 3.794 | 3.724 |
| 0.001 | 0.157 | -0.613 | 1.013  | 3.640 | 2.627 |
| 0.013 | 0.160 | -2.818 | 0.722  | 4.811 | 4.089 |
| 0.320 | 0.517 | -5.246 | 0.264  | 3.479 | 3.215 |
| 0.011 | 0.159 | -2.719 | -0.697 | 2.321 | 3.018 |
| 0.102 | 0.280 | -4.458 | -0.462 | 2.838 | 3.300 |

|       |       |        |        |       |       |
|-------|-------|--------|--------|-------|-------|
| 0.112 | 0.291 | -4.526 | 0.414  | 4.038 | 3.623 |
| 0.639 | 0.778 | -5.610 | 0.124  | 4.180 | 4.055 |
| 0.105 | 0.282 | -4.474 | 0.610  | 3.848 | 3.237 |
| 0.381 | 0.570 | -5.351 | -0.361 | 4.474 | 4.835 |
| 0.049 | 0.207 | -3.899 | -0.437 | 2.687 | 3.124 |
| 0.089 | 0.263 | -4.352 | 0.449  | 5.695 | 5.246 |
| 0.105 | 0.284 | -4.480 | 0.652  | 3.323 | 2.671 |
| 0.885 | 0.937 | -5.705 | -0.035 | 4.334 | 4.369 |
| 0.283 | 0.481 | -5.170 | 0.281  | 5.013 | 4.732 |
| 0.119 | 0.299 | -4.571 | 0.554  | 3.127 | 2.572 |
| 0.289 | 0.488 | -5.184 | -0.276 | 4.592 | 4.868 |
| 0.966 | 0.983 | -5.714 | 0.017  | 3.185 | 3.168 |
| 0.975 | 0.987 | -5.714 | -0.008 | 3.622 | 3.630 |
| 0.623 | 0.766 | -5.600 | -0.117 | 3.633 | 3.750 |
| 0.498 | 0.670 | -5.498 | -0.196 | 3.537 | 3.734 |
| 0.067 | 0.232 | -4.135 | 0.455  | 7.113 | 6.659 |
| 0.429 | 0.615 | -5.419 | 0.192  | 3.216 | 3.024 |
| 0.431 | 0.616 | -5.422 | 0.195  | 4.587 | 4.391 |
| 0.224 | 0.421 | -5.017 | 0.268  | 5.852 | 5.585 |
| 0.152 | 0.339 | -4.747 | 0.438  | 4.751 | 4.314 |
| 0.520 | 0.686 | -5.519 | 0.142  | 6.223 | 6.081 |
| 0.166 | 0.356 | -4.811 | -0.308 | 4.064 | 4.371 |
| 0.182 | 0.374 | -4.876 | -0.378 | 5.261 | 5.639 |
| 0.262 | 0.460 | -5.121 | 0.356  | 5.538 | 5.182 |
| 0.747 | 0.853 | -5.665 | -0.102 | 4.051 | 4.153 |
| 0.264 | 0.462 | -5.125 | -0.282 | 3.323 | 3.605 |
| 0.679 | 0.808 | -5.634 | 0.127  | 3.292 | 3.165 |
| 0.349 | 0.544 | -5.300 | 0.197  | 6.850 | 6.653 |
| 0.073 | 0.241 | -4.207 | 0.871  | 5.084 | 4.213 |
| 0.007 | 0.157 | -2.303 | 1.213  | 5.462 | 4.250 |
| 0.038 | 0.192 | -3.695 | -0.804 | 2.244 | 3.048 |
| 0.676 | 0.806 | -5.632 | -0.104 | 3.991 | 4.095 |
| 0.243 | 0.441 | -5.071 | 0.284  | 3.957 | 3.673 |
| 0.121 | 0.302 | -4.582 | 0.410  | 5.204 | 4.794 |
| 0.201 | 0.397 | -4.944 | -0.453 | 3.610 | 4.063 |
| 0.230 | 0.428 | -5.035 | 0.315  | 2.620 | 2.305 |
| 0.020 | 0.166 | -3.168 | -0.624 | 4.893 | 5.517 |
| 0.029 | 0.178 | -3.476 | 0.814  | 3.894 | 3.080 |
| 0.722 | 0.836 | -5.655 | -0.074 | 4.138 | 4.212 |
| 0.908 | 0.950 | -5.708 | -0.037 | 5.209 | 5.246 |
| 0.692 | 0.816 | -5.640 | -0.110 | 2.127 | 2.237 |
| 0.036 | 0.188 | -3.645 | -0.675 | 4.372 | 5.047 |
| 0.120 | 0.301 | -4.579 | -0.417 | 3.571 | 3.987 |
| 0.876 | 0.933 | -5.703 | -0.038 | 3.346 | 3.385 |
| 0.059 | 0.221 | -4.037 | 0.556  | 6.223 | 5.667 |
| 0.079 | 0.249 | -4.263 | 0.578  | 3.950 | 3.372 |
| 0.655 | 0.791 | -5.620 | 0.122  | 4.155 | 4.033 |
| 0.812 | 0.894 | -5.688 | -0.058 | 4.243 | 4.301 |
| 0.691 | 0.815 | -5.640 | 0.113  | 3.750 | 3.638 |
| 0.445 | 0.627 | -5.438 | 0.170  | 4.129 | 3.959 |

|       |       |        |        |       |       |
|-------|-------|--------|--------|-------|-------|
| 0.282 | 0.480 | -5.168 | 0.263  | 3.574 | 3.311 |
| 0.015 | 0.160 | -2.943 | -0.858 | 3.049 | 3.907 |
| 0.712 | 0.828 | -5.650 | -0.109 | 2.988 | 3.097 |
| 0.918 | 0.956 | -5.710 | 0.028  | 3.627 | 3.599 |
| 0.693 | 0.816 | -5.641 | -0.107 | 4.042 | 4.149 |
| 0.375 | 0.565 | -5.342 | -0.263 | 3.887 | 4.150 |
| 0.421 | 0.607 | -5.408 | -0.179 | 3.968 | 4.147 |
| 0.022 | 0.169 | -3.242 | -0.560 | 3.409 | 3.969 |
| 0.471 | 0.650 | -5.469 | 0.164  | 4.791 | 4.626 |
| 0.051 | 0.210 | -3.931 | 0.745  | 4.345 | 3.601 |
| 0.930 | 0.962 | -5.711 | -0.023 | 4.154 | 4.177 |
| 0.499 | 0.670 | -5.499 | -0.172 | 6.316 | 6.488 |
| 0.017 | 0.162 | -3.070 | 0.590  | 8.922 | 8.331 |



| 19.ALS.FC.M | 20.ALS.FC.F | 21.ALS.FC.M | 23.ALS.FC.M | 24.ALS.FC.F | 13.CTL.FC.F |
|-------------|-------------|-------------|-------------|-------------|-------------|
| 3.833       | 3.324       | 4.189       | 3.802       | 4.066       | 4.149       |
| 7.304       | 7.382       | 7.634       | 7.271       | 7.231       | 8.253       |
| 4.420       | 3.203       | 4.035       | 4.224       | 4.047       | 4.737       |
| 3.194       | 1.998       | 2.359       | 2.668       | 2.310       | 3.170       |
| 6.542       | 6.145       | 6.377       | 6.310       | 6.207       | 5.063       |
| 3.758       | 4.805       | 4.293       | 4.307       | 4.203       | 3.449       |
| 5.082       | 5.395       | 4.974       | 5.181       | 5.040       | 4.539       |
| 8.278       | 8.043       | 8.138       | 8.061       | 8.148       | 6.900       |
| 6.511       | 6.487       | 6.573       | 6.762       | 6.593       | 5.427       |
| 6.204       | 6.382       | 5.705       | 6.322       | 6.314       | 7.850       |
| 5.362       | 5.868       | 5.570       | 5.785       | 5.979       | 6.451       |
| 4.640       | 3.965       | 4.365       | 4.720       | 4.587       | 6.894       |
| 2.698       | 2.514       | 2.678       | 3.390       | 2.841       | 2.226       |
| 3.108       | 2.270       | 2.661       | 2.901       | 2.844       | 2.063       |
| 7.968       | 8.144       | 7.916       | 8.301       | 8.483       | 9.797       |
| 7.014       | 6.771       | 7.161       | 7.177       | 6.644       | 6.680       |
| 4.094       | 3.848       | 4.037       | 5.000       | 4.549       | 7.651       |
| 5.420       | 5.037       | 5.543       | 6.359       | 5.843       | 8.218       |
| 5.518       | 4.465       | 4.442       | 5.566       | 5.124       | 6.466       |
| 4.787       | 5.140       | 5.338       | 5.256       | 5.183       | 5.643       |
| 1.278       | 2.585       | 2.147       | 1.918       | 1.818       | 1.554       |
| 1.670       | 1.944       | 2.412       | 2.262       | 2.289       | 4.407       |
| 4.615       | 4.516       | 4.161       | 4.522       | 4.614       | 5.553       |
| 6.965       | 6.772       | 6.743       | 6.733       | 6.712       | 6.028       |
| 4.952       | 5.029       | 4.965       | 4.829       | 4.927       | 4.947       |
| 6.423       | 7.311       | 6.981       | 6.311       | 6.242       | 6.358       |
| 6.123       | 6.364       | 6.304       | 6.411       | 6.603       | 4.821       |
| 4.666       | 4.511       | 3.937       | 4.104       | 4.224       | 4.693       |
| 5.889       | 5.589       | 5.779       | 5.838       | 5.828       | 5.767       |
| 4.858       | 5.980       | 5.817       | 5.583       | 5.403       | 6.188       |
| 5.537       | 5.778       | 5.707       | 5.397       | 5.767       | 4.067       |
| 4.208       | 4.556       | 4.331       | 4.217       | 4.671       | 2.584       |
| 6.273       | 6.214       | 6.456       | 6.200       | 6.275       | 5.220       |
| 3.009       | 2.779       | 2.756       | 3.383       | 2.721       | 4.306       |
| 2.369       | 2.095       | 2.045       | 2.166       | 2.317       | 2.337       |
| 2.925       | 3.110       | 2.858       | 2.545       | 3.061       | 2.514       |
| 5.911       | 6.707       | 6.206       | 6.492       | 6.614       | 6.625       |
| 4.169       | 4.532       | 4.351       | 3.678       | 4.254       | 5.200       |
| 5.087       | 5.599       | 4.962       | 5.005       | 4.941       | 6.081       |
| 4.259       | 4.175       | 4.245       | 4.369       | 4.624       | 5.291       |
| 6.871       | 6.883       | 6.972       | 6.617       | 6.944       | 5.067       |
| 3.203       | 3.938       | 3.857       | 3.917       | 3.847       | 4.550       |
| 4.887       | 3.236       | 3.365       | 3.910       | 4.438       | 6.213       |
| 6.746       | 6.676       | 6.550       | 6.717       | 6.702       | 7.360       |
| 6.590       | 6.395       | 6.408       | 6.145       | 6.531       | 4.855       |
| 5.862       | 5.671       | 5.729       | 6.074       | 5.972       | 6.586       |
| 3.108       | 4.064       | 4.270       | 3.998       | 3.700       | 2.420       |
| 4.358       | 4.375       | 4.672       | 4.385       | 4.667       | 4.270       |
| 4.426       | 4.298       | 4.033       | 4.527       | 4.460       | 3.627       |

|       |       |       |       |       |       |
|-------|-------|-------|-------|-------|-------|
| 4.743 | 4.342 | 4.750 | 4.268 | 5.142 | 6.838 |
| 3.292 | 4.194 | 3.670 | 4.613 | 4.575 | 5.003 |
| 3.732 | 3.511 | 3.162 | 4.026 | 3.542 | 3.932 |
| 2.630 | 2.820 | 2.573 | 2.034 | 2.032 | 2.519 |
| 4.207 | 3.506 | 3.981 | 4.075 | 3.656 | 3.140 |
| 3.008 | 3.453 | 3.559 | 3.475 | 2.813 | 2.975 |
| 5.078 | 4.885 | 4.504 | 5.348 | 5.341 | 5.765 |
| 1.681 | 2.149 | 2.235 | 1.914 | 1.722 | 3.052 |
| 1.479 | 1.830 | 1.637 | 1.707 | 1.513 | 2.163 |
| 5.028 | 3.647 | 3.970 | 4.060 | 4.353 | 5.809 |
| 4.454 | 3.767 | 3.113 | 4.007 | 3.394 | 4.177 |
| 4.904 | 4.813 | 5.003 | 4.862 | 5.116 | 4.091 |
| 3.370 | 3.297 | 3.483 | 3.375 | 3.685 | 4.486 |
| 2.438 | 2.436 | 2.602 | 2.355 | 2.882 | 2.752 |
| 4.113 | 3.648 | 3.219 | 4.319 | 4.712 | 4.910 |
| 2.850 | 4.023 | 3.409 | 2.382 | 3.573 | 1.793 |
| 1.907 | 1.698 | 1.639 | 2.013 | 1.545 | 2.645 |
| 2.765 | 3.421 | 2.692 | 2.980 | 2.917 | 3.183 |
| 5.982 | 5.528 | 5.738 | 6.197 | 5.285 | 4.475 |
| 3.609 | 3.684 | 3.304 | 3.369 | 4.143 | 4.475 |
| 2.261 | 1.826 | 2.568 | 2.444 | 2.337 | 3.382 |
| 3.356 | 3.727 | 3.425 | 2.365 | 3.529 | 2.926 |
| 2.336 | 1.894 | 2.093 | 2.065 | 1.886 | 2.673 |
| 1.357 | 1.034 | 1.626 | 0.966 | 0.777 | 4.004 |
| 3.137 | 3.138 | 2.706 | 3.974 | 3.644 | 2.680 |
| 1.652 | 1.711 | 2.183 | 1.889 | 2.242 | 2.305 |
| 3.594 | 3.161 | 3.646 | 4.149 | 3.037 | 2.912 |
| 3.213 | 2.429 | 2.912 | 3.323 | 2.761 | 2.060 |
| 2.683 | 1.927 | 1.504 | 2.011 | 1.949 | 1.619 |
| 4.303 | 3.201 | 4.414 | 3.968 | 4.097 | 2.847 |
| 1.454 | 2.051 | 1.752 | 1.665 | 1.510 | 3.453 |
| 4.587 | 3.989 | 4.763 | 4.778 | 4.180 | 2.372 |
| 3.701 | 3.862 | 2.974 | 3.804 | 3.770 | 3.088 |
| 2.766 | 2.339 | 2.420 | 3.028 | 2.794 | 2.871 |
| 3.286 | 2.893 | 2.713 | 2.384 | 2.628 | 2.274 |
| 1.010 | 1.879 | 1.375 | 2.038 | 2.951 | 3.570 |
| 4.801 | 5.802 | 5.487 | 4.911 | 4.145 | 5.916 |
| 3.701 | 4.285 | 4.039 | 5.070 | 3.425 | 4.168 |
| 2.781 | 2.561 | 2.248 | 2.947 | 2.377 | 1.733 |
| 3.348 | 3.252 | 2.972 | 3.616 | 2.986 | 2.238 |
| 2.483 | 2.451 | 1.922 | 2.521 | 3.147 | 2.699 |
| 1.529 | 1.228 | 1.912 | 1.973 | 2.355 | 2.804 |
| 2.226 | 2.106 | 1.696 | 2.636 | 2.904 | 5.822 |
| 2.965 | 2.706 | 3.213 | 3.451 | 2.428 | 2.301 |
| 1.902 | 1.777 | 3.128 | 1.734 | 1.847 | 2.497 |
| 2.205 | 3.839 | 2.150 | 3.133 | 2.753 | 1.782 |
| 4.379 | 3.729 | 3.231 | 3.415 | 3.524 | 2.977 |
| 4.398 | 3.334 | 4.278 | 4.429 | 4.026 | 1.766 |
| 3.215 | 2.542 | 3.013 | 3.139 | 3.207 | 2.212 |
| 4.139 | 4.850 | 5.081 | 2.520 | 4.568 | 1.585 |

|       |       |       |       |       |       |
|-------|-------|-------|-------|-------|-------|
| 3.986 | 3.680 | 3.479 | 3.684 | 3.955 | 3.460 |
| 1.878 | 2.343 | 2.528 | 1.738 | 1.842 | 1.953 |
| 3.617 | 3.370 | 3.375 | 2.759 | 3.363 | 4.123 |
| 2.828 | 2.618 | 2.299 | 2.622 | 2.573 | 2.573 |
| 3.374 | 2.708 | 3.409 | 3.292 | 2.437 | 1.529 |
| 2.712 | 3.356 | 4.002 | 2.623 | 3.462 | 3.339 |
| 4.119 | 4.183 | 4.645 | 4.610 | 5.096 | 2.731 |
| 3.281 | 2.308 | 2.533 | 2.002 | 2.579 | 3.289 |
| 2.333 | 3.079 | 2.829 | 2.439 | 2.670 | 2.246 |
| 4.401 | 3.715 | 4.082 | 4.220 | 3.592 | 2.801 |
| 2.235 | 2.023 | 2.822 | 2.754 | 2.807 | 2.849 |
| 2.819 | 2.950 | 2.295 | 2.699 | 2.602 | 2.369 |
| 2.046 | 2.945 | 2.850 | 2.803 | 3.031 | 1.634 |
| 6.087 | 6.345 | 5.481 | 5.841 | 5.935 | 5.419 |
| 1.463 | 2.460 | 2.226 | 2.661 | 2.310 | 3.371 |
| 4.955 | 3.555 | 3.445 | 3.578 | 4.137 | 4.617 |
| 3.172 | 2.791 | 2.556 | 2.744 | 2.884 | 3.516 |
| 3.228 | 2.909 | 3.009 | 3.767 | 2.137 | 3.271 |
| 2.253 | 2.826 | 2.587 | 2.827 | 2.766 | 2.133 |
| 4.195 | 4.843 | 4.738 | 4.286 | 4.084 | 1.587 |
| 1.865 | 2.269 | 2.386 | 2.173 | 2.224 | 3.409 |
| 5.588 | 5.539 | 5.679 | 5.523 | 5.626 | 5.642 |
| 2.409 | 3.225 | 2.308 | 2.945 | 3.225 | 4.078 |
| 5.349 | 5.170 | 5.462 | 5.629 | 5.603 | 6.210 |
| 3.015 | 2.644 | 2.937 | 2.871 | 2.559 | 0.944 |
| 1.767 | 2.436 | 1.570 | 1.763 | 1.925 | 2.148 |
| 3.665 | 2.192 | 2.543 | 2.142 | 1.969 | 2.047 |
| 2.767 | 2.346 | 2.258 | 3.628 | 1.318 | 4.626 |
| 2.940 | 3.579 | 3.024 | 2.857 | 2.498 | 3.071 |
| 2.679 | 2.895 | 3.314 | 3.889 | 2.507 | 1.112 |
| 2.729 | 2.198 | 2.978 | 3.048 | 3.252 | 2.712 |
| 2.529 | 2.043 | 1.942 | 2.406 | 2.260 | 2.312 |
| 4.621 | 5.409 | 4.855 | 4.782 | 4.242 | 4.233 |
| 4.427 | 4.468 | 3.509 | 3.569 | 3.293 | 3.477 |
| 2.801 | 1.667 | 1.567 | 1.096 | 1.966 | 2.501 |
| 3.189 | 3.382 | 3.395 | 3.562 | 3.689 | 4.796 |
| 1.308 | 1.654 | 2.201 | 2.225 | 2.530 | 4.009 |
| 6.180 | 5.912 | 6.014 | 6.917 | 6.184 | 6.566 |
| 3.703 | 2.962 | 2.472 | 2.932 | 2.912 | 2.317 |
| 4.938 | 4.506 | 4.308 | 5.420 | 5.145 | 5.601 |
| 2.668 | 1.814 | 1.951 | 1.340 | 1.901 | 2.043 |
| 5.116 | 5.054 | 5.746 | 5.341 | 5.193 | 3.574 |
| 5.391 | 6.807 | 5.721 | 5.617 | 6.034 | 5.767 |
| 7.160 | 6.772 | 6.100 | 7.039 | 6.564 | 7.014 |
| 3.023 | 2.984 | 3.208 | 3.703 | 3.167 | 3.836 |
| 4.405 | 4.218 | 4.714 | 4.338 | 4.516 | 3.463 |
| 4.338 | 4.215 | 4.726 | 4.501 | 4.637 | 4.928 |
| 5.502 | 4.842 | 5.118 | 4.903 | 5.194 | 4.790 |
| 3.618 | 2.950 | 3.732 | 3.623 | 3.648 | 3.961 |
| 7.914 | 8.594 | 8.130 | 7.969 | 8.283 | 8.014 |

|       |       |       |       |       |       |
|-------|-------|-------|-------|-------|-------|
| 4.636 | 4.998 | 4.959 | 4.688 | 5.292 | 4.334 |
| 3.708 | 2.972 | 3.374 | 3.664 | 3.304 | 4.420 |
| 2.067 | 2.588 | 2.269 | 1.997 | 2.309 | 2.881 |
| 2.760 | 3.763 | 2.974 | 2.230 | 2.339 | 2.736 |
| 5.133 | 4.678 | 4.639 | 4.946 | 5.104 | 6.326 |
| 3.599 | 3.336 | 3.573 | 3.285 | 3.238 | 3.781 |
| 6.389 | 6.145 | 5.716 | 6.175 | 6.357 | 7.383 |
| 7.804 | 7.966 | 7.969 | 7.835 | 7.695 | 7.372 |
| 2.468 | 2.575 | 2.458 | 2.279 | 3.283 | 2.193 |
| 5.952 | 5.683 | 6.118 | 5.704 | 5.514 | 4.905 |
| 4.524 | 4.529 | 4.134 | 4.418 | 4.503 | 3.683 |
| 3.835 | 4.089 | 3.774 | 4.302 | 3.808 | 4.837 |
| 5.487 | 5.095 | 5.264 | 5.953 | 5.747 | 5.520 |
| 6.554 | 5.796 | 6.096 | 6.186 | 6.090 | 6.276 |
| 2.264 | 3.607 | 3.717 | 3.118 | 2.569 | 2.882 |
| 3.968 | 2.904 | 2.159 | 3.040 | 3.916 | 3.077 |
| 4.319 | 4.051 | 4.122 | 4.416 | 4.417 | 3.440 |
| 3.450 | 3.508 | 3.429 | 3.517 | 3.720 | 4.168 |
| 6.167 | 5.393 | 6.233 | 5.884 | 5.762 | 3.736 |
| 5.056 | 4.642 | 4.641 | 4.399 | 4.381 | 2.810 |
| 6.249 | 6.047 | 6.243 | 6.261 | 6.207 | 6.501 |
| 6.508 | 6.929 | 6.720 | 6.653 | 6.807 | 6.009 |
| 6.860 | 7.007 | 6.727 | 6.749 | 6.670 | 6.313 |
| 6.532 | 6.149 | 6.477 | 6.663 | 6.714 | 6.212 |
| 5.775 | 6.389 | 6.151 | 6.108 | 5.977 | 5.427 |
| 2.768 | 2.876 | 3.578 | 2.966 | 3.384 | 2.590 |
| 5.966 | 6.275 | 5.920 | 5.869 | 5.834 | 4.388 |
| 5.410 | 5.503 | 5.378 | 5.403 | 4.984 | 3.745 |
| 5.236 | 5.555 | 5.239 | 5.429 | 5.281 | 4.576 |
| 3.458 | 3.673 | 3.461 | 3.603 | 3.262 | 2.920 |
| 3.725 | 3.305 | 2.717 | 3.197 | 3.773 | 5.922 |
| 4.452 | 4.142 | 4.453 | 4.542 | 4.511 | 5.737 |
| 6.132 | 6.464 | 6.260 | 6.293 | 6.352 | 4.717 |
| 3.667 | 3.751 | 3.736 | 2.871 | 3.409 | 3.672 |
| 3.767 | 3.868 | 4.130 | 4.077 | 4.190 | 4.728 |
| 4.665 | 4.613 | 4.661 | 5.102 | 5.017 | 4.778 |
| 4.441 | 3.624 | 4.350 | 4.997 | 4.052 | 3.724 |
| 5.779 | 4.939 | 4.910 | 5.688 | 5.289 | 5.673 |
| 8.005 | 8.180 | 8.173 | 7.929 | 7.998 | 7.371 |
| 8.856 | 8.926 | 8.765 | 8.834 | 8.820 | 7.772 |
| 5.208 | 4.953 | 4.683 | 4.796 | 4.693 | 7.094 |
| 3.480 | 2.570 | 2.709 | 2.875 | 3.021 | 2.671 |
| 2.715 | 2.625 | 2.218 | 2.772 | 2.429 | 2.544 |
| 5.337 | 5.508 | 5.001 | 4.388 | 4.781 | 4.770 |
| 2.159 | 1.643 | 1.068 | 1.288 | 2.190 | 3.400 |
| 2.142 | 2.665 | 2.811 | 2.835 | 3.674 | 3.137 |
| 2.175 | 2.441 | 2.181 | 1.695 | 2.026 | 2.209 |
| 2.881 | 3.049 | 3.877 | 2.750 | 2.909 | 1.710 |
| 3.639 | 3.363 | 2.892 | 4.153 | 3.966 | 3.090 |
| 2.167 | 1.371 | 3.168 | 2.855 | 3.404 | 1.936 |

|       |       |       |       |       |       |
|-------|-------|-------|-------|-------|-------|
| 3.906 | 3.066 | 3.496 | 3.450 | 3.202 | 2.464 |
| 4.382 | 3.587 | 3.552 | 3.004 | 3.124 | 3.716 |
| 3.953 | 4.343 | 3.935 | 3.679 | 3.232 | 1.758 |
| 4.770 | 4.843 | 4.506 | 4.383 | 5.247 | 6.466 |
| 3.053 | 2.705 | 2.800 | 3.089 | 2.914 | 3.646 |
| 2.277 | 3.129 | 3.366 | 2.693 | 1.475 | 2.153 |
| 4.395 | 4.646 | 4.897 | 4.455 | 4.150 | 3.912 |
| 6.697 | 6.693 | 6.325 | 5.664 | 6.156 | 6.682 |
| 4.870 | 4.099 | 4.911 | 4.677 | 4.631 | 3.705 |
| 3.512 | 3.438 | 3.781 | 3.733 | 3.954 | 3.966 |
| 4.515 | 3.920 | 3.866 | 4.444 | 4.392 | 5.358 |
| 2.243 | 1.988 | 1.396 | 0.997 | 2.237 | 2.094 |
| 3.174 | 2.936 | 3.472 | 2.516 | 3.585 | 2.509 |
| 4.227 | 4.974 | 4.871 | 4.164 | 4.125 | 5.665 |
| 6.006 | 6.227 | 5.834 | 5.853 | 6.206 | 5.676 |
| 1.610 | 1.820 | 1.552 | 1.437 | 1.790 | 2.219 |
| 3.374 | 4.170 | 3.671 | 4.102 | 4.182 | 3.625 |
| 9.195 | 8.955 | 8.835 | 9.141 | 8.965 | 6.819 |
| 3.606 | 3.412 | 3.421 | 3.881 | 3.526 | 5.008 |
| 3.589 | 4.386 | 4.192 | 3.596 | 4.298 | 5.002 |
| 5.832 | 6.207 | 6.112 | 6.302 | 6.366 | 7.212 |
| 5.885 | 5.811 | 5.486 | 5.513 | 5.593 | 3.855 |
| 2.455 | 4.557 | 3.311 | 3.962 | 4.280 | 3.271 |
| 6.842 | 6.359 | 6.650 | 6.372 | 6.536 | 6.845 |
| 7.401 | 7.516 | 7.453 | 7.385 | 7.270 | 5.790 |
| 2.504 | 1.901 | 2.585 | 2.862 | 2.610 | 3.046 |
| 2.126 | 3.082 | 2.326 | 2.376 | 2.270 | 1.773 |
| 4.652 | 4.939 | 4.587 | 4.902 | 4.826 | 6.056 |
| 4.768 | 4.467 | 4.765 | 4.445 | 4.963 | 5.057 |
| 4.384 | 3.699 | 3.816 | 3.772 | 4.069 | 4.573 |
| 4.502 | 4.485 | 4.582 | 4.578 | 4.580 | 4.754 |
| 5.651 | 5.119 | 5.583 | 4.678 | 5.291 | 3.849 |
| 4.044 | 4.536 | 4.520 | 3.588 | 3.720 | 5.271 |
| 5.061 | 5.047 | 5.020 | 5.178 | 5.196 | 3.762 |
| 4.662 | 4.336 | 4.660 | 3.948 | 4.555 | 2.854 |
| 3.649 | 3.701 | 4.434 | 2.865 | 3.883 | 4.194 |
| 2.878 | 3.345 | 3.536 | 3.254 | 3.504 | 3.205 |
| 2.900 | 3.090 | 2.600 | 2.597 | 3.074 | 2.117 |
| 6.296 | 6.486 | 6.155 | 5.894 | 5.812 | 3.809 |
| 7.223 | 7.064 | 6.841 | 6.850 | 6.952 | 5.920 |
| 8.442 | 8.737 | 8.728 | 8.552 | 8.592 | 7.375 |
| 3.525 | 3.488 | 3.692 | 3.716 | 3.971 | 4.650 |
| 3.846 | 3.065 | 2.965 | 3.041 | 3.143 | 4.521 |
| 3.415 | 3.236 | 2.924 | 2.596 | 3.305 | 3.531 |
| 9.464 | 9.288 | 9.744 | 9.435 | 9.393 | 8.219 |
| 2.826 | 4.253 | 3.380 | 3.620 | 3.033 | 4.624 |
| 4.385 | 2.729 | 3.139 | 3.870 | 2.858 | 4.251 |
| 3.239 | 2.575 | 2.886 | 3.996 | 1.753 | 3.499 |
| 4.295 | 4.701 | 4.527 | 4.325 | 4.325 | 3.222 |
| 6.764 | 6.727 | 6.522 | 6.552 | 6.696 | 4.990 |

|       |       |       |       |       |       |
|-------|-------|-------|-------|-------|-------|
| 6.348 | 6.359 | 6.021 | 6.094 | 6.253 | 4.922 |
| 3.757 | 3.753 | 3.742 | 3.995 | 3.981 | 4.819 |
| 7.671 | 7.960 | 7.803 | 7.810 | 7.686 | 6.783 |
| 4.420 | 4.431 | 4.690 | 4.717 | 5.290 | 5.404 |
| 2.776 | 2.664 | 2.748 | 2.368 | 2.519 | 3.670 |
| 8.140 | 8.185 | 8.113 | 7.942 | 8.061 | 4.526 |
| 3.896 | 3.997 | 3.865 | 3.536 | 3.542 | 2.452 |
| 6.045 | 5.481 | 5.379 | 6.551 | 6.153 | 6.829 |
| 3.597 | 3.047 | 3.446 | 3.188 | 3.127 | 2.493 |
| 5.482 | 5.085 | 5.268 | 5.714 | 5.393 | 3.601 |
| 3.112 | 1.451 | 2.474 | 3.027 | 2.521 | 1.918 |
| 5.716 | 5.677 | 5.421 | 5.344 | 5.476 | 6.224 |
| 7.214 | 7.448 | 7.515 | 7.501 | 7.501 | 6.850 |
| 5.936 | 6.147 | 5.954 | 6.018 | 6.327 | 5.318 |
| 6.060 | 6.605 | 6.351 | 6.662 | 6.615 | 6.554 |
| 3.072 | 4.070 | 3.905 | 3.950 | 4.231 | 3.174 |
| 1.612 | 1.525 | 1.701 | 2.078 | 2.076 | 3.322 |
| 5.809 | 5.603 | 5.778 | 6.108 | 6.407 | 7.681 |
| 4.174 | 3.960 | 3.884 | 4.595 | 4.818 | 6.111 |
| 6.673 | 6.191 | 6.692 | 6.625 | 6.701 | 8.131 |
| 3.767 | 3.289 | 3.387 | 3.019 | 3.324 | 4.183 |
| 6.418 | 5.668 | 5.845 | 6.306 | 6.397 | 7.346 |
| 6.472 | 6.840 | 6.570 | 6.341 | 6.461 | 6.186 |
| 6.435 | 6.851 | 6.646 | 6.501 | 6.625 | 6.893 |
| 4.479 | 4.207 | 4.466 | 4.859 | 4.270 | 5.837 |
| 4.769 | 5.904 | 5.764 | 4.163 | 4.588 | 5.840 |
| 5.035 | 6.275 | 6.137 | 4.390 | 4.958 | 6.124 |
| 5.090 | 6.325 | 6.128 | 4.519 | 4.983 | 6.248 |
| 3.001 | 3.132 | 3.001 | 3.006 | 3.548 | 3.915 |
| 5.342 | 4.594 | 5.184 | 5.185 | 5.196 | 4.888 |
| 2.630 | 2.287 | 2.184 | 2.201 | 2.160 | 1.527 |
| 4.831 | 4.435 | 4.622 | 4.826 | 4.409 | 1.118 |
| 4.026 | 1.661 | 2.693 | 2.808 | 3.181 | 1.248 |
| 7.133 | 7.263 | 7.032 | 6.891 | 7.073 | 6.478 |
| 9.118 | 9.118 | 9.100 | 9.204 | 9.072 | 7.485 |
| 8.386 | 8.742 | 8.510 | 8.563 | 8.704 | 8.005 |
| 7.016 | 7.063 | 6.571 | 6.680 | 6.787 | 5.579 |
| 2.016 | 1.982 | 2.895 | 2.100 | 2.543 | 2.997 |
| 4.984 | 5.024 | 4.990 | 4.461 | 4.791 | 1.717 |
| 3.803 | 3.422 | 3.573 | 3.569 | 3.373 | 4.108 |
| 3.472 | 3.206 | 2.717 | 3.146 | 2.601 | 2.679 |
| 4.083 | 3.882 | 3.282 | 3.957 | 3.183 | 3.813 |
| 2.179 | 2.654 | 2.364 | 3.014 | 2.961 | 2.247 |
| 8.515 | 8.392 | 8.326 | 8.446 | 8.417 | 7.373 |
| 3.099 | 3.119 | 2.634 | 3.417 | 2.867 | 3.980 |
| 2.782 | 3.364 | 2.358 | 3.080 | 3.142 | 1.999 |
| 4.225 | 4.179 | 4.222 | 4.368 | 4.530 | 5.137 |
| 6.417 | 6.744 | 6.568 | 6.320 | 6.655 | 5.977 |
| 2.693 | 3.388 | 3.622 | 2.666 | 2.211 | 2.647 |
| 5.999 | 5.978 | 5.952 | 6.248 | 6.159 | 7.041 |

|       |       |       |       |       |       |
|-------|-------|-------|-------|-------|-------|
| 5.913 | 6.658 | 6.112 | 6.372 | 6.617 | 8.194 |
| 4.615 | 4.866 | 4.852 | 4.999 | 5.099 | 3.876 |
| 3.006 | 3.413 | 2.377 | 3.596 | 2.897 | 2.842 |
| 3.375 | 2.448 | 2.203 | 3.209 | 2.251 | 2.377 |
| 6.467 | 6.534 | 6.280 | 6.363 | 6.318 | 7.132 |
| 4.109 | 5.204 | 5.052 | 5.270 | 4.947 | 4.928 |
| 3.650 | 3.904 | 4.233 | 3.908 | 3.993 | 4.164 |
| 3.249 | 3.033 | 3.459 | 3.388 | 3.062 | 2.946 |
| 2.554 | 2.284 | 1.731 | 3.250 | 1.603 | 2.339 |
| 5.167 | 5.245 | 4.963 | 4.714 | 5.219 | 4.508 |
| 1.737 | 2.495 | 2.035 | 2.782 | 2.224 | 3.078 |
| 1.896 | 3.555 | 3.202 | 2.659 | 3.273 | 1.172 |
| 3.800 | 3.942 | 3.444 | 3.810 | 3.872 | 3.117 |
| 2.372 | 2.658 | 2.790 | 2.840 | 2.026 | 2.356 |
| 3.932 | 4.675 | 4.338 | 4.147 | 4.038 | 4.843 |
| 6.555 | 6.281 | 6.626 | 5.481 | 5.869 | 6.243 |
| 3.638 | 3.660 | 3.254 | 3.251 | 3.348 | 3.631 |
| 5.672 | 6.181 | 5.748 | 6.128 | 5.742 | 4.556 |
| 6.385 | 6.394 | 6.234 | 6.359 | 6.297 | 5.702 |
| 2.380 | 1.931 | 2.083 | 2.121 | 2.069 | 3.784 |
| 2.894 | 2.447 | 2.347 | 2.333 | 2.656 | 2.999 |
| 3.329 | 3.396 | 3.314 | 2.697 | 3.503 | 2.550 |
| 5.484 | 6.040 | 6.282 | 6.229 | 6.370 | 7.123 |
| 4.803 | 4.464 | 4.587 | 4.259 | 4.393 | 2.876 |
| 2.070 | 1.791 | 1.935 | 2.024 | 2.289 | 2.007 |
| 6.579 | 6.469 | 6.570 | 6.406 | 5.980 | 5.151 |
| 2.945 | 2.640 | 2.553 | 3.092 | 2.984 | 2.537 |
| 6.476 | 6.680 | 6.915 | 6.667 | 6.860 | 6.069 |
| 3.886 | 3.906 | 4.117 | 3.948 | 4.501 | 4.836 |
| 8.508 | 8.455 | 8.255 | 8.121 | 7.951 | 6.259 |
| 3.629 | 3.899 | 4.288 | 4.505 | 4.097 | 5.063 |
| 5.544 | 5.991 | 5.912 | 5.744 | 5.435 | 5.184 |
| 2.500 | 2.682 | 3.800 | 2.755 | 2.425 | 3.191 |
| 3.531 | 3.766 | 3.842 | 3.652 | 3.547 | 4.348 |
| 5.692 | 6.083 | 5.649 | 5.764 | 5.737 | 5.755 |
| 3.406 | 2.436 | 2.837 | 3.277 | 3.877 | 4.298 |
| 5.689 | 5.115 | 5.459 | 5.293 | 5.247 | 5.149 |
| 3.295 | 2.337 | 2.869 | 3.191 | 3.589 | 2.944 |
| 3.712 | 3.641 | 4.180 | 3.971 | 4.340 | 5.376 |
| 6.328 | 5.296 | 5.763 | 5.800 | 5.852 | 4.607 |
| 3.070 | 3.671 | 3.371 | 2.894 | 3.517 | 3.693 |
| 5.238 | 5.722 | 5.300 | 5.386 | 5.629 | 5.739 |
| 9.529 | 9.438 | 9.404 | 9.535 | 9.450 | 9.095 |
| 8.308 | 8.350 | 8.404 | 8.605 | 8.437 | 7.840 |
| 2.041 | 2.358 | 2.622 | 2.536 | 3.110 | 2.810 |
| 4.360 | 4.184 | 4.422 | 4.780 | 4.540 | 5.558 |
| 6.541 | 6.521 | 6.433 | 6.759 | 6.760 | 7.532 |
| 2.899 | 2.568 | 2.629 | 2.514 | 2.871 | 2.524 |
| 6.142 | 6.832 | 6.561 | 6.685 | 6.708 | 5.438 |
| 6.102 | 5.819 | 5.824 | 6.064 | 6.033 | 6.631 |

|       |       |       |       |       |       |
|-------|-------|-------|-------|-------|-------|
| 5.864 | 6.042 | 5.788 | 5.987 | 6.156 | 6.616 |
| 5.762 | 5.812 | 5.525 | 6.069 | 5.788 | 6.604 |
| 6.992 | 7.482 | 7.236 | 7.001 | 7.227 | 6.750 |
| 6.575 | 6.601 | 6.229 | 6.542 | 6.611 | 5.977 |
| 5.170 | 4.743 | 4.330 | 5.491 | 4.211 | 4.156 |
| 5.585 | 4.299 | 4.552 | 4.786 | 4.603 | 3.076 |
| 3.135 | 4.849 | 4.856 | 4.241 | 4.432 | 3.522 |
| 7.592 | 6.550 | 6.961 | 7.039 | 6.743 | 5.654 |
| 7.800 | 6.643 | 7.192 | 7.241 | 6.823 | 5.764 |
| 6.306 | 4.814 | 4.754 | 4.742 | 5.785 | 3.154 |
| 5.022 | 3.634 | 0.980 | 3.951 | 4.046 | 0.535 |
| 1.835 | 1.766 | 1.976 | 2.322 | 2.194 | 1.507 |
| 5.229 | 5.046 | 5.241 | 5.538 | 5.659 | 3.913 |
| 5.890 | 5.850 | 5.621 | 6.284 | 5.716 | 5.372 |
| 1.919 | 2.376 | 3.271 | 3.615 | 2.544 | 1.782 |
| 6.385 | 6.730 | 6.266 | 6.248 | 6.463 | 5.816 |
| 4.368 | 2.935 | 4.347 | 4.157 | 3.551 | 1.308 |
| 5.576 | 5.230 | 5.409 | 5.719 | 5.140 | 4.420 |
| 3.816 | 4.233 | 4.109 | 3.982 | 3.785 | 2.013 |
| 4.645 | 4.088 | 4.690 | 4.827 | 4.504 | 3.157 |
| 1.982 | 2.469 | 2.100 | 2.145 | 2.300 | 3.814 |
| 4.647 | 4.943 | 5.311 | 4.642 | 5.077 | 3.693 |
| 6.946 | 6.873 | 6.246 | 7.410 | 6.848 | 6.970 |
| 4.705 | 4.421 | 5.691 | 4.772 | 4.872 | 4.945 |
| 7.690 | 7.720 | 7.587 | 7.796 | 7.733 | 8.823 |
| 5.493 | 5.339 | 5.379 | 5.158 | 5.108 | 4.429 |
| 4.841 | 5.084 | 5.098 | 5.571 | 5.149 | 6.585 |
| 2.222 | 2.939 | 2.401 | 3.044 | 2.858 | 3.573 |
| 4.546 | 5.310 | 4.942 | 4.921 | 4.813 | 3.921 |
| 5.866 | 6.300 | 6.329 | 5.955 | 5.887 | 5.778 |
| 3.297 | 3.566 | 4.075 | 3.425 | 2.972 | 3.654 |
| 7.435 | 7.191 | 7.064 | 7.534 | 7.022 | 5.676 |
| 4.056 | 4.264 | 4.068 | 4.389 | 4.233 | 4.595 |
| 6.754 | 6.759 | 7.321 | 7.773 | 7.647 | 9.366 |
| 6.448 | 6.331 | 6.891 | 6.221 | 6.567 | 3.046 |
| 6.042 | 6.036 | 6.349 | 6.287 | 6.375 | 5.356 |
| 7.462 | 7.546 | 7.649 | 7.552 | 7.549 | 6.392 |
| 7.922 | 8.130 | 7.927 | 7.534 | 7.570 | 8.287 |
| 3.695 | 3.401 | 3.241 | 3.481 | 3.211 | 4.761 |
| 3.474 | 3.932 | 3.470 | 3.655 | 3.718 | 4.563 |
| 2.208 | 2.208 | 1.781 | 1.824 | 2.342 | 1.864 |
| 5.646 | 5.714 | 5.359 | 5.922 | 5.716 | 7.068 |
| 4.475 | 4.344 | 4.350 | 4.589 | 4.848 | 5.150 |
| 5.179 | 4.197 | 4.120 | 4.063 | 4.511 | 4.540 |
| 5.325 | 5.269 | 5.523 | 5.148 | 5.179 | 4.790 |
| 1.795 | 1.956 | 2.109 | 1.722 | 2.119 | 3.658 |
| 7.694 | 6.887 | 6.743 | 6.846 | 6.787 | 7.750 |
| 3.093 | 2.833 | 2.142 | 3.012 | 2.669 | 2.321 |
| 2.078 | 2.358 | 1.719 | 2.580 | 1.679 | 2.630 |
| 5.894 | 4.798 | 4.595 | 5.264 | 5.104 | 4.974 |



|       |       |       |       |       |       |
|-------|-------|-------|-------|-------|-------|
| 6.154 | 6.562 | 5.970 | 6.250 | 6.437 | 7.208 |
| 7.422 | 7.244 | 7.375 | 7.305 | 7.162 | 8.779 |
| 9.413 | 9.957 | 9.650 | 9.744 | 9.823 | 8.611 |
| 4.521 | 4.700 | 4.456 | 4.113 | 4.412 | 5.079 |
| 2.553 | 2.075 | 2.189 | 1.705 | 3.192 | 2.303 |
| 1.985 | 1.971 | 2.663 | 2.158 | 2.610 | 2.426 |
| 2.888 | 3.010 | 2.654 | 2.589 | 2.684 | 2.164 |
| 3.734 | 3.793 | 3.525 | 4.102 | 3.737 | 4.351 |
| 2.637 | 3.130 | 3.375 | 2.416 | 3.439 | 2.643 |
| 5.467 | 4.737 | 4.509 | 4.756 | 5.191 | 5.404 |
| 2.275 | 2.509 | 2.073 | 2.153 | 2.087 | 2.985 |
| 2.976 | 2.614 | 2.347 | 2.174 | 2.681 | 1.582 |
| 2.824 | 2.964 | 3.754 | 3.055 | 2.795 | 2.568 |
| 4.461 | 3.872 | 4.062 | 4.117 | 4.017 | 4.531 |
| 3.111 | 2.849 | 3.015 | 2.492 | 2.170 | 3.666 |
| 2.714 | 2.912 | 2.470 | 2.743 | 4.289 | 4.480 |
| 4.654 | 5.632 | 5.062 | 4.915 | 5.230 | 4.301 |
| 6.445 | 5.376 | 5.949 | 5.692 | 5.583 | 5.461 |
| 3.249 | 3.745 | 3.382 | 4.013 | 3.089 | 3.747 |
| 6.407 | 6.491 | 6.427 | 6.136 | 6.028 | 4.757 |
| 5.312 | 5.240 | 4.456 | 5.160 | 4.723 | 5.763 |
| 2.418 | 2.360 | 3.285 | 3.281 | 2.697 | 2.055 |
| 6.575 | 6.436 | 6.720 | 6.573 | 6.460 | 5.586 |
| 6.460 | 6.746 | 6.599 | 6.687 | 6.626 | 5.856 |
| 3.667 | 3.717 | 3.642 | 3.977 | 3.403 | 3.078 |
| 6.262 | 6.458 | 6.257 | 6.561 | 6.217 | 5.914 |
| 7.751 | 7.468 | 7.773 | 7.477 | 7.289 | 6.248 |
| 3.159 | 4.505 | 3.807 | 3.445 | 2.840 | 5.275 |
| 6.595 | 5.401 | 5.746 | 6.057 | 6.568 | 6.126 |
| 7.078 | 7.162 | 7.202 | 7.108 | 7.208 | 6.734 |
| 4.624 | 4.385 | 4.996 | 4.744 | 4.912 | 6.294 |
| 5.747 | 5.994 | 5.451 | 4.579 | 4.746 | 7.928 |
| 8.386 | 8.003 | 8.360 | 8.394 | 8.612 | 9.430 |
| 3.127 | 3.865 | 3.904 | 3.351 | 3.904 | 4.279 |
| 2.665 | 3.106 | 3.207 | 2.928 | 2.942 | 3.544 |
| 2.602 | 2.994 | 3.311 | 2.720 | 3.143 | 3.366 |
| 1.650 | 1.962 | 1.933 | 1.507 | 2.345 | 2.376 |
| 3.635 | 2.921 | 3.347 | 3.422 | 3.222 | 3.255 |
| 2.672 | 2.859 | 3.421 | 3.024 | 2.637 | 3.467 |
| 8.710 | 7.498 | 8.023 | 8.336 | 7.818 | 8.948 |
| 3.982 | 4.054 | 3.871 | 3.869 | 3.954 | 4.239 |
| 5.184 | 4.265 | 4.505 | 4.686 | 4.868 | 3.951 |
| 1.913 | 2.285 | 3.210 | 1.516 | 1.929 | 1.689 |
| 4.551 | 4.644 | 5.563 | 4.093 | 5.313 | 5.558 |
| 6.108 | 6.329 | 5.993 | 5.917 | 6.168 | 5.537 |
| 7.718 | 8.448 | 8.257 | 8.069 | 8.267 | 7.703 |
| 5.441 | 5.050 | 5.028 | 5.611 | 5.292 | 6.653 |
| 4.681 | 5.103 | 5.218 | 4.566 | 5.025 | 5.126 |
| 3.967 | 5.671 | 4.897 | 4.676 | 5.329 | 8.107 |
| 5.154 | 4.923 | 5.130 | 4.989 | 5.388 | 4.648 |

|       |       |       |       |       |       |
|-------|-------|-------|-------|-------|-------|
| 3.780 | 4.326 | 4.844 | 4.598 | 4.199 | 4.566 |
| 2.545 | 2.502 | 2.248 | 3.016 | 1.546 | 2.952 |
| 3.996 | 2.970 | 3.499 | 3.609 | 3.399 | 2.363 |
| 2.421 | 2.754 | 2.982 | 3.133 | 3.376 | 4.029 |
| 4.609 | 4.547 | 4.609 | 4.650 | 4.956 | 5.503 |
| 6.027 | 5.739 | 6.137 | 6.508 | 6.263 | 6.730 |
| 5.319 | 3.913 | 3.565 | 3.868 | 4.176 | 2.838 |
| 6.532 | 6.275 | 6.467 | 6.166 | 6.419 | 5.473 |
| 7.601 | 8.126 | 7.648 | 7.683 | 7.657 | 7.080 |
| 5.098 | 5.716 | 5.567 | 5.115 | 5.197 | 3.912 |
| 7.073 | 7.233 | 6.961 | 7.152 | 6.965 | 7.837 |
| 1.849 | 1.920 | 1.801 | 1.768 | 1.636 | 2.414 |
| 5.132 | 5.328 | 4.919 | 5.350 | 5.214 | 6.508 |
| 4.946 | 4.555 | 4.129 | 4.212 | 3.934 | 4.072 |
| 5.269 | 5.568 | 5.861 | 5.589 | 5.705 | 3.400 |
| 3.142 | 3.052 | 3.200 | 2.824 | 3.141 | 4.635 |
| 2.031 | 2.490 | 2.571 | 3.125 | 2.825 | 3.869 |
| 5.383 | 5.680 | 5.668 | 6.053 | 6.189 | 7.255 |
| 4.435 | 4.245 | 4.012 | 4.062 | 4.368 | 5.107 |
| 3.498 | 3.061 | 4.037 | 3.288 | 3.320 | 3.975 |
| 7.730 | 7.456 | 7.399 | 7.528 | 7.178 | 6.750 |
| 5.461 | 4.206 | 4.405 | 5.343 | 4.311 | 5.204 |
| 2.527 | 2.848 | 2.762 | 2.796 | 3.019 | 3.045 |
| 3.717 | 2.372 | 2.508 | 2.626 | 2.626 | 2.074 |
| 2.733 | 2.973 | 2.183 | 2.627 | 2.342 | 3.150 |
| 9.064 | 8.752 | 8.810 | 9.009 | 8.741 | 7.044 |
| 8.709 | 8.651 | 8.733 | 8.533 | 8.547 | 8.005 |
| 3.118 | 3.182 | 3.366 | 3.206 | 3.548 | 4.323 |
| 3.728 | 4.007 | 3.651 | 3.289 | 3.409 | 4.083 |
| 6.521 | 6.538 | 6.806 | 6.510 | 6.726 | 5.311 |
| 4.119 | 3.648 | 3.259 | 3.890 | 3.800 | 4.349 |
| 3.315 | 3.044 | 3.647 | 2.682 | 2.903 | 3.649 |
| 6.085 | 5.858 | 6.149 | 6.022 | 6.194 | 5.118 |
| 3.502 | 2.841 | 3.145 | 3.805 | 3.336 | 3.477 |
| 4.212 | 4.208 | 4.493 | 4.196 | 4.134 | 4.956 |
| 5.073 | 5.241 | 5.286 | 5.365 | 5.183 | 6.494 |
| 6.521 | 6.522 | 6.579 | 6.311 | 6.761 | 5.723 |
| 8.436 | 8.507 | 8.536 | 8.515 | 8.435 | 7.717 |
| 2.873 | 2.852 | 2.529 | 2.748 | 2.892 | 3.022 |
| 2.461 | 1.968 | 2.043 | 2.602 | 2.047 | 2.359 |
| 7.705 | 7.374 | 7.086 | 6.942 | 7.383 | 5.225 |
| 5.463 | 5.913 | 6.004 | 5.312 | 5.529 | 4.217 |
| 4.612 | 5.170 | 4.883 | 4.841 | 4.833 | 3.683 |
| 3.869 | 3.685 | 3.805 | 4.189 | 3.887 | 3.351 |
| 4.603 | 4.843 | 4.910 | 5.028 | 5.092 | 6.624 |
| 3.934 | 3.698 | 4.190 | 3.720 | 3.807 | 4.338 |
| 1.732 | 1.627 | 2.062 | 1.203 | 1.922 | 2.466 |
| 6.811 | 7.006 | 6.799 | 7.088 | 6.842 | 8.388 |
| 4.060 | 2.683 | 3.015 | 2.940 | 2.864 | 2.420 |
| 8.614 | 8.464 | 8.690 | 8.547 | 8.706 | 7.293 |

|        |        |        |        |        |        |
|--------|--------|--------|--------|--------|--------|
| 5.583  | 4.717  | 4.971  | 4.742  | 5.210  | 4.742  |
| 7.056  | 7.370  | 7.010  | 7.061  | 7.048  | 6.043  |
| 6.841  | 6.784  | 6.825  | 6.808  | 6.769  | 6.341  |
| 5.748  | 6.012  | 6.074  | 5.604  | 6.131  | 4.454  |
| 5.371  | 5.552  | 5.409  | 4.922  | 4.593  | 2.920  |
| 7.069  | 7.252  | 7.021  | 6.919  | 7.300  | 5.233  |
| 3.166  | 4.036  | 4.423  | 3.635  | 4.098  | 2.291  |
| 5.466  | 5.822  | 5.838  | 5.483  | 5.558  | 3.599  |
| 10.639 | 10.888 | 10.784 | 10.834 | 10.781 | 10.098 |
| 2.096  | 2.599  | 2.156  | 2.061  | 2.058  | 1.972  |
| 1.481  | 1.475  | 1.682  | 1.814  | 1.480  | 1.844  |
| 5.851  | 5.332  | 5.736  | 5.592  | 5.045  | 4.103  |
| 6.338  | 6.365  | 6.522  | 6.306  | 6.242  | 5.675  |
| 8.630  | 8.565  | 8.506  | 8.376  | 8.287  | 7.506  |
| 6.658  | 6.733  | 6.558  | 6.738  | 6.409  | 5.515  |
| 5.530  | 5.475  | 5.644  | 5.524  | 5.421  | 3.460  |
| 4.617  | 4.838  | 4.787  | 4.287  | 4.188  | 4.958  |
| 5.120  | 5.578  | 5.371  | 5.465  | 5.602  | 4.404  |
| 6.508  | 6.253  | 6.666  | 6.615  | 6.484  | 4.390  |
| 5.479  | 5.514  | 5.098  | 5.460  | 5.447  | 5.428  |
| 4.664  | 4.889  | 4.674  | 4.747  | 5.361  | 5.615  |
| 7.249  | 6.737  | 7.640  | 7.124  | 7.006  | 8.497  |
| 6.637  | 6.690  | 6.324  | 6.380  | 6.371  | 8.209  |
| 3.888  | 4.221  | 3.682  | 4.209  | 4.202  | 4.864  |
| 2.284  | 1.515  | 2.120  | 1.783  | 2.458  | 2.919  |
| 5.253  | 5.068  | 5.615  | 5.282  | 5.620  | 5.660  |
| 3.437  | 2.992  | 2.786  | 3.505  | 3.101  | 2.596  |
| 4.678  | 5.156  | 5.069  | 4.547  | 4.488  | 3.968  |
| 4.364  | 4.817  | 4.840  | 4.953  | 4.899  | 2.530  |
| 6.654  | 6.640  | 6.574  | 6.804  | 6.565  | 7.433  |
| 3.126  | 3.031  | 2.209  | 3.058  | 2.454  | 2.605  |
| 5.357  | 5.149  | 5.108  | 4.795  | 4.987  | 5.433  |
| 2.179  | 2.113  | 2.973  | 2.539  | 2.643  | 1.781  |
| 4.758  | 4.563  | 4.619  | 4.605  | 4.466  | 5.459  |
| 6.329  | 5.578  | 6.025  | 6.562  | 6.006  | 6.236  |
| 3.561  | 3.423  | 3.478  | 2.804  | 3.417  | 2.474  |
| 6.859  | 7.053  | 6.852  | 6.819  | 6.916  | 6.451  |
| 4.301  | 4.126  | 3.993  | 4.210  | 4.614  | 4.488  |
| 5.740  | 6.104  | 5.856  | 5.671  | 6.236  | 5.238  |
| 5.906  | 5.986  | 5.830  | 6.010  | 5.878  | 5.051  |
| 6.120  | 6.374  | 6.440  | 7.225  | 7.457  | 7.752  |
| 5.260  | 4.825  | 4.683  | 5.156  | 5.211  | 3.551  |
| 5.545  | 5.723  | 5.459  | 5.359  | 5.586  | 3.743  |
| 6.741  | 6.642  | 6.664  | 6.216  | 6.659  | 5.447  |
| 8.201  | 7.747  | 7.889  | 8.015  | 7.876  | 7.318  |
| 4.924  | 5.051  | 5.483  | 5.183  | 5.027  | 5.800  |
| 5.502  | 5.113  | 5.515  | 5.580  | 5.050  | 4.546  |
| 4.801  | 5.205  | 4.967  | 4.400  | 4.569  | 3.844  |
| 8.683  | 8.640  | 8.756  | 8.564  | 8.634  | 6.546  |
| 4.258  | 3.820  | 3.484  | 3.955  | 3.680  | 4.624  |

|        |        |        |        |        |        |
|--------|--------|--------|--------|--------|--------|
| 3.750  | 3.354  | 2.988  | 2.881  | 3.144  | 3.493  |
| 3.350  | 3.829  | 3.811  | 3.812  | 3.951  | 3.648  |
| 5.269  | 5.345  | 5.328  | 5.553  | 5.440  | 6.522  |
| 3.013  | 3.062  | 3.645  | 3.672  | 3.399  | 3.067  |
| 6.018  | 6.119  | 5.902  | 5.968  | 6.201  | 6.193  |
| 5.818  | 5.970  | 5.839  | 5.957  | 6.177  | 5.432  |
| 6.948  | 6.962  | 7.059  | 7.145  | 7.111  | 6.625  |
| 6.147  | 6.138  | 6.172  | 6.648  | 6.146  | 7.102  |
| 6.382  | 6.690  | 6.611  | 6.705  | 6.781  | 5.703  |
| 2.464  | 3.685  | 3.220  | 3.394  | 2.889  | 2.558  |
| 6.605  | 7.049  | 6.998  | 6.707  | 6.936  | 5.789  |
| 5.153  | 5.249  | 5.213  | 5.326  | 5.622  | 3.913  |
| 5.979  | 6.706  | 6.658  | 6.127  | 6.262  | 6.982  |
| 5.833  | 5.991  | 6.045  | 6.174  | 5.861  | 6.927  |
| 8.280  | 8.885  | 8.445  | 8.478  | 8.549  | 7.892  |
| 2.306  | 2.317  | 1.907  | 1.484  | 2.156  | 2.756  |
| 5.071  | 4.611  | 4.761  | 5.133  | 5.723  | 7.311  |
| 5.586  | 6.077  | 6.043  | 5.620  | 6.129  | 6.961  |
| 4.463  | 4.893  | 4.700  | 4.566  | 4.673  | 5.535  |
| 7.957  | 8.153  | 7.935  | 7.790  | 8.040  | 7.346  |
| 6.000  | 5.457  | 5.256  | 6.301  | 5.819  | 7.359  |
| 3.075  | 2.206  | 2.316  | 2.771  | 2.427  | 1.688  |
| 5.903  | 5.768  | 5.601  | 5.875  | 5.706  | 4.745  |
| 3.839  | 4.496  | 3.899  | 3.804  | 3.785  | 4.817  |
| 5.642  | 5.423  | 5.765  | 5.706  | 5.807  | 4.832  |
| 10.054 | 10.313 | 10.136 | 10.175 | 10.329 | 9.850  |
| 9.257  | 9.169  | 9.115  | 9.012  | 9.057  | 8.405  |
| 2.705  | 2.497  | 2.577  | 2.163  | 2.267  | 3.082  |
| 9.352  | 9.300  | 9.405  | 9.442  | 9.424  | 6.520  |
| 8.021  | 8.271  | 7.915  | 7.887  | 8.267  | 6.080  |
| 6.264  | 6.033  | 5.991  | 5.901  | 6.382  | 4.321  |
| 8.375  | 8.340  | 8.402  | 8.162  | 8.066  | 7.425  |
| 2.165  | 3.197  | 2.014  | 2.981  | 2.838  | 2.184  |
| 1.561  | 1.433  | 1.666  | 2.100  | 1.741  | 1.513  |
| 9.011  | 9.345  | 9.203  | 9.164  | 9.159  | 8.543  |
| 10.707 | 10.984 | 10.850 | 10.710 | 10.963 | 10.006 |
| 5.203  | 5.201  | 5.861  | 5.516  | 5.758  | 5.037  |
| 3.545  | 3.558  | 3.626  | 3.486  | 3.634  | 4.189  |
| 9.279  | 9.582  | 9.503  | 9.272  | 9.395  | 8.673  |
| 10.003 | 9.961  | 10.182 | 9.797  | 10.265 | 9.423  |
| 9.151  | 9.222  | 9.057  | 9.025  | 9.080  | 10.013 |
| 8.426  | 8.805  | 8.693  | 8.596  | 8.873  | 7.132  |
| 9.305  | 9.451  | 9.502  | 9.273  | 9.401  | 8.188  |
| 8.951  | 9.292  | 9.377  | 9.297  | 9.170  | 7.583  |
| 5.769  | 6.232  | 6.117  | 6.208  | 6.026  | 5.269  |
| 7.965  | 8.343  | 8.271  | 7.849  | 7.919  | 6.590  |
| 4.312  | 4.398  | 4.240  | 4.625  | 4.160  | 3.941  |
| 9.185  | 9.058  | 9.210  | 9.155  | 9.155  | 9.380  |
| 8.121  | 8.030  | 7.919  | 8.007  | 8.048  | 6.834  |
| 4.687  | 5.074  | 4.724  | 5.007  | 4.623  | 3.592  |

|        |        |        |        |        |       |
|--------|--------|--------|--------|--------|-------|
| 4.162  | 4.029  | 4.225  | 3.637  | 3.487  | 5.380 |
| 6.981  | 7.053  | 7.092  | 7.031  | 7.046  | 6.936 |
| 5.563  | 5.619  | 5.659  | 5.829  | 5.628  | 5.408 |
| 7.406  | 7.590  | 7.381  | 7.330  | 7.497  | 7.187 |
| 10.032 | 10.027 | 9.970  | 9.922  | 9.764  | 6.427 |
| 3.550  | 2.989  | 2.055  | 3.083  | 3.512  | 3.314 |
| 7.951  | 7.960  | 7.806  | 7.975  | 7.606  | 6.178 |
| 8.481  | 8.953  | 8.854  | 8.743  | 8.777  | 7.867 |
| 2.045  | 2.195  | 1.843  | 2.045  | 1.978  | 2.085 |
| 2.756  | 2.548  | 3.087  | 2.700  | 3.327  | 2.647 |
| 7.259  | 7.755  | 7.455  | 7.242  | 7.218  | 6.821 |
| 5.835  | 5.923  | 6.109  | 5.849  | 6.230  | 5.615 |
| 2.188  | 2.526  | 2.440  | 3.627  | 2.182  | 2.524 |
| 7.427  | 7.767  | 7.871  | 7.377  | 7.891  | 7.841 |
| 4.728  | 4.375  | 4.502  | 4.574  | 4.543  | 4.393 |
| 6.506  | 6.417  | 6.334  | 6.556  | 6.701  | 3.952 |
| 7.951  | 7.899  | 8.582  | 8.777  | 8.554  | 6.346 |
| 6.262  | 5.752  | 5.721  | 5.714  | 5.873  | 7.277 |
| 7.269  | 7.564  | 7.587  | 7.295  | 7.324  | 6.235 |
| 3.993  | 3.237  | 3.320  | 3.083  | 3.478  | 2.066 |
| 3.853  | 4.185  | 3.718  | 4.215  | 4.265  | 4.578 |
| 6.509  | 6.620  | 6.622  | 6.343  | 6.521  | 4.960 |
| 2.628  | 2.886  | 2.432  | 3.637  | 2.456  | 2.430 |
| 4.545  | 3.925  | 4.101  | 3.788  | 4.348  | 4.413 |
| 7.840  | 8.072  | 7.955  | 7.854  | 8.040  | 7.155 |
| 7.529  | 7.642  | 7.674  | 7.482  | 7.720  | 6.048 |
| 4.092  | 4.263  | 3.688  | 3.374  | 3.357  | 3.956 |
| 3.126  | 3.580  | 4.326  | 2.784  | 3.223  | 2.438 |
| 2.937  | 3.336  | 3.283  | 3.283  | 2.952  | 3.186 |
| 3.019  | 3.376  | 2.065  | 2.591  | 2.992  | 1.842 |
| 7.034  | 7.281  | 7.133  | 7.167  | 7.283  | 8.593 |
| 3.472  | 3.284  | 3.669  | 3.712  | 3.541  | 4.211 |
| 2.095  | 3.037  | 2.675  | 2.937  | 3.077  | 3.417 |
| 1.951  | 2.240  | 2.199  | 2.220  | 2.095  | 3.423 |
| 4.866  | 4.509  | 5.221  | 4.797  | 4.629  | 4.404 |
| 5.673  | 4.633  | 5.797  | 4.580  | 5.537  | 5.338 |
| 6.028  | 6.060  | 6.146  | 5.764  | 5.909  | 4.773 |
| 5.833  | 5.811  | 5.894  | 5.670  | 6.091  | 4.388 |
| 6.014  | 6.151  | 6.190  | 6.057  | 6.143  | 4.720 |
| 8.874  | 8.404  | 8.691  | 8.770  | 8.585  | 7.023 |
| 6.435  | 5.514  | 6.051  | 5.688  | 5.907  | 4.083 |
| 4.337  | 5.193  | 4.439  | 4.466  | 4.939  | 3.744 |
| 3.369  | 3.289  | 3.506  | 3.636  | 3.370  | 3.384 |
| 6.741  | 6.023  | 6.402  | 6.640  | 5.887  | 4.957 |
| 4.943  | 4.683  | 4.839  | 5.265  | 5.388  | 6.174 |
| 6.957  | 6.990  | 7.003  | 6.893  | 6.894  | 5.436 |
| 4.109  | 3.928  | 4.004  | 3.798  | 4.502  | 4.736 |
| 1.737  | 1.179  | 1.578  | 1.323  | 1.559  | 1.528 |
| 9.969  | 9.887  | 10.130 | 10.067 | 10.114 | 7.448 |
| 3.827  | 2.755  | 3.409  | 3.376  | 3.849  | 2.927 |

|       |       |       |       |       |       |
|-------|-------|-------|-------|-------|-------|
| 3.970 | 3.769 | 3.908 | 3.610 | 3.656 | 3.997 |
| 4.265 | 4.264 | 4.497 | 4.241 | 4.483 | 4.914 |
| 7.270 | 6.894 | 6.858 | 7.286 | 7.238 | 8.084 |
| 3.408 | 3.361 | 3.760 | 3.382 | 3.197 | 4.544 |
| 5.588 | 5.375 | 5.947 | 5.742 | 5.547 | 5.412 |
| 7.201 | 8.103 | 7.748 | 7.821 | 7.728 | 6.701 |
| 5.418 | 5.388 | 5.079 | 5.321 | 5.417 | 6.268 |
| 6.523 | 6.253 | 6.127 | 6.637 | 6.506 | 6.852 |
| 3.977 | 3.720 | 4.020 | 4.383 | 3.883 | 4.448 |
| 5.360 | 5.605 | 5.246 | 6.085 | 6.071 | 7.338 |
| 5.163 | 4.959 | 5.072 | 4.597 | 4.622 | 4.042 |
| 5.680 | 6.603 | 6.495 | 6.165 | 6.366 | 5.690 |
| 3.259 | 3.787 | 3.055 | 3.453 | 3.759 | 2.625 |
| 2.818 | 2.559 | 3.053 | 3.032 | 3.464 | 3.367 |
| 6.077 | 5.805 | 6.240 | 6.215 | 6.201 | 3.095 |
| 4.949 | 5.047 | 5.014 | 4.812 | 5.391 | 2.495 |
| 5.950 | 5.926 | 5.966 | 6.151 | 6.005 | 6.859 |
| 3.484 | 3.314 | 3.371 | 3.090 | 3.108 | 2.849 |
| 3.861 | 3.836 | 3.813 | 4.033 | 3.861 | 3.644 |
| 8.055 | 7.850 | 7.647 | 7.595 | 7.665 | 7.614 |
| 2.686 | 2.436 | 2.531 | 2.239 | 2.323 | 2.279 |
| 6.406 | 5.824 | 6.623 | 6.389 | 6.399 | 5.361 |
| 3.151 | 3.455 | 3.793 | 4.021 | 3.755 | 4.191 |
| 2.520 | 3.366 | 4.441 | 2.142 | 2.379 | 2.050 |
| 5.462 | 4.729 | 4.820 | 5.077 | 5.092 | 5.149 |
| 4.256 | 4.470 | 4.190 | 4.328 | 4.729 | 4.196 |
| 5.252 | 4.962 | 4.880 | 5.049 | 5.367 | 4.569 |
| 3.716 | 4.153 | 3.368 | 3.882 | 3.780 | 4.738 |
| 3.132 | 3.147 | 3.059 | 3.371 | 3.963 | 4.535 |
| 4.039 | 3.415 | 4.328 | 3.664 | 3.855 | 3.161 |
| 3.930 | 3.479 | 3.457 | 2.195 | 3.125 | 1.940 |
| 3.359 | 2.988 | 3.819 | 2.671 | 3.500 | 2.131 |
| 4.881 | 5.349 | 4.565 | 5.314 | 5.520 | 4.249 |
| 6.564 | 7.048 | 7.134 | 7.173 | 7.115 | 5.843 |
| 5.908 | 5.661 | 5.436 | 6.167 | 6.664 | 7.366 |
| 2.618 | 4.038 | 3.397 | 2.518 | 2.400 | 2.409 |
| 9.514 | 9.616 | 9.690 | 9.405 | 9.591 | 8.130 |
| 5.441 | 5.164 | 5.301 | 5.261 | 4.864 | 4.506 |
| 5.782 | 5.823 | 5.979 | 5.735 | 5.705 | 4.387 |
| 7.149 | 7.001 | 7.362 | 6.761 | 7.097 | 5.787 |
| 3.098 | 3.320 | 3.655 | 2.667 | 2.355 | 3.206 |
| 6.700 | 6.554 | 6.584 | 5.987 | 6.498 | 5.497 |
| 3.345 | 3.194 | 2.627 | 2.917 | 3.165 | 2.454 |
| 2.977 | 2.873 | 3.231 | 3.344 | 2.910 | 3.264 |
| 7.466 | 7.583 | 7.321 | 7.303 | 7.661 | 6.873 |
| 7.262 | 7.649 | 7.436 | 7.613 | 7.515 | 8.807 |
| 3.007 | 3.355 | 3.107 | 3.654 | 2.744 | 3.134 |
| 5.483 | 4.660 | 5.053 | 4.717 | 4.862 | 3.506 |
| 4.263 | 4.660 | 4.682 | 4.450 | 3.773 | 4.999 |
| 3.702 | 3.738 | 3.155 | 3.524 | 3.807 | 3.059 |

|       |       |       |       |       |       |
|-------|-------|-------|-------|-------|-------|
| 3.105 | 2.229 | 2.879 | 2.551 | 3.426 | 3.336 |
| 2.547 | 2.417 | 1.728 | 3.312 | 2.896 | 4.546 |
| 3.008 | 3.776 | 3.964 | 3.149 | 2.942 | 4.839 |
| 4.246 | 4.747 | 4.273 | 4.182 | 5.104 | 3.724 |
| 6.860 | 7.036 | 6.822 | 6.876 | 6.975 | 7.572 |
| 2.956 | 3.530 | 3.845 | 4.001 | 4.092 | 3.049 |
| 4.358 | 3.759 | 4.095 | 4.156 | 4.295 | 2.538 |
| 4.494 | 1.773 | 2.174 | 2.843 | 3.620 | 0.924 |
| 5.689 | 4.284 | 3.720 | 4.530 | 4.647 | 3.955 |
| 4.545 | 3.468 | 3.629 | 4.131 | 4.075 | 4.811 |
| 4.867 | 3.957 | 4.658 | 4.094 | 4.747 | 5.136 |
| 2.171 | 1.688 | 2.245 | 2.927 | 2.908 | 3.017 |
| 5.652 | 5.414 | 5.528 | 5.878 | 5.473 | 3.843 |
| 9.463 | 9.687 | 9.428 | 9.421 | 9.386 | 8.679 |
| 6.240 | 6.100 | 6.871 | 6.738 | 6.225 | 5.697 |
| 3.560 | 4.927 | 4.451 | 4.124 | 3.733 | 2.945 |
| 3.219 | 1.798 | 2.678 | 4.072 | 2.774 | 3.788 |
| 2.993 | 2.696 | 2.513 | 2.501 | 2.451 | 3.919 |
| 3.612 | 3.167 | 3.366 | 3.833 | 3.032 | 4.353 |
| 5.136 | 4.900 | 5.349 | 5.625 | 5.816 | 7.370 |
| 4.470 | 4.679 | 4.919 | 4.397 | 4.700 | 4.107 |
| 7.595 | 7.677 | 7.570 | 7.708 | 7.639 | 7.008 |
| 6.677 | 6.951 | 6.858 | 6.949 | 6.765 | 6.505 |
| 2.551 | 3.678 | 2.715 | 3.100 | 2.744 | 2.656 |
| 1.854 | 1.841 | 2.107 | 2.284 | 1.980 | 2.702 |
| 7.673 | 8.130 | 7.873 | 7.966 | 7.893 | 7.383 |
| 7.286 | 6.760 | 6.810 | 7.093 | 7.140 | 5.158 |
| 7.214 | 6.616 | 6.901 | 7.196 | 7.217 | 6.100 |
| 4.688 | 5.077 | 4.729 | 4.764 | 4.685 | 4.055 |
| 5.312 | 5.069 | 5.370 | 5.277 | 5.162 | 4.301 |
| 7.215 | 7.216 | 7.343 | 7.487 | 7.383 | 6.134 |
| 6.151 | 6.234 | 6.330 | 5.998 | 6.221 | 5.625 |
| 7.268 | 7.176 | 7.096 | 7.157 | 7.151 | 4.446 |
| 3.208 | 3.983 | 3.402 | 2.942 | 2.887 | 2.908 |
| 2.386 | 2.680 | 2.482 | 2.428 | 2.970 | 2.301 |
| 5.500 | 5.287 | 5.791 | 4.990 | 5.636 | 5.125 |
| 6.821 | 6.367 | 6.695 | 6.617 | 6.327 | 5.670 |
| 4.596 | 5.308 | 4.798 | 4.732 | 4.928 | 4.723 |
| 1.889 | 2.238 | 2.043 | 1.749 | 2.771 | 2.848 |
| 2.649 | 2.434 | 2.354 | 2.708 | 2.686 | 2.745 |
| 2.871 | 2.150 | 2.512 | 2.045 | 2.808 | 3.439 |
| 6.896 | 6.556 | 6.800 | 6.853 | 6.787 | 7.262 |
| 5.565 | 5.727 | 5.217 | 5.020 | 5.367 | 3.981 |
| 4.676 | 4.703 | 4.650 | 5.149 | 4.639 | 5.274 |
| 7.218 | 6.716 | 6.847 | 6.785 | 6.690 | 5.942 |
| 7.825 | 6.925 | 6.869 | 6.635 | 7.607 | 7.389 |
| 2.726 | 3.594 | 3.164 | 3.159 | 3.088 | 3.646 |
| 3.515 | 3.624 | 3.617 | 3.360 | 3.556 | 4.448 |
| 8.059 | 8.126 | 8.183 | 8.092 | 7.962 | 7.404 |
| 5.369 | 5.367 | 5.399 | 5.308 | 5.628 | 7.176 |

|       |       |       |       |       |       |
|-------|-------|-------|-------|-------|-------|
| 2.456 | 2.128 | 2.219 | 2.355 | 2.033 | 3.768 |
| 5.585 | 5.594 | 5.336 | 5.448 | 4.995 | 4.228 |
| 4.937 | 5.122 | 4.596 | 4.973 | 4.926 | 3.438 |
| 6.193 | 6.449 | 7.204 | 5.363 | 6.002 | 6.219 |
| 1.806 | 1.515 | 1.702 | 2.429 | 1.356 | 4.612 |
| 4.458 | 4.639 | 4.304 | 3.925 | 5.218 | 5.325 |
| 2.249 | 2.510 | 2.184 | 2.359 | 2.068 | 3.931 |
| 3.261 | 2.957 | 3.057 | 3.180 | 2.820 | 4.802 |
| 2.940 | 2.776 | 3.199 | 3.217 | 3.205 | 2.833 |
| 2.565 | 3.605 | 2.980 | 2.470 | 3.255 | 1.352 |
| 4.016 | 3.627 | 3.709 | 2.800 | 2.452 | 3.793 |
| 3.063 | 4.215 | 3.729 | 3.449 | 3.413 | 4.375 |
| 5.437 | 6.086 | 6.187 | 5.613 | 5.911 | 5.518 |
| 3.073 | 3.892 | 3.879 | 4.277 | 4.304 | 5.735 |
| 4.326 | 4.906 | 4.557 | 4.413 | 4.796 | 5.322 |
| 2.986 | 2.632 | 3.298 | 3.050 | 3.828 | 3.868 |
| 2.374 | 3.266 | 2.796 | 3.498 | 3.511 | 3.845 |
| 3.290 | 2.642 | 3.309 | 3.158 | 2.814 | 2.927 |
| 4.746 | 4.165 | 4.292 | 4.638 | 4.681 | 3.921 |
| 4.549 | 4.657 | 4.858 | 4.844 | 4.709 | 3.822 |
| 7.636 | 7.470 | 7.849 | 7.166 | 7.425 | 3.223 |
| 1.142 | 1.171 | 1.382 | 0.975 | 1.164 | 1.502 |
| 3.645 | 3.174 | 2.769 | 2.655 | 2.930 | 2.769 |
| 3.217 | 2.590 | 3.340 | 1.836 | 2.796 | 1.517 |
| 6.719 | 6.767 | 6.935 | 6.679 | 6.917 | 5.936 |
| 6.557 | 6.357 | 6.926 | 6.783 | 6.318 | 6.062 |
| 5.305 | 5.339 | 5.790 | 5.287 | 5.603 | 4.765 |
| 4.601 | 4.583 | 4.469 | 4.478 | 4.304 | 4.239 |
| 2.664 | 2.133 | 2.803 | 2.803 | 2.416 | 2.965 |
| 3.718 | 4.201 | 4.124 | 4.352 | 4.164 | 4.901 |
| 6.696 | 6.323 | 6.662 | 6.444 | 6.270 | 6.461 |
| 2.828 | 3.555 | 3.419 | 3.245 | 3.667 | 2.316 |
| 4.536 | 4.705 | 4.756 | 4.651 | 4.667 | 3.703 |
| 4.984 | 4.528 | 5.304 | 4.414 | 4.488 | 1.554 |
| 5.603 | 6.472 | 5.763 | 6.006 | 5.891 | 5.187 |
| 3.291 | 4.299 | 3.559 | 3.976 | 3.751 | 1.688 |
| 3.659 | 3.341 | 3.495 | 4.117 | 3.837 | 3.469 |
| 3.566 | 3.307 | 2.910 | 3.289 | 3.348 | 3.680 |
| 6.398 | 6.358 | 6.123 | 6.241 | 6.444 | 6.047 |
| 5.539 | 5.589 | 5.129 | 5.669 | 5.369 | 4.380 |
| 4.581 | 4.412 | 5.432 | 5.194 | 5.133 | 4.650 |
| 6.135 | 6.084 | 6.528 | 6.246 | 6.398 | 5.564 |
| 7.675 | 7.748 | 7.890 | 7.641 | 7.828 | 7.015 |
| 5.828 | 6.039 | 5.789 | 6.074 | 5.722 | 5.123 |
| 7.638 | 7.717 | 7.594 | 7.408 | 7.618 | 7.405 |
| 6.143 | 6.302 | 6.398 | 6.024 | 6.108 | 4.823 |
| 4.827 | 3.704 | 3.944 | 4.379 | 4.413 | 4.873 |
| 3.418 | 4.049 | 3.613 | 3.262 | 3.366 | 3.097 |
| 5.226 | 4.566 | 5.401 | 4.938 | 5.097 | 4.494 |
| 3.127 | 3.512 | 3.628 | 3.742 | 3.445 | 2.731 |



|       |       |       |       |       |       |
|-------|-------|-------|-------|-------|-------|
| 2.738 | 2.661 | 2.708 | 2.761 | 2.306 | 1.695 |
| 5.807 | 5.387 | 5.360 | 5.448 | 5.435 | 3.896 |
| 3.459 | 3.475 | 4.084 | 3.982 | 4.145 | 3.198 |
| 5.593 | 6.187 | 6.168 | 5.593 | 6.098 | 6.346 |
| 5.837 | 6.284 | 6.329 | 6.147 | 6.219 | 5.149 |
| 3.226 | 3.867 | 4.145 | 3.404 | 3.812 | 1.949 |
| 4.573 | 4.807 | 5.012 | 4.814 | 5.651 | 4.537 |
| 3.512 | 4.197 | 4.012 | 4.278 | 4.000 | 3.403 |
| 6.571 | 6.611 | 6.532 | 6.631 | 6.594 | 5.543 |
| 2.866 | 3.513 | 2.734 | 3.223 | 3.588 | 3.691 |
| 3.962 | 4.173 | 3.673 | 4.013 | 4.293 | 4.914 |
| 4.601 | 4.641 | 4.564 | 4.420 | 4.827 | 3.762 |
| 2.822 | 3.788 | 2.893 | 3.079 | 3.226 | 3.726 |
| 4.315 | 3.948 | 3.699 | 3.832 | 4.214 | 3.255 |
| 2.478 | 1.469 | 2.540 | 2.256 | 2.261 | 2.471 |
| 2.585 | 2.636 | 2.528 | 2.290 | 2.399 | 2.813 |
| 3.730 | 3.923 | 3.836 | 2.833 | 3.711 | 4.539 |
| 2.595 | 3.661 | 3.356 | 2.712 | 3.371 | 4.040 |
| 2.871 | 2.064 | 2.390 | 2.834 | 2.349 | 3.029 |
| 2.246 | 2.863 | 3.085 | 2.443 | 2.100 | 1.374 |
| 3.659 | 4.512 | 3.825 | 3.539 | 4.188 | 4.651 |
| 3.071 | 2.185 | 2.422 | 1.914 | 2.396 | 2.607 |
| 5.731 | 5.935 | 6.008 | 6.128 | 6.005 | 6.523 |
| 2.546 | 2.120 | 2.580 | 2.812 | 2.800 | 3.812 |
| 8.086 | 8.219 | 8.292 | 7.357 | 7.689 | 3.672 |
| 1.273 | 1.241 | 1.291 | 0.920 | 1.012 | 1.561 |
| 5.391 | 4.383 | 4.932 | 4.394 | 4.559 | 4.984 |
| 4.408 | 3.917 | 3.303 | 4.361 | 3.997 | 4.320 |
| 3.135 | 2.977 | 3.520 | 3.183 | 2.997 | 3.048 |
| 5.128 | 5.235 | 5.134 | 5.317 | 5.345 | 6.695 |
| 6.422 | 6.492 | 6.298 | 6.420 | 6.171 | 5.959 |
| 4.651 | 4.468 | 4.235 | 4.221 | 4.224 | 3.188 |
| 2.846 | 2.870 | 2.739 | 3.297 | 2.772 | 2.763 |
| 2.197 | 1.956 | 1.927 | 2.292 | 2.283 | 3.100 |
| 3.263 | 3.263 | 2.977 | 3.263 | 2.971 | 3.556 |
| 4.927 | 4.501 | 5.186 | 4.982 | 5.255 | 4.668 |
| 4.484 | 4.120 | 3.828 | 3.281 | 3.902 | 4.801 |
| 5.044 | 5.007 | 5.307 | 5.457 | 5.219 | 6.600 |
| 3.690 | 4.235 | 4.442 | 3.865 | 4.422 | 2.791 |
| 4.223 | 4.391 | 4.201 | 4.522 | 3.885 | 4.175 |
| 1.624 | 2.189 | 1.626 | 1.127 | 1.654 | 2.045 |
| 1.988 | 2.104 | 2.099 | 1.999 | 2.538 | 3.082 |
| 4.128 | 4.692 | 4.328 | 4.439 | 4.737 | 4.199 |
| 2.586 | 2.788 | 3.585 | 2.173 | 2.035 | 3.235 |
| 5.982 | 6.425 | 6.741 | 5.182 | 5.469 | 6.236 |
| 6.471 | 6.772 | 6.913 | 5.843 | 5.903 | 6.570 |
| 3.766 | 3.502 | 3.793 | 3.526 | 3.681 | 4.942 |
| 6.260 | 4.520 | 5.643 | 5.316 | 5.324 | 4.225 |
| 8.438 | 8.730 | 8.947 | 8.289 | 8.385 | 5.091 |
| 1.755 | 1.895 | 1.751 | 1.683 | 1.987 | 2.322 |

|       |       |       |       |       |       |
|-------|-------|-------|-------|-------|-------|
| 5.837 | 5.552 | 5.967 | 6.156 | 6.102 | 4.436 |
| 3.477 | 3.185 | 3.103 | 3.653 | 2.962 | 3.610 |
| 2.419 | 2.293 | 2.497 | 2.332 | 1.972 | 2.114 |
| 3.993 | 4.203 | 4.314 | 3.175 | 3.626 | 3.422 |
| 3.885 | 4.272 | 3.832 | 3.449 | 3.892 | 3.400 |
| 5.294 | 5.389 | 5.612 | 4.685 | 4.937 | 4.792 |
| 3.225 | 3.702 | 3.776 | 3.033 | 3.079 | 3.300 |
| 3.340 | 3.782 | 3.884 | 3.153 | 3.141 | 3.388 |
| 3.364 | 3.779 | 3.858 | 3.117 | 3.082 | 3.390 |
| 3.275 | 3.839 | 4.040 | 3.151 | 3.225 | 3.349 |
| 3.431 | 4.183 | 4.049 | 2.933 | 3.132 | 3.559 |
| 2.890 | 3.162 | 2.982 | 3.064 | 3.344 | 3.972 |
| 3.002 | 2.754 | 2.794 | 2.379 | 2.890 | 2.472 |
| 4.918 | 3.820 | 4.059 | 4.471 | 3.749 | 2.610 |
| 2.478 | 2.925 | 2.232 | 2.044 | 2.092 | 2.681 |
| 3.626 | 2.284 | 3.682 | 3.599 | 3.080 | 3.347 |
| 2.461 | 2.959 | 1.732 | 2.481 | 2.000 | 5.976 |
| 2.588 | 2.967 | 3.145 | 2.499 | 2.459 | 3.188 |
| 3.324 | 3.530 | 3.306 | 2.525 | 3.131 | 4.194 |
| 2.546 | 3.361 | 3.655 | 3.213 | 3.746 | 4.132 |
| 3.190 | 3.895 | 3.536 | 4.157 | 3.747 | 5.619 |
| 4.365 | 3.512 | 3.888 | 3.064 | 3.093 | 1.670 |
| 5.181 | 3.971 | 5.354 | 5.220 | 4.623 | 5.330 |
| 2.928 | 2.832 | 2.810 | 3.522 | 3.406 | 4.058 |
| 3.047 | 2.704 | 2.572 | 2.942 | 2.706 | 4.288 |
| 6.450 | 6.369 | 6.529 | 6.149 | 6.198 | 6.759 |
| 3.147 | 3.742 | 4.104 | 3.881 | 3.260 | 2.773 |
| 7.452 | 7.215 | 7.512 | 7.671 | 6.963 | 6.797 |
| 3.180 | 4.315 | 4.024 | 3.889 | 3.601 | 2.110 |
| 2.956 | 2.454 | 2.919 | 2.564 | 2.717 | 3.288 |
| 3.683 | 3.867 | 4.196 | 3.617 | 3.443 | 2.627 |
| 4.514 | 4.967 | 5.021 | 5.014 | 5.192 | 6.118 |
| 5.196 | 5.767 | 5.555 | 5.293 | 5.505 | 5.099 |
| 6.106 | 5.699 | 5.705 | 5.984 | 5.945 | 5.379 |
| 6.271 | 6.389 | 6.462 | 6.281 | 5.874 | 2.871 |
| 3.080 | 3.007 | 2.964 | 3.436 | 3.840 | 4.750 |
| 2.607 | 2.342 | 2.363 | 2.566 | 2.442 | 3.678 |
| 6.967 | 8.035 | 7.877 | 7.023 | 7.235 | 9.190 |
| 2.777 | 3.225 | 3.635 | 2.607 | 3.042 | 3.230 |
| 5.617 | 5.648 | 5.977 | 6.052 | 5.788 | 4.708 |
| 5.469 | 5.606 | 5.499 | 5.800 | 5.838 | 5.570 |
| 2.905 | 2.842 | 3.527 | 2.625 | 3.072 | 1.880 |
| 4.190 | 3.564 | 3.685 | 4.281 | 3.925 | 3.866 |
| 4.358 | 4.080 | 4.348 | 4.938 | 4.316 | 4.762 |
| 3.212 | 2.579 | 3.425 | 3.359 | 3.161 | 1.971 |
| 5.953 | 6.507 | 6.747 | 6.237 | 6.120 | 1.517 |
| 5.005 | 6.204 | 5.942 | 5.554 | 5.469 | 7.457 |
| 5.221 | 6.504 | 6.237 | 5.860 | 5.765 | 7.784 |
| 4.990 | 6.397 | 6.070 | 5.565 | 5.631 | 7.653 |
| 5.103 | 6.504 | 6.198 | 5.670 | 5.731 | 7.759 |

|       |       |       |       |       |       |
|-------|-------|-------|-------|-------|-------|
| 5.184 | 6.512 | 6.233 | 5.572 | 5.752 | 7.772 |
| 5.184 | 6.514 | 6.201 | 5.572 | 5.764 | 7.774 |
| 5.248 | 6.526 | 6.267 | 5.903 | 5.803 | 7.794 |
| 4.861 | 5.797 | 5.556 | 5.235 | 5.081 | 7.000 |
| 4.992 | 5.953 | 5.686 | 5.256 | 5.178 | 7.082 |
| 2.409 | 2.268 | 2.943 | 2.149 | 3.217 | 2.361 |
| 3.416 | 3.416 | 3.602 | 3.725 | 3.777 | 4.208 |
| 2.439 | 2.247 | 2.282 | 2.670 | 1.947 | 2.680 |
| 3.337 | 4.043 | 4.240 | 4.177 | 4.092 | 2.319 |
| 3.364 | 3.660 | 3.239 | 4.047 | 3.899 | 4.674 |
| 5.068 | 3.090 | 3.847 | 2.596 | 3.852 | 2.513 |
| 3.261 | 2.517 | 3.055 | 2.476 | 2.112 | 2.359 |
| 6.061 | 6.741 | 6.594 | 6.496 | 6.714 | 5.846 |
| 2.617 | 3.679 | 3.299 | 3.249 | 3.008 | 4.562 |
| 5.258 | 5.429 | 5.392 | 5.583 | 5.044 | 4.804 |
| 2.850 | 3.435 | 3.141 | 2.958 | 2.786 | 1.548 |
| 2.090 | 2.498 | 1.627 | 2.319 | 1.856 | 3.628 |
| 4.857 | 4.963 | 5.267 | 4.246 | 4.675 | 3.761 |
| 2.325 | 3.946 | 3.558 | 3.591 | 4.316 | 3.443 |
| 2.928 | 2.951 | 2.278 | 2.976 | 2.692 | 3.851 |
| 3.207 | 2.984 | 3.419 | 3.524 | 3.347 | 5.510 |
| 7.243 | 7.487 | 7.313 | 7.293 | 7.368 | 6.436 |
| 5.620 | 6.580 | 6.120 | 6.076 | 6.352 | 5.415 |
| 6.538 | 6.420 | 5.421 | 6.357 | 6.416 | 5.366 |
| 3.547 | 3.534 | 3.657 | 3.549 | 3.810 | 2.409 |
| 5.368 | 5.533 | 5.690 | 5.451 | 5.762 | 4.473 |
| 2.971 | 3.069 | 2.214 | 2.294 | 1.758 | 2.202 |
| 7.713 | 8.233 | 7.960 | 7.885 | 7.974 | 8.916 |
| 6.178 | 6.756 | 6.478 | 6.291 | 6.563 | 7.323 |
| 6.713 | 7.273 | 6.852 | 6.670 | 6.927 | 7.955 |
| 6.553 | 6.870 | 6.661 | 6.447 | 6.789 | 7.324 |
| 6.411 | 6.963 | 6.671 | 6.472 | 6.915 | 7.739 |
| 6.545 | 6.904 | 6.636 | 6.474 | 6.791 | 7.281 |
| 4.624 | 4.203 | 4.662 | 4.526 | 4.597 | 4.224 |
| 4.474 | 4.914 | 4.890 | 5.216 | 4.892 | 5.398 |
| 5.553 | 4.744 | 5.070 | 4.874 | 4.261 | 3.455 |
| 2.075 | 2.551 | 2.544 | 2.186 | 2.510 | 3.045 |
| 1.133 | 1.475 | 1.370 | 1.002 | 1.340 | 1.368 |
| 5.961 | 6.085 | 6.390 | 6.005 | 6.184 | 5.120 |
| 2.842 | 2.938 | 3.436 | 3.014 | 3.439 | 3.521 |
| 3.818 | 3.457 | 3.427 | 4.194 | 3.747 | 3.239 |
| 2.576 | 2.903 | 2.445 | 3.249 | 2.766 | 3.066 |
| 2.072 | 1.417 | 2.090 | 1.415 | 1.599 | 3.010 |
| 1.998 | 3.007 | 2.431 | 2.177 | 2.500 | 2.545 |
| 2.799 | 3.021 | 3.423 | 2.684 | 3.125 | 2.519 |
| 5.256 | 5.082 | 5.074 | 5.665 | 5.192 | 6.307 |
| 2.810 | 2.715 | 3.807 | 3.537 | 2.587 | 4.712 |
| 6.019 | 5.837 | 5.853 | 5.896 | 5.546 | 5.598 |
| 2.606 | 1.707 | 1.993 | 2.242 | 2.243 | 3.250 |
| 3.883 | 3.219 | 3.200 | 3.608 | 3.216 | 3.972 |

|       |       |        |       |       |       |
|-------|-------|--------|-------|-------|-------|
| 1.870 | 1.902 | 2.008  | 1.643 | 2.020 | 1.792 |
| 3.774 | 4.052 | 4.649  | 3.913 | 4.032 | 2.348 |
| 4.422 | 4.342 | 4.848  | 4.780 | 4.942 | 5.172 |
| 2.918 | 2.003 | 1.983  | 2.050 | 1.934 | 1.686 |
| 4.217 | 4.483 | 3.735  | 4.019 | 4.125 | 3.066 |
| 2.503 | 2.541 | 2.472  | 3.497 | 2.918 | 4.033 |
| 5.324 | 4.676 | 5.320  | 4.896 | 4.987 | 4.210 |
| 3.751 | 3.751 | 4.152  | 4.102 | 3.891 | 3.331 |
| 3.840 | 4.009 | 3.945  | 4.302 | 4.121 | 5.014 |
| 5.813 | 5.451 | 6.014  | 5.324 | 5.609 | 4.931 |
| 3.008 | 2.545 | 2.590  | 2.074 | 2.725 | 2.672 |
| 4.565 | 4.578 | 4.272  | 4.324 | 4.664 | 4.538 |
| 7.038 | 7.209 | 6.971  | 6.876 | 7.298 | 5.379 |
| 7.750 | 7.853 | 7.803  | 7.587 | 7.802 | 6.413 |
| 9.183 | 8.882 | 9.078  | 9.054 | 8.966 | 5.989 |
| 4.661 | 3.736 | 3.814  | 3.886 | 4.350 | 3.582 |
| 2.675 | 3.572 | 3.211  | 4.069 | 4.252 | 5.535 |
| 5.484 | 5.173 | 5.613  | 5.408 | 5.456 | 6.324 |
| 3.972 | 3.465 | 3.916  | 3.737 | 3.411 | 2.712 |
| 5.479 | 5.288 | 4.497  | 5.294 | 5.174 | 5.454 |
| 4.702 | 3.781 | 4.702  | 4.702 | 4.596 | 3.870 |
| 4.876 | 4.637 | 4.951  | 4.161 | 4.606 | 1.104 |
| 5.218 | 5.289 | 5.287  | 5.261 | 5.078 | 4.885 |
| 5.399 | 5.279 | 5.695  | 5.608 | 5.574 | 5.315 |
| 6.969 | 6.233 | 6.604  | 7.203 | 6.758 | 5.775 |
| 5.304 | 5.737 | 5.658  | 5.116 | 5.713 | 4.905 |
| 6.090 | 5.891 | 5.623  | 6.167 | 6.098 | 3.197 |
| 3.031 | 3.466 | 3.611  | 3.836 | 3.168 | 4.464 |
| 5.698 | 5.569 | 5.666  | 5.586 | 5.505 | 5.069 |
| 7.398 | 7.335 | 7.281  | 7.408 | 7.361 | 5.902 |
| 6.473 | 6.469 | 6.460  | 6.320 | 6.149 | 5.190 |
| 5.979 | 5.767 | 5.857  | 5.661 | 5.903 | 4.802 |
| 3.026 | 2.496 | 2.816  | 2.026 | 2.737 | 1.833 |
| 6.054 | 5.631 | 5.707  | 6.239 | 5.664 | 5.313 |
| 7.106 | 6.691 | 7.060  | 6.731 | 6.822 | 6.052 |
| 3.919 | 3.781 | 3.858  | 3.505 | 3.590 | 3.058 |
| 4.085 | 4.013 | 4.243  | 3.487 | 4.180 | 3.412 |
| 5.775 | 5.690 | 5.390  | 5.402 | 5.890 | 3.034 |
| 8.128 | 7.993 | 8.161  | 8.037 | 7.722 | 7.162 |
| 5.392 | 5.654 | 5.369  | 5.412 | 5.838 | 5.232 |
| 7.435 | 7.258 | 7.175  | 7.287 | 7.056 | 5.568 |
| 7.411 | 7.494 | 7.408  | 7.389 | 7.489 | 5.393 |
| 7.290 | 7.184 | 7.327  | 6.917 | 7.035 | 4.892 |
| 4.878 | 4.786 | 4.314  | 4.761 | 4.722 | 3.208 |
| 8.011 | 8.288 | 8.137  | 8.216 | 8.282 | 6.431 |
| 7.530 | 7.753 | 7.652  | 7.287 | 7.660 | 4.998 |
| 9.807 | 9.590 | 10.137 | 9.556 | 9.984 | 6.707 |
| 5.395 | 5.164 | 5.788  | 5.649 | 6.001 | 5.512 |
| 2.116 | 2.755 | 2.864  | 2.352 | 2.365 | 1.686 |
| 5.633 | 5.582 | 5.518  | 5.844 | 5.440 | 2.246 |

|        |        |        |        |        |       |
|--------|--------|--------|--------|--------|-------|
| 8.131  | 8.266  | 8.203  | 8.293  | 8.164  | 7.265 |
| 8.830  | 8.846  | 8.958  | 8.697  | 8.853  | 7.509 |
| 5.856  | 6.184  | 6.006  | 5.549  | 5.535  | 4.737 |
| 8.586  | 8.597  | 8.529  | 8.674  | 8.570  | 7.532 |
| 7.743  | 7.930  | 7.877  | 8.247  | 7.962  | 4.692 |
| 4.439  | 4.388  | 4.920  | 4.501  | 4.955  | 5.804 |
| 6.915  | 7.342  | 7.216  | 6.426  | 6.925  | 7.465 |
| 6.422  | 6.502  | 6.564  | 6.159  | 6.267  | 9.350 |
| 5.369  | 4.992  | 4.932  | 5.283  | 4.648  | 6.703 |
| 3.809  | 3.994  | 3.853  | 3.761  | 3.616  | 2.545 |
| 3.368  | 3.820  | 3.916  | 3.725  | 3.408  | 3.367 |
| 4.937  | 5.040  | 5.282  | 5.117  | 5.133  | 4.305 |
| 5.921  | 6.190  | 6.084  | 5.836  | 5.830  | 4.867 |
| 4.919  | 4.945  | 4.830  | 5.032  | 4.729  | 4.018 |
| 8.314  | 8.317  | 8.026  | 8.171  | 8.300  | 6.438 |
| 7.583  | 7.490  | 7.462  | 7.122  | 7.287  | 4.423 |
| 10.768 | 10.008 | 10.643 | 10.734 | 10.343 | 7.429 |
| 8.764  | 8.140  | 8.576  | 8.704  | 8.661  | 6.885 |
| 7.208  | 7.310  | 7.413  | 7.546  | 7.410  | 6.277 |
| 7.627  | 8.068  | 7.658  | 7.958  | 7.929  | 7.537 |
| 8.409  | 8.425  | 8.396  | 8.173  | 8.315  | 7.069 |
| 5.453  | 6.067  | 5.744  | 5.701  | 5.718  | 5.527 |
| 6.865  | 6.751  | 6.990  | 7.134  | 7.172  | 4.545 |
| 6.584  | 6.532  | 6.763  | 6.379  | 6.652  | 4.235 |
| 7.547  | 7.658  | 7.711  | 7.671  | 7.849  | 4.830 |
| 7.991  | 7.965  | 8.030  | 7.913  | 7.938  | 3.715 |
| 9.369  | 9.482  | 9.320  | 9.321  | 9.314  | 8.540 |
| 4.335  | 4.323  | 4.325  | 4.353  | 4.445  | 2.704 |
| 7.861  | 7.730  | 7.742  | 8.122  | 7.910  | 7.446 |
| 7.909  | 7.591  | 7.861  | 7.674  | 7.780  | 6.210 |
| 6.955  | 7.215  | 7.176  | 7.093  | 7.060  | 6.326 |
| 9.560  | 9.710  | 9.693  | 9.714  | 9.784  | 7.234 |
| 2.784  | 2.851  | 2.811  | 2.565  | 2.162  | 3.007 |
| 1.820  | 2.032  | 2.091  | 2.096  | 2.591  | 2.580 |
| 5.422  | 5.730  | 5.647  | 6.034  | 6.503  | 8.096 |
| 6.773  | 6.713  | 6.709  | 7.101  | 6.631  | 6.689 |
| 3.517  | 3.766  | 3.645  | 4.620  | 4.082  | 6.020 |
| 5.122  | 4.814  | 5.063  | 4.878  | 5.155  | 3.424 |
| 2.199  | 2.468  | 2.639  | 2.460  | 2.345  | 3.248 |
| 4.024  | 4.065  | 4.172  | 3.931  | 3.781  | 5.023 |
| 5.281  | 5.639  | 5.558  | 6.009  | 6.691  | 8.393 |
| 5.005  | 4.937  | 5.160  | 6.110  | 4.859  | 2.969 |
| 2.827  | 2.609  | 2.890  | 3.156  | 2.934  | 1.914 |
| 4.288  | 3.695  | 4.087  | 3.836  | 3.945  | 3.572 |
| 3.380  | 2.226  | 3.936  | 3.706  | 3.272  | 3.289 |
| 7.754  | 8.244  | 8.083  | 7.932  | 8.121  | 7.368 |
| 6.859  | 6.765  | 6.671  | 6.746  | 6.901  | 5.224 |
| 2.389  | 1.588  | 1.844  | 1.868  | 1.695  | 1.821 |
| 2.349  | 2.911  | 2.179  | 3.130  | 2.573  | 3.138 |
| 2.977  | 2.495  | 2.621  | 2.006  | 2.897  | 1.974 |

|       |       |       |       |       |       |
|-------|-------|-------|-------|-------|-------|
| 1.993 | 2.048 | 1.727 | 2.230 | 1.846 | 2.372 |
| 6.052 | 5.147 | 5.704 | 5.984 | 6.149 | 3.859 |
| 6.733 | 5.672 | 6.482 | 6.370 | 6.204 | 6.882 |
| 3.176 | 2.869 | 2.367 | 2.216 | 2.387 | 2.715 |
| 3.940 | 3.665 | 3.485 | 4.835 | 3.666 | 4.226 |
| 4.292 | 3.756 | 4.142 | 4.060 | 4.186 | 4.499 |
| 6.846 | 7.094 | 6.837 | 7.178 | 7.065 | 7.905 |
| 3.129 | 3.791 | 3.149 | 2.548 | 2.432 | 3.431 |
| 7.647 | 7.662 | 7.091 | 7.012 | 7.310 | 2.308 |
| 3.221 | 3.766 | 3.589 | 2.576 | 3.344 | 3.730 |
| 5.917 | 5.955 | 5.975 | 5.223 | 5.572 | 3.004 |
| 5.207 | 5.317 | 5.096 | 5.519 | 5.598 | 6.178 |
| 3.151 | 2.781 | 3.443 | 3.329 | 3.322 | 3.436 |
| 2.289 | 2.554 | 2.500 | 2.489 | 2.998 | 1.964 |
| 7.145 | 6.768 | 7.080 | 6.832 | 6.721 | 5.666 |
| 3.228 | 3.407 | 3.209 | 3.501 | 3.290 | 4.454 |
| 4.430 | 4.939 | 4.298 | 2.918 | 4.241 | 2.791 |
| 4.521 | 5.426 | 4.788 | 5.028 | 5.109 | 5.514 |
| 2.707 | 3.740 | 3.455 | 3.129 | 3.214 | 2.085 |
| 5.965 | 6.240 | 6.254 | 6.560 | 6.388 | 5.495 |
| 4.105 | 4.596 | 4.484 | 3.751 | 4.260 | 4.048 |
| 4.506 | 3.875 | 4.478 | 4.543 | 3.775 | 5.021 |
| 2.977 | 3.390 | 3.738 | 2.456 | 3.470 | 1.990 |
| 6.415 | 6.437 | 6.530 | 6.388 | 6.577 | 5.571 |
| 2.218 | 1.966 | 2.353 | 2.254 | 2.312 | 1.827 |
| 2.515 | 3.172 | 3.801 | 3.862 | 4.106 | 4.421 |
| 5.917 | 6.042 | 6.119 | 6.075 | 6.039 | 5.515 |
| 2.532 | 2.810 | 2.026 | 2.488 | 2.503 | 2.666 |
| 2.081 | 2.363 | 2.469 | 2.809 | 2.403 | 3.882 |
| 5.790 | 5.867 | 6.166 | 6.291 | 6.448 | 7.088 |
| 6.700 | 5.031 | 5.631 | 5.880 | 5.678 | 5.742 |
| 4.616 | 3.312 | 2.778 | 4.602 | 4.047 | 3.871 |
| 5.005 | 3.931 | 3.556 | 4.349 | 4.288 | 5.679 |
| 6.830 | 5.185 | 5.534 | 6.083 | 5.636 | 6.190 |
| 4.278 | 4.365 | 4.380 | 4.205 | 4.420 | 4.197 |
| 3.459 | 3.931 | 3.758 | 3.100 | 3.617 | 1.630 |
| 5.506 | 5.723 | 5.702 | 5.423 | 5.667 | 5.019 |
| 3.656 | 2.714 | 4.106 | 3.157 | 3.204 | 3.134 |
| 3.940 | 3.940 | 3.680 | 3.753 | 3.374 | 4.328 |
| 3.113 | 2.650 | 3.194 | 3.145 | 3.348 | 3.760 |
| 1.799 | 1.799 | 2.218 | 2.417 | 2.121 | 3.322 |
| 3.258 | 2.356 | 3.760 | 2.626 | 3.513 | 3.909 |
| 3.582 | 3.017 | 3.268 | 3.821 | 3.789 | 3.637 |
| 2.769 | 2.309 | 3.310 | 2.876 | 2.673 | 2.797 |
| 5.656 | 5.718 | 5.797 | 4.947 | 5.305 | 2.698 |
| 2.483 | 2.594 | 2.718 | 3.165 | 2.485 | 2.910 |
| 4.434 | 5.061 | 4.503 | 4.478 | 4.723 | 3.446 |
| 2.156 | 2.012 | 2.039 | 2.476 | 2.019 | 1.806 |
| 5.592 | 5.654 | 5.807 | 5.534 | 4.845 | 3.365 |
| 4.611 | 4.214 | 5.053 | 4.842 | 4.042 | 4.078 |

|       |       |       |       |       |       |
|-------|-------|-------|-------|-------|-------|
| 3.051 | 3.090 | 3.061 | 3.504 | 2.845 | 3.185 |
| 4.094 | 3.345 | 3.592 | 3.704 | 3.315 | 3.350 |
| 3.556 | 3.310 | 3.573 | 2.880 | 3.185 | 2.465 |
| 1.401 | 1.456 | 0.975 | 1.326 | 1.145 | 1.789 |
| 3.190 | 3.115 | 3.178 | 3.250 | 3.336 | 2.451 |
| 2.929 | 2.726 | 2.454 | 3.067 | 2.785 | 3.190 |
| 8.743 | 8.336 | 8.494 | 8.381 | 8.355 | 7.762 |
| 1.282 | 1.767 | 1.827 | 1.882 | 1.564 | 1.412 |
| 3.860 | 4.393 | 3.635 | 4.230 | 3.951 | 2.935 |
| 3.026 | 2.855 | 2.790 | 2.328 | 2.680 | 1.551 |
| 3.779 | 3.700 | 3.619 | 3.339 | 3.465 | 2.256 |
| 3.445 | 4.375 | 4.004 | 3.598 | 3.625 | 3.289 |
| 3.892 | 4.664 | 4.432 | 4.622 | 4.908 | 4.788 |
| 4.526 | 4.324 | 4.445 | 4.345 | 4.810 | 3.975 |
| 3.198 | 3.310 | 3.322 | 3.025 | 3.089 | 3.801 |
| 4.007 | 4.294 | 3.924 | 4.043 | 4.040 | 5.197 |
| 1.520 | 1.578 | 1.433 | 1.555 | 1.080 | 2.127 |
| 6.339 | 6.497 | 6.279 | 6.440 | 6.601 | 6.117 |
| 4.138 | 4.013 | 4.866 | 4.266 | 4.166 | 3.949 |
| 3.534 | 2.944 | 3.212 | 3.011 | 3.612 | 4.431 |
| 5.174 | 5.004 | 5.304 | 5.508 | 5.201 | 2.219 |
| 4.778 | 4.492 | 4.729 | 4.560 | 4.949 | 3.136 |
| 3.771 | 4.033 | 2.895 | 2.699 | 3.752 | 2.237 |
| 8.324 | 6.481 | 7.258 | 5.002 | 8.333 | 6.828 |
| 2.320 | 2.057 | 1.971 | 2.202 | 2.179 | 2.064 |
| 2.623 | 2.883 | 2.094 | 2.469 | 2.765 | 3.056 |
| 1.918 | 2.320 | 2.165 | 1.470 | 1.409 | 1.704 |
| 2.733 | 2.416 | 2.368 | 2.867 | 2.658 | 2.994 |
| 3.364 | 4.201 | 3.790 | 3.756 | 3.747 | 3.276 |
| 4.632 | 5.282 | 4.963 | 4.717 | 4.662 | 3.714 |
| 3.508 | 2.869 | 3.976 | 3.983 | 2.532 | 4.011 |
| 2.970 | 3.085 | 3.615 | 3.149 | 3.485 | 2.471 |
| 1.494 | 1.385 | 2.218 | 1.802 | 2.069 | 2.915 |
| 4.019 | 4.220 | 4.777 | 3.986 | 4.613 | 4.964 |
| 4.078 | 4.999 | 4.800 | 3.765 | 4.460 | 3.347 |
| 6.187 | 6.173 | 6.287 | 6.319 | 6.384 | 5.754 |
| 3.841 | 4.907 | 4.437 | 4.232 | 4.672 | 3.793 |
| 3.093 | 3.269 | 3.393 | 3.648 | 4.236 | 5.251 |
| 3.586 | 3.939 | 3.872 | 3.484 | 3.303 | 2.804 |
| 3.926 | 3.872 | 4.307 | 4.186 | 4.062 | 3.279 |
| 6.621 | 6.130 | 6.097 | 6.424 | 6.291 | 6.700 |
| 2.420 | 2.559 | 2.810 | 2.655 | 2.675 | 1.703 |
| 4.483 | 4.693 | 4.743 | 5.247 | 4.570 | 4.282 |
| 7.141 | 7.507 | 7.573 | 7.743 | 7.438 | 7.781 |
| 3.178 | 3.585 | 3.228 | 2.774 | 3.548 | 3.808 |
| 2.620 | 2.442 | 2.870 | 2.748 | 2.244 | 2.188 |
| 5.126 | 4.611 | 4.355 | 4.375 | 5.358 | 3.782 |
| 6.343 | 6.416 | 6.238 | 6.073 | 6.118 | 5.827 |
| 4.952 | 3.882 | 4.091 | 4.469 | 4.214 | 2.397 |
| 3.621 | 3.579 | 3.584 | 3.584 | 3.833 | 2.606 |

|       |       |       |       |       |       |
|-------|-------|-------|-------|-------|-------|
| 3.594 | 4.195 | 3.906 | 4.244 | 4.403 | 5.512 |
| 5.142 | 6.073 | 5.634 | 4.646 | 5.217 | 5.478 |
| 4.929 | 4.889 | 4.630 | 4.337 | 4.525 | 5.248 |
| 6.194 | 5.374 | 6.103 | 4.856 | 5.210 | 4.144 |
| 6.895 | 6.516 | 6.711 | 6.952 | 6.804 | 7.372 |
| 4.028 | 2.944 | 2.770 | 3.914 | 3.774 | 2.059 |
| 3.518 | 2.713 | 1.928 | 3.734 | 4.001 | 2.586 |
| 3.639 | 4.217 | 5.140 | 3.802 | 3.849 | 4.738 |
| 8.486 | 8.371 | 8.797 | 8.324 | 8.572 | 7.280 |
| 2.658 | 1.898 | 2.875 | 1.469 | 1.589 | 0.971 |
| 4.772 | 5.008 | 5.492 | 6.040 | 6.233 | 7.749 |
| 2.362 | 3.286 | 2.831 | 3.001 | 2.821 | 3.541 |
| 4.384 | 4.205 | 4.596 | 4.803 | 3.321 | 2.308 |
| 3.120 | 3.646 | 3.583 | 3.542 | 3.825 | 2.608 |
| 3.303 | 3.973 | 3.891 | 2.926 | 3.627 | 3.721 |
| 2.746 | 3.365 | 3.551 | 2.377 | 3.162 | 2.948 |
| 1.780 | 2.221 | 2.500 | 1.742 | 1.904 | 2.890 |
| 2.271 | 2.830 | 2.822 | 2.346 | 2.605 | 3.228 |
| 5.596 | 6.413 | 5.760 | 6.485 | 5.531 | 5.415 |
| 4.671 | 4.031 | 4.581 | 3.415 | 4.261 | 5.444 |
| 2.859 | 4.476 | 3.800 | 4.583 | 4.689 | 4.861 |
| 3.193 | 3.423 | 3.358 | 2.813 | 2.803 | 3.546 |
| 3.874 | 3.059 | 3.520 | 3.027 | 3.271 | 4.204 |
| 3.848 | 4.434 | 4.669 | 3.312 | 3.992 | 7.253 |
| 2.907 | 1.198 | 2.274 | 2.352 | 3.009 | 3.886 |
| 1.316 | 1.458 | 1.304 | 1.161 | 0.770 | 1.125 |
| 2.247 | 2.116 | 2.693 | 2.664 | 3.158 | 2.247 |
| 5.476 | 5.502 | 5.744 | 5.283 | 5.197 | 6.159 |
| 3.692 | 3.879 | 3.196 | 3.514 | 3.369 | 4.399 |
| 5.450 | 5.472 | 5.530 | 5.211 | 5.272 | 5.712 |
| 7.594 | 7.826 | 8.117 | 6.746 | 7.473 | 8.528 |
| 1.358 | 2.726 | 1.219 | 1.327 | 1.436 | 1.839 |
| 4.682 | 5.386 | 4.929 | 4.651 | 4.265 | 6.334 |
| 2.957 | 2.873 | 3.110 | 2.866 | 2.749 | 3.627 |
| 3.327 | 3.730 | 3.824 | 3.736 | 3.670 | 3.936 |
| 6.108 | 6.296 | 6.311 | 6.123 | 6.091 | 5.602 |
| 2.890 | 2.606 | 3.037 | 1.563 | 2.745 | 3.886 |
| 3.617 | 4.144 | 4.506 | 2.715 | 3.718 | 4.638 |
| 3.096 | 3.713 | 3.272 | 3.451 | 3.789 | 4.343 |
| 5.625 | 5.475 | 4.904 | 4.406 | 5.349 | 4.452 |
| 4.500 | 4.198 | 4.305 | 4.036 | 4.657 | 5.500 |
| 8.076 | 6.849 | 7.861 | 7.673 | 7.708 | 9.673 |
| 3.705 | 2.759 | 3.512 | 3.297 | 3.490 | 3.716 |
| 4.745 | 5.447 | 5.170 | 5.092 | 5.434 | 4.709 |
| 3.507 | 3.637 | 3.615 | 3.353 | 4.222 | 4.596 |
| 6.242 | 6.665 | 6.444 | 6.512 | 6.552 | 5.223 |
| 3.990 | 3.715 | 3.759 | 4.032 | 4.424 | 5.350 |
| 3.263 | 3.159 | 3.709 | 3.746 | 3.650 | 4.426 |
| 5.670 | 5.300 | 5.469 | 5.263 | 6.083 | 6.291 |
| 3.765 | 3.844 | 3.764 | 3.946 | 3.652 | 3.216 |



|       |       |       |       |       |       |
|-------|-------|-------|-------|-------|-------|
| 5.658 | 6.667 | 6.570 | 5.693 | 6.513 | 4.709 |
| 2.686 | 2.721 | 3.313 | 3.833 | 3.479 | 3.101 |
| 3.172 | 2.805 | 3.810 | 2.614 | 2.944 | 2.915 |
| 3.389 | 3.073 | 2.849 | 3.500 | 3.590 | 3.476 |
| 7.827 | 7.911 | 8.060 | 7.969 | 7.784 | 6.484 |
| 4.712 | 4.145 | 4.449 | 4.311 | 4.447 | 1.949 |
| 8.042 | 8.417 | 8.287 | 7.700 | 8.167 | 5.752 |
| 6.420 | 6.522 | 6.297 | 6.325 | 6.227 | 4.183 |
| 3.223 | 4.249 | 4.003 | 4.703 | 4.333 | 5.227 |
| 6.529 | 5.928 | 5.999 | 6.466 | 6.208 | 7.504 |
| 6.034 | 6.159 | 6.109 | 5.756 | 5.876 | 4.167 |
| 3.024 | 2.914 | 2.524 | 2.990 | 3.089 | 2.921 |
| 3.413 | 4.921 | 3.791 | 3.717 | 3.543 | 1.952 |
| 4.998 | 4.283 | 4.958 | 4.744 | 4.953 | 3.480 |
| 7.406 | 6.501 | 6.058 | 6.508 | 7.093 | 6.287 |
| 4.954 | 5.303 | 5.256 | 5.330 | 5.317 | 3.779 |
| 7.851 | 7.818 | 8.043 | 7.639 | 7.767 | 6.289 |
| 6.737 | 6.010 | 6.748 | 6.308 | 6.296 | 2.145 |
| 5.147 | 5.317 | 5.334 | 4.903 | 4.804 | 4.312 |
| 9.234 | 9.417 | 9.330 | 9.332 | 9.217 | 7.340 |
| 4.160 | 4.552 | 4.461 | 4.931 | 4.968 | 6.621 |
| 4.964 | 4.770 | 4.693 | 4.123 | 4.593 | 4.009 |
| 5.575 | 5.550 | 5.811 | 5.523 | 5.309 | 4.473 |
| 3.724 | 3.136 | 4.071 | 3.261 | 3.197 | 3.787 |
| 7.114 | 7.044 | 6.979 | 7.069 | 7.114 | 6.057 |
| 7.191 | 6.981 | 6.994 | 7.085 | 7.045 | 4.764 |
| 5.496 | 5.646 | 6.098 | 5.476 | 6.024 | 4.509 |
| 4.518 | 4.513 | 4.785 | 4.861 | 5.150 | 5.212 |
| 5.013 | 5.207 | 5.538 | 4.999 | 5.313 | 4.707 |
| 5.015 | 4.143 | 4.269 | 5.098 | 4.480 | 3.270 |
| 5.925 | 6.479 | 6.255 | 6.227 | 6.243 | 5.169 |
| 8.017 | 8.358 | 8.546 | 8.219 | 8.274 | 6.956 |
| 4.441 | 3.730 | 3.829 | 3.602 | 3.747 | 4.134 |
| 3.491 | 4.241 | 4.340 | 3.848 | 4.101 | 5.381 |
| 5.623 | 5.725 | 5.977 | 5.679 | 5.634 | 5.131 |
| 2.109 | 2.444 | 2.348 | 2.093 | 2.144 | 2.411 |
| 2.995 | 2.442 | 2.496 | 2.786 | 2.688 | 2.490 |
| 5.888 | 6.331 | 6.273 | 5.681 | 6.006 | 4.473 |
| 2.231 | 2.763 | 3.579 | 3.355 | 3.135 | 2.009 |
| 2.826 | 3.534 | 2.274 | 3.351 | 3.361 | 4.195 |
| 7.364 | 7.505 | 7.448 | 7.504 | 7.494 | 6.394 |
| 4.819 | 4.315 | 4.189 | 4.685 | 3.894 | 3.447 |
| 5.167 | 6.045 | 5.600 | 5.412 | 5.691 | 4.417 |
| 4.386 | 4.308 | 4.236 | 4.664 | 4.851 | 5.579 |
| 3.177 | 3.886 | 2.935 | 3.664 | 3.677 | 3.940 |
| 6.516 | 7.277 | 6.859 | 6.868 | 7.119 | 5.345 |
| 6.854 | 6.845 | 6.813 | 6.554 | 6.675 | 4.939 |
| 5.926 | 6.101 | 6.004 | 4.983 | 5.160 | 3.346 |
| 3.828 | 4.169 | 3.957 | 2.912 | 3.767 | 4.614 |
| 5.050 | 4.418 | 4.362 | 4.020 | 4.396 | 3.973 |

|       |       |       |       |       |       |
|-------|-------|-------|-------|-------|-------|
| 6.745 | 5.847 | 5.981 | 5.668 | 6.120 | 5.601 |
| 3.563 | 3.463 | 3.821 | 3.135 | 3.606 | 4.669 |
| 3.401 | 3.209 | 3.463 | 3.851 | 3.807 | 5.114 |
| 4.596 | 4.302 | 4.220 | 4.279 | 4.166 | 3.157 |
| 3.607 | 3.142 | 3.790 | 3.487 | 3.453 | 4.979 |
| 8.534 | 8.244 | 8.473 | 8.539 | 8.541 | 7.424 |
| 5.749 | 5.551 | 6.083 | 5.439 | 5.445 | 3.851 |
| 8.022 | 8.227 | 8.309 | 8.088 | 8.210 | 5.850 |
| 6.923 | 6.560 | 6.877 | 6.498 | 6.624 | 4.833 |
| 4.121 | 4.649 | 4.541 | 4.269 | 4.337 | 2.907 |
| 6.815 | 5.405 | 5.512 | 5.419 | 5.826 | 3.494 |
| 6.795 | 6.860 | 7.009 | 7.162 | 7.008 | 5.508 |
| 4.636 | 4.719 | 4.747 | 4.750 | 4.650 | 5.361 |
| 4.866 | 5.095 | 5.224 | 4.942 | 5.344 | 4.567 |
| 4.702 | 5.074 | 4.674 | 4.789 | 4.619 | 3.709 |
| 4.460 | 4.061 | 3.929 | 4.307 | 4.043 | 4.051 |
| 3.676 | 3.732 | 4.770 | 4.339 | 4.189 | 3.928 |
| 5.593 | 5.967 | 5.882 | 5.422 | 5.800 | 5.061 |
| 6.198 | 5.991 | 6.280 | 6.162 | 6.184 | 4.643 |
| 5.784 | 5.707 | 6.009 | 5.778 | 5.569 | 4.842 |
| 6.290 | 5.942 | 6.067 | 6.265 | 6.043 | 7.057 |
| 3.699 | 3.707 | 3.445 | 3.387 | 3.468 | 3.103 |
| 4.009 | 4.165 | 4.375 | 4.405 | 4.290 | 3.860 |
| 5.094 | 5.289 | 5.101 | 5.298 | 5.311 | 6.241 |
| 6.692 | 7.112 | 6.792 | 7.111 | 6.918 | 6.973 |
| 5.155 | 5.651 | 6.019 | 5.892 | 6.708 | 6.880 |
| 2.836 | 3.226 | 2.509 | 3.332 | 2.841 | 1.853 |
| 3.551 | 3.526 | 3.265 | 3.455 | 3.590 | 5.026 |
| 8.051 | 8.093 | 8.122 | 8.187 | 8.036 | 6.911 |
| 3.930 | 1.714 | 3.262 | 2.947 | 2.765 | 2.791 |
| 3.808 | 3.502 | 3.100 | 3.417 | 3.133 | 3.122 |
| 5.716 | 5.358 | 5.406 | 5.634 | 5.683 | 5.166 |
| 3.082 | 3.435 | 3.483 | 2.991 | 2.780 | 3.072 |
| 3.876 | 3.441 | 3.813 | 3.774 | 3.405 | 3.197 |
| 5.705 | 4.604 | 5.082 | 4.582 | 4.261 | 3.501 |
| 2.628 | 3.345 | 3.464 | 3.380 | 2.452 | 3.102 |
| 3.466 | 3.392 | 3.275 | 3.291 | 3.359 | 2.963 |
| 5.050 | 5.493 | 5.493 | 5.687 | 5.708 | 5.966 |
| 4.417 | 4.444 | 3.717 | 4.304 | 4.259 | 4.940 |
| 2.315 | 2.205 | 2.027 | 1.701 | 2.239 | 2.761 |
| 4.194 | 2.761 | 3.672 | 2.373 | 2.956 | 2.321 |
| 1.537 | 1.856 | 1.993 | 2.127 | 1.975 | 2.255 |
| 4.784 | 4.981 | 5.380 | 5.116 | 5.263 | 3.774 |
| 4.823 | 5.365 | 4.648 | 4.267 | 4.874 | 5.008 |
| 4.622 | 4.517 | 5.054 | 4.376 | 4.968 | 3.932 |
| 3.429 | 3.179 | 4.134 | 4.390 | 4.095 | 4.153 |
| 3.291 | 3.665 | 3.833 | 4.136 | 4.316 | 5.198 |
| 4.443 | 3.894 | 4.317 | 4.637 | 4.589 | 3.084 |
| 4.710 | 4.652 | 4.574 | 4.670 | 4.418 | 3.155 |
| 1.609 | 1.812 | 1.414 | 1.412 | 1.394 | 2.348 |

|       |       |       |       |       |       |
|-------|-------|-------|-------|-------|-------|
| 4.083 | 5.083 | 4.509 | 4.372 | 4.715 | 4.200 |
| 2.823 | 3.376 | 2.988 | 2.962 | 3.159 | 2.897 |
| 5.672 | 5.486 | 5.580 | 5.909 | 5.772 | 6.552 |
| 7.587 | 7.799 | 7.732 | 7.691 | 7.622 | 5.778 |
| 7.696 | 7.549 | 7.370 | 7.442 | 7.488 | 5.064 |
| 4.604 | 4.779 | 4.713 | 5.305 | 5.250 | 6.462 |
| 1.934 | 1.924 | 2.168 | 2.278 | 1.855 | 3.165 |
| 2.009 | 2.438 | 2.793 | 1.845 | 1.651 | 2.629 |
| 1.907 | 2.394 | 2.275 | 1.825 | 2.437 | 1.722 |
| 6.666 | 7.201 | 6.677 | 7.255 | 6.892 | 5.504 |
| 5.327 | 5.864 | 5.619 | 5.909 | 5.693 | 4.334 |
| 7.487 | 9.754 | 8.887 | 6.614 | 6.891 | 6.563 |
| 2.363 | 3.253 | 3.196 | 2.624 | 2.008 | 4.305 |
| 6.343 | 6.488 | 6.492 | 6.271 | 6.521 | 5.961 |
| 2.448 | 2.407 | 2.921 | 1.960 | 2.613 | 1.550 |
| 5.832 | 5.732 | 5.979 | 6.106 | 6.037 | 6.670 |
| 7.882 | 7.652 | 7.855 | 7.863 | 7.872 | 6.562 |
| 4.210 | 4.188 | 4.966 | 4.735 | 4.472 | 4.547 |
| 6.784 | 7.086 | 7.015 | 6.918 | 6.895 | 6.257 |
| 5.994 | 5.736 | 6.114 | 6.430 | 6.234 | 4.723 |
| 7.004 | 7.009 | 6.995 | 7.127 | 6.731 | 4.232 |
| 1.792 | 1.467 | 1.540 | 1.799 | 1.691 | 2.545 |
| 3.734 | 4.429 | 3.857 | 3.830 | 3.927 | 3.076 |
| 4.325 | 4.113 | 4.336 | 4.345 | 4.367 | 4.786 |
| 4.207 | 4.164 | 4.041 | 4.065 | 3.863 | 2.991 |
| 7.192 | 6.706 | 6.587 | 6.882 | 6.485 | 3.549 |
| 4.484 | 4.198 | 4.659 | 4.013 | 4.496 | 1.786 |
| 3.362 | 3.853 | 4.477 | 4.266 | 4.271 | 3.950 |
| 5.408 | 4.878 | 5.346 | 5.363 | 4.726 | 2.412 |
| 3.894 | 4.700 | 4.508 | 3.766 | 4.464 | 3.288 |
| 2.309 | 1.616 | 2.805 | 1.995 | 1.855 | 1.853 |
| 2.599 | 2.732 | 2.539 | 2.477 | 3.139 | 1.959 |
| 2.922 | 3.731 | 3.829 | 3.382 | 4.045 | 3.273 |
| 2.977 | 3.449 | 3.030 | 2.891 | 3.300 | 3.077 |
| 2.559 | 2.881 | 3.651 | 3.522 | 3.195 | 2.750 |
| 5.357 | 5.298 | 5.126 | 5.544 | 5.438 | 4.051 |
| 6.266 | 5.847 | 5.948 | 5.852 | 5.648 | 3.693 |
| 3.863 | 3.860 | 4.117 | 3.925 | 3.740 | 3.058 |
| 3.021 | 3.195 | 2.924 | 3.087 | 2.264 | 3.993 |
| 7.289 | 7.330 | 7.208 | 7.071 | 7.120 | 6.312 |
| 5.850 | 4.966 | 5.068 | 5.419 | 5.481 | 6.534 |
| 4.572 | 5.881 | 5.556 | 4.505 | 5.568 | 5.936 |
| 2.926 | 3.380 | 2.868 | 2.977 | 2.635 | 4.260 |
| 4.436 | 4.338 | 4.639 | 4.891 | 4.468 | 2.308 |
| 5.193 | 5.552 | 5.344 | 5.444 | 5.740 | 6.789 |
| 4.624 | 5.245 | 4.891 | 4.623 | 4.786 | 4.083 |
| 4.362 | 4.618 | 4.222 | 4.105 | 4.362 | 4.566 |
| 3.592 | 3.169 | 3.535 | 3.271 | 3.356 | 2.418 |
| 3.086 | 3.423 | 4.012 | 3.201 | 3.413 | 3.787 |
| 4.763 | 4.723 | 4.983 | 4.309 | 4.669 | 3.713 |

|       |       |       |       |       |       |
|-------|-------|-------|-------|-------|-------|
| 3.424 | 3.953 | 4.141 | 3.538 | 3.296 | 5.292 |
| 3.354 | 3.274 | 3.790 | 3.651 | 3.885 | 4.290 |
| 3.519 | 4.528 | 3.628 | 4.255 | 4.578 | 2.673 |
| 7.867 | 8.389 | 7.995 | 8.415 | 8.698 | 8.932 |
| 7.012 | 7.103 | 7.018 | 7.077 | 7.328 | 6.471 |
| 4.937 | 4.832 | 4.681 | 4.639 | 4.738 | 3.837 |
| 2.771 | 2.539 | 2.347 | 1.679 | 3.166 | 2.503 |
| 6.862 | 6.227 | 6.396 | 6.661 | 6.310 | 4.838 |
| 3.412 | 4.075 | 3.723 | 3.431 | 3.183 | 2.502 |
| 6.216 | 6.019 | 6.105 | 6.180 | 6.170 | 4.212 |
| 5.262 | 5.564 | 5.260 | 5.298 | 5.491 | 4.063 |
| 2.459 | 3.478 | 2.799 | 2.716 | 2.312 | 2.075 |
| 7.403 | 7.101 | 7.100 | 7.481 | 7.237 | 5.738 |
| 4.296 | 3.784 | 4.463 | 4.912 | 4.933 | 5.657 |
| 1.968 | 2.398 | 3.724 | 3.934 | 4.175 | 4.963 |
| 3.507 | 3.318 | 2.840 | 3.337 | 3.337 | 3.082 |
| 4.103 | 4.537 | 4.454 | 4.885 | 4.678 | 5.816 |
| 7.731 | 7.917 | 7.971 | 7.755 | 8.102 | 7.321 |
| 7.823 | 6.810 | 7.405 | 6.902 | 7.204 | 6.148 |
| 3.672 | 4.150 | 4.085 | 4.234 | 4.414 | 5.784 |
| 2.670 | 2.436 | 2.577 | 3.055 | 2.417 | 2.855 |
| 4.008 | 2.874 | 2.881 | 3.555 | 3.422 | 2.408 |
| 2.736 | 2.444 | 2.892 | 2.299 | 2.578 | 2.388 |
| 3.084 | 2.894 | 3.092 | 2.921 | 3.075 | 2.737 |
| 3.137 | 3.127 | 2.693 | 2.695 | 1.794 | 3.258 |
| 7.066 | 7.600 | 7.208 | 7.439 | 7.778 | 9.000 |
| 3.319 | 3.313 | 2.378 | 3.482 | 2.392 | 3.637 |
| 2.908 | 2.704 | 2.444 | 2.487 | 3.164 | 2.259 |
| 3.925 | 3.955 | 4.217 | 3.454 | 3.514 | 3.280 |
| 3.227 | 2.603 | 2.730 | 3.125 | 3.185 | 3.452 |
| 7.141 | 7.607 | 7.369 | 7.311 | 7.691 | 6.044 |
| 2.874 | 1.940 | 2.815 | 2.220 | 2.083 | 2.247 |
| 1.553 | 2.122 | 2.380 | 1.236 | 2.184 | 2.519 |
| 4.464 | 4.200 | 3.924 | 3.407 | 3.734 | 5.555 |
| 1.854 | 1.673 | 1.700 | 1.376 | 1.730 | 3.609 |
| 3.629 | 4.515 | 4.008 | 4.433 | 3.824 | 3.414 |
| 6.120 | 5.978 | 5.680 | 5.331 | 5.890 | 6.023 |
| 6.246 | 5.970 | 5.692 | 5.379 | 5.856 | 6.016 |
| 6.143 | 5.932 | 5.635 | 5.354 | 5.883 | 6.037 |
| 4.973 | 4.816 | 4.876 | 4.576 | 4.883 | 5.618 |
| 4.961 | 4.816 | 4.803 | 4.603 | 4.838 | 5.611 |
| 5.095 | 5.278 | 4.860 | 4.876 | 5.149 | 3.250 |
| 2.594 | 1.756 | 1.810 | 1.552 | 1.889 | 1.594 |
| 8.078 | 8.458 | 8.027 | 7.974 | 8.075 | 8.981 |
| 2.514 | 2.635 | 1.727 | 1.352 | 3.083 | 2.561 |
| 4.554 | 5.229 | 4.808 | 5.444 | 5.406 | 6.242 |
| 4.474 | 4.637 | 4.311 | 4.516 | 4.903 | 5.742 |
| 4.667 | 5.208 | 4.970 | 5.023 | 4.812 | 5.683 |
| 3.351 | 3.553 | 4.098 | 3.581 | 3.816 | 4.327 |
| 4.074 | 3.980 | 3.768 | 4.210 | 4.624 | 4.666 |

|       |       |       |       |       |        |
|-------|-------|-------|-------|-------|--------|
| 7.523 | 7.443 | 7.484 | 7.452 | 7.602 | 6.890  |
| 9.726 | 9.577 | 9.650 | 9.789 | 9.790 | 8.428  |
| 7.926 | 7.999 | 7.825 | 7.942 | 7.846 | 6.003  |
| 6.975 | 6.392 | 7.025 | 6.700 | 6.967 | 5.264  |
| 7.193 | 6.851 | 6.814 | 6.832 | 6.772 | 5.925  |
| 3.164 | 3.016 | 3.520 | 3.229 | 3.789 | 4.295  |
| 3.617 | 3.871 | 2.688 | 2.767 | 3.935 | 1.920  |
| 5.252 | 4.987 | 5.402 | 5.215 | 5.212 | 3.354  |
| 7.841 | 8.134 | 7.942 | 7.849 | 7.619 | 5.399  |
| 7.433 | 7.542 | 7.523 | 7.271 | 7.470 | 4.880  |
| 2.850 | 3.193 | 2.630 | 3.292 | 3.001 | 2.550  |
| 6.623 | 7.255 | 6.911 | 6.629 | 6.821 | 6.156  |
| 4.282 | 4.065 | 4.285 | 3.476 | 3.717 | 4.700  |
| 3.944 | 4.115 | 4.635 | 3.743 | 4.578 | 5.059  |
| 4.289 | 4.165 | 4.878 | 4.938 | 5.606 | 7.738  |
| 3.340 | 2.827 | 3.610 | 2.668 | 3.323 | 3.595  |
| 4.347 | 3.862 | 4.129 | 4.565 | 4.161 | 4.829  |
| 8.168 | 8.925 | 7.968 | 9.138 | 9.530 | 10.352 |
| 6.344 | 7.105 | 6.718 | 6.475 | 6.466 | 6.224  |
| 3.174 | 2.888 | 1.662 | 2.352 | 2.672 | 4.746  |
| 3.777 | 3.281 | 3.679 | 3.430 | 2.218 | 2.008  |
| 5.491 | 5.124 | 5.642 | 5.475 | 5.747 | 3.981  |
| 3.692 | 4.146 | 4.194 | 3.664 | 3.644 | 4.306  |
| 9.132 | 8.847 | 9.042 | 9.032 | 8.897 | 6.632  |
| 3.823 | 4.177 | 4.013 | 4.060 | 4.476 | 5.196  |
| 5.232 | 5.082 | 4.448 | 4.834 | 5.412 | 3.838  |
| 5.573 | 4.715 | 4.096 | 4.300 | 4.134 | 5.180  |
| 7.645 | 8.001 | 7.863 | 7.288 | 7.465 | 7.809  |
| 6.041 | 5.739 | 5.631 | 6.078 | 6.044 | 4.044  |
| 2.587 | 4.430 | 3.763 | 3.599 | 4.424 | 5.224  |
| 8.013 | 9.009 | 8.450 | 8.977 | 9.460 | 10.358 |
| 8.060 | 7.642 | 7.985 | 7.535 | 7.283 | 7.337  |
| 7.923 | 7.374 | 7.882 | 7.473 | 7.264 | 7.203  |
| 6.141 | 5.919 | 6.337 | 5.941 | 5.988 | 4.952  |
| 6.651 | 7.194 | 6.755 | 6.610 | 6.734 | 5.121  |
| 7.492 | 6.298 | 6.841 | 7.254 | 7.178 | 7.022  |
| 6.308 | 6.546 | 6.579 | 6.632 | 7.220 | 8.584  |
| 7.374 | 6.770 | 6.915 | 6.802 | 6.441 | 4.628  |
| 6.243 | 6.049 | 6.101 | 6.079 | 6.174 | 3.672  |
| 5.151 | 5.061 | 4.987 | 4.823 | 4.851 | 3.261  |
| 3.828 | 3.212 | 3.918 | 3.026 | 3.347 | 1.780  |
| 7.931 | 8.218 | 8.133 | 7.778 | 7.921 | 6.773  |
| 8.483 | 8.850 | 8.589 | 8.637 | 8.492 | 7.653  |
| 4.965 | 4.996 | 4.979 | 5.142 | 4.763 | 4.231  |
| 6.082 | 6.664 | 6.532 | 6.642 | 6.977 | 8.310  |
| 7.966 | 7.597 | 7.862 | 7.995 | 7.980 | 5.915  |
| 4.518 | 5.002 | 4.957 | 4.987 | 4.400 | 3.232  |
| 4.412 | 5.166 | 4.807 | 5.071 | 4.903 | 3.945  |
| 3.825 | 3.570 | 4.158 | 3.296 | 3.690 | 2.531  |
| 7.618 | 7.588 | 7.603 | 7.446 | 7.537 | 6.784  |

|       |       |       |       |       |       |
|-------|-------|-------|-------|-------|-------|
| 6.646 | 6.548 | 6.679 | 6.637 | 6.492 | 6.073 |
| 2.722 | 3.140 | 2.372 | 2.225 | 2.398 | 2.453 |
| 4.533 | 5.001 | 4.788 | 5.069 | 4.762 | 3.301 |
| 2.718 | 2.787 | 2.573 | 2.061 | 2.719 | 3.918 |
| 1.692 | 1.883 | 1.890 | 1.542 | 2.209 | 2.237 |
| 4.084 | 3.666 | 3.057 | 4.239 | 4.204 | 5.386 |
| 4.607 | 4.252 | 3.527 | 3.600 | 3.714 | 4.586 |
| 3.184 | 4.123 | 3.401 | 3.515 | 3.423 | 1.823 |
| 2.996 | 3.035 | 3.280 | 2.834 | 2.992 | 2.994 |
| 4.908 | 3.395 | 3.775 | 3.526 | 4.188 | 3.536 |
| 3.593 | 3.302 | 4.050 | 3.633 | 3.759 | 2.031 |
| 3.052 | 3.684 | 2.908 | 2.786 | 3.732 | 4.624 |
| 6.036 | 5.434 | 5.219 | 4.972 | 5.028 | 3.614 |
| 2.532 | 2.498 | 2.479 | 2.356 | 2.492 | 2.328 |
| 2.596 | 2.970 | 2.975 | 3.036 | 2.774 | 2.927 |
| 3.384 | 2.463 | 2.482 | 2.023 | 2.348 | 1.405 |
| 4.736 | 4.641 | 4.122 | 3.373 | 4.115 | 3.835 |
| 4.334 | 4.447 | 3.917 | 3.916 | 4.077 | 3.409 |
| 1.799 | 2.267 | 2.481 | 1.570 | 2.102 | 3.025 |
| 7.710 | 8.011 | 8.103 | 7.840 | 8.076 | 7.585 |
| 3.946 | 4.395 | 4.062 | 4.172 | 4.658 | 6.601 |
| 6.457 | 6.194 | 5.831 | 5.996 | 6.059 | 3.425 |
| 4.061 | 4.285 | 3.862 | 3.638 | 3.688 | 3.919 |
| 3.216 | 2.273 | 2.894 | 2.582 | 2.883 | 2.617 |
| 1.745 | 1.347 | 1.297 | 1.487 | 1.426 | 1.935 |
| 1.863 | 2.922 | 2.129 | 2.388 | 2.047 | 3.359 |
| 2.829 | 2.406 | 2.647 | 2.500 | 2.920 | 3.212 |
| 3.697 | 3.793 | 3.559 | 3.291 | 3.849 | 4.373 |
| 3.359 | 3.760 | 3.656 | 3.503 | 4.063 | 4.259 |
| 5.622 | 6.114 | 6.345 | 4.912 | 5.652 | 5.072 |
| 6.284 | 6.108 | 6.048 | 5.426 | 5.593 | 5.575 |
| 4.485 | 3.629 | 4.186 | 3.572 | 3.743 | 3.852 |
| 4.406 | 5.172 | 5.325 | 4.671 | 4.521 | 4.569 |
| 3.470 | 2.886 | 3.218 | 3.116 | 2.827 | 3.903 |
| 5.450 | 5.764 | 5.370 | 5.500 | 5.558 | 5.361 |
| 6.256 | 6.848 | 6.750 | 6.618 | 6.692 | 6.022 |
| 3.639 | 4.228 | 3.802 | 3.242 | 3.902 | 4.820 |
| 5.797 | 6.158 | 5.877 | 5.725 | 6.118 | 5.309 |
| 3.943 | 4.550 | 4.131 | 4.367 | 4.289 | 3.223 |
| 5.562 | 5.995 | 5.971 | 5.543 | 5.657 | 5.134 |
| 2.952 | 4.121 | 3.938 | 3.779 | 3.926 | 2.677 |
| 5.505 | 5.774 | 5.351 | 5.524 | 5.752 | 4.593 |
| 6.137 | 6.714 | 6.262 | 6.111 | 6.476 | 7.295 |
| 5.714 | 5.758 | 5.705 | 5.901 | 6.086 | 5.598 |
| 6.182 | 6.581 | 6.204 | 6.063 | 6.083 | 5.305 |
| 5.324 | 5.557 | 5.381 | 5.357 | 5.498 | 5.145 |
| 2.067 | 1.948 | 2.568 | 2.105 | 1.820 | 2.040 |
| 6.804 | 6.458 | 7.149 | 7.278 | 6.830 | 5.174 |
| 5.213 | 5.309 | 6.705 | 5.556 | 5.222 | 6.649 |
| 1.502 | 1.079 | 1.045 | 1.109 | 1.764 | 3.496 |

|       |       |       |       |       |       |
|-------|-------|-------|-------|-------|-------|
| 4.132 | 2.956 | 3.056 | 3.490 | 3.591 | 7.148 |
| 4.061 | 4.242 | 4.469 | 4.855 | 4.893 | 5.856 |
| 6.224 | 6.746 | 6.847 | 6.784 | 6.748 | 7.390 |
| 6.788 | 7.309 | 6.899 | 7.141 | 7.251 | 5.072 |
| 4.399 | 3.711 | 3.824 | 4.259 | 4.312 | 4.944 |
| 5.890 | 6.442 | 6.280 | 6.282 | 5.996 | 5.450 |
| 4.467 | 4.118 | 4.554 | 5.090 | 4.638 | 3.956 |
| 4.264 | 4.453 | 4.066 | 4.489 | 4.970 | 4.571 |
| 2.595 | 1.967 | 2.454 | 2.337 | 2.721 | 2.618 |
| 4.598 | 4.535 | 4.331 | 4.642 | 4.644 | 5.258 |
| 6.374 | 6.443 | 6.437 | 6.339 | 6.960 | 8.104 |
| 6.629 | 6.649 | 7.131 | 6.558 | 7.105 | 3.407 |
| 6.349 | 6.022 | 6.299 | 6.144 | 6.035 | 4.130 |
| 3.643 | 4.260 | 4.623 | 4.471 | 4.698 | 3.197 |
| 5.878 | 5.528 | 6.227 | 5.372 | 5.534 | 4.268 |
| 4.381 | 5.079 | 5.178 | 5.088 | 4.963 | 3.952 |
| 2.539 | 2.385 | 2.432 | 3.113 | 2.091 | 1.791 |
| 4.790 | 5.059 | 5.349 | 5.490 | 5.739 | 6.724 |
| 2.565 | 2.587 | 2.115 | 2.364 | 3.422 | 3.029 |
| 5.824 | 6.156 | 6.060 | 6.256 | 6.312 | 7.348 |
| 3.262 | 2.772 | 3.240 | 3.280 | 3.279 | 4.219 |
| 3.777 | 4.013 | 4.312 | 4.201 | 4.097 | 5.722 |
| 6.639 | 6.710 | 6.584 | 6.626 | 7.041 | 6.254 |
| 3.805 | 4.501 | 4.897 | 4.293 | 4.760 | 5.164 |
| 2.692 | 2.066 | 2.474 | 1.551 | 2.404 | 1.738 |
| 2.405 | 2.198 | 1.942 | 2.405 | 2.765 | 1.902 |
| 2.483 | 2.848 | 2.169 | 1.953 | 3.135 | 5.391 |
| 3.134 | 2.471 | 1.868 | 2.873 | 2.068 | 2.239 |
| 5.502 | 3.901 | 4.259 | 4.216 | 4.723 | 4.512 |
| 3.714 | 2.999 | 3.196 | 2.898 | 3.529 | 1.851 |
| 3.140 | 3.144 | 3.319 | 3.556 | 3.325 | 4.629 |
| 4.647 | 4.315 | 4.691 | 5.023 | 5.079 | 4.925 |
| 3.822 | 3.799 | 3.872 | 3.989 | 3.667 | 4.614 |
| 3.766 | 3.896 | 4.251 | 3.207 | 3.928 | 2.755 |
| 2.512 | 2.077 | 2.482 | 2.331 | 2.798 | 2.892 |
| 3.050 | 3.381 | 3.018 | 3.393 | 4.135 | 4.541 |
| 5.432 | 5.713 | 5.428 | 5.097 | 5.321 | 4.812 |
| 7.970 | 7.826 | 7.843 | 7.406 | 7.802 | 3.124 |
| 5.769 | 5.084 | 5.628 | 5.152 | 5.223 | 5.016 |
| 1.765 | 2.440 | 1.902 | 2.909 | 2.892 | 4.914 |
| 5.055 | 7.033 | 6.436 | 6.030 | 6.677 | 5.346 |
| 5.701 | 4.524 | 5.128 | 5.168 | 5.180 | 4.704 |
| 4.258 | 4.692 | 3.828 | 4.236 | 4.546 | 3.249 |
| 4.501 | 3.997 | 4.107 | 4.110 | 4.095 | 4.887 |
| 4.264 | 4.454 | 4.853 | 4.338 | 5.463 | 6.203 |
| 5.700 | 5.476 | 4.817 | 5.057 | 5.611 | 5.235 |
| 5.643 | 4.167 | 4.902 | 5.231 | 4.507 | 3.155 |
| 5.527 | 5.884 | 5.843 | 5.575 | 5.737 | 4.366 |
| 2.016 | 1.705 | 1.645 | 1.887 | 1.838 | 5.212 |
| 2.347 | 3.373 | 2.798 | 2.516 | 3.095 | 2.213 |

|       |       |       |       |       |       |
|-------|-------|-------|-------|-------|-------|
| 4.903 | 5.191 | 5.394 | 5.142 | 4.889 | 4.510 |
| 4.988 | 5.034 | 5.314 | 5.067 | 5.418 | 4.321 |
| 7.007 | 6.867 | 6.598 | 6.911 | 6.796 | 7.104 |
| 6.777 | 6.204 | 6.485 | 6.264 | 6.316 | 4.911 |
| 4.686 | 4.896 | 4.977 | 4.755 | 4.938 | 5.880 |
| 5.996 | 5.892 | 5.600 | 5.416 | 5.910 | 5.305 |
| 7.080 | 6.312 | 6.735 | 6.799 | 6.910 | 8.593 |
| 2.475 | 2.928 | 2.795 | 2.685 | 3.665 | 2.236 |
| 5.369 | 4.933 | 5.146 | 5.437 | 5.634 | 6.952 |
| 3.681 | 3.274 | 3.202 | 2.951 | 3.346 | 4.034 |
| 5.490 | 6.261 | 5.929 | 5.963 | 5.861 | 7.201 |
| 6.741 | 7.280 | 7.177 | 6.705 | 7.059 | 2.120 |
| 5.017 | 5.055 | 4.607 | 5.094 | 5.166 | 5.955 |
| 2.233 | 2.632 | 2.233 | 1.918 | 2.374 | 2.006 |
| 3.097 | 2.573 | 2.970 | 2.469 | 2.913 | 4.109 |
| 6.918 | 7.228 | 7.058 | 6.123 | 6.368 | 8.311 |
| 3.440 | 3.300 | 3.733 | 3.299 | 3.222 | 5.041 |
| 3.774 | 3.417 | 3.323 | 3.240 | 2.876 | 4.835 |
| 3.318 | 3.908 | 2.840 | 3.240 | 3.286 | 2.827 |
| 2.568 | 2.526 | 2.311 | 2.135 | 1.800 | 3.192 |
| 7.024 | 6.568 | 6.818 | 7.070 | 6.541 | 5.025 |
| 7.116 | 6.518 | 6.977 | 7.043 | 6.771 | 5.428 |
| 3.788 | 4.879 | 3.725 | 3.514 | 4.698 | 5.125 |
| 4.624 | 4.502 | 4.820 | 4.778 | 4.388 | 4.100 |
| 3.584 | 2.543 | 3.651 | 3.800 | 3.609 | 3.611 |
| 3.886 | 3.571 | 3.869 | 4.175 | 3.730 | 3.230 |
| 6.411 | 5.924 | 6.371 | 6.158 | 6.452 | 5.103 |
| 5.258 | 4.572 | 4.400 | 4.330 | 5.241 | 4.302 |
| 5.681 | 6.191 | 5.699 | 5.876 | 5.939 | 5.423 |
| 7.902 | 7.776 | 8.135 | 7.898 | 7.974 | 5.678 |
| 5.206 | 5.472 | 5.496 | 5.581 | 5.342 | 4.384 |
| 2.999 | 2.684 | 2.541 | 2.927 | 1.544 | 2.982 |
| 3.740 | 3.579 | 3.233 | 4.177 | 3.475 | 3.704 |
| 5.678 | 5.681 | 5.578 | 5.809 | 5.862 | 5.409 |
| 2.469 | 2.249 | 3.186 | 2.400 | 1.639 | 1.930 |
| 3.323 | 3.106 | 3.290 | 3.506 | 3.808 | 4.810 |
| 3.146 | 2.338 | 2.043 | 2.884 | 1.951 | 2.302 |
| 2.817 | 2.701 | 2.770 | 3.095 | 3.783 | 2.420 |
| 3.346 | 3.001 | 3.266 | 3.714 | 3.242 | 4.034 |
| 1.877 | 1.841 | 1.591 | 1.898 | 1.851 | 3.767 |
| 1.996 | 1.552 | 1.399 | 1.981 | 1.748 | 2.415 |
| 6.986 | 6.547 | 6.428 | 7.187 | 6.792 | 7.742 |
| 2.035 | 2.039 | 1.994 | 1.749 | 1.871 | 2.205 |
| 4.266 | 3.397 | 4.162 | 2.754 | 3.080 | 1.276 |
| 5.654 | 5.826 | 5.777 | 4.903 | 5.392 | 5.982 |
| 4.019 | 2.335 | 3.191 | 3.927 | 2.627 | 1.443 |
| 2.644 | 2.936 | 2.673 | 3.026 | 2.579 | 3.202 |
| 2.680 | 2.532 | 2.703 | 2.376 | 2.198 | 2.331 |
| 4.267 | 3.702 | 3.638 | 3.260 | 3.883 | 2.396 |
| 2.612 | 2.072 | 2.729 | 2.646 | 3.277 | 2.126 |



|       |       |       |       |       |       |
|-------|-------|-------|-------|-------|-------|
| 2.750 | 2.437 | 3.051 | 2.421 | 3.358 | 4.256 |
| 3.624 | 3.916 | 2.996 | 3.105 | 3.093 | 3.510 |
| 3.141 | 3.024 | 3.302 | 3.805 | 2.869 | 1.666 |
| 3.262 | 2.917 | 3.458 | 2.977 | 2.631 | 2.760 |
| 2.553 | 2.493 | 1.768 | 2.817 | 2.273 | 4.379 |
| 3.693 | 4.539 | 4.082 | 4.183 | 3.703 | 2.506 |
| 2.758 | 2.513 | 2.716 | 2.835 | 2.128 | 1.941 |
| 3.756 | 3.164 | 2.399 | 3.982 | 3.457 | 4.552 |
| 4.018 | 2.522 | 3.279 | 1.637 | 2.932 | 0.910 |
| 3.363 | 2.491 | 2.428 | 2.617 | 2.837 | 1.542 |
| 2.077 | 2.662 | 1.963 | 2.602 | 3.150 | 1.780 |
| 4.966 | 5.231 | 4.743 | 4.588 | 4.675 | 3.827 |
| 2.612 | 2.547 | 3.040 | 3.049 | 3.150 | 4.136 |
| 3.888 | 3.919 | 4.867 | 3.588 | 3.794 | 2.612 |
| 2.773 | 1.765 | 2.328 | 3.046 | 2.709 | 4.548 |
| 3.178 | 2.901 | 2.074 | 1.918 | 2.513 | 1.476 |
| 4.006 | 2.970 | 3.319 | 4.026 | 3.558 | 2.814 |
| 2.846 | 3.098 | 2.856 | 2.695 | 2.408 | 3.221 |
| 3.399 | 3.353 | 3.131 | 3.847 | 3.021 | 4.566 |
| 2.889 | 1.887 | 2.708 | 3.171 | 2.527 | 2.275 |
| 0.818 | 1.922 | 1.530 | 1.889 | 1.873 | 2.875 |
| 3.568 | 4.764 | 3.504 | 3.951 | 3.877 | 2.475 |
| 5.010 | 4.357 | 4.530 | 4.115 | 4.549 | 3.462 |
| 2.532 | 2.231 | 3.214 | 2.903 | 2.482 | 3.017 |
| 2.370 | 2.280 | 3.271 | 2.388 | 2.684 | 3.012 |
| 2.102 | 1.315 | 2.682 | 1.923 | 2.270 | 2.075 |
| 3.945 | 3.550 | 4.302 | 3.444 | 3.927 | 4.369 |
| 4.956 | 4.140 | 4.347 | 5.195 | 4.487 | 3.122 |
| 3.054 | 1.563 | 2.290 | 3.425 | 2.202 | 1.575 |
| 5.402 | 5.848 | 5.828 | 5.720 | 5.534 | 3.777 |
| 3.331 | 3.237 | 2.933 | 2.457 | 2.440 | 1.903 |
| 5.188 | 5.739 | 5.786 | 5.372 | 5.969 | 5.022 |
| 2.492 | 2.918 | 2.428 | 2.451 | 2.711 | 3.284 |
| 4.091 | 3.962 | 4.267 | 3.632 | 3.753 | 2.663 |
| 3.666 | 3.496 | 3.806 | 3.422 | 3.307 | 2.701 |
| 3.470 | 3.027 | 3.573 | 3.043 | 3.664 | 2.103 |
| 2.483 | 2.370 | 2.399 | 2.608 | 1.885 | 3.411 |
| 3.756 | 4.166 | 3.507 | 4.270 | 4.260 | 5.182 |
| 3.426 | 3.753 | 3.617 | 3.832 | 3.162 | 3.052 |
| 2.814 | 3.494 | 2.184 | 2.286 | 2.849 | 2.296 |
| 1.757 | 2.431 | 2.359 | 2.994 | 2.124 | 1.842 |
| 3.496 | 3.145 | 3.644 | 3.550 | 3.429 | 4.756 |
| 2.350 | 2.952 | 2.605 | 2.293 | 2.895 | 2.454 |
| 4.277 | 3.886 | 4.756 | 4.267 | 4.922 | 5.302 |
| 3.443 | 2.536 | 3.073 | 3.073 | 2.848 | 2.629 |
| 2.906 | 2.539 | 2.217 | 3.591 | 3.032 | 2.596 |
| 3.225 | 3.388 | 2.751 | 3.106 | 2.903 | 3.907 |
| 4.254 | 3.696 | 4.069 | 4.379 | 4.382 | 4.596 |
| 6.048 | 5.298 | 4.282 | 5.267 | 5.197 | 5.207 |
| 4.660 | 5.149 | 4.746 | 4.910 | 4.824 | 4.197 |

|       |       |       |       |       |       |
|-------|-------|-------|-------|-------|-------|
| 7.098 | 7.095 | 7.026 | 6.996 | 7.075 | 6.340 |
| 5.746 | 6.063 | 6.036 | 5.563 | 5.949 | 6.595 |
| 4.206 | 4.294 | 4.059 | 4.417 | 4.009 | 2.742 |
| 4.309 | 4.904 | 4.801 | 5.126 | 5.817 | 7.929 |
| 5.057 | 4.788 | 4.644 | 4.814 | 4.626 | 3.737 |
| 3.438 | 3.510 | 3.809 | 2.918 | 3.721 | 3.853 |
| 5.015 | 5.090 | 4.967 | 5.234 | 5.239 | 5.768 |
| 4.926 | 5.477 | 5.074 | 4.067 | 4.274 | 4.545 |
| 4.382 | 3.934 | 3.611 | 4.487 | 3.974 | 3.578 |
| 3.936 | 3.871 | 3.694 | 3.912 | 3.886 | 3.684 |
| 3.751 | 3.316 | 3.446 | 3.740 | 3.782 | 3.971 |
| 5.535 | 6.095 | 5.836 | 5.758 | 5.801 | 6.004 |
| 4.946 | 5.658 | 5.542 | 4.497 | 4.982 | 6.069 |
| 2.056 | 2.406 | 2.199 | 1.915 | 2.183 | 3.017 |
| 1.834 | 1.585 | 2.355 | 2.095 | 1.935 | 2.330 |
| 5.402 | 5.529 | 5.814 | 5.225 | 5.188 | 6.055 |
| 7.052 | 5.980 | 7.266 | 6.450 | 6.804 | 4.395 |
| 3.556 | 4.252 | 4.245 | 3.617 | 4.026 | 1.997 |
| 5.580 | 5.549 | 5.520 | 4.786 | 5.066 | 1.567 |
| 2.954 | 2.997 | 2.808 | 2.767 | 3.725 | 3.875 |
| 4.361 | 4.754 | 4.285 | 5.112 | 5.079 | 6.003 |
| 7.401 | 7.950 | 7.788 | 7.770 | 7.610 | 7.067 |
| 5.116 | 4.780 | 4.693 | 4.388 | 4.397 | 2.181 |
| 6.396 | 6.750 | 6.577 | 6.652 | 6.630 | 5.728 |
| 5.432 | 5.687 | 5.376 | 5.423 | 5.680 | 5.006 |
| 7.633 | 7.513 | 7.406 | 7.195 | 7.364 | 6.095 |
| 2.521 | 4.080 | 4.144 | 2.923 | 3.261 | 5.836 |
| 1.522 | 1.624 | 1.771 | 2.369 | 1.771 | 1.945 |
| 1.658 | 2.752 | 2.294 | 2.202 | 1.613 | 1.973 |
| 2.788 | 3.709 | 3.293 | 2.973 | 3.378 | 3.311 |
| 9.344 | 9.314 | 9.101 | 8.794 | 9.730 | 6.341 |
| 5.646 | 5.567 | 5.852 | 4.758 | 5.245 | 6.215 |
| 2.333 | 3.611 | 3.140 | 2.564 | 2.199 | 2.901 |
| 4.460 | 3.995 | 4.234 | 3.539 | 3.590 | 3.554 |
| 1.713 | 1.616 | 1.457 | 1.083 | 1.189 | 2.159 |
| 3.546 | 2.521 | 2.234 | 2.290 | 2.974 | 2.269 |
| 6.226 | 5.080 | 5.244 | 5.627 | 5.223 | 6.043 |
| 1.600 | 3.342 | 1.641 | 1.817 | 2.452 | 2.648 |
| 2.920 | 3.118 | 2.795 | 2.928 | 2.485 | 3.235 |
| 2.199 | 0.794 | 1.612 | 2.094 | 1.664 | 2.422 |
| 1.827 | 1.418 | 1.389 | 1.579 | 1.866 | 1.992 |
| 4.926 | 4.862 | 5.142 | 5.242 | 5.027 | 4.332 |
| 4.906 | 5.184 | 5.039 | 4.341 | 5.155 | 4.253 |
| 2.066 | 1.958 | 2.028 | 2.334 | 2.084 | 2.685 |
| 3.178 | 3.158 | 3.011 | 2.196 | 2.092 | 2.685 |
| 6.886 | 7.064 | 7.243 | 6.536 | 6.787 | 7.279 |
| 3.589 | 3.831 | 3.669 | 3.390 | 3.913 | 3.792 |
| 6.589 | 6.272 | 6.426 | 6.365 | 6.362 | 7.195 |
| 4.024 | 4.533 | 4.077 | 3.137 | 3.378 | 4.094 |
| 6.174 | 7.177 | 7.260 | 5.744 | 6.044 | 7.186 |

|       |       |       |       |       |       |
|-------|-------|-------|-------|-------|-------|
| 7.692 | 6.511 | 7.159 | 7.506 | 7.490 | 8.288 |
| 8.368 | 8.067 | 8.156 | 8.148 | 8.304 | 6.990 |
| 6.110 | 5.963 | 5.696 | 5.359 | 6.081 | 5.066 |
| 5.999 | 4.934 | 5.443 | 5.461 | 5.539 | 4.014 |
| 4.659 | 4.223 | 4.501 | 4.736 | 4.279 | 5.236 |
| 3.068 | 3.219 | 3.893 | 3.656 | 3.508 | 3.643 |
| 2.841 | 2.236 | 3.548 | 3.071 | 3.131 | 2.208 |
| 5.327 | 5.550 | 5.637 | 5.519 | 5.978 | 7.714 |
| 2.981 | 4.501 | 3.798 | 4.617 | 4.554 | 3.162 |
| 2.530 | 2.576 | 3.934 | 2.876 | 2.430 | 3.188 |
| 3.596 | 3.759 | 4.203 | 3.474 | 3.432 | 2.731 |
| 3.469 | 3.555 | 2.993 | 4.072 | 3.711 | 4.920 |
| 3.369 | 3.635 | 3.812 | 2.491 | 3.472 | 3.337 |
| 6.797 | 6.361 | 6.588 | 6.323 | 6.716 | 4.891 |
| 4.578 | 5.333 | 4.635 | 4.439 | 4.558 | 4.921 |
| 3.747 | 1.608 | 4.407 | 3.961 | 2.363 | 1.120 |
| 0.946 | 0.287 | 0.548 | 1.296 | 1.323 | 5.132 |
| 6.341 | 5.873 | 6.131 | 6.089 | 6.022 | 4.216 |
| 4.899 | 4.560 | 5.127 | 5.567 | 5.775 | 6.615 |
| 5.904 | 4.599 | 3.995 | 3.846 | 4.623 | 3.703 |
| 2.865 | 2.828 | 3.573 | 3.156 | 2.988 | 1.983 |
| 5.306 | 5.050 | 5.096 | 5.055 | 5.275 | 6.220 |
| 3.405 | 3.785 | 3.376 | 3.505 | 3.458 | 2.838 |
| 3.482 | 3.565 | 4.012 | 3.016 | 3.442 | 4.417 |
| 1.773 | 1.753 | 1.713 | 1.843 | 1.599 | 1.892 |
| 4.542 | 4.134 | 4.723 | 3.482 | 3.836 | 4.733 |
| 4.091 | 4.210 | 3.595 | 4.289 | 3.804 | 3.286 |
| 3.389 | 3.303 | 2.807 | 3.869 | 3.429 | 3.573 |
| 5.789 | 5.768 | 5.882 | 6.331 | 6.743 | 8.614 |
| 5.479 | 4.425 | 5.151 | 5.117 | 5.329 | 3.935 |
| 4.151 | 3.548 | 3.732 | 3.601 | 4.040 | 3.924 |
| 4.443 | 4.726 | 5.115 | 5.319 | 5.481 | 4.194 |
| 2.377 | 2.802 | 2.446 | 2.797 | 2.332 | 1.495 |
| 3.702 | 3.370 | 3.460 | 3.084 | 4.191 | 3.776 |
| 6.873 | 6.511 | 6.561 | 6.693 | 6.900 | 5.200 |
| 6.918 | 7.157 | 7.103 | 6.557 | 6.816 | 6.113 |
| 2.697 | 2.842 | 3.052 | 2.025 | 2.396 | 7.720 |
| 8.204 | 7.620 | 7.728 | 7.714 | 7.610 | 6.880 |
| 2.984 | 2.929 | 2.739 | 3.285 | 3.818 | 3.924 |
| 1.258 | 1.915 | 2.049 | 1.844 | 1.602 | 2.042 |
| 2.627 | 2.266 | 2.833 | 2.558 | 2.502 | 2.078 |
| 3.546 | 3.363 | 3.212 | 2.927 | 3.202 | 4.134 |
| 2.704 | 2.257 | 3.333 | 2.817 | 2.522 | 2.144 |
| 4.764 | 4.847 | 4.792 | 4.698 | 4.422 | 5.668 |
| 5.563 | 5.465 | 5.668 | 5.233 | 5.687 | 4.574 |
| 6.510 | 6.436 | 6.732 | 6.130 | 6.871 | 5.725 |
| 3.267 | 2.998 | 3.562 | 3.410 | 3.767 | 5.100 |
| 1.821 | 2.802 | 3.232 | 2.805 | 2.572 | 1.883 |
| 2.724 | 2.515 | 2.267 | 2.824 | 2.101 | 3.126 |
| 6.838 | 6.439 | 6.819 | 6.577 | 6.538 | 4.914 |

|       |       |       |       |       |       |
|-------|-------|-------|-------|-------|-------|
| 6.582 | 6.597 | 6.357 | 6.504 | 6.519 | 5.565 |
| 2.535 | 2.578 | 2.525 | 2.611 | 2.256 | 2.272 |
| 3.173 | 3.909 | 3.129 | 3.113 | 3.657 | 2.168 |
| 4.501 | 4.210 | 4.458 | 4.211 | 4.414 | 5.185 |
| 5.328 | 5.833 | 6.007 | 5.724 | 5.757 | 4.866 |
| 3.158 | 2.621 | 2.624 | 2.727 | 2.918 | 1.879 |
| 5.896 | 6.000 | 6.349 | 6.025 | 5.829 | 5.126 |
| 3.684 | 3.762 | 3.527 | 3.799 | 2.923 | 3.950 |
| 4.691 | 4.441 | 4.233 | 4.421 | 4.824 | 3.693 |
| 5.070 | 4.812 | 4.960 | 5.203 | 5.077 | 4.235 |
| 2.990 | 3.240 | 3.644 | 3.922 | 3.612 | 2.126 |
| 4.578 | 4.277 | 4.400 | 4.458 | 4.203 | 4.000 |
| 4.416 | 4.373 | 4.555 | 4.402 | 4.539 | 5.668 |
| 4.429 | 4.410 | 4.569 | 4.419 | 4.579 | 5.620 |
| 3.401 | 4.394 | 3.459 | 3.627 | 3.926 | 4.428 |
| 5.756 | 5.775 | 6.089 | 6.146 | 5.679 | 7.418 |
| 7.133 | 6.805 | 7.300 | 6.670 | 6.940 | 1.801 |
| 3.212 | 3.252 | 3.297 | 3.322 | 3.486 | 4.867 |
| 5.986 | 5.938 | 6.013 | 5.920 | 6.115 | 7.579 |
| 5.898 | 5.869 | 5.872 | 5.836 | 6.007 | 7.473 |
| 5.791 | 5.915 | 5.917 | 5.754 | 5.983 | 7.399 |
| 3.857 | 3.667 | 4.086 | 4.133 | 3.947 | 5.361 |

|       |       |       |       |       |       |
|-------|-------|-------|-------|-------|-------|
| 5.780 | 5.015 | 5.164 | 5.386 | 5.499 | 6.371 |
| 7.904 | 8.242 | 8.036 | 7.943 | 7.979 | 7.389 |
| 5.480 | 5.167 | 5.938 | 5.464 | 5.479 | 4.646 |
| 2.546 | 2.296 | 2.780 | 2.499 | 2.775 | 1.773 |
| 1.914 | 3.044 | 3.420 | 2.996 | 3.252 | 3.019 |
| 2.408 | 3.010 | 3.557 | 3.118 | 3.152 | 2.475 |
| 2.592 | 3.256 | 2.178 | 2.606 | 2.498 | 2.913 |
| 3.614 | 4.072 | 2.978 | 3.492 | 3.058 | 4.069 |
| 3.040 | 3.603 | 3.349 | 3.178 | 3.449 | 2.524 |
| 5.598 | 5.960 | 5.681 | 5.852 | 5.399 | 4.296 |
| 4.210 | 4.794 | 4.115 | 4.330 | 4.792 | 5.154 |
| 6.004 | 1.611 | 5.427 | 5.602 | 5.552 | 1.049 |
| 4.334 | 4.594 | 4.468 | 4.411 | 4.922 | 5.063 |
| 3.050 | 3.778 | 3.393 | 3.775 | 4.025 | 4.467 |
| 2.429 | 2.787 | 2.992 | 2.778 | 3.142 | 3.512 |
| 5.230 | 5.499 | 5.918 | 5.256 | 5.378 | 4.018 |
| 3.242 | 2.450 | 2.684 | 2.189 | 2.838 | 4.046 |
| 2.364 | 2.167 | 2.416 | 2.056 | 2.340 | 2.129 |
| 2.385 | 2.155 | 2.406 | 2.106 | 2.297 | 1.853 |
| 4.769 | 4.408 | 4.867 | 4.838 | 4.565 | 4.294 |
| 2.735 | 2.859 | 2.897 | 2.591 | 1.955 | 2.419 |
| 3.496 | 4.016 | 4.323 | 4.167 | 4.129 | 4.732 |
| 2.677 | 3.047 | 3.166 | 2.232 | 2.532 | 2.554 |
| 5.020 | 5.238 | 4.915 | 5.164 | 4.946 | 4.681 |
| 7.616 | 7.664 | 7.643 | 7.800 | 7.782 | 8.663 |
| 7.446 | 7.452 | 7.388 | 7.219 | 7.236 | 6.667 |
| 5.776 | 5.744 | 5.565 | 5.731 | 5.528 | 4.898 |

|       |       |       |       |       |        |
|-------|-------|-------|-------|-------|--------|
| 5.772 | 6.110 | 6.214 | 5.956 | 6.061 | 5.316  |
| 2.438 | 2.257 | 2.868 | 2.275 | 2.281 | 2.459  |
| 4.609 | 4.809 | 5.045 | 5.305 | 5.177 | 5.969  |
| 3.388 | 2.904 | 1.923 | 3.523 | 3.978 | 1.378  |
| 3.619 | 4.085 | 3.456 | 4.066 | 3.644 | 3.518  |
| 4.836 | 5.199 | 5.211 | 4.873 | 5.421 | 6.106  |
| 4.287 | 4.678 | 4.801 | 4.720 | 4.953 | 6.042  |
| 3.332 | 3.878 | 3.557 | 3.525 | 3.533 | 2.797  |
| 3.518 | 2.475 | 3.672 | 3.081 | 3.802 | 1.866  |
| 1.559 | 1.229 | 1.319 | 1.538 | 1.568 | 1.341  |
| 4.811 | 4.166 | 4.982 | 4.772 | 5.179 | 4.310  |
| 5.399 | 3.961 | 4.443 | 5.355 | 4.915 | 2.207  |
| 5.481 | 4.886 | 4.851 | 4.582 | 4.725 | 3.761  |
| 7.425 | 7.289 | 7.279 | 7.071 | 6.898 | 5.336  |
| 6.642 | 6.852 | 7.052 | 6.829 | 6.961 | 5.730  |
| 6.716 | 6.759 | 6.592 | 6.789 | 6.672 | 5.812  |
| 5.547 | 5.599 | 5.815 | 5.969 | 5.940 | 4.529  |
| 6.885 | 6.384 | 6.864 | 6.882 | 6.758 | 5.061  |
| 2.331 | 1.958 | 2.662 | 2.594 | 2.035 | 2.661  |
| 6.882 | 6.489 | 6.793 | 6.580 | 6.847 | 4.643  |
| 8.750 | 9.121 | 9.092 | 8.938 | 9.033 | 10.200 |
| 6.025 | 5.994 | 5.866 | 6.194 | 6.270 | 6.576  |
| 2.096 | 2.148 | 1.380 | 1.911 | 2.205 | 2.427  |
| 5.357 | 5.560 | 5.502 | 5.516 | 5.877 | 4.119  |
| 5.713 | 5.341 | 5.519 | 5.025 | 4.985 | 6.135  |
| 2.235 | 3.313 | 2.082 | 2.924 | 2.550 | 2.467  |
| 5.849 | 5.726 | 6.034 | 5.673 | 5.429 | 4.645  |
| 5.273 | 5.611 | 5.104 | 5.260 | 5.206 | 4.514  |
| 6.116 | 5.638 | 5.821 | 5.741 | 5.596 | 5.153  |
| 5.209 | 5.476 | 5.573 | 5.688 | 5.694 | 5.013  |
| 2.428 | 3.081 | 3.670 | 2.190 | 3.204 | 1.746  |
| 5.057 | 5.073 | 4.945 | 5.293 | 5.048 | 6.374  |
| 1.136 | 1.747 | 2.243 | 2.179 | 2.276 | 3.684  |
| 7.655 | 7.977 | 7.641 | 7.972 | 8.227 | 8.864  |
| 6.980 | 7.204 | 7.149 | 7.233 | 7.393 | 5.061  |
| 8.014 | 8.220 | 8.358 | 8.398 | 8.448 | 5.679  |
| 3.157 | 3.887 | 3.261 | 3.118 | 2.869 | 3.624  |
| 5.738 | 5.211 | 5.471 | 5.125 | 5.132 | 4.427  |
| 4.331 | 3.727 | 4.367 | 4.581 | 3.969 | 4.338  |
| 3.232 | 3.691 | 2.632 | 3.417 | 2.897 | 3.976  |
| 1.258 | 1.611 | 1.125 | 1.039 | 1.223 | 5.334  |
| 1.940 | 2.544 | 2.156 | 2.646 | 2.125 | 3.191  |
| 5.818 | 6.055 | 5.851 | 6.015 | 6.130 | 6.713  |
| 3.397 | 3.872 | 3.412 | 4.255 | 4.096 | 5.716  |
| 3.889 | 4.231 | 4.064 | 4.515 | 4.094 | 3.602  |
| 6.940 | 7.345 | 7.124 | 7.216 | 7.314 | 6.837  |
| 6.608 | 6.899 | 6.930 | 7.056 | 7.047 | 6.115  |
| 2.022 | 2.021 | 2.472 | 2.088 | 1.989 | 2.518  |
| 1.570 | 2.138 | 1.828 | 2.127 | 2.218 | 3.073  |
| 4.116 | 3.243 | 3.126 | 4.605 | 3.548 | 2.557  |

|       |       |       |       |       |       |
|-------|-------|-------|-------|-------|-------|
| 3.081 | 3.797 | 3.814 | 3.551 | 4.088 | 2.237 |
| 7.410 | 7.093 | 7.171 | 7.310 | 7.078 | 6.755 |
| 6.630 | 6.729 | 6.468 | 6.635 | 6.545 | 4.786 |
| 7.724 | 7.325 | 7.697 | 7.546 | 7.392 | 5.347 |
| 5.980 | 6.135 | 5.892 | 5.915 | 6.153 | 6.409 |
| 6.630 | 6.487 | 6.315 | 6.564 | 6.614 | 4.020 |
| 4.418 | 3.384 | 4.308 | 3.929 | 3.846 | 4.862 |
| 3.373 | 2.744 | 2.613 | 2.387 | 2.446 | 2.668 |
| 1.784 | 3.326 | 3.382 | 2.923 | 3.505 | 1.023 |
| 2.327 | 1.787 | 2.176 | 2.382 | 1.801 | 2.878 |
| 5.556 | 5.289 | 4.925 | 5.441 | 5.460 | 2.136 |
| 5.441 | 4.962 | 5.369 | 5.286 | 5.352 | 2.951 |
| 7.461 | 7.228 | 7.423 | 7.031 | 7.338 | 6.004 |
| 4.843 | 4.443 | 3.708 | 4.550 | 5.041 | 5.004 |
| 3.937 | 4.332 | 4.211 | 3.723 | 3.956 | 3.713 |
| 3.672 | 4.030 | 3.863 | 3.508 | 4.323 | 1.544 |
| 2.410 | 2.162 | 2.716 | 2.495 | 3.001 | 1.596 |
| 3.242 | 3.811 | 3.798 | 3.463 | 4.170 | 2.117 |
| 3.205 | 3.190 | 3.010 | 2.509 | 2.563 | 1.843 |
| 2.577 | 2.745 | 2.837 | 2.840 | 3.131 | 1.558 |
| 1.693 | 1.162 | 1.104 | 1.327 | 2.077 | 3.317 |
| 6.780 | 6.538 | 6.792 | 6.885 | 6.655 | 6.186 |
| 2.695 | 3.034 | 2.988 | 3.212 | 2.840 | 2.480 |
| 2.449 | 1.974 | 2.053 | 2.289 | 2.503 | 3.431 |
| 3.990 | 4.453 | 4.122 | 4.261 | 4.195 | 3.650 |
| 3.224 | 3.656 | 3.427 | 3.875 | 3.812 | 2.792 |
| 8.466 | 8.032 | 8.665 | 8.176 | 8.457 | 6.656 |
| 8.171 | 8.128 | 8.387 | 8.413 | 8.342 | 7.166 |
| 3.494 | 3.151 | 3.580 | 3.986 | 3.662 | 3.295 |
| 4.323 | 3.699 | 4.180 | 4.015 | 3.395 | 2.647 |
| 2.460 | 2.401 | 2.678 | 2.396 | 2.476 | 2.957 |
| 5.904 | 5.809 | 5.151 | 5.254 | 5.710 | 4.573 |
| 1.675 | 1.827 | 1.612 | 1.407 | 1.306 | 1.433 |
| 1.710 | 1.903 | 2.303 | 1.991 | 2.124 | 2.831 |
| 1.670 | 1.095 | 1.232 | 1.305 | 1.261 | 3.630 |
| 2.397 | 2.411 | 2.477 | 2.335 | 2.360 | 1.597 |
| 2.574 | 2.213 | 2.446 | 2.683 | 2.498 | 2.622 |
| 4.061 | 3.666 | 4.039 | 4.219 | 3.551 | 2.503 |
| 5.074 | 4.756 | 5.248 | 5.312 | 4.773 | 4.303 |
| 3.206 | 2.529 | 2.630 | 2.833 | 2.837 | 3.514 |
| 2.974 | 2.172 | 2.586 | 2.920 | 2.647 | 2.457 |
| 9.001 | 8.355 | 8.792 | 8.539 | 8.251 | 7.984 |
| 7.839 | 8.063 | 8.036 | 7.965 | 7.983 | 7.327 |
| 5.958 | 6.013 | 6.343 | 6.013 | 5.664 | 5.316 |
| 7.680 | 6.827 | 7.642 | 6.775 | 6.850 | 6.957 |
| 5.354 | 5.693 | 5.542 | 5.849 | 5.758 | 5.195 |
| 4.947 | 4.451 | 4.641 | 4.449 | 4.649 | 5.352 |
| 6.297 | 6.550 | 6.561 | 6.374 | 6.170 | 5.809 |
| 5.571 | 5.557 | 5.392 | 5.524 | 5.393 | 5.391 |
| 5.365 | 5.752 | 5.617 | 5.136 | 5.598 | 5.129 |

|        |        |       |        |        |       |
|--------|--------|-------|--------|--------|-------|
| 4.060  | 4.548  | 4.461 | 4.695  | 4.107  | 3.505 |
| 9.623  | 9.689  | 9.673 | 9.738  | 9.712  | 9.350 |
| 4.302  | 3.728  | 4.101 | 4.200  | 4.064  | 4.054 |
| 2.987  | 2.876  | 2.752 | 3.343  | 2.813  | 3.010 |
| 2.950  | 2.631  | 2.992 | 3.595  | 3.624  | 3.430 |
| 2.821  | 2.371  | 2.795 | 2.366  | 3.006  | 3.418 |
| 2.059  | 2.037  | 2.048 | 1.817  | 1.995  | 1.884 |
| 2.625  | 2.263  | 2.030 | 1.764  | 2.156  | 2.505 |
| 7.710  | 8.034  | 7.934 | 8.046  | 8.100  | 9.365 |
| 10.112 | 10.236 | 9.988 | 10.080 | 10.213 | 7.982 |
| 6.297  | 6.918  | 6.653 | 6.710  | 6.707  | 5.666 |
| 4.821  | 4.248  | 4.471 | 4.550  | 3.992  | 3.712 |
| 3.543  | 3.967  | 3.173 | 3.366  | 3.549  | 2.899 |
| 3.023  | 2.960  | 2.466 | 3.411  | 2.044  | 3.308 |
| 4.453  | 4.880  | 4.825 | 4.618  | 5.051  | 5.924 |
| 8.301  | 8.409  | 8.352 | 8.562  | 8.649  | 8.428 |
| 2.650  | 2.916  | 2.316 | 3.129  | 3.063  | 4.095 |
| 7.904  | 7.677  | 7.775 | 7.560  | 7.743  | 4.062 |
| 6.428  | 6.385  | 6.272 | 6.076  | 6.422  | 5.599 |
| 7.092  | 7.137  | 6.978 | 7.378  | 7.506  | 8.558 |
| 6.998  | 7.251  | 7.238 | 7.781  | 7.683  | 9.318 |
| 4.838  | 5.115  | 5.292 | 5.059  | 5.202  | 5.274 |
| 4.240  | 4.228  | 4.336 | 3.864  | 3.670  | 5.263 |
| 8.224  | 8.463  | 8.258 | 8.282  | 8.317  | 7.128 |
| 5.452  | 5.605  | 5.560 | 6.372  | 6.365  | 7.898 |
| 2.667  | 4.000  | 3.722 | 2.943  | 3.275  | 5.307 |
| 2.155  | 1.857  | 2.416 | 2.018  | 1.970  | 2.661 |
| 2.329  | 2.063  | 2.187 | 1.489  | 2.063  | 1.876 |
| 2.578  | 2.452  | 2.184 | 1.954  | 2.711  | 2.126 |
| 4.880  | 4.952  | 4.934 | 4.609  | 4.871  | 3.204 |
| 5.908  | 6.120  | 6.239 | 5.785  | 5.970  | 5.443 |
| 7.830  | 7.847  | 7.973 | 7.678  | 7.641  | 5.298 |
| 5.457  | 6.355  | 5.541 | 5.563  | 5.714  | 5.151 |
| 3.177  | 2.021  | 3.435 | 3.020  | 3.879  | 3.305 |
| 4.610  | 4.913  | 4.933 | 4.991  | 4.593  | 3.679 |
| 4.098  | 3.567  | 3.567 | 4.304  | 4.332  | 5.057 |
| 3.458  | 3.756  | 3.554 | 3.706  | 3.750  | 4.577 |
| 3.525  | 2.762  | 3.975 | 3.076  | 3.161  | 2.877 |
| 7.076  | 7.014  | 7.062 | 7.051  | 6.843  | 6.374 |
| 5.664  | 4.627  | 5.593 | 5.735  | 5.150  | 3.969 |
| 2.720  | 2.466  | 2.644 | 2.647  | 2.448  | 3.942 |
| 2.676  | 3.247  | 2.846 | 3.020  | 3.540  | 1.715 |
| 8.039  | 7.936  | 7.849 | 7.742  | 7.859  | 7.178 |
| 6.298  | 6.923  | 6.716 | 6.510  | 6.719  | 6.113 |
| 2.113  | 1.987  | 1.842 | 2.163  | 1.863  | 3.082 |
| 2.939  | 2.634  | 2.686 | 2.496  | 3.043  | 2.088 |
| 2.918  | 2.270  | 1.943 | 2.662  | 3.366  | 2.801 |
| 5.384  | 4.373  | 4.928 | 5.289  | 4.793  | 2.053 |
| 3.114  | 3.302  | 2.812 | 2.442  | 3.341  | 2.432 |
| 3.458  | 3.584  | 4.559 | 3.953  | 3.561  | 1.835 |

|       |       |       |       |       |       |
|-------|-------|-------|-------|-------|-------|
| 6.311 | 6.194 | 6.382 | 6.256 | 6.150 | 7.316 |
| 3.618 | 2.827 | 2.238 | 3.217 | 2.512 | 5.041 |
| 6.243 | 6.398 | 6.282 | 5.843 | 5.991 | 7.867 |
| 4.575 | 4.588 | 4.830 | 4.591 | 4.750 | 6.341 |
| 4.976 | 4.952 | 5.266 | 4.624 | 4.382 | 1.958 |
| 2.948 | 2.803 | 2.436 | 3.153 | 2.637 | 2.223 |
| 6.813 | 6.450 | 6.725 | 6.663 | 6.443 | 4.227 |
| 4.306 | 4.843 | 4.920 | 3.899 | 4.175 | 4.915 |
| 6.044 | 5.478 | 5.586 | 6.068 | 5.818 | 5.464 |
| 6.078 | 6.304 | 6.554 | 6.432 | 6.326 | 6.803 |
| 3.849 | 4.738 | 4.597 | 4.290 | 4.499 | 3.162 |
| 6.308 | 3.482 | 4.094 | 4.445 | 5.017 | 2.828 |
| 6.713 | 7.095 | 6.697 | 6.691 | 6.911 | 6.326 |
| 0.603 | 0.947 | 1.097 | 1.443 | 1.338 | 1.356 |
| 8.647 | 9.126 | 9.268 | 8.714 | 8.637 | 9.321 |
| 5.107 | 5.234 | 5.289 | 5.202 | 5.326 | 4.871 |
| 2.491 | 3.167 | 2.821 | 2.816 | 3.151 | 3.679 |
| 3.191 | 3.727 | 4.124 | 3.546 | 2.739 | 4.931 |
| 4.958 | 5.199 | 5.738 | 4.872 | 5.014 | 4.935 |
| 5.616 | 5.455 | 5.942 | 5.973 | 6.137 | 7.015 |
| 2.049 | 2.201 | 2.201 | 2.042 | 2.161 | 3.709 |
| 7.667 | 7.862 | 6.763 | 7.298 | 7.427 | 7.024 |
| 4.675 | 4.883 | 5.016 | 5.274 | 5.439 | 5.118 |
| 5.516 | 5.403 | 5.851 | 4.978 | 5.423 | 4.887 |
| 3.441 | 3.314 | 3.181 | 3.068 | 3.175 | 4.569 |
| 5.444 | 5.096 | 5.195 | 5.325 | 5.316 | 6.098 |
| 5.929 | 5.151 | 6.187 | 5.823 | 5.889 | 3.773 |
| 3.952 | 4.909 | 4.434 | 4.178 | 4.102 | 3.693 |
| 6.971 | 6.972 | 7.331 | 6.912 | 6.973 | 6.415 |
| 6.484 | 6.525 | 6.649 | 6.319 | 6.860 | 5.486 |
| 3.830 | 3.259 | 2.780 | 2.965 | 3.313 | 3.013 |
| 4.627 | 4.719 | 4.973 | 4.885 | 4.891 | 4.971 |
| 5.720 | 5.594 | 5.846 | 5.609 | 5.613 | 3.422 |
| 5.418 | 4.751 | 5.455 | 5.206 | 5.661 | 4.660 |
| 5.862 | 3.722 | 5.117 | 4.528 | 4.254 | 4.267 |
| 8.161 | 8.116 | 7.838 | 8.050 | 8.136 | 7.672 |
| 5.864 | 6.067 | 5.974 | 6.204 | 5.912 | 5.221 |
| 4.761 | 3.920 | 4.281 | 3.996 | 4.373 | 4.670 |
| 2.035 | 2.064 | 1.856 | 2.474 | 2.080 | 2.983 |
| 4.703 | 4.759 | 4.742 | 4.558 | 4.510 | 5.273 |
| 7.215 | 8.100 | 7.665 | 7.731 | 7.766 | 6.795 |
| 7.361 | 7.186 | 7.096 | 7.224 | 7.093 | 6.323 |
| 7.943 | 7.774 | 8.058 | 8.073 | 8.007 | 7.047 |
| 4.219 | 4.191 | 4.038 | 4.148 | 3.959 | 3.306 |
| 3.054 | 3.473 | 2.950 | 2.347 | 2.788 | 2.834 |
| 2.154 | 1.961 | 2.181 | 1.891 | 1.954 | 1.744 |
| 1.432 | 1.960 | 1.438 | 1.112 | 1.707 | 2.410 |
| 2.229 | 2.708 | 2.317 | 2.125 | 1.384 | 2.383 |
| 3.704 | 3.076 | 3.064 | 3.870 | 3.887 | 4.216 |
| 7.365 | 7.971 | 7.387 | 7.359 | 7.566 | 6.915 |



|       |       |       |       |       |       |
|-------|-------|-------|-------|-------|-------|
| 7.015 | 7.227 | 7.162 | 7.258 | 7.400 | 7.283 |
| 5.657 | 5.849 | 5.688 | 5.439 | 5.402 | 5.757 |
| 2.330 | 2.660 | 2.074 | 2.799 | 2.658 | 4.801 |
| 2.389 | 2.725 | 3.297 | 2.889 | 2.647 | 3.639 |
| 3.921 | 1.710 | 2.297 | 3.499 | 3.434 | 4.527 |
| 4.920 | 5.012 | 6.019 | 3.676 | 3.089 | 3.870 |
| 4.920 | 4.777 | 3.760 | 4.909 | 3.580 | 4.907 |
| 4.781 | 5.429 | 5.292 | 4.778 | 4.969 | 3.779 |
| 3.764 | 2.750 | 3.649 | 3.147 | 3.482 | 5.680 |
| 8.331 | 8.853 | 8.380 | 9.146 | 9.077 | 9.951 |
| 8.044 | 6.617 | 5.304 | 7.145 | 7.345 | 6.366 |
| 3.994 | 3.493 | 3.542 | 3.097 | 3.626 | 4.201 |
| 4.127 | 4.172 | 4.369 | 3.716 | 4.067 | 2.836 |
| 7.064 | 7.177 | 6.625 | 7.403 | 7.352 | 8.785 |
| 8.390 | 8.655 | 8.214 | 8.528 | 8.381 | 6.918 |
| 3.090 | 3.880 | 3.334 | 3.369 | 3.434 | 3.469 |
| 3.410 | 3.945 | 3.321 | 3.661 | 3.122 | 3.922 |
| 8.208 | 8.359 | 8.261 | 8.106 | 8.099 | 8.635 |
| 5.082 | 4.943 | 4.857 | 4.782 | 4.970 | 5.317 |
| 2.445 | 2.902 | 1.917 | 2.279 | 2.493 | 1.950 |
| 3.097 | 2.888 | 2.745 | 2.160 | 2.408 | 1.612 |
| 4.350 | 4.340 | 4.504 | 4.371 | 4.416 | 3.901 |
| 5.393 | 4.844 | 5.223 | 5.244 | 4.979 | 3.830 |
| 7.508 | 7.752 | 7.849 | 8.364 | 8.109 | 9.428 |
| 4.066 | 4.602 | 4.484 | 4.447 | 4.347 | 5.189 |
| 2.415 | 1.645 | 3.054 | 1.512 | 2.222 | 2.521 |
| 3.923 | 3.812 | 4.277 | 3.957 | 3.991 | 2.985 |
| 3.927 | 3.808 | 3.937 | 3.986 | 4.366 | 4.991 |
| 6.457 | 6.634 | 6.367 | 6.493 | 6.322 | 6.110 |
| 3.851 | 4.321 | 4.597 | 4.242 | 4.373 | 4.916 |
| 2.491 | 2.864 | 3.693 | 3.399 | 3.085 | 2.163 |
| 6.112 | 6.239 | 6.315 | 5.679 | 6.085 | 4.004 |
| 6.428 | 6.162 | 5.906 | 6.330 | 5.866 | 3.762 |
| 5.885 | 6.277 | 5.948 | 5.992 | 5.811 | 3.285 |
| 6.229 | 5.882 | 6.202 | 5.679 | 5.685 | 3.190 |
| 8.536 | 8.707 | 8.660 | 8.834 | 8.768 | 7.272 |
| 7.262 | 7.422 | 7.176 | 7.492 | 7.375 | 7.107 |
| 3.942 | 4.106 | 3.941 | 4.413 | 4.821 | 5.977 |
| 2.459 | 2.970 | 2.760 | 2.470 | 3.229 | 3.070 |
| 3.421 | 3.077 | 3.143 | 3.186 | 3.663 | 2.070 |
| 6.492 | 5.672 | 5.357 | 6.169 | 6.332 | 5.953 |
| 6.169 | 5.233 | 4.846 | 4.818 | 5.047 | 4.389 |
| 5.355 | 4.203 | 4.746 | 4.330 | 4.959 | 2.431 |
| 2.777 | 2.888 | 2.487 | 2.129 | 2.367 | 1.941 |
| 7.093 | 7.349 | 7.088 | 7.059 | 7.103 | 5.988 |
| 3.059 | 3.163 | 3.330 | 2.548 | 2.979 | 4.030 |
| 5.682 | 5.014 | 5.428 | 5.467 | 5.577 | 5.556 |
| 7.286 | 7.714 | 7.431 | 7.266 | 7.821 | 5.347 |
| 5.353 | 4.711 | 4.189 | 4.047 | 4.428 | 4.846 |
| 2.924 | 2.928 | 3.254 | 2.852 | 3.123 | 3.878 |

|       |       |       |       |       |       |
|-------|-------|-------|-------|-------|-------|
| 5.118 | 5.306 | 5.317 | 5.170 | 5.185 | 4.078 |
| 3.965 | 4.407 | 4.691 | 4.396 | 4.388 | 3.271 |
| 5.757 | 6.093 | 6.261 | 6.034 | 6.020 | 5.570 |
| 4.119 | 2.063 | 4.108 | 4.355 | 4.134 | 1.617 |
| 8.099 | 8.041 | 8.085 | 8.307 | 8.198 | 7.535 |
| 5.554 | 5.333 | 4.473 | 4.827 | 5.441 | 5.914 |
| 2.902 | 3.559 | 3.445 | 3.304 | 3.629 | 2.719 |
| 3.878 | 3.525 | 4.521 | 3.946 | 3.661 | 4.233 |
| 5.967 | 6.817 | 6.486 | 6.355 | 6.689 | 5.656 |
| 8.016 | 7.984 | 8.042 | 8.219 | 8.030 | 5.713 |
| 6.152 | 6.071 | 6.505 | 6.363 | 5.943 | 4.655 |
| 7.220 | 7.264 | 6.990 | 7.024 | 7.327 | 8.109 |
| 1.965 | 2.258 | 1.887 | 1.645 | 2.242 | 1.894 |
| 4.304 | 4.855 | 4.683 | 4.406 | 4.793 | 3.267 |
| 4.226 | 3.951 | 3.929 | 3.883 | 4.015 | 3.028 |
| 6.303 | 5.839 | 5.768 | 5.371 | 5.068 | 4.258 |
| 3.470 | 4.236 | 4.363 | 3.509 | 3.463 | 4.769 |
| 8.565 | 8.449 | 8.484 | 8.199 | 8.301 | 8.302 |
| 6.344 | 6.248 | 6.122 | 6.865 | 7.075 | 8.228 |
| 7.874 | 8.047 | 7.936 | 7.890 | 7.930 | 6.480 |
| 4.362 | 3.453 | 4.044 | 3.938 | 4.476 | 3.532 |
| 2.996 | 2.779 | 2.688 | 2.486 | 2.651 | 3.025 |
| 5.386 | 5.296 | 5.582 | 6.066 | 6.070 | 7.941 |
| 6.654 | 7.085 | 7.011 | 6.659 | 6.762 | 7.342 |
| 7.448 | 7.486 | 7.715 | 7.480 | 7.591 | 5.746 |
| 6.732 | 6.818 | 6.347 | 6.137 | 6.484 | 7.111 |
| 5.800 | 6.247 | 5.872 | 5.833 | 6.033 | 5.504 |
| 2.780 | 3.712 | 2.924 | 2.750 | 2.959 | 3.955 |
| 6.224 | 6.560 | 6.487 | 6.119 | 6.512 | 7.099 |
| 4.386 | 3.263 | 3.945 | 3.836 | 4.066 | 3.471 |
| 5.897 | 6.203 | 6.381 | 5.622 | 6.129 | 6.634 |
| 4.375 | 3.994 | 4.110 | 4.032 | 3.695 | 3.824 |
| 2.671 | 3.157 | 2.671 | 2.451 | 2.843 | 3.217 |
| 3.864 | 3.579 | 4.194 | 4.139 | 4.463 | 5.982 |
| 3.856 | 2.879 | 3.352 | 4.114 | 2.858 | 3.702 |
| 5.389 | 5.521 | 5.647 | 5.518 | 5.669 | 5.904 |
| 4.377 | 4.856 | 4.723 | 4.546 | 4.351 | 5.261 |
| 5.368 | 5.140 | 5.189 | 5.392 | 5.148 | 4.255 |
| 5.652 | 5.558 | 5.866 | 5.991 | 5.388 | 4.773 |
| 7.273 | 5.293 | 4.996 | 4.026 | 5.513 | 5.613 |
| 4.481 | 4.265 | 4.768 | 3.854 | 4.222 | 4.543 |
| 7.132 | 6.905 | 6.853 | 6.308 | 6.536 | 7.544 |
| 1.840 | 2.290 | 1.805 | 1.724 | 1.206 | 1.790 |
| 1.313 | 1.004 | 1.925 | 1.417 | 1.212 | 3.205 |
| 2.951 | 2.899 | 2.535 | 2.375 | 3.448 | 2.153 |
| 6.349 | 5.691 | 5.802 | 6.073 | 6.006 | 2.309 |
| 4.361 | 4.021 | 3.844 | 4.559 | 4.069 | 1.860 |
| 7.443 | 7.257 | 7.213 | 7.229 | 6.841 | 3.316 |
| 6.777 | 7.096 | 6.583 | 6.732 | 6.995 | 7.680 |
| 6.052 | 6.160 | 5.671 | 6.312 | 5.993 | 5.657 |

|       |       |       |       |       |        |
|-------|-------|-------|-------|-------|--------|
| 4.651 | 4.560 | 4.356 | 4.676 | 5.050 | 5.078  |
| 3.913 | 3.494 | 4.417 | 4.298 | 4.607 | 5.151  |
| 5.443 | 5.343 | 5.178 | 4.989 | 5.273 | 5.323  |
| 2.048 | 2.177 | 2.058 | 1.874 | 1.717 | 2.099  |
| 5.391 | 5.486 | 5.154 | 5.310 | 5.331 | 4.220  |
| 2.815 | 2.832 | 3.167 | 3.071 | 3.167 | 3.728  |
| 4.041 | 4.381 | 4.265 | 5.276 | 4.960 | 6.805  |
| 3.367 | 3.132 | 2.824 | 3.504 | 3.360 | 4.066  |
| 8.065 | 8.598 | 8.218 | 9.293 | 9.345 | 10.681 |
| 3.775 | 4.212 | 3.790 | 4.771 | 5.420 | 6.743  |
| 7.241 | 7.748 | 7.471 | 7.571 | 7.729 | 7.876  |
| 6.899 | 7.075 | 7.382 | 7.315 | 7.154 | 6.012  |
| 5.418 | 4.771 | 4.301 | 4.755 | 5.287 | 7.195  |
| 2.948 | 2.919 | 3.137 | 2.942 | 3.241 | 3.897  |
| 4.030 | 3.437 | 3.606 | 3.441 | 3.959 | 4.743  |
| 5.538 | 6.531 | 5.889 | 5.973 | 6.098 | 4.517  |
| 2.500 | 2.178 | 2.707 | 2.896 | 2.221 | 3.930  |
| 2.502 | 3.083 | 2.387 | 2.023 | 2.961 | 3.240  |
| 3.028 | 3.584 | 3.257 | 3.685 | 3.584 | 4.374  |
| 6.575 | 7.074 | 6.737 | 6.831 | 6.748 | 5.661  |
| 4.202 | 4.557 | 4.268 | 4.782 | 4.548 | 3.224  |
| 7.315 | 7.385 | 7.266 | 7.320 | 6.906 | 4.743  |
| 2.617 | 2.191 | 0.974 | 2.115 | 1.868 | 2.985  |
| 3.110 | 3.821 | 4.883 | 2.745 | 3.003 | 3.282  |
| 7.334 | 7.528 | 7.583 | 7.266 | 7.341 | 6.690  |
| 3.037 | 2.687 | 2.734 | 3.071 | 3.131 | 2.039  |
| 3.634 | 2.641 | 2.954 | 2.831 | 3.743 | 3.221  |
| 4.879 | 4.447 | 5.142 | 5.089 | 4.885 | 3.610  |
| 8.012 | 7.990 | 7.849 | 7.495 | 7.458 | 5.352  |
| 6.145 | 6.078 | 6.781 | 6.439 | 6.564 | 5.280  |
| 3.727 | 2.462 | 3.642 | 3.494 | 3.201 | 2.299  |
| 6.291 | 6.156 | 6.143 | 6.069 | 6.476 | 4.777  |
| 4.695 | 4.032 | 4.583 | 4.925 | 4.810 | 4.202  |
| 7.204 | 7.557 | 7.465 | 7.389 | 7.339 | 3.925  |
| 6.305 | 5.805 | 5.998 | 6.261 | 6.044 | 6.226  |
| 3.652 | 3.202 | 3.516 | 3.219 | 3.623 | 4.404  |
| 6.316 | 5.902 | 6.222 | 6.232 | 5.982 | 3.251  |
| 3.048 | 2.941 | 2.818 | 3.604 | 3.453 | 3.966  |
| 4.364 | 4.286 | 4.046 | 4.078 | 4.145 | 2.978  |
| 5.757 | 5.918 | 5.463 | 5.367 | 5.640 | 6.454  |
| 2.861 | 3.224 | 3.285 | 3.494 | 2.875 | 3.071  |
| 2.752 | 3.440 | 2.901 | 2.724 | 3.448 | 3.458  |
| 7.207 | 7.618 | 7.634 | 7.474 | 7.248 | 6.816  |
| 5.134 | 5.306 | 5.519 | 5.465 | 5.332 | 5.779  |
| 2.183 | 1.704 | 1.728 | 2.465 | 2.628 | 2.852  |
| 4.262 | 4.464 | 4.430 | 4.478 | 4.476 | 5.787  |
| 7.548 | 7.944 | 7.644 | 7.876 | 7.914 | 8.686  |
| 3.584 | 4.324 | 4.213 | 5.272 | 5.286 | 6.835  |
| 7.589 | 7.580 | 7.429 | 7.750 | 7.781 | 7.415  |
| 6.504 | 6.612 | 6.473 | 6.863 | 6.720 | 5.102  |

|       |       |       |       |       |       |
|-------|-------|-------|-------|-------|-------|
| 3.734 | 2.181 | 2.371 | 3.393 | 2.602 | 2.408 |
| 3.562 | 3.699 | 3.482 | 3.352 | 2.943 | 3.749 |
| 3.580 | 4.108 | 3.884 | 4.210 | 4.288 | 4.761 |
| 5.778 | 5.957 | 5.969 | 5.903 | 6.065 | 2.946 |
| 7.647 | 8.016 | 7.769 | 7.616 | 7.825 | 7.053 |
| 3.431 | 3.148 | 2.769 | 3.411 | 3.298 | 3.727 |
| 4.681 | 5.335 | 5.354 | 5.515 | 5.640 | 6.031 |
| 6.731 | 7.221 | 7.089 | 7.966 | 8.072 | 9.434 |
| 5.681 | 6.331 | 6.310 | 6.170 | 6.058 | 5.300 |
| 3.011 | 2.448 | 2.609 | 2.073 | 2.494 | 2.300 |
| 4.563 | 4.570 | 4.743 | 4.991 | 4.985 | 4.796 |
| 5.122 | 4.415 | 4.711 | 4.442 | 4.282 | 3.811 |
| 3.755 | 4.009 | 3.994 | 4.075 | 4.651 | 3.382 |
| 7.843 | 7.068 | 6.936 | 7.990 | 7.868 | 8.430 |
| 8.223 | 8.403 | 8.282 | 8.244 | 7.799 | 7.222 |
| 4.548 | 4.693 | 4.940 | 4.917 | 5.224 | 3.840 |
| 6.194 | 6.273 | 6.196 | 5.772 | 6.333 | 5.961 |
| 2.443 | 3.057 | 3.033 | 4.227 | 3.744 | 5.053 |
| 3.179 | 2.977 | 3.314 | 2.875 | 2.997 | 4.477 |
| 5.951 | 6.011 | 5.897 | 6.111 | 5.734 | 4.592 |
| 6.142 | 6.619 | 6.322 | 6.207 | 6.380 | 5.692 |
| 6.272 | 6.041 | 6.380 | 6.233 | 6.085 | 6.593 |
| 6.004 | 5.659 | 6.451 | 6.049 | 6.555 | 5.970 |
| 6.800 | 6.885 | 6.543 | 6.834 | 6.853 | 5.936 |
| 4.349 | 4.325 | 4.159 | 4.144 | 4.348 | 2.200 |
| 5.604 | 5.649 | 5.616 | 5.511 | 5.831 | 4.831 |
| 5.622 | 4.881 | 4.711 | 5.305 | 4.746 | 4.442 |
| 5.112 | 4.237 | 4.640 | 4.322 | 5.122 | 5.674 |
| 3.193 | 3.278 | 2.939 | 3.645 | 3.289 | 5.307 |
| 4.425 | 4.857 | 4.660 | 4.147 | 4.484 | 3.975 |
| 7.013 | 5.881 | 6.938 | 5.682 | 5.474 | 4.515 |
| 3.614 | 3.463 | 3.913 | 4.187 | 3.780 | 3.968 |
| 2.089 | 2.071 | 1.634 | 1.695 | 2.086 | 4.542 |
| 8.198 | 8.597 | 8.103 | 7.530 | 7.877 | 7.302 |
| 3.574 | 3.633 | 3.491 | 3.215 | 2.994 | 4.965 |
| 1.997 | 3.167 | 3.011 | 3.111 | 2.435 | 2.007 |
| 8.963 | 8.313 | 8.766 | 9.176 | 8.757 | 8.787 |
| 8.338 | 7.966 | 8.273 | 7.941 | 8.229 | 7.633 |
| 5.056 | 5.224 | 5.184 | 5.673 | 6.177 | 8.104 |
| 4.975 | 4.961 | 4.772 | 5.069 | 5.273 | 5.756 |
| 7.252 | 7.198 | 7.546 | 7.381 | 7.354 | 6.449 |
| 4.590 | 5.172 | 4.967 | 4.798 | 5.210 | 5.001 |
| 6.619 | 6.037 | 6.068 | 6.147 | 5.747 | 5.758 |
| 3.557 | 4.017 | 3.907 | 4.112 | 3.843 | 4.734 |
| 2.743 | 3.460 | 3.656 | 3.155 | 3.251 | 2.580 |
| 3.582 | 3.631 | 3.782 | 3.445 | 3.737 | 4.081 |
| 5.782 | 6.450 | 5.962 | 5.707 | 6.206 | 7.627 |
| 7.767 | 7.685 | 7.793 | 7.839 | 7.867 | 7.098 |
| 5.851 | 5.248 | 5.346 | 5.504 | 4.752 | 4.188 |
| 7.418 | 7.951 | 7.676 | 7.387 | 7.791 | 5.970 |

|       |       |       |       |       |       |
|-------|-------|-------|-------|-------|-------|
| 4.765 | 5.344 | 4.812 | 4.683 | 4.065 | 4.969 |
| 3.801 | 2.675 | 2.782 | 2.811 | 2.298 | 3.697 |
| 7.005 | 6.033 | 5.552 | 6.289 | 5.983 | 7.009 |
| 4.526 | 4.063 | 4.549 | 4.473 | 4.383 | 4.365 |
| 3.253 | 3.799 | 3.952 | 3.227 | 3.745 | 2.847 |
| 2.461 | 2.933 | 2.786 | 3.053 | 2.897 | 4.044 |
| 4.731 | 4.871 | 4.702 | 4.662 | 4.802 | 5.544 |
| 6.939 | 7.199 | 7.082 | 6.780 | 6.954 | 6.070 |
| 3.380 | 2.800 | 3.335 | 3.596 | 3.818 | 2.652 |
| 8.126 | 8.041 | 8.282 | 7.965 | 8.003 | 6.802 |
| 2.384 | 3.013 | 2.775 | 2.721 | 2.683 | 2.264 |
| 3.607 | 3.360 | 3.498 | 3.701 | 3.783 | 4.736 |
| 6.866 | 7.066 | 7.059 | 6.835 | 7.012 | 5.588 |
| 4.777 | 4.329 | 5.172 | 4.369 | 4.941 | 4.393 |
| 4.828 | 4.823 | 4.717 | 4.452 | 5.047 | 4.264 |
| 5.794 | 4.850 | 5.166 | 5.304 | 5.041 | 6.193 |
| 5.286 | 4.938 | 5.003 | 5.095 | 4.870 | 3.875 |
| 4.021 | 4.787 | 4.716 | 4.661 | 4.505 | 3.908 |
| 6.217 | 6.046 | 6.149 | 5.989 | 6.143 | 5.296 |
| 6.016 | 5.682 | 6.119 | 6.237 | 5.661 | 5.153 |
| 4.014 | 3.571 | 3.871 | 4.549 | 3.875 | 4.833 |
| 6.061 | 5.583 | 4.993 | 5.905 | 4.610 | 3.702 |
| 3.035 | 3.136 | 3.154 | 3.219 | 2.242 | 2.549 |
| 7.059 | 6.950 | 6.763 | 6.927 | 7.120 | 6.097 |
| 5.917 | 4.553 | 5.652 | 6.348 | 5.228 | 6.099 |
| 6.483 | 6.899 | 6.774 | 6.565 | 6.459 | 5.932 |
| 6.396 | 6.184 | 6.495 | 6.115 | 6.457 | 3.710 |
| 3.591 | 2.982 | 2.920 | 2.024 | 2.611 | 2.970 |
| 7.338 | 7.616 | 7.618 | 7.639 | 7.330 | 3.830 |
| 4.279 | 3.793 | 3.399 | 4.541 | 3.469 | 2.935 |
| 7.674 | 7.833 | 7.848 | 7.749 | 7.783 | 7.405 |
| 7.087 | 6.990 | 7.160 | 6.616 | 6.883 | 4.845 |
| 9.886 | 9.855 | 9.656 | 9.790 | 9.630 | 8.911 |
| 2.676 | 2.969 | 2.720 | 2.214 | 2.518 | 2.948 |
| 5.467 | 4.905 | 5.167 | 5.560 | 5.556 | 6.366 |
| 2.292 | 2.883 | 2.611 | 2.601 | 2.373 | 3.423 |
| 2.699 | 2.351 | 2.616 | 2.888 | 2.794 | 2.887 |
| 7.005 | 6.844 | 7.011 | 7.021 | 7.028 | 6.351 |
| 2.471 | 2.429 | 2.894 | 2.189 | 3.046 | 2.724 |
| 2.893 | 2.856 | 2.720 | 2.595 | 2.292 | 3.854 |
| 5.726 | 5.737 | 5.817 | 5.981 | 5.648 | 4.997 |
| 5.267 | 5.540 | 5.809 | 5.314 | 5.185 | 4.198 |
| 6.840 | 5.844 | 6.555 | 5.854 | 6.869 | 8.197 |
| 2.551 | 3.434 | 3.217 | 2.774 | 3.575 | 2.939 |
| 4.920 | 4.924 | 5.417 | 5.320 | 5.384 | 5.791 |
| 4.536 | 4.233 | 3.872 | 4.024 | 4.019 | 5.270 |
| 4.746 | 4.194 | 4.351 | 4.921 | 4.820 | 5.515 |
| 4.017 | 3.536 | 4.117 | 3.930 | 3.158 | 2.066 |
| 3.533 | 2.931 | 3.844 | 3.886 | 3.631 | 2.167 |
| 3.424 | 3.345 | 2.939 | 3.609 | 3.373 | 4.636 |

|       |       |       |       |       |       |
|-------|-------|-------|-------|-------|-------|
| 4.309 | 4.580 | 4.418 | 4.264 | 4.309 | 4.607 |
| 5.348 | 5.485 | 5.663 | 5.495 | 5.272 | 4.827 |
| 3.598 | 2.303 | 2.583 | 2.769 | 3.420 | 2.271 |
| 7.544 | 7.419 | 7.520 | 7.260 | 7.447 | 6.513 |
| 4.819 | 5.474 | 5.306 | 4.837 | 5.169 | 5.310 |
| 4.480 | 4.874 | 4.649 | 4.564 | 4.546 | 2.430 |
| 5.179 | 5.433 | 5.589 | 4.777 | 5.091 | 4.112 |
| 2.037 | 2.267 | 3.069 | 3.429 | 3.645 | 3.032 |
| 4.966 | 5.101 | 5.133 | 5.690 | 5.483 | 4.280 |
| 1.877 | 1.850 | 1.866 | 1.539 | 1.693 | 1.116 |
| 7.260 | 7.046 | 7.148 | 7.170 | 7.095 | 6.163 |
| 3.964 | 4.619 | 4.634 | 4.437 | 4.979 | 4.920 |
| 6.313 | 6.736 | 6.626 | 6.417 | 6.735 | 5.578 |
| 3.621 | 4.241 | 4.419 | 4.120 | 4.681 | 3.640 |
| 2.867 | 2.817 | 2.881 | 3.097 | 3.265 | 4.399 |
| 3.653 | 1.914 | 3.144 | 3.359 | 2.553 | 2.329 |
| 2.977 | 2.537 | 2.901 | 3.546 | 3.410 | 4.944 |
| 2.033 | 2.475 | 2.058 | 2.322 | 1.791 | 3.708 |
| 3.603 | 2.664 | 3.863 | 3.136 | 3.838 | 3.169 |
| 3.866 | 3.501 | 3.525 | 3.699 | 3.091 | 3.681 |
| 5.318 | 5.440 | 4.885 | 5.101 | 5.164 | 3.672 |
| 3.497 | 3.943 | 2.634 | 2.634 | 2.878 | 2.236 |
| 3.075 | 3.210 | 2.847 | 2.209 | 2.304 | 2.999 |
| 2.566 | 2.835 | 2.835 | 2.393 | 2.650 | 2.679 |
| 3.344 | 4.092 | 2.985 | 4.271 | 3.728 | 2.107 |
| 4.972 | 4.798 | 3.078 | 4.778 | 4.870 | 4.677 |
| 3.573 | 4.261 | 4.347 | 4.317 | 3.803 | 4.261 |
| 3.105 | 2.939 | 2.711 | 2.718 | 3.140 | 3.140 |
| 1.973 | 1.750 | 1.963 | 2.252 | 2.638 | 2.205 |
| 3.528 | 2.824 | 3.341 | 3.704 | 2.955 | 2.501 |
| 7.976 | 8.389 | 8.333 | 8.073 | 8.220 | 6.695 |
| 5.392 | 5.255 | 5.166 | 4.847 | 5.064 | 4.149 |
| 4.171 | 4.678 | 4.360 | 4.827 | 4.779 | 6.221 |
| 6.687 | 6.457 | 6.481 | 6.386 | 5.755 | 5.129 |
| 4.247 | 5.008 | 4.603 | 4.908 | 2.926 | 4.647 |
| 5.263 | 5.284 | 3.436 | 3.970 | 5.287 | 3.663 |
| 3.330 | 3.593 | 2.792 | 3.938 | 3.430 | 2.944 |
| 6.209 | 7.208 | 6.474 | 6.624 | 6.799 | 5.616 |
| 3.679 | 3.937 | 4.114 | 4.409 | 4.444 | 5.065 |
| 4.048 | 4.720 | 3.788 | 4.454 | 4.417 | 4.334 |
| 4.916 | 5.436 | 5.455 | 4.863 | 4.933 | 4.289 |
| 5.898 | 6.137 | 5.832 | 6.075 | 5.937 | 4.106 |
| 2.896 | 3.543 | 3.434 | 2.733 | 2.975 | 1.075 |
| 2.658 | 2.783 | 3.155 | 2.704 | 2.190 | 1.713 |
| 6.175 | 6.199 | 6.054 | 6.048 | 6.153 | 3.584 |
| 4.133 | 4.305 | 3.825 | 4.473 | 4.414 | 5.299 |
| 3.693 | 3.471 | 3.910 | 2.949 | 4.083 | 3.785 |
| 2.328 | 2.788 | 2.178 | 1.776 | 2.338 | 2.124 |
| 2.002 | 2.196 | 2.300 | 2.525 | 2.508 | 2.530 |
| 4.729 | 4.977 | 5.938 | 4.877 | 4.807 | 4.747 |

|       |       |       |       |       |       |
|-------|-------|-------|-------|-------|-------|
| 3.219 | 4.049 | 4.061 | 3.716 | 4.205 | 3.403 |
| 2.697 | 4.899 | 2.868 | 3.906 | 4.590 | 3.105 |
| 4.688 | 4.663 | 4.335 | 4.025 | 4.189 | 4.508 |
| 7.645 | 7.173 | 7.829 | 7.181 | 7.264 | 6.621 |
| 2.335 | 1.893 | 1.178 | 1.273 | 3.257 | 2.079 |
| 3.413 | 3.737 | 3.354 | 4.152 | 3.910 | 4.415 |
| 2.848 | 3.179 | 2.570 | 2.895 | 2.897 | 2.897 |
| 2.468 | 2.866 | 3.039 | 2.290 | 1.980 | 2.299 |
| 2.084 | 2.774 | 2.371 | 2.465 | 2.587 | 2.247 |
| 4.762 | 4.668 | 5.089 | 5.427 | 4.722 | 5.868 |
| 1.974 | 3.248 | 2.625 | 3.389 | 3.001 | 3.263 |
| 2.639 | 2.623 | 3.318 | 3.016 | 2.503 | 2.359 |
| 2.871 | 3.199 | 3.728 | 3.098 | 2.685 | 3.592 |
| 7.363 | 7.350 | 7.299 | 7.717 | 7.509 | 8.401 |
| 3.201 | 3.493 | 3.139 | 3.844 | 2.632 | 4.058 |
| 5.771 | 5.992 | 6.113 | 6.034 | 5.811 | 3.981 |
| 5.618 | 5.640 | 5.905 | 5.242 | 4.848 | 4.866 |
| 4.766 | 5.277 | 4.934 | 4.805 | 5.016 | 5.314 |
| 7.454 | 7.945 | 7.960 | 7.796 | 7.707 | 7.137 |
| 4.433 | 4.469 | 4.386 | 4.569 | 4.814 | 4.384 |
| 5.747 | 5.577 | 5.801 | 5.946 | 5.430 | 5.319 |
| 5.678 | 5.521 | 5.681 | 5.843 | 5.595 | 5.263 |
| 6.314 | 6.095 | 6.057 | 6.603 | 6.525 | 7.621 |
| 7.422 | 7.035 | 7.145 | 7.291 | 7.100 | 6.273 |
| 5.279 | 5.229 | 5.305 | 5.347 | 5.533 | 5.745 |
| 2.731 | 2.639 | 3.386 | 2.302 | 1.348 | 1.314 |
| 6.807 | 6.994 | 7.184 | 6.855 | 6.869 | 4.641 |
| 3.886 | 4.370 | 3.894 | 4.636 | 4.785 | 5.971 |
| 5.460 | 5.429 | 5.859 | 5.933 | 5.881 | 4.630 |
| 4.692 | 4.405 | 4.185 | 4.204 | 3.949 | 4.631 |
| 3.880 | 3.829 | 3.796 | 3.360 | 3.342 | 3.500 |
| 5.654 | 4.620 | 4.991 | 4.802 | 4.556 | 4.921 |
| 3.231 | 3.735 | 3.829 | 3.122 | 4.101 | 2.133 |
| 2.514 | 3.032 | 2.705 | 2.211 | 2.131 | 3.331 |
| 6.626 | 6.962 | 6.457 | 6.493 | 6.178 | 6.044 |
| 3.687 | 3.844 | 4.015 | 3.460 | 3.952 | 2.722 |
| 8.859 | 8.513 | 8.908 | 8.580 | 8.660 | 5.918 |
| 6.943 | 7.285 | 7.035 | 7.142 | 7.162 | 6.314 |
| 3.644 | 3.557 | 3.915 | 4.025 | 3.937 | 2.665 |
| 5.055 | 5.413 | 4.892 | 4.683 | 4.839 | 3.393 |
| 6.157 | 5.983 | 6.476 | 5.987 | 6.073 | 5.013 |
| 7.394 | 7.561 | 7.131 | 7.294 | 7.352 | 6.691 |
| 5.996 | 5.645 | 5.673 | 5.756 | 6.074 | 6.812 |
| 2.947 | 3.186 | 3.347 | 3.637 | 2.744 | 3.683 |
| 5.780 | 5.584 | 6.174 | 6.142 | 6.293 | 4.909 |
| 5.278 | 5.050 | 5.466 | 5.082 | 5.279 | 5.496 |
| 5.499 | 4.494 | 5.633 | 4.960 | 5.175 | 4.588 |
| 5.667 | 5.162 | 6.070 | 5.486 | 5.788 | 5.145 |
| 6.669 | 6.689 | 6.938 | 6.729 | 6.597 | 6.292 |
| 6.367 | 6.239 | 6.497 | 6.606 | 6.515 | 5.880 |

|       |       |       |       |       |       |
|-------|-------|-------|-------|-------|-------|
| 6.931 | 6.421 | 6.816 | 6.794 | 6.615 | 5.555 |
| 6.809 | 6.958 | 6.620 | 7.147 | 7.061 | 7.807 |
| 6.539 | 7.051 | 6.723 | 6.425 | 6.549 | 5.280 |
| 6.339 | 6.289 | 6.095 | 5.808 | 5.785 | 4.131 |
| 3.430 | 3.049 | 4.097 | 4.166 | 3.935 | 1.511 |
| 6.373 | 6.152 | 6.351 | 6.099 | 6.270 | 4.242 |
| 5.500 | 5.253 | 5.311 | 4.826 | 5.096 | 4.017 |
| 5.462 | 5.581 | 5.714 | 5.050 | 5.786 | 5.240 |
| 4.187 | 4.597 | 4.917 | 4.082 | 4.314 | 4.390 |
| 7.232 | 7.301 | 7.295 | 7.424 | 7.627 | 8.504 |
| 5.418 | 5.717 | 5.700 | 6.131 | 6.312 | 5.671 |
| 8.814 | 8.793 | 8.894 | 9.013 | 9.039 | 7.049 |
| 2.546 | 2.546 | 3.444 | 2.455 | 2.874 | 1.624 |
| 3.496 | 2.800 | 2.294 | 2.603 | 3.056 | 2.410 |
| 6.707 | 6.513 | 7.028 | 5.429 | 6.387 | 6.503 |
| 3.026 | 4.143 | 4.635 | 1.873 | 2.753 | 3.067 |
| 5.015 | 5.569 | 5.242 | 4.436 | 5.434 | 6.152 |
| 3.328 | 3.619 | 3.914 | 3.407 | 3.900 | 5.019 |
| 3.224 | 3.655 | 3.474 | 2.707 | 3.043 | 3.819 |
| 2.243 | 1.048 | 2.506 | 1.400 | 1.509 | 2.730 |
| 3.817 | 3.555 | 3.785 | 3.729 | 3.598 | 4.639 |
| 2.240 | 2.439 | 2.783 | 2.753 | 2.970 | 3.025 |
| 5.578 | 5.788 | 4.945 | 5.327 | 5.547 | 6.257 |
| 2.961 | 3.288 | 3.375 | 3.667 | 3.734 | 2.496 |
| 7.575 | 8.126 | 7.745 | 7.602 | 7.901 | 7.186 |
| 3.664 | 4.047 | 3.861 | 4.312 | 3.990 | 4.779 |
| 3.652 | 3.645 | 3.810 | 3.666 | 3.813 | 3.977 |
| 5.065 | 6.166 | 6.101 | 5.846 | 6.222 | 2.292 |
| 2.320 | 2.931 | 3.674 | 2.103 | 2.427 | 2.675 |
| 3.777 | 3.487 | 3.520 | 3.663 | 3.228 | 2.008 |
| 5.282 | 5.388 | 5.382 | 4.839 | 4.581 | 3.884 |
| 3.108 | 3.072 | 2.998 | 2.995 | 3.195 | 4.720 |
| 1.821 | 1.887 | 2.380 | 1.951 | 1.216 | 2.459 |
| 3.962 | 3.774 | 3.518 | 3.677 | 3.641 | 2.561 |
| 5.848 | 5.644 | 5.568 | 5.991 | 5.867 | 4.944 |
| 3.224 | 3.073 | 3.423 | 3.226 | 3.578 | 4.622 |
| 3.193 | 2.958 | 3.908 | 3.634 | 3.286 | 2.649 |
| 4.317 | 4.326 | 4.628 | 3.915 | 3.905 | 4.368 |
| 5.597 | 5.749 | 5.892 | 6.222 | 5.862 | 4.039 |
| 5.060 | 5.169 | 5.210 | 5.307 | 5.321 | 3.818 |
| 7.706 | 7.938 | 7.738 | 7.639 | 7.693 | 5.097 |
| 2.576 | 3.185 | 2.323 | 3.176 | 2.824 | 3.250 |
| 5.501 | 3.750 | 4.691 | 5.834 | 4.646 | 4.135 |
| 4.071 | 2.938 | 3.047 | 3.455 | 3.191 | 2.603 |
| 3.637 | 3.016 | 3.020 | 3.316 | 3.903 | 2.563 |
| 3.449 | 3.593 | 3.690 | 3.492 | 3.497 | 2.352 |
| 1.981 | 1.491 | 1.178 | 1.370 | 1.540 | 1.933 |
| 5.700 | 6.090 | 5.840 | 5.591 | 5.697 | 4.667 |
| 2.271 | 1.646 | 1.650 | 1.757 | 1.482 | 1.520 |
| 3.569 | 3.462 | 3.629 | 3.272 | 3.260 | 3.787 |



|       |       |       |       |       |       |
|-------|-------|-------|-------|-------|-------|
| 4.963 | 4.348 | 5.052 | 5.646 | 5.449 | 5.501 |
| 5.834 | 6.297 | 6.126 | 6.246 | 6.626 | 7.622 |
| 6.306 | 5.907 | 5.561 | 6.406 | 6.656 | 7.129 |
| 6.388 | 5.749 | 5.849 | 5.413 | 5.898 | 6.310 |
| 3.306 | 3.253 | 3.206 | 3.261 | 2.872 | 3.590 |
| 6.038 | 6.895 | 6.434 | 6.343 | 6.438 | 5.785 |
| 2.669 | 2.723 | 3.232 | 2.349 | 3.248 | 1.708 |
| 3.512 | 3.954 | 4.340 | 3.783 | 3.648 | 2.019 |
| 4.097 | 4.379 | 3.835 | 3.189 | 3.867 | 3.790 |
| 5.616 | 4.524 | 3.527 | 5.084 | 5.536 | 4.445 |
| 6.996 | 6.879 | 6.655 | 6.887 | 6.890 | 5.863 |
| 5.669 | 5.559 | 5.526 | 5.419 | 5.509 | 5.982 |
| 2.313 | 2.769 | 2.594 | 2.840 | 2.548 | 3.001 |
| 6.725 | 6.803 | 6.957 | 6.424 | 6.722 | 6.233 |
| 3.880 | 4.390 | 4.750 | 4.340 | 3.995 | 4.389 |
| 3.901 | 4.226 | 4.457 | 4.775 | 5.274 | 3.937 |
| 2.036 | 1.775 | 2.168 | 2.040 | 2.285 | 2.571 |
| 5.760 | 5.717 | 5.961 | 5.234 | 5.678 | 5.487 |
| 4.672 | 4.688 | 4.423 | 4.521 | 4.372 | 4.899 |
| 5.008 | 5.099 | 5.094 | 4.914 | 5.152 | 3.402 |
| 4.534 | 4.811 | 4.452 | 4.472 | 4.343 | 2.351 |
| 6.735 | 6.296 | 6.809 | 6.690 | 6.508 | 6.344 |
| 5.228 | 5.114 | 4.709 | 4.861 | 4.902 | 5.122 |
| 3.890 | 3.245 | 3.368 | 3.782 | 3.889 | 4.815 |
| 9.021 | 8.761 | 8.513 | 9.566 | 8.803 | 9.448 |
| 4.785 | 5.558 | 5.088 | 5.390 | 5.328 | 5.426 |
| 3.660 | 3.494 | 3.985 | 2.748 | 3.551 | 3.601 |
| 3.474 | 3.819 | 3.800 | 3.099 | 3.112 | 3.585 |
| 6.383 | 6.647 | 6.517 | 6.606 | 6.523 | 6.916 |
| 2.128 | 1.379 | 2.116 | 2.195 | 1.926 | 1.875 |
| 5.933 | 5.604 | 6.348 | 5.714 | 5.748 | 4.249 |
| 3.235 | 2.957 | 3.060 | 2.710 | 3.387 | 4.140 |
| 5.434 | 5.112 | 5.226 | 4.582 | 5.246 | 3.681 |
| 3.695 | 1.614 | 2.689 | 2.493 | 2.630 | 1.116 |
| 3.443 | 4.116 | 3.511 | 4.318 | 3.838 | 4.719 |
| 1.573 | 2.609 | 2.030 | 2.506 | 2.779 | 2.438 |
| 2.480 | 2.161 | 1.877 | 2.788 | 2.447 | 2.329 |
| 3.171 | 2.437 | 2.219 | 2.102 | 3.247 | 2.259 |
| 3.193 | 2.508 | 3.699 | 3.283 | 3.213 | 2.270 |
| 2.359 | 2.566 | 2.440 | 2.292 | 1.796 | 2.374 |
| 2.030 | 2.639 | 2.432 | 2.937 | 2.695 | 1.650 |
| 1.964 | 1.913 | 3.291 | 2.293 | 2.727 | 3.125 |
| 2.351 | 3.038 | 2.762 | 3.323 | 3.489 | 3.674 |
| 5.752 | 4.905 | 5.503 | 5.341 | 5.232 | 3.844 |
| 4.001 | 4.583 | 4.829 | 4.427 | 4.954 | 3.179 |
| 3.173 | 3.158 | 3.089 | 2.223 | 3.058 | 3.793 |
| 5.232 | 5.055 | 5.348 | 5.408 | 5.140 | 4.796 |
| 3.668 | 2.343 | 2.191 | 2.399 | 2.654 | 2.864 |
| 3.399 | 2.995 | 2.815 | 3.367 | 3.444 | 2.914 |
| 2.869 | 3.504 | 3.590 | 2.991 | 2.956 | 3.263 |

|       |       |       |       |       |        |
|-------|-------|-------|-------|-------|--------|
| 5.877 | 5.553 | 5.069 | 5.412 | 5.432 | 6.049  |
| 6.041 | 5.160 | 5.130 | 5.161 | 5.591 | 6.566  |
| 4.949 | 4.957 | 4.844 | 4.850 | 4.852 | 7.263  |
| 6.808 | 5.875 | 6.108 | 6.427 | 5.690 | 4.687  |
| 5.281 | 5.972 | 5.706 | 6.010 | 5.795 | 3.294  |
| 7.018 | 6.714 | 7.463 | 6.632 | 6.611 | 5.909  |
| 3.461 | 3.488 | 3.488 | 3.189 | 3.499 | 2.985  |
| 3.873 | 3.632 | 4.043 | 3.374 | 4.080 | 3.810  |
| 2.582 | 2.399 | 2.432 | 2.203 | 2.548 | 2.943  |
| 6.240 | 6.101 | 5.796 | 6.463 | 6.080 | 5.710  |
| 8.795 | 8.512 | 8.616 | 9.334 | 9.154 | 10.345 |
| 5.318 | 5.198 | 4.741 | 5.175 | 5.211 | 6.269  |
| 3.196 | 2.604 | 3.685 | 2.582 | 3.075 | 2.858  |
| 1.783 | 2.502 | 2.618 | 1.986 | 2.589 | 3.641  |
| 2.487 | 2.628 | 2.589 | 2.524 | 2.494 | 3.212  |
| 5.184 | 4.003 | 4.140 | 4.492 | 5.110 | 3.575  |
| 7.715 | 7.655 | 7.639 | 6.809 | 7.649 | 7.138  |
| 7.041 | 7.155 | 7.134 | 7.513 | 7.623 | 8.700  |
| 6.512 | 6.489 | 6.758 | 6.637 | 6.556 | 7.643  |
| 6.887 | 6.177 | 6.156 | 6.220 | 6.139 | 6.670  |
| 6.193 | 6.829 | 6.769 | 6.326 | 6.657 | 5.000  |
| 5.249 | 5.041 | 4.646 | 5.157 | 5.338 | 4.756  |
| 5.003 | 5.480 | 5.764 | 5.599 | 5.536 | 3.842  |
| 6.634 | 6.718 | 6.701 | 6.134 | 6.543 | 6.109  |
| 5.592 | 6.093 | 6.176 | 5.988 | 6.009 | 6.823  |
| 7.530 | 7.474 | 7.480 | 7.707 | 7.229 | 6.520  |
| 4.022 | 5.176 | 5.474 | 5.693 | 6.091 | 7.569  |
| 1.578 | 2.041 | 2.528 | 2.456 | 2.882 | 2.552  |
| 1.920 | 1.611 | 1.627 | 0.996 | 1.246 | 2.531  |
| 3.563 | 2.851 | 3.703 | 2.798 | 3.481 | 2.451  |
| 7.308 | 6.156 | 5.481 | 5.367 | 6.267 | 6.296  |
| 4.022 | 4.575 | 3.922 | 3.964 | 3.616 | 2.259  |
| 3.650 | 3.192 | 2.518 | 2.536 | 2.749 | 2.178  |
| 6.736 | 5.862 | 5.854 | 5.715 | 6.249 | 4.439  |
| 1.482 | 1.450 | 1.158 | 1.408 | 1.215 | 2.532  |
| 6.263 | 5.673 | 5.539 | 5.909 | 5.808 | 5.178  |
| 2.622 | 2.425 | 1.831 | 2.601 | 2.025 | 1.984  |
| 5.117 | 3.554 | 5.574 | 4.644 | 4.570 | 3.117  |
| 3.367 | 2.452 | 4.067 | 2.663 | 3.717 | 2.079  |
| 3.210 | 2.215 | 3.073 | 3.660 | 3.220 | 2.083  |
| 3.866 | 3.679 | 2.922 | 3.608 | 3.320 | 2.095  |
| 4.297 | 3.406 | 4.493 | 4.692 | 4.110 | 3.487  |
| 4.366 | 4.288 | 4.096 | 4.592 | 4.598 | 3.616  |
| 5.006 | 5.577 | 5.138 | 4.870 | 5.008 | 4.397  |
| 6.871 | 6.539 | 6.728 | 6.744 | 6.886 | 1.229  |
| 2.885 | 2.605 | 2.879 | 2.733 | 3.459 | 3.467  |
| 5.957 | 6.504 | 6.316 | 6.509 | 6.287 | 7.379  |
| 5.470 | 5.036 | 5.384 | 5.333 | 5.034 | 5.446  |
| 2.787 | 2.410 | 2.998 | 3.550 | 3.177 | 4.399  |
| 3.643 | 3.997 | 4.236 | 4.400 | 4.190 | 4.820  |

|        |        |        |        |        |        |
|--------|--------|--------|--------|--------|--------|
| 3.077  | 4.085  | 3.742  | 2.946  | 3.162  | 2.978  |
| 5.345  | 4.856  | 4.727  | 3.468  | 4.856  | 3.838  |
| 2.185  | 2.290  | 2.777  | 1.607  | 3.295  | 2.044  |
| 4.937  | 4.893  | 4.887  | 5.065  | 4.603  | 3.861  |
| 4.664  | 4.657  | 4.852  | 4.575  | 4.833  | 3.402  |
| 4.049  | 3.427  | 3.582  | 3.871  | 3.760  | 5.129  |
| 3.040  | 3.522  | 4.303  | 3.470  | 2.515  | 2.205  |
| 5.669  | 4.892  | 6.043  | 4.050  | 5.470  | 2.149  |
| 3.336  | 3.258  | 3.707  | 3.514  | 3.223  | 3.615  |
| 2.657  | 2.939  | 2.851  | 3.036  | 2.874  | 3.795  |
| 3.956  | 3.795  | 3.731  | 4.456  | 4.600  | 5.999  |
| 2.686  | 3.468  | 2.670  | 2.496  | 2.395  | 2.234  |
| 2.530  | 3.136  | 2.785  | 1.825  | 3.052  | 2.973  |
| 2.280  | 2.952  | 2.604  | 2.990  | 2.567  | 2.486  |
| 5.386  | 6.651  | 6.371  | 6.617  | 7.055  | 5.386  |
| 2.689  | 2.468  | 2.404  | 2.588  | 2.357  | 4.504  |
| 3.853  | 3.990  | 3.876  | 3.616  | 3.895  | 5.181  |
| 8.001  | 8.167  | 8.089  | 7.941  | 8.058  | 3.776  |
| 8.376  | 8.379  | 8.266  | 8.298  | 8.120  | 6.439  |
| 4.439  | 4.275  | 4.765  | 4.603  | 4.372  | 3.839  |
| 7.715  | 7.619  | 7.612  | 7.486  | 7.532  | 7.010  |
| 4.339  | 4.144  | 4.075  | 4.226  | 3.586  | 4.068  |
| 2.568  | 3.217  | 2.491  | 2.583  | 3.078  | 2.079  |
| 6.969  | 7.084  | 7.100  | 7.564  | 7.282  | 8.569  |
| 8.049  | 5.655  | 5.766  | 6.165  | 6.904  | 4.954  |
| 5.834  | 6.066  | 6.089  | 6.097  | 6.310  | 4.991  |
| 5.467  | 4.832  | 5.082  | 4.691  | 5.145  | 4.520  |
| 4.244  | 3.976  | 4.321  | 4.229  | 4.114  | 4.159  |
| 5.541  | 5.347  | 5.315  | 5.419  | 5.225  | 3.316  |
| 5.732  | 6.270  | 6.057  | 6.199  | 6.035  | 5.732  |
| 10.396 | 10.312 | 10.850 | 10.234 | 10.303 | 10.936 |
| 5.271  | 5.759  | 5.090  | 5.035  | 5.184  | 5.134  |
| 4.488  | 4.577  | 4.089  | 4.817  | 4.676  | 5.607  |
| 1.451  | 2.591  | 2.535  | 2.298  | 2.570  | 2.455  |
| 2.838  | 3.136  | 3.137  | 2.666  | 3.012  | 2.240  |
| 5.287  | 5.307  | 5.189  | 5.614  | 5.756  | 6.000  |
| 3.432  | 2.897  | 2.810  | 3.396  | 3.768  | 3.493  |
| 6.627  | 6.239  | 6.300  | 6.225  | 6.164  | 7.066  |
| 3.047  | 2.870  | 2.988  | 2.954  | 3.541  | 3.317  |
| 4.308  | 4.405  | 3.858  | 3.875  | 3.810  | 4.279  |
| 6.662  | 6.154  | 6.751  | 6.328  | 6.297  | 4.879  |
| 4.525  | 4.897  | 4.376  | 3.851  | 4.348  | 5.561  |
| 4.922  | 5.296  | 5.398  | 4.916  | 5.246  | 6.236  |
| 2.005  | 2.887  | 2.811  | 2.557  | 2.537  | 2.923  |
| 7.983  | 8.145  | 8.148  | 7.963  | 7.959  | 6.566  |
| 5.442  | 5.440  | 5.148  | 4.827  | 5.424  | 4.167  |
| 3.125  | 3.205  | 3.279  | 3.023  | 3.488  | 3.981  |
| 3.150  | 2.600  | 3.447  | 3.296  | 3.711  | 4.580  |
| 4.307  | 3.448  | 3.984  | 3.886  | 3.410  | 3.877  |
| 5.494  | 5.162  | 5.562  | 5.412  | 5.248  | 5.048  |

|       |       |       |       |       |       |
|-------|-------|-------|-------|-------|-------|
| 7.219 | 7.511 | 7.352 | 7.209 | 7.367 | 6.423 |
| 7.145 | 7.631 | 7.460 | 7.463 | 7.928 | 8.221 |
| 5.851 | 5.679 | 5.622 | 5.600 | 5.761 | 5.908 |
| 5.504 | 5.146 | 5.366 | 5.947 | 5.323 | 6.571 |
| 3.891 | 4.271 | 4.287 | 4.776 | 4.453 | 5.572 |
| 2.998 | 3.155 | 3.248 | 2.510 | 3.296 | 3.627 |
| 7.007 | 6.588 | 6.362 | 6.642 | 7.035 | 5.787 |
| 8.549 | 8.610 | 8.568 | 8.573 | 8.878 | 7.869 |
| 9.025 | 9.134 | 9.037 | 9.133 | 9.396 | 8.379 |
| 8.590 | 8.681 | 8.603 | 8.626 | 8.935 | 7.914 |
| 8.422 | 8.503 | 8.462 | 8.414 | 8.786 | 7.836 |
| 8.568 | 8.633 | 8.585 | 8.611 | 8.929 | 7.950 |
| 7.982 | 8.100 | 8.021 | 7.983 | 8.355 | 7.322 |
| 9.586 | 9.601 | 9.657 | 9.499 | 9.702 | 6.409 |
| 5.254 | 4.551 | 5.311 | 5.304 | 5.099 | 6.041 |
| 8.019 | 8.857 | 8.797 | 8.411 | 8.633 | 3.489 |
| 6.441 | 6.224 | 6.282 | 6.239 | 6.267 | 3.816 |
| 8.040 | 8.110 | 8.184 | 7.583 | 7.617 | 5.607 |
| 7.871 | 8.181 | 8.350 | 7.947 | 8.164 | 5.128 |
| 6.707 | 7.181 | 7.384 | 6.976 | 7.313 | 3.328 |
| 7.259 | 6.979 | 7.267 | 7.188 | 6.826 | 5.811 |
| 8.203 | 8.409 | 8.500 | 8.348 | 8.365 | 3.405 |
| 5.605 | 4.951 | 5.024 | 5.283 | 5.324 | 3.655 |
| 6.345 | 6.856 | 7.164 | 6.913 | 7.175 | 2.423 |
| 3.239 | 3.671 | 3.376 | 2.934 | 2.932 | 2.538 |
| 7.797 | 7.225 | 7.148 | 8.051 | 7.625 | 7.513 |
| 8.910 | 8.922 | 9.270 | 9.022 | 9.110 | 6.233 |
| 4.295 | 4.189 | 4.082 | 4.154 | 4.260 | 1.636 |
| 3.626 | 4.606 | 4.132 | 3.523 | 4.023 | 3.852 |
| 5.351 | 6.069 | 5.929 | 5.955 | 6.288 | 3.071 |
| 6.513 | 7.984 | 7.272 | 7.333 | 7.717 | 4.325 |
| 8.691 | 8.219 | 8.011 | 6.865 | 8.289 | 6.484 |
| 9.391 | 7.701 | 8.091 | 7.146 | 8.791 | 6.931 |
| 4.042 | 3.491 | 3.976 | 4.218 | 3.916 | 4.707 |
| 2.373 | 2.389 | 2.950 | 1.797 | 2.570 | 3.259 |
| 2.282 | 2.637 | 2.923 | 2.124 | 2.946 | 3.042 |
| 4.100 | 4.263 | 4.344 | 3.837 | 4.256 | 3.431 |
| 2.054 | 2.326 | 2.285 | 2.147 | 2.190 | 2.926 |
| 4.400 | 3.268 | 3.470 | 2.886 | 3.503 | 3.964 |
| 6.517 | 6.508 | 6.124 | 6.583 | 6.379 | 5.406 |
| 2.526 | 2.357 | 2.793 | 2.711 | 2.897 | 1.865 |
| 5.812 | 6.277 | 5.703 | 5.583 | 6.144 | 8.139 |
| 5.297 | 5.816 | 5.647 | 5.437 | 5.670 | 4.342 |
| 5.340 | 5.199 | 5.680 | 4.974 | 5.068 | 4.457 |
| 3.298 | 3.017 | 3.194 | 3.268 | 3.014 | 3.797 |
| 3.679 | 4.299 | 3.644 | 4.396 | 4.804 | 4.814 |
| 4.702 | 4.475 | 4.870 | 4.963 | 4.626 | 5.970 |
| 6.760 | 6.341 | 6.481 | 6.072 | 6.872 | 4.581 |
| 3.947 | 3.266 | 3.724 | 3.269 | 3.683 | 1.249 |
| 2.280 | 2.222 | 2.563 | 1.820 | 1.547 | 2.320 |

|        |        |       |       |       |        |
|--------|--------|-------|-------|-------|--------|
| 5.097  | 4.771  | 4.753 | 4.850 | 4.942 | 6.315  |
| 2.888  | 1.858  | 2.454 | 3.318 | 3.211 | 4.065  |
| 8.259  | 8.405  | 8.646 | 8.513 | 8.454 | 6.259  |
| 2.329  | 2.634  | 2.513 | 1.597 | 2.024 | 4.129  |
| 4.830  | 4.254  | 3.735 | 4.879 | 4.675 | 5.246  |
| 6.125  | 5.488  | 5.794 | 5.987 | 5.771 | 5.592  |
| 6.848  | 7.068  | 6.794 | 6.891 | 7.045 | 5.842  |
| 2.736  | 3.517  | 3.387 | 3.110 | 2.836 | 2.249  |
| 4.645  | 4.463  | 3.704 | 4.436 | 4.159 | 4.257  |
| 3.753  | 3.283  | 3.223 | 2.445 | 2.257 | 2.511  |
| 2.265  | 2.011  | 2.243 | 1.571 | 1.844 | 2.765  |
| 4.216  | 3.667  | 4.418 | 4.038 | 4.341 | 2.776  |
| 8.311  | 8.335  | 8.266 | 8.555 | 8.461 | 7.486  |
| 6.587  | 6.641  | 6.663 | 6.475 | 6.472 | 6.258  |
| 5.157  | 5.007  | 5.255 | 5.034 | 4.800 | 5.454  |
| 3.403  | 3.755  | 3.404 | 2.612 | 3.683 | 3.734  |
| 4.783  | 5.870  | 4.807 | 4.506 | 3.894 | 4.417  |
| 3.309  | 4.324  | 4.281 | 3.029 | 2.523 | 3.247  |
| 3.978  | 3.637  | 3.439 | 2.291 | 4.243 | 4.217  |
| 3.898  | 5.177  | 3.999 | 2.638 | 3.343 | 3.317  |
| 2.541  | 2.552  | 2.387 | 2.104 | 2.690 | 2.846  |
| 5.684  | 5.774  | 5.409 | 5.662 | 6.008 | 6.111  |
| 7.795  | 8.260  | 7.907 | 8.158 | 8.068 | 7.195  |
| 4.927  | 5.769  | 5.535 | 5.333 | 5.708 | 4.715  |
| 3.380  | 3.791  | 4.327 | 3.640 | 3.381 | 2.734  |
| 4.814  | 5.208  | 5.317 | 4.966 | 5.486 | 1.452  |
| 3.150  | 3.716  | 3.629 | 3.654 | 3.285 | 2.896  |
| 6.921  | 7.222  | 7.402 | 7.437 | 6.836 | 6.241  |
| 8.332  | 8.885  | 8.613 | 8.142 | 8.485 | 1.583  |
| 7.413  | 7.544  | 7.338 | 7.374 | 7.354 | 6.500  |
| 4.663  | 4.877  | 4.840 | 4.957 | 5.025 | 3.095  |
| 6.577  | 6.634  | 6.608 | 6.810 | 6.508 | 6.476  |
| 6.262  | 6.422  | 6.436 | 6.131 | 6.464 | 7.249  |
| 4.598  | 4.199  | 4.261 | 4.495 | 5.020 | 4.432  |
| 5.971  | 5.452  | 5.762 | 6.009 | 5.217 | 6.130  |
| 2.888  | 2.481  | 2.743 | 2.097 | 2.303 | 2.621  |
| 2.153  | 2.883  | 2.823 | 2.538 | 2.916 | 1.601  |
| 6.595  | 6.514  | 6.945 | 6.980 | 6.575 | 5.573  |
| 4.666  | 4.336  | 4.889 | 4.704 | 4.597 | 5.418  |
| 1.656  | 1.986  | 2.064 | 1.405 | 2.207 | 3.176  |
| 4.530  | 3.372  | 3.214 | 3.856 | 3.939 | 3.427  |
| 2.896  | 3.940  | 4.370 | 3.948 | 3.322 | 3.215  |
| 4.376  | 4.785  | 4.765 | 4.643 | 4.577 | 4.328  |
| 2.546  | 2.692  | 3.337 | 2.762 | 3.223 | 2.167  |
| 3.620  | 3.216  | 3.725 | 4.243 | 3.850 | 3.695  |
| 10.052 | 10.574 | 9.956 | 9.935 | 9.534 | 11.536 |
| 5.880  | 5.600  | 6.384 | 5.952 | 6.077 | 5.316  |
| 5.271  | 4.981  | 4.819 | 5.113 | 4.937 | 3.376  |
| 3.348  | 3.841  | 3.916 | 2.736 | 2.969 | 1.942  |
| 4.734  | 4.975  | 5.103 | 4.383 | 4.821 | 3.340  |

|       |       |       |       |       |       |
|-------|-------|-------|-------|-------|-------|
| 4.853 | 4.956 | 4.658 | 4.533 | 4.946 | 5.237 |
| 5.225 | 5.631 | 4.878 | 4.940 | 5.714 | 4.945 |
| 5.489 | 5.728 | 5.492 | 5.104 | 5.370 | 2.524 |
| 6.004 | 5.864 | 6.271 | 5.984 | 5.875 | 5.288 |
| 5.252 | 5.479 | 5.707 | 5.129 | 5.356 | 4.455 |
| 3.935 | 4.048 | 4.007 | 3.565 | 3.774 | 3.013 |
| 2.657 | 2.122 | 1.616 | 2.697 | 2.530 | 2.960 |
| 3.761 | 4.362 | 3.527 | 4.214 | 3.614 | 3.497 |
| 3.308 | 3.136 | 2.719 | 2.387 | 3.365 | 2.719 |
| 9.008 | 9.356 | 9.235 | 9.189 | 9.261 | 8.378 |
| 2.816 | 2.708 | 2.714 | 2.687 | 2.412 | 3.076 |
| 2.794 | 2.911 | 2.596 | 3.015 | 2.778 | 3.192 |
| 4.326 | 4.814 | 4.745 | 3.996 | 4.246 | 5.058 |
| 3.175 | 3.407 | 3.905 | 3.179 | 3.480 | 3.734 |
| 4.530 | 5.276 | 4.432 | 4.254 | 4.015 | 4.674 |
| 3.955 | 4.070 | 3.495 | 3.087 | 3.569 | 4.091 |
| 3.599 | 4.012 | 3.864 | 4.078 | 3.569 | 4.776 |
| 2.957 | 3.597 | 2.796 | 2.938 | 2.468 | 2.229 |
| 7.414 | 7.461 | 7.463 | 7.273 | 7.172 | 6.083 |
| 8.798 | 8.036 | 8.189 | 9.056 | 8.410 | 9.578 |
| 3.020 | 2.061 | 2.055 | 3.384 | 2.673 | 2.221 |
| 1.730 | 2.796 | 2.240 | 2.822 | 2.780 | 4.943 |
| 4.342 | 3.122 | 3.218 | 3.832 | 4.047 | 3.301 |
| 5.794 | 4.689 | 4.922 | 5.859 | 5.862 | 4.418 |
| 3.819 | 4.108 | 4.097 | 4.185 | 3.752 | 2.997 |
| 3.648 | 3.848 | 2.945 | 3.774 | 4.125 | 5.574 |
| 2.184 | 1.935 | 1.976 | 2.213 | 2.335 | 2.549 |
| 4.234 | 3.687 | 4.285 | 3.503 | 4.392 | 4.067 |
| 5.187 | 5.129 | 4.619 | 5.131 | 5.109 | 5.912 |
| 3.783 | 3.847 | 2.679 | 4.126 | 3.900 | 3.628 |
| 4.632 | 5.206 | 5.119 | 4.543 | 4.916 | 4.719 |
| 2.701 | 3.168 | 3.265 | 3.855 | 3.527 | 4.082 |
| 3.751 | 4.027 | 3.113 | 3.355 | 3.818 | 1.742 |
| 3.614 | 3.324 | 3.373 | 3.581 | 3.409 | 2.635 |
| 5.268 | 5.786 | 5.921 | 5.375 | 5.740 | 4.725 |
| 5.077 | 6.120 | 5.662 | 6.297 | 7.085 | 7.724 |
| 3.441 | 3.373 | 2.679 | 3.670 | 3.315 | 3.211 |
| 4.352 | 4.162 | 4.171 | 4.689 | 4.623 | 3.714 |
| 5.144 | 4.568 | 4.578 | 4.836 | 4.683 | 5.398 |
| 3.853 | 2.971 | 3.212 | 3.695 | 3.832 | 3.318 |
| 7.074 | 7.412 | 7.381 | 7.366 | 7.324 | 6.423 |
| 4.032 | 4.633 | 4.268 | 4.823 | 4.106 | 5.723 |
| 4.651 | 5.393 | 5.319 | 4.626 | 5.222 | 6.177 |
| 4.234 | 3.862 | 3.860 | 4.229 | 3.709 | 5.193 |
| 4.668 | 4.806 | 4.636 | 4.914 | 4.711 | 3.600 |
| 2.698 | 1.459 | 2.429 | 2.180 | 2.342 | 2.766 |
| 5.338 | 4.200 | 5.321 | 3.236 | 4.091 | 1.929 |
| 2.920 | 3.282 | 3.313 | 2.247 | 2.601 | 6.742 |
| 4.158 | 4.806 | 5.248 | 4.659 | 5.420 | 3.327 |
| 7.173 | 6.877 | 7.625 | 6.734 | 6.602 | 3.539 |

|        |        |        |        |        |       |
|--------|--------|--------|--------|--------|-------|
| 6.198  | 6.530  | 6.599  | 6.489  | 6.487  | 3.734 |
| 4.433  | 4.914  | 4.979  | 4.577  | 4.668  | 3.878 |
| 5.039  | 5.348  | 4.989  | 5.022  | 5.315  | 4.439 |
| 7.594  | 8.099  | 7.843  | 7.947  | 7.879  | 6.261 |
| 6.215  | 6.136  | 6.120  | 6.416  | 6.203  | 4.000 |
| 6.256  | 6.143  | 6.446  | 6.484  | 6.220  | 4.360 |
| 6.461  | 7.086  | 6.873  | 7.202  | 7.467  | 9.124 |
| 6.479  | 6.478  | 6.248  | 6.202  | 6.418  | 7.165 |
| 5.642  | 5.081  | 5.019  | 5.971  | 5.551  | 6.342 |
| 3.233  | 3.649  | 2.979  | 2.912  | 3.413  | 3.225 |
| 8.165  | 7.672  | 6.990  | 7.538  | 7.931  | 8.352 |
| 2.694  | 2.614  | 3.197  | 4.255  | 3.100  | 4.690 |
| 5.468  | 5.792  | 5.320  | 5.622  | 5.764  | 6.527 |
| 5.382  | 6.174  | 6.176  | 5.193  | 5.762  | 5.787 |
| 3.669  | 4.200  | 3.623  | 3.488  | 3.696  | 3.864 |
| 3.529  | 3.796  | 3.865  | 3.799  | 3.560  | 6.308 |
| 7.234  | 7.553  | 7.265  | 7.265  | 7.376  | 6.584 |
| 4.673  | 5.141  | 4.603  | 4.610  | 4.541  | 5.414 |
| 5.928  | 5.399  | 5.529  | 6.105  | 5.725  | 6.396 |
| 5.060  | 5.124  | 5.594  | 5.270  | 5.319  | 6.101 |
| 3.163  | 4.138  | 4.449  | 3.174  | 4.140  | 2.826 |
| 4.417  | 4.604  | 3.807  | 3.927  | 4.541  | 4.881 |
| 3.449  | 3.655  | 4.050  | 3.714  | 3.840  | 2.828 |
| 5.034  | 4.941  | 5.366  | 4.834  | 5.063  | 3.576 |
| 10.263 | 10.316 | 10.351 | 10.215 | 10.249 | 9.593 |
| 4.063  | 3.254  | 3.774  | 3.337  | 3.388  | 2.632 |
| 4.513  | 4.904  | 5.087  | 4.533  | 5.038  | 4.935 |
| 5.741  | 6.231  | 5.638  | 5.611  | 5.800  | 3.468 |
| 4.005  | 3.859  | 4.245  | 4.034  | 4.319  | 2.918 |
| 4.925  | 4.428  | 4.378  | 4.214  | 4.479  | 5.407 |
| 4.721  | 4.598  | 5.038  | 4.575  | 4.544  | 2.520 |
| 3.456  | 2.650  | 3.485  | 3.050  | 2.781  | 2.157 |
| 9.504  | 9.495  | 9.788  | 9.373  | 9.676  | 8.161 |
| 4.316  | 4.822  | 4.771  | 4.480  | 4.584  | 3.362 |
| 3.509  | 3.318  | 2.257  | 3.469  | 3.377  | 3.303 |
| 5.687  | 5.206  | 5.717  | 5.202  | 5.425  | 5.502 |
| 6.104  | 6.546  | 6.303  | 6.373  | 6.471  | 6.067 |
| 2.367  | 2.860  | 2.744  | 1.651  | 2.599  | 1.843 |
| 6.050  | 6.381  | 6.367  | 5.949  | 6.090  | 4.992 |
| 4.839  | 5.088  | 5.256  | 5.131  | 4.896  | 4.385 |
| 5.959  | 6.061  | 6.172  | 6.143  | 6.106  | 5.484 |
| 3.205  | 3.192  | 4.065  | 3.219  | 3.865  | 3.049 |
| 3.174  | 3.346  | 1.732  | 3.239  | 3.421  | 1.853 |
| 2.632  | 2.986  | 3.244  | 3.480  | 3.229  | 3.367 |
| 2.349  | 2.099  | 1.747  | 1.516  | 1.928  | 2.216 |
| 4.611  | 2.549  | 4.572  | 4.136  | 4.326  | 2.135 |
| 5.684  | 5.110  | 4.892  | 5.881  | 5.839  | 5.858 |
| 5.400  | 4.926  | 4.638  | 5.724  | 5.543  | 5.616 |
| 5.191  | 4.990  | 5.024  | 4.915  | 4.634  | 2.653 |
| 3.585  | 3.138  | 3.138  | 3.373  | 2.239  | 1.500 |

|       |       |       |       |       |       |
|-------|-------|-------|-------|-------|-------|
| 7.252 | 7.021 | 6.601 | 7.612 | 7.419 | 6.857 |
| 7.329 | 7.139 | 6.663 | 7.661 | 7.298 | 7.101 |
| 2.989 | 3.370 | 3.506 | 3.345 | 3.278 | 3.944 |
| 2.383 | 2.680 | 1.676 | 3.269 | 3.066 | 3.630 |
| 2.469 | 2.779 | 1.567 | 3.411 | 3.175 | 3.505 |
| 4.737 | 5.093 | 4.665 | 5.597 | 5.107 | 5.805 |
| 5.690 | 5.916 | 5.387 | 6.183 | 5.754 | 6.896 |
| 5.320 | 5.137 | 4.966 | 5.536 | 5.408 | 6.402 |
| 5.579 | 5.337 | 5.164 | 5.806 | 5.547 | 6.488 |
| 3.628 | 4.081 | 3.469 | 3.113 | 3.505 | 4.150 |
| 7.973 | 7.461 | 7.766 | 7.959 | 7.817 | 8.515 |
| 6.597 | 6.588 | 6.781 | 6.830 | 6.414 | 6.195 |
| 7.930 | 7.995 | 7.935 | 7.889 | 7.855 | 7.155 |
| 3.939 | 3.719 | 3.956 | 3.740 | 3.883 | 3.869 |
| 9.160 | 9.408 | 9.291 | 9.434 | 9.561 | 8.150 |
| 8.223 | 8.664 | 8.497 | 8.426 | 8.306 | 7.564 |
| 5.542 | 5.146 | 5.111 | 5.520 | 5.183 | 5.425 |
| 6.242 | 6.353 | 6.346 | 6.458 | 6.346 | 6.156 |
| 5.976 | 5.856 | 5.671 | 5.780 | 5.868 | 4.997 |
| 5.548 | 5.837 | 5.615 | 5.640 | 5.694 | 5.788 |
| 3.989 | 4.108 | 4.458 | 3.679 | 4.168 | 3.128 |
| 2.310 | 2.363 | 1.853 | 2.084 | 1.866 | 2.361 |
| 2.427 | 2.273 | 2.585 | 1.900 | 2.886 | 2.371 |
| 5.223 | 4.771 | 5.075 | 4.905 | 4.919 | 5.461 |
| 5.596 | 5.780 | 5.984 | 6.050 | 5.789 | 5.691 |
| 5.890 | 5.113 | 4.980 | 5.329 | 5.526 | 6.126 |
| 6.424 | 6.925 | 6.565 | 6.963 | 7.168 | 7.080 |
| 2.597 | 3.249 | 3.200 | 3.184 | 3.726 | 5.484 |
| 7.312 | 7.612 | 7.493 | 7.316 | 7.337 | 7.073 |
| 9.194 | 9.049 | 9.100 | 9.271 | 9.220 | 7.961 |
| 3.895 | 4.471 | 3.958 | 4.455 | 4.941 | 6.586 |
| 4.615 | 5.209 | 4.714 | 5.401 | 5.423 | 4.138 |
| 4.439 | 4.281 | 5.407 | 3.513 | 3.683 | 4.335 |
| 2.278 | 2.692 | 2.632 | 3.198 | 3.250 | 3.424 |
| 3.687 | 3.522 | 3.428 | 3.641 | 3.650 | 4.354 |
| 6.076 | 6.304 | 6.501 | 6.414 | 6.310 | 5.432 |
| 5.260 | 5.216 | 5.980 | 5.594 | 5.870 | 3.881 |
| 3.338 | 3.625 | 3.343 | 3.626 | 3.789 | 2.930 |
| 6.144 | 5.998 | 5.572 | 6.462 | 5.473 | 6.957 |
| 3.555 | 2.781 | 3.242 | 2.869 | 2.479 | 2.740 |
| 2.012 | 1.934 | 2.148 | 2.434 | 2.097 | 2.177 |
| 2.093 | 2.947 | 3.028 | 2.964 | 2.630 | 2.534 |
| 5.785 | 6.339 | 6.315 | 6.039 | 6.252 | 5.825 |
| 1.647 | 1.972 | 2.307 | 2.236 | 2.262 | 2.516 |
| 2.974 | 3.247 | 2.079 | 2.532 | 2.603 | 2.049 |
| 2.667 | 2.354 | 2.676 | 2.823 | 2.869 | 2.294 |
| 3.371 | 4.152 | 3.823 | 3.460 | 3.688 | 2.066 |
| 4.366 | 4.113 | 4.013 | 4.173 | 3.431 | 2.070 |
| 7.080 | 7.429 | 7.315 | 7.073 | 7.097 | 5.916 |
| 8.451 | 8.637 | 8.440 | 8.240 | 8.690 | 8.168 |



|       |       |       |       |       |        |
|-------|-------|-------|-------|-------|--------|
| 7.137 | 6.574 | 6.857 | 6.707 | 6.645 | 4.515  |
| 3.084 | 1.974 | 2.331 | 3.412 | 2.614 | 3.653  |
| 3.512 | 3.888 | 3.595 | 3.412 | 3.089 | 1.849  |
| 3.887 | 3.363 | 4.396 | 4.129 | 4.065 | 3.216  |
| 5.967 | 6.443 | 6.402 | 6.166 | 6.192 | 5.283  |
| 5.771 | 5.805 | 5.037 | 4.167 | 4.625 | 4.744  |
| 2.814 | 2.987 | 3.229 | 2.754 | 3.351 | 3.134  |
| 7.161 | 6.345 | 6.666 | 6.572 | 6.467 | 4.719  |
| 6.706 | 6.597 | 7.174 | 6.728 | 6.586 | 1.237  |
| 5.951 | 5.733 | 5.920 | 4.420 | 5.486 | 4.779  |
| 4.982 | 4.008 | 3.603 | 3.400 | 4.587 | 3.035  |
| 3.559 | 4.804 | 5.369 | 4.206 | 4.617 | 6.540  |
| 6.810 | 7.619 | 7.047 | 8.154 | 8.297 | 9.702  |
| 6.551 | 6.047 | 6.289 | 6.634 | 7.123 | 7.675  |
| 5.550 | 4.097 | 4.170 | 4.961 | 5.056 | 4.515  |
| 3.113 | 3.660 | 3.379 | 3.368 | 2.663 | 1.988  |
| 4.144 | 3.635 | 4.661 | 3.699 | 4.018 | 3.424  |
| 7.858 | 7.969 | 7.748 | 7.472 | 7.667 | 7.751  |
| 3.994 | 3.960 | 4.136 | 3.609 | 3.543 | 3.107  |
| 4.346 | 3.749 | 4.054 | 4.123 | 4.037 | 2.354  |
| 2.379 | 2.859 | 2.175 | 2.991 | 3.298 | 4.123  |
| 5.436 | 5.456 | 5.306 | 5.029 | 5.497 | 2.800  |
| 3.611 | 3.289 | 3.899 | 2.955 | 4.191 | 4.201  |
| 6.247 | 4.971 | 5.121 | 5.363 | 5.606 | 3.028  |
| 4.416 | 5.027 | 5.418 | 4.933 | 4.812 | 3.464  |
| 4.170 | 3.971 | 4.077 | 4.008 | 4.000 | 5.095  |
| 6.674 | 6.247 | 6.214 | 6.867 | 6.119 | 3.116  |
| 6.723 | 6.650 | 6.653 | 6.639 | 6.920 | 5.854  |
| 5.205 | 5.072 | 5.400 | 5.419 | 5.441 | 4.161  |
| 2.448 | 1.746 | 1.652 | 2.169 | 2.812 | 1.862  |
| 9.231 | 9.093 | 9.181 | 9.629 | 9.586 | 10.439 |
| 5.390 | 5.191 | 5.146 | 5.041 | 5.251 | 3.764  |
| 5.890 | 6.301 | 6.249 | 6.247 | 6.341 | 7.119  |
| 3.103 | 2.871 | 3.111 | 2.128 | 2.381 | 2.850  |
| 5.150 | 5.469 | 6.002 | 5.511 | 5.360 | 5.735  |
| 4.420 | 4.313 | 4.478 | 4.307 | 4.192 | 4.727  |
| 3.949 | 3.949 | 4.015 | 4.300 | 4.084 | 2.103  |
| 1.817 | 2.028 | 2.488 | 1.487 | 1.873 | 1.723  |
| 7.279 | 7.377 | 7.351 | 7.333 | 7.297 | 5.974  |
| 5.237 | 4.866 | 4.555 | 5.603 | 5.105 | 6.216  |
| 2.484 | 2.377 | 2.497 | 1.214 | 1.844 | 1.719  |
| 4.097 | 4.609 | 4.314 | 4.164 | 4.051 | 3.168  |
| 5.085 | 4.419 | 4.175 | 4.759 | 4.022 | 3.184  |
| 3.052 | 3.872 | 2.827 | 3.905 | 3.641 | 3.928  |
| 5.452 | 4.710 | 5.711 | 5.741 | 6.210 | 6.501  |
| 4.366 | 5.013 | 5.154 | 4.533 | 4.794 | 3.619  |
| 2.453 | 2.088 | 3.537 | 3.004 | 2.540 | 1.946  |
| 2.187 | 1.362 | 2.117 | 1.715 | 2.511 | 2.267  |
| 6.735 | 6.557 | 6.703 | 6.628 | 6.492 | 5.313  |
| 8.416 | 7.995 | 8.275 | 8.317 | 8.417 | 6.557  |

|       |       |       |       |       |       |
|-------|-------|-------|-------|-------|-------|
| 7.733 | 7.842 | 7.702 | 7.750 | 7.754 | 6.150 |
| 7.663 | 7.431 | 7.699 | 7.519 | 7.817 | 7.270 |
| 5.114 | 4.281 | 4.976 | 4.466 | 4.783 | 5.120 |
| 6.216 | 5.771 | 6.158 | 6.133 | 6.102 | 4.670 |
| 7.472 | 6.722 | 7.149 | 7.261 | 7.026 | 5.747 |
| 5.375 | 6.054 | 5.934 | 5.599 | 6.084 | 5.698 |
| 6.526 | 6.582 | 6.704 | 6.533 | 6.562 | 5.495 |
| 9.115 | 8.641 | 8.864 | 8.770 | 8.725 | 6.702 |
| 7.894 | 8.124 | 7.724 | 7.793 | 7.935 | 5.768 |
| 8.555 | 8.729 | 8.625 | 8.204 | 8.535 | 4.985 |
| 5.477 | 5.824 | 5.838 | 5.260 | 5.643 | 4.944 |
| 5.180 | 4.944 | 5.253 | 5.232 | 5.050 | 4.529 |
| 3.403 | 3.861 | 3.066 | 3.201 | 4.351 | 3.001 |
| 6.734 | 6.778 | 6.902 | 6.928 | 6.859 | 6.336 |
| 6.402 | 5.944 | 6.322 | 5.689 | 5.982 | 4.837 |
| 3.546 | 3.308 | 4.236 | 3.262 | 3.278 | 1.563 |
| 8.075 | 8.018 | 8.236 | 8.246 | 8.461 | 8.739 |
| 8.484 | 8.044 | 8.510 | 8.314 | 8.257 | 5.152 |
| 4.646 | 3.985 | 4.175 | 4.278 | 4.053 | 3.339 |
| 2.850 | 3.365 | 3.596 | 2.762 | 3.530 | 2.126 |
| 6.685 | 6.221 | 6.412 | 6.137 | 6.263 | 7.039 |
| 5.872 | 6.510 | 6.244 | 5.803 | 6.344 | 4.421 |
| 4.270 | 4.017 | 4.676 | 4.365 | 4.965 | 3.501 |
| 1.370 | 1.563 | 1.790 | 1.489 | 2.120 | 2.019 |
| 3.483 | 3.307 | 3.335 | 3.950 | 3.091 | 2.955 |
| 2.645 | 4.057 | 2.760 | 3.423 | 3.290 | 3.598 |
| 3.261 | 2.124 | 2.310 | 3.433 | 2.340 | 2.042 |
| 2.206 | 2.970 | 2.986 | 2.343 | 3.214 | 1.650 |
| 2.360 | 2.638 | 2.635 | 2.355 | 2.990 | 2.781 |
| 6.955 | 7.038 | 7.122 | 6.967 | 6.881 | 5.491 |
| 4.811 | 4.811 | 5.312 | 4.790 | 5.014 | 4.487 |
| 5.238 | 4.869 | 4.883 | 5.053 | 5.449 | 7.127 |
| 3.766 | 4.201 | 4.500 | 4.175 | 3.935 | 2.867 |
| 7.039 | 7.021 | 7.122 | 7.272 | 6.794 | 6.228 |
| 5.143 | 4.391 | 4.437 | 5.014 | 4.721 | 5.989 |
| 1.799 | 1.575 | 2.552 | 1.911 | 2.073 | 2.979 |
| 5.904 | 6.053 | 6.115 | 5.240 | 5.787 | 5.160 |
| 4.326 | 4.979 | 4.017 | 4.242 | 4.401 | 4.494 |
| 6.778 | 5.181 | 5.906 | 6.112 | 5.500 | 7.183 |
| 4.719 | 5.138 | 5.819 | 2.295 | 4.927 | 4.501 |
| 3.541 | 6.180 | 6.207 | 6.993 | 6.076 | 4.934 |
| 3.493 | 5.209 | 5.409 | 6.722 | 5.965 | 4.794 |
| 6.352 | 5.725 | 6.135 | 6.007 | 6.293 | 5.514 |
| 5.500 | 5.939 | 5.976 | 6.110 | 5.855 | 6.634 |
| 4.153 | 4.163 | 4.341 | 4.752 | 4.674 | 5.348 |
| 5.859 | 6.361 | 6.045 | 6.204 | 6.206 | 6.086 |
| 5.877 | 6.325 | 6.325 | 5.969 | 6.129 | 5.432 |
| 3.311 | 3.801 | 3.824 | 3.677 | 3.704 | 3.622 |
| 2.008 | 3.180 | 2.862 | 2.730 | 2.602 | 2.678 |
| 6.754 | 7.207 | 6.823 | 6.773 | 7.092 | 4.776 |

|       |       |       |       |       |       |
|-------|-------|-------|-------|-------|-------|
| 7.193 | 6.942 | 7.071 | 6.861 | 6.903 | 6.275 |
| 9.349 | 9.454 | 9.572 | 9.389 | 9.549 | 7.633 |
| 6.257 | 6.461 | 6.601 | 6.571 | 6.512 | 5.966 |
| 4.812 | 4.811 | 5.311 | 5.153 | 5.099 | 3.093 |
| 4.622 | 4.312 | 4.177 | 4.598 | 4.081 | 4.914 |
| 4.937 | 5.355 | 5.253 | 6.090 | 4.693 | 5.815 |
| 1.658 | 0.896 | 1.088 | 2.320 | 1.451 | 2.571 |
| 3.923 | 3.378 | 3.117 | 4.560 | 3.799 | 5.282 |
| 4.592 | 5.049 | 3.952 | 5.580 | 4.237 | 5.557 |
| 6.963 | 7.084 | 6.780 | 7.806 | 7.025 | 8.492 |
| 6.610 | 6.627 | 6.401 | 7.269 | 6.590 | 8.138 |
| 5.527 | 4.303 | 3.840 | 5.002 | 4.901 | 4.823 |
| 4.756 | 4.121 | 4.560 | 4.474 | 4.684 | 3.403 |
| 8.118 | 8.001 | 7.598 | 8.839 | 7.893 | 9.456 |
| 3.298 | 2.540 | 3.293 | 2.218 | 2.515 | 2.682 |
| 5.120 | 5.192 | 4.747 | 4.880 | 4.438 | 5.935 |
| 3.244 | 3.832 | 4.287 | 3.661 | 3.683 | 6.590 |
| 2.079 | 1.700 | 2.070 | 1.902 | 1.441 | 2.167 |
| 4.721 | 4.675 | 4.848 | 3.992 | 4.625 | 5.269 |
| 2.802 | 3.362 | 3.286 | 3.030 | 2.925 | 2.672 |
| 3.671 | 4.676 | 3.882 | 3.740 | 3.302 | 4.358 |
| 5.441 | 5.260 | 5.311 | 5.113 | 5.192 | 5.389 |
| 5.155 | 5.664 | 5.450 | 5.134 | 5.273 | 4.247 |
| 8.331 | 8.487 | 8.215 | 8.482 | 8.585 | 9.517 |
| 2.197 | 3.050 | 3.017 | 3.356 | 3.181 | 3.422 |
| 2.090 | 1.701 | 2.669 | 2.161 | 2.890 | 2.981 |
| 6.421 | 6.712 | 6.635 | 6.561 | 6.503 | 6.068 |
| 6.921 | 6.795 | 6.580 | 6.748 | 6.840 | 7.752 |
| 2.002 | 1.966 | 1.877 | 1.861 | 1.890 | 3.323 |
| 7.655 | 7.504 | 7.135 | 5.975 | 6.707 | 6.333 |
| 3.991 | 5.079 | 4.793 | 3.838 | 4.498 | 3.266 |
| 5.095 | 5.282 | 5.281 | 5.736 | 5.962 | 8.639 |
| 6.646 | 6.430 | 6.403 | 6.143 | 6.611 | 3.840 |
| 2.653 | 3.375 | 2.653 | 3.013 | 3.007 | 2.472 |
| 3.605 | 2.768 | 3.993 | 3.548 | 3.650 | 2.591 |
| 3.616 | 3.991 | 3.725 | 4.028 | 3.733 | 3.805 |
| 3.097 | 2.779 | 3.265 | 2.383 | 3.176 | 3.168 |
| 3.483 | 4.185 | 3.704 | 3.390 | 3.687 | 3.884 |
| 3.921 | 5.108 | 5.102 | 4.365 | 4.514 | 5.511 |
| 1.852 | 2.238 | 1.915 | 2.079 | 0.646 | 1.879 |
| 4.629 | 4.397 | 4.149 | 3.745 | 4.183 | 5.001 |
| 2.842 | 1.673 | 1.793 | 1.843 | 1.511 | 2.345 |
| 3.356 | 3.088 | 3.094 | 2.589 | 2.310 | 2.064 |
| 2.910 | 2.827 | 2.682 | 2.659 | 2.500 | 3.284 |
| 6.410 | 6.757 | 6.804 | 6.467 | 6.364 | 4.771 |
| 4.250 | 4.372 | 4.263 | 4.261 | 4.154 | 3.419 |
| 4.032 | 4.245 | 3.919 | 4.939 | 4.835 | 4.711 |
| 2.181 | 1.512 | 2.078 | 1.881 | 2.082 | 2.510 |
| 1.659 | 2.124 | 1.826 | 1.924 | 1.405 | 3.734 |
| 2.006 | 1.849 | 2.062 | 2.163 | 1.831 | 3.940 |

|       |       |       |       |       |       |
|-------|-------|-------|-------|-------|-------|
| 2.067 | 2.037 | 2.272 | 2.251 | 1.919 | 3.966 |
| 2.145 | 3.479 | 3.592 | 3.312 | 3.059 | 4.030 |
| 3.120 | 2.639 | 2.396 | 3.440 | 3.597 | 3.434 |
| 3.184 | 2.647 | 2.590 | 3.714 | 3.506 | 3.607 |
| 4.519 | 4.715 | 4.715 | 3.990 | 4.455 | 5.309 |
| 5.327 | 5.111 | 5.143 | 4.658 | 4.997 | 5.781 |
| 9.170 | 9.354 | 9.284 | 8.971 | 9.515 | 5.715 |
| 3.934 | 4.203 | 4.388 | 3.743 | 3.731 | 3.673 |
| 3.792 | 3.331 | 4.923 | 4.321 | 3.767 | 2.768 |
| 3.280 | 3.988 | 3.969 | 3.652 | 4.248 | 3.434 |
| 2.376 | 3.659 | 3.854 | 3.507 | 4.000 | 3.099 |
| 3.467 | 4.364 | 4.658 | 3.802 | 4.463 | 3.725 |
| 3.508 | 3.093 | 3.631 | 2.982 | 3.555 | 2.922 |
| 3.387 | 4.014 | 4.292 | 3.284 | 3.546 | 4.432 |
| 4.775 | 4.810 | 4.780 | 5.091 | 4.651 | 5.773 |
| 3.814 | 3.779 | 3.833 | 3.503 | 3.544 | 4.003 |
| 4.919 | 5.032 | 5.066 | 5.319 | 5.147 | 4.540 |
| 8.149 | 8.337 | 8.266 | 8.356 | 8.520 | 7.356 |
| 5.960 | 5.958 | 5.849 | 6.253 | 5.982 | 6.912 |
| 4.170 | 4.572 | 4.473 | 4.142 | 4.225 | 4.291 |
| 5.474 | 5.420 | 5.580 | 5.504 | 5.407 | 4.158 |
| 6.782 | 6.749 | 6.752 | 7.023 | 6.801 | 4.191 |
| 3.827 | 3.144 | 3.109 | 4.790 | 3.161 | 2.136 |
| 7.086 | 6.957 | 7.224 | 7.243 | 7.298 | 6.526 |
| 7.699 | 7.025 | 6.648 | 7.494 | 7.589 | 8.587 |
| 2.617 | 2.087 | 2.967 | 2.637 | 2.419 | 2.491 |
| 2.037 | 1.755 | 2.201 | 2.141 | 1.788 | 2.051 |
| 2.386 | 2.364 | 1.700 | 1.837 | 1.609 | 1.684 |
| 4.725 | 5.364 | 5.344 | 5.198 | 4.961 | 4.319 |
| 6.714 | 5.961 | 6.195 | 6.647 | 6.575 | 8.096 |
| 3.707 | 3.859 | 3.446 | 3.423 | 3.262 | 5.015 |
| 8.153 | 8.243 | 8.123 | 8.244 | 8.076 | 7.352 |
| 3.250 | 4.160 | 4.187 | 4.834 | 4.490 | 5.459 |
| 3.115 | 2.747 | 3.048 | 3.273 | 3.423 | 3.938 |
| 6.419 | 6.776 | 6.682 | 6.685 | 7.312 | 5.542 |
| 7.099 | 7.158 | 7.173 | 6.603 | 6.731 | 6.670 |
| 5.085 | 4.962 | 4.827 | 4.960 | 5.246 | 4.771 |
| 3.078 | 3.594 | 3.271 | 3.115 | 3.817 | 3.083 |
| 6.124 | 5.771 | 6.158 | 6.242 | 5.772 | 5.477 |
| 4.401 | 4.903 | 4.568 | 3.939 | 4.436 | 4.073 |
| 4.989 | 4.910 | 4.706 | 4.983 | 4.753 | 6.867 |
| 2.342 | 2.770 | 2.267 | 2.276 | 2.425 | 3.662 |
| 2.329 | 2.346 | 2.756 | 2.153 | 2.162 | 2.728 |
| 4.930 | 5.749 | 5.822 | 4.792 | 4.250 | 3.007 |
| 5.623 | 5.206 | 5.982 | 6.055 | 6.525 | 7.838 |
| 4.369 | 4.993 | 4.654 | 5.730 | 5.727 | 6.339 |
| 3.096 | 3.639 | 3.312 | 3.592 | 2.909 | 4.149 |
| 4.675 | 4.834 | 4.578 | 4.733 | 4.402 | 3.738 |
| 4.582 | 3.823 | 4.067 | 4.530 | 4.142 | 5.528 |
| 5.685 | 5.118 | 5.538 | 5.833 | 5.683 | 5.486 |

|       |       |       |       |       |        |
|-------|-------|-------|-------|-------|--------|
| 8.781 | 8.989 | 8.475 | 8.467 | 8.640 | 8.851  |
| 2.568 | 3.235 | 2.891 | 2.503 | 2.758 | 2.287  |
| 1.813 | 1.734 | 2.801 | 2.690 | 3.088 | 1.930  |
| 4.766 | 3.825 | 3.767 | 4.796 | 3.872 | 4.723  |
| 3.609 | 3.715 | 4.580 | 4.282 | 3.858 | 4.192  |
| 6.849 | 5.775 | 6.775 | 5.576 | 6.369 | 6.244  |
| 6.001 | 5.730 | 5.519 | 6.343 | 6.071 | 7.497  |
| 5.383 | 4.725 | 4.727 | 5.563 | 5.326 | 6.561  |
| 1.886 | 2.275 | 2.933 | 2.575 | 2.923 | 2.926  |
| 8.960 | 8.867 | 9.058 | 9.378 | 9.529 | 10.293 |
| 6.049 | 5.530 | 6.126 | 6.058 | 6.254 | 5.940  |
| 4.977 | 5.169 | 5.513 | 5.030 | 4.381 | 4.579  |
| 7.852 | 8.268 | 8.277 | 7.853 | 8.204 | 7.915  |
| 5.595 | 5.459 | 5.949 | 5.996 | 5.299 | 6.526  |
| 4.243 | 5.011 | 4.907 | 4.616 | 4.857 | 3.694  |
| 1.659 | 1.431 | 2.015 | 2.224 | 2.156 | 3.025  |
| 4.266 | 4.759 | 4.835 | 4.232 | 4.076 | 3.777  |
| 1.828 | 1.825 | 1.844 | 2.177 | 2.761 | 1.455  |
| 3.858 | 3.519 | 4.403 | 3.636 | 3.592 | 3.448  |
| 2.596 | 3.239 | 4.209 | 2.744 | 3.758 | 3.588  |
| 2.738 | 3.509 | 3.131 | 2.956 | 3.981 | 3.392  |
| 4.097 | 4.624 | 4.525 | 3.676 | 4.246 | 4.352  |
| 1.984 | 1.797 | 2.879 | 2.267 | 2.283 | 2.397  |
| 6.027 | 5.647 | 6.161 | 5.373 | 5.582 | 5.904  |
| 4.177 | 3.349 | 5.142 | 4.927 | 4.592 | 3.919  |
| 2.716 | 3.173 | 2.809 | 2.846 | 2.249 | 2.149  |
| 1.914 | 1.730 | 2.522 | 2.004 | 1.900 | 2.132  |
| 4.709 | 4.393 | 4.245 | 4.725 | 3.574 | 3.570  |
| 1.241 | 1.962 | 2.485 | 1.653 | 2.244 | 1.357  |
| 2.899 | 4.523 | 2.831 | 3.617 | 3.833 | 3.678  |
| 3.342 | 3.781 | 4.351 | 2.771 | 1.425 | 3.210  |
| 3.961 | 2.804 | 3.499 | 3.090 | 2.952 | 3.606  |
| 5.241 | 6.123 | 5.991 | 5.750 | 5.112 | 5.393  |
| 3.349 | 3.450 | 3.946 | 3.365 | 3.618 | 3.605  |
| 9.483 | 9.498 | 9.800 | 9.715 | 9.180 | 8.575  |
| 2.121 | 2.707 | 2.805 | 2.229 | 2.897 | 3.002  |
| 7.134 | 6.913 | 7.132 | 6.603 | 6.815 | 7.663  |
| 9.074 | 8.935 | 9.334 | 9.094 | 9.189 | 9.938  |
| 6.156 | 6.037 | 6.140 | 6.082 | 6.343 | 6.556  |
| 5.035 | 4.688 | 4.885 | 4.798 | 4.771 | 5.266  |
| 4.312 | 3.880 | 4.395 | 4.471 | 4.481 | 5.186  |
| 3.794 | 4.075 | 3.953 | 3.471 | 3.892 | 3.853  |
| 4.503 | 6.128 | 5.335 | 4.342 | 4.405 | 4.543  |
| 3.664 | 3.843 | 4.253 | 3.753 | 3.167 | 4.151  |
| 5.197 | 5.300 | 6.013 | 5.124 | 5.339 | 5.282  |
| 3.515 | 4.134 | 4.699 | 4.031 | 4.130 | 4.210  |
| 5.532 | 5.281 | 5.494 | 5.851 | 5.678 | 4.985  |
| 9.013 | 9.256 | 9.084 | 9.111 | 9.072 | 7.513  |
| 7.476 | 7.645 | 7.502 | 7.486 | 7.478 | 6.247  |
| 3.606 | 3.722 | 4.206 | 3.666 | 3.517 | 5.050  |

|       |       |       |       |       |       |
|-------|-------|-------|-------|-------|-------|
| 3.633 | 4.632 | 4.264 | 4.076 | 4.989 | 4.101 |
| 4.854 | 5.027 | 5.097 | 4.383 | 5.229 | 5.095 |
| 6.944 | 7.341 | 6.759 | 5.937 | 7.146 | 6.862 |
| 7.147 | 7.110 | 7.199 | 6.370 | 6.872 | 6.963 |
| 3.947 | 4.326 | 4.726 | 3.826 | 4.140 | 4.539 |
| 4.424 | 7.237 | 6.489 | 5.894 | 6.274 | 6.746 |
| 8.236 | 8.665 | 8.336 | 7.633 | 8.582 | 8.171 |
| 6.800 | 7.186 | 7.258 | 6.469 | 7.007 | 6.663 |
| 7.952 | 8.334 | 8.352 | 7.616 | 8.179 | 7.928 |
| 7.914 | 8.408 | 8.363 | 7.625 | 8.125 | 7.898 |
| 4.269 | 5.084 | 5.121 | 4.278 | 4.803 | 5.152 |
| 6.687 | 7.533 | 7.642 | 6.969 | 7.524 | 7.626 |
| 6.331 | 7.180 | 7.287 | 6.635 | 7.188 | 7.178 |
| 6.977 | 6.717 | 7.082 | 6.699 | 7.257 | 6.646 |
| 6.260 | 7.020 | 7.103 | 6.517 | 7.002 | 7.035 |
| 7.054 | 6.739 | 7.199 | 6.577 | 7.150 | 6.722 |
| 4.901 | 4.530 | 4.869 | 4.597 | 4.582 | 5.705 |
| 4.704 | 4.400 | 4.696 | 4.466 | 4.197 | 5.403 |
| 4.886 | 4.582 | 4.854 | 4.577 | 4.564 | 5.599 |
| 4.363 | 4.658 | 5.114 | 4.815 | 4.332 | 5.735 |
| 4.341 | 4.724 | 5.159 | 4.705 | 4.392 | 5.663 |
| 4.360 | 4.923 | 5.122 | 4.503 | 4.376 | 5.784 |
| 4.366 | 4.972 | 5.157 | 4.500 | 4.501 | 5.792 |
| 3.956 | 4.987 | 4.889 | 3.937 | 3.955 | 5.535 |
| 3.996 | 4.996 | 4.878 | 3.912 | 4.107 | 5.524 |
| 3.263 | 4.254 | 4.160 | 3.211 | 3.336 | 4.661 |
| 3.796 | 4.108 | 4.576 | 3.887 | 3.836 | 5.401 |
| 3.445 | 3.668 | 4.154 | 3.463 | 3.421 | 4.900 |
| 2.180 | 2.260 | 2.770 | 2.167 | 2.020 | 3.502 |
| 3.404 | 3.738 | 4.108 | 3.475 | 3.345 | 4.908 |
| 2.271 | 2.382 | 2.862 | 2.298 | 2.006 | 3.500 |
| 4.083 | 4.536 | 4.687 | 3.723 | 3.696 | 4.980 |
| 4.141 | 4.402 | 4.696 | 3.656 | 3.737 | 4.987 |
| 3.240 | 3.482 | 3.631 | 2.687 | 3.050 | 4.124 |
| 4.360 | 4.678 | 4.856 | 3.904 | 3.835 | 5.219 |
| 3.119 | 3.374 | 3.633 | 2.642 | 2.632 | 3.997 |
| 6.585 | 7.166 | 6.666 | 6.032 | 6.046 | 7.566 |
| 4.548 | 5.294 | 4.738 | 4.152 | 4.119 | 5.491 |
| 5.855 | 6.498 | 5.824 | 5.385 | 5.481 | 6.693 |
| 5.800 | 6.514 | 5.883 | 5.348 | 5.379 | 6.661 |
| 3.124 | 3.670 | 4.458 | 2.994 | 2.594 | 3.670 |
| 1.291 | 1.927 | 2.018 | 1.482 | 1.765 | 2.601 |
| 1.552 | 1.733 | 2.201 | 1.393 | 1.863 | 2.212 |
| 1.634 | 1.983 | 2.491 | 1.478 | 1.842 | 2.543 |
| 4.211 | 4.701 | 4.909 | 3.878 | 3.957 | 5.194 |
| 5.012 | 5.002 | 5.069 | 4.950 | 4.636 | 4.584 |
| 4.430 | 4.085 | 4.204 | 4.232 | 3.805 | 4.027 |
| 3.180 | 3.600 | 3.539 | 2.677 | 3.122 | 3.364 |
| 3.822 | 4.076 | 4.175 | 3.310 | 3.820 | 3.894 |
| 4.439 | 4.708 | 4.814 | 3.928 | 4.320 | 4.535 |

|       |       |       |       |       |       |
|-------|-------|-------|-------|-------|-------|
| 3.914 | 4.030 | 4.209 | 3.208 | 3.722 | 3.931 |
| 4.013 | 4.337 | 4.349 | 3.558 | 3.857 | 4.030 |
| 4.024 | 4.197 | 4.393 | 3.402 | 3.944 | 4.200 |
| 4.668 | 4.847 | 5.209 | 4.152 | 4.547 | 4.894 |
| 3.918 | 4.690 | 4.574 | 3.631 | 3.913 | 4.226 |
| 3.371 | 2.903 | 3.020 | 2.939 | 3.508 | 3.938 |
| 2.834 | 2.945 | 2.399 | 2.716 | 2.616 | 2.328 |
| 2.709 | 2.606 | 2.206 | 2.580 | 2.342 | 2.406 |
| 2.345 | 2.940 | 1.903 | 2.218 | 2.194 | 1.707 |
| 2.341 | 2.940 | 1.863 | 2.184 | 2.154 | 1.702 |
| 2.358 | 2.587 | 2.356 | 2.094 | 1.751 | 1.776 |
| 7.541 | 8.271 | 7.356 | 5.868 | 5.497 | 7.255 |
| 8.202 | 8.960 | 8.912 | 7.790 | 7.740 | 9.305 |
| 8.348 | 8.997 | 8.840 | 7.822 | 7.783 | 9.328 |
| 7.990 | 8.628 | 8.551 | 7.399 | 7.545 | 8.900 |
| 8.261 | 8.842 | 8.690 | 7.691 | 7.651 | 9.116 |
| 7.046 | 7.210 | 7.034 | 1.055 | 1.252 | 1.639 |
| 3.313 | 3.937 | 3.622 | 3.096 | 3.550 | 3.549 |
| 3.337 | 3.963 | 3.592 | 3.345 | 3.696 | 3.516 |
| 6.774 | 6.635 | 6.618 | 5.691 | 6.112 | 6.377 |
| 4.455 | 2.558 | 2.764 | 2.839 | 3.861 | 1.909 |
| 5.863 | 5.733 | 5.682 | 4.863 | 5.354 | 5.572 |
| 7.789 | 7.511 | 7.311 | 6.213 | 6.882 | 7.343 |
| 6.135 | 6.718 | 6.833 | 5.235 | 5.377 | 6.774 |
| 4.722 | 4.593 | 5.104 | 5.315 | 5.256 | 5.628 |
| 7.131 | 7.311 | 6.944 | 0.970 | 0.946 | 1.565 |
| 2.191 | 1.791 | 2.376 | 2.219 | 2.362 | 2.508 |
| 8.232 | 8.286 | 8.103 | 7.709 | 8.008 | 8.094 |
| 8.254 | 8.339 | 8.133 | 7.744 | 8.049 | 8.225 |
| 4.958 | 5.131 | 5.238 | 4.690 | 5.134 | 4.971 |
| 4.363 | 4.934 | 4.612 | 4.198 | 4.729 | 4.517 |
| 4.685 | 4.839 | 4.776 | 4.467 | 4.767 | 4.706 |
| 4.346 | 4.902 | 4.866 | 4.370 | 4.751 | 4.575 |
| 3.648 | 3.460 | 3.529 | 3.386 | 3.616 | 3.921 |
| 3.318 | 3.373 | 3.400 | 3.400 | 3.554 | 3.500 |
| 3.085 | 3.088 | 3.271 | 3.112 | 3.274 | 3.215 |
| 4.095 | 5.053 | 4.852 | 5.418 | 5.499 | 5.070 |
| 9.212 | 8.797 | 8.779 | 8.740 | 8.665 | 5.997 |
| 2.912 | 2.048 | 2.237 | 2.181 | 2.028 | 2.769 |
| 1.846 | 2.650 | 2.295 | 2.135 | 2.129 | 3.322 |
| 6.464 | 6.545 | 6.102 | 6.376 | 6.699 | 5.545 |
| 3.334 | 3.691 | 3.681 | 2.950 | 3.243 | 4.062 |
| 6.324 | 6.385 | 6.127 | 6.286 | 6.237 | 5.613 |
| 3.030 | 2.637 | 2.876 | 2.474 | 2.721 | 3.374 |
| 3.690 | 4.405 | 4.198 | 3.898 | 4.302 | 4.862 |
| 7.598 | 8.020 | 7.667 | 7.603 | 7.456 | 7.096 |
| 6.486 | 7.404 | 6.806 | 6.585 | 6.815 | 6.524 |
| 3.451 | 3.036 | 3.944 | 4.334 | 3.729 | 4.733 |
| 3.182 | 2.479 | 2.892 | 2.952 | 2.789 | 3.740 |
| 3.783 | 4.605 | 3.894 | 4.185 | 4.152 | 4.754 |

|       |       |       |       |       |       |
|-------|-------|-------|-------|-------|-------|
| 4.184 | 4.142 | 3.686 | 3.444 | 3.635 | 4.587 |
| 4.134 | 4.262 | 4.962 | 4.178 | 4.816 | 4.657 |
| 4.950 | 4.660 | 4.889 | 4.770 | 4.605 | 3.575 |
| 2.471 | 2.802 | 2.735 | 2.456 | 2.899 | 4.211 |
| 2.585 | 2.309 | 1.963 | 2.070 | 3.105 | 3.088 |
| 5.472 | 5.805 | 6.029 | 6.059 | 5.823 | 5.078 |
| 4.049 | 4.474 | 4.262 | 4.100 | 4.712 | 7.008 |
| 3.734 | 3.749 | 4.098 | 3.951 | 4.163 | 4.854 |
| 2.859 | 3.719 | 3.468 | 3.905 | 4.172 | 3.570 |
| 4.613 | 5.020 | 4.799 | 4.983 | 4.841 | 4.032 |
| 6.447 | 5.952 | 5.852 | 6.358 | 6.246 | 6.625 |
| 1.892 | 1.913 | 1.924 | 1.558 | 2.325 | 2.529 |
| 7.584 | 7.668 | 7.849 | 7.333 | 7.542 | 5.293 |
| 4.036 | 3.891 | 3.351 | 3.914 | 4.221 | 5.021 |
| 6.004 | 6.067 | 6.125 | 5.808 | 5.702 | 1.569 |
| 1.760 | 2.175 | 2.086 | 1.411 | 2.028 | 4.507 |
| 1.551 | 1.863 | 1.614 | 1.597 | 1.598 | 3.192 |
| 1.675 | 2.135 | 2.118 | 1.698 | 1.767 | 2.137 |
| 2.283 | 2.562 | 2.073 | 1.779 | 2.342 | 2.364 |
| 1.143 | 1.247 | 1.751 | 1.127 | 1.325 | 5.846 |
| 1.836 | 1.762 | 1.703 | 1.521 | 1.904 | 5.143 |
| 1.947 | 2.418 | 1.589 | 1.957 | 2.196 | 6.748 |
| 2.495 | 2.734 | 2.516 | 2.968 | 2.767 | 4.177 |
| 2.386 | 2.466 | 2.789 | 2.151 | 2.229 | 3.368 |
| 2.093 | 1.873 | 2.866 | 2.144 | 2.185 | 4.976 |
| 1.963 | 1.378 | 1.790 | 1.593 | 1.450 | 3.419 |
| 1.799 | 2.100 | 2.250 | 2.181 | 2.803 | 3.758 |
| 1.487 | 1.589 | 1.699 | 1.125 | 1.286 | 4.331 |
| 2.471 | 1.984 | 2.513 | 1.957 | 1.978 | 3.148 |
| 1.631 | 1.792 | 1.433 | 1.467 | 1.287 | 2.437 |
| 2.379 | 2.242 | 1.476 | 2.224 | 2.558 | 2.707 |
| 2.056 | 2.879 | 2.674 | 2.886 | 3.032 | 2.366 |
| 1.700 | 1.736 | 2.142 | 1.450 | 1.491 | 3.796 |
| 2.188 | 2.383 | 2.220 | 2.558 | 2.933 | 2.255 |
| 1.410 | 1.531 | 1.513 | 1.344 | 1.412 | 2.349 |
| 2.544 | 2.274 | 2.644 | 2.022 | 2.618 | 1.916 |
| 1.566 | 1.315 | 1.334 | 1.551 | 1.426 | 0.967 |
| 1.445 | 1.249 | 0.886 | 1.046 | 1.071 | 1.252 |
| 1.980 | 2.827 | 2.492 | 2.895 | 2.764 | 3.162 |
| 1.741 | 2.274 | 1.898 | 2.283 | 3.002 | 4.503 |
| 2.470 | 1.937 | 2.515 | 2.083 | 2.410 | 1.905 |
| 1.680 | 1.897 | 1.819 | 1.560 | 1.611 | 4.550 |
| 1.748 | 2.482 | 1.989 | 1.995 | 2.413 | 4.618 |
| 2.577 | 2.447 | 2.895 | 2.812 | 2.127 | 4.867 |
| 2.107 | 1.758 | 2.059 | 1.429 | 2.069 | 3.097 |
| 2.224 | 1.222 | 1.703 | 1.457 | 1.787 | 1.213 |
| 3.880 | 3.366 | 3.772 | 4.052 | 3.705 | 3.366 |
| 7.416 | 7.231 | 7.530 | 7.529 | 7.251 | 5.830 |
| 1.768 | 1.654 | 1.592 | 1.375 | 1.520 | 2.118 |
| 2.827 | 3.544 | 3.595 | 2.392 | 2.852 | 4.707 |



|        |       |        |       |       |        |
|--------|-------|--------|-------|-------|--------|
| 3.020  | 2.869 | 3.313  | 2.856 | 3.543 | 3.904  |
| 2.473  | 3.448 | 2.839  | 3.054 | 2.794 | 2.676  |
| 7.082  | 7.184 | 7.163  | 7.263 | 7.085 | 5.369  |
| 6.622  | 6.852 | 7.094  | 6.699 | 6.805 | 7.294  |
| 5.289  | 5.093 | 5.173  | 5.776 | 5.401 | 5.920  |
| 2.438  | 1.732 | 2.913  | 2.284 | 2.111 | 2.478  |
| 2.706  | 2.861 | 3.051  | 2.704 | 3.287 | 3.273  |
| 4.092  | 4.034 | 4.164  | 4.742 | 4.921 | 6.130  |
| 3.655  | 3.302 | 3.656  | 4.064 | 3.664 | 4.097  |
| 3.798  | 4.073 | 3.810  | 3.491 | 3.603 | 3.623  |
| 4.938  | 4.797 | 5.480  | 4.338 | 5.296 | 5.923  |
| 4.699  | 4.888 | 4.701  | 4.663 | 4.454 | 3.048  |
| 6.091  | 5.557 | 5.849  | 5.403 | 6.054 | 4.494  |
| 3.482  | 3.008 | 2.873  | 2.725 | 2.424 | 2.268  |
| 6.423  | 6.615 | 6.852  | 6.519 | 6.535 | 6.084  |
| 4.177  | 4.523 | 4.653  | 4.770 | 4.761 | 2.765  |
| 3.377  | 2.300 | 3.173  | 1.374 | 3.486 | 2.433  |
| 2.991  | 3.404 | 2.363  | 3.004 | 3.246 | 2.436  |
| 5.132  | 4.680 | 5.165  | 5.189 | 5.451 | 6.203  |
| 4.289  | 3.995 | 3.940  | 3.977 | 3.879 | 3.725  |
| 3.606  | 3.711 | 4.044  | 3.050 | 3.828 | 2.619  |
| 8.267  | 8.272 | 8.099  | 7.704 | 7.882 | 5.752  |
| 4.744  | 5.032 | 4.093  | 5.226 | 4.973 | 4.228  |
| 5.979  | 5.779 | 5.903  | 5.647 | 6.023 | 4.611  |
| 3.876  | 2.936 | 2.955  | 2.863 | 2.252 | 2.752  |
| 3.448  | 3.111 | 3.200  | 4.099 | 2.621 | 3.571  |
| 5.724  | 5.337 | 5.857  | 5.502 | 5.279 | 4.650  |
| 4.090  | 4.717 | 4.621  | 4.475 | 4.421 | 5.558  |
| 2.966  | 3.025 | 2.527  | 2.959 | 1.948 | 2.883  |
| 4.470  | 4.197 | 4.558  | 4.430 | 4.692 | 4.692  |
| 3.750  | 3.328 | 3.435  | 3.422 | 4.280 | 3.502  |
| 1.850  | 2.842 | 2.494  | 2.597 | 2.857 | 3.802  |
| 3.531  | 3.103 | 3.525  | 3.915 | 4.029 | 3.324  |
| 5.504  | 5.191 | 5.021  | 4.639 | 5.446 | 5.393  |
| 2.687  | 3.094 | 3.443  | 2.726 | 3.204 | 4.244  |
| 2.969  | 3.734 | 3.520  | 2.973 | 3.812 | 3.552  |
| 7.722  | 8.000 | 7.931  | 7.685 | 7.881 | 6.909  |
| 5.529  | 6.192 | 5.652  | 6.008 | 5.878 | 4.861  |
| 4.769  | 3.926 | 4.295  | 4.292 | 3.680 | 3.527  |
| 4.936  | 4.685 | 4.392  | 4.322 | 4.538 | 3.064  |
| 5.565  | 5.483 | 4.881  | 4.800 | 5.578 | 4.866  |
| 5.991  | 6.326 | 6.297  | 5.564 | 5.233 | 5.658  |
| 2.302  | 2.278 | 2.893  | 2.267 | 2.149 | 4.194  |
| 8.153  | 8.022 | 7.994  | 8.106 | 8.237 | 6.925  |
| 2.639  | 3.260 | 2.424  | 2.738 | 3.252 | 1.816  |
| 3.221  | 3.483 | 3.430  | 3.097 | 3.030 | 2.288  |
| 4.510  | 5.018 | 5.098  | 4.999 | 4.873 | 4.420  |
| 10.623 | 9.735 | 10.333 | 9.439 | 9.726 | 10.691 |
| 10.706 | 9.808 | 10.417 | 9.576 | 9.815 | 10.731 |
| 10.262 | 9.199 | 9.789  | 9.020 | 9.269 | 10.111 |

|        |       |        |       |       |        |
|--------|-------|--------|-------|-------|--------|
| 9.974  | 9.058 | 9.506  | 8.796 | 8.955 | 9.865  |
| 10.397 | 9.473 | 10.056 | 9.280 | 9.432 | 10.315 |
| 10.067 | 9.104 | 9.738  | 9.075 | 9.199 | 9.964  |
| 10.074 | 8.978 | 9.655  | 8.849 | 9.058 | 9.883  |
| 10.098 | 9.132 | 9.644  | 8.774 | 8.872 | 9.859  |
| 4.148  | 4.581 | 4.847  | 4.121 | 3.835 | 4.171  |
| 4.213  | 4.508 | 5.309  | 4.600 | 4.579 | 4.678  |
| 7.133  | 7.278 | 7.303  | 8.039 | 8.218 | 9.904  |
| 7.762  | 7.800 | 8.101  | 7.916 | 7.621 | 6.896  |
| 9.604  | 9.044 | 9.640  | 8.760 | 8.698 | 9.292  |
| 3.152  | 2.013 | 1.707  | 2.050 | 2.871 | 2.640  |
| 2.769  | 1.635 | 2.845  | 1.935 | 1.087 | 2.007  |
| 9.626  | 9.035 | 9.618  | 8.403 | 8.060 | 8.934  |
| 2.891  | 4.379 | 4.371  | 3.031 | 3.808 | 1.264  |
| 4.866  | 3.937 | 4.546  | 3.968 | 4.546 | 6.192  |
| 2.408  | 2.041 | 2.162  | 2.019 | 1.778 | 3.156  |
| 4.700  | 4.651 | 4.936  | 4.436 | 4.830 | 5.687  |
| 4.039  | 3.720 | 3.447  | 3.582 | 3.396 | 3.867  |
| 9.635  | 9.205 | 9.713  | 9.371 | 9.075 | 7.967  |
| 4.948  | 5.120 | 5.452  | 5.197 | 5.137 | 5.334  |
| 5.492  | 4.535 | 5.225  | 4.532 | 4.455 | 2.351  |
| 5.474  | 4.366 | 4.602  | 4.194 | 4.446 | 2.787  |
| 5.891  | 5.647 | 5.899  | 5.545 | 5.661 | 2.123  |
| 3.846  | 4.228 | 4.115  | 3.736 | 4.278 | 2.019  |
| 8.802  | 8.988 | 9.118  | 8.599 | 8.866 | 5.624  |
| 3.181  | 3.658 | 3.977  | 3.747 | 3.428 | 4.978  |
| 4.663  | 4.698 | 4.878  | 4.298 | 4.663 | 1.857  |
| 4.097  | 3.928 | 4.309  | 3.987 | 3.853 | 2.799  |
| 5.792  | 6.227 | 6.240  | 5.650 | 5.944 | 3.020  |
| 5.364  | 5.860 | 5.923  | 5.121 | 5.077 | 2.796  |
| 1.715  | 2.375 | 1.962  | 1.725 | 1.848 | 2.293  |
| 5.087  | 5.322 | 5.480  | 5.156 | 5.904 | 3.396  |
| 3.006  | 3.245 | 3.131  | 2.622 | 2.713 | 3.632  |
| 1.893  | 2.813 | 2.802  | 3.057 | 2.712 | 2.427  |
| 2.805  | 2.425 | 3.120  | 2.907 | 2.921 | 3.712  |
| 4.713  | 4.065 | 4.286  | 4.344 | 3.848 | 5.428  |
| 4.203  | 4.143 | 3.917  | 4.314 | 4.335 | 4.998  |
| 2.932  | 2.794 | 3.252  | 3.116 | 2.973 | 2.679  |
| 4.879  | 5.023 | 4.774  | 5.225 | 5.014 | 3.505  |
| 5.724  | 5.837 | 5.406  | 5.918 | 5.532 | 5.073  |
| 5.084  | 4.690 | 4.879  | 4.095 | 4.665 | 4.605  |
| 6.078  | 5.559 | 5.481  | 5.437 | 5.917 | 4.662  |
| 3.252  | 2.727 | 3.470  | 2.886 | 2.610 | 2.367  |
| 5.330  | 5.489 | 5.572  | 5.066 | 4.996 | 2.093  |
| 5.920  | 6.281 | 5.998  | 6.259 | 6.068 | 5.730  |
| 3.806  | 4.284 | 3.648  | 4.388 | 4.825 | 4.806  |
| 6.720  | 7.037 | 5.633  | 6.124 | 6.015 | 6.149  |
| 4.427  | 4.033 | 4.249  | 4.029 | 4.037 | 3.942  |
| 3.442  | 4.165 | 3.526  | 4.035 | 3.296 | 4.708  |
| 5.615  | 6.175 | 6.161  | 6.361 | 5.607 | 6.321  |

|       |       |       |       |        |       |
|-------|-------|-------|-------|--------|-------|
| 3.807 | 4.228 | 3.772 | 3.917 | 4.133  | 3.137 |
| 4.383 | 3.889 | 4.314 | 4.434 | 4.399  | 4.268 |
| 9.434 | 9.404 | 9.329 | 9.277 | 9.238  | 8.494 |
| 4.545 | 4.045 | 4.459 | 4.106 | 4.355  | 4.571 |
| 4.366 | 4.306 | 3.874 | 3.901 | 4.111  | 4.011 |
| 4.283 | 4.246 | 4.228 | 3.836 | 3.972  | 3.912 |
| 4.821 | 4.760 | 4.343 | 4.278 | 4.354  | 4.300 |
| 5.453 | 5.920 | 5.711 | 5.487 | 5.943  | 4.996 |
| 5.377 | 5.164 | 5.386 | 5.099 | 5.250  | 4.347 |
| 4.112 | 4.050 | 4.057 | 3.057 | 4.193  | 3.244 |
| 6.966 | 6.752 | 6.731 | 6.285 | 6.929  | 7.683 |
| 3.401 | 3.335 | 3.335 | 3.567 | 3.178  | 3.594 |
| 4.931 | 5.873 | 5.806 | 3.667 | 4.800  | 5.071 |
| 4.213 | 4.814 | 5.087 | 4.291 | 4.405  | 3.958 |
| 2.606 | 3.305 | 3.096 | 3.249 | 3.579  | 4.508 |
| 3.162 | 3.603 | 3.477 | 3.861 | 4.718  | 4.185 |
| 7.825 | 8.126 | 9.971 | 8.104 | 10.510 | 6.457 |
| 2.953 | 3.546 | 3.715 | 2.984 | 3.672  | 3.220 |
| 5.475 | 5.693 | 6.090 | 5.502 | 5.783  | 4.370 |
| 3.486 | 3.695 | 3.870 | 4.015 | 4.264  | 4.920 |
| 3.545 | 3.850 | 4.752 | 4.232 | 5.323  | 3.524 |
| 7.353 | 7.424 | 7.375 | 6.966 | 6.736  | 6.179 |
| 7.674 | 8.560 | 7.713 | 7.195 | 6.203  | 6.589 |
| 4.919 | 5.009 | 4.770 | 4.408 | 4.145  | 4.307 |
| 2.983 | 3.020 | 3.374 | 2.330 | 2.233  | 2.149 |
| 3.893 | 3.523 | 3.880 | 3.157 | 2.849  | 2.668 |
| 3.997 | 4.050 | 4.457 | 3.275 | 2.868  | 3.089 |
| 4.493 | 4.589 | 4.943 | 3.828 | 3.279  | 3.544 |
| 3.408 | 3.605 | 3.612 | 2.891 | 3.057  | 3.033 |
| 3.293 | 2.961 | 3.324 | 2.627 | 3.641  | 2.780 |
| 4.960 | 4.985 | 4.900 | 4.868 | 5.135  | 6.089 |
| 3.103 | 2.820 | 3.035 | 2.613 | 3.002  | 3.483 |
| 6.639 | 6.665 | 6.431 | 6.519 | 6.318  | 5.592 |
| 2.666 | 4.040 | 3.211 | 3.192 | 4.002  | 0.891 |
| 6.524 | 6.730 | 6.683 | 6.798 | 6.669  | 6.663 |
| 3.272 | 2.579 | 2.566 | 3.272 | 2.681  | 4.618 |
| 3.438 | 3.518 | 3.777 | 3.435 | 3.446  | 4.330 |
| 3.360 | 4.385 | 4.246 | 3.996 | 4.085  | 3.385 |
| 2.826 | 2.493 | 1.668 | 2.339 | 2.482  | 2.603 |
| 2.822 | 2.516 | 2.734 | 3.007 | 3.019  | 2.251 |
| 3.600 | 3.439 | 3.329 | 3.380 | 3.703  | 2.298 |
| 4.754 | 4.554 | 4.181 | 4.474 | 4.129  | 3.418 |
| 5.620 | 5.537 | 5.451 | 4.612 | 4.568  | 3.160 |
| 6.856 | 5.034 | 5.533 | 6.324 | 6.116  | 6.035 |
| 3.999 | 3.646 | 3.997 | 3.807 | 3.924  | 3.308 |
| 8.132 | 8.556 | 8.235 | 8.102 | 8.455  | 8.745 |
| 2.872 | 2.901 | 3.753 | 2.440 | 3.608  | 1.379 |
| 4.070 | 4.207 | 3.617 | 3.885 | 3.839  | 2.934 |
| 3.143 | 3.495 | 4.062 | 2.613 | 3.374  | 3.987 |
| 4.422 | 3.328 | 4.154 | 3.590 | 3.176  | 3.251 |

|       |       |       |       |       |       |
|-------|-------|-------|-------|-------|-------|
| 4.690 | 4.752 | 4.767 | 4.295 | 4.781 | 4.705 |
| 2.490 | 2.198 | 2.642 | 2.106 | 2.512 | 2.456 |
| 2.391 | 3.151 | 2.256 | 2.845 | 2.120 | 3.315 |
| 2.264 | 2.509 | 3.521 | 2.581 | 2.686 | 2.562 |
| 3.584 | 2.435 | 3.485 | 1.984 | 3.242 | 3.242 |
| 2.434 | 2.365 | 2.330 | 2.369 | 1.935 | 2.167 |
| 3.935 | 1.981 | 2.184 | 3.542 | 2.534 | 1.815 |
| 1.128 | 2.211 | 2.238 | 2.168 | 2.259 | 2.079 |
| 6.621 | 6.844 | 6.903 | 6.837 | 6.769 | 6.437 |
| 2.908 | 2.124 | 2.603 | 2.604 | 2.320 | 3.425 |
| 3.101 | 2.025 | 2.496 | 2.538 | 2.633 | 1.821 |
| 2.090 | 2.852 | 2.189 | 2.920 | 2.594 | 2.398 |
| 2.715 | 1.869 | 2.595 | 2.531 | 2.765 | 3.497 |
| 1.501 | 1.934 | 2.168 | 1.538 | 2.849 | 2.747 |
| 2.414 | 2.135 | 1.731 | 1.831 | 1.569 | 2.756 |
| 4.412 | 5.239 | 4.689 | 3.756 | 5.396 | 4.731 |
| 3.028 | 3.060 | 3.173 | 3.154 | 2.662 | 1.954 |
| 2.863 | 1.946 | 2.471 | 1.938 | 2.440 | 4.854 |
| 4.718 | 5.322 | 5.046 | 4.938 | 5.423 | 4.707 |
| 2.245 | 3.350 | 3.646 | 3.322 | 4.588 | 2.845 |
| 3.250 | 2.929 | 3.835 | 2.189 | 2.446 | 2.165 |
| 3.035 | 3.187 | 2.776 | 2.703 | 2.929 | 2.563 |
| 3.875 | 3.857 | 3.809 | 3.573 | 4.005 | 4.204 |
| 2.390 | 2.036 | 2.640 | 1.987 | 2.834 | 2.709 |
| 3.455 | 2.533 | 2.083 | 2.596 | 3.320 | 2.617 |
| 2.105 | 1.440 | 2.418 | 2.768 | 1.088 | 2.728 |
| 3.222 | 3.262 | 2.787 | 2.693 | 3.013 | 4.514 |
| 5.103 | 4.721 | 4.907 | 5.326 | 5.042 | 6.195 |
| 6.883 | 6.376 | 6.573 | 6.243 | 6.438 | 4.988 |
| 5.278 | 5.208 | 5.002 | 5.106 | 5.123 | 5.130 |
| 3.737 | 4.444 | 3.961 | 3.902 | 3.621 | 4.315 |
| 5.103 | 4.608 | 5.233 | 4.727 | 4.847 | 3.944 |
| 2.528 | 2.485 | 2.361 | 1.925 | 1.666 | 1.444 |
| 7.740 | 6.929 | 7.365 | 7.555 | 7.075 | 7.467 |
| 5.170 | 5.117 | 5.016 | 5.024 | 5.122 | 6.009 |
| 2.748 | 2.963 | 2.480 | 2.217 | 2.528 | 3.215 |
| 2.661 | 2.748 | 2.443 | 2.258 | 2.790 | 3.553 |
| 3.418 | 3.077 | 2.957 | 3.582 | 3.569 | 4.227 |
| 3.924 | 3.697 | 3.869 | 2.966 | 3.810 | 3.798 |
| 3.824 | 4.535 | 4.026 | 3.984 | 3.863 | 4.559 |
| 1.593 | 1.429 | 1.636 | 1.074 | 1.801 | 1.578 |
| 3.819 | 3.680 | 2.900 | 4.079 | 4.151 | 4.381 |
| 1.586 | 1.672 | 1.994 | 1.597 | 1.944 | 1.922 |
| 4.047 | 4.035 | 4.836 | 4.396 | 3.918 | 1.568 |
| 5.920 | 6.302 | 5.874 | 5.932 | 6.027 | 6.956 |
| 2.658 | 2.797 | 2.847 | 2.608 | 2.677 | 2.593 |
| 3.836 | 4.147 | 4.052 | 4.268 | 3.614 | 4.917 |
| 6.006 | 6.569 | 6.269 | 6.072 | 6.262 | 7.379 |
| 4.672 | 4.307 | 4.594 | 4.547 | 4.436 | 5.440 |
| 4.121 | 3.877 | 3.714 | 2.978 | 3.535 | 4.387 |

|       |       |       |        |       |       |
|-------|-------|-------|--------|-------|-------|
| 4.053 | 4.658 | 4.716 | 3.718  | 3.864 | 4.661 |
| 3.099 | 3.896 | 3.098 | 3.118  | 2.362 | 3.037 |
| 1.043 | 2.070 | 1.907 | 1.119  | 1.789 | 2.773 |
| 3.446 | 2.848 | 2.518 | 2.325  | 3.493 | 3.146 |
| 4.764 | 5.372 | 5.186 | 4.329  | 4.508 | 4.525 |
| 2.872 | 2.244 | 1.689 | 2.189  | 1.841 | 1.660 |
| 3.749 | 3.416 | 3.306 | 3.546  | 3.477 | 2.568 |
| 6.464 | 6.807 | 6.457 | 6.843  | 6.796 | 6.507 |
| 2.263 | 3.063 | 2.535 | 3.023  | 2.970 | 0.870 |
| 5.419 | 5.958 | 4.020 | 5.032  | 3.610 | 3.803 |
| 2.192 | 1.825 | 1.702 | 1.727  | 2.021 | 2.315 |
| 1.708 | 2.627 | 1.983 | 1.729  | 1.915 | 1.870 |
| 1.802 | 1.910 | 3.304 | 3.958  | 2.440 | 2.906 |
| 2.297 | 2.244 | 1.700 | 1.551  | 2.042 | 1.753 |
| 2.887 | 2.609 | 2.529 | 1.987  | 2.726 | 2.010 |
| 2.114 | 1.902 | 1.737 | 2.074  | 1.755 | 1.620 |
| 4.211 | 4.809 | 4.952 | 3.910  | 4.442 | 4.216 |
| 4.076 | 4.255 | 4.972 | 4.261  | 4.411 | 3.498 |
| 3.345 | 2.888 | 3.180 | 4.003  | 3.128 | 3.479 |
| 3.783 | 3.347 | 3.834 | 4.494  | 3.728 | 3.797 |
| 5.378 | 5.449 | 5.431 | 5.337  | 4.994 | 5.246 |
| 5.107 | 4.749 | 4.540 | 4.767  | 5.168 | 5.739 |
| 2.525 | 1.852 | 2.087 | 2.097  | 2.302 | 2.102 |
| 6.287 | 6.196 | 6.031 | 6.501  | 6.096 | 3.949 |
| 6.937 | 7.336 | 7.040 | 7.184  | 7.228 | 6.515 |
| 5.381 | 5.450 | 5.595 | 5.955  | 5.745 | 6.563 |
| 2.732 | 2.879 | 3.464 | 3.113  | 2.932 | 2.879 |
| 9.665 | 9.947 | 9.855 | 10.022 | 9.942 | 8.397 |
| 4.935 | 4.982 | 5.228 | 5.139  | 5.477 | 5.878 |
| 2.922 | 2.721 | 2.173 | 1.913  | 2.302 | 2.932 |
| 2.884 | 1.870 | 3.087 | 2.530  | 2.981 | 1.014 |
| 3.284 | 4.850 | 3.994 | 4.488  | 3.784 | 4.690 |
| 6.330 | 6.440 | 6.605 | 6.295  | 6.306 | 6.004 |
| 3.506 | 4.187 | 4.062 | 3.965  | 4.353 | 3.870 |
| 7.872 | 7.932 | 7.893 | 7.756  | 7.875 | 7.204 |
| 4.911 | 4.404 | 4.451 | 4.824  | 4.516 | 3.826 |
| 7.250 | 7.307 | 7.108 | 6.971  | 7.237 | 6.681 |
| 5.048 | 5.561 | 5.322 | 4.810  | 4.775 | 6.432 |
| 5.162 | 5.042 | 5.075 | 5.089  | 4.718 | 4.473 |
| 7.909 | 7.622 | 7.785 | 7.902  | 7.758 | 7.599 |
| 2.812 | 3.254 | 2.548 | 2.811  | 3.535 | 2.540 |
| 5.627 | 5.509 | 5.342 | 5.591  | 5.361 | 6.197 |
| 2.772 | 2.086 | 1.894 | 1.700  | 2.174 | 1.901 |
| 7.270 | 7.687 | 6.850 | 7.084  | 6.895 | 7.608 |
| 6.061 | 6.656 | 6.637 | 6.092  | 6.336 | 5.257 |
| 2.415 | 3.116 | 4.002 | 2.966  | 3.062 | 2.432 |
| 2.653 | 2.095 | 3.376 | 2.181  | 2.427 | 1.558 |
| 4.951 | 4.901 | 5.138 | 4.373  | 4.424 | 4.080 |
| 4.945 | 4.904 | 5.464 | 4.952  | 4.945 | 5.102 |
| 6.953 | 6.994 | 7.023 | 6.895  | 7.062 | 6.155 |

|       |       |       |       |       |       |
|-------|-------|-------|-------|-------|-------|
| 3.647 | 2.697 | 3.568 | 3.963 | 4.566 | 5.126 |
| 7.066 | 7.101 | 6.934 | 7.160 | 7.285 | 4.634 |
| 5.712 | 5.568 | 6.028 | 6.013 | 5.484 | 5.569 |
| 5.793 | 6.077 | 5.808 | 6.256 | 6.168 | 7.005 |
| 4.500 | 3.674 | 3.845 | 4.283 | 4.167 | 3.928 |
| 7.534 | 7.642 | 7.577 | 7.542 | 7.661 | 7.331 |
| 4.359 | 3.377 | 4.195 | 4.218 | 4.210 | 3.859 |
| 6.024 | 4.191 | 4.746 | 5.208 | 5.226 | 5.584 |
| 7.150 | 6.234 | 6.419 | 6.879 | 6.208 | 6.708 |
| 6.900 | 5.133 | 5.897 | 6.652 | 6.059 | 6.251 |
| 5.125 | 4.785 | 4.857 | 5.738 | 4.360 | 4.191 |
| 4.628 | 4.231 | 3.552 | 4.504 | 4.075 | 3.951 |
| 4.737 | 4.363 | 4.146 | 4.450 | 4.168 | 3.790 |
| 3.248 | 2.501 | 2.459 | 3.656 | 2.449 | 2.798 |
| 4.940 | 4.250 | 4.437 | 5.368 | 4.760 | 4.951 |
| 4.075 | 3.064 | 2.601 | 3.286 | 2.467 | 3.026 |
| 9.012 | 8.282 | 8.650 | 9.088 | 8.689 | 9.061 |
| 3.316 | 3.562 | 3.798 | 2.820 | 3.236 | 2.997 |
| 8.554 | 7.926 | 7.804 | 8.775 | 7.998 | 8.348 |
| 4.472 | 3.483 | 3.397 | 3.281 | 3.472 | 3.291 |
| 7.708 | 7.425 | 7.158 | 7.986 | 7.256 | 7.160 |
| 9.715 | 8.982 | 9.118 | 9.768 | 9.171 | 9.634 |
| 6.090 | 5.794 | 5.633 | 6.522 | 5.711 | 5.845 |
| 8.968 | 8.573 | 8.534 | 9.339 | 8.826 | 9.029 |
| 7.795 | 7.107 | 7.167 | 7.884 | 7.458 | 7.572 |
| 6.157 | 5.158 | 5.645 | 6.203 | 5.410 | 6.312 |
| 7.771 | 7.276 | 7.352 | 7.833 | 7.480 | 7.494 |
| 8.798 | 8.222 | 8.481 | 8.970 | 8.529 | 8.541 |
| 7.626 | 7.112 | 7.019 | 7.705 | 7.171 | 7.150 |
| 6.861 | 6.524 | 6.134 | 6.900 | 6.416 | 6.577 |
| 8.054 | 7.435 | 7.414 | 8.111 | 7.584 | 7.897 |
| 6.010 | 4.372 | 5.366 | 5.804 | 5.468 | 5.753 |
| 5.723 | 5.118 | 5.685 | 5.898 | 5.689 | 5.176 |
| 4.623 | 4.086 | 4.027 | 4.857 | 3.860 | 4.006 |
| 7.063 | 6.878 | 6.755 | 6.874 | 6.922 | 7.718 |
| 2.816 | 2.286 | 2.640 | 2.479 | 2.300 | 2.201 |
| 8.014 | 7.994 | 7.936 | 7.872 | 8.081 | 7.004 |
| 6.272 | 6.103 | 6.091 | 6.015 | 6.306 | 4.485 |
| 5.551 | 5.415 | 5.700 | 5.689 | 5.824 | 3.780 |
| 5.113 | 4.145 | 4.539 | 4.656 | 4.237 | 3.304 |
| 3.881 | 4.483 | 4.769 | 4.571 | 4.385 | 4.295 |
| 3.629 | 3.411 | 3.899 | 3.954 | 3.392 | 3.449 |
| 5.428 | 4.800 | 4.815 | 5.118 | 4.674 | 5.163 |
| 2.526 | 3.125 | 3.068 | 3.049 | 3.599 | 3.596 |
| 6.913 | 7.211 | 7.288 | 7.022 | 7.162 | 6.217 |
| 3.655 | 3.177 | 3.102 | 2.746 | 4.328 | 3.435 |
| 6.160 | 5.221 | 5.619 | 5.958 | 5.974 | 6.379 |
| 2.718 | 3.112 | 2.216 | 2.505 | 3.055 | 3.157 |
| 3.865 | 4.650 | 5.111 | 4.308 | 3.750 | 4.934 |
| 4.809 | 4.850 | 5.233 | 4.698 | 5.494 | 5.395 |

|       |       |       |       |       |       |
|-------|-------|-------|-------|-------|-------|
| 3.047 | 1.803 | 2.814 | 2.580 | 2.395 | 2.676 |
| 5.104 | 5.541 | 5.464 | 5.694 | 5.607 | 4.824 |
| 4.157 | 3.932 | 3.773 | 3.729 | 4.088 | 2.794 |
| 7.480 | 7.145 | 7.256 | 6.939 | 7.049 | 6.765 |
| 1.768 | 1.239 | 1.925 | 1.244 | 1.891 | 2.239 |
| 1.279 | 1.987 | 1.584 | 1.082 | 1.754 | 1.640 |
| 2.932 | 3.119 | 2.969 | 2.302 | 3.284 | 4.228 |
| 2.602 | 2.511 | 2.830 | 2.270 | 2.735 | 3.423 |
| 4.241 | 4.298 | 4.194 | 4.416 | 4.749 | 4.078 |
| 6.011 | 5.981 | 5.918 | 5.847 | 5.856 | 5.195 |
| 2.307 | 2.979 | 1.974 | 1.850 | 2.477 | 2.487 |
| 3.673 | 3.303 | 2.876 | 3.597 | 3.640 | 2.519 |
| 4.048 | 3.843 | 3.649 | 3.199 | 3.304 | 1.689 |
| 3.253 | 3.248 | 3.325 | 3.350 | 3.376 | 3.569 |
| 6.129 | 6.415 | 6.614 | 6.935 | 6.464 | 7.439 |
| 4.431 | 4.343 | 4.429 | 5.018 | 4.456 | 4.036 |
| 8.210 | 8.412 | 8.365 | 8.196 | 8.385 | 7.400 |
| 1.991 | 2.924 | 1.708 | 2.685 | 2.826 | 3.369 |
| 3.488 | 3.842 | 3.557 | 3.741 | 3.523 | 5.048 |
| 1.913 | 1.693 | 1.461 | 1.931 | 2.384 | 1.837 |
| 4.563 | 4.405 | 4.051 | 4.573 | 4.752 | 6.982 |
| 5.281 | 5.718 | 5.516 | 5.288 | 5.204 | 4.647 |
| 3.265 | 2.761 | 2.970 | 2.240 | 2.590 | 1.766 |
| 4.341 | 3.859 | 3.579 | 3.128 | 3.453 | 3.840 |
| 4.675 | 4.580 | 4.009 | 4.414 | 4.456 | 5.136 |
| 5.027 | 4.141 | 4.582 | 4.449 | 4.841 | 2.485 |
| 5.791 | 5.703 | 5.378 | 5.378 | 5.812 | 4.667 |
| 2.532 | 2.967 | 3.451 | 2.285 | 2.839 | 3.986 |
| 4.564 | 4.179 | 4.540 | 3.793 | 3.774 | 5.110 |
| 8.484 | 8.559 | 8.040 | 8.343 | 8.399 | 9.292 |
| 3.989 | 3.591 | 4.407 | 3.679 | 4.114 | 5.920 |
| 4.442 | 3.736 | 3.752 | 3.947 | 3.762 | 4.220 |
| 2.753 | 2.748 | 3.361 | 2.626 | 2.552 | 3.514 |
| 1.953 | 2.445 | 1.745 | 1.600 | 1.726 | 2.617 |
| 3.658 | 3.908 | 3.392 | 1.909 | 3.420 | 3.107 |
| 3.853 | 3.624 | 3.939 | 4.670 | 4.224 | 3.404 |
| 5.668 | 6.295 | 6.140 | 5.820 | 5.665 | 7.305 |
| 4.984 | 4.494 | 4.773 | 4.147 | 4.733 | 5.698 |
| 7.501 | 7.232 | 6.995 | 7.771 | 7.119 | 8.787 |
| 4.838 | 4.007 | 3.522 | 4.046 | 4.168 | 6.350 |
| 5.107 | 3.260 | 2.733 | 2.878 | 3.918 | 2.401 |
| 6.359 | 6.436 | 6.258 | 6.935 | 6.534 | 5.914 |
| 5.413 | 4.959 | 4.958 | 4.642 | 4.823 | 1.988 |
| 7.002 | 7.030 | 7.281 | 6.940 | 7.199 | 8.417 |
| 3.407 | 2.610 | 2.816 | 3.050 | 1.973 | 4.133 |
| 6.062 | 4.963 | 5.547 | 5.141 | 5.880 | 4.690 |
| 8.475 | 7.978 | 8.181 | 8.207 | 8.227 | 5.002 |
| 3.587 | 2.377 | 3.643 | 3.329 | 2.702 | 1.394 |
| 7.391 | 7.321 | 7.112 | 6.972 | 7.077 | 7.563 |
| 3.973 | 3.698 | 3.311 | 3.973 | 3.721 | 3.973 |

|       |       |       |       |       |       |
|-------|-------|-------|-------|-------|-------|
| 2.198 | 2.186 | 2.037 | 1.790 | 2.054 | 2.639 |
| 3.025 | 2.726 | 2.335 | 2.358 | 2.131 | 1.565 |
| 4.340 | 4.166 | 4.517 | 3.677 | 4.455 | 4.604 |
| 8.165 | 7.996 | 8.079 | 8.324 | 8.184 | 7.396 |
| 3.525 | 3.234 | 3.658 | 3.301 | 3.409 | 4.935 |
| 3.510 | 4.279 | 4.365 | 3.828 | 3.439 | 3.714 |
| 3.523 | 3.980 | 3.510 | 3.092 | 3.891 | 3.112 |
| 6.669 | 6.537 | 6.537 | 6.606 | 6.788 | 5.258 |
| 6.485 | 6.064 | 6.423 | 6.685 | 6.655 | 7.558 |
| 4.440 | 4.559 | 3.976 | 4.283 | 4.132 | 3.747 |
| 3.947 | 3.562 | 3.597 | 2.891 | 2.789 | 1.793 |
| 6.000 | 5.935 | 5.880 | 5.398 | 5.623 | 4.766 |
| 1.535 | 2.042 | 1.874 | 1.520 | 2.332 | 1.858 |
| 7.255 | 7.311 | 6.940 | 7.245 | 7.134 | 4.622 |
| 6.010 | 5.485 | 5.713 | 5.797 | 5.762 | 3.672 |
| 4.950 | 5.110 | 5.125 | 5.401 | 5.027 | 6.241 |
| 7.815 | 7.046 | 6.623 | 6.530 | 7.138 | 7.351 |
| 4.124 | 4.259 | 4.470 | 4.182 | 4.610 | 5.486 |
| 6.958 | 6.867 | 7.077 | 6.936 | 6.956 | 8.345 |
| 6.935 | 6.731 | 6.772 | 7.109 | 6.772 | 5.190 |
| 4.537 | 4.265 | 4.301 | 4.963 | 4.657 | 5.975 |
| 5.757 | 5.412 | 4.588 | 5.132 | 5.411 | 4.907 |
| 3.455 | 3.166 | 3.565 | 3.378 | 2.768 | 3.545 |
| 2.342 | 2.629 | 3.199 | 1.863 | 2.868 | 4.591 |
| 5.978 | 6.370 | 6.215 | 6.121 | 6.290 | 5.134 |
| 2.256 | 3.042 | 3.140 | 3.271 | 2.041 | 1.470 |
| 3.752 | 3.885 | 3.752 | 4.369 | 4.286 | 5.115 |
| 3.172 | 3.135 | 3.524 | 3.025 | 2.766 | 1.398 |
| 5.290 | 5.030 | 5.018 | 5.172 | 5.188 | 5.154 |
| 6.001 | 5.907 | 6.240 | 6.377 | 6.010 | 5.457 |
| 5.014 | 5.078 | 4.873 | 5.141 | 4.997 | 3.774 |
| 3.483 | 4.289 | 3.906 | 4.114 | 3.603 | 2.693 |
| 6.141 | 6.357 | 6.415 | 6.351 | 6.711 | 4.123 |
| 8.190 | 8.170 | 8.220 | 8.087 | 8.201 | 6.680 |
| 5.711 | 5.800 | 5.785 | 5.679 | 5.504 | 4.669 |
| 6.192 | 5.703 | 6.419 | 5.956 | 5.891 | 3.385 |
| 3.893 | 2.818 | 3.597 | 2.249 | 3.120 | 3.553 |
| 6.611 | 6.455 | 6.700 | 6.647 | 6.579 | 5.715 |
| 5.540 | 5.822 | 5.883 | 5.753 | 5.890 | 3.585 |
| 4.958 | 4.966 | 4.682 | 4.709 | 5.024 | 3.270 |
| 5.082 | 5.383 | 5.146 | 5.407 | 5.029 | 3.323 |
| 7.296 | 7.328 | 7.301 | 6.959 | 7.315 | 4.030 |
| 5.060 | 5.313 | 5.477 | 5.093 | 5.162 | 3.865 |
| 5.712 | 5.826 | 5.652 | 5.580 | 5.689 | 3.496 |
| 7.714 | 7.936 | 8.104 | 7.927 | 8.060 | 4.545 |
| 4.863 | 4.918 | 4.402 | 4.662 | 4.477 | 3.863 |
| 2.878 | 3.244 | 3.373 | 3.347 | 3.175 | 4.099 |
| 7.973 | 7.236 | 7.631 | 7.573 | 7.607 | 7.502 |
| 8.237 | 7.792 | 7.914 | 7.751 | 7.771 | 5.457 |
| 2.868 | 2.760 | 2.372 | 3.706 | 2.644 | 2.539 |



|       |       |       |       |       |       |
|-------|-------|-------|-------|-------|-------|
| 1.844 | 2.305 | 2.285 | 2.613 | 2.351 | 2.656 |
| 3.678 | 3.988 | 3.904 | 3.393 | 3.612 | 3.419 |
| 4.771 | 5.557 | 5.344 | 5.212 | 5.255 | 3.070 |
| 3.274 | 2.671 | 3.093 | 2.643 | 2.899 | 3.822 |
| 4.773 | 4.973 | 4.895 | 4.661 | 4.425 | 2.186 |
| 8.337 | 8.123 | 8.156 | 8.095 | 8.336 | 5.364 |
| 4.467 | 4.454 | 4.406 | 4.583 | 4.115 | 2.958 |
| 3.778 | 3.851 | 3.559 | 3.292 | 3.843 | 3.810 |
| 6.677 | 6.482 | 6.765 | 6.510 | 6.786 | 3.140 |
| 3.404 | 3.319 | 3.746 | 4.046 | 3.776 | 2.207 |
| 6.534 | 6.464 | 6.218 | 5.919 | 6.391 | 3.209 |
| 7.564 | 6.830 | 7.181 | 6.916 | 7.155 | 5.567 |
| 5.313 | 5.481 | 4.448 | 6.157 | 6.409 | 7.154 |
| 4.744 | 5.557 | 5.419 | 4.833 | 5.220 | 4.624 |
| 5.994 | 5.280 | 5.833 | 5.433 | 5.839 | 3.546 |
| 6.444 | 6.287 | 6.636 | 6.551 | 6.671 | 5.225 |
| 6.557 | 5.188 | 6.194 | 6.735 | 5.596 | 3.005 |
| 7.608 | 5.399 | 6.577 | 7.621 | 5.962 | 3.825 |
| 7.703 | 7.094 | 7.247 | 7.621 | 7.680 | 9.120 |
| 3.791 | 4.423 | 3.749 | 3.506 | 3.977 | 3.692 |
| 2.956 | 2.373 | 2.868 | 2.725 | 2.598 | 2.083 |
| 4.893 | 4.294 | 4.712 | 4.912 | 4.419 | 5.832 |
| 5.553 | 5.529 | 5.924 | 5.817 | 5.840 | 7.221 |
| 3.679 | 3.698 | 3.928 | 4.052 | 4.294 | 5.297 |
| 7.895 | 7.640 | 7.968 | 7.749 | 7.833 | 5.703 |
| 5.544 | 6.732 | 6.737 | 6.551 | 5.533 | 3.892 |
| 2.892 | 2.628 | 2.847 | 2.994 | 2.914 | 3.494 |
| 7.067 | 6.704 | 6.840 | 6.493 | 6.599 | 4.416 |
| 3.068 | 3.797 | 3.681 | 2.962 | 3.205 | 2.654 |
| 7.290 | 7.334 | 7.358 | 6.834 | 7.451 | 5.831 |
| 4.061 | 3.887 | 4.524 | 4.281 | 3.918 | 3.377 |
| 3.058 | 3.177 | 3.166 | 3.461 | 3.444 | 2.402 |
| 1.598 | 1.909 | 1.761 | 1.706 | 1.534 | 1.602 |
| 2.795 | 3.558 | 3.408 | 2.992 | 3.028 | 2.464 |
| 4.693 | 4.164 | 4.174 | 4.062 | 4.708 | 3.515 |
| 5.087 | 5.097 | 5.225 | 5.325 | 5.436 | 4.265 |
| 3.449 | 3.437 | 3.734 | 2.983 | 3.824 | 2.921 |
| 2.906 | 2.851 | 3.307 | 3.017 | 2.858 | 3.251 |
| 4.391 | 4.890 | 4.554 | 4.174 | 4.176 | 2.880 |
| 7.609 | 7.438 | 7.094 | 7.420 | 7.378 | 5.327 |
| 3.130 | 2.508 | 2.929 | 2.657 | 3.219 | 4.074 |
| 4.053 | 4.016 | 4.296 | 4.356 | 3.879 | 3.261 |
| 6.556 | 6.983 | 6.697 | 6.924 | 6.757 | 7.073 |
| 6.285 | 6.396 | 6.692 | 6.526 | 5.949 | 3.723 |
| 6.204 | 5.949 | 6.086 | 6.420 | 5.839 | 7.639 |
| 3.045 | 4.017 | 3.568 | 2.815 | 3.617 | 3.104 |
| 2.872 | 2.845 | 3.384 | 2.764 | 3.253 | 2.950 |
| 2.203 | 2.496 | 2.706 | 2.048 | 2.965 | 3.016 |
| 2.523 | 3.828 | 2.988 | 3.245 | 3.041 | 4.653 |
| 6.084 | 6.163 | 5.983 | 5.755 | 6.220 | 3.769 |

|       |       |       |       |       |       |
|-------|-------|-------|-------|-------|-------|
| 6.085 | 5.865 | 5.886 | 5.398 | 5.818 | 2.879 |
| 7.799 | 8.099 | 7.837 | 7.718 | 7.849 | 6.060 |
| 6.600 | 6.529 | 6.601 | 6.569 | 6.146 | 3.011 |
| 5.299 | 3.403 | 4.145 | 4.844 | 4.036 | 2.655 |
| 5.969 | 5.543 | 5.842 | 5.936 | 6.223 | 2.313 |
| 6.193 | 5.980 | 5.505 | 6.036 | 5.676 | 2.720 |
| 6.497 | 5.976 | 6.221 | 6.470 | 6.583 | 3.518 |
| 5.700 | 5.676 | 5.826 | 5.392 | 5.699 | 2.822 |
| 5.619 | 6.751 | 6.630 | 5.977 | 5.925 | 1.845 |
| 6.381 | 6.245 | 6.393 | 6.144 | 6.158 | 4.492 |
| 3.577 | 3.574 | 3.707 | 3.983 | 3.784 | 4.732 |
| 6.489 | 6.757 | 6.566 | 6.522 | 6.297 | 7.079 |
| 7.091 | 6.991 | 6.965 | 6.814 | 6.884 | 3.299 |
| 6.861 | 7.269 | 7.049 | 7.119 | 7.162 | 7.696 |
| 4.581 | 4.325 | 4.374 | 4.054 | 4.385 | 3.597 |
| 4.155 | 4.138 | 4.402 | 4.631 | 4.066 | 3.719 |
| 5.798 | 0.505 | 5.587 | 5.978 | 5.566 | 1.581 |
| 5.283 | 5.421 | 5.140 | 5.399 | 5.391 | 6.556 |
| 5.932 | 4.936 | 4.773 | 4.601 | 5.177 | 4.210 |
| 3.196 | 3.781 | 3.852 | 3.264 | 3.493 | 5.657 |
| 4.413 | 6.298 | 5.731 | 5.837 | 5.612 | 4.484 |
| 5.626 | 6.319 | 5.901 | 5.468 | 5.605 | 4.263 |
| 7.555 | 6.626 | 7.026 | 7.494 | 6.739 | 4.321 |
| 6.911 | 6.509 | 6.866 | 6.935 | 6.598 | 5.218 |
| 4.190 | 4.627 | 3.775 | 4.304 | 4.423 | 5.066 |
| 4.457 | 4.493 | 3.987 | 3.731 | 4.259 | 3.829 |
| 3.948 | 3.804 | 4.014 | 3.425 | 3.684 | 4.843 |
| 4.678 | 4.664 | 4.689 | 4.679 | 4.681 | 5.052 |
| 6.029 | 6.177 | 6.206 | 6.393 | 6.067 | 4.364 |
| 6.451 | 6.197 | 6.050 | 6.301 | 6.470 | 7.179 |
| 8.113 | 8.033 | 8.262 | 8.439 | 8.186 | 7.728 |
| 8.705 | 8.681 | 8.606 | 8.503 | 8.596 | 7.056 |
| 6.546 | 6.000 | 6.520 | 6.644 | 6.153 | 5.947 |
| 3.594 | 3.792 | 3.174 | 4.022 | 4.082 | 5.226 |
| 5.920 | 5.690 | 5.957 | 6.087 | 5.862 | 5.141 |
| 4.341 | 4.489 | 4.582 | 4.084 | 4.288 | 3.435 |
| 4.205 | 3.501 | 4.248 | 4.328 | 3.780 | 3.891 |
| 3.850 | 4.786 | 4.345 | 4.448 | 4.422 | 4.537 |
| 7.742 | 7.933 | 7.883 | 7.635 | 7.943 | 5.375 |
| 8.931 | 9.105 | 9.010 | 9.197 | 9.053 | 7.481 |
| 6.468 | 5.448 | 5.525 | 6.088 | 5.873 | 5.946 |
| 6.411 | 6.177 | 6.821 | 6.619 | 6.074 | 2.623 |
| 5.677 | 5.299 | 5.664 | 5.750 | 5.827 | 4.508 |
| 7.892 | 8.286 | 8.414 | 8.286 | 8.462 | 7.885 |
| 6.419 | 6.339 | 6.639 | 6.301 | 6.319 | 4.720 |
| 6.522 | 6.415 | 6.525 | 6.702 | 6.877 | 7.702 |
| 7.721 | 7.361 | 7.352 | 7.316 | 7.041 | 6.635 |
| 4.088 | 4.264 | 3.982 | 4.573 | 4.425 | 5.439 |
| 4.570 | 4.634 | 4.545 | 4.806 | 4.808 | 4.196 |
| 5.605 | 6.041 | 6.199 | 5.657 | 5.983 | 4.725 |

|        |        |        |        |        |       |
|--------|--------|--------|--------|--------|-------|
| 7.493  | 7.426  | 7.359  | 7.206  | 7.295  | 5.925 |
| 6.939  | 6.850  | 7.241  | 7.243  | 7.049  | 6.841 |
| 2.836  | 3.067  | 3.500  | 3.623  | 3.387  | 2.589 |
| 3.420  | 3.858  | 3.429  | 3.711  | 3.674  | 2.845 |
| 6.562  | 6.148  | 6.275  | 6.037  | 6.061  | 5.945 |
| 8.337  | 8.203  | 8.323  | 8.157  | 8.143  | 5.784 |
| 6.753  | 7.293  | 7.028  | 7.034  | 7.228  | 6.339 |
| 7.343  | 7.618  | 7.567  | 7.879  | 7.925  | 8.728 |
| 2.718  | 2.491  | 3.230  | 3.540  | 3.572  | 3.855 |
| 5.750  | 5.831  | 6.131  | 5.757  | 5.763  | 5.465 |
| 5.138  | 4.869  | 4.965  | 5.004  | 4.644  | 4.658 |
| 2.776  | 2.190  | 2.072  | 2.585  | 2.764  | 1.479 |
| 3.676  | 3.440  | 3.319  | 3.956  | 4.183  | 5.191 |
| 4.512  | 4.680  | 4.373  | 5.037  | 4.375  | 3.088 |
| 5.308  | 5.073  | 5.155  | 5.760  | 5.161  | 6.712 |
| 6.303  | 6.894  | 6.912  | 6.698  | 6.986  | 4.470 |
| 5.998  | 6.114  | 5.950  | 6.517  | 6.236  | 7.962 |
| 3.728  | 3.563  | 3.822  | 3.399  | 3.880  | 2.454 |
| 3.400  | 3.526  | 3.125  | 3.724  | 3.315  | 3.587 |
| 6.683  | 6.718  | 6.765  | 7.145  | 7.163  | 8.165 |
| 7.899  | 8.281  | 8.112  | 8.174  | 8.142  | 7.872 |
| 5.995  | 5.951  | 5.904  | 5.930  | 6.123  | 5.019 |
| 8.555  | 9.028  | 8.820  | 8.958  | 8.807  | 7.793 |
| 7.651  | 7.841  | 7.670  | 7.925  | 7.725  | 6.967 |
| 7.907  | 7.953  | 8.232  | 7.741  | 7.954  | 6.328 |
| 3.130  | 3.016  | 3.244  | 3.082  | 3.136  | 3.130 |
| 3.807  | 2.966  | 3.663  | 3.961  | 3.327  | 2.934 |
| 11.060 | 10.987 | 10.896 | 11.227 | 10.965 | 8.823 |
| 8.685  | 8.635  | 8.537  | 8.801  | 8.618  | 9.188 |
| 9.377  | 9.480  | 9.308  | 9.496  | 9.420  | 8.720 |
| 3.008  | 3.431  | 3.829  | 3.647  | 3.875  | 4.597 |
| 8.979  | 9.563  | 9.475  | 9.355  | 9.360  | 8.295 |
| 4.801  | 4.786  | 4.905  | 4.632  | 4.887  | 3.356 |
| 2.095  | 1.492  | 2.306  | 2.234  | 1.867  | 2.177 |
| 5.744  | 5.532  | 5.821  | 5.900  | 5.735  | 5.656 |
| 6.480  | 7.180  | 6.868  | 6.861  | 7.212  | 6.617 |
| 7.134  | 7.132  | 7.037  | 6.998  | 6.879  | 4.776 |
| 2.580  | 2.401  | 2.554  | 3.101  | 2.357  | 2.108 |
| 2.751  | 2.210  | 2.952  | 2.903  | 3.453  | 3.633 |
| 6.519  | 6.575  | 6.621  | 6.625  | 6.737  | 5.384 |
| 5.618  | 4.878  | 5.120  | 4.937  | 5.593  | 4.442 |
| 7.083  | 7.306  | 7.221  | 7.362  | 7.297  | 6.349 |
| 3.690  | 3.759  | 3.725  | 4.386  | 3.741  | 4.307 |
| 5.535  | 4.304  | 5.022  | 5.288  | 5.093  | 4.926 |
| 5.252  | 5.214  | 5.300  | 5.418  | 5.477  | 6.157 |
| 3.027  | 2.710  | 1.947  | 3.248  | 2.658  | 2.509 |
| 6.699  | 6.429  | 6.600  | 6.164  | 6.394  | 6.632 |
| 4.455  | 4.228  | 4.518  | 4.880  | 4.700  | 6.167 |
| 4.381  | 3.724  | 4.209  | 3.973  | 3.957  | 3.301 |
| 7.170  | 7.244  | 6.750  | 6.807  | 7.292  | 6.586 |

|       |       |       |       |       |       |
|-------|-------|-------|-------|-------|-------|
| 8.411 | 8.763 | 8.686 | 8.421 | 8.750 | 7.180 |
| 2.879 | 3.528 | 3.730 | 3.440 | 3.460 | 3.510 |
| 4.880 | 5.564 | 5.732 | 5.185 | 5.036 | 4.094 |
| 3.359 | 3.548 | 3.954 | 3.551 | 3.607 | 3.761 |
| 6.417 | 6.919 | 6.829 | 6.767 | 6.833 | 5.908 |
| 2.530 | 2.992 | 2.654 | 3.138 | 2.869 | 2.832 |
| 5.612 | 5.773 | 5.373 | 5.152 | 5.959 | 5.012 |
| 5.784 | 6.087 | 5.967 | 5.658 | 5.636 | 4.892 |
| 7.763 | 7.650 | 7.710 | 7.682 | 7.654 | 6.978 |
| 5.179 | 5.341 | 5.405 | 5.045 | 5.325 | 2.992 |
| 5.824 | 5.866 | 6.221 | 6.021 | 5.896 | 6.622 |
| 5.032 | 5.211 | 4.971 | 5.256 | 5.294 | 5.171 |
| 3.741 | 5.234 | 4.605 | 4.333 | 5.008 | 2.410 |
| 3.535 | 3.048 | 2.982 | 2.365 | 3.746 | 3.438 |
| 2.666 | 3.777 | 3.246 | 3.271 | 3.180 | 2.846 |
| 3.875 | 3.187 | 3.026 | 3.230 | 4.361 | 3.499 |
| 6.404 | 6.370 | 6.828 | 7.521 | 8.062 | 9.909 |
| 6.303 | 7.061 | 6.515 | 6.199 | 6.596 | 3.209 |
| 3.260 | 2.260 | 1.973 | 3.029 | 2.790 | 3.916 |
| 2.203 | 2.811 | 2.406 | 3.313 | 2.109 | 3.348 |
| 5.841 | 5.263 | 5.254 | 5.451 | 5.703 | 4.803 |
| 2.112 | 2.914 | 3.054 | 1.358 | 3.133 | 1.292 |
| 4.272 | 4.639 | 4.385 | 4.255 | 4.813 | 4.252 |
| 7.373 | 7.560 | 7.520 | 7.246 | 7.388 | 6.437 |
| 6.626 | 6.662 | 6.809 | 6.757 | 6.651 | 5.758 |
| 5.654 | 6.009 | 5.947 | 5.626 | 5.823 | 4.920 |
| 6.294 | 6.478 | 6.340 | 6.884 | 6.446 | 5.932 |
| 1.908 | 2.016 | 2.256 | 1.962 | 2.317 | 2.445 |
| 4.026 | 4.311 | 4.472 | 4.170 | 4.157 | 4.117 |
| 1.852 | 2.289 | 3.027 | 2.163 | 2.475 | 1.462 |
| 3.431 | 3.000 | 3.907 | 3.814 | 2.428 | 3.697 |
| 6.692 | 6.834 | 7.028 | 7.006 | 7.260 | 4.563 |
| 2.428 | 1.570 | 2.834 | 1.602 | 1.374 | 1.731 |
| 3.314 | 3.052 | 3.774 | 3.393 | 3.505 | 4.267 |
| 2.644 | 3.319 | 3.590 | 3.412 | 2.426 | 3.755 |
| 4.486 | 4.803 | 4.330 | 4.789 | 3.758 | 2.436 |
| 2.230 | 2.970 | 2.642 | 2.379 | 2.189 | 2.266 |
| 3.219 | 2.853 | 3.564 | 3.256 | 3.192 | 3.734 |
| 6.876 | 6.439 | 6.728 | 6.670 | 6.546 | 5.972 |
| 2.387 | 2.823 | 1.886 | 2.099 | 1.912 | 2.680 |
| 7.327 | 7.013 | 7.000 | 6.922 | 7.047 | 5.066 |
| 3.711 | 4.310 | 3.426 | 4.036 | 3.903 | 3.138 |
| 5.191 | 4.874 | 5.211 | 5.420 | 5.128 | 4.780 |
| 1.652 | 2.558 | 1.352 | 0.915 | 2.219 | 2.753 |
| 2.068 | 2.310 | 1.756 | 2.005 | 2.558 | 3.860 |
| 4.454 | 5.437 | 5.718 | 5.481 | 6.013 | 6.082 |
| 3.300 | 3.888 | 3.189 | 2.817 | 3.190 | 3.587 |
| 3.544 | 3.706 | 3.542 | 3.831 | 4.097 | 4.546 |
| 5.156 | 4.821 | 4.585 | 4.808 | 4.679 | 2.941 |
| 5.070 | 5.077 | 4.732 | 4.747 | 4.903 | 5.620 |

|       |       |       |       |       |       |
|-------|-------|-------|-------|-------|-------|
| 2.212 | 4.094 | 2.859 | 3.575 | 3.488 | 2.723 |
| 5.540 | 5.532 | 5.393 | 5.507 | 5.492 | 5.294 |
| 2.793 | 3.008 | 2.581 | 2.783 | 2.453 | 2.843 |
| 7.181 | 7.206 | 7.105 | 7.227 | 7.319 | 8.226 |
| 8.053 | 8.269 | 7.889 | 8.471 | 8.299 | 9.093 |
| 8.643 | 7.772 | 7.877 | 7.655 | 7.763 | 6.954 |
| 6.449 | 6.762 | 6.623 | 6.485 | 6.614 | 5.689 |
| 6.959 | 6.938 | 6.887 | 6.767 | 6.966 | 6.520 |
| 3.591 | 4.127 | 3.714 | 3.482 | 3.083 | 2.969 |
| 5.369 | 5.769 | 5.807 | 5.336 | 5.757 | 6.243 |
| 8.382 | 8.616 | 8.706 | 7.084 | 7.705 | 8.793 |
| 6.495 | 6.209 | 6.032 | 6.260 | 6.489 | 5.188 |
| 3.419 | 4.383 | 4.263 | 4.166 | 4.713 | 4.674 |
| 4.666 | 4.260 | 4.808 | 4.521 | 4.413 | 5.036 |
| 4.868 | 4.265 | 4.161 | 4.227 | 4.463 | 5.181 |
| 3.120 | 3.642 | 3.218 | 3.437 | 3.654 | 4.087 |
| 2.094 | 2.411 | 2.204 | 2.280 | 1.829 | 2.064 |
| 5.042 | 4.384 | 4.413 | 4.469 | 4.530 | 5.967 |
| 2.914 | 2.560 | 3.152 | 1.955 | 1.722 | 2.148 |
| 3.491 | 2.788 | 2.548 | 3.131 | 2.529 | 2.814 |
| 5.038 | 5.399 | 5.484 | 5.294 | 5.525 | 4.684 |
| 3.744 | 3.068 | 3.713 | 3.349 | 3.631 | 4.135 |
| 5.444 | 5.936 | 6.096 | 5.029 | 4.636 | 5.864 |
| 6.382 | 6.301 | 6.696 | 5.983 | 6.431 | 6.246 |
| 1.846 | 1.913 | 2.132 | 1.372 | 2.234 | 3.462 |
| 6.502 | 6.107 | 6.720 | 6.678 | 6.329 | 3.985 |
| 2.338 | 3.410 | 3.100 | 3.572 | 4.159 | 5.791 |
| 5.487 | 5.358 | 4.891 | 4.955 | 5.100 | 4.188 |
| 6.197 | 5.971 | 5.462 | 5.223 | 5.999 | 5.845 |
| 2.101 | 2.174 | 1.782 | 2.101 | 1.888 | 1.504 |
| 5.316 | 5.199 | 5.136 | 5.017 | 5.160 | 6.027 |
| 1.963 | 1.826 | 2.408 | 1.460 | 1.380 | 2.160 |
| 3.044 | 3.835 | 3.255 | 3.157 | 3.795 | 5.542 |
| 6.961 | 6.697 | 7.163 | 7.063 | 7.112 | 6.726 |
| 6.618 | 5.883 | 5.871 | 6.622 | 6.463 | 7.646 |
| 3.543 | 3.094 | 3.098 | 3.074 | 2.991 | 4.725 |
| 4.700 | 4.468 | 5.212 | 4.686 | 4.686 | 4.343 |
| 3.319 | 2.785 | 2.746 | 3.017 | 2.674 | 3.404 |
| 5.356 | 5.083 | 5.362 | 5.094 | 5.271 | 6.191 |
| 3.389 | 3.853 | 3.995 | 3.322 | 3.248 | 2.407 |
| 4.749 | 5.400 | 5.770 | 5.096 | 5.797 | 6.990 |
| 4.067 | 3.850 | 4.187 | 4.124 | 3.929 | 4.223 |
| 3.119 | 2.800 | 3.105 | 2.465 | 2.774 | 3.291 |
| 7.422 | 7.498 | 7.626 | 7.447 | 7.745 | 6.137 |
| 8.125 | 8.284 | 8.491 | 8.408 | 8.127 | 7.309 |
| 4.921 | 5.876 | 5.801 | 5.249 | 5.868 | 6.277 |
| 6.511 | 6.635 | 6.780 | 5.995 | 6.782 | 5.978 |
| 6.129 | 6.331 | 5.620 | 5.985 | 5.838 | 6.673 |
| 4.410 | 4.693 | 4.303 | 4.589 | 5.082 | 7.487 |
| 2.877 | 2.609 | 2.927 | 2.554 | 2.673 | 3.660 |

|       |       |       |       |       |       |
|-------|-------|-------|-------|-------|-------|
| 3.452 | 3.636 | 4.090 | 4.045 | 4.241 | 2.649 |
| 3.260 | 3.534 | 3.623 | 3.143 | 3.523 | 4.178 |
| 5.596 | 5.266 | 5.091 | 5.271 | 5.623 | 4.081 |
| 4.727 | 4.223 | 4.171 | 4.011 | 3.878 | 2.847 |
| 5.888 | 5.148 | 5.641 | 5.464 | 5.879 | 6.582 |
| 7.455 | 6.383 | 6.862 | 7.001 | 7.310 | 2.173 |
| 2.002 | 3.267 | 2.448 | 1.817 | 2.546 | 3.227 |
| 2.949 | 2.466 | 2.467 | 3.192 | 2.788 | 3.385 |
| 3.297 | 4.094 | 3.679 | 3.862 | 3.648 | 2.764 |
| 4.992 | 5.079 | 5.578 | 5.327 | 5.267 | 4.946 |
| 6.828 | 6.925 | 6.694 | 7.210 | 7.008 | 7.967 |
| 2.147 | 2.534 | 2.400 | 2.190 | 2.145 | 2.496 |
| 1.974 | 2.855 | 2.613 | 2.277 | 2.334 | 3.261 |
| 2.442 | 2.454 | 3.208 | 2.765 | 2.882 | 4.248 |
| 2.178 | 1.936 | 1.166 | 2.263 | 1.964 | 2.146 |
| 1.941 | 2.088 | 2.332 | 1.775 | 2.041 | 1.626 |
| 2.969 | 3.864 | 3.264 | 2.702 | 3.085 | 3.847 |
| 4.238 | 4.370 | 4.357 | 4.508 | 4.189 | 5.292 |
| 2.295 | 1.992 | 1.929 | 2.410 | 2.474 | 3.605 |
| 6.183 | 6.450 | 6.354 | 6.265 | 6.739 | 5.402 |
| 5.095 | 5.372 | 5.113 | 4.579 | 5.109 | 5.595 |
| 2.320 | 2.602 | 2.308 | 2.721 | 2.358 | 2.718 |
| 4.096 | 3.926 | 3.849 | 3.588 | 4.408 | 4.305 |
| 5.117 | 5.453 | 5.150 | 4.920 | 4.953 | 3.782 |
| 2.639 | 2.929 | 2.825 | 2.609 | 3.008 | 4.380 |
| 5.768 | 5.843 | 5.528 | 5.559 | 5.237 | 3.418 |
| 6.496 | 6.592 | 6.945 | 6.572 | 6.744 | 5.438 |
| 5.789 | 5.914 | 5.910 | 5.828 | 6.050 | 4.910 |
| 2.935 | 3.048 | 3.551 | 3.040 | 3.904 | 4.249 |
| 2.744 | 2.661 | 2.965 | 1.837 | 4.028 | 3.234 |
| 5.266 | 4.185 | 4.676 | 4.486 | 4.092 | 4.091 |
| 3.807 | 3.878 | 3.431 | 4.451 | 4.342 | 4.576 |
| 2.834 | 1.987 | 3.438 | 3.113 | 2.471 | 2.077 |
| 1.545 | 2.311 | 2.094 | 2.692 | 2.264 | 2.077 |
| 4.084 | 3.655 | 3.686 | 4.008 | 3.760 | 4.293 |
| 7.074 | 7.068 | 7.303 | 7.012 | 6.901 | 6.213 |
| 2.977 | 2.451 | 2.063 | 2.888 | 3.342 | 2.832 |
| 2.612 | 2.144 | 2.637 | 2.651 | 2.429 | 2.822 |
| 2.487 | 2.076 | 1.905 | 1.684 | 2.981 | 2.043 |
| 3.878 | 4.013 | 4.704 | 4.387 | 4.513 | 5.002 |
| 1.328 | 1.283 | 0.915 | 0.778 | 0.769 | 3.734 |
| 2.736 | 1.960 | 1.668 | 3.026 | 3.213 | 1.082 |
| 3.353 | 2.779 | 1.489 | 4.686 | 1.593 | 4.821 |
| 2.346 | 2.414 | 3.034 | 2.626 | 2.794 | 2.583 |
| 2.992 | 3.056 | 2.327 | 3.327 | 3.145 | 4.218 |
| 3.109 | 2.222 | 2.150 | 3.638 | 3.132 | 3.566 |
| 2.463 | 2.691 | 3.411 | 2.677 | 2.739 | 1.405 |
| 1.932 | 2.166 | 2.591 | 2.534 | 2.565 | 3.491 |
| 5.966 | 6.227 | 5.613 | 5.991 | 6.199 | 3.910 |
| 2.674 | 2.442 | 3.055 | 2.045 | 2.870 | 1.146 |

|       |       |       |       |       |       |
|-------|-------|-------|-------|-------|-------|
| 2.201 | 1.955 | 1.530 | 2.047 | 2.364 | 3.121 |
| 2.925 | 1.567 | 3.209 | 2.748 | 2.564 | 1.300 |
| 5.561 | 5.911 | 5.918 | 6.073 | 5.943 | 5.864 |
| 3.207 | 2.882 | 3.106 | 3.156 | 2.981 | 3.987 |
| 3.455 | 3.491 | 3.988 | 4.511 | 4.696 | 4.351 |
| 3.957 | 4.211 | 3.670 | 3.865 | 4.142 | 4.620 |
| 3.495 | 2.949 | 3.095 | 3.579 | 2.590 | 1.995 |
| 3.594 | 3.468 | 4.361 | 4.100 | 3.251 | 4.250 |
| 2.490 | 2.656 | 3.127 | 3.887 | 3.094 | 3.588 |
| 2.293 | 1.867 | 2.936 | 1.950 | 2.101 | 3.099 |
| 4.923 | 2.486 | 2.645 | 4.727 | 2.698 | 1.833 |
| 3.114 | 2.812 | 3.165 | 3.387 | 3.695 | 3.119 |
| 5.021 | 4.819 | 5.658 | 5.006 | 5.277 | 1.242 |
| 3.782 | 3.111 | 3.736 | 4.051 | 3.503 | 3.798 |
| 2.248 | 2.398 | 2.888 | 2.697 | 1.811 | 2.562 |
| 2.974 | 3.010 | 2.825 | 3.475 | 3.548 | 2.915 |
| 3.531 | 3.395 | 3.494 | 3.775 | 3.896 | 2.518 |
| 5.804 | 6.178 | 6.110 | 5.458 | 5.406 | 4.097 |
| 5.083 | 5.280 | 4.499 | 5.281 | 4.217 | 2.522 |
| 5.007 | 4.697 | 5.044 | 5.304 | 4.734 | 3.516 |
| 2.939 | 3.580 | 3.946 | 4.548 | 4.410 | 6.109 |
| 2.253 | 2.334 | 2.487 | 3.102 | 3.330 | 5.083 |
| 3.938 | 3.443 | 2.754 | 3.115 | 2.961 | 1.898 |
| 4.061 | 3.688 | 3.170 | 4.033 | 3.822 | 2.070 |
| 6.485 | 6.293 | 6.190 | 6.756 | 6.065 | 2.799 |
| 5.869 | 6.316 | 6.224 | 6.321 | 6.122 | 5.702 |
| 6.987 | 5.739 | 6.254 | 6.832 | 5.995 | 6.272 |
| 1.726 | 1.436 | 1.334 | 2.591 | 2.401 | 2.299 |
| 2.224 | 2.903 | 3.042 | 2.834 | 3.703 | 5.393 |
| 7.875 | 7.882 | 7.775 | 7.819 | 7.611 | 7.034 |
| 2.477 | 3.292 | 3.260 | 3.155 | 3.367 | 2.588 |
| 3.717 | 3.852 | 4.142 | 4.352 | 4.199 | 4.036 |
| 3.427 | 3.656 | 3.373 | 3.505 | 3.244 | 3.481 |
| 5.275 | 5.524 | 5.497 | 5.589 | 5.789 | 4.552 |
| 2.516 | 2.063 | 1.744 | 1.348 | 2.008 | 2.304 |
| 1.845 | 1.620 | 1.799 | 2.498 | 2.262 | 3.097 |
| 4.251 | 4.317 | 3.368 | 4.141 | 4.521 | 5.334 |
| 2.880 | 2.206 | 2.321 | 3.311 | 2.477 | 5.081 |
| 4.245 | 4.548 | 4.863 | 3.740 | 4.028 | 2.661 |
| 3.826 | 3.059 | 3.355 | 3.339 | 2.780 | 4.278 |
| 2.303 | 2.169 | 1.886 | 2.340 | 2.407 | 2.778 |
| 1.634 | 2.057 | 2.043 | 2.470 | 2.213 | 2.818 |
| 4.704 | 4.563 | 4.395 | 4.952 | 4.325 | 4.700 |
| 5.116 | 4.500 | 4.923 | 5.143 | 4.834 | 5.439 |
| 4.125 | 4.145 | 4.405 | 4.112 | 4.110 | 3.210 |
| 1.949 | 1.848 | 1.965 | 1.790 | 1.805 | 2.464 |
| 7.296 | 6.883 | 7.164 | 7.134 | 6.855 | 6.933 |
| 4.188 | 4.850 | 4.444 | 4.924 | 4.208 | 3.929 |
| 5.505 | 5.854 | 6.123 | 5.518 | 5.924 | 4.036 |
| 3.311 | 3.175 | 3.474 | 3.799 | 3.179 | 3.717 |

|       |       |       |       |       |       |
|-------|-------|-------|-------|-------|-------|
| 2.039 | 2.246 | 2.635 | 2.704 | 2.153 | 3.555 |
| 2.315 | 2.040 | 2.190 | 1.477 | 1.886 | 4.425 |
| 4.779 | 4.557 | 5.516 | 5.002 | 5.432 | 2.792 |
| 5.798 | 5.925 | 5.516 | 5.344 | 5.457 | 4.891 |
| 2.581 | 2.756 | 3.142 | 2.771 | 2.207 | 1.684 |
| 5.549 | 5.084 | 5.595 | 5.502 | 5.432 | 5.488 |
| 4.748 | 4.930 | 4.485 | 4.938 | 4.528 | 4.861 |
| 3.354 | 3.851 | 3.673 | 3.502 | 3.650 | 3.992 |
| 4.684 | 4.236 | 5.237 | 5.739 | 4.278 | 5.897 |
| 4.610 | 4.415 | 4.788 | 4.579 | 5.115 | 3.124 |
| 5.753 | 5.650 | 5.825 | 5.630 | 5.579 | 4.990 |
| 3.761 | 4.414 | 4.190 | 4.972 | 4.460 | 4.864 |
| 4.591 | 4.383 | 4.755 | 4.316 | 4.590 | 4.611 |
| 4.303 | 4.351 | 4.364 | 4.713 | 4.476 | 5.500 |
| 6.732 | 6.527 | 6.219 | 6.809 | 6.803 | 7.206 |
| 6.357 | 6.273 | 6.309 | 6.554 | 6.486 | 6.519 |
| 6.553 | 6.369 | 6.083 | 6.680 | 6.675 | 6.849 |
| 6.679 | 6.608 | 6.181 | 6.800 | 6.740 | 7.257 |
| 5.046 | 4.871 | 4.532 | 4.613 | 4.673 | 4.070 |
| 4.572 | 4.820 | 5.683 | 3.615 | 4.835 | 1.469 |
| 3.328 | 3.640 | 3.852 | 3.284 | 4.110 | 2.383 |
| 1.998 | 2.293 | 2.657 | 1.942 | 2.508 | 3.487 |
| 2.522 | 3.054 | 3.454 | 1.600 | 2.338 | 2.740 |
| 3.866 | 3.399 | 4.357 | 4.009 | 4.128 | 5.767 |
| 6.415 | 6.230 | 5.916 | 6.495 | 6.524 | 6.946 |
| 3.360 | 3.680 | 4.026 | 3.477 | 3.572 | 4.245 |
| 2.817 | 1.339 | 1.512 | 2.186 | 1.977 | 6.180 |
| 6.102 | 4.999 | 5.274 | 5.035 | 5.019 | 6.721 |
| 4.629 | 4.586 | 4.888 | 4.600 | 4.896 | 4.669 |
| 5.071 | 5.435 | 5.439 | 5.792 | 5.992 | 7.329 |
| 6.100 | 5.920 | 5.888 | 5.787 | 5.948 | 3.949 |
| 4.235 | 3.498 | 4.537 | 4.393 | 3.964 | 2.275 |
| 7.417 | 6.490 | 7.203 | 7.379 | 7.056 | 4.606 |
| 3.242 | 3.356 | 2.826 | 3.146 | 3.404 | 3.405 |
| 4.507 | 4.312 | 4.591 | 4.758 | 4.963 | 3.415 |
| 2.000 | 2.524 | 1.800 | 1.743 | 2.190 | 3.536 |
| 2.922 | 2.997 | 3.362 | 2.707 | 3.719 | 3.011 |
| 2.911 | 2.660 | 3.130 | 3.767 | 2.871 | 3.638 |
| 2.865 | 2.647 | 1.537 | 3.581 | 2.685 | 2.126 |
| 4.790 | 4.365 | 4.819 | 4.916 | 4.709 | 4.690 |
| 3.756 | 4.270 | 4.113 | 4.609 | 3.957 | 4.431 |
| 1.776 | 2.047 | 2.453 | 2.177 | 2.015 | 3.489 |
| 4.333 | 3.742 | 3.667 | 3.966 | 3.423 | 1.370 |
| 1.932 | 1.892 | 2.129 | 1.857 | 2.835 | 2.562 |
| 4.097 | 3.971 | 3.827 | 4.277 | 4.151 | 2.583 |
| 3.567 | 1.632 | 3.006 | 3.885 | 3.165 | 1.787 |
| 4.979 | 4.841 | 5.198 | 5.094 | 4.710 | 3.907 |
| 1.844 | 2.588 | 2.276 | 2.285 | 1.762 | 1.994 |
| 2.024 | 2.349 | 2.577 | 3.147 | 2.594 | 2.712 |
| 2.639 | 3.076 | 3.772 | 3.803 | 3.780 | 4.745 |



|       |       |       |       |       |       |
|-------|-------|-------|-------|-------|-------|
| 3.788 | 1.707 | 2.435 | 1.710 | 2.821 | 1.251 |
| 3.248 | 3.522 | 3.108 | 3.026 | 3.400 | 3.728 |
| 4.181 | 1.595 | 3.769 | 3.912 | 2.644 | 5.427 |
| 3.671 | 3.135 | 3.831 | 3.823 | 3.674 | 3.048 |
| 6.192 | 3.576 | 4.835 | 4.656 | 4.532 | 5.328 |
| 5.166 | 4.704 | 5.180 | 5.406 | 5.082 | 5.918 |
| 1.865 | 2.323 | 1.673 | 3.265 | 2.572 | 3.037 |
| 1.015 | 0.757 | 1.351 | 1.017 | 1.139 | 5.118 |
| 3.212 | 3.978 | 2.979 | 3.886 | 3.854 | 4.284 |
| 6.879 | 5.639 | 5.527 | 6.175 | 5.890 | 5.790 |
| 6.187 | 4.957 | 5.282 | 6.316 | 5.553 | 4.876 |
| 2.521 | 2.563 | 3.578 | 3.858 | 1.855 | 1.075 |
| 4.803 | 3.769 | 5.460 | 5.044 | 5.008 | 0.857 |
| 4.620 | 4.241 | 5.156 | 4.290 | 5.122 | 3.505 |
| 6.790 | 5.821 | 6.331 | 6.219 | 6.151 | 3.862 |
| 1.542 | 1.700 | 1.303 | 1.773 | 2.013 | 3.093 |
| 6.340 | 6.560 | 6.608 | 6.602 | 6.783 | 7.600 |
| 4.545 | 4.397 | 4.701 | 4.743 | 5.296 | 6.636 |
| 2.178 | 2.261 | 2.174 | 2.867 | 2.166 | 3.196 |
| 5.980 | 5.814 | 5.591 | 5.490 | 5.987 | 7.346 |
| 6.595 | 6.792 | 6.750 | 7.120 | 6.664 | 8.227 |
| 2.617 | 3.184 | 3.651 | 2.290 | 2.455 | 2.193 |
| 5.908 | 5.817 | 5.984 | 5.774 | 6.128 | 7.575 |
| 3.208 | 2.999 | 2.689 | 3.201 | 3.461 | 3.473 |
| 1.701 | 1.379 | 1.523 | 1.975 | 1.570 | 2.604 |
| 7.452 | 7.566 | 7.380 | 7.369 | 7.572 | 6.939 |
| 8.237 | 8.282 | 8.241 | 8.140 | 8.145 | 6.795 |
| 3.825 | 4.134 | 3.811 | 3.550 | 4.265 | 5.475 |
| 5.843 | 5.399 | 5.814 | 5.671 | 5.668 | 5.614 |
| 3.980 | 3.972 | 3.738 | 3.845 | 4.189 | 4.598 |
| 4.610 | 3.960 | 4.214 | 4.345 | 4.445 | 3.522 |
| 6.371 | 6.027 | 6.349 | 6.189 | 6.194 | 4.754 |
| 7.252 | 7.528 | 7.331 | 7.206 | 7.289 | 4.828 |
| 6.079 | 5.659 | 5.909 | 6.046 | 5.905 | 4.154 |
| 3.638 | 3.710 | 4.292 | 3.197 | 4.322 | 2.891 |
| 2.767 | 3.023 | 3.339 | 3.009 | 3.676 | 3.218 |
| 7.953 | 8.303 | 8.108 | 7.899 | 7.992 | 5.866 |
| 6.328 | 6.210 | 6.356 | 5.895 | 6.092 | 4.251 |
| 2.248 | 2.305 | 2.270 | 3.094 | 2.354 | 2.267 |
| 5.825 | 6.415 | 6.202 | 6.209 | 6.247 | 4.673 |
| 6.020 | 6.040 | 6.408 | 6.009 | 6.241 | 3.502 |
| 4.086 | 3.978 | 4.547 | 3.852 | 4.315 | 2.858 |
| 1.498 | 2.081 | 1.435 | 2.321 | 2.319 | 2.360 |
| 3.561 | 3.434 | 2.804 | 3.344 | 2.983 | 3.716 |
| 3.693 | 3.644 | 3.353 | 1.584 | 3.662 | 1.508 |
| 3.509 | 3.578 | 3.355 | 3.944 | 4.042 | 4.482 |
| 3.156 | 3.878 | 3.053 | 3.242 | 2.064 | 3.041 |
| 2.082 | 1.681 | 2.371 | 1.697 | 2.395 | 2.374 |
| 2.748 | 1.895 | 1.479 | 2.846 | 2.256 | 2.709 |
| 5.139 | 4.199 | 3.569 | 4.728 | 4.080 | 5.440 |

|       |       |       |       |       |       |
|-------|-------|-------|-------|-------|-------|
| 2.263 | 3.387 | 2.826 | 3.057 | 3.423 | 1.445 |
| 3.018 | 4.151 | 3.240 | 2.805 | 3.727 | 4.097 |
| 1.406 | 2.237 | 1.169 | 1.730 | 2.539 | 2.962 |
| 2.739 | 2.848 | 2.950 | 2.893 | 3.076 | 3.176 |
| 3.283 | 3.445 | 3.212 | 3.665 | 3.808 | 4.503 |
| 1.684 | 2.567 | 2.149 | 1.825 | 2.254 | 2.486 |
| 2.409 | 2.729 | 2.790 | 2.630 | 2.402 | 2.484 |
| 4.432 | 2.905 | 2.289 | 3.154 | 3.505 | 1.705 |
| 5.272 | 5.032 | 5.797 | 5.381 | 5.577 | 5.300 |
| 2.935 | 4.329 | 4.374 | 3.864 | 3.805 | 4.853 |
| 1.767 | 1.477 | 1.092 | 1.290 | 1.203 | 1.984 |
| 2.192 | 2.890 | 2.119 | 2.958 | 3.126 | 4.082 |
| 2.749 | 3.092 | 3.493 | 3.396 | 3.608 | 3.791 |
| 4.095 | 3.316 | 4.301 | 4.048 | 3.567 | 3.378 |
| 2.043 | 3.296 | 3.296 | 2.957 | 2.509 | 3.928 |
| 4.696 | 5.567 | 5.274 | 5.105 | 5.142 | 5.130 |
| 2.677 | 2.814 | 2.725 | 3.069 | 2.846 | 2.437 |
| 2.498 | 2.461 | 2.301 | 1.884 | 2.590 | 2.484 |
| 4.702 | 4.728 | 3.650 | 4.076 | 4.653 | 3.276 |
| 2.879 | 3.862 | 3.811 | 3.143 | 3.801 | 1.972 |
| 3.572 | 4.047 | 3.873 | 3.443 | 3.906 | 3.042 |
| 3.360 | 4.293 | 3.780 | 3.669 | 3.181 | 2.096 |
| 4.334 | 3.638 | 2.739 | 4.391 | 3.766 | 3.118 |
| 3.064 | 2.409 | 3.161 | 3.627 | 3.741 | 1.804 |
| 2.307 | 1.970 | 2.430 | 2.544 | 1.990 | 2.476 |
| 3.905 | 4.196 | 4.369 | 4.042 | 3.744 | 3.464 |
| 1.276 | 1.557 | 1.777 | 1.794 | 1.670 | 2.383 |
| 1.948 | 2.285 | 2.070 | 2.951 | 2.983 | 3.091 |
| 3.003 | 2.749 | 3.087 | 3.269 | 3.193 | 4.345 |
| 3.841 | 3.623 | 4.258 | 4.147 | 4.633 | 4.649 |
| 4.126 | 3.680 | 4.367 | 3.694 | 3.704 | 2.350 |
| 2.755 | 2.235 | 2.136 | 1.943 | 2.931 | 3.098 |
| 3.925 | 4.186 | 2.777 | 4.497 | 4.041 | 3.835 |
| 3.831 | 3.321 | 3.490 | 3.367 | 3.887 | 3.092 |
| 3.437 | 2.547 | 4.263 | 3.586 | 4.082 | 4.199 |
| 3.572 | 3.225 | 4.191 | 2.898 | 3.649 | 3.883 |
| 2.850 | 2.893 | 2.827 | 2.560 | 3.348 | 1.756 |
| 2.958 | 3.261 | 2.211 | 3.802 | 3.339 | 4.794 |
| 4.125 | 4.479 | 3.706 | 4.890 | 4.256 | 6.133 |
| 2.475 | 2.536 | 2.642 | 2.894 | 3.193 | 2.605 |
| 4.649 | 4.156 | 4.058 | 4.506 | 4.097 | 3.696 |
| 3.688 | 2.825 | 3.096 | 4.062 | 3.461 | 2.693 |
| 7.461 | 7.501 | 6.729 | 7.748 | 7.523 | 8.001 |
| 2.547 | 3.522 | 3.737 | 3.590 | 4.142 | 2.606 |
| 2.887 | 2.064 | 2.573 | 2.748 | 3.184 | 2.122 |
| 4.964 | 5.325 | 5.105 | 4.696 | 4.894 | 4.674 |
| 2.805 | 3.388 | 3.218 | 3.221 | 2.906 | 3.081 |
| 3.513 | 3.638 | 3.504 | 3.715 | 4.635 | 4.084 |
| 3.042 | 2.767 | 2.986 | 2.270 | 3.335 | 1.445 |
| 2.123 | 2.335 | 2.004 | 2.016 | 1.551 | 2.181 |

|       |       |       |       |       |       |
|-------|-------|-------|-------|-------|-------|
| 3.276 | 3.220 | 2.868 | 3.510 | 2.578 | 4.413 |
| 3.999 | 3.192 | 3.751 | 4.359 | 3.901 | 3.201 |
| 5.292 | 5.484 | 4.706 | 5.612 | 5.149 | 5.902 |
| 1.754 | 1.929 | 2.853 | 1.967 | 1.828 | 1.962 |
| 4.630 | 4.230 | 4.644 | 4.679 | 4.168 | 2.757 |
| 5.233 | 4.589 | 5.121 | 4.426 | 4.482 | 5.374 |
| 7.797 | 7.530 | 6.941 | 8.201 | 7.779 | 8.899 |
| 7.796 | 7.409 | 6.861 | 8.120 | 7.732 | 8.869 |
| 4.760 | 3.067 | 5.312 | 5.566 | 3.615 | 6.046 |
| 3.813 | 3.371 | 3.317 | 4.018 | 3.663 | 4.557 |
| 4.653 | 4.723 | 4.056 | 5.405 | 4.818 | 5.735 |
| 4.703 | 4.651 | 4.140 | 5.372 | 5.015 | 5.361 |
| 4.431 | 4.659 | 4.054 | 5.310 | 4.300 | 5.576 |
| 5.785 | 5.625 | 5.161 | 6.511 | 5.584 | 7.081 |
| 4.023 | 4.023 | 3.472 | 4.793 | 4.131 | 5.162 |
| 3.998 | 4.118 | 4.723 | 4.487 | 3.947 | 4.673 |
| 2.931 | 2.915 | 3.363 | 2.918 | 3.120 | 1.645 |
| 2.887 | 3.660 | 3.653 | 3.826 | 4.204 | 5.051 |
| 5.697 | 5.477 | 5.281 | 5.618 | 5.686 | 5.328 |
| 3.047 | 4.205 | 4.043 | 3.742 | 3.938 | 3.371 |
| 9.023 | 8.147 | 8.179 | 9.530 | 8.383 | 9.122 |
| 4.510 | 5.121 | 4.643 | 4.615 | 4.851 | 4.824 |
| 4.757 | 3.834 | 3.979 | 4.474 | 4.149 | 3.929 |
| 3.594 | 3.236 | 2.800 | 3.541 | 3.330 | 3.897 |
| 4.921 | 4.457 | 4.822 | 4.936 | 4.660 | 4.615 |
| 4.026 | 3.993 | 3.913 | 4.225 | 4.239 | 3.332 |
| 2.895 | 2.713 | 3.586 | 2.711 | 3.791 | 3.397 |
| 4.484 | 4.713 | 5.022 | 4.505 | 4.696 | 2.893 |
| 4.223 | 3.738 | 4.314 | 3.573 | 4.076 | 3.954 |
| 4.948 | 4.507 | 3.660 | 4.739 | 4.523 | 4.539 |
| 3.194 | 4.570 | 3.590 | 3.605 | 4.240 | 3.535 |
| 3.007 | 3.641 | 2.541 | 3.060 | 2.640 | 3.683 |
| 3.493 | 3.674 | 3.298 | 3.816 | 3.437 | 3.128 |
| 4.757 | 5.257 | 5.646 | 4.871 | 5.391 | 4.852 |
| 3.130 | 3.551 | 3.275 | 2.928 | 3.164 | 2.245 |
| 1.839 | 2.458 | 2.195 | 1.870 | 3.016 | 2.230 |
| 2.275 | 2.274 | 2.040 | 1.847 | 1.519 | 3.208 |
| 1.948 | 2.644 | 1.814 | 1.784 | 1.881 | 1.953 |
| 0.990 | 2.202 | 2.581 | 1.629 | 1.771 | 2.200 |
| 3.133 | 2.874 | 2.291 | 2.319 | 3.478 | 5.981 |
| 2.637 | 1.710 | 2.260 | 3.273 | 2.530 | 2.722 |
| 4.309 | 3.096 | 4.175 | 3.806 | 3.912 | 3.751 |
| 1.876 | 1.803 | 2.173 | 2.456 | 2.415 | 3.002 |
| 4.007 | 4.174 | 3.954 | 4.459 | 4.312 | 4.542 |
| 1.604 | 1.900 | 1.529 | 2.196 | 2.680 | 3.415 |
| 1.552 | 2.783 | 1.994 | 3.183 | 2.288 | 2.861 |
| 1.985 | 1.772 | 1.986 | 1.669 | 2.239 | 2.302 |
| 3.516 | 2.636 | 2.788 | 3.040 | 3.641 | 3.297 |
| 4.556 | 4.130 | 4.360 | 4.547 | 4.240 | 3.127 |
| 2.977 | 2.126 | 2.353 | 2.890 | 2.423 | 2.641 |

|       |       |       |       |       |       |
|-------|-------|-------|-------|-------|-------|
| 3.652 | 3.447 | 3.313 | 3.313 | 4.062 | 4.416 |
| 4.189 | 2.822 | 2.989 | 1.949 | 3.049 | 2.983 |
| 2.728 | 3.316 | 3.459 | 3.388 | 3.689 | 4.610 |
| 4.318 | 3.896 | 3.341 | 4.041 | 4.073 | 4.511 |
| 3.370 | 3.310 | 2.821 | 3.665 | 3.583 | 4.499 |
| 3.490 | 3.444 | 3.870 | 3.618 | 3.599 | 5.243 |
| 3.811 | 4.397 | 4.892 | 4.363 | 4.419 | 2.420 |
| 2.592 | 2.873 | 2.700 | 2.972 | 3.620 | 3.792 |
| 3.455 | 2.235 | 2.707 | 3.549 | 2.468 | 3.602 |
| 2.656 | 2.048 | 2.182 | 2.226 | 2.680 | 2.161 |
| 2.825 | 2.706 | 3.027 | 3.394 | 3.097 | 3.347 |
| 3.351 | 2.608 | 3.890 | 2.982 | 3.411 | 3.717 |
| 1.959 | 3.185 | 2.545 | 3.434 | 3.201 | 2.405 |
| 1.415 | 2.265 | 2.577 | 2.070 | 2.406 | 1.860 |
| 5.365 | 5.242 | 5.494 | 5.901 | 5.514 | 4.925 |
| 4.982 | 4.640 | 4.754 | 5.076 | 4.990 | 5.732 |
| 5.465 | 5.525 | 5.318 | 5.538 | 5.208 | 6.299 |
| 2.606 | 2.449 | 2.502 | 2.992 | 2.893 | 3.937 |
| 5.221 | 4.727 | 5.271 | 5.097 | 5.159 | 1.860 |
| 5.740 | 5.271 | 6.011 | 5.756 | 5.542 | 5.743 |
| 2.922 | 1.987 | 3.485 | 2.001 | 2.177 | 2.417 |
| 3.362 | 3.317 | 2.693 | 3.001 | 3.146 | 3.314 |
| 4.153 | 3.515 | 3.653 | 3.699 | 3.684 | 4.878 |
| 2.137 | 1.797 | 2.018 | 1.851 | 1.757 | 1.696 |
| 2.632 | 3.168 | 2.878 | 3.664 | 3.385 | 4.011 |
| 1.372 | 1.309 | 2.277 | 1.002 | 1.255 | 2.571 |
| 2.774 | 3.107 | 3.104 | 2.315 | 2.954 | 3.806 |
| 2.937 | 3.125 | 3.106 | 3.047 | 3.582 | 3.949 |
| 1.986 | 2.909 | 2.251 | 2.640 | 1.773 | 6.258 |
| 4.906 | 5.187 | 5.538 | 5.475 | 5.247 | 2.904 |
| 4.100 | 4.723 | 4.405 | 3.816 | 4.338 | 3.891 |
| 3.596 | 2.928 | 3.501 | 3.272 | 3.730 | 3.062 |
| 1.887 | 2.430 | 2.042 | 3.507 | 2.677 | 2.670 |
| 5.082 | 4.538 | 4.498 | 3.776 | 4.569 | 3.370 |
| 3.274 | 1.726 | 2.491 | 3.425 | 3.546 | 3.509 |
| 3.413 | 3.648 | 3.361 | 3.692 | 3.361 | 4.575 |
| 4.445 | 3.493 | 3.412 | 4.681 | 3.367 | 4.422 |
| 1.789 | 3.170 | 2.432 | 2.365 | 2.692 | 1.547 |
| 2.801 | 2.361 | 3.257 | 3.293 | 3.225 | 3.222 |
| 2.162 | 1.870 | 2.855 | 2.666 | 2.188 | 3.156 |
| 1.984 | 2.386 | 2.628 | 2.882 | 2.553 | 2.935 |
| 5.774 | 5.529 | 5.861 | 6.078 | 5.535 | 6.568 |
| 4.803 | 5.556 | 5.688 | 5.203 | 5.803 | 4.033 |
| 1.506 | 1.365 | 2.373 | 1.938 | 1.772 | 1.584 |
| 3.890 | 3.445 | 3.569 | 3.651 | 3.527 | 5.179 |
| 5.641 | 5.039 | 5.571 | 5.632 | 5.337 | 3.767 |
| 3.211 | 4.156 | 4.147 | 4.127 | 4.606 | 3.634 |
| 1.462 | 3.197 | 1.942 | 2.552 | 2.256 | 2.361 |
| 2.804 | 2.759 | 3.091 | 2.665 | 2.672 | 3.713 |
| 3.656 | 3.049 | 3.461 | 3.049 | 3.052 | 2.473 |

|       |       |       |       |       |       |
|-------|-------|-------|-------|-------|-------|
| 2.462 | 2.467 | 0.896 | 2.658 | 2.875 | 2.643 |
| 3.619 | 3.845 | 4.202 | 3.251 | 3.391 | 4.888 |
| 3.186 | 3.578 | 3.218 | 3.330 | 1.708 | 3.282 |
| 3.050 | 3.023 | 2.835 | 2.890 | 3.199 | 4.164 |
| 3.365 | 3.175 | 2.492 | 3.020 | 3.495 | 4.044 |
| 2.601 | 3.273 | 2.937 | 2.475 | 2.786 | 2.871 |
| 6.431 | 6.737 | 6.905 | 6.695 | 6.332 | 3.945 |
| 6.023 | 6.326 | 6.086 | 6.172 | 5.887 | 3.481 |
| 3.446 | 3.817 | 3.025 | 3.300 | 4.018 | 4.646 |
| 5.691 | 5.575 | 5.432 | 4.987 | 5.718 | 4.643 |
| 4.396 | 4.014 | 4.845 | 4.591 | 4.194 | 4.905 |
| 7.568 | 7.485 | 6.723 | 7.943 | 7.410 | 8.538 |
| 2.138 | 2.843 | 2.379 | 2.096 | 2.640 | 2.795 |
| 4.731 | 4.657 | 3.227 | 4.606 | 4.332 | 5.317 |
| 1.516 | 2.462 | 2.199 | 2.260 | 2.192 | 3.491 |
| 3.835 | 2.687 | 3.119 | 4.379 | 2.126 | 2.846 |
| 3.569 | 2.552 | 3.338 | 4.381 | 3.742 | 5.869 |
| 2.147 | 2.330 | 2.869 | 2.066 | 2.747 | 2.794 |
| 3.034 | 2.719 | 2.728 | 2.848 | 2.848 | 1.922 |
| 1.507 | 2.759 | 1.919 | 1.755 | 2.169 | 2.781 |
| 2.396 | 3.166 | 2.539 | 2.951 | 2.580 | 3.625 |
| 5.233 | 4.501 | 4.627 | 4.724 | 4.069 | 4.179 |
| 3.850 | 3.097 | 3.812 | 3.875 | 3.195 | 3.358 |
| 4.334 | 3.541 | 3.541 | 4.064 | 3.918 | 3.960 |
| 3.538 | 3.381 | 3.950 | 3.639 | 3.821 | 4.441 |
| 3.414 | 2.497 | 3.062 | 2.591 | 2.574 | 4.731 |
| 1.835 | 1.577 | 1.440 | 1.765 | 2.108 | 2.204 |
| 3.477 | 3.315 | 3.518 | 4.147 | 4.256 | 4.587 |
| 6.258 | 6.110 | 5.483 | 6.937 | 6.157 | 6.580 |
| 4.181 | 4.004 | 4.914 | 4.451 | 3.956 | 2.135 |
| 2.977 | 2.044 | 2.875 | 2.236 | 2.372 | 1.690 |
| 3.709 | 2.506 | 3.344 | 2.953 | 3.130 | 3.471 |
| 3.345 | 3.342 | 3.510 | 3.900 | 3.883 | 4.772 |
| 3.167 | 2.280 | 3.105 | 3.117 | 3.150 | 3.997 |
| 4.722 | 4.805 | 4.901 | 5.369 | 5.233 | 4.946 |
| 1.517 | 2.129 | 2.016 | 2.744 | 2.753 | 4.356 |
| 2.739 | 2.818 | 3.362 | 3.486 | 2.605 | 0.752 |
| 6.082 | 5.159 | 4.986 | 5.776 | 5.148 | 6.835 |
| 2.880 | 4.209 | 3.719 | 3.425 | 3.382 | 2.526 |
| 2.358 | 1.903 | 2.264 | 1.924 | 2.354 | 1.998 |
| 4.502 | 1.478 | 3.531 | 3.758 | 2.264 | 1.275 |
| 3.006 | 3.471 | 3.863 | 2.993 | 2.709 | 4.043 |
| 2.641 | 3.468 | 2.396 | 2.856 | 3.062 | 2.810 |
| 5.403 | 5.802 | 4.893 | 4.789 | 5.275 | 4.846 |
| 4.905 | 3.307 | 3.919 | 4.177 | 3.697 | 1.926 |
| 3.703 | 3.668 | 3.438 | 3.555 | 3.351 | 2.823 |
| 1.743 | 2.988 | 2.884 | 2.583 | 2.756 | 3.720 |
| 4.811 | 4.572 | 4.092 | 4.732 | 4.703 | 5.822 |
| 6.683 | 6.421 | 6.650 | 6.537 | 6.696 | 5.032 |
| 4.139 | 4.605 | 5.022 | 3.916 | 4.601 | 1.548 |

|       |       |       |       |       |       |
|-------|-------|-------|-------|-------|-------|
| 2.609 | 3.551 | 3.102 | 2.638 | 2.925 | 3.313 |
| 2.093 | 1.945 | 2.736 | 1.991 | 2.192 | 2.657 |
| 2.490 | 1.810 | 2.960 | 2.497 | 3.513 | 0.949 |
| 3.519 | 1.810 | 2.713 | 3.490 | 2.030 | 2.296 |
| 3.122 | 3.369 | 2.601 | 3.244 | 2.922 | 3.785 |
| 2.794 | 2.548 | 2.156 | 2.260 | 2.306 | 2.011 |
| 2.503 | 2.676 | 3.036 | 2.622 | 3.014 | 3.036 |
| 3.877 | 3.694 | 3.487 | 4.173 | 4.120 | 4.195 |
| 2.113 | 2.238 | 2.414 | 2.740 | 2.373 | 3.846 |
| 4.661 | 4.992 | 4.168 | 4.838 | 4.375 | 5.250 |
| 1.727 | 1.807 | 1.612 | 2.214 | 2.487 | 3.033 |
| 3.146 | 2.379 | 2.554 | 2.340 | 3.458 | 1.831 |
| 2.036 | 1.496 | 2.239 | 2.466 | 1.848 | 3.067 |
| 3.048 | 2.847 | 2.162 | 1.535 | 2.311 | 1.711 |
| 2.124 | 1.808 | 3.102 | 3.165 | 1.501 | 1.467 |
| 2.523 | 2.789 | 3.007 | 2.511 | 2.797 | 3.086 |
| 3.843 | 2.720 | 3.300 | 4.281 | 4.493 | 6.239 |
| 1.979 | 2.814 | 3.042 | 2.067 | 2.358 | 2.275 |
| 3.203 | 3.446 | 2.816 | 2.522 | 2.733 | 1.752 |
| 1.477 | 0.942 | 1.734 | 2.277 | 1.439 | 2.045 |
| 3.788 | 3.643 | 3.111 | 3.463 | 2.953 | 4.067 |
| 2.359 | 2.566 | 2.436 | 3.054 | 2.538 | 1.813 |
| 3.263 | 2.180 | 3.069 | 2.993 | 3.831 | 2.959 |
| 2.054 | 2.434 | 2.279 | 1.989 | 2.476 | 2.760 |
| 3.319 | 4.408 | 4.312 | 4.521 | 4.869 | 1.972 |
| 2.340 | 3.082 | 2.987 | 2.873 | 3.343 | 3.863 |
| 2.635 | 3.460 | 3.540 | 3.444 | 3.694 | 1.224 |
| 5.838 | 6.409 | 5.498 | 6.684 | 5.953 | 6.776 |
| 3.151 | 3.842 | 3.741 | 3.645 | 3.179 | 3.590 |
| 3.275 | 3.245 | 4.220 | 4.594 | 3.377 | 2.593 |
| 2.839 | 2.989 | 2.830 | 2.716 | 2.471 | 4.155 |
| 3.809 | 4.307 | 4.262 | 4.365 | 4.387 | 4.154 |
| 3.922 | 3.597 | 3.233 | 3.676 | 2.610 | 2.730 |
| 2.623 | 3.008 | 3.194 | 3.278 | 2.889 | 4.186 |
| 2.240 | 3.126 | 2.266 | 2.113 | 2.544 | 2.626 |
| 2.969 | 3.143 | 3.454 | 3.329 | 3.450 | 3.990 |
| 3.715 | 3.668 | 3.748 | 4.052 | 3.646 | 4.392 |
| 2.013 | 1.342 | 1.403 | 2.197 | 1.747 | 2.237 |
| 2.506 | 3.111 | 3.031 | 2.333 | 2.969 | 3.107 |
| 1.593 | 1.920 | 1.582 | 1.771 | 2.133 | 2.180 |
| 3.082 | 3.449 | 2.409 | 2.859 | 2.428 | 1.601 |
| 3.417 | 1.277 | 2.128 | 2.752 | 3.015 | 1.503 |
| 3.667 | 4.404 | 4.800 | 4.637 | 4.193 | 4.857 |
| 5.414 | 5.601 | 4.919 | 6.044 | 5.464 | 5.878 |
| 5.462 | 5.730 | 4.954 | 6.051 | 5.403 | 6.043 |
| 6.651 | 6.690 | 6.230 | 7.125 | 6.775 | 7.445 |
| 4.312 | 4.964 | 5.502 | 4.697 | 4.772 | 5.075 |
| 2.272 | 2.959 | 2.573 | 3.096 | 3.232 | 1.683 |
| 2.787 | 2.254 | 2.038 | 2.740 | 2.704 | 2.686 |
| 2.865 | 2.086 | 2.679 | 2.777 | 2.391 | 3.339 |

|       |       |       |       |       |       |
|-------|-------|-------|-------|-------|-------|
| 3.233 | 1.605 | 1.554 | 2.801 | 4.028 | 4.661 |
| 1.760 | 1.779 | 2.617 | 1.967 | 1.339 | 2.592 |
| 1.954 | 1.991 | 1.571 | 1.652 | 1.525 | 1.486 |
| 3.848 | 3.639 | 4.081 | 4.253 | 4.086 | 5.100 |
| 2.184 | 3.009 | 2.771 | 3.455 | 3.028 | 4.984 |
| 3.214 | 2.522 | 2.779 | 3.601 | 3.725 | 5.978 |
| 1.891 | 2.237 | 1.683 | 1.986 | 1.966 | 2.794 |
| 3.580 | 3.604 | 4.615 | 3.819 | 3.679 | 3.608 |
| 2.094 | 2.533 | 2.530 | 3.545 | 3.083 | 3.192 |
| 6.933 | 7.471 | 6.023 | 7.514 | 7.130 | 7.715 |
| 7.428 | 7.388 | 6.700 | 7.725 | 7.470 | 8.286 |
| 2.583 | 2.545 | 2.575 | 2.645 | 2.817 | 2.951 |
| 3.800 | 3.052 | 3.888 | 3.005 | 3.810 | 2.841 |
| 3.243 | 3.031 | 2.397 | 2.973 | 2.893 | 2.407 |
| 3.780 | 2.154 | 2.960 | 2.694 | 2.124 | 2.338 |
| 2.102 | 3.210 | 3.865 | 3.569 | 3.328 | 3.391 |
| 2.978 | 3.235 | 3.623 | 3.825 | 3.193 | 1.722 |
| 3.030 | 1.872 | 2.868 | 2.857 | 2.998 | 1.479 |
| 2.591 | 3.570 | 3.119 | 2.807 | 3.158 | 3.158 |
| 3.312 | 3.608 | 2.677 | 3.619 | 4.115 | 5.010 |
| 3.338 | 4.146 | 3.629 | 4.414 | 4.348 | 5.979 |
| 2.570 | 2.380 | 1.724 | 1.843 | 2.561 | 2.791 |
| 2.190 | 2.792 | 1.912 | 2.025 | 2.202 | 2.709 |
| 3.177 | 3.167 | 2.362 | 3.492 | 3.016 | 1.983 |
| 3.718 | 3.332 | 4.000 | 3.540 | 2.485 | 1.736 |
| 3.695 | 2.096 | 3.695 | 4.024 | 3.758 | 1.383 |
| 4.502 | 4.475 | 4.460 | 4.968 | 4.615 | 2.830 |
| 1.850 | 2.139 | 2.123 | 2.244 | 2.717 | 3.192 |
| 4.150 | 2.994 | 3.153 | 4.232 | 4.660 | 2.066 |
| 4.231 | 3.710 | 3.254 | 4.321 | 4.055 | 4.515 |
| 3.171 | 2.828 | 3.154 | 2.943 | 3.794 | 3.646 |
| 2.586 | 2.847 | 2.339 | 2.564 | 2.345 | 2.454 |
| 2.148 | 2.445 | 1.987 | 1.783 | 2.850 | 2.343 |
| 5.102 | 4.496 | 5.192 | 5.102 | 4.807 | 5.991 |
| 5.091 | 4.403 | 4.137 | 4.434 | 4.199 | 4.708 |
| 6.062 | 5.254 | 6.444 | 5.213 | 3.076 | 4.450 |
| 2.305 | 3.556 | 3.155 | 1.879 | 2.859 | 4.798 |
| 1.501 | 1.397 | 2.039 | 3.086 | 2.121 | 2.615 |
| 2.155 | 3.209 | 3.076 | 2.783 | 3.361 | 3.143 |
| 3.361 | 3.222 | 3.151 | 4.143 | 3.569 | 3.948 |
| 6.888 | 5.606 | 6.420 | 7.902 | 6.239 | 7.767 |
| 2.745 | 3.210 | 3.061 | 2.889 | 3.240 | 4.729 |
| 1.980 | 2.430 | 2.920 | 4.054 | 3.958 | 4.741 |
| 4.344 | 3.829 | 3.974 | 4.457 | 3.521 | 4.705 |
| 3.888 | 3.116 | 3.281 | 3.479 | 1.935 | 4.002 |
| 8.464 | 8.788 | 8.723 | 8.548 | 8.680 | 8.171 |
| 4.647 | 5.224 | 5.588 | 4.648 | 5.667 | 5.799 |
| 3.882 | 4.047 | 4.300 | 4.373 | 3.929 | 4.806 |
| 2.282 | 2.646 | 2.211 | 2.060 | 2.191 | 2.495 |
| 4.109 | 3.557 | 3.345 | 3.797 | 3.776 | 4.703 |

|       |       |       |       |       |       |
|-------|-------|-------|-------|-------|-------|
| 3.533 | 3.206 | 3.354 | 3.642 | 3.797 | 4.566 |
| 2.557 | 1.588 | 1.553 | 2.580 | 2.010 | 2.326 |
| 4.818 | 5.053 | 4.369 | 4.211 | 4.203 | 4.700 |
| 2.896 | 3.008 | 2.969 | 3.457 | 3.008 | 1.257 |
| 5.414 | 4.576 | 5.546 | 5.457 | 5.222 | 4.100 |
| 3.373 | 2.870 | 2.952 | 3.690 | 2.590 | 1.922 |
| 2.731 | 2.161 | 3.116 | 2.521 | 3.123 | 1.646 |
| 3.088 | 3.441 | 2.161 | 3.492 | 3.740 | 2.568 |
| 3.491 | 3.534 | 2.812 | 3.110 | 2.582 | 3.685 |
| 2.156 | 1.867 | 2.352 | 2.330 | 2.139 | 2.578 |
| 5.037 | 5.561 | 4.900 | 4.653 | 4.606 | 3.688 |
| 2.573 | 1.285 | 2.072 | 2.999 | 1.504 | 2.221 |
| 3.620 | 2.768 | 3.616 | 3.743 | 3.496 | 3.220 |
| 3.832 | 4.784 | 6.577 | 6.016 | 6.633 | 5.070 |
| 4.777 | 3.614 | 3.333 | 5.296 | 3.674 | 2.659 |
| 3.151 | 2.273 | 2.464 | 2.751 | 2.508 | 3.252 |
| 2.545 | 2.431 | 2.655 | 2.707 | 2.342 | 3.130 |
| 2.328 | 2.690 | 2.530 | 3.316 | 2.810 | 3.029 |
| 3.514 | 3.404 | 3.582 | 3.417 | 3.803 | 5.070 |
| 3.031 | 4.150 | 4.195 | 3.383 | 3.724 | 2.119 |
| 2.125 | 1.926 | 2.105 | 1.449 | 1.918 | 1.586 |
| 2.427 | 1.761 | 2.097 | 1.846 | 1.769 | 2.814 |
| 2.241 | 2.928 | 2.910 | 2.361 | 3.780 | 3.272 |
| 2.626 | 2.476 | 3.384 | 2.377 | 2.718 | 1.631 |
| 5.636 | 6.716 | 5.953 | 5.638 | 5.872 | 4.363 |
| 2.722 | 1.762 | 2.465 | 2.606 | 3.436 | 2.885 |
| 3.320 | 1.849 | 2.882 | 3.204 | 3.722 | 2.268 |
| 2.462 | 3.343 | 2.349 | 2.305 | 1.770 | 1.420 |
| 3.639 | 3.290 | 2.872 | 3.031 | 2.659 | 2.366 |
| 4.701 | 3.876 | 4.602 | 4.685 | 4.190 | 3.657 |
| 1.542 | 1.868 | 1.724 | 2.015 | 2.017 | 3.090 |
| 4.941 | 3.575 | 3.909 | 4.288 | 3.850 | 3.827 |
| 3.044 | 2.334 | 2.968 | 2.972 | 2.754 | 2.076 |
| 4.761 | 3.856 | 4.471 | 4.578 | 4.428 | 2.843 |
| 2.552 | 2.584 | 3.285 | 3.475 | 2.791 | 2.709 |
| 3.909 | 4.032 | 4.425 | 4.253 | 4.495 | 4.519 |
| 1.985 | 1.197 | 2.597 | 2.330 | 2.299 | 3.179 |
| 2.204 | 2.003 | 2.284 | 1.887 | 1.825 | 2.839 |
| 2.953 | 2.731 | 2.491 | 3.597 | 2.816 | 2.738 |
| 1.714 | 1.861 | 2.540 | 1.976 | 1.606 | 2.282 |
| 4.535 | 4.203 | 4.957 | 4.593 | 4.250 | 4.995 |
| 2.589 | 3.115 | 2.066 | 3.129 | 2.979 | 2.562 |
| 2.616 | 3.105 | 2.930 | 3.819 | 2.558 | 4.547 |
| 3.071 | 3.121 | 2.967 | 3.910 | 3.711 | 4.414 |
| 2.416 | 2.799 | 2.289 | 2.584 | 2.308 | 2.458 |
| 6.486 | 5.897 | 6.107 | 5.141 | 5.108 | 1.671 |
| 2.259 | 2.663 | 2.573 | 2.253 | 2.264 | 4.681 |
| 5.439 | 5.179 | 5.195 | 5.914 | 5.252 | 6.313 |
| 3.782 | 4.433 | 4.469 | 4.517 | 4.541 | 4.754 |
| 2.926 | 4.252 | 3.383 | 2.459 | 2.374 | 2.748 |



|       |       |       |       |       |       |
|-------|-------|-------|-------|-------|-------|
| 2.264 | 2.066 | 1.942 | 2.888 | 2.380 | 3.478 |
| 4.592 | 4.271 | 4.493 | 4.840 | 4.183 | 5.042 |
| 2.092 | 3.218 | 2.638 | 2.648 | 2.140 | 2.812 |
| 2.042 | 2.179 | 1.181 | 2.263 | 2.029 | 2.296 |
| 6.018 | 4.884 | 6.068 | 5.335 | 5.406 | 6.054 |
| 4.605 | 4.597 | 4.469 | 4.690 | 4.133 | 3.952 |
| 3.121 | 2.329 | 2.451 | 3.623 | 3.388 | 3.791 |
| 5.818 | 5.388 | 5.582 | 5.961 | 5.725 | 5.538 |
| 3.696 | 2.680 | 3.072 | 3.661 | 3.061 | 3.386 |
| 5.365 | 5.063 | 5.304 | 5.236 | 4.574 | 5.517 |
| 2.872 | 4.529 | 3.791 | 3.901 | 4.239 | 3.499 |
| 2.188 | 2.475 | 1.822 | 1.865 | 2.480 | 3.648 |
| 3.506 | 3.810 | 4.399 | 3.678 | 4.018 | 3.029 |
| 2.585 | 3.886 | 2.027 | 2.414 | 3.536 | 2.329 |
| 8.154 | 7.824 | 7.975 | 7.912 | 7.828 | 7.211 |
| 4.052 | 3.814 | 4.131 | 3.350 | 3.718 | 3.838 |
| 3.272 | 3.268 | 3.888 | 3.449 | 3.310 | 2.917 |
| 3.980 | 4.220 | 4.224 | 4.266 | 4.451 | 4.631 |
| 5.205 | 5.161 | 5.114 | 5.433 | 5.288 | 4.036 |
| 2.620 | 2.203 | 2.467 | 2.450 | 2.750 | 2.965 |
| 2.265 | 2.281 | 2.014 | 2.799 | 2.039 | 3.676 |
| 2.731 | 2.925 | 2.432 | 2.426 | 2.460 | 1.554 |
| 4.225 | 4.305 | 4.443 | 3.770 | 4.337 | 3.483 |
| 2.994 | 2.843 | 3.226 | 2.777 | 3.066 | 2.416 |
| 4.037 | 3.889 | 3.252 | 3.974 | 4.005 | 4.624 |
| 4.792 | 4.851 | 5.427 | 4.776 | 4.784 | 3.464 |
| 1.875 | 1.575 | 1.429 | 1.997 | 1.651 | 1.982 |
| 2.298 | 2.618 | 2.602 | 2.846 | 3.208 | 3.407 |
| 3.556 | 2.571 | 3.282 | 3.773 | 2.558 | 1.720 |
| 4.100 | 3.368 | 4.004 | 3.660 | 4.074 | 2.735 |
| 5.654 | 5.543 | 5.591 | 5.870 | 5.470 | 2.539 |
| 1.929 | 2.108 | 2.210 | 1.684 | 1.964 | 2.154 |
| 4.410 | 4.561 | 4.424 | 4.398 | 4.431 | 3.770 |
| 4.131 | 3.980 | 4.764 | 4.638 | 4.336 | 4.774 |
| 2.990 | 3.419 | 3.431 | 2.594 | 2.327 | 3.747 |
| 3.847 | 3.282 | 2.430 | 1.966 | 2.985 | 1.892 |
| 4.928 | 4.566 | 4.325 | 4.808 | 4.155 | 4.491 |
| 3.203 | 3.854 | 3.341 | 2.799 | 3.801 | 2.748 |
| 3.071 | 2.965 | 2.484 | 2.647 | 2.102 | 3.325 |
| 3.679 | 2.976 | 4.004 | 4.283 | 3.732 | 3.468 |
| 4.386 | 5.075 | 3.728 | 3.551 | 3.809 | 5.946 |
| 2.564 | 1.781 | 2.695 | 4.013 | 2.565 | 4.342 |
| 2.312 | 1.851 | 2.986 | 2.704 | 3.056 | 3.127 |
| 1.567 | 2.826 | 1.669 | 1.267 | 1.571 | 2.089 |
| 2.472 | 2.610 | 4.206 | 4.032 | 3.189 | 4.308 |
| 2.251 | 3.262 | 2.988 | 2.931 | 2.725 | 4.516 |
| 3.023 | 2.760 | 2.781 | 3.167 | 2.670 | 2.727 |
| 1.767 | 2.073 | 2.192 | 2.032 | 1.945 | 4.807 |
| 2.973 | 3.711 | 3.043 | 2.995 | 2.137 | 2.168 |
| 1.819 | 2.678 | 2.028 | 2.034 | 2.505 | 2.146 |

|       |       |       |       |       |        |
|-------|-------|-------|-------|-------|--------|
| 2.251 | 2.278 | 2.608 | 2.598 | 2.906 | 2.038  |
| 5.614 | 5.233 | 5.035 | 5.089 | 4.841 | 2.633  |
| 1.917 | 1.905 | 1.800 | 1.455 | 1.920 | 3.115  |
| 5.425 | 5.101 | 4.749 | 5.231 | 5.488 | 5.837  |
| 2.345 | 2.109 | 2.432 | 2.918 | 2.707 | 4.251  |
| 3.480 | 4.038 | 3.917 | 3.685 | 3.996 | 4.641  |
| 5.318 | 4.922 | 4.657 | 4.803 | 4.683 | 5.303  |
| 2.681 | 2.164 | 2.019 | 1.746 | 3.030 | 2.185  |
| 2.409 | 2.258 | 2.150 | 2.676 | 1.831 | 2.714  |
| 2.258 | 2.641 | 2.770 | 2.923 | 3.233 | 2.981  |
| 2.383 | 3.268 | 2.664 | 2.789 | 2.333 | 2.190  |
| 5.144 | 4.193 | 4.170 | 3.505 | 3.753 | 0.930  |
| 2.658 | 3.612 | 3.704 | 3.688 | 3.849 | 5.028  |
| 2.929 | 2.155 | 2.518 | 2.829 | 3.174 | 1.792  |
| 3.106 | 1.994 | 3.324 | 3.399 | 2.723 | 2.877  |
| 6.107 | 6.025 | 5.832 | 6.306 | 6.060 | 7.239  |
| 5.759 | 5.569 | 5.340 | 5.892 | 5.500 | 6.483  |
| 2.808 | 3.537 | 2.544 | 3.919 | 2.716 | 3.438  |
| 4.887 | 3.906 | 3.718 | 3.652 | 4.010 | 3.718  |
| 7.258 | 6.905 | 7.024 | 6.882 | 6.992 | 8.488  |
| 9.288 | 8.979 | 8.740 | 9.641 | 9.370 | 10.231 |
| 2.712 | 2.111 | 2.630 | 2.772 | 1.843 | 2.926  |
| 3.028 | 3.862 | 2.794 | 3.386 | 4.206 | 3.295  |
| 4.474 | 3.210 | 3.631 | 4.534 | 3.762 | 3.909  |
| 2.227 | 2.420 | 2.189 | 1.878 | 2.666 | 1.803  |
| 4.483 | 4.234 | 5.158 | 4.942 | 4.731 | 4.463  |
| 1.905 | 2.401 | 2.104 | 1.992 | 1.972 | 1.075  |
| 3.034 | 2.658 | 3.320 | 2.914 | 2.164 | 1.607  |
| 5.353 | 5.498 | 5.138 | 5.440 | 3.974 | 5.768  |
| 4.519 | 3.621 | 3.896 | 6.019 | 3.920 | 6.891  |
| 2.500 | 1.879 | 3.026 | 3.021 | 2.660 | 1.864  |
| 3.687 | 3.029 | 3.265 | 4.015 | 3.593 | 4.949  |
| 4.188 | 4.334 | 4.420 | 4.861 | 4.645 | 5.573  |
| 5.732 | 5.768 | 4.993 | 5.562 | 5.087 | 5.514  |
| 6.362 | 5.547 | 5.686 | 6.249 | 5.771 | 6.312  |
| 2.129 | 3.280 | 1.960 | 1.373 | 2.658 | 1.311  |
| 3.030 | 1.744 | 2.207 | 3.241 | 2.342 | 2.531  |
| 2.662 | 2.164 | 2.722 | 2.722 | 2.218 | 1.537  |
| 5.741 | 5.456 | 6.006 | 6.036 | 5.324 | 4.915  |
| 3.302 | 3.679 | 4.060 | 3.249 | 3.483 | 1.982  |
| 4.703 | 4.518 | 4.499 | 3.709 | 4.200 | 3.520  |
| 2.850 | 4.058 | 2.838 | 2.372 | 3.498 | 3.569  |
| 2.947 | 1.642 | 2.179 | 3.155 | 2.509 | 4.912  |
| 2.577 | 2.699 | 2.349 | 1.970 | 2.109 | 2.129  |
| 5.033 | 4.971 | 5.588 | 5.471 | 5.687 | 4.840  |
| 5.192 | 6.842 | 5.873 | 5.184 | 6.327 | 6.833  |
| 6.206 | 5.342 | 6.274 | 6.246 | 5.836 | 5.806  |
| 8.938 | 8.405 | 9.075 | 8.684 | 8.428 | 8.638  |
| 2.733 | 3.574 | 4.131 | 2.781 | 3.730 | 1.154  |
| 9.808 | 9.672 | 9.624 | 9.477 | 9.522 | 9.978  |

|       |       |       |       |       |       |
|-------|-------|-------|-------|-------|-------|
| 3.465 | 4.084 | 3.991 | 3.910 | 3.713 | 3.182 |
| 6.416 | 5.638 | 6.154 | 6.683 | 6.270 | 5.905 |
| 4.038 | 4.226 | 5.066 | 4.361 | 3.779 | 4.228 |
| 3.655 | 3.636 | 3.297 | 3.823 | 3.742 | 3.045 |
| 2.959 | 2.605 | 2.927 | 2.272 | 2.696 | 2.272 |
| 3.480 | 4.103 | 3.886 | 3.563 | 4.497 | 3.415 |
| 1.951 | 2.237 | 2.762 | 2.652 | 3.240 | 1.762 |
| 2.283 | 2.600 | 2.704 | 2.869 | 2.908 | 4.724 |
| 5.445 | 5.484 | 4.563 | 5.636 | 5.154 | 5.729 |
| 2.493 | 2.258 | 2.244 | 2.567 | 2.806 | 2.595 |
| 2.349 | 2.535 | 3.723 | 2.737 | 3.354 | 1.853 |
| 1.867 | 3.022 | 2.363 | 2.885 | 2.656 | 2.168 |
| 4.326 | 3.167 | 4.139 | 4.792 | 4.147 | 2.597 |
| 3.960 | 4.739 | 4.297 | 3.892 | 3.721 | 3.642 |
| 3.132 | 3.470 | 3.390 | 3.194 | 3.739 | 3.154 |
| 2.602 | 2.546 | 3.217 | 3.199 | 2.952 | 3.266 |
| 3.161 | 3.400 | 3.394 | 3.579 | 3.727 | 2.648 |
| 4.986 | 5.205 | 4.595 | 4.756 | 4.590 | 4.887 |
| 3.458 | 2.365 | 3.586 | 2.530 | 2.433 | 3.281 |
| 2.043 | 2.029 | 1.550 | 2.043 | 2.043 | 2.279 |
| 2.470 | 2.524 | 2.656 | 2.817 | 2.401 | 1.445 |
| 4.109 | 4.568 | 5.006 | 4.403 | 4.677 | 3.692 |
| 5.812 | 6.013 | 5.870 | 5.718 | 5.767 | 4.912 |
| 9.077 | 9.010 | 8.891 | 8.950 | 8.871 | 7.726 |
| 2.901 | 2.300 | 2.589 | 2.518 | 2.186 | 1.880 |
| 2.841 | 2.222 | 2.567 | 2.780 | 2.812 | 3.162 |
| 3.715 | 3.369 | 3.558 | 3.095 | 3.970 | 3.643 |
| 3.237 | 3.760 | 2.690 | 3.699 | 2.727 | 4.084 |
| 6.848 | 6.615 | 6.970 | 7.404 | 7.803 | 9.119 |
| 3.807 | 2.742 | 3.891 | 2.895 | 3.439 | 1.709 |
| 3.833 | 2.665 | 3.794 | 3.413 | 3.533 | 4.393 |
| 2.422 | 3.267 | 3.729 | 2.404 | 2.378 | 4.286 |
| 2.010 | 2.084 | 2.693 | 1.724 | 2.081 | 3.161 |
| 5.417 | 6.353 | 6.379 | 5.690 | 5.658 | 7.032 |
| 5.241 | 5.387 | 5.535 | 5.245 | 5.051 | 6.048 |
| 7.176 | 6.842 | 6.908 | 6.980 | 7.058 | 5.763 |
| 2.944 | 3.104 | 3.228 | 3.129 | 2.988 | 2.671 |
| 7.027 | 7.377 | 7.278 | 7.421 | 7.380 | 7.285 |
| 7.973 | 7.959 | 8.065 | 7.918 | 7.974 | 6.900 |
| 7.119 | 7.020 | 7.147 | 6.936 | 7.049 | 3.985 |
| 7.715 | 7.588 | 7.662 | 7.878 | 7.593 | 7.015 |
| 3.042 | 3.553 | 3.635 | 3.783 | 3.197 | 2.608 |
| 3.510 | 3.328 | 2.913 | 3.129 | 3.183 | 3.527 |
| 4.256 | 3.169 | 4.025 | 3.765 | 3.970 | 4.935 |
| 4.152 | 4.807 | 4.612 | 5.135 | 4.965 | 6.183 |
| 5.673 | 5.722 | 5.992 | 5.647 | 5.700 | 3.014 |
| 8.176 | 8.118 | 8.031 | 7.719 | 7.811 | 4.955 |
| 5.515 | 5.882 | 6.091 | 5.697 | 6.080 | 2.451 |
| 4.928 | 5.119 | 5.067 | 5.282 | 5.156 | 5.219 |
| 1.222 | 1.751 | 1.104 | 1.966 | 1.552 | 3.184 |

|       |       |       |       |       |       |
|-------|-------|-------|-------|-------|-------|
| 2.968 | 2.529 | 3.370 | 2.379 | 2.403 | 4.115 |
| 4.128 | 4.387 | 4.537 | 3.854 | 4.849 | 2.859 |
| 5.449 | 4.771 | 4.789 | 4.820 | 4.960 | 2.877 |
| 7.570 | 7.692 | 7.354 | 7.309 | 6.993 | 4.929 |
| 3.485 | 3.593 | 3.479 | 2.861 | 3.484 | 2.589 |
| 3.522 | 2.903 | 3.377 | 3.575 | 3.390 | 4.349 |
| 4.439 | 4.236 | 4.161 | 3.805 | 4.114 | 4.811 |
| 4.991 | 5.196 | 5.115 | 5.093 | 5.562 | 4.821 |
| 6.034 | 6.384 | 6.326 | 6.592 | 6.468 | 5.258 |
| 7.400 | 7.449 | 7.587 | 7.613 | 7.698 | 7.416 |
| 4.678 | 4.613 | 4.917 | 5.571 | 5.412 | 8.167 |
| 4.162 | 4.753 | 5.218 | 5.182 | 4.467 | 5.610 |
| 5.208 | 5.582 | 5.614 | 5.101 | 5.344 | 4.326 |
| 4.085 | 3.862 | 4.054 | 3.878 | 3.861 | 4.626 |
| 5.451 | 5.731 | 5.652 | 5.561 | 5.903 | 5.202 |
| 4.786 | 4.606 | 4.434 | 5.106 | 5.154 | 6.249 |
| 4.522 | 3.261 | 4.153 | 3.242 | 2.938 | 3.072 |
| 7.225 | 6.778 | 7.073 | 7.151 | 7.191 | 6.559 |
| 4.607 | 4.943 | 5.412 | 4.816 | 4.497 | 2.315 |
| 3.277 | 3.426 | 3.378 | 3.299 | 3.289 | 2.922 |
| 2.240 | 2.389 | 2.135 | 1.469 | 2.012 | 1.999 |
| 5.073 | 4.389 | 4.314 | 4.389 | 4.331 | 4.342 |
| 6.310 | 6.105 | 5.951 | 5.977 | 5.671 | 6.826 |
| 5.240 | 4.579 | 4.942 | 5.616 | 4.499 | 3.622 |
| 3.615 | 4.167 | 3.009 | 3.013 | 3.450 | 3.942 |
| 4.818 | 4.818 | 4.987 | 4.969 | 5.174 | 4.767 |
| 2.638 | 3.043 | 2.841 | 2.775 | 2.682 | 2.043 |
| 4.089 | 5.054 | 4.767 | 5.091 | 5.176 | 4.504 |
| 3.917 | 4.404 | 4.754 | 3.890 | 3.847 | 3.942 |
| 5.423 | 5.859 | 5.525 | 5.240 | 5.422 | 3.735 |
| 5.586 | 6.326 | 6.118 | 6.038 | 6.087 | 5.253 |
| 1.436 | 1.704 | 1.828 | 2.117 | 1.323 | 1.585 |
| 2.956 | 2.590 | 2.554 | 2.739 | 3.049 | 3.176 |
| 4.343 | 4.818 | 4.789 | 4.965 | 4.784 | 4.000 |
| 7.352 | 7.180 | 7.179 | 6.939 | 7.298 | 6.606 |
| 3.211 | 1.897 | 4.170 | 1.931 | 2.798 | 1.498 |
| 3.735 | 4.897 | 5.293 | 4.366 | 4.537 | 3.958 |
| 5.886 | 6.061 | 6.044 | 5.815 | 5.488 | 5.111 |
| 5.536 | 5.210 | 5.505 | 5.697 | 5.620 | 4.234 |
| 2.748 | 3.088 | 2.822 | 3.115 | 4.025 | 5.312 |
| 2.796 | 2.009 | 1.741 | 3.503 | 3.612 | 1.424 |
| 8.017 | 7.619 | 7.845 | 7.953 | 7.643 | 5.553 |
| 2.029 | 2.454 | 2.196 | 1.826 | 2.212 | 1.978 |
| 4.920 | 4.362 | 5.063 | 4.575 | 4.521 | 2.160 |
| 7.210 | 7.386 | 7.488 | 6.940 | 7.313 | 6.216 |
| 1.587 | 1.847 | 1.789 | 2.954 | 1.808 | 1.596 |
| 3.915 | 4.143 | 4.415 | 4.270 | 4.806 | 5.491 |
| 6.141 | 5.707 | 5.522 | 6.091 | 5.848 | 4.973 |
| 4.748 | 4.994 | 4.993 | 4.913 | 5.019 | 3.942 |
| 6.302 | 6.168 | 6.145 | 6.207 | 6.143 | 5.318 |

|       |       |       |       |       |       |
|-------|-------|-------|-------|-------|-------|
| 5.534 | 5.151 | 5.120 | 5.426 | 5.219 | 5.147 |
| 5.022 | 4.468 | 4.843 | 4.774 | 4.763 | 4.917 |
| 5.591 | 5.891 | 6.008 | 6.041 | 6.035 | 4.178 |
| 6.150 | 6.349 | 6.226 | 5.942 | 6.211 | 4.003 |
| 8.464 | 8.893 | 8.866 | 8.504 | 8.744 | 6.937 |
| 7.875 | 7.539 | 7.958 | 7.873 | 7.710 | 5.921 |
| 7.543 | 7.035 | 7.390 | 7.185 | 7.018 | 5.087 |
| 4.540 | 4.440 | 4.575 | 4.048 | 4.149 | 2.952 |
| 5.106 | 5.667 | 5.237 | 4.840 | 5.081 | 3.214 |
| 3.937 | 4.170 | 3.981 | 3.699 | 4.101 | 3.676 |
| 2.933 | 2.286 | 2.811 | 2.940 | 2.731 | 3.215 |
| 2.509 | 2.911 | 2.802 | 2.945 | 2.239 | 2.602 |
| 3.653 | 3.969 | 3.871 | 3.915 | 3.712 | 4.426 |
| 5.802 | 5.862 | 5.906 | 6.136 | 6.032 | 7.630 |
| 2.947 | 3.137 | 3.585 | 3.312 | 2.903 | 4.260 |
| 3.008 | 2.636 | 3.310 | 3.109 | 2.826 | 3.765 |
| 3.010 | 2.626 | 3.307 | 3.254 | 2.816 | 3.774 |
| 2.978 | 2.720 | 3.349 | 3.013 | 2.462 | 3.679 |
| 2.786 | 2.692 | 3.306 | 2.994 | 2.625 | 3.594 |
| 2.702 | 2.658 | 3.219 | 3.115 | 2.815 | 3.512 |
| 1.619 | 2.279 | 1.821 | 2.379 | 3.090 | 3.194 |
| 5.616 | 4.937 | 5.429 | 5.146 | 5.197 | 5.693 |
| 4.129 | 3.468 | 3.447 | 2.911 | 3.426 | 3.652 |
| 5.440 | 5.404 | 5.045 | 5.046 | 5.163 | 6.182 |
| 4.870 | 4.433 | 4.323 | 4.659 | 4.924 | 5.091 |
| 5.402 | 5.490 | 5.690 | 5.187 | 5.075 | 5.980 |
| 2.448 | 3.007 | 3.502 | 2.322 | 2.876 | 1.901 |
| 6.117 | 6.751 | 6.391 | 6.436 | 6.334 | 6.438 |
| 2.018 | 1.708 | 1.944 | 1.936 | 1.930 | 2.698 |
| 3.281 | 3.116 | 3.512 | 3.059 | 3.253 | 2.406 |
| 5.213 | 5.689 | 5.338 | 5.353 | 5.881 | 5.432 |
| 6.667 | 6.450 | 6.520 | 6.709 | 6.506 | 4.993 |
| 6.056 | 6.266 | 6.433 | 6.096 | 6.444 | 7.977 |
| 3.888 | 3.596 | 4.314 | 4.180 | 4.310 | 3.163 |
| 4.331 | 4.394 | 4.622 | 4.247 | 3.975 | 2.420 |
| 4.483 | 4.574 | 4.272 | 4.145 | 4.126 | 4.707 |
| 6.017 | 6.029 | 6.708 | 4.952 | 5.456 | 7.162 |
| 3.900 | 3.915 | 4.338 | 3.520 | 3.937 | 1.277 |
| 2.588 | 3.027 | 2.957 | 2.736 | 2.997 | 3.136 |
| 3.136 | 3.741 | 3.545 | 2.835 | 3.136 | 3.624 |
| 5.342 | 5.830 | 5.594 | 4.552 | 5.238 | 5.163 |
| 4.635 | 4.212 | 4.881 | 4.360 | 4.660 | 3.889 |
| 4.065 | 3.583 | 3.922 | 3.469 | 3.842 | 5.259 |
| 6.225 | 6.190 | 6.512 | 6.012 | 6.058 | 5.512 |
| 3.820 | 2.031 | 3.005 | 3.245 | 3.411 | 0.884 |
| 5.228 | 5.020 | 5.158 | 5.003 | 4.692 | 4.573 |
| 4.904 | 4.941 | 5.191 | 4.995 | 4.960 | 3.895 |
| 4.313 | 4.095 | 4.121 | 3.749 | 4.154 | 3.819 |
| 2.649 | 2.714 | 2.652 | 3.788 | 3.715 | 3.592 |
| 8.041 | 6.607 | 7.800 | 6.182 | 6.196 | 4.716 |

|       |       |       |       |       |        |
|-------|-------|-------|-------|-------|--------|
| 4.598 | 3.412 | 4.242 | 3.484 | 3.505 | 3.806  |
| 4.234 | 3.924 | 4.369 | 4.504 | 4.094 | 3.388  |
| 5.932 | 5.305 | 5.508 | 5.254 | 5.669 | 3.408  |
| 3.938 | 3.901 | 3.695 | 3.954 | 3.800 | 4.600  |
| 5.816 | 5.750 | 5.902 | 5.801 | 6.008 | 3.859  |
| 3.855 | 4.059 | 4.013 | 4.471 | 3.976 | 4.501  |
| 2.505 | 2.043 | 1.739 | 1.695 | 2.269 | 1.956  |
| 1.815 | 1.786 | 2.120 | 1.534 | 2.492 | 4.677  |
| 3.756 | 3.748 | 3.547 | 3.648 | 3.458 | 3.444  |
| 2.714 | 3.827 | 3.241 | 3.053 | 3.554 | 3.178  |
| 1.566 | 2.260 | 2.439 | 3.210 | 1.891 | 2.260  |
| 7.331 | 7.288 | 7.237 | 7.186 | 7.079 | 6.176  |
| 3.379 | 3.405 | 2.828 | 2.412 | 3.238 | 2.303  |
| 4.278 | 4.549 | 4.649 | 4.306 | 4.354 | 3.402  |
| 3.951 | 3.184 | 3.459 | 3.542 | 3.399 | 2.751  |
| 2.124 | 2.494 | 3.090 | 2.340 | 2.781 | 2.237  |
| 4.390 | 3.036 | 3.835 | 4.757 | 3.556 | 4.628  |
| 5.609 | 6.533 | 6.449 | 6.904 | 7.543 | 9.206  |
| 7.820 | 7.511 | 7.411 | 7.378 | 7.562 | 7.276  |
| 5.778 | 6.064 | 5.970 | 6.116 | 6.112 | 5.098  |
| 4.901 | 4.309 | 5.394 | 4.817 | 3.503 | 2.642  |
| 6.825 | 6.909 | 6.936 | 6.764 | 6.559 | 6.159  |
| 2.838 | 2.819 | 2.857 | 2.887 | 3.155 | 3.143  |
| 4.505 | 4.370 | 4.311 | 4.456 | 4.621 | 3.955  |
| 6.148 | 5.484 | 5.668 | 5.868 | 5.524 | 6.818  |
| 3.301 | 1.993 | 2.231 | 3.394 | 3.402 | 4.906  |
| 7.017 | 6.980 | 6.960 | 7.075 | 7.308 | 6.178  |
| 2.976 | 2.283 | 3.116 | 3.039 | 3.010 | 2.817  |
| 5.314 | 5.517 | 5.484 | 5.332 | 5.352 | 6.429  |
| 1.761 | 2.237 | 1.454 | 1.732 | 1.920 | 1.572  |
| 6.744 | 7.356 | 7.063 | 7.640 | 7.819 | 9.338  |
| 6.378 | 6.687 | 6.822 | 5.897 | 6.334 | 2.783  |
| 9.899 | 9.241 | 8.943 | 9.179 | 9.012 | 10.243 |
| 4.277 | 4.007 | 3.162 | 2.774 | 2.849 | 3.524  |
| 4.900 | 4.202 | 4.569 | 4.561 | 4.166 | 2.484  |
| 2.476 | 1.734 | 1.887 | 2.156 | 2.226 | 2.824  |
| 2.958 | 2.566 | 2.385 | 2.467 | 2.252 | 2.620  |
| 5.523 | 4.748 | 4.725 | 5.010 | 5.059 | 5.917  |
| 6.751 | 6.137 | 6.628 | 5.868 | 5.758 | 4.914  |
| 8.640 | 8.734 | 8.718 | 8.654 | 8.453 | 7.618  |
| 2.577 | 2.856 | 3.478 | 2.841 | 3.344 | 3.547  |
| 6.010 | 5.900 | 5.830 | 5.623 | 5.685 | 5.782  |
| 5.938 | 6.108 | 5.980 | 6.458 | 6.404 | 7.836  |
| 3.577 | 4.468 | 4.056 | 4.267 | 4.030 | 4.992  |
| 4.508 | 4.685 | 4.708 | 4.535 | 4.356 | 4.212  |
| 4.727 | 4.114 | 4.691 | 3.931 | 3.731 | 4.385  |
| 5.952 | 6.352 | 5.875 | 6.033 | 6.017 | 4.933  |
| 6.595 | 7.060 | 7.021 | 6.732 | 6.510 | 7.531  |
| 9.226 | 9.066 | 9.183 | 9.175 | 9.248 | 8.447  |
| 3.712 | 4.801 | 3.041 | 2.122 | 2.718 | 4.567  |

|       |       |       |       |       |       |
|-------|-------|-------|-------|-------|-------|
| 9.613 | 9.288 | 9.489 | 9.649 | 9.387 | 8.033 |
| 8.552 | 8.773 | 8.741 | 8.689 | 8.717 | 6.835 |
| 5.292 | 5.571 | 5.504 | 5.222 | 5.433 | 3.772 |
| 5.949 | 5.922 | 6.135 | 5.821 | 5.684 | 6.072 |
| 6.335 | 6.425 | 6.510 | 6.526 | 6.331 | 4.926 |
| 3.365 | 2.741 | 3.730 | 3.709 | 3.738 | 4.367 |
| 3.791 | 3.297 | 3.962 | 3.245 | 3.627 | 3.661 |
| 4.602 | 4.804 | 4.354 | 3.959 | 4.248 | 4.211 |
| 4.499 | 4.361 | 2.974 | 4.006 | 2.599 | 4.792 |
| 4.772 | 4.454 | 4.133 | 4.713 | 4.038 | 4.093 |
| 5.735 | 5.996 | 5.813 | 5.905 | 5.950 | 4.017 |
| 6.784 | 6.678 | 6.744 | 7.023 | 6.947 | 7.606 |
| 1.869 | 2.291 | 2.015 | 1.968 | 1.690 | 2.562 |
| 5.557 | 5.235 | 5.184 | 5.690 | 5.494 | 4.450 |
| 7.716 | 7.576 | 7.753 | 7.863 | 7.884 | 9.193 |
| 7.142 | 6.897 | 7.150 | 7.510 | 7.205 | 8.240 |
| 6.882 | 7.126 | 7.040 | 7.122 | 7.053 | 6.240 |
| 4.622 | 4.883 | 4.954 | 5.154 | 5.597 | 6.189 |
| 7.542 | 7.279 | 7.142 | 7.719 | 7.600 | 8.913 |
| 7.870 | 8.090 | 8.019 | 8.027 | 7.733 | 6.847 |
| 4.542 | 4.046 | 4.418 | 4.178 | 4.716 | 4.658 |
| 6.366 | 6.443 | 6.469 | 6.606 | 6.572 | 5.506 |
| 2.758 | 2.159 | 2.397 | 2.597 | 2.929 | 1.923 |
| 4.938 | 4.399 | 5.038 | 4.963 | 5.109 | 3.011 |
| 5.263 | 5.543 | 5.285 | 4.956 | 5.266 | 4.513 |
| 2.549 | 2.332 | 2.497 | 2.252 | 2.409 | 2.903 |
| 4.330 | 4.533 | 4.033 | 4.569 | 4.447 | 4.052 |
| 3.682 | 4.325 | 4.281 | 4.419 | 4.030 | 4.579 |
| 6.816 | 6.838 | 6.907 | 6.758 | 6.969 | 5.407 |
| 6.743 | 6.935 | 6.849 | 6.868 | 6.682 | 5.719 |
| 5.711 | 5.748 | 5.695 | 5.572 | 5.468 | 6.669 |
| 4.540 | 4.642 | 4.404 | 4.289 | 4.683 | 5.197 |
| 5.461 | 5.562 | 5.625 | 5.688 | 5.582 | 4.740 |
| 3.346 | 3.371 | 3.292 | 3.831 | 3.798 | 3.812 |
| 6.274 | 6.238 | 6.183 | 6.683 | 6.425 | 5.439 |
| 2.288 | 2.310 | 2.546 | 2.402 | 2.382 | 2.048 |
| 3.760 | 4.334 | 4.501 | 3.398 | 3.700 | 2.972 |
| 4.086 | 4.113 | 4.318 | 3.913 | 4.462 | 6.655 |
| 4.537 | 5.164 | 5.086 | 5.157 | 4.731 | 3.418 |
| 7.414 | 7.222 | 7.262 | 7.519 | 7.227 | 8.309 |
| 6.089 | 6.708 | 6.063 | 6.185 | 6.569 | 6.986 |
| 2.620 | 2.007 | 2.251 | 2.309 | 2.055 | 1.769 |
| 6.486 | 6.681 | 6.592 | 6.696 | 6.890 | 5.747 |
| 6.053 | 6.540 | 6.118 | 6.237 | 6.226 | 5.205 |
| 5.399 | 5.333 | 5.242 | 5.040 | 5.520 | 1.421 |
| 4.055 | 3.896 | 3.918 | 3.477 | 4.567 | 6.084 |
| 6.385 | 6.751 | 6.436 | 6.637 | 6.550 | 5.177 |
| 8.972 | 8.384 | 8.658 | 8.606 | 8.578 | 6.865 |
| 5.709 | 5.535 | 5.343 | 5.431 | 5.435 | 3.977 |
| 4.070 | 5.045 | 4.550 | 4.501 | 4.380 | 3.319 |

|       |       |       |       |       |       |
|-------|-------|-------|-------|-------|-------|
| 7.495 | 6.790 | 6.965 | 7.672 | 7.371 | 8.093 |
| 4.706 | 5.058 | 4.955 | 5.063 | 5.214 | 3.498 |
| 2.315 | 2.565 | 2.616 | 2.488 | 2.385 | 3.221 |
| 2.669 | 3.051 | 2.938 | 2.574 | 3.087 | 3.470 |
| 3.327 | 3.658 | 3.547 | 3.149 | 2.839 | 3.296 |
| 5.210 | 5.430 | 5.673 | 5.459 | 5.266 | 6.354 |
| 1.866 | 2.292 | 2.104 | 2.295 | 1.540 | 2.292 |
| 5.738 | 5.536 | 5.965 | 5.390 | 5.414 | 4.471 |
| 2.775 | 3.164 | 3.573 | 3.095 | 3.575 | 3.707 |
| 4.014 | 4.994 | 4.805 | 4.834 | 4.520 | 3.717 |
| 5.264 | 5.552 | 5.545 | 5.592 | 5.761 | 4.997 |
| 3.034 | 2.838 | 3.314 | 3.437 | 2.442 | 3.793 |
| 3.714 | 2.900 | 2.799 | 2.593 | 3.514 | 6.476 |
| 5.789 | 5.489 | 5.926 | 5.598 | 5.486 | 4.870 |
| 6.122 | 6.234 | 6.245 | 6.562 | 6.522 | 6.986 |
| 6.601 | 6.017 | 6.214 | 6.426 | 6.391 | 5.974 |
| 6.931 | 7.836 | 7.250 | 7.200 | 7.664 | 7.022 |
| 3.834 | 4.711 | 4.550 | 3.191 | 4.221 | 1.629 |
| 3.593 | 3.856 | 2.682 | 3.842 | 3.856 | 4.159 |
| 4.827 | 5.364 | 5.213 | 5.514 | 5.548 | 4.871 |
| 4.968 | 5.103 | 5.110 | 5.395 | 5.243 | 6.230 |
| 3.091 | 2.184 | 1.650 | 2.774 | 1.830 | 1.719 |
| 5.014 | 5.592 | 5.537 | 5.430 | 5.648 | 4.848 |
| 7.468 | 7.419 | 7.092 | 7.667 | 6.941 | 5.996 |
| 2.963 | 3.089 | 3.703 | 3.600 | 3.214 | 2.474 |
| 4.655 | 4.874 | 4.813 | 4.590 | 5.001 | 3.157 |
| 5.593 | 6.021 | 6.160 | 5.789 | 5.641 | 0.855 |
| 7.173 | 6.616 | 6.649 | 6.671 | 7.081 | 7.196 |
| 5.916 | 6.108 | 5.979 | 6.016 | 6.216 | 5.514 |
| 3.608 | 3.872 | 3.815 | 3.637 | 4.000 | 4.982 |
| 4.859 | 5.841 | 5.381 | 5.265 | 5.603 | 4.594 |
| 3.135 | 3.968 | 4.061 | 3.916 | 4.065 | 5.004 |
| 4.144 | 4.781 | 4.483 | 4.419 | 4.700 | 4.384 |
| 6.678 | 6.670 | 6.607 | 6.945 | 6.413 | 3.966 |
| 3.347 | 2.967 | 3.518 | 3.504 | 3.491 | 2.804 |
| 5.445 | 5.857 | 5.794 | 5.207 | 5.224 | 4.654 |
| 2.068 | 2.122 | 1.920 | 2.543 | 2.484 | 3.581 |
| 5.620 | 5.487 | 5.592 | 5.547 | 5.679 | 5.040 |
| 8.014 | 8.171 | 7.946 | 8.020 | 7.943 | 6.886 |
| 2.715 | 3.466 | 3.703 | 3.237 | 3.432 | 3.440 |
| 4.147 | 3.913 | 4.147 | 3.837 | 4.265 | 5.264 |
| 3.518 | 4.097 | 3.893 | 4.152 | 4.082 | 5.042 |
| 5.832 | 5.787 | 5.669 | 6.009 | 5.923 | 6.871 |
| 6.206 | 5.685 | 6.006 | 5.961 | 5.844 | 5.591 |
| 6.925 | 7.115 | 6.984 | 6.938 | 7.124 | 6.633 |
| 6.926 | 6.968 | 6.884 | 6.947 | 6.820 | 5.395 |
| 3.424 | 2.209 | 2.068 | 3.024 | 2.478 | 2.332 |
| 6.214 | 6.347 | 6.245 | 6.028 | 6.102 | 5.796 |
| 3.832 | 2.348 | 2.705 | 2.757 | 2.781 | 2.237 |
| 6.306 | 6.338 | 6.034 | 6.109 | 6.120 | 4.082 |



|       |       |       |       |       |       |
|-------|-------|-------|-------|-------|-------|
| 7.523 | 7.224 | 7.380 | 7.213 | 7.363 | 6.172 |
| 9.008 | 7.320 | 7.954 | 8.390 | 7.348 | 5.196 |
| 6.520 | 5.646 | 5.504 | 6.172 | 5.917 | 4.948 |
| 5.363 | 4.683 | 4.758 | 5.210 | 4.723 | 4.454 |
| 7.109 | 6.367 | 6.294 | 7.299 | 7.194 | 8.372 |
| 2.915 | 3.002 | 2.880 | 3.748 | 3.143 | 5.013 |
| 3.418 | 4.805 | 4.930 | 4.652 | 5.085 | 4.192 |
| 2.820 | 2.547 | 2.556 | 2.538 | 2.633 | 3.813 |
| 4.299 | 4.033 | 4.650 | 3.918 | 3.927 | 0.596 |
| 2.944 | 2.871 | 3.350 | 3.435 | 2.363 | 2.614 |
| 5.639 | 4.875 | 5.386 | 5.064 | 5.091 | 3.491 |
| 4.998 | 4.347 | 4.922 | 6.168 | 4.697 | 4.348 |
| 4.939 | 5.749 | 5.508 | 5.552 | 5.690 | 4.807 |
| 5.678 | 5.738 | 5.973 | 5.572 | 5.843 | 7.129 |
| 4.628 | 3.987 | 3.249 | 3.847 | 4.239 | 3.080 |
| 2.887 | 2.972 | 3.235 | 2.571 | 2.819 | 3.079 |
| 5.537 | 5.796 | 5.680 | 5.431 | 5.532 | 5.640 |
| 4.091 | 4.264 | 4.071 | 4.558 | 4.122 | 4.028 |
| 3.072 | 2.822 | 2.976 | 3.097 | 3.052 | 3.479 |
| 3.778 | 4.826 | 4.381 | 4.484 | 4.953 | 4.675 |
| 3.497 | 3.262 | 3.698 | 3.743 | 3.705 | 3.645 |
| 5.736 | 6.104 | 6.238 | 6.684 | 6.431 | 5.729 |
| 8.141 | 7.443 | 7.632 | 8.282 | 7.868 | 8.888 |
| 4.791 | 4.234 | 4.316 | 4.344 | 4.200 | 3.185 |
| 2.395 | 2.998 | 2.407 | 2.391 | 2.719 | 1.818 |
| 5.621 | 5.897 | 5.879 | 5.626 | 5.542 | 5.016 |
| 2.570 | 3.108 | 2.952 | 2.529 | 3.498 | 4.016 |
| 4.969 | 4.845 | 5.564 | 5.188 | 5.611 | 4.144 |
| 5.072 | 3.931 | 3.699 | 4.009 | 4.817 | 3.960 |
| 2.207 | 1.546 | 2.729 | 2.108 | 1.774 | 2.584 |
| 2.499 | 3.492 | 3.440 | 3.056 | 2.723 | 2.975 |
| 3.465 | 3.498 | 3.663 | 3.868 | 3.506 | 4.045 |
| 4.429 | 3.859 | 4.466 | 3.943 | 4.128 | 3.419 |
| 7.998 | 7.813 | 7.959 | 7.460 | 7.825 | 5.696 |
| 3.560 | 3.248 | 3.418 | 3.473 | 3.427 | 3.606 |
| 3.776 | 3.864 | 4.002 | 3.223 | 4.408 | 3.399 |
| 4.220 | 4.047 | 4.441 | 4.391 | 4.172 | 4.448 |
| 6.480 | 6.819 | 6.831 | 6.508 | 6.786 | 5.895 |
| 5.289 | 4.770 | 4.889 | 5.149 | 5.190 | 5.243 |
| 6.678 | 6.347 | 6.671 | 6.363 | 6.169 | 4.034 |
| 2.495 | 2.496 | 2.105 | 2.410 | 2.214 | 2.742 |
| 2.957 | 2.788 | 2.833 | 2.252 | 2.325 | 3.870 |
| 2.416 | 2.647 | 3.179 | 3.459 | 2.680 | 2.495 |
| 3.521 | 4.072 | 4.335 | 3.860 | 4.663 | 5.829 |
| 0.966 | 1.778 | 1.627 | 0.880 | 1.198 | 2.144 |
| 4.901 | 3.878 | 4.462 | 4.981 | 4.733 | 5.346 |
| 3.975 | 2.250 | 3.274 | 3.701 | 2.760 | 2.568 |
| 5.955 | 5.495 | 5.701 | 5.741 | 5.651 | 4.919 |
| 2.590 | 3.249 | 3.695 | 4.488 | 4.266 | 5.580 |
| 5.423 | 5.070 | 5.290 | 5.572 | 5.606 | 6.264 |

|       |       |       |       |       |       |
|-------|-------|-------|-------|-------|-------|
| 4.374 | 4.430 | 4.562 | 4.466 | 4.683 | 3.434 |
| 4.257 | 4.420 | 4.204 | 4.338 | 4.142 | 4.909 |
| 6.493 | 4.175 | 4.336 | 5.091 | 4.909 | 4.728 |
| 4.420 | 4.993 | 4.893 | 4.626 | 4.531 | 4.923 |
| 4.089 | 3.993 | 2.921 | 4.022 | 4.292 | 4.012 |
| 4.856 | 4.605 | 4.237 | 4.409 | 4.289 | 4.336 |
| 4.854 | 4.616 | 4.192 | 4.537 | 4.332 | 4.546 |
| 5.688 | 5.555 | 5.599 | 5.459 | 5.630 | 3.164 |
| 3.342 | 3.302 | 3.159 | 3.723 | 3.805 | 4.359 |
| 2.997 | 3.241 | 3.129 | 2.901 | 3.513 | 3.362 |
| 6.821 | 6.447 | 6.597 | 6.673 | 6.515 | 5.822 |
| 5.798 | 6.017 | 5.922 | 5.987 | 5.735 | 4.469 |
| 6.021 | 5.894 | 6.104 | 6.019 | 6.257 | 7.284 |
| 6.717 | 6.146 | 5.626 | 5.757 | 6.450 | 6.267 |
| 4.027 | 4.419 | 4.032 | 3.732 | 4.387 | 4.866 |
| 3.159 | 2.632 | 2.390 | 3.432 | 2.874 | 3.479 |
| 2.516 | 2.118 | 2.809 | 2.588 | 2.568 | 3.083 |
| 2.091 | 2.948 | 2.238 | 2.086 | 2.375 | 2.573 |
| 2.646 | 3.055 | 2.268 | 1.345 | 1.133 | 2.615 |
| 5.599 | 5.706 | 5.555 | 5.162 | 6.007 | 4.913 |
| 4.238 | 2.581 | 3.841 | 4.706 | 3.964 | 5.191 |
| 2.690 | 2.306 | 2.613 | 2.000 | 1.886 | 2.013 |
| 2.405 | 1.973 | 2.312 | 2.246 | 2.392 | 2.305 |
| 3.862 | 3.771 | 4.093 | 3.282 | 3.816 | 3.612 |
| 2.827 | 2.789 | 3.287 | 2.176 | 2.195 | 3.370 |
| 3.080 | 3.990 | 2.520 | 3.387 | 3.800 | 3.709 |
| 3.376 | 4.682 | 4.973 | 4.493 | 4.131 | 5.253 |
| 6.972 | 6.538 | 6.986 | 6.811 | 6.607 | 3.697 |
| 3.205 | 3.140 | 3.205 | 4.394 | 3.020 | 4.339 |
| 3.589 | 2.438 | 3.250 | 3.159 | 2.850 | 2.967 |
| 4.173 | 2.884 | 3.020 | 3.615 | 3.241 | 4.424 |
| 3.047 | 2.013 | 3.641 | 1.991 | 3.017 | 2.134 |
| 3.921 | 3.531 | 3.510 | 2.882 | 3.430 | 2.012 |
| 3.123 | 2.928 | 2.627 | 3.473 | 3.205 | 3.117 |
| 4.969 | 4.725 | 4.989 | 4.192 | 4.769 | 5.322 |
| 4.698 | 4.296 | 4.014 | 4.634 | 3.174 | 4.112 |
| 6.862 | 5.985 | 5.957 | 7.574 | 5.764 | 7.215 |
| 2.377 | 3.599 | 3.009 | 3.517 | 3.475 | 3.015 |
| 3.260 | 3.884 | 3.968 | 4.083 | 3.864 | 2.300 |
| 1.986 | 3.064 | 2.445 | 2.704 | 2.244 | 2.559 |
| 3.342 | 3.813 | 3.461 | 3.128 | 3.461 | 3.196 |
| 3.403 | 2.829 | 2.542 | 2.215 | 2.723 | 2.653 |
| 2.665 | 2.207 | 3.477 | 1.789 | 2.230 | 1.166 |
| 3.176 | 1.566 | 2.668 | 2.517 | 2.888 | 2.795 |
| 2.328 | 3.196 | 2.869 | 3.016 | 3.630 | 3.320 |
| 3.948 | 3.634 | 3.568 | 3.594 | 3.182 | 3.441 |
| 2.837 | 1.203 | 2.790 | 3.389 | 1.833 | 4.198 |
| 3.982 | 4.345 | 4.588 | 4.972 | 4.602 | 5.834 |
| 3.081 | 2.097 | 3.086 | 3.691 | 3.074 | 2.260 |
| 3.232 | 3.024 | 2.579 | 2.813 | 3.334 | 2.304 |

|       |       |       |       |       |       |
|-------|-------|-------|-------|-------|-------|
| 4.312 | 3.389 | 4.241 | 3.627 | 4.141 | 3.734 |
| 1.608 | 1.975 | 2.352 | 2.865 | 2.701 | 2.913 |
| 3.955 | 3.834 | 3.951 | 4.091 | 3.309 | 3.511 |
| 4.355 | 3.188 | 4.051 | 4.297 | 2.963 | 3.741 |
| 3.128 | 2.842 | 3.466 | 2.626 | 2.687 | 3.579 |
| 5.185 | 5.552 | 5.108 | 4.647 | 5.713 | 5.446 |
| 2.460 | 2.479 | 2.596 | 2.574 | 2.539 | 2.450 |
| 4.423 | 4.083 | 4.710 | 4.572 | 4.975 | 5.573 |
| 3.057 | 2.101 | 2.656 | 3.087 | 3.141 | 3.565 |
| 2.407 | 2.602 | 1.848 | 2.259 | 2.212 | 2.237 |
| 3.384 | 4.576 | 3.393 | 3.837 | 3.456 | 2.820 |
| 2.895 | 3.087 | 2.919 | 2.805 | 4.109 | 2.500 |
| 2.744 | 1.828 | 1.714 | 3.197 | 3.026 | 1.943 |
| 2.961 | 1.718 | 2.011 | 2.846 | 3.025 | 2.040 |
| 3.601 | 2.181 | 3.343 | 3.259 | 2.257 | 2.049 |
| 2.138 | 2.007 | 3.095 | 2.879 | 3.073 | 1.750 |
| 3.544 | 3.781 | 4.495 | 4.569 | 3.826 | 4.384 |
| 3.222 | 2.453 | 3.147 | 2.448 | 2.754 | 2.403 |
| 4.325 | 3.855 | 3.874 | 3.870 | 3.823 | 5.700 |
| 2.911 | 2.587 | 2.519 | 2.458 | 2.134 | 2.182 |
| 1.438 | 2.984 | 2.054 | 1.535 | 2.541 | 2.841 |
| 3.736 | 4.061 | 3.274 | 3.013 | 3.906 | 1.773 |
| 2.241 | 2.102 | 1.637 | 2.197 | 2.478 | 3.610 |
| 4.302 | 4.825 | 4.359 | 4.508 | 4.470 | 3.804 |
| 1.498 | 1.340 | 1.404 | 1.726 | 0.970 | 1.360 |
| 3.291 | 3.365 | 3.093 | 3.957 | 2.999 | 2.565 |
| 2.839 | 2.574 | 2.111 | 2.247 | 3.349 | 2.422 |
| 2.832 | 2.788 | 2.616 | 3.504 | 2.685 | 4.032 |
| 3.076 | 2.635 | 3.601 | 2.282 | 2.970 | 2.935 |
| 4.897 | 3.632 | 4.188 | 4.654 | 4.377 | 4.938 |
| 3.871 | 3.971 | 3.093 | 2.885 | 3.367 | 3.237 |
| 2.732 | 3.005 | 2.214 | 1.768 | 2.911 | 2.357 |
| 3.458 | 3.486 | 3.909 | 3.089 | 3.224 | 3.268 |
| 3.456 | 3.411 | 3.153 | 3.474 | 3.546 | 3.114 |
| 4.193 | 4.348 | 3.755 | 3.842 | 3.088 | 2.039 |
| 3.290 | 2.722 | 2.761 | 4.102 | 3.531 | 3.483 |
| 3.718 | 3.746 | 2.827 | 3.615 | 3.623 | 3.583 |
| 4.359 | 3.072 | 3.557 | 3.421 | 3.783 | 4.246 |
| 2.896 | 3.326 | 2.967 | 3.972 | 3.567 | 4.287 |
| 4.001 | 2.991 | 4.383 | 3.528 | 3.495 | 4.283 |
| 3.327 | 4.688 | 3.315 | 3.706 | 3.179 | 3.537 |
| 4.781 | 5.169 | 4.489 | 4.393 | 4.615 | 4.993 |
| 2.358 | 2.662 | 2.650 | 2.853 | 2.637 | 2.034 |
| 2.888 | 2.387 | 3.020 | 1.871 | 2.759 | 3.271 |
| 4.073 | 3.399 | 3.516 | 3.993 | 3.564 | 3.904 |
| 4.014 | 5.081 | 4.838 | 4.393 | 4.503 | 3.998 |
| 2.871 | 3.128 | 2.546 | 2.552 | 3.352 | 3.017 |
| 2.585 | 3.671 | 3.248 | 2.293 | 2.739 | 3.035 |
| 2.200 | 2.455 | 2.198 | 1.887 | 3.012 | 2.590 |
| 2.935 | 3.541 | 3.267 | 3.128 | 3.869 | 2.725 |

|       |       |       |       |       |       |
|-------|-------|-------|-------|-------|-------|
| 2.558 | 2.417 | 2.616 | 2.487 | 1.540 | 2.417 |
| 5.813 | 5.397 | 5.523 | 5.473 | 5.278 | 5.454 |
| 1.977 | 1.514 | 1.357 | 2.412 | 2.228 | 2.654 |
| 2.793 | 2.610 | 1.943 | 2.783 | 2.247 | 2.783 |
| 3.580 | 3.206 | 3.887 | 3.653 | 3.573 | 3.337 |
| 2.245 | 2.682 | 1.991 | 2.332 | 2.649 | 3.811 |
| 3.648 | 3.426 | 3.466 | 4.008 | 2.396 | 3.935 |
| 5.213 | 4.275 | 4.457 | 4.536 | 4.709 | 6.225 |
| 4.498 | 4.091 | 3.541 | 4.498 | 3.847 | 4.897 |
| 3.476 | 4.195 | 3.779 | 1.857 | 4.190 | 3.369 |
| 2.124 | 2.032 | 1.994 | 2.247 | 2.410 | 4.198 |
| 3.099 | 3.355 | 2.599 | 2.382 | 3.280 | 3.204 |
| 2.344 | 2.913 | 2.332 | 1.886 | 3.093 | 2.547 |
| 4.483 | 3.912 | 4.031 | 4.104 | 4.442 | 4.428 |
| 1.918 | 1.607 | 1.586 | 1.865 | 2.148 | 2.401 |
| 6.210 | 4.983 | 5.493 | 6.035 | 5.538 | 6.208 |
| 3.548 | 2.975 | 3.403 | 3.958 | 4.315 | 3.175 |
| 1.985 | 2.954 | 2.380 | 2.033 | 2.467 | 1.894 |
| 2.936 | 1.888 | 2.816 | 3.090 | 1.690 | 2.833 |
| 2.704 | 2.750 | 2.247 | 3.457 | 2.423 | 3.953 |
| 1.178 | 1.378 | 1.438 | 2.546 | 1.953 | 2.901 |
| 3.058 | 1.981 | 1.728 | 2.082 | 2.285 | 2.755 |
| 2.510 | 2.554 | 2.142 | 2.696 | 2.014 | 3.095 |
| 3.045 | 2.908 | 4.098 | 2.816 | 4.102 | 3.992 |
| 3.506 | 4.130 | 4.348 | 3.787 | 3.743 | 3.908 |
| 1.183 | 1.581 | 1.653 | 1.829 | 1.334 | 1.508 |
| 5.480 | 4.525 | 3.606 | 5.038 | 4.864 | 5.169 |
| 3.689 | 3.663 | 2.955 | 4.879 | 3.221 | 6.305 |
| 0.596 | 2.909 | 0.696 | 0.952 | 1.960 | 2.824 |
| 7.049 | 6.826 | 6.263 | 6.412 | 6.422 | 6.734 |
| 6.134 | 6.421 | 4.247 | 6.238 | 5.587 | 6.193 |
| 2.646 | 2.726 | 3.144 | 2.449 | 1.772 | 2.653 |
| 2.907 | 2.782 | 4.561 | 4.130 | 3.539 | 4.068 |
| 2.772 | 3.630 | 2.951 | 2.645 | 3.555 | 3.314 |
| 2.633 | 1.986 | 2.177 | 2.588 | 2.591 | 3.232 |
| 4.079 | 3.786 | 3.788 | 4.006 | 4.323 | 3.844 |
| 2.156 | 1.849 | 2.769 | 3.050 | 2.688 | 2.660 |
| 4.313 | 2.782 | 3.866 | 4.364 | 3.359 | 2.758 |
| 3.770 | 3.505 | 3.650 | 3.434 | 4.059 | 2.226 |
| 2.644 | 3.120 | 3.373 | 2.839 | 2.753 | 2.569 |
| 4.059 | 3.785 | 4.381 | 3.600 | 3.790 | 4.338 |
| 2.473 | 3.120 | 3.502 | 3.475 | 2.680 | 2.961 |
| 3.879 | 3.369 | 3.992 | 3.037 | 3.825 | 3.221 |
| 1.894 | 2.628 | 2.833 | 2.117 | 2.765 | 2.001 |
| 6.032 | 5.772 | 5.696 | 6.491 | 5.693 | 6.677 |
| 3.454 | 3.535 | 2.970 | 4.000 | 2.139 | 2.324 |
| 5.079 | 4.806 | 4.494 | 4.768 | 4.689 | 5.444 |
| 6.123 | 6.196 | 6.262 | 6.719 | 6.597 | 7.830 |
| 3.604 | 2.658 | 2.919 | 3.475 | 2.037 | 3.956 |
| 3.965 | 2.216 | 3.759 | 2.947 | 3.800 | 4.296 |

|       |       |       |       |       |       |
|-------|-------|-------|-------|-------|-------|
| 2.027 | 2.389 | 2.854 | 3.316 | 2.262 | 3.162 |
| 1.930 | 1.731 | 2.857 | 1.940 | 1.842 | 1.945 |
| 3.385 | 2.765 | 2.552 | 3.114 | 2.125 | 2.675 |
| 0.945 | 1.184 | 0.792 | 1.201 | 1.042 | 1.566 |
| 4.361 | 4.910 | 4.405 | 5.017 | 4.496 | 5.198 |
| 3.842 | 3.756 | 4.070 | 4.737 | 4.296 | 5.624 |
| 3.032 | 2.712 | 3.232 | 2.645 | 3.049 | 3.078 |
| 2.409 | 3.170 | 2.833 | 1.837 | 2.726 | 2.531 |
| 5.208 | 5.107 | 4.869 | 5.162 | 4.643 | 3.988 |
| 3.414 | 1.357 | 3.284 | 3.974 | 1.118 | 0.722 |
| 3.020 | 2.283 | 1.793 | 1.487 | 1.437 | 1.793 |
| 3.380 | 3.272 | 4.969 | 3.139 | 3.773 | 3.704 |
| 3.298 | 3.435 | 3.188 | 4.588 | 2.332 | 3.540 |
| 3.178 | 2.494 | 1.732 | 2.151 | 2.120 | 3.209 |
| 4.272 | 3.968 | 3.528 | 3.830 | 4.150 | 3.893 |
| 3.141 | 3.243 | 3.474 | 3.503 | 3.844 | 4.007 |
| 1.696 | 1.366 | 2.232 | 2.106 | 2.360 | 3.102 |
| 2.236 | 2.163 | 2.152 | 1.082 | 2.406 | 2.831 |
| 3.287 | 2.810 | 2.763 | 2.661 | 2.268 | 3.416 |
| 3.441 | 3.152 | 2.817 | 2.956 | 3.128 | 3.393 |
| 3.451 | 3.765 | 2.283 | 3.720 | 2.167 | 3.537 |
| 3.369 | 1.813 | 2.494 | 3.299 | 2.074 | 3.203 |
| 4.604 | 3.728 | 4.286 | 4.521 | 4.627 | 4.640 |
| 2.460 | 3.504 | 2.754 | 2.824 | 3.778 | 2.289 |
| 2.886 | 3.462 | 3.009 | 3.833 | 4.346 | 3.320 |
| 4.038 | 3.526 | 3.146 | 4.917 | 4.380 | 3.838 |
| 3.261 | 2.020 | 1.785 | 3.210 | 1.713 | 3.877 |
| 4.115 | 2.585 | 2.185 | 3.389 | 2.613 | 4.162 |
| 4.064 | 2.534 | 2.484 | 3.283 | 2.936 | 4.030 |
| 2.053 | 2.382 | 3.028 | 2.382 | 2.905 | 2.756 |
| 4.000 | 3.905 | 4.133 | 4.781 | 4.874 | 6.799 |
| 1.736 | 2.502 | 3.243 | 3.494 | 2.765 | 2.225 |
| 3.082 | 3.399 | 2.690 | 3.616 | 3.200 | 2.922 |
| 2.782 | 2.073 | 2.080 | 1.879 | 1.965 | 2.315 |
| 5.312 | 5.423 | 6.541 | 7.115 | 5.810 | 7.002 |
| 3.992 | 4.109 | 3.210 | 3.693 | 4.134 | 4.167 |
| 2.412 | 2.811 | 2.215 | 2.389 | 3.104 | 2.756 |
| 4.155 | 4.506 | 5.309 | 4.568 | 3.983 | 4.746 |
| 3.760 | 3.990 | 4.191 | 4.388 | 4.563 | 6.821 |
| 1.567 | 1.893 | 2.026 | 2.143 | 2.364 | 4.341 |
| 4.288 | 3.729 | 3.706 | 4.521 | 3.759 | 4.084 |
| 2.210 | 3.026 | 2.945 | 2.582 | 2.179 | 1.782 |
| 2.669 | 3.487 | 3.238 | 2.401 | 3.212 | 2.624 |
| 4.602 | 3.483 | 3.455 | 4.246 | 3.671 | 4.477 |
| 6.550 | 6.196 | 6.101 | 6.455 | 5.895 | 4.078 |
| 2.035 | 1.445 | 2.703 | 2.984 | 2.621 | 2.837 |
| 3.390 | 2.568 | 2.175 | 2.504 | 2.908 | 4.160 |
| 2.977 | 3.634 | 3.619 | 3.348 | 3.252 | 4.266 |
| 3.631 | 3.701 | 3.358 | 3.971 | 3.783 | 2.302 |
| 3.830 | 3.030 | 3.865 | 3.822 | 1.625 | 2.344 |

|       |       |       |       |       |       |
|-------|-------|-------|-------|-------|-------|
| 3.170 | 2.174 | 2.250 | 3.312 | 2.730 | 2.963 |
| 4.118 | 3.820 | 2.764 | 4.353 | 3.964 | 5.266 |
| 4.109 | 3.768 | 3.950 | 4.559 | 3.726 | 3.115 |
| 2.759 | 2.802 | 2.899 | 2.696 | 2.589 | 3.838 |
| 4.998 | 4.243 | 4.459 | 4.594 | 4.342 | 5.161 |
| 1.785 | 1.954 | 2.513 | 1.920 | 2.400 | 3.675 |
| 1.977 | 3.676 | 2.611 | 3.814 | 3.033 | 2.303 |
| 2.956 | 2.825 | 2.442 | 1.811 | 3.124 | 2.634 |
| 2.163 | 3.150 | 2.893 | 2.469 | 3.328 | 2.809 |
| 4.329 | 4.270 | 4.371 | 4.321 | 3.404 | 4.020 |
| 2.437 | 2.620 | 2.179 | 2.544 | 2.620 | 2.458 |
| 5.600 | 5.001 | 6.889 | 5.959 | 6.721 | 3.750 |
| 2.763 | 2.533 | 3.778 | 3.800 | 2.938 | 3.734 |
| 3.484 | 3.920 | 4.145 | 4.053 | 4.137 | 3.009 |
| 2.086 | 2.080 | 0.865 | 1.207 | 1.465 | 2.235 |
| 2.161 | 1.897 | 2.091 | 1.745 | 1.579 | 2.295 |
| 6.500 | 5.265 | 5.585 | 6.342 | 5.540 | 3.808 |
| 1.948 | 2.637 | 2.043 | 2.642 | 2.841 | 4.015 |
| 2.631 | 3.061 | 2.498 | 2.876 | 3.130 | 4.262 |
| 3.184 | 3.465 | 4.279 | 3.687 | 4.239 | 3.960 |
| 1.918 | 4.042 | 2.835 | 2.067 | 3.383 | 1.059 |
| 4.980 | 4.556 | 4.702 | 4.673 | 5.233 | 5.328 |
| 3.978 | 3.044 | 3.593 | 3.403 | 3.624 | 3.977 |
| 2.836 | 1.805 | 2.635 | 2.021 | 2.835 | 1.912 |
| 2.224 | 2.158 | 3.189 | 2.482 | 2.241 | 2.441 |
| 2.383 | 2.665 | 2.723 | 2.578 | 2.562 | 3.600 |
| 6.832 | 7.141 | 7.122 | 6.807 | 7.141 | 6.323 |
| 9.874 | 9.763 | 9.588 | 9.586 | 9.435 | 6.859 |
| 5.587 | 4.744 | 5.739 | 4.908 | 5.051 | 4.954 |
| 6.881 | 7.019 | 6.819 | 6.516 | 6.896 | 6.298 |
| 2.664 | 3.166 | 2.957 | 3.346 | 2.955 | 2.554 |
| 4.685 | 4.810 | 4.998 | 4.232 | 4.639 | 4.108 |
| 8.572 | 8.230 | 8.172 | 8.537 | 8.168 | 9.228 |
| 5.072 | 4.295 | 5.384 | 5.159 | 4.192 | 1.720 |
| 5.064 | 3.850 | 3.654 | 4.335 | 4.639 | 4.380 |
| 9.038 | 9.520 | 9.520 | 9.314 | 9.560 | 7.762 |
| 6.766 | 6.502 | 6.500 | 6.555 | 6.287 | 5.513 |
| 3.742 | 4.834 | 3.488 | 4.024 | 3.742 | 3.616 |
| 4.372 | 4.387 | 4.634 | 4.169 | 4.993 | 4.061 |
| 5.248 | 5.352 | 5.549 | 5.089 | 5.610 | 6.041 |
| 7.645 | 7.981 | 8.117 | 7.539 | 7.683 | 6.488 |
| 4.984 | 4.332 | 4.419 | 4.945 | 5.206 | 5.815 |
| 2.232 | 2.346 | 2.130 | 2.255 | 2.188 | 2.217 |
| 2.851 | 3.213 | 3.603 | 3.007 | 3.012 | 2.927 |
| 3.521 | 3.799 | 4.269 | 2.994 | 3.859 | 4.674 |
| 7.029 | 6.580 | 6.857 | 6.852 | 6.564 | 5.244 |
| 4.536 | 4.095 | 4.807 | 4.407 | 4.255 | 3.361 |
| 3.738 | 3.021 | 3.642 | 3.167 | 2.948 | 4.366 |
| 5.384 | 5.596 | 5.447 | 5.301 | 5.181 | 3.632 |
| 1.668 | 2.160 | 1.712 | 1.577 | 1.830 | 3.266 |

|       |       |       |       |       |       |
|-------|-------|-------|-------|-------|-------|
| 4.411 | 4.286 | 4.542 | 4.360 | 4.356 | 5.740 |
| 3.188 | 2.962 | 3.180 | 3.437 | 3.252 | 3.398 |
| 2.624 | 1.789 | 1.620 | 2.974 | 2.021 | 2.070 |
| 2.906 | 2.513 | 2.376 | 2.244 | 1.919 | 2.737 |
| 2.509 | 2.651 | 1.975 | 2.125 | 2.482 | 2.783 |
| 4.641 | 4.617 | 4.739 | 4.464 | 5.237 | 3.928 |
| 3.847 | 3.949 | 3.869 | 3.037 | 3.616 | 3.972 |
| 5.151 | 5.119 | 5.315 | 5.123 | 4.994 | 4.913 |
| 7.246 | 7.368 | 7.570 | 7.397 | 7.491 | 6.522 |
| 6.934 | 6.713 | 7.246 | 6.764 | 6.795 | 7.461 |
| 6.250 | 6.401 | 6.330 | 6.002 | 6.813 | 8.517 |
| 2.208 | 1.964 | 1.821 | 2.186 | 2.233 | 3.779 |
| 5.836 | 6.171 | 6.536 | 6.967 | 7.299 | 9.671 |
| 8.594 | 8.711 | 8.666 | 8.436 | 8.745 | 8.111 |
| 4.051 | 4.884 | 4.785 | 4.624 | 4.566 | 3.621 |
| 5.713 | 7.274 | 6.822 | 7.315 | 7.620 | 9.241 |
| 5.788 | 7.358 | 6.840 | 7.355 | 7.552 | 9.264 |
| 3.731 | 4.165 | 3.915 | 3.987 | 4.012 | 3.793 |
| 3.378 | 2.994 | 2.937 | 3.267 | 2.812 | 2.923 |
| 4.737 | 4.699 | 4.841 | 5.134 | 5.325 | 5.049 |
| 3.817 | 3.851 | 4.119 | 4.192 | 3.975 | 5.240 |
| 3.739 | 3.720 | 4.244 | 4.154 | 3.978 | 3.215 |
| 3.529 | 3.776 | 3.347 | 3.429 | 3.668 | 2.307 |
| 4.778 | 5.331 | 5.200 | 5.060 | 4.818 | 3.819 |
| 4.337 | 5.073 | 4.997 | 4.677 | 5.113 | 3.870 |
| 4.846 | 5.203 | 5.394 | 5.732 | 5.440 | 6.432 |
| 6.350 | 6.065 | 6.448 | 6.226 | 6.496 | 2.678 |
| 7.942 | 8.108 | 7.888 | 7.577 | 7.895 | 6.963 |
| 4.118 | 4.167 | 3.855 | 3.508 | 3.967 | 4.950 |
| 4.837 | 5.201 | 5.299 | 4.993 | 5.085 | 4.735 |
| 3.903 | 4.417 | 4.673 | 4.338 | 4.527 | 4.501 |
| 7.956 | 7.923 | 7.672 | 7.539 | 7.592 | 7.132 |
| 5.374 | 5.298 | 5.053 | 5.387 | 4.689 | 3.413 |
| 6.718 | 6.706 | 6.863 | 6.514 | 6.882 | 3.187 |
| 4.139 | 4.076 | 4.422 | 4.444 | 3.935 | 5.333 |
| 2.750 | 2.051 | 2.328 | 2.352 | 2.565 | 2.742 |
| 2.921 | 1.772 | 2.018 | 2.641 | 2.233 | 3.453 |
| 3.939 | 3.161 | 2.536 | 3.635 | 2.464 | 2.152 |
| 3.517 | 3.542 | 3.920 | 3.730 | 3.865 | 3.675 |
| 5.504 | 6.122 | 5.683 | 5.883 | 5.858 | 3.716 |
| 6.371 | 4.672 | 5.255 | 4.570 | 4.577 | 3.722 |
| 6.079 | 4.475 | 4.947 | 4.291 | 4.297 | 3.258 |
| 3.071 | 3.708 | 3.101 | 2.723 | 3.690 | 4.948 |
| 3.819 | 4.048 | 4.019 | 4.071 | 4.341 | 3.406 |
| 7.533 | 7.422 | 7.762 | 7.658 | 7.496 | 6.879 |
| 3.760 | 4.856 | 4.234 | 4.566 | 3.841 | 4.255 |
| 3.238 | 3.464 | 3.179 | 3.335 | 3.366 | 3.539 |
| 4.904 | 5.304 | 4.749 | 5.216 | 4.341 | 5.164 |
| 6.607 | 5.884 | 6.084 | 6.129 | 6.265 | 6.944 |
| 4.364 | 4.345 | 4.727 | 4.454 | 4.099 | 3.854 |

|       |        |        |        |        |       |
|-------|--------|--------|--------|--------|-------|
| 6.979 | 6.849  | 6.873  | 6.781  | 6.999  | 6.243 |
| 6.607 | 6.548  | 6.707  | 6.512  | 6.486  | 6.121 |
| 5.269 | 5.392  | 6.061  | 5.378  | 6.022  | 4.667 |
| 6.894 | 6.856  | 6.891  | 7.044  | 6.686  | 6.188 |
| 4.572 | 5.676  | 5.158  | 4.990  | 5.263  | 4.216 |
| 6.537 | 7.012  | 6.791  | 6.858  | 6.730  | 5.768 |
| 5.765 | 6.364  | 6.076  | 6.062  | 6.203  | 5.960 |
| 7.019 | 7.005  | 7.141  | 6.999  | 7.110  | 6.278 |
| 3.815 | 3.905  | 4.219  | 4.022  | 3.695  | 3.819 |
| 5.005 | 5.259  | 5.542  | 5.323  | 5.240  | 4.917 |
| 9.984 | 10.103 | 10.236 | 10.110 | 10.021 | 9.498 |
| 7.439 | 7.356  | 7.473  | 7.536  | 7.269  | 6.221 |
| 3.744 | 3.951  | 4.079  | 3.791  | 3.775  | 4.361 |
| 2.968 | 3.696  | 3.203  | 3.071  | 3.048  | 2.394 |
| 4.334 | 4.741  | 3.799  | 4.657  | 4.728  | 4.645 |
| 6.251 | 6.060  | 5.904  | 6.127  | 6.418  | 5.403 |
| 5.029 | 5.659  | 5.544  | 5.299  | 5.624  | 4.874 |
| 6.251 | 6.798  | 6.700  | 6.356  | 6.429  | 6.975 |
| 3.733 | 2.665  | 2.893  | 2.171  | 2.598  | 3.678 |
| 3.120 | 2.434  | 3.005  | 1.669  | 2.981  | 2.511 |
| 3.381 | 3.387  | 3.782  | 2.213  | 2.538  | 3.228 |
| 5.230 | 4.367  | 4.822  | 4.151  | 4.291  | 4.341 |
| 6.072 | 6.102  | 6.105  | 6.174  | 6.056  | 5.634 |
| 6.371 | 6.609  | 6.755  | 6.566  | 6.529  | 5.803 |
| 2.505 | 2.716  | 2.296  | 2.594  | 2.991  | 3.724 |
| 2.658 | 3.706  | 3.153  | 3.634  | 3.846  | 4.399 |
| 6.857 | 6.485  | 6.526  | 6.914  | 6.911  | 8.036 |
| 1.748 | 3.044  | 3.044  | 2.792  | 2.223  | 2.525 |
| 7.136 | 7.967  | 7.447  | 6.839  | 7.136  | 7.128 |
| 8.907 | 8.214  | 7.984  | 7.737  | 8.039  | 9.503 |
| 1.707 | 1.963  | 2.258  | 1.921  | 1.927  | 1.564 |
| 5.041 | 3.722  | 3.962  | 4.662  | 3.929  | 3.564 |
| 2.327 | 2.374  | 3.169  | 2.684  | 2.537  | 2.127 |
| 3.656 | 2.615  | 2.894  | 3.585  | 2.102  | 1.831 |
| 2.544 | 2.887  | 3.048  | 3.067  | 2.602  | 2.876 |
| 5.930 | 4.300  | 4.516  | 4.438  | 4.989  | 3.363 |
| 6.681 | 5.697  | 6.671  | 6.411  | 6.158  | 6.090 |
| 5.041 | 2.952  | 4.146  | 4.662  | 4.826  | 5.971 |
| 6.208 | 5.638  | 7.175  | 6.819  | 6.278  | 7.381 |
| 5.856 | 5.518  | 6.830  | 6.757  | 6.573  | 5.674 |
| 2.429 | 2.789  | 2.120  | 2.972  | 2.161  | 2.077 |
| 3.791 | 3.113  | 4.389  | 3.725  | 4.280  | 2.691 |
| 7.949 | 7.911  | 8.325  | 7.519  | 8.077  | 7.117 |
| 9.931 | 8.810  | 9.752  | 9.207  | 9.471  | 9.554 |
| 6.517 | 6.101  | 6.430  | 6.596  | 6.663  | 6.042 |
| 4.583 | 4.767  | 4.344  | 4.754  | 4.466  | 3.602 |
| 4.673 | 4.666  | 4.744  | 5.186  | 5.045  | 4.860 |
| 3.823 | 4.349  | 4.471  | 4.209  | 4.177  | 4.722 |
| 4.392 | 5.331  | 5.085  | 5.054  | 5.068  | 3.957 |
| 3.605 | 3.258  | 2.755  | 3.292  | 3.391  | 1.995 |



|        |       |        |       |       |        |
|--------|-------|--------|-------|-------|--------|
| 2.745  | 3.119 | 2.518  | 2.946 | 2.825 | 3.810  |
| 3.727  | 3.903 | 3.438  | 3.484 | 3.771 | 4.547  |
| 3.864  | 3.795 | 4.024  | 3.992 | 4.249 | 4.363  |
| 7.511  | 7.757 | 7.467  | 7.910 | 8.003 | 9.475  |
| 4.222  | 4.517 | 4.314  | 3.645 | 4.374 | 4.487  |
| 7.021  | 7.134 | 6.921  | 7.081 | 6.859 | 6.473  |
| 7.519  | 7.789 | 7.908  | 7.466 | 7.437 | 7.233  |
| 6.688  | 7.144 | 7.129  | 6.942 | 6.411 | 6.742  |
| 6.604  | 6.428 | 6.492  | 6.286 | 5.945 | 6.570  |
| 5.819  | 6.099 | 5.786  | 5.911 | 5.957 | 5.188  |
| 2.383  | 2.132 | 2.782  | 2.801 | 3.583 | 3.848  |
| 4.559  | 4.860 | 4.622  | 4.496 | 4.774 | 4.828  |
| 6.695  | 7.080 | 6.873  | 6.872 | 6.723 | 5.972  |
| 4.482  | 5.301 | 4.238  | 4.487 | 4.343 | 3.961  |
| 3.570  | 2.686 | 3.476  | 3.855 | 3.725 | 3.892  |
| 6.574  | 6.532 | 6.464  | 6.199 | 5.459 | 6.348  |
| 6.038  | 6.172 | 6.139  | 6.261 | 6.352 | 7.263  |
| 7.652  | 7.226 | 7.075  | 7.367 | 7.489 | 7.686  |
| 10.297 | 9.853 | 10.493 | 9.728 | 9.453 | 10.146 |
| 3.821  | 2.354 | 4.574  | 2.961 | 2.506 | 2.269  |
| 7.320  | 6.347 | 7.323  | 7.940 | 6.680 | 5.712  |
| 7.924  | 7.184 | 8.035  | 7.688 | 7.393 | 7.350  |
| 5.821  | 4.583 | 5.596  | 5.246 | 4.558 | 1.903  |
| 6.792  | 5.984 | 6.907  | 6.911 | 6.283 | 5.945  |
| 9.386  | 8.412 | 9.332  | 9.033 | 8.993 | 8.353  |
| 8.058  | 7.317 | 8.574  | 7.599 | 7.199 | 7.834  |
| 3.835  | 3.423 | 4.044  | 3.358 | 2.739 | 2.795  |
| 8.650  | 8.483 | 8.544  | 8.106 | 7.728 | 8.222  |
| 6.638  | 5.805 | 6.320  | 5.828 | 5.883 | 4.283  |
| 7.638  | 7.511 | 7.542  | 7.359 | 7.429 | 7.329  |
| 9.536  | 9.346 | 9.775  | 9.701 | 8.596 | 8.614  |
| 2.866  | 4.450 | 4.770  | 4.592 | 4.238 | 2.965  |
| 5.143  | 4.976 | 4.870  | 4.746 | 4.870 | 4.854  |
| 4.697  | 4.817 | 4.796  | 4.877 | 5.093 | 6.346  |
| 5.690  | 4.782 | 4.982  | 5.290 | 4.679 | 3.262  |
| 6.352  | 6.773 | 6.679  | 6.919 | 6.695 | 5.998  |
| 3.211  | 3.875 | 3.340  | 2.872 | 2.673 | 3.090  |
| 2.845  | 3.851 | 3.665  | 4.501 | 3.124 | 4.090  |
| 5.355  | 5.606 | 6.500  | 5.826 | 5.457 | 2.168  |
| 3.508  | 4.003 | 3.870  | 4.213 | 3.890 | 4.222  |
| 5.525  | 5.280 | 5.371  | 5.862 | 6.038 | 7.403  |
| 4.661  | 5.604 | 5.273  | 4.862 | 5.124 | 5.433  |
| 3.457  | 4.458 | 3.490  | 3.921 | 3.611 | 5.026  |
| 4.344  | 5.392 | 5.087  | 4.585 | 5.292 | 5.664  |
| 2.909  | 2.727 | 2.620  | 2.389 | 2.942 | 2.897  |
| 6.454  | 6.145 | 6.214  | 5.904 | 6.111 | 5.506  |
| 6.113  | 6.135 | 6.101  | 6.195 | 6.066 | 6.024  |
| 3.750  | 3.984 | 3.893  | 3.848 | 4.313 | 5.083  |
| 2.834  | 2.662 | 2.897  | 3.797 | 3.156 | 2.086  |
| 2.502  | 3.110 | 2.339  | 2.204 | 1.924 | 1.985  |

|       |       |       |       |       |       |
|-------|-------|-------|-------|-------|-------|
| 3.958 | 2.787 | 2.356 | 2.689 | 3.416 | 2.967 |
| 8.882 | 8.922 | 8.902 | 8.754 | 8.773 | 7.669 |
| 2.825 | 3.377 | 4.153 | 3.831 | 3.908 | 3.860 |
| 3.194 | 3.262 | 3.387 | 2.858 | 3.419 | 3.189 |
| 7.746 | 7.703 | 7.779 | 7.783 | 7.704 | 6.361 |
| 6.899 | 5.329 | 4.442 | 6.371 | 6.993 | 5.383 |
| 4.373 | 4.739 | 4.239 | 4.548 | 4.845 | 5.632 |
| 3.917 | 3.468 | 3.236 | 3.237 | 3.639 | 3.816 |
| 2.722 | 3.145 | 3.174 | 2.315 | 1.404 | 2.555 |
| 2.320 | 2.879 | 2.323 | 2.741 | 3.887 | 3.131 |
| 7.032 | 5.711 | 4.863 | 6.416 | 6.419 | 5.290 |
| 5.406 | 6.079 | 5.480 | 5.752 | 5.848 | 5.840 |
| 3.814 | 4.321 | 4.184 | 4.188 | 4.279 | 5.711 |
| 3.070 | 2.894 | 2.753 | 2.711 | 2.762 | 2.333 |
| 4.133 | 3.134 | 3.405 | 3.694 | 3.186 | 2.826 |
| 3.810 | 3.414 | 3.233 | 3.693 | 4.196 | 5.106 |
| 5.376 | 5.516 | 5.672 | 5.328 | 5.500 | 4.216 |
| 2.526 | 2.853 | 2.647 | 2.464 | 3.067 | 4.113 |
| 6.321 | 6.284 | 5.807 | 6.066 | 5.952 | 4.868 |
| 5.558 | 5.151 | 5.156 | 5.486 | 5.235 | 5.329 |
| 5.448 | 5.501 | 5.305 | 5.865 | 6.272 | 7.715 |
| 5.088 | 5.715 | 5.703 | 5.888 | 5.922 | 7.311 |
| 4.211 | 4.772 | 4.698 | 4.062 | 3.988 | 5.245 |
| 2.644 | 2.812 | 2.515 | 1.925 | 2.757 | 2.413 |
| 9.492 | 9.581 | 9.565 | 9.676 | 9.613 | 8.153 |
| 4.068 | 4.372 | 4.206 | 4.420 | 4.914 | 2.760 |
| 4.158 | 3.149 | 3.223 | 3.736 | 3.542 | 5.448 |
| 7.634 | 7.855 | 7.859 | 7.570 | 7.580 | 6.906 |
| 6.407 | 6.170 | 5.811 | 6.392 | 6.644 | 7.763 |
| 5.208 | 4.633 | 5.010 | 4.612 | 4.988 | 5.994 |
| 4.176 | 3.338 | 3.892 | 4.135 | 3.691 | 5.565 |
| 4.007 | 4.029 | 4.586 | 5.061 | 4.611 | 3.298 |
| 2.174 | 1.505 | 2.262 | 2.392 | 2.690 | 3.386 |
| 4.173 | 4.270 | 4.606 | 3.601 | 4.207 | 3.092 |
| 4.573 | 5.093 | 4.952 | 5.549 | 5.920 | 7.233 |
| 6.042 | 6.690 | 6.098 | 6.068 | 6.399 | 4.617 |
| 7.059 | 7.186 | 7.043 | 7.459 | 7.301 | 6.902 |
| 8.387 | 8.317 | 8.177 | 8.199 | 8.288 | 5.622 |
| 4.578 | 4.863 | 4.907 | 4.846 | 5.039 | 3.842 |
| 5.640 | 6.099 | 5.721 | 5.993 | 5.862 | 4.830 |
| 6.218 | 5.025 | 5.204 | 6.303 | 5.757 | 6.856 |
| 2.001 | 2.424 | 3.191 | 3.410 | 3.279 | 1.995 |
| 6.670 | 6.989 | 6.855 | 6.525 | 6.812 | 5.845 |
| 4.574 | 4.122 | 4.215 | 4.871 | 4.352 | 4.166 |
| 3.654 | 3.809 | 3.425 | 3.294 | 2.894 | 3.316 |
| 3.186 | 3.244 | 3.555 | 3.676 | 3.955 | 3.875 |
| 4.971 | 5.101 | 4.736 | 5.572 | 5.509 | 6.385 |
| 3.956 | 4.431 | 3.749 | 2.874 | 3.380 | 3.169 |
| 6.756 | 6.801 | 6.502 | 6.546 | 6.729 | 7.408 |
| 5.629 | 5.506 | 5.782 | 5.670 | 5.657 | 5.108 |

|       |        |       |       |        |       |
|-------|--------|-------|-------|--------|-------|
| 4.281 | 2.787  | 3.399 | 4.461 | 3.373  | 3.286 |
| 4.985 | 5.071  | 5.313 | 5.044 | 4.675  | 5.376 |
| 3.681 | 4.432  | 4.030 | 4.114 | 4.511  | 4.530 |
| 5.701 | 6.047  | 6.044 | 6.080 | 5.838  | 4.934 |
| 5.288 | 6.277  | 5.677 | 6.110 | 6.025  | 7.674 |
| 8.411 | 8.013  | 7.956 | 7.742 | 7.834  | 6.816 |
| 8.547 | 8.866  | 8.605 | 8.612 | 8.471  | 6.715 |
| 8.148 | 8.356  | 8.288 | 8.444 | 8.313  | 6.996 |
| 8.232 | 8.688  | 8.778 | 8.764 | 8.862  | 7.532 |
| 3.790 | 3.678  | 3.664 | 3.387 | 3.370  | 3.499 |
| 9.084 | 9.463  | 9.142 | 9.316 | 9.429  | 7.254 |
| 7.368 | 7.581  | 7.383 | 7.459 | 7.261  | 6.972 |
| 8.307 | 8.721  | 8.518 | 8.414 | 8.627  | 7.606 |
| 2.625 | 4.500  | 4.399 | 3.617 | 2.878  | 4.550 |
| 5.208 | 5.207  | 4.992 | 5.672 | 5.556  | 6.117 |
| 4.484 | 4.492  | 4.814 | 4.543 | 4.142  | 3.740 |
| 7.693 | 7.799  | 7.994 | 7.798 | 7.881  | 6.932 |
| 6.309 | 5.660  | 5.552 | 6.167 | 6.305  | 7.677 |
| 5.184 | 5.005  | 5.093 | 5.452 | 5.334  | 4.587 |
| 2.604 | 2.700  | 2.151 | 2.818 | 2.970  | 3.260 |
| 2.912 | 2.791  | 2.614 | 3.079 | 2.766  | 3.817 |
| 2.311 | 1.369  | 1.426 | 1.724 | 2.211  | 3.160 |
| 8.364 | 8.498  | 8.451 | 8.583 | 8.498  | 6.747 |
| 4.570 | 4.373  | 4.911 | 5.950 | 5.265  | 6.293 |
| 7.412 | 7.273  | 7.045 | 7.593 | 7.117  | 8.287 |
| 7.247 | 6.976  | 6.766 | 7.356 | 6.855  | 8.062 |
| 5.967 | 4.867  | 5.304 | 5.730 | 5.149  | 6.265 |
| 6.529 | 6.105  | 6.213 | 6.504 | 6.078  | 7.061 |
| 2.157 | 1.554  | 2.036 | 2.417 | 1.776  | 3.330 |
| 8.226 | 6.543  | 6.486 | 7.577 | 7.111  | 8.587 |
| 6.435 | 5.232  | 5.462 | 6.357 | 5.648  | 7.039 |
| 8.298 | 7.436  | 7.488 | 8.057 | 7.505  | 8.833 |
| 5.374 | 5.643  | 4.746 | 5.548 | 4.077  | 5.382 |
| 3.578 | 3.401  | 3.517 | 3.559 | 3.704  | 3.350 |
| 4.095 | 3.948  | 3.503 | 4.160 | 4.077  | 3.105 |
| 8.769 | 8.574  | 8.861 | 8.750 | 8.808  | 8.694 |
| 7.617 | 7.132  | 7.124 | 7.607 | 7.602  | 5.296 |
| 4.612 | 4.961  | 4.713 | 5.127 | 5.147  | 5.786 |
| 6.206 | 6.321  | 6.197 | 6.059 | 6.399  | 5.644 |
| 7.792 | 7.166  | 7.510 | 7.327 | 7.411  | 6.073 |
| 7.339 | 7.270  | 7.390 | 7.149 | 7.310  | 5.223 |
| 2.789 | 3.418  | 3.418 | 2.289 | 1.603  | 4.280 |
| 4.138 | 4.605  | 4.799 | 3.701 | 4.307  | 4.707 |
| 3.749 | 4.040  | 4.374 | 3.599 | 3.984  | 3.964 |
| 3.004 | 3.011  | 3.179 | 3.219 | 3.775  | 4.181 |
| 7.091 | 7.364  | 7.173 | 7.221 | 7.528  | 6.210 |
| 9.982 | 10.012 | 9.925 | 9.983 | 10.054 | 9.013 |
| 4.365 | 5.407  | 4.875 | 4.234 | 4.273  | 5.803 |
| 4.294 | 4.435  | 4.354 | 5.049 | 5.173  | 6.099 |
| 2.308 | 1.807  | 2.798 | 2.795 | 2.644  | 4.745 |

|        |        |        |        |        |        |
|--------|--------|--------|--------|--------|--------|
| 6.665  | 6.450  | 6.532  | 6.512  | 6.220  | 5.281  |
| 2.407  | 2.681  | 2.046  | 2.314  | 2.592  | 3.064  |
| 6.356  | 5.238  | 6.272  | 5.991  | 5.582  | 6.271  |
| 7.593  | 8.118  | 7.828  | 7.541  | 7.870  | 7.109  |
| 5.569  | 5.847  | 5.717  | 5.748  | 5.189  | 3.921  |
| 2.988  | 1.159  | 2.781  | 2.958  | 2.527  | 1.076  |
| 4.894  | 1.876  | 4.793  | 5.350  | 4.741  | 1.704  |
| 8.666  | 8.588  | 8.780  | 8.610  | 8.569  | 6.760  |
| 8.313  | 8.287  | 7.985  | 8.049  | 7.643  | 8.212  |
| 6.277  | 5.965  | 5.874  | 6.789  | 6.632  | 8.287  |
| 8.254  | 8.473  | 8.295  | 8.417  | 8.369  | 7.247  |
| 7.693  | 7.818  | 7.775  | 7.830  | 7.937  | 7.103  |
| 7.534  | 7.812  | 7.448  | 7.291  | 7.419  | 6.033  |
| 3.676  | 4.554  | 4.172  | 4.673  | 4.521  | 4.096  |
| 2.101  | 2.337  | 2.211  | 1.537  | 2.410  | 4.072  |
| 5.259  | 5.253  | 5.994  | 5.557  | 5.692  | 5.592  |
| 5.224  | 4.682  | 4.747  | 5.164  | 5.486  | 6.331  |
| 6.042  | 5.874  | 5.699  | 6.263  | 5.894  | 6.808  |
| 7.898  | 8.462  | 8.210  | 7.937  | 7.865  | 6.913  |
| 8.360  | 8.223  | 8.318  | 8.582  | 8.744  | 7.342  |
| 5.905  | 6.210  | 6.196  | 6.249  | 6.292  | 6.976  |
| 5.982  | 5.684  | 6.171  | 5.866  | 5.387  | 2.998  |
| 1.833  | 2.279  | 1.750  | 2.151  | 1.749  | 2.996  |
| 5.095  | 4.919  | 5.030  | 5.157  | 5.227  | 4.132  |
| 3.874  | 3.473  | 4.042  | 3.565  | 2.911  | 2.031  |
| 7.444  | 7.627  | 7.759  | 7.463  | 7.751  | 7.093  |
| 4.106  | 4.988  | 4.903  | 4.185  | 4.698  | 3.910  |
| 4.365  | 4.761  | 4.605  | 4.507  | 4.472  | 3.554  |
| 5.711  | 5.936  | 5.926  | 5.765  | 5.710  | 5.225  |
| 5.251  | 5.720  | 5.700  | 5.604  | 5.897  | 4.524  |
| 9.198  | 9.466  | 7.532  | 8.486  | 8.615  | 10.423 |
| 3.278  | 2.874  | 2.989  | 2.770  | 3.093  | 3.507  |
| 2.768  | 3.263  | 2.937  | 3.223  | 3.254  | 3.350  |
| 8.776  | 8.697  | 8.641  | 8.904  | 8.666  | 7.411  |
| 6.428  | 6.165  | 6.419  | 6.861  | 6.452  | 4.349  |
| 5.434  | 4.533  | 4.811  | 4.323  | 4.502  | 4.288  |
| 7.941  | 8.010  | 8.278  | 8.154  | 7.897  | 6.914  |
| 4.607  | 4.715  | 4.887  | 4.664  | 4.655  | 5.732  |
| 4.909  | 5.041  | 5.431  | 5.301  | 5.160  | 5.345  |
| 7.850  | 7.717  | 7.960  | 7.903  | 7.733  | 5.851  |
| 8.304  | 9.236  | 8.561  | 8.739  | 8.958  | 8.798  |
| 11.013 | 11.364 | 10.959 | 11.087 | 11.152 | 10.538 |
| 10.443 | 10.608 | 10.506 | 10.410 | 10.532 | 10.007 |
| 8.598  | 8.386  | 8.300  | 8.348  | 8.626  | 6.515  |
| 3.553  | 2.459  | 2.165  | 3.037  | 2.406  | 2.046  |
| 4.458  | 4.118  | 4.313  | 4.457  | 4.279  | 2.909  |
| 3.281  | 4.207  | 4.070  | 3.632  | 4.312  | 5.517  |
| 2.426  | 2.409  | 2.547  | 2.376  | 2.558  | 2.815  |
| 5.848  | 6.036  | 5.976  | 6.276  | 6.258  | 6.892  |
| 5.553  | 5.592  | 5.898  | 6.051  | 5.407  | 3.110  |

|       |       |       |       |       |       |
|-------|-------|-------|-------|-------|-------|
| 7.622 | 7.522 | 7.594 | 7.593 | 7.330 | 5.586 |
| 4.985 | 4.979 | 5.036 | 5.181 | 5.222 | 5.778 |
| 4.910 | 4.471 | 4.100 | 4.341 | 4.394 | 5.470 |
| 5.667 | 5.887 | 5.711 | 5.725 | 5.870 | 6.421 |
| 7.602 | 8.005 | 7.756 | 7.879 | 7.869 | 4.750 |
| 7.226 | 7.214 | 7.315 | 7.263 | 7.335 | 4.854 |
| 5.822 | 5.384 | 5.910 | 5.750 | 6.101 | 3.803 |
| 3.302 | 3.042 | 4.079 | 2.943 | 2.856 | 2.635 |
| 5.431 | 5.201 | 5.678 | 5.447 | 5.328 | 4.934 |
| 2.716 | 2.843 | 1.705 | 3.154 | 1.990 | 1.356 |
| 5.796 | 5.667 | 5.734 | 5.947 | 6.095 | 2.673 |
| 6.172 | 6.608 | 6.722 | 6.764 | 6.613 | 1.527 |
| 6.870 | 7.021 | 6.824 | 6.702 | 6.828 | 6.157 |
| 3.551 | 2.809 | 3.377 | 2.698 | 3.412 | 3.270 |
| 4.028 | 3.211 | 3.234 | 3.233 | 3.527 | 4.146 |
| 3.750 | 3.878 | 3.655 | 3.539 | 4.192 | 4.624 |
| 3.062 | 3.200 | 2.681 | 2.669 | 2.862 | 3.211 |
| 6.264 | 6.168 | 6.523 | 6.263 | 6.382 | 6.866 |
| 1.690 | 1.497 | 1.370 | 1.032 | 1.607 | 2.647 |
| 2.089 | 2.136 | 2.441 | 2.030 | 1.863 | 4.142 |
| 6.552 | 5.520 | 5.325 | 5.200 | 5.662 | 4.312 |
| 3.147 | 2.886 | 3.038 | 2.413 | 2.705 | 3.500 |
| 7.090 | 6.628 | 6.505 | 6.637 | 6.750 | 6.764 |
| 3.462 | 3.185 | 3.517 | 3.396 | 3.416 | 3.442 |
| 4.832 | 4.566 | 4.019 | 4.169 | 4.288 | 5.004 |
| 3.832 | 2.779 | 3.489 | 3.066 | 3.755 | 3.097 |
| 6.400 | 5.951 | 5.595 | 5.053 | 6.272 | 4.089 |
| 2.817 | 2.872 | 1.989 | 2.520 | 2.556 | 3.927 |
| 9.732 | 9.439 | 9.529 | 9.449 | 9.475 | 8.664 |
| 4.464 | 5.257 | 4.260 | 4.536 | 4.407 | 4.322 |
| 3.843 | 3.344 | 3.073 | 2.522 | 3.023 | 2.761 |
| 5.001 | 5.486 | 5.516 | 5.760 | 5.459 | 6.148 |
| 5.203 | 4.905 | 5.468 | 4.861 | 4.770 | 3.863 |
| 3.994 | 3.572 | 3.486 | 3.704 | 3.598 | 4.928 |
| 4.282 | 3.514 | 3.780 | 3.836 | 3.582 | 3.046 |
| 6.840 | 6.780 | 6.976 | 6.677 | 6.813 | 5.905 |
| 5.406 | 4.888 | 4.695 | 4.253 | 4.715 | 4.618 |
| 3.397 | 3.644 | 3.339 | 3.371 | 3.307 | 4.102 |
| 5.428 | 5.146 | 5.351 | 5.592 | 5.089 | 4.083 |
| 4.800 | 5.132 | 5.067 | 4.325 | 4.733 | 5.425 |
| 2.915 | 3.159 | 3.716 | 2.908 | 3.491 | 4.603 |
| 3.447 | 3.633 | 3.630 | 4.221 | 4.169 | 3.811 |
| 5.651 | 5.893 | 5.772 | 5.437 | 5.621 | 5.180 |
| 6.386 | 5.610 | 6.452 | 6.904 | 6.394 | 3.931 |
| 6.648 | 7.122 | 6.895 | 6.798 | 6.955 | 7.759 |
| 2.329 | 2.450 | 2.145 | 2.803 | 2.884 | 4.730 |
| 5.961 | 6.355 | 6.218 | 6.128 | 6.480 | 5.647 |
| 4.591 | 6.112 | 5.573 | 5.698 | 5.319 | 3.545 |
| 3.615 | 3.526 | 3.604 | 4.054 | 3.756 | 4.448 |
| 7.724 | 7.948 | 8.151 | 7.878 | 8.132 | 9.264 |

|       |       |        |       |       |       |
|-------|-------|--------|-------|-------|-------|
| 6.364 | 6.196 | 5.849  | 6.503 | 6.279 | 6.079 |
| 2.658 | 2.349 | 2.832  | 3.020 | 2.492 | 3.084 |
| 4.633 | 4.300 | 4.504  | 4.722 | 4.659 | 5.624 |
| 2.699 | 2.791 | 2.714  | 2.108 | 2.494 | 2.837 |
| 4.707 | 5.016 | 4.859  | 5.057 | 5.109 | 4.498 |
| 4.799 | 5.068 | 4.650  | 4.617 | 4.713 | 3.609 |
| 4.584 | 4.548 | 4.666  | 4.900 | 4.988 | 6.572 |
| 3.216 | 3.400 | 2.614  | 3.072 | 3.848 | 2.888 |
| 2.259 | 2.418 | 2.403  | 2.151 | 2.235 | 2.208 |
| 5.173 | 5.506 | 5.260  | 5.598 | 6.338 | 7.563 |
| 4.717 | 5.118 | 5.300  | 4.728 | 5.017 | 4.689 |
| 6.528 | 6.104 | 6.302  | 6.465 | 6.249 | 5.581 |
| 2.216 | 2.467 | 2.794  | 3.066 | 2.164 | 2.442 |
| 9.862 | 9.924 | 10.094 | 9.759 | 9.970 | 8.483 |
| 2.378 | 2.316 | 3.170  | 2.196 | 2.745 | 2.702 |
| 2.454 | 2.618 | 2.138  | 2.587 | 1.950 | 4.073 |
| 3.103 | 3.518 | 1.907  | 3.035 | 3.490 | 3.008 |
| 4.177 | 3.998 | 3.607  | 3.748 | 3.902 | 4.840 |
| 3.308 | 3.884 | 3.285  | 2.716 | 3.570 | 4.820 |
| 3.852 | 4.512 | 4.319  | 4.667 | 4.656 | 3.292 |
| 4.593 | 2.952 | 3.825  | 3.837 | 3.963 | 3.111 |
| 3.049 | 3.348 | 3.399  | 2.786 | 3.482 | 2.390 |
| 8.653 | 8.645 | 8.628  | 8.582 | 8.810 | 6.300 |
| 3.888 | 4.500 | 4.241  | 4.458 | 4.924 | 3.524 |
| 4.851 | 5.047 | 5.042  | 5.010 | 4.636 | 4.677 |
| 2.389 | 2.107 | 2.679  | 1.685 | 1.688 | 2.290 |
| 6.931 | 6.822 | 6.672  | 6.145 | 6.904 | 3.624 |
| 2.737 | 2.847 | 2.043  | 2.386 | 2.660 | 2.307 |
| 8.414 | 8.279 | 8.366  | 8.278 | 8.172 | 7.609 |
| 5.780 | 6.372 | 6.185  | 5.950 | 6.045 | 5.780 |
| 3.719 | 3.734 | 3.911  | 3.889 | 3.926 | 4.561 |
| 1.626 | 1.660 | 1.938  | 1.593 | 1.590 | 1.819 |
| 3.953 | 4.513 | 4.429  | 4.010 | 4.167 | 4.265 |
| 7.200 | 7.302 | 7.378  | 7.218 | 7.024 | 5.494 |
| 4.802 | 4.834 | 4.994  | 4.904 | 5.168 | 4.556 |
| 7.859 | 7.758 | 7.875  | 7.814 | 7.610 | 7.173 |
| 9.935 | 9.921 | 9.850  | 9.826 | 9.988 | 9.113 |
| 9.976 | 9.880 | 9.776  | 9.750 | 9.970 | 9.119 |
| 2.974 | 3.823 | 3.399  | 3.748 | 3.374 | 4.459 |
| 4.991 | 4.937 | 4.410  | 4.755 | 5.132 | 3.715 |
| 3.403 | 3.589 | 3.399  | 3.612 | 3.613 | 1.783 |
| 4.921 | 3.774 | 3.461  | 4.025 | 4.017 | 4.308 |
| 2.372 | 3.508 | 2.568  | 3.129 | 3.204 | 2.946 |
| 5.714 | 5.661 | 5.458  | 6.036 | 5.788 | 7.004 |
| 5.816 | 4.973 | 4.441  | 5.389 | 4.354 | 6.073 |
| 6.997 | 6.628 | 7.096  | 7.099 | 6.756 | 7.355 |
| 4.104 | 4.808 | 3.936  | 4.322 | 4.365 | 3.812 |
| 6.583 | 5.661 | 5.938  | 5.626 | 6.284 | 2.987 |
| 5.633 | 5.601 | 5.835  | 5.506 | 5.477 | 4.745 |
| 3.972 | 4.319 | 3.816  | 4.157 | 4.853 | 2.995 |

|       |       |       |       |       |       |
|-------|-------|-------|-------|-------|-------|
| 2.711 | 2.386 | 2.388 | 2.652 | 2.729 | 2.246 |
| 2.187 | 2.504 | 2.016 | 2.102 | 1.903 | 4.045 |
| 2.052 | 2.733 | 2.752 | 2.358 | 3.069 | 2.005 |
| 5.337 | 5.124 | 5.175 | 5.337 | 5.218 | 6.371 |
| 2.144 | 2.236 | 1.975 | 1.709 | 2.350 | 2.387 |
| 6.771 | 6.929 | 6.451 | 6.887 | 7.113 | 8.319 |
| 7.508 | 7.490 | 7.956 | 7.291 | 7.605 | 9.281 |
| 2.913 | 2.453 | 2.878 | 3.563 | 3.234 | 4.329 |
| 3.254 | 2.215 | 3.006 | 2.422 | 3.565 | 3.064 |
| 8.628 | 8.309 | 8.086 | 8.938 | 8.717 | 9.524 |
| 7.962 | 7.616 | 7.019 | 8.400 | 8.089 | 9.203 |
| 7.027 | 7.060 | 6.689 | 7.188 | 6.965 | 7.692 |
| 8.315 | 7.865 | 7.604 | 8.647 | 8.288 | 9.269 |
| 8.770 | 8.386 | 8.205 | 9.045 | 8.600 | 9.681 |
| 8.669 | 8.263 | 8.142 | 8.876 | 8.594 | 9.502 |
| 5.640 | 4.427 | 4.692 | 5.702 | 4.921 | 6.083 |
| 7.175 | 6.894 | 6.649 | 7.309 | 7.020 | 8.084 |
| 4.545 | 4.548 | 4.731 | 4.859 | 4.686 | 6.714 |
| 5.624 | 5.880 | 5.527 | 6.059 | 5.935 | 3.584 |
| 3.869 | 3.705 | 4.028 | 3.166 | 3.474 | 3.087 |
| 3.680 | 2.920 | 3.649 | 3.037 | 3.757 | 2.954 |
| 2.156 | 2.945 | 3.085 | 2.448 | 2.407 | 1.731 |
| 4.848 | 5.693 | 5.686 | 5.306 | 5.702 | 5.178 |
| 2.218 | 2.407 | 2.814 | 3.174 | 2.802 | 2.737 |
| 9.479 | 9.477 | 9.447 | 9.429 | 9.306 | 7.939 |
| 7.810 | 7.397 | 7.839 | 7.698 | 7.672 | 7.003 |
| 5.384 | 5.445 | 5.750 | 5.561 | 5.582 | 4.531 |
| 6.801 | 6.614 | 6.687 | 6.441 | 6.435 | 5.236 |
| 2.836 | 2.685 | 2.573 | 2.784 | 2.211 | 2.463 |
| 4.215 | 4.689 | 4.344 | 5.255 | 4.937 | 2.519 |
| 6.435 | 5.858 | 6.251 | 6.128 | 6.051 | 2.923 |
| 4.152 | 3.941 | 4.987 | 3.992 | 4.258 | 2.792 |
| 3.378 | 3.655 | 3.871 | 3.519 | 3.313 | 2.056 |
| 5.941 | 6.043 | 6.316 | 5.430 | 5.868 | 5.949 |
| 5.813 | 5.482 | 5.343 | 5.977 | 5.464 | 5.433 |
| 7.390 | 7.202 | 7.314 | 6.633 | 6.872 | 5.440 |
| 6.733 | 6.722 | 6.825 | 6.747 | 6.692 | 6.125 |
| 6.021 | 4.832 | 5.506 | 5.352 | 5.831 | 1.194 |
| 5.303 | 4.932 | 5.181 | 5.282 | 5.221 | 4.317 |
| 2.726 | 2.539 | 2.518 | 1.674 | 2.402 | 2.455 |
| 5.798 | 5.637 | 5.659 | 5.485 | 5.100 | 4.985 |
| 6.529 | 6.316 | 6.424 | 6.303 | 6.154 | 5.571 |
| 3.974 | 4.116 | 3.498 | 3.355 | 3.670 | 3.628 |
| 3.895 | 4.555 | 4.762 | 4.581 | 5.038 | 3.077 |
| 3.113 | 2.601 | 3.035 | 2.156 | 2.765 | 1.451 |
| 5.631 | 6.189 | 6.139 | 5.891 | 6.081 | 5.654 |
| 5.492 | 5.338 | 5.267 | 5.572 | 5.480 | 6.975 |
| 9.087 | 9.319 | 9.142 | 9.193 | 9.167 | 8.592 |
| 3.639 | 3.156 | 3.624 | 3.784 | 3.870 | 2.897 |
| 4.344 | 4.612 | 4.490 | 4.920 | 4.836 | 4.611 |

|       |        |        |       |        |       |
|-------|--------|--------|-------|--------|-------|
| 3.620 | 2.848  | 3.247  | 4.090 | 3.042  | 3.341 |
| 2.849 | 2.335  | 2.641  | 3.293 | 2.733  | 2.607 |
| 2.492 | 2.477  | 2.730  | 2.832 | 2.414  | 2.103 |
| 5.519 | 5.852  | 5.660  | 5.866 | 5.530  | 5.509 |
| 3.098 | 3.231  | 3.752  | 4.022 | 3.874  | 3.178 |
| 9.453 | 9.205  | 9.409  | 9.288 | 9.356  | 4.263 |
| 4.642 | 5.388  | 4.981  | 5.152 | 4.916  | 4.453 |
| 6.310 | 6.333  | 6.466  | 6.022 | 6.639  | 4.844 |
| 9.494 | 10.121 | 10.029 | 9.979 | 10.008 | 7.791 |
| 6.528 | 6.095  | 6.637  | 6.011 | 6.799  | 4.603 |
| 4.467 | 4.169  | 4.170  | 4.262 | 3.804  | 4.675 |
| 6.455 | 6.557  | 6.029  | 6.557 | 6.653  | 4.256 |
| 5.801 | 6.449  | 6.336  | 6.041 | 6.519  | 4.582 |
| 8.755 | 8.344  | 8.336  | 8.561 | 8.373  | 6.733 |
| 7.806 | 7.638  | 7.657  | 7.633 | 7.608  | 6.702 |
| 3.531 | 2.675  | 4.720  | 4.638 | 2.758  | 4.205 |
| 9.504 | 9.527  | 9.408  | 9.456 | 9.236  | 8.572 |
| 9.757 | 9.740  | 9.567  | 9.636 | 9.468  | 8.464 |
| 3.681 | 3.447  | 3.718  | 3.442 | 3.605  | 3.358 |
| 7.998 | 7.628  | 7.677  | 7.647 | 7.606  | 6.398 |
| 4.532 | 4.594  | 4.467  | 5.085 | 4.194  | 5.107 |
| 3.978 | 3.755  | 3.893  | 3.825 | 3.714  | 4.899 |
| 3.709 | 4.064  | 4.119  | 4.470 | 4.318  | 2.590 |
| 7.040 | 7.486  | 7.259  | 6.988 | 7.008  | 6.188 |
| 6.103 | 6.421  | 6.216  | 6.594 | 6.444  | 7.315 |
| 6.817 | 7.113  | 6.719  | 6.745 | 6.503  | 5.702 |
| 4.561 | 3.744  | 4.475  | 4.455 | 4.574  | 4.944 |
| 2.502 | 2.383  | 2.115  | 2.460 | 2.520  | 3.915 |
| 3.719 | 3.365  | 3.137  | 3.379 | 3.146  | 4.688 |
| 1.974 | 2.040  | 3.005  | 2.400 | 2.457  | 2.125 |
| 5.979 | 6.848  | 6.713  | 6.248 | 6.464  | 4.729 |
| 5.633 | 5.778  | 6.101  | 5.647 | 6.077  | 4.356 |
| 4.964 | 5.147  | 4.916  | 4.620 | 5.061  | 4.902 |
| 6.037 | 5.619  | 6.004  | 6.048 | 6.131  | 6.920 |
| 7.676 | 7.788  | 7.818  | 7.740 | 8.014  | 6.046 |
| 3.617 | 3.279  | 3.331  | 2.538 | 3.156  | 3.503 |
| 2.859 | 3.032  | 3.081  | 2.812 | 2.846  | 3.532 |
| 4.155 | 5.100  | 5.279  | 4.888 | 5.033  | 3.954 |
| 6.587 | 6.619  | 6.648  | 6.450 | 6.083  | 2.964 |
| 2.011 | 2.350  | 2.553  | 2.679 | 2.504  | 2.735 |
| 3.404 | 3.194  | 3.525  | 2.962 | 3.159  | 3.578 |
| 3.929 | 4.498  | 4.659  | 4.440 | 4.378  | 4.624 |
| 8.552 | 9.044  | 8.706  | 8.684 | 8.715  | 8.316 |
| 9.754 | 9.656  | 9.985  | 9.786 | 9.734  | 9.095 |
| 3.257 | 3.957  | 3.701  | 3.206 | 3.506  | 2.132 |
| 3.107 | 4.055  | 3.873  | 3.829 | 3.005  | 2.095 |
| 3.875 | 2.952  | 3.654  | 3.813 | 2.860  | 3.151 |
| 5.293 | 5.033  | 5.396  | 5.664 | 5.508  | 4.381 |
| 5.631 | 5.667  | 5.839  | 5.553 | 5.626  | 4.265 |
| 6.260 | 6.462  | 6.529  | 6.319 | 6.479  | 6.164 |



|       |       |       |       |       |       |
|-------|-------|-------|-------|-------|-------|
| 6.166 | 5.726 | 6.752 | 5.191 | 6.715 | 7.648 |
| 3.224 | 3.069 | 3.244 | 3.431 | 2.967 | 2.126 |
| 2.081 | 2.125 | 2.203 | 2.035 | 1.760 | 1.568 |
| 3.907 | 3.334 | 3.437 | 3.698 | 4.832 | 4.542 |
| 3.894 | 3.717 | 3.919 | 4.294 | 4.204 | 4.469 |
| 4.833 | 4.436 | 5.342 | 5.233 | 4.464 | 2.043 |
| 1.817 | 2.414 | 2.877 | 2.087 | 2.030 | 2.511 |
| 6.712 | 6.979 | 6.541 | 6.566 | 7.172 | 7.273 |
| 5.589 | 6.472 | 6.145 | 5.885 | 6.251 | 4.653 |
| 3.117 | 4.108 | 3.645 | 4.135 | 3.854 | 3.063 |
| 4.661 | 4.187 | 4.828 | 4.608 | 5.070 | 3.152 |
| 2.937 | 3.435 | 3.503 | 3.333 | 3.663 | 2.924 |
| 4.271 | 5.053 | 4.880 | 4.334 | 5.267 | 3.607 |
| 5.265 | 5.507 | 5.668 | 5.328 | 5.377 | 2.704 |
| 3.270 | 3.405 | 3.969 | 3.548 | 3.736 | 3.743 |
| 2.435 | 2.283 | 2.201 | 2.806 | 2.693 | 1.244 |
| 4.581 | 4.341 | 4.374 | 4.491 | 4.322 | 3.422 |
| 3.885 | 4.204 | 3.974 | 4.476 | 4.163 | 5.312 |
| 2.625 | 2.501 | 2.842 | 2.544 | 3.237 | 3.451 |
| 2.929 | 3.930 | 3.549 | 3.676 | 3.703 | 3.448 |
| 2.201 | 2.975 | 3.196 | 3.131 | 3.292 | 2.499 |
| 2.575 | 1.914 | 2.343 | 1.939 | 2.622 | 1.872 |
| 4.827 | 5.446 | 5.218 | 5.342 | 5.151 | 5.615 |
| 2.070 | 2.469 | 3.095 | 2.290 | 2.137 | 2.947 |
| 4.066 | 3.679 | 3.755 | 3.763 | 3.690 | 1.122 |
| 3.958 | 4.556 | 4.107 | 4.173 | 4.319 | 4.012 |
| 3.476 | 3.721 | 2.931 | 3.225 | 3.131 | 2.515 |
| 2.204 | 1.468 | 2.134 | 2.515 | 2.581 | 2.939 |
| 2.739 | 2.732 | 2.817 | 2.838 | 2.391 | 2.838 |
| 7.474 | 7.762 | 7.524 | 7.221 | 7.318 | 6.643 |
| 5.618 | 5.878 | 5.793 | 6.148 | 5.752 | 5.568 |
| 2.492 | 2.996 | 2.556 | 1.971 | 1.855 | 2.892 |
| 7.282 | 7.033 | 7.372 | 7.231 | 7.371 | 7.009 |
| 8.142 | 8.487 | 8.180 | 8.484 | 8.383 | 9.366 |
| 6.727 | 4.369 | 4.638 | 5.206 | 6.273 | 2.326 |
| 6.034 | 5.952 | 5.575 | 5.805 | 5.954 | 4.759 |
| 6.222 | 6.371 | 6.417 | 6.440 | 6.478 | 5.760 |
| 6.126 | 6.127 | 5.864 | 5.842 | 5.884 | 4.367 |
| 7.236 | 7.170 | 6.969 | 7.117 | 6.997 | 6.179 |
| 5.872 | 6.292 | 6.161 | 5.957 | 6.063 | 3.457 |
| 2.856 | 2.904 | 2.626 | 2.789 | 2.226 | 1.771 |
| 3.281 | 2.619 | 2.432 | 2.457 | 2.594 | 2.241 |
| 3.250 | 2.963 | 2.318 | 2.904 | 2.703 | 2.365 |
| 4.120 | 3.908 | 4.321 | 4.058 | 4.007 | 3.598 |
| 3.448 | 3.350 | 3.197 | 2.902 | 3.195 | 3.465 |
| 5.471 | 4.923 | 5.403 | 6.099 | 5.991 | 6.868 |
| 3.809 | 3.566 | 3.894 | 4.072 | 4.336 | 5.200 |
| 3.382 | 4.415 | 4.311 | 3.776 | 4.248 | 5.916 |
| 5.164 | 3.311 | 3.607 | 4.380 | 4.277 | 2.925 |
| 7.078 | 7.256 | 7.354 | 7.376 | 7.224 | 6.866 |

|       |       |       |       |       |       |
|-------|-------|-------|-------|-------|-------|
| 7.137 | 7.466 | 7.307 | 7.604 | 7.430 | 6.821 |
| 5.488 | 7.091 | 7.147 | 7.127 | 7.681 | 7.637 |
| 8.170 | 8.281 | 8.104 | 8.109 | 7.898 | 5.410 |
| 5.841 | 4.248 | 5.065 | 5.909 | 4.939 | 4.755 |
| 6.280 | 4.844 | 5.101 | 6.335 | 4.928 | 4.842 |
| 3.044 | 3.664 | 2.554 | 2.369 | 3.538 | 4.088 |
| 5.533 | 5.779 | 6.094 | 5.747 | 5.947 | 3.834 |
| 3.237 | 3.680 | 2.990 | 3.285 | 2.517 | 2.670 |
| 4.282 | 5.023 | 4.655 | 4.050 | 4.176 | 2.525 |
| 4.376 | 4.702 | 4.561 | 4.204 | 4.361 | 3.331 |
| 4.415 | 4.520 | 5.188 | 4.603 | 4.381 | 3.868 |
| 4.702 | 4.476 | 4.892 | 4.274 | 4.342 | 2.961 |
| 5.304 | 4.366 | 6.024 | 4.859 | 5.203 | 1.051 |
| 1.609 | 1.196 | 1.566 | 1.700 | 1.568 | 1.892 |
| 3.203 | 2.749 | 2.900 | 3.335 | 3.285 | 3.843 |
| 3.941 | 2.691 | 2.463 | 3.439 | 2.967 | 3.944 |
| 5.053 | 4.622 | 3.951 | 5.417 | 4.726 | 5.386 |
| 6.476 | 5.442 | 5.293 | 6.629 | 5.825 | 7.626 |
| 3.460 | 3.177 | 2.132 | 4.068 | 2.737 | 4.868 |
| 2.646 | 2.618 | 2.608 | 2.902 | 2.691 | 1.620 |
| 4.719 | 1.731 | 3.013 | 4.115 | 3.362 | 4.464 |
| 4.624 | 4.034 | 2.637 | 5.003 | 4.662 | 5.520 |
| 3.148 | 2.828 | 2.432 | 3.685 | 2.634 | 3.105 |
| 2.868 | 3.372 | 3.166 | 2.995 | 2.622 | 4.065 |
| 2.858 | 2.172 | 2.275 | 2.970 | 2.477 | 4.274 |
| 1.299 | 1.437 | 3.401 | 2.952 | 2.079 | 2.532 |
| 2.692 | 1.856 | 2.414 | 3.007 | 2.202 | 2.104 |
| 3.082 | 2.121 | 2.346 | 2.194 | 2.979 | 1.178 |
| 3.887 | 3.662 | 3.048 | 3.582 | 3.695 | 3.304 |
| 1.409 | 1.075 | 1.382 | 1.894 | 1.301 | 3.625 |
| 3.205 | 3.564 | 3.201 | 3.119 | 2.598 | 2.952 |
| 3.075 | 2.695 | 2.889 | 2.262 | 2.782 | 3.047 |
| 5.917 | 6.203 | 5.886 | 6.237 | 6.147 | 4.941 |
| 6.425 | 6.338 | 6.483 | 6.349 | 6.227 | 5.782 |
| 3.732 | 3.725 | 3.519 | 3.575 | 3.351 | 2.665 |
| 4.299 | 3.733 | 4.257 | 3.945 | 3.535 | 4.898 |
| 3.727 | 3.312 | 3.026 | 3.734 | 3.709 | 2.713 |
| 6.516 | 6.573 | 6.308 | 6.731 | 6.337 | 6.808 |
| 5.946 | 6.106 | 6.113 | 6.275 | 6.447 | 5.209 |
| 6.887 | 6.605 | 6.639 | 6.792 | 6.724 | 5.630 |
| 2.583 | 2.605 | 2.392 | 2.229 | 2.624 | 2.426 |
| 4.784 | 5.179 | 5.323 | 4.909 | 4.975 | 4.137 |
| 2.947 | 3.220 | 3.591 | 3.234 | 3.049 | 3.693 |
| 2.636 | 2.435 | 2.757 | 2.642 | 3.118 | 3.221 |
| 4.253 | 4.688 | 4.099 | 4.750 | 4.443 | 5.254 |
| 2.089 | 1.401 | 1.301 | 1.574 | 1.806 | 1.690 |
| 5.657 | 6.308 | 5.717 | 4.856 | 5.528 | 4.918 |
| 8.084 | 8.383 | 8.394 | 8.007 | 8.261 | 7.435 |
| 3.752 | 2.624 | 2.997 | 2.896 | 2.811 | 2.470 |
| 3.847 | 3.398 | 4.286 | 4.355 | 4.422 | 2.016 |

|       |       |       |       |       |       |
|-------|-------|-------|-------|-------|-------|
| 3.582 | 4.078 | 3.129 | 3.834 | 3.368 | 3.477 |
| 3.542 | 3.420 | 3.610 | 2.890 | 3.410 | 2.369 |
| 5.528 | 6.245 | 5.819 | 5.499 | 5.990 | 4.636 |
| 6.304 | 6.462 | 5.870 | 6.220 | 6.246 | 6.268 |
| 5.941 | 6.256 | 6.237 | 6.151 | 6.465 | 7.796 |
| 4.315 | 4.728 | 3.964 | 4.860 | 4.200 | 3.980 |
| 2.550 | 2.138 | 2.325 | 2.328 | 2.662 | 3.332 |
| 8.167 | 8.110 | 8.042 | 8.290 | 8.371 | 7.057 |
| 2.128 | 2.460 | 2.007 | 2.678 | 2.086 | 3.149 |
| 3.652 | 2.229 | 2.446 | 1.931 | 2.440 | 1.721 |
| 7.737 | 7.790 | 7.785 | 8.038 | 7.616 | 5.614 |
| 8.539 | 8.315 | 8.751 | 8.560 | 8.566 | 6.696 |
| 3.724 | 2.717 | 3.501 | 3.347 | 3.095 | 2.708 |
| 3.212 | 3.242 | 5.541 | 3.260 | 4.375 | 3.714 |
| 1.742 | 2.140 | 2.822 | 2.645 | 2.315 | 3.734 |
| 1.971 | 2.101 | 1.853 | 1.843 | 2.150 | 2.076 |
| 2.976 | 3.083 | 2.395 | 2.743 | 3.077 | 3.196 |
| 4.450 | 3.600 | 4.227 | 4.037 | 4.395 | 3.602 |
| 4.331 | 1.135 | 3.855 | 2.264 | 3.590 | 1.078 |
| 6.082 | 5.395 | 5.653 | 6.240 | 5.991 | 6.756 |
| 5.142 | 4.283 | 4.301 | 5.387 | 5.086 | 5.955 |
| 4.760 | 6.080 | 5.613 | 5.022 | 5.034 | 6.754 |
| 4.463 | 5.021 | 4.977 | 3.830 | 3.849 | 6.110 |
| 4.324 | 4.647 | 4.425 | 4.028 | 4.266 | 4.005 |
| 6.373 | 5.238 | 6.910 | 5.999 | 6.077 | 6.709 |
| 3.124 | 2.755 | 1.676 | 2.753 | 1.882 | 3.220 |
| 2.800 | 2.926 | 2.802 | 2.967 | 2.675 | 1.582 |
| 3.700 | 4.822 | 4.152 | 4.103 | 3.950 | 2.176 |
| 2.801 | 3.135 | 3.887 | 3.900 | 3.856 | 4.076 |
| 4.525 | 3.897 | 4.586 | 4.275 | 4.044 | 3.922 |
| 2.504 | 2.103 | 2.859 | 2.800 | 2.859 | 3.654 |
| 4.980 | 5.332 | 5.203 | 5.342 | 5.383 | 6.346 |
| 7.835 | 7.772 | 8.188 | 7.775 | 7.816 | 5.975 |
| 4.611 | 5.089 | 4.744 | 4.657 | 4.988 | 5.936 |
| 7.063 | 7.240 | 6.949 | 7.159 | 7.849 | 9.457 |
| 8.900 | 9.281 | 9.044 | 9.064 | 9.113 | 8.682 |
| 4.614 | 4.614 | 4.755 | 4.368 | 4.667 | 4.091 |
| 4.521 | 4.751 | 4.551 | 4.702 | 4.712 | 5.289 |
| 2.881 | 2.799 | 2.206 | 2.493 | 2.181 | 2.000 |
| 4.934 | 6.742 | 5.807 | 5.798 | 5.930 | 5.158 |
| 6.832 | 7.371 | 7.516 | 7.713 | 8.061 | 8.901 |
| 8.821 | 8.830 | 8.673 | 8.812 | 8.442 | 6.910 |
| 5.642 | 5.948 | 6.023 | 5.815 | 5.663 | 6.462 |
| 7.232 | 7.455 | 7.371 | 7.132 | 7.340 | 5.032 |
| 6.768 | 6.846 | 6.872 | 6.806 | 6.779 | 2.593 |
| 3.350 | 3.846 | 3.536 | 3.577 | 3.491 | 4.744 |
| 5.445 | 5.161 | 5.524 | 5.537 | 5.790 | 5.089 |
| 4.787 | 4.881 | 4.807 | 4.904 | 4.516 | 5.308 |
| 7.275 | 7.471 | 7.456 | 7.309 | 7.305 | 6.573 |
| 4.803 | 5.373 | 5.147 | 4.900 | 5.573 | 6.743 |

|       |       |       |       |       |       |
|-------|-------|-------|-------|-------|-------|
| 3.455 | 3.578 | 3.483 | 3.007 | 2.971 | 2.329 |
| 5.934 | 5.930 | 6.069 | 5.516 | 6.221 | 4.622 |
| 5.321 | 6.056 | 5.325 | 5.668 | 5.519 | 4.288 |
| 5.978 | 6.017 | 5.918 | 6.152 | 5.834 | 5.333 |
| 3.698 | 2.818 | 3.382 | 3.916 | 3.703 | 3.639 |
| 2.053 | 2.449 | 1.686 | 2.098 | 2.055 | 2.912 |
| 4.744 | 5.103 | 4.964 | 4.643 | 4.518 | 3.831 |
| 5.135 | 5.322 | 5.502 | 5.612 | 5.605 | 6.590 |
| 5.141 | 4.433 | 4.329 | 4.941 | 5.192 | 4.867 |
| 6.416 | 6.696 | 6.472 | 6.630 | 7.191 | 9.102 |
| 4.247 | 4.047 | 4.085 | 4.372 | 4.781 | 5.413 |
| 5.272 | 4.981 | 4.906 | 5.016 | 5.013 | 6.168 |
| 4.489 | 4.324 | 4.115 | 4.372 | 4.527 | 5.756 |
| 5.453 | 5.576 | 5.561 | 5.036 | 5.443 | 4.030 |
| 1.616 | 1.622 | 1.971 | 1.396 | 1.615 | 2.672 |
| 3.865 | 3.193 | 3.747 | 3.686 | 3.353 | 3.261 |
| 5.484 | 5.971 | 5.592 | 5.637 | 5.358 | 4.888 |
| 6.618 | 7.030 | 6.979 | 6.320 | 7.033 | 5.987 |
| 8.983 | 9.546 | 9.156 | 8.970 | 8.995 | 7.420 |
| 3.628 | 4.531 | 4.598 | 3.984 | 4.321 | 5.005 |
| 5.254 | 6.297 | 5.765 | 5.237 | 5.715 | 5.705 |
| 5.104 | 5.406 | 5.422 | 5.327 | 5.318 | 4.381 |
| 6.323 | 6.603 | 6.701 | 6.584 | 6.587 | 8.235 |
| 3.784 | 4.464 | 4.731 | 4.391 | 4.491 | 4.481 |
| 2.583 | 3.185 | 4.143 | 3.408 | 3.698 | 3.167 |
| 5.123 | 4.871 | 5.057 | 5.224 | 4.589 | 1.755 |
| 2.781 | 2.623 | 2.902 | 2.045 | 2.592 | 2.911 |
| 1.866 | 2.451 | 1.937 | 1.444 | 1.657 | 2.084 |
| 2.772 | 2.962 | 2.619 | 2.810 | 3.061 | 4.603 |
| 1.757 | 1.508 | 1.767 | 1.378 | 1.657 | 1.870 |
| 3.066 | 2.200 | 1.805 | 1.717 | 1.658 | 1.849 |
| 2.810 | 2.522 | 2.885 | 3.469 | 3.261 | 4.026 |
| 4.476 | 4.913 | 4.749 | 4.934 | 4.974 | 5.393 |
| 4.557 | 4.114 | 3.602 | 4.158 | 3.918 | 4.931 |
| 3.926 | 3.601 | 3.412 | 3.347 | 3.578 | 5.780 |
| 4.829 | 4.556 | 4.988 | 4.656 | 5.030 | 5.610 |
| 2.637 | 3.053 | 2.808 | 3.266 | 3.395 | 3.583 |
| 3.648 | 3.703 | 3.201 | 3.075 | 3.305 | 4.341 |
| 5.686 | 5.734 | 5.470 | 5.895 | 6.393 | 7.241 |
| 6.003 | 5.346 | 5.750 | 5.552 | 5.672 | 4.777 |
| 8.069 | 8.057 | 8.086 | 8.012 | 8.240 | 7.044 |
| 5.237 | 3.303 | 5.279 | 6.252 | 6.039 | 2.320 |
| 4.613 | 4.060 | 4.310 | 4.301 | 4.514 | 4.728 |
| 5.906 | 5.612 | 5.227 | 4.771 | 5.103 | 5.015 |
| 6.500 | 5.832 | 5.990 | 5.729 | 5.616 | 4.005 |
| 2.850 | 3.057 | 3.259 | 1.989 | 3.121 | 1.523 |
| 7.242 | 6.933 | 7.276 | 6.944 | 7.076 | 5.776 |
| 6.817 | 6.656 | 6.492 | 6.260 | 6.174 | 2.470 |
| 8.769 | 8.645 | 8.862 | 8.958 | 8.858 | 9.331 |
| 6.098 | 6.556 | 6.351 | 5.994 | 6.472 | 6.095 |

|       |       |       |       |       |       |
|-------|-------|-------|-------|-------|-------|
| 6.283 | 6.159 | 6.090 | 6.199 | 6.243 | 5.676 |
| 4.944 | 4.611 | 4.687 | 4.766 | 4.321 | 3.585 |
| 5.999 | 5.653 | 6.149 | 5.631 | 5.733 | 5.351 |
| 4.676 | 5.079 | 4.983 | 5.114 | 5.064 | 5.155 |
| 3.360 | 4.196 | 3.634 | 3.995 | 4.048 | 4.260 |
| 5.735 | 5.377 | 5.179 | 5.511 | 5.352 | 5.054 |
| 4.495 | 4.408 | 4.452 | 4.622 | 4.390 | 4.460 |
| 4.028 | 4.117 | 4.550 | 4.255 | 4.364 | 4.319 |
| 5.290 | 6.449 | 5.525 | 5.416 | 5.502 | 6.009 |
| 5.132 | 5.572 | 4.349 | 5.388 | 5.101 | 5.434 |
| 4.231 | 4.692 | 3.339 | 4.844 | 4.484 | 4.814 |
| 3.054 | 2.278 | 2.001 | 2.965 | 3.515 | 2.731 |
| 3.870 | 4.092 | 4.563 | 3.913 | 4.390 | 3.489 |
| 4.147 | 3.629 | 4.110 | 4.609 | 3.904 | 5.271 |
| 6.009 | 6.026 | 5.664 | 5.926 | 5.807 | 4.961 |
| 2.432 | 2.643 | 2.940 | 2.584 | 2.357 | 3.038 |
| 1.707 | 2.995 | 1.805 | 2.040 | 1.996 | 2.420 |
| 7.235 | 7.355 | 7.604 | 7.478 | 7.498 | 4.772 |
| 6.510 | 6.847 | 6.702 | 6.586 | 6.760 | 5.816 |
| 7.847 | 7.640 | 7.793 | 7.797 | 7.665 | 6.554 |
| 3.813 | 3.435 | 3.350 | 3.668 | 3.761 | 3.213 |
| 1.977 | 1.777 | 1.921 | 1.446 | 2.436 | 1.574 |
| 2.220 | 2.189 | 1.678 | 2.128 | 1.227 | 1.920 |
| 3.954 | 4.417 | 4.103 | 4.025 | 4.830 | 2.336 |
| 5.895 | 6.748 | 6.780 | 6.321 | 6.854 | 6.327 |
| 6.224 | 6.832 | 6.595 | 7.021 | 6.666 | 3.941 |
| 6.721 | 6.398 | 6.676 | 6.038 | 6.625 | 5.785 |
| 8.063 | 7.931 | 8.027 | 8.059 | 8.083 | 7.053 |
| 3.473 | 3.980 | 3.793 | 4.023 | 4.326 | 5.969 |
| 2.142 | 3.697 | 2.184 | 2.225 | 2.854 | 1.768 |
| 6.838 | 7.342 | 7.189 | 7.012 | 7.153 | 6.690 |
| 5.103 | 5.306 | 5.251 | 5.471 | 5.406 | 4.834 |
| 6.658 | 6.821 | 6.927 | 6.754 | 6.857 | 6.464 |
| 2.335 | 3.200 | 3.235 | 2.244 | 2.632 | 4.293 |
| 4.567 | 4.610 | 3.969 | 4.666 | 5.141 | 4.251 |
| 3.692 | 4.766 | 4.360 | 5.263 | 5.207 | 5.409 |
| 5.397 | 5.113 | 5.344 | 5.107 | 5.313 | 5.826 |
| 6.558 | 5.990 | 6.582 | 6.127 | 6.248 | 4.844 |
| 3.524 | 2.254 | 2.351 | 3.149 | 2.642 | 1.932 |
| 7.648 | 7.396 | 7.832 | 7.362 | 7.548 | 5.606 |
| 7.479 | 7.315 | 7.359 | 7.448 | 7.325 | 5.093 |
| 4.693 | 4.854 | 5.021 | 5.386 | 5.400 | 6.111 |
| 6.325 | 6.102 | 6.193 | 5.503 | 5.961 | 3.262 |
| 4.533 | 4.119 | 3.728 | 4.425 | 4.064 | 4.765 |
| 5.116 | 4.884 | 5.156 | 5.349 | 4.974 | 4.094 |
| 5.438 | 5.893 | 5.601 | 5.786 | 5.779 | 4.591 |
| 5.089 | 5.007 | 4.798 | 4.934 | 4.974 | 5.647 |
| 4.761 | 4.274 | 4.491 | 4.802 | 3.816 | 3.757 |
| 4.430 | 4.385 | 3.643 | 3.520 | 4.114 | 3.114 |
| 3.850 | 4.041 | 4.151 | 4.740 | 4.699 | 4.806 |

|       |       |       |       |       |       |
|-------|-------|-------|-------|-------|-------|
| 4.624 | 4.760 | 4.801 | 4.928 | 5.016 | 4.302 |
| 6.840 | 6.516 | 6.548 | 6.979 | 6.714 | 6.411 |
| 5.463 | 5.543 | 5.468 | 6.172 | 6.259 | 7.286 |
| 7.429 | 7.570 | 7.384 | 7.253 | 7.271 | 6.679 |
| 4.394 | 4.000 | 4.222 | 4.599 | 4.259 | 5.344 |
| 3.824 | 3.967 | 4.246 | 4.462 | 4.001 | 4.732 |
| 3.934 | 2.985 | 2.824 | 4.083 | 4.130 | 3.924 |
| 6.059 | 5.379 | 5.669 | 6.215 | 5.745 | 6.300 |
| 5.111 | 4.312 | 4.657 | 4.342 | 4.139 | 4.122 |
| 4.012 | 4.040 | 4.189 | 4.357 | 4.733 | 6.045 |
| 5.922 | 4.750 | 5.224 | 5.692 | 4.953 | 6.521 |
| 5.486 | 5.065 | 5.590 | 4.785 | 4.655 | 5.752 |
| 4.359 | 4.824 | 4.520 | 4.464 | 4.519 | 3.982 |
| 5.861 | 6.386 | 6.260 | 6.332 | 6.291 | 5.585 |
| 6.655 | 6.819 | 6.963 | 6.796 | 6.700 | 5.344 |
| 6.736 | 6.513 | 5.924 | 6.770 | 6.378 | 7.639 |
| 5.822 | 4.447 | 4.663 | 4.761 | 5.088 | 5.813 |
| 3.650 | 3.587 | 3.573 | 3.756 | 3.418 | 4.946 |
| 2.904 | 3.204 | 2.856 | 2.315 | 3.103 | 3.544 |
| 4.944 | 4.157 | 4.058 | 4.405 | 4.472 | 5.120 |
| 5.537 | 5.365 | 5.714 | 5.522 | 5.494 | 3.680 |
| 5.025 | 5.201 | 5.228 | 5.097 | 5.028 | 4.628 |
| 8.074 | 8.081 | 8.035 | 8.076 | 7.908 | 7.244 |
| 3.296 | 4.185 | 4.108 | 3.135 | 3.626 | 4.299 |
| 5.644 | 6.008 | 5.394 | 5.031 | 6.091 | 6.757 |
| 8.405 | 8.650 | 8.538 | 8.791 | 8.414 | 6.978 |
| 2.503 | 2.614 | 2.196 | 2.779 | 2.974 | 2.651 |
| 7.471 | 7.034 | 7.557 | 7.224 | 7.376 | 5.606 |
| 2.130 | 2.167 | 1.935 | 2.081 | 1.634 | 1.637 |
| 6.163 | 5.412 | 5.732 | 5.769 | 5.461 | 5.104 |
| 7.465 | 7.153 | 7.177 | 7.249 | 7.294 | 5.483 |
| 3.697 | 3.396 | 3.026 | 2.754 | 3.681 | 3.172 |
| 5.735 | 5.444 | 5.557 | 5.143 | 5.321 | 4.111 |
| 3.571 | 3.211 | 3.449 | 3.308 | 3.606 | 4.231 |
| 8.367 | 8.204 | 8.171 | 7.681 | 8.015 | 7.477 |
| 7.153 | 7.196 | 6.904 | 7.297 | 7.280 | 6.291 |
| 4.130 | 4.915 | 4.762 | 4.118 | 4.647 | 3.333 |
| 6.719 | 6.499 | 6.366 | 6.500 | 6.684 | 6.779 |
| 5.548 | 5.776 | 5.685 | 5.588 | 5.746 | 4.796 |
| 1.629 | 1.901 | 1.868 | 1.667 | 1.839 | 3.286 |
| 6.144 | 5.729 | 5.651 | 5.691 | 5.832 | 5.866 |
| 4.225 | 4.620 | 3.761 | 4.168 | 4.060 | 3.892 |
| 6.095 | 6.199 | 5.738 | 6.255 | 6.016 | 6.491 |
| 2.570 | 2.274 | 2.218 | 2.421 | 2.828 | 2.708 |
| 6.795 | 7.190 | 7.249 | 6.773 | 6.991 | 6.289 |
| 3.533 | 3.606 | 3.399 | 3.535 | 3.263 | 4.528 |
| 5.432 | 4.677 | 5.156 | 4.836 | 5.165 | 5.622 |
| 7.886 | 7.854 | 7.796 | 8.111 | 7.995 | 7.920 |
| 3.702 | 4.380 | 3.443 | 3.546 | 2.889 | 3.227 |
| 4.985 | 5.236 | 5.381 | 5.245 | 5.369 | 4.599 |

|       |       |       |       |       |       |
|-------|-------|-------|-------|-------|-------|
| 5.897 | 6.043 | 5.671 | 5.802 | 6.042 | 5.657 |
| 7.462 | 7.209 | 6.774 | 6.513 | 7.078 | 7.254 |
| 4.973 | 4.879 | 4.816 | 4.852 | 4.985 | 4.128 |
| 7.605 | 7.691 | 7.982 | 7.959 | 7.663 | 7.021 |
| 7.971 | 8.149 | 8.042 | 7.912 | 7.962 | 8.793 |
| 8.207 | 8.203 | 8.265 | 8.271 | 8.021 | 7.425 |
| 3.703 | 4.134 | 4.225 | 4.033 | 4.439 | 4.983 |
| 3.404 | 4.173 | 3.295 | 4.009 | 3.503 | 3.407 |
| 5.114 | 4.913 | 5.096 | 5.148 | 4.851 | 3.841 |
| 6.922 | 6.687 | 7.134 | 6.720 | 6.595 | 6.455 |
| 4.021 | 4.223 | 4.373 | 3.958 | 4.228 | 4.121 |
| 2.785 | 2.941 | 3.518 | 3.378 | 3.542 | 3.437 |
| 5.352 | 5.504 | 5.760 | 5.838 | 5.688 | 5.094 |
| 7.171 | 6.881 | 7.230 | 6.988 | 6.818 | 5.769 |
| 4.011 | 4.463 | 4.051 | 4.107 | 4.079 | 4.713 |
| 6.447 | 5.964 | 5.863 | 5.871 | 5.591 | 6.263 |
| 7.620 | 8.068 | 7.894 | 7.696 | 7.930 | 4.683 |
| 2.602 | 2.681 | 2.105 | 2.557 | 2.390 | 2.430 |
| 6.199 | 6.487 | 6.130 | 6.148 | 6.253 | 5.177 |
| 5.366 | 5.757 | 5.392 | 5.443 | 5.495 | 6.170 |
| 5.391 | 5.154 | 5.708 | 5.722 | 5.716 | 2.506 |
| 5.880 | 5.972 | 6.078 | 6.559 | 6.141 | 7.021 |
| 6.458 | 5.976 | 5.905 | 6.039 | 6.064 | 6.597 |
| 5.236 | 4.846 | 4.889 | 5.105 | 5.599 | 5.317 |
| 1.797 | 1.945 | 1.745 | 1.729 | 1.856 | 2.065 |
| 6.485 | 6.350 | 6.438 | 6.666 | 6.261 | 6.061 |
| 5.068 | 4.962 | 4.994 | 5.094 | 5.340 | 6.381 |
| 4.775 | 4.928 | 4.865 | 5.186 | 4.942 | 6.192 |
| 5.014 | 4.887 | 4.721 | 5.164 | 4.814 | 5.944 |
| 3.254 | 3.616 | 3.534 | 3.682 | 2.758 | 4.786 |
| 3.736 | 3.870 | 3.587 | 3.754 | 3.734 | 4.242 |
| 3.203 | 3.543 | 3.518 | 3.630 | 4.059 | 4.906 |
| 3.722 | 2.768 | 2.615 | 3.409 | 3.521 | 2.666 |
| 7.529 | 7.475 | 7.310 | 8.030 | 7.923 | 8.759 |
| 7.097 | 6.883 | 6.910 | 6.983 | 6.850 | 5.673 |
| 4.390 | 3.994 | 4.302 | 4.592 | 3.893 | 4.204 |
| 4.404 | 4.483 | 4.956 | 3.950 | 4.483 | 4.624 |
| 5.386 | 5.525 | 5.719 | 5.623 | 5.360 | 4.670 |
| 4.992 | 5.957 | 5.154 | 5.602 | 5.161 | 5.079 |
| 4.021 | 2.888 | 3.733 | 3.555 | 3.396 | 5.105 |
| 8.328 | 8.071 | 8.095 | 8.069 | 8.114 | 5.753 |
| 7.289 | 7.278 | 7.443 | 7.867 | 7.636 | 8.360 |
| 4.197 | 4.131 | 4.083 | 4.053 | 4.237 | 5.422 |
| 3.803 | 5.487 | 4.680 | 3.088 | 3.555 | 1.564 |
| 3.054 | 2.327 | 2.871 | 2.781 | 3.190 | 4.179 |
| 7.307 | 7.863 | 7.634 | 7.407 | 7.593 | 6.802 |
| 4.337 | 3.530 | 2.989 | 3.833 | 3.609 | 5.390 |
| 2.823 | 3.850 | 3.684 | 3.715 | 3.626 | 4.239 |
| 9.252 | 8.198 | 9.239 | 9.014 | 9.211 | 7.347 |
| 7.505 | 6.730 | 7.496 | 7.718 | 7.561 | 6.201 |

|       |       |       |       |       |       |
|-------|-------|-------|-------|-------|-------|
| 8.882 | 7.877 | 8.863 | 9.017 | 8.798 | 7.609 |
| 6.284 | 6.551 | 6.452 | 6.182 | 6.294 | 4.125 |
| 3.687 | 3.455 | 4.068 | 3.590 | 3.721 | 3.326 |
| 4.573 | 4.111 | 4.161 | 3.789 | 4.218 | 5.064 |
| 4.236 | 3.977 | 4.318 | 4.886 | 5.252 | 6.503 |
| 2.954 | 3.219 | 3.723 | 3.051 | 3.268 | 3.815 |
| 3.171 | 4.460 | 4.355 | 3.946 | 3.919 | 4.030 |
| 4.106 | 3.819 | 3.727 | 3.883 | 3.610 | 4.891 |
| 5.596 | 5.660 | 5.479 | 5.668 | 6.164 | 7.196 |
| 5.693 | 5.638 | 6.064 | 5.838 | 5.874 | 6.303 |
| 6.906 | 6.702 | 6.479 | 6.728 | 6.728 | 7.914 |
| 5.110 | 5.338 | 5.071 | 5.516 | 5.581 | 5.197 |
| 1.940 | 2.217 | 3.027 | 1.868 | 2.228 | 1.642 |
| 4.613 | 5.450 | 5.196 | 4.214 | 4.872 | 4.757 |
| 7.468 | 7.487 | 7.586 | 7.272 | 7.570 | 6.698 |
| 6.307 | 7.052 | 6.818 | 6.678 | 6.840 | 6.128 |
| 5.023 | 5.632 | 5.545 | 4.205 | 4.677 | 5.172 |
| 9.223 | 8.972 | 9.087 | 9.228 | 9.126 | 8.602 |
| 5.923 | 6.251 | 6.142 | 5.866 | 5.873 | 4.866 |
| 5.773 | 6.338 | 5.633 | 5.807 | 5.720 | 4.753 |
| 2.924 | 3.304 | 2.963 | 2.589 | 2.378 | 3.652 |
| 1.521 | 1.854 | 1.873 | 1.281 | 1.546 | 2.354 |
| 1.647 | 2.316 | 2.274 | 2.485 | 1.940 | 2.817 |
| 6.004 | 5.197 | 5.350 | 4.987 | 5.649 | 5.164 |
| 4.775 | 4.920 | 4.882 | 4.398 | 4.480 | 3.668 |
| 2.174 | 2.217 | 2.242 | 2.278 | 2.362 | 2.483 |
| 7.590 | 8.021 | 7.626 | 8.369 | 8.228 | 9.483 |
| 9.134 | 9.013 | 9.088 | 8.992 | 9.030 | 8.094 |
| 7.180 | 7.215 | 7.292 | 6.945 | 7.018 | 5.762 |
| 5.472 | 5.743 | 5.537 | 5.330 | 5.593 | 4.780 |
| 7.898 | 7.555 | 7.698 | 7.566 | 7.857 | 6.139 |
| 4.931 | 4.340 | 4.217 | 4.243 | 4.565 | 4.800 |
| 3.593 | 3.573 | 3.272 | 3.491 | 3.047 | 4.022 |
| 4.746 | 3.921 | 5.160 | 3.404 | 5.007 | 7.075 |
| 7.093 | 7.267 | 7.277 | 7.218 | 7.022 | 6.484 |
| 5.856 | 6.295 | 6.211 | 5.648 | 6.156 | 4.757 |
| 5.503 | 5.190 | 4.972 | 4.880 | 4.976 | 3.565 |
| 6.596 | 6.626 | 6.650 | 6.515 | 6.689 | 3.394 |
| 2.299 | 1.492 | 2.426 | 2.299 | 2.279 | 2.461 |
| 3.441 | 3.434 | 3.657 | 4.448 | 4.049 | 4.667 |
| 6.121 | 6.107 | 6.333 | 6.049 | 5.745 | 5.055 |
| 8.743 | 9.136 | 8.953 | 9.007 | 8.948 | 8.035 |
| 3.906 | 3.785 | 3.769 | 4.052 | 3.776 | 2.958 |
| 7.527 | 7.460 | 7.463 | 7.745 | 7.474 | 6.375 |
| 6.012 | 6.203 | 6.232 | 5.874 | 5.926 | 5.793 |
| 5.480 | 5.489 | 5.695 | 5.642 | 5.599 | 3.471 |
| 5.285 | 4.327 | 4.543 | 4.654 | 4.964 | 3.106 |
| 7.818 | 7.711 | 7.781 | 7.841 | 7.974 | 9.129 |
| 3.982 | 3.740 | 3.372 | 3.947 | 3.870 | 3.613 |
| 5.308 | 5.818 | 5.792 | 4.985 | 5.503 | 4.797 |



|       |       |       |       |       |       |
|-------|-------|-------|-------|-------|-------|
| 7.049 | 7.252 | 7.051 | 7.287 | 7.430 | 8.716 |
| 4.738 | 4.662 | 5.370 | 4.458 | 4.471 | 3.753 |
| 4.619 | 5.133 | 4.753 | 5.128 | 5.114 | 5.703 |
| 3.519 | 3.337 | 2.451 | 3.294 | 3.579 | 3.179 |
| 5.245 | 5.429 | 5.908 | 5.281 | 5.726 | 5.132 |
| 4.322 | 3.314 | 3.069 | 3.735 | 3.775 | 3.603 |
| 3.467 | 3.288 | 3.644 | 4.064 | 4.013 | 4.250 |
| 5.465 | 5.308 | 5.160 | 5.187 | 5.211 | 5.061 |
| 6.562 | 5.330 | 6.252 | 5.672 | 5.811 | 5.569 |
| 2.095 | 1.739 | 2.419 | 2.066 | 1.773 | 2.331 |
| 4.673 | 4.223 | 4.197 | 4.034 | 4.818 | 3.794 |
| 3.546 | 3.718 | 3.886 | 3.156 | 3.598 | 3.868 |
| 9.057 | 9.514 | 9.456 | 9.363 | 9.636 | 7.203 |
| 3.849 | 2.214 | 3.213 | 3.532 | 2.591 | 2.343 |
| 3.341 | 4.136 | 4.092 | 4.040 | 3.555 | 5.071 |
| 4.904 | 4.693 | 4.654 | 4.676 | 4.469 | 5.121 |
| 6.521 | 6.330 | 6.306 | 6.598 | 6.593 | 7.037 |
| 3.729 | 4.092 | 3.558 | 3.402 | 3.821 | 5.068 |
| 5.413 | 5.917 | 5.499 | 5.395 | 5.587 | 7.320 |
| 5.686 | 5.776 | 6.118 | 5.486 | 5.693 | 6.054 |
| 3.976 | 4.520 | 4.297 | 3.891 | 3.639 | 5.149 |
| 6.430 | 7.047 | 6.772 | 5.682 | 6.541 | 2.796 |
| 6.112 | 6.497 | 6.522 | 6.660 | 6.414 | 7.294 |
| 5.371 | 3.978 | 5.209 | 4.888 | 5.655 | 5.643 |
| 5.916 | 6.154 | 6.050 | 6.035 | 5.940 | 5.942 |
| 4.684 | 5.117 | 5.103 | 5.505 | 5.638 | 6.897 |
| 4.712 | 5.305 | 5.366 | 4.869 | 5.251 | 5.979 |
| 6.984 | 6.629 | 6.773 | 6.890 | 6.526 | 6.154 |
| 2.642 | 3.014 | 2.779 | 2.899 | 3.090 | 5.111 |
| 4.956 | 5.362 | 5.386 | 5.487 | 5.695 | 5.319 |
| 5.959 | 5.839 | 5.608 | 5.526 | 5.601 | 6.281 |
| 3.624 | 4.065 | 3.861 | 3.334 | 3.220 | 4.267 |
| 7.471 | 7.294 | 7.335 | 7.590 | 7.362 | 6.430 |
| 2.701 | 3.226 | 3.282 | 3.281 | 3.154 | 3.339 |
| 7.453 | 7.100 | 7.072 | 7.152 | 7.169 | 6.822 |
| 3.598 | 2.835 | 2.859 | 3.622 | 3.007 | 3.121 |
| 3.774 | 2.946 | 4.028 | 3.672 | 3.858 | 3.254 |
| 5.107 | 4.413 | 4.808 | 5.263 | 5.110 | 6.303 |
| 3.846 | 3.789 | 3.657 | 3.806 | 3.504 | 4.218 |
| 6.125 | 5.821 | 5.468 | 5.898 | 5.738 | 7.171 |
| 2.818 | 3.307 | 2.811 | 2.347 | 2.168 | 2.674 |
| 3.475 | 3.960 | 3.956 | 3.926 | 4.555 | 5.179 |
| 5.035 | 4.160 | 4.508 | 4.491 | 4.395 | 3.314 |
| 5.310 | 5.487 | 5.369 | 6.408 | 6.625 | 8.351 |
| 4.661 | 4.614 | 4.271 | 4.143 | 4.625 | 5.204 |
| 8.664 | 8.536 | 8.391 | 8.565 | 8.375 | 7.509 |
| 6.460 | 6.402 | 6.397 | 6.276 | 6.376 | 5.598 |
| 5.696 | 5.209 | 5.427 | 5.323 | 5.872 | 6.037 |
| 4.119 | 3.682 | 2.994 | 4.290 | 3.906 | 5.090 |
| 3.201 | 3.160 | 3.101 | 3.048 | 3.130 | 3.310 |

|       |        |       |       |       |        |
|-------|--------|-------|-------|-------|--------|
| 5.066 | 5.107  | 5.233 | 4.635 | 5.348 | 6.560  |
| 3.065 | 3.138  | 2.579 | 2.540 | 2.285 | 3.702  |
| 6.458 | 6.478  | 6.300 | 6.148 | 6.180 | 3.399  |
| 2.995 | 3.532  | 3.584 | 3.566 | 3.507 | 4.250  |
| 3.959 | 3.055  | 3.221 | 3.169 | 2.776 | 3.029  |
| 6.772 | 7.581  | 7.113 | 7.731 | 8.282 | 9.143  |
| 3.689 | 2.561  | 1.759 | 3.620 | 3.955 | 2.554  |
| 6.525 | 6.092  | 6.410 | 6.353 | 5.888 | 6.622  |
| 6.865 | 6.600  | 6.717 | 6.459 | 6.590 | 6.771  |
| 4.391 | 4.117  | 4.693 | 4.303 | 4.305 | 5.327  |
| 5.014 | 4.877  | 4.961 | 4.222 | 4.545 | 5.271  |
| 3.741 | 3.621  | 3.740 | 4.404 | 4.268 | 2.800  |
| 5.678 | 5.325  | 5.603 | 4.512 | 5.311 | 4.596  |
| 6.926 | 6.466  | 6.819 | 6.496 | 6.769 | 6.726  |
| 8.184 | 6.862  | 7.700 | 7.526 | 7.628 | 8.104  |
| 3.203 | 3.774  | 2.811 | 2.936 | 3.047 | 3.462  |
| 5.882 | 5.988  | 6.203 | 6.034 | 6.056 | 5.034  |
| 8.401 | 8.311  | 8.541 | 8.322 | 8.283 | 9.313  |
| 4.920 | 5.313  | 5.560 | 5.292 | 4.965 | 5.693  |
| 6.392 | 5.913  | 6.194 | 6.260 | 6.070 | 4.937  |
| 7.227 | 7.131  | 7.020 | 6.971 | 6.890 | 5.519  |
| 3.769 | 4.103  | 4.265 | 4.129 | 4.478 | 4.721  |
| 6.036 | 5.819  | 6.101 | 6.037 | 5.996 | 5.314  |
| 5.399 | 5.438  | 5.384 | 5.575 | 5.725 | 6.688  |
| 5.893 | 6.123  | 5.545 | 5.935 | 5.606 | 6.655  |
| 3.837 | 3.937  | 3.991 | 4.352 | 4.646 | 6.139  |
| 4.926 | 5.124  | 5.110 | 5.017 | 4.822 | 5.653  |
| 9.232 | 10.141 | 9.967 | 9.698 | 9.473 | 10.653 |
| 5.765 | 5.701  | 6.070 | 5.749 | 6.218 | 7.373  |
| 5.816 | 6.350  | 6.014 | 6.111 | 6.415 | 6.026  |
| 5.342 | 5.949  | 5.792 | 5.702 | 5.830 | 5.876  |
| 4.370 | 4.213  | 4.539 | 3.646 | 4.059 | 4.289  |
| 3.248 | 2.541  | 2.142 | 4.035 | 2.924 | 3.852  |
| 4.875 | 4.640  | 4.679 | 4.283 | 4.066 | 3.027  |
| 5.223 | 4.782  | 4.934 | 4.469 | 4.936 | 4.188  |
| 2.882 | 2.933  | 2.493 | 3.272 | 2.816 | 1.782  |
| 8.540 | 8.624  | 8.733 | 8.556 | 8.361 | 7.951  |
| 7.711 | 7.706  | 7.565 | 7.709 | 7.907 | 6.755  |
| 5.522 | 5.397  | 5.562 | 5.671 | 5.393 | 4.401  |
| 3.961 | 4.006  | 4.004 | 3.249 | 3.895 | 3.354  |
| 4.670 | 4.993  | 4.978 | 4.648 | 4.707 | 3.620  |
| 4.680 | 4.945  | 4.954 | 4.644 | 4.688 | 3.735  |
| 4.400 | 4.577  | 4.905 | 4.200 | 4.485 | 3.690  |
| 4.471 | 4.375  | 4.868 | 4.283 | 4.060 | 2.941  |
| 7.179 | 7.204  | 7.165 | 7.127 | 6.933 | 6.004  |
| 5.706 | 5.551  | 5.632 | 5.814 | 5.702 | 4.814  |
| 2.975 | 3.605  | 3.422 | 3.106 | 2.843 | 2.077  |
| 5.558 | 4.047  | 4.302 | 4.442 | 4.469 | 4.447  |
| 4.466 | 4.878  | 4.535 | 4.409 | 4.476 | 5.226  |
| 3.761 | 3.319  | 3.893 | 4.163 | 4.097 | 3.263  |

|       |       |       |       |       |       |
|-------|-------|-------|-------|-------|-------|
| 2.383 | 2.209 | 2.362 | 2.635 | 2.754 | 2.804 |
| 6.910 | 7.217 | 7.058 | 7.106 | 7.191 | 6.492 |
| 2.890 | 2.718 | 3.569 | 2.730 | 2.734 | 2.573 |
| 3.189 | 3.479 | 2.965 | 3.256 | 3.369 | 3.644 |
| 6.883 | 7.323 | 7.187 | 6.977 | 7.034 | 6.610 |
| 5.041 | 5.231 | 5.180 | 5.101 | 5.413 | 5.999 |
| 4.623 | 4.296 | 4.860 | 4.671 | 4.197 | 5.246 |
| 7.323 | 7.281 | 7.631 | 7.370 | 7.322 | 6.214 |
| 5.851 | 5.346 | 6.012 | 6.119 | 6.139 | 5.529 |
| 5.150 | 5.768 | 5.239 | 5.611 | 5.903 | 4.975 |
| 2.017 | 2.603 | 1.894 | 2.488 | 2.097 | 1.566 |
| 2.204 | 2.738 | 3.749 | 3.090 | 3.017 | 2.770 |
| 2.113 | 3.356 | 2.541 | 3.129 | 2.652 | 1.707 |
| 1.344 | 1.707 | 1.626 | 1.563 | 1.297 | 1.763 |
| 5.946 | 6.279 | 5.907 | 5.867 | 5.982 | 6.589 |
| 7.436 | 7.645 | 7.155 | 7.240 | 7.402 | 6.380 |
| 3.341 | 4.206 | 3.557 | 3.930 | 3.401 | 4.180 |
| 2.487 | 2.150 | 2.332 | 2.733 | 2.559 | 3.671 |
| 4.850 | 5.488 | 5.103 | 5.235 | 5.341 | 4.525 |
| 6.112 | 6.306 | 6.080 | 5.926 | 6.335 | 5.555 |
| 2.688 | 3.326 | 2.828 | 3.049 | 3.461 | 1.921 |
| 2.816 | 3.418 | 3.010 | 3.612 | 3.089 | 2.598 |
| 2.972 | 3.142 | 3.518 | 3.456 | 3.494 | 2.623 |
| 5.871 | 5.719 | 6.034 | 6.366 | 5.921 | 6.755 |
| 2.198 | 2.163 | 2.708 | 2.027 | 2.616 | 5.155 |
| 3.571 | 4.194 | 4.129 | 3.985 | 3.519 | 3.597 |
| 2.672 | 2.305 | 1.805 | 2.527 | 2.929 | 3.546 |
| 6.200 | 6.318 | 6.425 | 6.386 | 6.380 | 5.431 |
| 4.531 | 3.597 | 4.609 | 4.886 | 4.641 | 3.094 |
| 3.385 | 2.196 | 1.900 | 2.814 | 2.654 | 1.528 |
| 3.144 | 1.492 | 4.106 | 2.947 | 3.319 | 2.088 |
| 3.074 | 2.877 | 3.277 | 3.283 | 3.404 | 2.402 |
| 2.005 | 2.148 | 2.128 | 2.245 | 2.619 | 4.159 |
| 5.204 | 5.284 | 5.307 | 5.762 | 5.813 | 7.289 |
| 4.898 | 5.199 | 5.641 | 5.104 | 4.769 | 6.847 |
| 3.673 | 4.181 | 3.938 | 3.964 | 4.074 | 3.588 |
| 4.081 | 4.374 | 4.157 | 4.015 | 4.160 | 3.401 |
| 3.407 | 3.375 | 3.427 | 3.392 | 3.481 | 2.842 |
| 4.835 | 5.386 | 5.145 | 5.006 | 4.862 | 3.970 |
| 2.666 | 1.408 | 1.729 | 2.163 | 1.328 | 1.645 |
| 6.360 | 5.853 | 6.534 | 5.891 | 6.244 | 7.617 |
| 3.361 | 3.915 | 5.084 | 3.712 | 4.824 | 4.946 |
| 8.207 | 8.023 | 8.153 | 8.214 | 7.939 | 6.759 |
| 4.688 | 5.101 | 5.070 | 4.935 | 5.024 | 3.181 |
| 5.395 | 5.548 | 5.721 | 5.862 | 5.330 | 3.250 |
| 7.728 | 7.337 | 7.588 | 7.415 | 7.264 | 6.444 |
| 3.994 | 4.121 | 4.262 | 4.275 | 4.346 | 5.227 |
| 2.502 | 2.093 | 3.085 | 2.957 | 2.288 | 1.984 |
| 3.540 | 3.118 | 3.463 | 3.507 | 3.112 | 2.523 |
| 2.476 | 2.209 | 1.749 | 3.420 | 1.839 | 1.799 |

|       |       |       |       |       |       |
|-------|-------|-------|-------|-------|-------|
| 3.321 | 3.555 | 3.172 | 3.069 | 3.398 | 3.122 |
| 7.193 | 6.633 | 7.097 | 6.883 | 6.634 | 6.004 |
| 4.708 | 4.531 | 4.562 | 4.367 | 4.114 | 3.636 |
| 4.327 | 3.640 | 2.803 | 3.461 | 3.534 | 3.780 |
| 7.646 | 7.368 | 7.435 | 7.670 | 7.501 | 6.943 |
| 5.850 | 5.749 | 5.900 | 5.950 | 5.872 | 4.968 |
| 7.279 | 7.193 | 7.471 | 7.548 | 7.389 | 6.546 |
| 7.224 | 7.290 | 7.224 | 7.246 | 7.155 | 6.545 |
| 6.459 | 6.504 | 6.575 | 6.642 | 6.652 | 6.050 |
| 8.073 | 7.594 | 7.823 | 7.891 | 7.570 | 6.990 |
| 6.593 | 6.517 | 6.429 | 6.545 | 6.512 | 5.760 |
| 6.225 | 5.112 | 5.866 | 6.021 | 5.719 | 4.470 |
| 4.104 | 4.345 | 4.258 | 4.411 | 4.239 | 3.168 |
| 7.033 | 6.899 | 7.088 | 7.205 | 6.843 | 6.511 |
| 7.178 | 7.117 | 7.040 | 7.275 | 7.007 | 6.398 |
| 9.237 | 8.731 | 9.008 | 9.016 | 8.847 | 8.385 |
| 8.775 | 8.496 | 8.590 | 8.554 | 8.446 | 7.929 |
| 8.418 | 7.714 | 8.159 | 8.275 | 8.154 | 7.426 |
| 8.342 | 7.951 | 8.227 | 8.357 | 7.854 | 7.604 |
| 6.079 | 6.516 | 6.251 | 6.635 | 6.467 | 6.067 |
| 4.727 | 5.307 | 5.058 | 4.846 | 4.867 | 2.475 |
| 5.272 | 5.522 | 5.584 | 5.292 | 5.582 | 4.236 |
| 6.589 | 6.891 | 6.775 | 6.823 | 6.878 | 6.458 |
| 3.082 | 4.198 | 3.887 | 3.623 | 3.734 | 2.776 |
| 7.551 | 7.798 | 7.578 | 7.556 | 7.513 | 6.759 |
| 5.715 | 6.001 | 6.043 | 5.506 | 5.837 | 4.889 |
| 6.836 | 7.177 | 7.135 | 7.039 | 7.182 | 6.078 |
| 7.366 | 7.065 | 7.347 | 7.405 | 7.075 | 6.216 |
| 6.143 | 5.799 | 5.826 | 5.951 | 5.834 | 5.109 |
| 3.816 | 2.517 | 3.070 | 3.114 | 3.204 | 3.646 |
| 4.066 | 4.397 | 4.563 | 4.798 | 5.408 | 6.702 |
| 4.342 | 5.239 | 5.004 | 4.359 | 4.590 | 1.888 |
| 4.434 | 4.287 | 3.497 | 3.922 | 4.370 | 3.634 |
| 7.875 | 7.876 | 7.849 | 7.531 | 7.992 | 6.847 |
| 4.125 | 4.247 | 4.403 | 3.288 | 3.703 | 4.689 |
| 4.290 | 4.143 | 4.441 | 3.592 | 3.741 | 4.687 |
| 4.167 | 4.270 | 4.410 | 3.437 | 3.669 | 4.695 |
| 5.343 | 5.204 | 5.299 | 4.672 | 5.019 | 5.655 |
| 4.398 | 4.288 | 4.366 | 3.404 | 4.009 | 4.593 |
| 5.850 | 5.688 | 5.989 | 5.877 | 5.654 | 4.977 |
| 5.932 | 5.219 | 5.426 | 5.879 | 5.618 | 5.008 |
| 3.250 | 2.906 | 3.223 | 3.276 | 3.056 | 3.209 |
| 3.258 | 3.400 | 3.504 | 3.434 | 3.396 | 3.563 |
| 2.516 | 2.340 | 2.637 | 2.318 | 2.435 | 2.815 |
| 6.988 | 6.415 | 6.257 | 6.745 | 6.902 | 6.927 |
| 7.121 | 7.201 | 7.413 | 7.154 | 7.290 | 6.592 |
| 7.851 | 7.786 | 7.777 | 7.906 | 7.943 | 6.307 |
| 7.375 | 7.355 | 7.225 | 7.427 | 7.554 | 6.928 |
| 3.299 | 3.089 | 3.297 | 4.454 | 4.154 | 6.552 |
| 4.883 | 5.164 | 4.868 | 5.141 | 5.214 | 5.706 |

|       |       |       |       |       |       |
|-------|-------|-------|-------|-------|-------|
| 2.634 | 2.926 | 3.309 | 2.888 | 3.317 | 3.557 |
| 6.734 | 7.043 | 7.103 | 6.896 | 6.719 | 6.174 |
| 7.064 | 7.265 | 7.349 | 7.448 | 7.210 | 6.515 |
| 9.781 | 9.939 | 9.791 | 9.800 | 9.662 | 7.486 |
| 7.525 | 7.603 | 7.469 | 7.494 | 7.487 | 6.239 |
| 3.065 | 2.808 | 2.583 | 2.789 | 3.084 | 3.457 |
| 9.126 | 9.079 | 9.398 | 9.233 | 8.950 | 7.270 |
| 2.085 | 2.237 | 1.922 | 2.302 | 2.219 | 3.683 |
| 6.193 | 6.437 | 6.333 | 5.861 | 6.154 | 4.646 |
| 2.618 | 2.429 | 2.834 | 2.426 | 2.432 | 2.566 |
| 5.791 | 6.533 | 6.089 | 6.272 | 6.164 | 5.269 |
| 5.929 | 5.842 | 5.852 | 6.149 | 5.988 | 6.393 |
| 3.994 | 4.086 | 4.338 | 4.629 | 4.134 | 5.301 |
| 1.806 | 2.892 | 1.959 | 2.871 | 2.220 | 3.947 |
| 5.487 | 4.719 | 4.347 | 4.539 | 4.968 | 3.274 |
| 3.668 | 3.416 | 3.187 | 3.758 | 3.584 | 2.183 |
| 4.464 | 4.861 | 4.489 | 5.220 | 4.502 | 4.406 |
| 3.489 | 3.157 | 3.074 | 2.695 | 3.264 | 2.482 |
| 6.088 | 5.608 | 5.890 | 5.607 | 5.748 | 5.224 |
| 4.503 | 4.348 | 4.826 | 3.893 | 3.419 | 3.813 |
| 6.506 | 6.221 | 6.447 | 6.466 | 6.287 | 5.745 |
| 5.523 | 6.113 | 5.731 | 5.770 | 5.778 | 5.109 |
| 4.315 | 4.215 | 4.204 | 4.206 | 3.791 | 5.554 |
| 3.273 | 2.507 | 2.737 | 2.899 | 2.613 | 2.159 |
| 5.487 | 5.238 | 5.539 | 5.027 | 5.060 | 3.866 |
| 6.222 | 4.531 | 4.776 | 5.228 | 4.936 | 4.626 |
| 6.617 | 6.817 | 6.727 | 6.876 | 6.763 | 5.685 |
| 9.705 | 9.686 | 9.709 | 9.840 | 9.802 | 8.799 |
| 6.435 | 6.634 | 6.356 | 6.552 | 7.052 | 7.675 |
| 2.035 | 1.566 | 1.474 | 1.399 | 1.495 | 1.521 |
| 2.121 | 0.979 | 1.239 | 1.224 | 1.264 | 1.049 |
| 6.886 | 6.799 | 6.722 | 6.401 | 6.817 | 4.903 |
| 7.558 | 7.874 | 7.694 | 7.540 | 7.679 | 6.527 |
| 2.099 | 2.170 | 2.162 | 2.829 | 2.994 | 2.829 |
| 1.692 | 3.507 | 3.205 | 3.476 | 3.617 | 5.880 |
| 6.721 | 6.903 | 6.969 | 7.008 | 6.741 | 5.640 |
| 7.998 | 8.003 | 8.180 | 8.162 | 8.318 | 7.539 |
| 3.237 | 3.329 | 3.752 | 3.482 | 3.650 | 1.900 |
| 6.521 | 6.827 | 6.745 | 6.646 | 6.846 | 5.146 |
| 4.171 | 3.580 | 3.496 | 2.879 | 3.354 | 2.956 |
| 7.437 | 7.876 | 7.795 | 7.776 | 7.593 | 5.609 |
| 7.003 | 6.796 | 6.034 | 6.806 | 6.644 | 4.691 |
| 2.940 | 2.650 | 3.488 | 2.690 | 3.587 | 3.387 |
| 5.553 | 5.718 | 5.683 | 5.861 | 5.482 | 3.820 |
| 7.219 | 6.974 | 7.283 | 6.836 | 7.125 | 2.187 |
| 6.531 | 7.010 | 6.601 | 6.612 | 6.687 | 5.552 |
| 4.166 | 4.689 | 4.601 | 5.038 | 5.072 | 5.406 |
| 2.566 | 3.053 | 2.676 | 3.022 | 3.410 | 3.813 |
| 7.599 | 7.858 | 7.518 | 7.629 | 7.810 | 8.486 |
| 4.140 | 4.223 | 4.189 | 4.386 | 3.971 | 4.797 |

|       |       |       |       |       |       |
|-------|-------|-------|-------|-------|-------|
| 4.561 | 4.247 | 4.048 | 4.283 | 4.128 | 5.153 |
| 4.597 | 4.299 | 4.847 | 4.073 | 4.386 | 3.080 |
| 3.028 | 3.462 | 3.128 | 3.623 | 3.018 | 5.203 |
| 3.382 | 2.711 | 1.457 | 3.140 | 2.754 | 5.095 |
| 3.564 | 2.147 | 3.210 | 3.671 | 3.893 | 2.469 |
| 1.641 | 1.789 | 1.471 | 1.715 | 2.334 | 1.327 |
| 3.493 | 3.308 | 3.460 | 4.158 | 4.290 | 4.162 |
| 5.779 | 6.415 | 6.281 | 6.100 | 6.528 | 4.605 |
| 4.094 | 4.186 | 3.758 | 3.781 | 4.151 | 3.989 |
| 4.351 | 3.816 | 4.363 | 5.088 | 4.858 | 4.464 |
| 3.382 | 3.367 | 2.680 | 2.350 | 2.024 | 1.429 |
| 3.604 | 4.081 | 5.336 | 4.540 | 3.310 | 1.963 |
| 2.178 | 2.754 | 2.635 | 2.640 | 2.945 | 2.635 |
| 5.252 | 5.521 | 5.011 | 4.940 | 5.012 | 4.535 |
| 7.154 | 7.343 | 7.189 | 7.157 | 7.073 | 6.473 |
| 1.536 | 1.814 | 1.315 | 1.321 | 1.178 | 1.913 |
| 4.353 | 3.380 | 3.687 | 4.590 | 3.237 | 2.500 |
| 7.674 | 8.125 | 7.870 | 7.805 | 7.882 | 5.798 |
| 3.018 | 3.280 | 2.686 | 2.724 | 3.186 | 3.868 |
| 3.335 | 3.092 | 2.730 | 3.730 | 3.586 | 3.034 |
| 4.555 | 4.846 | 4.330 | 5.209 | 5.716 | 6.006 |
| 5.391 | 4.960 | 5.053 | 4.851 | 5.272 | 4.102 |
| 4.133 | 3.497 | 3.925 | 4.399 | 3.966 | 4.899 |
| 2.293 | 2.314 | 1.987 | 2.905 | 2.857 | 4.282 |
| 5.851 | 5.762 | 5.629 | 6.271 | 5.881 | 7.122 |
| 5.081 | 4.469 | 4.962 | 4.248 | 4.119 | 2.872 |
| 2.355 | 3.101 | 2.808 | 2.562 | 2.932 | 3.386 |
| 4.708 | 4.130 | 4.124 | 4.233 | 4.673 | 3.542 |
| 4.568 | 3.635 | 4.084 | 4.579 | 4.245 | 3.505 |
| 4.724 | 3.783 | 4.046 | 4.673 | 4.389 | 3.628 |
| 5.225 | 5.542 | 5.566 | 5.409 | 5.535 | 3.664 |
| 5.254 | 5.406 | 5.470 | 5.579 | 5.417 | 3.886 |
| 3.375 | 2.354 | 4.175 | 3.744 | 3.368 | 4.247 |
| 4.559 | 4.558 | 4.634 | 4.143 | 4.955 | 4.641 |
| 3.763 | 3.862 | 3.628 | 4.026 | 3.490 | 2.201 |
| 3.380 | 3.660 | 3.156 | 3.126 | 2.931 | 3.277 |
| 1.323 | 1.739 | 1.504 | 1.684 | 1.649 | 2.562 |
| 3.534 | 3.012 | 2.609 | 3.620 | 2.912 | 2.829 |
| 6.190 | 5.999 | 6.049 | 6.254 | 6.245 | 6.989 |
| 2.768 | 3.556 | 3.074 | 3.592 | 3.829 | 5.746 |
| 2.386 | 2.755 | 2.898 | 2.355 | 3.142 | 2.717 |
| 6.612 | 6.427 | 6.500 | 6.230 | 6.367 | 4.359 |
| 7.141 | 6.535 | 6.225 | 7.299 | 7.298 | 7.677 |
| 2.048 | 2.349 | 1.913 | 2.301 | 2.671 | 2.774 |
| 4.320 | 4.594 | 4.644 | 4.867 | 4.802 | 5.902 |
| 4.230 | 4.473 | 4.639 | 4.426 | 4.707 | 4.902 |
| 4.672 | 5.561 | 5.699 | 4.855 | 5.463 | 4.857 |
| 4.724 | 5.590 | 5.701 | 4.685 | 5.458 | 4.859 |
| 2.649 | 3.409 | 3.364 | 2.994 | 3.644 | 3.437 |
| 2.117 | 2.231 | 2.418 | 2.029 | 1.932 | 2.629 |

|       |       |       |       |       |       |
|-------|-------|-------|-------|-------|-------|
| 2.503 | 2.561 | 2.892 | 2.300 | 2.306 | 3.053 |
| 2.970 | 2.896 | 3.313 | 2.858 | 2.757 | 3.461 |
| 3.126 | 3.214 | 3.593 | 3.029 | 3.007 | 3.636 |
| 2.741 | 3.213 | 3.406 | 2.889 | 2.771 | 3.304 |
| 7.621 | 8.231 | 7.992 | 7.944 | 8.011 | 7.170 |
| 3.598 | 3.749 | 3.503 | 3.286 | 3.461 | 3.313 |
| 5.340 | 5.804 | 5.612 | 5.811 | 5.666 | 5.088 |
| 4.697 | 4.585 | 5.013 | 5.822 | 4.513 | 5.809 |
| 6.009 | 6.277 | 6.027 | 6.233 | 6.200 | 5.193 |
| 4.511 | 4.067 | 4.785 | 4.261 | 4.469 | 5.038 |
| 3.762 | 3.552 | 2.966 | 2.884 | 3.825 | 3.201 |
| 2.748 | 3.291 | 3.386 | 2.538 | 2.637 | 4.187 |
| 7.026 | 6.640 | 6.377 | 6.781 | 6.730 | 7.053 |
| 4.931 | 4.547 | 4.556 | 4.972 | 4.775 | 5.264 |
| 3.692 | 3.389 | 3.261 | 3.763 | 2.606 | 3.403 |
| 5.884 | 5.847 | 5.725 | 5.356 | 5.961 | 4.755 |
| 3.919 | 3.332 | 3.467 | 2.916 | 3.431 | 3.129 |
| 4.396 | 4.690 | 4.731 | 4.729 | 5.191 | 3.711 |
| 2.784 | 2.270 | 2.772 | 3.176 | 2.391 | 2.082 |
| 7.273 | 7.729 | 7.417 | 7.289 | 7.308 | 6.313 |
| 2.492 | 1.900 | 1.434 | 2.671 | 2.313 | 1.873 |
| 8.232 | 7.376 | 7.329 | 7.870 | 8.178 | 8.523 |
| 1.667 | 1.772 | 2.062 | 1.883 | 1.463 | 2.847 |
| 2.982 | 2.708 | 2.996 | 2.976 | 1.836 | 2.994 |
| 3.852 | 4.337 | 3.871 | 4.464 | 4.391 | 3.727 |
| 5.815 | 6.088 | 6.100 | 5.904 | 5.736 | 5.130 |
| 3.734 | 3.317 | 3.018 | 3.415 | 3.317 | 2.723 |
| 7.111 | 7.106 | 7.210 | 6.902 | 6.913 | 6.002 |
| 2.737 | 2.740 | 2.916 | 2.538 | 2.826 | 4.287 |
| 4.862 | 4.707 | 4.233 | 4.431 | 4.270 | 2.851 |
| 3.082 | 3.799 | 3.379 | 3.596 | 3.246 | 3.771 |
| 4.079 | 3.803 | 4.102 | 4.655 | 3.312 | 1.535 |
| 7.561 | 7.553 | 7.381 | 7.624 | 7.308 | 4.634 |
| 5.006 | 5.369 | 5.272 | 4.914 | 4.831 | 5.650 |
| 5.963 | 5.872 | 6.079 | 5.829 | 6.296 | 4.582 |
| 5.792 | 6.054 | 5.357 | 4.933 | 5.465 | 4.301 |
| 8.972 | 8.384 | 8.664 | 8.553 | 8.822 | 8.020 |
| 5.768 | 6.402 | 6.338 | 5.957 | 5.816 | 5.276 |
| 3.318 | 2.868 | 3.175 | 2.890 | 2.466 | 3.245 |
| 4.847 | 4.892 | 4.905 | 4.974 | 4.719 | 4.396 |
| 4.019 | 3.345 | 3.395 | 2.062 | 3.993 | 3.761 |
| 4.706 | 4.831 | 5.197 | 5.064 | 4.974 | 3.233 |
| 7.208 | 6.770 | 6.857 | 6.949 | 6.682 | 5.420 |
| 7.188 | 7.409 | 7.115 | 7.066 | 6.932 | 4.453 |
| 3.820 | 4.700 | 4.014 | 3.704 | 3.926 | 4.954 |
| 4.819 | 5.044 | 4.492 | 4.070 | 4.271 | 5.712 |
| 2.925 | 2.707 | 2.691 | 2.787 | 2.543 | 3.291 |
| 7.733 | 7.824 | 7.586 | 7.988 | 7.890 | 8.266 |
| 3.944 | 3.831 | 4.151 | 4.720 | 4.485 | 4.909 |
| 3.343 | 2.995 | 3.456 | 2.958 | 3.512 | 1.792 |

|       |       |       |       |       |       |
|-------|-------|-------|-------|-------|-------|
| 2.070 | 2.978 | 2.141 | 2.698 | 2.813 | 3.036 |
| 6.781 | 6.428 | 6.771 | 6.559 | 6.631 | 6.109 |
| 7.632 | 7.535 | 7.410 | 7.501 | 7.360 | 6.878 |
| 7.562 | 7.794 | 7.778 | 7.559 | 8.017 | 7.158 |
| 6.942 | 6.880 | 6.748 | 6.623 | 6.798 | 5.179 |
| 7.450 | 7.372 | 7.479 | 7.305 | 7.439 | 5.587 |
| 5.943 | 5.787 | 5.784 | 5.822 | 5.452 | 4.171 |
| 4.490 | 4.644 | 5.256 | 5.463 | 4.935 | 2.862 |
| 7.926 | 7.898 | 7.653 | 7.695 | 7.814 | 5.163 |
| 4.942 | 4.175 | 4.165 | 4.612 | 4.615 | 5.654 |
| 7.168 | 6.851 | 6.781 | 6.782 | 6.659 | 7.393 |
| 3.213 | 2.802 | 2.776 | 3.119 | 3.005 | 4.276 |
| 6.292 | 6.760 | 6.760 | 6.516 | 6.348 | 5.951 |
| 5.479 | 5.841 | 5.546 | 5.698 | 5.533 | 5.045 |
| 4.288 | 4.149 | 4.071 | 4.547 | 4.114 | 4.650 |
| 4.462 | 4.912 | 4.848 | 5.034 | 4.897 | 4.239 |
| 5.848 | 5.762 | 5.974 | 5.734 | 5.590 | 5.752 |
| 3.490 | 4.270 | 3.755 | 3.870 | 4.339 | 3.538 |
| 6.249 | 6.041 | 5.761 | 5.779 | 6.050 | 5.495 |
| 4.092 | 3.799 | 3.686 | 3.887 | 3.903 | 3.587 |
| 7.228 | 5.624 | 6.430 | 7.130 | 6.172 | 5.377 |
| 3.287 | 2.754 | 2.727 | 2.759 | 2.726 | 1.938 |
| 9.666 | 9.314 | 9.310 | 9.729 | 9.161 | 8.980 |
| 8.902 | 8.489 | 8.505 | 9.072 | 8.630 | 8.226 |
| 4.448 | 4.662 | 4.346 | 4.703 | 4.544 | 4.733 |
| 5.759 | 5.945 | 5.805 | 4.950 | 5.689 | 5.935 |
| 3.120 | 3.384 | 3.285 | 3.447 | 3.004 | 3.237 |
| 7.292 | 7.167 | 7.379 | 7.672 | 7.883 | 9.151 |
| 3.808 | 3.527 | 3.394 | 3.396 | 3.672 | 4.285 |
| 2.265 | 2.774 | 3.475 | 2.273 | 1.604 | 3.073 |
| 3.050 | 2.610 | 3.976 | 2.489 | 3.030 | 3.597 |
| 3.932 | 3.507 | 3.853 | 3.934 | 3.879 | 5.186 |
| 4.324 | 4.912 | 4.720 | 3.953 | 3.871 | 4.111 |
| 4.937 | 3.971 | 4.422 | 4.592 | 4.934 | 5.849 |
| 2.896 | 2.823 | 2.903 | 3.479 | 3.089 | 4.467 |
| 2.716 | 2.029 | 3.020 | 2.032 | 2.202 | 2.402 |
| 7.927 | 8.074 | 7.656 | 8.302 | 8.007 | 8.551 |
| 8.067 | 7.955 | 7.996 | 8.501 | 8.258 | 9.861 |
| 4.336 | 4.568 | 4.855 | 3.980 | 4.338 | 3.847 |
| 4.741 | 5.682 | 4.982 | 5.026 | 5.768 | 5.386 |
| 4.258 | 4.625 | 3.974 | 3.740 | 3.850 | 3.640 |
| 5.662 | 5.790 | 5.592 | 5.729 | 5.894 | 5.857 |
| 5.123 | 5.029 | 5.218 | 4.982 | 5.249 | 5.620 |
| 4.344 | 5.009 | 4.926 | 4.204 | 4.735 | 5.589 |
| 9.345 | 8.708 | 9.010 | 9.045 | 8.779 | 6.852 |
| 2.826 | 3.345 | 3.810 | 2.326 | 3.738 | 4.842 |
| 3.094 | 2.307 | 2.848 | 2.597 | 2.388 | 2.080 |
| 7.986 | 7.951 | 7.871 | 7.920 | 8.031 | 7.227 |
| 8.056 | 8.134 | 8.047 | 8.111 | 8.283 | 7.659 |
| 4.291 | 4.759 | 4.890 | 4.487 | 4.319 | 3.272 |



|       |       |       |       |       |       |
|-------|-------|-------|-------|-------|-------|
| 3.339 | 3.593 | 3.796 | 3.341 | 3.101 | 3.759 |
| 6.057 | 5.827 | 5.687 | 5.769 | 5.715 | 4.105 |
| 4.172 | 3.912 | 4.149 | 4.016 | 3.965 | 3.982 |
| 5.154 | 5.366 | 5.313 | 5.248 | 5.281 | 4.405 |
| 6.418 | 6.343 | 6.117 | 5.839 | 6.141 | 4.009 |
| 4.385 | 3.899 | 4.168 | 4.179 | 4.166 | 4.374 |
| 7.467 | 7.605 | 7.935 | 7.296 | 7.471 | 4.988 |
| 5.333 | 5.794 | 5.723 | 5.295 | 5.611 | 5.626 |
| 2.986 | 3.052 | 3.012 | 3.238 | 3.052 | 4.441 |
| 3.339 | 3.607 | 3.914 | 2.966 | 3.511 | 4.036 |
| 3.017 | 3.487 | 2.766 | 3.128 | 2.799 | 2.353 |
| 4.446 | 4.996 | 5.484 | 4.369 | 4.975 | 3.631 |
| 6.376 | 6.697 | 6.560 | 6.300 | 6.691 | 5.853 |
| 7.042 | 6.714 | 7.251 | 7.099 | 6.521 | 5.557 |
| 4.688 | 5.946 | 5.719 | 5.811 | 5.832 | 5.072 |
| 6.079 | 6.326 | 6.290 | 5.867 | 6.040 | 4.614 |
| 5.429 | 5.339 | 5.462 | 5.435 | 5.465 | 5.329 |
| 7.896 | 8.047 | 7.999 | 8.049 | 7.816 | 7.451 |
| 3.587 | 3.847 | 3.532 | 3.635 | 3.907 | 3.986 |
| 3.830 | 3.270 | 2.971 | 3.322 | 3.221 | 3.290 |
| 5.346 | 5.520 | 5.545 | 5.415 | 5.398 | 4.238 |
| 0.985 | 1.495 | 1.235 | 1.394 | 0.924 | 1.431 |
| 6.790 | 7.191 | 7.002 | 7.165 | 7.237 | 6.600 |
| 9.380 | 9.627 | 9.571 | 9.259 | 9.498 | 8.805 |
| 9.377 | 9.623 | 9.423 | 9.355 | 9.390 | 7.908 |
| 5.013 | 5.567 | 5.078 | 4.873 | 6.032 | 5.678 |
| 5.661 | 5.228 | 5.188 | 5.461 | 5.210 | 4.696 |
| 4.878 | 4.854 | 4.747 | 3.847 | 4.432 | 4.766 |
| 4.553 | 4.339 | 5.053 | 4.554 | 4.878 | 3.572 |
| 7.826 | 7.312 | 8.084 | 8.062 | 7.919 | 7.577 |
| 4.199 | 3.454 | 3.616 | 3.720 | 4.395 | 4.412 |
| 5.226 | 5.591 | 5.908 | 5.500 | 5.571 | 4.614 |
| 5.833 | 6.003 | 5.935 | 5.941 | 6.558 | 5.514 |
| 4.827 | 5.039 | 4.683 | 5.213 | 4.854 | 4.396 |
| 4.719 | 4.833 | 4.829 | 4.796 | 4.785 | 3.946 |
| 2.994 | 2.156 | 2.623 | 2.765 | 3.266 | 2.746 |
| 3.410 | 3.409 | 3.209 | 3.605 | 3.444 | 4.614 |
| 3.712 | 4.073 | 4.368 | 3.748 | 4.036 | 3.254 |
| 6.954 | 7.452 | 7.026 | 7.194 | 7.439 | 6.044 |
| 7.047 | 7.116 | 7.156 | 6.575 | 7.258 | 7.482 |
| 6.324 | 5.981 | 6.187 | 6.112 | 6.047 | 4.261 |
| 4.965 | 5.160 | 5.184 | 4.419 | 4.434 | 5.095 |
| 4.942 | 4.180 | 4.815 | 4.647 | 3.903 | 5.847 |
| 4.179 | 3.755 | 3.399 | 4.154 | 3.993 | 4.714 |
| 4.233 | 4.652 | 4.259 | 3.890 | 4.675 | 5.234 |
| 8.759 | 8.242 | 8.204 | 8.626 | 8.703 | 7.823 |
| 6.675 | 7.136 | 6.954 | 7.008 | 7.014 | 6.177 |
| 3.963 | 4.089 | 3.817 | 4.074 | 3.923 | 4.017 |
| 6.791 | 7.159 | 6.848 | 6.884 | 7.029 | 5.055 |
| 6.477 | 6.456 | 6.750 | 6.668 | 6.790 | 4.593 |

|       |       |       |       |       |       |
|-------|-------|-------|-------|-------|-------|
| 8.132 | 8.177 | 8.185 | 8.304 | 7.911 | 7.214 |
| 4.654 | 4.751 | 4.661 | 4.727 | 4.764 | 4.575 |
| 7.935 | 7.844 | 7.823 | 7.931 | 7.679 | 6.627 |
| 8.845 | 8.749 | 8.983 | 8.929 | 8.884 | 5.789 |
| 3.101 | 3.654 | 3.131 | 3.103 | 3.493 | 2.337 |
| 5.365 | 4.870 | 4.876 | 5.089 | 4.861 | 3.160 |
| 7.054 | 7.092 | 6.875 | 6.557 | 6.980 | 5.896 |
| 4.588 | 4.435 | 4.496 | 4.170 | 4.028 | 3.388 |
| 5.459 | 5.073 | 5.769 | 5.659 | 5.445 | 3.400 |
| 2.931 | 2.383 | 2.474 | 2.585 | 3.340 | 2.707 |
| 4.269 | 3.917 | 4.467 | 4.293 | 4.555 | 4.914 |
| 4.082 | 4.252 | 5.162 | 3.594 | 4.038 | 4.822 |
| 7.549 | 7.475 | 7.567 | 7.653 | 7.557 | 6.936 |
| 5.519 | 5.238 | 5.208 | 5.683 | 5.271 | 4.903 |
| 3.022 | 3.489 | 3.102 | 3.677 | 2.970 | 3.162 |
| 4.495 | 4.620 | 4.332 | 4.651 | 4.558 | 4.639 |
| 4.833 | 4.979 | 4.749 | 4.983 | 4.977 | 4.821 |
| 7.085 | 6.909 | 6.708 | 7.377 | 6.960 | 7.468 |
| 4.940 | 4.924 | 4.578 | 5.399 | 4.951 | 5.434 |
| 6.102 | 5.950 | 5.943 | 6.363 | 6.206 | 5.933 |
| 6.145 | 5.773 | 5.892 | 6.343 | 6.017 | 5.517 |
| 7.318 | 7.180 | 6.912 | 7.632 | 7.300 | 7.809 |
| 5.601 | 5.820 | 5.241 | 5.749 | 5.954 | 5.719 |
| 5.361 | 5.460 | 5.080 | 5.646 | 5.145 | 5.782 |
| 6.516 | 6.120 | 6.104 | 6.878 | 6.279 | 6.111 |
| 4.464 | 4.668 | 3.773 | 3.663 | 2.869 | 3.627 |
| 4.246 | 3.906 | 3.270 | 4.043 | 3.978 | 4.340 |
| 5.992 | 6.000 | 5.769 | 6.385 | 6.024 | 6.074 |
| 4.874 | 3.991 | 4.586 | 4.173 | 5.018 | 3.791 |
| 7.760 | 7.741 | 7.593 | 7.685 | 7.693 | 6.494 |
| 3.702 | 2.900 | 3.620 | 3.086 | 3.119 | 4.493 |
| 8.214 | 7.710 | 7.660 | 7.196 | 7.345 | 6.444 |
| 7.123 | 6.462 | 6.403 | 5.989 | 6.463 | 4.117 |
| 5.645 | 5.960 | 5.589 | 5.285 | 5.245 | 4.956 |
| 3.254 | 3.647 | 3.930 | 3.865 | 3.642 | 4.950 |
| 8.891 | 8.169 | 8.375 | 8.089 | 8.453 | 7.009 |
| 3.396 | 2.326 | 2.809 | 2.182 | 3.172 | 2.202 |
| 6.532 | 6.773 | 6.759 | 6.503 | 7.049 | 3.974 |
| 2.704 | 3.384 | 3.218 | 3.010 | 3.227 | 2.118 |
| 3.536 | 4.087 | 4.198 | 4.556 | 4.687 | 6.572 |
| 2.809 | 2.883 | 3.188 | 2.645 | 2.726 | 2.917 |
| 4.117 | 3.472 | 3.672 | 4.041 | 3.776 | 2.821 |
| 3.614 | 3.512 | 4.117 | 3.278 | 3.943 | 2.232 |
| 6.295 | 6.356 | 6.254 | 6.126 | 6.673 | 5.452 |
| 5.133 | 5.470 | 5.563 | 5.731 | 5.287 | 3.187 |
| 3.055 | 3.639 | 3.401 | 2.798 | 3.554 | 4.796 |
| 2.557 | 2.872 | 2.511 | 2.601 | 3.101 | 3.101 |
| 7.552 | 7.603 | 7.563 | 7.811 | 8.230 | 9.943 |
| 4.260 | 3.892 | 4.122 | 3.763 | 4.092 | 4.567 |
| 5.943 | 6.163 | 5.515 | 6.140 | 6.146 | 6.923 |

|       |       |       |       |       |       |
|-------|-------|-------|-------|-------|-------|
| 5.229 | 5.480 | 5.096 | 5.501 | 5.496 | 6.429 |
| 1.490 | 1.238 | 1.861 | 1.508 | 2.103 | 3.758 |
| 7.402 | 7.711 | 7.647 | 7.736 | 7.725 | 6.573 |
| 6.983 | 7.185 | 7.275 | 7.117 | 7.042 | 6.253 |
| 5.433 | 6.465 | 6.059 | 5.971 | 5.887 | 5.922 |
| 5.024 | 5.429 | 5.259 | 5.149 | 5.314 | 5.730 |
| 7.516 | 7.227 | 7.520 | 7.351 | 7.141 | 5.312 |
| 6.518 | 6.448 | 6.615 | 6.501 | 6.523 | 5.009 |
| 6.882 | 6.848 | 7.061 | 6.806 | 6.864 | 2.846 |
| 4.182 | 4.883 | 4.415 | 4.767 | 4.520 | 4.917 |
| 2.696 | 2.655 | 3.067 | 3.091 | 3.314 | 1.922 |
| 4.249 | 5.091 | 4.417 | 4.389 | 5.165 | 5.908 |
| 3.360 | 3.894 | 4.066 | 3.265 | 4.189 | 3.258 |
| 2.612 | 2.570 | 2.659 | 2.126 | 2.362 | 2.230 |
| 5.225 | 4.774 | 5.054 | 5.464 | 5.102 | 4.785 |
| 2.238 | 3.649 | 1.946 | 2.678 | 2.210 | 2.843 |
| 5.176 | 5.099 | 4.722 | 4.656 | 5.070 | 5.204 |
| 2.396 | 2.803 | 2.581 | 2.494 | 3.125 | 3.286 |
| 7.635 | 6.694 | 7.506 | 7.098 | 7.042 | 5.072 |
| 1.956 | 2.997 | 2.306 | 3.226 | 3.631 | 4.475 |
| 3.790 | 3.638 | 3.076 | 3.753 | 3.157 | 3.902 |
| 8.704 | 8.937 | 8.769 | 8.974 | 9.256 | 7.973 |
| 3.641 | 4.074 | 4.203 | 4.193 | 4.474 | 5.333 |
| 5.075 | 5.345 | 5.313 | 5.255 | 5.494 | 4.977 |
| 2.749 | 3.158 | 2.780 | 3.290 | 3.339 | 2.958 |
| 3.822 | 3.980 | 4.023 | 3.581 | 3.774 | 2.988 |
| 2.731 | 2.689 | 2.820 | 2.495 | 2.518 | 3.425 |
| 2.397 | 3.523 | 3.212 | 2.516 | 3.052 | 1.446 |
| 3.986 | 4.217 | 4.181 | 4.281 | 3.663 | 4.284 |
| 5.253 | 5.118 | 5.248 | 5.691 | 5.841 | 6.591 |
| 4.037 | 3.669 | 3.298 | 3.152 | 3.585 | 4.105 |
| 5.374 | 6.265 | 5.793 | 5.853 | 5.840 | 6.142 |
| 3.715 | 3.714 | 3.751 | 3.909 | 3.971 | 2.760 |
| 6.340 | 6.705 | 6.643 | 6.318 | 6.585 | 5.780 |
| 6.262 | 6.820 | 6.237 | 6.353 | 6.828 | 7.736 |
| 3.094 | 3.236 | 3.248 | 3.129 | 2.985 | 3.763 |
| 8.405 | 8.549 | 8.309 | 8.419 | 8.629 | 7.772 |
| 5.593 | 5.803 | 5.687 | 5.602 | 5.676 | 5.578 |
| 5.558 | 5.498 | 5.289 | 5.076 | 5.342 | 5.726 |
| 6.673 | 6.501 | 6.735 | 6.183 | 6.220 | 7.485 |
| 5.312 | 6.015 | 5.590 | 5.949 | 6.285 | 4.646 |
| 6.183 | 6.787 | 6.324 | 5.858 | 6.439 | 4.665 |
| 2.888 | 2.606 | 2.732 | 2.973 | 2.856 | 4.460 |
| 4.430 | 5.024 | 5.002 | 4.606 | 4.301 | 3.951 |
| 8.479 | 8.211 | 8.309 | 8.315 | 8.246 | 7.164 |
| 4.405 | 4.077 | 4.388 | 4.128 | 4.312 | 3.470 |
| 4.035 | 4.387 | 4.038 | 4.134 | 4.404 | 3.426 |
| 6.521 | 6.625 | 6.620 | 6.385 | 6.680 | 7.127 |
| 5.585 | 5.323 | 5.289 | 5.429 | 5.471 | 4.243 |
| 3.750 | 5.155 | 4.651 | 4.782 | 4.814 | 4.132 |

|       |       |       |       |       |       |
|-------|-------|-------|-------|-------|-------|
| 4.076 | 4.498 | 4.491 | 4.997 | 4.588 | 6.008 |
| 4.066 | 4.617 | 4.383 | 4.450 | 3.928 | 3.619 |
| 4.471 | 4.658 | 4.679 | 4.565 | 4.738 | 4.307 |
| 6.354 | 7.065 | 6.511 | 6.687 | 6.771 | 4.552 |
| 5.550 | 5.895 | 5.312 | 5.469 | 5.752 | 5.559 |
| 4.215 | 3.982 | 4.217 | 3.672 | 4.068 | 2.829 |
| 8.064 | 6.819 | 7.125 | 7.950 | 7.584 | 8.764 |
| 3.264 | 3.072 | 3.410 | 3.171 | 3.607 | 3.230 |
| 4.517 | 4.096 | 3.918 | 4.092 | 4.141 | 4.900 |
| 5.826 | 5.497 | 5.245 | 5.828 | 5.957 | 6.665 |
| 4.996 | 4.801 | 5.007 | 5.046 | 4.904 | 3.843 |
| 7.974 | 6.893 | 6.908 | 7.574 | 7.339 | 8.088 |
| 3.763 | 3.377 | 2.744 | 3.712 | 3.125 | 3.706 |
| 3.632 | 4.301 | 3.777 | 3.672 | 3.926 | 4.458 |
| 4.000 | 3.978 | 3.431 | 3.850 | 3.775 | 3.366 |
| 8.799 | 8.998 | 9.016 | 9.122 | 8.944 | 8.464 |
| 7.828 | 7.903 | 8.013 | 8.135 | 7.814 | 7.521 |
| 7.481 | 7.567 | 7.670 | 7.802 | 7.489 | 7.195 |
| 4.636 | 4.271 | 4.361 | 4.424 | 3.766 | 1.853 |
| 5.268 | 5.440 | 5.247 | 4.217 | 4.643 | 6.176 |
| 3.084 | 3.281 | 3.552 | 2.899 | 2.948 | 4.890 |
| 5.205 | 4.893 | 5.021 | 5.280 | 5.004 | 5.866 |
| 4.099 | 4.085 | 3.836 | 3.739 | 4.050 | 2.904 |
| 5.678 | 4.473 | 4.059 | 3.655 | 4.862 | 4.315 |
| 4.310 | 4.979 | 5.083 | 4.972 | 4.994 | 4.381 |
| 4.289 | 4.583 | 4.886 | 4.522 | 4.817 | 4.563 |
| 6.495 | 6.223 | 6.445 | 6.075 | 5.847 | 6.026 |
| 3.660 | 3.326 | 4.162 | 3.164 | 3.858 | 2.900 |
| 1.732 | 1.569 | 1.822 | 1.674 | 1.394 | 1.977 |
| 7.581 | 7.989 | 8.137 | 8.103 | 8.146 | 3.862 |
| 5.585 | 5.635 | 5.742 | 5.505 | 5.237 | 5.044 |
| 7.228 | 7.534 | 7.391 | 7.528 | 7.414 | 4.806 |
| 8.372 | 8.379 | 8.372 | 8.408 | 8.658 | 6.337 |
| 3.917 | 4.415 | 4.438 | 4.218 | 4.241 | 5.219 |
| 3.995 | 4.131 | 3.886 | 4.214 | 4.434 | 5.472 |
| 7.094 | 6.686 | 7.092 | 7.063 | 7.095 | 6.441 |
| 2.977 | 2.982 | 2.647 | 3.172 | 3.110 | 3.664 |
| 4.641 | 4.618 | 4.677 | 4.068 | 4.810 | 5.790 |
| 4.003 | 4.123 | 4.414 | 3.846 | 4.269 | 3.187 |
| 3.142 | 3.468 | 3.418 | 3.811 | 4.069 | 5.200 |
| 4.400 | 4.880 | 4.661 | 5.103 | 4.951 | 3.940 |
| 3.101 | 3.253 | 3.512 | 2.902 | 3.431 | 2.305 |
| 3.109 | 4.023 | 3.465 | 2.535 | 2.957 | 1.696 |
| 8.605 | 8.308 | 8.663 | 8.706 | 8.574 | 9.639 |
| 6.307 | 6.302 | 6.256 | 6.183 | 6.374 | 4.803 |
| 4.219 | 4.112 | 4.091 | 3.640 | 3.915 | 3.041 |
| 2.138 | 2.346 | 1.781 | 1.526 | 2.381 | 2.694 |
| 5.702 | 5.687 | 5.884 | 5.650 | 5.835 | 4.153 |
| 8.045 | 8.319 | 8.249 | 8.172 | 8.003 | 7.477 |
| 4.523 | 5.099 | 4.524 | 4.902 | 5.339 | 5.614 |

|        |        |        |        |        |        |
|--------|--------|--------|--------|--------|--------|
| 4.050  | 5.821  | 5.792  | 5.088  | 5.181  | 5.114  |
| 2.219  | 2.378  | 2.613  | 1.734  | 1.871  | 1.408  |
| 3.696  | 2.143  | 4.379  | 3.030  | 3.507  | 1.937  |
| 3.951  | 3.889  | 3.675  | 3.904  | 4.568  | 3.324  |
| 6.230  | 6.285  | 6.008  | 6.132  | 6.016  | 4.570  |
| 4.169  | 2.929  | 2.658  | 3.870  | 3.057  | 2.913  |
| 3.735  | 2.690  | 1.923  | 2.737  | 2.748  | 2.406  |
| 6.185  | 6.826  | 6.522  | 6.307  | 6.564  | 4.945  |
| 7.103  | 6.579  | 7.404  | 7.429  | 7.252  | 5.103  |
| 7.465  | 7.310  | 7.477  | 7.608  | 7.411  | 5.242  |
| 8.303  | 8.195  | 8.127  | 8.287  | 8.310  | 5.147  |
| 5.233  | 5.440  | 5.145  | 5.062  | 4.961  | 3.775  |
| 2.791  | 2.969  | 3.013  | 2.649  | 2.696  | 1.403  |
| 2.417  | 2.626  | 2.595  | 2.625  | 2.270  | 2.523  |
| 4.827  | 5.477  | 5.191  | 5.411  | 5.782  | 4.451  |
| 5.240  | 5.525  | 5.169  | 4.908  | 5.142  | 5.720  |
| 3.447  | 3.833  | 3.874  | 3.599  | 3.589  | 2.548  |
| 5.864  | 5.717  | 5.634  | 5.409  | 5.245  | 4.871  |
| 5.490  | 5.431  | 5.162  | 4.876  | 5.491  | 4.655  |
| 4.341  | 3.488  | 4.595  | 3.442  | 4.494  | 1.268  |
| 7.065  | 7.432  | 7.236  | 7.373  | 7.346  | 6.736  |
| 7.685  | 8.026  | 7.738  | 8.109  | 7.803  | 6.983  |
| 2.266  | 2.480  | 2.963  | 2.778  | 2.376  | 3.672  |
| 4.029  | 4.676  | 4.263  | 4.739  | 4.766  | 5.516  |
| 5.199  | 5.709  | 5.730  | 5.492  | 5.788  | 4.708  |
| 6.898  | 7.096  | 7.244  | 6.934  | 6.779  | 6.625  |
| 10.445 | 10.224 | 10.463 | 10.703 | 10.235 | 10.979 |
| 4.552  | 4.316  | 4.805  | 4.605  | 4.598  | 5.427  |
| 10.447 | 10.267 | 10.867 | 10.432 | 10.636 | 10.648 |
| 3.792  | 3.597  | 3.448  | 4.902  | 3.874  | 4.503  |
| 3.870  | 3.564  | 2.707  | 3.612  | 2.972  | 0.975  |
| 5.960  | 5.630  | 5.530  | 5.202  | 5.118  | 5.338  |
| 2.313  | 2.244  | 2.540  | 3.097  | 3.329  | 2.743  |
| 1.751  | 1.302  | 1.180  | 2.578  | 2.237  | 4.515  |
| 3.340  | 2.930  | 3.022  | 3.170  | 3.397  | 3.954  |
| 3.568  | 2.374  | 2.599  | 3.377  | 3.773  | 3.181  |
| 2.850  | 3.130  | 2.397  | 2.656  | 2.704  | 2.296  |
| 2.647  | 2.934  | 2.156  | 3.012  | 2.218  | 3.299  |
| 5.887  | 5.885  | 5.591  | 4.693  | 4.714  | 5.285  |
| 2.596  | 1.756  | 2.404  | 2.176  | 2.665  | 2.643  |
| 3.178  | 3.240  | 2.241  | 2.254  | 2.364  | 5.270  |
| 3.911  | 2.802  | 3.645  | 2.406  | 4.072  | 4.014  |
| 2.080  | 1.558  | 2.037  | 2.273  | 2.226  | 2.458  |
| 2.937  | 2.374  | 2.675  | 2.848  | 3.143  | 3.622  |
| 2.159  | 2.409  | 2.434  | 2.431  | 2.665  | 4.208  |
| 2.880  | 1.978  | 2.104  | 3.475  | 3.216  | 5.491  |
| 4.965  | 3.334  | 3.511  | 4.875  | 4.240  | 2.899  |
| 5.906  | 5.899  | 5.457  | 5.498  | 5.059  | 5.607  |
| 4.560  | 3.919  | 3.261  | 3.861  | 4.293  | 5.496  |
| 2.395  | 2.764  | 2.690  | 2.664  | 3.033  | 2.576  |

|       |       |        |       |       |       |
|-------|-------|--------|-------|-------|-------|
| 2.347 | 3.947 | 2.281  | 1.834 | 2.129 | 2.179 |
| 4.655 | 4.546 | 3.729  | 4.065 | 4.524 | 4.797 |
| 3.847 | 2.366 | 2.305  | 3.306 | 2.490 | 2.706 |
| 3.867 | 4.396 | 3.851  | 4.425 | 3.638 | 3.759 |
| 1.894 | 3.237 | 2.658  | 3.333 | 2.348 | 3.266 |
| 3.251 | 3.063 | 3.344  | 3.648 | 2.275 | 2.551 |
| 2.571 | 2.056 | 2.756  | 2.328 | 3.089 | 2.637 |
| 2.421 | 3.078 | 3.303  | 3.475 | 3.199 | 3.471 |
| 4.058 | 3.435 | 3.274  | 4.939 | 3.730 | 3.356 |
| 3.216 | 3.680 | 4.071  | 4.099 | 3.750 | 3.277 |
| 3.345 | 2.666 | 3.834  | 3.121 | 3.054 | 2.624 |
| 3.803 | 3.467 | 3.002  | 3.185 | 3.256 | 2.136 |
| 3.360 | 3.327 | 1.938  | 3.938 | 2.949 | 4.090 |
| 5.472 | 5.881 | 5.306  | 5.768 | 5.340 | 5.555 |
| 2.655 | 2.629 | 2.185  | 2.464 | 2.430 | 2.740 |
| 3.939 | 2.704 | 2.437  | 2.704 | 1.923 | 1.757 |
| 4.421 | 5.147 | 4.169  | 5.312 | 4.665 | 4.896 |
| 3.491 | 3.052 | 1.179  | 4.425 | 2.027 | 4.464 |
| 3.962 | 3.880 | 3.237  | 4.423 | 3.030 | 4.601 |
| 4.241 | 4.234 | 3.142  | 3.637 | 3.640 | 3.640 |
| 3.010 | 2.799 | 2.678  | 2.558 | 2.678 | 3.182 |
| 2.570 | 1.930 | 2.316  | 2.512 | 2.277 | 1.659 |
| 3.275 | 2.789 | 2.902  | 2.746 | 2.475 | 1.459 |
| 2.914 | 2.568 | 3.499  | 4.208 | 2.788 | 3.168 |
| 5.123 | 5.432 | 5.352  | 5.159 | 4.046 | 3.747 |
| 2.287 | 2.531 | 2.050  | 1.735 | 2.871 | 2.420 |
| 5.661 | 3.306 | 5.209  | 5.928 | 3.913 | 2.686 |
| 4.872 | 3.611 | 3.678  | 4.113 | 4.351 | 5.202 |
| 9.725 | 9.900 | 10.135 | 9.927 | 9.049 | 9.165 |
| 8.841 | 9.132 | 9.378  | 9.142 | 8.357 | 8.544 |
| 2.228 | 1.858 | 1.245  | 2.033 | 2.356 | 2.544 |
| 1.586 | 2.256 | 1.631  | 2.006 | 2.211 | 2.596 |
| 3.118 | 4.076 | 3.250  | 4.044 | 2.920 | 4.769 |
| 2.030 | 2.856 | 2.147  | 2.178 | 1.507 | 1.428 |
| 4.068 | 3.464 | 3.514  | 4.242 | 3.962 | 4.931 |
| 2.793 | 2.267 | 2.975  | 2.650 | 2.267 | 2.110 |
| 2.156 | 2.791 | 2.810  | 2.406 | 2.028 | 3.258 |
| 1.566 | 2.658 | 2.405  | 2.063 | 3.010 | 1.949 |
| 2.792 | 2.743 | 2.561  | 3.312 | 3.168 | 2.496 |
| 3.358 | 1.962 | 3.514  | 3.662 | 2.968 | 3.116 |
| 3.686 | 3.348 | 4.465  | 3.599 | 3.925 | 4.524 |
| 3.018 | 2.590 | 2.246  | 2.316 | 2.719 | 3.517 |
| 2.168 | 2.773 | 3.769  | 2.532 | 2.813 | 2.898 |
| 3.379 | 2.318 | 1.616  | 4.393 | 3.196 | 3.683 |
| 4.445 | 1.717 | 2.328  | 2.944 | 2.079 | 1.665 |
| 3.872 | 3.647 | 3.161  | 4.808 | 4.577 | 5.193 |
| 2.438 | 1.633 | 2.451  | 2.671 | 2.028 | 2.247 |
| 2.893 | 3.053 | 2.788  | 2.519 | 2.866 | 1.868 |
| 2.707 | 2.256 | 2.009  | 2.766 | 2.127 | 3.848 |
| 3.690 | 2.475 | 2.815  | 3.608 | 3.551 | 2.856 |

|       |       |       |       |       |       |
|-------|-------|-------|-------|-------|-------|
| 2.723 | 2.636 | 3.013 | 2.427 | 2.017 | 2.558 |
| 3.914 | 3.571 | 3.743 | 3.041 | 3.716 | 2.251 |
| 2.337 | 2.477 | 2.731 | 2.877 | 1.747 | 3.350 |
| 2.809 | 1.315 | 1.579 | 1.933 | 2.071 | 3.778 |
| 2.426 | 3.041 | 2.794 | 3.380 | 3.422 | 3.447 |
| 4.178 | 2.924 | 2.324 | 3.715 | 2.976 | 3.751 |
| 4.581 | 4.653 | 4.331 | 3.908 | 3.354 | 3.741 |
| 4.178 | 4.672 | 4.327 | 4.014 | 3.910 | 4.657 |
| 2.005 | 3.105 | 3.247 | 2.223 | 2.100 | 2.997 |
| 3.196 | 3.257 | 2.787 | 2.051 | 2.700 | 2.999 |
| 2.702 | 2.609 | 1.482 | 3.816 | 2.553 | 1.333 |
| 2.581 | 4.910 | 4.124 | 4.482 | 4.382 | 3.788 |
| 1.789 | 2.206 | 3.324 | 2.724 | 2.593 | 2.609 |
| 3.106 | 3.638 | 3.448 | 4.844 | 3.055 | 4.429 |
| 1.533 | 2.372 | 1.638 | 1.925 | 2.523 | 2.804 |
| 5.132 | 4.556 | 4.365 | 4.820 | 3.912 | 6.068 |
| 3.960 | 3.433 | 3.518 | 3.659 | 2.733 | 4.605 |
| 5.081 | 4.033 | 4.014 | 4.912 | 4.546 | 4.891 |
| 2.587 | 3.179 | 3.098 | 2.471 | 1.549 | 2.149 |
| 2.248 | 2.370 | 1.699 | 2.976 | 1.825 | 2.573 |
| 2.225 | 2.076 | 1.949 | 2.678 | 2.264 | 2.298 |
| 3.879 | 3.231 | 3.506 | 3.760 | 3.484 | 3.682 |
| 2.761 | 2.611 | 2.369 | 2.530 | 3.612 | 2.618 |
| 2.389 | 2.228 | 2.548 | 2.378 | 2.471 | 3.177 |
| 2.977 | 2.679 | 2.618 | 2.546 | 2.221 | 3.616 |
| 2.279 | 3.129 | 2.849 | 2.788 | 2.911 | 3.734 |
| 3.681 | 1.551 | 2.234 | 2.796 | 2.240 | 2.247 |
| 3.260 | 1.936 | 2.361 | 3.586 | 1.816 | 3.288 |
| 1.509 | 3.354 | 3.245 | 2.020 | 3.300 | 2.793 |
| 5.496 | 4.657 | 5.362 | 5.425 | 5.041 | 5.039 |
| 3.540 | 1.526 | 3.990 | 3.707 | 2.509 | 3.117 |
| 3.830 | 3.476 | 3.279 | 4.320 | 3.721 | 4.948 |
| 2.986 | 1.362 | 1.818 | 2.607 | 1.763 | 2.442 |
| 2.635 | 2.998 | 2.212 | 2.866 | 2.637 | 3.050 |
| 3.242 | 2.751 | 1.776 | 3.248 | 3.257 | 2.971 |
| 6.466 | 6.013 | 6.426 | 6.144 | 5.285 | 5.465 |
| 3.161 | 3.241 | 3.396 | 3.908 | 3.117 | 2.542 |
| 4.665 | 4.723 | 4.433 | 3.611 | 3.640 | 3.176 |
| 5.102 | 5.124 | 5.141 | 5.268 | 5.712 | 6.359 |
| 4.211 | 5.859 | 6.236 | 4.539 | 4.016 | 4.599 |
| 2.230 | 4.765 | 3.646 | 2.433 | 1.768 | 1.982 |
| 5.175 | 4.887 | 5.092 | 3.903 | 4.509 | 5.706 |
| 4.566 | 4.364 | 4.949 | 4.207 | 4.175 | 3.510 |
| 4.548 | 4.692 | 4.756 | 4.592 | 4.436 | 5.679 |
| 6.938 | 5.700 | 5.957 | 5.917 | 6.362 | 3.781 |
| 6.500 | 7.025 | 6.672 | 7.201 | 7.117 | 8.338 |
| 4.242 | 3.453 | 3.661 | 3.661 | 3.979 | 2.655 |
| 8.995 | 8.931 | 9.047 | 8.979 | 9.001 | 8.270 |
| 6.556 | 6.409 | 6.719 | 6.620 | 6.650 | 6.420 |
| 4.729 | 4.718 | 4.136 | 4.414 | 4.663 | 3.589 |

|       |       |       |       |       |       |
|-------|-------|-------|-------|-------|-------|
| 1.674 | 2.467 | 2.258 | 2.226 | 1.980 | 2.174 |
| 4.342 | 3.389 | 3.318 | 3.030 | 4.343 | 3.892 |
| 2.410 | 3.101 | 3.445 | 3.449 | 3.488 | 5.531 |
| 3.827 | 5.444 | 4.918 | 5.064 | 5.214 | 3.695 |
| 3.504 | 3.960 | 4.024 | 3.264 | 3.488 | 2.481 |
| 7.442 | 7.680 | 7.447 | 7.610 | 7.519 | 8.569 |
| 6.427 | 6.125 | 6.188 | 6.291 | 6.359 | 7.314 |
| 1.808 | 3.626 | 2.907 | 3.376 | 1.974 | 3.732 |
| 3.238 | 3.805 | 3.179 | 3.310 | 3.434 | 3.501 |
| 5.566 | 6.152 | 5.908 | 6.168 | 6.102 | 6.873 |
| 4.454 | 4.248 | 4.885 | 4.743 | 4.274 | 2.546 |
| 4.919 | 4.815 | 4.748 | 5.001 | 4.761 | 4.287 |
| 6.463 | 6.511 | 6.718 | 6.311 | 6.457 | 5.791 |
| 5.686 | 5.339 | 5.324 | 5.374 | 5.266 | 4.940 |
| 4.795 | 4.966 | 5.042 | 4.896 | 4.949 | 4.220 |
| 8.039 | 8.293 | 8.059 | 8.098 | 8.098 | 7.301 |
| 5.599 | 5.701 | 5.600 | 5.410 | 5.599 | 4.192 |
| 5.338 | 5.771 | 6.182 | 5.729 | 5.862 | 3.837 |
| 4.939 | 4.578 | 4.503 | 4.607 | 4.668 | 4.547 |
| 2.107 | 3.201 | 3.459 | 2.468 | 2.817 | 2.955 |
| 6.266 | 6.739 | 6.692 | 6.426 | 6.732 | 6.185 |
| 5.417 | 5.760 | 5.827 | 5.749 | 5.654 | 4.941 |
| 3.439 | 3.112 | 3.541 | 3.445 | 3.634 | 2.105 |
| 5.281 | 5.830 | 5.744 | 5.558 | 5.715 | 7.114 |
| 2.488 | 3.439 | 3.255 | 2.924 | 3.130 | 3.302 |
| 6.142 | 6.308 | 6.344 | 6.244 | 5.893 | 5.248 |
| 4.482 | 3.903 | 4.415 | 4.727 | 4.864 | 6.045 |
| 5.020 | 4.547 | 4.214 | 4.968 | 4.976 | 5.920 |
| 4.424 | 4.400 | 5.167 | 5.549 | 5.448 | 5.919 |
| 2.425 | 2.639 | 2.886 | 2.798 | 2.825 | 3.225 |
| 7.121 | 7.328 | 7.150 | 6.901 | 7.167 | 6.366 |
| 4.470 | 3.928 | 3.442 | 2.975 | 4.212 | 2.945 |
| 3.215 | 3.896 | 3.551 | 3.757 | 2.457 | 3.524 |
| 7.160 | 7.451 | 7.281 | 7.205 | 7.157 | 6.435 |
| 4.835 | 5.193 | 5.189 | 5.383 | 5.044 | 4.695 |
| 6.554 | 6.872 | 6.776 | 6.550 | 6.910 | 5.822 |
| 5.981 | 6.208 | 6.444 | 6.176 | 6.070 | 5.443 |
| 5.630 | 5.675 | 5.533 | 5.399 | 5.757 | 6.287 |
| 6.026 | 6.834 | 6.596 | 6.452 | 6.663 | 5.855 |
| 4.886 | 5.081 | 5.162 | 4.930 | 4.987 | 3.990 |
| 7.877 | 6.906 | 7.424 | 7.752 | 7.391 | 7.297 |
| 3.717 | 4.038 | 3.860 | 3.753 | 3.761 | 4.121 |
| 4.347 | 3.957 | 3.957 | 3.769 | 3.159 | 3.662 |
| 6.102 | 4.671 | 4.549 | 6.258 | 5.659 | 4.252 |
| 8.961 | 7.635 | 8.289 | 8.952 | 7.647 | 8.621 |
| 3.263 | 2.733 | 2.117 | 1.919 | 3.874 | 3.507 |
| 1.347 | 0.959 | 1.682 | 1.584 | 1.522 | 1.864 |
| 3.137 | 2.285 | 2.041 | 1.609 | 2.399 | 2.117 |
| 2.067 | 2.231 | 1.895 | 1.941 | 2.360 | 2.041 |
| 5.628 | 5.588 | 5.130 | 5.203 | 4.385 | 5.382 |



|       |       |       |       |       |       |
|-------|-------|-------|-------|-------|-------|
| 4.399 | 5.012 | 4.462 | 4.941 | 4.159 | 3.708 |
| 3.983 | 4.147 | 3.936 | 2.492 | 3.870 | 2.927 |
| 4.766 | 4.378 | 3.835 | 4.566 | 4.423 | 4.460 |
| 1.751 | 2.455 | 2.208 | 2.399 | 2.377 | 2.524 |
| 4.702 | 4.083 | 4.492 | 5.027 | 4.718 | 4.279 |
| 3.327 | 3.296 | 3.040 | 3.107 | 3.665 | 3.630 |
| 2.376 | 2.394 | 2.414 | 2.214 | 2.298 | 2.516 |
| 4.861 | 4.332 | 3.554 | 4.682 | 3.849 | 4.780 |
| 3.286 | 3.052 | 3.270 | 3.416 | 3.208 | 3.181 |
| 4.375 | 4.719 | 4.444 | 4.295 | 4.370 | 4.958 |
| 5.797 | 5.279 | 5.457 | 5.384 | 4.490 | 5.624 |
| 4.073 | 4.173 | 3.659 | 3.869 | 2.888 | 2.940 |
| 4.894 | 3.978 | 3.475 | 4.504 | 3.548 | 3.730 |
| 7.171 | 7.067 | 6.732 | 6.338 | 5.167 | 6.521 |
| 5.296 | 2.516 | 5.501 | 5.777 | 5.252 | 3.056 |
| 2.488 | 3.163 | 2.903 | 2.809 | 2.482 | 3.647 |
| 2.602 | 3.489 | 1.717 | 3.024 | 2.580 | 2.524 |
| 2.367 | 1.892 | 2.476 | 2.150 | 2.494 | 3.664 |
| 1.334 | 0.985 | 1.675 | 1.410 | 1.446 | 1.506 |
| 3.064 | 3.742 | 3.416 | 3.278 | 2.434 | 3.750 |
| 2.599 | 2.788 | 2.538 | 1.740 | 3.267 | 2.927 |
| 3.252 | 4.017 | 4.364 | 2.771 | 2.855 | 4.463 |
| 2.273 | 2.465 | 2.013 | 2.439 | 2.511 | 2.688 |
| 1.694 | 2.885 | 2.922 | 1.894 | 1.428 | 2.211 |
| 7.278 | 7.363 | 6.943 | 7.286 | 5.896 | 7.779 |
| 4.663 | 4.201 | 3.742 | 4.404 | 4.722 | 5.920 |
| 4.226 | 4.142 | 4.295 | 3.722 | 3.904 | 4.942 |
| 3.029 | 3.464 | 3.325 | 3.401 | 3.325 | 4.691 |
| 2.463 | 2.349 | 2.477 | 3.337 | 3.551 | 3.474 |
| 2.355 | 2.927 | 3.481 | 3.151 | 2.380 | 4.268 |
| 3.266 | 2.578 | 2.336 | 3.421 | 2.460 | 3.813 |
| 4.336 | 4.822 | 3.678 | 4.271 | 4.945 | 5.619 |
| 3.367 | 3.365 | 3.176 | 3.456 | 2.657 | 3.199 |
| 2.782 | 3.064 | 2.666 | 2.642 | 1.459 | 2.333 |
| 4.124 | 2.830 | 3.010 | 3.738 | 3.662 | 3.984 |
| 5.482 | 4.939 | 4.671 | 5.494 | 5.004 | 5.930 |
| 2.210 | 1.987 | 1.843 | 2.415 | 2.427 | 2.718 |
| 4.094 | 4.095 | 4.449 | 4.338 | 3.837 | 4.093 |
| 9.640 | 9.611 | 9.509 | 9.784 | 8.966 | 9.837 |
| 5.312 | 4.604 | 5.091 | 5.995 | 6.471 | 6.793 |
| 2.754 | 2.066 | 2.195 | 3.416 | 2.801 | 4.806 |
| 1.619 | 1.816 | 2.354 | 3.186 | 1.650 | 4.245 |
| 3.744 | 4.693 | 3.742 | 4.080 | 4.177 | 3.350 |
| 2.544 | 3.613 | 3.344 | 2.973 | 1.180 | 3.818 |
| 8.025 | 7.477 | 7.817 | 6.806 | 5.409 | 7.715 |
| 5.175 | 4.936 | 4.735 | 4.841 | 4.511 | 4.552 |
| 2.017 | 3.179 | 3.047 | 1.336 | 1.851 | 1.367 |
| 2.156 | 3.272 | 2.034 | 2.765 | 2.762 | 1.111 |
| 6.204 | 4.872 | 5.010 | 5.310 | 5.326 | 6.004 |
| 2.648 | 2.117 | 2.332 | 2.003 | 1.582 | 1.539 |

|       |       |       |       |       |       |
|-------|-------|-------|-------|-------|-------|
| 2.446 | 2.119 | 1.489 | 2.861 | 2.647 | 3.634 |
| 2.797 | 2.847 | 3.213 | 4.368 | 4.391 | 8.445 |
| 5.279 | 4.793 | 4.262 | 5.601 | 4.967 | 6.337 |
| 4.324 | 4.733 | 4.324 | 3.895 | 4.410 | 4.897 |
| 1.491 | 1.784 | 1.382 | 3.100 | 2.625 | 3.410 |
| 3.439 | 2.206 | 3.230 | 1.677 | 2.231 | 1.526 |
| 3.064 | 3.132 | 3.746 | 3.496 | 4.198 | 3.640 |
| 3.676 | 4.674 | 3.322 | 4.344 | 4.206 | 4.892 |
| 2.340 | 2.860 | 2.652 | 2.902 | 1.773 | 3.259 |
| 4.530 | 3.891 | 4.271 | 3.873 | 3.932 | 4.110 |
| 1.985 | 2.185 | 3.050 | 2.664 | 2.481 | 2.428 |
| 2.219 | 3.351 | 3.241 | 2.745 | 2.807 | 3.134 |
| 3.182 | 2.092 | 2.271 | 2.677 | 3.292 | 2.047 |
| 2.394 | 1.774 | 2.893 | 2.348 | 2.288 | 2.278 |
| 4.185 | 5.419 | 4.222 | 5.261 | 5.703 | 4.939 |
| 1.738 | 1.306 | 1.893 | 1.795 | 1.723 | 1.783 |
| 2.992 | 2.528 | 2.500 | 1.720 | 1.849 | 2.592 |
| 2.361 | 2.077 | 3.045 | 1.783 | 1.926 | 2.141 |
| 5.602 | 5.597 | 5.020 | 5.282 | 5.585 | 3.906 |
| 1.816 | 1.883 | 2.308 | 2.145 | 1.492 | 2.788 |
| 2.209 | 2.235 | 1.306 | 2.737 | 1.891 | 1.820 |
| 4.395 | 3.571 | 2.439 | 3.715 | 2.873 | 2.899 |
| 3.684 | 3.640 | 4.323 | 4.571 | 2.746 | 4.677 |
| 6.913 | 6.519 | 6.362 | 6.506 | 6.663 | 7.319 |
| 3.401 | 2.645 | 3.447 | 3.504 | 2.742 | 3.333 |
| 4.020 | 3.542 | 4.218 | 4.452 | 2.962 | 5.132 |
| 2.292 | 3.978 | 3.106 | 2.571 | 3.225 | 3.646 |
| 1.407 | 1.051 | 1.209 | 2.988 | 1.037 | 3.366 |
| 1.287 | 1.414 | 2.184 | 1.383 | 0.967 | 1.914 |
| 3.297 | 2.886 | 2.149 | 4.070 | 3.194 | 3.770 |
| 3.983 | 2.940 | 2.536 | 3.283 | 1.877 | 4.137 |
| 4.210 | 2.210 | 3.311 | 4.287 | 3.196 | 4.261 |
| 1.605 | 1.923 | 2.458 | 2.363 | 1.984 | 2.514 |
| 2.583 | 2.360 | 2.784 | 2.523 | 2.848 | 2.929 |
| 3.680 | 3.259 | 3.145 | 3.413 | 3.173 | 2.659 |
| 4.291 | 4.012 | 3.166 | 4.626 | 3.939 | 4.285 |
| 3.775 | 3.416 | 2.730 | 4.572 | 3.611 | 4.545 |
| 6.354 | 4.382 | 4.582 | 5.203 | 4.902 | 3.832 |
| 5.876 | 3.966 | 4.238 | 4.754 | 4.511 | 3.873 |
| 5.919 | 4.051 | 4.557 | 4.962 | 4.658 | 3.966 |
| 1.818 | 2.063 | 2.647 | 2.028 | 2.222 | 4.338 |
| 1.872 | 1.831 | 1.971 | 2.446 | 2.675 | 2.730 |
| 2.727 | 3.262 | 3.189 | 4.359 | 3.238 | 2.940 |
| 4.399 | 2.938 | 3.459 | 4.583 | 3.398 | 4.361 |
| 4.714 | 3.656 | 3.355 | 4.343 | 4.295 | 2.209 |
| 2.250 | 2.926 | 2.532 | 2.786 | 3.076 | 2.372 |
| 3.764 | 3.609 | 3.290 | 3.247 | 4.148 | 4.237 |
| 3.481 | 1.537 | 2.458 | 2.625 | 3.029 | 1.243 |
| 2.569 | 1.880 | 1.862 | 2.892 | 2.995 | 3.734 |
| 3.146 | 3.432 | 2.740 | 2.889 | 3.528 | 3.408 |

|       |       |       |       |       |       |
|-------|-------|-------|-------|-------|-------|
| 3.554 | 4.080 | 3.269 | 5.270 | 3.853 | 4.809 |
| 2.547 | 1.633 | 2.136 | 3.488 | 2.182 | 2.250 |
| 4.177 | 3.549 | 4.080 | 4.976 | 3.922 | 4.930 |
| 1.764 | 1.983 | 1.204 | 2.582 | 1.531 | 2.895 |
| 1.662 | 0.546 | 0.812 | 1.015 | 0.854 | 1.139 |
| 2.238 | 2.271 | 2.047 | 2.393 | 1.939 | 2.082 |
| 4.270 | 3.625 | 3.932 | 4.045 | 3.613 | 3.932 |
| 2.465 | 2.629 | 1.726 | 2.572 | 2.259 | 2.049 |
| 5.316 | 5.629 | 5.102 | 5.190 | 4.823 | 3.270 |
| 3.264 | 2.463 | 3.147 | 2.784 | 2.797 | 3.425 |
| 1.756 | 1.515 | 1.619 | 2.620 | 1.035 | 0.871 |
| 4.374 | 2.977 | 3.488 | 3.611 | 2.793 | 3.634 |
| 3.735 | 3.200 | 2.828 | 4.316 | 2.969 | 4.371 |
| 2.543 | 2.766 | 2.643 | 3.715 | 2.755 | 3.616 |
| 2.473 | 2.497 | 2.442 | 2.302 | 2.707 | 1.606 |
| 5.462 | 3.402 | 3.538 | 4.247 | 4.539 | 3.101 |
| 4.987 | 4.315 | 4.269 | 5.045 | 3.891 | 2.593 |
| 2.019 | 1.801 | 1.927 | 2.097 | 2.009 | 1.813 |
| 2.566 | 2.862 | 3.209 | 3.178 | 2.794 | 2.361 |
| 5.145 | 4.929 | 3.877 | 5.060 | 4.849 | 5.562 |
| 5.521 | 5.066 | 5.372 | 5.110 | 5.069 | 5.387 |
| 2.767 | 2.586 | 1.877 | 2.177 | 2.715 | 2.280 |
| 2.743 | 2.679 | 3.287 | 3.174 | 2.120 | 3.318 |
| 3.411 | 3.526 | 3.282 | 3.712 | 3.207 | 3.209 |
| 2.810 | 2.430 | 2.549 | 3.578 | 2.361 | 3.710 |
| 4.312 | 3.393 | 3.298 | 4.701 | 4.266 | 4.710 |
| 2.940 | 2.204 | 2.598 | 2.010 | 1.628 | 2.712 |
| 2.960 | 3.561 | 3.280 | 2.853 | 2.913 | 3.235 |
| 2.141 | 3.216 | 2.143 | 3.296 | 2.047 | 2.478 |
| 3.576 | 2.888 | 1.744 | 3.889 | 3.450 | 8.163 |
| 3.255 | 1.721 | 2.538 | 3.634 | 2.506 | 1.947 |
| 2.255 | 2.037 | 2.480 | 2.894 | 3.843 | 2.480 |
| 3.836 | 3.144 | 3.543 | 3.617 | 2.902 | 3.892 |
| 3.694 | 1.989 | 3.046 | 3.533 | 3.690 | 4.999 |
| 4.310 | 4.221 | 4.504 | 3.673 | 4.232 | 4.515 |
| 3.168 | 2.573 | 2.321 | 3.613 | 2.174 | 3.227 |
| 4.651 | 4.169 | 3.491 | 5.207 | 4.634 | 5.363 |
| 5.016 | 4.383 | 3.625 | 5.375 | 4.619 | 5.501 |
| 2.810 | 1.518 | 1.455 | 5.200 | 3.731 | 2.594 |
| 2.571 | 3.866 | 3.135 | 4.552 | 4.518 | 6.471 |
| 2.479 | 3.289 | 2.409 | 3.708 | 2.103 | 4.068 |
| 4.550 | 3.427 | 4.650 | 4.001 | 3.826 | 4.591 |
| 2.707 | 1.707 | 1.602 | 2.984 | 2.553 | 4.291 |
| 5.756 | 5.134 | 5.243 | 5.535 | 5.170 | 5.787 |
| 4.663 | 3.786 | 4.709 | 5.573 | 4.466 | 6.105 |
| 2.891 | 2.685 | 2.510 | 2.860 | 1.908 | 1.722 |
| 3.787 | 4.023 | 3.336 | 3.565 | 3.793 | 3.692 |
| 4.951 | 3.826 | 3.909 | 4.389 | 4.028 | 4.146 |
| 1.735 | 2.219 | 2.171 | 2.520 | 2.801 | 2.839 |
| 1.912 | 2.467 | 2.520 | 2.437 | 2.247 | 2.622 |

|       |       |       |       |       |       |
|-------|-------|-------|-------|-------|-------|
| 5.718 | 4.819 | 5.088 | 5.197 | 4.268 | 5.416 |
| 1.486 | 2.441 | 2.670 | 2.815 | 2.314 | 2.693 |
| 2.601 | 2.206 | 2.386 | 2.668 | 3.245 | 2.507 |
| 2.953 | 3.192 | 2.644 | 3.426 | 3.463 | 4.332 |
| 3.007 | 3.408 | 3.631 | 3.489 | 3.580 | 4.015 |
| 3.030 | 2.265 | 3.411 | 3.407 | 2.173 | 2.982 |
| 2.305 | 1.318 | 1.752 | 2.915 | 2.507 | 1.656 |
| 2.866 | 3.211 | 3.155 | 3.089 | 3.672 | 3.481 |
| 2.658 | 2.444 | 2.401 | 2.705 | 2.150 | 2.115 |
| 3.290 | 2.178 | 1.528 | 2.377 | 2.103 | 3.463 |
| 3.306 | 2.857 | 2.512 | 3.239 | 2.715 | 3.458 |
| 3.145 | 2.182 | 2.779 | 3.589 | 2.680 | 3.424 |
| 2.018 | 1.889 | 1.426 | 2.725 | 2.141 | 3.123 |
| 2.519 | 1.518 | 3.025 | 2.232 | 2.846 | 2.614 |
| 3.290 | 2.699 | 1.627 | 3.219 | 3.050 | 3.648 |
| 5.732 | 5.221 | 6.008 | 5.741 | 5.053 | 5.478 |
| 1.903 | 2.077 | 2.567 | 1.580 | 2.488 | 2.601 |
| 3.256 | 4.222 | 3.725 | 4.543 | 4.481 | 4.248 |
| 6.674 | 5.351 | 5.483 | 6.726 | 6.276 | 4.701 |
| 2.939 | 3.031 | 1.681 | 1.886 | 1.929 | 3.717 |
| 3.762 | 3.426 | 2.959 | 3.298 | 3.440 | 3.596 |
| 1.593 | 2.260 | 3.031 | 3.103 | 1.799 | 1.613 |
| 4.212 | 4.266 | 3.615 | 4.442 | 3.812 | 5.828 |
| 3.489 | 2.441 | 1.968 | 3.801 | 1.954 | 3.207 |
| 5.970 | 5.144 | 5.749 | 5.237 | 5.381 | 4.665 |
| 1.868 | 2.404 | 2.101 | 4.012 | 2.946 | 2.946 |
| 4.476 | 4.349 | 4.221 | 4.482 | 4.396 | 3.760 |
| 2.929 | 2.390 | 2.864 | 3.030 | 1.265 | 2.059 |
| 4.272 | 3.563 | 3.065 | 3.484 | 3.175 | 3.916 |
| 3.415 | 4.374 | 4.316 | 4.572 | 4.740 | 5.629 |
| 2.787 | 2.823 | 4.060 | 2.870 | 2.653 | 2.494 |
| 2.590 | 2.246 | 1.303 | 2.941 | 2.163 | 2.053 |
| 4.354 | 1.456 | 1.895 | 4.138 | 2.942 | 3.400 |
| 2.331 | 2.114 | 1.728 | 2.894 | 2.921 | 1.668 |
| 5.443 | 2.055 | 1.604 | 4.623 | 3.398 | 2.549 |
| 3.303 | 3.216 | 3.512 | 2.373 | 2.718 | 4.207 |
| 2.641 | 2.178 | 2.943 | 2.489 | 2.270 | 2.489 |
| 4.054 | 4.316 | 3.480 | 3.809 | 4.100 | 5.959 |
| 4.302 | 3.851 | 4.052 | 4.654 | 4.451 | 3.524 |
| 2.856 | 2.507 | 2.675 | 2.636 | 3.136 | 2.716 |
| 2.753 | 2.451 | 3.210 | 3.692 | 2.247 | 4.132 |
| 3.718 | 2.618 | 3.158 | 3.138 | 3.516 | 3.507 |
| 1.732 | 2.259 | 1.427 | 2.210 | 1.951 | 2.395 |
| 3.083 | 2.090 | 3.619 | 4.191 | 3.750 | 4.065 |
| 1.464 | 1.378 | 1.916 | 3.056 | 3.287 | 3.360 |
| 2.452 | 3.308 | 0.952 | 3.695 | 2.218 | 2.021 |
| 4.995 | 4.497 | 4.197 | 4.740 | 3.491 | 5.160 |
| 3.528 | 1.809 | 1.997 | 2.874 | 2.571 | 1.703 |
| 1.151 | 1.129 | 1.151 | 1.846 | 1.642 | 2.955 |
| 4.298 | 4.077 | 2.525 | 3.983 | 2.767 | 5.182 |

|       |       |       |       |       |       |
|-------|-------|-------|-------|-------|-------|
| 3.850 | 2.989 | 3.251 | 3.707 | 3.040 | 2.546 |
| 2.549 | 1.932 | 2.679 | 2.178 | 2.522 | 3.538 |
| 3.115 | 2.738 | 2.760 | 2.431 | 2.373 | 2.117 |
| 7.650 | 5.904 | 6.968 | 7.646 | 6.368 | 6.636 |
| 5.217 | 2.714 | 4.619 | 6.031 | 4.519 | 4.029 |
| 2.346 | 2.158 | 2.355 | 2.203 | 2.347 | 2.642 |
| 3.841 | 3.907 | 3.929 | 4.059 | 4.474 | 3.886 |
| 2.935 | 1.664 | 2.987 | 2.595 | 2.204 | 3.458 |
| 6.691 | 5.476 | 6.293 | 6.771 | 5.828 | 5.794 |
| 3.797 | 4.796 | 4.274 | 4.211 | 4.625 | 3.728 |
| 3.499 | 2.797 | 3.360 | 3.955 | 2.086 | 2.321 |
| 2.697 | 1.795 | 2.188 | 3.233 | 2.485 | 1.886 |
| 2.043 | 2.825 | 3.361 | 2.448 | 3.005 | 3.073 |
| 1.491 | 2.347 | 2.787 | 1.664 | 0.961 | 3.303 |
| 2.397 | 0.879 | 1.243 | 1.787 | 2.394 | 2.317 |
| 6.761 | 4.295 | 5.824 | 6.290 | 4.667 | 2.424 |
| 2.303 | 2.942 | 2.492 | 2.492 | 2.595 | 2.138 |
| 1.606 | 2.526 | 1.502 | 2.486 | 2.736 | 2.881 |
| 2.363 | 3.537 | 2.936 | 3.670 | 2.948 | 5.256 |
| 1.769 | 2.610 | 2.655 | 2.858 | 2.578 | 3.022 |
| 2.443 | 1.865 | 2.119 | 2.696 | 1.882 | 3.297 |
| 4.812 | 3.732 | 4.170 | 5.369 | 4.394 | 5.200 |
| 2.761 | 1.932 | 2.531 | 3.364 | 2.790 | 3.839 |
| 2.419 | 2.354 | 2.871 | 3.390 | 2.613 | 2.144 |
| 3.462 | 2.573 | 2.000 | 2.934 | 2.637 | 2.805 |
| 2.746 | 1.646 | 1.812 | 1.728 | 1.664 | 3.139 |
| 2.319 | 0.469 | 1.478 | 2.202 | 2.437 | 2.623 |
| 1.191 | 2.279 | 1.805 | 1.929 | 1.337 | 2.229 |
| 5.517 | 6.136 | 5.517 | 5.090 | 4.386 | 5.660 |
| 4.990 | 5.745 | 5.156 | 4.809 | 4.585 | 5.269 |
| 2.678 | 2.863 | 2.490 | 2.637 | 2.541 | 2.533 |
| 2.057 | 2.328 | 2.431 | 2.252 | 2.053 | 1.969 |
| 2.273 | 1.532 | 2.543 | 1.881 | 2.134 | 1.544 |
| 1.652 | 1.910 | 1.533 | 2.634 | 1.100 | 1.206 |
| 2.546 | 2.195 | 1.923 | 1.551 | 2.115 | 2.894 |
| 1.572 | 1.402 | 1.436 | 0.779 | 1.290 | 1.901 |
| 3.605 | 4.227 | 5.109 | 4.793 | 3.679 | 4.910 |
| 5.159 | 5.196 | 5.036 | 5.214 | 5.402 | 3.188 |
| 7.173 | 7.294 | 7.382 | 6.834 | 7.487 | 6.243 |
| 0.638 | 3.251 | 4.261 | 0.748 | 3.997 | 0.895 |
| 7.453 | 7.848 | 7.545 | 7.628 | 7.421 | 6.076 |
| 3.846 | 3.794 | 3.948 | 3.917 | 3.842 | 4.282 |
| 3.521 | 3.358 | 3.945 | 3.832 | 4.312 | 2.903 |
| 2.923 | 3.380 | 2.392 | 2.578 | 2.829 | 3.012 |
| 8.408 | 8.611 | 8.268 | 8.801 | 8.793 | 5.723 |
| 4.883 | 4.167 | 4.489 | 5.129 | 4.246 | 1.664 |
| 1.878 | 2.164 | 1.881 | 2.229 | 2.707 | 3.271 |
| 2.937 | 2.845 | 2.543 | 2.833 | 2.739 | 3.475 |
| 4.796 | 4.393 | 4.703 | 4.731 | 4.907 | 3.870 |
| 1.541 | 1.558 | 2.297 | 1.558 | 1.563 | 2.036 |

|       |       |       |       |       |       |
|-------|-------|-------|-------|-------|-------|
| 3.678 | 3.946 | 3.970 | 4.534 | 4.211 | 2.779 |
| 3.692 | 3.895 | 3.906 | 2.837 | 3.405 | 3.655 |
| 3.102 | 2.754 | 3.100 | 3.303 | 3.070 | 4.514 |
| 2.850 | 1.825 | 3.718 | 2.912 | 3.240 | 3.014 |
| 2.471 | 2.060 | 2.240 | 1.931 | 2.163 | 2.287 |
| 3.011 | 2.829 | 1.807 | 2.931 | 3.426 | 2.301 |
| 4.006 | 3.503 | 3.903 | 4.359 | 3.553 | 4.302 |
| 3.488 | 3.734 | 3.729 | 4.362 | 3.832 | 3.750 |
| 3.400 | 3.546 | 4.002 | 4.029 | 3.827 | 4.524 |
| 2.699 | 3.485 | 3.153 | 2.751 | 3.594 | 3.135 |
| 3.802 | 3.704 | 2.756 | 3.541 | 3.596 | 4.227 |
| 3.067 | 2.981 | 2.025 | 2.787 | 2.467 | 4.189 |
| 1.442 | 1.717 | 1.810 | 1.292 | 1.541 | 1.196 |
| 3.604 | 3.915 | 3.889 | 4.780 | 5.316 | 7.405 |
| 3.417 | 5.073 | 4.274 | 5.193 | 4.414 | 4.939 |
| 1.771 | 2.156 | 2.119 | 2.268 | 2.018 | 2.268 |
| 2.966 | 3.235 | 3.341 | 3.480 | 3.364 | 5.478 |
| 3.191 | 3.149 | 3.801 | 3.405 | 3.798 | 3.810 |
| 2.771 | 2.483 | 2.807 | 2.780 | 2.890 | 3.144 |
| 2.015 | 1.721 | 1.388 | 1.835 | 2.017 | 3.520 |
| 3.953 | 4.545 | 3.554 | 4.200 | 4.156 | 4.336 |
| 4.245 | 3.364 | 4.443 | 4.719 | 3.751 | 3.928 |
| 2.349 | 2.313 | 1.985 | 2.218 | 2.637 | 3.164 |
| 4.482 | 4.159 | 4.078 | 3.480 | 4.041 | 4.390 |
| 2.498 | 3.182 | 2.897 | 2.320 | 2.816 | 1.988 |
| 2.287 | 2.622 | 2.134 | 2.542 | 2.241 | 3.514 |
| 2.543 | 2.582 | 2.307 | 2.516 | 2.201 | 2.265 |
| 2.104 | 3.414 | 3.076 | 3.347 | 3.234 | 3.432 |
| 2.984 | 3.010 | 2.859 | 2.660 | 2.859 | 2.808 |
| 2.477 | 2.964 | 1.939 | 3.324 | 2.422 | 3.853 |
| 2.176 | 2.728 | 1.855 | 3.110 | 2.551 | 3.450 |
| 2.980 | 2.525 | 2.538 | 3.835 | 3.306 | 4.041 |
| 2.865 | 3.483 | 3.252 | 3.486 | 2.868 | 3.959 |
| 6.659 | 6.770 | 6.696 | 6.803 | 6.550 | 5.966 |
| 2.137 | 2.178 | 1.822 | 2.181 | 2.330 | 4.214 |
| 4.457 | 3.839 | 4.326 | 3.660 | 3.124 | 0.862 |
| 1.780 | 2.051 | 2.119 | 1.254 | 1.214 | 3.688 |
| 7.245 | 8.063 | 7.532 | 7.173 | 7.174 | 8.080 |
| 2.389 | 2.766 | 2.877 | 2.796 | 3.104 | 4.343 |
| 3.261 | 2.532 | 2.560 | 3.439 | 2.945 | 1.933 |
| 2.707 | 3.676 | 2.762 | 3.028 | 2.972 | 2.325 |
| 3.225 | 2.533 | 2.860 | 4.632 | 2.979 | 4.330 |
| 2.536 | 2.456 | 3.014 | 2.830 | 2.206 | 2.754 |
| 3.529 | 3.433 | 3.128 | 2.910 | 3.553 | 3.835 |
| 1.196 | 1.613 | 1.418 | 1.136 | 1.200 | 3.506 |
| 2.795 | 3.355 | 2.617 | 2.682 | 2.683 | 3.575 |
| 4.373 | 4.331 | 4.335 | 4.392 | 4.089 | 1.920 |
| 3.149 | 1.900 | 2.423 | 3.661 | 1.794 | 1.611 |
| 2.328 | 2.469 | 2.772 | 3.255 | 2.027 | 1.229 |
| 5.031 | 4.634 | 4.595 | 4.861 | 5.495 | 2.419 |

|       |       |       |       |       |       |
|-------|-------|-------|-------|-------|-------|
| 2.285 | 2.382 | 2.812 | 2.864 | 2.589 | 3.610 |
| 2.282 | 2.240 | 2.448 | 1.872 | 3.083 | 1.684 |
| 4.584 | 4.306 | 4.318 | 3.690 | 3.982 | 4.597 |
| 3.713 | 3.432 | 2.941 | 3.499 | 3.433 | 2.386 |
| 3.489 | 3.739 | 3.143 | 3.333 | 3.653 | 1.750 |
| 2.232 | 2.954 | 2.375 | 2.930 | 2.896 | 4.169 |
| 1.522 | 2.732 | 2.562 | 2.844 | 2.758 | 3.154 |
| 2.449 | 2.661 | 2.257 | 3.202 | 3.136 | 3.033 |
| 2.022 | 2.206 | 2.421 | 2.118 | 2.167 | 2.436 |
| 4.072 | 3.117 | 3.854 | 4.719 | 3.718 | 4.507 |
| 4.258 | 4.480 | 4.909 | 4.645 | 4.565 | 1.878 |
| 2.844 | 3.284 | 2.883 | 2.365 | 2.374 | 2.094 |
| 2.686 | 2.618 | 2.789 | 2.944 | 3.148 | 4.017 |
| 2.291 | 2.949 | 2.339 | 2.635 | 2.504 | 2.988 |
| 1.490 | 2.305 | 2.841 | 1.525 | 1.902 | 2.868 |
| 2.134 | 2.443 | 2.748 | 2.800 | 2.472 | 1.556 |
| 3.144 | 3.451 | 2.821 | 2.860 | 3.381 | 1.051 |
| 3.585 | 4.219 | 3.496 | 3.799 | 3.924 | 5.117 |
| 4.101 | 3.804 | 3.268 | 3.510 | 3.595 | 1.878 |
| 3.226 | 2.797 | 3.280 | 3.299 | 3.087 | 4.585 |
| 4.366 | 4.693 | 4.711 | 4.358 | 4.822 | 4.060 |
| 4.439 | 4.426 | 4.106 | 4.139 | 4.490 | 3.646 |
| 1.652 | 1.799 | 2.370 | 3.084 | 3.202 | 4.907 |
| 3.910 | 4.018 | 3.783 | 4.721 | 3.530 | 4.448 |
| 4.729 | 4.979 | 4.641 | 4.059 | 4.415 | 5.036 |
| 3.386 | 2.211 | 2.510 | 2.470 | 3.680 | 3.079 |
| 2.782 | 2.187 | 1.875 | 3.199 | 2.747 | 1.900 |
| 4.958 | 4.820 | 5.233 | 5.895 | 4.003 | 2.512 |
| 2.660 | 2.325 | 2.505 | 3.148 | 2.286 | 2.636 |
| 2.424 | 2.078 | 2.671 | 2.114 | 2.182 | 2.289 |
| 3.786 | 3.289 | 2.426 | 3.797 | 3.422 | 5.035 |
| 3.859 | 3.258 | 3.605 | 1.371 | 2.926 | 2.454 |
| 2.797 | 1.752 | 1.582 | 2.089 | 2.254 | 2.575 |
| 3.605 | 3.478 | 2.803 | 3.170 | 2.577 | 2.360 |
| 1.506 | 1.375 | 1.684 | 2.171 | 1.494 | 4.063 |
| 3.234 | 3.491 | 3.496 | 3.680 | 3.927 | 3.076 |
| 4.832 | 3.573 | 4.081 | 4.700 | 4.016 | 5.442 |
| 5.969 | 7.248 | 6.461 | 6.305 | 6.611 | 8.240 |
| 4.461 | 4.775 | 5.053 | 4.680 | 4.706 | 5.289 |
| 4.072 | 4.048 | 4.370 | 4.219 | 4.145 | 5.431 |
| 1.902 | 2.227 | 2.691 | 1.628 | 2.291 | 3.140 |
| 4.530 | 3.940 | 4.389 | 5.076 | 5.200 | 6.632 |
| 2.942 | 3.112 | 2.452 | 2.879 | 2.995 | 2.505 |
| 3.480 | 2.725 | 2.587 | 2.555 | 3.567 | 3.024 |
| 4.588 | 3.759 | 4.342 | 4.705 | 4.537 | 3.371 |
| 3.735 | 3.184 | 2.919 | 4.034 | 3.830 | 2.592 |
| 3.967 | 3.144 | 4.297 | 4.461 | 3.915 | 2.420 |
| 2.458 | 2.627 | 2.207 | 2.901 | 2.749 | 3.038 |
| 3.445 | 2.851 | 2.438 | 2.470 | 3.595 | 1.214 |
| 2.649 | 2.413 | 1.823 | 2.408 | 2.408 | 3.283 |

|       |       |       |       |       |       |
|-------|-------|-------|-------|-------|-------|
| 3.087 | 2.143 | 3.133 | 2.922 | 2.609 | 2.041 |
| 3.907 | 3.179 | 3.634 | 2.730 | 3.671 | 4.120 |
| 5.257 | 4.895 | 5.301 | 4.437 | 4.533 | 1.921 |
| 2.996 | 2.891 | 3.540 | 3.863 | 3.768 | 5.253 |
| 4.848 | 3.461 | 4.345 | 4.097 | 4.319 | 2.616 |
| 3.245 | 3.007 | 3.244 | 3.071 | 3.109 | 4.185 |
| 3.732 | 4.834 | 4.060 | 3.570 | 3.818 | 2.988 |
| 4.852 | 5.730 | 4.675 | 4.751 | 4.478 | 4.299 |
| 2.048 | 2.959 | 1.714 | 2.515 | 2.756 | 3.942 |
| 2.337 | 2.484 | 2.346 | 2.279 | 3.049 | 2.916 |
| 4.024 | 5.443 | 5.358 | 3.728 | 3.993 | 6.126 |
| 3.501 | 2.525 | 3.085 | 2.541 | 3.193 | 1.701 |
| 4.784 | 4.158 | 3.523 | 3.954 | 4.102 | 4.044 |
| 2.076 | 3.536 | 2.389 | 1.547 | 2.843 | 1.838 |
| 4.753 | 5.059 | 4.675 | 4.941 | 5.159 | 5.453 |
| 3.442 | 2.652 | 3.279 | 4.842 | 3.864 | 3.488 |
| 3.051 | 2.509 | 2.735 | 3.223 | 3.736 | 2.043 |
| 3.432 | 3.570 | 2.934 | 3.085 | 2.817 | 4.191 |
| 3.321 | 2.327 | 2.394 | 3.307 | 2.283 | 1.351 |
| 5.272 | 4.816 | 5.018 | 5.637 | 4.985 | 5.297 |
| 2.143 | 2.475 | 2.112 | 1.928 | 2.231 | 2.695 |
| 2.847 | 4.127 | 3.471 | 3.514 | 3.895 | 3.440 |
| 3.155 | 3.343 | 3.356 | 3.342 | 3.323 | 2.654 |
| 4.460 | 4.570 | 4.417 | 4.859 | 4.952 | 4.580 |
| 2.680 | 1.662 | 2.515 | 2.064 | 2.457 | 2.541 |
| 3.429 | 4.674 | 3.835 | 3.362 | 2.956 | 1.989 |
| 2.245 | 1.986 | 1.895 | 2.326 | 2.851 | 4.019 |
| 4.796 | 4.393 | 4.313 | 5.202 | 4.645 | 4.114 |
| 2.055 | 2.533 | 2.358 | 2.373 | 2.868 | 3.959 |
| 4.386 | 4.024 | 3.633 | 4.989 | 4.534 | 5.115 |
| 3.530 | 2.986 | 3.872 | 4.370 | 3.177 | 5.687 |
| 3.156 | 2.762 | 2.676 | 3.745 | 2.322 | 4.350 |
| 3.132 | 2.525 | 2.490 | 2.709 | 2.495 | 2.791 |
| 4.882 | 3.730 | 4.480 | 4.846 | 4.500 | 5.255 |
| 2.502 | 2.080 | 2.387 | 2.945 | 2.756 | 4.191 |
| 1.889 | 2.355 | 2.620 | 2.336 | 2.379 | 2.633 |
| 5.089 | 4.853 | 5.304 | 4.424 | 4.917 | 2.489 |
| 2.633 | 2.438 | 3.025 | 2.462 | 2.283 | 1.205 |
| 4.188 | 3.170 | 3.305 | 3.973 | 3.532 | 3.149 |
| 4.463 | 5.261 | 4.670 | 4.694 | 4.352 | 3.830 |
| 3.714 | 2.614 | 3.684 | 3.709 | 3.028 | 4.648 |
| 3.803 | 3.107 | 2.867 | 4.200 | 4.014 | 5.035 |
| 2.993 | 2.191 | 2.180 | 2.704 | 2.270 | 2.808 |
| 2.998 | 3.400 | 3.045 | 2.925 | 3.365 | 2.486 |
| 3.607 | 2.777 | 3.625 | 3.178 | 3.274 | 3.754 |
| 3.821 | 4.428 | 4.101 | 3.420 | 3.504 | 3.397 |
| 3.178 | 2.479 | 3.098 | 3.797 | 3.306 | 3.549 |
| 2.085 | 4.574 | 3.306 | 1.725 | 3.201 | 1.621 |
| 3.036 | 5.670 | 4.013 | 2.859 | 4.261 | 2.723 |
| 4.267 | 7.090 | 5.650 | 4.196 | 5.586 | 3.726 |



|       |       |       |       |       |       |
|-------|-------|-------|-------|-------|-------|
| 3.373 | 3.529 | 3.312 | 3.692 | 3.373 | 2.576 |
| 3.850 | 4.231 | 3.914 | 4.662 | 4.534 | 4.823 |
| 3.080 | 2.350 | 2.509 | 2.438 | 1.778 | 1.993 |
| 2.179 | 2.265 | 2.794 | 2.164 | 2.687 | 2.571 |
| 2.973 | 2.012 | 2.804 | 3.132 | 2.094 | 2.111 |
| 4.976 | 3.794 | 4.632 | 4.184 | 4.265 | 4.540 |
| 3.332 | 2.185 | 2.853 | 3.034 | 2.797 | 1.740 |
| 4.576 | 3.287 | 3.310 | 3.730 | 3.350 | 2.202 |
| 4.820 | 2.962 | 2.711 | 3.964 | 3.459 | 1.937 |
| 4.772 | 2.666 | 2.319 | 4.006 | 3.294 | 2.122 |
| 3.508 | 3.339 | 3.373 | 3.877 | 3.060 | 2.432 |
| 3.993 | 4.082 | 4.004 | 4.032 | 4.408 | 4.405 |
| 4.936 | 4.687 | 5.002 | 4.968 | 4.787 | 5.213 |
| 2.752 | 2.973 | 3.545 | 2.631 | 3.412 | 2.462 |
| 3.195 | 3.160 | 3.702 | 2.479 | 2.120 | 2.727 |
| 2.707 | 2.473 | 2.882 | 2.910 | 2.280 | 4.053 |
| 4.713 | 4.894 | 4.877 | 4.772 | 4.434 | 4.667 |
| 2.839 | 3.258 | 3.255 | 2.999 | 3.258 | 3.452 |
| 0.739 | 1.819 | 2.076 | 1.896 | 2.730 | 3.881 |
| 2.477 | 2.588 | 2.651 | 2.525 | 1.925 | 3.609 |
| 2.540 | 2.245 | 1.725 | 2.600 | 2.606 | 2.496 |
| 2.790 | 2.748 | 2.332 | 2.134 | 2.426 | 2.291 |
| 2.269 | 2.788 | 2.079 | 2.855 | 2.391 | 2.095 |
| 1.696 | 1.763 | 1.720 | 1.417 | 1.615 | 3.176 |
| 4.411 | 3.771 | 4.386 | 5.010 | 4.349 | 6.110 |
| 7.209 | 7.586 | 7.364 | 7.417 | 7.695 | 6.883 |
| 2.935 | 3.005 | 2.183 | 2.853 | 2.557 | 5.527 |
| 2.737 | 3.136 | 2.088 | 2.064 | 2.829 | 1.511 |
| 3.402 | 3.056 | 2.850 | 3.348 | 2.951 | 3.254 |
| 2.536 | 2.848 | 3.518 | 3.952 | 3.387 | 2.870 |
| 2.728 | 2.333 | 2.613 | 2.632 | 2.660 | 2.915 |
| 4.064 | 3.281 | 3.607 | 4.423 | 3.688 | 3.776 |
| 2.428 | 2.782 | 2.802 | 2.249 | 2.903 | 2.897 |
| 2.862 | 3.242 | 2.915 | 3.116 | 3.353 | 4.708 |
| 4.499 | 4.759 | 4.819 | 4.695 | 4.536 | 4.122 |
| 2.395 | 1.963 | 2.572 | 1.989 | 2.005 | 2.292 |
| 3.724 | 3.259 | 3.499 | 3.277 | 2.341 | 2.703 |
| 1.780 | 1.749 | 2.003 | 2.178 | 2.612 | 3.994 |
| 2.400 | 2.175 | 2.953 | 2.859 | 2.404 | 1.966 |
| 2.925 | 2.579 | 3.407 | 2.759 | 2.438 | 2.611 |
| 2.476 | 2.457 | 2.258 | 3.195 | 2.987 | 4.646 |
| 5.076 | 4.061 | 4.681 | 4.787 | 4.735 | 5.457 |
| 4.385 | 4.497 | 3.752 | 4.874 | 4.300 | 5.650 |
| 2.813 | 2.392 | 3.520 | 3.230 | 2.011 | 2.406 |
| 2.492 | 2.823 | 2.492 | 2.241 | 2.296 | 2.344 |
| 2.481 | 2.306 | 2.256 | 2.314 | 1.873 | 2.546 |
| 3.265 | 3.477 | 4.148 | 3.129 | 2.878 | 2.493 |
| 4.686 | 2.902 | 3.749 | 4.665 | 3.649 | 4.011 |
| 2.486 | 3.267 | 2.804 | 3.489 | 3.412 | 5.351 |
| 1.903 | 2.733 | 1.696 | 2.551 | 2.262 | 2.570 |

|       |       |       |       |       |       |
|-------|-------|-------|-------|-------|-------|
| 5.207 | 6.247 | 5.443 | 5.224 | 5.278 | 4.643 |
| 2.047 | 2.005 | 1.892 | 2.531 | 1.952 | 3.416 |
| 2.354 | 3.259 | 3.863 | 2.529 | 4.311 | 1.283 |
| 2.055 | 1.789 | 1.903 | 1.994 | 2.403 | 2.124 |
| 3.632 | 3.375 | 3.729 | 3.180 | 3.586 | 2.999 |
| 2.068 | 2.225 | 2.665 | 3.258 | 2.944 | 2.056 |
| 4.552 | 4.113 | 3.981 | 4.528 | 4.795 | 4.212 |
| 2.613 | 2.420 | 2.817 | 2.104 | 2.648 | 3.232 |
| 3.353 | 3.312 | 3.273 | 3.512 | 3.737 | 4.292 |
| 6.948 | 5.830 | 6.399 | 6.829 | 6.360 | 5.606 |
| 2.466 | 2.967 | 3.063 | 2.336 | 3.226 | 1.567 |
| 2.696 | 2.077 | 2.779 | 2.678 | 3.147 | 1.413 |
| 1.635 | 2.325 | 2.374 | 2.061 | 1.913 | 3.129 |
| 4.418 | 3.285 | 2.586 | 3.909 | 3.641 | 2.650 |
| 4.766 | 3.048 | 3.219 | 2.884 | 4.216 | 2.930 |
| 5.786 | 4.993 | 5.342 | 6.621 | 5.165 | 4.113 |
| 3.194 | 1.733 | 3.148 | 2.537 | 3.142 | 0.929 |
| 1.609 | 2.050 | 2.891 | 1.928 | 1.185 | 4.014 |
| 4.058 | 5.443 | 4.814 | 4.238 | 4.963 | 3.490 |
| 4.538 | 5.088 | 4.445 | 4.159 | 4.758 | 3.355 |
| 4.164 | 3.184 | 4.222 | 3.543 | 3.232 | 1.727 |
| 2.613 | 1.889 | 2.404 | 1.839 | 2.819 | 2.910 |
| 5.566 | 4.679 | 4.800 | 5.138 | 5.334 | 4.785 |
| 4.153 | 3.850 | 4.164 | 3.958 | 4.082 | 2.276 |
| 6.240 | 4.115 | 5.345 | 6.311 | 5.688 | 5.834 |
| 2.053 | 2.535 | 2.326 | 3.204 | 2.579 | 2.665 |
| 3.075 | 2.437 | 3.264 | 3.948 | 2.601 | 1.109 |
| 3.400 | 3.988 | 4.006 | 5.245 | 5.034 | 6.746 |
| 1.756 | 1.759 | 1.226 | 1.894 | 1.655 | 2.666 |
| 3.716 | 2.233 | 3.142 | 3.754 | 3.405 | 3.545 |
| 3.680 | 1.922 | 1.983 | 2.983 | 2.316 | 2.699 |
| 3.344 | 2.859 | 2.484 | 3.462 | 3.336 | 2.451 |
| 2.731 | 4.367 | 3.781 | 3.739 | 3.405 | 3.593 |
| 3.101 | 3.456 | 3.385 | 3.280 | 2.629 | 1.295 |
| 5.696 | 5.687 | 5.657 | 5.406 | 5.812 | 6.098 |
| 3.002 | 3.933 | 2.748 | 2.892 | 2.697 | 2.054 |
| 2.528 | 2.203 | 2.539 | 2.011 | 1.982 | 2.457 |
| 2.393 | 1.831 | 1.945 | 2.735 | 2.614 | 6.772 |
| 1.983 | 2.537 | 3.302 | 3.712 | 4.277 | 6.541 |
| 2.940 | 2.989 | 2.028 | 2.766 | 2.545 | 2.983 |
| 4.554 | 2.789 | 3.669 | 4.410 | 3.048 | 4.715 |
| 3.875 | 2.846 | 3.642 | 3.172 | 3.675 | 4.127 |
| 2.549 | 2.799 | 2.893 | 1.969 | 2.743 | 3.786 |
| 3.586 | 4.341 | 3.662 | 3.247 | 3.280 | 2.605 |
| 2.726 | 3.565 | 3.140 | 2.371 | 3.210 | 1.608 |
| 3.849 | 2.781 | 3.394 | 2.735 | 3.610 | 3.600 |
| 3.262 | 3.488 | 3.399 | 2.957 | 3.803 | 3.786 |
| 3.338 | 4.124 | 3.752 | 3.366 | 3.521 | 3.119 |
| 4.376 | 4.498 | 4.773 | 3.817 | 4.709 | 2.718 |
| 1.965 | 2.219 | 2.504 | 2.242 | 2.301 | 1.600 |

|       |       |       |       |       |       |
|-------|-------|-------|-------|-------|-------|
| 4.064 | 5.089 | 4.542 | 4.704 | 4.233 | 4.570 |
| 7.257 | 5.762 | 6.501 | 6.992 | 6.112 | 4.019 |
| 4.702 | 3.109 | 4.240 | 4.516 | 3.888 | 2.532 |
| 2.517 | 2.670 | 2.427 | 3.284 | 2.471 | 2.458 |
| 1.899 | 1.645 | 2.036 | 1.850 | 2.276 | 3.637 |
| 4.219 | 3.156 | 2.617 | 4.641 | 3.226 | 5.161 |
| 2.316 | 2.857 | 2.680 | 2.882 | 2.347 | 4.183 |
| 5.097 | 4.426 | 4.416 | 6.206 | 4.366 | 6.374 |
| 2.739 | 2.043 | 2.332 | 2.996 | 3.059 | 3.162 |
| 3.344 | 3.384 | 3.833 | 4.200 | 4.026 | 5.101 |
| 3.553 | 4.239 | 4.140 | 3.684 | 3.590 | 3.429 |
| 2.502 | 2.546 | 2.228 | 2.489 | 2.651 | 2.828 |
| 4.558 | 4.727 | 3.806 | 3.755 | 3.507 | 2.980 |
| 3.741 | 2.890 | 2.724 | 2.970 | 3.809 | 2.160 |
| 2.174 | 3.571 | 4.401 | 1.782 | 2.017 | 2.306 |
| 5.767 | 6.584 | 6.071 | 5.790 | 6.331 | 5.434 |
| 1.998 | 2.324 | 1.893 | 2.207 | 2.504 | 2.180 |
| 2.548 | 2.574 | 2.224 | 2.957 | 2.619 | 3.340 |
| 2.486 | 2.771 | 2.919 | 2.538 | 2.811 | 2.924 |
| 3.364 | 2.808 | 3.206 | 4.029 | 2.241 | 5.013 |
| 3.849 | 2.268 | 2.534 | 3.074 | 2.345 | 1.876 |
| 2.343 | 2.349 | 2.662 | 3.027 | 2.032 | 1.992 |
| 2.624 | 2.133 | 2.876 | 2.579 | 2.345 | 3.085 |
| 2.589 | 2.127 | 2.395 | 2.756 | 2.733 | 3.973 |
| 3.151 | 2.932 | 2.781 | 3.600 | 3.457 | 3.499 |
| 3.384 | 4.317 | 3.235 | 2.849 | 2.837 | 2.560 |
| 3.095 | 2.756 | 3.483 | 3.276 | 3.710 | 2.729 |
| 3.175 | 2.376 | 2.693 | 3.221 | 3.075 | 3.656 |
| 4.167 | 4.502 | 4.202 | 4.589 | 4.753 | 5.021 |
| 2.080 | 1.905 | 2.165 | 2.080 | 1.883 | 2.585 |
| 6.607 | 6.055 | 6.208 | 7.012 | 6.465 | 6.496 |
| 3.819 | 2.732 | 2.206 | 3.839 | 2.794 | 2.401 |
| 2.324 | 2.801 | 2.600 | 2.738 | 2.899 | 3.420 |
| 4.158 | 4.676 | 4.587 | 3.843 | 4.054 | 3.386 |
| 5.195 | 4.073 | 4.172 | 5.371 | 4.186 | 5.371 |
| 3.786 | 1.667 | 2.906 | 3.217 | 2.376 | 1.659 |
| 4.909 | 5.254 | 4.981 | 5.223 | 5.858 | 5.848 |
| 2.413 | 2.347 | 2.465 | 3.521 | 2.907 | 4.004 |
| 2.606 | 3.457 | 2.522 | 3.337 | 2.897 | 3.739 |
| 3.551 | 3.189 | 4.023 | 2.584 | 3.668 | 3.910 |
| 2.061 | 2.748 | 3.055 | 2.759 | 2.560 | 2.671 |
| 4.448 | 3.169 | 3.647 | 4.003 | 4.075 | 5.384 |
| 2.592 | 2.869 | 2.926 | 2.767 | 2.956 | 2.711 |
| 1.926 | 2.450 | 2.121 | 2.516 | 1.443 | 2.960 |
| 2.243 | 2.617 | 1.810 | 1.654 | 2.099 | 2.355 |
| 4.220 | 4.492 | 4.144 | 4.047 | 4.033 | 4.010 |
| 3.278 | 3.868 | 2.779 | 3.716 | 3.268 | 1.992 |
| 3.884 | 3.559 | 3.560 | 3.928 | 3.173 | 3.100 |
| 2.423 | 4.109 | 3.170 | 2.522 | 3.600 | 1.718 |
| 5.357 | 5.904 | 5.577 | 4.908 | 4.912 | 3.279 |

|       |       |       |       |       |       |
|-------|-------|-------|-------|-------|-------|
| 3.134 | 3.398 | 2.665 | 3.284 | 3.533 | 2.256 |
| 3.680 | 3.621 | 3.016 | 3.229 | 3.538 | 2.487 |
| 2.525 | 2.500 | 1.810 | 2.814 | 2.256 | 2.892 |
| 2.244 | 2.965 | 2.683 | 3.299 | 3.029 | 4.440 |
| 7.723 | 8.130 | 7.900 | 7.819 | 7.287 | 8.357 |
| 3.759 | 3.832 | 3.523 | 3.094 | 3.943 | 2.605 |
| 1.483 | 1.671 | 2.174 | 1.998 | 1.617 | 1.852 |
| 3.968 | 2.971 | 3.223 | 3.724 | 3.115 | 3.551 |
| 2.579 | 4.383 | 3.687 | 2.654 | 3.247 | 3.634 |
| 1.660 | 1.891 | 1.972 | 1.935 | 1.444 | 2.508 |
| 2.597 | 2.702 | 2.005 | 2.350 | 2.479 | 2.413 |
| 2.844 | 2.870 | 2.717 | 3.283 | 3.517 | 3.083 |
| 3.188 | 3.005 | 2.106 | 3.565 | 2.774 | 3.097 |
| 6.587 | 6.652 | 5.966 | 6.903 | 6.335 | 6.970 |
| 2.444 | 3.071 | 3.424 | 4.472 | 3.988 | 5.432 |
| 4.396 | 3.284 | 3.411 | 3.350 | 3.401 | 3.469 |
| 1.579 | 1.393 | 1.301 | 1.287 | 1.514 | 2.087 |
| 3.573 | 3.255 | 3.365 | 3.798 | 3.543 | 1.766 |
| 4.042 | 2.705 | 3.613 | 3.359 | 4.303 | 1.154 |
| 2.117 | 2.329 | 3.007 | 2.407 | 2.687 | 2.743 |
| 4.187 | 4.348 | 4.559 | 4.041 | 4.673 | 4.512 |
| 2.288 | 2.157 | 2.384 | 1.854 | 2.746 | 2.621 |
| 3.155 | 2.973 | 2.772 | 3.550 | 3.251 | 3.084 |
| 2.575 | 2.326 | 2.625 | 2.834 | 2.288 | 3.029 |
| 4.297 | 2.616 | 2.528 | 3.418 | 3.310 | 2.843 |
| 2.826 | 3.084 | 3.179 | 2.821 | 2.880 | 1.051 |
| 2.977 | 3.473 | 3.439 | 3.815 | 3.025 | 1.962 |
| 3.830 | 3.230 | 3.351 | 3.621 | 2.721 | 1.643 |
| 3.044 | 2.377 | 2.840 | 3.668 | 2.482 | 0.864 |
| 6.553 | 6.298 | 6.855 | 6.034 | 6.124 | 3.542 |
| 3.808 | 4.004 | 3.960 | 3.559 | 4.250 | 2.959 |
| 3.962 | 4.718 | 4.578 | 4.285 | 5.097 | 5.936 |
| 3.452 | 3.072 | 3.785 | 4.175 | 3.577 | 3.628 |
| 3.613 | 2.947 | 3.738 | 3.865 | 2.418 | 4.246 |
| 4.154 | 3.633 | 4.323 | 4.354 | 2.091 | 1.044 |
| 1.992 | 2.333 | 2.089 | 1.876 | 1.828 | 2.383 |
| 2.408 | 2.133 | 2.767 | 3.230 | 2.234 | 2.828 |
| 2.768 | 2.238 | 2.715 | 3.338 | 2.749 | 2.900 |
| 3.797 | 4.266 | 4.086 | 3.937 | 4.425 | 4.828 |
| 3.886 | 2.679 | 2.834 | 1.900 | 1.884 | 2.330 |
| 3.802 | 3.862 | 4.049 | 4.140 | 4.600 | 2.701 |
| 4.880 | 5.475 | 5.071 | 4.842 | 4.769 | 3.694 |
| 3.211 | 3.234 | 3.652 | 2.193 | 2.433 | 1.082 |
| 3.418 | 2.047 | 3.496 | 4.018 | 2.880 | 2.008 |
| 4.766 | 5.184 | 4.897 | 4.438 | 4.410 | 5.193 |
| 3.539 | 2.937 | 3.390 | 3.793 | 3.728 | 4.432 |
| 2.722 | 1.886 | 2.602 | 2.718 | 2.338 | 2.989 |
| 7.434 | 6.333 | 6.544 | 7.221 | 6.873 | 7.777 |
| 3.587 | 3.133 | 3.651 | 4.059 | 3.679 | 3.245 |
| 2.750 | 2.859 | 2.445 | 3.048 | 2.754 | 2.052 |

|       |       |       |       |       |       |
|-------|-------|-------|-------|-------|-------|
| 3.049 | 1.999 | 2.405 | 3.008 | 2.402 | 2.853 |
| 2.951 | 3.553 | 3.171 | 2.535 | 3.385 | 4.324 |
| 3.123 | 2.938 | 2.219 | 3.182 | 2.924 | 3.073 |
| 3.372 | 3.402 | 2.813 | 3.308 | 2.830 | 4.237 |
| 3.469 | 2.653 | 2.655 | 2.996 | 2.421 | 1.989 |
| 3.575 | 3.864 | 3.873 | 3.861 | 3.121 | 4.049 |
| 3.514 | 3.623 | 3.582 | 3.996 | 3.957 | 4.406 |
| 3.003 | 3.081 | 2.537 | 2.616 | 3.208 | 2.428 |
| 7.841 | 7.418 | 7.088 | 7.936 | 7.729 | 7.788 |
| 2.202 | 2.452 | 2.301 | 3.762 | 3.297 | 3.293 |
| 2.430 | 4.171 | 3.689 | 2.486 | 3.211 | 0.861 |
| 4.850 | 4.788 | 5.085 | 5.042 | 4.239 | 2.090 |
| 7.271 | 6.367 | 6.875 | 7.266 | 6.985 | 8.041 |
| 2.029 | 2.023 | 2.279 | 2.400 | 1.991 | 2.840 |
| 3.917 | 4.237 | 3.007 | 3.769 | 4.120 | 5.122 |
| 3.472 | 3.516 | 3.832 | 3.935 | 4.555 | 6.266 |
| 3.187 | 3.508 | 3.079 | 2.912 | 2.894 | 2.441 |
| 1.321 | 1.662 | 1.462 | 1.230 | 1.373 | 1.850 |
| 3.063 | 2.915 | 3.544 | 3.187 | 3.619 | 4.499 |
| 3.193 | 2.945 | 2.574 | 2.395 | 2.803 | 2.329 |
| 5.645 | 5.995 | 5.819 | 5.767 | 6.122 | 2.949 |
| 3.853 | 3.429 | 4.186 | 4.943 | 4.438 | 4.066 |
| 7.651 | 7.107 | 7.486 | 7.626 | 6.823 | 8.416 |
| 2.319 | 2.598 | 2.167 | 2.511 | 2.894 | 3.359 |
| 3.130 | 1.688 | 3.389 | 2.567 | 1.680 | 1.586 |
| 2.074 | 3.005 | 2.389 | 1.786 | 2.775 | 2.406 |
| 3.639 | 3.648 | 3.868 | 3.552 | 3.759 | 2.217 |
| 2.829 | 2.638 | 4.090 | 3.255 | 2.792 | 3.313 |
| 2.714 | 2.291 | 3.134 | 2.230 | 2.293 | 2.512 |
| 2.892 | 3.094 | 3.810 | 2.649 | 2.741 | 3.036 |
| 2.447 | 2.523 | 2.688 | 2.307 | 2.507 | 2.358 |
| 2.528 | 2.485 | 3.165 | 2.802 | 3.370 | 2.638 |
| 1.566 | 2.008 | 2.161 | 1.923 | 2.291 | 3.882 |
| 3.893 | 3.777 | 2.355 | 3.733 | 3.717 | 2.808 |
| 3.126 | 3.237 | 3.289 | 3.526 | 2.885 | 2.824 |
| 3.663 | 3.605 | 3.926 | 3.060 | 3.902 | 3.082 |
| 2.562 | 2.078 | 2.546 | 3.005 | 2.124 | 3.143 |
| 3.472 | 3.290 | 2.596 | 3.319 | 2.985 | 3.302 |
| 3.765 | 2.888 | 2.784 | 3.521 | 3.041 | 2.665 |
| 2.762 | 2.032 | 3.435 | 2.752 | 2.679 | 3.016 |
| 4.620 | 3.948 | 4.886 | 4.720 | 4.864 | 3.162 |
| 2.621 | 4.841 | 3.126 | 2.226 | 3.022 | 3.859 |
| 4.392 | 4.188 | 4.200 | 4.637 | 4.472 | 4.645 |
| 5.834 | 5.408 | 5.689 | 5.825 | 5.873 | 5.017 |
| 7.097 | 7.279 | 7.364 | 7.711 | 7.859 | 5.792 |
| 2.471 | 2.323 | 2.539 | 2.035 | 2.738 | 1.886 |
| 9.325 | 9.581 | 9.352 | 9.491 | 9.280 | 9.892 |
| 3.327 | 3.707 | 3.380 | 3.209 | 3.272 | 3.645 |
| 2.829 | 2.682 | 2.047 | 2.568 | 3.090 | 3.022 |
| 6.716 | 7.280 | 7.023 | 6.573 | 6.356 | 6.758 |

|        |        |        |        |        |        |
|--------|--------|--------|--------|--------|--------|
| 8.057  | 8.006  | 8.030  | 7.911  | 7.807  | 8.573  |
| 3.333  | 3.435  | 2.968  | 4.222  | 3.795  | 4.548  |
| 5.840  | 5.568  | 5.461  | 6.284  | 5.757  | 7.030  |
| 4.771  | 4.718  | 5.310  | 5.359  | 4.960  | 5.132  |
| 6.348  | 6.562  | 6.231  | 6.100  | 5.856  | 5.204  |
| 4.774  | 4.982  | 4.983  | 4.765  | 5.309  | 3.195  |
| 2.935  | 3.208  | 3.663  | 3.444  | 2.859  | 3.565  |
| 3.489  | 3.637  | 3.633  | 3.410  | 3.520  | 4.307  |
| 2.435  | 2.719  | 2.369  | 2.372  | 2.429  | 2.905  |
| 5.350  | 5.304  | 5.397  | 5.152  | 5.209  | 4.003  |
| 4.781  | 4.970  | 5.105  | 4.910  | 4.998  | 4.235  |
| 2.884  | 3.671  | 3.573  | 3.986  | 3.913  | 3.139  |
| 3.738  | 4.242  | 4.620  | 4.477  | 4.108  | 3.065  |
| 3.980  | 3.475  | 4.174  | 4.050  | 3.836  | 1.191  |
| 4.845  | 4.884  | 4.978  | 4.920  | 4.512  | 5.404  |
| 3.246  | 2.623  | 2.919  | 3.366  | 2.970  | 2.629  |
| 7.566  | 7.351  | 7.397  | 7.337  | 7.223  | 8.015  |
| 2.769  | 3.406  | 2.506  | 2.127  | 2.606  | 3.528  |
| 8.878  | 9.492  | 9.103  | 8.683  | 8.729  | 9.395  |
| 10.272 | 10.717 | 10.585 | 10.249 | 10.325 | 10.619 |
| 5.078  | 4.860  | 4.753  | 5.222  | 5.340  | 4.993  |
| 3.157  | 3.102  | 3.663  | 3.903  | 4.221  | 3.019  |
| 10.131 | 9.791  | 10.071 | 9.825  | 9.749  | 10.361 |
| 8.011  | 7.643  | 8.275  | 7.601  | 8.020  | 8.648  |
| 4.698  | 3.689  | 3.808  | 3.947  | 4.156  | 4.865  |
| 5.541  | 5.615  | 6.216  | 5.555  | 5.307  | 4.984  |
| 6.820  | 6.783  | 6.745  | 6.904  | 6.576  | 6.004  |
| 4.606  | 5.052  | 4.555  | 4.843  | 4.556  | 3.858  |
| 1.681  | 2.581  | 1.679  | 2.188  | 1.839  | 1.273  |
| 2.089  | 1.803  | 1.498  | 2.137  | 2.030  | 2.440  |
| 4.119  | 4.678  | 4.124  | 4.702  | 4.518  | 4.189  |
| 2.014  | 1.994  | 2.143  | 1.941  | 2.373  | 3.580  |
| 5.425  | 5.768  | 5.552  | 5.599  | 5.902  | 5.284  |
| 6.259  | 6.046  | 5.986  | 5.528  | 6.202  | 6.508  |
| 5.971  | 6.053  | 6.195  | 5.517  | 5.651  | 7.120  |
| 4.498  | 4.412  | 4.399  | 4.179  | 4.727  | 5.137  |
| 2.534  | 2.454  | 2.831  | 3.493  | 3.492  | 2.569  |
| 6.013  | 6.730  | 6.111  | 6.068  | 6.215  | 5.804  |
| 6.526  | 6.454  | 6.525  | 6.278  | 6.365  | 5.889  |
| 2.609  | 2.811  | 2.965  | 2.938  | 3.207  | 4.649  |
| 4.694  | 4.622  | 4.972  | 5.171  | 5.695  | 4.504  |
| 3.169  | 3.248  | 2.812  | 3.905  | 3.752  | 4.021  |
| 5.418  | 4.956  | 5.207  | 4.922  | 4.941  | 4.744  |
| 5.204  | 3.769  | 1.484  | 0.961  | 3.044  | 4.380  |
| 2.595  | 3.192  | 2.554  | 3.162  | 3.265  | 2.494  |
| 5.743  | 6.131  | 5.675  | 5.834  | 5.933  | 5.553  |
| 4.032  | 3.457  | 3.796  | 3.934  | 3.707  | 3.835  |
| 5.800  | 5.852  | 5.979  | 6.068  | 5.935  | 5.594  |
| 2.381  | 2.284  | 2.879  | 2.651  | 2.589  | 2.396  |
| 5.732  | 5.483  | 5.826  | 5.678  | 5.391  | 2.677  |

|       |       |       |       |       |        |
|-------|-------|-------|-------|-------|--------|
| 4.571 | 4.422 | 4.877 | 4.106 | 4.568 | 1.699  |
| 5.578 | 5.686 | 5.778 | 5.695 | 5.913 | 5.418  |
| 7.875 | 7.814 | 7.701 | 7.925 | 7.836 | 7.137  |
| 4.528 | 4.796 | 4.812 | 4.999 | 5.433 | 6.483  |
| 3.168 | 3.483 | 2.474 | 2.783 | 2.166 | 1.338  |
| 8.430 | 8.593 | 8.482 | 8.443 | 8.288 | 7.139  |
| 5.191 | 5.441 | 5.532 | 5.105 | 4.986 | 3.673  |
| 9.731 | 9.678 | 9.733 | 9.767 | 9.564 | 9.050  |
| 4.319 | 5.010 | 4.343 | 4.331 | 4.127 | 3.794  |
| 4.298 | 3.627 | 3.476 | 3.884 | 3.642 | 2.877  |
| 6.246 | 6.267 | 6.214 | 5.452 | 6.003 | 3.684  |
| 3.337 | 2.662 | 3.385 | 2.889 | 3.289 | 1.707  |
| 2.359 | 2.818 | 3.278 | 2.459 | 2.913 | 1.996  |
| 2.245 | 2.704 | 3.010 | 2.670 | 3.038 | 3.737  |
| 3.082 | 3.726 | 3.333 | 2.921 | 3.261 | 2.329  |
| 5.026 | 5.040 | 4.954 | 5.437 | 5.443 | 6.681  |
| 6.128 | 6.442 | 6.029 | 6.079 | 6.128 | 5.260  |
| 9.330 | 8.974 | 9.014 | 8.979 | 8.995 | 7.159  |
| 5.050 | 5.487 | 5.401 | 4.976 | 5.284 | 3.437  |
| 2.423 | 2.256 | 1.987 | 1.878 | 1.734 | 3.334  |
| 5.561 | 5.182 | 5.473 | 5.043 | 5.210 | 3.914  |
| 2.677 | 2.246 | 2.326 | 2.160 | 2.472 | 3.256  |
| 4.583 | 4.041 | 4.544 | 4.403 | 4.393 | 3.561  |
| 7.566 | 7.305 | 7.336 | 7.180 | 7.429 | 6.420  |
| 6.078 | 6.572 | 6.244 | 6.106 | 6.391 | 5.431  |
| 2.827 | 4.452 | 4.233 | 3.916 | 4.509 | 2.420  |
| 5.077 | 6.031 | 6.450 | 6.216 | 6.149 | 0.899  |
| 3.821 | 3.507 | 3.685 | 4.022 | 3.800 | 4.658  |
| 8.024 | 7.857 | 7.921 | 8.136 | 7.988 | 5.018  |
| 5.764 | 6.168 | 5.869 | 6.077 | 5.885 | 7.077  |
| 3.312 | 3.428 | 3.596 | 3.474 | 3.679 | 3.916  |
| 2.468 | 2.556 | 2.195 | 2.016 | 2.328 | 3.450  |
| 3.464 | 3.257 | 3.845 | 3.092 | 3.685 | 3.603  |
| 5.567 | 3.023 | 2.388 | 5.107 | 2.086 | 1.840  |
| 4.057 | 4.382 | 4.507 | 3.682 | 3.492 | 4.156  |
| 2.031 | 2.593 | 3.100 | 1.871 | 2.613 | 2.208  |
| 4.406 | 4.084 | 4.546 | 3.951 | 3.992 | 4.744  |
| 5.320 | 5.342 | 4.415 | 4.881 | 4.181 | 3.344  |
| 5.353 | 5.316 | 5.252 | 4.764 | 3.816 | 3.225  |
| 8.470 | 8.330 | 8.765 | 8.756 | 9.025 | 10.974 |
| 3.658 | 3.252 | 3.095 | 3.997 | 3.583 | 4.323  |
| 4.394 | 4.376 | 4.373 | 3.970 | 4.658 | 5.746  |
| 7.838 | 7.957 | 7.894 | 8.063 | 7.993 | 6.953  |
| 3.636 | 3.910 | 4.157 | 3.768 | 3.796 | 3.117  |
| 5.329 | 5.011 | 5.419 | 5.316 | 5.305 | 6.865  |
| 5.489 | 5.556 | 5.363 | 5.482 | 5.796 | 6.629  |
| 3.721 | 3.637 | 2.516 | 4.006 | 3.375 | 4.171  |
| 4.827 | 4.257 | 4.542 | 4.933 | 4.591 | 5.258  |
| 3.083 | 3.661 | 2.909 | 2.486 | 2.647 | 3.751  |
| 6.366 | 6.336 | 6.405 | 6.691 | 6.504 | 6.008  |

|       |       |       |       |       |        |
|-------|-------|-------|-------|-------|--------|
| 3.245 | 2.977 | 3.942 | 2.761 | 3.624 | 3.409  |
| 4.291 | 4.382 | 4.241 | 4.171 | 4.479 | 5.739  |
| 3.837 | 3.267 | 3.912 | 3.213 | 3.670 | 3.466  |
| 3.254 | 3.412 | 3.395 | 3.456 | 3.749 | 3.833  |
| 3.931 | 4.105 | 4.836 | 4.488 | 4.410 | 5.514  |
| 7.129 | 7.070 | 7.500 | 7.366 | 7.102 | 7.538  |
| 3.010 | 1.995 | 3.006 | 2.596 | 2.814 | 3.162  |
| 2.827 | 2.875 | 2.874 | 3.350 | 2.793 | 3.178  |
| 2.603 | 2.533 | 3.216 | 2.677 | 3.210 | 2.746  |
| 7.697 | 7.291 | 7.210 | 7.731 | 7.584 | 8.673  |
| 2.742 | 3.423 | 4.062 | 3.031 | 2.993 | 4.266  |
| 8.251 | 7.897 | 7.352 | 7.260 | 7.405 | 7.214  |
| 6.735 | 6.619 | 6.687 | 6.702 | 6.770 | 5.436  |
| 8.160 | 7.837 | 8.117 | 8.122 | 8.061 | 5.626  |
| 3.649 | 4.106 | 2.690 | 3.273 | 3.006 | 2.622  |
| 4.991 | 5.478 | 5.084 | 4.415 | 5.173 | 3.564  |
| 8.053 | 8.103 | 8.120 | 8.093 | 8.040 | 7.389  |
| 4.315 | 4.362 | 4.164 | 4.049 | 4.231 | 4.289  |
| 2.729 | 2.888 | 2.183 | 3.461 | 3.728 | 7.712  |
| 5.469 | 5.510 | 5.315 | 4.751 | 4.433 | 5.242  |
| 7.108 | 7.526 | 7.227 | 7.164 | 7.119 | 5.340  |
| 8.240 | 8.656 | 8.402 | 8.430 | 8.244 | 7.493  |
| 5.274 | 5.441 | 5.231 | 4.873 | 5.048 | 6.481  |
| 3.308 | 3.767 | 3.568 | 3.419 | 3.720 | 4.683  |
| 8.816 | 9.043 | 8.967 | 8.867 | 8.817 | 7.499  |
| 6.648 | 7.604 | 7.555 | 6.396 | 7.100 | 7.471  |
| 2.267 | 1.549 | 1.328 | 1.779 | 1.681 | 1.588  |
| 7.970 | 7.452 | 7.466 | 8.171 | 7.993 | 8.453  |
| 6.230 | 6.051 | 6.262 | 5.756 | 4.970 | 5.765  |
| 1.649 | 2.588 | 2.782 | 2.771 | 1.811 | 2.620  |
| 5.288 | 5.281 | 4.987 | 5.403 | 4.783 | 5.073  |
| 3.618 | 3.497 | 3.323 | 4.066 | 4.443 | 4.052  |
| 5.303 | 4.890 | 5.641 | 4.919 | 4.700 | 3.576  |
| 5.568 | 5.286 | 5.099 | 5.550 | 5.321 | 4.546  |
| 5.009 | 4.616 | 4.083 | 4.624 | 4.239 | 4.274  |
| 5.907 | 5.274 | 5.350 | 5.947 | 6.337 | 6.200  |
| 6.401 | 7.241 | 6.136 | 7.983 | 5.533 | 6.898  |
| 8.768 | 7.196 | 7.379 | 8.460 | 7.488 | 5.931  |
| 7.018 | 7.153 | 6.782 | 7.109 | 6.723 | 6.499  |
| 7.364 | 6.895 | 6.999 | 7.369 | 6.581 | 6.950  |
| 4.155 | 4.505 | 3.633 | 4.450 | 3.797 | 4.416  |
| 1.957 | 2.596 | 2.609 | 2.394 | 2.937 | 2.969  |
| 6.604 | 6.752 | 6.993 | 7.110 | 7.014 | 8.008  |
| 9.245 | 9.654 | 9.284 | 9.133 | 9.792 | 11.331 |
| 6.918 | 6.890 | 7.097 | 6.883 | 7.249 | 7.014  |
| 5.313 | 6.158 | 5.685 | 5.669 | 5.489 | 5.214  |
| 8.676 | 8.940 | 8.735 | 8.801 | 8.898 | 8.093  |
| 5.740 | 5.719 | 5.550 | 5.754 | 5.845 | 4.769  |
| 2.082 | 3.705 | 4.438 | 2.117 | 3.252 | 3.397  |
| 4.081 | 5.903 | 5.493 | 4.215 | 3.488 | 5.908  |



|       |       |       |       |       |       |
|-------|-------|-------|-------|-------|-------|
| 3.876 | 4.363 | 3.384 | 3.965 | 4.006 | 3.182 |
| 3.204 | 2.629 | 2.616 | 2.546 | 2.747 | 2.102 |
| 2.107 | 1.521 | 1.449 | 2.389 | 2.836 | 2.510 |
| 8.159 | 8.577 | 8.398 | 8.390 | 8.574 | 6.313 |
| 7.800 | 7.749 | 7.609 | 7.796 | 8.022 | 6.046 |
| 8.543 | 8.095 | 8.572 | 8.484 | 8.473 | 5.716 |
| 7.925 | 7.475 | 7.955 | 7.991 | 8.041 | 6.140 |
| 7.135 | 6.731 | 7.307 | 7.092 | 6.750 | 6.972 |
| 7.630 | 7.435 | 7.854 | 7.294 | 7.387 | 5.455 |
| 5.842 | 5.869 | 5.456 | 5.361 | 5.707 | 4.098 |
| 3.203 | 3.270 | 3.672 | 3.343 | 2.921 | 2.766 |
| 8.694 | 8.901 | 8.526 | 8.752 | 8.701 | 6.416 |
| 7.414 | 7.561 | 7.411 | 7.441 | 7.277 | 5.445 |
| 3.442 | 3.783 | 3.976 | 3.728 | 2.542 | 3.663 |
| 3.420 | 3.061 | 3.769 | 4.429 | 3.298 | 4.027 |
| 2.787 | 2.002 | 3.244 | 2.304 | 2.167 | 3.124 |
| 4.879 | 5.464 | 5.343 | 4.843 | 5.053 | 3.073 |
| 3.446 | 3.277 | 3.450 | 3.130 | 2.910 | 2.547 |
| 3.138 | 2.621 | 2.472 | 2.313 | 2.836 | 2.915 |
| 3.415 | 2.530 | 2.763 | 2.859 | 3.407 | 4.414 |
| 3.446 | 2.202 | 2.258 | 3.152 | 2.085 | 2.239 |
| 6.897 | 6.743 | 7.242 | 7.138 | 7.118 | 6.072 |
| 8.308 | 6.641 | 6.223 | 8.177 | 7.916 | 8.983 |
| 5.184 | 5.229 | 4.638 | 4.790 | 4.754 | 4.592 |
| 4.486 | 5.021 | 4.407 | 4.087 | 4.433 | 3.122 |
| 3.554 | 3.899 | 3.531 | 3.531 | 3.581 | 4.213 |
| 4.033 | 3.693 | 4.784 | 3.251 | 2.839 | 4.227 |
| 5.429 | 4.806 | 4.303 | 5.720 | 5.509 | 5.163 |
| 3.895 | 4.055 | 4.594 | 5.257 | 4.074 | 5.544 |
| 1.037 | 4.121 | 4.819 | 5.536 | 5.483 | 5.457 |
| 3.231 | 3.854 | 4.677 | 5.026 | 4.009 | 4.526 |
| 2.705 | 3.274 | 3.736 | 4.583 | 3.218 | 4.733 |
| 5.128 | 4.951 | 4.973 | 5.121 | 5.437 | 4.724 |
| 2.930 | 2.051 | 2.930 | 3.423 | 2.273 | 1.453 |
| 5.876 | 4.926 | 5.515 | 5.195 | 5.509 | 4.925 |
| 3.536 | 3.776 | 3.945 | 3.867 | 3.659 | 1.722 |
| 4.058 | 3.065 | 3.342 | 2.918 | 3.580 | 3.283 |
| 4.533 | 4.372 | 4.522 | 4.313 | 4.667 | 5.617 |
| 4.049 | 4.331 | 4.271 | 4.081 | 4.004 | 4.851 |
| 5.810 | 5.926 | 6.647 | 6.166 | 6.190 | 7.126 |
| 2.978 | 2.747 | 3.916 | 3.990 | 3.950 | 4.614 |
| 5.705 | 5.713 | 5.588 | 6.129 | 6.408 | 6.893 |
| 2.254 | 2.132 | 3.075 | 2.688 | 2.694 | 3.533 |
| 4.244 | 3.403 | 3.806 | 3.389 | 4.023 | 3.180 |
| 2.772 | 2.013 | 2.463 | 2.365 | 2.248 | 3.577 |
| 3.538 | 1.493 | 2.521 | 2.391 | 1.602 | 3.288 |
| 7.000 | 7.406 | 6.941 | 7.074 | 6.892 | 6.282 |
| 5.304 | 5.215 | 5.375 | 5.080 | 5.420 | 4.207 |
| 4.117 | 3.975 | 4.569 | 3.126 | 4.064 | 3.223 |
| 8.513 | 8.650 | 8.773 | 8.510 | 8.803 | 7.630 |

|        |        |        |        |        |       |
|--------|--------|--------|--------|--------|-------|
| 5.477  | 5.136  | 5.639  | 5.291  | 5.866  | 3.785 |
| 2.890  | 5.383  | 1.138  | 3.343  | 1.710  | 2.043 |
| 5.012  | 4.284  | 4.224  | 4.790  | 4.691  | 5.184 |
| 4.318  | 4.012  | 4.359  | 4.110  | 3.448  | 5.631 |
| 4.052  | 4.017  | 4.219  | 3.307  | 3.862  | 5.842 |
| 5.300  | 5.593  | 5.818  | 5.950  | 5.693  | 4.848 |
| 5.092  | 5.496  | 5.272  | 5.755  | 6.408  | 7.833 |
| 2.611  | 2.750  | 2.730  | 2.015  | 3.288  | 2.932 |
| 6.466  | 5.997  | 5.868  | 6.087  | 5.990  | 6.303 |
| 4.169  | 4.314  | 4.087  | 4.211  | 4.292  | 5.349 |
| 4.438  | 5.321  | 5.035  | 5.931  | 5.589  | 4.240 |
| 3.498  | 2.987  | 3.286  | 2.356  | 3.508  | 2.219 |
| 3.209  | 4.339  | 3.500  | 3.024  | 3.332  | 3.343 |
| 3.766  | 3.455  | 3.849  | 3.525  | 4.224  | 4.308 |
| 4.460  | 4.705  | 4.305  | 4.412  | 4.704  | 5.329 |
| 4.835  | 4.670  | 4.758  | 4.848  | 5.123  | 6.659 |
| 5.699  | 5.156  | 5.309  | 5.319  | 5.443  | 4.780 |
| 3.306  | 4.043  | 3.461  | 2.969  | 4.023  | 3.319 |
| 6.068  | 5.879  | 5.977  | 5.905  | 6.135  | 6.690 |
| 4.339  | 4.439  | 4.801  | 4.221  | 4.933  | 3.322 |
| 5.434  | 4.958  | 4.970  | 5.376  | 5.663  | 6.742 |
| 6.489  | 6.617  | 6.691  | 6.368  | 6.711  | 4.418 |
| 2.805  | 3.171  | 3.448  | 3.375  | 2.700  | 1.836 |
| 7.165  | 7.180  | 6.866  | 7.367  | 7.203  | 7.445 |
| 7.317  | 7.613  | 7.467  | 7.391  | 7.357  | 7.066 |
| 5.622  | 6.113  | 5.982  | 5.610  | 6.055  | 4.947 |
| 6.369  | 6.755  | 6.447  | 6.258  | 6.254  | 7.175 |
| 3.290  | 3.285  | 3.675  | 3.954  | 3.644  | 5.571 |
| 5.056  | 5.689  | 5.581  | 5.572  | 5.564  | 6.407 |
| 4.819  | 5.173  | 4.746  | 4.901  | 5.477  | 6.623 |
| 6.579  | 6.085  | 6.744  | 6.725  | 6.622  | 5.887 |
| 2.502  | 2.920  | 2.468  | 1.867  | 2.350  | 2.590 |
| 10.587 | 10.486 | 10.330 | 10.571 | 10.421 | 8.734 |
| 6.235  | 6.728  | 6.733  | 7.097  | 7.096  | 7.692 |
| 6.718  | 5.697  | 6.523  | 6.354  | 6.296  | 4.906 |
| 5.503  | 5.853  | 5.567  | 5.607  | 5.606  | 5.156 |
| 6.416  | 6.692  | 6.756  | 6.490  | 6.402  | 6.546 |
| 5.198  | 5.786  | 5.251  | 5.763  | 5.315  | 5.187 |
| 4.884  | 4.477  | 4.833  | 5.073  | 4.943  | 4.358 |
| 2.009  | 2.620  | 2.279  | 1.779  | 1.539  | 1.895 |
| 3.143  | 2.650  | 2.724  | 2.705  | 2.720  | 3.227 |
| 5.976  | 6.269  | 6.339  | 6.400  | 6.563  | 7.457 |
| 5.350  | 4.923  | 4.979  | 5.314  | 5.281  | 4.316 |
| 1.859  | 2.368  | 2.909  | 1.408  | 1.910  | 1.983 |
| 4.083  | 5.406  | 5.232  | 3.227  | 3.930  | 4.136 |
| 2.108  | 2.230  | 2.396  | 1.837  | 2.168  | 2.204 |
| 5.070  | 5.512  | 5.361  | 4.689  | 5.222  | 5.536 |
| 4.659  | 5.216  | 4.900  | 4.587  | 4.263  | 5.726 |
| 3.569  | 2.899  | 3.003  | 2.987  | 3.617  | 3.573 |
| 5.957  | 6.219  | 5.903  | 5.680  | 5.984  | 6.007 |

|       |       |       |       |       |       |
|-------|-------|-------|-------|-------|-------|
| 3.337 | 2.967 | 2.859 | 2.746 | 4.025 | 2.643 |
| 3.945 | 1.724 | 2.519 | 3.003 | 4.007 | 2.293 |
| 2.987 | 3.303 | 2.137 | 2.019 | 2.840 | 3.393 |
| 7.299 | 7.782 | 8.298 | 7.787 | 7.709 | 4.237 |
| 6.029 | 6.292 | 5.801 | 5.204 | 5.596 | 5.436 |
| 4.972 | 4.322 | 4.952 | 4.101 | 4.434 | 4.802 |
| 9.321 | 9.775 | 9.762 | 9.621 | 9.531 | 8.338 |
| 1.654 | 1.780 | 2.176 | 1.674 | 1.865 | 4.256 |
| 3.242 | 4.403 | 4.013 | 3.950 | 4.286 | 3.314 |
| 2.915 | 2.779 | 3.287 | 3.179 | 3.719 | 4.237 |
| 6.437 | 7.137 | 6.735 | 6.359 | 6.674 | 3.990 |
| 7.532 | 7.293 | 7.302 | 7.275 | 6.963 | 6.640 |
| 4.991 | 4.891 | 4.620 | 3.959 | 4.990 | 3.714 |
| 5.196 | 5.072 | 5.072 | 5.582 | 5.289 | 3.789 |
| 5.136 | 5.198 | 5.245 | 5.796 | 5.186 | 4.923 |
| 4.774 | 4.722 | 4.797 | 4.556 | 4.591 | 3.642 |
| 7.460 | 7.023 | 7.210 | 7.185 | 7.371 | 6.630 |
| 7.619 | 7.757 | 7.610 | 7.558 | 7.793 | 6.787 |
| 5.903 | 5.749 | 6.127 | 5.786 | 5.742 | 6.956 |
| 5.006 | 5.050 | 4.627 | 2.978 | 3.571 | 3.791 |
| 3.031 | 3.400 | 3.960 | 3.298 | 3.407 | 4.125 |
| 3.894 | 4.476 | 4.237 | 4.273 | 4.261 | 5.050 |
| 5.518 | 3.368 | 3.922 | 5.573 | 4.901 | 5.255 |
| 2.310 | 2.370 | 2.091 | 2.017 | 2.046 | 3.002 |
| 2.307 | 2.597 | 2.783 | 2.921 | 1.862 | 2.170 |
| 6.527 | 6.572 | 6.085 | 6.194 | 6.249 | 7.002 |
| 4.381 | 4.764 | 4.547 | 4.562 | 4.965 | 2.729 |
| 7.246 | 6.973 | 7.231 | 7.275 | 7.180 | 6.416 |
| 5.252 | 5.488 | 5.133 | 5.809 | 5.659 | 6.733 |
| 2.506 | 3.579 | 2.896 | 3.560 | 4.025 | 5.009 |
| 4.999 | 4.909 | 5.336 | 4.975 | 4.700 | 4.008 |
| 5.990 | 4.585 | 5.058 | 4.765 | 4.673 | 4.548 |
| 3.721 | 3.072 | 2.553 | 2.723 | 3.242 | 3.587 |
| 5.765 | 5.519 | 5.599 | 5.328 | 5.371 | 4.656 |
| 5.741 | 5.813 | 5.501 | 5.766 | 5.404 | 5.179 |
| 7.355 | 7.280 | 7.146 | 6.935 | 7.449 | 6.242 |
| 8.457 | 8.938 | 8.900 | 8.598 | 8.876 | 7.344 |
| 2.761 | 3.287 | 3.528 | 2.940 | 2.509 | 2.383 |
| 3.776 | 3.867 | 3.879 | 2.913 | 3.758 | 2.851 |
| 4.083 | 4.724 | 4.612 | 4.359 | 4.647 | 5.474 |
| 9.359 | 9.411 | 9.379 | 9.384 | 9.345 | 8.520 |
| 4.621 | 4.527 | 4.677 | 4.256 | 4.531 | 4.962 |
| 1.823 | 2.620 | 2.497 | 2.566 | 2.520 | 2.741 |
| 2.410 | 3.081 | 3.136 | 2.575 | 2.892 | 2.951 |
| 3.759 | 3.589 | 3.829 | 4.063 | 4.366 | 4.880 |
| 3.758 | 3.258 | 2.392 | 3.697 | 3.837 | 4.567 |
| 3.895 | 3.662 | 3.895 | 3.895 | 4.120 | 4.384 |
| 3.125 | 3.682 | 2.912 | 2.841 | 2.909 | 2.937 |
| 8.498 | 8.597 | 8.413 | 8.642 | 8.542 | 6.467 |
| 5.150 | 4.684 | 4.996 | 4.655 | 5.059 | 5.129 |

|       |       |       |       |       |       |
|-------|-------|-------|-------|-------|-------|
| 2.942 | 2.700 | 3.048 | 2.965 | 2.425 | 1.559 |
| 2.595 | 2.349 | 2.682 | 2.232 | 2.285 | 3.515 |
| 3.153 | 3.868 | 3.257 | 4.607 | 4.616 | 6.001 |
| 5.876 | 5.869 | 6.091 | 6.044 | 6.129 | 3.493 |
| 3.539 | 3.147 | 2.185 | 3.531 | 3.177 | 1.886 |
| 2.448 | 2.127 | 2.089 | 1.699 | 1.795 | 2.182 |
| 7.072 | 6.500 | 6.697 | 6.733 | 6.535 | 4.306 |
| 4.850 | 4.770 | 4.138 | 4.558 | 4.678 | 4.766 |
| 5.738 | 5.702 | 5.396 | 5.105 | 5.465 | 5.595 |
| 8.490 | 8.401 | 8.566 | 8.469 | 8.326 | 5.409 |
| 4.365 | 4.426 | 4.491 | 5.256 | 4.829 | 6.000 |
| 3.472 | 3.346 | 3.576 | 4.083 | 3.399 | 2.728 |
| 2.561 | 2.764 | 3.530 | 3.029 | 3.194 | 4.084 |
| 2.923 | 2.708 | 2.264 | 2.621 | 2.144 | 1.920 |
| 3.280 | 3.717 | 3.823 | 3.398 | 3.506 | 3.042 |
| 5.855 | 5.516 | 5.081 | 5.172 | 5.663 | 8.099 |
| 5.268 | 4.456 | 5.098 | 4.928 | 5.015 | 4.019 |
| 6.010 | 5.506 | 5.939 | 5.777 | 5.655 | 3.930 |
| 4.351 | 4.668 | 4.695 | 4.372 | 4.560 | 5.133 |
| 3.799 | 4.102 | 3.779 | 3.757 | 3.943 | 4.254 |
| 3.714 | 4.221 | 3.958 | 3.600 | 4.300 | 5.501 |
| 3.801 | 3.780 | 4.201 | 3.830 | 3.616 | 2.446 |
| 3.431 | 3.597 | 3.198 | 3.650 | 3.227 | 4.249 |
| 4.231 | 4.021 | 3.847 | 4.284 | 4.372 | 5.817 |
| 5.886 | 5.845 | 6.022 | 5.605 | 5.887 | 4.759 |
| 4.210 | 4.521 | 4.625 | 3.619 | 4.773 | 2.536 |
| 5.434 | 4.966 | 5.165 | 5.173 | 4.995 | 4.984 |
| 5.814 | 5.554 | 5.578 | 5.411 | 5.598 | 6.400 |
| 4.048 | 4.918 | 4.761 | 3.922 | 4.362 | 4.737 |
| 3.262 | 2.298 | 2.335 | 2.184 | 2.588 | 2.644 |
| 2.861 | 3.538 | 2.637 | 2.265 | 2.618 | 3.365 |
| 2.497 | 2.859 | 3.767 | 2.748 | 3.110 | 3.501 |
| 2.805 | 3.029 | 3.463 | 3.638 | 3.339 | 5.014 |
| 4.019 | 4.034 | 3.873 | 3.006 | 3.957 | 3.955 |
| 5.144 | 5.030 | 4.448 | 4.751 | 5.175 | 3.145 |
| 3.607 | 3.226 | 2.841 | 4.066 | 3.985 | 4.651 |
| 6.856 | 6.658 | 6.739 | 6.695 | 6.693 | 6.094 |
| 7.646 | 7.019 | 7.233 | 7.400 | 7.215 | 6.417 |
| 8.577 | 8.221 | 8.281 | 8.596 | 8.214 | 7.531 |
| 3.396 | 3.152 | 2.996 | 3.161 | 3.279 | 3.453 |
| 4.682 | 4.495 | 4.678 | 4.723 | 5.014 | 5.991 |
| 4.483 | 4.505 | 4.351 | 4.607 | 4.566 | 3.627 |
| 1.976 | 2.796 | 2.191 | 2.812 | 2.885 | 1.764 |
| 5.757 | 5.610 | 5.959 | 5.730 | 5.825 | 4.737 |
| 3.196 | 3.822 | 3.274 | 3.023 | 3.427 | 2.136 |
| 2.450 | 2.112 | 1.706 | 1.845 | 1.930 | 2.129 |
| 5.841 | 5.728 | 6.082 | 5.707 | 5.732 | 6.868 |
| 4.153 | 4.577 | 4.494 | 3.736 | 4.185 | 4.454 |
| 6.681 | 6.774 | 7.037 | 7.289 | 7.331 | 8.531 |
| 4.138 | 4.124 | 4.755 | 3.730 | 3.416 | 3.235 |

|        |        |        |        |        |        |
|--------|--------|--------|--------|--------|--------|
| 5.851  | 6.498  | 6.208  | 6.342  | 6.057  | 5.332  |
| 3.275  | 3.604  | 3.731  | 3.710  | 3.303  | 3.459  |
| 3.736  | 3.237  | 3.718  | 4.127  | 3.155  | 3.185  |
| 3.748  | 4.131  | 3.512  | 2.703  | 3.653  | 4.036  |
| 5.772  | 5.797  | 5.394  | 5.348  | 5.734  | 6.582  |
| 8.094  | 8.012  | 8.001  | 7.997  | 8.035  | 5.987  |
| 3.978  | 2.997  | 3.278  | 3.301  | 3.663  | 2.749  |
| 2.896  | 2.907  | 2.955  | 3.129  | 3.016  | 3.607  |
| 4.815  | 4.145  | 3.776  | 4.650  | 5.231  | 5.956  |
| 6.257  | 3.010  | 3.343  | 4.113  | 5.482  | 2.028  |
| 5.444  | 5.292  | 4.192  | 4.933  | 5.575  | 3.550  |
| 9.011  | 7.089  | 6.807  | 9.026  | 7.667  | 10.399 |
| 6.382  | 5.676  | 6.036  | 6.383  | 5.993  | 5.723  |
| 3.072  | 3.106  | 3.706  | 2.891  | 3.081  | 3.802  |
| 5.186  | 4.799  | 5.080  | 4.730  | 5.126  | 4.099  |
| 3.942  | 2.219  | 2.129  | 2.178  | 3.259  | 1.656  |
| 5.083  | 5.279  | 5.245  | 4.797  | 5.189  | 4.037  |
| 4.369  | 4.320  | 5.009  | 4.101  | 4.408  | 4.236  |
| 4.106  | 4.150  | 4.060  | 3.453  | 4.257  | 5.207  |
| 4.261  | 4.261  | 4.913  | 5.096  | 4.585  | 4.516  |
| 5.160  | 4.964  | 4.817  | 5.132  | 5.170  | 4.371  |
| 4.888  | 4.272  | 4.419  | 5.283  | 4.747  | 6.338  |
| 5.981  | 6.579  | 6.115  | 6.059  | 6.060  | 5.182  |
| 5.123  | 6.831  | 6.084  | 5.767  | 5.734  | 7.400  |
| 10.350 | 10.227 | 10.180 | 9.860  | 10.021 | 4.830  |
| 2.417  | 2.857  | 3.194  | 2.849  | 3.099  | 2.026  |
| 2.735  | 2.982  | 2.935  | 2.302  | 2.724  | 3.019  |
| 5.500  | 5.918  | 5.720  | 5.739  | 5.834  | 5.149  |
| 6.808  | 7.097  | 7.048  | 6.852  | 6.843  | 4.741  |
| 10.362 | 10.598 | 9.966  | 10.469 | 10.262 | 9.450  |
| 3.781  | 4.033  | 3.815  | 3.215  | 3.797  | 4.571  |
| 4.264  | 3.701  | 3.617  | 3.275  | 3.322  | 2.539  |
| 2.853  | 2.126  | 2.261  | 3.127  | 2.503  | 1.315  |
| 4.888  | 5.179  | 4.889  | 5.426  | 5.456  | 6.301  |
| 3.825  | 3.203  | 2.635  | 2.783  | 3.323  | 4.001  |
| 2.842  | 3.199  | 3.102  | 2.794  | 3.646  | 3.483  |
| 4.324  | 2.656  | 3.335  | 3.366  | 3.500  | 4.054  |
| 3.429  | 3.948  | 3.086  | 3.672  | 2.455  | 2.338  |
| 2.330  | 2.508  | 3.069  | 2.943  | 3.040  | 2.844  |
| 9.224  | 10.079 | 9.660  | 9.917  | 9.915  | 9.526  |
| 5.882  | 5.497  | 5.778  | 5.344  | 5.868  | 6.515  |
| 3.751  | 3.099  | 3.298  | 3.415  | 3.347  | 5.339  |
| 4.936  | 4.205  | 5.165  | 4.921  | 5.101  | 5.927  |
| 7.400  | 7.687  | 7.376  | 7.571  | 7.688  | 5.959  |
| 4.381  | 4.679  | 4.590  | 4.858  | 4.793  | 6.620  |
| 5.833  | 6.252  | 6.409  | 5.999  | 6.270  | 5.025  |
| 3.230  | 4.306  | 4.066  | 4.048  | 3.844  | 3.416  |
| 6.982  | 6.700  | 6.725  | 6.869  | 6.620  | 6.586  |
| 4.321  | 4.663  | 5.089  | 4.276  | 4.680  | 3.579  |
| 5.611  | 5.743  | 5.930  | 5.254  | 5.692  | 3.818  |

|       |       |       |       |       |       |
|-------|-------|-------|-------|-------|-------|
| 8.566 | 8.379 | 8.387 | 8.250 | 8.384 | 7.199 |
| 7.446 | 7.614 | 7.639 | 7.519 | 7.669 | 7.115 |
| 5.799 | 4.906 | 4.988 | 5.459 | 5.625 | 6.714 |
| 4.661 | 5.245 | 5.112 | 4.423 | 4.098 | 4.318 |
| 6.043 | 6.281 | 6.294 | 6.315 | 6.349 | 5.992 |
| 5.939 | 6.129 | 5.794 | 5.631 | 5.777 | 5.863 |
| 8.739 | 9.344 | 8.942 | 8.942 | 9.054 | 8.206 |
| 5.901 | 6.688 | 6.170 | 6.281 | 6.366 | 5.173 |
| 6.379 | 6.630 | 6.589 | 6.460 | 6.539 | 6.055 |
| 6.551 | 6.869 | 6.697 | 6.715 | 6.951 | 6.151 |
| 3.613 | 3.609 | 2.942 | 3.917 | 4.174 | 4.637 |
| 3.776 | 4.064 | 3.801 | 5.024 | 4.431 | 2.018 |
| 5.889 | 5.877 | 6.877 | 6.067 | 6.323 | 2.528 |
| 4.479 | 3.461 | 4.510 | 3.920 | 4.312 | 2.698 |
| 5.322 | 5.173 | 4.791 | 5.352 | 5.492 | 6.218 |
| 3.702 | 4.884 | 4.337 | 3.915 | 4.468 | 1.566 |
| 2.099 | 2.556 | 2.396 | 2.203 | 2.269 | 4.383 |
| 5.253 | 5.411 | 5.239 | 4.945 | 5.231 | 4.569 |
| 4.154 | 4.367 | 4.189 | 3.608 | 4.013 | 4.870 |
| 4.471 | 4.233 | 4.734 | 3.931 | 3.932 | 5.069 |
| 5.541 | 4.114 | 5.111 | 4.811 | 4.770 | 4.463 |
| 6.466 | 6.373 | 6.246 | 6.015 | 6.044 | 4.725 |
| 7.643 | 7.809 | 7.732 | 7.389 | 7.530 | 4.737 |
| 4.818 | 5.610 | 5.174 | 4.963 | 5.263 | 3.551 |
| 3.640 | 3.865 | 3.687 | 3.938 | 3.812 | 4.535 |
| 3.672 | 3.776 | 3.603 | 3.266 | 3.641 | 4.082 |
| 4.779 | 4.603 | 4.568 | 4.610 | 4.463 | 2.862 |
| 5.423 | 6.124 | 5.905 | 5.632 | 5.663 | 4.858 |
| 7.682 | 8.064 | 7.823 | 7.792 | 7.703 | 7.108 |
| 6.491 | 6.522 | 6.357 | 6.074 | 6.259 | 5.911 |
| 5.507 | 5.745 | 5.627 | 6.125 | 6.372 | 7.508 |
| 4.425 | 5.019 | 5.322 | 5.174 | 5.366 | 3.501 |
| 6.341 | 6.696 | 6.149 | 6.312 | 6.448 | 5.782 |
| 4.402 | 4.453 | 4.459 | 4.801 | 4.894 | 5.766 |
| 6.910 | 6.883 | 6.747 | 6.943 | 6.851 | 6.358 |
| 4.455 | 4.745 | 4.511 | 4.583 | 4.428 | 5.543 |
| 3.843 | 4.804 | 4.490 | 4.722 | 4.974 | 6.456 |
| 5.933 | 4.923 | 5.455 | 4.963 | 5.315 | 4.818 |
| 8.083 | 8.602 | 8.412 | 8.320 | 8.672 | 6.603 |
| 5.981 | 5.993 | 5.927 | 5.971 | 5.821 | 4.526 |
| 2.817 | 3.103 | 2.647 | 2.572 | 3.220 | 2.811 |
| 5.268 | 5.028 | 5.370 | 5.674 | 5.276 | 4.859 |
| 5.808 | 6.465 | 5.721 | 5.692 | 5.891 | 5.074 |
| 2.448 | 1.856 | 2.984 | 2.253 | 2.002 | 2.952 |
| 5.361 | 5.518 | 5.334 | 5.272 | 5.600 | 4.862 |
| 8.835 | 9.027 | 8.625 | 9.229 | 8.902 | 9.640 |
| 4.088 | 4.165 | 4.701 | 4.398 | 4.720 | 5.015 |
| 4.587 | 4.381 | 3.907 | 4.872 | 3.786 | 2.972 |
| 5.881 | 6.355 | 6.759 | 5.926 | 6.795 | 7.127 |
| 3.242 | 2.847 | 2.787 | 3.970 | 3.558 | 3.047 |

|       |       |       |       |       |       |
|-------|-------|-------|-------|-------|-------|
| 5.112 | 4.767 | 4.840 | 4.996 | 4.507 | 4.643 |
| 2.191 | 3.412 | 3.138 | 3.223 | 2.946 | 2.383 |
| 6.283 | 6.458 | 6.944 | 6.346 | 6.604 | 4.878 |
| 5.598 | 4.904 | 4.978 | 5.417 | 5.401 | 6.652 |
| 6.260 | 6.340 | 6.128 | 6.184 | 5.785 | 5.439 |
| 5.929 | 5.761 | 5.804 | 4.909 | 5.743 | 4.903 |
| 3.743 | 4.096 | 4.192 | 3.074 | 4.089 | 2.959 |
| 4.582 | 4.650 | 4.553 | 4.313 | 4.147 | 5.034 |
| 3.627 | 3.526 | 3.638 | 3.039 | 2.909 | 4.737 |
| 6.519 | 6.529 | 6.463 | 6.512 | 6.294 | 5.744 |
| 3.250 | 3.477 | 3.283 | 2.889 | 3.499 | 4.262 |
| 7.527 | 7.878 | 7.755 | 8.169 | 8.258 | 9.875 |
| 7.500 | 7.334 | 7.196 | 7.423 | 7.549 | 8.955 |
| 2.879 | 4.067 | 4.224 | 2.985 | 3.196 | 4.433 |
| 5.082 | 5.021 | 4.901 | 5.151 | 5.030 | 3.067 |
| 3.041 | 3.648 | 4.151 | 4.166 | 4.464 | 5.806 |
| 6.053 | 5.765 | 5.830 | 5.828 | 5.940 | 4.206 |
| 4.476 | 4.001 | 4.870 | 4.035 | 4.314 | 5.387 |
| 4.421 | 2.750 | 3.846 | 4.164 | 4.529 | 2.932 |
| 1.690 | 2.123 | 1.612 | 1.536 | 1.558 | 3.512 |
| 8.443 | 8.048 | 8.095 | 8.421 | 8.121 | 5.249 |
| 6.212 | 6.314 | 6.413 | 6.269 | 6.212 | 5.332 |
| 2.948 | 2.344 | 2.529 | 2.419 | 2.622 | 3.520 |
| 5.788 | 5.525 | 5.557 | 5.448 | 5.610 | 4.921 |
| 8.796 | 8.740 | 8.321 | 8.599 | 8.626 | 9.544 |
| 3.585 | 4.351 | 3.516 | 4.300 | 4.300 | 4.241 |
| 6.728 | 6.559 | 6.569 | 6.456 | 6.520 | 5.710 |
| 4.426 | 4.890 | 4.750 | 4.802 | 4.725 | 3.983 |
| 4.013 | 4.134 | 4.009 | 3.564 | 3.122 | 3.821 |
| 2.702 | 2.946 | 1.973 | 2.360 | 2.134 | 2.639 |
| 1.844 | 2.902 | 3.358 | 2.535 | 2.171 | 2.719 |
| 4.895 | 4.998 | 4.197 | 5.518 | 5.577 | 7.583 |
| 3.202 | 2.425 | 2.129 | 1.853 | 3.077 | 2.052 |
| 3.801 | 3.853 | 5.096 | 3.987 | 3.811 | 3.811 |
| 1.797 | 1.766 | 2.211 | 1.550 | 1.920 | 3.469 |
| 8.988 | 9.025 | 8.762 | 9.093 | 9.313 | 8.695 |
| 6.578 | 6.184 | 6.661 | 5.956 | 6.157 | 6.776 |
| 3.780 | 3.040 | 3.322 | 3.772 | 3.590 | 3.010 |
| 6.730 | 7.301 | 6.995 | 6.931 | 7.085 | 4.981 |
| 8.308 | 8.490 | 8.480 | 8.335 | 8.738 | 6.273 |
| 4.760 | 3.315 | 2.932 | 3.616 | 3.939 | 2.153 |
| 1.504 | 1.506 | 1.477 | 1.772 | 1.538 | 5.196 |
| 4.990 | 6.797 | 5.120 | 5.433 | 6.015 | 5.379 |
| 6.316 | 5.779 | 5.808 | 6.044 | 5.918 | 2.810 |
| 4.510 | 4.810 | 4.683 | 4.865 | 5.090 | 7.200 |
| 4.610 | 4.528 | 4.529 | 4.714 | 4.983 | 3.846 |
| 7.482 | 7.280 | 7.169 | 7.713 | 7.957 | 8.336 |
| 6.156 | 6.628 | 6.745 | 6.356 | 6.461 | 5.768 |
| 6.294 | 5.845 | 5.801 | 5.521 | 5.292 | 5.385 |
| 2.271 | 2.447 | 1.798 | 2.986 | 2.086 | 1.652 |

|       |        |        |       |        |       |
|-------|--------|--------|-------|--------|-------|
| 7.167 | 7.433  | 8.218  | 7.358 | 7.640  | 6.943 |
| 5.016 | 5.082  | 4.871  | 4.988 | 4.803  | 4.265 |
| 1.592 | 1.926  | 1.831  | 1.907 | 1.553  | 2.678 |
| 4.725 | 4.736  | 4.760  | 4.879 | 5.344  | 3.053 |
| 5.901 | 5.655  | 5.920  | 6.352 | 6.107  | 4.505 |
| 8.123 | 7.735  | 8.109  | 7.996 | 7.919  | 4.874 |
| 3.534 | 3.407  | 3.859  | 3.403 | 3.689  | 3.748 |
| 4.017 | 4.143  | 4.073  | 4.018 | 3.874  | 4.494 |
| 5.661 | 5.854  | 5.769  | 5.425 | 5.648  | 4.877 |
| 2.384 | 2.780  | 2.361  | 2.411 | 2.955  | 1.746 |
| 7.270 | 7.788  | 7.702  | 6.935 | 7.342  | 7.568 |
| 3.728 | 4.364  | 3.732  | 3.691 | 3.650  | 2.361 |
| 9.932 | 10.426 | 10.037 | 9.816 | 10.151 | 8.518 |
| 6.742 | 6.776  | 6.770  | 6.383 | 6.460  | 5.697 |
| 7.239 | 7.395  | 7.315  | 7.005 | 7.247  | 6.036 |
| 5.471 | 5.446  | 5.407  | 5.371 | 5.912  | 3.745 |
| 5.971 | 6.316  | 6.359  | 6.148 | 6.175  | 7.487 |
| 7.092 | 7.081  | 7.070  | 6.739 | 7.018  | 5.842 |
| 5.335 | 5.446  | 5.340  | 5.749 | 5.916  | 6.832 |
| 6.547 | 6.708  | 6.973  | 6.708 | 6.686  | 5.228 |
| 4.166 | 3.912  | 3.651  | 3.877 | 3.636  | 3.537 |
| 4.594 | 4.658  | 4.669  | 4.388 | 4.546  | 5.567 |
| 5.716 | 5.573  | 5.540  | 5.716 | 5.548  | 6.738 |
| 4.787 | 4.395  | 4.740  | 4.422 | 4.727  | 2.988 |
| 4.068 | 4.649  | 4.294  | 4.286 | 4.402  | 1.233 |
| 2.248 | 1.517  | 1.482  | 2.487 | 1.946  | 3.020 |
| 3.514 | 3.647  | 3.275  | 3.262 | 3.932  | 4.026 |
| 1.817 | 1.822  | 2.220  | 1.965 | 1.376  | 2.916 |
| 5.216 | 6.212  | 5.980  | 5.773 | 6.134  | 5.707 |
| 6.712 | 6.604  | 6.831  | 6.381 | 6.580  | 4.934 |
| 6.803 | 6.374  | 6.857  | 6.781 | 6.738  | 5.687 |
| 4.778 | 2.957  | 3.269  | 4.337 | 3.450  | 3.788 |
| 6.088 | 6.115  | 6.081  | 5.559 | 6.120  | 5.695 |
| 7.763 | 7.258  | 7.669  | 7.623 | 7.523  | 6.888 |
| 6.643 | 6.817  | 6.809  | 6.469 | 6.864  | 4.306 |
| 5.361 | 5.672  | 5.654  | 5.111 | 5.496  | 2.345 |
| 6.786 | 6.460  | 6.357  | 6.466 | 6.307  | 5.396 |
| 6.150 | 5.317  | 5.487  | 5.665 | 5.408  | 5.001 |
| 2.699 | 5.209  | 4.998  | 2.807 | 3.524  | 2.109 |
| 4.416 | 3.062  | 2.760  | 4.016 | 3.720  | 1.987 |
| 6.094 | 6.732  | 6.371  | 6.471 | 6.373  | 5.693 |
| 6.939 | 7.094  | 6.733  | 7.749 | 6.740  | 8.540 |
| 1.778 | 1.921  | 0.934  | 1.893 | 1.478  | 2.221 |
| 5.965 | 5.477  | 5.091  | 5.841 | 5.790  | 7.445 |
| 4.233 | 3.327  | 3.249  | 3.504 | 2.384  | 3.006 |
| 6.999 | 7.376  | 7.155  | 7.055 | 7.111  | 6.174 |
| 3.694 | 3.561  | 3.436  | 4.110 | 2.883  | 3.879 |
| 3.873 | 3.534  | 4.032  | 3.951 | 4.105  | 5.124 |
| 7.640 | 7.918  | 7.683  | 7.790 | 7.730  | 7.205 |
| 5.745 | 6.552  | 6.054  | 6.078 | 6.453  | 5.177 |



|        |        |        |        |        |        |
|--------|--------|--------|--------|--------|--------|
| 2.142  | 2.444  | 2.893  | 2.868  | 3.000  | 2.005  |
| 4.013  | 3.019  | 3.017  | 3.677  | 3.705  | 2.605  |
| 3.364  | 4.218  | 4.158  | 3.943  | 3.892  | 3.587  |
| 2.472  | 1.301  | 2.162  | 2.183  | 1.494  | 3.671  |
| 2.958  | 3.021  | 2.449  | 3.025  | 3.001  | 4.314  |
| 4.908  | 5.295  | 5.637  | 5.319  | 5.618  | 4.522  |
| 3.935  | 3.829  | 4.299  | 4.087  | 4.507  | 3.381  |
| 4.222  | 3.984  | 4.310  | 4.009  | 4.051  | 5.064  |
| 4.757  | 4.304  | 3.935  | 5.072  | 4.470  | 6.011  |
| 5.903  | 5.468  | 5.332  | 5.730  | 5.140  | 7.027  |
| 4.305  | 4.711  | 4.473  | 4.233  | 4.435  | 3.627  |
| 7.534  | 8.090  | 7.768  | 7.685  | 7.918  | 6.270  |
| 5.180  | 5.148  | 5.061  | 5.188  | 4.801  | 5.020  |
| 5.587  | 4.330  | 4.921  | 5.503  | 4.755  | 5.430  |
| 3.024  | 2.786  | 2.847  | 2.848  | 2.937  | 2.315  |
| 5.191  | 4.472  | 4.553  | 4.463  | 4.337  | 4.038  |
| 5.296  | 5.308  | 5.329  | 5.194  | 5.237  | 4.064  |
| 7.006  | 6.999  | 6.789  | 6.650  | 6.907  | 7.629  |
| 11.503 | 11.661 | 11.714 | 11.554 | 11.830 | 10.112 |
| 3.051  | 2.917  | 2.937  | 2.676  | 3.444  | 1.796  |
| 4.468  | 4.527  | 4.677  | 4.628  | 4.412  | 3.669  |
| 8.812  | 8.731  | 8.720  | 8.833  | 8.866  | 7.067  |
| 4.481  | 4.807  | 4.866  | 4.043  | 4.830  | 5.341  |
| 4.231  | 3.921  | 4.484  | 3.548  | 4.419  | 4.737  |
| 5.005  | 4.985  | 5.487  | 3.793  | 5.368  | 5.859  |
| 3.556  | 3.698  | 4.329  | 3.862  | 4.254  | 4.879  |
| 3.549  | 3.317  | 3.871  | 2.971  | 2.623  | 2.702  |
| 1.282  | 2.373  | 3.828  | 2.943  | 0.981  | 3.461  |
| 3.780  | 4.150  | 4.325  | 3.836  | 3.049  | 3.935  |
| 2.441  | 1.861  | 3.106  | 2.558  | 2.353  | 2.672  |
| 1.516  | 0.754  | 2.322  | 1.155  | 1.439  | 2.182  |
| 7.443  | 7.870  | 7.705  | 7.494  | 7.527  | 6.769  |
| 3.819  | 3.235  | 3.794  | 3.934  | 4.056  | 2.526  |
| 8.386  | 8.521  | 8.659  | 8.362  | 8.587  | 6.181  |
| 6.336  | 6.436  | 6.196  | 6.398  | 6.424  | 6.417  |
| 4.241  | 4.257  | 3.966  | 3.886  | 4.010  | 4.280  |
| 4.244  | 3.710  | 3.918  | 4.283  | 3.769  | 3.894  |
| 4.325  | 3.809  | 3.509  | 3.580  | 3.675  | 4.095  |
| 3.667  | 3.599  | 3.489  | 3.471  | 3.532  | 3.808  |
| 2.305  | 1.605  | 3.135  | 2.994  | 2.772  | 3.517  |
| 6.314  | 5.400  | 5.712  | 6.100  | 6.150  | 5.648  |
| 3.918  | 4.595  | 3.984  | 3.830  | 3.895  | 4.253  |
| 8.932  | 8.726  | 8.812  | 8.577  | 8.798  | 7.882  |
| 5.387  | 5.918  | 5.225  | 5.687  | 4.924  | 6.149  |
| 8.494  | 9.567  | 8.118  | 9.916  | 8.341  | 9.131  |
| 3.152  | 2.340  | 3.472  | 3.677  | 2.057  | 3.741  |
| 4.540  | 5.235  | 4.046  | 4.734  | 4.267  | 4.827  |
| 5.665  | 5.917  | 5.102  | 5.713  | 4.545  | 5.465  |
| 6.367  | 5.984  | 6.295  | 6.327  | 5.524  | 6.365  |
| 3.488  | 3.440  | 3.881  | 3.651  | 3.884  | 3.881  |

|        |        |        |        |        |        |
|--------|--------|--------|--------|--------|--------|
| 3.634  | 2.979  | 3.181  | 4.121  | 3.706  | 4.537  |
| 6.470  | 6.237  | 6.004  | 6.409  | 5.876  | 6.052  |
| 9.012  | 8.765  | 8.396  | 8.514  | 7.905  | 8.186  |
| 7.971  | 7.545  | 7.306  | 8.106  | 9.273  | 8.565  |
| 4.773  | 5.247  | 5.016  | 4.905  | 5.229  | 4.633  |
| 3.523  | 3.743  | 3.595  | 3.916  | 3.643  | 4.083  |
| 3.818  | 3.346  | 3.166  | 3.523  | 2.931  | 3.380  |
| 1.340  | 2.113  | 2.191  | 2.315  | 4.360  | 1.681  |
| 1.682  | 1.508  | 1.663  | 2.770  | 1.596  | 2.165  |
| 7.717  | 7.342  | 6.747  | 8.126  | 6.784  | 8.388  |
| 8.675  | 9.125  | 8.367  | 8.941  | 8.490  | 9.142  |
| 3.646  | 4.340  | 3.730  | 4.142  | 3.331  | 3.658  |
| 2.742  | 3.727  | 2.690  | 3.242  | 2.156  | 3.252  |
| 1.898  | 2.313  | 2.473  | 1.954  | 2.271  | 3.012  |
| 6.785  | 7.502  | 6.773  | 7.671  | 7.422  | 8.015  |
| 4.258  | 3.235  | 3.099  | 4.585  | 3.993  | 4.794  |
| 2.817  | 1.657  | 1.531  | 2.912  | 2.649  | 2.937  |
| 7.283  | 8.192  | 7.685  | 8.264  | 7.073  | 9.773  |
| 7.322  | 6.455  | 5.893  | 6.866  | 6.341  | 7.673  |
| 7.371  | 5.775  | 6.092  | 6.984  | 5.723  | 6.733  |
| 10.053 | 9.847  | 9.921  | 10.138 | 10.077 | 10.813 |
| 10.852 | 10.381 | 10.645 | 10.662 | 10.188 | 10.973 |
| 8.196  | 7.335  | 7.388  | 8.491  | 7.335  | 8.649  |
| 4.032  | 4.076  | 4.374  | 4.208  | 4.141  | 4.840  |
| 8.179  | 8.572  | 7.953  | 8.907  | 8.096  | 8.804  |
| 6.250  | 6.521  | 6.388  | 6.643  | 6.202  | 5.933  |
| 4.756  | 5.271  | 4.505  | 4.869  | 4.507  | 5.399  |
| 3.513  | 2.839  | 3.916  | 2.979  | 3.437  | 4.559  |
| 8.197  | 7.927  | 7.368  | 8.210  | 7.040  | 8.924  |
| 5.656  | 5.866  | 6.081  | 6.060  | 5.746  | 6.667  |
| 6.603  | 6.505  | 6.525  | 6.364  | 6.460  | 6.354  |
| 3.762  | 2.889  | 3.017  | 3.405  | 2.591  | 3.971  |
| 9.606  | 9.052  | 8.901  | 9.465  | 9.202  | 9.159  |
| 2.371  | 2.789  | 1.994  | 3.043  | 2.471  | 3.820  |
| 3.297  | 2.091  | 2.632  | 2.298  | 2.832  | 2.710  |
| 3.431  | 2.392  | 2.089  | 3.195  | 2.174  | 4.250  |
| 3.662  | 3.252  | 3.749  | 3.734  | 3.765  | 3.750  |
| 5.020  | 4.853  | 4.587  | 5.246  | 4.714  | 4.871  |
| 7.260  | 7.906  | 7.235  | 7.131  | 6.952  | 6.945  |
| 5.310  | 5.359  | 4.526  | 4.674  | 4.633  | 5.674  |
| 5.622  | 5.981  | 5.546  | 6.038  | 5.066  | 5.667  |
| 6.759  | 6.586  | 6.046  | 6.494  | 5.263  | 6.092  |
| 3.550  | 2.531  | 2.843  | 3.153  | 3.281  | 3.353  |
| 6.115  | 3.966  | 4.805  | 5.574  | 5.051  | 5.555  |
| 9.474  | 6.172  | 8.396  | 9.236  | 7.911  | 9.381  |
| 8.051  | 7.728  | 7.535  | 7.970  | 7.819  | 8.557  |
| 4.948  | 4.822  | 4.379  | 5.091  | 4.588  | 6.065  |
| 3.684  | 3.611  | 3.663  | 3.912  | 3.763  | 3.847  |
| 3.017  | 1.862  | 3.040  | 2.253  | 2.818  | 3.520  |
| 5.896  | 6.124  | 6.355  | 6.141  | 6.180  | 7.267  |

|        |        |        |        |        |        |
|--------|--------|--------|--------|--------|--------|
| 5.454  | 6.039  | 5.488  | 5.537  | 5.625  | 5.812  |
| 2.898  | 3.505  | 3.518  | 4.116  | 3.544  | 3.563  |
| 5.942  | 5.102  | 5.483  | 6.063  | 5.258  | 6.277  |
| 5.101  | 4.735  | 5.070  | 4.619  | 4.809  | 4.905  |
| 5.632  | 5.674  | 5.459  | 5.405  | 5.124  | 5.439  |
| 7.786  | 7.825  | 7.520  | 7.376  | 7.116  | 8.011  |
| 8.404  | 7.909  | 8.560  | 7.804  | 10.104 | 9.912  |
| 2.709  | 3.052  | 3.254  | 3.326  | 2.990  | 3.202  |
| 5.298  | 5.413  | 5.564  | 5.928  | 4.940  | 6.311  |
| 7.203  | 6.587  | 7.141  | 7.688  | 6.263  | 6.009  |
| 5.412  | 5.025  | 4.826  | 5.095  | 4.928  | 4.804  |
| 5.991  | 5.288  | 5.349  | 5.962  | 5.305  | 4.195  |
| 5.237  | 4.514  | 5.001  | 5.536  | 4.437  | 3.639  |
| 6.632  | 5.993  | 6.509  | 6.641  | 6.095  | 5.727  |
| 3.496  | 3.084  | 3.089  | 2.942  | 2.293  | 1.413  |
| 5.443  | 4.156  | 5.128  | 4.567  | 4.360  | 3.036  |
| 5.342  | 3.754  | 5.412  | 5.218  | 4.134  | 3.621  |
| 9.364  | 8.512  | 9.439  | 9.283  | 8.643  | 7.535  |
| 3.879  | 2.369  | 1.458  | 3.349  | 2.376  | 1.199  |
| 5.308  | 3.322  | 4.268  | 4.998  | 3.901  | 2.414  |
| 10.054 | 9.542  | 9.761  | 9.856  | 9.498  | 8.009  |
| 4.529  | 3.725  | 4.107  | 4.528  | 3.114  | 3.016  |
| 5.703  | 5.541  | 6.064  | 6.012  | 5.267  | 4.967  |
| 6.148  | 5.428  | 6.293  | 6.322  | 5.414  | 4.535  |
| 5.562  | 4.277  | 4.782  | 5.764  | 5.062  | 4.469  |
| 5.453  | 4.699  | 5.096  | 5.062  | 5.230  | 4.045  |
| 4.567  | 4.691  | 4.757  | 5.198  | 4.780  | 3.704  |
| 5.195  | 1.766  | 1.933  | 5.126  | 4.464  | 2.989  |
| 6.872  | 6.166  | 6.807  | 6.733  | 5.975  | 4.937  |
| 6.141  | 5.632  | 6.434  | 5.584  | 5.146  | 3.890  |
| 4.375  | 3.031  | 3.660  | 3.626  | 2.303  | 0.840  |
| 5.663  | 4.994  | 5.890  | 5.375  | 4.837  | 2.257  |
| 5.934  | 4.950  | 6.045  | 5.914  | 5.344  | 3.034  |
| 5.006  | 3.990  | 4.386  | 5.070  | 4.254  | 4.856  |
| 7.948  | 7.260  | 7.953  | 7.572  | 7.282  | 5.445  |
| 9.895  | 9.241  | 9.979  | 9.781  | 9.194  | 8.145  |
| 3.852  | 2.123  | 3.579  | 4.560  | 2.385  | 4.132  |
| 4.158  | 3.276  | 4.020  | 4.014  | 3.424  | 2.976  |
| 2.704  | 3.278  | 2.773  | 3.647  | 2.561  | 2.698  |
| 1.788  | 3.909  | 4.930  | 2.771  | 2.096  | 1.279  |
| 4.568  | 2.618  | 2.794  | 4.294  | 3.084  | 3.387  |
| 6.074  | 5.373  | 6.227  | 6.100  | 5.206  | 3.857  |
| 11.226 | 11.041 | 10.976 | 11.095 | 10.819 | 10.122 |
| 6.734  | 6.050  | 6.109  | 6.348  | 5.799  | 4.442  |
| 4.659  | 4.316  | 4.233  | 4.731  | 3.949  | 3.105  |
| 10.645 | 10.490 | 10.420 | 10.707 | 10.143 | 9.389  |
| 11.134 | 11.001 | 10.821 | 11.103 | 10.618 | 10.208 |
| 3.150  | 2.870  | 3.210  | 3.125  | 2.481  | 1.764  |
| 8.794  | 8.495  | 8.182  | 8.346  | 7.668  | 7.031  |
| 8.252  | 8.080  | 7.667  | 7.685  | 7.380  | 6.414  |

|        |        |        |        |        |        |
|--------|--------|--------|--------|--------|--------|
| 4.783  | 4.221  | 4.807  | 4.327  | 3.497  | 1.940  |
| 9.530  | 8.942  | 8.907  | 9.044  | 8.390  | 7.229  |
| 7.657  | 7.408  | 7.001  | 7.544  | 6.882  | 5.895  |
| 6.678  | 5.763  | 6.225  | 6.113  | 5.262  | 3.739  |
| 6.065  | 5.913  | 6.323  | 6.382  | 5.413  | 4.368  |
| 11.736 | 11.587 | 11.514 | 11.768 | 11.514 | 10.787 |
| 5.061  | 4.879  | 5.131  | 5.382  | 4.452  | 3.439  |
| 3.448  | 2.633  | 2.724  | 3.137  | 2.294  | 1.452  |
| 11.344 | 11.129 | 11.080 | 11.210 | 10.971 | 10.031 |
| 5.185  | 4.385  | 4.583  | 5.416  | 4.356  | 4.623  |
| 11.591 | 11.465 | 11.407 | 11.604 | 11.272 | 10.567 |
| 11.587 | 11.480 | 11.367 | 11.595 | 11.184 | 10.558 |
| 11.502 | 11.367 | 11.245 | 11.460 | 11.316 | 10.633 |
| 3.654  | 3.545  | 4.288  | 3.663  | 3.103  | 2.057  |
| 8.001  | 7.911  | 8.041  | 8.135  | 7.611  | 6.738  |
| 9.696  | 9.812  | 9.632  | 9.416  | 8.834  | 8.774  |
| 3.435  | 1.657  | 3.061  | 3.683  | 1.706  | 1.863  |
| 7.437  | 7.437  | 7.254  | 7.337  | 6.695  | 6.970  |
| 7.264  | 7.082  | 7.173  | 7.066  | 6.493  | 6.212  |
| 6.173  | 4.508  | 5.456  | 5.537  | 4.613  | 5.158  |
| 5.623  | 4.397  | 4.344  | 5.258  | 4.314  | 3.404  |
| 7.006  | 6.351  | 6.802  | 6.633  | 6.374  | 4.706  |
| 5.800  | 5.443  | 5.699  | 5.919  | 5.491  | 3.235  |
| 7.623  | 7.239  | 7.218  | 7.476  | 7.083  | 5.778  |
| 7.112  | 6.412  | 6.638  | 7.090  | 6.429  | 4.922  |
| 7.795  | 7.296  | 7.662  | 7.706  | 7.359  | 7.686  |
| 7.954  | 7.521  | 7.966  | 7.920  | 7.513  | 7.946  |
| 5.821  | 5.523  | 5.202  | 5.421  | 5.466  | 5.500  |
| 4.095  | 2.642  | 3.486  | 3.604  | 3.946  | 4.673  |
| 2.231  | 2.188  | 2.043  | 1.433  | 2.614  | 2.749  |
| 2.540  | 2.605  | 2.162  | 3.357  | 2.133  | 3.556  |
| 2.869  | 2.869  | 3.159  | 2.455  | 2.559  | 1.461  |
| 4.755  | 4.665  | 4.689  | 4.904  | 4.259  | 4.407  |
| 3.805  | 2.960  | 3.347  | 3.113  | 3.527  | 4.348  |
| 4.977  | 4.747  | 3.743  | 5.120  | 4.516  | 5.650  |
| 7.172  | 7.063  | 7.003  | 6.482  | 6.173  | 6.838  |
| 4.024  | 3.353  | 3.991  | 4.189  | 3.865  | 4.090  |
| 4.870  | 4.175  | 4.743  | 4.477  | 4.038  | 5.671  |
| 8.786  | 8.324  | 8.395  | 8.824  | 8.123  | 8.771  |
| 6.775  | 6.292  | 6.085  | 6.599  | 6.242  | 7.230  |
| 2.912  | 2.127  | 2.385  | 2.630  | 2.817  | 3.052  |
| 4.744  | 4.782  | 3.364  | 3.980  | 4.870  | 3.392  |
| 5.665  | 5.261  | 5.749  | 5.201  | 5.166  | 5.276  |
| 1.387  | 1.492  | 1.070  | 1.474  | 1.254  | 1.399  |
| 3.409  | 2.888  | 2.792  | 3.283  | 2.897  | 1.925  |
| 4.461  | 4.176  | 3.770  | 3.940  | 4.304  | 3.803  |
| 4.286  | 4.511  | 4.193  | 4.352  | 3.871  | 4.878  |
| 4.281  | 4.259  | 3.947  | 3.849  | 2.807  | 4.133  |
| 7.436  | 7.289  | 7.527  | 7.636  | 7.285  | 7.499  |
| 5.434  | 5.551  | 5.723  | 5.632  | 5.244  | 5.367  |

|        |        |        |        |        |        |
|--------|--------|--------|--------|--------|--------|
| 8.473  | 8.410  | 8.529  | 8.332  | 8.316  | 8.471  |
| 5.306  | 4.749  | 4.812  | 5.287  | 4.732  | 5.841  |
| 5.027  | 4.442  | 4.122  | 4.555  | 4.394  | 5.271  |
| 2.177  | 1.419  | 1.584  | 2.286  | 2.948  | 2.712  |
| 4.447  | 4.002  | 3.945  | 3.494  | 3.805  | 4.043  |
| 5.685  | 5.511  | 5.342  | 5.100  | 5.225  | 5.118  |
| 4.490  | 3.547  | 3.829  | 3.757  | 3.864  | 3.326  |
| 6.488  | 5.811  | 6.213  | 5.832  | 5.624  | 6.315  |
| 8.354  | 8.048  | 8.081  | 8.146  | 7.691  | 8.393  |
| 4.837  | 6.262  | 4.676  | 5.866  | 4.594  | 5.638  |
| 5.089  | 5.016  | 5.060  | 4.244  | 5.341  | 5.439  |
| 5.010  | 4.397  | 4.773  | 5.093  | 4.307  | 4.530  |
| 2.012  | 2.429  | 2.641  | 2.515  | 2.966  | 3.231  |
| 2.985  | 2.583  | 3.231  | 2.268  | 2.660  | 2.574  |
| 11.117 | 11.113 | 11.326 | 10.926 | 10.464 | 11.208 |
| 2.687  | 2.468  | 1.167  | 2.549  | 2.395  | 2.048  |
| 8.393  | 8.183  | 8.657  | 7.935  | 7.374  | 8.293  |
| 2.405  | 2.626  | 2.287  | 2.056  | 2.123  | 2.276  |
| 2.138  | 2.126  | 2.358  | 2.420  | 1.541  | 1.885  |
| 4.786  | 4.440  | 4.487  | 3.525  | 3.622  | 3.990  |
| 3.675  | 3.586  | 3.126  | 3.852  | 3.190  | 3.392  |
| 2.391  | 1.397  | 2.274  | 2.399  | 2.333  | 1.906  |
| 8.175  | 7.560  | 7.962  | 7.845  | 7.241  | 7.099  |
| 6.041  | 5.810  | 5.692  | 5.544  | 5.418  | 5.414  |
| 4.071  | 3.159  | 3.842  | 3.861  | 3.569  | 3.751  |
| 7.179  | 6.342  | 7.139  | 6.588  | 6.786  | 7.052  |
| 4.814  | 4.690  | 4.234  | 4.847  | 3.331  | 3.900  |
| 7.440  | 7.453  | 7.086  | 7.524  | 7.215  | 7.507  |
| 3.252  | 2.078  | 2.222  | 3.374  | 3.672  | 2.807  |
| 0.918  | 1.072  | 1.764  | 1.238  | 1.861  | 2.464  |
| 7.368  | 7.065  | 7.160  | 6.996  | 7.011  | 5.683  |
| 6.192  | 5.595  | 5.457  | 6.076  | 5.479  | 5.206  |
| 10.526 | 10.353 | 9.870  | 10.113 | 9.838  | 9.929  |
| 6.096  | 5.619  | 5.712  | 6.336  | 6.232  | 6.371  |
| 6.796  | 6.928  | 7.134  | 6.738  | 6.972  | 5.670  |
| 7.530  | 7.298  | 7.220  | 6.940  | 7.213  | 4.472  |
| 7.606  | 7.414  | 7.491  | 7.830  | 7.277  | 6.570  |
| 5.303  | 5.600  | 5.331  | 5.555  | 5.722  | 6.577  |
| 5.492  | 6.002  | 5.483  | 5.885  | 5.966  | 4.481  |
| 4.311  | 4.622  | 4.593  | 4.565  | 4.048  | 3.793  |
| 3.802  | 4.084  | 4.192  | 4.336  | 4.141  | 5.259  |
| 1.741  | 2.273  | 2.306  | 1.827  | 1.138  | 2.217  |
| 3.610  | 3.366  | 4.041  | 3.688  | 4.192  | 4.832  |
| 6.375  | 6.693  | 6.496  | 6.508  | 6.791  | 7.954  |
| 5.196  | 4.628  | 4.805  | 3.734  | 4.621  | 2.646  |
| 4.682  | 4.547  | 4.768  | 4.281  | 4.908  | 4.927  |
| 6.198  | 7.169  | 6.652  | 6.686  | 6.991  | 6.948  |
| 6.286  | 5.812  | 6.010  | 6.010  | 5.558  | 5.832  |
| 7.046  | 6.860  | 6.989  | 6.903  | 6.996  | 6.414  |
| 7.619  | 6.032  | 5.825  | 5.811  | 7.102  | 4.941  |

|       |       |       |       |       |       |
|-------|-------|-------|-------|-------|-------|
| 4.997 | 5.574 | 5.567 | 5.603 | 5.232 | 6.112 |
| 6.853 | 6.882 | 7.083 | 6.817 | 6.809 | 6.005 |
| 3.921 | 4.090 | 4.096 | 3.440 | 4.038 | 3.509 |
| 4.145 | 4.335 | 4.561 | 3.529 | 4.563 | 3.748 |
| 6.880 | 6.910 | 6.807 | 6.723 | 6.490 | 5.843 |
| 3.667 | 3.374 | 3.168 | 3.870 | 3.795 | 2.416 |
| 6.502 | 5.883 | 6.024 | 6.525 | 6.382 | 4.586 |
| 6.737 | 6.162 | 6.389 | 6.236 | 6.231 | 4.001 |
| 6.213 | 5.975 | 6.360 | 6.224 | 6.197 | 5.242 |
| 3.727 | 2.264 | 2.983 | 2.535 | 2.423 | 4.148 |
| 4.330 | 4.396 | 5.116 | 4.346 | 4.275 | 2.070 |
| 6.150 | 5.607 | 5.537 | 5.306 | 5.321 | 4.182 |
| 4.910 | 5.684 | 4.913 | 4.747 | 5.451 | 2.998 |
| 2.323 | 2.403 | 2.354 | 2.337 | 2.352 | 2.632 |
| 3.775 | 3.847 | 3.480 | 2.993 | 3.382 | 2.522 |
| 3.917 | 3.598 | 4.195 | 4.343 | 4.521 | 5.736 |
| 4.161 | 3.528 | 3.606 | 3.616 | 4.187 | 4.627 |
| 2.796 | 2.043 | 1.919 | 2.940 | 2.033 | 2.385 |
| 3.518 | 3.630 | 3.430 | 3.769 | 3.739 | 4.808 |
| 5.923 | 5.582 | 5.563 | 5.891 | 5.700 | 5.285 |
| 4.970 | 4.555 | 4.995 | 5.224 | 5.524 | 6.640 |
| 8.427 | 7.258 | 7.867 | 7.943 | 8.054 | 8.193 |
| 2.648 | 1.799 | 2.337 | 2.271 | 2.989 | 3.591 |
| 6.626 | 6.208 | 5.878 | 6.024 | 6.679 | 6.983 |
| 4.310 | 4.333 | 4.374 | 4.231 | 4.104 | 4.343 |
| 4.158 | 4.621 | 4.867 | 4.108 | 4.650 | 5.055 |
| 3.345 | 3.762 | 4.001 | 3.574 | 4.595 | 3.174 |
| 1.340 | 1.228 | 1.432 | 1.153 | 1.150 | 1.387 |
| 4.378 | 3.652 | 3.794 | 4.305 | 4.020 | 3.072 |
| 2.009 | 2.528 | 1.867 | 2.175 | 2.011 | 2.035 |
| 2.813 | 2.479 | 1.671 | 3.044 | 2.460 | 2.560 |
| 5.661 | 5.476 | 5.067 | 5.307 | 5.510 | 7.629 |
| 5.291 | 5.494 | 5.420 | 5.127 | 5.185 | 6.593 |
| 2.691 | 2.957 | 2.852 | 2.880 | 2.744 | 4.013 |
| 2.121 | 2.240 | 2.499 | 1.989 | 2.177 | 2.041 |
| 3.418 | 3.723 | 3.691 | 3.346 | 3.182 | 3.326 |
| 3.234 | 3.312 | 3.343 | 2.451 | 2.533 | 3.045 |
| 2.387 | 1.862 | 3.479 | 3.419 | 2.286 | 2.313 |
| 2.609 | 2.032 | 2.521 | 1.958 | 2.579 | 1.883 |
| 4.315 | 4.570 | 4.162 | 4.856 | 4.415 | 5.743 |
| 2.824 | 3.864 | 3.391 | 4.323 | 3.969 | 4.900 |
| 4.135 | 3.715 | 4.015 | 4.090 | 3.549 | 3.075 |
| 5.006 | 5.291 | 5.587 | 5.347 | 5.158 | 4.881 |
| 4.876 | 5.390 | 5.051 | 5.065 | 4.952 | 3.682 |
| 4.263 | 3.188 | 2.895 | 4.133 | 4.118 | 4.358 |
| 2.439 | 2.789 | 1.821 | 2.519 | 3.206 | 2.499 |
| 3.490 | 3.669 | 3.595 | 3.669 | 3.629 | 3.307 |
| 6.264 | 6.773 | 6.470 | 6.077 | 6.851 | 3.859 |
| 4.568 | 4.497 | 4.725 | 4.637 | 4.695 | 5.170 |
| 8.958 | 9.074 | 9.153 | 8.947 | 9.121 | 8.603 |

|       |        |        |       |       |        |
|-------|--------|--------|-------|-------|--------|
| 5.208 | 5.338  | 5.185  | 5.118 | 5.240 | 4.810  |
| 1.628 | 2.589  | 2.013  | 1.917 | 2.014 | 2.125  |
| 6.718 | 6.566  | 6.538  | 6.739 | 6.385 | 5.001  |
| 4.654 | 4.419  | 4.672  | 4.985 | 4.895 | 2.723  |
| 1.533 | 2.356  | 2.232  | 2.272 | 2.745 | 2.885  |
| 2.103 | 1.730  | 1.943  | 1.676 | 1.680 | 2.482  |
| 6.988 | 7.331  | 7.053  | 7.397 | 7.312 | 6.776  |
| 6.965 | 6.974  | 6.872  | 6.991 | 7.251 | 6.929  |
| 5.844 | 6.059  | 5.845  | 6.159 | 6.258 | 6.896  |
| 6.722 | 6.314  | 5.896  | 6.959 | 6.721 | 7.739  |
| 9.606 | 10.065 | 11.094 | 9.798 | 9.907 | 11.053 |
| 2.859 | 3.129  | 2.299  | 2.321 | 2.856 | 2.405  |
| 4.973 | 4.397  | 5.541  | 4.397 | 4.495 | 3.953  |
| 5.089 | 5.173  | 4.680  | 4.963 | 4.849 | 4.604  |
| 5.196 | 5.078  | 5.860  | 5.126 | 5.535 | 3.210  |
| 2.416 | 1.813  | 1.813  | 1.212 | 1.782 | 1.685  |
| 5.345 | 4.687  | 5.071  | 4.457 | 4.371 | 3.904  |
| 4.714 | 4.255  | 4.938  | 4.342 | 4.812 | 3.719  |
| 5.195 | 4.951  | 5.260  | 4.927 | 4.954 | 4.663  |
| 7.343 | 7.519  | 7.585  | 7.664 | 7.493 | 6.554  |
| 6.108 | 6.328  | 6.018  | 6.254 | 6.413 | 5.616  |
| 5.389 | 5.272  | 5.158  | 5.441 | 5.059 | 4.872  |
| 6.762 | 6.628  | 6.454  | 6.518 | 6.614 | 5.120  |
| 5.783 | 5.983  | 5.989  | 5.893 | 5.812 | 4.498  |
| 5.937 | 6.666  | 6.308  | 6.488 | 6.414 | 7.582  |
| 4.921 | 3.514  | 3.936  | 4.738 | 4.643 | 5.165  |
| 5.206 | 5.719  | 5.336  | 5.669 | 5.266 | 5.890  |
| 4.950 | 5.683  | 4.992  | 5.805 | 5.687 | 2.419  |
| 2.851 | 3.314  | 2.908  | 3.114 | 3.711 | 3.900  |
| 6.221 | 6.795  | 6.440  | 6.247 | 6.255 | 7.340  |
| 3.836 | 4.495  | 4.417  | 3.624 | 4.124 | 4.138  |
| 7.306 | 7.896  | 7.468  | 6.860 | 7.023 | 7.833  |
| 3.092 | 2.502  | 2.760  | 2.841 | 2.079 | 2.567  |
| 3.607 | 4.183  | 4.060  | 4.189 | 4.151 | 5.604  |
| 5.724 | 5.488  | 5.349  | 5.295 | 5.693 | 6.579  |
| 6.762 | 6.634  | 6.740  | 6.950 | 6.434 | 7.633  |
| 6.177 | 6.175  | 6.053  | 5.980 | 5.913 | 7.830  |
| 9.045 | 8.221  | 8.298  | 7.607 | 7.940 | 7.547  |
| 1.749 | 1.740  | 1.715  | 1.963 | 2.307 | 2.560  |
| 2.844 | 3.240  | 2.837  | 2.897 | 2.999 | 3.967  |
| 7.582 | 7.798  | 7.744  | 7.725 | 7.888 | 7.143  |
| 6.317 | 5.886  | 5.935  | 6.170 | 5.851 | 4.817  |
| 7.786 | 7.958  | 8.016  | 8.133 | 7.862 | 7.747  |
| 4.602 | 4.630  | 4.114  | 4.443 | 4.139 | 6.721  |
| 3.095 | 2.485  | 2.607  | 2.744 | 2.935 | 3.204  |
| 5.176 | 5.145  | 4.768  | 4.991 | 4.924 | 4.144  |
| 6.469 | 6.418  | 6.402  | 6.589 | 6.232 | 3.878  |
| 3.945 | 4.595  | 3.994  | 4.370 | 3.931 | 3.241  |
| 5.288 | 5.584  | 5.558  | 5.228 | 5.057 | 4.727  |
| 5.249 | 5.026  | 5.170  | 5.066 | 5.004 | 4.496  |

|       |       |       |       |       |       |
|-------|-------|-------|-------|-------|-------|
| 5.823 | 5.611 | 5.828 | 5.234 | 5.670 | 3.924 |
| 3.029 | 2.512 | 2.887 | 2.118 | 2.575 | 2.803 |
| 6.489 | 6.556 | 6.584 | 6.406 | 6.525 | 7.089 |
| 4.177 | 4.363 | 4.504 | 4.385 | 4.472 | 5.139 |
| 5.860 | 6.235 | 6.238 | 5.867 | 6.174 | 5.191 |
| 4.442 | 3.845 | 4.424 | 3.607 | 3.791 | 3.480 |
| 6.035 | 7.872 | 6.813 | 6.425 | 7.044 | 6.248 |
| 5.278 | 4.502 | 5.167 | 4.181 | 4.168 | 2.867 |
| 6.302 | 6.295 | 6.672 | 5.828 | 6.317 | 3.946 |
| 2.984 | 2.851 | 2.938 | 3.240 | 2.977 | 1.864 |
| 2.946 | 3.300 | 2.492 | 2.280 | 3.397 | 1.242 |
| 6.036 | 6.093 | 6.127 | 5.860 | 5.948 | 3.505 |
| 4.153 | 4.292 | 4.571 | 5.249 | 5.474 | 7.254 |
| 4.720 | 4.748 | 4.644 | 4.428 | 4.670 | 3.800 |
| 4.395 | 4.067 | 4.325 | 4.264 | 4.299 | 3.379 |
| 2.755 | 2.451 | 2.970 | 2.211 | 2.614 | 3.518 |
| 3.145 | 3.915 | 3.955 | 3.463 | 3.264 | 4.765 |
| 4.631 | 4.594 | 4.680 | 5.326 | 4.865 | 3.698 |
| 3.901 | 3.169 | 2.754 | 2.758 | 3.348 | 5.179 |
| 5.191 | 5.580 | 5.062 | 5.595 | 5.472 | 6.300 |
| 6.117 | 5.802 | 6.054 | 6.122 | 5.918 | 1.967 |
| 7.283 | 7.639 | 7.354 | 7.331 | 7.267 | 6.438 |
| 8.396 | 8.251 | 8.403 | 8.426 | 8.033 | 5.773 |
| 4.420 | 4.820 | 4.705 | 4.361 | 4.406 | 4.203 |
| 7.298 | 6.993 | 7.262 | 6.823 | 7.109 | 4.997 |
| 2.573 | 3.356 | 3.834 | 3.084 | 3.428 | 3.339 |
| 4.967 | 4.286 | 5.159 | 3.943 | 4.160 | 4.720 |
| 5.969 | 6.150 | 5.570 | 6.155 | 6.048 | 3.133 |
| 2.548 | 3.026 | 2.453 | 2.819 | 1.892 | 3.591 |
| 5.701 | 5.805 | 6.066 | 6.163 | 5.808 | 4.858 |
| 3.990 | 3.710 | 4.036 | 3.872 | 4.144 | 2.195 |
| 4.788 | 4.928 | 5.015 | 4.786 | 4.959 | 3.985 |
| 4.076 | 3.417 | 3.389 | 3.813 | 3.570 | 3.989 |
| 5.669 | 5.539 | 5.671 | 5.528 | 5.384 | 6.407 |
| 6.879 | 6.608 | 6.501 | 6.353 | 6.507 | 5.881 |
| 3.548 | 3.938 | 3.470 | 3.689 | 3.634 | 3.603 |
| 4.897 | 5.211 | 4.854 | 5.503 | 5.291 | 6.201 |
| 7.026 | 7.790 | 7.663 | 7.524 | 7.999 | 6.900 |
| 5.439 | 5.364 | 5.330 | 5.436 | 5.538 | 6.516 |
| 8.073 | 8.287 | 8.140 | 8.032 | 8.323 | 8.511 |
| 5.993 | 5.983 | 6.221 | 6.227 | 6.050 | 3.205 |
| 4.771 | 4.677 | 4.673 | 4.550 | 4.515 | 3.754 |
| 6.624 | 7.132 | 7.080 | 6.921 | 6.824 | 5.841 |
| 2.979 | 4.567 | 4.871 | 1.913 | 3.544 | 1.593 |
| 2.587 | 2.730 | 2.531 | 2.812 | 2.549 | 2.729 |
| 1.662 | 2.745 | 2.768 | 2.766 | 2.794 | 2.043 |
| 7.115 | 7.185 | 7.261 | 6.667 | 6.903 | 5.308 |
| 3.944 | 4.600 | 4.428 | 2.867 | 3.284 | 5.610 |
| 2.974 | 2.848 | 2.615 | 3.142 | 3.724 | 2.419 |
| 4.602 | 4.820 | 4.536 | 4.383 | 4.447 | 4.689 |



|        |        |        |        |        |       |
|--------|--------|--------|--------|--------|-------|
| 3.680  | 4.193  | 4.356  | 3.892  | 4.295  | 3.249 |
| 4.796  | 4.315  | 4.199  | 4.312  | 4.194  | 4.938 |
| 5.060  | 5.151  | 5.104  | 5.015  | 5.162  | 4.380 |
| 4.120  | 3.750  | 4.422  | 4.007  | 3.969  | 6.904 |
| 3.672  | 4.167  | 4.013  | 3.890  | 3.770  | 5.477 |
| 10.105 | 10.587 | 10.597 | 10.348 | 10.377 | 8.911 |
| 7.277  | 6.772  | 7.250  | 7.397  | 7.364  | 6.264 |
| 6.200  | 6.624  | 6.447  | 6.481  | 6.447  | 7.213 |
| 8.648  | 8.432  | 8.261  | 8.138  | 8.249  | 8.527 |
| 5.044  | 4.975  | 5.071  | 4.847  | 5.127  | 4.412 |
| 2.069  | 2.150  | 1.843  | 1.777  | 2.189  | 5.421 |
| 6.106  | 5.836  | 6.029  | 6.467  | 5.755  | 4.083 |
| 6.657  | 6.649  | 6.631  | 6.597  | 6.519  | 6.122 |
| 3.434  | 3.470  | 3.448  | 3.169  | 3.397  | 2.711 |
| 6.608  | 6.709  | 6.789  | 6.642  | 6.673  | 5.071 |
| 4.130  | 4.041  | 3.458  | 4.770  | 3.974  | 3.370 |
| 5.347  | 4.787  | 5.521  | 5.136  | 5.416  | 4.107 |
| 8.026  | 7.972  | 7.727  | 7.932  | 8.212  | 7.139 |
| 3.013  | 2.849  | 2.730  | 2.210  | 3.064  | 3.003 |
| 5.450  | 5.571  | 5.716  | 5.774  | 6.196  | 3.481 |
| 9.288  | 9.382  | 9.334  | 9.566  | 9.481  | 7.819 |
| 5.674  | 5.292  | 5.493  | 5.209  | 5.078  | 6.231 |
| 5.195  | 5.483  | 5.258  | 5.056  | 5.203  | 5.618 |
| 10.941 | 10.862 | 10.974 | 10.951 | 10.820 | 9.304 |
| 2.843  | 3.920  | 3.425  | 2.580  | 3.200  | 3.871 |
| 6.423  | 6.679  | 6.384  | 6.811  | 6.725  | 7.642 |
| 7.744  | 7.826  | 7.749  | 7.761  | 7.720  | 6.351 |
| 3.235  | 2.955  | 3.596  | 3.157  | 2.922  | 2.124 |
| 8.676  | 8.499  | 8.574  | 8.840  | 8.430  | 6.729 |
| 5.308  | 5.157  | 4.963  | 5.294  | 5.406  | 5.132 |
| 5.137  | 5.292  | 5.020  | 4.800  | 4.816  | 2.120 |
| 5.590  | 5.603  | 5.602  | 5.563  | 5.512  | 6.099 |
| 7.111  | 7.509  | 7.642  | 7.488  | 7.536  | 6.680 |
| 5.295  | 5.375  | 5.179  | 5.818  | 5.505  | 6.073 |
| 5.995  | 6.279  | 5.851  | 6.218  | 5.818  | 5.307 |
| 4.285  | 4.234  | 4.380  | 4.484  | 5.072  | 4.114 |
| 2.516  | 2.166  | 2.569  | 2.474  | 2.713  | 3.126 |
| 3.192  | 2.125  | 2.380  | 2.766  | 1.855  | 1.456 |
| 4.556  | 5.244  | 5.217  | 4.838  | 4.595  | 5.090 |
| 7.566  | 7.878  | 7.704  | 7.665  | 7.799  | 5.595 |
| 6.165  | 5.000  | 4.914  | 6.479  | 5.716  | 6.924 |
| 5.836  | 6.080  | 5.110  | 5.930  | 5.980  | 6.194 |
| 2.877  | 3.521  | 3.021  | 3.346  | 2.348  | 3.414 |
| 6.542  | 6.603  | 6.382  | 6.140  | 6.494  | 6.236 |
| 5.687  | 6.101  | 5.801  | 5.784  | 5.567  | 4.842 |
| 3.435  | 3.261  | 3.207  | 3.297  | 4.110  | 5.392 |
| 2.552  | 3.388  | 3.225  | 2.688  | 2.828  | 4.278 |
| 6.164  | 6.186  | 5.778  | 6.112  | 6.076  | 4.780 |
| 4.949  | 5.305  | 5.032  | 5.180  | 5.710  | 4.426 |
| 3.760  | 3.970  | 3.517  | 3.425  | 3.356  | 3.057 |

|       |       |       |       |       |       |
|-------|-------|-------|-------|-------|-------|
| 8.777 | 8.902 | 8.838 | 8.872 | 9.124 | 7.405 |
| 9.334 | 9.630 | 9.581 | 9.383 | 9.470 | 6.566 |
| 5.879 | 6.469 | 6.041 | 6.122 | 6.695 | 5.811 |
| 3.169 | 3.655 | 3.816 | 3.803 | 4.422 | 3.605 |
| 4.241 | 4.084 | 3.730 | 3.791 | 4.366 | 5.539 |
| 6.719 | 7.185 | 7.251 | 6.887 | 7.380 | 4.673 |
| 5.789 | 5.367 | 5.779 | 5.837 | 5.750 | 4.497 |
| 4.225 | 3.970 | 3.684 | 3.429 | 4.016 | 2.677 |
| 3.175 | 3.106 | 3.375 | 2.775 | 2.555 | 3.844 |
| 4.595 | 4.903 | 4.817 | 4.652 | 4.692 | 4.014 |
| 2.621 | 3.605 | 3.060 | 2.899 | 2.690 | 4.335 |
| 9.401 | 9.361 | 9.469 | 9.073 | 9.109 | 6.808 |
| 9.216 | 8.974 | 9.070 | 9.051 | 8.800 | 6.493 |
| 5.656 | 5.567 | 5.575 | 5.903 | 5.359 | 3.809 |
| 2.131 | 2.995 | 2.364 | 2.444 | 2.721 | 2.698 |
| 7.602 | 7.338 | 7.423 | 7.706 | 7.361 | 6.523 |
| 2.658 | 3.384 | 3.515 | 3.395 | 3.825 | 4.573 |
| 6.805 | 6.399 | 6.438 | 6.417 | 6.463 | 4.971 |
| 6.748 | 6.380 | 6.508 | 6.214 | 6.538 | 4.984 |
| 5.416 | 5.963 | 5.534 | 5.935 | 5.835 | 4.349 |
| 5.871 | 5.524 | 6.108 | 5.663 | 6.014 | 6.863 |
| 6.197 | 6.454 | 6.521 | 6.222 | 6.661 | 5.029 |
| 8.311 | 8.684 | 8.591 | 8.393 | 8.519 | 6.876 |
| 6.182 | 6.241 | 6.160 | 6.556 | 6.735 | 8.485 |
| 1.646 | 1.688 | 2.036 | 2.540 | 1.942 | 3.190 |
| 5.813 | 4.442 | 4.985 | 5.088 | 5.093 | 4.283 |
| 6.074 | 5.767 | 6.086 | 5.951 | 6.065 | 6.190 |
| 3.591 | 4.342 | 3.878 | 4.044 | 3.787 | 2.591 |
| 6.349 | 6.683 | 6.433 | 6.663 | 6.340 | 5.341 |
| 6.004 | 6.614 | 6.231 | 6.126 | 6.417 | 5.082 |
| 5.801 | 6.056 | 5.815 | 5.948 | 6.174 | 7.685 |
| 6.987 | 6.883 | 7.169 | 7.341 | 7.081 | 4.317 |
| 5.417 | 4.328 | 4.912 | 4.893 | 5.100 | 3.410 |
| 3.748 | 3.406 | 3.517 | 2.935 | 3.550 | 2.646 |
| 6.206 | 6.570 | 6.189 | 6.039 | 5.817 | 3.936 |
| 6.320 | 5.888 | 6.492 | 6.526 | 6.245 | 5.583 |
| 6.639 | 6.304 | 6.587 | 6.183 | 6.182 | 3.349 |
| 7.021 | 6.675 | 7.156 | 6.492 | 6.636 | 5.384 |
| 6.834 | 7.312 | 6.299 | 6.735 | 7.334 | 6.758 |
| 5.158 | 5.234 | 4.894 | 4.900 | 5.242 | 3.915 |
| 9.006 | 9.561 | 9.567 | 9.434 | 9.421 | 7.942 |
| 7.307 | 6.869 | 7.170 | 6.943 | 7.302 | 5.085 |
| 2.779 | 3.371 | 3.606 | 2.850 | 3.576 | 3.397 |
| 6.459 | 6.297 | 6.043 | 6.050 | 5.944 | 2.301 |
| 5.765 | 5.660 | 6.095 | 6.119 | 5.756 | 5.059 |
| 3.669 | 3.319 | 4.150 | 3.515 | 4.012 | 4.181 |
| 3.998 | 3.024 | 2.798 | 4.054 | 3.583 | 4.833 |
| 4.403 | 4.783 | 4.948 | 4.506 | 4.359 | 3.199 |
| 2.357 | 3.040 | 3.243 | 2.848 | 3.932 | 3.313 |
| 3.757 | 4.813 | 4.036 | 3.688 | 4.207 | 3.555 |

|       |       |       |       |       |       |
|-------|-------|-------|-------|-------|-------|
| 3.434 | 3.518 | 3.590 | 3.044 | 3.668 | 1.578 |
| 3.835 | 4.071 | 3.906 | 3.861 | 3.816 | 2.158 |
| 4.571 | 4.740 | 4.319 | 4.750 | 4.781 | 3.640 |
| 3.861 | 4.139 | 3.836 | 3.943 | 4.049 | 3.615 |
| 3.389 | 2.502 | 3.727 | 2.679 | 3.023 | 2.975 |
| 2.212 | 3.350 | 2.452 | 2.704 | 2.007 | 2.620 |
| 4.858 | 5.459 | 5.385 | 5.325 | 5.352 | 4.567 |
| 6.758 | 6.487 | 6.197 | 6.963 | 6.765 | 6.302 |
| 6.055 | 5.885 | 6.016 | 5.875 | 6.135 | 4.833 |
| 4.613 | 5.022 | 5.282 | 4.915 | 4.955 | 4.111 |
| 2.528 | 3.402 | 2.784 | 1.858 | 2.988 | 3.807 |
| 5.247 | 4.157 | 3.721 | 4.537 | 4.944 | 4.600 |
| 2.405 | 2.273 | 2.072 | 1.639 | 2.342 | 2.377 |
| 7.922 | 8.242 | 8.136 | 7.923 | 8.017 | 6.200 |
| 2.164 | 2.430 | 2.714 | 1.607 | 1.758 | 3.523 |
| 4.652 | 4.275 | 4.628 | 4.461 | 4.632 | 5.487 |
| 5.360 | 5.440 | 5.233 | 5.315 | 5.454 | 7.056 |
| 8.051 | 7.908 | 7.998 | 7.805 | 7.964 | 7.334 |
| 4.310 | 4.433 | 4.569 | 3.637 | 4.543 | 4.186 |
| 4.510 | 4.592 | 4.779 | 3.897 | 4.591 | 4.408 |
| 3.190 | 3.184 | 3.135 | 3.093 | 3.140 | 4.117 |
| 5.383 | 5.220 | 4.854 | 5.666 | 5.637 | 5.585 |
| 2.975 | 2.726 | 3.379 | 4.308 | 2.757 | 3.024 |
| 3.306 | 2.787 | 3.268 | 4.039 | 3.423 | 4.471 |
| 4.776 | 3.458 | 4.458 | 4.838 | 3.815 | 5.457 |
| 2.748 | 2.402 | 2.380 | 3.323 | 2.401 | 2.748 |
| 2.934 | 2.667 | 2.461 | 3.402 | 2.574 | 3.663 |
| 5.306 | 4.543 | 4.991 | 5.287 | 4.551 | 5.324 |
| 3.991 | 2.858 | 3.138 | 4.025 | 4.023 | 4.412 |
| 4.720 | 3.212 | 4.097 | 4.916 | 4.361 | 4.827 |
| 4.827 | 5.399 | 5.408 | 5.471 | 5.750 | 7.111 |
| 4.635 | 5.156 | 4.888 | 5.056 | 5.364 | 5.501 |
| 5.793 | 5.800 | 6.060 | 5.821 | 5.932 | 5.779 |
| 6.519 | 6.668 | 6.848 | 6.418 | 6.451 | 4.777 |
| 4.326 | 4.349 | 4.366 | 4.340 | 4.345 | 4.369 |
| 6.321 | 6.359 | 6.656 | 6.188 | 6.638 | 5.109 |
| 5.641 | 5.637 | 5.571 | 5.432 | 5.662 | 5.903 |
| 6.571 | 7.061 | 6.768 | 6.704 | 6.811 | 5.278 |
| 5.372 | 4.813 | 5.162 | 5.156 | 5.074 | 4.340 |
| 5.130 | 5.440 | 5.661 | 5.654 | 5.577 | 4.303 |
| 6.169 | 5.826 | 5.490 | 5.907 | 5.877 | 1.652 |
| 5.958 | 6.210 | 5.716 | 6.177 | 6.047 | 5.071 |
| 2.760 | 2.259 | 2.310 | 2.347 | 2.552 | 2.272 |
| 4.805 | 3.369 | 3.060 | 3.396 | 4.093 | 2.536 |
| 3.821 | 3.835 | 3.281 | 3.739 | 3.890 | 3.236 |
| 2.662 | 3.029 | 2.823 | 2.396 | 2.715 | 3.797 |
| 5.551 | 5.494 | 5.553 | 5.600 | 5.466 | 5.572 |
| 3.613 | 3.300 | 2.996 | 3.203 | 3.959 | 3.734 |
| 5.784 | 5.953 | 6.427 | 5.862 | 5.666 | 5.020 |
| 4.428 | 3.558 | 3.866 | 4.127 | 3.278 | 4.070 |

|       |       |       |       |       |        |
|-------|-------|-------|-------|-------|--------|
| 3.514 | 3.789 | 3.461 | 3.211 | 3.028 | 3.470  |
| 2.546 | 1.898 | 1.794 | 2.260 | 2.248 | 3.035  |
| 5.167 | 4.720 | 4.715 | 4.321 | 4.599 | 2.946  |
| 6.226 | 5.908 | 6.085 | 6.391 | 6.054 | 7.117  |
| 1.993 | 3.024 | 2.270 | 2.500 | 2.651 | 3.017  |
| 6.009 | 5.638 | 5.894 | 5.988 | 6.045 | 7.169  |
| 3.910 | 4.417 | 4.268 | 3.771 | 3.878 | 3.955  |
| 3.952 | 3.715 | 3.335 | 3.999 | 3.731 | 3.882  |
| 3.972 | 3.638 | 3.916 | 4.528 | 2.833 | 2.981  |
| 5.262 | 5.511 | 5.319 | 5.408 | 5.561 | 4.660  |
| 4.744 | 5.182 | 4.925 | 5.112 | 5.310 | 6.453  |
| 2.897 | 2.269 | 2.487 | 2.317 | 2.494 | 2.284  |
| 2.616 | 2.243 | 2.878 | 3.210 | 3.451 | 2.782  |
| 2.055 | 2.136 | 2.982 | 1.637 | 3.131 | 3.651  |
| 2.157 | 3.272 | 2.681 | 2.786 | 3.027 | 1.207  |
| 2.500 | 2.621 | 2.464 | 2.661 | 2.792 | 2.500  |
| 5.842 | 6.105 | 6.191 | 5.683 | 5.951 | 5.425  |
| 4.991 | 5.046 | 4.960 | 4.948 | 5.048 | 4.861  |
| 3.314 | 3.962 | 3.642 | 3.028 | 3.577 | 2.959  |
| 2.965 | 2.952 | 3.157 | 2.668 | 2.993 | 2.486  |
| 3.483 | 3.812 | 3.753 | 3.893 | 4.145 | 4.191  |
| 5.166 | 5.321 | 4.702 | 4.995 | 4.379 | 4.081  |
| 6.267 | 5.622 | 5.600 | 5.510 | 5.208 | 5.139  |
| 2.344 | 1.656 | 2.399 | 1.596 | 1.707 | 1.651  |
| 2.274 | 1.860 | 1.994 | 1.920 | 2.052 | 1.824  |
| 2.748 | 1.914 | 2.620 | 2.660 | 2.108 | 2.699  |
| 3.822 | 2.763 | 4.180 | 5.682 | 2.318 | 5.430  |
| 5.405 | 5.113 | 5.231 | 5.425 | 5.531 | 6.439  |
| 6.408 | 6.379 | 6.472 | 6.579 | 6.587 | 5.338  |
| 6.305 | 6.129 | 6.109 | 6.424 | 6.161 | 4.335  |
| 6.138 | 5.888 | 6.064 | 5.917 | 6.105 | 5.532  |
| 2.750 | 1.822 | 2.302 | 2.294 | 1.819 | 3.109  |
| 4.332 | 4.146 | 4.279 | 3.862 | 4.029 | 4.918  |
| 5.787 | 5.346 | 4.954 | 5.055 | 5.069 | 4.787  |
| 3.303 | 3.794 | 3.303 | 3.480 | 3.533 | 3.625  |
| 3.051 | 2.216 | 1.819 | 1.700 | 2.570 | 3.138  |
| 4.410 | 4.505 | 4.363 | 4.050 | 4.059 | 2.582  |
| 4.525 | 4.490 | 4.323 | 4.745 | 4.946 | 6.081  |
| 8.564 | 8.166 | 8.379 | 8.077 | 8.278 | 2.149  |
| 5.831 | 5.988 | 5.743 | 5.980 | 5.792 | 5.253  |
| 1.730 | 1.857 | 1.965 | 1.898 | 2.278 | 2.083  |
| 4.259 | 4.794 | 4.584 | 4.993 | 4.970 | 2.592  |
| 4.496 | 4.390 | 4.067 | 4.197 | 4.686 | 4.112  |
| 2.938 | 2.803 | 2.993 | 2.553 | 2.907 | 3.666  |
| 7.874 | 8.791 | 8.087 | 8.863 | 9.353 | 11.232 |
| 4.848 | 5.586 | 5.626 | 5.615 | 5.622 | 5.215  |
| 1.713 | 1.733 | 2.042 | 1.402 | 1.973 | 2.129  |
| 2.235 | 2.240 | 2.598 | 1.988 | 2.330 | 2.501  |
| 7.344 | 7.665 | 7.826 | 7.600 | 8.142 | 6.554  |
| 3.243 | 3.738 | 3.419 | 3.195 | 3.731 | 2.078  |

|       |       |       |       |       |       |
|-------|-------|-------|-------|-------|-------|
| 6.500 | 7.437 | 5.738 | 6.463 | 6.508 | 5.701 |
| 3.600 | 3.272 | 3.712 | 4.104 | 4.279 | 5.454 |
| 4.995 | 4.686 | 4.874 | 4.368 | 4.763 | 5.649 |
| 4.727 | 3.882 | 3.840 | 3.530 | 3.865 | 3.619 |
| 7.589 | 7.515 | 7.638 | 7.195 | 7.293 | 7.089 |
| 1.979 | 1.355 | 1.746 | 2.279 | 1.558 | 2.248 |
| 4.288 | 3.929 | 4.587 | 4.790 | 4.403 | 5.266 |
| 3.839 | 3.835 | 3.621 | 2.623 | 3.323 | 2.862 |
| 5.672 | 6.513 | 5.818 | 5.996 | 5.828 | 6.767 |
| 6.112 | 6.121 | 5.760 | 5.688 | 5.709 | 6.027 |
| 5.007 | 4.508 | 4.797 | 4.036 | 4.721 | 4.090 |
| 2.838 | 2.526 | 2.596 | 2.478 | 2.499 | 2.903 |
| 6.219 | 5.428 | 6.241 | 6.106 | 5.961 | 5.505 |
| 4.570 | 4.953 | 5.305 | 4.201 | 4.919 | 3.826 |
| 2.888 | 3.241 | 2.943 | 2.693 | 3.781 | 3.523 |
| 4.418 | 4.996 | 4.247 | 4.840 | 5.020 | 4.464 |
| 4.239 | 2.821 | 2.949 | 3.154 | 3.456 | 3.163 |
| 6.205 | 4.853 | 5.051 | 4.843 | 5.265 | 4.723 |
| 5.820 | 6.306 | 5.444 | 6.202 | 6.409 | 7.518 |
| 4.243 | 4.139 | 4.512 | 4.292 | 4.715 | 5.996 |
| 4.242 | 3.841 | 4.346 | 4.322 | 4.642 | 4.146 |
| 2.260 | 2.451 | 2.810 | 3.313 | 2.865 | 2.119 |
| 4.311 | 4.452 | 4.178 | 4.215 | 4.341 | 4.746 |
| 3.133 | 3.909 | 2.974 | 4.248 | 4.447 | 4.362 |
| 2.543 | 2.011 | 3.757 | 2.986 | 3.015 | 1.851 |
| 7.010 | 6.800 | 7.162 | 6.964 | 6.852 | 4.366 |
| 4.067 | 2.869 | 3.009 | 4.490 | 2.971 | 2.452 |
| 4.428 | 4.289 | 4.206 | 3.966 | 4.277 | 2.835 |
| 3.916 | 3.979 | 3.572 | 3.897 | 4.195 | 3.451 |
| 4.438 | 4.521 | 4.480 | 4.516 | 4.516 | 4.135 |
| 4.317 | 4.387 | 4.447 | 4.480 | 4.556 | 3.688 |
| 5.625 | 5.998 | 5.775 | 5.657 | 5.593 | 4.779 |
| 5.340 | 5.873 | 5.820 | 6.259 | 5.912 | 6.359 |
| 5.113 | 4.647 | 4.924 | 4.950 | 4.807 | 2.262 |
| 3.176 | 4.005 | 3.788 | 3.024 | 4.495 | 3.145 |
| 2.417 | 3.435 | 3.647 | 2.974 | 2.928 | 3.342 |
| 2.675 | 3.023 | 3.440 | 2.852 | 3.120 | 3.599 |
| 6.423 | 6.307 | 6.921 | 6.700 | 6.403 | 6.136 |
| 4.370 | 4.444 | 4.140 | 5.181 | 5.235 | 5.662 |
| 5.217 | 5.144 | 4.525 | 5.063 | 5.470 | 4.743 |
| 6.744 | 6.256 | 5.894 | 5.596 | 5.465 | 6.306 |
| 7.120 | 7.170 | 7.060 | 6.848 | 7.193 | 7.794 |
| 7.725 | 7.561 | 6.873 | 7.025 | 7.130 | 7.774 |
| 3.579 | 4.378 | 3.681 | 4.667 | 4.226 | 5.900 |
| 7.156 | 6.422 | 6.879 | 6.204 | 7.436 | 6.589 |
| 6.449 | 6.691 | 6.872 | 6.859 | 6.516 | 5.689 |
| 4.243 | 4.049 | 4.625 | 4.837 | 4.962 | 5.960 |
| 6.105 | 5.646 | 5.406 | 5.744 | 5.759 | 8.198 |
| 2.897 | 3.399 | 3.717 | 2.731 | 2.854 | 3.049 |
| 2.607 | 3.392 | 3.083 | 2.388 | 2.485 | 2.832 |

|       |       |       |       |       |       |
|-------|-------|-------|-------|-------|-------|
| 5.799 | 5.478 | 5.714 | 5.315 | 5.388 | 5.052 |
| 5.000 | 5.022 | 4.439 | 4.650 | 4.252 | 4.544 |
| 4.015 | 4.450 | 5.087 | 4.295 | 4.529 | 4.261 |
| 2.206 | 2.559 | 3.046 | 3.394 | 2.996 | 3.528 |
| 6.104 | 5.984 | 5.883 | 5.936 | 5.932 | 7.107 |
| 7.013 | 6.940 | 6.917 | 6.932 | 6.786 | 6.216 |
| 3.767 | 4.200 | 3.726 | 3.495 | 4.094 | 3.888 |
| 3.339 | 4.140 | 3.819 | 2.755 | 2.925 | 4.606 |
| 5.205 | 5.029 | 4.882 | 4.387 | 4.534 | 4.836 |
| 2.986 | 3.942 | 4.511 | 3.176 | 3.474 | 4.115 |
| 5.956 | 4.910 | 5.253 | 5.828 | 5.106 | 7.061 |
| 4.935 | 4.586 | 4.553 | 3.993 | 4.577 | 4.370 |
| 2.749 | 3.252 | 2.781 | 2.220 | 2.296 | 2.748 |
| 2.677 | 3.483 | 3.962 | 2.640 | 3.699 | 4.411 |
| 1.661 | 1.968 | 1.900 | 1.293 | 1.732 | 1.345 |
| 4.411 | 4.692 | 4.933 | 4.720 | 4.983 | 4.517 |
| 7.748 | 6.733 | 6.381 | 7.044 | 6.568 | 6.054 |
| 4.694 | 3.980 | 3.764 | 4.032 | 3.274 | 3.400 |
| 6.088 | 6.483 | 6.162 | 6.293 | 6.511 | 5.167 |
| 2.654 | 3.382 | 3.703 | 2.428 | 2.866 | 3.775 |
| 4.127 | 4.287 | 4.025 | 4.242 | 4.239 | 5.190 |
| 1.918 | 2.068 | 2.244 | 2.194 | 1.973 | 2.324 |
| 3.617 | 4.409 | 4.018 | 4.381 | 4.452 | 5.376 |
| 5.424 | 5.960 | 5.628 | 6.103 | 6.725 | 7.815 |
| 3.023 | 3.231 | 3.588 | 2.660 | 2.554 | 3.528 |
| 4.525 | 4.153 | 5.420 | 4.639 | 4.513 | 4.312 |
| 2.861 | 2.863 | 3.521 | 2.789 | 3.005 | 3.431 |
| 4.440 | 4.738 | 4.846 | 4.987 | 4.811 | 6.305 |
| 2.944 | 2.289 | 2.620 | 1.789 | 2.413 | 2.699 |
| 3.207 | 2.918 | 3.507 | 3.561 | 3.709 | 4.348 |
| 6.703 | 6.997 | 6.688 | 6.644 | 6.797 | 6.004 |
| 6.095 | 6.421 | 6.476 | 6.556 | 6.381 | 5.313 |
| 4.431 | 4.371 | 4.101 | 4.361 | 5.044 | 5.637 |
| 2.769 | 3.495 | 3.785 | 3.686 | 3.586 | 4.463 |
| 4.265 | 3.403 | 3.993 | 3.194 | 3.302 | 1.860 |
| 2.918 | 3.520 | 3.840 | 2.950 | 3.248 | 4.261 |
| 2.344 | 1.939 | 2.510 | 2.616 | 2.140 | 2.925 |
| 8.389 | 8.379 | 8.296 | 8.037 | 8.062 | 6.692 |
| 6.500 | 6.659 | 6.409 | 6.613 | 6.535 | 4.164 |
| 5.637 | 5.440 | 5.436 | 5.417 | 5.406 | 2.781 |
| 4.104 | 4.399 | 4.046 | 4.140 | 3.926 | 4.951 |
| 1.434 | 1.480 | 1.564 | 1.898 | 1.955 | 4.221 |
| 3.241 | 3.512 | 3.135 | 3.133 | 3.397 | 5.000 |
| 4.019 | 4.427 | 4.647 | 4.042 | 4.342 | 5.938 |
| 5.316 | 5.833 | 5.532 | 6.725 | 6.563 | 7.706 |
| 5.350 | 5.587 | 5.390 | 5.683 | 5.699 | 4.271 |
| 7.524 | 7.795 | 7.727 | 7.550 | 7.591 | 7.143 |
| 7.071 | 7.770 | 7.445 | 7.464 | 7.581 | 6.831 |
| 4.918 | 5.427 | 5.331 | 5.307 | 5.259 | 6.334 |
| 2.898 | 2.613 | 2.683 | 3.095 | 2.670 | 1.657 |

|       |       |       |       |       |       |
|-------|-------|-------|-------|-------|-------|
| 5.708 | 6.082 | 5.675 | 5.079 | 5.226 | 2.349 |
| 3.383 | 2.889 | 3.637 | 2.519 | 3.483 | 3.484 |
| 4.714 | 4.566 | 5.216 | 4.569 | 4.302 | 3.386 |
| 5.498 | 5.145 | 5.193 | 4.783 | 5.273 | 4.264 |
| 5.705 | 6.165 | 5.925 | 5.767 | 5.803 | 6.371 |
| 6.714 | 6.551 | 5.864 | 6.862 | 6.907 | 8.492 |
| 5.154 | 5.707 | 4.906 | 5.461 | 5.480 | 5.885 |
| 2.670 | 3.868 | 3.488 | 3.774 | 3.724 | 2.898 |
| 2.875 | 3.423 | 3.152 | 3.752 | 3.240 | 2.910 |
| 6.384 | 6.438 | 6.448 | 6.182 | 6.207 | 5.444 |
| 2.791 | 2.733 | 2.724 | 2.505 | 2.502 | 2.885 |
| 3.152 | 3.499 | 3.325 | 2.738 | 3.264 | 4.782 |
| 4.564 | 5.332 | 5.281 | 4.261 | 4.174 | 5.897 |
| 5.150 | 5.528 | 5.314 | 5.530 | 5.386 | 4.780 |
| 7.141 | 6.755 | 6.614 | 6.705 | 6.632 | 5.403 |
| 4.526 | 4.404 | 5.068 | 4.702 | 5.081 | 3.768 |
| 3.470 | 3.782 | 3.912 | 3.688 | 4.512 | 3.281 |
| 4.411 | 4.801 | 4.398 | 4.418 | 4.508 | 5.473 |
| 7.356 | 6.958 | 7.291 | 7.264 | 7.062 | 6.426 |
| 6.397 | 6.573 | 6.824 | 6.807 | 6.555 | 5.289 |
| 4.999 | 5.908 | 5.149 | 4.823 | 5.074 | 4.125 |
| 6.214 | 6.293 | 6.059 | 5.827 | 6.280 | 4.355 |
| 3.816 | 3.753 | 3.530 | 3.777 | 3.669 | 2.760 |
| 4.681 | 4.677 | 5.039 | 4.708 | 5.139 | 5.500 |
| 6.445 | 5.975 | 5.821 | 5.923 | 5.905 | 4.738 |
| 3.059 | 3.236 | 3.469 | 2.725 | 3.355 | 2.706 |
| 4.056 | 5.117 | 5.165 | 4.188 | 4.733 | 3.868 |
| 3.885 | 4.026 | 4.319 | 4.429 | 4.782 | 6.320 |
| 3.386 | 3.566 | 3.708 | 3.599 | 3.958 | 4.633 |
| 3.578 | 3.318 | 3.816 | 3.030 | 3.348 | 2.612 |
| 3.373 | 3.943 | 3.936 | 4.199 | 3.708 | 4.348 |
| 3.476 | 3.499 | 3.672 | 3.145 | 3.206 | 2.589 |
| 4.649 | 3.978 | 4.777 | 4.696 | 4.302 | 3.750 |
| 2.841 | 3.265 | 3.236 | 3.373 | 3.676 | 3.676 |
| 5.157 | 4.779 | 5.052 | 4.854 | 4.817 | 3.587 |
| 4.603 | 5.148 | 5.250 | 4.979 | 4.955 | 3.341 |
| 6.031 | 6.139 | 6.477 | 6.219 | 6.146 | 5.523 |
| 5.295 | 5.147 | 5.094 | 5.005 | 5.141 | 4.231 |
| 2.556 | 2.823 | 3.212 | 2.178 | 2.228 | 2.694 |
| 4.724 | 5.229 | 5.617 | 4.664 | 5.047 | 7.387 |
| 3.120 | 3.285 | 3.345 | 2.810 | 3.828 | 3.407 |
| 5.300 | 5.184 | 5.702 | 5.754 | 5.050 | 4.698 |
| 2.639 | 1.952 | 1.833 | 2.655 | 3.172 | 2.952 |
| 6.189 | 6.796 | 6.956 | 6.378 | 6.112 | 5.166 |
| 5.702 | 5.680 | 5.824 | 5.917 | 5.975 | 4.864 |
| 4.701 | 4.831 | 4.903 | 5.216 | 4.823 | 5.868 |
| 4.356 | 3.844 | 3.493 | 3.940 | 3.319 | 3.500 |
| 2.635 | 2.538 | 3.013 | 2.627 | 2.877 | 3.976 |
| 2.688 | 2.463 | 2.606 | 2.373 | 2.057 | 2.769 |
| 2.373 | 2.466 | 3.058 | 2.350 | 2.819 | 2.156 |

|       |       |       |       |       |       |
|-------|-------|-------|-------|-------|-------|
| 5.808 | 5.618 | 5.638 | 5.983 | 5.690 | 5.616 |
| 7.957 | 7.572 | 7.615 | 7.434 | 7.540 | 6.125 |
| 4.721 | 5.007 | 5.502 | 5.190 | 5.065 | 4.527 |
| 1.901 | 1.913 | 2.225 | 1.694 | 2.233 | 1.805 |
| 6.052 | 6.395 | 6.170 | 6.882 | 6.814 | 9.235 |
| 6.324 | 6.357 | 5.987 | 6.309 | 6.379 | 5.749 |
| 7.414 | 7.942 | 7.511 | 7.250 | 7.467 | 6.641 |
| 4.878 | 4.419 | 4.873 | 5.121 | 4.375 | 4.324 |
| 3.233 | 3.889 | 3.651 | 3.360 | 3.225 | 3.065 |
| 2.076 | 2.182 | 2.203 | 1.614 | 1.855 | 2.144 |
| 2.735 | 3.095 | 2.806 | 2.981 | 3.658 | 2.795 |
| 4.102 | 3.490 | 4.247 | 4.347 | 4.247 | 3.260 |
| 3.642 | 4.216 | 3.627 | 3.526 | 2.716 | 2.675 |
| 6.293 | 6.560 | 6.318 | 6.688 | 6.698 | 7.625 |
| 2.810 | 3.430 | 3.216 | 3.245 | 2.833 | 3.709 |
| 5.604 | 5.846 | 5.528 | 5.664 | 6.065 | 7.405 |
| 5.496 | 5.241 | 5.121 | 6.180 | 6.514 | 7.477 |
| 4.298 | 3.434 | 3.937 | 4.165 | 4.031 | 5.783 |
| 3.345 | 3.701 | 3.974 | 3.975 | 3.434 | 4.565 |
| 7.910 | 7.828 | 7.747 | 8.076 | 7.642 | 7.599 |
| 9.462 | 9.572 | 9.503 | 9.651 | 9.435 | 8.338 |
| 3.104 | 3.694 | 3.786 | 2.032 | 2.192 | 3.230 |
| 3.850 | 3.603 | 2.848 | 3.523 | 3.817 | 4.030 |
| 4.696 | 5.146 | 5.411 | 5.042 | 5.093 | 5.673 |
| 4.028 | 4.167 | 4.438 | 3.257 | 4.358 | 4.293 |
| 2.462 | 0.919 | 3.440 | 3.090 | 3.341 | 2.350 |
| 7.084 | 6.694 | 6.682 | 6.572 | 6.476 | 5.572 |
| 5.084 | 5.555 | 5.356 | 5.879 | 6.140 | 7.128 |
| 7.053 | 7.278 | 7.369 | 7.140 | 6.955 | 6.660 |
| 5.368 | 5.741 | 5.333 | 6.357 | 6.166 | 6.940 |
| 6.565 | 6.896 | 6.601 | 6.679 | 6.418 | 5.771 |
| 7.830 | 8.273 | 8.021 | 8.199 | 8.324 | 7.171 |
| 3.889 | 3.801 | 3.382 | 4.334 | 4.104 | 6.929 |
| 3.861 | 3.931 | 4.188 | 3.481 | 4.214 | 4.447 |
| 4.969 | 4.643 | 3.984 | 3.879 | 4.063 | 3.955 |
| 3.853 | 3.426 | 3.506 | 3.717 | 3.633 | 3.138 |
| 1.333 | 1.855 | 1.978 | 1.687 | 1.830 | 2.048 |
| 4.607 | 4.617 | 4.821 | 4.157 | 4.398 | 2.345 |
| 4.457 | 4.978 | 4.876 | 4.681 | 4.466 | 4.068 |
| 3.742 | 3.347 | 2.892 | 3.050 | 2.944 | 2.969 |
| 3.507 | 2.551 | 3.686 | 2.896 | 2.739 | 3.271 |
| 3.484 | 3.598 | 3.883 | 3.488 | 3.675 | 2.876 |
| 4.292 | 4.294 | 4.679 | 3.945 | 4.115 | 3.349 |
| 5.859 | 5.136 | 4.703 | 4.219 | 4.884 | 5.516 |
| 2.631 | 2.907 | 1.815 | 1.855 | 2.078 | 3.404 |
| 3.416 | 3.392 | 3.441 | 2.982 | 3.641 | 3.178 |
| 5.008 | 4.965 | 4.613 | 4.465 | 4.724 | 5.279 |
| 6.266 | 6.242 | 6.202 | 5.314 | 5.635 | 6.043 |
| 7.214 | 7.138 | 7.134 | 6.935 | 7.288 | 8.213 |
| 4.238 | 3.424 | 3.754 | 4.130 | 4.002 | 2.910 |



|       |       |       |       |       |       |
|-------|-------|-------|-------|-------|-------|
| 3.531 | 5.406 | 4.473 | 4.192 | 4.093 | 4.635 |
| 4.056 | 3.441 | 3.828 | 3.791 | 3.037 | 3.504 |
| 2.607 | 2.431 | 2.246 | 2.072 | 2.670 | 2.157 |
| 1.832 | 2.815 | 2.426 | 1.559 | 1.826 | 2.351 |
| 6.860 | 6.915 | 7.342 | 7.077 | 7.116 | 7.221 |
| 2.490 | 1.907 | 2.080 | 1.529 | 1.625 | 2.274 |
| 3.339 | 2.757 | 3.562 | 2.920 | 3.341 | 2.233 |
| 3.652 | 3.134 | 2.500 | 3.953 | 3.222 | 1.656 |
| 4.316 | 3.856 | 3.971 | 4.356 | 4.505 | 6.256 |
| 3.974 | 3.468 | 3.926 | 3.744 | 4.086 | 4.867 |
| 4.811 | 4.347 | 4.659 | 4.726 | 4.626 | 5.472 |
| 4.043 | 4.154 | 4.166 | 4.368 | 4.166 | 3.546 |
| 4.146 | 4.376 | 4.427 | 4.678 | 4.471 | 3.767 |
| 4.328 | 4.203 | 4.229 | 4.555 | 4.440 | 3.797 |
| 4.110 | 4.295 | 4.291 | 4.596 | 4.607 | 3.782 |
| 3.619 | 3.844 | 3.985 | 4.168 | 4.197 | 4.156 |
| 4.951 | 4.263 | 4.497 | 4.624 | 4.523 | 4.860 |
| 1.728 | 2.813 | 2.249 | 2.471 | 2.695 | 3.106 |
| 6.508 | 6.399 | 6.729 | 6.378 | 6.412 | 5.323 |
| 5.858 | 5.541 | 5.695 | 5.324 | 5.957 | 6.746 |
| 7.025 | 7.336 | 7.130 | 6.938 | 7.117 | 6.294 |
| 7.936 | 7.737 | 7.695 | 7.543 | 7.508 | 6.116 |
| 5.249 | 4.915 | 5.158 | 4.560 | 4.645 | 3.949 |
| 7.016 | 7.177 | 7.219 | 7.140 | 7.271 | 6.467 |
| 6.656 | 7.296 | 7.121 | 6.777 | 7.056 | 6.359 |
| 7.783 | 7.962 | 8.143 | 8.284 | 8.270 | 6.371 |
| 3.958 | 4.560 | 4.317 | 4.384 | 4.580 | 4.328 |
| 4.321 | 4.993 | 4.788 | 4.075 | 4.840 | 4.574 |
| 3.167 | 3.224 | 3.431 | 3.453 | 3.679 | 3.608 |
| 3.266 | 4.280 | 3.601 | 3.783 | 3.687 | 4.453 |
| 6.035 | 6.127 | 6.356 | 6.432 | 6.980 | 8.065 |
| 4.463 | 4.490 | 4.540 | 4.372 | 3.875 | 4.212 |
| 3.675 | 4.161 | 3.641 | 3.722 | 3.949 | 5.013 |
| 2.852 | 3.063 | 3.099 | 3.012 | 3.412 | 2.648 |
| 2.937 | 3.123 | 3.057 | 3.080 | 4.193 | 5.110 |
| 5.549 | 5.128 | 5.111 | 5.798 | 5.457 | 6.535 |
| 6.146 | 6.087 | 5.896 | 6.038 | 6.258 | 6.185 |
| 3.206 | 3.710 | 3.054 | 2.960 | 3.472 | 2.449 |
| 4.324 | 4.529 | 5.046 | 4.371 | 4.805 | 4.008 |
| 4.238 | 3.452 | 2.915 | 4.038 | 3.648 | 3.462 |
| 7.184 | 7.503 | 7.160 | 7.041 | 6.873 | 5.642 |
| 9.350 | 9.112 | 9.418 | 9.401 | 9.683 | 8.996 |
| 6.762 | 6.497 | 6.834 | 6.512 | 7.760 | 8.664 |
| 8.364 | 8.367 | 8.519 | 8.342 | 8.212 | 7.138 |
| 2.592 | 2.765 | 2.939 | 2.690 | 2.891 | 3.065 |
| 3.792 | 2.469 | 1.709 | 2.377 | 3.228 | 1.628 |
| 1.693 | 1.814 | 2.079 | 1.589 | 3.010 | 1.830 |
| 5.049 | 5.249 | 4.943 | 4.381 | 4.794 | 4.771 |
| 7.056 | 6.710 | 5.945 | 6.235 | 6.550 | 7.873 |
| 6.036 | 6.084 | 6.417 | 6.030 | 5.514 | 4.588 |

|       |       |       |       |       |       |
|-------|-------|-------|-------|-------|-------|
| 3.177 | 4.285 | 2.930 | 3.458 | 4.113 | 4.141 |
| 3.280 | 3.917 | 4.208 | 3.759 | 3.258 | 1.436 |
| 3.786 | 4.166 | 4.130 | 3.775 | 3.904 | 3.841 |
| 3.631 | 4.169 | 3.702 | 3.079 | 3.172 | 4.197 |
| 2.150 | 2.313 | 1.957 | 2.058 | 1.931 | 2.856 |
| 3.837 | 4.163 | 4.035 | 3.999 | 3.824 | 3.046 |
| 4.195 | 4.530 | 4.567 | 4.416 | 4.732 | 5.464 |
| 2.460 | 2.121 | 2.540 | 2.867 | 2.453 | 2.921 |
| 2.491 | 2.090 | 2.012 | 1.964 | 1.888 | 2.247 |
| 2.658 | 3.274 | 2.225 | 2.258 | 1.190 | 3.458 |
| 6.790 | 6.587 | 6.714 | 7.044 | 7.023 | 7.931 |
| 1.836 | 2.660 | 2.114 | 1.501 | 2.423 | 2.183 |
| 2.337 | 2.374 | 3.199 | 2.709 | 2.745 | 3.100 |
| 6.508 | 6.031 | 5.921 | 6.597 | 6.101 | 5.216 |
| 5.124 | 5.359 | 5.359 | 5.374 | 5.397 | 4.984 |
| 3.505 | 2.794 | 3.200 | 2.243 | 2.361 | 2.802 |
| 7.598 | 8.092 | 7.862 | 7.908 | 7.901 | 6.780 |
| 3.400 | 3.043 | 3.606 | 2.783 | 2.824 | 2.819 |
| 4.182 | 3.027 | 3.950 | 3.478 | 3.225 | 3.680 |
| 3.276 | 3.042 | 2.892 | 3.083 | 3.832 | 3.276 |
| 5.416 | 6.018 | 5.680 | 5.618 | 5.860 | 3.763 |
| 2.969 | 3.328 | 2.996 | 2.483 | 2.338 | 2.146 |
| 1.626 | 1.833 | 1.777 | 1.219 | 1.592 | 1.983 |
| 2.988 | 2.916 | 4.059 | 2.335 | 2.828 | 3.026 |
| 3.143 | 2.915 | 2.836 | 3.058 | 2.594 | 2.828 |
| 3.013 | 3.611 | 3.452 | 3.703 | 3.434 | 3.583 |
| 2.431 | 2.626 | 2.635 | 2.258 | 3.252 | 2.946 |
| 2.487 | 2.777 | 2.119 | 2.871 | 2.740 | 2.858 |
| 3.045 | 2.483 | 3.108 | 2.130 | 2.948 | 2.585 |
| 4.258 | 4.440 | 4.754 | 3.789 | 4.420 | 5.397 |
| 1.714 | 2.044 | 1.888 | 1.345 | 1.808 | 2.352 |
| 5.224 | 5.000 | 5.513 | 5.428 | 5.070 | 3.430 |
| 1.236 | 1.813 | 1.487 | 1.902 | 1.712 | 1.369 |
| 0.820 | 3.163 | 2.963 | 3.875 | 2.792 | 2.507 |
| 4.026 | 6.327 | 5.142 | 6.532 | 4.422 | 5.436 |
| 1.730 | 2.210 | 2.327 | 1.976 | 2.351 | 1.969 |
| 2.872 | 2.436 | 2.731 | 2.766 | 3.169 | 3.237 |
| 6.607 | 6.742 | 6.848 | 6.704 | 6.775 | 3.117 |
| 3.966 | 4.027 | 4.829 | 4.949 | 4.315 | 2.113 |
| 5.155 | 4.262 | 4.293 | 4.259 | 3.982 | 3.950 |
| 5.553 | 5.224 | 4.656 | 5.739 | 5.711 | 6.999 |
| 3.888 | 3.267 | 3.856 | 3.773 | 3.107 | 2.112 |
| 2.452 | 3.070 | 3.341 | 2.952 | 4.594 | 3.079 |
| 5.220 | 5.004 | 5.309 | 4.842 | 5.672 | 6.198 |
| 6.728 | 6.934 | 6.983 | 6.789 | 6.856 | 6.121 |
| 4.887 | 5.331 | 5.371 | 4.824 | 5.038 | 4.308 |
| 4.353 | 4.714 | 4.923 | 4.144 | 4.476 | 3.750 |
| 8.962 | 9.538 | 9.278 | 9.250 | 9.231 | 7.833 |
| 4.737 | 4.842 | 4.324 | 3.688 | 3.998 | 5.205 |
| 4.831 | 4.463 | 5.141 | 4.148 | 4.767 | 4.537 |

|       |       |       |       |       |       |
|-------|-------|-------|-------|-------|-------|
| 3.385 | 3.088 | 2.758 | 2.543 | 2.872 | 2.927 |
| 5.352 | 5.138 | 5.376 | 5.482 | 5.504 | 5.323 |
| 4.298 | 4.620 | 4.625 | 4.611 | 4.518 | 5.670 |
| 2.961 | 3.152 | 3.115 | 4.339 | 3.907 | 4.687 |
| 3.163 | 2.429 | 3.376 | 1.903 | 2.541 | 3.403 |
| 4.060 | 3.584 | 3.559 | 4.462 | 4.404 | 5.131 |
| 4.611 | 4.840 | 4.743 | 4.515 | 4.549 | 5.084 |
| 3.300 | 3.301 | 2.413 | 3.715 | 3.851 | 5.052 |
| 3.627 | 3.680 | 4.208 | 3.728 | 4.125 | 4.662 |
| 2.885 | 3.573 | 2.875 | 3.048 | 2.406 | 4.255 |
| 7.271 | 6.935 | 6.819 | 7.473 | 7.034 | 6.379 |
| 6.835 | 6.468 | 6.628 | 6.743 | 6.437 | 5.683 |
| 2.686 | 2.703 | 2.734 | 2.462 | 2.930 | 2.825 |
| 4.969 | 4.704 | 4.403 | 4.371 | 4.666 | 4.131 |
| 4.721 | 4.513 | 4.946 | 4.215 | 4.968 | 5.836 |
| 3.820 | 4.507 | 4.011 | 3.756 | 4.042 | 3.483 |
| 5.153 | 5.030 | 5.529 | 4.904 | 5.253 | 4.661 |
| 4.019 | 4.673 | 4.382 | 4.154 | 4.580 | 4.340 |
| 5.226 | 5.780 | 5.940 | 5.083 | 5.378 | 4.369 |
| 4.149 | 3.392 | 4.090 | 4.023 | 3.957 | 3.183 |
| 2.251 | 2.937 | 2.979 | 2.930 | 2.642 | 3.981 |
| 4.712 | 4.932 | 4.796 | 3.926 | 4.794 | 2.917 |
| 5.569 | 5.859 | 5.633 | 5.489 | 5.935 | 3.998 |
| 3.023 | 3.519 | 3.123 | 2.768 | 3.297 | 2.160 |
| 6.482 | 6.904 | 6.234 | 6.951 | 7.163 | 8.220 |
| 4.086 | 4.365 | 3.921 | 3.508 | 3.596 | 4.164 |
| 2.859 | 3.309 | 3.134 | 3.642 | 3.863 | 4.678 |
| 6.093 | 5.684 | 5.876 | 6.064 | 5.933 | 7.056 |
| 1.534 | 1.557 | 2.638 | 2.768 | 2.897 | 4.900 |
| 5.790 | 6.232 | 6.075 | 5.833 | 6.056 | 4.830 |
| 6.364 | 7.107 | 6.907 | 6.597 | 6.844 | 6.278 |
| 5.595 | 5.436 | 5.557 | 5.551 | 5.634 | 4.748 |
| 5.223 | 4.813 | 4.849 | 4.400 | 4.467 | 4.000 |
| 6.672 | 7.102 | 6.865 | 7.030 | 6.652 | 5.578 |
| 4.293 | 3.744 | 3.973 | 3.655 | 3.985 | 5.225 |
| 3.134 | 3.335 | 2.585 | 3.530 | 2.682 | 3.879 |
| 2.036 | 2.493 | 1.982 | 1.897 | 2.279 | 2.880 |
| 4.837 | 5.797 | 5.232 | 5.534 | 5.078 | 5.772 |
| 5.391 | 5.362 | 5.059 | 5.478 | 4.835 | 4.348 |
| 3.151 | 2.983 | 3.089 | 2.389 | 3.440 | 3.263 |
| 2.257 | 2.823 | 3.153 | 2.888 | 2.729 | 3.277 |
| 8.751 | 8.267 | 8.659 | 8.950 | 8.848 | 5.727 |
| 4.632 | 4.361 | 4.180 | 4.266 | 4.090 | 3.219 |
| 4.225 | 4.634 | 4.551 | 4.787 | 4.984 | 6.566 |
| 5.693 | 5.644 | 5.708 | 5.071 | 5.411 | 4.507 |
| 3.806 | 2.892 | 3.463 | 3.420 | 3.773 | 3.419 |
| 4.583 | 4.959 | 3.918 | 3.861 | 4.425 | 3.779 |
| 5.663 | 5.868 | 6.152 | 5.413 | 5.479 | 6.047 |
| 5.870 | 5.961 | 5.788 | 5.880 | 5.910 | 5.137 |
| 4.882 | 5.087 | 4.746 | 4.932 | 4.799 | 5.273 |

|       |       |       |       |       |       |
|-------|-------|-------|-------|-------|-------|
| 7.866 | 7.993 | 7.857 | 8.246 | 7.995 | 6.534 |
| 2.191 | 2.026 | 1.602 | 1.721 | 1.742 | 3.519 |
| 4.638 | 5.344 | 4.453 | 4.598 | 4.838 | 4.193 |
| 2.867 | 3.290 | 3.573 | 3.575 | 2.915 | 3.994 |
| 3.636 | 3.866 | 4.741 | 3.582 | 4.544 | 3.653 |
| 8.306 | 8.350 | 8.383 | 8.227 | 8.040 | 6.564 |
| 8.368 | 8.247 | 8.325 | 8.126 | 8.047 | 7.065 |
| 8.386 | 8.227 | 8.548 | 8.457 | 8.632 | 7.490 |
| 5.254 | 5.156 | 5.551 | 5.557 | 5.568 | 4.216 |
| 3.006 | 2.294 | 2.112 | 3.185 | 2.746 | 2.492 |
| 3.190 | 2.354 | 1.482 | 3.579 | 3.697 | 3.987 |
| 5.175 | 5.231 | 5.165 | 5.779 | 5.766 | 6.861 |
| 4.023 | 4.494 | 4.726 | 4.046 | 4.377 | 3.168 |
| 5.639 | 5.996 | 5.905 | 5.751 | 5.943 | 5.032 |
| 8.035 | 8.343 | 8.018 | 8.001 | 8.300 | 7.254 |
| 4.544 | 3.850 | 3.835 | 4.111 | 4.151 | 5.411 |
| 6.448 | 6.900 | 6.515 | 6.616 | 6.766 | 6.309 |
| 6.461 | 6.157 | 6.635 | 6.551 | 6.343 | 6.099 |
| 3.510 | 3.225 | 3.320 | 4.005 | 3.686 | 3.417 |
| 3.678 | 3.799 | 3.190 | 3.268 | 3.494 | 3.339 |
| 4.082 | 3.611 | 3.935 | 3.966 | 3.655 | 4.116 |
| 2.914 | 2.351 | 2.549 | 2.546 | 2.230 | 2.177 |
| 6.868 | 6.752 | 6.676 | 6.940 | 6.919 | 5.526 |
| 2.089 | 2.473 | 2.279 | 2.631 | 2.334 | 1.912 |
| 4.741 | 4.473 | 4.951 | 4.222 | 4.533 | 5.140 |
| 3.403 | 3.295 | 3.152 | 3.409 | 3.446 | 3.442 |
| 5.087 | 5.618 | 5.229 | 5.507 | 5.136 | 4.736 |
| 5.467 | 6.291 | 5.736 | 5.878 | 5.706 | 4.663 |
| 5.485 | 5.768 | 5.532 | 5.474 | 5.100 | 5.214 |
| 2.582 | 2.360 | 2.582 | 2.503 | 2.904 | 2.740 |
| 3.903 | 3.990 | 4.206 | 4.288 | 4.030 | 2.913 |
| 4.848 | 4.586 | 4.751 | 4.616 | 4.451 | 5.173 |
| 7.044 | 6.656 | 6.819 | 6.752 | 6.536 | 5.801 |
| 6.302 | 6.431 | 6.570 | 6.421 | 6.552 | 5.162 |
| 4.730 | 4.875 | 4.800 | 4.524 | 4.512 | 1.750 |
| 5.012 | 5.780 | 5.248 | 5.164 | 5.370 | 5.042 |
| 2.973 | 3.071 | 3.133 | 3.479 | 2.762 | 4.360 |
| 5.130 | 5.308 | 4.779 | 5.261 | 5.157 | 6.268 |
| 7.589 | 7.756 | 7.605 | 7.880 | 7.807 | 8.044 |
| 4.039 | 4.102 | 3.949 | 4.791 | 4.861 | 5.950 |
| 3.341 | 3.348 | 3.282 | 3.704 | 3.636 | 5.363 |
| 3.804 | 3.053 | 3.675 | 3.850 | 3.378 | 6.998 |
| 5.194 | 4.471 | 4.496 | 5.043 | 4.215 | 5.214 |
| 3.806 | 2.661 | 3.355 | 4.030 | 3.472 | 3.980 |
| 4.631 | 4.835 | 5.087 | 5.266 | 5.500 | 4.584 |
| 4.895 | 5.471 | 2.594 | 2.790 | 3.344 | 2.867 |
| 3.337 | 1.436 | 2.570 | 3.908 | 3.468 | 2.283 |
| 6.738 | 1.474 | 6.498 | 6.599 | 6.738 | 1.384 |
| 5.117 | 5.020 | 5.105 | 5.256 | 5.426 | 6.071 |
| 6.418 | 6.644 | 6.531 | 7.191 | 7.334 | 8.618 |

|       |       |       |       |       |       |
|-------|-------|-------|-------|-------|-------|
| 7.286 | 6.966 | 6.918 | 7.099 | 7.050 | 7.055 |
| 3.068 | 2.379 | 2.910 | 1.895 | 2.105 | 1.537 |
| 2.038 | 2.451 | 2.132 | 2.305 | 3.041 | 2.237 |
| 2.214 | 2.548 | 2.093 | 2.099 | 2.045 | 2.611 |
| 4.758 | 4.670 | 4.616 | 4.428 | 4.049 | 2.918 |
| 2.342 | 1.632 | 2.310 | 1.893 | 1.922 | 2.216 |
| 7.056 | 7.719 | 7.163 | 6.634 | 6.963 | 7.193 |
| 4.144 | 5.242 | 4.731 | 3.961 | 4.341 | 5.343 |
| 4.853 | 4.499 | 3.887 | 4.610 | 4.002 | 4.544 |
| 7.290 | 7.188 | 7.587 | 7.270 | 7.237 | 6.281 |
| 5.364 | 4.583 | 4.575 | 3.870 | 4.863 | 3.463 |
| 4.906 | 5.519 | 5.088 | 4.679 | 5.311 | 4.322 |
| 6.895 | 6.797 | 6.886 | 6.900 | 6.980 | 5.125 |
| 4.315 | 4.544 | 4.033 | 4.340 | 4.581 | 3.812 |
| 3.809 | 2.881 | 4.097 | 3.520 | 3.252 | 4.663 |
| 5.549 | 1.692 | 5.212 | 5.580 | 5.362 | 1.537 |
| 5.217 | 1.913 | 4.925 | 5.394 | 5.134 | 1.549 |
| 5.833 | 6.181 | 6.007 | 5.703 | 5.960 | 5.625 |
| 8.357 | 7.299 | 6.906 | 7.678 | 7.679 | 8.961 |
| 4.258 | 4.307 | 4.464 | 4.187 | 4.311 | 4.841 |
| 3.761 | 4.389 | 3.958 | 4.178 | 4.258 | 3.730 |
| 2.251 | 3.432 | 2.509 | 3.870 | 3.887 | 4.535 |
| 7.458 | 7.641 | 7.774 | 6.412 | 7.067 | 8.095 |
| 2.590 | 2.817 | 2.817 | 3.250 | 2.931 | 2.546 |
| 4.794 | 4.645 | 5.117 | 4.963 | 4.805 | 4.231 |
| 2.872 | 2.569 | 2.533 | 3.056 | 3.158 | 2.169 |
| 4.641 | 4.217 | 4.087 | 4.477 | 4.652 | 5.578 |
| 6.178 | 5.900 | 6.110 | 6.075 | 6.005 | 5.152 |
| 3.704 | 4.493 | 3.769 | 3.948 | 4.052 | 4.883 |
| 3.608 | 4.116 | 3.816 | 3.806 | 4.005 | 5.244 |
| 5.897 | 5.240 | 5.899 | 5.774 | 6.352 | 5.418 |
| 5.624 | 5.327 | 5.209 | 5.159 | 5.396 | 5.512 |
| 6.120 | 6.051 | 5.300 | 5.998 | 5.578 | 7.298 |
| 6.241 | 6.043 | 5.978 | 6.170 | 6.208 | 5.686 |
| 6.258 | 6.852 | 6.579 | 6.590 | 6.078 | 5.408 |
| 6.969 | 7.239 | 6.956 | 7.095 | 7.208 | 5.982 |
| 3.203 | 2.043 | 3.610 | 3.439 | 2.382 | 2.748 |
| 7.201 | 7.450 | 7.299 | 6.966 | 7.384 | 4.833 |
| 5.238 | 5.538 | 5.465 | 5.203 | 5.629 | 3.358 |
| 4.986 | 4.930 | 4.969 | 4.858 | 5.170 | 4.014 |
| 1.732 | 2.834 | 1.420 | 2.085 | 2.758 | 2.526 |
| 7.018 | 7.455 | 7.459 | 7.471 | 7.416 | 7.017 |
| 4.127 | 3.759 | 4.103 | 4.020 | 3.737 | 3.451 |
| 8.183 | 8.104 | 8.152 | 7.775 | 8.143 | 7.383 |
| 8.004 | 8.041 | 8.069 | 8.031 | 8.041 | 7.463 |
| 3.509 | 3.956 | 3.887 | 3.692 | 3.706 | 3.759 |
| 5.143 | 4.695 | 5.267 | 4.811 | 4.906 | 4.661 |
| 3.038 | 3.050 | 3.576 | 3.070 | 3.102 | 3.190 |
| 5.545 | 5.651 | 5.513 | 5.504 | 5.547 | 4.672 |
| 7.756 | 7.576 | 7.805 | 7.699 | 7.795 | 7.106 |

|       |       |       |       |       |        |
|-------|-------|-------|-------|-------|--------|
| 5.327 | 5.986 | 5.509 | 5.485 | 5.518 | 4.942  |
| 3.814 | 2.960 | 3.324 | 3.955 | 3.823 | 3.519  |
| 2.643 | 3.334 | 3.321 | 1.731 | 2.452 | 3.708  |
| 6.323 | 6.279 | 6.151 | 6.784 | 6.738 | 6.986  |
| 6.271 | 6.545 | 6.625 | 6.181 | 6.454 | 5.221  |
| 3.507 | 2.153 | 2.708 | 2.993 | 2.784 | 4.226  |
| 4.918 | 4.654 | 4.996 | 5.302 | 4.703 | 3.961  |
| 7.205 | 8.124 | 7.942 | 8.540 | 8.491 | 10.514 |
| 7.022 | 7.532 | 6.962 | 6.857 | 7.177 | 6.000  |
| 5.890 | 5.623 | 5.780 | 5.504 | 5.299 | 4.471  |
| 3.843 | 3.395 | 3.518 | 4.356 | 3.684 | 3.951  |
| 3.801 | 4.785 | 4.371 | 4.655 | 5.095 | 5.955  |
| 2.021 | 2.458 | 2.409 | 3.624 | 2.395 | 2.469  |
| 4.306 | 4.859 | 4.622 | 4.657 | 5.214 | 6.159  |
| 8.299 | 8.045 | 8.187 | 8.286 | 8.222 | 5.196  |
| 7.837 | 8.187 | 7.856 | 7.761 | 8.121 | 5.040  |
| 2.890 | 2.904 | 3.245 | 3.318 | 3.360 | 4.271  |
| 6.050 | 5.881 | 5.933 | 5.682 | 5.767 | 2.532  |
| 5.633 | 5.399 | 5.805 | 5.323 | 5.292 | 6.862  |
| 5.296 | 5.156 | 5.404 | 5.526 | 5.610 | 6.419  |
| 2.617 | 1.995 | 2.327 | 2.635 | 2.413 | 2.845  |
| 6.357 | 6.453 | 6.512 | 6.343 | 6.664 | 3.644  |
| 7.207 | 6.859 | 7.168 | 7.284 | 7.013 | 5.947  |
| 7.911 | 7.607 | 7.796 | 7.969 | 7.731 | 6.459  |
| 3.013 | 4.019 | 3.695 | 3.566 | 3.640 | 4.178  |
| 3.457 | 3.801 | 3.916 | 4.255 | 3.811 | 4.289  |
| 6.130 | 6.775 | 6.817 | 6.520 | 6.307 | 5.342  |
| 4.592 | 4.458 | 4.406 | 4.213 | 3.639 | 3.277  |
| 3.669 | 4.644 | 4.292 | 4.340 | 4.083 | 4.140  |
| 4.694 | 3.984 | 4.302 | 4.196 | 4.225 | 3.913  |
| 8.974 | 9.334 | 9.175 | 9.224 | 9.285 | 8.409  |
| 4.885 | 5.019 | 5.430 | 5.189 | 5.232 | 4.016  |
| 4.336 | 4.730 | 4.316 | 4.522 | 4.748 | 4.112  |
| 6.538 | 7.296 | 7.159 | 6.797 | 6.952 | 6.487  |
| 2.328 | 2.035 | 2.042 | 2.627 | 2.383 | 3.982  |
| 8.058 | 8.533 | 8.271 | 8.284 | 8.353 | 7.298  |
| 5.462 | 4.523 | 4.475 | 4.420 | 4.735 | 4.589  |
| 5.543 | 4.620 | 4.556 | 4.520 | 4.724 | 4.560  |
| 5.397 | 4.431 | 4.433 | 4.197 | 4.529 | 4.236  |
| 5.367 | 4.612 | 4.666 | 4.482 | 4.394 | 4.717  |
| 7.459 | 7.270 | 7.282 | 7.505 | 7.438 | 6.296  |
| 4.569 | 4.538 | 4.775 | 4.844 | 4.714 | 3.165  |
| 5.244 | 4.776 | 4.963 | 5.350 | 4.672 | 4.423  |
| 7.539 | 8.154 | 7.859 | 7.875 | 7.985 | 7.865  |
| 5.212 | 3.555 | 4.151 | 4.368 | 4.158 | 3.141  |
| 6.388 | 6.735 | 6.736 | 6.933 | 6.579 | 6.076  |
| 4.487 | 4.820 | 4.777 | 5.090 | 4.822 | 5.986  |
| 3.673 | 4.111 | 3.707 | 4.043 | 4.233 | 2.827  |
| 6.508 | 6.410 | 5.802 | 6.220 | 6.202 | 6.939  |
| 6.987 | 6.733 | 6.531 | 7.078 | 7.161 | 8.522  |

|       |       |       |       |       |       |
|-------|-------|-------|-------|-------|-------|
| 7.134 | 2.122 | 7.021 | 7.269 | 7.148 | 2.233 |
| 3.046 | 2.893 | 3.422 | 3.291 | 3.414 | 2.949 |
| 5.652 | 5.971 | 6.065 | 5.693 | 5.640 | 5.154 |
| 6.297 | 6.242 | 5.956 | 6.186 | 6.356 | 7.453 |
| 1.527 | 1.354 | 1.315 | 1.467 | 1.669 | 1.553 |
| 4.842 | 0.535 | 4.260 | 4.962 | 4.453 | 0.891 |
| 4.176 | 3.742 | 3.580 | 4.136 | 3.296 | 4.136 |
| 8.327 | 8.814 | 8.208 | 8.303 | 8.773 | 8.430 |
| 8.542 | 8.155 | 8.536 | 8.482 | 8.439 | 7.811 |
| 6.807 | 6.988 | 6.696 | 7.196 | 7.098 | 8.090 |
| 6.906 | 7.203 | 6.800 | 6.799 | 6.900 | 6.301 |
| 4.881 | 4.465 | 5.022 | 4.347 | 4.260 | 4.902 |
| 3.660 | 3.878 | 4.205 | 3.387 | 3.362 | 4.611 |
| 4.333 | 4.298 | 3.898 | 4.297 | 4.059 | 5.579 |
| 4.384 | 5.008 | 4.778 | 4.817 | 5.137 | 5.814 |
| 5.032 | 4.998 | 4.913 | 4.833 | 5.167 | 5.500 |
| 5.799 | 5.639 | 5.636 | 5.295 | 5.709 | 7.050 |
| 7.163 | 7.838 | 7.575 | 7.608 | 7.818 | 8.328 |
| 3.503 | 4.385 | 4.438 | 3.475 | 3.904 | 4.715 |
| 3.001 | 3.185 | 2.735 | 3.042 | 3.498 | 2.757 |
| 2.314 | 2.405 | 2.515 | 2.405 | 3.308 | 2.677 |
| 5.474 | 3.612 | 3.142 | 4.583 | 4.558 | 5.294 |
| 5.943 | 5.334 | 5.621 | 6.259 | 5.805 | 7.612 |
| 1.198 | 1.132 | 0.767 | 1.048 | 1.244 | 1.203 |
| 6.714 | 6.071 | 5.888 | 6.153 | 6.072 | 6.062 |
| 6.813 | 7.167 | 7.316 | 7.285 | 7.064 | 6.427 |
| 4.610 | 4.914 | 4.623 | 4.628 | 4.624 | 4.109 |
| 3.447 | 3.767 | 3.234 | 3.708 | 3.310 | 3.221 |
| 9.025 | 9.273 | 9.130 | 9.254 | 9.125 | 8.676 |
| 4.963 | 4.308 | 4.837 | 4.581 | 4.988 | 4.005 |
| 2.689 | 3.433 | 3.894 | 2.671 | 2.961 | 3.195 |
| 5.297 | 5.589 | 5.684 | 5.794 | 5.765 | 6.684 |
| 4.506 | 5.395 | 5.486 | 4.779 | 5.522 | 4.086 |
| 2.443 | 2.354 | 2.594 | 2.458 | 2.245 | 2.883 |
| 5.942 | 5.567 | 5.714 | 5.336 | 5.561 | 5.874 |
| 4.277 | 4.257 | 4.725 | 3.769 | 3.883 | 4.771 |
| 5.390 | 4.576 | 4.934 | 5.326 | 5.679 | 2.765 |
| 4.839 | 5.361 | 5.197 | 5.088 | 5.314 | 2.529 |
| 3.230 | 4.057 | 3.979 | 4.094 | 3.905 | 5.126 |
| 2.351 | 2.031 | 2.202 | 2.061 | 2.289 | 2.180 |
| 4.321 | 4.551 | 4.561 | 4.815 | 4.342 | 4.572 |
| 2.410 | 1.740 | 1.848 | 2.306 | 1.639 | 1.511 |
| 2.636 | 1.672 | 2.111 | 2.772 | 2.391 | 1.849 |
| 6.351 | 6.252 | 6.155 | 6.242 | 6.390 | 5.798 |
| 7.229 | 6.992 | 7.139 | 7.251 | 7.046 | 5.806 |
| 4.295 | 4.737 | 4.687 | 4.754 | 4.893 | 4.268 |
| 5.565 | 6.358 | 5.961 | 5.749 | 5.808 | 5.402 |
| 9.189 | 9.569 | 9.573 | 9.303 | 9.445 | 8.637 |
| 6.857 | 6.662 | 7.094 | 7.143 | 6.772 | 6.218 |
| 2.887 | 2.334 | 2.645 | 2.555 | 2.932 | 3.036 |

|       |       |       |       |       |       |
|-------|-------|-------|-------|-------|-------|
| 4.109 | 3.949 | 3.844 | 3.965 | 3.983 | 3.519 |
| 3.010 | 3.291 | 3.137 | 4.116 | 3.502 | 5.155 |
| 3.070 | 4.130 | 2.688 | 3.380 | 2.941 | 2.016 |
| 5.901 | 5.361 | 6.503 | 4.607 | 5.025 | 5.687 |
| 4.097 | 4.230 | 4.483 | 4.100 | 4.303 | 2.266 |
| 8.547 | 8.374 | 8.280 | 8.098 | 8.306 | 4.615 |
| 5.822 | 5.797 | 5.392 | 5.535 | 5.482 | 2.083 |
| 6.621 | 6.573 | 6.811 | 6.357 | 6.973 | 6.033 |
| 6.343 | 6.202 | 6.559 | 6.019 | 6.405 | 5.262 |
| 3.136 | 3.562 | 3.327 | 3.066 | 3.698 | 2.762 |
| 2.181 | 2.084 | 2.586 | 2.676 | 2.375 | 2.586 |
| 7.349 | 7.502 | 7.604 | 7.437 | 7.516 | 6.776 |
| 4.378 | 3.028 | 4.365 | 4.454 | 2.391 | 4.870 |
| 2.109 | 1.160 | 1.673 | 1.550 | 1.840 | 1.586 |
| 4.016 | 3.091 | 3.565 | 2.447 | 2.827 | 4.315 |
| 4.073 | 2.562 | 3.140 | 2.673 | 2.735 | 3.625 |
| 4.345 | 5.052 | 4.613 | 3.957 | 4.846 | 5.526 |
| 4.625 | 3.929 | 4.594 | 4.889 | 4.311 | 4.373 |
| 4.967 | 5.236 | 5.820 | 4.876 | 5.319 | 5.492 |
| 1.550 | 1.442 | 1.382 | 1.522 | 1.394 | 2.076 |
| 3.578 | 3.879 | 3.966 | 4.540 | 4.302 | 2.514 |
| 3.699 | 3.353 | 3.837 | 3.855 | 3.679 | 3.135 |
| 3.959 | 3.524 | 4.067 | 4.122 | 3.836 | 3.333 |
| 5.519 | 5.553 | 5.898 | 5.817 | 5.949 | 4.202 |
| 4.554 | 4.969 | 5.455 | 5.126 | 5.410 | 2.593 |
| 5.463 | 5.990 | 5.880 | 5.497 | 5.522 | 5.990 |
| 5.020 | 5.246 | 5.477 | 5.626 | 5.355 | 5.030 |
| 4.149 | 4.104 | 4.483 | 3.069 | 3.796 | 4.588 |
| 7.847 | 7.919 | 7.836 | 7.715 | 7.573 | 5.954 |
| 7.735 | 7.651 | 7.603 | 7.424 | 7.593 | 8.865 |
| 2.488 | 2.466 | 3.048 | 3.174 | 3.055 | 3.061 |
| 4.905 | 5.871 | 4.502 | 6.288 | 5.902 | 6.327 |
| 4.742 | 5.527 | 5.192 | 5.517 | 5.129 | 6.052 |
| 8.140 | 8.761 | 8.423 | 8.378 | 8.386 | 7.429 |
| 2.957 | 2.619 | 1.956 | 2.886 | 2.052 | 1.841 |
| 7.071 | 6.859 | 6.843 | 7.080 | 7.139 | 7.417 |
| 2.834 | 2.421 | 2.544 | 3.030 | 3.025 | 3.435 |
| 6.110 | 5.884 | 5.998 | 5.550 | 5.769 | 5.962 |
| 7.011 | 7.396 | 7.383 | 7.202 | 7.317 | 4.234 |
| 5.911 | 5.826 | 6.095 | 6.273 | 5.955 | 7.402 |
| 4.626 | 5.472 | 4.989 | 4.713 | 5.018 | 5.547 |
| 2.581 | 2.614 | 2.842 | 2.361 | 2.556 | 3.967 |
| 3.735 | 4.410 | 4.386 | 4.068 | 4.399 | 3.735 |
| 6.160 | 6.086 | 6.294 | 6.278 | 6.205 | 7.696 |
| 3.606 | 3.626 | 3.061 | 3.437 | 2.938 | 4.316 |
| 3.963 | 3.745 | 3.971 | 3.893 | 4.019 | 2.947 |
| 7.720 | 7.671 | 7.464 | 7.640 | 7.853 | 6.451 |
| 6.494 | 6.346 | 6.646 | 6.768 | 6.526 | 6.127 |
| 5.963 | 6.584 | 6.405 | 6.138 | 6.329 | 5.828 |
| 6.892 | 6.976 | 6.839 | 7.006 | 6.949 | 6.584 |



|       |       |       |       |       |       |
|-------|-------|-------|-------|-------|-------|
| 7.143 | 7.086 | 7.006 | 6.802 | 6.971 | 5.931 |
| 1.962 | 1.747 | 2.319 | 1.691 | 1.690 | 2.648 |
| 8.337 | 8.599 | 8.540 | 8.519 | 8.579 | 7.234 |
| 5.168 | 4.754 | 4.926 | 4.790 | 4.966 | 7.614 |
| 4.289 | 3.775 | 4.289 | 4.536 | 4.023 | 4.362 |
| 4.859 | 4.767 | 4.836 | 4.654 | 4.917 | 3.774 |
| 3.675 | 4.268 | 4.309 | 4.311 | 4.346 | 4.999 |
| 3.070 | 3.348 | 2.517 | 2.582 | 2.740 | 2.629 |
| 1.824 | 2.083 | 2.352 | 2.048 | 2.288 | 1.950 |
| 8.223 | 8.399 | 8.392 | 8.105 | 8.261 | 7.549 |
| 2.899 | 2.579 | 2.955 | 2.729 | 2.665 | 2.389 |
| 5.166 | 4.873 | 5.242 | 5.133 | 4.978 | 4.971 |
| 3.251 | 3.620 | 3.361 | 3.314 | 3.324 | 3.427 |
| 2.977 | 2.142 | 2.594 | 2.363 | 2.668 | 2.860 |
| 5.253 | 5.397 | 5.616 | 5.373 | 5.876 | 3.674 |
| 3.412 | 3.723 | 2.963 | 4.096 | 4.021 | 4.077 |
| 5.811 | 5.949 | 5.986 | 6.165 | 5.561 | 3.485 |
| 3.508 | 3.584 | 3.905 | 3.881 | 3.612 | 5.307 |
| 6.700 | 6.315 | 6.652 | 6.493 | 6.414 | 5.881 |
| 6.426 | 6.190 | 6.254 | 6.134 | 5.974 | 4.160 |
| 5.673 | 6.336 | 6.041 | 6.113 | 6.277 | 6.720 |
| 1.918 | 1.901 | 1.701 | 2.132 | 2.231 | 2.358 |
| 6.060 | 6.204 | 6.062 | 5.941 | 6.329 | 7.043 |
| 7.955 | 7.920 | 7.736 | 8.021 | 8.128 | 8.749 |
| 5.974 | 5.888 | 6.032 | 5.764 | 5.968 | 5.499 |
| 4.826 | 5.082 | 4.944 | 4.864 | 4.828 | 4.502 |
| 4.569 | 4.702 | 4.924 | 4.591 | 4.402 | 3.030 |
| 4.158 | 4.310 | 4.033 | 4.291 | 3.577 | 3.039 |
| 3.010 | 2.999 | 2.985 | 2.633 | 2.670 | 2.967 |
| 4.022 | 3.576 | 3.863 | 3.721 | 3.691 | 4.049 |
| 2.606 | 3.380 | 3.368 | 2.965 | 2.970 | 2.227 |
| 8.077 | 7.788 | 7.777 | 8.547 | 8.328 | 9.520 |
| 4.644 | 4.799 | 4.690 | 5.127 | 4.957 | 5.733 |
| 4.149 | 4.208 | 3.969 | 3.685 | 3.607 | 3.024 |
| 5.599 | 5.559 | 5.414 | 5.224 | 5.268 | 5.857 |
| 4.103 | 3.324 | 3.443 | 3.563 | 3.704 | 4.676 |
| 5.768 | 5.878 | 6.923 | 6.187 | 7.189 | 6.280 |
| 6.199 | 6.341 | 6.225 | 5.517 | 6.063 | 5.679 |
| 1.435 | 1.927 | 1.951 | 1.983 | 1.737 | 2.877 |
| 1.910 | 1.743 | 1.719 | 1.727 | 1.560 | 3.472 |
| 0.994 | 9.007 | 1.357 | 1.278 | 1.495 | 9.677 |
| 5.425 | 5.263 | 5.741 | 5.398 | 5.265 | 3.910 |
| 5.320 | 6.249 | 5.834 | 5.552 | 5.865 | 4.249 |
| 6.042 | 6.407 | 6.567 | 6.152 | 6.721 | 5.596 |
| 4.268 | 4.212 | 4.516 | 4.692 | 4.638 | 3.981 |
| 4.155 | 3.051 | 3.555 | 4.324 | 3.705 | 3.846 |
| 2.673 | 2.643 | 3.273 | 2.266 | 2.976 | 1.573 |
| 2.128 | 2.469 | 2.628 | 2.511 | 2.521 | 2.674 |
| 3.776 | 3.044 | 4.001 | 3.564 | 3.579 | 2.595 |
| 4.963 | 5.611 | 5.375 | 5.860 | 5.571 | 6.308 |

|        |        |        |        |        |       |
|--------|--------|--------|--------|--------|-------|
| 7.979  | 8.048  | 7.877  | 7.840  | 8.036  | 7.547 |
| 4.068  | 4.585  | 4.679  | 4.380  | 4.672  | 4.760 |
| 3.520  | 3.936  | 4.090  | 3.536  | 3.513  | 2.670 |
| 4.922  | 4.488  | 4.670  | 4.815  | 4.721  | 4.691 |
| 4.251  | 4.172  | 4.412  | 4.603  | 4.050  | 4.275 |
| 1.889  | 2.956  | 2.391  | 2.659  | 2.254  | 2.717 |
| 4.234  | 4.289  | 2.986  | 4.979  | 3.592  | 4.927 |
| 3.413  | 3.912  | 4.004  | 3.193  | 3.193  | 3.390 |
| 4.094  | 3.099  | 3.358  | 3.997  | 3.344  | 3.467 |
| 1.954  | 1.820  | 1.963  | 1.244  | 2.235  | 3.384 |
| 5.322  | 4.766  | 4.692  | 4.793  | 4.691  | 5.307 |
| 5.248  | 5.094  | 5.416  | 5.271  | 5.141  | 4.765 |
| 7.450  | 7.558  | 7.645  | 7.381  | 7.417  | 8.375 |
| 5.147  | 4.497  | 3.906  | 4.764  | 5.414  | 4.473 |
| 3.100  | 2.507  | 2.383  | 1.568  | 2.474  | 1.987 |
| 4.859  | 5.616  | 5.149  | 5.574  | 5.737  | 5.626 |
| 4.213  | 4.477  | 4.374  | 4.359  | 4.287  | 4.819 |
| 6.817  | 6.945  | 7.018  | 7.025  | 7.206  | 6.814 |
| 7.734  | 7.999  | 7.891  | 7.635  | 7.991  | 7.433 |
| 5.201  | 4.789  | 4.513  | 4.924  | 5.123  | 3.796 |
| 3.607  | 4.058  | 3.526  | 3.511  | 3.761  | 2.733 |
| 3.591  | 2.954  | 2.673  | 2.375  | 2.792  | 3.060 |
| 2.115  | 3.049  | 2.769  | 3.199  | 2.515  | 2.388 |
| 3.703  | 4.384  | 3.939  | 3.898  | 3.862  | 3.238 |
| 4.546  | 4.396  | 4.884  | 3.988  | 4.350  | 3.091 |
| 8.050  | 7.789  | 8.185  | 8.160  | 8.023  | 7.144 |
| 4.598  | 5.135  | 4.949  | 4.772  | 4.391  | 3.630 |
| 6.931  | 7.016  | 6.922  | 6.537  | 6.942  | 6.323 |
| 7.408  | 7.656  | 7.470  | 7.383  | 7.238  | 6.715 |
| 10.335 | 10.387 | 10.284 | 10.415 | 10.503 | 9.109 |
| 5.717  | 5.281  | 5.392  | 5.402  | 5.392  | 4.431 |
| 3.150  | 2.800  | 2.829  | 3.503  | 2.704  | 3.166 |
| 6.304  | 6.418  | 6.083  | 6.162  | 6.105  | 5.766 |
| 5.077  | 5.216  | 4.872  | 4.662  | 4.824  | 5.332 |
| 5.197  | 4.687  | 5.140  | 5.415  | 4.841  | 1.552 |
| 3.932  | 3.819  | 4.301  | 4.040  | 4.181  | 4.311 |
| 4.172  | 4.519  | 4.723  | 4.379  | 4.837  | 2.621 |
| 2.949  | 2.723  | 2.873  | 3.331  | 2.588  | 3.445 |
| 3.132  | 1.968  | 2.162  | 3.748  | 2.723  | 4.003 |
| 5.849  | 5.861  | 5.664  | 5.804  | 5.749  | 5.978 |
| 7.247  | 7.067  | 7.040  | 7.029  | 7.151  | 5.823 |
| 5.681  | 5.439  | 5.311  | 5.796  | 5.797  | 7.244 |
| 4.464  | 4.555  | 3.977  | 4.440  | 3.772  | 3.507 |
| 5.480  | 6.311  | 6.100  | 6.178  | 6.064  | 5.935 |
| 5.248  | 5.450  | 5.793  | 5.137  | 5.343  | 4.691 |
| 5.156  | 5.197  | 5.100  | 5.382  | 5.588  | 6.558 |
| 4.320  | 4.573  | 4.668  | 4.991  | 4.506  | 4.633 |
| 4.196  | 2.900  | 3.673  | 3.600  | 2.606  | 4.096 |
| 7.362  | 7.462  | 7.355  | 7.374  | 7.080  | 6.974 |
| 5.445  | 5.853  | 5.597  | 5.643  | 5.557  | 5.209 |

|       |       |       |       |       |       |
|-------|-------|-------|-------|-------|-------|
| 3.987 | 4.467 | 4.160 | 3.901 | 3.588 | 4.198 |
| 4.058 | 3.556 | 3.450 | 3.579 | 3.890 | 2.950 |
| 3.765 | 4.156 | 3.997 | 4.409 | 4.364 | 3.464 |
| 7.025 | 7.282 | 7.177 | 7.173 | 7.037 | 6.349 |
| 3.554 | 3.539 | 3.257 | 3.248 | 3.839 | 3.415 |
| 6.138 | 6.164 | 6.399 | 6.041 | 6.172 | 4.906 |
| 5.708 | 5.275 | 5.789 | 5.700 | 4.855 | 4.808 |
| 5.808 | 5.948 | 6.653 | 5.888 | 5.973 | 7.210 |
| 4.823 | 5.730 | 5.839 | 5.191 | 5.859 | 4.365 |
| 5.849 | 5.859 | 6.346 | 6.137 | 6.077 | 7.170 |
| 3.662 | 3.913 | 3.985 | 4.276 | 3.944 | 4.740 |
| 6.758 | 7.100 | 6.849 | 7.078 | 6.845 | 5.744 |
| 3.423 | 3.266 | 3.958 | 3.160 | 3.297 | 3.671 |
| 3.449 | 3.617 | 3.462 | 2.210 | 3.609 | 3.436 |
| 4.713 | 5.382 | 5.298 | 5.152 | 5.122 | 4.501 |
| 6.050 | 5.792 | 5.826 | 5.847 | 5.742 | 7.016 |
| 6.126 | 6.373 | 6.509 | 6.573 | 6.312 | 7.482 |
| 3.377 | 3.406 | 3.135 | 3.775 | 3.923 | 4.699 |
| 7.206 | 7.630 | 7.306 | 7.330 | 7.432 | 6.731 |
| 5.112 | 4.406 | 5.150 | 4.752 | 4.940 | 4.174 |
| 4.739 | 5.087 | 5.233 | 4.624 | 4.319 | 2.418 |
| 3.615 | 3.040 | 3.908 | 3.652 | 3.759 | 2.531 |
| 7.273 | 7.814 | 7.844 | 8.112 | 8.247 | 9.137 |
| 2.143 | 2.569 | 2.289 | 2.282 | 2.587 | 2.722 |
| 8.026 | 8.355 | 8.118 | 7.886 | 8.036 | 7.018 |
| 5.569 | 6.083 | 5.501 | 5.786 | 5.734 | 4.840 |
| 6.725 | 6.543 | 6.317 | 6.441 | 6.560 | 7.200 |
| 4.832 | 4.846 | 5.070 | 4.817 | 5.322 | 5.939 |
| 6.621 | 6.869 | 6.782 | 6.581 | 6.830 | 5.889 |
| 4.250 | 3.997 | 4.854 | 4.541 | 4.703 | 4.821 |
| 3.749 | 4.886 | 4.620 | 4.459 | 4.754 | 4.254 |
| 9.045 | 7.010 | 7.059 | 6.196 | 8.007 | 6.670 |
| 4.187 | 3.436 | 3.461 | 3.492 | 3.461 | 4.554 |
| 6.853 | 5.175 | 5.012 | 4.871 | 6.057 | 5.994 |
| 5.172 | 6.098 | 5.472 | 5.543 | 5.482 | 3.978 |
| 5.395 | 5.671 | 5.333 | 5.569 | 5.349 | 4.979 |
| 4.391 | 3.898 | 3.928 | 4.530 | 4.287 | 3.057 |
| 3.588 | 4.090 | 4.181 | 3.536 | 4.173 | 2.348 |
| 3.350 | 1.963 | 3.867 | 3.782 | 3.385 | 1.180 |
| 6.079 | 6.033 | 6.456 | 6.987 | 6.861 | 7.921 |
| 3.596 | 3.254 | 2.655 | 2.626 | 2.611 | 3.203 |
| 3.200 | 3.580 | 3.142 | 2.912 | 3.251 | 2.599 |
| 7.553 | 7.719 | 7.586 | 7.734 | 7.574 | 6.288 |
| 5.601 | 4.743 | 4.651 | 5.603 | 5.661 | 6.220 |
| 6.092 | 4.564 | 5.101 | 4.710 | 6.057 | 4.724 |
| 4.769 | 4.055 | 3.793 | 3.900 | 4.425 | 3.756 |
| 5.014 | 5.365 | 4.635 | 5.058 | 5.070 | 4.385 |
| 3.582 | 4.519 | 4.451 | 4.215 | 4.599 | 3.951 |
| 5.123 | 5.414 | 5.232 | 5.391 | 5.413 | 5.080 |
| 3.831 | 4.854 | 4.388 | 4.985 | 4.333 | 4.446 |

|       |       |       |       |       |       |
|-------|-------|-------|-------|-------|-------|
| 5.272 | 4.969 | 5.198 | 5.680 | 5.501 | 7.399 |
| 7.778 | 7.906 | 7.743 | 7.747 | 7.800 | 7.282 |
| 6.673 | 6.381 | 6.330 | 6.643 | 6.701 | 5.231 |
| 5.726 | 5.918 | 5.747 | 5.350 | 5.519 | 5.905 |
| 2.217 | 2.217 | 1.977 | 2.146 | 2.476 | 1.524 |
| 2.291 | 2.330 | 2.323 | 2.658 | 2.711 | 3.304 |
| 7.050 | 6.355 | 6.760 | 6.787 | 6.631 | 6.554 |
| 5.509 | 5.475 | 5.163 | 5.469 | 5.887 | 5.675 |
| 3.817 | 4.094 | 4.317 | 4.367 | 3.890 | 4.325 |
| 4.607 | 4.341 | 4.726 | 5.050 | 3.832 | 5.130 |
| 3.827 | 4.176 | 3.918 | 4.021 | 4.091 | 4.372 |
| 5.772 | 6.222 | 6.094 | 5.797 | 6.237 | 5.633 |
| 6.274 | 6.208 | 6.341 | 6.083 | 6.466 | 6.634 |
| 4.563 | 4.653 | 4.179 | 4.129 | 5.123 | 5.336 |
| 3.596 | 4.032 | 3.371 | 4.084 | 3.651 | 2.659 |
| 4.849 | 4.664 | 4.698 | 4.765 | 5.101 | 4.030 |
| 5.116 | 4.735 | 4.896 | 5.021 | 4.946 | 4.638 |
| 6.682 | 6.296 | 6.710 | 6.360 | 6.170 | 5.470 |
| 3.340 | 3.325 | 3.344 | 2.693 | 3.118 | 3.571 |
| 6.046 | 5.842 | 5.734 | 6.193 | 5.962 | 5.911 |
| 4.507 | 3.902 | 4.525 | 4.303 | 4.662 | 4.309 |
| 3.706 | 3.687 | 3.561 | 3.418 | 4.093 | 4.011 |
| 4.317 | 4.916 | 4.599 | 4.186 | 4.358 | 1.808 |
| 2.995 | 2.414 | 3.874 | 1.343 | 2.433 | 4.167 |
| 2.580 | 2.375 | 3.354 | 2.578 | 2.638 | 1.586 |
| 3.406 | 3.825 | 3.418 | 3.513 | 3.624 | 3.685 |
| 2.667 | 3.363 | 3.530 | 2.895 | 3.051 | 3.117 |
| 4.787 | 5.027 | 4.400 | 4.276 | 4.522 | 4.023 |
| 4.225 | 4.365 | 3.932 | 4.611 | 4.503 | 4.527 |
| 3.354 | 4.073 | 3.749 | 4.146 | 3.680 | 3.332 |
| 4.781 | 5.447 | 5.350 | 5.293 | 5.411 | 5.248 |
| 3.394 | 5.077 | 4.342 | 4.154 | 4.829 | 4.560 |
| 3.651 | 4.027 | 4.969 | 4.319 | 4.716 | 4.448 |
| 2.415 | 4.133 | 4.284 | 3.376 | 4.117 | 2.544 |
| 2.783 | 4.121 | 3.374 | 2.894 | 3.398 | 2.692 |
| 2.137 | 2.087 | 2.764 | 3.154 | 2.726 | 1.898 |
| 4.221 | 4.352 | 4.339 | 4.522 | 4.509 | 4.400 |
| 2.834 | 3.323 | 4.099 | 3.156 | 3.009 | 3.211 |
| 6.250 | 6.026 | 6.328 | 6.551 | 6.317 | 5.888 |
| 8.408 | 8.910 | 8.474 | 8.768 | 8.681 | 7.544 |
| 4.436 | 5.218 | 4.917 | 4.546 | 4.606 | 4.062 |
| 4.603 | 4.542 | 4.398 | 4.247 | 4.295 | 4.610 |
| 4.507 | 4.930 | 4.054 | 4.584 | 4.213 | 3.893 |
| 2.873 | 3.203 | 3.623 | 3.130 | 3.019 | 3.584 |
| 3.860 | 4.340 | 3.754 | 4.151 | 4.090 | 4.794 |
| 5.461 | 6.134 | 5.988 | 5.648 | 5.982 | 4.858 |
| 6.181 | 5.941 | 6.019 | 6.189 | 5.887 | 5.750 |
| 5.196 | 4.759 | 5.157 | 4.310 | 4.482 | 5.322 |
| 2.104 | 3.035 | 2.170 | 2.734 | 2.610 | 2.237 |
| 3.282 | 2.505 | 2.792 | 3.462 | 3.382 | 3.737 |

|       |       |       |       |       |       |
|-------|-------|-------|-------|-------|-------|
| 4.042 | 4.816 | 4.923 | 4.619 | 4.369 | 4.250 |
| 3.023 | 3.298 | 3.173 | 3.173 | 3.173 | 3.767 |
| 3.334 | 3.575 | 3.379 | 3.428 | 3.863 | 4.460 |
| 2.435 | 3.050 | 3.396 | 2.725 | 2.970 | 3.479 |
| 5.620 | 5.815 | 6.166 | 5.782 | 5.941 | 5.632 |
| 4.777 | 5.389 | 5.032 | 4.724 | 4.618 | 4.407 |
| 1.665 | 2.052 | 1.812 | 1.997 | 2.038 | 2.367 |
| 4.765 | 4.380 | 4.047 | 4.491 | 4.380 | 4.409 |
| 4.745 | 5.077 | 4.665 | 4.772 | 4.898 | 4.794 |
| 2.640 | 3.721 | 3.323 | 3.867 | 2.989 | 2.700 |
| 6.226 | 5.729 | 6.199 | 6.205 | 6.293 | 6.762 |
| 3.907 | 4.487 | 4.171 | 4.365 | 4.596 | 4.194 |
| 3.397 | 3.653 | 3.756 | 3.248 | 3.806 | 2.201 |
| 3.826 | 3.788 | 3.571 | 3.863 | 3.972 | 4.562 |
| 2.342 | 3.202 | 2.266 | 2.704 | 3.092 | 1.631 |
| 3.669 | 4.359 | 4.730 | 4.374 | 4.275 | 4.625 |
| 2.444 | 2.981 | 2.921 | 2.456 | 3.156 | 3.242 |
| 3.382 | 3.323 | 3.624 | 3.713 | 3.147 | 2.267 |
| 5.981 | 6.743 | 6.235 | 6.032 | 6.431 | 5.511 |
| 4.924 | 4.614 | 4.943 | 5.197 | 5.015 | 4.462 |
| 4.425 | 5.409 | 4.680 | 4.124 | 4.938 | 4.938 |
| 6.233 | 6.539 | 6.234 | 5.987 | 6.344 | 6.636 |
| 5.521 | 5.218 | 5.845 | 5.763 | 5.831 | 2.812 |
| 2.770 | 2.595 | 3.023 | 2.856 | 2.816 | 3.633 |
| 4.004 | 3.619 | 4.203 | 4.348 | 3.869 | 3.636 |
| 3.557 | 4.095 | 4.412 | 3.886 | 4.208 | 3.934 |
| 4.747 | 4.991 | 5.001 | 4.888 | 4.836 | 6.061 |
| 3.332 | 4.011 | 2.918 | 4.195 | 3.018 | 3.554 |
| 4.897 | 5.126 | 5.576 | 4.959 | 5.560 | 6.035 |
| 4.035 | 4.090 | 4.090 | 4.353 | 4.330 | 4.760 |
| 3.636 | 3.707 | 4.123 | 4.268 | 4.252 | 3.710 |
| 5.376 | 5.632 | 5.999 | 5.541 | 5.234 | 5.623 |
| 6.079 | 6.345 | 6.537 | 6.298 | 6.415 | 5.856 |
| 4.145 | 5.061 | 4.462 | 5.083 | 4.831 | 4.728 |
| 5.317 | 5.192 | 5.903 | 5.010 | 5.674 | 5.044 |
| 4.892 | 5.834 | 5.450 | 5.688 | 5.774 | 4.638 |
| 3.933 | 4.784 | 4.494 | 3.895 | 4.888 | 3.835 |
| 3.309 | 2.808 | 2.338 | 2.900 | 2.588 | 2.439 |
| 4.594 | 5.180 | 4.419 | 5.240 | 5.381 | 4.507 |
| 6.330 | 5.799 | 6.554 | 6.458 | 5.884 | 6.394 |
| 5.245 | 5.937 | 5.411 | 5.272 | 5.587 | 4.596 |
| 3.818 | 4.506 | 4.066 | 3.819 | 3.973 | 3.374 |
| 5.539 | 5.445 | 5.293 | 6.047 | 5.476 | 7.023 |
| 4.806 | 5.717 | 5.767 | 5.762 | 5.822 | 4.816 |
| 3.396 | 2.387 | 2.387 | 2.224 | 2.716 | 2.193 |
| 3.869 | 4.310 | 4.796 | 4.953 | 4.964 | 5.294 |
| 6.805 | 6.852 | 6.618 | 6.479 | 6.469 | 5.563 |
| 2.123 | 3.418 | 3.464 | 3.418 | 3.917 | 3.942 |
| 4.912 | 5.027 | 4.803 | 5.050 | 4.806 | 4.305 |
| 3.223 | 3.238 | 3.832 | 3.588 | 3.854 | 4.521 |

|       |       |       |       |       |       |
|-------|-------|-------|-------|-------|-------|
| 2.762 | 3.381 | 1.916 | 3.797 | 4.135 | 4.094 |
| 3.363 | 3.312 | 3.470 | 2.876 | 3.481 | 3.402 |
| 5.496 | 5.687 | 5.620 | 5.733 | 5.697 | 5.183 |
| 6.770 | 6.683 | 6.802 | 6.829 | 6.763 | 6.723 |
| 5.244 | 4.759 | 4.840 | 5.028 | 5.074 | 6.205 |
| 5.713 | 5.329 | 5.306 | 4.941 | 5.221 | 4.731 |
| 5.019 | 5.740 | 5.102 | 5.359 | 4.781 | 3.616 |
| 4.537 | 5.024 | 5.254 | 5.392 | 5.132 | 6.075 |
| 2.723 | 2.843 | 3.081 | 3.460 | 3.261 | 2.837 |
| 2.178 | 2.827 | 3.202 | 2.558 | 2.451 | 2.461 |
| 5.097 | 5.894 | 5.545 | 5.995 | 6.351 | 7.646 |
| 3.848 | 4.296 | 4.415 | 4.522 | 4.353 | 4.001 |
| 5.362 | 4.632 | 5.035 | 5.413 | 4.763 | 4.632 |
| 3.935 | 4.107 | 4.709 | 3.994 | 3.204 | 4.125 |
| 4.344 | 5.115 | 4.792 | 5.214 | 5.333 | 4.346 |
| 3.767 | 4.843 | 4.340 | 4.772 | 4.595 | 4.409 |
| 4.375 | 4.803 | 4.622 | 4.737 | 4.460 | 3.549 |
| 2.842 | 2.933 | 2.762 | 3.068 | 1.923 | 2.535 |
| 4.012 | 4.973 | 4.393 | 4.737 | 4.763 | 3.845 |
| 3.704 | 4.131 | 4.263 | 4.099 | 4.291 | 3.981 |
| 3.310 | 3.970 | 3.954 | 3.229 | 2.584 | 3.123 |
| 2.135 | 3.016 | 2.550 | 2.597 | 2.250 | 3.371 |
| 3.580 | 4.200 | 4.479 | 3.731 | 3.897 | 4.200 |
| 4.215 | 4.371 | 3.578 | 4.442 | 4.190 | 3.843 |
| 3.399 | 4.061 | 3.775 | 3.798 | 3.318 | 3.207 |
| 4.527 | 4.751 | 4.390 | 4.683 | 5.114 | 4.366 |
| 3.251 | 4.021 | 3.700 | 4.052 | 4.372 | 3.891 |
| 4.985 | 4.607 | 5.191 | 5.122 | 5.287 | 5.273 |
| 1.613 | 2.102 | 2.453 | 2.891 | 3.014 | 3.072 |
| 5.419 | 6.036 | 5.674 | 5.356 | 5.723 | 5.397 |
| 4.923 | 5.570 | 5.343 | 5.165 | 5.504 | 5.355 |
| 4.045 | 4.981 | 4.474 | 4.695 | 4.286 | 4.420 |
| 4.076 | 3.608 | 4.090 | 4.291 | 4.799 | 3.741 |
| 4.722 | 5.003 | 4.625 | 4.594 | 4.886 | 4.072 |
| 2.896 | 2.829 | 3.227 | 3.627 | 2.818 | 2.498 |
| 3.626 | 4.382 | 3.661 | 3.814 | 4.177 | 4.189 |
| 4.276 | 4.805 | 4.002 | 4.550 | 4.452 | 4.098 |
| 5.080 | 4.069 | 4.206 | 5.071 | 4.366 | 5.496 |
| 4.196 | 4.571 | 4.314 | 4.504 | 4.590 | 5.088 |
| 5.984 | 6.388 | 6.229 | 6.689 | 6.650 | 7.573 |
| 5.394 | 5.877 | 5.658 | 6.175 | 5.875 | 5.015 |
| 4.683 | 5.376 | 5.312 | 5.143 | 5.266 | 4.526 |
| 7.539 | 7.826 | 8.147 | 7.669 | 8.114 | 7.512 |
| 4.209 | 4.408 | 4.538 | 4.493 | 4.154 | 3.617 |
| 3.879 | 3.534 | 3.742 | 3.654 | 4.161 | 3.451 |
| 3.419 | 3.941 | 3.996 | 2.986 | 3.860 | 2.150 |
| 4.676 | 4.496 | 4.885 | 5.024 | 4.973 | 3.241 |
| 3.208 | 3.385 | 3.902 | 3.299 | 3.601 | 2.559 |
| 2.219 | 2.390 | 2.386 | 2.281 | 2.328 | 3.402 |
| 2.630 | 2.851 | 3.090 | 2.983 | 2.636 | 3.586 |

|       |       |       |       |       |       |
|-------|-------|-------|-------|-------|-------|
| 4.366 | 4.315 | 3.790 | 3.854 | 3.863 | 3.576 |
| 3.482 | 4.389 | 3.975 | 4.437 | 4.615 | 4.110 |
| 4.223 | 4.176 | 4.310 | 2.750 | 3.779 | 2.173 |
| 4.854 | 4.739 | 4.113 | 4.649 | 4.014 | 4.799 |
| 2.669 | 2.686 | 2.863 | 2.950 | 2.267 | 2.975 |
| 5.395 | 5.995 | 5.791 | 5.544 | 5.750 | 4.522 |
| 3.649 | 3.798 | 2.708 | 2.697 | 3.763 | 4.097 |
| 4.401 | 4.034 | 4.366 | 4.684 | 4.186 | 4.729 |
| 4.864 | 5.108 | 4.820 | 5.248 | 5.022 | 5.318 |
| 2.974 | 3.232 | 3.092 | 2.749 | 3.588 | 3.320 |
| 4.883 | 4.519 | 4.461 | 4.226 | 4.871 | 5.258 |
| 3.996 | 3.331 | 3.274 | 2.337 | 2.988 | 2.721 |
| 4.024 | 3.221 | 3.245 | 4.007 | 3.616 | 2.948 |
| 3.729 | 3.308 | 3.420 | 3.745 | 3.962 | 3.803 |
| 3.284 | 3.880 | 3.507 | 3.733 | 3.283 | 2.654 |
| 7.189 | 7.062 | 7.057 | 7.264 | 6.995 | 6.089 |
| 3.206 | 3.507 | 2.945 | 3.081 | 3.341 | 2.454 |
| 4.456 | 4.794 | 4.141 | 4.684 | 4.859 | 3.789 |
| 5.840 | 5.914 | 5.785 | 5.952 | 5.771 | 5.189 |
| 4.301 | 4.807 | 4.920 | 5.154 | 4.574 | 4.643 |
| 6.201 | 6.037 | 6.276 | 6.283 | 6.318 | 6.093 |
| 4.152 | 3.494 | 4.343 | 4.164 | 4.164 | 3.962 |
| 5.052 | 5.407 | 4.932 | 5.197 | 5.719 | 6.131 |
| 5.002 | 5.143 | 5.427 | 6.297 | 5.821 | 4.522 |
| 3.794 | 4.454 | 4.423 | 4.145 | 3.439 | 3.139 |
| 3.544 | 3.143 | 3.470 | 3.726 | 2.735 | 3.857 |
| 3.394 | 2.734 | 3.300 | 3.337 | 3.696 | 3.676 |
| 6.835 | 6.993 | 6.615 | 6.839 | 6.968 | 6.622 |
| 4.878 | 4.891 | 5.431 | 4.785 | 5.435 | 2.734 |
| 5.143 | 5.445 | 5.302 | 5.459 | 5.963 | 3.247 |
| 2.937 | 1.795 | 2.650 | 2.443 | 1.394 | 2.883 |
| 4.032 | 3.949 | 3.790 | 4.156 | 4.029 | 4.139 |
| 3.760 | 4.222 | 3.565 | 4.133 | 4.105 | 3.559 |
| 4.886 | 5.576 | 4.981 | 5.240 | 5.336 | 4.038 |
| 2.347 | 3.868 | 4.133 | 3.859 | 3.843 | 4.082 |
| 2.130 | 2.570 | 2.822 | 2.997 | 2.581 | 2.326 |
| 4.872 | 4.708 | 4.601 | 5.284 | 4.999 | 5.727 |
| 4.140 | 4.230 | 3.890 | 3.774 | 3.435 | 2.067 |
| 4.248 | 4.022 | 4.038 | 4.447 | 3.936 | 3.887 |
| 4.786 | 5.416 | 5.281 | 5.248 | 5.316 | 4.994 |
| 2.165 | 2.190 | 2.071 | 2.088 | 2.122 | 1.757 |
| 4.201 | 4.114 | 4.817 | 4.344 | 4.385 | 4.498 |
| 3.173 | 3.751 | 3.842 | 3.129 | 3.958 | 4.566 |
| 2.889 | 3.054 | 4.002 | 3.759 | 3.028 | 2.888 |
| 6.333 | 6.025 | 6.124 | 6.263 | 6.370 | 5.490 |
| 3.864 | 4.211 | 3.688 | 3.858 | 4.129 | 3.839 |
| 4.359 | 4.460 | 4.078 | 4.169 | 3.708 | 4.006 |
| 4.048 | 3.725 | 4.316 | 4.813 | 4.312 | 4.438 |
| 3.697 | 4.305 | 3.739 | 3.580 | 3.432 | 4.223 |
| 3.990 | 4.045 | 3.889 | 4.484 | 4.239 | 4.194 |

|       |       |       |       |       |       |
|-------|-------|-------|-------|-------|-------|
| 3.109 | 3.981 | 3.335 | 3.650 | 3.794 | 3.211 |
| 3.380 | 2.977 | 2.022 | 3.281 | 3.585 | 4.529 |
| 2.975 | 2.990 | 3.025 | 3.034 | 2.914 | 2.737 |
| 3.944 | 3.048 | 3.555 | 3.796 | 3.789 | 2.765 |
| 3.870 | 4.043 | 3.616 | 4.622 | 4.060 | 4.604 |
| 3.975 | 3.832 | 4.004 | 3.816 | 3.809 | 4.416 |
| 3.702 | 3.861 | 4.121 | 3.932 | 4.223 | 3.536 |
| 3.055 | 3.501 | 3.407 | 3.395 | 3.685 | 3.990 |
| 4.588 | 4.948 | 5.013 | 4.794 | 4.611 | 4.597 |
| 3.851 | 4.473 | 4.566 | 4.469 | 4.368 | 3.032 |
| 4.186 | 3.600 | 4.166 | 4.607 | 4.209 | 4.218 |
| 6.324 | 5.886 | 6.533 | 6.305 | 6.530 | 6.501 |
| 8.843 | 9.110 | 8.908 | 8.764 | 8.983 | 7.758 |



| 14.CTL.FC.F | 15.CTL.FC.M | 16.CTL.FC.M | 17.CTL.FC.M | 18.CTL.FC.M | s.post | s.unscaled |
|-------------|-------------|-------------|-------------|-------------|--------|------------|
| 4.245       | 4.286       | 3.635       | 3.760       | 2.663       | 0.506  | 0.606      |
| 7.770       | 6.741       | 7.752       | 6.303       | 7.967       | 0.503  | 0.606      |
| 4.578       | 4.290       | 5.237       | 3.450       | 4.219       | 0.458  | 0.606      |
| 3.175       | 1.924       | 2.667       | 2.789       | 2.859       | 0.459  | 0.606      |
| 5.492       | 6.417       | 5.335       | 6.595       | 6.010       | 0.447  | 0.606      |
| 3.667       | 4.047       | 4.074       | 3.719       | 4.529       | 0.420  | 0.606      |
| 4.508       | 4.789       | 3.991       | 4.941       | 5.368       | 0.357  | 0.606      |
| 7.588       | 7.928       | 6.613       | 8.038       | 8.182       | 0.406  | 0.606      |
| 6.174       | 6.356       | 5.707       | 6.726       | 6.770       | 0.370  | 0.606      |
| 7.028       | 6.387       | 7.292       | 5.739       | 6.078       | 0.466  | 0.606      |
| 6.615       | 5.833       | 7.114       | 5.644       | 5.314       | 0.444  | 0.606      |
| 5.795       | 4.750       | 6.109       | 4.674       | 4.714       | 0.612  | 0.606      |
| 2.614       | 2.003       | 1.224       | 2.853       | 2.866       | 0.447  | 0.606      |
| 2.103       | 1.832       | 3.358       | 3.034       | 3.176       | 0.495  | 0.606      |
| 9.724       | 8.961       | 10.335      | 7.900       | 7.800       | 0.548  | 0.606      |
| 7.002       | 6.448       | 6.210       | 6.904       | 7.038       | 0.404  | 0.606      |
| 6.818       | 5.879       | 7.584       | 3.764       | 4.175       | 1.083  | 0.606      |
| 7.707       | 6.633       | 9.304       | 5.423       | 5.870       | 0.747  | 0.606      |
| 6.089       | 4.334       | 5.436       | 4.316       | 5.733       | 0.611  | 0.606      |
| 5.645       | 5.080       | 5.261       | 5.149       | 5.269       | 0.353  | 0.606      |
| 2.238       | 1.572       | 2.147       | 1.679       | 1.851       | 0.404  | 0.606      |
| 3.742       | 2.030       | 1.921       | 1.779       | 1.640       | 0.862  | 0.606      |
| 5.006       | 4.636       | 5.466       | 4.045       | 4.929       | 0.470  | 0.606      |
| 6.841       | 6.436       | 6.510       | 7.055       | 6.680       | 0.362  | 0.606      |
| 4.441       | 4.813       | 4.185       | 4.784       | 5.088       | 0.466  | 0.606      |
| 5.347       | 6.828       | 6.654       | 5.630       | 5.739       | 0.552  | 0.606      |
| 5.466       | 5.486       | 3.293       | 6.158       | 6.681       | 0.691  | 0.606      |
| 4.531       | 4.766       | 5.129       | 4.460       | 3.772       | 0.377  | 0.606      |
| 5.396       | 5.904       | 6.715       | 5.899       | 5.640       | 0.391  | 0.606      |
| 6.388       | 5.022       | 5.707       | 5.383       | 6.264       | 0.553  | 0.606      |
| 4.914       | 5.520       | 3.185       | 5.658       | 5.363       | 0.618  | 0.606      |
| 2.556       | 3.853       | 3.345       | 3.922       | 4.233       | 0.517  | 0.606      |
| 5.679       | 6.235       | 5.699       | 6.317       | 6.303       | 0.320  | 0.606      |
| 3.532       | 3.721       | 4.170       | 3.492       | 3.584       | 0.466  | 0.606      |
| 1.506       | 2.494       | 2.042       | 1.838       | 1.947       | 0.354  | 0.606      |
| 2.922       | 2.845       | 2.676       | 1.998       | 2.398       | 0.425  | 0.606      |
| 6.660       | 6.710       | 7.866       | 5.955       | 6.307       | 0.475  | 0.606      |
| 4.643       | 4.452       | 5.550       | 4.310       | 4.370       | 0.457  | 0.606      |
| 5.054       | 5.472       | 6.463       | 4.760       | 5.129       | 0.516  | 0.606      |
| 5.010       | 4.380       | 5.869       | 3.993       | 4.436       | 0.450  | 0.606      |
| 5.701       | 7.057       | 4.753       | 7.175       | 6.912       | 0.602  | 0.606      |
| 4.222       | 4.757       | 4.731       | 3.127       | 4.320       | 0.581  | 0.606      |
| 3.991       | 3.822       | 5.936       | 3.842       | 4.441       | 0.667  | 0.606      |
| 7.422       | 7.129       | 7.940       | 6.785       | 6.820       | 0.336  | 0.606      |
| 6.231       | 6.005       | 3.828       | 6.478       | 6.474       | 0.635  | 0.606      |
| 6.700       | 5.670       | 5.208       | 5.769       | 5.875       | 0.426  | 0.606      |
| 3.137       | 3.427       | 2.534       | 3.895       | 4.031       | 0.492  | 0.606      |
| 4.401       | 4.388       | 4.307       | 4.501       | 4.840       | 0.387  | 0.606      |
| 3.499       | 4.221       | 3.972       | 4.222       | 4.132       | 0.393  | 0.606      |

|       |       |       |       |       |       |       |
|-------|-------|-------|-------|-------|-------|-------|
| 6.794 | 4.157 | 6.277 | 4.541 | 4.544 | 0.657 | 0.606 |
| 5.274 | 3.955 | 4.670 | 3.922 | 4.625 | 0.471 | 0.606 |
| 3.800 | 3.926 | 5.158 | 3.352 | 4.037 | 0.479 | 0.606 |
| 2.226 | 2.241 | 2.692 | 2.640 | 2.163 | 0.430 | 0.606 |
| 3.030 | 4.349 | 3.861 | 4.223 | 3.796 | 0.514 | 0.606 |
| 3.872 | 2.086 | 2.087 | 3.294 | 4.350 | 0.538 | 0.606 |
| 5.761 | 5.124 | 6.240 | 5.052 | 5.059 | 0.421 | 0.606 |
| 2.453 | 1.773 | 3.398 | 1.964 | 1.570 | 0.538 | 0.606 |
| 1.228 | 1.921 | 1.777 | 1.976 | 1.406 | 0.577 | 0.606 |
| 6.045 | 3.793 | 3.301 | 4.394 | 4.103 | 0.818 | 0.606 |
| 3.168 | 3.344 | 2.821 | 3.575 | 3.684 | 0.470 | 0.606 |
| 4.111 | 5.098 | 4.484 | 4.597 | 4.182 | 0.443 | 0.606 |
| 3.652 | 3.250 | 4.820 | 3.491 | 3.367 | 0.424 | 0.606 |
| 2.521 | 2.749 | 2.858 | 3.030 | 2.984 | 0.432 | 0.606 |
| 4.431 | 4.423 | 5.673 | 4.127 | 3.444 | 0.569 | 0.606 |
| 2.025 | 3.139 | 1.771 | 2.931 | 3.008 | 0.470 | 0.606 |
| 1.858 | 1.414 | 2.283 | 1.272 | 1.587 | 0.506 | 0.606 |
| 2.900 | 2.249 | 3.216 | 3.011 | 3.386 | 0.451 | 0.606 |
| 5.809 | 4.899 | 4.641 | 5.236 | 5.935 | 0.583 | 0.606 |
| 4.041 | 3.629 | 4.469 | 3.576 | 3.593 | 0.469 | 0.606 |
| 3.798 | 2.867 | 3.502 | 3.035 | 2.532 | 0.482 | 0.606 |
| 3.462 | 3.290 | 3.830 | 2.856 | 2.991 | 0.460 | 0.606 |
| 2.313 | 1.964 | 2.553 | 2.582 | 1.692 | 0.450 | 0.606 |
| 3.093 | 0.998 | 5.435 | 1.227 | 0.613 | 1.176 | 0.606 |
| 3.039 | 2.573 | 2.698 | 3.099 | 3.470 | 0.464 | 0.606 |
| 2.305 | 1.904 | 2.242 | 1.835 | 2.307 | 0.399 | 0.606 |
| 3.360 | 3.797 | 3.054 | 3.729 | 2.829 | 0.425 | 0.606 |
| 2.320 | 2.407 | 2.272 | 3.669 | 3.293 | 0.517 | 0.606 |
| 1.886 | 1.410 | 1.712 | 1.521 | 2.597 | 0.390 | 0.606 |
| 3.612 | 3.114 | 2.616 | 3.383 | 4.368 | 0.451 | 0.606 |
| 2.242 | 1.224 | 3.573 | 1.720 | 2.044 | 0.797 | 0.606 |
| 2.991 | 4.973 | 3.116 | 4.257 | 4.855 | 0.593 | 0.606 |
| 3.745 | 3.097 | 2.423 | 3.484 | 3.797 | 0.440 | 0.606 |
| 3.145 | 2.570 | 4.049 | 2.822 | 2.816 | 0.465 | 0.606 |
| 1.545 | 2.990 | 1.825 | 3.505 | 2.916 | 0.479 | 0.606 |
| 3.324 | 2.043 | 4.005 | 1.374 | 1.648 | 0.718 | 0.606 |
| 6.185 | 5.308 | 6.284 | 4.473 | 4.757 | 0.536 | 0.606 |
| 4.212 | 3.542 | 3.433 | 4.287 | 3.335 | 0.440 | 0.606 |
| 1.860 | 1.873 | 1.664 | 2.224 | 2.513 | 0.456 | 0.606 |
| 3.335 | 3.433 | 2.274 | 3.267 | 2.984 | 0.429 | 0.606 |
| 2.197 | 2.147 | 2.521 | 2.433 | 2.902 | 0.498 | 0.606 |
| 3.067 | 2.290 | 3.439 | 1.831 | 1.808 | 0.456 | 0.606 |
| 4.860 | 2.406 | 4.492 | 2.947 | 2.112 | 0.872 | 0.606 |
| 1.979 | 2.453 | 2.145 | 2.797 | 2.373 | 0.411 | 0.606 |
| 2.341 | 3.362 | 3.632 | 2.019 | 2.214 | 0.541 | 0.606 |
| 0.457 | 4.422 | 2.481 | 2.603 | 2.178 | 0.956 | 0.606 |
| 2.931 | 3.032 | 3.227 | 3.821 | 3.482 | 0.428 | 0.606 |
| 1.847 | 3.960 | 3.005 | 4.252 | 4.088 | 0.610 | 0.606 |
| 2.163 | 2.868 | 1.624 | 4.007 | 2.630 | 0.476 | 0.606 |
| 1.087 | 3.812 | 1.492 | 4.095 | 4.445 | 0.845 | 0.606 |

|       |       |       |       |       |       |       |
|-------|-------|-------|-------|-------|-------|-------|
| 3.423 | 4.133 | 3.890 | 3.477 | 3.701 | 0.436 | 0.606 |
| 1.709 | 2.650 | 2.184 | 1.946 | 1.984 | 0.448 | 0.606 |
| 3.590 | 3.505 | 4.597 | 2.971 | 3.471 | 0.413 | 0.606 |
| 2.573 | 2.286 | 2.573 | 2.573 | 3.833 | 0.490 | 0.606 |
| 2.935 | 2.728 | 2.659 | 2.858 | 2.754 | 0.506 | 0.606 |
| 3.245 | 3.857 | 4.073 | 3.831 | 2.580 | 0.501 | 0.606 |
| 3.674 | 4.107 | 2.716 | 4.296 | 4.156 | 0.473 | 0.606 |
| 3.024 | 2.543 | 3.628 | 2.814 | 2.093 | 0.423 | 0.606 |
| 1.969 | 2.815 | 2.428 | 2.018 | 2.480 | 0.392 | 0.606 |
| 2.766 | 3.564 | 1.585 | 4.366 | 3.388 | 0.522 | 0.606 |
| 3.162 | 2.390 | 1.691 | 2.402 | 2.458 | 0.393 | 0.606 |
| 2.916 | 2.234 | 2.215 | 3.163 | 2.798 | 0.395 | 0.606 |
| 0.607 | 2.160 | 0.798 | 2.574 | 1.844 | 0.475 | 0.606 |
| 5.305 | 5.907 | 4.851 | 6.354 | 6.327 | 0.543 | 0.606 |
| 2.975 | 1.814 | 3.446 | 1.957 | 1.611 | 0.535 | 0.606 |
| 5.461 | 4.258 | 4.405 | 3.769 | 3.986 | 0.586 | 0.606 |
| 3.435 | 2.793 | 3.497 | 3.619 | 3.218 | 0.433 | 0.606 |
| 2.342 | 2.654 | 3.100 | 3.033 | 2.917 | 0.488 | 0.606 |
| 2.371 | 2.341 | 1.889 | 2.256 | 3.651 | 0.418 | 0.606 |
| 1.277 | 4.371 | 0.838 | 3.561 | 3.775 | 0.765 | 0.606 |
| 3.083 | 1.968 | 2.228 | 1.896 | 2.146 | 0.479 | 0.606 |
| 5.224 | 5.196 | 6.052 | 5.831 | 5.976 | 0.335 | 0.606 |
| 3.242 | 2.886 | 4.499 | 2.793 | 2.800 | 0.508 | 0.606 |
| 6.228 | 5.270 | 6.872 | 5.821 | 5.342 | 0.402 | 0.606 |
| 1.376 | 2.570 | 1.691 | 3.396 | 3.494 | 0.562 | 0.606 |
| 2.072 | 2.599 | 2.688 | 2.626 | 1.831 | 0.416 | 0.606 |
| 2.016 | 2.068 | 1.774 | 2.269 | 3.078 | 0.485 | 0.606 |
| 3.992 | 2.132 | 1.948 | 2.487 | 2.317 | 0.886 | 0.606 |
| 2.962 | 4.103 | 2.859 | 3.325 | 2.442 | 0.454 | 0.606 |
| 1.137 | 2.559 | 0.920 | 3.104 | 2.588 | 0.566 | 0.606 |
| 2.521 | 3.055 | 2.475 | 2.662 | 2.779 | 0.503 | 0.606 |
| 2.297 | 2.530 | 1.460 | 2.844 | 2.280 | 0.503 | 0.606 |
| 4.845 | 4.661 | 3.305 | 5.148 | 5.100 | 0.555 | 0.606 |
| 2.484 | 4.038 | 3.411 | 4.401 | 3.622 | 0.525 | 0.606 |
| 1.445 | 2.382 | 3.453 | 2.816 | 1.832 | 0.670 | 0.606 |
| 3.846 | 3.392 | 4.616 | 3.195 | 3.647 | 0.464 | 0.606 |
| 1.352 | 2.425 | 6.266 | 2.433 | 2.673 | 1.012 | 0.606 |
| 6.727 | 5.489 | 5.442 | 6.359 | 5.955 | 0.611 | 0.606 |
| 4.098 | 2.924 | 3.205 | 3.090 | 2.570 | 0.545 | 0.606 |
| 5.578 | 4.947 | 5.730 | 4.557 | 4.785 | 0.393 | 0.606 |
| 2.414 | 2.141 | 1.898 | 1.239 | 1.721 | 0.464 | 0.606 |
| 4.097 | 4.618 | 4.218 | 5.147 | 5.596 | 0.523 | 0.606 |
| 6.284 | 5.332 | 5.556 | 5.606 | 5.720 | 0.489 | 0.606 |
| 6.974 | 6.300 | 6.227 | 6.987 | 7.240 | 0.467 | 0.606 |
| 4.278 | 3.613 | 3.656 | 3.137 | 3.254 | 0.368 | 0.606 |
| 4.157 | 4.993 | 3.916 | 4.155 | 4.780 | 0.439 | 0.606 |
| 6.487 | 4.544 | 4.018 | 4.514 | 4.390 | 0.577 | 0.606 |
| 3.970 | 4.733 | 3.329 | 4.343 | 5.565 | 0.623 | 0.606 |
| 3.026 | 3.600 | 3.441 | 3.367 | 3.640 | 0.470 | 0.606 |
| 9.237 | 8.097 | 7.211 | 7.837 | 8.020 | 0.465 | 0.606 |

|       |       |       |       |       |       |       |
|-------|-------|-------|-------|-------|-------|-------|
| 4.297 | 5.371 | 4.137 | 5.055 | 5.502 | 0.437 | 0.606 |
| 4.335 | 3.579 | 3.632 | 3.718 | 3.868 | 0.412 | 0.606 |
| 2.189 | 1.921 | 2.529 | 2.092 | 2.219 | 0.434 | 0.606 |
| 2.764 | 3.581 | 4.287 | 2.203 | 2.707 | 0.757 | 0.606 |
| 5.494 | 4.657 | 5.146 | 4.293 | 4.773 | 0.462 | 0.606 |
| 3.709 | 3.478 | 3.331 | 3.164 | 3.804 | 0.346 | 0.606 |
| 7.091 | 7.001 | 8.099 | 5.674 | 5.731 | 0.633 | 0.606 |
| 7.683 | 7.770 | 6.956 | 7.962 | 7.609 | 0.346 | 0.606 |
| 2.456 | 2.374 | 1.911 | 3.178 | 3.072 | 0.431 | 0.606 |
| 5.071 | 5.428 | 5.303 | 4.591 | 6.209 | 0.426 | 0.606 |
| 3.946 | 3.724 | 2.408 | 4.189 | 4.571 | 0.501 | 0.606 |
| 3.874 | 3.946 | 4.031 | 3.319 | 3.732 | 0.460 | 0.606 |
| 5.708 | 5.342 | 6.197 | 5.694 | 5.470 | 0.401 | 0.606 |
| 5.226 | 5.805 | 5.914 | 5.980 | 6.256 | 0.415 | 0.606 |
| 2.255 | 3.457 | 1.881 | 2.801 | 3.081 | 0.481 | 0.606 |
| 2.545 | 3.468 | 3.133 | 2.672 | 2.987 | 0.655 | 0.606 |
| 3.284 | 4.195 | 2.730 | 4.212 | 4.519 | 0.458 | 0.606 |
| 4.080 | 3.681 | 5.103 | 3.423 | 3.473 | 0.420 | 0.606 |
| 4.982 | 5.824 | 3.329 | 5.698 | 5.938 | 0.661 | 0.606 |
| 3.256 | 4.649 | 2.924 | 4.920 | 4.470 | 0.646 | 0.606 |
| 6.242 | 6.614 | 6.574 | 6.359 | 6.134 | 0.552 | 0.606 |
| 6.713 | 6.307 | 6.282 | 6.650 | 6.613 | 0.340 | 0.606 |
| 6.313 | 6.867 | 5.443 | 6.466 | 6.514 | 0.400 | 0.606 |
| 5.868 | 6.283 | 4.836 | 6.952 | 6.951 | 0.573 | 0.606 |
| 5.605 | 5.668 | 5.742 | 5.957 | 6.191 | 0.330 | 0.606 |
| 3.307 | 2.983 | 3.406 | 4.252 | 3.894 | 0.412 | 0.606 |
| 4.957 | 6.057 | 4.605 | 6.025 | 5.823 | 0.440 | 0.606 |
| 4.211 | 5.225 | 5.155 | 5.851 | 5.892 | 0.497 | 0.606 |
| 4.725 | 5.283 | 4.395 | 5.413 | 5.484 | 0.347 | 0.606 |
| 3.436 | 3.649 | 3.091 | 2.533 | 3.498 | 0.421 | 0.606 |
| 5.122 | 3.714 | 4.058 | 3.991 | 3.537 | 0.749 | 0.606 |
| 5.027 | 4.782 | 6.132 | 4.746 | 4.740 | 0.427 | 0.606 |
| 4.709 | 5.851 | 3.324 | 6.061 | 6.053 | 0.624 | 0.606 |
| 3.944 | 3.199 | 3.697 | 3.599 | 3.155 | 0.428 | 0.606 |
| 4.203 | 4.040 | 4.738 | 3.200 | 3.746 | 0.409 | 0.606 |
| 4.398 | 4.621 | 4.429 | 5.098 | 5.154 | 0.363 | 0.606 |
| 4.062 | 3.941 | 4.114 | 3.721 | 4.242 | 0.451 | 0.606 |
| 5.192 | 4.689 | 4.565 | 4.809 | 4.984 | 0.518 | 0.606 |
| 7.251 | 7.827 | 6.643 | 8.096 | 8.197 | 0.412 | 0.606 |
| 8.123 | 8.247 | 5.459 | 8.926 | 9.058 | 0.799 | 0.606 |
| 6.468 | 5.446 | 6.583 | 4.093 | 4.968 | 0.734 | 0.606 |
| 3.375 | 1.855 | 3.262 | 3.227 | 3.095 | 0.507 | 0.606 |
| 2.426 | 2.629 | 2.864 | 2.201 | 2.485 | 0.374 | 0.606 |
| 5.676 | 5.740 | 5.525 | 4.754 | 5.093 | 0.486 | 0.606 |
| 3.061 | 1.742 | 3.927 | 1.610 | 1.977 | 0.638 | 0.606 |
| 2.498 | 3.050 | 3.388 | 1.762 | 2.669 | 0.507 | 0.606 |
| 1.528 | 2.127 | 2.184 | 2.078 | 2.569 | 0.672 | 0.606 |
| 1.589 | 2.345 | 2.134 | 3.639 | 2.999 | 0.511 | 0.606 |
| 3.115 | 3.521 | 2.989 | 4.301 | 3.655 | 0.483 | 0.606 |
| 5.125 | 1.188 | 6.524 | 2.073 | 1.984 | 1.209 | 0.606 |

|       |       |       |       |       |       |       |
|-------|-------|-------|-------|-------|-------|-------|
| 3.055 | 3.038 | 3.457 | 3.857 | 2.881 | 0.428 | 0.606 |
| 3.469 | 3.513 | 1.850 | 4.038 | 3.189 | 0.548 | 0.606 |
| 2.009 | 3.289 | 2.326 | 3.995 | 3.866 | 0.591 | 0.606 |
| 5.886 | 5.624 | 6.911 | 3.598 | 4.110 | 0.744 | 0.606 |
| 3.573 | 2.578 | 2.647 | 3.017 | 3.301 | 0.385 | 0.606 |
| 3.312 | 2.690 | 2.742 | 2.708 | 2.716 | 0.544 | 0.606 |
| 4.239 | 4.900 | 3.364 | 5.379 | 4.723 | 0.494 | 0.606 |
| 5.557 | 7.145 | 6.226 | 5.291 | 5.581 | 0.591 | 0.606 |
| 3.952 | 4.560 | 3.936 | 4.683 | 5.038 | 0.544 | 0.606 |
| 4.644 | 4.046 | 3.672 | 4.254 | 3.629 | 0.411 | 0.606 |
| 4.502 | 3.876 | 5.866 | 4.062 | 4.560 | 0.534 | 0.606 |
| 1.728 | 2.418 | 2.487 | 1.724 | 1.991 | 0.562 | 0.606 |
| 2.206 | 3.036 | 3.050 | 2.612 | 2.737 | 0.437 | 0.606 |
| 5.475 | 5.212 | 5.865 | 4.421 | 4.998 | 0.553 | 0.606 |
| 5.593 | 5.769 | 4.585 | 6.146 | 6.031 | 0.427 | 0.606 |
| 1.954 | 1.568 | 1.817 | 1.631 | 1.554 | 0.477 | 0.606 |
| 3.644 | 3.381 | 3.190 | 3.709 | 4.010 | 0.404 | 0.606 |
| 6.819 | 9.150 | 5.169 | 9.121 | 8.988 | 0.875 | 0.606 |
| 4.653 | 4.307 | 5.699 | 3.708 | 4.121 | 0.440 | 0.606 |
| 4.813 | 4.091 | 5.213 | 4.364 | 3.996 | 0.461 | 0.606 |
| 6.816 | 6.129 | 5.852 | 6.420 | 6.111 | 0.426 | 0.606 |
| 5.062 | 5.757 | 4.597 | 5.896 | 5.715 | 0.485 | 0.606 |
| 4.326 | 3.658 | 2.014 | 3.650 | 3.415 | 0.685 | 0.606 |
| 7.253 | 6.257 | 5.634 | 6.538 | 6.341 | 0.483 | 0.606 |
| 6.658 | 7.040 | 3.705 | 7.523 | 7.357 | 0.741 | 0.606 |
| 2.228 | 2.931 | 2.606 | 3.270 | 2.433 | 0.484 | 0.606 |
| 1.869 | 1.828 | 2.674 | 2.323 | 1.639 | 0.750 | 0.606 |
| 5.862 | 5.166 | 7.000 | 4.934 | 4.865 | 0.477 | 0.606 |
| 4.453 | 4.860 | 4.619 | 4.221 | 4.736 | 0.380 | 0.606 |
| 3.924 | 5.436 | 4.319 | 4.801 | 3.355 | 0.701 | 0.606 |
| 4.619 | 4.257 | 4.233 | 4.310 | 4.573 | 0.433 | 0.606 |
| 3.370 | 5.192 | 3.775 | 5.106 | 4.208 | 0.481 | 0.606 |
| 4.635 | 4.961 | 5.496 | 3.715 | 4.721 | 0.564 | 0.606 |
| 4.313 | 4.714 | 2.967 | 5.060 | 5.213 | 0.534 | 0.606 |
| 3.581 | 4.236 | 2.276 | 4.871 | 4.420 | 0.574 | 0.606 |
| 3.819 | 4.000 | 2.403 | 3.651 | 3.244 | 0.484 | 0.606 |
| 3.797 | 3.689 | 2.302 | 4.015 | 3.182 | 0.527 | 0.606 |
| 2.800 | 3.627 | 2.007 | 3.768 | 2.798 | 0.542 | 0.606 |
| 4.174 | 5.897 | 3.829 | 6.611 | 6.373 | 0.674 | 0.606 |
| 6.259 | 6.997 | 6.069 | 7.235 | 7.087 | 0.386 | 0.606 |
| 7.452 | 8.431 | 6.199 | 8.365 | 8.578 | 0.548 | 0.606 |
| 4.172 | 3.827 | 4.494 | 4.039 | 3.874 | 0.360 | 0.606 |
| 3.831 | 3.280 | 3.586 | 2.605 | 2.915 | 0.475 | 0.606 |
| 3.107 | 3.441 | 3.742 | 3.588 | 2.699 | 0.416 | 0.606 |
| 9.187 | 9.600 | 8.369 | 9.606 | 9.618 | 0.413 | 0.606 |
| 4.067 | 3.651 | 3.687 | 3.225 | 3.892 | 0.527 | 0.606 |
| 4.244 | 3.112 | 3.121 | 3.789 | 3.396 | 0.523 | 0.606 |
| 3.395 | 2.840 | 2.781 | 2.984 | 2.758 | 0.483 | 0.606 |
| 3.855 | 3.576 | 4.325 | 5.132 | 4.464 | 0.481 | 0.606 |
| 6.891 | 6.670 | 4.119 | 7.194 | 6.931 | 0.843 | 0.606 |

|       |       |       |       |       |       |       |
|-------|-------|-------|-------|-------|-------|-------|
| 5.656 | 5.950 | 4.857 | 6.373 | 6.328 | 0.406 | 0.606 |
| 4.139 | 4.558 | 5.522 | 3.685 | 3.941 | 0.416 | 0.606 |
| 7.183 | 7.657 | 7.283 | 7.965 | 7.754 | 0.327 | 0.606 |
| 5.125 | 4.483 | 5.503 | 4.139 | 4.752 | 0.489 | 0.606 |
| 3.933 | 2.476 | 4.029 | 3.571 | 2.675 | 0.471 | 0.606 |
| 5.498 | 7.851 | 3.722 | 8.127 | 7.848 | 0.944 | 0.606 |
| 2.672 | 3.821 | 2.766 | 3.213 | 3.639 | 0.414 | 0.606 |
| 6.674 | 5.707 | 6.607 | 5.196 | 5.981 | 0.480 | 0.606 |
| 2.729 | 2.757 | 2.253 | 3.286 | 3.183 | 0.411 | 0.606 |
| 4.217 | 4.792 | 2.462 | 5.315 | 5.489 | 0.605 | 0.606 |
| 2.139 | 1.460 | 1.374 | 2.543 | 2.500 | 0.454 | 0.606 |
| 5.536 | 5.710 | 5.650 | 5.463 | 5.603 | 0.434 | 0.606 |
| 6.983 | 7.188 | 7.352 | 7.299 | 7.685 | 0.292 | 0.606 |
| 5.326 | 5.777 | 5.053 | 6.071 | 6.078 | 0.351 | 0.606 |
| 5.725 | 5.835 | 5.420 | 5.693 | 6.477 | 0.406 | 0.606 |
| 3.423 | 3.499 | 2.742 | 3.515 | 4.010 | 0.411 | 0.606 |
| 3.289 | 2.048 | 4.145 | 1.422 | 1.484 | 0.621 | 0.606 |
| 7.295 | 6.627 | 7.532 | 5.977 | 5.560 | 0.589 | 0.606 |
| 5.782 | 4.598 | 6.054 | 4.199 | 3.660 | 0.629 | 0.606 |
| 7.228 | 6.551 | 7.228 | 6.055 | 6.647 | 0.462 | 0.606 |
| 4.159 | 4.290 | 5.383 | 2.667 | 3.625 | 0.545 | 0.606 |
| 6.287 | 5.921 | 6.742 | 6.006 | 6.645 | 0.432 | 0.606 |
| 7.603 | 6.018 | 3.390 | 6.292 | 6.344 | 0.815 | 0.606 |
| 6.152 | 6.990 | 7.780 | 6.453 | 6.737 | 0.467 | 0.606 |
| 5.037 | 4.285 | 5.158 | 4.303 | 4.546 | 0.418 | 0.606 |
| 5.230 | 6.560 | 5.969 | 3.877 | 5.259 | 0.802 | 0.606 |
| 5.554 | 6.932 | 6.372 | 3.762 | 5.726 | 0.900 | 0.606 |
| 5.602 | 6.971 | 6.340 | 3.765 | 5.643 | 0.879 | 0.606 |
| 3.891 | 3.879 | 4.143 | 2.927 | 2.413 | 0.469 | 0.606 |
| 5.274 | 4.513 | 4.372 | 5.177 | 4.834 | 0.461 | 0.606 |
| 1.756 | 1.964 | 1.972 | 1.205 | 2.018 | 0.456 | 0.606 |
| 1.393 | 3.589 | 1.075 | 3.993 | 3.592 | 0.696 | 0.606 |
| 1.495 | 2.497 | 1.141 | 2.695 | 2.390 | 0.551 | 0.606 |
| 6.468 | 7.072 | 6.494 | 7.401 | 7.162 | 0.516 | 0.606 |
| 7.877 | 8.970 | 8.763 | 9.238 | 9.193 | 0.519 | 0.606 |
| 7.984 | 8.218 | 8.003 | 8.625 | 8.700 | 0.320 | 0.606 |
| 6.862 | 6.250 | 3.960 | 6.575 | 6.320 | 0.647 | 0.606 |
| 2.735 | 2.495 | 3.695 | 2.634 | 2.421 | 0.429 | 0.606 |
| 2.295 | 4.652 | 1.415 | 5.643 | 5.461 | 0.922 | 0.606 |
| 4.270 | 3.996 | 4.385 | 3.385 | 3.736 | 0.427 | 0.606 |
| 3.741 | 2.174 | 2.627 | 3.708 | 3.413 | 0.487 | 0.606 |
| 3.735 | 3.579 | 3.712 | 3.962 | 3.756 | 0.466 | 0.606 |
| 2.215 | 2.693 | 2.356 | 2.585 | 1.830 | 0.433 | 0.606 |
| 7.783 | 8.118 | 7.855 | 8.216 | 8.316 | 0.358 | 0.606 |
| 3.838 | 2.669 | 3.070 | 3.598 | 2.949 | 0.510 | 0.606 |
| 3.182 | 2.386 | 1.323 | 3.448 | 2.760 | 0.578 | 0.606 |
| 5.265 | 4.413 | 5.247 | 4.419 | 4.193 | 0.350 | 0.606 |
| 6.202 | 6.598 | 5.492 | 6.335 | 6.433 | 0.370 | 0.606 |
| 3.138 | 2.958 | 4.275 | 2.030 | 4.999 | 1.021 | 0.606 |
| 7.129 | 6.184 | 7.821 | 6.034 | 6.058 | 0.467 | 0.606 |

|       |       |       |       |       |       |       |
|-------|-------|-------|-------|-------|-------|-------|
| 7.277 | 6.430 | 7.669 | 5.648 | 6.574 | 0.529 | 0.606 |
| 4.902 | 4.507 | 4.251 | 4.457 | 5.017 | 0.460 | 0.606 |
| 4.070 | 3.424 | 3.339 | 3.352 | 2.820 | 0.480 | 0.606 |
| 3.752 | 2.621 | 2.144 | 2.755 | 2.476 | 0.456 | 0.606 |
| 6.803 | 6.641 | 7.314 | 5.865 | 6.705 | 0.390 | 0.606 |
| 4.688 | 5.072 | 4.389 | 4.775 | 5.408 | 0.484 | 0.606 |
| 4.388 | 3.835 | 3.543 | 4.136 | 4.867 | 0.407 | 0.606 |
| 2.289 | 2.721 | 3.195 | 3.610 | 3.575 | 0.503 | 0.606 |
| 2.658 | 2.344 | 2.168 | 2.049 | 2.239 | 0.609 | 0.606 |
| 4.758 | 4.811 | 4.557 | 5.372 | 5.251 | 0.367 | 0.606 |
| 2.912 | 1.957 | 3.472 | 1.732 | 1.822 | 0.535 | 0.606 |
| 1.592 | 3.117 | 1.263 | 2.433 | 3.272 | 0.563 | 0.606 |
| 3.930 | 3.067 | 2.615 | 3.736 | 3.281 | 0.403 | 0.606 |
| 2.266 | 3.131 | 2.210 | 3.164 | 2.967 | 0.824 | 0.606 |
| 4.683 | 5.115 | 5.141 | 2.902 | 4.526 | 0.698 | 0.606 |
| 6.433 | 6.974 | 7.942 | 4.968 | 6.072 | 0.778 | 0.606 |
| 3.413 | 4.039 | 4.900 | 2.243 | 3.559 | 0.649 | 0.606 |
| 4.970 | 5.417 | 5.211 | 4.928 | 5.815 | 0.467 | 0.606 |
| 5.716 | 6.197 | 5.597 | 6.434 | 6.323 | 0.317 | 0.606 |
| 3.742 | 2.208 | 3.716 | 2.126 | 1.885 | 0.510 | 0.606 |
| 1.980 | 2.385 | 3.193 | 2.707 | 2.309 | 0.457 | 0.606 |
| 2.826 | 2.814 | 2.814 | 3.385 | 3.619 | 0.445 | 0.606 |
| 6.515 | 7.012 | 8.194 | 6.104 | 6.299 | 0.463 | 0.606 |
| 3.632 | 4.472 | 2.578 | 3.853 | 3.380 | 0.441 | 0.606 |
| 2.311 | 1.769 | 2.120 | 1.595 | 2.440 | 0.471 | 0.606 |
| 6.201 | 6.614 | 3.714 | 6.313 | 6.748 | 0.719 | 0.606 |
| 2.212 | 2.253 | 2.370 | 3.694 | 3.241 | 0.449 | 0.606 |
| 5.918 | 6.653 | 6.654 | 6.550 | 6.847 | 0.319 | 0.606 |
| 4.519 | 4.866 | 5.718 | 3.661 | 3.944 | 0.461 | 0.606 |
| 7.053 | 8.121 | 4.430 | 8.615 | 8.407 | 0.964 | 0.606 |
| 3.288 | 3.855 | 4.587 | 3.084 | 3.960 | 0.473 | 0.606 |
| 5.182 | 5.627 | 5.245 | 5.618 | 5.733 | 0.335 | 0.606 |
| 3.138 | 2.321 | 2.227 | 2.190 | 2.407 | 0.505 | 0.606 |
| 3.837 | 4.191 | 3.661 | 3.175 | 3.510 | 0.466 | 0.606 |
| 5.263 | 5.671 | 5.972 | 5.764 | 5.626 | 0.346 | 0.606 |
| 3.575 | 2.536 | 4.260 | 2.598 | 2.812 | 0.564 | 0.606 |
| 5.588 | 6.917 | 5.899 | 6.306 | 5.897 | 0.710 | 0.606 |
| 1.701 | 2.619 | 3.556 | 2.897 | 3.588 | 0.488 | 0.606 |
| 5.246 | 5.838 | 5.544 | 3.683 | 4.151 | 0.562 | 0.606 |
| 4.904 | 6.628 | 6.929 | 6.103 | 4.912 | 0.731 | 0.606 |
| 3.106 | 3.351 | 3.453 | 3.481 | 3.135 | 0.505 | 0.606 |
| 6.165 | 5.220 | 2.789 | 5.440 | 5.642 | 0.787 | 0.606 |
| 9.293 | 9.326 | 9.071 | 9.455 | 9.338 | 0.297 | 0.606 |
| 8.465 | 8.205 | 7.989 | 8.276 | 8.467 | 0.356 | 0.606 |
| 3.788 | 2.936 | 2.212 | 2.667 | 3.679 | 0.463 | 0.606 |
| 5.907 | 4.209 | 4.702 | 4.389 | 4.683 | 0.504 | 0.606 |
| 7.293 | 6.870 | 7.561 | 6.770 | 6.790 | 0.320 | 0.606 |
| 2.348 | 2.658 | 2.569 | 2.357 | 2.496 | 0.439 | 0.606 |
| 5.424 | 6.147 | 5.354 | 6.097 | 6.285 | 0.377 | 0.606 |
| 6.459 | 5.724 | 7.079 | 5.579 | 5.706 | 0.469 | 0.606 |

|       |       |        |       |       |       |       |
|-------|-------|--------|-------|-------|-------|-------|
| 6.296 | 5.518 | 6.852  | 5.066 | 5.468 | 0.609 | 0.606 |
| 6.540 | 5.915 | 7.139  | 5.469 | 5.655 | 0.435 | 0.606 |
| 6.504 | 7.004 | 6.837  | 6.978 | 7.070 | 0.325 | 0.606 |
| 6.002 | 6.260 | 5.933  | 6.301 | 6.298 | 0.334 | 0.606 |
| 4.393 | 4.167 | 2.839  | 4.413 | 4.956 | 0.650 | 0.606 |
| 3.308 | 4.261 | 3.383  | 4.037 | 4.372 | 0.505 | 0.606 |
| 3.645 | 4.192 | 3.507  | 4.466 | 4.703 | 0.489 | 0.606 |
| 6.621 | 6.724 | 5.265  | 7.268 | 7.016 | 0.503 | 0.606 |
| 6.886 | 6.887 | 5.499  | 7.451 | 7.252 | 0.532 | 0.606 |
| 3.861 | 4.296 | 3.305  | 3.860 | 4.594 | 0.692 | 0.606 |
| 4.353 | 3.194 | 1.664  | 4.636 | 4.727 | 1.111 | 0.606 |
| 1.132 | 1.844 | 3.010  | 1.412 | 1.644 | 0.615 | 0.606 |
| 3.997 | 5.317 | 4.792  | 5.738 | 5.371 | 0.517 | 0.606 |
| 5.539 | 5.578 | 5.358  | 6.060 | 5.853 | 0.359 | 0.606 |
| 2.922 | 3.133 | 1.721  | 2.848 | 4.010 | 0.689 | 0.606 |
| 6.358 | 5.876 | 4.070  | 6.342 | 6.681 | 0.752 | 0.606 |
| 3.621 | 3.274 | 0.859  | 3.252 | 4.284 | 0.796 | 0.606 |
| 4.116 | 4.902 | 4.101  | 5.615 | 5.420 | 0.489 | 0.606 |
| 2.820 | 3.761 | 2.758  | 4.177 | 4.415 | 0.583 | 0.606 |
| 3.314 | 4.626 | 2.947  | 5.047 | 4.881 | 0.529 | 0.606 |
| 3.573 | 1.615 | 2.032  | 2.546 | 2.041 | 0.540 | 0.606 |
| 4.194 | 4.942 | 2.199  | 5.763 | 4.805 | 0.638 | 0.606 |
| 6.927 | 7.124 | 7.232  | 7.004 | 5.885 | 0.481 | 0.606 |
| 4.792 | 5.651 | 4.995  | 5.848 | 4.715 | 0.636 | 0.606 |
| 8.826 | 8.114 | 9.115  | 7.871 | 7.771 | 0.373 | 0.606 |
| 4.918 | 4.993 | 3.358  | 5.589 | 5.577 | 0.533 | 0.606 |
| 6.210 | 5.368 | 6.571  | 5.131 | 5.310 | 0.432 | 0.606 |
| 3.393 | 2.802 | 4.406  | 1.893 | 2.385 | 0.598 | 0.606 |
| 3.860 | 4.661 | 4.806  | 5.210 | 5.221 | 0.397 | 0.606 |
| 6.324 | 5.997 | 5.445  | 6.149 | 6.400 | 0.424 | 0.606 |
| 4.579 | 3.325 | 2.870  | 3.808 | 3.600 | 0.444 | 0.606 |
| 6.182 | 7.016 | 5.725  | 7.409 | 7.196 | 0.482 | 0.606 |
| 4.723 | 4.510 | 5.487  | 4.238 | 3.842 | 0.444 | 0.606 |
| 9.539 | 8.211 | 10.130 | 7.333 | 6.590 | 0.697 | 0.606 |
| 4.133 | 6.717 | 2.492  | 6.689 | 6.690 | 0.943 | 0.606 |
| 6.847 | 6.121 | 6.465  | 5.996 | 6.538 | 0.494 | 0.606 |
| 6.728 | 7.044 | 5.525  | 7.287 | 7.807 | 0.477 | 0.606 |
| 7.467 | 7.542 | 7.892  | 7.049 | 7.561 | 0.419 | 0.606 |
| 4.555 | 3.815 | 5.766  | 3.949 | 3.973 | 0.480 | 0.606 |
| 4.451 | 4.274 | 5.224  | 3.485 | 4.364 | 0.375 | 0.606 |
| 1.969 | 1.776 | 2.299  | 1.830 | 2.316 | 0.620 | 0.606 |
| 6.228 | 5.138 | 6.183  | 5.461 | 5.605 | 0.428 | 0.606 |
| 4.750 | 4.480 | 4.742  | 4.828 | 4.857 | 0.326 | 0.606 |
| 3.614 | 4.496 | 4.073  | 3.503 | 4.413 | 0.543 | 0.606 |
| 3.977 | 5.316 | 4.079  | 5.391 | 5.567 | 0.457 | 0.606 |
| 2.431 | 1.913 | 2.724  | 1.361 | 1.925 | 0.654 | 0.606 |
| 7.364 | 6.244 | 6.350  | 6.089 | 7.178 | 0.451 | 0.606 |
| 2.935 | 1.713 | 2.328  | 2.415 | 1.973 | 0.384 | 0.606 |
| 2.144 | 2.124 | 3.428  | 1.836 | 2.325 | 0.432 | 0.606 |
| 4.620 | 4.552 | 4.386  | 4.617 | 5.328 | 0.521 | 0.606 |



|       |       |       |       |       |       |       |
|-------|-------|-------|-------|-------|-------|-------|
| 6.710 | 6.289 | 7.410 | 5.476 | 6.123 | 0.432 | 0.606 |
| 8.327 | 7.883 | 8.313 | 6.894 | 7.622 | 0.437 | 0.606 |
| 9.342 | 9.525 | 7.218 | 9.549 | 9.641 | 0.524 | 0.606 |
| 4.861 | 4.519 | 4.539 | 4.106 | 4.750 | 0.443 | 0.606 |
| 1.913 | 2.884 | 2.682 | 1.934 | 2.581 | 0.486 | 0.606 |
| 2.564 | 2.360 | 4.745 | 1.755 | 2.132 | 0.643 | 0.606 |
| 2.443 | 3.272 | 1.913 | 2.768 | 2.707 | 0.382 | 0.606 |
| 4.644 | 3.033 | 4.369 | 4.549 | 4.655 | 0.528 | 0.606 |
| 2.575 | 3.457 | 2.930 | 3.069 | 1.898 | 0.528 | 0.606 |
| 5.312 | 5.571 | 7.467 | 4.590 | 4.632 | 0.666 | 0.606 |
| 3.277 | 2.417 | 3.020 | 1.481 | 1.447 | 0.578 | 0.606 |
| 2.184 | 2.837 | 1.441 | 1.884 | 2.114 | 0.540 | 0.606 |
| 4.036 | 2.434 | 4.364 | 3.160 | 3.055 | 0.480 | 0.606 |
| 3.988 | 3.882 | 3.861 | 3.977 | 3.870 | 0.439 | 0.606 |
| 3.082 | 3.008 | 3.316 | 2.747 | 2.544 | 0.427 | 0.606 |
| 4.123 | 3.341 | 5.005 | 1.727 | 2.879 | 0.757 | 0.606 |
| 4.229 | 5.134 | 3.721 | 5.004 | 5.326 | 0.509 | 0.606 |
| 5.169 | 4.711 | 4.530 | 5.875 | 4.979 | 0.451 | 0.606 |
| 3.987 | 3.488 | 4.212 | 3.852 | 2.332 | 0.521 | 0.606 |
| 5.384 | 6.331 | 4.628 | 6.387 | 6.169 | 0.455 | 0.606 |
| 5.073 | 4.787 | 6.004 | 4.485 | 5.382 | 0.453 | 0.606 |
| 1.861 | 2.260 | 1.862 | 2.569 | 3.406 | 0.442 | 0.606 |
| 6.395 | 6.170 | 3.785 | 6.526 | 6.394 | 0.595 | 0.606 |
| 5.921 | 6.337 | 5.441 | 6.674 | 6.783 | 0.378 | 0.606 |
| 3.506 | 3.195 | 3.306 | 3.741 | 3.931 | 0.349 | 0.606 |
| 6.065 | 6.215 | 6.284 | 6.151 | 6.533 | 0.313 | 0.606 |
| 7.425 | 7.345 | 5.841 | 7.727 | 7.589 | 0.506 | 0.606 |
| 4.836 | 4.662 | 5.055 | 3.663 | 3.770 | 0.687 | 0.606 |
| 6.069 | 5.533 | 6.515 | 5.735 | 6.250 | 0.512 | 0.606 |
| 6.608 | 7.114 | 6.960 | 7.318 | 7.116 | 0.319 | 0.606 |
| 5.601 | 4.873 | 5.016 | 4.815 | 4.749 | 0.523 | 0.606 |
| 5.932 | 6.799 | 6.273 | 4.158 | 4.335 | 0.800 | 0.606 |
| 9.327 | 9.156 | 9.911 | 8.487 | 8.263 | 0.426 | 0.606 |
| 3.930 | 4.339 | 3.976 | 2.065 | 3.883 | 0.741 | 0.606 |
| 2.962 | 2.093 | 3.422 | 2.962 | 3.130 | 0.527 | 0.606 |
| 3.145 | 3.654 | 3.306 | 2.498 | 3.049 | 0.379 | 0.606 |
| 2.897 | 2.375 | 2.758 | 2.726 | 2.504 | 0.393 | 0.606 |
| 3.775 | 4.281 | 4.354 | 2.544 | 3.128 | 0.854 | 0.606 |
| 3.770 | 3.587 | 4.378 | 2.928 | 2.734 | 0.491 | 0.606 |
| 9.027 | 8.377 | 9.444 | 7.991 | 8.266 | 0.401 | 0.606 |
| 3.896 | 3.895 | 4.384 | 3.788 | 4.210 | 0.294 | 0.606 |
| 4.213 | 4.609 | 3.834 | 4.333 | 4.888 | 0.424 | 0.606 |
| 1.705 | 1.982 | 2.225 | 1.603 | 1.450 | 0.511 | 0.606 |
| 4.966 | 5.370 | 5.395 | 4.201 | 5.147 | 0.483 | 0.606 |
| 6.088 | 6.075 | 4.613 | 6.431 | 6.311 | 0.495 | 0.606 |
| 7.730 | 7.917 | 8.374 | 8.198 | 8.280 | 0.329 | 0.606 |
| 5.880 | 5.309 | 6.425 | 5.405 | 5.415 | 0.401 | 0.606 |
| 4.660 | 5.640 | 5.240 | 4.727 | 4.872 | 0.411 | 0.606 |
| 7.230 | 5.939 | 7.410 | 3.518 | 2.671 | 1.072 | 0.606 |
| 4.710 | 5.330 | 4.911 | 5.726 | 5.425 | 0.397 | 0.606 |

|       |       |       |       |       |       |       |
|-------|-------|-------|-------|-------|-------|-------|
| 4.235 | 4.733 | 5.705 | 3.673 | 4.465 | 0.580 | 0.606 |
| 3.380 | 2.305 | 2.881 | 2.628 | 2.432 | 0.503 | 0.606 |
| 2.594 | 4.434 | 2.317 | 4.580 | 3.891 | 0.948 | 0.606 |
| 4.141 | 2.798 | 3.407 | 3.286 | 3.276 | 0.405 | 0.606 |
| 5.363 | 5.147 | 5.854 | 4.826 | 4.790 | 0.350 | 0.606 |
| 6.339 | 6.110 | 7.415 | 5.791 | 6.099 | 0.405 | 0.606 |
| 3.120 | 4.240 | 3.414 | 4.045 | 3.945 | 0.471 | 0.606 |
| 5.667 | 6.413 | 5.187 | 6.554 | 6.552 | 0.388 | 0.606 |
| 7.026 | 7.456 | 6.892 | 7.623 | 7.495 | 0.314 | 0.606 |
| 5.083 | 5.417 | 3.768 | 6.252 | 5.360 | 0.575 | 0.606 |
| 7.849 | 6.803 | 6.976 | 6.586 | 7.077 | 0.422 | 0.606 |
| 1.945 | 1.774 | 2.408 | 1.462 | 1.241 | 0.503 | 0.606 |
| 5.982 | 5.262 | 6.693 | 5.040 | 5.239 | 0.429 | 0.606 |
| 4.419 | 4.027 | 3.641 | 3.945 | 4.541 | 0.404 | 0.606 |
| 4.839 | 5.531 | 2.961 | 6.072 | 5.877 | 0.685 | 0.606 |
| 4.336 | 3.554 | 4.964 | 3.035 | 2.859 | 0.504 | 0.606 |
| 4.134 | 2.387 | 3.871 | 3.092 | 2.053 | 0.509 | 0.606 |
| 6.962 | 6.485 | 7.622 | 5.449 | 5.565 | 0.498 | 0.606 |
| 5.274 | 4.271 | 4.724 | 3.862 | 3.649 | 0.460 | 0.606 |
| 3.357 | 3.132 | 3.461 | 2.972 | 3.108 | 0.505 | 0.606 |
| 6.448 | 7.242 | 6.380 | 7.468 | 7.337 | 0.344 | 0.606 |
| 3.998 | 3.721 | 4.669 | 4.736 | 4.201 | 0.633 | 0.606 |
| 2.317 | 2.597 | 3.406 | 3.043 | 2.947 | 0.410 | 0.606 |
| 2.516 | 2.770 | 2.389 | 3.029 | 1.938 | 0.501 | 0.606 |
| 2.596 | 2.583 | 3.641 | 2.156 | 2.048 | 0.501 | 0.606 |
| 7.555 | 8.685 | 6.825 | 8.861 | 8.646 | 0.513 | 0.606 |
| 8.586 | 8.504 | 8.094 | 8.775 | 8.708 | 0.328 | 0.606 |
| 6.873 | 3.566 | 2.673 | 3.521 | 3.257 | 1.025 | 0.606 |
| 3.790 | 3.780 | 4.036 | 3.342 | 3.585 | 0.367 | 0.606 |
| 5.976 | 6.608 | 3.941 | 6.908 | 6.400 | 0.670 | 0.606 |
| 3.693 | 3.664 | 4.157 | 3.448 | 3.560 | 0.386 | 0.606 |
| 2.767 | 3.570 | 3.715 | 2.745 | 3.609 | 0.417 | 0.606 |
| 5.748 | 6.801 | 4.338 | 6.631 | 5.884 | 0.665 | 0.606 |
| 3.430 | 3.006 | 4.189 | 3.497 | 2.918 | 0.469 | 0.606 |
| 5.126 | 4.791 | 5.768 | 3.888 | 3.719 | 0.460 | 0.606 |
| 6.025 | 5.788 | 6.667 | 5.347 | 5.269 | 0.381 | 0.606 |
| 6.687 | 6.327 | 5.113 | 6.650 | 6.669 | 0.430 | 0.606 |
| 7.631 | 8.192 | 7.315 | 8.581 | 8.518 | 0.351 | 0.606 |
| 3.454 | 3.101 | 3.075 | 2.067 | 3.380 | 0.433 | 0.606 |
| 1.543 | 2.262 | 2.615 | 2.370 | 1.794 | 0.444 | 0.606 |
| 5.928 | 7.387 | 5.055 | 7.771 | 7.181 | 0.631 | 0.606 |
| 5.208 | 4.963 | 3.376 | 5.612 | 5.351 | 0.504 | 0.606 |
| 3.834 | 4.873 | 4.028 | 4.720 | 5.084 | 0.429 | 0.606 |
| 3.570 | 3.685 | 3.050 | 3.835 | 3.931 | 0.429 | 0.606 |
| 6.636 | 4.961 | 6.742 | 4.174 | 4.719 | 0.584 | 0.606 |
| 4.838 | 4.187 | 4.949 | 3.705 | 4.138 | 0.391 | 0.606 |
| 2.732 | 2.127 | 2.241 | 2.331 | 2.871 | 0.440 | 0.606 |
| 7.695 | 6.978 | 7.960 | 6.949 | 7.200 | 0.396 | 0.606 |
| 2.526 | 2.522 | 2.180 | 3.419 | 3.464 | 0.476 | 0.606 |
| 7.683 | 8.554 | 6.515 | 8.848 | 8.834 | 0.526 | 0.606 |

|        |        |       |        |        |       |       |
|--------|--------|-------|--------|--------|-------|-------|
| 4.666  | 5.074  | 5.277 | 4.718  | 4.533  | 0.444 | 0.606 |
| 6.083  | 7.033  | 6.422 | 7.331  | 7.178  | 0.457 | 0.606 |
| 6.314  | 6.809  | 6.298 | 7.050  | 6.812  | 0.341 | 0.606 |
| 4.567  | 5.853  | 4.818 | 5.522  | 5.881  | 0.402 | 0.606 |
| 3.294  | 4.938  | 3.453 | 5.651  | 5.371  | 0.636 | 0.606 |
| 6.593  | 7.245  | 4.377 | 7.416  | 6.810  | 0.681 | 0.606 |
| 2.413  | 3.927  | 2.609 | 4.436  | 4.447  | 0.672 | 0.606 |
| 4.932  | 5.531  | 4.066 | 6.002  | 6.052  | 0.574 | 0.606 |
| 10.229 | 10.669 | 9.929 | 10.761 | 11.062 | 0.319 | 0.606 |
| 2.361  | 1.687  | 1.646 | 2.143  | 2.479  | 0.666 | 0.606 |
| 1.914  | 1.703  | 1.651 | 1.577  | 1.599  | 0.420 | 0.606 |
| 4.772  | 5.218  | 4.111 | 5.396  | 5.810  | 0.475 | 0.606 |
| 6.065  | 6.641  | 5.776 | 6.543  | 6.493  | 0.324 | 0.606 |
| 7.785  | 8.451  | 7.536 | 8.862  | 8.498  | 0.393 | 0.606 |
| 5.208  | 6.552  | 5.340 | 6.907  | 6.556  | 0.437 | 0.606 |
| 3.890  | 5.202  | 2.677 | 5.966  | 5.607  | 0.671 | 0.606 |
| 4.299  | 4.727  | 5.074 | 3.861  | 4.978  | 0.502 | 0.606 |
| 5.234  | 5.044  | 4.077 | 5.641  | 5.308  | 0.413 | 0.606 |
| 4.656  | 6.212  | 3.574 | 6.749  | 6.537  | 0.723 | 0.606 |
| 5.525  | 5.171  | 4.485 | 5.629  | 5.263  | 0.402 | 0.606 |
| 5.564  | 5.860  | 7.209 | 5.261  | 4.212  | 0.617 | 0.606 |
| 7.570  | 8.166  | 9.319 | 7.300  | 7.529  | 0.576 | 0.606 |
| 6.587  | 6.741  | 8.961 | 6.387  | 6.769  | 0.613 | 0.606 |
| 4.695  | 3.717  | 4.475 | 2.797  | 4.841  | 0.517 | 0.606 |
| 3.498  | 2.990  | 2.314 | 1.369  | 3.165  | 0.522 | 0.606 |
| 5.461  | 5.420  | 4.711 | 5.068  | 5.808  | 0.454 | 0.606 |
| 2.841  | 3.163  | 2.203 | 3.177  | 2.757  | 0.396 | 0.606 |
| 3.977  | 4.315  | 3.831 | 4.781  | 4.885  | 0.377 | 0.606 |
| 2.709  | 5.082  | 2.839 | 4.674  | 5.154  | 0.658 | 0.606 |
| 6.540  | 6.253  | 6.872 | 5.924  | 6.523  | 0.383 | 0.606 |
| 3.554  | 2.558  | 3.408 | 2.212  | 2.597  | 0.552 | 0.606 |
| 5.257  | 4.858  | 5.132 | 4.760  | 4.907  | 0.323 | 0.606 |
| 1.389  | 2.461  | 1.422 | 2.671  | 2.039  | 0.430 | 0.606 |
| 5.082  | 5.016  | 5.534 | 4.651  | 4.667  | 0.383 | 0.606 |
| 6.241  | 6.076  | 6.443 | 6.570  | 6.537  | 0.462 | 0.606 |
| 2.537  | 3.030  | 2.712 | 3.806  | 3.918  | 0.412 | 0.606 |
| 6.577  | 6.513  | 6.099 | 6.634  | 6.786  | 0.321 | 0.606 |
| 4.556  | 4.126  | 3.920 | 4.138  | 4.280  | 0.440 | 0.606 |
| 5.012  | 5.706  | 2.304 | 5.954  | 5.970  | 0.795 | 0.606 |
| 5.495  | 5.560  | 4.886 | 5.884  | 5.667  | 0.414 | 0.606 |
| 7.902  | 6.814  | 9.605 | 5.445  | 6.843  | 0.761 | 0.606 |
| 4.553  | 4.936  | 4.216 | 5.619  | 4.983  | 0.473 | 0.606 |
| 4.613  | 5.619  | 3.739 | 6.454  | 5.730  | 0.600 | 0.606 |
| 6.234  | 6.354  | 4.456 | 6.323  | 6.841  | 0.542 | 0.606 |
| 7.113  | 7.787  | 6.387 | 8.116  | 8.006  | 0.452 | 0.606 |
| 5.575  | 5.088  | 6.545 | 5.515  | 5.055  | 0.436 | 0.606 |
| 4.822  | 5.098  | 4.697 | 5.958  | 5.499  | 0.374 | 0.606 |
| 4.102  | 4.499  | 3.527 | 4.680  | 4.634  | 0.367 | 0.606 |
| 7.883  | 8.641  | 6.162 | 8.874  | 8.590  | 0.727 | 0.606 |
| 5.038  | 3.277  | 6.722 | 4.138  | 4.677  | 0.693 | 0.606 |

|        |        |       |        |        |       |       |
|--------|--------|-------|--------|--------|-------|-------|
| 3.393  | 4.138  | 4.711 | 3.413  | 3.063  | 0.631 | 0.606 |
| 3.744  | 3.742  | 3.939 | 3.550  | 4.309  | 0.424 | 0.606 |
| 6.162  | 5.615  | 7.147 | 5.215  | 5.631  | 0.423 | 0.606 |
| 3.374  | 3.034  | 2.736 | 2.799  | 3.260  | 0.439 | 0.606 |
| 6.163  | 6.246  | 7.099 | 5.864  | 6.109  | 0.350 | 0.606 |
| 5.557  | 5.666  | 5.437 | 6.389  | 5.882  | 0.449 | 0.606 |
| 6.969  | 6.840  | 6.787 | 7.058  | 7.130  | 0.322 | 0.606 |
| 6.848  | 6.406  | 7.957 | 6.274  | 6.410  | 0.427 | 0.606 |
| 5.683  | 6.366  | 5.910 | 6.339  | 6.547  | 0.352 | 0.606 |
| 3.055  | 3.308  | 3.602 | 2.733  | 2.535  | 0.411 | 0.606 |
| 6.341  | 6.589  | 6.130 | 7.007  | 6.903  | 0.403 | 0.606 |
| 4.280  | 5.039  | 3.875 | 5.488  | 5.563  | 0.436 | 0.606 |
| 6.493  | 6.729  | 7.390 | 6.131  | 6.295  | 0.407 | 0.606 |
| 6.985  | 6.042  | 7.455 | 5.808  | 5.903  | 0.423 | 0.606 |
| 8.405  | 8.215  | 7.774 | 8.344  | 8.494  | 0.320 | 0.606 |
| 1.799  | 2.470  | 3.382 | 1.710  | 2.321  | 0.563 | 0.606 |
| 6.889  | 5.279  | 7.737 | 4.351  | 5.117  | 0.819 | 0.606 |
| 6.802  | 6.644  | 8.060 | 5.785  | 5.873  | 0.475 | 0.606 |
| 5.657  | 5.064  | 5.395 | 4.315  | 4.838  | 0.385 | 0.606 |
| 8.103  | 7.681  | 6.364 | 7.639  | 7.798  | 0.428 | 0.606 |
| 6.121  | 5.422  | 6.311 | 5.998  | 6.045  | 0.511 | 0.606 |
| 1.954  | 1.950  | 1.934 | 2.897  | 2.429  | 0.371 | 0.606 |
| 4.969  | 5.222  | 4.617 | 5.650  | 5.782  | 0.332 | 0.606 |
| 4.277  | 4.063  | 5.282 | 3.740  | 3.983  | 0.432 | 0.606 |
| 5.893  | 5.623  | 3.219 | 5.668  | 5.238  | 0.796 | 0.606 |
| 10.190 | 10.042 | 9.883 | 10.001 | 10.263 | 0.321 | 0.606 |
| 8.648  | 9.310  | 8.413 | 9.351  | 9.245  | 0.333 | 0.606 |
| 1.873  | 2.494  | 2.672 | 2.494  | 2.642  | 0.441 | 0.606 |
| 7.085  | 9.039  | 6.486 | 9.517  | 9.451  | 0.709 | 0.606 |
| 6.643  | 7.795  | 4.047 | 7.820  | 8.100  | 0.857 | 0.606 |
| 5.141  | 5.908  | 2.022 | 5.908  | 6.170  | 0.989 | 0.606 |
| 7.616  | 8.257  | 6.833 | 8.415  | 8.244  | 0.381 | 0.606 |
| 2.409  | 2.193  | 1.858 | 2.912  | 2.663  | 0.457 | 0.606 |
| 3.089  | 2.241  | 1.824 | 1.358  | 1.700  | 0.509 | 0.606 |
| 8.787  | 9.046  | 7.951 | 8.928  | 9.199  | 0.329 | 0.606 |
| 10.282 | 10.813 | 9.787 | 10.828 | 10.933 | 0.344 | 0.606 |
| 5.209  | 5.527  | 5.202 | 5.880  | 5.756  | 0.349 | 0.606 |
| 3.183  | 3.469  | 3.150 | 3.262  | 3.605  | 0.521 | 0.606 |
| 9.105  | 9.366  | 8.680 | 9.534  | 9.457  | 0.346 | 0.606 |
| 9.728  | 10.124 | 9.239 | 10.217 | 9.971  | 0.333 | 0.606 |
| 9.445  | 9.069  | 9.865 | 8.566  | 9.235  | 0.371 | 0.606 |
| 8.255  | 8.431  | 6.518 | 8.723  | 8.651  | 0.520 | 0.606 |
| 8.810  | 9.245  | 7.832 | 9.394  | 9.547  | 0.422 | 0.606 |
| 8.058  | 8.889  | 7.519 | 9.315  | 9.314  | 0.459 | 0.606 |
| 5.561  | 5.581  | 5.045 | 6.057  | 5.865  | 0.321 | 0.606 |
| 6.925  | 7.895  | 6.217 | 8.152  | 7.973  | 0.461 | 0.606 |
| 4.118  | 4.259  | 2.883 | 4.857  | 4.471  | 0.480 | 0.606 |
| 9.363  | 8.849  | 9.888 | 9.200  | 8.956  | 0.372 | 0.606 |
| 8.003  | 7.545  | 4.437 | 8.118  | 8.090  | 0.924 | 0.606 |
| 3.604  | 4.648  | 3.670 | 4.670  | 4.860  | 0.571 | 0.606 |

|       |       |       |        |        |       |       |
|-------|-------|-------|--------|--------|-------|-------|
| 4.561 | 3.965 | 4.742 | 3.434  | 3.746  | 0.497 | 0.606 |
| 6.949 | 6.808 | 6.406 | 6.814  | 7.326  | 0.306 | 0.606 |
| 5.812 | 5.366 | 5.374 | 5.405  | 5.451  | 0.340 | 0.606 |
| 7.064 | 7.413 | 7.031 | 7.543  | 7.558  | 0.323 | 0.606 |
| 7.304 | 9.689 | 6.907 | 10.250 | 10.215 | 0.852 | 0.606 |
| 3.618 | 2.634 | 2.743 | 3.378  | 3.321  | 0.505 | 0.606 |
| 7.348 | 7.726 | 5.921 | 8.077  | 7.898  | 0.512 | 0.606 |
| 8.142 | 8.698 | 7.782 | 8.942  | 8.960  | 0.372 | 0.606 |
| 2.149 | 2.056 | 2.478 | 2.498  | 1.921  | 0.481 | 0.606 |
| 3.337 | 3.196 | 4.189 | 3.395  | 2.755  | 0.489 | 0.606 |
| 6.849 | 7.252 | 6.052 | 7.356  | 7.298  | 0.342 | 0.606 |
| 5.575 | 5.846 | 5.419 | 6.237  | 5.928  | 0.487 | 0.606 |
| 2.787 | 3.400 | 3.553 | 2.193  | 3.170  | 0.608 | 0.606 |
| 7.730 | 7.536 | 7.851 | 6.589  | 7.249  | 0.380 | 0.606 |
| 4.546 | 4.600 | 3.677 | 5.201  | 4.508  | 0.405 | 0.606 |
| 5.050 | 5.565 | 4.074 | 6.637  | 6.853  | 0.751 | 0.606 |
| 7.104 | 7.904 | 7.224 | 8.346  | 8.112  | 0.504 | 0.606 |
| 6.644 | 5.531 | 7.556 | 5.719  | 5.783  | 0.546 | 0.606 |
| 6.935 | 7.149 | 5.457 | 7.265  | 7.309  | 0.439 | 0.606 |
| 2.291 | 2.710 | 2.150 | 4.245  | 3.706  | 0.539 | 0.606 |
| 4.557 | 4.312 | 5.365 | 4.124  | 4.243  | 0.430 | 0.606 |
| 5.254 | 6.429 | 2.541 | 6.709  | 6.195  | 0.790 | 0.606 |
| 2.183 | 2.069 | 2.457 | 3.133  | 2.251  | 0.436 | 0.606 |
| 4.235 | 4.258 | 4.577 | 3.966  | 4.133  | 0.415 | 0.606 |
| 7.501 | 7.787 | 6.763 | 7.824  | 7.872  | 0.347 | 0.606 |
| 6.638 | 7.487 | 3.438 | 7.723  | 7.706  | 0.876 | 0.606 |
| 3.688 | 4.780 | 3.328 | 4.001  | 3.568  | 0.451 | 0.606 |
| 2.328 | 3.486 | 3.209 | 1.682  | 2.209  | 0.573 | 0.606 |
| 1.924 | 3.024 | 3.235 | 3.289  | 2.303  | 0.459 | 0.606 |
| 2.462 | 2.635 | 2.341 | 1.972  | 2.917  | 0.403 | 0.606 |
| 8.125 | 7.680 | 8.878 | 7.154  | 7.029  | 0.495 | 0.606 |
| 4.220 | 4.156 | 4.161 | 3.528  | 3.247  | 0.465 | 0.606 |
| 3.684 | 3.166 | 3.218 | 2.442  | 2.330  | 0.485 | 0.606 |
| 2.676 | 2.034 | 2.790 | 2.259  | 2.190  | 0.449 | 0.606 |
| 4.387 | 4.781 | 5.349 | 5.540  | 5.311  | 0.434 | 0.606 |
| 5.724 | 5.478 | 5.997 | 5.075  | 4.905  | 0.575 | 0.606 |
| 4.856 | 5.824 | 4.535 | 6.073  | 5.899  | 0.405 | 0.606 |
| 5.486 | 5.635 | 3.664 | 5.978  | 5.671  | 0.616 | 0.606 |
| 4.954 | 6.386 | 4.703 | 6.501  | 6.092  | 0.488 | 0.606 |
| 7.301 | 8.368 | 7.565 | 8.768  | 8.833  | 0.494 | 0.606 |
| 4.379 | 6.106 | 4.248 | 6.225  | 5.871  | 0.580 | 0.606 |
| 4.359 | 4.184 | 3.423 | 5.296  | 4.581  | 0.448 | 0.606 |
| 2.859 | 3.230 | 3.243 | 3.748  | 3.849  | 0.449 | 0.606 |
| 6.108 | 6.620 | 4.407 | 6.435  | 5.725  | 0.634 | 0.606 |
| 6.101 | 5.556 | 7.343 | 4.915  | 5.293  | 0.514 | 0.606 |
| 5.680 | 7.025 | 5.575 | 7.003  | 6.675  | 0.446 | 0.606 |
| 4.206 | 4.446 | 4.643 | 3.894  | 3.750  | 0.415 | 0.606 |
| 1.379 | 1.382 | 1.090 | 1.193  | 1.044  | 0.404 | 0.606 |
| 8.833 | 9.897 | 6.484 | 10.146 | 9.925  | 0.776 | 0.606 |
| 3.320 | 3.338 | 4.017 | 3.011  | 3.626  | 0.464 | 0.606 |

|       |       |       |       |       |       |       |
|-------|-------|-------|-------|-------|-------|-------|
| 4.180 | 3.780 | 4.233 | 4.003 | 3.962 | 0.424 | 0.606 |
| 4.811 | 4.596 | 5.869 | 3.928 | 4.508 | 0.438 | 0.606 |
| 8.013 | 7.164 | 8.456 | 7.160 | 7.155 | 0.387 | 0.606 |
| 4.008 | 3.434 | 3.642 | 3.407 | 3.640 | 0.426 | 0.606 |
| 4.938 | 5.706 | 6.207 | 5.749 | 6.122 | 0.456 | 0.606 |
| 7.071 | 7.403 | 6.580 | 7.589 | 7.382 | 0.376 | 0.606 |
| 6.195 | 5.824 | 6.884 | 5.564 | 5.271 | 0.386 | 0.606 |
| 6.569 | 6.411 | 7.547 | 6.772 | 6.722 | 0.441 | 0.606 |
| 3.995 | 3.625 | 4.003 | 3.876 | 3.701 | 0.389 | 0.606 |
| 7.403 | 6.449 | 7.320 | 5.482 | 5.807 | 0.482 | 0.606 |
| 4.324 | 5.009 | 3.783 | 5.147 | 4.764 | 0.416 | 0.606 |
| 6.666 | 6.182 | 5.328 | 6.030 | 6.262 | 0.456 | 0.606 |
| 2.270 | 3.102 | 2.551 | 3.556 | 3.136 | 0.373 | 0.606 |
| 3.622 | 3.057 | 4.238 | 3.081 | 2.774 | 0.450 | 0.606 |
| 4.026 | 5.708 | 2.863 | 6.416 | 6.109 | 0.813 | 0.606 |
| 2.769 | 4.422 | 1.978 | 4.254 | 5.523 | 0.739 | 0.606 |
| 6.503 | 5.934 | 7.124 | 6.156 | 6.220 | 0.375 | 0.606 |
| 2.097 | 3.963 | 2.912 | 2.694 | 3.014 | 0.716 | 0.606 |
| 3.352 | 4.130 | 4.044 | 3.332 | 4.057 | 0.409 | 0.606 |
| 7.070 | 8.158 | 8.450 | 7.713 | 7.402 | 0.473 | 0.606 |
| 4.549 | 3.064 | 1.988 | 3.277 | 2.704 | 0.527 | 0.606 |
| 5.391 | 6.272 | 5.506 | 6.855 | 6.250 | 0.419 | 0.606 |
| 4.357 | 3.437 | 4.626 | 3.714 | 4.070 | 0.396 | 0.606 |
| 1.916 | 3.060 | 1.862 | 2.078 | 2.379 | 0.560 | 0.606 |
| 5.911 | 4.989 | 5.916 | 4.687 | 5.061 | 0.452 | 0.606 |
| 4.122 | 4.262 | 5.040 | 4.371 | 3.980 | 0.429 | 0.606 |
| 4.759 | 4.581 | 4.423 | 4.929 | 5.257 | 0.355 | 0.606 |
| 4.694 | 3.687 | 4.952 | 3.393 | 3.962 | 0.419 | 0.606 |
| 4.231 | 3.301 | 4.261 | 3.010 | 3.064 | 0.449 | 0.606 |
| 3.421 | 3.318 | 2.838 | 4.414 | 3.820 | 0.418 | 0.606 |
| 2.502 | 3.379 | 1.728 | 3.717 | 2.952 | 0.560 | 0.606 |
| 2.692 | 3.113 | 1.774 | 3.346 | 3.071 | 0.464 | 0.606 |
| 4.639 | 5.119 | 3.945 | 5.753 | 5.153 | 0.465 | 0.606 |
| 6.734 | 6.418 | 5.348 | 7.028 | 7.055 | 0.559 | 0.606 |
| 7.709 | 6.901 | 7.853 | 4.407 | 5.174 | 0.805 | 0.606 |
| 2.587 | 3.890 | 3.244 | 1.815 | 2.592 | 0.674 | 0.606 |
| 9.071 | 9.239 | 6.707 | 9.620 | 9.514 | 0.699 | 0.606 |
| 4.892 | 5.312 | 4.266 | 5.495 | 5.206 | 0.470 | 0.606 |
| 5.677 | 5.183 | 3.601 | 5.475 | 5.814 | 0.565 | 0.606 |
| 6.170 | 7.399 | 7.609 | 5.873 | 6.538 | 0.509 | 0.606 |
| 2.829 | 3.399 | 2.368 | 3.558 | 3.340 | 0.508 | 0.606 |
| 5.844 | 6.290 | 5.450 | 7.274 | 6.484 | 0.456 | 0.606 |
| 2.380 | 3.395 | 2.255 | 3.105 | 3.272 | 0.431 | 0.606 |
| 2.910 | 3.367 | 3.410 | 3.296 | 3.042 | 0.352 | 0.606 |
| 6.649 | 7.351 | 6.424 | 7.300 | 7.177 | 0.411 | 0.606 |
| 8.503 | 7.864 | 8.384 | 7.413 | 7.444 | 0.387 | 0.606 |
| 3.307 | 2.740 | 2.783 | 2.647 | 2.832 | 0.379 | 0.606 |
| 3.529 | 4.571 | 3.988 | 5.091 | 5.348 | 0.529 | 0.606 |
| 4.854 | 5.157 | 5.098 | 4.336 | 4.999 | 0.515 | 0.606 |
| 3.315 | 4.259 | 5.072 | 3.423 | 3.513 | 0.565 | 0.606 |

|       |       |       |       |       |       |       |
|-------|-------|-------|-------|-------|-------|-------|
| 2.052 | 2.913 | 2.919 | 2.723 | 2.494 | 0.430 | 0.606 |
| 3.550 | 2.945 | 4.552 | 1.958 | 2.388 | 0.707 | 0.606 |
| 4.981 | 3.600 | 4.609 | 3.229 | 4.038 | 0.790 | 0.606 |
| 3.909 | 4.866 | 4.642 | 4.201 | 4.119 | 0.399 | 0.606 |
| 7.307 | 6.496 | 7.046 | 6.675 | 6.887 | 0.391 | 0.606 |
| 3.254 | 3.569 | 2.198 | 3.779 | 4.179 | 0.523 | 0.606 |
| 2.865 | 4.208 | 3.800 | 4.473 | 5.544 | 0.655 | 0.606 |
| 1.416 | 1.506 | 1.239 | 3.298 | 4.655 | 1.053 | 0.606 |
| 3.812 | 3.843 | 3.140 | 4.047 | 5.374 | 0.639 | 0.606 |
| 4.369 | 3.901 | 5.768 | 4.068 | 4.019 | 0.510 | 0.606 |
| 4.961 | 4.682 | 5.328 | 4.627 | 4.370 | 0.378 | 0.606 |
| 2.906 | 3.351 | 4.585 | 3.229 | 2.843 | 0.547 | 0.606 |
| 4.603 | 5.408 | 3.935 | 5.774 | 5.370 | 0.468 | 0.606 |
| 9.094 | 9.116 | 8.260 | 9.435 | 9.481 | 0.328 | 0.606 |
| 6.732 | 6.049 | 6.047 | 6.355 | 6.412 | 0.349 | 0.606 |
| 4.456 | 3.502 | 3.441 | 3.545 | 4.543 | 0.545 | 0.606 |
| 3.392 | 2.857 | 3.785 | 2.211 | 2.512 | 0.622 | 0.606 |
| 2.996 | 2.877 | 3.467 | 2.278 | 2.503 | 0.499 | 0.606 |
| 4.125 | 3.382 | 3.917 | 4.139 | 3.565 | 0.407 | 0.606 |
| 7.292 | 6.799 | 8.766 | 5.555 | 5.219 | 0.667 | 0.606 |
| 3.929 | 4.357 | 4.045 | 5.150 | 4.748 | 0.454 | 0.606 |
| 7.133 | 7.465 | 6.801 | 7.709 | 7.598 | 0.320 | 0.606 |
| 6.686 | 6.695 | 6.311 | 6.936 | 7.313 | 0.325 | 0.606 |
| 2.505 | 2.822 | 2.249 | 2.197 | 2.732 | 0.451 | 0.606 |
| 2.296 | 2.047 | 1.975 | 1.765 | 1.830 | 0.325 | 0.606 |
| 7.008 | 7.877 | 5.809 | 8.117 | 8.039 | 0.547 | 0.606 |
| 5.260 | 6.856 | 4.654 | 7.256 | 6.934 | 0.641 | 0.606 |
| 7.174 | 6.927 | 5.852 | 7.373 | 7.231 | 0.474 | 0.606 |
| 4.204 | 4.593 | 3.947 | 5.187 | 4.936 | 0.366 | 0.606 |
| 4.793 | 5.568 | 5.386 | 5.841 | 5.522 | 0.379 | 0.606 |
| 7.349 | 7.560 | 6.437 | 7.730 | 7.279 | 0.416 | 0.606 |
| 5.623 | 5.998 | 5.254 | 6.459 | 6.379 | 0.367 | 0.606 |
| 5.346 | 7.279 | 3.715 | 7.808 | 7.099 | 0.861 | 0.606 |
| 2.121 | 3.292 | 1.617 | 3.476 | 3.206 | 0.474 | 0.606 |
| 2.862 | 2.970 | 3.576 | 1.967 | 2.829 | 0.445 | 0.606 |
| 5.137 | 6.055 | 5.397 | 4.396 | 5.312 | 0.461 | 0.606 |
| 5.618 | 6.377 | 5.516 | 6.646 | 6.607 | 0.380 | 0.606 |
| 5.154 | 4.801 | 3.258 | 4.948 | 4.625 | 0.534 | 0.606 |
| 2.783 | 2.365 | 3.183 | 1.673 | 1.609 | 0.433 | 0.606 |
| 3.061 | 3.032 | 2.245 | 2.626 | 2.493 | 0.461 | 0.606 |
| 3.578 | 2.589 | 2.508 | 2.576 | 2.157 | 0.562 | 0.606 |
| 6.885 | 6.842 | 7.632 | 7.415 | 6.954 | 0.372 | 0.606 |
| 4.492 | 4.962 | 4.434 | 5.513 | 4.916 | 0.411 | 0.606 |
| 5.227 | 4.459 | 6.359 | 4.444 | 4.882 | 0.484 | 0.606 |
| 6.164 | 6.585 | 5.286 | 7.007 | 6.963 | 0.421 | 0.606 |
| 7.062 | 7.622 | 7.914 | 6.637 | 6.590 | 0.462 | 0.606 |
| 2.996 | 3.507 | 4.432 | 2.824 | 3.024 | 0.459 | 0.606 |
| 3.632 | 4.206 | 4.887 | 3.463 | 3.910 | 0.592 | 0.606 |
| 7.671 | 7.965 | 7.188 | 8.198 | 8.081 | 0.322 | 0.606 |
| 6.800 | 6.579 | 8.078 | 5.255 | 5.531 | 0.611 | 0.606 |

|       |       |       |       |       |       |       |
|-------|-------|-------|-------|-------|-------|-------|
| 3.161 | 2.462 | 4.573 | 2.305 | 2.500 | 0.574 | 0.606 |
| 4.166 | 5.141 | 2.635 | 5.567 | 5.418 | 0.605 | 0.606 |
| 3.079 | 4.617 | 3.256 | 4.523 | 4.852 | 0.487 | 0.606 |
| 4.528 | 6.989 | 4.410 | 5.384 | 4.930 | 0.788 | 0.606 |
| 4.638 | 2.698 | 4.679 | 1.226 | 1.667 | 0.828 | 0.606 |
| 4.936 | 3.834 | 5.182 | 4.080 | 4.228 | 0.475 | 0.606 |
| 3.211 | 2.191 | 2.897 | 2.479 | 2.481 | 0.464 | 0.606 |
| 4.765 | 3.812 | 5.761 | 2.117 | 3.080 | 0.731 | 0.606 |
| 3.008 | 3.356 | 3.480 | 2.580 | 3.646 | 0.439 | 0.606 |
| 2.607 | 1.888 | 1.333 | 2.795 | 2.303 | 0.487 | 0.606 |
| 4.287 | 4.027 | 4.270 | 3.234 | 3.553 | 0.540 | 0.606 |
| 4.616 | 4.106 | 5.124 | 3.582 | 3.638 | 0.480 | 0.606 |
| 5.320 | 5.997 | 5.274 | 5.928 | 5.841 | 0.428 | 0.606 |
| 5.625 | 4.208 | 6.136 | 3.381 | 3.813 | 0.677 | 0.606 |
| 5.217 | 4.943 | 5.972 | 5.043 | 4.756 | 0.413 | 0.606 |
| 3.687 | 2.994 | 5.492 | 3.467 | 3.167 | 0.531 | 0.606 |
| 4.406 | 3.221 | 5.881 | 2.395 | 3.031 | 0.708 | 0.606 |
| 3.792 | 2.612 | 2.678 | 2.769 | 3.485 | 0.540 | 0.606 |
| 3.748 | 3.530 | 3.422 | 3.942 | 4.579 | 0.400 | 0.606 |
| 4.316 | 4.855 | 3.401 | 4.893 | 4.764 | 0.402 | 0.606 |
| 4.588 | 7.551 | 1.463 | 7.702 | 7.457 | 1.378 | 0.606 |
| 2.942 | 1.278 | 1.006 | 0.925 | 0.941 | 0.748 | 0.606 |
| 2.849 | 1.828 | 2.123 | 2.193 | 2.238 | 0.495 | 0.606 |
| 2.070 | 3.429 | 0.822 | 2.374 | 2.645 | 0.637 | 0.606 |
| 6.027 | 6.463 | 6.375 | 6.735 | 6.807 | 0.302 | 0.606 |
| 6.122 | 6.527 | 6.222 | 6.825 | 6.748 | 0.394 | 0.606 |
| 4.768 | 5.142 | 4.347 | 5.533 | 5.263 | 0.337 | 0.606 |
| 4.257 | 4.239 | 4.295 | 4.466 | 4.296 | 0.385 | 0.606 |
| 3.634 | 2.238 | 2.739 | 2.400 | 2.296 | 0.605 | 0.606 |
| 4.706 | 4.286 | 6.025 | 4.667 | 4.760 | 0.402 | 0.606 |
| 6.092 | 6.756 | 4.543 | 6.882 | 6.448 | 0.479 | 0.606 |
| 2.551 | 3.219 | 2.250 | 3.673 | 3.623 | 0.426 | 0.606 |
| 4.026 | 4.417 | 3.511 | 4.672 | 4.721 | 0.378 | 0.606 |
| 1.536 | 4.182 | 2.843 | 4.564 | 4.833 | 0.749 | 0.606 |
| 6.232 | 5.375 | 4.652 | 5.792 | 6.340 | 0.517 | 0.606 |
| 2.888 | 4.166 | 1.808 | 4.044 | 4.298 | 0.647 | 0.606 |
| 3.445 | 3.320 | 3.522 | 3.372 | 3.697 | 0.382 | 0.606 |
| 4.301 | 3.721 | 3.651 | 3.287 | 2.937 | 0.370 | 0.606 |
| 6.608 | 6.455 | 5.299 | 6.342 | 6.483 | 0.487 | 0.606 |
| 4.542 | 5.268 | 4.170 | 5.831 | 5.840 | 0.478 | 0.606 |
| 5.301 | 4.747 | 4.587 | 5.312 | 5.305 | 0.467 | 0.606 |
| 5.747 | 6.262 | 5.916 | 6.486 | 6.378 | 0.346 | 0.606 |
| 7.211 | 7.778 | 6.627 | 7.893 | 7.883 | 0.360 | 0.606 |
| 4.845 | 5.676 | 4.767 | 5.784 | 5.956 | 0.369 | 0.606 |
| 7.269 | 7.690 | 7.714 | 7.992 | 7.518 | 0.444 | 0.606 |
| 5.166 | 6.216 | 4.801 | 6.530 | 6.347 | 0.471 | 0.606 |
| 3.799 | 4.287 | 4.612 | 3.968 | 4.379 | 0.427 | 0.606 |
| 4.063 | 2.934 | 2.512 | 3.093 | 3.236 | 0.393 | 0.606 |
| 4.283 | 4.893 | 4.435 | 5.522 | 5.254 | 0.406 | 0.606 |
| 2.835 | 4.052 | 2.300 | 3.895 | 4.019 | 0.509 | 0.606 |



|       |       |       |       |       |       |       |
|-------|-------|-------|-------|-------|-------|-------|
| 2.756 | 2.412 | 2.691 | 2.535 | 2.554 | 0.394 | 0.606 |
| 4.658 | 5.179 | 4.351 | 5.986 | 5.124 | 0.512 | 0.606 |
| 3.186 | 3.622 | 2.773 | 4.074 | 3.974 | 0.432 | 0.606 |
| 5.801 | 6.514 | 6.610 | 5.384 | 5.721 | 0.431 | 0.606 |
| 5.817 | 5.905 | 5.335 | 6.114 | 6.392 | 0.404 | 0.606 |
| 2.653 | 3.643 | 2.124 | 4.157 | 3.779 | 0.557 | 0.606 |
| 5.491 | 5.460 | 4.725 | 4.991 | 5.524 | 0.452 | 0.606 |
| 3.598 | 3.680 | 3.612 | 4.227 | 3.968 | 0.380 | 0.606 |
| 6.084 | 6.371 | 5.605 | 6.728 | 6.705 | 0.349 | 0.606 |
| 3.888 | 3.087 | 2.194 | 3.940 | 3.022 | 0.585 | 0.606 |
| 4.566 | 4.416 | 5.632 | 3.594 | 3.536 | 0.506 | 0.606 |
| 4.192 | 4.360 | 3.747 | 4.884 | 4.082 | 0.350 | 0.606 |
| 3.878 | 2.857 | 2.949 | 2.645 | 2.754 | 0.509 | 0.606 |
| 3.553 | 4.422 | 3.232 | 4.372 | 4.070 | 0.441 | 0.606 |
| 2.235 | 2.178 | 1.530 | 1.791 | 2.261 | 0.545 | 0.606 |
| 2.848 | 2.814 | 2.848 | 2.559 | 2.267 | 0.406 | 0.606 |
| 3.765 | 4.798 | 5.760 | 3.563 | 3.838 | 0.675 | 0.606 |
| 3.616 | 3.320 | 4.203 | 2.825 | 3.274 | 0.521 | 0.606 |
| 2.396 | 2.253 | 2.913 | 3.456 | 2.871 | 0.448 | 0.606 |
| 1.906 | 3.225 | 2.035 | 2.045 | 2.885 | 0.488 | 0.606 |
| 3.846 | 4.280 | 5.158 | 4.363 | 3.799 | 0.432 | 0.606 |
| 1.851 | 2.632 | 2.541 | 2.624 | 2.530 | 0.431 | 0.606 |
| 6.410 | 6.058 | 7.219 | 5.647 | 5.982 | 0.470 | 0.606 |
| 1.404 | 2.895 | 2.418 | 2.145 | 2.721 | 0.561 | 0.606 |
| 4.016 | 7.759 | 3.966 | 8.189 | 7.614 | 1.020 | 0.606 |
| 3.295 | 1.394 | 1.125 | 1.137 | 0.953 | 0.720 | 0.606 |
| 4.626 | 5.917 | 5.863 | 3.933 | 4.744 | 0.794 | 0.606 |
| 5.579 | 4.007 | 3.692 | 3.124 | 3.294 | 0.855 | 0.606 |
| 3.417 | 2.993 | 2.659 | 3.204 | 3.037 | 0.492 | 0.606 |
| 5.854 | 5.611 | 7.007 | 4.914 | 5.081 | 0.493 | 0.606 |
| 5.489 | 5.891 | 5.053 | 6.329 | 6.454 | 0.440 | 0.606 |
| 3.628 | 4.212 | 3.005 | 4.742 | 4.489 | 0.444 | 0.606 |
| 3.345 | 1.935 | 2.273 | 2.769 | 3.568 | 0.457 | 0.606 |
| 2.441 | 2.795 | 3.234 | 2.440 | 2.093 | 0.405 | 0.606 |
| 3.014 | 3.867 | 2.337 | 3.178 | 3.156 | 0.464 | 0.606 |
| 5.438 | 4.931 | 3.098 | 4.727 | 5.131 | 0.541 | 0.606 |
| 4.376 | 4.255 | 4.350 | 3.722 | 4.488 | 0.372 | 0.606 |
| 6.355 | 5.013 | 5.347 | 5.379 | 5.860 | 0.505 | 0.606 |
| 3.910 | 3.865 | 3.864 | 3.670 | 4.079 | 0.475 | 0.606 |
| 4.099 | 4.392 | 4.426 | 4.103 | 4.242 | 0.360 | 0.606 |
| 3.523 | 1.835 | 1.588 | 1.590 | 1.405 | 0.843 | 0.606 |
| 2.001 | 2.116 | 1.753 | 2.084 | 2.508 | 0.442 | 0.606 |
| 4.204 | 5.049 | 3.391 | 4.584 | 4.083 | 0.430 | 0.606 |
| 2.592 | 3.904 | 4.068 | 2.397 | 2.951 | 0.706 | 0.606 |
| 5.928 | 7.278 | 7.484 | 4.630 | 6.124 | 0.831 | 0.606 |
| 6.454 | 7.557 | 7.779 | 5.134 | 6.516 | 0.764 | 0.606 |
| 4.559 | 4.425 | 3.873 | 3.531 | 3.085 | 0.576 | 0.606 |
| 4.780 | 6.067 | 4.352 | 6.243 | 5.932 | 0.576 | 0.606 |
| 5.053 | 7.943 | 2.670 | 8.994 | 8.807 | 1.343 | 0.606 |
| 1.727 | 2.187 | 2.012 | 2.111 | 1.933 | 0.532 | 0.606 |

|       |       |       |       |       |       |       |
|-------|-------|-------|-------|-------|-------|-------|
| 4.896 | 5.857 | 2.955 | 5.898 | 6.217 | 0.748 | 0.606 |
| 3.289 | 2.653 | 4.443 | 3.223 | 3.367 | 0.490 | 0.606 |
| 2.285 | 2.141 | 2.096 | 2.385 | 2.407 | 0.425 | 0.606 |
| 3.389 | 4.382 | 3.307 | 2.858 | 3.190 | 0.532 | 0.606 |
| 3.588 | 4.559 | 3.559 | 3.096 | 3.709 | 0.468 | 0.606 |
| 4.294 | 5.387 | 4.693 | 4.406 | 5.171 | 0.495 | 0.606 |
| 2.993 | 4.073 | 3.642 | 3.090 | 3.736 | 0.468 | 0.606 |
| 3.082 | 4.168 | 3.761 | 3.167 | 3.810 | 0.477 | 0.606 |
| 3.077 | 4.096 | 3.739 | 3.128 | 3.787 | 0.461 | 0.606 |
| 3.231 | 4.206 | 3.824 | 3.056 | 3.886 | 0.456 | 0.606 |
| 3.068 | 4.154 | 3.665 | 2.867 | 3.509 | 0.544 | 0.606 |
| 3.491 | 3.171 | 3.559 | 3.198 | 2.859 | 0.416 | 0.606 |
| 3.202 | 2.833 | 2.416 | 2.596 | 2.754 | 0.428 | 0.606 |
| 2.710 | 4.177 | 1.837 | 4.877 | 4.020 | 0.662 | 0.606 |
| 2.205 | 2.153 | 2.232 | 2.398 | 3.373 | 0.394 | 0.606 |
| 2.722 | 2.809 | 2.798 | 4.424 | 3.997 | 0.548 | 0.606 |
| 5.542 | 2.509 | 4.857 | 1.543 | 1.180 | 1.190 | 0.606 |
| 2.775 | 2.611 | 4.264 | 2.379 | 2.357 | 0.471 | 0.606 |
| 4.398 | 3.656 | 4.768 | 2.599 | 3.288 | 0.535 | 0.606 |
| 4.228 | 3.910 | 3.688 | 3.921 | 3.909 | 0.367 | 0.606 |
| 5.058 | 4.204 | 6.563 | 3.246 | 3.746 | 0.667 | 0.606 |
| 1.760 | 3.711 | 1.578 | 4.081 | 4.306 | 0.683 | 0.606 |
| 4.888 | 5.064 | 4.701 | 5.589 | 5.060 | 0.448 | 0.606 |
| 4.082 | 3.220 | 3.961 | 3.164 | 3.040 | 0.433 | 0.606 |
| 3.596 | 2.669 | 3.434 | 3.438 | 2.472 | 0.545 | 0.606 |
| 6.715 | 6.475 | 6.926 | 6.506 | 6.433 | 0.324 | 0.606 |
| 3.354 | 3.906 | 3.292 | 3.484 | 4.255 | 0.408 | 0.606 |
| 6.831 | 7.218 | 6.592 | 7.358 | 7.547 | 0.333 | 0.606 |
| 2.983 | 3.406 | 2.553 | 4.240 | 3.620 | 0.495 | 0.606 |
| 3.490 | 2.262 | 2.647 | 2.720 | 2.561 | 0.410 | 0.606 |
| 3.261 | 3.137 | 2.424 | 4.214 | 4.289 | 0.520 | 0.606 |
| 5.904 | 5.614 | 6.735 | 4.219 | 5.089 | 0.490 | 0.606 |
| 5.029 | 5.063 | 4.991 | 5.732 | 5.344 | 0.340 | 0.606 |
| 6.057 | 6.040 | 5.506 | 6.067 | 5.623 | 0.406 | 0.606 |
| 4.574 | 6.254 | 2.814 | 6.407 | 6.747 | 0.941 | 0.606 |
| 3.788 | 3.295 | 4.174 | 3.177 | 2.977 | 0.535 | 0.606 |
| 3.081 | 2.864 | 3.433 | 2.250 | 2.309 | 0.411 | 0.606 |
| 8.654 | 8.605 | 9.501 | 6.269 | 8.180 | 0.727 | 0.606 |
| 2.973 | 3.688 | 3.953 | 2.835 | 3.241 | 0.541 | 0.606 |
| 5.253 | 5.599 | 4.987 | 5.993 | 5.881 | 0.400 | 0.606 |
| 5.498 | 5.602 | 5.767 | 5.473 | 5.749 | 0.400 | 0.606 |
| 2.555 | 2.128 | 2.190 | 2.784 | 2.430 | 0.342 | 0.606 |
| 4.400 | 3.767 | 4.615 | 3.698 | 3.586 | 0.436 | 0.606 |
| 4.598 | 4.546 | 5.516 | 4.509 | 4.438 | 0.394 | 0.606 |
| 2.365 | 3.278 | 2.231 | 3.505 | 2.967 | 0.428 | 0.606 |
| 2.395 | 6.057 | 1.459 | 6.276 | 6.568 | 1.178 | 0.606 |
| 7.457 | 6.301 | 5.837 | 4.172 | 5.041 | 0.706 | 0.606 |
| 7.777 | 6.618 | 6.120 | 4.414 | 5.276 | 0.722 | 0.606 |
| 7.652 | 6.498 | 5.986 | 4.421 | 5.219 | 0.712 | 0.606 |
| 7.780 | 6.617 | 6.096 | 4.447 | 5.305 | 0.723 | 0.606 |

|       |       |       |       |       |       |       |
|-------|-------|-------|-------|-------|-------|-------|
| 7.811 | 6.647 | 6.151 | 4.389 | 5.276 | 0.733 | 0.606 |
| 7.828 | 6.635 | 6.119 | 4.347 | 5.276 | 0.740 | 0.606 |
| 7.828 | 6.683 | 6.071 | 4.441 | 5.347 | 0.719 | 0.606 |
| 6.956 | 5.880 | 5.354 | 4.054 | 4.795 | 0.645 | 0.606 |
| 7.104 | 5.990 | 5.505 | 4.111 | 4.729 | 0.663 | 0.606 |
| 1.654 | 1.634 | 1.561 | 2.131 | 2.268 | 0.449 | 0.606 |
| 4.169 | 4.317 | 5.193 | 3.495 | 3.933 | 0.422 | 0.606 |
| 2.809 | 2.403 | 3.358 | 2.627 | 2.886 | 0.497 | 0.606 |
| 3.129 | 4.197 | 2.484 | 4.346 | 3.602 | 0.654 | 0.606 |
| 4.051 | 3.116 | 5.045 | 3.725 | 3.681 | 0.499 | 0.606 |
| 2.871 | 3.583 | 5.143 | 3.164 | 3.309 | 1.064 | 0.606 |
| 2.168 | 3.813 | 3.389 | 1.336 | 2.258 | 0.655 | 0.606 |
| 6.124 | 6.068 | 5.979 | 6.344 | 6.608 | 0.366 | 0.606 |
| 2.372 | 3.546 | 2.679 | 2.432 | 3.019 | 0.967 | 0.606 |
| 4.617 | 5.431 | 5.921 | 5.598 | 5.219 | 0.456 | 0.606 |
| 2.154 | 2.346 | 1.228 | 2.440 | 2.329 | 0.376 | 0.606 |
| 3.378 | 2.451 | 2.335 | 2.497 | 2.970 | 0.394 | 0.606 |
| 4.666 | 4.985 | 3.521 | 4.906 | 4.559 | 0.682 | 0.606 |
| 3.696 | 3.405 | 3.494 | 3.475 | 3.440 | 0.457 | 0.606 |
| 3.241 | 2.606 | 3.077 | 3.045 | 2.333 | 0.431 | 0.606 |
| 5.492 | 2.692 | 5.188 | 2.426 | 2.747 | 0.827 | 0.606 |
| 7.115 | 7.362 | 6.226 | 7.491 | 7.528 | 0.353 | 0.606 |
| 5.699 | 5.832 | 5.652 | 6.092 | 6.210 | 0.357 | 0.606 |
| 5.141 | 5.312 | 4.197 | 5.481 | 6.323 | 0.644 | 0.606 |
| 3.676 | 3.352 | 1.898 | 3.392 | 4.022 | 0.623 | 0.606 |
| 5.207 | 5.608 | 5.109 | 5.720 | 5.989 | 0.417 | 0.606 |
| 2.412 | 2.147 | 2.141 | 1.960 | 1.547 | 0.530 | 0.606 |
| 8.228 | 8.435 | 8.916 | 7.621 | 7.882 | 0.368 | 0.606 |
| 6.604 | 7.045 | 7.452 | 6.290 | 6.356 | 0.381 | 0.606 |
| 7.056 | 7.480 | 7.804 | 6.573 | 6.774 | 0.386 | 0.606 |
| 6.823 | 7.176 | 7.512 | 6.472 | 6.638 | 0.326 | 0.606 |
| 6.839 | 7.343 | 7.635 | 6.319 | 6.583 | 0.404 | 0.606 |
| 6.728 | 7.109 | 7.504 | 6.427 | 6.628 | 0.325 | 0.606 |
| 4.096 | 3.652 | 4.062 | 4.260 | 4.724 | 0.423 | 0.606 |
| 4.655 | 3.767 | 5.339 | 4.187 | 4.875 | 0.526 | 0.606 |
| 3.763 | 4.271 | 3.592 | 3.897 | 4.915 | 0.626 | 0.606 |
| 2.203 | 2.986 | 3.202 | 2.303 | 2.349 | 0.463 | 0.606 |
| 2.226 | 1.547 | 1.204 | 1.311 | 0.940 | 0.541 | 0.606 |
| 5.494 | 5.727 | 4.655 | 6.777 | 6.112 | 0.435 | 0.606 |
| 3.653 | 3.341 | 4.527 | 3.076 | 2.960 | 0.506 | 0.606 |
| 3.322 | 3.299 | 2.168 | 3.354 | 3.785 | 0.439 | 0.606 |
| 2.720 | 2.736 | 2.286 | 2.717 | 2.580 | 0.410 | 0.606 |
| 1.321 | 1.302 | 1.762 | 1.856 | 1.622 | 0.934 | 0.606 |
| 2.355 | 2.298 | 3.774 | 2.343 | 3.472 | 0.450 | 0.606 |
| 2.035 | 3.640 | 3.001 | 2.941 | 3.045 | 0.493 | 0.606 |
| 5.882 | 5.437 | 6.570 | 5.109 | 5.494 | 0.400 | 0.606 |
| 3.617 | 3.885 | 3.383 | 2.560 | 3.201 | 0.601 | 0.606 |
| 5.599 | 5.713 | 6.311 | 5.662 | 6.247 | 0.318 | 0.606 |
| 2.964 | 2.936 | 2.800 | 2.742 | 2.144 | 0.397 | 0.606 |
| 3.803 | 3.388 | 4.403 | 3.629 | 3.733 | 0.457 | 0.606 |

|       |       |       |        |       |       |       |
|-------|-------|-------|--------|-------|-------|-------|
| 3.383 | 2.282 | 1.940 | 1.694  | 2.211 | 0.895 | 0.606 |
| 3.238 | 3.716 | 1.784 | 4.419  | 3.980 | 0.616 | 0.606 |
| 5.428 | 5.217 | 5.695 | 4.722  | 4.757 | 0.354 | 0.606 |
| 2.304 | 2.074 | 3.235 | 2.697  | 1.982 | 0.479 | 0.606 |
| 3.386 | 4.427 | 2.440 | 4.565  | 3.903 | 0.498 | 0.606 |
| 3.792 | 2.734 | 4.236 | 3.090  | 2.403 | 0.464 | 0.606 |
| 4.300 | 5.240 | 4.276 | 5.668  | 5.176 | 0.404 | 0.606 |
| 4.172 | 3.923 | 3.578 | 4.355  | 4.675 | 0.434 | 0.606 |
| 5.006 | 4.025 | 5.377 | 4.006  | 4.080 | 0.423 | 0.606 |
| 4.510 | 5.498 | 5.147 | 5.851  | 6.020 | 0.442 | 0.606 |
| 2.335 | 2.772 | 2.380 | 1.896  | 2.280 | 0.399 | 0.606 |
| 4.101 | 4.614 | 4.671 | 3.596  | 3.980 | 0.352 | 0.606 |
| 5.440 | 7.001 | 4.978 | 7.418  | 7.124 | 0.580 | 0.606 |
| 6.630 | 7.548 | 5.416 | 8.196  | 7.880 | 0.588 | 0.606 |
| 7.035 | 9.297 | 6.851 | 9.342  | 9.001 | 0.765 | 0.606 |
| 3.202 | 4.010 | 3.410 | 3.824  | 3.911 | 0.365 | 0.606 |
| 5.420 | 4.071 | 5.109 | 2.327  | 4.009 | 0.809 | 0.606 |
| 7.242 | 5.791 | 7.794 | 5.643  | 5.722 | 0.550 | 0.606 |
| 2.698 | 4.495 | 2.725 | 4.251  | 3.450 | 0.643 | 0.606 |
| 5.015 | 5.108 | 4.819 | 4.455  | 5.155 | 0.596 | 0.606 |
| 4.602 | 4.789 | 4.735 | 5.431  | 4.702 | 0.484 | 0.606 |
| 1.789 | 4.738 | 1.462 | 4.693  | 4.585 | 0.868 | 0.606 |
| 5.552 | 4.967 | 6.313 | 5.737  | 5.089 | 0.438 | 0.606 |
| 5.283 | 5.552 | 5.419 | 5.699  | 5.536 | 0.420 | 0.606 |
| 6.514 | 6.580 | 4.715 | 6.881  | 7.408 | 0.654 | 0.606 |
| 5.112 | 5.294 | 4.462 | 6.094  | 5.757 | 0.415 | 0.606 |
| 2.987 | 5.216 | 2.236 | 6.051  | 5.797 | 0.819 | 0.606 |
| 5.991 | 2.810 | 3.173 | 3.471  | 3.344 | 0.772 | 0.606 |
| 5.570 | 5.651 | 6.323 | 5.646  | 5.597 | 0.383 | 0.606 |
| 6.187 | 7.203 | 4.820 | 7.561  | 7.208 | 0.635 | 0.606 |
| 5.551 | 6.291 | 2.512 | 6.418  | 6.232 | 0.749 | 0.606 |
| 4.573 | 5.660 | 3.146 | 5.984  | 5.847 | 0.575 | 0.606 |
| 1.838 | 2.838 | 2.899 | 1.752  | 2.278 | 0.445 | 0.606 |
| 5.388 | 5.738 | 4.746 | 6.288  | 5.914 | 0.456 | 0.606 |
| 5.685 | 6.732 | 2.783 | 7.243  | 6.739 | 0.958 | 0.606 |
| 3.055 | 3.852 | 1.774 | 4.185  | 3.411 | 0.517 | 0.606 |
| 4.013 | 3.804 | 3.170 | 4.111  | 3.922 | 0.495 | 0.606 |
| 3.999 | 5.399 | 2.552 | 5.982  | 4.964 | 0.717 | 0.606 |
| 7.208 | 7.827 | 7.081 | 8.222  | 8.102 | 0.419 | 0.606 |
| 6.453 | 5.615 | 2.888 | 5.762  | 5.635 | 0.724 | 0.606 |
| 6.020 | 6.933 | 4.674 | 7.355  | 7.156 | 0.623 | 0.606 |
| 6.662 | 7.513 | 4.559 | 7.724  | 7.638 | 0.672 | 0.606 |
| 5.693 | 6.804 | 3.089 | 7.404  | 7.253 | 0.821 | 0.606 |
| 3.730 | 5.084 | 2.709 | 5.149  | 4.856 | 0.552 | 0.606 |
| 6.407 | 7.877 | 5.369 | 8.324  | 8.163 | 0.636 | 0.606 |
| 6.809 | 7.443 | 3.804 | 7.795  | 7.799 | 0.979 | 0.606 |
| 7.413 | 9.591 | 4.395 | 10.083 | 9.853 | 1.178 | 0.606 |
| 6.024 | 6.031 | 6.053 | 6.004  | 5.617 | 0.456 | 0.606 |
| 2.157 | 2.563 | 2.955 | 2.342  | 2.305 | 0.523 | 0.606 |
| 3.906 | 5.381 | 1.527 | 5.672  | 5.598 | 0.898 | 0.606 |

|       |        |       |        |        |       |       |
|-------|--------|-------|--------|--------|-------|-------|
| 7.856 | 7.573  | 7.083 | 8.232  | 8.062  | 0.436 | 0.606 |
| 8.531 | 8.821  | 4.406 | 9.097  | 9.065  | 0.875 | 0.606 |
| 5.577 | 5.957  | 4.089 | 6.228  | 6.195  | 0.498 | 0.606 |
| 8.231 | 8.155  | 5.058 | 8.504  | 8.412  | 0.732 | 0.606 |
| 5.696 | 7.880  | 4.831 | 7.892  | 7.932  | 0.770 | 0.606 |
| 5.570 | 4.922  | 6.530 | 4.425  | 4.562  | 0.473 | 0.606 |
| 7.005 | 7.459  | 3.234 | 7.585  | 6.944  | 0.967 | 0.606 |
| 9.543 | 6.661  | 2.303 | 7.393  | 6.928  | 1.411 | 0.606 |
| 5.831 | 4.969  | 5.489 | 4.796  | 5.164  | 0.505 | 0.606 |
| 2.600 | 4.376  | 2.201 | 3.197  | 3.905  | 0.489 | 0.606 |
| 3.187 | 4.000  | 4.232 | 3.645  | 4.004  | 0.391 | 0.606 |
| 4.789 | 5.132  | 3.519 | 4.906  | 5.112  | 0.398 | 0.606 |
| 5.968 | 5.845  | 3.050 | 6.041  | 6.090  | 0.747 | 0.606 |
| 4.601 | 4.981  | 3.326 | 5.076  | 4.750  | 0.448 | 0.606 |
| 6.522 | 7.905  | 5.596 | 8.441  | 8.310  | 0.613 | 0.606 |
| 5.448 | 7.235  | 1.270 | 7.635  | 7.661  | 1.295 | 0.606 |
| 7.132 | 10.497 | 5.590 | 10.683 | 10.509 | 1.133 | 0.606 |
| 7.214 | 8.356  | 5.651 | 8.596  | 8.252  | 0.677 | 0.606 |
| 6.405 | 6.875  | 6.355 | 7.199  | 6.962  | 0.336 | 0.606 |
| 7.833 | 7.798  | 5.973 | 7.625  | 7.982  | 0.529 | 0.606 |
| 7.676 | 8.426  | 7.743 | 8.772  | 8.611  | 0.462 | 0.606 |
| 6.804 | 6.076  | 3.526 | 5.753  | 5.895  | 0.758 | 0.606 |
| 4.748 | 6.674  | 3.956 | 7.319  | 7.441  | 0.820 | 0.606 |
| 4.791 | 6.381  | 3.785 | 6.711  | 6.682  | 0.687 | 0.606 |
| 5.392 | 7.946  | 5.308 | 7.728  | 7.671  | 0.719 | 0.606 |
| 5.242 | 8.027  | 3.211 | 8.171  | 7.692  | 1.133 | 0.606 |
| 8.778 | 8.919  | 8.280 | 9.333  | 9.317  | 0.341 | 0.606 |
| 3.567 | 4.262  | 2.292 | 4.679  | 4.000  | 0.543 | 0.606 |
| 7.874 | 7.646  | 6.716 | 7.943  | 8.150  | 0.387 | 0.606 |
| 7.026 | 7.912  | 6.352 | 7.898  | 7.734  | 0.461 | 0.606 |
| 6.791 | 6.870  | 6.419 | 7.237  | 7.286  | 0.347 | 0.606 |
| 8.095 | 9.655  | 5.956 | 9.729  | 9.624  | 0.800 | 0.606 |
| 2.598 | 2.832  | 2.707 | 2.067  | 2.974  | 0.420 | 0.606 |
| 2.886 | 2.392  | 3.905 | 1.785  | 2.019  | 0.517 | 0.606 |
| 7.962 | 6.719  | 8.205 | 4.963  | 5.601  | 0.738 | 0.606 |
| 6.916 | 6.479  | 5.799 | 6.597  | 6.730  | 0.371 | 0.606 |
| 5.733 | 4.260  | 5.209 | 3.540  | 3.990  | 0.601 | 0.606 |
| 4.571 | 3.990  | 3.786 | 4.253  | 4.313  | 0.412 | 0.606 |
| 3.061 | 2.111  | 2.708 | 1.994  | 2.551  | 0.487 | 0.606 |
| 4.662 | 4.305  | 5.177 | 4.103  | 4.456  | 0.351 | 0.606 |
| 8.052 | 6.383  | 8.347 | 5.281  | 5.616  | 0.810 | 0.606 |
| 5.537 | 6.045  | 2.337 | 7.348  | 5.448  | 1.055 | 0.606 |
| 2.694 | 2.609  | 1.659 | 2.725  | 2.959  | 0.549 | 0.606 |
| 4.126 | 4.656  | 4.560 | 4.665  | 4.249  | 0.475 | 0.606 |
| 3.169 | 3.419  | 3.543 | 3.913  | 4.183  | 0.543 | 0.606 |
| 7.947 | 7.564  | 7.233 | 8.054  | 7.966  | 0.353 | 0.606 |
| 6.457 | 6.496  | 4.297 | 6.837  | 6.697  | 0.621 | 0.606 |
| 1.777 | 1.768  | 2.124 | 1.582  | 2.096  | 0.450 | 0.606 |
| 2.810 | 2.540  | 3.632 | 2.806  | 3.249  | 0.411 | 0.606 |
| 2.207 | 2.199  | 2.667 | 1.641  | 2.768  | 0.473 | 0.606 |

|       |       |       |       |       |       |       |
|-------|-------|-------|-------|-------|-------|-------|
| 1.541 | 2.021 | 2.114 | 1.386 | 1.647 | 0.421 | 0.606 |
| 3.855 | 4.284 | 3.642 | 6.182 | 5.896 | 0.680 | 0.606 |
| 6.617 | 6.768 | 8.164 | 6.406 | 6.609 | 0.444 | 0.606 |
| 2.346 | 2.274 | 3.441 | 2.853 | 2.649 | 0.399 | 0.606 |
| 4.433 | 3.892 | 3.894 | 3.850 | 3.818 | 0.446 | 0.606 |
| 4.512 | 4.822 | 4.574 | 4.477 | 4.449 | 0.419 | 0.606 |
| 7.503 | 7.409 | 8.601 | 6.835 | 6.981 | 0.395 | 0.606 |
| 4.123 | 3.018 | 1.888 | 2.998 | 2.972 | 0.556 | 0.606 |
| 4.385 | 7.308 | 3.004 | 7.546 | 7.375 | 1.145 | 0.606 |
| 2.862 | 3.287 | 3.491 | 3.436 | 3.522 | 0.440 | 0.606 |
| 3.338 | 5.532 | 2.039 | 5.828 | 6.276 | 0.893 | 0.606 |
| 5.767 | 5.928 | 6.920 | 5.139 | 5.461 | 0.428 | 0.606 |
| 2.025 | 3.088 | 3.083 | 3.772 | 3.163 | 0.460 | 0.606 |
| 2.224 | 2.774 | 1.141 | 2.274 | 2.558 | 0.448 | 0.606 |
| 6.131 | 7.048 | 6.142 | 7.150 | 6.975 | 0.382 | 0.606 |
| 4.324 | 3.501 | 4.274 | 3.099 | 3.584 | 0.374 | 0.606 |
| 1.628 | 4.533 | 1.709 | 2.701 | 4.410 | 0.731 | 0.606 |
| 4.592 | 4.453 | 5.076 | 4.974 | 4.945 | 0.444 | 0.606 |
| 2.600 | 2.886 | 2.060 | 2.943 | 2.829 | 0.455 | 0.606 |
| 5.912 | 5.811 | 4.857 | 6.145 | 6.351 | 0.372 | 0.606 |
| 4.031 | 4.624 | 3.871 | 3.585 | 4.428 | 0.485 | 0.606 |
| 5.506 | 4.524 | 5.732 | 4.364 | 4.347 | 0.613 | 0.606 |
| 2.223 | 3.043 | 1.678 | 4.327 | 3.245 | 0.579 | 0.606 |
| 5.674 | 5.884 | 4.371 | 5.852 | 6.514 | 0.456 | 0.606 |
| 2.959 | 1.937 | 2.033 | 2.418 | 1.844 | 0.535 | 0.606 |
| 3.831 | 3.238 | 4.266 | 2.819 | 2.947 | 0.540 | 0.606 |
| 5.417 | 5.752 | 5.449 | 6.040 | 6.224 | 0.333 | 0.606 |
| 2.178 | 2.467 | 2.318 | 2.532 | 2.234 | 0.446 | 0.606 |
| 3.381 | 3.226 | 4.137 | 1.720 | 2.258 | 0.617 | 0.606 |
| 6.600 | 5.886 | 6.337 | 6.275 | 5.967 | 0.420 | 0.606 |
| 6.215 | 5.293 | 5.691 | 5.592 | 5.611 | 0.487 | 0.606 |
| 4.561 | 2.702 | 4.956 | 5.070 | 4.790 | 0.711 | 0.606 |
| 4.948 | 2.894 | 4.929 | 5.143 | 4.817 | 0.799 | 0.606 |
| 6.349 | 5.768 | 7.060 | 6.634 | 6.125 | 0.476 | 0.606 |
| 5.036 | 4.391 | 4.106 | 4.448 | 4.460 | 0.408 | 0.606 |
| 2.235 | 2.681 | 1.810 | 4.017 | 3.567 | 0.538 | 0.606 |
| 5.140 | 5.214 | 4.564 | 5.769 | 5.572 | 0.314 | 0.606 |
| 3.552 | 3.926 | 3.782 | 3.871 | 4.026 | 0.513 | 0.606 |
| 5.206 | 3.543 | 4.305 | 3.373 | 3.773 | 0.463 | 0.606 |
| 4.265 | 3.346 | 3.922 | 3.041 | 3.107 | 0.421 | 0.606 |
| 3.919 | 2.133 | 2.961 | 2.236 | 3.022 | 0.489 | 0.606 |
| 3.582 | 3.706 | 3.266 | 2.289 | 3.245 | 0.531 | 0.606 |
| 3.725 | 2.890 | 2.374 | 3.442 | 2.958 | 0.465 | 0.606 |
| 2.739 | 2.370 | 2.168 | 2.651 | 2.457 | 0.569 | 0.606 |
| 4.067 | 5.474 | 2.217 | 5.806 | 5.271 | 0.768 | 0.606 |
| 3.403 | 1.978 | 2.796 | 2.326 | 2.618 | 0.500 | 0.606 |
| 4.909 | 5.117 | 2.921 | 5.003 | 4.731 | 0.553 | 0.606 |
| 2.796 | 2.243 | 2.188 | 2.326 | 1.856 | 0.551 | 0.606 |
| 3.599 | 5.400 | 3.430 | 5.711 | 5.355 | 0.614 | 0.606 |
| 4.540 | 4.459 | 4.038 | 4.972 | 4.556 | 0.416 | 0.606 |

|       |       |       |       |       |       |       |
|-------|-------|-------|-------|-------|-------|-------|
| 3.435 | 2.855 | 3.090 | 3.769 | 2.883 | 0.487 | 0.606 |
| 4.401 | 3.021 | 2.953 | 4.351 | 3.922 | 0.545 | 0.606 |
| 2.597 | 3.531 | 2.217 | 3.715 | 3.788 | 0.478 | 0.606 |
| 1.934 | 1.617 | 1.613 | 1.285 | 1.475 | 0.637 | 0.606 |
| 3.616 | 2.818 | 2.253 | 3.053 | 3.195 | 0.425 | 0.606 |
| 3.765 | 2.974 | 2.874 | 3.181 | 2.896 | 0.454 | 0.606 |
| 7.966 | 8.430 | 7.334 | 8.777 | 8.556 | 0.369 | 0.606 |
| 1.829 | 1.322 | 1.430 | 1.586 | 1.462 | 0.521 | 0.606 |
| 3.810 | 3.730 | 2.044 | 4.445 | 3.950 | 0.529 | 0.606 |
| 2.025 | 2.543 | 1.387 | 2.506 | 2.353 | 0.380 | 0.606 |
| 2.240 | 2.680 | 1.869 | 3.745 | 3.063 | 0.444 | 0.606 |
| 4.183 | 3.491 | 2.913 | 3.136 | 3.617 | 0.496 | 0.606 |
| 4.260 | 4.570 | 4.366 | 4.317 | 4.736 | 0.447 | 0.606 |
| 4.191 | 4.200 | 3.662 | 4.076 | 4.030 | 0.492 | 0.606 |
| 3.350 | 3.571 | 3.726 | 2.806 | 3.378 | 0.393 | 0.606 |
| 4.000 | 3.662 | 4.398 | 2.736 | 3.948 | 0.541 | 0.606 |
| 2.757 | 1.460 | 2.456 | 1.466 | 1.720 | 0.498 | 0.606 |
| 4.717 | 6.345 | 4.684 | 6.441 | 6.044 | 0.482 | 0.606 |
| 3.908 | 4.363 | 3.942 | 4.869 | 4.628 | 0.413 | 0.606 |
| 2.632 | 2.418 | 3.189 | 3.741 | 3.617 | 0.516 | 0.606 |
| 2.112 | 4.692 | 2.154 | 5.700 | 5.115 | 0.836 | 0.606 |
| 2.626 | 4.300 | 2.414 | 5.103 | 4.742 | 0.574 | 0.606 |
| 2.494 | 3.064 | 2.750 | 2.824 | 3.109 | 0.531 | 0.606 |
| 4.702 | 4.902 | 6.566 | 4.981 | 3.846 | 1.030 | 0.606 |
| 2.301 | 2.150 | 2.398 | 1.746 | 1.788 | 0.619 | 0.606 |
| 2.396 | 3.453 | 2.997 | 2.951 | 2.291 | 0.561 | 0.606 |
| 1.911 | 2.217 | 1.645 | 1.381 | 1.582 | 0.632 | 0.606 |
| 3.313 | 1.533 | 3.225 | 2.868 | 2.806 | 0.586 | 0.606 |
| 4.173 | 3.223 | 3.195 | 3.411 | 4.114 | 0.443 | 0.606 |
| 4.107 | 4.712 | 1.638 | 5.076 | 4.579 | 0.710 | 0.606 |
| 3.726 | 3.953 | 5.160 | 4.082 | 3.893 | 0.603 | 0.606 |
| 3.008 | 2.656 | 1.924 | 3.627 | 3.400 | 0.419 | 0.606 |
| 2.905 | 1.941 | 2.821 | 1.977 | 1.475 | 0.472 | 0.606 |
| 4.771 | 4.951 | 4.925 | 3.844 | 4.738 | 0.475 | 0.606 |
| 3.484 | 4.180 | 3.075 | 3.615 | 4.060 | 0.476 | 0.606 |
| 6.413 | 6.253 | 5.835 | 6.480 | 6.470 | 0.306 | 0.606 |
| 4.235 | 4.235 | 3.391 | 4.669 | 4.935 | 0.420 | 0.606 |
| 5.450 | 3.935 | 6.157 | 3.299 | 4.113 | 0.694 | 0.606 |
| 2.671 | 3.914 | 2.881 | 3.469 | 3.276 | 0.440 | 0.606 |
| 3.026 | 4.293 | 3.416 | 4.406 | 4.209 | 0.401 | 0.606 |
| 6.194 | 6.251 | 7.118 | 6.057 | 6.143 | 0.408 | 0.606 |
| 1.612 | 2.971 | 1.900 | 3.156 | 2.685 | 0.483 | 0.606 |
| 4.709 | 4.734 | 3.991 | 5.032 | 4.742 | 0.423 | 0.606 |
| 8.103 | 7.495 | 8.825 | 7.646 | 7.431 | 0.439 | 0.606 |
| 3.215 | 3.635 | 3.546 | 2.572 | 3.371 | 0.705 | 0.606 |
| 2.600 | 2.446 | 3.114 | 2.763 | 2.748 | 0.420 | 0.606 |
| 3.611 | 5.000 | 4.171 | 4.800 | 4.809 | 0.433 | 0.606 |
| 5.432 | 6.316 | 6.034 | 6.557 | 6.389 | 0.336 | 0.606 |
| 3.032 | 3.888 | 1.791 | 4.340 | 4.283 | 0.605 | 0.606 |
| 3.499 | 3.651 | 4.228 | 3.062 | 3.699 | 0.455 | 0.606 |

|       |       |       |       |       |       |       |
|-------|-------|-------|-------|-------|-------|-------|
| 3.542 | 3.572 | 4.162 | 3.444 | 3.953 | 0.492 | 0.606 |
| 5.217 | 6.438 | 6.778 | 4.287 | 5.595 | 0.818 | 0.606 |
| 4.779 | 4.747 | 4.139 | 4.434 | 4.635 | 0.416 | 0.606 |
| 3.820 | 6.841 | 6.328 | 3.832 | 5.553 | 1.160 | 0.606 |
| 7.675 | 6.993 | 8.020 | 6.632 | 6.843 | 0.415 | 0.606 |
| 2.827 | 3.309 | 4.259 | 4.068 | 3.654 | 0.865 | 0.606 |
| 2.739 | 3.079 | 3.694 | 3.592 | 4.235 | 1.108 | 0.606 |
| 4.250 | 4.694 | 4.282 | 3.324 | 4.498 | 0.775 | 0.606 |
| 7.678 | 8.686 | 7.021 | 8.915 | 8.650 | 0.486 | 0.606 |
| 1.954 | 2.069 | 1.477 | 1.439 | 3.014 | 0.554 | 0.606 |
| 7.574 | 6.458 | 9.018 | 4.912 | 5.647 | 0.784 | 0.606 |
| 3.851 | 3.211 | 3.450 | 2.622 | 2.618 | 0.626 | 0.606 |
| 5.233 | 3.811 | 3.150 | 4.284 | 3.481 | 0.706 | 0.606 |
| 3.425 | 3.300 | 2.653 | 3.783 | 4.199 | 0.450 | 0.606 |
| 3.301 | 4.483 | 4.295 | 3.269 | 3.856 | 0.705 | 0.606 |
| 3.043 | 3.867 | 3.330 | 2.362 | 2.751 | 0.515 | 0.606 |
| 2.756 | 2.311 | 2.779 | 1.364 | 1.828 | 0.514 | 0.606 |
| 2.645 | 3.097 | 3.606 | 2.217 | 2.695 | 0.536 | 0.606 |
| 6.003 | 5.299 | 5.660 | 4.822 | 6.329 | 0.563 | 0.606 |
| 5.052 | 5.226 | 6.265 | 3.161 | 4.596 | 0.676 | 0.606 |
| 3.734 | 4.188 | 5.476 | 3.143 | 3.740 | 0.655 | 0.606 |
| 3.194 | 3.395 | 3.696 | 2.890 | 3.153 | 0.463 | 0.606 |
| 4.083 | 3.121 | 3.853 | 3.526 | 3.259 | 0.419 | 0.606 |
| 5.867 | 5.228 | 6.563 | 2.692 | 2.749 | 0.966 | 0.606 |
| 2.814 | 2.263 | 4.987 | 1.841 | 1.596 | 0.821 | 0.606 |
| 0.999 | 1.468 | 1.451 | 1.135 | 1.237 | 0.460 | 0.606 |
| 2.986 | 2.368 | 2.586 | 2.590 | 2.270 | 0.443 | 0.606 |
| 5.597 | 6.360 | 6.857 | 5.196 | 5.934 | 0.504 | 0.606 |
| 4.052 | 3.641 | 4.114 | 3.561 | 3.463 | 0.350 | 0.606 |
| 5.731 | 5.888 | 5.511 | 5.184 | 5.284 | 0.309 | 0.606 |
| 7.969 | 8.495 | 8.744 | 6.385 | 7.846 | 0.660 | 0.606 |
| 1.292 | 1.648 | 1.548 | 1.067 | 0.841 | 0.751 | 0.606 |
| 5.923 | 5.856 | 5.732 | 3.143 | 4.776 | 0.651 | 0.606 |
| 3.107 | 3.207 | 3.481 | 3.052 | 2.749 | 0.296 | 0.606 |
| 3.988 | 4.240 | 5.231 | 3.213 | 3.205 | 0.458 | 0.606 |
| 6.484 | 5.662 | 4.246 | 5.984 | 6.158 | 0.468 | 0.606 |
| 3.008 | 3.096 | 3.475 | 2.008 | 2.790 | 0.727 | 0.606 |
| 4.508 | 4.887 | 5.636 | 3.165 | 4.068 | 0.737 | 0.606 |
| 3.712 | 4.202 | 4.944 | 2.891 | 3.258 | 0.465 | 0.606 |
| 4.748 | 5.150 | 5.449 | 3.661 | 5.285 | 0.536 | 0.606 |
| 5.246 | 4.449 | 5.498 | 3.803 | 4.082 | 0.565 | 0.606 |
| 8.669 | 8.367 | 9.064 | 7.122 | 8.050 | 0.562 | 0.606 |
| 3.533 | 3.588 | 3.727 | 3.097 | 3.638 | 0.407 | 0.606 |
| 4.683 | 4.992 | 4.710 | 5.235 | 5.189 | 0.332 | 0.606 |
| 5.171 | 3.834 | 6.264 | 3.613 | 3.609 | 0.784 | 0.606 |
| 5.047 | 6.549 | 5.530 | 6.704 | 6.494 | 0.452 | 0.606 |
| 5.360 | 4.879 | 5.660 | 3.301 | 3.785 | 0.530 | 0.606 |
| 4.120 | 3.715 | 5.663 | 2.957 | 3.289 | 0.531 | 0.606 |
| 5.752 | 5.458 | 5.934 | 5.419 | 5.354 | 0.379 | 0.606 |
| 2.874 | 3.857 | 3.628 | 3.785 | 3.982 | 0.323 | 0.606 |



|       |       |       |       |       |       |       |
|-------|-------|-------|-------|-------|-------|-------|
| 4.619 | 5.977 | 4.610 | 5.789 | 6.128 | 0.593 | 0.606 |
| 2.896 | 3.625 | 5.071 | 3.083 | 3.543 | 0.541 | 0.606 |
| 3.146 | 2.873 | 3.082 | 3.139 | 2.448 | 0.482 | 0.606 |
| 4.501 | 3.259 | 3.105 | 3.621 | 3.839 | 0.613 | 0.606 |
| 6.341 | 7.623 | 4.634 | 8.060 | 7.962 | 0.689 | 0.606 |
| 3.931 | 3.946 | 1.616 | 4.710 | 5.040 | 0.715 | 0.606 |
| 6.600 | 7.956 | 4.730 | 8.092 | 8.040 | 0.790 | 0.606 |
| 5.512 | 6.107 | 2.765 | 6.505 | 6.490 | 0.804 | 0.606 |
| 5.194 | 5.436 | 6.964 | 3.477 | 3.674 | 0.884 | 0.606 |
| 7.144 | 6.369 | 7.510 | 6.403 | 6.698 | 0.432 | 0.606 |
| 4.131 | 5.816 | 2.559 | 6.295 | 6.077 | 0.749 | 0.606 |
| 3.095 | 2.955 | 3.738 | 2.879 | 2.421 | 0.430 | 0.606 |
| 2.660 | 3.894 | 2.642 | 3.528 | 4.080 | 0.587 | 0.606 |
| 4.193 | 4.193 | 4.108 | 4.975 | 5.067 | 0.419 | 0.606 |
| 6.053 | 6.076 | 5.635 | 6.150 | 6.723 | 0.431 | 0.606 |
| 5.196 | 4.917 | 2.367 | 5.331 | 5.680 | 0.680 | 0.606 |
| 6.959 | 7.606 | 6.521 | 8.255 | 7.735 | 0.582 | 0.606 |
| 3.168 | 6.146 | 1.803 | 6.485 | 6.856 | 1.110 | 0.606 |
| 5.250 | 5.091 | 3.667 | 5.116 | 4.465 | 0.495 | 0.606 |
| 8.056 | 8.897 | 5.962 | 9.396 | 9.347 | 0.697 | 0.606 |
| 6.784 | 5.161 | 7.039 | 4.209 | 4.057 | 0.707 | 0.606 |
| 3.511 | 4.717 | 4.362 | 4.124 | 4.174 | 0.427 | 0.606 |
| 4.624 | 5.629 | 3.680 | 5.872 | 5.189 | 0.471 | 0.606 |
| 4.047 | 4.190 | 4.952 | 3.996 | 3.626 | 0.511 | 0.606 |
| 6.446 | 7.123 | 5.549 | 7.296 | 7.190 | 0.426 | 0.606 |
| 5.880 | 6.997 | 4.030 | 7.143 | 6.935 | 0.759 | 0.606 |
| 5.129 | 5.431 | 3.989 | 5.901 | 5.603 | 0.571 | 0.606 |
| 5.646 | 4.631 | 6.434 | 4.878 | 4.680 | 0.443 | 0.606 |
| 4.793 | 4.699 | 4.528 | 5.491 | 5.280 | 0.347 | 0.606 |
| 3.203 | 3.696 | 3.807 | 4.672 | 4.727 | 0.453 | 0.606 |
| 5.431 | 6.049 | 5.354 | 6.106 | 6.135 | 0.397 | 0.606 |
| 6.595 | 8.167 | 6.862 | 8.443 | 8.095 | 0.473 | 0.606 |
| 3.468 | 3.913 | 4.103 | 3.519 | 3.497 | 0.593 | 0.606 |
| 5.582 | 4.776 | 6.398 | 3.883 | 3.778 | 0.628 | 0.606 |
| 5.433 | 5.451 | 4.946 | 5.779 | 5.631 | 0.327 | 0.606 |
| 2.562 | 2.948 | 2.767 | 1.985 | 2.763 | 0.420 | 0.606 |
| 2.022 | 2.862 | 3.878 | 2.343 | 2.684 | 0.467 | 0.606 |
| 5.289 | 5.791 | 4.489 | 5.911 | 5.754 | 0.452 | 0.606 |
| 2.393 | 2.440 | 1.756 | 2.813 | 2.464 | 0.394 | 0.606 |
| 3.305 | 2.633 | 3.232 | 2.900 | 2.868 | 0.473 | 0.606 |
| 6.629 | 7.344 | 5.577 | 7.628 | 7.935 | 0.499 | 0.606 |
| 4.232 | 4.096 | 3.596 | 4.589 | 4.325 | 0.392 | 0.606 |
| 5.254 | 5.366 | 3.566 | 5.927 | 5.615 | 0.507 | 0.606 |
| 5.908 | 5.087 | 6.390 | 4.146 | 4.572 | 0.492 | 0.606 |
| 3.834 | 2.859 | 4.149 | 3.597 | 3.552 | 0.437 | 0.606 |
| 6.180 | 6.599 | 2.808 | 6.830 | 6.972 | 0.862 | 0.606 |
| 5.157 | 6.723 | 4.642 | 7.068 | 6.738 | 0.584 | 0.606 |
| 3.872 | 5.688 | 3.454 | 6.246 | 5.866 | 0.718 | 0.606 |
| 4.479 | 3.903 | 4.632 | 3.940 | 3.929 | 0.476 | 0.606 |
| 3.981 | 4.722 | 4.011 | 4.381 | 4.116 | 0.424 | 0.606 |

|       |       |       |       |       |       |       |
|-------|-------|-------|-------|-------|-------|-------|
| 5.156 | 6.813 | 6.476 | 5.628 | 5.648 | 0.599 | 0.606 |
| 4.363 | 3.470 | 4.312 | 2.756 | 3.753 | 0.504 | 0.606 |
| 5.153 | 3.789 | 5.523 | 3.607 | 3.416 | 0.578 | 0.606 |
| 3.704 | 4.260 | 3.007 | 4.911 | 4.519 | 0.485 | 0.606 |
| 3.445 | 3.033 | 4.215 | 3.599 | 2.926 | 0.473 | 0.606 |
| 6.747 | 8.186 | 6.980 | 8.817 | 8.354 | 0.469 | 0.606 |
| 4.566 | 5.820 | 2.460 | 6.191 | 5.263 | 0.723 | 0.606 |
| 7.189 | 7.928 | 4.111 | 8.476 | 7.908 | 0.902 | 0.606 |
| 5.456 | 6.501 | 3.139 | 7.306 | 6.702 | 0.796 | 0.606 |
| 3.566 | 4.704 | 2.796 | 4.664 | 4.553 | 0.504 | 0.606 |
| 4.335 | 4.777 | 3.005 | 4.727 | 6.269 | 0.965 | 0.606 |
| 6.341 | 6.555 | 4.850 | 7.165 | 7.032 | 0.564 | 0.606 |
| 5.681 | 4.972 | 5.774 | 4.968 | 4.590 | 0.387 | 0.606 |
| 4.629 | 5.242 | 5.258 | 5.230 | 5.833 | 0.392 | 0.606 |
| 4.283 | 4.624 | 3.959 | 4.850 | 4.886 | 0.387 | 0.606 |
| 3.798 | 4.115 | 3.939 | 4.458 | 4.270 | 0.360 | 0.606 |
| 3.771 | 4.165 | 2.630 | 4.367 | 4.062 | 0.457 | 0.606 |
| 5.428 | 6.240 | 6.028 | 6.319 | 5.975 | 0.381 | 0.606 |
| 5.551 | 6.288 | 4.304 | 6.270 | 6.063 | 0.520 | 0.606 |
| 4.852 | 5.477 | 3.817 | 6.439 | 5.858 | 0.584 | 0.606 |
| 6.531 | 5.839 | 7.265 | 6.202 | 6.507 | 0.456 | 0.606 |
| 3.359 | 3.125 | 3.364 | 3.876 | 3.473 | 0.412 | 0.606 |
| 4.245 | 4.302 | 3.785 | 4.557 | 4.327 | 0.360 | 0.606 |
| 5.554 | 5.321 | 6.651 | 5.155 | 5.296 | 0.433 | 0.606 |
| 6.960 | 7.108 | 7.826 | 7.062 | 7.061 | 0.368 | 0.606 |
| 7.886 | 6.622 | 7.983 | 4.786 | 5.080 | 0.715 | 0.606 |
| 2.353 | 2.249 | 1.517 | 3.328 | 3.029 | 0.508 | 0.606 |
| 4.833 | 4.667 | 5.713 | 3.327 | 3.444 | 0.520 | 0.606 |
| 6.885 | 8.055 | 6.731 | 8.690 | 8.304 | 0.470 | 0.606 |
| 2.150 | 2.821 | 2.604 | 2.331 | 3.162 | 0.526 | 0.606 |
| 2.616 | 2.853 | 3.072 | 2.797 | 3.698 | 0.462 | 0.606 |
| 5.785 | 5.797 | 6.962 | 5.403 | 5.532 | 0.505 | 0.606 |
| 2.937 | 3.699 | 2.896 | 2.963 | 4.037 | 0.515 | 0.606 |
| 3.180 | 4.418 | 4.231 | 3.851 | 3.763 | 0.608 | 0.606 |
| 3.473 | 4.469 | 4.405 | 3.894 | 5.580 | 0.778 | 0.606 |
| 2.950 | 3.223 | 2.734 | 1.986 | 2.799 | 0.608 | 0.606 |
| 2.578 | 3.192 | 2.798 | 3.640 | 3.666 | 0.357 | 0.606 |
| 6.253 | 6.018 | 7.173 | 5.349 | 5.743 | 0.410 | 0.606 |
| 4.830 | 4.285 | 5.355 | 3.870 | 4.390 | 0.397 | 0.606 |
| 1.889 | 2.176 | 1.917 | 2.367 | 1.965 | 0.429 | 0.606 |
| 2.824 | 3.061 | 4.105 | 2.862 | 3.310 | 0.533 | 0.606 |
| 2.838 | 2.200 | 3.458 | 2.127 | 2.127 | 0.428 | 0.606 |
| 4.530 | 5.056 | 3.450 | 5.592 | 5.278 | 0.480 | 0.606 |
| 3.938 | 4.143 | 4.483 | 3.019 | 3.721 | 0.745 | 0.606 |
| 4.819 | 4.755 | 3.190 | 5.281 | 4.705 | 0.625 | 0.606 |
| 3.930 | 3.925 | 3.036 | 3.822 | 4.725 | 0.625 | 0.606 |
| 5.324 | 4.043 | 5.898 | 3.183 | 2.504 | 0.770 | 0.606 |
| 4.509 | 4.073 | 3.390 | 3.967 | 4.713 | 0.437 | 0.606 |
| 3.666 | 4.738 | 2.635 | 4.519 | 4.618 | 0.489 | 0.606 |
| 2.607 | 1.471 | 1.406 | 1.692 | 1.614 | 0.537 | 0.606 |

|       |        |       |       |       |       |       |
|-------|--------|-------|-------|-------|-------|-------|
| 4.050 | 4.763  | 4.939 | 4.664 | 4.680 | 0.445 | 0.606 |
| 2.506 | 2.708  | 2.509 | 3.121 | 3.140 | 0.405 | 0.606 |
| 6.419 | 5.799  | 6.793 | 5.394 | 5.186 | 0.417 | 0.606 |
| 7.021 | 7.393  | 5.142 | 7.778 | 7.481 | 0.591 | 0.606 |
| 6.099 | 7.377  | 2.277 | 7.787 | 7.179 | 1.080 | 0.606 |
| 6.659 | 5.089  | 6.690 | 4.683 | 4.749 | 0.531 | 0.606 |
| 3.236 | 2.377  | 2.515 | 2.221 | 2.386 | 0.521 | 0.606 |
| 2.066 | 2.625  | 1.659 | 1.679 | 2.058 | 0.519 | 0.606 |
| 2.301 | 2.267  | 2.331 | 2.293 | 2.255 | 0.526 | 0.606 |
| 5.848 | 6.684  | 2.416 | 6.966 | 6.490 | 0.976 | 0.606 |
| 5.470 | 5.038  | 2.078 | 5.817 | 5.572 | 0.835 | 0.606 |
| 6.201 | 10.091 | 5.284 | 6.344 | 5.911 | 1.265 | 0.606 |
| 2.514 | 5.412  | 3.385 | 2.791 | 2.600 | 1.159 | 0.606 |
| 6.194 | 6.246  | 5.655 | 6.889 | 6.628 | 0.350 | 0.606 |
| 1.556 | 2.463  | 2.231 | 2.178 | 2.796 | 0.543 | 0.606 |
| 6.765 | 5.955  | 7.676 | 6.000 | 5.628 | 0.444 | 0.606 |
| 6.757 | 7.448  | 6.016 | 7.999 | 7.856 | 0.432 | 0.606 |
| 4.202 | 4.702  | 3.931 | 4.932 | 5.085 | 0.400 | 0.606 |
| 6.170 | 6.846  | 5.834 | 7.079 | 7.013 | 0.374 | 0.606 |
| 4.674 | 5.849  | 4.412 | 6.290 | 6.145 | 0.497 | 0.606 |
| 4.484 | 6.583  | 4.185 | 6.838 | 6.910 | 0.670 | 0.606 |
| 3.869 | 2.052  | 1.863 | 1.466 | 1.738 | 0.557 | 0.606 |
| 3.001 | 3.838  | 3.187 | 3.236 | 3.955 | 0.390 | 0.606 |
| 4.285 | 4.003  | 6.145 | 4.010 | 4.199 | 0.453 | 0.606 |
| 2.507 | 4.154  | 2.339 | 4.218 | 4.058 | 0.528 | 0.606 |
| 4.250 | 6.536  | 4.822 | 6.806 | 6.959 | 0.830 | 0.606 |
| 1.615 | 4.654  | 2.300 | 4.371 | 4.455 | 0.758 | 0.606 |
| 5.731 | 3.813  | 2.693 | 4.303 | 4.621 | 0.657 | 0.606 |
| 2.461 | 4.679  | 2.536 | 5.362 | 5.319 | 0.744 | 0.606 |
| 2.761 | 4.729  | 2.384 | 4.279 | 4.719 | 0.578 | 0.606 |
| 2.884 | 1.537  | 1.058 | 2.215 | 2.148 | 1.370 | 0.606 |
| 2.577 | 2.564  | 1.753 | 2.870 | 2.479 | 0.537 | 0.606 |
| 2.950 | 4.240  | 2.405 | 3.134 | 2.774 | 0.453 | 0.606 |
| 2.578 | 3.611  | 2.419 | 3.383 | 3.332 | 0.407 | 0.606 |
| 3.517 | 2.879  | 1.925 | 3.347 | 4.123 | 0.639 | 0.606 |
| 5.242 | 5.190  | 3.023 | 5.251 | 5.458 | 0.613 | 0.606 |
| 4.650 | 6.113  | 4.258 | 6.416 | 5.807 | 0.602 | 0.606 |
| 3.229 | 4.262  | 3.634 | 4.337 | 4.034 | 0.371 | 0.606 |
| 3.175 | 3.183  | 3.529 | 2.790 | 3.173 | 0.400 | 0.606 |
| 6.218 | 6.863  | 5.790 | 7.213 | 7.143 | 0.417 | 0.606 |
| 6.035 | 5.936  | 7.672 | 5.023 | 5.028 | 0.626 | 0.606 |
| 6.122 | 5.366  | 6.809 | 3.786 | 4.409 | 0.645 | 0.606 |
| 3.751 | 2.771  | 4.517 | 3.296 | 2.121 | 0.586 | 0.606 |
| 2.812 | 4.325  | 2.425 | 4.855 | 4.627 | 0.649 | 0.606 |
| 6.858 | 5.814  | 6.916 | 5.278 | 5.155 | 0.546 | 0.606 |
| 4.753 | 4.690  | 3.281 | 5.092 | 5.311 | 0.463 | 0.606 |
| 4.911 | 4.874  | 4.324 | 3.819 | 4.285 | 0.386 | 0.606 |
| 2.237 | 3.372  | 2.249 | 3.354 | 3.439 | 0.397 | 0.606 |
| 3.490 | 3.973  | 4.159 | 3.421 | 3.702 | 0.435 | 0.606 |
| 3.647 | 5.045  | 3.879 | 4.794 | 4.835 | 0.460 | 0.606 |

|       |       |       |       |       |       |       |
|-------|-------|-------|-------|-------|-------|-------|
| 4.960 | 4.091 | 5.554 | 3.266 | 3.743 | 0.593 | 0.606 |
| 4.401 | 4.135 | 5.064 | 3.835 | 3.567 | 0.525 | 0.606 |
| 2.604 | 4.074 | 3.921 | 3.839 | 3.868 | 0.462 | 0.606 |
| 8.422 | 7.975 | 7.731 | 7.588 | 8.325 | 0.472 | 0.606 |
| 6.540 | 7.122 | 6.296 | 7.448 | 7.324 | 0.343 | 0.606 |
| 4.291 | 4.330 | 3.536 | 4.712 | 4.715 | 0.418 | 0.606 |
| 2.074 | 2.600 | 2.467 | 2.630 | 1.833 | 0.532 | 0.606 |
| 5.570 | 6.642 | 3.825 | 6.725 | 6.353 | 0.614 | 0.606 |
| 4.024 | 3.634 | 2.374 | 3.646 | 3.557 | 0.450 | 0.606 |
| 4.868 | 6.099 | 3.941 | 6.471 | 6.382 | 0.671 | 0.606 |
| 5.142 | 5.046 | 4.013 | 5.518 | 5.341 | 0.454 | 0.606 |
| 1.680 | 2.518 | 2.625 | 2.185 | 2.229 | 0.504 | 0.606 |
| 7.174 | 6.968 | 2.254 | 7.401 | 7.262 | 1.082 | 0.606 |
| 5.966 | 4.522 | 4.625 | 4.771 | 4.850 | 0.467 | 0.606 |
| 5.844 | 3.065 | 6.035 | 3.209 | 2.779 | 0.873 | 0.606 |
| 2.784 | 3.337 | 2.657 | 3.373 | 2.908 | 0.400 | 0.606 |
| 5.474 | 4.820 | 6.280 | 4.400 | 4.862 | 0.543 | 0.606 |
| 7.912 | 7.999 | 8.042 | 8.150 | 8.026 | 0.308 | 0.606 |
| 5.623 | 6.394 | 6.464 | 7.219 | 7.429 | 0.485 | 0.606 |
| 5.630 | 5.701 | 6.976 | 3.395 | 3.558 | 0.730 | 0.606 |
| 3.013 | 3.329 | 4.248 | 2.830 | 2.652 | 0.408 | 0.606 |
| 2.182 | 2.590 | 1.992 | 2.767 | 2.688 | 0.381 | 0.606 |
| 2.403 | 2.542 | 2.234 | 2.345 | 2.666 | 0.473 | 0.606 |
| 3.154 | 2.898 | 3.038 | 3.569 | 2.929 | 0.398 | 0.606 |
| 3.239 | 3.171 | 3.957 | 2.798 | 3.150 | 0.429 | 0.606 |
| 8.777 | 8.518 | 9.607 | 7.029 | 7.475 | 0.558 | 0.606 |
| 3.503 | 3.093 | 3.091 | 2.942 | 2.980 | 0.598 | 0.606 |
| 3.800 | 3.285 | 2.324 | 3.287 | 3.241 | 0.549 | 0.606 |
| 3.795 | 4.059 | 3.739 | 3.268 | 4.343 | 0.610 | 0.606 |
| 3.112 | 2.678 | 2.993 | 2.469 | 2.578 | 0.409 | 0.606 |
| 6.998 | 7.097 | 4.246 | 6.855 | 7.360 | 0.713 | 0.606 |
| 2.213 | 2.500 | 1.971 | 2.509 | 2.297 | 0.420 | 0.606 |
| 4.038 | 1.547 | 4.905 | 1.101 | 1.819 | 0.874 | 0.606 |
| 5.192 | 4.308 | 4.699 | 2.551 | 3.401 | 0.745 | 0.606 |
| 2.720 | 2.437 | 3.233 | 2.068 | 2.063 | 0.548 | 0.606 |
| 4.182 | 3.308 | 2.160 | 4.051 | 3.846 | 0.573 | 0.606 |
| 5.490 | 5.975 | 6.064 | 5.140 | 5.947 | 0.403 | 0.606 |
| 5.503 | 6.071 | 6.140 | 5.160 | 6.001 | 0.417 | 0.606 |
| 5.503 | 6.019 | 6.064 | 5.123 | 5.961 | 0.408 | 0.606 |
| 4.509 | 4.926 | 5.129 | 4.738 | 4.911 | 0.341 | 0.606 |
| 4.761 | 5.031 | 5.112 | 4.331 | 4.865 | 0.348 | 0.606 |
| 4.271 | 4.141 | 3.032 | 4.289 | 5.760 | 0.672 | 0.606 |
| 1.532 | 1.751 | 1.686 | 1.908 | 1.819 | 0.370 | 0.606 |
| 8.418 | 8.753 | 9.406 | 7.051 | 7.463 | 0.533 | 0.606 |
| 2.914 | 2.896 | 2.327 | 2.770 | 3.593 | 0.578 | 0.606 |
| 6.220 | 5.800 | 7.150 | 4.458 | 4.457 | 0.620 | 0.606 |
| 4.749 | 4.393 | 3.528 | 4.078 | 4.713 | 0.584 | 0.606 |
| 5.458 | 5.720 | 6.110 | 5.269 | 4.902 | 0.391 | 0.606 |
| 4.131 | 3.746 | 3.581 | 3.755 | 3.957 | 0.448 | 0.606 |
| 4.635 | 4.281 | 4.941 | 3.678 | 3.844 | 0.408 | 0.606 |

|        |       |        |       |       |       |       |
|--------|-------|--------|-------|-------|-------|-------|
| 6.652  | 7.176 | 6.838  | 7.773 | 7.654 | 0.365 | 0.606 |
| 9.021  | 9.652 | 8.243  | 9.606 | 9.630 | 0.387 | 0.606 |
| 6.894  | 7.437 | 3.572  | 7.609 | 7.510 | 0.938 | 0.606 |
| 6.453  | 6.597 | 3.374  | 6.788 | 6.639 | 0.799 | 0.606 |
| 6.844  | 6.725 | 5.588  | 7.033 | 6.677 | 0.393 | 0.606 |
| 4.070  | 3.279 | 4.558  | 2.669 | 3.405 | 0.446 | 0.606 |
| 3.750  | 2.517 | 1.964  | 3.614 | 3.325 | 0.603 | 0.606 |
| 4.519  | 5.343 | 2.550  | 5.709 | 5.223 | 0.676 | 0.606 |
| 6.390  | 7.534 | 4.301  | 7.780 | 7.968 | 0.867 | 0.606 |
| 5.890  | 7.135 | 3.760  | 7.327 | 7.563 | 0.915 | 0.606 |
| 2.735  | 2.534 | 2.003  | 2.609 | 2.797 | 0.441 | 0.606 |
| 6.627  | 6.662 | 5.641  | 6.778 | 6.858 | 0.380 | 0.606 |
| 4.631  | 4.259 | 5.206  | 3.464 | 4.349 | 0.511 | 0.606 |
| 3.982  | 4.379 | 5.386  | 3.764 | 4.254 | 0.450 | 0.606 |
| 6.966  | 5.374 | 7.891  | 4.034 | 5.097 | 0.860 | 0.606 |
| 3.458  | 3.599 | 3.735  | 2.504 | 3.501 | 0.598 | 0.606 |
| 4.617  | 4.243 | 4.029  | 4.422 | 4.711 | 0.370 | 0.606 |
| 10.765 | 9.923 | 10.237 | 7.593 | 8.487 | 0.791 | 0.606 |
| 5.844  | 6.359 | 6.289  | 6.772 | 6.846 | 0.382 | 0.606 |
| 3.530  | 3.161 | 1.658  | 2.979 | 3.014 | 0.702 | 0.606 |
| 2.594  | 3.167 | 1.467  | 4.239 | 2.817 | 0.590 | 0.606 |
| 4.557  | 5.513 | 2.951  | 5.382 | 5.276 | 0.569 | 0.606 |
| 3.235  | 3.609 | 2.968  | 3.038 | 3.766 | 0.384 | 0.606 |
| 6.641  | 8.737 | 6.005  | 9.256 | 9.069 | 0.743 | 0.606 |
| 4.713  | 3.890 | 6.115  | 3.480 | 3.992 | 0.549 | 0.606 |
| 3.965  | 5.298 | 3.526  | 4.691 | 4.670 | 0.645 | 0.606 |
| 4.816  | 5.800 | 6.327  | 4.205 | 4.634 | 0.583 | 0.606 |
| 7.049  | 7.712 | 7.956  | 6.831 | 6.970 | 0.467 | 0.606 |
| 4.870  | 5.734 | 2.686  | 6.148 | 6.046 | 0.731 | 0.606 |
| 4.761  | 4.410 | 6.378  | 3.582 | 3.886 | 0.691 | 0.606 |
| 10.175 | 9.444 | 10.621 | 7.872 | 8.650 | 0.610 | 0.606 |
| 6.839  | 7.813 | 3.486  | 8.540 | 8.062 | 0.927 | 0.606 |
| 6.853  | 7.780 | 3.055  | 8.419 | 7.906 | 0.972 | 0.606 |
| 5.125  | 5.989 | 4.871  | 6.056 | 6.181 | 0.379 | 0.606 |
| 5.719  | 6.749 | 5.181  | 7.123 | 6.661 | 0.484 | 0.606 |
| 7.210  | 6.811 | 7.456  | 7.260 | 7.365 | 0.465 | 0.606 |
| 8.356  | 7.150 | 9.296  | 6.449 | 6.389 | 0.640 | 0.606 |
| 5.895  | 6.560 | 6.161  | 7.339 | 6.742 | 0.592 | 0.606 |
| 4.491  | 5.816 | 3.083  | 6.081 | 6.211 | 0.767 | 0.606 |
| 3.217  | 4.336 | 2.005  | 5.445 | 5.407 | 0.685 | 0.606 |
| 3.160  | 2.521 | 1.570  | 2.816 | 3.218 | 0.549 | 0.606 |
| 7.491  | 7.889 | 5.448  | 7.867 | 7.839 | 0.555 | 0.606 |
| 7.901  | 8.341 | 5.561  | 8.757 | 8.518 | 0.682 | 0.606 |
| 4.471  | 4.201 | 4.633  | 4.695 | 4.551 | 0.368 | 0.606 |
| 8.190  | 7.020 | 8.648  | 6.480 | 6.531 | 0.592 | 0.606 |
| 6.626  | 7.470 | 5.281  | 8.019 | 8.132 | 0.707 | 0.606 |
| 3.567  | 4.737 | 3.827  | 4.755 | 4.977 | 0.488 | 0.606 |
| 4.607  | 4.755 | 4.208  | 4.782 | 4.971 | 0.375 | 0.606 |
| 3.707  | 3.745 | 2.670  | 3.208 | 3.579 | 0.549 | 0.606 |
| 6.984  | 7.326 | 6.445  | 7.474 | 7.539 | 0.412 | 0.606 |

|       |       |       |       |       |       |       |
|-------|-------|-------|-------|-------|-------|-------|
| 5.931 | 6.322 | 6.488 | 6.683 | 6.878 | 0.350 | 0.606 |
| 1.863 | 2.142 | 1.799 | 3.371 | 1.838 | 0.413 | 0.606 |
| 3.907 | 4.251 | 2.590 | 4.813 | 4.899 | 0.550 | 0.606 |
| 3.426 | 2.182 | 2.523 | 2.412 | 2.319 | 0.704 | 0.606 |
| 1.796 | 1.871 | 1.383 | 1.313 | 2.126 | 0.401 | 0.606 |
| 5.157 | 3.833 | 4.650 | 4.038 | 4.032 | 0.483 | 0.606 |
| 4.905 | 4.295 | 4.977 | 2.963 | 3.840 | 0.508 | 0.606 |
| 2.666 | 3.013 | 1.646 | 3.052 | 2.978 | 0.404 | 0.606 |
| 2.844 | 3.584 | 3.164 | 2.987 | 3.276 | 0.402 | 0.606 |
| 3.175 | 3.272 | 2.922 | 3.169 | 4.303 | 0.536 | 0.606 |
| 2.531 | 3.269 | 2.225 | 3.870 | 3.644 | 0.471 | 0.606 |
| 3.620 | 3.425 | 2.219 | 3.293 | 3.055 | 0.554 | 0.606 |
| 4.455 | 5.701 | 3.912 | 5.482 | 5.110 | 0.500 | 0.606 |
| 2.346 | 2.081 | 2.102 | 2.799 | 2.994 | 0.354 | 0.606 |
| 3.173 | 3.028 | 2.400 | 2.177 | 2.765 | 0.548 | 0.606 |
| 2.346 | 2.145 | 1.725 | 2.241 | 2.221 | 0.514 | 0.606 |
| 3.346 | 4.710 | 3.569 | 3.519 | 3.465 | 0.613 | 0.606 |
| 3.022 | 4.565 | 3.693 | 3.423 | 3.642 | 0.508 | 0.606 |
| 1.944 | 1.220 | 1.813 | 1.924 | 1.732 | 0.448 | 0.606 |
| 7.722 | 7.654 | 7.479 | 8.026 | 8.109 | 0.321 | 0.606 |
| 5.872 | 4.299 | 6.795 | 3.271 | 3.688 | 0.768 | 0.606 |
| 3.322 | 5.637 | 3.146 | 6.033 | 5.894 | 0.689 | 0.606 |
| 3.149 | 3.711 | 3.551 | 3.206 | 3.766 | 0.453 | 0.606 |
| 2.501 | 2.679 | 2.294 | 2.405 | 3.065 | 0.425 | 0.606 |
| 1.916 | 1.755 | 1.269 | 1.539 | 1.664 | 0.460 | 0.606 |
| 3.162 | 2.018 | 3.301 | 2.307 | 2.049 | 0.475 | 0.606 |
| 3.124 | 2.936 | 2.665 | 2.643 | 2.672 | 0.458 | 0.606 |
| 4.526 | 4.035 | 4.302 | 2.897 | 3.428 | 0.447 | 0.606 |
| 4.167 | 3.821 | 5.025 | 3.094 | 3.425 | 0.434 | 0.606 |
| 5.280 | 5.080 | 5.672 | 4.499 | 5.124 | 0.562 | 0.606 |
| 5.483 | 6.431 | 6.554 | 5.674 | 5.922 | 0.402 | 0.606 |
| 3.728 | 3.380 | 3.573 | 3.765 | 3.410 | 0.498 | 0.606 |
| 4.599 | 4.656 | 4.400 | 4.580 | 4.737 | 0.331 | 0.606 |
| 3.663 | 3.682 | 4.168 | 3.438 | 3.019 | 0.350 | 0.606 |
| 5.822 | 5.564 | 4.605 | 5.033 | 5.247 | 0.425 | 0.606 |
| 6.273 | 5.980 | 5.922 | 6.748 | 6.535 | 0.331 | 0.606 |
| 3.396 | 4.010 | 4.053 | 3.450 | 4.052 | 0.459 | 0.606 |
| 5.298 | 5.602 | 5.316 | 6.015 | 6.003 | 0.402 | 0.606 |
| 3.839 | 4.044 | 3.411 | 3.991 | 4.246 | 0.402 | 0.606 |
| 5.520 | 6.571 | 5.762 | 6.018 | 5.902 | 0.667 | 0.606 |
| 4.553 | 4.031 | 1.206 | 4.075 | 3.521 | 0.750 | 0.606 |
| 4.940 | 5.418 | 3.075 | 5.520 | 5.479 | 0.537 | 0.606 |
| 7.412 | 6.755 | 6.843 | 5.891 | 6.562 | 0.414 | 0.606 |
| 5.200 | 5.673 | 5.424 | 5.785 | 6.075 | 0.305 | 0.606 |
| 5.662 | 6.121 | 5.242 | 6.453 | 6.266 | 0.368 | 0.606 |
| 4.646 | 5.196 | 4.976 | 4.999 | 5.289 | 0.403 | 0.606 |
| 2.368 | 2.321 | 1.926 | 2.222 | 1.991 | 0.436 | 0.606 |
| 5.845 | 6.771 | 5.678 | 6.936 | 7.448 | 0.584 | 0.606 |
| 4.926 | 6.664 | 7.382 | 3.886 | 5.807 | 0.855 | 0.606 |
| 2.207 | 1.289 | 2.326 | 1.452 | 1.674 | 0.660 | 0.606 |

|       |       |       |       |       |       |       |
|-------|-------|-------|-------|-------|-------|-------|
| 5.074 | 3.534 | 6.385 | 2.917 | 3.501 | 1.019 | 0.606 |
| 5.356 | 4.707 | 7.025 | 3.244 | 4.038 | 0.731 | 0.606 |
| 7.511 | 6.772 | 7.980 | 6.783 | 7.037 | 0.410 | 0.606 |
| 6.326 | 6.675 | 5.222 | 7.127 | 7.224 | 0.600 | 0.606 |
| 4.400 | 3.773 | 3.922 | 3.515 | 4.225 | 0.435 | 0.606 |
| 5.827 | 5.966 | 3.347 | 5.786 | 5.942 | 0.633 | 0.606 |
| 3.799 | 4.369 | 1.645 | 4.995 | 5.007 | 0.720 | 0.606 |
| 3.915 | 4.481 | 3.005 | 4.238 | 4.463 | 0.521 | 0.606 |
| 2.679 | 1.911 | 2.718 | 2.394 | 1.420 | 0.505 | 0.606 |
| 5.537 | 4.858 | 7.098 | 4.485 | 4.338 | 0.656 | 0.606 |
| 7.815 | 7.478 | 8.615 | 6.519 | 6.798 | 0.449 | 0.606 |
| 4.486 | 6.251 | 2.171 | 7.051 | 6.909 | 1.043 | 0.606 |
| 4.018 | 6.172 | 3.360 | 6.626 | 6.258 | 0.744 | 0.606 |
| 3.570 | 4.076 | 2.849 | 4.384 | 3.563 | 0.480 | 0.606 |
| 4.306 | 5.544 | 4.063 | 5.432 | 5.281 | 0.454 | 0.606 |
| 4.996 | 5.049 | 2.542 | 4.997 | 4.833 | 0.667 | 0.606 |
| 2.364 | 1.643 | 2.570 | 2.433 | 2.254 | 0.432 | 0.606 |
| 6.414 | 6.034 | 7.679 | 5.283 | 5.265 | 0.546 | 0.606 |
| 1.806 | 2.473 | 3.238 | 1.473 | 2.338 | 0.581 | 0.606 |
| 7.086 | 6.641 | 7.733 | 5.781 | 6.089 | 0.562 | 0.606 |
| 4.296 | 3.573 | 4.544 | 3.186 | 3.336 | 0.410 | 0.606 |
| 6.145 | 4.104 | 5.706 | 3.397 | 4.098 | 0.756 | 0.606 |
| 6.538 | 6.869 | 6.250 | 6.473 | 6.648 | 0.403 | 0.606 |
| 5.041 | 4.773 | 5.474 | 3.952 | 5.204 | 0.499 | 0.606 |
| 3.113 | 1.932 | 2.744 | 2.281 | 2.692 | 0.601 | 0.606 |
| 2.017 | 2.405 | 1.887 | 2.405 | 2.952 | 0.547 | 0.606 |
| 4.561 | 3.094 | 4.378 | 2.629 | 2.478 | 0.629 | 0.606 |
| 2.735 | 3.094 | 2.919 | 1.610 | 2.700 | 0.640 | 0.606 |
| 6.104 | 3.923 | 3.550 | 4.441 | 5.455 | 0.721 | 0.606 |
| 2.463 | 2.765 | 1.903 | 2.788 | 3.447 | 0.483 | 0.606 |
| 4.596 | 3.637 | 4.669 | 3.527 | 3.461 | 0.401 | 0.606 |
| 4.814 | 5.144 | 4.942 | 4.618 | 4.886 | 0.328 | 0.606 |
| 4.509 | 4.329 | 5.173 | 3.961 | 4.149 | 0.362 | 0.606 |
| 3.227 | 3.321 | 2.610 | 4.560 | 3.244 | 0.462 | 0.606 |
| 2.161 | 2.539 | 2.570 | 2.346 | 1.902 | 0.410 | 0.606 |
| 4.064 | 3.439 | 5.293 | 2.801 | 3.288 | 0.559 | 0.606 |
| 4.365 | 5.374 | 6.010 | 5.341 | 5.381 | 0.416 | 0.606 |
| 4.926 | 7.647 | 2.763 | 7.913 | 7.891 | 1.216 | 0.606 |
| 5.457 | 5.405 | 5.693 | 5.699 | 5.276 | 0.351 | 0.606 |
| 4.313 | 1.885 | 1.629 | 3.279 | 2.134 | 0.699 | 0.606 |
| 6.716 | 6.353 | 7.107 | 5.617 | 6.141 | 0.542 | 0.606 |
| 4.234 | 4.884 | 5.078 | 5.794 | 5.175 | 0.398 | 0.606 |
| 4.138 | 4.367 | 3.020 | 4.530 | 4.008 | 0.482 | 0.606 |
| 3.857 | 3.515 | 4.323 | 4.127 | 3.535 | 0.413 | 0.606 |
| 4.507 | 4.324 | 6.634 | 4.211 | 3.885 | 0.683 | 0.606 |
| 5.611 | 5.455 | 6.076 | 5.083 | 4.429 | 0.537 | 0.606 |
| 4.143 | 5.118 | 3.144 | 5.694 | 5.415 | 0.659 | 0.606 |
| 4.810 | 5.822 | 4.286 | 5.754 | 5.822 | 0.447 | 0.606 |
| 4.914 | 2.047 | 2.136 | 1.528 | 2.134 | 0.835 | 0.606 |
| 3.070 | 3.260 | 3.492 | 3.377 | 3.052 | 0.465 | 0.606 |

|       |       |       |       |       |       |       |
|-------|-------|-------|-------|-------|-------|-------|
| 4.330 | 4.791 | 4.251 | 4.657 | 5.186 | 0.368 | 0.606 |
| 4.959 | 5.014 | 4.434 | 5.315 | 5.043 | 0.372 | 0.606 |
| 7.109 | 6.829 | 7.240 | 6.553 | 7.069 | 0.326 | 0.606 |
| 5.255 | 6.679 | 4.923 | 6.873 | 6.552 | 0.528 | 0.606 |
| 5.836 | 5.022 | 6.441 | 5.447 | 4.691 | 0.421 | 0.606 |
| 4.811 | 5.768 | 4.907 | 5.777 | 5.554 | 0.422 | 0.606 |
| 8.187 | 7.599 | 8.416 | 6.845 | 6.905 | 0.458 | 0.606 |
| 2.492 | 2.495 | 1.189 | 2.878 | 3.613 | 0.691 | 0.606 |
| 6.667 | 5.617 | 7.094 | 5.045 | 5.257 | 0.506 | 0.606 |
| 3.633 | 3.523 | 4.003 | 2.923 | 3.287 | 0.403 | 0.606 |
| 6.886 | 5.667 | 6.361 | 5.242 | 5.837 | 0.481 | 0.606 |
| 2.319 | 7.056 | 2.946 | 6.993 | 6.916 | 1.180 | 0.606 |
| 5.442 | 4.852 | 6.070 | 4.854 | 4.765 | 0.409 | 0.606 |
| 2.891 | 1.654 | 2.588 | 1.802 | 1.974 | 0.499 | 0.606 |
| 3.633 | 3.205 | 4.330 | 2.605 | 2.843 | 0.425 | 0.606 |
| 7.460 | 7.776 | 8.147 | 6.016 | 7.058 | 0.583 | 0.606 |
| 4.763 | 4.457 | 5.414 | 2.993 | 3.795 | 0.596 | 0.606 |
| 4.154 | 4.097 | 4.831 | 2.872 | 3.073 | 0.545 | 0.606 |
| 3.005 | 6.486 | 2.615 | 2.920 | 3.107 | 0.887 | 0.606 |
| 2.903 | 3.003 | 3.069 | 1.732 | 2.276 | 0.613 | 0.606 |
| 5.474 | 6.591 | 4.160 | 6.919 | 6.822 | 0.625 | 0.606 |
| 6.383 | 6.463 | 4.898 | 7.135 | 6.884 | 0.620 | 0.606 |
| 4.068 | 4.152 | 4.094 | 3.796 | 3.823 | 0.512 | 0.606 |
| 3.611 | 4.628 | 4.238 | 4.919 | 5.183 | 0.565 | 0.606 |
| 3.437 | 3.640 | 4.171 | 3.298 | 3.429 | 0.411 | 0.606 |
| 3.125 | 3.927 | 2.640 | 3.796 | 4.003 | 0.400 | 0.606 |
| 5.527 | 5.892 | 5.152 | 6.402 | 6.022 | 0.429 | 0.606 |
| 4.426 | 5.117 | 4.791 | 4.591 | 3.849 | 0.465 | 0.606 |
| 5.521 | 5.811 | 5.470 | 6.259 | 5.986 | 0.319 | 0.606 |
| 6.206 | 7.663 | 5.586 | 8.038 | 8.048 | 0.659 | 0.606 |
| 4.906 | 5.244 | 4.691 | 5.495 | 5.143 | 0.342 | 0.606 |
| 2.006 | 2.079 | 1.303 | 1.986 | 2.068 | 0.461 | 0.606 |
| 4.128 | 3.746 | 3.547 | 3.635 | 3.553 | 0.614 | 0.606 |
| 4.952 | 5.304 | 5.433 | 5.741 | 5.756 | 0.352 | 0.606 |
| 2.475 | 2.353 | 1.782 | 2.984 | 3.392 | 0.592 | 0.606 |
| 3.967 | 3.578 | 4.025 | 3.717 | 3.411 | 0.421 | 0.606 |
| 2.550 | 1.854 | 2.575 | 2.375 | 2.664 | 0.464 | 0.606 |
| 3.920 | 3.351 | 2.842 | 3.375 | 3.680 | 0.505 | 0.606 |
| 3.410 | 3.108 | 3.483 | 3.416 | 3.272 | 0.339 | 0.606 |
| 2.852 | 2.006 | 2.599 | 1.893 | 1.472 | 0.556 | 0.606 |
| 2.853 | 1.556 | 2.508 | 1.964 | 1.496 | 0.499 | 0.606 |
| 7.873 | 6.710 | 7.627 | 6.861 | 6.733 | 0.387 | 0.606 |
| 2.542 | 1.900 | 3.685 | 2.492 | 2.201 | 0.411 | 0.606 |
| 0.933 | 2.765 | 0.781 | 4.122 | 3.362 | 0.730 | 0.606 |
| 5.392 | 6.324 | 6.268 | 4.429 | 5.466 | 0.649 | 0.606 |
| 1.925 | 1.733 | 1.224 | 3.442 | 2.860 | 0.586 | 0.606 |
| 4.160 | 2.629 | 2.910 | 2.568 | 3.097 | 0.380 | 0.606 |
| 3.176 | 2.983 | 2.138 | 2.319 | 3.209 | 0.496 | 0.606 |
| 3.014 | 4.564 | 2.713 | 4.256 | 3.668 | 0.528 | 0.606 |
| 1.907 | 1.973 | 1.509 | 2.221 | 2.306 | 0.399 | 0.606 |



|       |       |       |       |       |       |       |
|-------|-------|-------|-------|-------|-------|-------|
| 3.439 | 3.189 | 3.632 | 2.152 | 3.066 | 0.496 | 0.606 |
| 3.254 | 3.381 | 3.322 | 3.356 | 3.496 | 0.448 | 0.606 |
| 1.998 | 3.217 | 1.933 | 3.870 | 3.104 | 0.508 | 0.606 |
| 2.393 | 2.818 | 2.260 | 3.190 | 3.911 | 0.573 | 0.606 |
| 3.510 | 2.426 | 3.845 | 2.841 | 2.797 | 0.590 | 0.606 |
| 2.098 | 3.721 | 2.334 | 3.816 | 3.889 | 0.481 | 0.606 |
| 1.145 | 3.019 | 1.402 | 3.097 | 3.295 | 0.542 | 0.606 |
| 2.730 | 2.536 | 3.106 | 2.386 | 3.113 | 0.526 | 0.606 |
| 0.920 | 2.497 | 0.790 | 3.318 | 3.603 | 0.742 | 0.606 |
| 1.433 | 2.138 | 1.457 | 3.117 | 3.221 | 0.518 | 0.606 |
| 1.876 | 2.416 | 2.075 | 1.603 | 2.445 | 0.435 | 0.606 |
| 4.030 | 4.870 | 3.629 | 4.777 | 4.990 | 0.462 | 0.606 |
| 3.497 | 2.888 | 4.705 | 2.898 | 3.115 | 0.565 | 0.606 |
| 3.073 | 4.460 | 2.538 | 4.973 | 4.968 | 0.667 | 0.606 |
| 4.128 | 3.360 | 3.445 | 3.325 | 2.743 | 0.624 | 0.606 |
| 2.218 | 3.415 | 1.973 | 2.571 | 2.141 | 0.520 | 0.606 |
| 3.282 | 3.575 | 3.497 | 3.164 | 3.332 | 0.606 | 0.606 |
| 3.339 | 2.957 | 2.673 | 3.494 | 2.963 | 0.560 | 0.606 |
| 4.798 | 2.638 | 4.771 | 3.502 | 3.034 | 0.580 | 0.606 |
| 2.889 | 2.662 | 3.046 | 3.289 | 2.667 | 0.486 | 0.606 |
| 2.744 | 1.930 | 5.515 | 1.185 | 1.561 | 0.940 | 0.606 |
| 2.555 | 2.949 | 2.634 | 3.427 | 3.200 | 0.454 | 0.606 |
| 3.720 | 4.560 | 4.230 | 4.035 | 4.514 | 0.361 | 0.606 |
| 2.879 | 2.423 | 2.888 | 2.248 | 2.938 | 0.495 | 0.606 |
| 2.930 | 2.430 | 2.797 | 1.734 | 2.262 | 0.469 | 0.606 |
| 2.896 | 2.235 | 2.110 | 2.270 | 1.900 | 0.439 | 0.606 |
| 3.769 | 3.590 | 3.496 | 3.882 | 3.424 | 0.442 | 0.606 |
| 3.607 | 3.750 | 2.909 | 5.188 | 4.775 | 0.539 | 0.606 |
| 1.112 | 1.773 | 1.252 | 1.838 | 1.267 | 0.482 | 0.606 |
| 4.209 | 5.343 | 2.636 | 5.597 | 5.483 | 0.743 | 0.606 |
| 1.728 | 2.287 | 2.551 | 2.354 | 2.564 | 0.375 | 0.606 |
| 5.189 | 5.770 | 4.582 | 5.418 | 5.607 | 0.392 | 0.606 |
| 3.834 | 2.276 | 3.602 | 2.230 | 2.391 | 0.463 | 0.606 |
| 3.125 | 3.860 | 3.271 | 2.941 | 3.918 | 0.410 | 0.606 |
| 2.689 | 3.246 | 3.125 | 3.628 | 4.042 | 0.443 | 0.606 |
| 2.351 | 3.105 | 2.333 | 4.250 | 3.618 | 0.531 | 0.606 |
| 2.269 | 2.545 | 3.819 | 2.361 | 1.900 | 0.574 | 0.606 |
| 4.543 | 3.608 | 4.545 | 3.321 | 4.168 | 0.485 | 0.606 |
| 3.089 | 3.098 | 2.636 | 3.666 | 3.510 | 0.391 | 0.606 |
| 2.237 | 2.357 | 1.960 | 2.128 | 2.496 | 0.394 | 0.606 |
| 2.279 | 2.128 | 3.339 | 2.598 | 2.271 | 0.420 | 0.606 |
| 4.090 | 4.104 | 4.961 | 2.802 | 3.169 | 0.482 | 0.606 |
| 2.690 | 2.219 | 1.907 | 2.376 | 3.377 | 0.400 | 0.606 |
| 4.190 | 4.137 | 4.424 | 4.940 | 4.939 | 0.506 | 0.606 |
| 2.444 | 3.030 | 2.453 | 3.714 | 3.209 | 0.450 | 0.606 |
| 2.887 | 2.827 | 2.480 | 2.572 | 3.017 | 0.455 | 0.606 |
| 3.605 | 3.520 | 4.044 | 2.667 | 3.145 | 0.376 | 0.606 |
| 4.531 | 4.286 | 3.297 | 3.853 | 4.393 | 0.445 | 0.606 |
| 6.579 | 4.763 | 4.648 | 5.129 | 5.173 | 0.641 | 0.606 |
| 4.209 | 4.898 | 4.300 | 4.278 | 4.942 | 0.386 | 0.606 |

|       |       |       |       |       |       |       |
|-------|-------|-------|-------|-------|-------|-------|
| 6.950 | 7.217 | 6.007 | 7.153 | 7.146 | 0.409 | 0.606 |
| 6.312 | 6.372 | 7.229 | 5.645 | 5.849 | 0.376 | 0.606 |
| 2.717 | 3.941 | 2.645 | 4.130 | 3.858 | 0.441 | 0.606 |
| 7.578 | 5.806 | 8.172 | 4.124 | 4.834 | 0.867 | 0.606 |
| 4.246 | 4.454 | 3.881 | 5.200 | 4.695 | 0.552 | 0.606 |
| 4.479 | 4.086 | 4.801 | 3.208 | 3.529 | 0.397 | 0.606 |
| 5.557 | 5.139 | 6.077 | 4.928 | 5.123 | 0.421 | 0.606 |
| 4.491 | 5.033 | 5.206 | 3.731 | 5.018 | 0.654 | 0.606 |
| 3.727 | 3.448 | 4.363 | 3.523 | 3.677 | 0.452 | 0.606 |
| 3.239 | 3.789 | 2.861 | 4.172 | 4.065 | 0.447 | 0.606 |
| 3.980 | 3.392 | 4.047 | 3.403 | 3.485 | 0.386 | 0.606 |
| 5.770 | 5.743 | 5.459 | 4.571 | 6.203 | 0.459 | 0.606 |
| 5.598 | 6.029 | 6.211 | 4.088 | 5.788 | 0.593 | 0.606 |
| 2.895 | 2.065 | 3.044 | 2.142 | 1.986 | 0.464 | 0.606 |
| 2.670 | 1.999 | 2.336 | 1.516 | 2.427 | 0.492 | 0.606 |
| 6.052 | 5.647 | 5.584 | 4.563 | 5.655 | 0.442 | 0.606 |
| 5.054 | 7.068 | 3.815 | 7.052 | 6.337 | 0.736 | 0.606 |
| 3.934 | 3.650 | 1.207 | 4.726 | 4.179 | 0.717 | 0.606 |
| 2.325 | 4.970 | 1.564 | 5.906 | 5.773 | 0.979 | 0.606 |
| 4.740 | 3.530 | 3.780 | 2.746 | 3.306 | 0.526 | 0.606 |
| 5.818 | 4.778 | 5.227 | 3.991 | 4.669 | 0.503 | 0.606 |
| 7.296 | 7.665 | 7.282 | 7.928 | 7.710 | 0.350 | 0.606 |
| 2.850 | 4.778 | 1.881 | 5.714 | 5.008 | 0.794 | 0.606 |
| 5.807 | 6.166 | 6.260 | 6.661 | 6.634 | 0.329 | 0.606 |
| 5.191 | 5.194 | 5.678 | 5.601 | 5.746 | 0.435 | 0.606 |
| 6.586 | 7.596 | 4.919 | 7.738 | 7.369 | 0.598 | 0.606 |
| 4.954 | 4.019 | 4.486 | 2.586 | 5.111 | 0.927 | 0.606 |
| 2.378 | 4.170 | 2.609 | 1.633 | 1.591 | 0.907 | 0.606 |
| 2.277 | 3.188 | 1.929 | 1.482 | 3.318 | 0.612 | 0.606 |
| 3.141 | 2.861 | 3.180 | 3.152 | 3.326 | 0.457 | 0.606 |
| 6.326 | 9.132 | 3.984 | 9.228 | 9.470 | 1.191 | 0.606 |
| 5.910 | 5.857 | 6.040 | 4.300 | 5.451 | 0.566 | 0.606 |
| 2.535 | 3.655 | 2.975 | 2.465 | 1.896 | 0.617 | 0.606 |
| 4.118 | 4.194 | 3.858 | 3.593 | 4.049 | 0.471 | 0.606 |
| 1.069 | 2.454 | 0.984 | 1.084 | 1.295 | 0.647 | 0.606 |
| 2.323 | 2.887 | 2.103 | 2.180 | 2.580 | 0.680 | 0.606 |
| 6.235 | 6.961 | 6.957 | 5.544 | 5.725 | 0.635 | 0.606 |
| 2.134 | 2.139 | 2.478 | 1.357 | 1.714 | 0.545 | 0.606 |
| 4.071 | 3.587 | 2.940 | 3.070 | 3.140 | 0.574 | 0.606 |
| 3.373 | 1.186 | 4.229 | 2.226 | 2.968 | 0.893 | 0.606 |
| 2.848 | 1.874 | 1.998 | 2.024 | 2.146 | 0.498 | 0.606 |
| 5.440 | 4.658 | 5.291 | 5.429 | 4.985 | 0.492 | 0.606 |
| 4.341 | 4.241 | 2.347 | 4.908 | 4.754 | 0.545 | 0.606 |
| 2.771 | 2.039 | 2.252 | 2.021 | 1.849 | 0.367 | 0.606 |
| 2.623 | 3.057 | 2.102 | 2.840 | 3.377 | 0.456 | 0.606 |
| 6.879 | 7.114 | 8.228 | 6.473 | 6.936 | 0.409 | 0.606 |
| 3.982 | 3.255 | 4.137 | 2.845 | 3.494 | 0.454 | 0.606 |
| 6.927 | 6.550 | 6.749 | 5.840 | 6.448 | 0.355 | 0.606 |
| 4.018 | 4.901 | 4.681 | 3.534 | 4.005 | 0.595 | 0.606 |
| 7.160 | 7.323 | 7.725 | 5.048 | 6.384 | 0.882 | 0.606 |

|       |       |       |       |       |       |       |
|-------|-------|-------|-------|-------|-------|-------|
| 7.181 | 6.684 | 8.175 | 7.091 | 7.748 | 0.464 | 0.606 |
| 7.213 | 8.041 | 6.652 | 8.283 | 8.311 | 0.437 | 0.606 |
| 5.802 | 5.779 | 3.366 | 5.853 | 5.804 | 0.593 | 0.606 |
| 3.590 | 5.299 | 3.717 | 5.015 | 5.771 | 0.726 | 0.606 |
| 4.729 | 4.615 | 6.001 | 4.808 | 4.764 | 0.436 | 0.606 |
| 4.353 | 3.659 | 3.280 | 3.724 | 3.006 | 0.396 | 0.606 |
| 1.602 | 3.263 | 2.112 | 3.250 | 2.200 | 0.493 | 0.606 |
| 7.520 | 6.605 | 8.077 | 5.306 | 5.518 | 0.634 | 0.606 |
| 2.008 | 4.128 | 3.256 | 3.429 | 4.102 | 0.721 | 0.606 |
| 2.895 | 2.601 | 2.321 | 3.335 | 1.946 | 0.573 | 0.606 |
| 3.677 | 3.455 | 2.539 | 3.867 | 3.370 | 0.389 | 0.606 |
| 4.986 | 3.964 | 5.684 | 3.584 | 3.751 | 0.496 | 0.606 |
| 4.128 | 3.210 | 3.831 | 3.129 | 3.406 | 0.442 | 0.606 |
| 5.446 | 6.733 | 4.529 | 6.845 | 6.412 | 0.529 | 0.606 |
| 4.937 | 4.675 | 3.837 | 3.743 | 4.723 | 0.526 | 0.606 |
| 3.709 | 2.675 | 2.423 | 4.123 | 3.665 | 0.826 | 0.606 |
| 2.604 | 2.238 | 3.149 | 1.281 | 0.843 | 0.885 | 0.606 |
| 5.121 | 5.885 | 2.706 | 6.142 | 6.419 | 0.873 | 0.606 |
| 6.212 | 5.417 | 8.176 | 4.911 | 5.527 | 0.690 | 0.606 |
| 5.775 | 4.309 | 4.324 | 4.494 | 3.901 | 0.623 | 0.606 |
| 3.017 | 2.837 | 1.472 | 3.614 | 2.629 | 0.500 | 0.606 |
| 5.981 | 5.457 | 6.628 | 4.863 | 5.146 | 0.423 | 0.606 |
| 2.632 | 3.297 | 2.439 | 3.541 | 3.665 | 0.359 | 0.606 |
| 3.691 | 4.201 | 3.672 | 2.539 | 3.659 | 0.569 | 0.606 |
| 1.982 | 1.996 | 2.112 | 1.940 | 1.999 | 0.529 | 0.606 |
| 5.064 | 4.184 | 5.772 | 2.635 | 3.657 | 0.685 | 0.606 |
| 3.716 | 3.565 | 3.881 | 3.393 | 4.543 | 0.501 | 0.606 |
| 3.155 | 3.577 | 3.475 | 3.573 | 3.099 | 0.401 | 0.606 |
| 8.169 | 6.457 | 8.826 | 5.741 | 5.969 | 0.746 | 0.606 |
| 4.759 | 4.550 | 3.886 | 5.928 | 5.421 | 0.529 | 0.606 |
| 4.000 | 3.462 | 3.520 | 3.492 | 4.259 | 0.442 | 0.606 |
| 5.065 | 4.228 | 3.450 | 4.959 | 4.437 | 0.491 | 0.606 |
| 1.838 | 2.276 | 1.259 | 3.190 | 3.077 | 0.464 | 0.606 |
| 3.103 | 3.581 | 3.506 | 3.189 | 4.229 | 0.413 | 0.606 |
| 5.506 | 6.594 | 4.241 | 7.019 | 6.453 | 0.585 | 0.606 |
| 5.753 | 7.141 | 6.585 | 7.178 | 6.984 | 0.465 | 0.606 |
| 6.569 | 2.359 | 4.710 | 2.788 | 1.322 | 1.306 | 0.606 |
| 6.552 | 7.564 | 5.848 | 8.092 | 7.785 | 0.545 | 0.606 |
| 4.189 | 3.192 | 4.686 | 3.390 | 3.215 | 0.438 | 0.606 |
| 2.185 | 2.325 | 1.976 | 1.197 | 2.010 | 0.448 | 0.606 |
| 2.507 | 2.288 | 1.626 | 2.808 | 2.176 | 0.643 | 0.606 |
| 4.195 | 3.791 | 3.925 | 3.331 | 3.461 | 0.416 | 0.606 |
| 4.813 | 3.064 | 2.493 | 3.503 | 2.949 | 0.527 | 0.606 |
| 5.055 | 4.852 | 5.015 | 4.423 | 4.493 | 0.350 | 0.606 |
| 5.361 | 5.387 | 3.989 | 5.806 | 5.411 | 0.447 | 0.606 |
| 6.103 | 6.696 | 5.690 | 6.586 | 6.189 | 0.416 | 0.606 |
| 5.065 | 3.642 | 3.704 | 3.279 | 4.051 | 0.474 | 0.606 |
| 2.732 | 2.731 | 2.380 | 1.878 | 2.713 | 0.422 | 0.606 |
| 2.418 | 1.853 | 3.748 | 1.907 | 2.595 | 0.539 | 0.606 |
| 5.329 | 6.338 | 4.687 | 6.734 | 6.813 | 0.497 | 0.606 |

|       |       |       |       |       |       |       |
|-------|-------|-------|-------|-------|-------|-------|
| 6.079 | 6.149 | 4.717 | 6.517 | 6.484 | 0.546 | 0.606 |
| 3.267 | 2.343 | 2.512 | 2.700 | 2.605 | 0.433 | 0.606 |
| 3.086 | 2.796 | 1.727 | 2.527 | 3.493 | 0.509 | 0.606 |
| 3.772 | 3.879 | 3.783 | 4.216 | 4.114 | 0.476 | 0.606 |
| 5.005 | 5.221 | 5.231 | 5.799 | 5.832 | 0.357 | 0.606 |
| 2.249 | 2.542 | 2.013 | 2.444 | 3.111 | 0.417 | 0.606 |
| 5.422 | 6.082 | 5.501 | 6.082 | 5.829 | 0.375 | 0.606 |
| 2.550 | 3.186 | 3.222 | 3.307 | 3.967 | 0.425 | 0.606 |
| 3.992 | 4.672 | 5.024 | 3.966 | 4.765 | 0.428 | 0.606 |
| 4.319 | 4.581 | 5.218 | 4.971 | 4.724 | 0.370 | 0.606 |
| 2.858 | 3.754 | 2.293 | 3.840 | 3.166 | 0.474 | 0.606 |
| 3.351 | 4.284 | 3.785 | 4.488 | 4.665 | 0.406 | 0.606 |
| 4.774 | 4.714 | 4.730 | 4.022 | 4.429 | 0.371 | 0.606 |
| 4.775 | 4.706 | 4.859 | 4.008 | 4.447 | 0.367 | 0.606 |
| 3.895 | 3.449 | 4.494 | 3.005 | 3.101 | 0.476 | 0.606 |
| 7.314 | 7.710 | 7.362 | 7.334 | 5.655 | 0.657 | 0.606 |
| 1.237 | 7.181 | 2.359 | 7.347 | 6.758 | 1.341 | 0.606 |
| 3.766 | 2.656 | 4.269 | 2.874 | 3.191 | 0.603 | 0.606 |
| 7.231 | 6.994 | 7.601 | 5.846 | 5.927 | 0.464 | 0.606 |
| 7.103 | 6.876 | 7.491 | 5.730 | 5.826 | 0.462 | 0.606 |
| 6.972 | 6.798 | 7.504 | 5.662 | 5.790 | 0.468 | 0.606 |
| 4.835 | 4.639 | 5.430 | 3.762 | 3.874 | 0.452 | 0.606 |
| 5.910 | 5.525 | 5.494 | 4.919 | 5.486 | 0.489 | 0.606 |
| 7.532 | 7.849 | 7.399 | 8.134 | 8.058 | 0.307 | 0.606 |
| 4.669 | 5.428 | 5.056 | 5.460 | 5.418 | 0.338 | 0.606 |
| 2.178 | 2.101 | 2.620 | 2.040 | 2.394 | 0.485 | 0.606 |
| 2.462 | 2.793 | 4.158 | 2.561 | 2.243 | 0.627 | 0.606 |
| 3.010 | 2.782 | 3.021 | 2.618 | 2.508 | 0.424 | 0.606 |
| 1.878 | 2.968 | 3.001 | 2.550 | 2.406 | 0.489 | 0.606 |
| 3.385 | 3.985 | 4.207 | 2.287 | 4.106 | 0.521 | 0.606 |
| 2.670 | 3.298 | 2.567 | 3.868 | 3.655 | 0.390 | 0.606 |
| 4.928 | 5.477 | 3.348 | 5.686 | 5.697 | 0.569 | 0.606 |
| 5.253 | 4.881 | 5.241 | 4.913 | 4.278 | 0.367 | 0.606 |
| 5.601 | 5.338 | 5.821 | 5.942 | 5.349 | 1.779 | 0.606 |
| 4.477 | 4.686 | 4.361 | 4.272 | 4.492 | 0.470 | 0.606 |
| 4.067 | 3.562 | 3.616 | 3.139 | 3.646 | 0.498 | 0.606 |
| 3.355 | 3.084 | 3.718 | 2.920 | 3.369 | 0.370 | 0.606 |
| 5.012 | 5.646 | 5.117 | 5.831 | 5.657 | 0.504 | 0.606 |
| 3.248 | 3.544 | 4.168 | 2.696 | 2.002 | 0.626 | 0.606 |
| 1.705 | 3.322 | 4.768 | 1.984 | 4.129 | 0.900 | 0.606 |
| 1.690 | 3.313 | 4.759 | 2.088 | 4.139 | 0.910 | 0.606 |
| 4.703 | 4.317 | 3.686 | 4.844 | 4.719 | 0.383 | 0.606 |
| 2.348 | 3.286 | 3.468 | 2.177 | 2.932 | 0.527 | 0.606 |
| 4.962 | 4.626 | 4.686 | 3.627 | 3.946 | 0.458 | 0.606 |
| 2.653 | 2.804 | 2.660 | 2.385 | 2.667 | 0.413 | 0.606 |
| 5.239 | 5.284 | 5.447 | 4.580 | 4.638 | 0.493 | 0.606 |
| 8.432 | 7.784 | 8.952 | 7.317 | 7.575 | 0.386 | 0.606 |
| 7.075 | 7.330 | 6.187 | 7.495 | 7.576 | 0.406 | 0.606 |
| 5.284 | 5.362 | 3.942 | 5.680 | 5.750 | 0.433 | 0.606 |

|        |       |        |       |       |       |       |
|--------|-------|--------|-------|-------|-------|-------|
| 5.845  | 5.476 | 4.930  | 6.233 | 6.101 | 0.384 | 0.606 |
| 2.723  | 2.483 | 5.020  | 2.809 | 2.162 | 0.572 | 0.606 |
| 5.747  | 5.151 | 6.632  | 5.242 | 5.568 | 0.379 | 0.606 |
| 2.133  | 3.623 | 1.681  | 2.169 | 2.209 | 0.845 | 0.606 |
| 3.917  | 3.386 | 4.395  | 4.186 | 3.568 | 0.369 | 0.606 |
| 4.974  | 5.161 | 4.931  | 5.453 | 5.199 | 0.404 | 0.606 |
| 5.833  | 5.533 | 7.229  | 4.423 | 4.628 | 0.546 | 0.606 |
| 2.478  | 3.683 | 2.324  | 3.283 | 3.302 | 0.378 | 0.606 |
| 2.021  | 3.225 | 1.168  | 4.461 | 3.617 | 0.675 | 0.606 |
| 1.025  | 1.868 | 1.388  | 1.382 | 1.438 | 0.480 | 0.606 |
| 4.563  | 5.448 | 5.143  | 5.246 | 5.145 | 0.424 | 0.606 |
| 3.051  | 4.899 | 2.104  | 5.563 | 5.217 | 0.911 | 0.606 |
| 3.651  | 4.946 | 4.416  | 5.345 | 5.099 | 0.471 | 0.606 |
| 5.180  | 6.953 | 4.628  | 7.444 | 7.469 | 0.721 | 0.606 |
| 5.988  | 6.580 | 5.154  | 6.730 | 6.975 | 0.435 | 0.606 |
| 6.576  | 6.394 | 5.983  | 6.823 | 6.437 | 0.330 | 0.606 |
| 4.942  | 5.453 | 3.965  | 6.055 | 5.892 | 0.536 | 0.606 |
| 5.511  | 6.476 | 5.076  | 6.782 | 6.746 | 0.602 | 0.606 |
| 4.824  | 2.631 | 2.462  | 2.843 | 2.489 | 0.616 | 0.606 |
| 4.886  | 6.578 | 4.540  | 6.987 | 6.611 | 0.566 | 0.606 |
| 10.323 | 9.248 | 10.409 | 8.944 | 8.793 | 0.482 | 0.606 |
| 7.248  | 6.832 | 7.367  | 5.804 | 5.633 | 0.506 | 0.606 |
| 1.640  | 2.163 | 1.912  | 2.316 | 2.421 | 0.466 | 0.606 |
| 4.773  | 5.432 | 3.298  | 5.098 | 5.615 | 0.493 | 0.606 |
| 5.062  | 6.209 | 6.118  | 5.297 | 5.614 | 0.520 | 0.606 |
| 2.521  | 3.702 | 2.479  | 2.538 | 2.672 | 0.479 | 0.606 |
| 4.992  | 5.356 | 5.290  | 6.457 | 6.056 | 0.434 | 0.606 |
| 4.934  | 4.631 | 4.753  | 5.358 | 5.589 | 0.395 | 0.606 |
| 5.590  | 5.539 | 4.611  | 6.478 | 5.764 | 0.418 | 0.606 |
| 5.322  | 5.550 | 5.137  | 5.700 | 5.697 | 0.366 | 0.606 |
| 1.952  | 2.378 | 1.442  | 3.006 | 1.771 | 0.432 | 0.606 |
| 5.900  | 5.397 | 6.587  | 5.040 | 4.989 | 0.421 | 0.606 |
| 2.913  | 1.113 | 3.089  | 1.886 | 2.786 | 0.583 | 0.606 |
| 8.811  | 8.329 | 9.515  | 7.678 | 7.983 | 0.416 | 0.606 |
| 5.379  | 7.120 | 4.001  | 7.078 | 7.260 | 0.731 | 0.606 |
| 5.696  | 8.027 | 4.152  | 8.229 | 8.090 | 0.851 | 0.606 |
| 5.960  | 3.533 | 2.415  | 3.055 | 3.342 | 0.689 | 0.606 |
| 4.940  | 5.426 | 3.161  | 5.530 | 4.995 | 0.511 | 0.606 |
| 4.015  | 4.540 | 4.584  | 4.243 | 4.466 | 0.440 | 0.606 |
| 3.490  | 3.232 | 4.675  | 3.609 | 2.659 | 0.518 | 0.606 |
| 3.781  | 1.828 | 1.266  | 1.281 | 1.700 | 0.869 | 0.606 |
| 2.106  | 2.527 | 3.785  | 2.284 | 2.364 | 0.522 | 0.606 |
| 5.581  | 5.472 | 5.898  | 6.054 | 6.200 | 0.458 | 0.606 |
| 4.192  | 3.891 | 4.951  | 2.787 | 2.346 | 0.861 | 0.606 |
| 3.835  | 4.372 | 2.901  | 5.068 | 4.830 | 0.476 | 0.606 |
| 7.128  | 7.012 | 6.197  | 7.186 | 7.257 | 0.336 | 0.606 |
| 6.325  | 6.519 | 6.184  | 6.882 | 7.163 | 0.327 | 0.606 |
| 2.840  | 2.067 | 2.202  | 2.176 | 2.204 | 0.498 | 0.606 |
| 2.680  | 2.397 | 4.291  | 1.833 | 2.358 | 0.513 | 0.606 |
| 2.730  | 2.773 | 2.729  | 2.616 | 2.496 | 0.599 | 0.606 |

|       |       |       |       |       |       |       |
|-------|-------|-------|-------|-------|-------|-------|
| 3.372 | 3.398 | 2.478 | 3.973 | 3.794 | 0.500 | 0.606 |
| 6.925 | 7.043 | 6.874 | 7.564 | 7.389 | 0.404 | 0.606 |
| 5.518 | 6.584 | 3.883 | 6.764 | 6.644 | 0.661 | 0.606 |
| 6.400 | 7.499 | 4.540 | 7.771 | 7.368 | 0.681 | 0.606 |
| 6.360 | 6.328 | 7.038 | 5.850 | 5.726 | 0.357 | 0.606 |
| 3.652 | 6.026 | 3.445 | 6.641 | 6.571 | 0.749 | 0.606 |
| 4.170 | 4.308 | 4.855 | 3.807 | 4.028 | 0.431 | 0.606 |
| 2.379 | 2.429 | 3.337 | 2.744 | 2.744 | 0.518 | 0.606 |
| 1.240 | 2.274 | 1.145 | 3.183 | 3.002 | 0.592 | 0.606 |
| 1.850 | 1.947 | 2.428 | 1.677 | 1.467 | 0.430 | 0.606 |
| 3.576 | 5.179 | 1.973 | 5.420 | 5.501 | 0.840 | 0.606 |
| 3.008 | 5.498 | 1.614 | 5.775 | 5.780 | 0.889 | 0.606 |
| 6.433 | 7.232 | 5.856 | 7.650 | 7.407 | 0.469 | 0.606 |
| 4.891 | 4.907 | 6.673 | 4.795 | 4.486 | 0.500 | 0.606 |
| 4.582 | 4.790 | 3.831 | 4.634 | 3.747 | 0.475 | 0.606 |
| 2.026 | 4.546 | 2.180 | 4.604 | 4.900 | 0.766 | 0.606 |
| 2.187 | 2.582 | 1.640 | 2.110 | 2.956 | 0.410 | 0.606 |
| 2.294 | 3.829 | 2.398 | 4.126 | 3.964 | 0.515 | 0.606 |
| 2.120 | 3.392 | 2.451 | 3.371 | 2.824 | 0.437 | 0.606 |
| 1.025 | 1.602 | 1.805 | 2.827 | 2.937 | 0.456 | 0.606 |
| 3.227 | 1.844 | 2.810 | 1.681 | 1.487 | 0.726 | 0.606 |
| 6.160 | 6.593 | 6.719 | 6.929 | 6.840 | 0.325 | 0.606 |
| 2.440 | 2.629 | 1.896 | 3.054 | 3.372 | 0.428 | 0.606 |
| 2.641 | 2.691 | 4.493 | 2.329 | 2.008 | 0.502 | 0.606 |
| 3.499 | 4.107 | 2.724 | 4.126 | 3.612 | 0.346 | 0.606 |
| 2.827 | 3.382 | 2.120 | 3.137 | 3.029 | 0.353 | 0.606 |
| 7.290 | 8.448 | 4.973 | 8.530 | 8.496 | 0.734 | 0.606 |
| 7.933 | 7.696 | 6.304 | 8.161 | 8.241 | 0.435 | 0.606 |
| 4.045 | 3.482 | 5.094 | 3.912 | 3.534 | 0.429 | 0.606 |
| 4.903 | 3.259 | 2.518 | 3.839 | 4.288 | 0.927 | 0.606 |
| 3.866 | 2.960 | 3.028 | 2.885 | 2.264 | 0.478 | 0.606 |
| 4.917 | 5.144 | 3.623 | 5.637 | 5.522 | 0.487 | 0.606 |
| 3.282 | 1.702 | 1.576 | 1.897 | 1.878 | 0.904 | 0.606 |
| 2.557 | 2.398 | 2.828 | 1.856 | 1.829 | 0.380 | 0.606 |
| 3.021 | 2.088 | 2.031 | 1.460 | 0.838 | 0.606 | 0.606 |
| 3.026 | 1.977 | 1.761 | 2.515 | 2.285 | 0.571 | 0.606 |
| 3.392 | 2.253 | 2.454 | 2.637 | 2.544 | 0.454 | 0.606 |
| 3.562 | 3.639 | 2.410 | 4.200 | 3.715 | 0.548 | 0.606 |
| 4.298 | 4.823 | 3.285 | 5.059 | 5.110 | 0.567 | 0.606 |
| 4.376 | 2.944 | 2.842 | 3.084 | 3.021 | 0.673 | 0.606 |
| 2.911 | 2.265 | 2.289 | 2.572 | 2.776 | 0.505 | 0.606 |
| 8.294 | 8.856 | 9.191 | 8.967 | 8.687 | 0.437 | 0.606 |
| 7.624 | 7.868 | 7.115 | 8.089 | 8.027 | 0.315 | 0.606 |
| 6.351 | 5.678 | 6.615 | 6.073 | 5.970 | 0.457 | 0.606 |
| 6.938 | 7.194 | 8.462 | 8.059 | 7.389 | 0.649 | 0.606 |
| 5.418 | 5.244 | 5.164 | 5.713 | 5.908 | 0.364 | 0.606 |
| 5.332 | 5.011 | 6.403 | 5.052 | 4.644 | 0.385 | 0.606 |
| 6.498 | 6.617 | 5.855 | 6.763 | 6.628 | 0.379 | 0.606 |
| 5.058 | 5.094 | 5.613 | 5.272 | 5.628 | 0.320 | 0.606 |
| 5.489 | 5.440 | 5.566 | 5.702 | 5.494 | 0.356 | 0.606 |

|       |        |       |        |        |       |       |
|-------|--------|-------|--------|--------|-------|-------|
| 4.101 | 4.167  | 3.697 | 4.211  | 4.468  | 0.368 | 0.606 |
| 9.715 | 9.784  | 9.441 | 9.727  | 9.738  | 0.327 | 0.606 |
| 3.485 | 4.091  | 2.984 | 4.007  | 4.445  | 0.402 | 0.606 |
| 2.911 | 2.659  | 3.072 | 1.978  | 2.660  | 0.437 | 0.606 |
| 3.759 | 2.687  | 3.866 | 3.519  | 3.421  | 0.442 | 0.606 |
| 3.262 | 2.738  | 3.616 | 2.821  | 2.659  | 0.418 | 0.606 |
| 2.378 | 1.854  | 2.654 | 1.929  | 1.510  | 0.737 | 0.606 |
| 2.657 | 3.311  | 3.527 | 3.294  | 2.294  | 0.424 | 0.606 |
| 8.939 | 8.585  | 8.981 | 7.928  | 7.973  | 0.391 | 0.606 |
| 9.279 | 10.226 | 4.907 | 10.150 | 10.163 | 1.165 | 0.606 |
| 6.064 | 6.278  | 5.411 | 6.537  | 6.607  | 0.403 | 0.606 |
| 3.879 | 4.383  | 3.429 | 4.813  | 4.701  | 0.466 | 0.606 |
| 2.534 | 3.617  | 3.029 | 4.267  | 3.272  | 0.553 | 0.606 |
| 3.023 | 3.546  | 3.023 | 2.983  | 2.513  | 0.548 | 0.606 |
| 5.534 | 4.773  | 6.183 | 4.524  | 4.675  | 0.438 | 0.606 |
| 8.905 | 8.378  | 8.240 | 8.598  | 8.353  | 0.348 | 0.606 |
| 3.676 | 2.784  | 4.231 | 2.849  | 2.690  | 0.546 | 0.606 |
| 6.016 | 7.436  | 4.058 | 7.774  | 7.586  | 0.931 | 0.606 |
| 6.399 | 6.574  | 3.721 | 6.259  | 6.349  | 0.619 | 0.606 |
| 8.348 | 7.444  | 8.566 | 7.014  | 7.160  | 0.415 | 0.606 |
| 9.263 | 7.969  | 9.751 | 7.346  | 7.495  | 0.574 | 0.606 |
| 5.577 | 5.264  | 5.577 | 5.018  | 5.204  | 0.431 | 0.606 |
| 4.899 | 4.404  | 5.359 | 3.587  | 4.305  | 0.518 | 0.606 |
| 7.493 | 8.224  | 7.418 | 8.460  | 8.075  | 0.384 | 0.606 |
| 7.705 | 6.420  | 8.759 | 5.638  | 5.753  | 0.654 | 0.606 |
| 4.829 | 4.603  | 4.913 | 2.911  | 3.954  | 0.614 | 0.606 |
| 2.002 | 2.283  | 2.646 | 2.253  | 2.113  | 0.336 | 0.606 |
| 1.657 | 1.973  | 1.814 | 2.306  | 1.776  | 0.426 | 0.606 |
| 2.136 | 3.150  | 2.812 | 2.345  | 2.573  | 0.486 | 0.606 |
| 4.435 | 4.384  | 2.731 | 5.286  | 4.987  | 0.541 | 0.606 |
| 5.585 | 6.033  | 5.038 | 6.412  | 5.956  | 0.415 | 0.606 |
| 7.412 | 7.633  | 2.923 | 7.980  | 7.860  | 1.101 | 0.606 |
| 5.167 | 5.292  | 3.911 | 5.208  | 5.551  | 0.411 | 0.606 |
| 2.632 | 2.418  | 2.474 | 3.444  | 2.944  | 0.619 | 0.606 |
| 3.718 | 5.152  | 3.470 | 5.380  | 4.968  | 0.530 | 0.606 |
| 4.832 | 4.101  | 4.680 | 3.967  | 4.061  | 0.383 | 0.606 |
| 3.451 | 3.275  | 3.835 | 2.824  | 4.070  | 0.499 | 0.606 |
| 3.027 | 2.604  | 4.153 | 3.710  | 2.996  | 0.510 | 0.606 |
| 5.822 | 6.527  | 5.482 | 6.971  | 6.928  | 0.493 | 0.606 |
| 3.861 | 4.601  | 3.294 | 5.821  | 5.755  | 0.575 | 0.606 |
| 2.261 | 2.135  | 2.520 | 1.884  | 2.274  | 0.503 | 0.606 |
| 1.765 | 2.818  | 2.353 | 3.003  | 3.713  | 0.503 | 0.606 |
| 7.482 | 7.679  | 6.282 | 8.272  | 8.068  | 0.459 | 0.606 |
| 6.037 | 6.205  | 5.957 | 6.719  | 6.822  | 0.331 | 0.606 |
| 1.998 | 1.552  | 3.521 | 1.639  | 2.039  | 0.572 | 0.606 |
| 2.407 | 2.670  | 2.168 | 2.681  | 2.307  | 0.465 | 0.606 |
| 2.015 | 1.318  | 1.867 | 2.177  | 2.385  | 0.531 | 0.606 |
| 3.268 | 4.031  | 2.071 | 5.070  | 5.360  | 0.766 | 0.606 |
| 2.518 | 2.198  | 2.547 | 2.442  | 2.442  | 0.346 | 0.606 |
| 2.890 | 3.500  | 1.871 | 4.143  | 3.893  | 0.613 | 0.606 |

|       |       |       |       |       |       |       |
|-------|-------|-------|-------|-------|-------|-------|
| 7.062 | 6.526 | 7.937 | 6.092 | 6.068 | 0.508 | 0.606 |
| 4.675 | 3.792 | 5.237 | 2.373 | 2.147 | 0.901 | 0.606 |
| 7.113 | 6.308 | 6.847 | 6.171 | 5.920 | 0.431 | 0.606 |
| 6.742 | 5.197 | 6.752 | 4.524 | 4.890 | 0.579 | 0.606 |
| 1.493 | 4.461 | 2.283 | 5.428 | 4.565 | 0.879 | 0.606 |
| 2.675 | 1.924 | 1.557 | 3.254 | 1.922 | 0.571 | 0.606 |
| 4.603 | 6.463 | 3.268 | 6.834 | 6.682 | 1.030 | 0.606 |
| 3.940 | 4.618 | 5.016 | 3.556 | 4.234 | 0.553 | 0.606 |
| 6.024 | 5.584 | 5.252 | 6.304 | 5.878 | 0.504 | 0.606 |
| 7.348 | 6.141 | 7.816 | 6.201 | 6.390 | 0.468 | 0.606 |
| 3.542 | 4.036 | 3.170 | 3.585 | 5.015 | 0.465 | 0.606 |
| 3.811 | 3.506 | 3.466 | 4.512 | 5.936 | 0.978 | 0.606 |
| 6.535 | 6.598 | 6.283 | 6.785 | 6.811 | 0.351 | 0.606 |
| 3.269 | 1.165 | 1.657 | 1.029 | 1.186 | 0.931 | 0.606 |
| 8.927 | 8.959 | 8.731 | 8.336 | 8.992 | 0.344 | 0.606 |
| 5.149 | 5.198 | 4.257 | 5.435 | 5.497 | 0.395 | 0.606 |
| 3.816 | 3.009 | 3.949 | 3.128 | 3.052 | 0.386 | 0.606 |
| 4.266 | 3.954 | 4.962 | 3.800 | 4.147 | 0.465 | 0.606 |
| 4.957 | 5.597 | 5.451 | 4.497 | 5.221 | 0.407 | 0.606 |
| 7.119 | 5.552 | 7.581 | 6.370 | 6.249 | 0.518 | 0.606 |
| 1.922 | 2.295 | 3.767 | 1.820 | 2.079 | 0.498 | 0.606 |
| 7.800 | 7.769 | 6.265 | 7.115 | 6.654 | 0.513 | 0.606 |
| 5.869 | 5.512 | 6.557 | 4.662 | 4.964 | 0.470 | 0.606 |
| 5.157 | 5.943 | 4.487 | 6.014 | 5.858 | 0.510 | 0.606 |
| 3.722 | 3.078 | 3.598 | 2.920 | 3.208 | 0.434 | 0.606 |
| 6.246 | 5.797 | 6.855 | 5.328 | 5.129 | 0.412 | 0.606 |
| 4.376 | 5.389 | 3.846 | 6.550 | 5.890 | 0.625 | 0.606 |
| 3.966 | 4.159 | 3.302 | 4.632 | 3.687 | 0.478 | 0.606 |
| 6.668 | 7.188 | 6.107 | 7.323 | 7.206 | 0.358 | 0.606 |
| 6.256 | 6.618 | 5.806 | 6.780 | 6.480 | 0.383 | 0.606 |
| 2.918 | 3.399 | 2.333 | 3.350 | 3.169 | 0.478 | 0.606 |
| 5.053 | 5.091 | 5.836 | 5.379 | 4.776 | 0.340 | 0.606 |
| 4.730 | 5.842 | 4.238 | 6.092 | 5.500 | 0.554 | 0.606 |
| 4.822 | 4.666 | 4.858 | 4.911 | 5.674 | 0.594 | 0.606 |
| 4.440 | 4.195 | 3.440 | 4.676 | 4.533 | 0.664 | 0.606 |
| 8.084 | 7.810 | 6.797 | 8.036 | 8.122 | 0.416 | 0.606 |
| 5.776 | 5.784 | 4.973 | 5.825 | 5.862 | 0.339 | 0.606 |
| 4.281 | 3.959 | 4.119 | 4.750 | 4.124 | 0.446 | 0.606 |
| 2.816 | 2.436 | 2.830 | 2.623 | 2.578 | 0.377 | 0.606 |
| 5.104 | 4.733 | 5.413 | 4.350 | 4.275 | 0.393 | 0.606 |
| 7.288 | 7.341 | 6.147 | 7.912 | 7.888 | 0.415 | 0.606 |
| 7.135 | 6.848 | 5.802 | 7.110 | 7.070 | 0.410 | 0.606 |
| 7.485 | 7.631 | 7.078 | 7.988 | 8.084 | 0.348 | 0.606 |
| 3.206 | 3.927 | 3.368 | 4.116 | 4.492 | 0.401 | 0.606 |
| 4.597 | 2.836 | 2.836 | 2.746 | 2.789 | 0.604 | 0.606 |
| 2.417 | 1.811 | 1.869 | 2.307 | 2.081 | 0.528 | 0.606 |
| 4.220 | 1.851 | 1.946 | 1.893 | 1.767 | 1.035 | 0.606 |
| 2.435 | 2.976 | 3.618 | 1.557 | 2.344 | 0.593 | 0.606 |
| 4.396 | 3.412 | 5.474 | 3.370 | 3.370 | 0.536 | 0.606 |
| 6.822 | 7.420 | 7.249 | 7.398 | 7.365 | 0.385 | 0.606 |



|       |       |        |       |       |       |       |
|-------|-------|--------|-------|-------|-------|-------|
| 7.199 | 7.107 | 7.079  | 7.137 | 7.183 | 0.376 | 0.606 |
| 5.773 | 5.843 | 6.127  | 5.344 | 5.707 | 0.362 | 0.606 |
| 5.667 | 2.498 | 2.000  | 2.843 | 2.865 | 0.797 | 0.606 |
| 2.430 | 2.497 | 2.423  | 2.322 | 2.404 | 0.501 | 0.606 |
| 3.155 | 2.872 | 2.799  | 2.517 | 3.901 | 0.644 | 0.606 |
| 4.409 | 5.769 | 6.546  | 3.247 | 3.152 | 1.480 | 0.606 |
| 4.137 | 4.950 | 3.856  | 3.891 | 5.379 | 0.578 | 0.606 |
| 4.231 | 4.716 | 3.769  | 4.644 | 5.022 | 0.400 | 0.606 |
| 4.255 | 3.544 | 5.657  | 3.046 | 3.373 | 0.730 | 0.606 |
| 9.923 | 9.137 | 10.501 | 8.715 | 8.940 | 0.460 | 0.606 |
| 6.916 | 6.201 | 6.617  | 5.990 | 7.084 | 0.772 | 0.606 |
| 3.792 | 4.105 | 3.615  | 4.088 | 3.920 | 0.494 | 0.606 |
| 3.494 | 4.573 | 3.670  | 3.831 | 4.289 | 0.532 | 0.606 |
| 8.509 | 6.171 | 7.108  | 6.698 | 6.636 | 0.711 | 0.606 |
| 8.289 | 8.129 | 5.106  | 8.193 | 8.502 | 0.789 | 0.606 |
| 3.647 | 3.795 | 3.954  | 2.396 | 3.232 | 0.478 | 0.606 |
| 3.201 | 2.809 | 2.764  | 3.960 | 3.659 | 0.408 | 0.606 |
| 8.507 | 8.316 | 8.719  | 7.820 | 8.165 | 0.327 | 0.606 |
| 5.367 | 5.675 | 5.991  | 4.891 | 4.940 | 0.456 | 0.606 |
| 2.620 | 2.137 | 2.121  | 2.939 | 2.299 | 0.650 | 0.606 |
| 3.298 | 1.925 | 1.756  | 2.349 | 2.295 | 0.762 | 0.606 |
| 4.112 | 3.952 | 3.521  | 4.323 | 3.903 | 0.308 | 0.606 |
| 4.782 | 5.044 | 4.306  | 5.588 | 5.101 | 0.436 | 0.606 |
| 8.765 | 8.035 | 8.515  | 7.241 | 7.620 | 0.523 | 0.606 |
| 4.340 | 4.537 | 4.155  | 4.040 | 4.611 | 0.352 | 0.606 |
| 2.600 | 1.572 | 2.218  | 2.516 | 2.640 | 0.561 | 0.606 |
| 3.322 | 3.353 | 2.341  | 4.239 | 4.064 | 0.484 | 0.606 |
| 5.331 | 5.384 | 6.527  | 3.794 | 4.224 | 0.508 | 0.606 |
| 5.898 | 6.280 | 4.780  | 5.997 | 6.020 | 0.425 | 0.606 |
| 4.662 | 4.826 | 5.680  | 4.101 | 3.842 | 0.607 | 0.606 |
| 2.444 | 3.145 | 3.313  | 2.804 | 2.495 | 0.457 | 0.606 |
| 5.698 | 5.965 | 3.220  | 6.516 | 6.282 | 0.717 | 0.606 |
| 4.562 | 5.849 | 3.509  | 6.552 | 6.012 | 0.723 | 0.606 |
| 4.269 | 5.941 | 4.537  | 6.252 | 6.295 | 0.728 | 0.606 |
| 4.637 | 6.108 | 2.741  | 6.588 | 5.939 | 0.898 | 0.606 |
| 7.526 | 8.328 | 6.576  | 8.565 | 8.765 | 0.468 | 0.606 |
| 7.699 | 7.427 | 6.372  | 7.581 | 7.462 | 0.391 | 0.606 |
| 5.766 | 4.386 | 6.417  | 4.172 | 4.012 | 0.602 | 0.606 |
| 2.215 | 2.814 | 2.668  | 2.556 | 2.866 | 0.367 | 0.606 |
| 3.870 | 3.128 | 2.363  | 2.845 | 2.727 | 0.515 | 0.606 |
| 6.144 | 5.620 | 5.734  | 6.574 | 6.250 | 0.525 | 0.606 |
| 5.676 | 5.205 | 4.162  | 5.552 | 5.347 | 0.545 | 0.606 |
| 3.233 | 4.912 | 3.035  | 4.618 | 4.978 | 0.654 | 0.606 |
| 1.910 | 3.289 | 2.178  | 2.888 | 3.597 | 0.451 | 0.606 |
| 6.741 | 6.742 | 5.736  | 7.124 | 7.138 | 0.393 | 0.606 |
| 3.201 | 3.632 | 3.757  | 3.100 | 3.050 | 0.451 | 0.606 |
| 4.808 | 5.884 | 5.019  | 5.105 | 5.383 | 0.383 | 0.606 |
| 5.998 | 7.427 | 5.891  | 7.913 | 7.446 | 0.613 | 0.606 |
| 4.882 | 4.634 | 4.887  | 3.908 | 4.597 | 0.443 | 0.606 |
| 4.545 | 2.768 | 3.031  | 2.904 | 3.280 | 0.576 | 0.606 |

|       |       |       |       |       |       |       |
|-------|-------|-------|-------|-------|-------|-------|
| 4.381 | 4.502 | 4.177 | 5.215 | 5.256 | 0.397 | 0.606 |
| 3.310 | 4.319 | 3.199 | 3.678 | 4.248 | 0.458 | 0.606 |
| 5.633 | 6.232 | 5.697 | 6.146 | 6.129 | 0.313 | 0.606 |
| 4.395 | 4.145 | 4.444 | 4.200 | 3.741 | 1.031 | 0.606 |
| 7.772 | 7.994 | 7.687 | 8.258 | 8.586 | 0.314 | 0.606 |
| 5.387 | 4.988 | 6.532 | 3.705 | 4.845 | 0.606 | 0.606 |
| 2.620 | 3.171 | 2.625 | 3.166 | 3.126 | 0.382 | 0.606 |
| 3.748 | 4.421 | 4.414 | 3.896 | 3.880 | 0.593 | 0.606 |
| 6.270 | 5.956 | 4.759 | 6.192 | 6.709 | 0.516 | 0.606 |
| 7.927 | 7.575 | 4.987 | 8.308 | 8.235 | 0.984 | 0.606 |
| 5.816 | 5.919 | 2.246 | 6.593 | 5.973 | 0.835 | 0.606 |
| 7.927 | 7.579 | 8.634 | 7.075 | 7.237 | 0.395 | 0.606 |
| 2.302 | 2.360 | 3.050 | 1.545 | 2.528 | 0.511 | 0.606 |
| 4.263 | 4.546 | 3.497 | 4.869 | 4.966 | 0.485 | 0.606 |
| 3.248 | 3.347 | 2.940 | 3.986 | 3.941 | 0.353 | 0.606 |
| 4.253 | 6.265 | 3.580 | 6.187 | 5.594 | 0.636 | 0.606 |
| 4.327 | 3.551 | 3.900 | 3.175 | 4.295 | 0.436 | 0.606 |
| 8.094 | 8.653 | 8.921 | 8.407 | 8.276 | 0.459 | 0.606 |
| 8.164 | 7.578 | 8.640 | 6.250 | 6.246 | 0.566 | 0.606 |
| 7.550 | 7.656 | 3.789 | 7.997 | 8.087 | 0.849 | 0.606 |
| 3.356 | 3.780 | 2.975 | 4.487 | 4.118 | 0.464 | 0.606 |
| 2.875 | 2.521 | 2.706 | 2.826 | 2.435 | 0.402 | 0.606 |
| 7.783 | 6.768 | 8.488 | 5.226 | 5.637 | 0.723 | 0.606 |
| 6.430 | 7.005 | 7.098 | 6.370 | 7.022 | 0.450 | 0.606 |
| 7.194 | 6.997 | 4.388 | 7.873 | 7.651 | 0.796 | 0.606 |
| 7.018 | 6.748 | 7.625 | 5.819 | 6.085 | 0.470 | 0.606 |
| 5.854 | 6.220 | 5.818 | 5.910 | 6.116 | 0.357 | 0.606 |
| 2.953 | 2.850 | 3.187 | 2.875 | 2.440 | 0.468 | 0.606 |
| 6.989 | 6.621 | 7.496 | 6.255 | 6.442 | 0.367 | 0.606 |
| 2.687 | 3.681 | 3.646 | 4.882 | 4.320 | 0.553 | 0.606 |
| 5.668 | 5.991 | 6.443 | 5.757 | 6.036 | 0.441 | 0.606 |
| 3.238 | 3.938 | 4.824 | 4.562 | 4.271 | 0.428 | 0.606 |
| 2.475 | 3.522 | 3.387 | 2.639 | 2.539 | 0.454 | 0.606 |
| 6.168 | 4.606 | 4.733 | 3.013 | 4.355 | 0.789 | 0.606 |
| 2.553 | 3.584 | 3.939 | 3.602 | 3.044 | 0.476 | 0.606 |
| 5.680 | 5.653 | 7.077 | 5.946 | 5.428 | 0.391 | 0.606 |
| 4.957 | 4.881 | 5.026 | 4.366 | 4.395 | 0.350 | 0.606 |
| 4.490 | 4.706 | 3.772 | 5.472 | 5.494 | 0.412 | 0.606 |
| 4.854 | 5.159 | 3.833 | 5.643 | 5.990 | 0.483 | 0.606 |
| 4.610 | 5.409 | 5.469 | 4.132 | 4.572 | 0.682 | 0.606 |
| 4.496 | 4.891 | 4.814 | 4.120 | 4.533 | 0.380 | 0.606 |
| 6.434 | 7.584 | 6.909 | 6.031 | 6.544 | 0.491 | 0.606 |
| 1.334 | 1.653 | 2.214 | 0.950 | 1.604 | 0.673 | 0.606 |
| 1.671 | 1.463 | 3.431 | 1.445 | 1.180 | 0.715 | 0.606 |
| 1.354 | 2.950 | 1.735 | 3.250 | 3.285 | 0.497 | 0.606 |
| 3.112 | 5.327 | 5.882 | 5.972 | 6.168 | 0.881 | 0.606 |
| 1.987 | 3.911 | 4.886 | 4.355 | 3.492 | 0.672 | 0.606 |
| 4.038 | 7.240 | 2.168 | 7.575 | 7.269 | 1.152 | 0.606 |
| 7.653 | 6.752 | 8.166 | 6.231 | 6.629 | 0.454 | 0.606 |
| 5.751 | 5.440 | 5.841 | 4.389 | 6.324 | 0.449 | 0.606 |

|        |       |        |       |       |       |       |
|--------|-------|--------|-------|-------|-------|-------|
| 5.176  | 4.385 | 4.242  | 4.764 | 5.021 | 0.699 | 0.606 |
| 4.686  | 4.099 | 4.050  | 3.735 | 4.271 | 0.486 | 0.606 |
| 5.189  | 5.692 | 4.875  | 4.672 | 5.141 | 0.410 | 0.606 |
| 2.094  | 2.739 | 2.122  | 2.114 | 2.238 | 0.414 | 0.606 |
| 4.676  | 5.134 | 3.710  | 5.161 | 5.312 | 0.449 | 0.606 |
| 3.270  | 2.961 | 2.507  | 2.044 | 3.167 | 0.469 | 0.606 |
| 6.786  | 5.277 | 6.884  | 4.727 | 4.774 | 0.626 | 0.606 |
| 4.052  | 2.993 | 3.791  | 2.528 | 3.412 | 0.554 | 0.606 |
| 10.635 | 9.380 | 11.003 | 8.191 | 8.609 | 0.652 | 0.606 |
| 6.811  | 4.454 | 7.193  | 3.108 | 3.493 | 0.973 | 0.606 |
| 7.763  | 7.366 | 8.632  | 7.280 | 7.454 | 0.457 | 0.606 |
| 6.162  | 6.937 | 6.442  | 7.467 | 7.812 | 0.478 | 0.606 |
| 6.851  | 5.586 | 8.356  | 4.303 | 5.081 | 0.866 | 0.606 |
| 3.630  | 3.380 | 3.843  | 3.019 | 3.440 | 0.374 | 0.606 |
| 3.658  | 3.368 | 3.941  | 3.326 | 3.289 | 0.461 | 0.606 |
| 5.562  | 6.204 | 2.307  | 6.170 | 6.331 | 0.874 | 0.606 |
| 3.340  | 2.753 | 3.990  | 2.549 | 2.613 | 0.426 | 0.606 |
| 3.067  | 3.114 | 2.903  | 3.403 | 2.353 | 0.478 | 0.606 |
| 3.662  | 3.269 | 4.175  | 3.144 | 3.570 | 0.421 | 0.606 |
| 6.316  | 6.666 | 5.018  | 6.789 | 6.888 | 0.432 | 0.606 |
| 3.855  | 4.472 | 3.941  | 3.975 | 4.898 | 0.401 | 0.606 |
| 6.295  | 6.914 | 5.255  | 7.800 | 6.996 | 0.701 | 0.606 |
| 1.647  | 2.246 | 3.574  | 2.427 | 2.001 | 0.589 | 0.606 |
| 3.537  | 3.783 | 4.207  | 3.959 | 3.988 | 0.516 | 0.606 |
| 7.432  | 7.070 | 5.407  | 7.449 | 7.422 | 0.507 | 0.606 |
| 2.513  | 2.705 | 1.620  | 3.047 | 3.059 | 0.406 | 0.606 |
| 3.420  | 2.711 | 3.294  | 3.227 | 3.280 | 0.395 | 0.606 |
| 4.142  | 4.468 | 3.546  | 5.458 | 4.734 | 0.457 | 0.606 |
| 5.491  | 7.598 | 3.445  | 8.317 | 7.693 | 0.909 | 0.606 |
| 5.893  | 6.479 | 4.349  | 6.972 | 6.651 | 0.560 | 0.606 |
| 2.601  | 3.296 | 1.336  | 3.238 | 3.487 | 0.542 | 0.606 |
| 5.117  | 5.824 | 2.967  | 6.249 | 6.628 | 0.690 | 0.606 |
| 4.353  | 4.197 | 3.120  | 4.790 | 4.566 | 0.404 | 0.606 |
| 4.135  | 7.078 | 3.242  | 7.130 | 7.036 | 0.881 | 0.606 |
| 6.745  | 6.192 | 7.084  | 6.025 | 6.518 | 0.416 | 0.606 |
| 4.514  | 3.160 | 3.611  | 3.247 | 3.525 | 0.430 | 0.606 |
| 3.827  | 6.029 | 2.836  | 6.432 | 6.339 | 0.822 | 0.606 |
| 4.557  | 2.925 | 4.662  | 3.553 | 3.315 | 0.499 | 0.606 |
| 3.784  | 4.207 | 2.407  | 4.342 | 4.256 | 0.459 | 0.606 |
| 6.203  | 5.644 | 7.039  | 5.204 | 5.713 | 0.405 | 0.606 |
| 3.408  | 3.376 | 3.024  | 2.458 | 3.027 | 0.402 | 0.606 |
| 3.193  | 3.097 | 3.297  | 3.062 | 3.375 | 0.428 | 0.606 |
| 6.805  | 7.364 | 6.791  | 7.697 | 7.374 | 0.423 | 0.606 |
| 5.368  | 5.631 | 5.751  | 5.089 | 5.683 | 0.487 | 0.606 |
| 2.556  | 1.894 | 2.128  | 1.814 | 2.610 | 0.571 | 0.606 |
| 5.144  | 4.433 | 4.814  | 4.513 | 4.426 | 0.380 | 0.606 |
| 8.457  | 7.864 | 9.024  | 7.273 | 7.577 | 0.423 | 0.606 |
| 6.598  | 5.502 | 7.497  | 4.114 | 4.636 | 0.755 | 0.606 |
| 7.183  | 7.665 | 7.121  | 8.039 | 7.964 | 0.389 | 0.606 |
| 5.459  | 6.080 | 3.450  | 6.967 | 6.372 | 0.664 | 0.606 |

|       |       |       |       |       |       |       |
|-------|-------|-------|-------|-------|-------|-------|
| 1.983 | 2.293 | 1.725 | 3.007 | 2.609 | 0.448 | 0.606 |
| 3.500 | 3.849 | 4.947 | 3.755 | 3.841 | 0.416 | 0.606 |
| 4.516 | 3.999 | 4.692 | 3.280 | 4.039 | 0.497 | 0.606 |
| 4.555 | 5.535 | 2.400 | 6.233 | 6.291 | 0.890 | 0.606 |
| 7.314 | 7.296 | 7.323 | 7.747 | 7.693 | 0.346 | 0.606 |
| 3.589 | 3.010 | 3.364 | 3.277 | 3.332 | 0.327 | 0.606 |
| 5.610 | 4.954 | 5.620 | 4.760 | 5.390 | 0.467 | 0.606 |
| 9.175 | 8.230 | 9.880 | 6.754 | 7.395 | 0.669 | 0.606 |
| 5.328 | 6.229 | 5.175 | 6.144 | 6.274 | 0.476 | 0.606 |
| 3.121 | 1.059 | 2.176 | 2.637 | 3.003 | 0.540 | 0.606 |
| 4.678 | 4.376 | 3.222 | 5.203 | 5.410 | 0.556 | 0.606 |
| 3.712 | 4.510 | 2.242 | 4.393 | 4.762 | 0.548 | 0.606 |
| 3.814 | 3.533 | 4.133 | 3.215 | 4.570 | 0.379 | 0.606 |
| 7.933 | 7.480 | 8.182 | 7.619 | 8.617 | 0.682 | 0.606 |
| 7.310 | 8.310 | 7.729 | 8.196 | 8.354 | 0.425 | 0.606 |
| 4.206 | 4.483 | 3.600 | 4.361 | 5.030 | 0.384 | 0.606 |
| 5.855 | 6.235 | 6.182 | 5.735 | 6.014 | 0.389 | 0.606 |
| 4.849 | 3.601 | 6.382 | 2.642 | 3.306 | 0.736 | 0.606 |
| 3.868 | 3.876 | 4.724 | 2.512 | 3.060 | 0.553 | 0.606 |
| 5.146 | 5.450 | 4.593 | 6.215 | 6.182 | 0.446 | 0.606 |
| 5.473 | 6.191 | 5.950 | 6.337 | 6.329 | 0.397 | 0.606 |
| 5.979 | 6.261 | 6.754 | 6.517 | 6.082 | 0.333 | 0.606 |
| 6.151 | 6.450 | 6.138 | 6.004 | 6.249 | 0.470 | 0.606 |
| 6.454 | 6.622 | 5.552 | 6.950 | 6.854 | 0.386 | 0.606 |
| 2.923 | 4.447 | 1.975 | 4.456 | 4.182 | 0.588 | 0.606 |
| 5.345 | 5.678 | 4.427 | 5.734 | 5.428 | 0.404 | 0.606 |
| 4.422 | 4.648 | 4.413 | 5.541 | 5.588 | 0.496 | 0.606 |
| 4.755 | 4.619 | 5.072 | 5.087 | 5.075 | 0.469 | 0.606 |
| 4.613 | 3.373 | 4.859 | 3.679 | 3.678 | 0.462 | 0.606 |
| 4.537 | 5.357 | 4.768 | 4.198 | 5.026 | 0.500 | 0.606 |
| 4.486 | 5.867 | 5.882 | 4.950 | 6.976 | 0.909 | 0.606 |
| 3.545 | 3.913 | 3.973 | 3.640 | 3.311 | 0.440 | 0.606 |
| 3.655 | 1.837 | 1.712 | 2.163 | 1.769 | 0.757 | 0.606 |
| 6.221 | 7.886 | 6.931 | 6.456 | 6.844 | 0.628 | 0.606 |
| 3.531 | 3.686 | 4.379 | 2.895 | 3.424 | 0.759 | 0.606 |
| 1.801 | 3.217 | 1.815 | 3.037 | 2.876 | 0.464 | 0.606 |
| 8.676 | 7.934 | 7.920 | 7.874 | 8.769 | 0.502 | 0.606 |
| 8.052 | 8.211 | 7.536 | 8.355 | 8.248 | 0.330 | 0.606 |
| 8.258 | 6.488 | 8.895 | 4.994 | 5.350 | 0.818 | 0.606 |
| 5.668 | 5.247 | 6.044 | 5.086 | 5.115 | 0.438 | 0.606 |
| 7.455 | 7.475 | 4.163 | 7.260 | 7.322 | 0.747 | 0.606 |
| 5.579 | 4.300 | 4.064 | 4.709 | 4.831 | 0.524 | 0.606 |
| 5.307 | 6.275 | 5.021 | 6.553 | 6.468 | 0.480 | 0.606 |
| 4.649 | 4.533 | 4.287 | 3.334 | 3.850 | 0.403 | 0.606 |
| 3.784 | 2.534 | 2.177 | 3.511 | 3.522 | 0.517 | 0.606 |
| 3.037 | 3.888 | 3.739 | 3.938 | 3.631 | 0.377 | 0.606 |
| 6.882 | 6.579 | 7.698 | 5.110 | 5.874 | 0.587 | 0.606 |
| 7.562 | 7.823 | 7.078 | 7.920 | 7.820 | 0.332 | 0.606 |
| 4.478 | 5.668 | 4.907 | 5.558 | 5.117 | 0.454 | 0.606 |
| 6.649 | 7.292 | 5.300 | 7.468 | 7.382 | 0.537 | 0.606 |

|       |       |       |       |       |       |       |
|-------|-------|-------|-------|-------|-------|-------|
| 5.157 | 4.995 | 4.961 | 4.998 | 4.912 | 0.493 | 0.606 |
| 3.446 | 3.288 | 3.261 | 3.062 | 3.069 | 0.428 | 0.606 |
| 6.957 | 5.458 | 6.619 | 6.538 | 6.476 | 0.641 | 0.606 |
| 2.832 | 4.431 | 5.184 | 4.993 | 4.205 | 0.466 | 0.606 |
| 2.758 | 3.449 | 3.332 | 4.217 | 2.939 | 0.531 | 0.606 |
| 3.358 | 3.222 | 3.550 | 2.417 | 2.952 | 0.398 | 0.606 |
| 5.083 | 4.941 | 5.854 | 4.312 | 4.639 | 0.369 | 0.606 |
| 6.613 | 6.869 | 5.489 | 7.024 | 6.708 | 0.391 | 0.606 |
| 3.351 | 3.876 | 2.771 | 3.090 | 3.009 | 0.453 | 0.606 |
| 7.500 | 8.094 | 7.250 | 8.622 | 8.505 | 0.425 | 0.606 |
| 3.427 | 3.343 | 3.550 | 2.666 | 3.826 | 0.442 | 0.606 |
| 4.845 | 3.932 | 5.447 | 3.102 | 3.244 | 0.538 | 0.606 |
| 5.875 | 6.544 | 5.157 | 7.160 | 6.906 | 0.437 | 0.606 |
| 4.081 | 5.539 | 5.435 | 4.781 | 4.517 | 0.512 | 0.606 |
| 4.503 | 5.258 | 5.336 | 3.505 | 4.993 | 0.570 | 0.606 |
| 5.729 | 5.167 | 4.693 | 5.092 | 5.066 | 0.388 | 0.606 |
| 4.161 | 5.111 | 4.158 | 5.186 | 4.952 | 0.395 | 0.606 |
| 4.421 | 4.504 | 3.268 | 4.980 | 4.654 | 0.492 | 0.606 |
| 5.685 | 5.791 | 4.316 | 6.241 | 6.051 | 0.474 | 0.606 |
| 5.104 | 5.601 | 5.261 | 6.417 | 5.748 | 0.383 | 0.606 |
| 4.389 | 3.958 | 4.661 | 3.990 | 4.129 | 0.454 | 0.606 |
| 4.890 | 5.285 | 2.380 | 5.870 | 5.056 | 0.753 | 0.606 |
| 2.939 | 2.731 | 2.472 | 3.797 | 3.163 | 0.451 | 0.606 |
| 6.379 | 6.624 | 4.624 | 7.278 | 6.895 | 0.625 | 0.606 |
| 6.035 | 5.146 | 4.255 | 6.171 | 5.697 | 0.621 | 0.606 |
| 5.832 | 6.493 | 5.720 | 6.797 | 6.713 | 0.351 | 0.606 |
| 4.134 | 5.727 | 4.021 | 6.777 | 5.987 | 0.648 | 0.606 |
| 2.083 | 2.990 | 1.722 | 3.082 | 3.065 | 0.495 | 0.606 |
| 4.641 | 7.521 | 4.001 | 7.598 | 7.584 | 0.935 | 0.606 |
| 2.635 | 4.586 | 2.307 | 4.246 | 3.803 | 0.567 | 0.606 |
| 7.175 | 7.735 | 7.258 | 7.843 | 7.894 | 0.344 | 0.606 |
| 6.068 | 6.814 | 4.489 | 7.186 | 6.782 | 0.584 | 0.606 |
| 8.910 | 9.389 | 8.916 | 9.886 | 9.900 | 0.398 | 0.606 |
| 2.814 | 3.377 | 2.722 | 2.383 | 2.180 | 0.512 | 0.606 |
| 6.257 | 5.686 | 6.861 | 5.525 | 5.457 | 0.411 | 0.606 |
| 2.727 | 2.750 | 2.446 | 2.292 | 2.265 | 0.378 | 0.606 |
| 3.480 | 2.407 | 2.347 | 2.348 | 2.107 | 0.500 | 0.606 |
| 6.457 | 6.816 | 7.102 | 7.299 | 7.199 | 0.376 | 0.606 |
| 2.458 | 2.613 | 2.556 | 2.976 | 2.987 | 0.484 | 0.606 |
| 3.032 | 2.510 | 3.311 | 2.682 | 2.270 | 0.445 | 0.606 |
| 5.100 | 5.299 | 4.713 | 5.536 | 5.520 | 0.371 | 0.606 |
| 3.889 | 5.275 | 3.737 | 5.733 | 5.075 | 0.466 | 0.606 |
| 7.120 | 6.414 | 7.261 | 5.877 | 5.466 | 0.663 | 0.606 |
| 4.193 | 3.089 | 2.994 | 3.292 | 3.441 | 0.473 | 0.606 |
| 6.035 | 5.261 | 6.864 | 5.631 | 5.733 | 0.421 | 0.606 |
| 4.059 | 4.414 | 4.869 | 3.642 | 3.730 | 0.445 | 0.606 |
| 4.176 | 4.261 | 4.804 | 4.123 | 4.979 | 0.412 | 0.606 |
| 2.408 | 2.755 | 1.339 | 4.440 | 3.350 | 0.568 | 0.606 |
| 2.374 | 3.311 | 1.563 | 3.697 | 3.768 | 0.517 | 0.606 |
| 4.301 | 4.039 | 5.177 | 2.983 | 3.538 | 0.514 | 0.606 |

|       |       |       |       |       |       |       |
|-------|-------|-------|-------|-------|-------|-------|
| 4.764 | 4.592 | 5.358 | 4.508 | 5.008 | 0.324 | 0.606 |
| 5.262 | 5.102 | 5.783 | 5.501 | 5.927 | 0.366 | 0.606 |
| 2.832 | 2.813 | 2.961 | 2.817 | 3.473 | 0.473 | 0.606 |
| 6.930 | 7.628 | 6.243 | 7.418 | 7.432 | 0.369 | 0.606 |
| 5.206 | 5.650 | 5.430 | 4.736 | 4.745 | 0.533 | 0.606 |
| 3.211 | 4.757 | 3.077 | 5.174 | 4.894 | 0.662 | 0.606 |
| 4.700 | 5.511 | 3.865 | 5.264 | 4.861 | 0.413 | 0.606 |
| 3.222 | 3.629 | 3.406 | 3.259 | 2.578 | 0.583 | 0.606 |
| 5.200 | 4.709 | 4.472 | 5.054 | 5.498 | 0.384 | 0.606 |
| 4.339 | 1.733 | 1.492 | 1.074 | 2.319 | 0.995 | 0.606 |
| 6.389 | 6.907 | 5.938 | 7.152 | 7.212 | 0.371 | 0.606 |
| 5.478 | 4.576 | 5.463 | 4.934 | 4.555 | 0.420 | 0.606 |
| 5.740 | 6.527 | 6.291 | 7.023 | 6.601 | 0.407 | 0.606 |
| 4.262 | 4.092 | 5.225 | 3.601 | 3.978 | 0.471 | 0.606 |
| 4.718 | 3.436 | 5.639 | 2.684 | 2.829 | 0.608 | 0.606 |
| 2.503 | 2.955 | 2.277 | 3.355 | 2.877 | 0.441 | 0.606 |
| 4.526 | 4.203 | 4.383 | 2.680 | 3.102 | 0.549 | 0.606 |
| 1.902 | 2.181 | 2.709 | 1.255 | 2.431 | 0.615 | 0.606 |
| 2.907 | 3.237 | 2.947 | 4.228 | 2.936 | 0.444 | 0.606 |
| 3.937 | 3.151 | 3.638 | 3.950 | 3.811 | 0.598 | 0.606 |
| 5.076 | 4.287 | 3.539 | 4.665 | 5.334 | 0.498 | 0.606 |
| 2.452 | 2.579 | 1.774 | 1.786 | 3.180 | 0.719 | 0.606 |
| 3.012 | 2.659 | 2.388 | 2.675 | 3.666 | 0.627 | 0.606 |
| 2.364 | 2.735 | 2.770 | 2.376 | 2.835 | 0.510 | 0.606 |
| 3.144 | 3.082 | 3.585 | 2.297 | 3.082 | 0.434 | 0.606 |
| 4.807 | 5.148 | 4.946 | 4.574 | 5.900 | 0.641 | 0.606 |
| 4.641 | 4.508 | 3.233 | 4.371 | 4.503 | 0.514 | 0.606 |
| 3.622 | 2.780 | 2.959 | 3.010 | 3.313 | 0.366 | 0.606 |
| 1.890 | 2.644 | 1.605 | 2.211 | 2.508 | 0.436 | 0.606 |
| 3.110 | 3.017 | 4.156 | 2.986 | 4.641 | 0.657 | 0.606 |
| 6.564 | 7.637 | 6.184 | 8.384 | 8.075 | 0.491 | 0.606 |
| 5.105 | 5.168 | 3.040 | 5.300 | 5.084 | 0.575 | 0.606 |
| 6.381 | 5.492 | 6.703 | 4.222 | 4.533 | 0.563 | 0.606 |
| 5.544 | 6.060 | 3.609 | 6.617 | 6.133 | 0.595 | 0.606 |
| 4.871 | 1.968 | 4.997 | 5.183 | 4.830 | 0.950 | 0.606 |
| 5.074 | 4.958 | 4.465 | 4.447 | 3.784 | 0.610 | 0.606 |
| 4.079 | 1.925 | 4.529 | 3.263 | 2.901 | 0.610 | 0.606 |
| 5.909 | 6.314 | 4.866 | 6.580 | 6.575 | 0.481 | 0.606 |
| 4.756 | 4.027 | 4.465 | 4.423 | 3.632 | 0.493 | 0.606 |
| 4.444 | 3.799 | 4.845 | 3.989 | 4.225 | 0.457 | 0.606 |
| 4.895 | 5.198 | 2.815 | 5.884 | 5.520 | 0.612 | 0.606 |
| 3.988 | 5.113 | 3.249 | 5.584 | 6.118 | 0.580 | 0.606 |
| 2.325 | 3.104 | 1.029 | 4.151 | 2.893 | 0.673 | 0.606 |
| 1.752 | 2.968 | 2.067 | 3.365 | 2.504 | 0.502 | 0.606 |
| 4.309 | 6.077 | 3.600 | 6.363 | 6.424 | 0.689 | 0.606 |
| 4.062 | 4.490 | 5.313 | 3.923 | 4.322 | 0.451 | 0.606 |
| 4.100 | 4.226 | 3.884 | 2.973 | 4.058 | 0.427 | 0.606 |
| 2.454 | 2.375 | 2.375 | 1.470 | 2.131 | 0.435 | 0.606 |
| 2.689 | 2.277 | 2.102 | 1.888 | 2.429 | 0.470 | 0.606 |
| 4.943 | 4.788 | 4.514 | 4.918 | 5.068 | 0.449 | 0.606 |

|       |       |       |       |       |       |       |
|-------|-------|-------|-------|-------|-------|-------|
| 4.478 | 3.132 | 3.264 | 3.740 | 4.207 | 0.482 | 0.606 |
| 3.723 | 3.199 | 2.553 | 2.675 | 4.029 | 0.705 | 0.606 |
| 4.518 | 4.431 | 4.336 | 4.269 | 3.903 | 0.343 | 0.606 |
| 6.521 | 7.420 | 6.831 | 7.820 | 7.816 | 0.414 | 0.606 |
| 3.077 | 1.969 | 2.335 | 1.779 | 3.231 | 0.563 | 0.606 |
| 3.543 | 3.140 | 3.876 | 3.977 | 3.399 | 0.431 | 0.606 |
| 2.473 | 2.992 | 2.700 | 2.889 | 2.505 | 0.461 | 0.606 |
| 3.562 | 3.827 | 3.390 | 3.736 | 2.967 | 0.479 | 0.606 |
| 2.477 | 2.667 | 2.000 | 2.383 | 2.460 | 0.482 | 0.606 |
| 5.671 | 5.055 | 6.496 | 4.640 | 4.829 | 0.467 | 0.606 |
| 2.958 | 2.524 | 2.786 | 2.926 | 2.962 | 0.435 | 0.606 |
| 3.397 | 2.371 | 1.875 | 2.698 | 2.854 | 0.480 | 0.606 |
| 2.846 | 2.663 | 3.776 | 3.184 | 3.312 | 0.443 | 0.606 |
| 8.102 | 7.433 | 8.986 | 7.171 | 7.561 | 0.431 | 0.606 |
| 4.521 | 2.221 | 4.915 | 3.454 | 3.466 | 0.592 | 0.606 |
| 4.439 | 5.654 | 3.705 | 5.714 | 6.098 | 0.562 | 0.606 |
| 5.712 | 6.178 | 5.497 | 6.381 | 5.629 | 0.454 | 0.606 |
| 4.808 | 5.045 | 4.917 | 5.812 | 4.853 | 0.448 | 0.606 |
| 7.561 | 7.640 | 6.786 | 7.645 | 7.790 | 0.396 | 0.606 |
| 3.679 | 4.878 | 5.533 | 4.415 | 4.401 | 0.646 | 0.606 |
| 5.576 | 5.451 | 5.374 | 5.956 | 5.883 | 0.309 | 0.606 |
| 5.171 | 5.055 | 4.963 | 5.617 | 5.704 | 0.375 | 0.606 |
| 7.139 | 6.400 | 7.383 | 6.200 | 6.514 | 0.410 | 0.606 |
| 6.238 | 6.807 | 5.155 | 7.430 | 7.368 | 0.583 | 0.606 |
| 5.677 | 5.455 | 7.044 | 5.636 | 5.862 | 0.447 | 0.606 |
| 1.255 | 2.578 | 1.421 | 2.520 | 2.597 | 0.507 | 0.606 |
| 6.084 | 6.850 | 3.995 | 7.385 | 6.939 | 0.775 | 0.606 |
| 5.541 | 4.524 | 6.431 | 3.563 | 4.432 | 0.601 | 0.606 |
| 5.977 | 5.448 | 2.621 | 5.441 | 5.350 | 0.672 | 0.606 |
| 4.310 | 4.006 | 4.414 | 4.178 | 4.457 | 0.403 | 0.606 |
| 3.941 | 3.599 | 3.315 | 3.004 | 3.592 | 0.431 | 0.606 |
| 4.862 | 4.865 | 4.079 | 4.820 | 5.448 | 0.387 | 0.606 |
| 2.491 | 4.052 | 2.251 | 3.284 | 3.513 | 0.496 | 0.606 |
| 2.733 | 2.170 | 2.507 | 2.638 | 2.804 | 0.513 | 0.606 |
| 6.270 | 6.350 | 5.785 | 6.701 | 6.225 | 0.353 | 0.606 |
| 3.186 | 3.928 | 2.452 | 3.772 | 3.582 | 0.396 | 0.606 |
| 6.397 | 8.989 | 4.396 | 8.885 | 8.614 | 0.961 | 0.606 |
| 6.309 | 6.824 | 5.776 | 7.329 | 7.300 | 0.387 | 0.606 |
| 3.842 | 3.789 | 2.995 | 3.945 | 3.996 | 0.504 | 0.606 |
| 3.622 | 5.058 | 3.780 | 5.234 | 5.238 | 0.525 | 0.606 |
| 5.249 | 6.143 | 4.552 | 6.485 | 6.124 | 0.454 | 0.606 |
| 6.749 | 7.000 | 6.556 | 7.650 | 7.432 | 0.336 | 0.606 |
| 6.545 | 5.905 | 7.185 | 6.076 | 5.967 | 0.374 | 0.606 |
| 3.725 | 3.488 | 4.102 | 3.806 | 3.470 | 0.524 | 0.606 |
| 5.096 | 5.892 | 4.267 | 6.266 | 6.323 | 0.520 | 0.606 |
| 5.708 | 5.159 | 4.291 | 5.509 | 5.070 | 0.382 | 0.606 |
| 4.588 | 4.979 | 4.588 | 5.265 | 5.186 | 0.423 | 0.606 |
| 5.519 | 6.117 | 4.952 | 5.971 | 5.690 | 0.429 | 0.606 |
| 6.193 | 6.769 | 6.419 | 7.063 | 6.785 | 0.327 | 0.606 |
| 5.880 | 6.229 | 5.975 | 6.410 | 6.650 | 0.345 | 0.606 |

|       |       |       |       |       |       |       |
|-------|-------|-------|-------|-------|-------|-------|
| 6.293 | 6.789 | 5.736 | 7.231 | 6.781 | 0.403 | 0.606 |
| 8.121 | 6.767 | 8.005 | 7.525 | 6.842 | 0.462 | 0.606 |
| 5.956 | 6.513 | 5.028 | 7.081 | 6.798 | 0.482 | 0.606 |
| 4.534 | 5.980 | 4.260 | 6.586 | 5.969 | 0.558 | 0.606 |
| 1.598 | 3.420 | 2.540 | 3.956 | 4.294 | 0.624 | 0.606 |
| 4.502 | 5.960 | 3.254 | 6.508 | 6.025 | 0.665 | 0.606 |
| 5.074 | 5.128 | 3.936 | 5.428 | 5.299 | 0.416 | 0.606 |
| 4.588 | 5.718 | 4.974 | 5.743 | 5.674 | 0.375 | 0.606 |
| 3.619 | 4.395 | 4.631 | 4.504 | 4.779 | 0.411 | 0.606 |
| 7.862 | 7.561 | 8.772 | 7.253 | 7.350 | 0.400 | 0.606 |
| 5.682 | 5.351 | 5.264 | 5.717 | 6.233 | 0.396 | 0.606 |
| 7.158 | 8.693 | 5.911 | 9.259 | 8.969 | 0.661 | 0.606 |
| 2.992 | 2.884 | 1.722 | 2.747 | 2.556 | 0.512 | 0.606 |
| 2.541 | 3.125 | 3.373 | 2.664 | 2.466 | 0.615 | 0.606 |
| 6.425 | 7.767 | 7.543 | 4.451 | 6.239 | 0.973 | 0.606 |
| 3.241 | 3.190 | 4.293 | 2.677 | 2.156 | 1.030 | 0.606 |
| 5.367 | 4.656 | 5.612 | 5.053 | 5.453 | 0.906 | 0.606 |
| 3.877 | 3.884 | 4.236 | 3.675 | 3.643 | 0.512 | 0.606 |
| 3.064 | 3.886 | 4.054 | 2.732 | 3.301 | 0.639 | 0.606 |
| 2.057 | 1.695 | 1.964 | 1.051 | 1.476 | 0.688 | 0.606 |
| 4.057 | 4.280 | 4.550 | 3.344 | 3.956 | 0.367 | 0.606 |
| 2.783 | 2.477 | 2.802 | 2.797 | 2.204 | 0.475 | 0.606 |
| 6.404 | 5.610 | 6.270 | 5.065 | 5.352 | 0.452 | 0.606 |
| 3.091 | 3.398 | 2.616 | 3.225 | 3.200 | 0.384 | 0.606 |
| 6.992 | 7.808 | 7.567 | 8.070 | 7.789 | 0.339 | 0.606 |
| 5.635 | 4.005 | 5.092 | 3.892 | 4.242 | 0.567 | 0.606 |
| 3.829 | 4.121 | 4.875 | 3.622 | 3.747 | 0.545 | 0.606 |
| 1.864 | 5.561 | 4.027 | 5.665 | 5.939 | 0.900 | 0.606 |
| 1.804 | 2.668 | 3.050 | 2.442 | 1.262 | 0.606 | 0.606 |
| 1.692 | 4.465 | 1.785 | 4.723 | 3.614 | 0.745 | 0.606 |
| 4.297 | 5.108 | 3.744 | 5.203 | 5.176 | 0.421 | 0.606 |
| 3.908 | 3.605 | 3.932 | 3.324 | 3.747 | 0.478 | 0.606 |
| 2.412 | 1.729 | 2.708 | 2.659 | 1.688 | 0.494 | 0.606 |
| 3.193 | 3.648 | 3.229 | 3.233 | 3.888 | 0.402 | 0.606 |
| 4.814 | 5.335 | 4.977 | 6.090 | 6.061 | 0.443 | 0.606 |
| 4.556 | 3.786 | 5.229 | 2.802 | 3.569 | 0.509 | 0.606 |
| 3.529 | 3.190 | 2.189 | 3.809 | 3.396 | 0.546 | 0.606 |
| 4.668 | 4.929 | 5.205 | 4.348 | 4.302 | 0.497 | 0.606 |
| 4.986 | 5.528 | 2.743 | 6.135 | 6.261 | 0.833 | 0.606 |
| 4.688 | 4.699 | 2.192 | 5.142 | 5.501 | 0.650 | 0.606 |
| 6.130 | 7.448 | 4.296 | 8.000 | 7.720 | 0.806 | 0.606 |
| 4.139 | 2.963 | 3.508 | 1.997 | 3.120 | 0.540 | 0.606 |
| 4.447 | 4.994 | 3.386 | 5.086 | 4.565 | 0.606 | 0.606 |
| 3.652 | 3.616 | 2.960 | 3.926 | 3.332 | 0.481 | 0.606 |
| 2.964 | 3.208 | 2.342 | 3.086 | 3.289 | 0.397 | 0.606 |
| 2.345 | 3.632 | 2.214 | 3.828 | 3.688 | 0.439 | 0.606 |
| 1.694 | 1.332 | 1.649 | 1.768 | 1.459 | 0.629 | 0.606 |
| 4.953 | 5.283 | 1.862 | 5.490 | 6.105 | 0.817 | 0.606 |
| 1.651 | 1.927 | 1.606 | 2.092 | 1.835 | 0.606 | 0.606 |
| 4.287 | 3.721 | 3.988 | 3.679 | 3.380 | 0.297 | 0.606 |



|       |       |       |       |       |       |       |
|-------|-------|-------|-------|-------|-------|-------|
| 5.166 | 5.101 | 6.373 | 5.304 | 4.889 | 0.546 | 0.606 |
| 7.395 | 6.660 | 7.882 | 6.080 | 5.871 | 0.541 | 0.606 |
| 6.743 | 5.872 | 5.575 | 6.000 | 6.425 | 0.544 | 0.606 |
| 6.327 | 4.789 | 7.150 | 5.035 | 5.420 | 0.612 | 0.606 |
| 3.478 | 3.524 | 3.535 | 2.728 | 2.995 | 0.372 | 0.606 |
| 5.841 | 6.011 | 6.011 | 6.328 | 6.599 | 0.371 | 0.606 |
| 3.431 | 2.754 | 2.902 | 2.939 | 2.867 | 0.484 | 0.606 |
| 2.327 | 3.530 | 2.487 | 4.523 | 4.012 | 0.570 | 0.606 |
| 4.116 | 3.865 | 4.379 | 3.357 | 3.729 | 0.433 | 0.606 |
| 5.223 | 4.565 | 4.446 | 5.333 | 4.778 | 0.647 | 0.606 |
| 6.869 | 6.525 | 4.800 | 7.278 | 6.957 | 0.577 | 0.606 |
| 4.877 | 5.052 | 5.600 | 5.010 | 5.275 | 0.373 | 0.606 |
| 2.864 | 2.835 | 3.425 | 2.864 | 2.617 | 0.323 | 0.606 |
| 6.139 | 6.673 | 6.072 | 7.074 | 6.977 | 0.363 | 0.606 |
| 3.938 | 3.696 | 4.459 | 4.167 | 4.253 | 0.410 | 0.606 |
| 3.839 | 3.979 | 3.094 | 4.032 | 4.205 | 0.452 | 0.606 |
| 2.844 | 1.804 | 2.178 | 1.944 | 2.463 | 0.375 | 0.606 |
| 5.152 | 5.424 | 4.087 | 5.543 | 5.851 | 0.483 | 0.606 |
| 4.316 | 4.686 | 4.628 | 4.388 | 4.606 | 0.359 | 0.606 |
| 4.019 | 4.895 | 3.651 | 5.176 | 4.849 | 0.445 | 0.606 |
| 3.378 | 3.742 | 2.168 | 4.431 | 4.267 | 0.563 | 0.606 |
| 6.785 | 6.798 | 7.396 | 6.918 | 6.914 | 0.477 | 0.606 |
| 4.910 | 5.170 | 5.924 | 4.901 | 4.911 | 0.556 | 0.606 |
| 3.881 | 3.226 | 3.874 | 3.430 | 3.777 | 0.430 | 0.606 |
| 9.702 | 8.519 | 9.461 | 8.660 | 8.791 | 0.388 | 0.606 |
| 5.532 | 5.129 | 5.221 | 5.221 | 5.326 | 0.444 | 0.606 |
| 4.311 | 3.073 | 4.149 | 4.338 | 3.334 | 0.471 | 0.606 |
| 3.786 | 3.390 | 3.310 | 2.584 | 3.737 | 0.431 | 0.606 |
| 7.169 | 6.718 | 7.011 | 6.350 | 6.245 | 0.335 | 0.606 |
| 1.678 | 2.268 | 1.467 | 2.236 | 1.532 | 0.441 | 0.606 |
| 4.966 | 5.604 | 4.554 | 6.688 | 6.219 | 0.527 | 0.606 |
| 4.014 | 2.803 | 3.887 | 3.014 | 2.509 | 0.532 | 0.606 |
| 4.030 | 5.272 | 2.833 | 5.440 | 5.277 | 0.643 | 0.606 |
| 1.053 | 2.811 | 1.615 | 3.190 | 2.884 | 0.597 | 0.606 |
| 3.838 | 3.766 | 5.087 | 3.096 | 3.542 | 0.516 | 0.606 |
| 2.233 | 2.965 | 2.994 | 1.693 | 2.943 | 0.433 | 0.606 |
| 1.808 | 2.516 | 3.118 | 2.559 | 3.100 | 0.360 | 0.606 |
| 2.089 | 2.611 | 3.045 | 1.867 | 2.440 | 0.462 | 0.606 |
| 1.550 | 2.896 | 1.804 | 3.273 | 2.965 | 0.481 | 0.606 |
| 2.262 | 2.824 | 2.326 | 2.068 | 2.517 | 0.391 | 0.606 |
| 2.462 | 1.943 | 2.277 | 2.267 | 2.829 | 0.401 | 0.606 |
| 3.125 | 3.155 | 3.548 | 2.644 | 2.878 | 0.423 | 0.606 |
| 3.775 | 3.047 | 4.119 | 3.481 | 3.395 | 0.431 | 0.606 |
| 4.346 | 5.522 | 2.481 | 5.961 | 5.171 | 0.657 | 0.606 |
| 3.490 | 4.419 | 1.531 | 4.542 | 4.703 | 0.714 | 0.606 |
| 3.263 | 3.004 | 2.755 | 3.546 | 3.078 | 0.456 | 0.606 |
| 4.510 | 5.160 | 5.189 | 5.043 | 4.924 | 0.444 | 0.606 |
| 2.356 | 2.671 | 2.730 | 3.028 | 2.730 | 0.480 | 0.606 |
| 3.110 | 3.330 | 2.079 | 2.527 | 2.687 | 0.411 | 0.606 |
| 3.047 | 2.966 | 2.135 | 3.664 | 3.618 | 0.425 | 0.606 |

|        |       |        |       |       |       |       |
|--------|-------|--------|-------|-------|-------|-------|
| 5.311  | 5.787 | 5.659  | 5.021 | 5.383 | 0.409 | 0.606 |
| 6.764  | 5.655 | 6.479  | 5.515 | 5.477 | 0.414 | 0.606 |
| 5.979  | 5.677 | 6.754  | 4.200 | 4.582 | 0.607 | 0.606 |
| 4.699  | 5.501 | 4.475  | 6.958 | 6.538 | 0.664 | 0.606 |
| 4.284  | 4.983 | 3.902  | 5.626 | 5.786 | 0.631 | 0.606 |
| 6.611  | 6.741 | 6.303  | 6.791 | 7.041 | 0.451 | 0.606 |
| 4.171  | 3.094 | 1.496  | 3.006 | 3.252 | 0.525 | 0.606 |
| 3.812  | 3.931 | 3.949  | 4.167 | 4.239 | 0.371 | 0.606 |
| 3.045  | 2.473 | 3.086  | 1.780 | 2.129 | 0.394 | 0.606 |
| 5.109  | 5.748 | 3.626  | 5.973 | 5.781 | 0.519 | 0.606 |
| 10.249 | 9.239 | 10.494 | 8.785 | 8.769 | 0.475 | 0.606 |
| 5.708  | 4.809 | 6.105  | 4.809 | 5.409 | 0.447 | 0.606 |
| 2.551  | 2.922 | 2.167  | 2.509 | 2.639 | 0.497 | 0.606 |
| 3.361  | 2.431 | 3.953  | 2.111 | 2.310 | 0.613 | 0.606 |
| 3.702  | 3.155 | 3.996  | 2.734 | 2.610 | 0.514 | 0.606 |
| 2.909  | 4.092 | 2.730  | 3.610 | 5.143 | 0.665 | 0.606 |
| 7.079  | 7.620 | 6.386  | 6.973 | 7.342 | 0.489 | 0.606 |
| 8.640  | 7.349 | 8.698  | 7.127 | 7.192 | 0.475 | 0.606 |
| 7.075  | 6.214 | 6.537  | 6.727 | 6.675 | 0.370 | 0.606 |
| 6.308  | 6.252 | 6.830  | 6.312 | 6.186 | 0.349 | 0.606 |
| 5.904  | 6.788 | 4.480  | 6.331 | 6.498 | 0.635 | 0.606 |
| 5.105  | 4.570 | 3.005  | 5.117 | 5.234 | 0.523 | 0.606 |
| 5.991  | 5.442 | 3.280  | 6.664 | 5.799 | 0.717 | 0.606 |
| 5.706  | 6.404 | 6.507  | 6.583 | 6.278 | 0.353 | 0.606 |
| 6.568  | 6.160 | 7.280  | 5.754 | 6.027 | 0.387 | 0.606 |
| 7.333  | 7.133 | 5.777  | 6.913 | 7.312 | 0.421 | 0.606 |
| 7.610  | 6.195 | 8.607  | 3.888 | 5.781 | 0.952 | 0.606 |
| 2.670  | 2.589 | 3.679  | 1.740 | 2.413 | 0.465 | 0.606 |
| 2.103  | 1.278 | 2.103  | 0.855 | 2.154 | 0.497 | 0.606 |
| 2.411  | 2.788 | 2.781  | 2.917 | 4.175 | 0.522 | 0.606 |
| 5.955  | 6.969 | 5.589  | 5.749 | 4.132 | 0.653 | 0.606 |
| 4.136  | 3.911 | 3.031  | 3.878 | 4.341 | 0.575 | 0.606 |
| 3.338  | 2.434 | 2.911  | 3.666 | 1.540 | 0.530 | 0.606 |
| 5.315  | 6.064 | 5.656  | 6.413 | 5.998 | 0.600 | 0.606 |
| 1.985  | 1.559 | 1.342  | 1.858 | 1.338 | 0.413 | 0.606 |
| 5.339  | 5.358 | 5.004  | 5.107 | 6.656 | 0.522 | 0.606 |
| 2.640  | 2.800 | 2.501  | 3.110 | 3.458 | 0.595 | 0.606 |
| 4.639  | 4.274 | 3.393  | 5.671 | 4.527 | 0.733 | 0.606 |
| 3.379  | 3.513 | 3.411  | 2.897 | 3.468 | 0.553 | 0.606 |
| 2.713  | 2.027 | 2.049  | 3.915 | 3.470 | 0.542 | 0.606 |
| 3.281  | 3.597 | 3.374  | 3.310 | 3.788 | 0.528 | 0.606 |
| 3.870  | 3.883 | 3.246  | 4.347 | 4.453 | 0.429 | 0.606 |
| 4.947  | 4.563 | 4.009  | 3.548 | 4.799 | 0.480 | 0.606 |
| 4.322  | 4.703 | 4.330  | 5.099 | 5.463 | 0.472 | 0.606 |
| 1.003  | 6.805 | 5.320  | 7.164 | 7.111 | 1.343 | 0.606 |
| 3.325  | 3.116 | 3.521  | 3.109 | 2.918 | 0.548 | 0.606 |
| 7.143  | 6.346 | 8.146  | 6.507 | 6.229 | 0.449 | 0.606 |
| 6.145  | 5.641 | 6.733  | 5.671 | 5.392 | 0.463 | 0.606 |
| 3.574  | 2.537 | 3.035  | 3.255 | 2.933 | 0.497 | 0.606 |
| 3.733  | 3.393 | 3.087  | 4.014 | 3.339 | 0.495 | 0.606 |

|        |        |        |        |        |       |       |
|--------|--------|--------|--------|--------|-------|-------|
| 3.138  | 3.162  | 2.851  | 3.159  | 3.583  | 0.437 | 0.606 |
| 2.969  | 5.635  | 5.272  | 3.070  | 4.724  | 0.930 | 0.606 |
| 2.787  | 1.023  | 1.718  | 1.818  | 1.510  | 0.819 | 0.606 |
| 3.480  | 4.780  | 1.866  | 5.180  | 4.967  | 0.651 | 0.606 |
| 4.316  | 4.689  | 4.258  | 4.917  | 4.558  | 0.452 | 0.606 |
| 4.324  | 3.646  | 4.085  | 3.394  | 3.726  | 0.521 | 0.606 |
| 3.437  | 3.097  | 3.728  | 3.230  | 4.462  | 0.509 | 0.606 |
| 2.527  | 5.120  | 1.458  | 5.926  | 5.507  | 1.001 | 0.606 |
| 3.539  | 2.521  | 4.221  | 3.777  | 2.485  | 0.460 | 0.606 |
| 3.235  | 2.483  | 4.698  | 2.879  | 2.719  | 0.486 | 0.606 |
| 5.903  | 4.277  | 6.654  | 3.784  | 4.092  | 0.640 | 0.606 |
| 2.342  | 3.556  | 3.354  | 2.456  | 2.480  | 0.448 | 0.606 |
| 3.387  | 2.491  | 3.003  | 1.892  | 2.670  | 0.598 | 0.606 |
| 3.364  | 2.796  | 2.080  | 3.360  | 2.725  | 0.456 | 0.606 |
| 4.616  | 7.177  | 4.268  | 6.367  | 5.760  | 0.690 | 0.606 |
| 4.389  | 3.227  | 3.386  | 2.494  | 2.352  | 0.705 | 0.606 |
| 5.217  | 3.738  | 4.097  | 3.635  | 3.657  | 0.479 | 0.606 |
| 5.067  | 7.803  | 2.142  | 8.308  | 8.013  | 1.302 | 0.606 |
| 6.915  | 8.166  | 5.312  | 8.683  | 8.203  | 0.715 | 0.606 |
| 3.912  | 4.335  | 3.659  | 4.523  | 4.111  | 0.314 | 0.606 |
| 7.417  | 7.317  | 5.687  | 7.893  | 7.623  | 0.458 | 0.606 |
| 3.992  | 3.921  | 3.271  | 4.974  | 4.463  | 0.439 | 0.606 |
| 1.899  | 2.578  | 1.976  | 2.183  | 2.492  | 0.475 | 0.606 |
| 8.314  | 7.226  | 8.978  | 6.974  | 7.396  | 0.481 | 0.606 |
| 6.256  | 5.113  | 4.309  | 5.905  | 7.354  | 0.814 | 0.606 |
| 6.240  | 5.993  | 4.855  | 6.377  | 6.076  | 0.501 | 0.606 |
| 4.175  | 4.982  | 4.514  | 4.391  | 5.028  | 0.334 | 0.606 |
| 3.861  | 4.423  | 4.389  | 4.006  | 3.888  | 0.445 | 0.606 |
| 4.639  | 4.827  | 1.899  | 5.211  | 5.767  | 0.711 | 0.606 |
| 6.366  | 5.910  | 6.304  | 6.472  | 6.432  | 0.465 | 0.606 |
| 10.713 | 10.738 | 11.443 | 10.123 | 10.782 | 0.336 | 0.606 |
| 5.174  | 4.965  | 5.096  | 4.785  | 5.253  | 0.487 | 0.606 |
| 5.163  | 4.795  | 5.353  | 4.211  | 4.711  | 0.425 | 0.606 |
| 2.394  | 2.366  | 2.524  | 2.139  | 1.865  | 0.406 | 0.606 |
| 2.559  | 3.429  | 1.974  | 2.191  | 3.112  | 0.411 | 0.606 |
| 5.410  | 5.782  | 5.831  | 5.334  | 6.294  | 0.397 | 0.606 |
| 3.834  | 4.082  | 4.589  | 3.093  | 4.009  | 0.422 | 0.606 |
| 6.644  | 6.449  | 6.568  | 6.037  | 6.556  | 0.346 | 0.606 |
| 3.781  | 2.856  | 4.293  | 3.627  | 3.067  | 0.500 | 0.606 |
| 4.657  | 4.119  | 4.914  | 4.064  | 4.044  | 0.445 | 0.606 |
| 5.280  | 6.622  | 5.071  | 6.566  | 6.482  | 0.617 | 0.606 |
| 4.909  | 5.089  | 6.056  | 3.470  | 4.072  | 0.663 | 0.606 |
| 6.061  | 5.613  | 6.094  | 5.063  | 5.170  | 0.361 | 0.606 |
| 2.159  | 2.285  | 2.540  | 2.334  | 2.456  | 0.448 | 0.606 |
| 6.462  | 7.397  | 5.627  | 8.168  | 8.099  | 0.531 | 0.606 |
| 4.719  | 5.231  | 4.597  | 4.840  | 5.052  | 0.483 | 0.606 |
| 3.573  | 3.798  | 4.923  | 3.250  | 3.126  | 0.411 | 0.606 |
| 3.954  | 2.660  | 3.007  | 3.086  | 3.849  | 0.621 | 0.606 |
| 4.062  | 3.300  | 4.618  | 4.366  | 4.457  | 0.656 | 0.606 |
| 4.955  | 4.839  | 5.804  | 5.443  | 5.580  | 0.405 | 0.606 |

|       |       |       |       |       |       |       |
|-------|-------|-------|-------|-------|-------|-------|
| 6.915 | 7.143 | 6.423 | 7.359 | 7.367 | 0.338 | 0.606 |
| 8.028 | 7.606 | 7.856 | 7.104 | 7.797 | 0.383 | 0.606 |
| 6.346 | 5.861 | 6.157 | 5.514 | 5.848 | 0.298 | 0.606 |
| 6.430 | 5.523 | 7.434 | 5.330 | 5.341 | 0.494 | 0.606 |
| 5.435 | 4.566 | 5.898 | 3.904 | 4.034 | 0.483 | 0.606 |
| 3.347 | 3.157 | 3.481 | 2.388 | 3.027 | 0.469 | 0.606 |
| 6.310 | 6.589 | 5.933 | 6.837 | 6.928 | 0.422 | 0.606 |
| 8.174 | 8.747 | 7.544 | 8.750 | 8.709 | 0.410 | 0.606 |
| 8.652 | 9.200 | 8.012 | 9.283 | 9.278 | 0.423 | 0.606 |
| 8.256 | 8.754 | 7.614 | 8.808 | 8.820 | 0.411 | 0.606 |
| 8.043 | 8.594 | 7.382 | 8.649 | 8.672 | 0.413 | 0.606 |
| 8.242 | 8.768 | 7.614 | 8.775 | 8.799 | 0.407 | 0.606 |
| 7.676 | 8.215 | 6.976 | 8.182 | 8.288 | 0.419 | 0.606 |
| 7.750 | 9.714 | 4.187 | 9.849 | 9.602 | 1.199 | 0.606 |
| 6.173 | 5.312 | 6.559 | 5.597 | 5.357 | 0.377 | 0.606 |
| 6.035 | 8.329 | 3.059 | 8.948 | 8.962 | 1.293 | 0.606 |
| 3.880 | 5.915 | 4.505 | 6.600 | 6.303 | 0.649 | 0.606 |
| 6.747 | 7.655 | 4.488 | 8.041 | 7.925 | 0.825 | 0.606 |
| 4.715 | 7.870 | 2.847 | 8.392 | 8.215 | 1.182 | 0.606 |
| 4.055 | 7.011 | 2.446 | 7.262 | 6.678 | 1.027 | 0.606 |
| 5.859 | 7.070 | 5.695 | 7.352 | 7.369 | 0.510 | 0.606 |
| 4.753 | 8.113 | 2.489 | 8.378 | 8.475 | 1.258 | 0.606 |
| 4.103 | 4.881 | 3.705 | 5.550 | 5.332 | 0.520 | 0.606 |
| 3.551 | 6.501 | 2.196 | 6.748 | 6.906 | 1.070 | 0.606 |
| 3.827 | 3.011 | 2.161 | 2.209 | 2.778 | 0.518 | 0.606 |
| 7.289 | 6.626 | 8.013 | 7.529 | 7.919 | 0.492 | 0.606 |
| 8.032 | 8.894 | 3.375 | 9.410 | 9.250 | 1.319 | 0.606 |
| 2.852 | 3.511 | 1.895 | 3.983 | 3.629 | 0.560 | 0.606 |
| 6.725 | 3.469 | 2.302 | 3.372 | 2.640 | 0.976 | 0.606 |
| 4.427 | 5.500 | 3.336 | 5.852 | 6.190 | 0.764 | 0.606 |
| 6.476 | 7.251 | 3.157 | 7.400 | 7.589 | 1.076 | 0.606 |
| 6.291 | 8.267 | 8.747 | 6.781 | 6.515 | 0.952 | 0.606 |
| 6.456 | 8.151 | 7.081 | 7.485 | 6.744 | 0.640 | 0.606 |
| 3.793 | 4.510 | 4.111 | 5.592 | 3.773 | 0.935 | 0.606 |
| 4.159 | 2.503 | 1.828 | 2.307 | 2.482 | 0.566 | 0.606 |
| 3.205 | 3.627 | 3.575 | 2.690 | 2.882 | 0.533 | 0.606 |
| 3.645 | 4.464 | 3.179 | 4.176 | 4.089 | 0.379 | 0.606 |
| 2.375 | 2.426 | 2.496 | 1.887 | 2.401 | 0.461 | 0.606 |
| 2.675 | 3.313 | 2.751 | 3.564 | 3.488 | 0.449 | 0.606 |
| 5.712 | 6.248 | 4.978 | 6.573 | 6.484 | 0.411 | 0.606 |
| 1.927 | 2.649 | 1.048 | 2.873 | 2.879 | 0.448 | 0.606 |
| 7.099 | 7.340 | 7.670 | 4.461 | 5.884 | 0.738 | 0.606 |
| 5.484 | 5.659 | 3.377 | 5.359 | 5.080 | 0.548 | 0.606 |
| 4.279 | 5.410 | 4.509 | 5.554 | 5.253 | 0.466 | 0.606 |
| 2.890 | 2.824 | 4.195 | 2.694 | 3.147 | 0.434 | 0.606 |
| 5.900 | 4.812 | 4.915 | 3.427 | 3.855 | 0.592 | 0.606 |
| 5.710 | 4.932 | 6.180 | 4.584 | 4.859 | 0.430 | 0.606 |
| 5.444 | 6.422 | 3.443 | 6.726 | 6.337 | 0.756 | 0.606 |
| 2.339 | 3.436 | 1.192 | 3.405 | 3.935 | 0.649 | 0.606 |
| 2.119 | 2.480 | 2.891 | 2.603 | 2.639 | 0.427 | 0.606 |

|        |        |        |       |       |       |       |
|--------|--------|--------|-------|-------|-------|-------|
| 5.729  | 4.588  | 6.199  | 4.703 | 5.142 | 0.443 | 0.606 |
| 3.542  | 3.191  | 4.319  | 2.536 | 2.770 | 0.636 | 0.606 |
| 7.439  | 8.403  | 5.304  | 8.661 | 8.247 | 0.771 | 0.606 |
| 3.528  | 1.917  | 3.672  | 2.053 | 2.604 | 0.727 | 0.606 |
| 5.478  | 3.953  | 4.486  | 5.044 | 4.481 | 0.588 | 0.606 |
| 5.677  | 5.831  | 5.617  | 6.018 | 5.823 | 0.313 | 0.606 |
| 5.963  | 6.501  | 5.899  | 7.064 | 6.732 | 0.450 | 0.606 |
| 2.412  | 2.754  | 2.381  | 2.846 | 2.835 | 0.587 | 0.606 |
| 4.671  | 4.086  | 4.981  | 4.127 | 4.107 | 0.404 | 0.606 |
| 3.149  | 2.923  | 2.849  | 2.780 | 2.356 | 0.520 | 0.606 |
| 2.232  | 2.296  | 2.444  | 1.461 | 1.649 | 0.424 | 0.606 |
| 3.689  | 4.437  | 2.681  | 4.342 | 4.332 | 0.550 | 0.606 |
| 7.192  | 8.293  | 8.166  | 8.322 | 8.239 | 0.386 | 0.606 |
| 6.748  | 6.446  | 5.847  | 6.636 | 6.563 | 0.346 | 0.606 |
| 5.737  | 5.194  | 4.973  | 4.619 | 5.172 | 0.449 | 0.606 |
| 2.813  | 3.378  | 3.564  | 2.044 | 2.403 | 0.616 | 0.606 |
| 4.336  | 5.599  | 4.204  | 3.429 | 4.799 | 0.807 | 0.606 |
| 3.765  | 4.689  | 2.296  | 2.502 | 3.494 | 0.941 | 0.606 |
| 4.380  | 4.736  | 4.282  | 4.457 | 4.590 | 0.575 | 0.606 |
| 3.588  | 4.173  | 3.245  | 2.981 | 5.939 | 0.793 | 0.606 |
| 3.053  | 2.409  | 2.004  | 2.367 | 2.772 | 0.410 | 0.606 |
| 5.788  | 5.721  | 6.628  | 4.999 | 5.533 | 0.514 | 0.606 |
| 7.455  | 7.602  | 7.258  | 7.938 | 8.038 | 0.323 | 0.606 |
| 4.924  | 5.109  | 4.792  | 4.855 | 5.231 | 0.425 | 0.606 |
| 3.198  | 3.267  | 2.328  | 3.756 | 3.431 | 0.409 | 0.606 |
| 1.999  | 4.234  | 1.873  | 4.570 | 4.891 | 0.760 | 0.606 |
| 3.112  | 3.534  | 2.919  | 3.625 | 4.039 | 0.357 | 0.606 |
| 6.272  | 6.595  | 6.399  | 7.459 | 6.851 | 0.424 | 0.606 |
| 2.832  | 8.341  | 3.981  | 8.532 | 8.586 | 1.497 | 0.606 |
| 6.825  | 6.950  | 6.063  | 7.507 | 7.547 | 0.433 | 0.606 |
| 3.688  | 4.944  | 2.098  | 4.972 | 5.319 | 0.676 | 0.606 |
| 6.524  | 6.145  | 6.272  | 6.420 | 6.785 | 0.396 | 0.606 |
| 7.015  | 6.944  | 7.159  | 6.316 | 6.329 | 0.348 | 0.606 |
| 3.651  | 4.624  | 4.862  | 5.072 | 4.594 | 0.393 | 0.606 |
| 6.383  | 5.666  | 5.961  | 6.131 | 5.971 | 0.431 | 0.606 |
| 3.093  | 2.330  | 2.548  | 2.013 | 2.214 | 0.568 | 0.606 |
| 1.597  | 2.835  | 1.681  | 3.090 | 3.082 | 0.546 | 0.606 |
| 6.489  | 6.730  | 5.834  | 6.769 | 6.868 | 0.436 | 0.606 |
| 5.193  | 4.495  | 5.367  | 4.146 | 4.773 | 0.390 | 0.606 |
| 1.876  | 2.007  | 2.170  | 2.305 | 1.986 | 0.477 | 0.606 |
| 3.890  | 3.155  | 4.162  | 2.370 | 2.722 | 0.505 | 0.606 |
| 4.200  | 4.025  | 3.994  | 4.368 | 4.679 | 0.441 | 0.606 |
| 5.088  | 4.556  | 5.554  | 3.550 | 4.749 | 0.428 | 0.606 |
| 2.080  | 3.105  | 1.472  | 2.664 | 2.090 | 0.416 | 0.606 |
| 3.810  | 3.354  | 3.066  | 3.045 | 3.524 | 0.462 | 0.606 |
| 11.010 | 10.574 | 10.849 | 8.892 | 8.901 | 0.577 | 0.606 |
| 5.976  | 5.699  | 5.835  | 6.058 | 5.968 | 0.339 | 0.606 |
| 3.722  | 4.991  | 3.149  | 5.799 | 5.423 | 0.641 | 0.606 |
| 1.938  | 3.256  | 1.976  | 3.776 | 3.020 | 0.508 | 0.606 |
| 3.759  | 4.738  | 2.886  | 5.234 | 4.899 | 0.546 | 0.606 |

|       |       |       |       |       |       |       |
|-------|-------|-------|-------|-------|-------|-------|
| 3.797 | 5.138 | 4.252 | 4.882 | 4.924 | 0.561 | 0.606 |
| 5.622 | 5.158 | 5.174 | 5.299 | 5.167 | 0.487 | 0.606 |
| 3.187 | 5.132 | 1.846 | 5.558 | 5.540 | 0.841 | 0.606 |
| 5.983 | 6.101 | 5.235 | 6.152 | 5.957 | 0.344 | 0.606 |
| 4.210 | 5.092 | 3.634 | 5.478 | 4.760 | 0.427 | 0.606 |
| 3.733 | 3.676 | 2.817 | 3.369 | 3.622 | 0.340 | 0.606 |
| 3.030 | 1.678 | 3.396 | 2.072 | 2.223 | 0.494 | 0.606 |
| 3.939 | 3.833 | 3.800 | 2.248 | 3.798 | 0.671 | 0.606 |
| 1.904 | 2.185 | 2.631 | 2.380 | 3.701 | 0.496 | 0.606 |
| 8.628 | 9.093 | 8.058 | 9.143 | 9.379 | 0.369 | 0.606 |
| 2.244 | 2.542 | 1.668 | 2.510 | 2.538 | 0.432 | 0.606 |
| 3.298 | 2.914 | 4.040 | 3.311 | 3.689 | 0.376 | 0.606 |
| 4.528 | 4.770 | 5.058 | 4.048 | 4.751 | 0.467 | 0.606 |
| 3.763 | 3.377 | 3.809 | 2.698 | 3.902 | 0.461 | 0.606 |
| 4.125 | 4.649 | 4.557 | 3.738 | 5.175 | 0.548 | 0.606 |
| 3.742 | 3.995 | 4.334 | 2.670 | 3.473 | 0.541 | 0.606 |
| 4.475 | 4.170 | 4.175 | 3.294 | 4.029 | 0.419 | 0.606 |
| 3.225 | 2.605 | 3.961 | 3.554 | 2.397 | 0.578 | 0.606 |
| 6.737 | 7.257 | 7.085 | 7.836 | 7.166 | 0.404 | 0.606 |
| 8.748 | 8.466 | 9.007 | 8.424 | 9.042 | 0.555 | 0.606 |
| 2.752 | 3.218 | 3.199 | 1.895 | 2.381 | 0.493 | 0.606 |
| 4.687 | 3.149 | 5.041 | 1.993 | 2.758 | 0.766 | 0.606 |
| 3.000 | 2.644 | 2.188 | 3.161 | 4.856 | 0.799 | 0.606 |
| 4.990 | 4.812 | 1.468 | 5.262 | 6.024 | 0.988 | 0.606 |
| 3.546 | 3.944 | 2.487 | 4.157 | 4.219 | 0.519 | 0.606 |
| 5.312 | 5.169 | 6.059 | 3.893 | 3.829 | 0.574 | 0.606 |
| 2.344 | 1.758 | 2.592 | 2.019 | 2.603 | 0.734 | 0.606 |
| 3.902 | 3.836 | 2.246 | 4.350 | 4.409 | 0.507 | 0.606 |
| 6.113 | 4.631 | 5.191 | 4.743 | 5.328 | 0.464 | 0.606 |
| 3.768 | 2.541 | 3.949 | 3.184 | 3.580 | 0.513 | 0.606 |
| 4.641 | 5.235 | 5.180 | 4.972 | 4.759 | 0.512 | 0.606 |
| 3.177 | 2.655 | 3.307 | 2.643 | 3.022 | 0.461 | 0.606 |
| 2.838 | 2.968 | 1.855 | 3.632 | 3.347 | 0.495 | 0.606 |
| 2.798 | 3.276 | 2.786 | 3.754 | 3.672 | 0.341 | 0.606 |
| 4.037 | 5.682 | 4.116 | 4.888 | 5.278 | 0.519 | 0.606 |
| 7.919 | 6.863 | 8.129 | 5.241 | 6.043 | 0.694 | 0.606 |
| 3.131 | 3.089 | 2.921 | 3.654 | 3.234 | 0.444 | 0.606 |
| 3.875 | 4.137 | 4.243 | 4.510 | 4.468 | 0.357 | 0.606 |
| 5.278 | 4.561 | 6.026 | 4.890 | 4.882 | 0.433 | 0.606 |
| 3.859 | 3.316 | 4.509 | 3.310 | 2.924 | 0.466 | 0.606 |
| 6.803 | 6.974 | 6.075 | 7.779 | 7.502 | 0.544 | 0.606 |
| 4.684 | 4.865 | 5.469 | 4.680 | 4.806 | 0.611 | 0.606 |
| 5.426 | 5.294 | 6.455 | 4.123 | 4.632 | 0.576 | 0.606 |
| 4.271 | 4.317 | 4.721 | 4.568 | 4.000 | 0.484 | 0.606 |
| 3.498 | 4.296 | 3.271 | 4.693 | 4.812 | 0.428 | 0.606 |
| 3.525 | 2.382 | 1.927 | 2.629 | 2.441 | 0.431 | 0.606 |
| 1.621 | 4.207 | 1.972 | 3.917 | 5.040 | 0.802 | 0.606 |
| 8.264 | 2.960 | 1.421 | 3.385 | 3.023 | 1.526 | 0.606 |
| 6.035 | 4.375 | 1.954 | 5.351 | 4.985 | 0.844 | 0.606 |
| 5.976 | 6.634 | 1.544 | 7.552 | 7.034 | 1.215 | 0.606 |

|       |        |       |        |        |       |       |
|-------|--------|-------|--------|--------|-------|-------|
| 5.558 | 6.094  | 3.131 | 6.588  | 6.549  | 0.845 | 0.606 |
| 3.841 | 5.009  | 4.504 | 4.961  | 4.670  | 0.627 | 0.606 |
| 4.561 | 4.588  | 4.241 | 5.099  | 5.456  | 0.368 | 0.606 |
| 6.676 | 7.671  | 5.672 | 8.000  | 7.678  | 0.519 | 0.606 |
| 5.752 | 6.547  | 3.294 | 6.230  | 6.410  | 0.809 | 0.606 |
| 5.743 | 5.531  | 3.837 | 6.411  | 6.426  | 0.630 | 0.606 |
| 9.078 | 7.540  | 9.707 | 7.061  | 7.053  | 0.622 | 0.606 |
| 6.852 | 6.600  | 6.895 | 6.384  | 6.717  | 0.315 | 0.606 |
| 6.098 | 5.201  | 6.669 | 5.117  | 5.513  | 0.473 | 0.606 |
| 2.218 | 3.094  | 1.987 | 2.625  | 3.607  | 0.434 | 0.606 |
| 8.116 | 8.675  | 8.553 | 7.844  | 7.146  | 0.524 | 0.606 |
| 3.181 | 2.096  | 2.355 | 2.674  | 3.033  | 0.737 | 0.606 |
| 6.103 | 5.874  | 6.543 | 5.400  | 5.509  | 0.365 | 0.606 |
| 5.912 | 6.772  | 6.726 | 4.799  | 6.125  | 0.718 | 0.606 |
| 4.196 | 4.245  | 4.234 | 3.456  | 3.787  | 0.510 | 0.606 |
| 5.688 | 3.857  | 4.278 | 3.619  | 3.949  | 0.624 | 0.606 |
| 6.819 | 7.107  | 6.728 | 7.450  | 7.431  | 0.324 | 0.606 |
| 4.985 | 4.926  | 5.239 | 4.475  | 4.242  | 0.356 | 0.606 |
| 5.914 | 5.818  | 6.983 | 5.563  | 5.882  | 0.402 | 0.606 |
| 5.013 | 4.773  | 4.462 | 5.555  | 5.223  | 0.550 | 0.606 |
| 3.040 | 4.048  | 3.444 | 3.242  | 4.103  | 0.606 | 0.606 |
| 4.252 | 4.735  | 4.728 | 3.788  | 4.316  | 0.375 | 0.606 |
| 3.386 | 2.868  | 3.306 | 3.808  | 2.972  | 0.393 | 0.606 |
| 4.479 | 5.051  | 2.194 | 5.327  | 5.536  | 0.684 | 0.606 |
| 9.935 | 10.506 | 9.847 | 10.394 | 10.416 | 0.329 | 0.606 |
| 3.085 | 3.655  | 3.153 | 3.891  | 3.825  | 0.454 | 0.606 |
| 4.250 | 4.788  | 4.696 | 4.649  | 4.745  | 0.393 | 0.606 |
| 5.061 | 5.907  | 2.780 | 5.662  | 6.022  | 0.740 | 0.606 |
| 3.902 | 3.285  | 2.909 | 4.419  | 4.098  | 0.437 | 0.606 |
| 5.540 | 4.345  | 5.563 | 3.967  | 4.893  | 0.431 | 0.606 |
| 3.552 | 4.896  | 2.971 | 5.274  | 4.676  | 0.640 | 0.606 |
| 3.322 | 2.393  | 2.277 | 3.622  | 3.560  | 0.433 | 0.606 |
| 8.787 | 9.640  | 6.022 | 9.629  | 9.596  | 0.865 | 0.606 |
| 5.427 | 4.608  | 4.326 | 4.453  | 4.463  | 0.488 | 0.606 |
| 3.590 | 3.713  | 3.685 | 3.151  | 3.137  | 0.452 | 0.606 |
| 5.122 | 5.732  | 5.924 | 4.834  | 5.118  | 0.490 | 0.606 |
| 6.019 | 6.166  | 5.600 | 6.397  | 6.338  | 0.382 | 0.606 |
| 2.835 | 2.613  | 2.964 | 2.169  | 2.187  | 0.510 | 0.606 |
| 4.956 | 5.487  | 4.842 | 6.120  | 6.092  | 0.426 | 0.606 |
| 4.355 | 4.763  | 4.532 | 5.449  | 4.904  | 0.359 | 0.606 |
| 5.539 | 5.673  | 5.121 | 6.138  | 6.324  | 0.350 | 0.606 |
| 2.907 | 3.766  | 2.964 | 3.633  | 3.756  | 0.399 | 0.606 |
| 2.267 | 2.341  | 1.671 | 3.336  | 3.070  | 0.550 | 0.606 |
| 3.308 | 3.700  | 3.367 | 2.362  | 3.151  | 0.480 | 0.606 |
| 2.085 | 1.560  | 1.574 | 2.238  | 1.933  | 0.487 | 0.606 |
| 2.206 | 3.341  | 3.607 | 4.143  | 4.058  | 0.728 | 0.606 |
| 5.965 | 5.013  | 5.423 | 5.329  | 5.268  | 0.390 | 0.606 |
| 5.837 | 4.754  | 5.187 | 5.045  | 5.029  | 0.404 | 0.606 |
| 4.651 | 4.780  | 3.721 | 4.999  | 4.560  | 0.539 | 0.606 |
| 1.953 | 3.416  | 2.024 | 3.512  | 2.443  | 0.591 | 0.606 |

|       |       |       |       |       |       |       |
|-------|-------|-------|-------|-------|-------|-------|
| 7.386 | 7.080 | 6.881 | 6.977 | 7.183 | 0.377 | 0.606 |
| 7.457 | 7.053 | 6.936 | 6.978 | 7.197 | 0.385 | 0.606 |
| 4.779 | 2.722 | 3.585 | 3.137 | 3.527 | 0.445 | 0.606 |
| 3.520 | 3.091 | 2.981 | 3.231 | 2.063 | 0.510 | 0.606 |
| 3.504 | 3.166 | 3.092 | 3.126 | 1.839 | 0.574 | 0.606 |
| 6.003 | 4.841 | 5.597 | 5.175 | 4.594 | 0.391 | 0.606 |
| 7.115 | 5.505 | 6.652 | 5.713 | 5.757 | 0.436 | 0.606 |
| 6.539 | 5.255 | 6.223 | 5.409 | 5.124 | 0.393 | 0.606 |
| 6.719 | 5.195 | 6.537 | 5.563 | 5.538 | 0.405 | 0.606 |
| 4.140 | 3.468 | 3.574 | 3.077 | 2.461 | 0.589 | 0.606 |
| 7.900 | 7.556 | 8.221 | 7.285 | 7.724 | 0.344 | 0.606 |
| 5.751 | 6.164 | 6.610 | 6.671 | 6.917 | 0.377 | 0.606 |
| 7.256 | 7.309 | 7.604 | 7.974 | 7.708 | 0.346 | 0.606 |
| 3.580 | 4.030 | 3.941 | 3.724 | 3.681 | 0.421 | 0.606 |
| 9.107 | 9.311 | 7.586 | 9.434 | 9.235 | 0.524 | 0.606 |
| 7.997 | 8.186 | 7.508 | 8.295 | 8.356 | 0.312 | 0.606 |
| 5.620 | 5.016 | 5.274 | 5.611 | 6.071 | 0.393 | 0.606 |
| 6.000 | 6.392 | 6.253 | 6.754 | 6.705 | 0.343 | 0.606 |
| 4.918 | 5.285 | 5.251 | 5.348 | 5.979 | 0.329 | 0.606 |
| 5.294 | 5.254 | 5.596 | 5.906 | 5.838 | 0.366 | 0.606 |
| 3.703 | 3.872 | 3.531 | 4.139 | 4.584 | 0.431 | 0.606 |
| 2.402 | 1.962 | 2.361 | 1.936 | 1.504 | 0.384 | 0.606 |
| 2.394 | 2.328 | 1.800 | 2.041 | 2.378 | 0.540 | 0.606 |
| 4.928 | 4.708 | 5.479 | 5.258 | 5.025 | 0.356 | 0.606 |
| 6.179 | 5.668 | 5.397 | 5.537 | 5.822 | 0.428 | 0.606 |
| 5.324 | 5.395 | 5.945 | 5.461 | 5.467 | 0.465 | 0.606 |
| 6.416 | 6.721 | 6.441 | 6.393 | 7.185 | 0.435 | 0.606 |
| 4.561 | 2.841 | 3.486 | 2.696 | 2.844 | 0.687 | 0.606 |
| 6.600 | 7.477 | 6.111 | 7.754 | 7.395 | 0.409 | 0.606 |
| 8.787 | 9.096 | 7.439 | 9.307 | 9.140 | 0.446 | 0.606 |
| 6.086 | 5.112 | 7.450 | 3.722 | 3.396 | 0.869 | 0.606 |
| 5.134 | 4.740 | 3.725 | 5.419 | 5.252 | 0.519 | 0.606 |
| 4.348 | 5.229 | 3.819 | 4.724 | 4.699 | 0.726 | 0.606 |
| 3.621 | 3.010 | 2.694 | 2.998 | 2.176 | 0.445 | 0.606 |
| 4.295 | 3.435 | 3.745 | 3.487 | 3.294 | 0.352 | 0.606 |
| 5.859 | 5.670 | 5.896 | 6.161 | 6.382 | 0.325 | 0.606 |
| 3.884 | 5.819 | 3.231 | 5.976 | 5.810 | 0.703 | 0.606 |
| 3.063 | 3.828 | 2.799 | 3.727 | 3.596 | 0.410 | 0.606 |
| 6.541 | 5.600 | 6.515 | 6.029 | 6.131 | 0.425 | 0.606 |
| 2.932 | 3.139 | 2.492 | 3.235 | 3.061 | 0.489 | 0.606 |
| 2.716 | 2.436 | 2.731 | 1.856 | 2.309 | 0.459 | 0.606 |
| 2.926 | 2.978 | 2.985 | 2.672 | 2.257 | 0.427 | 0.606 |
| 5.842 | 6.069 | 5.903 | 6.086 | 6.057 | 0.385 | 0.606 |
| 2.741 | 2.272 | 2.589 | 1.874 | 2.187 | 0.364 | 0.606 |
| 2.122 | 2.809 | 2.245 | 2.313 | 2.840 | 0.526 | 0.606 |
| 3.576 | 2.275 | 1.369 | 2.716 | 3.307 | 0.594 | 0.606 |
| 1.543 | 2.818 | 2.049 | 2.993 | 3.432 | 0.467 | 0.606 |
| 3.721 | 3.702 | 2.956 | 5.159 | 4.526 | 0.605 | 0.606 |
| 6.315 | 7.131 | 5.392 | 7.258 | 7.261 | 0.510 | 0.606 |
| 7.749 | 8.338 | 5.608 | 8.675 | 8.369 | 0.657 | 0.606 |



|        |       |        |       |       |       |       |
|--------|-------|--------|-------|-------|-------|-------|
| 5.787  | 6.798 | 4.324  | 7.039 | 6.712 | 0.657 | 0.606 |
| 3.349  | 2.711 | 4.233  | 3.925 | 3.166 | 0.621 | 0.606 |
| 3.479  | 3.119 | 2.639  | 3.398 | 3.368 | 0.473 | 0.606 |
| 3.055  | 3.636 | 2.758  | 3.615 | 3.480 | 0.369 | 0.606 |
| 6.020  | 5.966 | 6.309  | 6.261 | 6.254 | 0.412 | 0.606 |
| 4.516  | 6.173 | 5.964  | 3.587 | 4.044 | 0.855 | 0.606 |
| 2.182  | 3.722 | 3.020  | 3.373 | 3.152 | 0.507 | 0.606 |
| 5.041  | 6.417 | 4.630  | 7.520 | 6.726 | 0.658 | 0.606 |
| 4.096  | 6.069 | 1.873  | 6.781 | 6.823 | 1.177 | 0.606 |
| 4.077  | 5.998 | 1.753  | 6.514 | 5.752 | 0.882 | 0.606 |
| 4.153  | 3.973 | 3.097  | 3.990 | 3.852 | 0.507 | 0.606 |
| 6.104  | 5.430 | 6.412  | 4.373 | 5.199 | 0.667 | 0.606 |
| 9.489  | 8.430 | 10.523 | 7.267 | 7.830 | 0.701 | 0.606 |
| 7.116  | 6.721 | 6.664  | 6.421 | 6.804 | 0.510 | 0.606 |
| 4.155  | 4.703 | 4.510  | 3.440 | 4.164 | 0.556 | 0.606 |
| 2.779  | 3.549 | 1.943  | 2.375 | 3.129 | 0.440 | 0.606 |
| 3.671  | 4.415 | 3.407  | 5.073 | 4.336 | 0.445 | 0.606 |
| 7.320  | 8.133 | 7.815  | 7.122 | 7.308 | 0.371 | 0.606 |
| 2.892  | 4.267 | 3.480  | 4.611 | 3.622 | 0.477 | 0.606 |
| 3.026  | 3.473 | 2.174  | 4.234 | 4.270 | 0.521 | 0.606 |
| 4.007  | 3.091 | 4.918  | 2.235 | 2.553 | 0.588 | 0.606 |
| 2.870  | 4.896 | 1.719  | 5.562 | 5.168 | 0.801 | 0.606 |
| 3.720  | 4.255 | 5.042  | 3.270 | 3.477 | 0.606 | 0.606 |
| 3.986  | 5.949 | 2.000  | 6.530 | 5.914 | 0.924 | 0.606 |
| 4.412  | 4.425 | 3.108  | 5.261 | 5.230 | 0.631 | 0.606 |
| 3.781  | 4.181 | 4.501  | 4.664 | 4.542 | 0.510 | 0.606 |
| 3.896  | 6.328 | 6.245  | 7.134 | 6.719 | 0.846 | 0.606 |
| 6.283  | 6.910 | 5.329  | 6.741 | 6.683 | 0.442 | 0.606 |
| 5.073  | 5.663 | 4.449  | 5.246 | 5.612 | 0.484 | 0.606 |
| 1.865  | 2.431 | 2.117  | 2.008 | 1.876 | 0.587 | 0.606 |
| 10.155 | 9.587 | 10.730 | 9.128 | 9.380 | 0.412 | 0.606 |
| 4.235  | 5.337 | 3.343  | 6.129 | 5.874 | 0.646 | 0.606 |
| 6.896  | 6.285 | 7.712  | 6.134 | 6.195 | 0.403 | 0.606 |
| 3.092  | 2.762 | 3.152  | 2.369 | 2.809 | 0.450 | 0.606 |
| 5.646  | 6.131 | 6.124  | 5.331 | 5.769 | 0.367 | 0.606 |
| 4.993  | 4.611 | 4.940  | 4.313 | 4.419 | 0.375 | 0.606 |
| 4.149  | 3.724 | 2.351  | 3.370 | 4.270 | 0.681 | 0.606 |
| 1.603  | 1.910 | 1.707  | 2.049 | 2.273 | 0.551 | 0.606 |
| 6.784  | 7.426 | 5.049  | 7.624 | 7.475 | 0.565 | 0.606 |
| 5.324  | 4.747 | 5.915  | 5.270 | 5.580 | 0.481 | 0.606 |
| 2.967  | 2.830 | 3.229  | 2.430 | 3.499 | 0.680 | 0.606 |
| 3.677  | 3.742 | 3.295  | 4.337 | 3.742 | 0.428 | 0.606 |
| 2.669  | 4.849 | 2.390  | 4.848 | 4.617 | 0.642 | 0.606 |
| 4.958  | 4.151 | 4.708  | 3.244 | 3.470 | 0.529 | 0.606 |
| 6.104  | 6.979 | 8.122  | 5.685 | 5.968 | 0.598 | 0.606 |
| 4.708  | 4.456 | 2.329  | 5.030 | 4.549 | 0.608 | 0.606 |
| 2.005  | 1.716 | 1.278  | 2.937 | 3.353 | 0.509 | 0.606 |
| 2.634  | 2.727 | 1.431  | 1.992 | 1.860 | 0.873 | 0.606 |
| 5.600  | 6.059 | 3.093  | 6.869 | 6.699 | 0.768 | 0.606 |
| 6.536  | 7.975 | 6.954  | 8.445 | 8.309 | 0.517 | 0.606 |

|       |       |       |       |       |       |       |
|-------|-------|-------|-------|-------|-------|-------|
| 6.535 | 7.269 | 6.320 | 7.952 | 8.010 | 0.471 | 0.606 |
| 7.575 | 7.367 | 6.769 | 7.892 | 7.835 | 0.370 | 0.606 |
| 5.255 | 4.536 | 4.336 | 4.894 | 4.980 | 0.399 | 0.606 |
| 5.202 | 5.839 | 3.576 | 6.184 | 6.526 | 0.677 | 0.606 |
| 6.502 | 6.612 | 4.989 | 7.485 | 7.096 | 0.617 | 0.606 |
| 5.549 | 5.953 | 4.781 | 5.714 | 5.597 | 0.397 | 0.606 |
| 5.944 | 6.686 | 4.748 | 6.702 | 6.390 | 0.431 | 0.606 |
| 7.782 | 8.780 | 2.432 | 9.030 | 8.881 | 1.350 | 0.606 |
| 4.887 | 7.773 | 3.110 | 7.988 | 7.768 | 0.972 | 0.606 |
| 5.953 | 8.437 | 3.821 | 9.076 | 8.652 | 1.134 | 0.606 |
| 4.813 | 5.218 | 3.354 | 5.256 | 5.633 | 0.490 | 0.606 |
| 4.875 | 4.656 | 3.372 | 5.166 | 5.473 | 0.456 | 0.606 |
| 3.554 | 3.434 | 2.558 | 4.339 | 3.827 | 0.457 | 0.606 |
| 6.795 | 6.514 | 6.244 | 6.985 | 6.962 | 0.322 | 0.606 |
| 4.759 | 6.036 | 2.890 | 6.239 | 6.136 | 0.701 | 0.606 |
| 1.681 | 3.615 | 1.931 | 4.806 | 4.064 | 0.720 | 0.606 |
| 8.222 | 8.366 | 9.332 | 7.851 | 8.195 | 0.417 | 0.606 |
| 6.184 | 8.213 | 4.958 | 8.858 | 8.287 | 0.883 | 0.606 |
| 3.822 | 3.797 | 1.753 | 4.487 | 4.291 | 0.566 | 0.606 |
| 2.578 | 2.418 | 2.451 | 3.165 | 2.782 | 0.380 | 0.606 |
| 6.842 | 6.724 | 6.787 | 6.130 | 6.307 | 0.454 | 0.606 |
| 5.577 | 5.823 | 4.979 | 6.428 | 6.033 | 0.487 | 0.606 |
| 3.582 | 4.492 | 2.182 | 5.292 | 4.788 | 0.668 | 0.606 |
| 1.652 | 1.515 | 2.069 | 2.162 | 1.727 | 0.343 | 0.606 |
| 3.321 | 2.471 | 3.282 | 3.132 | 2.688 | 0.468 | 0.606 |
| 2.938 | 2.957 | 2.935 | 2.430 | 2.379 | 0.556 | 0.606 |
| 1.926 | 1.994 | 1.933 | 2.834 | 1.481 | 0.425 | 0.606 |
| 1.478 | 2.874 | 1.843 | 2.983 | 2.762 | 0.493 | 0.606 |
| 2.368 | 2.306 | 2.693 | 2.621 | 3.387 | 0.376 | 0.606 |
| 6.597 | 6.914 | 6.360 | 7.192 | 6.863 | 0.374 | 0.606 |
| 4.388 | 4.873 | 4.439 | 5.160 | 5.088 | 0.335 | 0.606 |
| 6.644 | 5.859 | 6.860 | 4.774 | 4.972 | 0.534 | 0.606 |
| 3.946 | 3.766 | 3.783 | 3.473 | 4.294 | 0.374 | 0.606 |
| 6.768 | 6.907 | 6.342 | 6.894 | 7.041 | 0.363 | 0.606 |
| 5.124 | 4.203 | 5.166 | 4.793 | 4.845 | 0.509 | 0.606 |
| 2.421 | 2.358 | 2.406 | 2.251 | 1.713 | 0.486 | 0.606 |
| 4.802 | 5.359 | 4.012 | 5.507 | 5.565 | 0.478 | 0.606 |
| 3.912 | 4.098 | 3.327 | 4.506 | 4.196 | 0.418 | 0.606 |
| 5.566 | 4.244 | 7.014 | 4.623 | 4.013 | 0.896 | 0.606 |
| 2.536 | 2.628 | 5.305 | 5.736 | 6.121 | 1.034 | 0.606 |
| 4.759 | 5.395 | 3.821 | 4.641 | 3.775 | 1.092 | 0.606 |
| 4.875 | 5.182 | 4.200 | 4.290 | 4.252 | 0.829 | 0.606 |
| 5.700 | 5.754 | 5.913 | 6.430 | 6.015 | 0.300 | 0.606 |
| 6.075 | 6.458 | 6.933 | 6.219 | 6.464 | 0.415 | 0.606 |
| 5.334 | 4.597 | 5.824 | 4.420 | 4.870 | 0.414 | 0.606 |
| 5.727 | 6.242 | 6.352 | 6.081 | 6.255 | 0.358 | 0.606 |
| 5.524 | 6.013 | 5.524 | 6.182 | 6.183 | 0.329 | 0.606 |
| 3.673 | 3.046 | 4.493 | 3.507 | 3.516 | 0.465 | 0.606 |
| 1.630 | 1.466 | 2.145 | 2.043 | 1.695 | 0.485 | 0.606 |
| 5.996 | 6.407 | 3.983 | 6.977 | 6.807 | 0.719 | 0.606 |

|       |       |       |       |       |       |       |
|-------|-------|-------|-------|-------|-------|-------|
| 6.541 | 6.739 | 6.581 | 7.372 | 7.071 | 0.440 | 0.606 |
| 8.433 | 9.241 | 7.073 | 9.559 | 9.483 | 0.593 | 0.606 |
| 5.951 | 6.438 | 6.430 | 6.367 | 6.595 | 0.438 | 0.606 |
| 3.941 | 4.163 | 2.816 | 5.410 | 4.760 | 0.567 | 0.606 |
| 5.247 | 4.826 | 5.283 | 3.951 | 4.535 | 0.410 | 0.606 |
| 6.132 | 5.323 | 5.943 | 5.519 | 5.423 | 0.448 | 0.606 |
| 1.805 | 2.716 | 2.571 | 1.799 | 1.562 | 0.478 | 0.606 |
| 4.718 | 4.328 | 5.442 | 3.179 | 4.243 | 0.604 | 0.606 |
| 4.937 | 4.119 | 6.156 | 4.121 | 4.521 | 0.627 | 0.606 |
| 7.765 | 7.689 | 8.645 | 6.753 | 6.853 | 0.483 | 0.606 |
| 7.416 | 7.234 | 8.357 | 6.363 | 6.431 | 0.493 | 0.606 |
| 4.851 | 4.409 | 4.735 | 3.532 | 4.473 | 0.532 | 0.606 |
| 3.782 | 4.260 | 3.420 | 4.902 | 4.205 | 0.395 | 0.606 |
| 8.714 | 8.381 | 9.440 | 7.679 | 7.723 | 0.488 | 0.606 |
| 2.900 | 2.711 | 1.860 | 2.680 | 3.289 | 0.441 | 0.606 |
| 5.048 | 4.815 | 5.468 | 4.416 | 4.838 | 0.453 | 0.606 |
| 5.344 | 4.050 | 4.778 | 3.475 | 4.042 | 0.624 | 0.606 |
| 1.789 | 2.444 | 2.491 | 1.642 | 2.126 | 0.410 | 0.606 |
| 4.904 | 5.141 | 4.985 | 4.477 | 4.385 | 0.402 | 0.606 |
| 2.866 | 2.858 | 2.760 | 3.191 | 2.663 | 0.553 | 0.606 |
| 3.943 | 4.835 | 5.302 | 3.300 | 4.256 | 0.496 | 0.606 |
| 5.316 | 5.807 | 6.565 | 5.390 | 5.370 | 0.364 | 0.606 |
| 4.565 | 5.271 | 4.586 | 5.204 | 5.300 | 0.359 | 0.606 |
| 8.397 | 9.370 | 9.476 | 7.879 | 8.278 | 0.479 | 0.606 |
| 3.095 | 3.314 | 3.428 | 2.399 | 3.344 | 0.427 | 0.606 |
| 2.663 | 2.625 | 2.877 | 2.442 | 1.844 | 0.452 | 0.606 |
| 5.942 | 6.357 | 6.131 | 6.255 | 6.611 | 0.317 | 0.606 |
| 7.485 | 6.583 | 7.631 | 6.682 | 6.939 | 0.356 | 0.606 |
| 3.282 | 2.470 | 3.968 | 1.820 | 2.148 | 0.511 | 0.606 |
| 6.648 | 9.098 | 7.810 | 5.551 | 6.523 | 1.086 | 0.606 |
| 4.734 | 5.096 | 2.290 | 3.458 | 3.871 | 0.698 | 0.606 |
| 8.329 | 6.852 | 9.053 | 4.873 | 5.217 | 0.911 | 0.606 |
| 5.495 | 6.307 | 1.414 | 6.676 | 6.312 | 1.114 | 0.606 |
| 2.208 | 2.931 | 2.152 | 3.254 | 2.871 | 0.410 | 0.606 |
| 2.788 | 3.758 | 1.485 | 3.861 | 4.125 | 0.602 | 0.606 |
| 3.805 | 4.192 | 4.949 | 4.126 | 4.396 | 0.387 | 0.606 |
| 3.282 | 3.028 | 3.207 | 3.094 | 2.463 | 0.394 | 0.606 |
| 3.650 | 3.876 | 4.336 | 3.582 | 3.813 | 0.386 | 0.606 |
| 5.136 | 5.428 | 5.872 | 4.106 | 4.573 | 0.561 | 0.606 |
| 2.127 | 2.016 | 2.475 | 1.754 | 2.060 | 0.470 | 0.606 |
| 5.263 | 4.412 | 5.822 | 4.024 | 3.831 | 0.488 | 0.606 |
| 2.771 | 2.337 | 2.353 | 2.370 | 2.770 | 0.422 | 0.606 |
| 2.648 | 2.624 | 2.298 | 2.935 | 2.873 | 0.481 | 0.606 |
| 3.651 | 2.748 | 2.809 | 2.935 | 2.597 | 0.415 | 0.606 |
| 5.629 | 6.140 | 5.505 | 6.809 | 6.794 | 0.459 | 0.606 |
| 4.126 | 4.161 | 3.454 | 4.105 | 4.852 | 0.373 | 0.606 |
| 3.965 | 3.820 | 4.197 | 4.711 | 3.968 | 0.551 | 0.606 |
| 3.000 | 2.217 | 2.898 | 1.721 | 1.779 | 0.424 | 0.606 |
| 3.800 | 1.734 | 3.395 | 2.096 | 1.837 | 0.586 | 0.606 |
| 4.171 | 1.664 | 3.805 | 2.405 | 1.985 | 0.618 | 0.606 |

|       |       |       |       |       |       |       |
|-------|-------|-------|-------|-------|-------|-------|
| 4.231 | 1.843 | 3.645 | 2.465 | 2.066 | 0.611 | 0.606 |
| 3.967 | 2.825 | 3.640 | 3.774 | 2.563 | 0.493 | 0.606 |
| 3.761 | 4.361 | 4.115 | 3.549 | 2.703 | 0.525 | 0.606 |
| 3.704 | 3.934 | 4.111 | 3.288 | 2.657 | 0.461 | 0.606 |
| 4.974 | 5.511 | 5.603 | 3.516 | 4.853 | 0.649 | 0.606 |
| 4.825 | 5.711 | 6.509 | 4.102 | 4.671 | 0.668 | 0.606 |
| 6.945 | 8.977 | 2.920 | 9.461 | 9.263 | 1.388 | 0.606 |
| 3.687 | 3.872 | 2.921 | 3.696 | 3.775 | 0.395 | 0.606 |
| 3.847 | 3.478 | 2.388 | 3.633 | 4.094 | 0.561 | 0.606 |
| 3.877 | 4.102 | 2.999 | 3.006 | 3.842 | 0.461 | 0.606 |
| 3.821 | 3.809 | 2.946 | 2.142 | 3.854 | 0.506 | 0.606 |
| 4.740 | 4.337 | 4.256 | 3.439 | 4.476 | 0.478 | 0.606 |
| 3.647 | 3.258 | 2.667 | 4.154 | 3.637 | 0.470 | 0.606 |
| 3.933 | 4.363 | 4.457 | 3.185 | 3.606 | 0.687 | 0.606 |
| 5.573 | 5.471 | 6.412 | 5.012 | 5.087 | 0.382 | 0.606 |
| 3.552 | 3.940 | 4.024 | 3.556 | 3.305 | 0.347 | 0.606 |
| 4.940 | 5.230 | 4.530 | 5.214 | 5.518 | 0.361 | 0.606 |
| 7.769 | 7.944 | 7.663 | 8.345 | 8.300 | 0.326 | 0.606 |
| 6.533 | 6.406 | 7.279 | 5.886 | 5.831 | 0.394 | 0.606 |
| 5.339 | 4.626 | 4.622 | 3.947 | 4.542 | 0.384 | 0.606 |
| 4.448 | 5.611 | 4.036 | 5.640 | 5.803 | 0.474 | 0.606 |
| 5.348 | 6.215 | 3.332 | 6.977 | 6.827 | 0.778 | 0.606 |
| 2.443 | 2.752 | 1.779 | 4.169 | 3.495 | 0.622 | 0.606 |
| 7.001 | 7.086 | 7.385 | 7.361 | 7.157 | 0.371 | 0.606 |
| 8.327 | 6.570 | 8.142 | 6.130 | 7.799 | 0.567 | 0.606 |
| 2.593 | 2.637 | 2.913 | 2.424 | 1.781 | 0.429 | 0.606 |
| 2.238 | 2.022 | 1.804 | 2.226 | 1.653 | 0.367 | 0.606 |
| 1.706 | 2.261 | 2.176 | 1.908 | 2.049 | 0.345 | 0.606 |
| 5.237 | 5.014 | 4.602 | 5.187 | 5.661 | 0.432 | 0.606 |
| 7.655 | 6.857 | 7.998 | 6.562 | 6.621 | 0.460 | 0.606 |
| 4.248 | 4.121 | 4.747 | 3.046 | 3.309 | 0.507 | 0.606 |
| 7.565 | 7.928 | 7.329 | 8.134 | 8.055 | 0.310 | 0.606 |
| 5.784 | 4.335 | 5.640 | 4.294 | 4.574 | 0.620 | 0.606 |
| 3.425 | 3.419 | 4.239 | 3.229 | 3.712 | 0.354 | 0.606 |
| 5.892 | 6.319 | 5.301 | 6.584 | 6.810 | 0.506 | 0.606 |
| 6.369 | 6.969 | 6.910 | 7.443 | 7.163 | 0.433 | 0.606 |
| 4.719 | 4.567 | 4.183 | 4.168 | 4.407 | 0.440 | 0.606 |
| 3.459 | 4.105 | 3.358 | 2.695 | 3.594 | 0.468 | 0.606 |
| 6.008 | 6.470 | 5.447 | 6.749 | 6.242 | 0.427 | 0.606 |
| 3.991 | 4.419 | 3.758 | 4.459 | 4.895 | 0.463 | 0.606 |
| 6.155 | 4.937 | 5.883 | 4.836 | 5.108 | 0.550 | 0.606 |
| 4.042 | 2.860 | 3.287 | 1.542 | 1.949 | 0.615 | 0.606 |
| 2.600 | 2.569 | 2.581 | 2.311 | 2.638 | 0.360 | 0.606 |
| 2.752 | 4.757 | 3.000 | 3.855 | 4.611 | 0.577 | 0.606 |
| 7.971 | 6.344 | 7.840 | 5.398 | 5.244 | 0.710 | 0.606 |
| 6.686 | 5.399 | 7.286 | 4.442 | 5.395 | 0.693 | 0.606 |
| 3.628 | 3.309 | 4.332 | 3.238 | 2.959 | 0.439 | 0.606 |
| 3.946 | 4.259 | 3.957 | 5.061 | 4.664 | 0.418 | 0.606 |
| 4.921 | 4.546 | 5.952 | 4.743 | 4.689 | 0.439 | 0.606 |
| 6.214 | 5.632 | 6.369 | 5.599 | 5.196 | 0.407 | 0.606 |

|        |       |        |       |       |       |       |
|--------|-------|--------|-------|-------|-------|-------|
| 8.325  | 8.282 | 8.758  | 8.296 | 8.578 | 0.385 | 0.606 |
| 2.670  | 3.571 | 2.693  | 2.457 | 1.841 | 0.699 | 0.606 |
| 2.647  | 3.219 | 1.868  | 3.129 | 1.793 | 0.750 | 0.606 |
| 4.585  | 4.662 | 5.089  | 4.504 | 4.662 | 0.548 | 0.606 |
| 4.836  | 4.375 | 4.496  | 5.168 | 4.218 | 0.431 | 0.606 |
| 5.437  | 7.438 | 6.913  | 6.946 | 4.819 | 0.857 | 0.606 |
| 7.376  | 6.410 | 8.276  | 5.519 | 6.078 | 0.544 | 0.606 |
| 6.508  | 5.443 | 6.727  | 5.379 | 5.343 | 0.508 | 0.606 |
| 3.120  | 2.961 | 4.500  | 2.732 | 2.428 | 0.500 | 0.606 |
| 10.348 | 9.486 | 10.602 | 8.863 | 9.047 | 0.449 | 0.606 |
| 6.036  | 6.387 | 6.012  | 6.789 | 6.438 | 0.388 | 0.606 |
| 4.881  | 5.878 | 5.383  | 5.058 | 4.917 | 0.443 | 0.606 |
| 7.961  | 8.483 | 8.317  | 7.847 | 8.105 | 0.435 | 0.606 |
| 6.297  | 6.863 | 7.720  | 6.103 | 6.276 | 0.419 | 0.606 |
| 3.469  | 5.664 | 5.038  | 4.477 | 4.719 | 0.679 | 0.606 |
| 1.935  | 1.798 | 4.034  | 1.979 | 2.264 | 0.622 | 0.606 |
| 4.627  | 5.093 | 6.740  | 3.437 | 4.845 | 0.788 | 0.606 |
| 2.110  | 4.215 | 1.877  | 2.515 | 2.186 | 0.706 | 0.606 |
| 2.846  | 4.785 | 4.897  | 3.666 | 3.319 | 0.594 | 0.606 |
| 3.503  | 4.861 | 4.286  | 2.216 | 3.001 | 0.762 | 0.606 |
| 2.863  | 3.272 | 4.943  | 2.250 | 3.544 | 0.571 | 0.606 |
| 3.589  | 6.587 | 4.792  | 3.307 | 3.652 | 1.019 | 0.606 |
| 2.554  | 4.339 | 2.909  | 3.813 | 2.475 | 0.773 | 0.606 |
| 5.061  | 6.496 | 7.032  | 5.551 | 5.783 | 0.527 | 0.606 |
| 4.030  | 6.409 | 2.818  | 5.353 | 5.394 | 0.907 | 0.606 |
| 3.049  | 2.366 | 4.231  | 2.963 | 2.480 | 0.661 | 0.606 |
| 1.351  | 2.784 | 1.996  | 1.280 | 2.057 | 0.539 | 0.606 |
| 3.841  | 4.669 | 2.453  | 4.733 | 4.353 | 0.681 | 0.606 |
| 4.103  | 2.853 | 5.437  | 3.012 | 2.179 | 0.867 | 0.606 |
| 2.955  | 4.838 | 4.541  | 4.441 | 3.593 | 0.684 | 0.606 |
| 3.982  | 5.500 | 4.310  | 1.984 | 2.966 | 1.129 | 0.606 |
| 3.887  | 4.758 | 4.222  | 4.648 | 3.191 | 0.489 | 0.606 |
| 5.413  | 5.921 | 4.431  | 6.566 | 5.374 | 0.591 | 0.606 |
| 3.921  | 4.238 | 6.629  | 3.939 | 3.967 | 0.619 | 0.606 |
| 8.456  | 9.562 | 8.528  | 9.425 | 9.650 | 0.405 | 0.606 |
| 2.650  | 3.561 | 4.431  | 1.975 | 2.999 | 0.685 | 0.606 |
| 6.632  | 8.331 | 7.663  | 6.355 | 7.230 | 0.644 | 0.606 |
| 9.525  | 9.516 | 9.284  | 8.667 | 9.378 | 0.330 | 0.606 |
| 6.089  | 6.750 | 7.112  | 5.980 | 6.232 | 0.387 | 0.606 |
| 4.419  | 5.320 | 7.472  | 5.577 | 5.126 | 0.579 | 0.606 |
| 4.607  | 5.589 | 6.968  | 3.992 | 4.724 | 0.565 | 0.606 |
| 3.703  | 4.133 | 4.697  | 3.112 | 3.983 | 0.534 | 0.606 |
| 4.159  | 6.118 | 5.478  | 4.542 | 5.190 | 0.598 | 0.606 |
| 5.527  | 4.588 | 5.067  | 3.494 | 3.752 | 0.511 | 0.606 |
| 5.240  | 6.126 | 8.008  | 6.392 | 5.980 | 0.619 | 0.606 |
| 4.055  | 5.069 | 2.728  | 3.508 | 4.202 | 0.689 | 0.606 |
| 4.821  | 5.170 | 4.630  | 5.643 | 5.834 | 0.369 | 0.606 |
| 7.727  | 9.031 | 7.630  | 9.314 | 9.228 | 0.533 | 0.606 |
| 7.231  | 7.474 | 5.549  | 7.442 | 7.340 | 0.462 | 0.606 |
| 4.366  | 5.643 | 5.427  | 3.964 | 3.491 | 0.731 | 0.606 |

|       |       |       |       |       |       |       |
|-------|-------|-------|-------|-------|-------|-------|
| 4.098 | 4.223 | 4.542 | 3.311 | 4.008 | 0.425 | 0.606 |
| 5.156 | 5.335 | 5.263 | 4.055 | 5.365 | 0.394 | 0.606 |
| 7.101 | 7.274 | 7.147 | 6.122 | 6.954 | 0.459 | 0.606 |
| 7.117 | 7.293 | 6.931 | 5.968 | 7.199 | 0.411 | 0.606 |
| 4.025 | 4.021 | 3.651 | 3.861 | 4.946 | 0.475 | 0.606 |
| 6.640 | 6.004 | 6.067 | 4.835 | 6.204 | 0.847 | 0.606 |
| 8.436 | 8.723 | 8.570 | 7.465 | 8.420 | 0.415 | 0.606 |
| 7.140 | 7.090 | 7.155 | 5.693 | 7.086 | 0.459 | 0.606 |
| 8.259 | 8.245 | 8.385 | 6.920 | 8.268 | 0.436 | 0.606 |
| 8.573 | 8.153 | 8.080 | 6.947 | 8.422 | 0.430 | 0.606 |
| 5.835 | 4.904 | 5.230 | 5.030 | 5.235 | 0.409 | 0.606 |
| 7.566 | 7.852 | 7.737 | 6.596 | 7.710 | 0.415 | 0.606 |
| 7.135 | 7.481 | 7.380 | 6.197 | 7.352 | 0.409 | 0.606 |
| 7.176 | 7.171 | 6.769 | 5.714 | 7.186 | 0.428 | 0.606 |
| 6.875 | 7.250 | 7.076 | 6.117 | 7.066 | 0.381 | 0.606 |
| 7.150 | 7.310 | 6.742 | 5.683 | 7.276 | 0.446 | 0.606 |
| 5.220 | 4.952 | 5.408 | 4.614 | 4.717 | 0.508 | 0.606 |
| 5.249 | 4.798 | 5.240 | 3.825 | 4.403 | 0.574 | 0.606 |
| 5.222 | 4.950 | 5.384 | 3.990 | 4.584 | 0.556 | 0.606 |
| 5.457 | 4.987 | 5.314 | 3.660 | 4.637 | 0.607 | 0.606 |
| 5.424 | 4.979 | 5.241 | 3.692 | 4.709 | 0.582 | 0.606 |
| 5.482 | 5.014 | 5.455 | 3.534 | 4.674 | 0.638 | 0.606 |
| 5.468 | 5.020 | 5.385 | 3.521 | 4.678 | 0.631 | 0.606 |
| 5.436 | 4.718 | 5.209 | 3.458 | 4.422 | 0.676 | 0.606 |
| 5.422 | 4.718 | 5.210 | 3.458 | 4.397 | 0.672 | 0.606 |
| 4.590 | 3.926 | 4.363 | 2.897 | 3.688 | 0.650 | 0.606 |
| 4.623 | 4.536 | 4.874 | 4.077 | 3.866 | 0.498 | 0.606 |
| 4.299 | 4.012 | 4.474 | 2.996 | 3.632 | 0.537 | 0.606 |
| 2.808 | 2.632 | 3.188 | 1.660 | 2.303 | 0.519 | 0.606 |
| 4.393 | 3.977 | 4.391 | 2.964 | 3.586 | 0.549 | 0.606 |
| 3.158 | 2.595 | 3.059 | 1.930 | 2.387 | 0.542 | 0.606 |
| 4.924 | 4.415 | 5.131 | 3.198 | 4.343 | 0.594 | 0.606 |
| 4.916 | 4.399 | 5.121 | 3.204 | 4.202 | 0.598 | 0.606 |
| 4.054 | 3.444 | 4.210 | 2.311 | 3.122 | 0.580 | 0.606 |
| 5.185 | 4.598 | 5.369 | 3.318 | 4.303 | 0.619 | 0.606 |
| 3.914 | 3.208 | 4.114 | 2.047 | 3.057 | 0.632 | 0.606 |
| 7.552 | 6.718 | 7.446 | 5.342 | 6.485 | 0.610 | 0.606 |
| 5.579 | 4.673 | 5.489 | 3.574 | 4.565 | 0.603 | 0.606 |
| 6.634 | 5.866 | 6.567 | 4.791 | 5.698 | 0.578 | 0.606 |
| 6.629 | 5.890 | 6.609 | 4.593 | 5.698 | 0.594 | 0.606 |
| 3.087 | 2.853 | 3.449 | 1.824 | 3.164 | 0.544 | 0.606 |
| 2.380 | 2.425 | 1.623 | 1.779 | 1.605 | 0.590 | 0.606 |
| 1.869 | 2.172 | 2.252 | 1.881 | 1.686 | 0.462 | 0.606 |
| 2.075 | 2.477 | 2.490 | 1.681 | 1.724 | 0.497 | 0.606 |
| 4.360 | 4.619 | 4.758 | 3.462 | 4.343 | 0.745 | 0.606 |
| 6.192 | 4.783 | 5.344 | 3.858 | 4.329 | 0.806 | 0.606 |
| 5.673 | 3.952 | 4.801 | 3.209 | 3.755 | 0.835 | 0.606 |
| 3.584 | 3.296 | 3.206 | 2.194 | 2.830 | 0.610 | 0.606 |
| 4.386 | 3.850 | 4.220 | 2.716 | 3.234 | 0.608 | 0.606 |
| 5.007 | 4.483 | 4.856 | 3.204 | 3.810 | 0.627 | 0.606 |

|       |       |       |       |       |       |       |
|-------|-------|-------|-------|-------|-------|-------|
| 4.442 | 3.856 | 4.023 | 2.764 | 3.231 | 0.594 | 0.606 |
| 4.672 | 4.116 | 4.281 | 2.977 | 3.428 | 0.593 | 0.606 |
| 4.676 | 4.044 | 4.193 | 2.876 | 3.308 | 0.618 | 0.606 |
| 5.326 | 4.754 | 4.785 | 3.765 | 4.132 | 0.565 | 0.606 |
| 4.456 | 4.322 | 4.170 | 4.833 | 3.454 | 0.559 | 0.606 |
| 3.434 | 3.336 | 2.734 | 3.144 | 2.353 | 0.520 | 0.606 |
| 2.655 | 2.812 | 2.860 | 2.641 | 1.734 | 0.431 | 0.606 |
| 2.394 | 2.429 | 2.724 | 2.420 | 1.556 | 0.420 | 0.606 |
| 2.340 | 2.323 | 2.431 | 2.600 | 1.911 | 0.416 | 0.606 |
| 2.434 | 2.299 | 2.332 | 2.560 | 1.907 | 0.422 | 0.606 |
| 2.463 | 2.311 | 2.457 | 2.373 | 1.717 | 0.450 | 0.606 |
| 7.130 | 8.376 | 8.283 | 4.245 | 6.750 | 0.967 | 0.606 |
| 9.181 | 9.105 | 9.351 | 6.254 | 8.127 | 0.717 | 0.606 |
| 9.212 | 9.165 | 9.378 | 6.244 | 8.143 | 0.721 | 0.606 |
| 8.798 | 8.747 | 8.986 | 5.935 | 7.809 | 0.713 | 0.606 |
| 9.077 | 8.991 | 9.217 | 6.048 | 7.939 | 0.727 | 0.606 |
| 1.192 | 7.439 | 1.246 | 1.350 | 1.028 | 2.657 | 0.606 |
| 3.577 | 4.195 | 3.823 | 2.733 | 2.977 | 0.522 | 0.606 |
| 3.567 | 4.335 | 4.059 | 3.062 | 3.000 | 0.538 | 0.606 |
| 7.054 | 6.674 | 6.527 | 5.177 | 5.595 | 0.540 | 0.606 |
| 3.288 | 2.318 | 2.714 | 2.301 | 2.482 | 1.184 | 0.606 |
| 6.257 | 6.004 | 5.335 | 4.297 | 5.225 | 0.549 | 0.606 |
| 8.173 | 7.666 | 7.192 | 5.759 | 6.535 | 0.616 | 0.606 |
| 4.920 | 6.872 | 6.804 | 4.268 | 6.096 | 0.997 | 0.606 |
| 4.041 | 6.214 | 6.005 | 3.787 | 4.253 | 1.133 | 0.606 |
| 1.219 | 7.682 | 1.547 | 1.261 | 1.462 | 2.631 | 0.606 |
| 2.159 | 1.919 | 2.266 | 1.727 | 1.717 | 0.362 | 0.606 |
| 7.726 | 8.435 | 8.293 | 6.989 | 8.233 | 0.412 | 0.606 |
| 7.777 | 8.427 | 8.354 | 7.028 | 8.221 | 0.407 | 0.606 |
| 4.978 | 5.304 | 5.009 | 4.319 | 5.068 | 0.331 | 0.606 |
| 4.880 | 5.056 | 4.585 | 3.861 | 4.863 | 0.385 | 0.606 |
| 5.031 | 5.033 | 4.679 | 4.104 | 4.843 | 0.348 | 0.606 |
| 4.993 | 5.079 | 4.551 | 3.998 | 4.823 | 0.378 | 0.606 |
| 3.839 | 4.019 | 3.740 | 3.392 | 3.705 | 0.311 | 0.606 |
| 3.468 | 3.924 | 3.657 | 3.047 | 3.600 | 0.320 | 0.606 |
| 3.225 | 3.639 | 3.350 | 2.897 | 3.317 | 0.318 | 0.606 |
| 4.980 | 5.341 | 5.112 | 5.198 | 4.726 | 0.478 | 0.606 |
| 5.919 | 8.737 | 5.228 | 9.213 | 8.818 | 0.899 | 0.606 |
| 1.931 | 2.279 | 2.195 | 2.548 | 2.511 | 0.352 | 0.606 |
| 2.285 | 1.482 | 2.652 | 2.419 | 1.909 | 0.515 | 0.606 |
| 5.977 | 6.405 | 5.341 | 6.208 | 6.585 | 0.359 | 0.606 |
| 4.138 | 3.855 | 4.576 | 3.372 | 3.565 | 0.370 | 0.606 |
| 6.298 | 6.271 | 4.991 | 6.294 | 6.601 | 0.501 | 0.606 |
| 2.334 | 3.181 | 4.155 | 2.567 | 3.037 | 0.486 | 0.606 |
| 3.941 | 4.301 | 4.308 | 3.514 | 3.860 | 0.409 | 0.606 |
| 7.626 | 7.404 | 6.534 | 7.494 | 7.648 | 0.464 | 0.606 |
| 7.320 | 6.394 | 5.769 | 6.246 | 6.591 | 0.531 | 0.606 |
| 4.095 | 4.087 | 4.630 | 3.544 | 4.012 | 0.463 | 0.606 |
| 2.620 | 2.990 | 4.568 | 2.619 | 2.916 | 0.518 | 0.606 |
| 4.194 | 3.909 | 4.029 | 3.703 | 4.006 | 0.397 | 0.606 |

|       |       |       |       |       |       |       |
|-------|-------|-------|-------|-------|-------|-------|
| 4.629 | 4.270 | 5.032 | 4.060 | 3.625 | 0.489 | 0.606 |
| 4.540 | 5.209 | 5.692 | 4.371 | 4.898 | 0.540 | 0.606 |
| 4.072 | 4.371 | 2.693 | 4.732 | 4.662 | 0.493 | 0.606 |
| 4.011 | 3.341 | 4.209 | 2.185 | 2.496 | 0.541 | 0.606 |
| 2.938 | 2.626 | 1.841 | 2.457 | 2.509 | 0.453 | 0.606 |
| 5.902 | 5.606 | 4.240 | 5.767 | 5.688 | 0.434 | 0.606 |
| 7.140 | 5.476 | 7.311 | 3.782 | 4.280 | 0.853 | 0.606 |
| 3.987 | 4.202 | 5.235 | 4.160 | 3.971 | 0.423 | 0.606 |
| 3.497 | 2.578 | 3.444 | 3.955 | 4.287 | 0.668 | 0.606 |
| 4.248 | 4.416 | 4.630 | 4.631 | 4.779 | 0.350 | 0.606 |
| 6.195 | 5.968 | 7.021 | 5.954 | 6.008 | 0.458 | 0.606 |
| 2.387 | 1.562 | 3.608 | 2.304 | 2.092 | 0.512 | 0.606 |
| 5.674 | 7.366 | 5.629 | 7.916 | 7.548 | 0.596 | 0.606 |
| 4.812 | 4.374 | 4.629 | 3.979 | 3.493 | 0.439 | 0.606 |
| 3.666 | 5.756 | 1.640 | 6.336 | 5.876 | 1.118 | 0.606 |
| 4.442 | 2.407 | 2.493 | 2.068 | 1.685 | 0.667 | 0.606 |
| 2.935 | 1.863 | 1.874 | 1.581 | 1.740 | 0.437 | 0.606 |
| 1.973 | 2.034 | 2.164 | 1.804 | 1.783 | 0.516 | 0.606 |
| 2.123 | 2.618 | 2.217 | 2.740 | 2.478 | 0.469 | 0.606 |
| 5.787 | 1.463 | 1.401 | 1.900 | 1.400 | 1.082 | 0.606 |
| 6.304 | 1.383 | 1.721 | 1.509 | 1.145 | 1.055 | 0.606 |
| 7.408 | 2.937 | 2.178 | 2.099 | 2.409 | 1.158 | 0.606 |
| 4.500 | 2.769 | 2.305 | 2.248 | 2.556 | 0.563 | 0.606 |
| 3.699 | 2.199 | 2.327 | 2.778 | 2.523 | 0.470 | 0.606 |
| 4.706 | 1.943 | 2.265 | 2.232 | 2.721 | 0.713 | 0.606 |
| 3.610 | 1.165 | 1.452 | 1.453 | 1.217 | 0.629 | 0.606 |
| 3.517 | 2.585 | 2.176 | 1.898 | 1.398 | 0.592 | 0.606 |
| 6.078 | 1.542 | 1.388 | 1.429 | 1.815 | 0.969 | 0.606 |
| 3.557 | 2.206 | 2.196 | 2.368 | 2.048 | 0.535 | 0.606 |
| 2.194 | 1.515 | 1.360 | 1.263 | 1.751 | 0.443 | 0.606 |
| 2.256 | 1.690 | 1.746 | 2.757 | 2.182 | 0.598 | 0.606 |
| 3.015 | 2.851 | 2.424 | 2.516 | 2.492 | 0.603 | 0.606 |
| 3.269 | 1.667 | 1.898 | 1.863 | 1.763 | 0.519 | 0.606 |
| 1.540 | 2.054 | 1.668 | 2.064 | 1.982 | 0.511 | 0.606 |
| 2.323 | 1.589 | 1.604 | 1.329 | 1.718 | 0.333 | 0.606 |
| 2.219 | 2.782 | 2.659 | 1.969 | 2.494 | 0.392 | 0.606 |
| 1.201 | 1.470 | 1.731 | 1.052 | 1.330 | 0.342 | 0.606 |
| 1.326 | 1.709 | 1.652 | 1.286 | 1.249 | 0.489 | 0.606 |
| 2.204 | 3.438 | 3.571 | 2.753 | 2.514 | 0.453 | 0.606 |
| 4.715 | 3.119 | 4.373 | 1.744 | 2.207 | 0.694 | 0.606 |
| 2.394 | 2.200 | 2.085 | 2.038 | 2.272 | 0.697 | 0.606 |
| 4.512 | 2.172 | 2.132 | 1.461 | 2.073 | 0.709 | 0.606 |
| 3.475 | 1.697 | 2.880 | 2.157 | 1.671 | 0.640 | 0.606 |
| 4.798 | 2.427 | 2.215 | 2.819 | 2.175 | 0.650 | 0.606 |
| 1.855 | 2.295 | 1.993 | 2.163 | 1.648 | 0.439 | 0.606 |
| 1.485 | 2.545 | 1.660 | 2.329 | 1.660 | 1.494 | 0.606 |
| 4.186 | 4.134 | 2.921 | 4.133 | 3.323 | 0.388 | 0.606 |
| 5.432 | 7.496 | 4.620 | 7.519 | 6.833 | 0.663 | 0.606 |
| 1.746 | 1.941 | 1.612 | 1.921 | 1.909 | 0.416 | 0.606 |
| 3.638 | 3.457 | 3.304 | 2.894 | 3.578 | 0.772 | 0.606 |



|        |        |        |        |        |       |       |
|--------|--------|--------|--------|--------|-------|-------|
| 3.814  | 3.344  | 4.837  | 2.763  | 3.029  | 0.478 | 0.606 |
| 3.484  | 3.491  | 5.052  | 2.155  | 2.734  | 0.538 | 0.606 |
| 6.654  | 6.519  | 5.517  | 7.098  | 7.080  | 0.471 | 0.606 |
| 7.052  | 7.026  | 7.597  | 7.006  | 7.198  | 0.394 | 0.606 |
| 5.534  | 5.277  | 6.771  | 4.934  | 5.561  | 0.430 | 0.606 |
| 1.965  | 2.503  | 2.249  | 2.872  | 2.808  | 0.412 | 0.606 |
| 2.473  | 3.378  | 3.092  | 2.322  | 3.336  | 0.562 | 0.606 |
| 5.922  | 3.605  | 4.961  | 4.194  | 4.433  | 0.712 | 0.606 |
| 2.948  | 3.370  | 3.001  | 3.781  | 4.166  | 0.435 | 0.606 |
| 3.668  | 3.226  | 3.485  | 4.493  | 4.261  | 0.444 | 0.606 |
| 4.795  | 4.731  | 4.861  | 4.877  | 5.252  | 0.521 | 0.606 |
| 3.167  | 4.238  | 3.528  | 4.689  | 4.445  | 0.459 | 0.606 |
| 4.470  | 5.727  | 2.205  | 5.972  | 5.494  | 0.782 | 0.606 |
| 1.186  | 3.023  | 1.839  | 2.677  | 2.797  | 0.426 | 0.606 |
| 5.914  | 6.062  | 5.137  | 6.355  | 6.500  | 0.369 | 0.606 |
| 2.450  | 4.308  | 2.037  | 4.480  | 4.096  | 0.624 | 0.606 |
| 3.344  | 2.363  | 1.738  | 2.792  | 3.659  | 0.710 | 0.606 |
| 2.133  | 3.171  | 2.032  | 3.537  | 2.674  | 0.521 | 0.606 |
| 6.413  | 5.424  | 5.521  | 4.936  | 5.233  | 0.567 | 0.606 |
| 3.676  | 3.969  | 2.957  | 4.862  | 4.067  | 0.450 | 0.606 |
| 4.252  | 3.276  | 2.327  | 3.620  | 4.064  | 0.488 | 0.606 |
| 6.638  | 8.259  | 4.337  | 8.561  | 8.296  | 0.860 | 0.606 |
| 4.536  | 4.054  | 4.986  | 4.775  | 5.410  | 0.491 | 0.606 |
| 4.914  | 5.887  | 3.904  | 5.729  | 5.644  | 0.463 | 0.606 |
| 2.283  | 3.396  | 1.862  | 4.058  | 2.541  | 0.512 | 0.606 |
| 3.691  | 3.624  | 4.437  | 3.354  | 3.873  | 0.495 | 0.606 |
| 5.223  | 5.181  | 5.595  | 4.956  | 5.684  | 0.398 | 0.606 |
| 5.395  | 5.238  | 5.340  | 4.644  | 4.410  | 0.359 | 0.606 |
| 2.008  | 1.847  | 2.106  | 2.248  | 2.081  | 0.403 | 0.606 |
| 3.819  | 4.398  | 4.103  | 4.086  | 4.273  | 0.358 | 0.606 |
| 3.867  | 3.223  | 4.541  | 3.619  | 3.795  | 0.485 | 0.606 |
| 3.815  | 3.734  | 4.125  | 2.386  | 1.946  | 0.633 | 0.606 |
| 3.356  | 3.150  | 2.887  | 2.897  | 3.727  | 0.427 | 0.606 |
| 5.519  | 5.352  | 5.129  | 4.559  | 4.616  | 0.409 | 0.606 |
| 3.446  | 2.997  | 2.885  | 2.540  | 3.186  | 0.450 | 0.606 |
| 2.983  | 4.178  | 3.344  | 3.150  | 3.247  | 0.395 | 0.606 |
| 7.728  | 7.471  | 6.148  | 8.081  | 7.748  | 0.455 | 0.606 |
| 5.380  | 5.349  | 4.801  | 5.878  | 6.022  | 0.429 | 0.606 |
| 3.660  | 4.846  | 4.284  | 3.836  | 4.674  | 0.480 | 0.606 |
| 3.707  | 4.655  | 2.738  | 4.790  | 4.606  | 0.574 | 0.606 |
| 4.944  | 5.230  | 4.141  | 5.314  | 5.520  | 0.450 | 0.606 |
| 3.844  | 5.831  | 5.950  | 6.370  | 5.224  | 0.662 | 0.606 |
| 3.466  | 2.470  | 3.110  | 2.013  | 2.650  | 0.608 | 0.606 |
| 7.748  | 8.040  | 7.236  | 8.311  | 8.166  | 0.542 | 0.606 |
| 2.873  | 2.317  | 2.028  | 2.039  | 2.688  | 0.387 | 0.606 |
| 2.681  | 3.385  | 2.465  | 3.576  | 3.734  | 0.460 | 0.606 |
| 4.483  | 4.793  | 4.333  | 5.024  | 5.051  | 0.357 | 0.606 |
| 10.080 | 10.773 | 11.763 | 10.490 | 10.074 | 0.518 | 0.606 |
| 10.145 | 10.905 | 11.837 | 10.581 | 10.173 | 0.515 | 0.606 |
| 9.563  | 10.310 | 11.404 | 10.040 | 9.659  | 0.548 | 0.606 |

|       |        |        |        |       |       |       |
|-------|--------|--------|--------|-------|-------|-------|
| 9.275 | 10.016 | 10.984 | 9.816  | 9.374 | 0.538 | 0.606 |
| 9.765 | 10.516 | 11.414 | 10.299 | 9.831 | 0.516 | 0.606 |
| 9.475 | 10.270 | 11.074 | 9.956  | 9.510 | 0.511 | 0.606 |
| 9.363 | 10.106 | 11.035 | 9.892  | 9.342 | 0.547 | 0.606 |
| 9.296 | 10.072 | 11.108 | 9.903  | 9.269 | 0.564 | 0.606 |
| 4.064 | 4.418  | 5.270  | 4.516  | 4.872 | 0.440 | 0.606 |
| 4.247 | 4.824  | 5.428  | 4.624  | 5.099 | 0.440 | 0.606 |
| 9.452 | 8.562  | 10.281 | 7.514  | 7.405 | 0.665 | 0.606 |
| 7.541 | 7.450  | 7.092  | 8.318  | 8.053 | 0.486 | 0.606 |
| 9.572 | 9.700  | 9.251  | 9.439  | 9.466 | 0.451 | 0.606 |
| 2.768 | 2.760  | 3.502  | 3.003  | 2.337 | 0.663 | 0.606 |
| 1.641 | 1.316  | 2.695  | 2.378  | 1.716 | 0.708 | 0.606 |
| 8.918 | 9.487  | 10.303 | 9.337  | 8.913 | 0.622 | 0.606 |
| 1.104 | 3.889  | 1.479  | 3.828  | 4.142 | 0.763 | 0.606 |
| 5.411 | 4.452  | 4.297  | 4.014  | 4.852 | 0.527 | 0.606 |
| 3.220 | 2.261  | 2.394  | 1.757  | 2.264 | 0.394 | 0.606 |
| 4.345 | 4.793  | 5.064  | 4.505  | 4.656 | 0.418 | 0.606 |
| 3.721 | 3.944  | 3.869  | 3.524  | 3.917 | 0.366 | 0.606 |
| 8.758 | 9.483  | 9.277  | 9.989  | 9.489 | 0.596 | 0.606 |
| 5.337 | 5.809  | 6.915  | 4.989  | 5.353 | 0.546 | 0.606 |
| 3.785 | 5.236  | 1.786  | 6.053  | 5.755 | 0.896 | 0.606 |
| 3.735 | 4.046  | 2.133  | 4.427  | 4.856 | 0.652 | 0.606 |
| 2.998 | 5.467  | 1.847  | 5.846  | 5.989 | 0.917 | 0.606 |
| 3.124 | 3.486  | 1.450  | 4.132  | 4.246 | 0.615 | 0.606 |
| 6.021 | 8.560  | 4.379  | 9.120  | 8.870 | 0.969 | 0.606 |
| 7.079 | 2.698  | 2.018  | 4.003  | 3.823 | 1.071 | 0.606 |
| 1.753 | 4.722  | 3.086  | 5.573  | 5.511 | 0.843 | 0.606 |
| 3.340 | 4.058  | 3.165  | 4.708  | 4.282 | 0.437 | 0.606 |
| 5.101 | 5.903  | 3.280  | 6.636  | 5.941 | 0.796 | 0.606 |
| 3.384 | 5.768  | 2.288  | 5.807  | 5.566 | 0.784 | 0.606 |
| 2.518 | 2.619  | 2.295  | 2.225  | 2.103 | 0.416 | 0.606 |
| 2.897 | 5.092  | 2.481  | 5.869  | 5.276 | 0.713 | 0.606 |
| 3.275 | 3.535  | 4.089  | 3.023  | 2.788 | 0.440 | 0.606 |
| 3.242 | 2.813  | 2.957  | 2.808  | 2.813 | 0.479 | 0.606 |
| 4.152 | 2.861  | 3.150  | 3.459  | 2.979 | 0.450 | 0.606 |
| 4.526 | 4.295  | 4.969  | 3.372  | 3.765 | 0.507 | 0.606 |
| 4.859 | 4.389  | 4.926  | 3.992  | 4.128 | 0.397 | 0.606 |
| 3.408 | 3.380  | 3.986  | 3.278  | 3.079 | 0.416 | 0.606 |
| 3.776 | 4.551  | 2.144  | 4.810  | 4.934 | 0.576 | 0.606 |
| 5.155 | 5.150  | 4.339  | 5.628  | 5.460 | 0.347 | 0.606 |
| 4.362 | 5.017  | 4.766  | 3.217  | 4.050 | 0.559 | 0.606 |
| 5.534 | 5.628  | 5.359  | 5.220  | 6.036 | 0.471 | 0.606 |
| 2.640 | 2.272  | 2.508  | 2.326  | 3.347 | 0.450 | 0.606 |
| 1.867 | 5.481  | 1.757  | 5.701  | 5.284 | 0.949 | 0.606 |
| 5.674 | 5.945  | 6.270  | 6.190  | 6.142 | 0.352 | 0.606 |
| 5.848 | 5.139  | 5.236  | 3.672  | 4.321 | 0.499 | 0.606 |
| 6.012 | 5.848  | 6.195  | 4.578  | 6.146 | 0.581 | 0.606 |
| 3.213 | 4.473  | 3.876  | 4.064  | 3.737 | 0.455 | 0.606 |
| 3.911 | 3.944  | 4.491  | 3.337  | 3.864 | 0.550 | 0.606 |
| 6.511 | 5.682  | 6.082  | 5.780  | 5.710 | 0.430 | 0.606 |

|       |       |       |       |       |       |       |
|-------|-------|-------|-------|-------|-------|-------|
| 3.461 | 3.981 | 3.036 | 3.828 | 3.986 | 0.339 | 0.606 |
| 4.495 | 3.723 | 3.980 | 3.979 | 4.435 | 0.353 | 0.606 |
| 8.697 | 9.339 | 7.720 | 9.482 | 9.371 | 0.410 | 0.606 |
| 4.366 | 4.589 | 3.960 | 3.981 | 3.631 | 0.367 | 0.606 |
| 4.337 | 4.182 | 4.006 | 3.705 | 4.557 | 0.582 | 0.606 |
| 4.275 | 4.366 | 4.045 | 3.442 | 4.706 | 0.626 | 0.606 |
| 4.746 | 4.746 | 4.456 | 3.734 | 5.022 | 0.599 | 0.606 |
| 4.733 | 5.325 | 5.205 | 5.488 | 5.799 | 0.393 | 0.606 |
| 3.325 | 5.235 | 4.579 | 5.877 | 5.207 | 0.652 | 0.606 |
| 3.118 | 4.037 | 3.376 | 4.163 | 3.356 | 0.656 | 0.606 |
| 7.230 | 7.069 | 7.761 | 5.862 | 6.643 | 0.477 | 0.606 |
| 3.723 | 3.200 | 3.542 | 3.054 | 3.555 | 0.400 | 0.606 |
| 4.739 | 6.386 | 6.041 | 3.199 | 5.291 | 0.988 | 0.606 |
| 4.406 | 5.162 | 4.470 | 3.470 | 4.064 | 0.502 | 0.606 |
| 4.335 | 2.934 | 3.687 | 2.668 | 3.705 | 0.553 | 0.606 |
| 4.421 | 3.264 | 4.339 | 3.109 | 4.150 | 0.648 | 0.606 |
| 7.670 | 8.096 | 7.703 | 7.913 | 8.617 | 0.791 | 0.606 |
| 3.708 | 2.822 | 3.488 | 2.773 | 3.430 | 0.419 | 0.606 |
| 4.844 | 5.232 | 5.360 | 5.504 | 5.453 | 0.506 | 0.606 |
| 4.528 | 4.243 | 5.656 | 3.802 | 4.340 | 0.456 | 0.606 |
| 4.073 | 4.091 | 4.182 | 3.453 | 4.151 | 0.614 | 0.606 |
| 6.212 | 7.333 | 6.967 | 5.823 | 7.626 | 0.563 | 0.606 |
| 7.640 | 8.551 | 7.229 | 5.945 | 7.012 | 0.700 | 0.606 |
| 4.008 | 5.686 | 4.923 | 3.090 | 4.341 | 0.516 | 0.606 |
| 1.977 | 3.099 | 3.145 | 2.155 | 2.388 | 0.512 | 0.606 |
| 2.233 | 4.224 | 3.784 | 2.853 | 2.946 | 0.580 | 0.606 |
| 2.649 | 4.409 | 4.321 | 2.897 | 3.099 | 0.645 | 0.606 |
| 3.139 | 4.996 | 4.807 | 3.420 | 3.610 | 0.649 | 0.606 |
| 3.049 | 4.614 | 3.888 | 2.753 | 3.303 | 0.555 | 0.606 |
| 2.485 | 3.017 | 3.505 | 3.621 | 2.970 | 0.438 | 0.606 |
| 5.939 | 5.173 | 5.945 | 4.837 | 5.099 | 0.404 | 0.606 |
| 2.505 | 3.466 | 4.065 | 3.096 | 3.096 | 0.415 | 0.606 |
| 5.938 | 6.311 | 5.352 | 6.458 | 6.382 | 0.349 | 0.606 |
| 0.878 | 3.199 | 2.180 | 3.209 | 3.532 | 0.637 | 0.606 |
| 6.853 | 6.177 | 7.704 | 6.745 | 6.603 | 0.400 | 0.606 |
| 4.178 | 2.365 | 3.850 | 2.268 | 2.231 | 0.654 | 0.606 |
| 4.380 | 3.372 | 4.219 | 2.977 | 3.451 | 0.423 | 0.606 |
| 3.034 | 3.715 | 2.632 | 4.142 | 3.815 | 0.398 | 0.606 |
| 2.641 | 2.397 | 2.864 | 2.862 | 2.418 | 0.405 | 0.606 |
| 2.487 | 2.152 | 2.880 | 2.599 | 2.980 | 0.412 | 0.606 |
| 2.565 | 3.030 | 2.879 | 3.288 | 3.991 | 0.487 | 0.606 |
| 3.327 | 5.397 | 4.215 | 5.066 | 4.467 | 0.701 | 0.606 |
| 4.164 | 5.858 | 3.658 | 5.200 | 5.285 | 0.871 | 0.606 |
| 5.967 | 7.120 | 6.822 | 6.638 | 6.437 | 0.586 | 0.606 |
| 3.888 | 4.231 | 3.549 | 4.051 | 4.393 | 0.599 | 0.606 |
| 7.873 | 8.302 | 8.237 | 7.021 | 8.025 | 0.400 | 0.606 |
| 1.995 | 3.281 | 2.449 | 2.714 | 3.354 | 0.513 | 0.606 |
| 3.122 | 3.858 | 2.739 | 4.676 | 4.114 | 0.476 | 0.606 |
| 3.977 | 4.428 | 4.090 | 3.150 | 3.023 | 0.506 | 0.606 |
| 3.328 | 2.872 | 4.645 | 4.565 | 2.910 | 0.545 | 0.606 |

|       |       |       |       |       |       |       |
|-------|-------|-------|-------|-------|-------|-------|
| 4.722 | 4.509 | 4.049 | 5.142 | 4.732 | 0.524 | 0.606 |
| 2.515 | 2.736 | 2.450 | 1.830 | 2.647 | 0.406 | 0.606 |
| 2.848 | 2.531 | 2.867 | 3.191 | 2.023 | 0.556 | 0.606 |
| 2.194 | 2.826 | 2.982 | 3.543 | 2.812 | 0.493 | 0.606 |
| 2.375 | 3.771 | 4.574 | 1.927 | 1.808 | 0.908 | 0.606 |
| 1.816 | 2.384 | 5.168 | 2.407 | 2.543 | 0.674 | 0.606 |
| 2.119 | 2.228 | 1.780 | 1.818 | 2.957 | 0.512 | 0.606 |
| 2.622 | 3.192 | 3.826 | 2.157 | 1.849 | 0.526 | 0.606 |
| 6.535 | 6.400 | 6.065 | 6.721 | 6.691 | 0.335 | 0.606 |
| 3.496 | 3.269 | 4.776 | 3.475 | 2.224 | 0.590 | 0.606 |
| 2.320 | 2.144 | 3.043 | 2.673 | 1.883 | 0.496 | 0.606 |
| 2.398 | 2.260 | 2.588 | 1.946 | 2.273 | 0.505 | 0.606 |
| 1.171 | 3.353 | 2.539 | 2.219 | 3.014 | 0.537 | 0.606 |
| 2.481 | 2.481 | 3.533 | 2.580 | 2.829 | 0.549 | 0.606 |
| 2.055 | 3.094 | 3.421 | 2.630 | 2.162 | 0.432 | 0.606 |
| 4.615 | 4.448 | 4.286 | 5.196 | 4.159 | 0.457 | 0.606 |
| 3.387 | 3.312 | 3.002 | 2.576 | 3.217 | 0.529 | 0.606 |
| 1.735 | 2.815 | 2.784 | 2.428 | 2.772 | 0.637 | 0.606 |
| 6.307 | 4.501 | 3.240 | 4.890 | 5.406 | 0.784 | 0.606 |
| 1.758 | 2.944 | 3.944 | 2.620 | 3.405 | 0.697 | 0.606 |
| 3.108 | 3.643 | 3.752 | 2.860 | 3.720 | 0.573 | 0.606 |
| 3.173 | 3.141 | 4.050 | 3.342 | 2.956 | 0.451 | 0.606 |
| 3.957 | 3.823 | 3.654 | 3.977 | 3.873 | 0.420 | 0.606 |
| 2.183 | 2.832 | 2.192 | 3.505 | 3.237 | 0.457 | 0.606 |
| 2.073 | 3.179 | 2.244 | 2.955 | 2.852 | 0.611 | 0.606 |
| 1.395 | 1.797 | 1.306 | 1.257 | 1.250 | 0.603 | 0.606 |
| 3.853 | 2.974 | 4.203 | 2.618 | 2.848 | 0.503 | 0.606 |
| 5.562 | 4.994 | 6.250 | 5.214 | 5.113 | 0.431 | 0.606 |
| 5.233 | 6.498 | 5.109 | 6.696 | 6.440 | 0.467 | 0.606 |
| 4.261 | 5.109 | 3.345 | 5.052 | 5.278 | 0.442 | 0.606 |
| 4.016 | 4.117 | 4.228 | 2.977 | 4.324 | 0.624 | 0.606 |
| 3.673 | 4.824 | 4.121 | 5.095 | 5.162 | 0.431 | 0.606 |
| 2.224 | 2.353 | 2.472 | 2.297 | 2.644 | 0.452 | 0.606 |
| 7.654 | 7.219 | 7.348 | 7.472 | 7.285 | 0.334 | 0.606 |
| 5.618 | 5.399 | 6.106 | 4.655 | 4.928 | 0.383 | 0.606 |
| 2.982 | 3.417 | 3.313 | 1.748 | 2.946 | 0.479 | 0.606 |
| 3.023 | 3.057 | 3.023 | 2.530 | 2.917 | 0.440 | 0.606 |
| 3.837 | 3.925 | 4.975 | 3.377 | 3.222 | 0.473 | 0.606 |
| 3.964 | 4.292 | 5.409 | 3.386 | 3.562 | 0.559 | 0.606 |
| 4.480 | 4.736 | 5.179 | 4.158 | 4.499 | 0.412 | 0.606 |
| 2.015 | 1.673 | 1.701 | 0.718 | 1.783 | 0.517 | 0.606 |
| 4.077 | 3.981 | 5.014 | 3.928 | 3.593 | 0.441 | 0.606 |
| 1.898 | 1.771 | 1.944 | 1.516 | 1.797 | 0.366 | 0.606 |
| 1.213 | 4.062 | 1.717 | 4.348 | 4.448 | 0.770 | 0.606 |
| 6.704 | 6.330 | 6.787 | 4.760 | 5.756 | 0.522 | 0.606 |
| 3.048 | 3.109 | 3.308 | 2.680 | 2.903 | 0.341 | 0.606 |
| 4.381 | 3.744 | 4.583 | 4.086 | 4.324 | 0.451 | 0.606 |
| 6.998 | 6.854 | 7.376 | 5.862 | 6.598 | 0.527 | 0.606 |
| 4.777 | 4.219 | 5.133 | 4.196 | 4.585 | 0.413 | 0.606 |
| 3.989 | 4.308 | 4.731 | 2.962 | 3.971 | 0.602 | 0.606 |

|       |       |       |        |        |       |       |
|-------|-------|-------|--------|--------|-------|-------|
| 4.422 | 5.054 | 3.736 | 3.685  | 4.453  | 0.451 | 0.606 |
| 3.161 | 2.590 | 2.587 | 3.740  | 3.156  | 0.454 | 0.606 |
| 1.438 | 1.921 | 1.331 | 1.752  | 1.861  | 0.485 | 0.606 |
| 2.539 | 2.913 | 2.867 | 2.001  | 2.414  | 0.599 | 0.606 |
| 3.728 | 4.507 | 4.525 | 4.139  | 4.108  | 0.528 | 0.606 |
| 1.901 | 3.997 | 2.600 | 2.585  | 2.349  | 0.755 | 0.606 |
| 3.183 | 3.632 | 2.894 | 3.625  | 3.259  | 0.436 | 0.606 |
| 6.678 | 6.700 | 7.692 | 6.989  | 6.841  | 0.448 | 0.606 |
| 1.081 | 1.359 | 0.913 | 2.581  | 2.701  | 0.518 | 0.606 |
| 3.611 | 3.775 | 4.176 | 4.577  | 3.974  | 0.771 | 0.606 |
| 1.966 | 1.390 | 2.107 | 1.768  | 1.926  | 0.398 | 0.606 |
| 2.555 | 2.358 | 2.111 | 1.690  | 1.530  | 0.445 | 0.606 |
| 4.032 | 3.601 | 1.994 | 3.095  | 2.492  | 0.790 | 0.606 |
| 2.016 | 2.092 | 2.494 | 1.974  | 1.901  | 0.586 | 0.606 |
| 2.718 | 2.821 | 2.695 | 2.394  | 2.646  | 0.532 | 0.606 |
| 1.822 | 2.369 | 1.723 | 2.103  | 1.682  | 0.364 | 0.606 |
| 3.325 | 4.339 | 3.959 | 3.574  | 4.852  | 0.543 | 0.606 |
| 3.812 | 4.695 | 2.608 | 4.791  | 4.516  | 0.633 | 0.606 |
| 4.004 | 3.694 | 3.344 | 3.611  | 4.087  | 0.446 | 0.606 |
| 4.148 | 4.238 | 4.015 | 4.034  | 4.339  | 0.456 | 0.606 |
| 4.937 | 5.733 | 5.657 | 4.110  | 5.586  | 0.576 | 0.606 |
| 4.940 | 5.336 | 5.044 | 4.802  | 5.402  | 0.332 | 0.606 |
| 2.689 | 2.547 | 3.567 | 2.483  | 2.595  | 0.504 | 0.606 |
| 5.059 | 6.166 | 5.236 | 6.608  | 6.200  | 0.565 | 0.606 |
| 6.317 | 6.795 | 6.298 | 7.012  | 7.296  | 0.385 | 0.606 |
| 6.274 | 5.370 | 5.671 | 5.306  | 5.993  | 0.365 | 0.606 |
| 3.489 | 2.879 | 2.572 | 3.939  | 3.452  | 0.379 | 0.606 |
| 9.745 | 9.682 | 4.183 | 10.137 | 10.276 | 1.369 | 0.606 |
| 5.772 | 5.386 | 6.715 | 5.045  | 5.189  | 0.422 | 0.606 |
| 2.565 | 2.477 | 2.192 | 2.177  | 2.213  | 0.376 | 0.606 |
| 1.768 | 1.906 | 1.576 | 2.578  | 3.628  | 0.551 | 0.606 |
| 5.154 | 4.494 | 3.497 | 4.141  | 4.419  | 0.453 | 0.606 |
| 6.135 | 6.468 | 6.623 | 6.740  | 6.573  | 0.357 | 0.606 |
| 4.619 | 4.125 | 4.249 | 4.511  | 4.319  | 0.397 | 0.606 |
| 7.265 | 7.714 | 6.138 | 7.957  | 8.072  | 0.419 | 0.606 |
| 4.239 | 3.884 | 3.120 | 4.764  | 4.431  | 0.396 | 0.606 |
| 6.617 | 7.097 | 6.601 | 7.429  | 7.330  | 0.321 | 0.606 |
| 6.070 | 5.822 | 6.271 | 4.829  | 5.154  | 0.487 | 0.606 |
| 5.052 | 5.267 | 3.848 | 5.094  | 4.908  | 0.436 | 0.606 |
| 8.419 | 7.537 | 6.595 | 8.056  | 7.631  | 0.437 | 0.606 |
| 2.865 | 3.240 | 2.396 | 3.551  | 3.098  | 0.384 | 0.606 |
| 6.008 | 5.576 | 5.503 | 5.528  | 5.514  | 0.335 | 0.606 |
| 1.917 | 1.968 | 2.027 | 1.936  | 2.250  | 0.393 | 0.606 |
| 7.827 | 6.786 | 7.030 | 6.357  | 6.732  | 0.454 | 0.606 |
| 5.726 | 6.435 | 5.711 | 6.406  | 6.428  | 0.423 | 0.606 |
| 2.568 | 2.782 | 3.448 | 3.310  | 3.767  | 0.469 | 0.606 |
| 2.484 | 2.417 | 1.884 | 3.533  | 3.719  | 0.690 | 0.606 |
| 4.408 | 5.417 | 4.128 | 4.490  | 4.514  | 0.411 | 0.606 |
| 5.004 | 5.154 | 5.902 | 5.611  | 5.508  | 0.338 | 0.606 |
| 6.689 | 6.989 | 6.393 | 6.999  | 7.041  | 0.318 | 0.606 |

|        |       |       |       |       |       |       |
|--------|-------|-------|-------|-------|-------|-------|
| 5.206  | 4.581 | 6.579 | 4.040 | 3.111 | 0.717 | 0.606 |
| 3.964  | 6.999 | 3.992 | 7.365 | 7.318 | 0.874 | 0.606 |
| 5.493  | 5.531 | 5.705 | 5.870 | 5.892 | 0.336 | 0.606 |
| 6.932  | 6.337 | 7.352 | 6.079 | 5.981 | 0.386 | 0.606 |
| 4.567  | 3.852 | 4.560 | 4.408 | 4.092 | 0.367 | 0.606 |
| 7.276  | 7.361 | 6.726 | 7.646 | 7.544 | 0.366 | 0.606 |
| 3.951  | 3.783 | 3.034 | 4.293 | 4.269 | 0.682 | 0.606 |
| 5.871  | 4.482 | 4.309 | 5.173 | 5.137 | 0.667 | 0.606 |
| 6.990  | 6.271 | 5.712 | 6.710 | 6.554 | 0.399 | 0.606 |
| 6.849  | 5.712 | 5.308 | 6.444 | 6.173 | 0.521 | 0.606 |
| 4.844  | 3.952 | 3.020 | 4.425 | 4.420 | 0.525 | 0.606 |
| 3.692  | 3.562 | 2.441 | 2.740 | 3.731 | 0.534 | 0.606 |
| 4.263  | 3.556 | 2.982 | 3.917 | 4.242 | 0.443 | 0.606 |
| 1.785  | 3.588 | 2.009 | 0.948 | 2.955 | 0.614 | 0.606 |
| 5.655  | 5.345 | 4.502 | 4.910 | 4.885 | 0.460 | 0.606 |
| 3.468  | 3.665 | 2.107 | 1.195 | 3.423 | 0.644 | 0.606 |
| 9.797  | 8.525 | 8.053 | 9.006 | 8.893 | 0.448 | 0.606 |
| 3.650  | 3.421 | 3.626 | 2.479 | 2.998 | 0.476 | 0.606 |
| 9.117  | 7.853 | 7.834 | 8.414 | 8.447 | 0.443 | 0.606 |
| 3.693  | 3.448 | 2.604 | 4.224 | 3.619 | 0.509 | 0.606 |
| 8.367  | 7.022 | 6.630 | 7.430 | 7.649 | 0.477 | 0.606 |
| 10.299 | 9.160 | 8.700 | 9.498 | 9.532 | 0.447 | 0.606 |
| 6.817  | 5.402 | 5.546 | 6.301 | 6.331 | 0.437 | 0.606 |
| 9.726  | 8.529 | 8.142 | 9.155 | 9.030 | 0.436 | 0.606 |
| 8.349  | 7.265 | 7.079 | 7.601 | 7.538 | 0.450 | 0.606 |
| 6.753  | 5.436 | 5.324 | 5.663 | 5.300 | 0.529 | 0.606 |
| 8.159  | 7.206 | 6.831 | 7.677 | 7.522 | 0.470 | 0.606 |
| 9.379  | 8.167 | 7.936 | 8.573 | 8.688 | 0.461 | 0.606 |
| 8.174  | 6.901 | 6.531 | 7.361 | 7.605 | 0.433 | 0.606 |
| 7.202  | 6.188 | 6.222 | 6.698 | 6.693 | 0.399 | 0.606 |
| 8.553  | 7.073 | 7.004 | 7.915 | 7.899 | 0.450 | 0.606 |
| 6.706  | 5.556 | 5.487 | 5.879 | 5.219 | 0.529 | 0.606 |
| 5.860  | 5.439 | 4.867 | 5.282 | 5.584 | 0.414 | 0.606 |
| 3.599  | 4.433 | 3.919 | 4.651 | 3.926 | 0.393 | 0.606 |
| 7.920  | 7.331 | 8.794 | 6.279 | 7.114 | 0.478 | 0.606 |
| 2.915  | 2.282 | 2.637 | 2.554 | 2.631 | 0.492 | 0.606 |
| 7.335  | 8.093 | 6.498 | 8.051 | 7.951 | 0.421 | 0.606 |
| 5.073  | 5.869 | 3.339 | 6.218 | 6.007 | 0.591 | 0.606 |
| 4.897  | 5.358 | 2.285 | 5.680 | 5.636 | 0.786 | 0.606 |
| 4.090  | 3.810 | 3.272 | 4.535 | 4.570 | 0.488 | 0.606 |
| 4.831  | 4.648 | 4.267 | 4.232 | 4.069 | 0.348 | 0.606 |
| 3.621  | 3.738 | 4.163 | 3.988 | 4.038 | 0.394 | 0.606 |
| 4.764  | 5.545 | 5.369 | 4.517 | 4.814 | 0.517 | 0.606 |
| 3.420  | 3.479 | 4.437 | 2.822 | 3.626 | 0.458 | 0.606 |
| 6.781  | 6.862 | 6.146 | 7.085 | 7.295 | 0.369 | 0.606 |
| 3.394  | 2.842 | 3.368 | 3.011 | 3.025 | 0.492 | 0.606 |
| 6.297  | 6.086 | 7.342 | 5.617 | 5.662 | 0.482 | 0.606 |
| 3.091  | 3.352 | 3.107 | 3.050 | 2.572 | 0.380 | 0.606 |
| 4.572  | 5.511 | 4.077 | 4.040 | 4.897 | 0.585 | 0.606 |
| 5.408  | 5.893 | 6.046 | 4.799 | 4.796 | 0.402 | 0.606 |

|       |       |       |       |       |       |       |
|-------|-------|-------|-------|-------|-------|-------|
| 3.301 | 3.016 | 2.384 | 2.893 | 2.084 | 0.476 | 0.606 |
| 5.109 | 5.334 | 4.796 | 5.820 | 5.030 | 0.379 | 0.606 |
| 3.727 | 3.993 | 2.845 | 4.373 | 3.473 | 0.445 | 0.606 |
| 6.730 | 7.513 | 7.381 | 7.827 | 7.494 | 0.458 | 0.606 |
| 3.681 | 1.697 | 2.144 | 1.556 | 1.230 | 0.548 | 0.606 |
| 2.814 | 1.950 | 1.364 | 1.385 | 1.595 | 0.414 | 0.606 |
| 4.321 | 2.925 | 2.606 | 3.248 | 2.860 | 0.487 | 0.606 |
| 3.374 | 2.909 | 2.488 | 1.822 | 1.997 | 0.455 | 0.606 |
| 4.218 | 4.365 | 3.845 | 4.498 | 4.428 | 0.302 | 0.606 |
| 5.838 | 5.447 | 5.477 | 5.940 | 6.035 | 0.357 | 0.606 |
| 1.652 | 3.288 | 3.158 | 2.261 | 1.416 | 0.627 | 0.606 |
| 2.576 | 3.303 | 2.036 | 3.191 | 3.386 | 0.401 | 0.606 |
| 1.440 | 3.353 | 1.896 | 4.110 | 2.736 | 0.570 | 0.606 |
| 3.911 | 3.908 | 1.655 | 3.059 | 3.640 | 0.581 | 0.606 |
| 7.975 | 6.673 | 7.454 | 6.661 | 6.684 | 0.381 | 0.606 |
| 4.586 | 4.233 | 4.008 | 4.584 | 5.024 | 0.371 | 0.606 |
| 7.605 | 8.321 | 7.127 | 8.391 | 8.313 | 0.383 | 0.606 |
| 2.574 | 3.154 | 3.501 | 3.154 | 2.298 | 0.426 | 0.606 |
| 4.950 | 3.858 | 5.974 | 2.908 | 3.343 | 0.639 | 0.606 |
| 1.600 | 1.549 | 1.812 | 2.145 | 1.903 | 0.451 | 0.606 |
| 6.412 | 5.193 | 7.935 | 3.888 | 4.699 | 0.825 | 0.606 |
| 5.427 | 5.264 | 3.512 | 5.454 | 5.369 | 0.457 | 0.606 |
| 3.023 | 2.472 | 1.905 | 2.837 | 2.991 | 0.494 | 0.606 |
| 3.675 | 3.860 | 3.903 | 3.554 | 3.406 | 0.413 | 0.606 |
| 4.779 | 4.471 | 4.632 | 4.249 | 4.280 | 0.338 | 0.606 |
| 3.911 | 4.375 | 2.839 | 4.418 | 4.642 | 0.575 | 0.606 |
| 4.347 | 5.293 | 4.469 | 6.316 | 5.919 | 0.534 | 0.606 |
| 3.520 | 2.966 | 4.808 | 2.701 | 2.708 | 0.678 | 0.606 |
| 4.623 | 4.291 | 5.330 | 3.922 | 4.334 | 0.534 | 0.606 |
| 8.993 | 8.640 | 9.012 | 8.329 | 8.578 | 0.316 | 0.606 |
| 5.365 | 3.195 | 5.300 | 2.758 | 3.681 | 0.759 | 0.606 |
| 4.429 | 3.997 | 4.790 | 3.472 | 3.895 | 0.378 | 0.606 |
| 3.235 | 3.564 | 3.575 | 2.512 | 2.504 | 0.538 | 0.606 |
| 2.155 | 2.388 | 2.159 | 2.611 | 1.601 | 0.425 | 0.606 |
| 3.347 | 3.601 | 3.250 | 2.610 | 3.246 | 0.589 | 0.606 |
| 4.662 | 4.432 | 3.800 | 3.143 | 3.904 | 0.474 | 0.606 |
| 6.311 | 7.060 | 6.505 | 4.636 | 5.530 | 0.557 | 0.606 |
| 5.378 | 4.650 | 5.335 | 4.786 | 4.597 | 0.411 | 0.606 |
| 8.076 | 7.287 | 8.942 | 7.477 | 7.529 | 0.463 | 0.606 |
| 4.299 | 3.550 | 4.306 | 3.658 | 4.476 | 0.673 | 0.606 |
| 2.609 | 3.115 | 2.844 | 2.483 | 2.528 | 0.731 | 0.606 |
| 6.690 | 5.745 | 5.864 | 5.922 | 6.928 | 0.441 | 0.606 |
| 1.879 | 4.699 | 1.701 | 5.429 | 4.954 | 0.866 | 0.606 |
| 8.310 | 7.495 | 8.508 | 6.955 | 6.546 | 0.458 | 0.606 |
| 4.373 | 2.097 | 4.184 | 2.663 | 2.300 | 0.611 | 0.606 |
| 4.658 | 5.441 | 4.979 | 5.066 | 4.666 | 0.497 | 0.606 |
| 5.343 | 8.210 | 4.403 | 8.355 | 8.181 | 0.891 | 0.606 |
| 1.776 | 3.268 | 1.094 | 3.284 | 2.910 | 0.654 | 0.606 |
| 7.122 | 6.840 | 6.283 | 6.657 | 7.182 | 0.335 | 0.606 |
| 3.844 | 3.782 | 3.415 | 2.361 | 3.973 | 0.463 | 0.606 |

|       |       |       |       |       |       |       |
|-------|-------|-------|-------|-------|-------|-------|
| 2.297 | 2.242 | 3.122 | 2.177 | 1.936 | 0.426 | 0.606 |
| 1.930 | 2.745 | 2.391 | 3.141 | 3.090 | 0.511 | 0.606 |
| 4.022 | 4.284 | 4.442 | 3.440 | 4.480 | 0.388 | 0.606 |
| 7.930 | 8.065 | 7.124 | 8.265 | 8.348 | 0.380 | 0.606 |
| 4.681 | 3.521 | 5.815 | 3.665 | 3.370 | 0.535 | 0.606 |
| 3.788 | 4.010 | 3.528 | 4.306 | 3.897 | 0.459 | 0.606 |
| 3.379 | 4.116 | 4.333 | 2.664 | 3.057 | 0.615 | 0.606 |
| 5.597 | 6.150 | 3.538 | 6.804 | 6.456 | 0.659 | 0.606 |
| 7.696 | 7.358 | 8.364 | 6.407 | 6.478 | 0.465 | 0.606 |
| 3.483 | 3.762 | 3.723 | 4.197 | 4.185 | 0.387 | 0.606 |
| 2.896 | 3.196 | 1.863 | 3.874 | 3.024 | 0.501 | 0.606 |
| 4.216 | 5.720 | 3.858 | 5.618 | 5.600 | 0.591 | 0.606 |
| 1.728 | 2.005 | 2.102 | 1.795 | 2.087 | 0.428 | 0.606 |
| 6.263 | 7.018 | 3.138 | 7.289 | 7.192 | 0.909 | 0.606 |
| 4.476 | 5.910 | 2.884 | 6.077 | 5.849 | 0.696 | 0.606 |
| 5.390 | 4.891 | 6.036 | 5.042 | 4.814 | 0.464 | 0.606 |
| 7.342 | 7.645 | 6.810 | 6.330 | 6.418 | 0.485 | 0.606 |
| 5.503 | 5.056 | 5.834 | 3.934 | 4.277 | 0.477 | 0.606 |
| 7.114 | 7.052 | 6.814 | 6.675 | 6.838 | 0.399 | 0.606 |
| 4.958 | 6.453 | 3.695 | 6.734 | 6.761 | 0.647 | 0.606 |
| 5.277 | 4.764 | 5.957 | 4.414 | 4.717 | 0.465 | 0.606 |
| 5.000 | 4.748 | 4.557 | 4.954 | 5.139 | 0.394 | 0.606 |
| 3.740 | 3.399 | 3.207 | 2.772 | 2.822 | 0.441 | 0.606 |
| 5.152 | 2.275 | 4.256 | 2.029 | 2.952 | 0.769 | 0.606 |
| 5.508 | 6.161 | 4.734 | 5.799 | 5.914 | 0.377 | 0.606 |
| 1.179 | 3.638 | 1.261 | 2.789 | 3.003 | 0.589 | 0.606 |
| 4.771 | 3.444 | 4.369 | 3.567 | 3.917 | 0.528 | 0.606 |
| 1.640 | 3.050 | 1.646 | 3.004 | 3.385 | 0.485 | 0.606 |
| 5.070 | 4.716 | 5.528 | 5.050 | 5.417 | 0.336 | 0.606 |
| 6.093 | 6.252 | 5.773 | 5.935 | 6.340 | 0.382 | 0.606 |
| 4.745 | 5.181 | 4.160 | 5.248 | 4.975 | 0.445 | 0.606 |
| 2.676 | 3.625 | 2.950 | 3.950 | 4.202 | 0.479 | 0.606 |
| 5.925 | 5.980 | 2.536 | 6.479 | 6.331 | 0.952 | 0.606 |
| 7.341 | 7.996 | 5.214 | 8.387 | 8.300 | 0.744 | 0.606 |
| 5.443 | 5.921 | 3.188 | 6.498 | 6.191 | 0.616 | 0.606 |
| 5.042 | 5.930 | 2.813 | 6.707 | 6.208 | 0.914 | 0.606 |
| 2.266 | 2.765 | 1.825 | 2.777 | 3.515 | 0.625 | 0.606 |
| 5.422 | 6.656 | 5.812 | 6.992 | 6.788 | 0.477 | 0.606 |
| 4.563 | 5.476 | 4.236 | 5.600 | 5.693 | 0.483 | 0.606 |
| 3.566 | 4.491 | 2.000 | 5.111 | 5.116 | 0.623 | 0.606 |
| 4.017 | 5.150 | 3.129 | 5.031 | 5.658 | 0.582 | 0.606 |
| 5.166 | 7.101 | 4.002 | 7.535 | 7.351 | 0.814 | 0.606 |
| 5.017 | 4.918 | 1.355 | 5.973 | 5.245 | 0.896 | 0.606 |
| 4.428 | 5.538 | 2.250 | 5.892 | 5.776 | 0.857 | 0.606 |
| 5.874 | 7.577 | 2.371 | 8.227 | 8.034 | 1.250 | 0.606 |
| 5.221 | 4.460 | 2.727 | 5.363 | 4.479 | 0.586 | 0.606 |
| 3.491 | 3.591 | 3.843 | 3.175 | 2.750 | 0.548 | 0.606 |
| 7.627 | 7.563 | 5.684 | 7.991 | 7.785 | 0.559 | 0.606 |
| 6.706 | 7.488 | 6.916 | 8.003 | 7.879 | 0.563 | 0.606 |
| 1.682 | 2.571 | 2.618 | 3.658 | 2.852 | 0.533 | 0.606 |



|       |       |       |       |       |       |       |
|-------|-------|-------|-------|-------|-------|-------|
| 2.975 | 2.315 | 1.895 | 2.874 | 2.451 | 0.407 | 0.606 |
| 3.797 | 4.125 | 4.526 | 3.988 | 3.521 | 0.703 | 0.606 |
| 2.713 | 5.463 | 3.617 | 5.592 | 5.370 | 0.684 | 0.606 |
| 3.383 | 2.665 | 1.459 | 3.301 | 2.624 | 0.530 | 0.606 |
| 1.979 | 4.386 | 2.122 | 5.251 | 4.948 | 0.778 | 0.606 |
| 5.762 | 8.216 | 6.273 | 8.702 | 8.385 | 0.842 | 0.606 |
| 2.899 | 3.516 | 3.365 | 4.442 | 4.767 | 0.533 | 0.606 |
| 4.444 | 3.462 | 2.512 | 3.530 | 2.866 | 0.499 | 0.606 |
| 3.068 | 6.542 | 2.122 | 6.730 | 6.772 | 1.028 | 0.606 |
| 1.414 | 3.117 | 1.666 | 2.929 | 4.107 | 0.554 | 0.606 |
| 4.878 | 5.964 | 2.833 | 6.407 | 6.407 | 0.847 | 0.606 |
| 5.213 | 6.724 | 2.888 | 7.358 | 7.111 | 0.922 | 0.606 |
| 7.092 | 5.856 | 7.137 | 4.515 | 5.915 | 0.762 | 0.606 |
| 5.323 | 5.159 | 3.854 | 4.887 | 5.235 | 0.479 | 0.606 |
| 4.283 | 5.905 | 2.997 | 5.987 | 5.919 | 0.682 | 0.606 |
| 5.137 | 6.369 | 5.391 | 7.387 | 6.718 | 0.583 | 0.606 |
| 4.811 | 5.895 | 3.043 | 6.448 | 6.287 | 0.875 | 0.606 |
| 4.819 | 5.719 | 3.549 | 6.837 | 6.552 | 0.944 | 0.606 |
| 9.217 | 7.457 | 8.837 | 7.796 | 7.533 | 0.530 | 0.606 |
| 3.105 | 4.174 | 3.047 | 4.179 | 3.980 | 0.420 | 0.606 |
| 2.262 | 3.178 | 2.435 | 2.880 | 2.686 | 0.391 | 0.606 |
| 6.748 | 4.413 | 3.054 | 4.648 | 5.105 | 0.852 | 0.606 |
| 7.068 | 6.150 | 7.903 | 5.838 | 5.971 | 0.484 | 0.606 |
| 5.133 | 3.951 | 6.146 | 4.140 | 3.905 | 0.612 | 0.606 |
| 6.025 | 7.651 | 4.778 | 8.013 | 7.990 | 0.747 | 0.606 |
| 2.379 | 6.514 | 2.606 | 6.441 | 5.873 | 0.946 | 0.606 |
| 2.892 | 2.247 | 2.531 | 2.328 | 2.454 | 0.449 | 0.606 |
| 4.513 | 6.633 | 1.651 | 7.469 | 7.003 | 1.150 | 0.606 |
| 2.258 | 3.073 | 2.866 | 3.073 | 3.000 | 0.464 | 0.606 |
| 5.874 | 7.290 | 5.885 | 7.256 | 7.181 | 0.488 | 0.606 |
| 3.786 | 4.155 | 3.009 | 4.678 | 4.247 | 0.434 | 0.606 |
| 3.238 | 4.066 | 2.620 | 3.794 | 3.211 | 0.486 | 0.606 |
| 1.716 | 2.238 | 2.709 | 1.675 | 2.099 | 0.425 | 0.606 |
| 2.664 | 2.198 | 2.421 | 2.929 | 2.321 | 0.402 | 0.606 |
| 3.353 | 3.816 | 2.818 | 4.102 | 4.636 | 0.480 | 0.606 |
| 6.412 | 5.252 | 3.280 | 5.934 | 5.342 | 0.672 | 0.606 |
| 2.623 | 3.693 | 2.711 | 3.235 | 3.990 | 0.420 | 0.606 |
| 3.840 | 3.630 | 4.157 | 3.127 | 2.948 | 0.405 | 0.606 |
| 4.478 | 3.892 | 2.613 | 4.658 | 4.689 | 0.593 | 0.606 |
| 5.924 | 7.069 | 4.998 | 7.439 | 7.434 | 0.604 | 0.606 |
| 3.141 | 3.098 | 3.303 | 2.522 | 3.105 | 0.435 | 0.606 |
| 3.601 | 4.089 | 3.327 | 4.619 | 4.503 | 0.392 | 0.606 |
| 5.554 | 7.493 | 8.404 | 6.696 | 6.197 | 0.589 | 0.606 |
| 4.648 | 6.292 | 3.520 | 6.453 | 6.213 | 0.746 | 0.606 |
| 6.988 | 5.974 | 6.886 | 6.405 | 6.344 | 0.542 | 0.606 |
| 2.613 | 2.488 | 3.430 | 3.501 | 3.095 | 0.426 | 0.606 |
| 3.300 | 2.556 | 3.042 | 2.975 | 2.726 | 0.423 | 0.606 |
| 3.293 | 2.104 | 2.694 | 1.971 | 2.666 | 0.534 | 0.606 |
| 5.089 | 3.180 | 5.544 | 2.759 | 2.484 | 0.719 | 0.606 |
| 4.688 | 6.083 | 3.132 | 6.415 | 6.144 | 0.714 | 0.606 |

|       |       |       |       |       |       |       |
|-------|-------|-------|-------|-------|-------|-------|
| 4.198 | 5.768 | 1.942 | 6.240 | 5.772 | 0.993 | 0.606 |
| 6.387 | 7.474 | 4.463 | 7.875 | 7.834 | 0.678 | 0.606 |
| 3.031 | 5.991 | 2.318 | 6.610 | 6.659 | 0.971 | 0.606 |
| 2.097 | 3.961 | 1.490 | 4.563 | 4.807 | 0.754 | 0.606 |
| 2.401 | 5.487 | 2.287 | 6.426 | 6.271 | 0.977 | 0.606 |
| 3.214 | 5.828 | 2.510 | 6.164 | 5.930 | 0.919 | 0.606 |
| 4.663 | 6.609 | 2.552 | 6.566 | 6.392 | 0.869 | 0.606 |
| 4.416 | 5.131 | 4.001 | 5.658 | 5.718 | 0.617 | 0.606 |
| 1.535 | 6.294 | 1.502 | 6.486 | 6.117 | 1.205 | 0.606 |
| 4.446 | 6.115 | 4.720 | 6.575 | 6.446 | 0.535 | 0.606 |
| 4.270 | 4.065 | 4.439 | 3.768 | 4.002 | 0.375 | 0.606 |
| 6.899 | 7.031 | 7.415 | 6.102 | 7.045 | 0.374 | 0.606 |
| 4.497 | 6.860 | 3.657 | 7.461 | 7.049 | 0.934 | 0.606 |
| 7.550 | 7.412 | 7.819 | 6.519 | 6.980 | 0.375 | 0.606 |
| 3.944 | 3.896 | 4.989 | 4.627 | 4.749 | 0.429 | 0.606 |
| 3.938 | 4.271 | 5.249 | 4.756 | 4.379 | 0.473 | 0.606 |
| 5.669 | 5.482 | 6.291 | 5.557 | 5.852 | 1.830 | 0.606 |
| 5.857 | 5.521 | 6.521 | 5.288 | 5.216 | 0.461 | 0.606 |
| 4.771 | 4.470 | 4.028 | 4.684 | 6.224 | 0.684 | 0.606 |
| 5.196 | 4.601 | 5.762 | 2.957 | 3.708 | 0.626 | 0.606 |
| 4.704 | 4.704 | 1.429 | 5.191 | 5.781 | 1.083 | 0.606 |
| 5.400 | 5.080 | 4.499 | 6.055 | 6.075 | 0.605 | 0.606 |
| 5.498 | 6.594 | 5.246 | 7.401 | 7.089 | 0.674 | 0.606 |
| 4.874 | 6.401 | 5.710 | 7.301 | 6.784 | 0.539 | 0.606 |
| 4.573 | 4.294 | 5.434 | 4.306 | 4.742 | 0.379 | 0.606 |
| 3.336 | 4.609 | 3.553 | 3.758 | 3.879 | 0.572 | 0.606 |
| 4.730 | 4.334 | 3.856 | 4.194 | 4.291 | 0.360 | 0.606 |
| 4.757 | 4.635 | 5.221 | 4.521 | 4.401 | 0.378 | 0.606 |
| 5.138 | 5.591 | 3.223 | 5.951 | 6.166 | 0.742 | 0.606 |
| 6.966 | 6.719 | 7.767 | 5.956 | 6.254 | 0.410 | 0.606 |
| 8.036 | 8.246 | 7.608 | 8.525 | 8.484 | 0.313 | 0.606 |
| 7.726 | 8.507 | 5.695 | 8.875 | 8.549 | 0.657 | 0.606 |
| 5.973 | 6.255 | 5.138 | 6.852 | 6.654 | 0.410 | 0.606 |
| 4.894 | 3.774 | 5.042 | 4.096 | 3.949 | 0.441 | 0.606 |
| 5.061 | 5.311 | 4.467 | 5.996 | 6.170 | 0.507 | 0.606 |
| 3.734 | 4.098 | 3.187 | 4.822 | 4.477 | 0.421 | 0.606 |
| 3.940 | 4.307 | 4.545 | 4.526 | 4.518 | 0.441 | 0.606 |
| 6.088 | 4.040 | 3.532 | 4.919 | 4.491 | 0.529 | 0.606 |
| 6.602 | 7.815 | 3.621 | 8.165 | 7.627 | 0.927 | 0.606 |
| 7.858 | 8.908 | 7.862 | 9.020 | 8.932 | 0.435 | 0.606 |
| 6.161 | 5.627 | 6.481 | 6.281 | 6.008 | 0.489 | 0.606 |
| 2.742 | 6.715 | 2.710 | 6.848 | 6.304 | 1.029 | 0.606 |
| 4.892 | 5.645 | 3.418 | 5.998 | 5.835 | 0.586 | 0.606 |
| 7.807 | 8.209 | 8.120 | 8.447 | 8.373 | 0.354 | 0.606 |
| 5.691 | 6.279 | 4.239 | 6.575 | 6.392 | 0.626 | 0.606 |
| 7.664 | 6.904 | 8.758 | 6.895 | 6.629 | 0.481 | 0.606 |
| 6.762 | 7.261 | 5.561 | 7.594 | 7.337 | 0.519 | 0.606 |
| 4.659 | 3.984 | 4.240 | 3.406 | 4.092 | 0.422 | 0.606 |
| 3.950 | 4.270 | 3.058 | 4.673 | 4.589 | 0.412 | 0.606 |
| 4.957 | 5.679 | 4.758 | 6.144 | 5.916 | 0.472 | 0.606 |

|       |        |       |        |        |       |       |
|-------|--------|-------|--------|--------|-------|-------|
| 6.265 | 7.464  | 5.109 | 7.444  | 7.399  | 0.545 | 0.606 |
| 6.916 | 6.929  | 6.777 | 7.292  | 7.053  | 0.298 | 0.606 |
| 2.506 | 2.948  | 1.992 | 3.670  | 3.459  | 0.455 | 0.606 |
| 3.127 | 3.315  | 1.736 | 3.005  | 3.470  | 0.500 | 0.606 |
| 5.314 | 5.966  | 4.499 | 6.835  | 6.333  | 0.556 | 0.606 |
| 6.177 | 8.327  | 3.241 | 8.570  | 8.138  | 1.006 | 0.606 |
| 6.340 | 6.725  | 6.142 | 7.026  | 7.213  | 0.398 | 0.606 |
| 8.754 | 7.925  | 9.277 | 7.245  | 7.626  | 0.458 | 0.606 |
| 3.205 | 3.314  | 4.346 | 2.842  | 3.187  | 0.448 | 0.606 |
| 4.375 | 5.702  | 2.233 | 6.131  | 5.486  | 0.741 | 0.606 |
| 4.120 | 4.769  | 3.446 | 4.940  | 4.854  | 0.398 | 0.606 |
| 1.703 | 1.966  | 1.428 | 2.420  | 2.541  | 0.416 | 0.606 |
| 5.632 | 4.178  | 6.304 | 3.566  | 3.517  | 0.636 | 0.606 |
| 3.690 | 3.986  | 3.165 | 4.802  | 4.399  | 0.420 | 0.606 |
| 6.488 | 5.613  | 7.224 | 5.966  | 5.518  | 0.433 | 0.606 |
| 5.685 | 6.684  | 3.246 | 7.098  | 6.800  | 0.803 | 0.606 |
| 7.902 | 6.544  | 8.647 | 6.049  | 6.140  | 0.555 | 0.606 |
| 2.393 | 4.106  | 2.064 | 3.958  | 3.977  | 0.512 | 0.606 |
| 3.379 | 4.891  | 5.052 | 3.355  | 3.225  | 0.576 | 0.606 |
| 8.148 | 7.288  | 8.869 | 6.753  | 6.798  | 0.506 | 0.606 |
| 8.464 | 7.566  | 7.030 | 7.981  | 8.111  | 0.405 | 0.606 |
| 5.404 | 6.017  | 4.841 | 6.677  | 6.009  | 0.499 | 0.606 |
| 8.578 | 8.509  | 7.565 | 8.863  | 8.748  | 0.431 | 0.606 |
| 6.793 | 7.706  | 6.749 | 7.763  | 8.033  | 0.389 | 0.606 |
| 7.608 | 8.001  | 5.616 | 7.979  | 7.806  | 0.590 | 0.606 |
| 3.130 | 3.286  | 3.005 | 4.197  | 2.974  | 0.473 | 0.606 |
| 2.116 | 3.144  | 2.721 | 2.761  | 3.151  | 0.420 | 0.606 |
| 9.860 | 10.825 | 8.215 | 11.106 | 10.822 | 0.701 | 0.606 |
| 9.227 | 8.713  | 9.935 | 8.554  | 8.660  | 0.341 | 0.606 |
| 9.111 | 9.307  | 9.380 | 9.531  | 9.204  | 0.306 | 0.606 |
| 4.145 | 3.431  | 5.462 | 3.451  | 2.939  | 0.544 | 0.606 |
| 8.909 | 8.945  | 8.058 | 9.292  | 9.442  | 0.407 | 0.606 |
| 3.179 | 4.962  | 3.454 | 5.225  | 4.698  | 0.564 | 0.606 |
| 1.762 | 1.846  | 2.113 | 2.113  | 1.968  | 0.422 | 0.606 |
| 5.604 | 5.924  | 6.398 | 6.337  | 5.714  | 0.457 | 0.606 |
| 5.680 | 6.535  | 5.907 | 7.124  | 7.201  | 0.493 | 0.606 |
| 4.172 | 6.694  | 5.334 | 7.134  | 7.295  | 0.675 | 0.606 |
| 2.401 | 2.747  | 1.718 | 3.085  | 3.200  | 0.453 | 0.606 |
| 2.993 | 3.126  | 4.009 | 3.261  | 3.097  | 0.480 | 0.606 |
| 6.242 | 6.639  | 5.070 | 6.752  | 6.818  | 0.482 | 0.606 |
| 4.459 | 5.089  | 5.254 | 5.390  | 5.095  | 0.399 | 0.606 |
| 6.731 | 6.559  | 6.131 | 7.323  | 7.390  | 0.361 | 0.606 |
| 4.964 | 4.533  | 5.859 | 4.181  | 3.871  | 0.522 | 0.606 |
| 6.432 | 5.102  | 4.561 | 4.685  | 4.859  | 0.696 | 0.606 |
| 6.020 | 5.543  | 6.784 | 5.080  | 5.711  | 0.376 | 0.606 |
| 3.842 | 2.504  | 2.747 | 2.279  | 2.976  | 0.529 | 0.606 |
| 6.966 | 6.541  | 6.718 | 6.237  | 6.322  | 0.339 | 0.606 |
| 5.857 | 4.537  | 5.767 | 4.160  | 3.848  | 0.575 | 0.606 |
| 3.301 | 3.128  | 1.986 | 3.876  | 3.782  | 0.490 | 0.606 |
| 6.122 | 7.152  | 7.256 | 7.196  | 6.730  | 0.452 | 0.606 |

|       |       |        |       |       |       |       |
|-------|-------|--------|-------|-------|-------|-------|
| 7.537 | 8.591 | 7.179  | 8.578 | 8.616 | 0.424 | 0.606 |
| 4.447 | 3.493 | 2.378  | 3.078 | 3.275 | 0.508 | 0.606 |
| 4.704 | 5.261 | 3.161  | 4.747 | 5.290 | 0.483 | 0.606 |
| 5.926 | 3.102 | 2.105  | 2.885 | 3.325 | 0.871 | 0.606 |
| 6.222 | 6.556 | 5.842  | 7.054 | 6.780 | 0.351 | 0.606 |
| 4.032 | 2.988 | 2.064  | 3.510 | 3.067 | 0.423 | 0.606 |
| 4.917 | 4.929 | 5.412  | 5.605 | 5.667 | 0.371 | 0.606 |
| 4.861 | 5.970 | 5.434  | 6.195 | 5.743 | 0.381 | 0.606 |
| 6.956 | 7.852 | 8.090  | 8.105 | 7.750 | 0.351 | 0.606 |
| 4.104 | 5.051 | 3.223  | 5.491 | 4.993 | 0.589 | 0.606 |
| 6.096 | 6.293 | 8.259  | 6.143 | 6.011 | 0.507 | 0.606 |
| 5.137 | 4.949 | 5.367  | 5.168 | 5.260 | 0.301 | 0.606 |
| 4.194 | 3.888 | 3.507  | 4.038 | 4.391 | 0.580 | 0.606 |
| 3.461 | 3.264 | 4.349  | 2.679 | 2.598 | 0.657 | 0.606 |
| 2.877 | 1.961 | 2.891  | 2.815 | 2.735 | 0.422 | 0.606 |
| 3.031 | 4.194 | 3.366  | 3.460 | 3.285 | 0.474 | 0.606 |
| 9.963 | 8.061 | 10.540 | 6.410 | 6.574 | 0.939 | 0.606 |
| 5.478 | 6.171 | 3.458  | 6.290 | 5.564 | 0.767 | 0.606 |
| 3.371 | 2.933 | 3.074  | 3.109 | 2.786 | 0.451 | 0.606 |
| 3.556 | 2.582 | 3.704  | 1.437 | 1.603 | 0.612 | 0.606 |
| 5.517 | 5.457 | 3.724  | 5.426 | 5.315 | 0.555 | 0.606 |
| 0.752 | 2.537 | 1.099  | 3.142 | 2.914 | 0.628 | 0.606 |
| 3.944 | 5.084 | 4.075  | 4.338 | 4.418 | 0.375 | 0.606 |
| 6.734 | 7.141 | 6.449  | 7.484 | 7.063 | 0.367 | 0.606 |
| 6.079 | 6.474 | 6.182  | 6.717 | 6.771 | 0.345 | 0.606 |
| 4.920 | 5.276 | 4.586  | 5.774 | 5.875 | 0.354 | 0.606 |
| 5.887 | 6.395 | 5.902  | 6.425 | 6.759 | 0.317 | 0.606 |
| 1.859 | 2.272 | 2.272  | 1.948 | 1.975 | 0.506 | 0.606 |
| 3.437 | 3.628 | 3.557  | 3.928 | 3.934 | 0.452 | 0.606 |
| 2.487 | 2.367 | 1.547  | 2.534 | 2.210 | 0.558 | 0.606 |
| 3.378 | 2.727 | 3.016  | 3.009 | 3.429 | 0.572 | 0.606 |
| 6.144 | 6.159 | 3.153  | 7.148 | 7.207 | 0.905 | 0.606 |
| 1.965 | 1.991 | 1.307  | 1.272 | 1.456 | 0.517 | 0.606 |
| 3.964 | 3.483 | 3.180  | 3.716 | 3.716 | 0.397 | 0.606 |
| 4.057 | 2.807 | 2.865  | 2.946 | 3.375 | 0.494 | 0.606 |
| 3.537 | 4.109 | 2.942  | 4.015 | 4.346 | 0.489 | 0.606 |
| 2.398 | 2.390 | 2.177  | 2.590 | 1.983 | 0.427 | 0.606 |
| 3.758 | 3.798 | 4.311  | 3.557 | 3.699 | 0.311 | 0.606 |
| 6.100 | 6.590 | 4.537  | 6.662 | 6.741 | 0.587 | 0.606 |
| 2.398 | 2.688 | 2.375  | 2.072 | 1.802 | 0.537 | 0.606 |
| 6.452 | 6.888 | 2.666  | 7.310 | 6.968 | 0.958 | 0.606 |
| 3.180 | 3.567 | 3.492  | 3.624 | 4.245 | 0.397 | 0.606 |
| 5.303 | 5.386 | 5.933  | 5.553 | 5.146 | 0.351 | 0.606 |
| 2.053 | 2.715 | 1.647  | 2.203 | 2.219 | 0.472 | 0.606 |
| 3.390 | 2.333 | 4.461  | 1.728 | 2.171 | 0.655 | 0.606 |
| 5.598 | 6.939 | 7.776  | 5.205 | 4.991 | 0.639 | 0.606 |
| 3.123 | 4.533 | 4.814  | 3.046 | 3.179 | 0.636 | 0.606 |
| 4.447 | 3.290 | 4.283  | 3.564 | 3.696 | 0.409 | 0.606 |
| 2.893 | 4.594 | 2.374  | 5.023 | 4.966 | 0.710 | 0.606 |
| 5.444 | 4.795 | 4.818  | 4.747 | 5.073 | 0.330 | 0.606 |

|       |       |       |       |       |       |       |
|-------|-------|-------|-------|-------|-------|-------|
| 1.875 | 2.671 | 3.088 | 3.349 | 3.785 | 0.528 | 0.606 |
| 5.058 | 4.865 | 4.880 | 5.247 | 5.406 | 0.376 | 0.606 |
| 2.741 | 3.032 | 2.237 | 1.764 | 2.946 | 0.410 | 0.606 |
| 8.042 | 7.494 | 8.602 | 6.970 | 7.327 | 0.375 | 0.606 |
| 8.757 | 8.611 | 9.662 | 7.773 | 8.105 | 0.420 | 0.606 |
| 9.094 | 7.940 | 4.128 | 8.665 | 8.331 | 1.194 | 0.606 |
| 5.884 | 6.226 | 5.733 | 6.721 | 6.494 | 0.376 | 0.606 |
| 6.596 | 6.785 | 6.719 | 7.370 | 7.122 | 0.351 | 0.606 |
| 3.174 | 3.097 | 2.720 | 4.110 | 3.283 | 0.412 | 0.606 |
| 5.724 | 5.553 | 5.987 | 4.736 | 5.710 | 0.421 | 0.606 |
| 8.239 | 9.379 | 9.607 | 6.638 | 7.880 | 0.803 | 0.606 |
| 5.371 | 6.213 | 4.742 | 6.695 | 6.178 | 0.443 | 0.606 |
| 5.417 | 4.299 | 5.211 | 4.285 | 4.389 | 0.436 | 0.606 |
| 5.022 | 4.847 | 5.244 | 4.641 | 4.514 | 0.386 | 0.606 |
| 4.919 | 4.389 | 5.259 | 4.352 | 4.644 | 0.355 | 0.606 |
| 4.634 | 3.713 | 5.074 | 2.806 | 3.665 | 0.459 | 0.606 |
| 1.752 | 2.395 | 2.636 | 2.584 | 1.422 | 0.451 | 0.606 |
| 5.004 | 4.944 | 5.114 | 4.987 | 4.664 | 0.375 | 0.606 |
| 2.060 | 2.694 | 2.543 | 2.364 | 2.492 | 0.455 | 0.606 |
| 2.032 | 3.247 | 2.566 | 3.939 | 2.480 | 0.640 | 0.606 |
| 4.752 | 5.001 | 4.617 | 5.316 | 5.490 | 0.339 | 0.606 |
| 3.120 | 3.011 | 3.262 | 3.048 | 3.028 | 0.405 | 0.606 |
| 5.862 | 6.617 | 6.648 | 5.124 | 5.842 | 0.587 | 0.606 |
| 6.102 | 6.195 | 5.915 | 5.935 | 6.352 | 0.383 | 0.606 |
| 2.825 | 2.256 | 2.581 | 1.830 | 2.332 | 0.579 | 0.606 |
| 3.399 | 5.674 | 3.910 | 6.538 | 6.691 | 0.725 | 0.606 |
| 4.891 | 4.093 | 5.741 | 2.779 | 2.811 | 0.825 | 0.606 |
| 4.673 | 5.267 | 4.539 | 5.520 | 5.045 | 0.452 | 0.606 |
| 6.755 | 5.320 | 5.548 | 4.827 | 5.500 | 0.531 | 0.606 |
| 2.053 | 2.390 | 2.053 | 1.343 | 1.785 | 0.399 | 0.606 |
| 6.335 | 5.307 | 6.160 | 4.434 | 5.123 | 0.434 | 0.606 |
| 2.913 | 1.552 | 2.200 | 2.238 | 1.738 | 0.453 | 0.606 |
| 5.564 | 3.921 | 5.998 | 3.020 | 3.674 | 0.654 | 0.606 |
| 6.973 | 7.211 | 7.064 | 7.293 | 6.948 | 0.342 | 0.606 |
| 7.391 | 6.512 | 7.541 | 6.278 | 6.174 | 0.433 | 0.606 |
| 3.924 | 3.334 | 4.533 | 3.193 | 2.968 | 0.487 | 0.606 |
| 4.685 | 5.341 | 4.282 | 4.610 | 4.714 | 0.401 | 0.606 |
| 3.562 | 3.223 | 3.487 | 2.924 | 3.107 | 0.401 | 0.606 |
| 6.359 | 5.461 | 5.667 | 5.312 | 4.929 | 0.387 | 0.606 |
| 1.827 | 3.396 | 2.402 | 2.806 | 3.262 | 0.469 | 0.606 |
| 7.271 | 6.479 | 7.136 | 4.922 | 4.922 | 0.633 | 0.606 |
| 4.341 | 4.345 | 4.402 | 3.733 | 4.502 | 0.519 | 0.606 |
| 2.699 | 2.680 | 3.411 | 2.288 | 1.974 | 0.504 | 0.606 |
| 6.576 | 7.222 | 6.097 | 7.890 | 7.654 | 0.474 | 0.606 |
| 7.683 | 8.103 | 6.709 | 8.794 | 8.587 | 0.549 | 0.606 |
| 5.991 | 5.332 | 3.692 | 5.402 | 5.672 | 0.590 | 0.606 |
| 5.825 | 6.784 | 5.981 | 6.327 | 6.570 | 0.444 | 0.606 |
| 6.071 | 4.990 | 6.583 | 5.667 | 6.145 | 0.465 | 0.606 |
| 6.531 | 6.149 | 8.674 | 4.458 | 4.453 | 0.903 | 0.606 |
| 5.105 | 1.992 | 2.463 | 2.343 | 2.581 | 0.707 | 0.606 |

|       |       |       |       |       |       |       |
|-------|-------|-------|-------|-------|-------|-------|
| 2.997 | 3.486 | 3.386 | 3.575 | 3.881 | 0.389 | 0.606 |
| 3.597 | 3.850 | 3.896 | 3.253 | 3.666 | 0.412 | 0.606 |
| 4.813 | 5.436 | 2.768 | 5.303 | 5.075 | 0.574 | 0.606 |
| 3.500 | 3.939 | 2.641 | 4.891 | 4.520 | 0.519 | 0.606 |
| 5.999 | 5.517 | 6.591 | 5.634 | 6.038 | 0.365 | 0.606 |
| 2.951 | 6.522 | 5.750 | 6.894 | 7.405 | 1.113 | 0.606 |
| 2.641 | 2.056 | 2.625 | 3.205 | 2.752 | 0.489 | 0.606 |
| 3.324 | 3.453 | 3.873 | 3.491 | 3.122 | 0.433 | 0.606 |
| 1.871 | 3.760 | 2.283 | 4.176 | 4.256 | 0.551 | 0.606 |
| 5.100 | 5.250 | 5.490 | 4.726 | 5.691 | 0.356 | 0.606 |
| 7.275 | 6.928 | 8.505 | 6.955 | 7.049 | 0.454 | 0.606 |
| 2.419 | 3.428 | 3.100 | 1.986 | 2.754 | 0.587 | 0.606 |
| 4.083 | 3.268 | 1.930 | 2.234 | 2.696 | 0.518 | 0.606 |
| 3.741 | 2.781 | 5.095 | 1.783 | 2.613 | 0.763 | 0.606 |
| 1.742 | 2.957 | 2.019 | 1.861 | 2.551 | 0.659 | 0.606 |
| 2.956 | 2.922 | 2.956 | 2.084 | 2.346 | 0.559 | 0.606 |
| 3.711 | 3.310 | 4.241 | 2.721 | 3.685 | 0.472 | 0.606 |
| 4.983 | 4.500 | 5.228 | 3.977 | 4.371 | 0.390 | 0.606 |
| 2.331 | 3.092 | 3.281 | 2.331 | 2.912 | 0.558 | 0.606 |
| 6.737 | 6.204 | 3.766 | 6.266 | 6.321 | 0.626 | 0.606 |
| 5.094 | 5.327 | 5.642 | 4.097 | 4.095 | 0.489 | 0.606 |
| 3.052 | 2.762 | 2.536 | 2.332 | 2.721 | 0.419 | 0.606 |
| 3.759 | 4.646 | 4.033 | 3.432 | 3.724 | 0.429 | 0.606 |
| 3.375 | 4.660 | 2.840 | 5.427 | 5.308 | 0.565 | 0.606 |
| 3.820 | 2.904 | 4.244 | 2.968 | 2.831 | 0.554 | 0.606 |
| 4.795 | 5.333 | 3.672 | 5.743 | 5.441 | 0.598 | 0.606 |
| 6.521 | 6.080 | 3.252 | 6.888 | 6.590 | 0.844 | 0.606 |
| 5.362 | 6.003 | 4.802 | 5.916 | 5.988 | 0.386 | 0.606 |
| 3.800 | 3.625 | 3.585 | 3.350 | 3.554 | 0.472 | 0.606 |
| 1.976 | 3.834 | 3.462 | 3.619 | 2.356 | 0.618 | 0.606 |
| 4.611 | 3.866 | 2.700 | 4.241 | 4.263 | 0.462 | 0.606 |
| 4.122 | 3.702 | 3.490 | 3.057 | 3.955 | 0.417 | 0.606 |
| 3.597 | 2.626 | 2.382 | 2.165 | 3.898 | 0.782 | 0.606 |
| 2.042 | 2.534 | 1.182 | 1.892 | 2.382 | 0.522 | 0.606 |
| 4.082 | 3.765 | 3.652 | 4.401 | 4.538 | 0.362 | 0.606 |
| 6.821 | 6.913 | 6.411 | 7.204 | 6.939 | 0.380 | 0.606 |
| 2.593 | 2.410 | 2.085 | 3.326 | 2.558 | 0.465 | 0.606 |
| 3.044 | 2.474 | 2.909 | 2.785 | 2.802 | 0.428 | 0.606 |
| 2.318 | 2.764 | 3.183 | 2.853 | 2.629 | 0.451 | 0.606 |
| 5.109 | 4.607 | 6.606 | 3.822 | 4.098 | 0.570 | 0.606 |
| 3.256 | 0.906 | 1.757 | 0.845 | 0.756 | 0.849 | 0.606 |
| 1.073 | 2.546 | 1.269 | 1.590 | 1.488 | 0.490 | 0.606 |
| 3.470 | 1.591 | 2.054 | 1.990 | 1.336 | 1.072 | 0.606 |
| 2.462 | 3.218 | 3.695 | 2.384 | 3.130 | 0.440 | 0.606 |
| 3.911 | 3.257 | 4.947 | 2.440 | 2.791 | 0.570 | 0.606 |
| 4.079 | 2.448 | 3.641 | 2.442 | 2.601 | 0.586 | 0.606 |
| 1.570 | 2.847 | 1.663 | 4.989 | 3.675 | 0.713 | 0.606 |
| 2.466 | 1.671 | 3.636 | 2.243 | 2.310 | 0.507 | 0.606 |
| 3.509 | 6.049 | 3.729 | 6.152 | 6.422 | 0.717 | 0.606 |
| 1.174 | 2.383 | 0.915 | 2.440 | 2.298 | 0.452 | 0.606 |

|       |       |       |       |       |       |       |
|-------|-------|-------|-------|-------|-------|-------|
| 2.336 | 1.118 | 1.719 | 1.846 | 1.886 | 0.481 | 0.606 |
| 2.079 | 1.257 | 1.363 | 3.557 | 3.210 | 0.586 | 0.606 |
| 5.145 | 5.617 | 5.759 | 5.860 | 6.286 | 0.412 | 0.606 |
| 3.398 | 3.147 | 4.196 | 3.051 | 3.297 | 0.392 | 0.606 |
| 3.964 | 4.252 | 4.373 | 3.581 | 4.492 | 0.440 | 0.606 |
| 4.319 | 3.267 | 4.451 | 4.137 | 3.862 | 0.461 | 0.606 |
| 2.098 | 3.031 | 1.823 | 2.942 | 2.793 | 0.439 | 0.606 |
| 3.468 | 3.251 | 4.041 | 3.427 | 3.735 | 0.710 | 0.606 |
| 3.713 | 2.632 | 3.346 | 2.898 | 2.772 | 0.464 | 0.606 |
| 2.026 | 2.365 | 2.293 | 2.267 | 2.807 | 0.442 | 0.606 |
| 4.263 | 3.435 | 1.927 | 4.075 | 5.141 | 1.101 | 0.606 |
| 2.859 | 3.426 | 3.522 | 2.812 | 3.675 | 0.438 | 0.606 |
| 0.994 | 5.424 | 1.042 | 5.985 | 6.281 | 1.222 | 0.606 |
| 2.824 | 2.798 | 3.888 | 3.023 | 4.036 | 0.435 | 0.606 |
| 2.587 | 2.594 | 3.595 | 1.906 | 2.428 | 0.425 | 0.606 |
| 3.689 | 3.004 | 2.818 | 2.827 | 2.930 | 0.457 | 0.606 |
| 2.299 | 3.665 | 2.241 | 2.817 | 4.043 | 0.528 | 0.606 |
| 5.267 | 5.720 | 2.965 | 6.013 | 5.892 | 0.700 | 0.606 |
| 3.619 | 4.922 | 1.712 | 5.159 | 4.806 | 0.860 | 0.606 |
| 4.570 | 5.239 | 3.139 | 5.757 | 4.996 | 0.637 | 0.606 |
| 5.385 | 4.022 | 6.159 | 3.698 | 3.116 | 0.819 | 0.606 |
| 5.529 | 3.258 | 6.384 | 2.261 | 1.832 | 0.986 | 0.606 |
| 2.230 | 2.754 | 2.263 | 4.091 | 3.498 | 0.661 | 0.606 |
| 1.947 | 4.082 | 1.854 | 4.138 | 2.866 | 0.602 | 0.606 |
| 5.617 | 5.740 | 3.094 | 7.084 | 6.466 | 0.955 | 0.606 |
| 5.895 | 5.707 | 5.489 | 6.068 | 6.142 | 0.311 | 0.606 |
| 6.663 | 5.623 | 5.864 | 6.653 | 6.444 | 0.569 | 0.606 |
| 2.866 | 1.613 | 2.596 | 1.219 | 2.868 | 0.620 | 0.606 |
| 5.365 | 3.541 | 5.824 | 1.637 | 1.868 | 0.957 | 0.606 |
| 7.417 | 7.440 | 7.395 | 7.813 | 7.856 | 0.357 | 0.606 |
| 2.119 | 3.244 | 1.990 | 3.517 | 3.479 | 0.439 | 0.606 |
| 3.573 | 3.929 | 3.496 | 4.628 | 4.658 | 0.388 | 0.606 |
| 2.540 | 3.741 | 3.587 | 3.646 | 3.580 | 0.441 | 0.606 |
| 4.870 | 5.481 | 5.470 | 5.649 | 5.706 | 0.364 | 0.606 |
| 1.845 | 1.565 | 1.808 | 1.670 | 1.307 | 0.444 | 0.606 |
| 2.771 | 2.483 | 2.929 | 2.845 | 2.445 | 0.405 | 0.606 |
| 4.913 | 3.690 | 4.142 | 4.383 | 4.455 | 0.420 | 0.606 |
| 3.417 | 2.302 | 4.868 | 2.897 | 2.648 | 0.792 | 0.606 |
| 4.239 | 4.523 | 2.683 | 4.561 | 4.664 | 0.609 | 0.606 |
| 3.782 | 3.076 | 3.742 | 3.218 | 3.430 | 0.564 | 0.606 |
| 3.070 | 2.294 | 4.663 | 1.894 | 1.875 | 0.580 | 0.606 |
| 2.459 | 2.784 | 2.470 | 2.056 | 1.776 | 0.428 | 0.606 |
| 4.348 | 3.785 | 4.723 | 4.319 | 4.557 | 0.340 | 0.606 |
| 5.407 | 4.774 | 5.913 | 4.852 | 4.904 | 0.432 | 0.606 |
| 3.952 | 4.072 | 2.872 | 4.363 | 3.871 | 0.442 | 0.606 |
| 2.746 | 1.828 | 1.436 | 1.884 | 1.984 | 0.447 | 0.606 |
| 7.507 | 7.246 | 7.352 | 7.139 | 6.967 | 0.353 | 0.606 |
| 4.140 | 4.140 | 4.847 | 4.895 | 4.447 | 0.408 | 0.606 |
| 3.279 | 5.595 | 1.613 | 5.229 | 5.963 | 0.884 | 0.606 |
| 2.462 | 3.175 | 3.175 | 2.562 | 3.163 | 0.479 | 0.606 |

|       |       |       |       |       |       |       |
|-------|-------|-------|-------|-------|-------|-------|
| 3.370 | 1.990 | 4.390 | 1.674 | 2.890 | 0.569 | 0.606 |
| 3.237 | 2.572 | 4.389 | 1.896 | 2.730 | 0.638 | 0.606 |
| 2.909 | 4.874 | 3.554 | 5.006 | 5.209 | 0.592 | 0.606 |
| 4.560 | 5.428 | 4.513 | 5.503 | 5.737 | 0.415 | 0.606 |
| 2.361 | 3.171 | 1.643 | 3.484 | 3.090 | 0.476 | 0.606 |
| 5.498 | 5.662 | 6.081 | 5.683 | 5.464 | 0.320 | 0.606 |
| 4.439 | 4.439 | 4.668 | 4.428 | 4.407 | 0.442 | 0.606 |
| 3.983 | 4.197 | 3.406 | 3.655 | 3.687 | 0.457 | 0.606 |
| 4.966 | 4.945 | 5.340 | 4.850 | 5.507 | 0.542 | 0.606 |
| 3.072 | 4.576 | 3.944 | 4.353 | 4.320 | 0.412 | 0.606 |
| 4.732 | 5.447 | 6.007 | 5.709 | 5.412 | 0.631 | 0.606 |
| 5.761 | 4.412 | 6.098 | 3.259 | 4.625 | 0.640 | 0.606 |
| 5.285 | 3.978 | 4.702 | 5.312 | 4.431 | 0.487 | 0.606 |
| 5.507 | 5.171 | 5.669 | 4.744 | 4.184 | 0.487 | 0.606 |
| 7.488 | 7.114 | 8.361 | 6.345 | 6.492 | 0.457 | 0.606 |
| 7.198 | 6.754 | 8.082 | 6.148 | 6.692 | 0.422 | 0.606 |
| 7.243 | 6.939 | 8.082 | 6.095 | 6.634 | 0.431 | 0.606 |
| 7.315 | 7.050 | 8.188 | 6.375 | 6.805 | 0.409 | 0.606 |
| 4.289 | 5.062 | 5.283 | 4.141 | 5.157 | 0.541 | 0.606 |
| 1.495 | 5.570 | 1.899 | 5.248 | 5.319 | 1.010 | 0.606 |
| 3.605 | 2.833 | 2.040 | 3.753 | 3.681 | 0.466 | 0.606 |
| 2.873 | 2.231 | 3.413 | 2.315 | 1.889 | 0.468 | 0.606 |
| 2.251 | 3.098 | 2.601 | 2.033 | 2.060 | 0.492 | 0.606 |
| 4.487 | 4.247 | 6.360 | 3.627 | 3.289 | 0.646 | 0.606 |
| 7.111 | 6.573 | 7.946 | 6.220 | 6.518 | 0.416 | 0.606 |
| 3.203 | 3.174 | 4.241 | 3.489 | 3.208 | 0.474 | 0.606 |
| 4.765 | 2.523 | 4.341 | 2.283 | 2.939 | 0.830 | 0.606 |
| 5.635 | 5.338 | 5.699 | 4.203 | 5.365 | 0.530 | 0.606 |
| 4.271 | 4.460 | 4.844 | 5.050 | 5.440 | 0.500 | 0.606 |
| 7.298 | 6.029 | 7.680 | 5.273 | 5.463 | 0.610 | 0.606 |
| 5.343 | 5.957 | 2.140 | 5.657 | 6.032 | 0.850 | 0.606 |
| 3.415 | 3.793 | 2.943 | 4.293 | 4.340 | 0.522 | 0.606 |
| 5.576 | 7.039 | 3.207 | 7.730 | 6.866 | 0.919 | 0.606 |
| 3.512 | 2.773 | 3.575 | 2.194 | 2.970 | 0.461 | 0.606 |
| 3.950 | 4.028 | 2.524 | 4.771 | 4.626 | 0.481 | 0.606 |
| 2.898 | 2.961 | 4.000 | 2.288 | 1.924 | 0.540 | 0.606 |
| 2.375 | 3.188 | 1.582 | 3.404 | 3.760 | 0.484 | 0.606 |
| 3.197 | 3.187 | 4.184 | 3.024 | 3.870 | 0.458 | 0.606 |
| 3.150 | 2.743 | 3.727 | 3.539 | 2.325 | 0.574 | 0.606 |
| 4.648 | 5.165 | 5.026 | 5.383 | 5.025 | 0.339 | 0.606 |
| 4.451 | 4.148 | 2.545 | 4.133 | 4.680 | 0.561 | 0.606 |
| 3.546 | 1.950 | 2.707 | 1.594 | 1.956 | 0.511 | 0.606 |
| 2.107 | 3.622 | 1.644 | 4.117 | 4.028 | 0.660 | 0.606 |
| 3.619 | 2.185 | 3.044 | 2.487 | 2.449 | 0.502 | 0.606 |
| 3.162 | 4.086 | 2.333 | 4.433 | 4.385 | 0.534 | 0.606 |
| 1.172 | 2.573 | 1.447 | 2.747 | 3.629 | 0.600 | 0.606 |
| 4.627 | 4.794 | 2.723 | 5.069 | 5.226 | 0.574 | 0.606 |
| 2.027 | 2.824 | 1.790 | 2.065 | 2.373 | 0.466 | 0.606 |
| 2.065 | 1.683 | 1.440 | 1.926 | 1.735 | 0.417 | 0.606 |
| 3.856 | 2.557 | 4.893 | 2.863 | 3.908 | 0.693 | 0.606 |



|       |       |       |       |       |       |       |
|-------|-------|-------|-------|-------|-------|-------|
| 1.061 | 2.712 | 0.822 | 2.597 | 2.145 | 0.568 | 0.606 |
| 4.155 | 3.395 | 4.874 | 3.125 | 3.111 | 0.474 | 0.606 |
| 4.804 | 3.442 | 6.131 | 4.002 | 4.212 | 0.874 | 0.606 |
| 2.802 | 3.353 | 2.718 | 3.988 | 4.033 | 0.456 | 0.606 |
| 4.781 | 4.365 | 5.913 | 4.041 | 3.551 | 0.721 | 0.606 |
| 5.690 | 4.726 | 5.541 | 5.219 | 5.282 | 0.443 | 0.606 |
| 3.277 | 1.817 | 2.065 | 1.954 | 1.921 | 0.563 | 0.606 |
| 1.880 | 1.632 | 1.195 | 1.370 | 1.295 | 1.354 | 0.606 |
| 4.415 | 3.358 | 5.229 | 2.742 | 3.146 | 0.629 | 0.606 |
| 6.463 | 5.378 | 5.884 | 6.546 | 5.700 | 0.479 | 0.606 |
| 5.465 | 4.929 | 4.302 | 5.802 | 5.584 | 0.515 | 0.606 |
| 1.478 | 2.577 | 1.072 | 2.605 | 3.513 | 0.615 | 0.606 |
| 0.913 | 4.889 | 1.363 | 5.730 | 4.519 | 1.066 | 0.606 |
| 3.095 | 4.934 | 3.730 | 5.263 | 4.751 | 0.499 | 0.606 |
| 5.252 | 6.231 | 3.010 | 6.824 | 6.350 | 0.868 | 0.606 |
| 4.797 | 1.449 | 1.845 | 2.363 | 1.665 | 0.877 | 0.606 |
| 7.486 | 6.780 | 8.663 | 6.323 | 6.497 | 0.524 | 0.606 |
| 6.697 | 5.549 | 7.385 | 4.122 | 4.318 | 0.772 | 0.606 |
| 3.706 | 3.264 | 1.902 | 1.372 | 3.462 | 0.799 | 0.606 |
| 6.996 | 6.380 | 7.978 | 5.030 | 5.526 | 0.605 | 0.606 |
| 6.579 | 6.629 | 7.928 | 6.050 | 7.133 | 0.576 | 0.606 |
| 2.950 | 2.442 | 1.748 | 2.361 | 1.714 | 0.445 | 0.606 |
| 6.966 | 6.331 | 7.737 | 5.314 | 5.374 | 0.560 | 0.606 |
| 3.867 | 3.417 | 4.198 | 2.656 | 3.360 | 0.459 | 0.606 |
| 2.004 | 1.727 | 2.293 | 1.734 | 1.073 | 0.561 | 0.606 |
| 7.135 | 7.307 | 6.543 | 7.467 | 7.664 | 0.334 | 0.606 |
| 7.364 | 7.986 | 7.203 | 8.198 | 8.160 | 0.396 | 0.606 |
| 4.254 | 4.271 | 3.807 | 3.851 | 3.949 | 0.456 | 0.606 |
| 5.509 | 5.581 | 5.075 | 5.983 | 6.007 | 0.341 | 0.606 |
| 4.068 | 4.447 | 5.134 | 3.656 | 3.891 | 0.390 | 0.606 |
| 3.759 | 4.239 | 3.833 | 4.150 | 4.317 | 0.497 | 0.606 |
| 4.508 | 6.004 | 4.472 | 6.376 | 6.303 | 0.566 | 0.606 |
| 4.892 | 6.889 | 5.276 | 7.619 | 7.291 | 0.644 | 0.606 |
| 4.175 | 5.537 | 3.546 | 5.845 | 5.608 | 0.559 | 0.606 |
| 2.799 | 4.032 | 2.898 | 2.946 | 3.474 | 0.578 | 0.606 |
| 3.527 | 3.206 | 4.558 | 3.002 | 2.948 | 0.506 | 0.606 |
| 6.613 | 7.942 | 5.686 | 8.212 | 7.878 | 0.606 | 0.606 |
| 5.364 | 6.280 | 3.968 | 6.135 | 6.073 | 0.575 | 0.606 |
| 2.447 | 2.436 | 1.848 | 2.660 | 2.094 | 0.492 | 0.606 |
| 5.649 | 6.016 | 4.720 | 5.787 | 6.371 | 0.511 | 0.606 |
| 3.836 | 6.520 | 3.368 | 6.942 | 6.420 | 0.827 | 0.606 |
| 3.764 | 3.964 | 2.790 | 3.440 | 3.912 | 0.465 | 0.606 |
| 2.252 | 1.603 | 1.825 | 2.160 | 1.547 | 0.395 | 0.606 |
| 3.571 | 3.106 | 4.072 | 3.174 | 3.527 | 0.482 | 0.606 |
| 0.910 | 2.110 | 1.171 | 2.232 | 3.394 | 0.607 | 0.606 |
| 4.404 | 3.628 | 4.844 | 4.210 | 3.267 | 0.430 | 0.606 |
| 1.352 | 3.382 | 2.187 | 4.348 | 4.032 | 0.721 | 0.606 |
| 1.935 | 1.768 | 2.923 | 2.010 | 1.718 | 0.427 | 0.606 |
| 3.691 | 2.444 | 2.919 | 1.772 | 1.376 | 0.600 | 0.606 |
| 5.582 | 3.894 | 4.913 | 4.473 | 4.452 | 0.532 | 0.606 |

|       |       |       |       |       |       |       |
|-------|-------|-------|-------|-------|-------|-------|
| 1.796 | 3.254 | 1.860 | 2.733 | 3.048 | 0.510 | 0.606 |
| 3.794 | 3.418 | 3.385 | 3.334 | 3.262 | 0.437 | 0.606 |
| 1.607 | 1.657 | 3.445 | 1.916 | 2.257 | 0.619 | 0.606 |
| 3.032 | 3.176 | 3.113 | 2.659 | 2.826 | 0.350 | 0.606 |
| 4.018 | 3.549 | 3.958 | 3.015 | 3.467 | 0.481 | 0.606 |
| 2.616 | 2.735 | 2.500 | 2.489 | 2.643 | 0.463 | 0.606 |
| 2.168 | 2.617 | 1.713 | 2.953 | 2.896 | 0.362 | 0.606 |
| 1.355 | 2.625 | 1.795 | 2.224 | 3.047 | 0.509 | 0.606 |
| 5.694 | 5.280 | 5.604 | 5.643 | 5.404 | 0.405 | 0.606 |
| 3.880 | 3.729 | 4.075 | 3.973 | 3.755 | 0.530 | 0.606 |
| 1.885 | 1.428 | 1.589 | 1.599 | 1.994 | 0.317 | 0.606 |
| 4.160 | 2.166 | 5.151 | 2.231 | 3.514 | 0.738 | 0.606 |
| 5.122 | 2.520 | 3.943 | 2.955 | 2.885 | 0.816 | 0.606 |
| 2.811 | 3.692 | 3.025 | 3.854 | 3.908 | 0.400 | 0.606 |
| 3.540 | 3.227 | 4.306 | 2.972 | 3.211 | 0.503 | 0.606 |
| 4.835 | 4.831 | 4.188 | 4.933 | 5.242 | 0.405 | 0.606 |
| 2.389 | 2.740 | 2.156 | 4.173 | 3.127 | 0.430 | 0.606 |
| 3.055 | 2.739 | 3.626 | 2.665 | 2.239 | 0.430 | 0.606 |
| 3.112 | 4.269 | 2.072 | 4.213 | 3.561 | 0.521 | 0.606 |
| 3.223 | 2.045 | 2.158 | 2.746 | 3.402 | 0.500 | 0.606 |
| 3.257 | 3.948 | 2.470 | 4.175 | 3.318 | 0.456 | 0.606 |
| 3.138 | 3.323 | 2.342 | 3.424 | 3.301 | 0.433 | 0.606 |
| 3.388 | 3.130 | 2.158 | 3.707 | 3.815 | 0.534 | 0.606 |
| 1.961 | 2.409 | 2.232 | 3.174 | 3.410 | 0.471 | 0.606 |
| 3.209 | 2.431 | 2.690 | 2.472 | 2.019 | 0.402 | 0.606 |
| 2.960 | 3.855 | 4.095 | 4.254 | 3.661 | 0.403 | 0.606 |
| 1.970 | 1.811 | 1.627 | 1.334 | 1.379 | 0.380 | 0.606 |
| 2.690 | 2.523 | 3.268 | 1.597 | 1.958 | 0.507 | 0.606 |
| 3.788 | 2.875 | 3.773 | 3.159 | 2.626 | 0.460 | 0.606 |
| 4.725 | 3.871 | 4.657 | 3.503 | 4.101 | 0.476 | 0.606 |
| 2.061 | 4.013 | 2.728 | 4.534 | 4.172 | 0.606 | 0.606 |
| 3.130 | 2.204 | 3.494 | 2.695 | 2.823 | 0.528 | 0.606 |
| 4.013 | 3.096 | 4.105 | 4.175 | 4.182 | 0.476 | 0.606 |
| 3.345 | 2.983 | 2.799 | 4.034 | 4.004 | 0.390 | 0.606 |
| 3.238 | 3.550 | 5.190 | 3.394 | 3.954 | 0.536 | 0.606 |
| 4.171 | 3.255 | 4.032 | 3.503 | 3.368 | 0.508 | 0.606 |
| 2.214 | 3.194 | 1.907 | 3.740 | 3.894 | 0.530 | 0.606 |
| 4.409 | 2.698 | 4.097 | 2.716 | 3.252 | 0.615 | 0.606 |
| 5.225 | 4.501 | 5.492 | 4.339 | 3.848 | 0.537 | 0.606 |
| 3.218 | 1.642 | 1.604 | 3.086 | 2.668 | 0.491 | 0.606 |
| 3.103 | 3.515 | 3.664 | 4.423 | 4.340 | 0.453 | 0.606 |
| 3.202 | 3.412 | 2.410 | 3.721 | 3.562 | 0.525 | 0.606 |
| 8.027 | 7.736 | 8.532 | 7.132 | 7.727 | 0.391 | 0.606 |
| 2.624 | 3.521 | 2.520 | 4.064 | 3.272 | 0.479 | 0.606 |
| 1.762 | 2.337 | 2.852 | 2.782 | 3.316 | 0.449 | 0.606 |
| 4.596 | 4.019 | 5.382 | 5.051 | 4.562 | 0.458 | 0.606 |
| 3.479 | 3.030 | 1.749 | 3.530 | 3.364 | 0.489 | 0.606 |
| 5.026 | 3.742 | 3.747 | 3.415 | 3.596 | 0.455 | 0.606 |
| 1.432 | 1.913 | 1.309 | 2.173 | 3.295 | 0.456 | 0.606 |
| 3.020 | 1.739 | 2.733 | 2.329 | 2.588 | 0.488 | 0.606 |

|       |       |       |       |       |       |       |
|-------|-------|-------|-------|-------|-------|-------|
| 4.171 | 3.361 | 4.677 | 3.462 | 3.945 | 0.408 | 0.606 |
| 4.026 | 4.081 | 3.642 | 4.303 | 3.258 | 0.494 | 0.606 |
| 5.319 | 5.898 | 6.250 | 4.836 | 5.631 | 0.407 | 0.606 |
| 1.777 | 1.986 | 1.855 | 1.846 | 2.118 | 0.418 | 0.606 |
| 3.554 | 4.580 | 2.320 | 4.563 | 4.399 | 0.556 | 0.606 |
| 5.076 | 5.222 | 4.644 | 5.434 | 5.052 | 0.447 | 0.606 |
| 8.699 | 7.175 | 8.498 | 7.419 | 7.385 | 0.477 | 0.606 |
| 8.650 | 7.053 | 8.439 | 7.352 | 7.305 | 0.492 | 0.606 |
| 5.780 | 4.396 | 5.751 | 4.097 | 3.149 | 0.842 | 0.606 |
| 4.101 | 3.808 | 5.882 | 3.695 | 4.062 | 0.500 | 0.606 |
| 5.332 | 5.169 | 6.168 | 4.283 | 4.387 | 0.505 | 0.606 |
| 4.985 | 5.358 | 6.134 | 4.413 | 4.505 | 0.476 | 0.606 |
| 5.108 | 5.321 | 6.105 | 3.555 | 4.111 | 0.571 | 0.606 |
| 6.202 | 5.498 | 7.147 | 5.308 | 5.345 | 0.533 | 0.606 |
| 4.260 | 4.871 | 5.600 | 2.756 | 3.981 | 0.596 | 0.606 |
| 2.989 | 4.431 | 6.686 | 2.664 | 4.784 | 0.983 | 0.606 |
| 2.161 | 2.748 | 2.543 | 2.889 | 3.200 | 0.424 | 0.606 |
| 4.698 | 3.638 | 5.160 | 2.927 | 3.327 | 0.562 | 0.606 |
| 5.329 | 5.069 | 5.105 | 5.370 | 5.289 | 0.456 | 0.606 |
| 3.344 | 4.752 | 3.871 | 3.642 | 4.459 | 0.471 | 0.606 |
| 8.227 | 9.761 | 9.676 | 9.912 | 8.209 | 0.646 | 0.606 |
| 3.887 | 4.900 | 4.273 | 5.360 | 5.425 | 0.447 | 0.606 |
| 4.399 | 4.111 | 4.342 | 4.785 | 4.501 | 0.372 | 0.606 |
| 3.726 | 3.326 | 2.630 | 3.936 | 3.095 | 0.431 | 0.606 |
| 4.311 | 4.631 | 3.548 | 3.132 | 5.157 | 0.526 | 0.606 |
| 3.593 | 3.443 | 1.428 | 4.660 | 4.048 | 0.616 | 0.606 |
| 3.508 | 3.256 | 4.701 | 3.071 | 3.246 | 0.468 | 0.606 |
| 4.226 | 4.765 | 3.140 | 4.659 | 4.561 | 0.508 | 0.606 |
| 3.972 | 4.637 | 5.738 | 4.610 | 4.269 | 0.505 | 0.606 |
| 4.025 | 4.304 | 4.541 | 5.047 | 4.261 | 0.410 | 0.606 |
| 3.326 | 3.347 | 3.163 | 3.005 | 3.341 | 0.377 | 0.606 |
| 3.571 | 3.542 | 4.024 | 3.155 | 2.996 | 0.430 | 0.606 |
| 3.577 | 2.602 | 2.638 | 3.908 | 3.467 | 0.435 | 0.606 |
| 5.320 | 5.399 | 5.028 | 5.881 | 5.703 | 0.358 | 0.606 |
| 2.032 | 2.638 | 2.902 | 3.300 | 2.719 | 0.341 | 0.606 |
| 1.855 | 2.037 | 2.528 | 2.208 | 2.987 | 0.446 | 0.606 |
| 2.934 | 2.764 | 3.019 | 2.200 | 2.250 | 0.440 | 0.606 |
| 1.801 | 1.866 | 1.872 | 1.827 | 1.657 | 0.369 | 0.606 |
| 2.196 | 2.749 | 3.209 | 1.438 | 2.691 | 0.749 | 0.606 |
| 4.901 | 2.539 | 2.019 | 1.727 | 2.827 | 1.029 | 0.606 |
| 2.913 | 2.426 | 3.046 | 2.932 | 2.623 | 0.466 | 0.606 |
| 3.862 | 4.140 | 3.862 | 4.136 | 4.400 | 0.489 | 0.606 |
| 2.426 | 2.283 | 3.966 | 3.082 | 2.800 | 0.415 | 0.606 |
| 4.493 | 3.756 | 3.912 | 4.103 | 4.045 | 0.435 | 0.606 |
| 2.532 | 1.874 | 3.256 | 2.230 | 2.326 | 0.479 | 0.606 |
| 2.670 | 2.205 | 3.951 | 1.994 | 2.444 | 0.507 | 0.606 |
| 2.146 | 2.199 | 3.406 | 2.404 | 2.480 | 0.501 | 0.606 |
| 3.210 | 2.760 | 2.427 | 2.721 | 3.076 | 0.407 | 0.606 |
| 3.727 | 3.619 | 3.532 | 4.380 | 3.919 | 0.368 | 0.606 |
| 3.587 | 2.259 | 3.445 | 2.886 | 3.087 | 0.498 | 0.606 |

|       |       |       |       |       |       |       |
|-------|-------|-------|-------|-------|-------|-------|
| 4.048 | 3.272 | 3.817 | 3.459 | 3.481 | 0.461 | 0.606 |
| 3.145 | 2.718 | 2.962 | 2.440 | 3.076 | 0.595 | 0.606 |
| 4.133 | 2.955 | 4.564 | 3.299 | 3.007 | 0.505 | 0.606 |
| 3.855 | 4.021 | 3.445 | 4.336 | 3.939 | 0.475 | 0.606 |
| 2.891 | 3.444 | 3.935 | 3.404 | 3.420 | 0.440 | 0.606 |
| 4.254 | 4.071 | 6.577 | 3.348 | 3.858 | 0.644 | 0.606 |
| 3.594 | 4.086 | 1.228 | 4.651 | 4.632 | 0.737 | 0.606 |
| 3.590 | 2.929 | 4.221 | 2.817 | 3.129 | 0.442 | 0.606 |
| 2.520 | 1.968 | 2.638 | 2.758 | 1.793 | 0.632 | 0.606 |
| 2.065 | 2.262 | 2.780 | 2.308 | 2.466 | 0.410 | 0.606 |
| 3.740 | 1.781 | 2.373 | 3.393 | 2.779 | 0.472 | 0.606 |
| 3.608 | 3.689 | 5.009 | 2.799 | 2.740 | 0.523 | 0.606 |
| 2.957 | 1.459 | 1.698 | 3.184 | 2.517 | 0.492 | 0.606 |
| 3.050 | 2.651 | 2.579 | 1.794 | 3.121 | 0.575 | 0.606 |
| 4.841 | 5.152 | 4.477 | 5.915 | 5.456 | 0.449 | 0.606 |
| 5.445 | 4.868 | 6.365 | 4.752 | 4.943 | 0.421 | 0.606 |
| 4.860 | 4.616 | 5.910 | 5.537 | 5.447 | 0.520 | 0.606 |
| 3.937 | 2.657 | 3.999 | 2.570 | 2.892 | 0.464 | 0.606 |
| 2.241 | 4.843 | 1.590 | 4.926 | 5.009 | 0.826 | 0.606 |
| 5.996 | 5.867 | 6.254 | 6.029 | 6.096 | 0.515 | 0.606 |
| 1.843 | 2.519 | 1.910 | 2.914 | 1.954 | 0.617 | 0.606 |
| 3.508 | 2.640 | 3.143 | 2.767 | 2.720 | 0.414 | 0.606 |
| 4.484 | 3.783 | 4.835 | 3.355 | 3.691 | 0.514 | 0.606 |
| 2.020 | 2.153 | 2.345 | 2.300 | 1.836 | 0.406 | 0.606 |
| 3.426 | 2.542 | 5.586 | 2.875 | 3.315 | 0.704 | 0.606 |
| 1.825 | 1.449 | 2.678 | 0.914 | 1.074 | 0.650 | 0.606 |
| 4.622 | 2.670 | 2.185 | 3.189 | 3.137 | 0.586 | 0.606 |
| 3.566 | 3.392 | 4.610 | 3.120 | 3.159 | 0.437 | 0.606 |
| 5.731 | 2.665 | 6.358 | 2.202 | 1.652 | 1.072 | 0.606 |
| 2.623 | 5.901 | 1.929 | 5.269 | 5.218 | 0.801 | 0.606 |
| 3.767 | 4.312 | 5.351 | 4.507 | 3.875 | 0.585 | 0.606 |
| 3.447 | 2.797 | 3.042 | 3.307 | 3.740 | 0.426 | 0.606 |
| 3.124 | 2.138 | 2.636 | 2.814 | 2.631 | 0.509 | 0.606 |
| 3.906 | 4.709 | 4.152 | 4.203 | 4.302 | 0.521 | 0.606 |
| 2.572 | 2.782 | 6.011 | 2.775 | 3.939 | 0.792 | 0.606 |
| 3.772 | 3.437 | 4.510 | 3.282 | 3.335 | 0.435 | 0.606 |
| 3.942 | 4.506 | 4.237 | 4.127 | 4.666 | 0.452 | 0.606 |
| 2.673 | 2.625 | 1.769 | 2.788 | 2.183 | 0.410 | 0.606 |
| 3.321 | 3.279 | 3.737 | 3.146 | 3.036 | 0.382 | 0.606 |
| 3.558 | 3.089 | 4.222 | 1.599 | 2.575 | 0.560 | 0.606 |
| 3.122 | 2.418 | 3.953 | 2.662 | 2.444 | 0.481 | 0.606 |
| 6.244 | 5.317 | 6.563 | 5.963 | 5.623 | 0.420 | 0.606 |
| 4.220 | 4.494 | 3.993 | 5.639 | 5.243 | 0.524 | 0.606 |
| 2.148 | 2.293 | 1.482 | 2.442 | 1.960 | 0.434 | 0.606 |
| 4.323 | 3.605 | 4.505 | 3.573 | 3.291 | 0.522 | 0.606 |
| 4.603 | 5.100 | 2.466 | 5.738 | 5.186 | 0.627 | 0.606 |
| 3.258 | 3.715 | 4.425 | 3.639 | 3.745 | 0.406 | 0.606 |
| 2.627 | 2.682 | 2.968 | 2.115 | 2.456 | 0.477 | 0.606 |
| 2.837 | 3.535 | 3.522 | 1.726 | 2.701 | 0.499 | 0.606 |
| 3.295 | 3.133 | 2.431 | 3.289 | 3.049 | 0.606 | 0.606 |

|       |       |       |       |       |       |       |
|-------|-------|-------|-------|-------|-------|-------|
| 2.789 | 2.791 | 3.846 | 2.312 | 2.277 | 0.703 | 0.606 |
| 4.338 | 4.396 | 5.457 | 3.611 | 3.742 | 0.464 | 0.606 |
| 2.819 | 1.126 | 2.954 | 2.875 | 1.596 | 0.728 | 0.606 |
| 3.725 | 3.228 | 4.692 | 3.382 | 2.809 | 0.461 | 0.606 |
| 4.132 | 3.202 | 5.356 | 2.529 | 2.714 | 0.604 | 0.606 |
| 3.679 | 2.498 | 3.898 | 2.814 | 2.937 | 0.427 | 0.606 |
| 4.571 | 6.874 | 3.812 | 7.253 | 6.777 | 0.797 | 0.606 |
| 4.204 | 6.311 | 2.992 | 6.893 | 6.215 | 0.818 | 0.606 |
| 3.977 | 3.086 | 5.906 | 3.479 | 4.449 | 0.645 | 0.606 |
| 4.721 | 5.150 | 5.397 | 5.481 | 5.884 | 0.463 | 0.606 |
| 4.489 | 4.746 | 5.438 | 3.630 | 4.753 | 0.480 | 0.606 |
| 8.224 | 7.821 | 8.752 | 7.123 | 7.716 | 0.420 | 0.606 |
| 2.133 | 2.798 | 2.478 | 2.652 | 2.542 | 0.442 | 0.606 |
| 5.463 | 3.667 | 5.193 | 4.556 | 4.235 | 0.575 | 0.606 |
| 3.034 | 2.252 | 4.737 | 1.781 | 2.148 | 0.609 | 0.606 |
| 3.088 | 2.861 | 1.679 | 3.286 | 3.460 | 0.631 | 0.606 |
| 4.304 | 3.398 | 4.453 | 3.496 | 3.454 | 0.641 | 0.606 |
| 3.486 | 2.204 | 3.803 | 2.362 | 2.364 | 0.453 | 0.606 |
| 1.563 | 2.658 | 1.753 | 3.309 | 3.046 | 0.441 | 0.606 |
| 2.880 | 1.915 | 2.025 | 1.362 | 2.116 | 0.498 | 0.606 |
| 2.008 | 3.525 | 4.130 | 2.908 | 3.307 | 0.505 | 0.606 |
| 3.487 | 4.703 | 2.901 | 4.662 | 4.850 | 0.539 | 0.606 |
| 3.591 | 3.645 | 4.811 | 3.555 | 3.907 | 0.509 | 0.606 |
| 4.109 | 3.901 | 3.944 | 4.584 | 3.630 | 0.423 | 0.606 |
| 4.189 | 3.961 | 4.403 | 3.213 | 3.578 | 0.386 | 0.606 |
| 3.882 | 3.309 | 4.574 | 3.206 | 2.744 | 0.512 | 0.606 |
| 1.641 | 2.193 | 2.443 | 1.976 | 1.414 | 0.379 | 0.606 |
| 3.779 | 3.234 | 5.491 | 3.307 | 3.663 | 0.584 | 0.606 |
| 6.291 | 6.429 | 6.867 | 5.783 | 6.496 | 0.431 | 0.606 |
| 1.565 | 3.919 | 1.213 | 3.075 | 4.212 | 0.631 | 0.606 |
| 1.270 | 1.696 | 1.765 | 2.437 | 2.511 | 0.420 | 0.606 |
| 3.090 | 3.465 | 3.619 | 2.970 | 2.801 | 0.446 | 0.606 |
| 4.245 | 2.731 | 4.000 | 3.630 | 3.910 | 0.486 | 0.606 |
| 4.284 | 3.742 | 5.255 | 4.239 | 3.989 | 0.526 | 0.606 |
| 4.722 | 4.936 | 6.456 | 4.937 | 5.149 | 0.534 | 0.606 |
| 3.096 | 2.526 | 3.683 | 1.674 | 2.658 | 0.729 | 0.606 |
| 1.288 | 1.355 | 1.259 | 2.549 | 1.641 | 0.415 | 0.606 |
| 6.714 | 5.953 | 6.674 | 5.228 | 5.900 | 0.577 | 0.606 |
| 2.623 | 3.230 | 2.112 | 3.040 | 3.276 | 0.405 | 0.606 |
| 2.259 | 2.667 | 1.816 | 2.398 | 1.849 | 0.434 | 0.606 |
| 2.008 | 1.700 | 1.216 | 3.221 | 3.078 | 0.682 | 0.606 |
| 4.068 | 3.552 | 4.808 | 3.105 | 3.377 | 0.682 | 0.606 |
| 3.201 | 2.887 | 2.250 | 2.874 | 3.136 | 0.489 | 0.606 |
| 4.605 | 5.160 | 4.671 | 5.101 | 5.241 | 0.371 | 0.606 |
| 3.822 | 3.805 | 2.491 | 4.239 | 4.653 | 0.603 | 0.606 |
| 3.135 | 3.879 | 5.064 | 2.840 | 3.016 | 0.806 | 0.606 |
| 3.161 | 2.836 | 4.007 | 3.369 | 3.361 | 0.439 | 0.606 |
| 3.953 | 3.878 | 3.686 | 3.812 | 5.096 | 0.665 | 0.606 |
| 4.687 | 6.213 | 3.943 | 6.796 | 7.035 | 0.687 | 0.606 |
| 1.343 | 4.262 | 1.575 | 4.357 | 4.268 | 0.769 | 0.606 |

|       |       |       |       |       |       |       |
|-------|-------|-------|-------|-------|-------|-------|
| 2.694 | 3.289 | 3.126 | 2.780 | 2.966 | 0.489 | 0.606 |
| 3.041 | 3.156 | 3.672 | 2.372 | 2.719 | 0.457 | 0.606 |
| 0.970 | 2.047 | 1.130 | 2.872 | 3.216 | 0.584 | 0.606 |
| 2.296 | 2.009 | 1.089 | 2.144 | 2.402 | 0.492 | 0.606 |
| 3.580 | 3.441 | 4.742 | 2.757 | 3.432 | 0.425 | 0.606 |
| 2.304 | 1.537 | 2.670 | 2.709 | 2.081 | 0.440 | 0.606 |
| 1.830 | 3.036 | 3.517 | 3.921 | 3.138 | 0.555 | 0.606 |
| 4.134 | 3.219 | 4.133 | 3.656 | 3.427 | 0.440 | 0.606 |
| 3.094 | 2.331 | 3.225 | 2.079 | 2.409 | 0.507 | 0.606 |
| 4.538 | 5.409 | 6.036 | 4.070 | 4.414 | 0.755 | 0.606 |
| 2.168 | 2.291 | 3.089 | 2.250 | 2.243 | 0.512 | 0.606 |
| 1.320 | 1.298 | 1.336 | 0.779 | 3.279 | 0.667 | 0.606 |
| 2.547 | 2.495 | 3.499 | 1.942 | 1.814 | 0.502 | 0.606 |
| 3.780 | 1.105 | 1.834 | 3.247 | 3.133 | 0.919 | 0.606 |
| 3.308 | 2.187 | 1.058 | 2.834 | 1.443 | 0.678 | 0.606 |
| 2.690 | 2.586 | 3.521 | 2.397 | 3.088 | 0.422 | 0.606 |
| 5.427 | 3.277 | 6.060 | 2.304 | 3.125 | 0.979 | 0.606 |
| 2.565 | 3.541 | 2.566 | 2.139 | 2.581 | 0.518 | 0.606 |
| 1.603 | 2.520 | 0.503 | 3.465 | 2.353 | 0.570 | 0.606 |
| 2.657 | 1.528 | 4.112 | 1.714 | 1.417 | 0.649 | 0.606 |
| 2.923 | 2.546 | 3.308 | 2.953 | 3.139 | 0.412 | 0.606 |
| 1.950 | 2.533 | 1.466 | 2.370 | 2.281 | 0.388 | 0.606 |
| 2.644 | 3.001 | 2.443 | 3.170 | 3.151 | 0.396 | 0.606 |
| 2.312 | 2.709 | 2.847 | 2.051 | 1.657 | 0.440 | 0.606 |
| 2.015 | 3.953 | 1.295 | 4.929 | 4.748 | 0.825 | 0.606 |
| 3.601 | 3.287 | 4.940 | 2.311 | 2.476 | 0.585 | 0.606 |
| 1.591 | 3.362 | 0.992 | 4.217 | 4.078 | 0.752 | 0.606 |
| 6.700 | 6.343 | 6.931 | 5.531 | 6.515 | 0.443 | 0.606 |
| 3.206 | 3.198 | 2.491 | 3.350 | 3.419 | 0.457 | 0.606 |
| 2.823 | 3.174 | 3.050 | 4.043 | 3.690 | 0.491 | 0.606 |
| 3.096 | 2.682 | 3.065 | 2.562 | 2.692 | 0.417 | 0.606 |
| 3.600 | 4.131 | 4.125 | 4.880 | 4.788 | 0.361 | 0.606 |
| 1.734 | 3.548 | 2.058 | 3.557 | 3.701 | 0.660 | 0.606 |
| 3.194 | 3.838 | 4.426 | 2.626 | 2.601 | 0.455 | 0.606 |
| 2.671 | 2.786 | 1.886 | 2.671 | 2.488 | 0.505 | 0.606 |
| 3.522 | 3.174 | 3.229 | 2.994 | 3.077 | 0.488 | 0.606 |
| 4.008 | 4.220 | 4.937 | 3.828 | 3.922 | 0.386 | 0.606 |
| 2.168 | 1.992 | 2.240 | 2.237 | 1.846 | 0.588 | 0.606 |
| 3.107 | 2.875 | 3.044 | 2.620 | 3.047 | 0.407 | 0.606 |
| 2.762 | 1.564 | 3.479 | 1.064 | 1.668 | 0.504 | 0.606 |
| 1.691 | 2.438 | 1.417 | 2.988 | 2.815 | 0.476 | 0.606 |
| 2.915 | 2.602 | 2.737 | 2.057 | 2.270 | 0.720 | 0.606 |
| 3.908 | 4.824 | 4.992 | 4.168 | 4.829 | 0.617 | 0.606 |
| 5.857 | 5.818 | 6.469 | 4.885 | 5.951 | 0.423 | 0.606 |
| 5.841 | 5.822 | 6.559 | 4.888 | 5.978 | 0.443 | 0.606 |
| 7.132 | 7.023 | 7.900 | 6.433 | 6.911 | 0.382 | 0.606 |
| 4.813 | 4.806 | 4.599 | 2.720 | 5.038 | 0.687 | 0.606 |
| 2.797 | 2.669 | 1.932 | 2.428 | 2.914 | 0.368 | 0.606 |
| 3.186 | 2.344 | 4.545 | 2.200 | 3.178 | 0.537 | 0.606 |
| 3.905 | 3.512 | 4.007 | 2.623 | 2.252 | 0.535 | 0.606 |

|       |       |       |       |       |       |       |
|-------|-------|-------|-------|-------|-------|-------|
| 4.420 | 4.406 | 5.197 | 4.096 | 4.149 | 0.692 | 0.606 |
| 2.129 | 1.535 | 2.232 | 1.803 | 2.069 | 0.391 | 0.606 |
| 3.002 | 1.622 | 1.504 | 1.836 | 1.417 | 0.613 | 0.606 |
| 4.462 | 4.186 | 5.139 | 4.287 | 3.600 | 0.492 | 0.606 |
| 5.251 | 2.704 | 5.510 | 2.660 | 1.918 | 0.902 | 0.606 |
| 4.113 | 2.745 | 5.304 | 2.384 | 3.245 | 0.764 | 0.606 |
| 1.988 | 1.771 | 2.348 | 2.113 | 1.486 | 0.516 | 0.606 |
| 3.635 | 3.336 | 4.255 | 4.288 | 4.781 | 0.638 | 0.606 |
| 2.071 | 2.348 | 2.387 | 2.483 | 2.779 | 0.703 | 0.606 |
| 7.420 | 7.543 | 7.695 | 6.161 | 7.491 | 0.556 | 0.606 |
| 7.725 | 7.383 | 8.348 | 6.623 | 7.271 | 0.440 | 0.606 |
| 2.328 | 2.939 | 3.300 | 2.163 | 2.288 | 0.386 | 0.606 |
| 3.003 | 4.243 | 3.103 | 4.229 | 3.560 | 0.529 | 0.606 |
| 2.505 | 2.412 | 1.583 | 2.891 | 2.841 | 0.393 | 0.606 |
| 1.300 | 1.968 | 3.502 | 2.941 | 3.125 | 0.691 | 0.606 |
| 2.015 | 3.695 | 2.932 | 3.349 | 3.309 | 0.580 | 0.606 |
| 1.913 | 1.534 | 2.389 | 2.557 | 1.857 | 0.429 | 0.606 |
| 1.041 | 3.251 | 1.895 | 3.467 | 2.773 | 0.589 | 0.606 |
| 3.130 | 2.936 | 4.242 | 3.148 | 3.158 | 0.564 | 0.606 |
| 4.329 | 3.573 | 4.156 | 2.820 | 2.654 | 0.645 | 0.606 |
| 4.913 | 4.006 | 4.242 | 3.422 | 4.255 | 0.615 | 0.606 |
| 1.862 | 1.442 | 3.006 | 1.833 | 2.046 | 0.463 | 0.606 |
| 2.970 | 2.343 | 2.970 | 2.213 | 2.871 | 0.412 | 0.606 |
| 2.432 | 2.327 | 2.625 | 3.098 | 2.825 | 0.378 | 0.606 |
| 1.721 | 2.746 | 1.493 | 4.065 | 2.354 | 0.566 | 0.606 |
| 1.508 | 2.505 | 1.730 | 2.482 | 2.675 | 0.511 | 0.606 |
| 3.001 | 3.967 | 3.811 | 4.630 | 4.372 | 0.470 | 0.606 |
| 3.592 | 2.468 | 4.173 | 1.925 | 2.049 | 0.529 | 0.606 |
| 1.759 | 3.092 | 1.718 | 3.761 | 4.276 | 0.636 | 0.606 |
| 3.506 | 4.140 | 4.353 | 4.557 | 4.044 | 0.381 | 0.606 |
| 3.071 | 2.910 | 3.186 | 2.864 | 2.392 | 0.479 | 0.606 |
| 3.027 | 2.530 | 1.994 | 2.044 | 3.184 | 0.420 | 0.606 |
| 2.623 | 2.329 | 2.909 | 2.679 | 2.451 | 0.426 | 0.606 |
| 4.968 | 4.813 | 5.367 | 4.741 | 4.640 | 0.465 | 0.606 |
| 3.618 | 4.926 | 5.025 | 4.218 | 4.925 | 0.435 | 0.606 |
| 4.280 | 6.396 | 2.412 | 5.666 | 5.765 | 1.011 | 0.606 |
| 4.527 | 3.097 | 5.153 | 2.999 | 3.206 | 0.721 | 0.606 |
| 2.838 | 2.203 | 3.504 | 2.546 | 2.019 | 0.461 | 0.606 |
| 3.622 | 2.691 | 3.388 | 3.189 | 3.570 | 0.435 | 0.606 |
| 3.951 | 3.088 | 3.471 | 2.854 | 3.058 | 0.510 | 0.606 |
| 7.044 | 6.392 | 7.049 | 6.058 | 5.608 | 0.663 | 0.606 |
| 4.499 | 2.904 | 4.886 | 3.303 | 3.151 | 0.541 | 0.606 |
| 4.506 | 3.144 | 5.836 | 1.939 | 2.172 | 0.907 | 0.606 |
| 4.750 | 4.219 | 3.936 | 3.150 | 3.497 | 0.518 | 0.606 |
| 3.203 | 2.885 | 3.873 | 3.307 | 2.917 | 0.544 | 0.606 |
| 8.458 | 8.598 | 8.260 | 8.817 | 8.882 | 0.344 | 0.606 |
| 5.347 | 6.035 | 7.910 | 4.268 | 4.703 | 0.709 | 0.606 |
| 4.204 | 4.355 | 5.177 | 3.980 | 3.789 | 0.438 | 0.606 |
| 1.987 | 2.739 | 3.326 | 2.854 | 2.736 | 0.411 | 0.606 |
| 4.372 | 3.427 | 5.101 | 3.534 | 4.475 | 0.438 | 0.606 |

|       |       |       |       |       |       |       |
|-------|-------|-------|-------|-------|-------|-------|
| 3.916 | 3.561 | 4.615 | 3.811 | 3.506 | 0.428 | 0.606 |
| 3.475 | 1.816 | 3.454 | 2.406 | 1.903 | 0.551 | 0.606 |
| 4.155 | 3.998 | 4.813 | 4.015 | 4.723 | 0.438 | 0.606 |
| 2.046 | 1.981 | 1.009 | 2.276 | 2.899 | 0.448 | 0.606 |
| 5.412 | 4.716 | 3.612 | 5.456 | 5.757 | 0.559 | 0.606 |
| 2.413 | 3.181 | 2.169 | 2.809 | 3.518 | 0.440 | 0.606 |
| 1.252 | 3.152 | 1.185 | 2.899 | 2.664 | 0.574 | 0.606 |
| 1.728 | 2.053 | 1.938 | 2.408 | 3.231 | 0.475 | 0.606 |
| 4.041 | 2.846 | 4.491 | 3.254 | 3.724 | 0.462 | 0.606 |
| 2.475 | 2.664 | 1.852 | 2.081 | 2.071 | 0.390 | 0.606 |
| 4.490 | 4.888 | 3.593 | 4.577 | 5.062 | 0.471 | 0.606 |
| 2.888 | 2.857 | 3.376 | 2.837 | 2.295 | 0.539 | 0.606 |
| 2.780 | 3.244 | 4.213 | 3.992 | 3.357 | 0.524 | 0.606 |
| 3.422 | 4.565 | 6.361 | 3.366 | 6.178 | 1.141 | 0.606 |
| 2.360 | 3.503 | 2.168 | 4.629 | 3.815 | 0.613 | 0.606 |
| 4.715 | 2.366 | 2.951 | 2.959 | 3.228 | 0.532 | 0.606 |
| 2.583 | 2.219 | 3.010 | 2.704 | 2.538 | 0.644 | 0.606 |
| 2.657 | 2.682 | 3.452 | 2.483 | 2.489 | 0.473 | 0.606 |
| 4.035 | 3.299 | 5.171 | 3.240 | 3.605 | 0.564 | 0.606 |
| 1.974 | 3.097 | 2.064 | 3.004 | 3.578 | 0.499 | 0.606 |
| 2.168 | 1.808 | 1.822 | 1.651 | 2.042 | 0.514 | 0.606 |
| 2.654 | 2.180 | 2.140 | 2.082 | 1.997 | 0.406 | 0.606 |
| 3.892 | 2.795 | 2.522 | 2.502 | 3.297 | 0.462 | 0.606 |
| 1.043 | 2.521 | 1.100 | 1.321 | 2.842 | 0.476 | 0.606 |
| 4.495 | 5.498 | 3.093 | 5.793 | 5.886 | 0.663 | 0.606 |
| 2.873 | 2.653 | 2.330 | 2.718 | 2.755 | 0.459 | 0.606 |
| 2.444 | 2.280 | 1.804 | 3.498 | 3.326 | 0.552 | 0.606 |
| 2.257 | 2.669 | 2.127 | 1.689 | 2.195 | 0.607 | 0.606 |
| 2.668 | 2.970 | 2.769 | 3.033 | 4.102 | 0.424 | 0.606 |
| 4.495 | 3.690 | 2.854 | 4.449 | 3.813 | 0.417 | 0.606 |
| 2.117 | 1.784 | 3.215 | 1.643 | 1.841 | 0.458 | 0.606 |
| 4.588 | 4.203 | 3.816 | 4.500 | 4.181 | 0.503 | 0.606 |
| 1.366 | 3.056 | 2.492 | 2.702 | 2.397 | 0.478 | 0.606 |
| 3.354 | 3.816 | 2.365 | 4.578 | 4.147 | 0.525 | 0.606 |
| 2.346 | 2.694 | 2.537 | 3.662 | 3.578 | 0.435 | 0.606 |
| 4.821 | 3.703 | 3.836 | 3.905 | 4.313 | 0.452 | 0.606 |
| 3.095 | 3.435 | 6.483 | 2.668 | 2.164 | 0.886 | 0.606 |
| 2.889 | 2.810 | 5.914 | 2.004 | 2.104 | 0.724 | 0.606 |
| 2.564 | 2.670 | 2.652 | 3.794 | 3.414 | 0.494 | 0.606 |
| 1.281 | 2.384 | 1.467 | 1.544 | 1.756 | 0.796 | 0.606 |
| 4.279 | 4.514 | 4.690 | 6.359 | 5.030 | 0.649 | 0.606 |
| 2.709 | 2.480 | 2.589 | 2.589 | 3.631 | 0.453 | 0.606 |
| 3.103 | 3.223 | 4.888 | 2.543 | 2.600 | 0.623 | 0.606 |
| 4.262 | 3.605 | 4.791 | 2.962 | 3.663 | 0.517 | 0.606 |
| 2.840 | 2.983 | 3.301 | 2.929 | 2.417 | 0.436 | 0.606 |
| 1.074 | 6.109 | 2.293 | 5.913 | 5.657 | 1.106 | 0.606 |
| 2.633 | 3.157 | 4.115 | 1.642 | 3.202 | 0.683 | 0.606 |
| 6.467 | 5.001 | 6.788 | 4.771 | 4.882 | 0.548 | 0.606 |
| 4.547 | 3.970 | 4.641 | 4.561 | 4.605 | 0.428 | 0.606 |
| 2.964 | 2.456 | 2.291 | 3.171 | 3.347 | 0.457 | 0.606 |



|       |       |       |       |       |       |       |
|-------|-------|-------|-------|-------|-------|-------|
| 3.004 | 2.335 | 3.295 | 2.175 | 2.259 | 0.462 | 0.606 |
| 4.566 | 4.412 | 5.343 | 4.437 | 4.270 | 0.462 | 0.606 |
| 3.355 | 2.248 | 3.933 | 2.670 | 2.055 | 0.564 | 0.606 |
| 1.989 | 1.917 | 2.185 | 1.290 | 2.173 | 0.510 | 0.606 |
| 5.400 | 5.906 | 5.229 | 6.470 | 5.833 | 0.723 | 0.606 |
| 4.067 | 4.228 | 4.821 | 4.479 | 4.438 | 0.365 | 0.606 |
| 2.756 | 2.685 | 3.381 | 2.284 | 3.647 | 0.507 | 0.606 |
| 5.452 | 5.105 | 5.366 | 5.942 | 5.721 | 0.399 | 0.606 |
| 3.044 | 2.931 | 3.167 | 3.522 | 3.451 | 0.441 | 0.606 |
| 5.334 | 5.440 | 5.670 | 5.475 | 4.961 | 0.440 | 0.606 |
| 3.650 | 3.499 | 2.736 | 3.195 | 3.980 | 0.468 | 0.606 |
| 3.058 | 2.410 | 3.772 | 2.069 | 2.280 | 0.496 | 0.606 |
| 4.194 | 4.890 | 3.238 | 3.551 | 3.868 | 0.850 | 0.606 |
| 3.736 | 2.994 | 3.363 | 2.276 | 3.342 | 0.633 | 0.606 |
| 7.873 | 7.619 | 7.513 | 8.062 | 7.861 | 0.342 | 0.606 |
| 4.192 | 3.893 | 4.564 | 3.962 | 4.576 | 0.464 | 0.606 |
| 2.072 | 3.651 | 2.173 | 3.589 | 3.799 | 0.518 | 0.606 |
| 4.335 | 4.615 | 5.580 | 3.304 | 3.522 | 0.526 | 0.606 |
| 4.315 | 4.339 | 4.972 | 4.789 | 4.842 | 0.395 | 0.606 |
| 3.432 | 2.669 | 3.582 | 1.479 | 2.476 | 0.461 | 0.606 |
| 2.096 | 2.183 | 2.173 | 3.140 | 1.975 | 0.486 | 0.606 |
| 1.430 | 2.536 | 1.736 | 3.235 | 2.199 | 0.526 | 0.606 |
| 3.638 | 4.128 | 3.524 | 4.583 | 4.122 | 0.423 | 0.606 |
| 2.866 | 3.408 | 3.093 | 3.681 | 2.187 | 0.434 | 0.606 |
| 4.695 | 4.168 | 4.944 | 3.926 | 3.987 | 0.629 | 0.606 |
| 4.666 | 5.072 | 2.060 | 6.105 | 5.652 | 0.756 | 0.606 |
| 1.643 | 2.091 | 1.634 | 1.731 | 1.309 | 0.401 | 0.606 |
| 3.068 | 2.077 | 3.582 | 1.924 | 2.880 | 0.492 | 0.606 |
| 1.789 | 3.261 | 1.533 | 4.312 | 3.676 | 0.640 | 0.606 |
| 2.736 | 3.517 | 2.321 | 4.386 | 4.280 | 0.513 | 0.606 |
| 3.877 | 5.217 | 2.309 | 6.005 | 5.558 | 0.804 | 0.606 |
| 1.807 | 2.927 | 2.919 | 1.736 | 2.404 | 0.448 | 0.606 |
| 4.237 | 3.724 | 3.534 | 4.251 | 4.386 | 0.426 | 0.606 |
| 4.982 | 4.087 | 5.719 | 4.901 | 4.679 | 0.428 | 0.606 |
| 3.411 | 2.552 | 4.103 | 2.435 | 2.902 | 0.527 | 0.606 |
| 2.056 | 3.105 | 1.756 | 2.178 | 2.479 | 0.536 | 0.606 |
| 4.810 | 5.333 | 5.579 | 4.203 | 5.017 | 0.467 | 0.606 |
| 3.213 | 3.159 | 3.179 | 3.413 | 2.768 | 0.434 | 0.606 |
| 2.547 | 2.536 | 3.393 | 3.127 | 2.815 | 0.413 | 0.606 |
| 3.891 | 4.768 | 4.058 | 3.930 | 3.430 | 0.628 | 0.606 |
| 5.665 | 2.919 | 5.093 | 5.899 | 4.150 | 0.694 | 0.606 |
| 3.964 | 1.817 | 4.477 | 2.407 | 1.200 | 0.900 | 0.606 |
| 2.555 | 2.952 | 2.855 | 2.517 | 2.437 | 0.483 | 0.606 |
| 2.069 | 1.520 | 1.645 | 1.551 | 1.427 | 0.498 | 0.606 |
| 3.668 | 4.878 | 4.080 | 5.593 | 5.447 | 0.996 | 0.606 |
| 3.677 | 3.696 | 3.793 | 2.855 | 1.951 | 0.608 | 0.606 |
| 3.256 | 3.054 | 4.983 | 3.739 | 3.054 | 0.524 | 0.606 |
| 4.501 | 2.381 | 3.007 | 1.971 | 2.211 | 0.623 | 0.606 |
| 2.344 | 3.478 | 2.790 | 3.105 | 3.253 | 0.448 | 0.606 |
| 2.443 | 2.442 | 2.916 | 2.718 | 2.231 | 0.368 | 0.606 |

|        |       |       |       |       |       |       |
|--------|-------|-------|-------|-------|-------|-------|
| 1.883  | 3.255 | 1.902 | 3.052 | 2.767 | 0.422 | 0.606 |
| 4.313  | 5.121 | 4.102 | 6.233 | 5.503 | 0.682 | 0.606 |
| 1.794  | 3.490 | 2.055 | 2.279 | 2.983 | 0.505 | 0.606 |
| 5.521  | 5.117 | 5.186 | 4.807 | 5.192 | 0.469 | 0.606 |
| 3.976  | 2.655 | 4.307 | 2.582 | 2.132 | 0.656 | 0.606 |
| 3.293  | 3.938 | 3.476 | 3.850 | 3.048 | 0.535 | 0.606 |
| 5.266  | 4.838 | 6.130 | 5.140 | 5.165 | 0.488 | 0.606 |
| 1.861  | 2.207 | 1.835 | 1.949 | 2.024 | 0.445 | 0.606 |
| 2.671  | 2.424 | 2.159 | 2.291 | 1.591 | 0.528 | 0.606 |
| 2.107  | 2.790 | 2.588 | 3.573 | 2.817 | 0.484 | 0.606 |
| 2.749  | 3.267 | 3.305 | 2.509 | 3.260 | 0.405 | 0.606 |
| 2.220  | 4.740 | 0.932 | 3.943 | 4.475 | 0.915 | 0.606 |
| 4.554  | 3.488 | 5.032 | 3.409 | 4.091 | 0.668 | 0.606 |
| 2.771  | 2.113 | 2.029 | 1.756 | 2.279 | 0.492 | 0.606 |
| 1.611  | 1.956 | 2.042 | 3.324 | 2.226 | 0.451 | 0.606 |
| 6.885  | 6.449 | 7.271 | 5.070 | 6.777 | 0.627 | 0.606 |
| 6.464  | 5.805 | 6.814 | 4.760 | 6.173 | 0.627 | 0.606 |
| 4.222  | 2.980 | 4.321 | 2.878 | 3.882 | 0.584 | 0.606 |
| 4.028  | 3.524 | 3.455 | 4.185 | 3.668 | 0.408 | 0.606 |
| 6.583  | 7.003 | 6.833 | 7.258 | 6.839 | 0.517 | 0.606 |
| 10.203 | 9.130 | 9.879 | 9.159 | 9.028 | 0.391 | 0.606 |
| 2.209  | 3.706 | 3.086 | 2.162 | 2.357 | 0.599 | 0.606 |
| 4.155  | 3.274 | 2.869 | 3.749 | 2.859 | 0.637 | 0.606 |
| 3.909  | 3.964 | 3.264 | 3.785 | 4.273 | 0.429 | 0.606 |
| 1.997  | 1.959 | 2.400 | 1.790 | 2.123 | 0.419 | 0.606 |
| 4.129  | 4.418 | 3.941 | 4.480 | 3.668 | 0.376 | 0.606 |
| 2.792  | 3.918 | 3.132 | 2.171 | 1.318 | 1.197 | 0.606 |
| 2.120  | 3.025 | 3.033 | 3.546 | 3.460 | 0.512 | 0.606 |
| 4.550  | 4.185 | 4.807 | 5.099 | 5.399 | 0.627 | 0.606 |
| 5.323  | 4.296 | 5.272 | 3.382 | 3.466 | 0.894 | 0.606 |
| 2.243  | 2.728 | 2.209 | 2.007 | 2.573 | 0.462 | 0.606 |
| 5.056  | 3.413 | 5.987 | 3.687 | 3.292 | 0.609 | 0.606 |
| 4.863  | 4.250 | 5.349 | 4.860 | 5.076 | 0.398 | 0.606 |
| 5.408  | 5.514 | 5.518 | 5.241 | 5.968 | 0.486 | 0.606 |
| 6.173  | 5.546 | 6.348 | 5.526 | 5.988 | 0.581 | 0.606 |
| 4.130  | 1.946 | 2.438 | 1.955 | 1.862 | 0.776 | 0.606 |
| 2.010  | 2.828 | 2.505 | 3.109 | 2.197 | 0.474 | 0.606 |
| 2.106  | 3.064 | 1.694 | 2.935 | 2.736 | 0.475 | 0.606 |
| 5.178  | 5.626 | 5.470 | 5.431 | 5.096 | 0.362 | 0.606 |
| 2.933  | 3.781 | 1.550 | 4.007 | 4.136 | 0.598 | 0.606 |
| 2.764  | 4.565 | 4.556 | 3.942 | 4.387 | 0.460 | 0.606 |
| 4.868  | 5.347 | 3.472 | 4.516 | 4.305 | 0.924 | 0.606 |
| 4.010  | 3.061 | 2.429 | 2.637 | 2.539 | 0.905 | 0.606 |
| 2.760  | 2.504 | 2.994 | 1.716 | 2.748 | 0.425 | 0.606 |
| 5.062  | 5.169 | 5.096 | 5.792 | 5.765 | 0.409 | 0.606 |
| 5.897  | 4.829 | 6.499 | 5.479 | 5.994 | 0.675 | 0.606 |
| 6.051  | 6.266 | 5.583 | 6.066 | 6.436 | 0.551 | 0.606 |
| 8.822  | 8.824 | 9.669 | 9.526 | 8.662 | 0.474 | 0.606 |
| 0.841  | 2.656 | 0.998 | 3.618 | 3.972 | 0.721 | 0.606 |
| 9.696  | 9.413 | 8.024 | 9.812 | 9.698 | 0.422 | 0.606 |

|       |       |       |       |       |       |       |
|-------|-------|-------|-------|-------|-------|-------|
| 2.955 | 3.762 | 1.770 | 3.270 | 3.837 | 0.482 | 0.606 |
| 6.176 | 6.264 | 5.304 | 6.454 | 6.334 | 0.497 | 0.606 |
| 5.142 | 3.476 | 4.074 | 5.002 | 4.142 | 0.570 | 0.606 |
| 2.979 | 3.101 | 2.349 | 3.541 | 3.692 | 0.378 | 0.606 |
| 3.077 | 3.212 | 1.732 | 2.976 | 2.797 | 0.522 | 0.606 |
| 3.687 | 4.235 | 4.448 | 4.443 | 4.275 | 0.442 | 0.606 |
| 2.119 | 2.915 | 1.617 | 3.990 | 3.090 | 0.530 | 0.606 |
| 5.115 | 2.362 | 3.691 | 2.416 | 2.424 | 0.729 | 0.606 |
| 5.538 | 6.063 | 6.095 | 5.426 | 5.643 | 0.453 | 0.606 |
| 2.670 | 2.193 | 2.645 | 2.328 | 1.644 | 0.520 | 0.606 |
| 2.033 | 2.947 | 1.678 | 4.096 | 2.798 | 0.601 | 0.606 |
| 1.816 | 1.860 | 1.847 | 1.931 | 2.868 | 0.420 | 0.606 |
| 2.954 | 3.788 | 2.252 | 4.899 | 4.290 | 0.625 | 0.606 |
| 3.889 | 4.282 | 3.467 | 3.458 | 3.804 | 0.534 | 0.606 |
| 2.904 | 3.320 | 3.517 | 2.708 | 3.243 | 0.371 | 0.606 |
| 3.576 | 2.989 | 3.232 | 3.101 | 3.101 | 0.435 | 0.606 |
| 2.980 | 3.065 | 2.615 | 2.912 | 3.680 | 0.358 | 0.606 |
| 4.164 | 4.627 | 4.217 | 4.918 | 4.652 | 0.395 | 0.606 |
| 3.462 | 3.501 | 3.313 | 3.790 | 4.176 | 0.392 | 0.606 |
| 2.043 | 1.094 | 2.310 | 1.691 | 1.879 | 0.618 | 0.606 |
| 2.219 | 2.912 | 3.347 | 2.470 | 3.197 | 0.492 | 0.606 |
| 4.238 | 4.822 | 3.442 | 4.987 | 4.426 | 0.420 | 0.606 |
| 5.105 | 5.539 | 5.505 | 5.748 | 5.650 | 0.409 | 0.606 |
| 8.271 | 8.712 | 6.747 | 9.351 | 9.069 | 0.541 | 0.606 |
| 2.048 | 2.264 | 2.067 | 2.397 | 2.152 | 0.378 | 0.606 |
| 2.776 | 2.598 | 2.670 | 2.038 | 2.108 | 0.377 | 0.606 |
| 4.185 | 4.121 | 4.360 | 3.277 | 3.341 | 0.506 | 0.606 |
| 3.855 | 3.858 | 3.874 | 3.376 | 3.447 | 0.394 | 0.606 |
| 8.888 | 8.078 | 9.661 | 6.973 | 7.352 | 0.572 | 0.606 |
| 2.386 | 2.837 | 1.247 | 2.837 | 4.564 | 0.720 | 0.606 |
| 3.381 | 3.096 | 5.487 | 3.565 | 3.594 | 0.651 | 0.606 |
| 3.554 | 2.987 | 4.323 | 2.355 | 3.315 | 0.605 | 0.606 |
| 3.005 | 2.124 | 2.978 | 1.810 | 2.309 | 0.536 | 0.606 |
| 7.261 | 6.716 | 7.702 | 5.483 | 6.253 | 0.589 | 0.606 |
| 5.509 | 5.751 | 5.753 | 5.061 | 5.136 | 0.357 | 0.606 |
| 6.763 | 6.693 | 4.850 | 7.061 | 6.943 | 0.547 | 0.606 |
| 2.836 | 4.001 | 2.440 | 3.616 | 2.121 | 0.529 | 0.606 |
| 7.301 | 7.096 | 7.864 | 7.408 | 7.475 | 0.320 | 0.606 |
| 7.295 | 7.985 | 6.430 | 8.098 | 7.850 | 0.420 | 0.606 |
| 5.380 | 6.897 | 4.018 | 7.255 | 7.278 | 0.793 | 0.606 |
| 7.514 | 7.435 | 6.888 | 7.726 | 7.823 | 0.343 | 0.606 |
| 3.012 | 3.836 | 3.142 | 3.927 | 3.537 | 0.577 | 0.606 |
| 3.079 | 2.587 | 3.229 | 2.947 | 3.055 | 0.392 | 0.606 |
| 4.573 | 3.227 | 4.393 | 3.771 | 3.731 | 0.520 | 0.606 |
| 5.300 | 5.165 | 7.133 | 4.703 | 4.661 | 0.589 | 0.606 |
| 5.099 | 5.741 | 2.269 | 6.003 | 5.434 | 0.874 | 0.606 |
| 5.913 | 7.950 | 3.726 | 8.390 | 8.235 | 0.969 | 0.606 |
| 4.389 | 6.101 | 3.873 | 6.633 | 6.144 | 0.820 | 0.606 |
| 5.195 | 5.201 | 5.511 | 3.621 | 5.128 | 0.493 | 0.606 |
| 2.049 | 1.667 | 1.982 | 1.233 | 1.287 | 0.622 | 0.606 |

|       |       |       |       |       |       |       |
|-------|-------|-------|-------|-------|-------|-------|
| 3.675 | 3.316 | 3.888 | 2.161 | 2.305 | 0.522 | 0.606 |
| 3.638 | 3.776 | 3.182 | 5.063 | 4.273 | 0.538 | 0.606 |
| 3.191 | 4.800 | 2.297 | 5.432 | 5.110 | 0.701 | 0.606 |
| 6.048 | 6.977 | 3.548 | 7.369 | 7.137 | 0.815 | 0.606 |
| 2.888 | 4.214 | 3.271 | 3.034 | 3.484 | 0.577 | 0.606 |
| 3.301 | 3.626 | 5.115 | 3.641 | 3.730 | 0.458 | 0.606 |
| 4.701 | 4.459 | 4.918 | 3.650 | 4.047 | 0.370 | 0.606 |
| 5.071 | 5.354 | 5.222 | 5.247 | 5.186 | 0.349 | 0.606 |
| 5.467 | 6.326 | 5.292 | 6.624 | 6.603 | 0.421 | 0.606 |
| 7.019 | 7.006 | 6.647 | 7.356 | 7.306 | 0.362 | 0.606 |
| 8.014 | 6.684 | 9.472 | 4.007 | 4.588 | 1.046 | 0.606 |
| 5.103 | 5.093 | 6.453 | 5.259 | 4.965 | 0.570 | 0.606 |
| 4.718 | 5.459 | 3.521 | 5.428 | 5.241 | 0.482 | 0.606 |
| 4.549 | 4.150 | 5.343 | 4.109 | 4.018 | 0.455 | 0.606 |
| 5.242 | 5.256 | 4.059 | 5.778 | 5.900 | 0.417 | 0.606 |
| 5.848 | 5.486 | 7.387 | 4.550 | 4.726 | 0.587 | 0.606 |
| 2.571 | 4.573 | 2.761 | 4.748 | 3.784 | 0.625 | 0.606 |
| 6.310 | 6.549 | 5.842 | 7.172 | 7.154 | 0.403 | 0.606 |
| 3.262 | 4.562 | 2.596 | 5.621 | 4.518 | 0.664 | 0.606 |
| 3.274 | 3.117 | 3.689 | 3.856 | 3.399 | 0.437 | 0.606 |
| 2.194 | 2.617 | 2.919 | 1.687 | 1.854 | 0.526 | 0.606 |
| 3.893 | 5.039 | 4.296 | 3.930 | 4.540 | 0.639 | 0.606 |
| 6.435 | 6.245 | 7.377 | 6.698 | 6.037 | 0.500 | 0.606 |
| 5.783 | 4.340 | 5.018 | 5.131 | 4.707 | 0.634 | 0.606 |
| 3.436 | 3.246 | 3.764 | 2.702 | 3.331 | 0.464 | 0.606 |
| 4.962 | 4.634 | 4.786 | 4.967 | 5.443 | 0.456 | 0.606 |
| 1.825 | 2.682 | 1.832 | 3.086 | 2.421 | 0.417 | 0.606 |
| 3.895 | 4.620 | 3.437 | 4.654 | 4.960 | 0.468 | 0.606 |
| 4.253 | 3.963 | 3.096 | 4.264 | 3.973 | 0.439 | 0.606 |
| 4.008 | 5.239 | 3.639 | 5.905 | 5.668 | 0.638 | 0.606 |
| 5.493 | 5.816 | 5.750 | 5.851 | 5.976 | 0.430 | 0.606 |
| 2.935 | 1.798 | 1.810 | 1.372 | 1.556 | 0.592 | 0.606 |
| 4.155 | 2.560 | 2.691 | 2.811 | 3.219 | 0.584 | 0.606 |
| 4.462 | 4.272 | 3.253 | 4.658 | 4.932 | 0.416 | 0.606 |
| 6.957 | 7.001 | 6.065 | 7.462 | 7.156 | 0.399 | 0.606 |
| 1.024 | 2.161 | 1.093 | 3.687 | 3.580 | 0.731 | 0.606 |
| 4.029 | 4.258 | 2.821 | 4.163 | 4.061 | 0.609 | 0.606 |
| 5.070 | 5.821 | 5.211 | 6.032 | 5.862 | 0.356 | 0.606 |
| 4.931 | 5.237 | 4.076 | 5.253 | 5.633 | 0.419 | 0.606 |
| 4.966 | 3.608 | 5.793 | 2.150 | 2.780 | 0.786 | 0.606 |
| 0.995 | 1.716 | 1.755 | 1.754 | 2.677 | 0.509 | 0.606 |
| 5.375 | 7.631 | 6.339 | 7.901 | 7.903 | 0.820 | 0.606 |
| 2.658 | 2.365 | 2.406 | 2.046 | 2.079 | 0.373 | 0.606 |
| 3.965 | 4.877 | 2.262 | 4.763 | 4.468 | 0.653 | 0.606 |
| 5.763 | 7.189 | 6.903 | 7.622 | 7.443 | 0.556 | 0.606 |
| 2.742 | 1.512 | 1.205 | 2.039 | 1.934 | 0.658 | 0.606 |
| 4.405 | 3.907 | 5.393 | 3.264 | 4.653 | 0.511 | 0.606 |
| 5.202 | 5.399 | 4.216 | 5.853 | 5.816 | 0.401 | 0.606 |
| 3.847 | 4.964 | 3.552 | 5.261 | 4.704 | 0.480 | 0.606 |
| 5.149 | 5.966 | 5.876 | 6.025 | 6.198 | 0.494 | 0.606 |

|       |       |       |       |       |       |       |
|-------|-------|-------|-------|-------|-------|-------|
| 5.467 | 5.054 | 5.173 | 5.755 | 5.304 | 0.477 | 0.606 |
| 4.741 | 4.575 | 3.638 | 5.247 | 4.797 | 0.429 | 0.606 |
| 4.803 | 5.540 | 3.352 | 6.122 | 6.193 | 0.636 | 0.606 |
| 5.119 | 5.969 | 3.762 | 6.489 | 5.985 | 0.610 | 0.606 |
| 7.496 | 8.567 | 8.460 | 9.145 | 8.796 | 0.598 | 0.606 |
| 6.650 | 7.418 | 5.889 | 8.330 | 8.049 | 0.570 | 0.606 |
| 5.483 | 7.217 | 4.274 | 7.639 | 7.603 | 0.719 | 0.606 |
| 3.462 | 4.512 | 3.172 | 4.824 | 4.952 | 0.576 | 0.606 |
| 3.888 | 5.300 | 3.035 | 5.358 | 5.057 | 0.562 | 0.606 |
| 4.310 | 4.067 | 4.688 | 3.938 | 3.935 | 0.382 | 0.606 |
| 3.076 | 2.578 | 4.024 | 2.855 | 3.263 | 0.457 | 0.606 |
| 2.760 | 2.505 | 2.668 | 2.024 | 2.801 | 0.423 | 0.606 |
| 4.110 | 3.765 | 4.096 | 3.252 | 4.577 | 0.422 | 0.606 |
| 7.999 | 6.793 | 7.036 | 5.827 | 6.049 | 0.516 | 0.606 |
| 3.590 | 3.872 | 3.908 | 2.754 | 3.215 | 0.461 | 0.606 |
| 3.538 | 3.659 | 3.822 | 2.607 | 3.001 | 0.470 | 0.606 |
| 3.496 | 3.650 | 3.777 | 2.750 | 3.010 | 0.470 | 0.606 |
| 3.420 | 3.574 | 3.645 | 2.698 | 2.877 | 0.496 | 0.606 |
| 3.305 | 3.488 | 3.625 | 2.582 | 2.936 | 0.466 | 0.606 |
| 3.400 | 3.550 | 3.734 | 2.613 | 2.905 | 0.485 | 0.606 |
| 1.569 | 2.379 | 2.431 | 1.888 | 2.181 | 0.510 | 0.606 |
| 5.424 | 5.106 | 6.056 | 4.416 | 5.424 | 0.413 | 0.606 |
| 2.942 | 3.491 | 3.124 | 3.130 | 3.519 | 0.389 | 0.606 |
| 5.797 | 5.359 | 5.593 | 5.248 | 4.982 | 0.350 | 0.606 |
| 3.860 | 4.268 | 3.628 | 4.103 | 4.568 | 0.578 | 0.606 |
| 5.761 | 5.752 | 6.115 | 5.069 | 4.968 | 0.410 | 0.606 |
| 3.571 | 3.028 | 4.577 | 2.090 | 3.013 | 1.218 | 0.606 |
| 6.205 | 6.039 | 6.845 | 6.124 | 6.387 | 0.433 | 0.606 |
| 2.246 | 1.633 | 3.366 | 1.541 | 1.677 | 0.705 | 0.606 |
| 2.470 | 2.043 | 2.254 | 2.593 | 3.069 | 0.570 | 0.606 |
| 5.207 | 5.006 | 6.023 | 5.348 | 4.975 | 0.488 | 0.606 |
| 5.821 | 6.216 | 4.759 | 6.891 | 7.045 | 0.536 | 0.606 |
| 7.737 | 5.978 | 6.348 | 6.537 | 6.145 | 0.525 | 0.606 |
| 3.598 | 4.427 | 2.912 | 3.880 | 4.398 | 0.466 | 0.606 |
| 3.606 | 4.469 | 2.467 | 4.373 | 4.137 | 0.524 | 0.606 |
| 4.466 | 4.283 | 4.589 | 3.400 | 4.556 | 0.433 | 0.606 |
| 6.458 | 6.142 | 7.269 | 4.801 | 5.973 | 0.741 | 0.606 |
| 1.109 | 3.794 | 2.009 | 4.609 | 4.716 | 0.789 | 0.606 |
| 2.881 | 3.182 | 4.007 | 2.661 | 3.005 | 0.478 | 0.606 |
| 3.752 | 3.770 | 3.781 | 3.169 | 3.735 | 0.373 | 0.606 |
| 4.901 | 6.072 | 5.702 | 4.983 | 5.194 | 0.560 | 0.606 |
| 4.510 | 4.574 | 3.208 | 4.421 | 4.228 | 0.419 | 0.606 |
| 4.540 | 4.037 | 3.753 | 4.164 | 4.290 | 0.530 | 0.606 |
| 5.916 | 6.195 | 5.534 | 6.269 | 6.399 | 0.388 | 0.606 |
| 1.061 | 2.970 | 0.661 | 3.509 | 2.959 | 0.702 | 0.606 |
| 4.988 | 4.963 | 5.346 | 5.392 | 4.749 | 0.360 | 0.606 |
| 4.395 | 4.579 | 3.240 | 5.185 | 4.766 | 0.438 | 0.606 |
| 3.985 | 3.854 | 4.713 | 3.645 | 4.085 | 0.446 | 0.606 |
| 3.289 | 3.091 | 4.046 | 2.531 | 3.015 | 0.527 | 0.606 |
| 4.676 | 7.269 | 6.618 | 6.484 | 7.110 | 0.834 | 0.606 |

|       |       |        |       |       |       |       |
|-------|-------|--------|-------|-------|-------|-------|
| 4.439 | 4.949 | 4.440  | 3.686 | 4.366 | 0.847 | 0.606 |
| 3.281 | 3.927 | 3.299  | 4.484 | 4.297 | 0.359 | 0.606 |
| 2.838 | 5.561 | 2.791  | 6.156 | 6.042 | 0.807 | 0.606 |
| 5.153 | 4.337 | 5.386  | 3.984 | 3.738 | 0.422 | 0.606 |
| 4.804 | 5.626 | 4.554  | 6.010 | 5.712 | 0.522 | 0.606 |
| 4.123 | 4.044 | 3.429  | 3.945 | 4.194 | 0.381 | 0.606 |
| 3.522 | 2.082 | 2.009  | 2.544 | 2.344 | 0.651 | 0.606 |
| 7.960 | 1.609 | 2.063  | 2.203 | 2.101 | 1.286 | 0.606 |
| 2.919 | 3.001 | 2.362  | 3.322 | 3.271 | 0.359 | 0.606 |
| 2.664 | 3.237 | 2.140  | 3.712 | 3.326 | 0.403 | 0.606 |
| 2.444 | 3.544 | 2.658  | 3.225 | 2.862 | 0.452 | 0.606 |
| 6.784 | 7.281 | 6.010  | 7.305 | 7.074 | 0.388 | 0.606 |
| 1.838 | 2.203 | 2.075  | 2.291 | 3.048 | 0.399 | 0.606 |
| 4.314 | 4.417 | 4.333  | 4.459 | 4.618 | 0.517 | 0.606 |
| 3.317 | 3.476 | 3.281  | 3.415 | 2.804 | 0.391 | 0.606 |
| 1.620 | 2.979 | 3.152  | 3.023 | 2.703 | 0.543 | 0.606 |
| 4.762 | 3.892 | 5.267  | 3.684 | 3.945 | 0.575 | 0.606 |
| 8.891 | 7.768 | 9.362  | 4.989 | 6.407 | 0.900 | 0.606 |
| 7.672 | 7.495 | 5.793  | 7.389 | 7.308 | 0.431 | 0.606 |
| 5.890 | 6.030 | 4.003  | 6.122 | 5.977 | 0.524 | 0.606 |
| 4.217 | 4.821 | 2.473  | 5.751 | 3.710 | 0.699 | 0.606 |
| 6.770 | 7.099 | 6.809  | 6.987 | 6.749 | 0.350 | 0.606 |
| 3.472 | 2.362 | 2.227  | 3.457 | 3.629 | 0.406 | 0.606 |
| 4.418 | 4.412 | 3.857  | 4.377 | 4.558 | 0.353 | 0.606 |
| 6.136 | 5.632 | 7.450  | 5.770 | 5.928 | 0.422 | 0.606 |
| 3.721 | 2.440 | 3.464  | 3.059 | 3.128 | 0.589 | 0.606 |
| 6.536 | 6.631 | 5.283  | 7.012 | 7.069 | 0.478 | 0.606 |
| 2.808 | 2.514 | 3.283  | 2.213 | 2.627 | 0.438 | 0.606 |
| 5.926 | 5.791 | 6.784  | 5.186 | 5.531 | 0.412 | 0.606 |
| 1.623 | 1.742 | 1.761  | 1.773 | 1.366 | 0.393 | 0.606 |
| 8.650 | 8.766 | 10.028 | 6.715 | 7.189 | 0.663 | 0.606 |
| 2.998 | 6.549 | 2.579  | 6.425 | 6.683 | 0.995 | 0.606 |
| 9.970 | 9.033 | 9.765  | 9.069 | 9.302 | 0.383 | 0.606 |
| 3.482 | 3.590 | 2.835  | 2.622 | 2.954 | 0.532 | 0.606 |
| 3.233 | 3.756 | 2.664  | 4.312 | 4.381 | 0.527 | 0.606 |
| 2.349 | 2.067 | 2.865  | 1.821 | 2.025 | 0.364 | 0.606 |
| 2.993 | 3.085 | 3.867  | 2.748 | 2.403 | 0.423 | 0.606 |
| 5.542 | 5.031 | 5.568  | 5.417 | 5.183 | 0.357 | 0.606 |
| 5.140 | 6.178 | 5.260  | 6.973 | 6.345 | 0.587 | 0.606 |
| 7.924 | 8.580 | 8.511  | 9.010 | 8.690 | 0.359 | 0.606 |
| 3.317 | 2.970 | 3.256  | 2.481 | 3.659 | 0.490 | 0.606 |
| 5.110 | 5.959 | 5.075  | 6.183 | 5.942 | 0.539 | 0.606 |
| 7.622 | 6.639 | 9.023  | 5.967 | 6.038 | 0.625 | 0.606 |
| 4.556 | 4.698 | 4.839  | 3.531 | 4.368 | 0.459 | 0.606 |
| 4.845 | 4.556 | 4.003  | 4.763 | 4.337 | 0.364 | 0.606 |
| 4.052 | 4.284 | 4.222  | 4.202 | 4.511 | 0.429 | 0.606 |
| 5.406 | 5.967 | 5.025  | 5.986 | 6.299 | 0.363 | 0.606 |
| 6.345 | 7.061 | 6.632  | 6.668 | 6.176 | 0.461 | 0.606 |
| 9.052 | 9.090 | 7.800  | 9.296 | 9.130 | 0.415 | 0.606 |
| 3.387 | 3.499 | 3.951  | 3.579 | 3.596 | 0.598 | 0.606 |

|       |       |       |       |       |       |       |
|-------|-------|-------|-------|-------|-------|-------|
| 9.123 | 9.082 | 6.644 | 9.503 | 9.324 | 0.695 | 0.606 |
| 7.710 | 8.468 | 7.085 | 8.767 | 8.616 | 0.467 | 0.606 |
| 4.775 | 4.843 | 4.140 | 5.831 | 5.134 | 0.461 | 0.606 |
| 5.820 | 5.906 | 5.542 | 6.156 | 5.668 | 0.400 | 0.606 |
| 5.359 | 6.458 | 4.817 | 6.693 | 6.365 | 0.458 | 0.606 |
| 4.253 | 4.105 | 5.190 | 3.303 | 3.819 | 0.454 | 0.606 |
| 3.648 | 3.936 | 3.966 | 3.565 | 3.686 | 0.397 | 0.606 |
| 3.912 | 4.307 | 3.423 | 3.756 | 3.591 | 0.381 | 0.606 |
| 3.786 | 4.142 | 5.733 | 3.186 | 4.027 | 0.886 | 0.606 |
| 4.774 | 4.435 | 5.414 | 4.272 | 4.320 | 0.682 | 0.606 |
| 5.333 | 5.497 | 2.710 | 5.615 | 5.871 | 0.683 | 0.606 |
| 7.828 | 7.223 | 7.650 | 6.654 | 6.726 | 0.340 | 0.606 |
| 2.303 | 2.268 | 2.449 | 2.140 | 2.229 | 0.432 | 0.606 |
| 4.787 | 5.453 | 4.754 | 5.198 | 5.355 | 0.427 | 0.606 |
| 8.829 | 8.061 | 9.490 | 7.591 | 7.614 | 0.457 | 0.606 |
| 8.246 | 7.313 | 8.651 | 7.294 | 7.158 | 0.405 | 0.606 |
| 6.963 | 6.609 | 5.281 | 7.411 | 7.115 | 0.458 | 0.606 |
| 6.235 | 5.331 | 6.458 | 5.308 | 5.000 | 0.442 | 0.606 |
| 8.647 | 7.813 | 9.298 | 7.464 | 7.393 | 0.453 | 0.606 |
| 8.035 | 7.585 | 2.725 | 7.978 | 8.011 | 1.238 | 0.606 |
| 4.527 | 4.149 | 4.840 | 4.335 | 4.693 | 0.362 | 0.606 |
| 6.227 | 5.983 | 4.393 | 6.131 | 6.365 | 0.465 | 0.606 |
| 3.162 | 2.597 | 1.482 | 2.785 | 2.564 | 0.609 | 0.606 |
| 3.470 | 4.918 | 3.070 | 4.750 | 4.980 | 0.522 | 0.606 |
| 5.107 | 4.975 | 4.625 | 5.339 | 5.171 | 0.324 | 0.606 |
| 2.666 | 2.897 | 2.666 | 2.859 | 2.285 | 0.432 | 0.606 |
| 4.050 | 3.651 | 4.242 | 4.439 | 4.664 | 0.398 | 0.606 |
| 4.905 | 4.332 | 3.333 | 3.640 | 3.730 | 0.495 | 0.606 |
| 6.443 | 6.614 | 4.364 | 6.946 | 6.741 | 0.602 | 0.606 |
| 6.433 | 6.516 | 5.394 | 6.664 | 6.796 | 0.400 | 0.606 |
| 6.426 | 5.984 | 6.696 | 5.463 | 5.808 | 0.360 | 0.606 |
| 4.338 | 4.593 | 4.705 | 4.158 | 4.359 | 0.371 | 0.606 |
| 5.136 | 5.354 | 3.911 | 5.237 | 5.643 | 0.436 | 0.606 |
| 3.835 | 3.777 | 4.207 | 3.840 | 3.466 | 0.467 | 0.606 |
| 5.195 | 5.846 | 4.906 | 5.924 | 6.420 | 0.374 | 0.606 |
| 2.820 | 2.368 | 2.320 | 2.290 | 2.758 | 0.474 | 0.606 |
| 3.538 | 4.225 | 1.970 | 3.616 | 4.022 | 0.525 | 0.606 |
| 5.241 | 4.379 | 6.187 | 4.255 | 4.119 | 0.638 | 0.606 |
| 3.497 | 5.447 | 2.522 | 5.132 | 5.239 | 0.721 | 0.606 |
| 8.020 | 7.294 | 7.705 | 7.631 | 7.462 | 0.338 | 0.606 |
| 6.785 | 6.483 | 7.566 | 5.887 | 6.217 | 0.405 | 0.606 |
| 2.975 | 2.903 | 2.300 | 2.494 | 1.892 | 0.450 | 0.606 |
| 6.215 | 6.396 | 4.936 | 6.811 | 6.599 | 0.434 | 0.606 |
| 5.907 | 6.305 | 4.796 | 6.086 | 6.116 | 0.378 | 0.606 |
| 1.478 | 4.871 | 1.100 | 5.476 | 6.102 | 1.072 | 0.606 |
| 4.182 | 3.924 | 4.524 | 3.193 | 3.885 | 0.585 | 0.606 |
| 6.759 | 6.507 | 3.738 | 6.594 | 6.173 | 0.735 | 0.606 |
| 7.522 | 8.675 | 7.471 | 8.880 | 8.562 | 0.484 | 0.606 |
| 4.804 | 5.273 | 3.822 | 5.512 | 5.487 | 0.441 | 0.606 |
| 3.854 | 4.165 | 3.781 | 4.475 | 4.889 | 0.485 | 0.606 |

|       |       |       |       |       |       |       |
|-------|-------|-------|-------|-------|-------|-------|
| 7.732 | 7.515 | 8.444 | 7.460 | 7.274 | 0.421 | 0.606 |
| 3.697 | 5.018 | 3.043 | 5.026 | 4.888 | 0.492 | 0.606 |
| 2.862 | 2.708 | 3.383 | 1.839 | 1.967 | 0.474 | 0.606 |
| 3.341 | 3.044 | 2.911 | 2.898 | 2.844 | 0.320 | 0.606 |
| 3.061 | 3.522 | 2.602 | 1.787 | 3.482 | 0.594 | 0.606 |
| 5.935 | 5.994 | 6.690 | 5.635 | 5.063 | 0.383 | 0.606 |
| 2.113 | 1.596 | 2.721 | 2.221 | 2.452 | 0.465 | 0.606 |
| 4.421 | 5.345 | 4.692 | 6.046 | 5.490 | 0.488 | 0.606 |
| 3.864 | 3.914 | 3.807 | 3.251 | 3.617 | 0.378 | 0.606 |
| 4.038 | 4.086 | 3.788 | 4.820 | 4.014 | 0.410 | 0.606 |
| 5.119 | 5.473 | 5.077 | 5.858 | 5.878 | 0.366 | 0.606 |
| 3.937 | 3.090 | 5.031 | 2.514 | 3.802 | 0.614 | 0.606 |
| 6.282 | 4.173 | 5.849 | 2.981 | 3.171 | 0.912 | 0.606 |
| 5.430 | 5.699 | 4.776 | 5.729 | 5.327 | 0.351 | 0.606 |
| 7.153 | 6.110 | 7.472 | 6.189 | 6.226 | 0.381 | 0.606 |
| 5.953 | 6.266 | 6.039 | 6.585 | 6.657 | 0.322 | 0.606 |
| 6.609 | 7.127 | 7.240 | 6.975 | 7.473 | 0.453 | 0.606 |
| 3.505 | 3.761 | 1.628 | 4.248 | 4.095 | 0.706 | 0.606 |
| 4.918 | 3.467 | 3.377 | 2.456 | 3.308 | 0.570 | 0.606 |
| 4.648 | 5.670 | 4.180 | 6.269 | 5.530 | 0.513 | 0.606 |
| 5.438 | 4.854 | 5.042 | 5.280 | 5.464 | 0.397 | 0.606 |
| 2.209 | 3.068 | 2.873 | 1.934 | 2.034 | 0.758 | 0.606 |
| 5.663 | 5.174 | 3.120 | 5.464 | 5.720 | 0.629 | 0.606 |
| 6.551 | 6.963 | 5.603 | 7.143 | 7.280 | 0.463 | 0.606 |
| 2.841 | 4.077 | 2.335 | 3.135 | 4.783 | 0.574 | 0.606 |
| 3.938 | 4.790 | 2.853 | 4.914 | 4.686 | 0.543 | 0.606 |
| 0.904 | 5.569 | 1.006 | 5.651 | 6.285 | 1.235 | 0.606 |
| 7.188 | 7.081 | 7.361 | 6.419 | 6.866 | 0.361 | 0.606 |
| 5.274 | 5.829 | 4.991 | 5.871 | 6.419 | 0.414 | 0.606 |
| 4.506 | 4.569 | 5.027 | 2.985 | 3.645 | 0.662 | 0.606 |
| 4.266 | 5.329 | 4.783 | 5.006 | 5.339 | 0.426 | 0.606 |
| 5.013 | 4.596 | 5.089 | 3.677 | 4.024 | 0.428 | 0.606 |
| 4.404 | 4.513 | 5.186 | 4.300 | 4.721 | 0.363 | 0.606 |
| 5.436 | 6.164 | 4.215 | 6.477 | 6.756 | 0.611 | 0.606 |
| 2.907 | 2.638 | 2.407 | 3.000 | 3.191 | 0.489 | 0.606 |
| 5.087 | 5.336 | 4.678 | 5.549 | 5.553 | 0.357 | 0.606 |
| 3.085 | 2.358 | 2.453 | 1.887 | 2.438 | 0.440 | 0.606 |
| 5.213 | 5.356 | 3.661 | 5.658 | 5.534 | 0.467 | 0.606 |
| 7.512 | 7.550 | 6.201 | 7.825 | 8.074 | 0.454 | 0.606 |
| 3.995 | 3.428 | 2.316 | 3.935 | 4.210 | 0.491 | 0.606 |
| 3.880 | 4.344 | 4.471 | 3.969 | 4.864 | 0.414 | 0.606 |
| 3.702 | 4.067 | 4.445 | 3.760 | 3.981 | 0.485 | 0.606 |
| 6.595 | 5.827 | 6.980 | 5.651 | 5.913 | 0.378 | 0.606 |
| 5.374 | 5.834 | 3.828 | 5.705 | 5.782 | 0.444 | 0.606 |
| 6.634 | 6.647 | 6.193 | 6.879 | 7.132 | 0.312 | 0.606 |
| 5.422 | 6.468 | 5.072 | 6.884 | 6.668 | 0.454 | 0.606 |
| 2.450 | 2.637 | 2.307 | 2.806 | 2.708 | 0.442 | 0.606 |
| 5.433 | 6.017 | 5.563 | 6.058 | 5.793 | 0.311 | 0.606 |
| 2.234 | 4.139 | 2.423 | 2.168 | 3.158 | 0.857 | 0.606 |
| 3.028 | 5.874 | 3.249 | 6.220 | 6.218 | 0.740 | 0.606 |



|       |       |       |       |       |       |       |
|-------|-------|-------|-------|-------|-------|-------|
| 6.480 | 7.510 | 6.491 | 7.533 | 7.387 | 0.378 | 0.606 |
| 7.368 | 6.674 | 2.782 | 8.044 | 6.633 | 1.277 | 0.606 |
| 5.740 | 5.357 | 4.014 | 5.827 | 5.766 | 0.525 | 0.606 |
| 5.314 | 4.378 | 3.075 | 4.879 | 5.024 | 0.558 | 0.606 |
| 8.161 | 6.852 | 8.799 | 6.992 | 7.141 | 0.513 | 0.606 |
| 4.974 | 3.752 | 4.922 | 3.336 | 3.693 | 0.497 | 0.606 |
| 5.253 | 4.186 | 3.667 | 3.502 | 5.065 | 0.547 | 0.606 |
| 3.329 | 2.489 | 2.342 | 2.801 | 3.337 | 0.526 | 0.606 |
| 0.829 | 5.031 | 1.256 | 4.606 | 4.074 | 0.960 | 0.606 |
| 2.330 | 2.944 | 2.944 | 3.103 | 3.609 | 0.470 | 0.606 |
| 4.947 | 5.184 | 3.582 | 5.151 | 5.052 | 0.505 | 0.606 |
| 5.080 | 6.020 | 5.548 | 6.688 | 5.349 | 0.668 | 0.606 |
| 5.189 | 5.405 | 4.696 | 5.482 | 5.633 | 0.333 | 0.606 |
| 6.496 | 5.899 | 6.701 | 5.462 | 5.828 | 0.488 | 0.606 |
| 3.137 | 3.802 | 3.956 | 3.910 | 3.629 | 0.494 | 0.606 |
| 2.770 | 2.475 | 2.361 | 2.886 | 3.430 | 0.449 | 0.606 |
| 4.808 | 5.308 | 5.875 | 5.324 | 5.795 | 0.366 | 0.606 |
| 3.758 | 4.437 | 4.167 | 4.477 | 4.420 | 0.401 | 0.606 |
| 3.766 | 3.072 | 4.201 | 2.946 | 3.309 | 0.419 | 0.606 |
| 4.581 | 4.483 | 5.772 | 4.500 | 4.553 | 0.418 | 0.606 |
| 3.749 | 3.256 | 3.524 | 3.569 | 3.681 | 0.344 | 0.606 |
| 6.035 | 6.180 | 6.088 | 6.240 | 6.280 | 0.350 | 0.606 |
| 8.293 | 7.814 | 8.752 | 7.565 | 8.268 | 0.431 | 0.606 |
| 2.463 | 4.451 | 4.296 | 3.414 | 4.941 | 0.559 | 0.606 |
| 1.930 | 2.751 | 2.023 | 3.011 | 3.057 | 0.370 | 0.606 |
| 5.119 | 5.636 | 5.542 | 5.704 | 5.745 | 0.371 | 0.606 |
| 3.898 | 2.786 | 4.234 | 2.236 | 2.240 | 0.653 | 0.606 |
| 3.859 | 4.129 | 3.170 | 4.974 | 4.890 | 0.556 | 0.606 |
| 3.740 | 3.329 | 3.398 | 3.564 | 4.679 | 0.501 | 0.606 |
| 1.737 | 2.380 | 2.728 | 1.838 | 2.141 | 0.566 | 0.606 |
| 2.927 | 3.254 | 3.452 | 2.758 | 2.607 | 0.455 | 0.606 |
| 4.199 | 3.495 | 3.873 | 3.171 | 3.923 | 0.446 | 0.606 |
| 4.069 | 4.529 | 3.497 | 3.963 | 4.093 | 0.399 | 0.606 |
| 5.999 | 7.976 | 4.451 | 8.396 | 7.909 | 0.808 | 0.606 |
| 3.043 | 3.676 | 3.686 | 2.887 | 2.941 | 0.412 | 0.606 |
| 4.249 | 3.914 | 3.146 | 4.192 | 3.902 | 0.419 | 0.606 |
| 4.221 | 4.841 | 4.634 | 4.135 | 4.082 | 0.355 | 0.606 |
| 5.687 | 6.522 | 6.171 | 6.638 | 6.356 | 0.362 | 0.606 |
| 4.607 | 4.706 | 4.066 | 4.968 | 5.188 | 0.478 | 0.606 |
| 3.699 | 6.523 | 2.404 | 6.703 | 6.296 | 0.864 | 0.606 |
| 2.934 | 0.994 | 1.959 | 2.512 | 2.438 | 0.520 | 0.606 |
| 3.277 | 3.006 | 4.079 | 2.049 | 1.788 | 0.581 | 0.606 |
| 3.575 | 3.113 | 4.180 | 3.988 | 3.404 | 0.472 | 0.606 |
| 5.080 | 4.246 | 6.426 | 3.454 | 3.651 | 0.662 | 0.606 |
| 1.562 | 2.050 | 2.286 | 1.514 | 0.945 | 0.591 | 0.606 |
| 5.314 | 4.960 | 4.997 | 4.940 | 5.261 | 0.419 | 0.606 |
| 2.452 | 2.573 | 3.441 | 3.505 | 3.473 | 0.483 | 0.606 |
| 5.077 | 5.768 | 5.127 | 6.042 | 5.653 | 0.361 | 0.606 |
| 4.515 | 3.597 | 6.538 | 3.608 | 3.859 | 0.788 | 0.606 |
| 6.181 | 5.207 | 6.492 | 4.896 | 5.407 | 0.447 | 0.606 |

|       |       |       |       |       |       |       |
|-------|-------|-------|-------|-------|-------|-------|
| 3.175 | 4.432 | 3.550 | 4.510 | 4.647 | 0.400 | 0.606 |
| 4.480 | 4.109 | 5.529 | 3.823 | 4.630 | 0.411 | 0.606 |
| 3.907 | 5.010 | 4.406 | 4.826 | 5.490 | 0.666 | 0.606 |
| 4.497 | 5.028 | 4.901 | 4.111 | 4.573 | 0.388 | 0.606 |
| 3.674 | 3.350 | 4.496 | 3.464 | 3.933 | 0.429 | 0.606 |
| 3.629 | 4.515 | 4.340 | 4.504 | 4.417 | 0.415 | 0.606 |
| 3.663 | 4.521 | 4.220 | 4.531 | 4.439 | 0.415 | 0.606 |
| 3.270 | 5.520 | 3.557 | 5.770 | 5.496 | 0.643 | 0.606 |
| 4.922 | 3.861 | 5.150 | 2.668 | 3.594 | 0.533 | 0.606 |
| 3.313 | 2.765 | 3.274 | 2.825 | 3.362 | 0.423 | 0.606 |
| 6.407 | 6.531 | 6.233 | 6.772 | 6.913 | 0.319 | 0.606 |
| 5.022 | 5.610 | 4.660 | 5.734 | 5.988 | 0.451 | 0.606 |
| 7.210 | 6.895 | 7.321 | 6.277 | 5.665 | 0.431 | 0.606 |
| 5.884 | 6.482 | 6.302 | 5.552 | 5.799 | 0.395 | 0.606 |
| 4.549 | 4.471 | 5.227 | 3.621 | 4.432 | 0.443 | 0.606 |
| 4.116 | 2.430 | 3.858 | 2.817 | 2.277 | 0.598 | 0.606 |
| 3.202 | 2.108 | 2.329 | 3.174 | 2.169 | 0.451 | 0.606 |
| 2.225 | 2.701 | 2.704 | 2.840 | 2.680 | 0.445 | 0.606 |
| 3.419 | 3.433 | 2.300 | 3.003 | 3.063 | 0.572 | 0.606 |
| 5.015 | 5.889 | 4.956 | 5.273 | 5.358 | 0.360 | 0.606 |
| 4.231 | 4.133 | 4.930 | 3.626 | 3.915 | 0.726 | 0.606 |
| 2.341 | 2.336 | 2.603 | 2.977 | 2.874 | 0.461 | 0.606 |
| 2.515 | 1.433 | 2.728 | 1.646 | 2.564 | 0.542 | 0.606 |
| 2.738 | 3.683 | 4.002 | 3.222 | 3.597 | 0.469 | 0.606 |
| 3.957 | 1.685 | 3.538 | 2.765 | 2.809 | 0.737 | 0.606 |
| 2.758 | 3.624 | 3.584 | 4.484 | 2.680 | 0.646 | 0.606 |
| 4.010 | 4.877 | 4.477 | 3.850 | 3.962 | 0.552 | 0.606 |
| 4.709 | 6.419 | 3.041 | 6.687 | 6.965 | 0.858 | 0.606 |
| 3.447 | 2.814 | 5.079 | 3.862 | 3.816 | 0.816 | 0.606 |
| 3.026 | 3.973 | 4.676 | 3.280 | 3.673 | 0.533 | 0.606 |
| 3.667 | 4.116 | 4.711 | 2.145 | 2.512 | 0.604 | 0.606 |
| 3.071 | 2.723 | 1.825 | 2.614 | 1.994 | 0.553 | 0.606 |
| 3.594 | 3.800 | 3.411 | 3.431 | 3.098 | 0.523 | 0.606 |
| 2.659 | 2.872 | 3.746 | 2.403 | 3.029 | 0.439 | 0.606 |
| 4.769 | 4.804 | 5.303 | 3.698 | 4.528 | 0.454 | 0.606 |
| 4.357 | 2.546 | 4.875 | 3.779 | 3.967 | 0.692 | 0.606 |
| 6.892 | 5.649 | 6.808 | 6.717 | 6.533 | 0.524 | 0.606 |
| 2.387 | 3.737 | 3.046 | 3.559 | 3.619 | 0.513 | 0.606 |
| 3.086 | 3.191 | 2.054 | 3.867 | 3.383 | 0.485 | 0.606 |
| 2.082 | 2.231 | 1.636 | 3.057 | 3.350 | 0.449 | 0.606 |
| 2.521 | 3.331 | 3.137 | 2.880 | 2.901 | 0.437 | 0.606 |
| 1.710 | 2.949 | 1.824 | 1.889 | 2.034 | 0.590 | 0.606 |
| 2.430 | 3.094 | 2.159 | 2.436 | 2.708 | 0.600 | 0.606 |
| 3.970 | 2.337 | 4.360 | 3.056 | 2.785 | 0.696 | 0.606 |
| 3.404 | 3.205 | 2.698 | 3.022 | 2.092 | 0.470 | 0.606 |
| 4.099 | 3.907 | 3.736 | 4.128 | 4.363 | 0.388 | 0.606 |
| 1.850 | 2.288 | 3.574 | 1.486 | 2.187 | 0.863 | 0.606 |
| 5.223 | 4.367 | 6.247 | 4.249 | 4.588 | 0.499 | 0.606 |
| 2.395 | 2.718 | 4.995 | 2.937 | 4.528 | 0.729 | 0.606 |
| 2.621 | 3.038 | 2.615 | 3.629 | 2.797 | 0.475 | 0.606 |

|       |       |       |       |       |       |       |
|-------|-------|-------|-------|-------|-------|-------|
| 4.501 | 3.610 | 4.191 | 3.877 | 3.823 | 0.433 | 0.606 |
| 3.252 | 2.402 | 2.089 | 1.992 | 2.667 | 0.502 | 0.606 |
| 4.608 | 3.672 | 4.445 | 3.444 | 3.455 | 0.428 | 0.606 |
| 4.306 | 3.574 | 3.839 | 3.334 | 2.891 | 0.480 | 0.606 |
| 2.546 | 2.490 | 2.513 | 2.897 | 2.012 | 0.565 | 0.606 |
| 5.023 | 4.746 | 4.709 | 5.150 | 5.601 | 0.589 | 0.606 |
| 2.292 | 4.360 | 2.769 | 2.748 | 2.282 | 0.684 | 0.606 |
| 5.531 | 3.889 | 7.673 | 3.673 | 4.250 | 0.862 | 0.606 |
| 3.410 | 2.507 | 5.086 | 2.850 | 2.790 | 0.554 | 0.606 |
| 2.846 | 1.858 | 3.006 | 2.655 | 2.389 | 0.446 | 0.606 |
| 3.031 | 3.187 | 2.577 | 3.412 | 3.605 | 0.392 | 0.606 |
| 3.265 | 2.932 | 5.182 | 3.007 | 3.708 | 0.578 | 0.606 |
| 1.741 | 1.495 | 1.289 | 2.491 | 1.743 | 0.422 | 0.606 |
| 1.115 | 1.794 | 1.881 | 2.913 | 2.117 | 0.523 | 0.606 |
| 2.537 | 2.782 | 1.838 | 2.841 | 3.340 | 0.487 | 0.606 |
| 1.255 | 2.435 | 4.526 | 2.290 | 2.701 | 0.678 | 0.606 |
| 3.308 | 3.853 | 4.703 | 4.520 | 4.109 | 0.637 | 0.606 |
| 1.944 | 3.736 | 2.648 | 2.632 | 2.007 | 0.464 | 0.606 |
| 4.962 | 3.642 | 5.356 | 3.656 | 3.830 | 0.673 | 0.606 |
| 3.047 | 2.700 | 3.314 | 3.299 | 3.169 | 0.429 | 0.606 |
| 2.833 | 2.597 | 2.098 | 2.744 | 1.436 | 0.623 | 0.606 |
| 3.645 | 2.765 | 3.645 | 3.718 | 3.697 | 0.632 | 0.606 |
| 3.079 | 2.209 | 4.039 | 2.319 | 2.049 | 0.485 | 0.606 |
| 3.368 | 5.408 | 4.260 | 3.632 | 3.864 | 0.600 | 0.606 |
| 1.382 | 0.566 | 1.349 | 0.946 | 1.350 | 0.595 | 0.606 |
| 3.383 | 3.656 | 3.102 | 2.826 | 3.604 | 0.430 | 0.606 |
| 2.056 | 3.633 | 2.388 | 2.662 | 3.458 | 0.563 | 0.606 |
| 2.767 | 2.036 | 3.968 | 3.032 | 2.721 | 0.586 | 0.606 |
| 3.742 | 2.792 | 3.065 | 3.016 | 3.074 | 0.454 | 0.606 |
| 4.547 | 4.361 | 4.504 | 4.689 | 4.734 | 0.424 | 0.606 |
| 2.917 | 3.792 | 2.622 | 3.168 | 4.032 | 0.443 | 0.606 |
| 2.720 | 2.821 | 1.742 | 3.089 | 3.139 | 0.585 | 0.606 |
| 2.895 | 2.927 | 3.551 | 3.611 | 3.985 | 0.508 | 0.606 |
| 3.360 | 3.452 | 3.168 | 3.814 | 3.360 | 0.454 | 0.606 |
| 2.107 | 3.574 | 2.507 | 3.819 | 3.769 | 0.605 | 0.606 |
| 2.521 | 2.532 | 2.580 | 2.313 | 2.896 | 0.478 | 0.606 |
| 3.473 | 3.663 | 3.257 | 4.076 | 3.727 | 0.478 | 0.606 |
| 3.941 | 4.489 | 4.478 | 4.484 | 4.253 | 0.477 | 0.606 |
| 3.570 | 3.835 | 4.692 | 3.485 | 2.536 | 0.505 | 0.606 |
| 3.365 | 3.768 | 3.835 | 3.960 | 4.104 | 0.521 | 0.606 |
| 2.813 | 3.779 | 3.315 | 3.117 | 2.892 | 0.631 | 0.606 |
| 3.606 | 5.569 | 4.592 | 5.122 | 3.954 | 0.529 | 0.606 |
| 0.923 | 3.073 | 1.653 | 1.857 | 2.408 | 0.503 | 0.606 |
| 3.360 | 3.272 | 3.064 | 3.198 | 2.734 | 0.621 | 0.606 |
| 4.085 | 3.099 | 4.060 | 3.608 | 3.262 | 0.528 | 0.606 |
| 3.567 | 4.880 | 4.104 | 4.254 | 3.921 | 0.389 | 0.606 |
| 3.199 | 2.086 | 4.545 | 2.365 | 2.543 | 0.585 | 0.606 |
| 3.587 | 3.788 | 2.887 | 3.420 | 3.556 | 0.442 | 0.606 |
| 1.807 | 2.956 | 2.818 | 2.826 | 3.534 | 0.514 | 0.606 |
| 3.057 | 3.228 | 4.151 | 3.498 | 2.634 | 0.523 | 0.606 |

|       |       |       |       |       |       |       |
|-------|-------|-------|-------|-------|-------|-------|
| 2.417 | 2.779 | 2.798 | 2.812 | 2.790 | 0.468 | 0.606 |
| 4.708 | 5.385 | 5.888 | 5.808 | 5.457 | 0.445 | 0.606 |
| 2.154 | 2.444 | 1.619 | 1.791 | 2.177 | 0.501 | 0.606 |
| 2.657 | 2.003 | 1.910 | 2.324 | 2.242 | 0.423 | 0.606 |
| 4.057 | 3.721 | 3.868 | 3.516 | 3.003 | 0.394 | 0.606 |
| 2.930 | 1.952 | 2.440 | 2.923 | 1.999 | 0.506 | 0.606 |
| 5.044 | 3.286 | 4.119 | 3.083 | 2.958 | 0.553 | 0.606 |
| 5.485 | 5.243 | 5.420 | 4.330 | 4.720 | 0.698 | 0.606 |
| 4.117 | 3.759 | 4.433 | 4.031 | 4.214 | 0.510 | 0.606 |
| 1.809 | 1.598 | 3.151 | 3.628 | 1.691 | 0.742 | 0.606 |
| 2.995 | 2.123 | 2.370 | 1.725 | 2.530 | 0.543 | 0.606 |
| 2.829 | 2.957 | 2.770 | 2.908 | 2.776 | 0.410 | 0.606 |
| 2.331 | 2.650 | 2.668 | 2.245 | 1.988 | 0.466 | 0.606 |
| 3.840 | 2.883 | 3.700 | 3.689 | 3.981 | 0.531 | 0.606 |
| 1.977 | 1.494 | 1.913 | 1.356 | 1.980 | 0.461 | 0.606 |
| 6.242 | 5.280 | 5.537 | 5.924 | 5.377 | 0.535 | 0.606 |
| 3.178 | 4.041 | 3.670 | 3.469 | 3.156 | 0.505 | 0.606 |
| 3.412 | 2.454 | 2.535 | 2.478 | 1.586 | 0.677 | 0.606 |
| 1.896 | 4.316 | 3.390 | 2.808 | 2.215 | 0.747 | 0.606 |
| 3.221 | 2.927 | 3.549 | 2.936 | 2.278 | 0.525 | 0.606 |
| 1.083 | 3.082 | 1.844 | 1.810 | 1.916 | 0.744 | 0.606 |
| 2.158 | 2.914 | 2.979 | 3.177 | 2.124 | 0.507 | 0.606 |
| 2.444 | 2.368 | 2.672 | 3.272 | 2.231 | 0.443 | 0.606 |
| 3.644 | 3.103 | 3.775 | 2.313 | 3.827 | 0.557 | 0.606 |
| 4.514 | 3.213 | 1.701 | 4.224 | 3.910 | 0.618 | 0.606 |
| 1.398 | 1.795 | 2.254 | 1.412 | 1.784 | 0.486 | 0.606 |
| 5.158 | 4.563 | 5.566 | 4.664 | 4.390 | 0.538 | 0.606 |
| 6.280 | 4.038 | 3.280 | 4.635 | 3.655 | 0.862 | 0.606 |
| 4.051 | 1.735 | 3.658 | 1.861 | 1.112 | 0.769 | 0.606 |
| 6.478 | 5.886 | 6.084 | 6.548 | 6.400 | 0.497 | 0.606 |
| 6.429 | 6.078 | 6.317 | 6.125 | 5.833 | 0.682 | 0.606 |
| 2.981 | 3.652 | 2.720 | 2.587 | 3.477 | 0.546 | 0.606 |
| 4.127 | 3.820 | 3.353 | 4.214 | 3.890 | 0.455 | 0.606 |
| 2.866 | 2.981 | 4.197 | 3.952 | 3.380 | 0.432 | 0.606 |
| 3.095 | 2.444 | 2.006 | 3.129 | 1.706 | 0.517 | 0.606 |
| 3.924 | 3.605 | 3.464 | 3.924 | 4.095 | 0.471 | 0.606 |
| 2.867 | 3.010 | 2.616 | 2.764 | 1.734 | 0.593 | 0.606 |
| 2.022 | 2.818 | 1.181 | 3.025 | 3.789 | 0.661 | 0.606 |
| 2.356 | 3.111 | 1.572 | 4.318 | 3.957 | 0.575 | 0.606 |
| 3.045 | 2.382 | 1.969 | 2.940 | 2.269 | 0.557 | 0.606 |
| 4.290 | 3.734 | 5.150 | 2.869 | 2.392 | 0.646 | 0.606 |
| 2.737 | 3.817 | 3.280 | 3.554 | 2.580 | 0.736 | 0.606 |
| 0.888 | 3.198 | 3.238 | 3.773 | 3.257 | 0.710 | 0.606 |
| 1.931 | 3.295 | 2.470 | 2.382 | 2.176 | 0.637 | 0.606 |
| 6.362 | 5.785 | 7.090 | 6.045 | 5.783 | 0.436 | 0.606 |
| 3.639 | 4.042 | 1.470 | 3.647 | 2.009 | 0.886 | 0.606 |
| 3.856 | 4.806 | 4.991 | 5.184 | 4.698 | 0.417 | 0.606 |
| 7.542 | 6.588 | 7.500 | 5.908 | 6.533 | 0.570 | 0.606 |
| 3.497 | 3.628 | 3.674 | 3.195 | 3.214 | 0.438 | 0.606 |
| 3.833 | 3.469 | 4.369 | 3.017 | 4.028 | 0.622 | 0.606 |

|       |       |       |       |       |       |       |
|-------|-------|-------|-------|-------|-------|-------|
| 1.844 | 2.235 | 3.386 | 1.777 | 3.031 | 0.618 | 0.606 |
| 1.076 | 2.603 | 2.787 | 1.561 | 2.269 | 0.519 | 0.606 |
| 3.408 | 2.703 | 3.060 | 3.592 | 2.607 | 0.567 | 0.606 |
| 0.864 | 1.569 | 1.508 | 1.037 | 1.093 | 0.609 | 0.606 |
| 4.143 | 5.249 | 5.235 | 4.560 | 4.377 | 0.401 | 0.606 |
| 5.161 | 4.253 | 5.063 | 3.707 | 3.773 | 0.554 | 0.606 |
| 3.049 | 3.119 | 3.827 | 2.633 | 2.766 | 0.492 | 0.606 |
| 2.758 | 2.770 | 3.170 | 2.448 | 3.150 | 0.560 | 0.606 |
| 3.960 | 4.942 | 3.080 | 5.395 | 5.170 | 0.495 | 0.606 |
| 1.496 | 1.755 | 1.140 | 2.064 | 1.966 | 0.627 | 0.606 |
| 2.853 | 3.119 | 2.546 | 2.810 | 2.810 | 0.574 | 0.606 |
| 3.134 | 3.986 | 4.402 | 3.844 | 3.262 | 0.684 | 0.606 |
| 3.839 | 3.376 | 4.310 | 3.029 | 3.444 | 0.810 | 0.606 |
| 2.475 | 3.153 | 3.362 | 1.507 | 1.925 | 0.706 | 0.606 |
| 3.758 | 3.495 | 4.376 | 3.960 | 3.207 | 0.432 | 0.606 |
| 2.771 | 3.232 | 3.587 | 3.553 | 3.926 | 0.589 | 0.606 |
| 2.678 | 2.954 | 2.643 | 2.166 | 2.134 | 0.398 | 0.606 |
| 2.075 | 2.525 | 2.409 | 1.309 | 1.968 | 0.540 | 0.606 |
| 2.358 | 2.291 | 2.763 | 2.099 | 2.635 | 0.469 | 0.606 |
| 3.465 | 2.354 | 2.798 | 2.593 | 2.163 | 0.456 | 0.606 |
| 2.317 | 2.749 | 4.082 | 2.973 | 2.595 | 0.681 | 0.606 |
| 1.253 | 1.940 | 1.943 | 1.999 | 2.174 | 0.548 | 0.606 |
| 4.265 | 4.286 | 4.625 | 4.272 | 3.997 | 0.437 | 0.606 |
| 2.736 | 2.662 | 2.764 | 3.173 | 2.748 | 0.417 | 0.606 |
| 3.679 | 2.857 | 3.969 | 3.777 | 3.289 | 0.470 | 0.606 |
| 4.013 | 3.278 | 4.149 | 3.745 | 3.007 | 0.505 | 0.606 |
| 4.825 | 3.156 | 1.816 | 1.623 | 2.853 | 0.801 | 0.606 |
| 4.608 | 2.661 | 3.597 | 2.358 | 3.221 | 0.703 | 0.606 |
| 4.531 | 2.610 | 3.620 | 2.245 | 3.029 | 0.667 | 0.606 |
| 3.612 | 2.164 | 2.250 | 2.673 | 1.868 | 0.519 | 0.606 |
| 6.239 | 4.968 | 7.277 | 4.852 | 3.865 | 0.814 | 0.606 |
| 3.146 | 2.091 | 2.641 | 3.233 | 3.401 | 0.480 | 0.606 |
| 4.197 | 1.909 | 2.610 | 3.359 | 4.121 | 0.610 | 0.606 |
| 2.154 | 2.167 | 2.649 | 2.969 | 2.752 | 0.465 | 0.606 |
| 5.700 | 6.112 | 7.195 | 6.521 | 6.549 | 0.567 | 0.606 |
| 4.270 | 3.576 | 4.795 | 4.198 | 3.941 | 0.438 | 0.606 |
| 3.096 | 2.296 | 2.657 | 2.795 | 3.394 | 0.459 | 0.606 |
| 4.625 | 4.533 | 5.003 | 4.423 | 4.794 | 0.418 | 0.606 |
| 6.095 | 4.534 | 5.310 | 4.296 | 4.348 | 0.616 | 0.606 |
| 4.366 | 2.043 | 3.671 | 1.648 | 1.611 | 0.712 | 0.606 |
| 4.407 | 4.300 | 5.397 | 3.459 | 3.924 | 0.679 | 0.606 |
| 2.163 | 2.560 | 1.831 | 2.643 | 2.174 | 0.411 | 0.606 |
| 3.591 | 2.264 | 2.752 | 2.345 | 3.581 | 0.496 | 0.606 |
| 4.422 | 3.643 | 4.292 | 3.815 | 3.657 | 0.449 | 0.606 |
| 5.332 | 6.264 | 4.298 | 6.613 | 6.378 | 0.593 | 0.606 |
| 3.804 | 2.691 | 3.882 | 2.847 | 2.800 | 0.557 | 0.606 |
| 3.327 | 2.552 | 2.051 | 2.300 | 2.525 | 0.634 | 0.606 |
| 2.821 | 2.521 | 2.963 | 3.234 | 3.304 | 0.562 | 0.606 |
| 1.928 | 3.252 | 1.797 | 4.209 | 4.144 | 0.586 | 0.606 |
| 2.723 | 4.229 | 4.663 | 3.756 | 3.407 | 0.742 | 0.606 |

|       |       |       |       |       |       |       |
|-------|-------|-------|-------|-------|-------|-------|
| 1.867 | 3.370 | 1.777 | 1.789 | 2.650 | 0.563 | 0.606 |
| 5.380 | 2.977 | 5.778 | 3.178 | 3.346 | 0.711 | 0.606 |
| 3.558 | 4.075 | 4.258 | 3.833 | 4.686 | 0.601 | 0.606 |
| 3.597 | 3.677 | 3.294 | 3.288 | 2.725 | 0.516 | 0.606 |
| 4.885 | 5.017 | 5.118 | 4.624 | 4.373 | 0.401 | 0.606 |
| 2.282 | 1.720 | 1.739 | 2.083 | 2.053 | 0.589 | 0.606 |
| 1.916 | 2.375 | 1.015 | 2.644 | 3.584 | 0.659 | 0.606 |
| 3.155 | 1.669 | 4.132 | 3.174 | 2.882 | 0.601 | 0.606 |
| 2.617 | 3.090 | 1.910 | 2.235 | 2.056 | 0.469 | 0.606 |
| 4.692 | 4.241 | 4.736 | 3.361 | 3.843 | 0.488 | 0.606 |
| 2.197 | 2.551 | 3.159 | 2.377 | 2.926 | 0.474 | 0.606 |
| 4.244 | 6.201 | 3.577 | 6.571 | 6.059 | 0.777 | 0.606 |
| 3.761 | 3.621 | 3.393 | 4.125 | 2.812 | 0.478 | 0.606 |
| 2.490 | 4.028 | 3.528 | 4.193 | 4.013 | 0.447 | 0.606 |
| 1.236 | 1.830 | 2.341 | 1.781 | 1.006 | 0.556 | 0.606 |
| 2.639 | 2.338 | 2.316 | 2.150 | 2.392 | 0.422 | 0.606 |
| 4.653 | 5.195 | 2.499 | 6.030 | 5.907 | 0.973 | 0.606 |
| 2.539 | 2.227 | 2.840 | 1.286 | 3.432 | 0.684 | 0.606 |
| 3.339 | 2.678 | 3.038 | 1.568 | 3.514 | 0.602 | 0.606 |
| 3.758 | 3.733 | 4.502 | 3.362 | 4.228 | 0.472 | 0.606 |
| 1.639 | 2.625 | 2.106 | 2.970 | 2.950 | 0.639 | 0.606 |
| 5.629 | 4.652 | 5.607 | 5.296 | 4.817 | 0.411 | 0.606 |
| 4.292 | 3.725 | 4.415 | 3.101 | 3.352 | 0.434 | 0.606 |
| 1.879 | 2.771 | 2.498 | 0.431 | 3.102 | 0.688 | 0.606 |
| 2.809 | 2.374 | 2.425 | 3.025 | 2.809 | 0.442 | 0.606 |
| 3.472 | 2.614 | 3.969 | 2.572 | 2.349 | 0.425 | 0.606 |
| 6.254 | 6.651 | 6.101 | 7.130 | 7.050 | 0.325 | 0.606 |
| 7.133 | 9.496 | 6.650 | 9.763 | 9.663 | 0.778 | 0.606 |
| 4.980 | 5.799 | 6.430 | 5.794 | 5.497 | 0.591 | 0.606 |
| 6.083 | 6.792 | 6.421 | 6.718 | 7.001 | 0.320 | 0.606 |
| 3.939 | 3.539 | 5.084 | 3.187 | 3.053 | 0.512 | 0.606 |
| 3.734 | 4.642 | 3.232 | 4.818 | 5.120 | 0.471 | 0.606 |
| 8.343 | 8.389 | 8.515 | 8.046 | 8.664 | 0.339 | 0.606 |
| 2.260 | 4.887 | 2.520 | 5.451 | 5.012 | 0.961 | 0.606 |
| 4.624 | 3.869 | 4.612 | 3.739 | 4.624 | 0.518 | 0.606 |
| 8.736 | 9.184 | 6.248 | 9.390 | 9.397 | 0.677 | 0.606 |
| 5.847 | 6.376 | 6.074 | 6.695 | 6.464 | 0.340 | 0.606 |
| 3.780 | 4.248 | 3.742 | 3.543 | 3.930 | 0.462 | 0.606 |
| 3.684 | 4.302 | 4.020 | 4.457 | 4.480 | 0.342 | 0.606 |
| 5.964 | 5.795 | 6.205 | 5.067 | 4.759 | 0.395 | 0.606 |
| 6.308 | 7.885 | 7.103 | 7.757 | 7.546 | 0.478 | 0.606 |
| 5.457 | 4.467 | 4.907 | 4.918 | 4.840 | 0.536 | 0.606 |
| 1.874 | 2.209 | 2.001 | 2.300 | 2.220 | 0.790 | 0.606 |
| 3.805 | 2.806 | 2.659 | 2.972 | 2.606 | 0.362 | 0.606 |
| 4.055 | 4.552 | 5.061 | 3.260 | 3.667 | 0.723 | 0.606 |
| 5.862 | 6.379 | 5.686 | 6.956 | 6.882 | 0.435 | 0.606 |
| 3.282 | 4.495 | 3.535 | 4.926 | 4.403 | 0.456 | 0.606 |
| 4.370 | 3.327 | 3.831 | 3.613 | 3.911 | 0.497 | 0.606 |
| 4.294 | 4.954 | 2.549 | 5.729 | 5.425 | 0.735 | 0.606 |
| 2.342 | 2.253 | 2.655 | 1.879 | 1.712 | 0.498 | 0.606 |

|       |       |        |       |       |       |       |
|-------|-------|--------|-------|-------|-------|-------|
| 5.509 | 5.204 | 6.182  | 4.788 | 4.451 | 0.427 | 0.606 |
| 3.099 | 2.942 | 2.616  | 3.611 | 4.014 | 0.482 | 0.606 |
| 1.555 | 4.913 | 5.393  | 1.992 | 2.918 | 0.912 | 0.606 |
| 2.297 | 2.980 | 2.224  | 2.301 | 2.714 | 0.630 | 0.606 |
| 2.919 | 2.295 | 3.382  | 2.195 | 2.479 | 0.432 | 0.606 |
| 4.449 | 5.109 | 3.887  | 5.183 | 4.866 | 0.510 | 0.606 |
| 3.889 | 4.184 | 3.741  | 3.081 | 3.685 | 0.558 | 0.606 |
| 4.801 | 4.923 | 4.316  | 4.759 | 5.058 | 0.443 | 0.606 |
| 6.909 | 7.289 | 5.192  | 7.382 | 7.537 | 0.512 | 0.606 |
| 7.236 | 7.549 | 7.741  | 7.325 | 7.100 | 0.351 | 0.606 |
| 7.940 | 6.741 | 8.937  | 6.888 | 6.328 | 0.588 | 0.606 |
| 3.205 | 2.183 | 3.084  | 1.814 | 1.906 | 0.528 | 0.606 |
| 8.925 | 7.269 | 9.448  | 5.735 | 6.451 | 0.837 | 0.606 |
| 8.163 | 8.682 | 8.161  | 8.726 | 8.835 | 0.316 | 0.606 |
| 4.224 | 4.453 | 3.075  | 4.508 | 4.742 | 0.518 | 0.606 |
| 8.922 | 7.807 | 9.940  | 5.923 | 6.350 | 0.854 | 0.606 |
| 9.004 | 7.808 | 10.052 | 5.963 | 6.330 | 0.862 | 0.606 |
| 3.843 | 4.166 | 4.499  | 3.428 | 4.318 | 0.451 | 0.606 |
| 3.232 | 2.547 | 2.157  | 2.903 | 3.591 | 0.472 | 0.606 |
| 5.043 | 4.404 | 4.937  | 4.624 | 4.482 | 0.405 | 0.606 |
| 4.585 | 3.642 | 5.535  | 4.136 | 3.809 | 0.458 | 0.606 |
| 3.014 | 3.306 | 3.038  | 3.387 | 3.542 | 0.403 | 0.606 |
| 2.005 | 3.345 | 2.058  | 3.475 | 3.251 | 0.447 | 0.606 |
| 3.740 | 4.958 | 3.275  | 5.439 | 5.089 | 0.519 | 0.606 |
| 4.362 | 4.521 | 4.575  | 5.361 | 5.300 | 0.493 | 0.606 |
| 6.691 | 5.707 | 7.366  | 4.892 | 5.652 | 0.541 | 0.606 |
| 2.522 | 5.430 | 6.854  | 5.554 | 6.562 | 0.908 | 0.606 |
| 7.091 | 7.800 | 6.744  | 7.942 | 8.049 | 0.402 | 0.606 |
| 4.515 | 4.079 | 4.023  | 3.427 | 4.953 | 0.601 | 0.606 |
| 4.824 | 4.680 | 5.481  | 5.372 | 5.197 | 0.338 | 0.606 |
| 5.364 | 3.988 | 4.037  | 4.242 | 4.298 | 0.443 | 0.606 |
| 7.109 | 7.437 | 6.402  | 7.962 | 8.009 | 0.403 | 0.606 |
| 3.742 | 5.070 | 2.756  | 5.135 | 5.389 | 0.599 | 0.606 |
| 4.206 | 6.822 | 3.196  | 6.898 | 6.793 | 0.965 | 0.606 |
| 4.696 | 4.133 | 2.730  | 4.492 | 4.502 | 0.504 | 0.606 |
| 2.396 | 2.807 | 2.631  | 2.504 | 2.231 | 0.433 | 0.606 |
| 2.342 | 1.974 | 2.278  | 2.806 | 2.683 | 1.125 | 0.606 |
| 2.806 | 3.225 | 2.763  | 2.045 | 3.141 | 0.580 | 0.606 |
| 3.607 | 3.838 | 3.418  | 3.302 | 3.506 | 0.380 | 0.606 |
| 5.525 | 5.611 | 2.410  | 6.206 | 5.722 | 0.790 | 0.606 |
| 2.660 | 4.929 | 4.250  | 4.993 | 5.968 | 0.710 | 0.606 |
| 2.408 | 4.717 | 4.080  | 4.770 | 5.728 | 0.722 | 0.606 |
| 3.869 | 3.927 | 4.514  | 2.970 | 3.427 | 0.482 | 0.606 |
| 3.416 | 4.033 | 3.248  | 3.898 | 4.474 | 0.445 | 0.606 |
| 6.929 | 7.172 | 7.212  | 7.891 | 7.606 | 0.344 | 0.606 |
| 4.091 | 4.336 | 4.508  | 4.771 | 4.187 | 0.420 | 0.606 |
| 4.116 | 3.126 | 2.552  | 3.182 | 3.602 | 0.435 | 0.606 |
| 5.255 | 5.046 | 4.704  | 4.305 | 4.870 | 0.479 | 0.606 |
| 6.266 | 6.196 | 6.855  | 5.901 | 7.079 | 0.462 | 0.606 |
| 4.112 | 4.023 | 3.747  | 4.932 | 4.372 | 0.401 | 0.606 |

|       |       |        |        |        |       |       |
|-------|-------|--------|--------|--------|-------|-------|
| 6.644 | 6.368 | 5.741  | 6.793  | 7.218  | 0.370 | 0.606 |
| 6.239 | 6.093 | 6.229  | 6.369  | 6.775  | 0.312 | 0.606 |
| 5.513 | 5.966 | 5.424  | 5.901  | 6.268  | 0.432 | 0.606 |
| 6.103 | 6.939 | 6.111  | 6.827  | 6.994  | 0.395 | 0.606 |
| 4.602 | 4.691 | 4.687  | 4.880  | 5.112  | 0.377 | 0.606 |
| 6.315 | 6.496 | 6.141  | 6.567  | 6.713  | 0.320 | 0.606 |
| 5.765 | 5.986 | 5.953  | 6.524  | 5.977  | 0.341 | 0.606 |
| 6.063 | 6.929 | 6.594  | 7.574  | 7.472  | 0.414 | 0.606 |
| 3.604 | 4.162 | 3.809  | 4.467  | 4.151  | 0.380 | 0.606 |
| 5.202 | 5.719 | 4.731  | 5.623  | 5.422  | 0.340 | 0.606 |
| 9.483 | 9.974 | 9.096  | 10.019 | 10.331 | 0.332 | 0.606 |
| 6.167 | 7.001 | 6.732  | 7.445  | 7.382  | 0.353 | 0.606 |
| 4.333 | 4.051 | 5.349  | 4.243  | 4.071  | 0.442 | 0.606 |
| 2.763 | 3.262 | 2.321  | 3.192  | 3.331  | 0.391 | 0.606 |
| 4.261 | 4.437 | 4.495  | 4.933  | 4.258  | 0.506 | 0.606 |
| 5.504 | 5.911 | 5.623  | 5.764  | 6.301  | 0.358 | 0.606 |
| 5.162 | 5.243 | 4.161  | 5.530  | 5.498  | 0.400 | 0.606 |
| 6.296 | 6.477 | 6.964  | 5.842  | 6.119  | 0.406 | 0.606 |
| 3.235 | 2.447 | 4.722  | 2.332  | 2.429  | 0.705 | 0.606 |
| 2.254 | 2.626 | 3.158  | 0.809  | 2.841  | 0.644 | 0.606 |
| 3.163 | 3.270 | 4.035  | 2.248  | 2.600  | 0.608 | 0.606 |
| 4.811 | 5.038 | 5.868  | 2.814  | 4.270  | 0.728 | 0.606 |
| 5.660 | 5.787 | 6.238  | 6.134  | 6.229  | 0.311 | 0.606 |
| 6.147 | 6.234 | 5.868  | 6.644  | 6.460  | 0.368 | 0.606 |
| 3.248 | 2.676 | 3.049  | 2.383  | 2.430  | 0.407 | 0.606 |
| 4.036 | 3.538 | 3.892  | 2.982  | 3.032  | 0.448 | 0.606 |
| 7.446 | 6.421 | 7.157  | 6.811  | 6.928  | 0.408 | 0.606 |
| 2.054 | 3.403 | 2.205  | 2.868  | 2.849  | 0.542 | 0.606 |
| 7.651 | 7.269 | 6.928  | 6.378  | 7.259  | 0.522 | 0.606 |
| 8.952 | 8.731 | 8.862  | 7.266  | 8.012  | 0.485 | 0.606 |
| 1.972 | 1.705 | 2.355  | 1.607  | 1.794  | 0.444 | 0.606 |
| 4.215 | 3.173 | 2.972  | 4.464  | 4.202  | 0.567 | 0.606 |
| 3.108 | 1.902 | 2.075  | 1.838  | 2.044  | 0.408 | 0.606 |
| 2.360 | 2.428 | 4.046  | 2.525  | 2.287  | 0.638 | 0.606 |
| 3.209 | 2.540 | 3.007  | 3.046  | 3.149  | 0.436 | 0.606 |
| 2.836 | 6.062 | 3.662  | 3.312  | 3.650  | 1.103 | 0.606 |
| 6.327 | 6.572 | 7.155  | 6.386  | 5.798  | 0.446 | 0.606 |
| 4.132 | 3.320 | 4.928  | 4.885  | 4.594  | 1.024 | 0.606 |
| 7.659 | 4.484 | 7.520  | 7.101  | 6.397  | 0.878 | 0.606 |
| 6.323 | 5.607 | 6.974  | 7.112  | 6.155  | 0.801 | 0.606 |
| 1.654 | 3.074 | 3.075  | 2.825  | 2.035  | 0.762 | 0.606 |
| 2.998 | 4.632 | 2.339  | 2.821  | 3.533  | 0.632 | 0.606 |
| 6.803 | 8.591 | 8.050  | 7.543  | 7.001  | 0.573 | 0.606 |
| 9.126 | 9.593 | 10.124 | 9.263  | 8.385  | 0.503 | 0.606 |
| 6.610 | 6.733 | 6.964  | 6.418  | 5.655  | 0.440 | 0.606 |
| 3.460 | 4.253 | 3.605  | 4.902  | 4.552  | 0.392 | 0.606 |
| 4.510 | 4.658 | 4.581  | 4.520  | 4.796  | 0.345 | 0.606 |
| 4.253 | 4.089 | 3.763  | 4.380  | 4.173  | 0.446 | 0.606 |
| 4.548 | 4.993 | 4.601  | 4.580  | 5.357  | 0.379 | 0.606 |
| 2.971 | 3.626 | 2.548  | 3.668  | 3.920  | 0.667 | 0.606 |



|        |        |       |       |       |       |       |
|--------|--------|-------|-------|-------|-------|-------|
| 3.446  | 2.798  | 3.910 | 2.178 | 2.186 | 0.465 | 0.606 |
| 4.198  | 4.514  | 4.824 | 3.098 | 3.634 | 0.541 | 0.606 |
| 4.431  | 4.045  | 4.801 | 3.888 | 3.828 | 0.446 | 0.606 |
| 9.326  | 7.691  | 9.490 | 7.394 | 7.367 | 0.571 | 0.606 |
| 4.117  | 4.879  | 4.932 | 3.863 | 4.516 | 0.491 | 0.606 |
| 6.324  | 7.002  | 6.368 | 7.052 | 6.952 | 0.322 | 0.606 |
| 7.345  | 7.732  | 7.275 | 7.645 | 7.621 | 0.302 | 0.606 |
| 6.950  | 6.742  | 7.116 | 7.005 | 7.005 | 0.349 | 0.606 |
| 6.100  | 6.074  | 6.339 | 6.221 | 6.631 | 0.440 | 0.606 |
| 5.534  | 5.680  | 5.255 | 5.701 | 5.785 | 0.350 | 0.606 |
| 3.498  | 3.378  | 3.876 | 2.575 | 2.971 | 0.493 | 0.606 |
| 4.445  | 4.838  | 5.106 | 5.044 | 4.552 | 0.349 | 0.606 |
| 6.543  | 6.401  | 6.120 | 6.804 | 6.620 | 0.318 | 0.606 |
| 3.978  | 4.023  | 3.457 | 4.076 | 4.157 | 0.389 | 0.606 |
| 3.664  | 3.036  | 4.553 | 3.014 | 4.146 | 0.570 | 0.606 |
| 6.674  | 6.517  | 6.827 | 5.999 | 6.066 | 0.431 | 0.606 |
| 6.998  | 6.069  | 7.629 | 6.192 | 6.332 | 0.420 | 0.606 |
| 7.883  | 7.370  | 7.741 | 7.574 | 7.357 | 0.353 | 0.606 |
| 10.317 | 10.499 | 9.900 | 9.455 | 9.456 | 0.452 | 0.606 |
| 4.243  | 3.630  | 3.786 | 5.057 | 4.518 | 1.036 | 0.606 |
| 7.561  | 7.397  | 6.893 | 6.976 | 4.581 | 0.883 | 0.606 |
| 7.842  | 7.820  | 7.270 | 7.795 | 7.857 | 0.562 | 0.606 |
| 6.048  | 5.387  | 5.611 | 6.072 | 5.800 | 1.058 | 0.606 |
| 6.890  | 6.628  | 6.607 | 6.546 | 7.214 | 0.711 | 0.606 |
| 9.690  | 9.052  | 9.212 | 9.474 | 9.463 | 0.571 | 0.606 |
| 8.010  | 8.507  | 6.618 | 7.150 | 7.404 | 0.640 | 0.606 |
| 4.035  | 4.076  | 2.610 | 3.965 | 3.481 | 0.611 | 0.606 |
| 8.288  | 8.910  | 8.218 | 7.263 | 7.996 | 0.656 | 0.606 |
| 6.461  | 6.319  | 6.093 | 6.047 | 6.394 | 0.863 | 0.606 |
| 7.860  | 7.738  | 7.440 | 7.524 | 7.327 | 0.566 | 0.606 |
| 9.777  | 9.440  | 9.265 | 9.320 | 9.355 | 0.498 | 0.606 |
| 3.152  | 3.991  | 3.715 | 2.650 | 4.780 | 0.691 | 0.606 |
| 5.089  | 4.701  | 4.960 | 5.082 | 5.262 | 0.555 | 0.606 |
| 6.084  | 5.413  | 6.861 | 4.658 | 5.005 | 0.485 | 0.606 |
| 4.058  | 4.715  | 2.403 | 5.530 | 5.267 | 0.738 | 0.606 |
| 6.054  | 6.197  | 5.574 | 6.645 | 6.935 | 0.415 | 0.606 |
| 3.190  | 3.157  | 2.985 | 2.400 | 2.871 | 0.397 | 0.606 |
| 4.163  | 2.879  | 2.571 | 3.308 | 4.004 | 0.571 | 0.606 |
| 3.754  | 5.567  | 4.050 | 7.020 | 5.630 | 0.922 | 0.606 |
| 4.666  | 3.711  | 5.634 | 4.082 | 4.222 | 0.453 | 0.606 |
| 7.485  | 6.234  | 7.580 | 5.308 | 5.697 | 0.547 | 0.606 |
| 5.618  | 5.390  | 5.124 | 4.571 | 5.175 | 0.463 | 0.606 |
| 4.917  | 4.111  | 4.744 | 3.591 | 3.395 | 0.525 | 0.606 |
| 5.441  | 5.937  | 5.804 | 3.551 | 4.635 | 0.653 | 0.606 |
| 3.035  | 2.550  | 3.460 | 2.280 | 2.662 | 0.524 | 0.606 |
| 5.650  | 6.036  | 6.618 | 6.579 | 6.366 | 0.527 | 0.606 |
| 6.110  | 5.742  | 3.662 | 5.449 | 6.322 | 0.499 | 0.606 |
| 4.065  | 4.294  | 4.030 | 3.312 | 3.752 | 0.473 | 0.606 |
| 2.508  | 2.325  | 2.792 | 2.606 | 3.426 | 0.419 | 0.606 |
| 1.516  | 1.985  | 2.899 | 2.005 | 1.930 | 0.499 | 0.606 |

|       |       |       |       |       |       |       |
|-------|-------|-------|-------|-------|-------|-------|
| 2.178 | 2.970 | 2.967 | 2.847 | 2.993 | 0.501 | 0.606 |
| 8.275 | 8.491 | 7.366 | 8.943 | 8.827 | 0.402 | 0.606 |
| 4.401 | 3.426 | 5.314 | 4.123 | 3.863 | 0.463 | 0.606 |
| 2.439 | 3.773 | 3.020 | 2.039 | 3.119 | 0.423 | 0.606 |
| 7.180 | 7.586 | 5.311 | 7.892 | 7.742 | 0.577 | 0.606 |
| 5.299 | 6.111 | 5.434 | 5.450 | 5.559 | 0.697 | 0.606 |
| 5.534 | 4.642 | 5.835 | 4.540 | 4.637 | 0.408 | 0.606 |
| 3.491 | 3.668 | 3.855 | 2.778 | 3.256 | 0.433 | 0.606 |
| 2.875 | 2.808 | 3.627 | 2.069 | 2.389 | 0.584 | 0.606 |
| 3.431 | 2.617 | 2.382 | 2.575 | 2.651 | 0.459 | 0.606 |
| 5.753 | 6.246 | 5.509 | 5.753 | 6.211 | 0.682 | 0.606 |
| 5.612 | 5.639 | 6.530 | 5.950 | 5.698 | 0.362 | 0.606 |
| 4.933 | 4.922 | 5.501 | 4.087 | 3.511 | 0.518 | 0.606 |
| 3.622 | 2.897 | 2.181 | 2.023 | 2.883 | 0.560 | 0.606 |
| 3.784 | 3.652 | 2.528 | 4.864 | 3.726 | 0.588 | 0.606 |
| 4.893 | 4.065 | 4.669 | 3.387 | 3.631 | 0.479 | 0.606 |
| 4.476 | 5.238 | 3.576 | 5.719 | 5.676 | 0.483 | 0.606 |
| 3.885 | 3.012 | 2.719 | 2.579 | 2.476 | 0.987 | 0.606 |
| 4.556 | 6.221 | 4.409 | 6.634 | 6.541 | 0.609 | 0.606 |
| 5.576 | 5.012 | 5.245 | 4.571 | 5.747 | 0.377 | 0.606 |
| 7.443 | 6.392 | 8.475 | 5.181 | 5.409 | 0.715 | 0.606 |
| 6.957 | 6.362 | 7.838 | 5.251 | 5.447 | 0.547 | 0.606 |
| 4.911 | 5.023 | 5.955 | 4.070 | 4.417 | 0.573 | 0.606 |
| 2.148 | 3.868 | 2.911 | 1.980 | 2.360 | 0.866 | 0.606 |
| 8.774 | 9.238 | 7.969 | 9.536 | 9.457 | 0.442 | 0.606 |
| 3.141 | 4.687 | 3.662 | 4.547 | 4.470 | 0.512 | 0.606 |
| 4.474 | 3.294 | 4.189 | 2.879 | 3.245 | 0.571 | 0.606 |
| 7.291 | 7.508 | 6.967 | 7.670 | 7.677 | 0.303 | 0.606 |
| 7.755 | 7.080 | 8.219 | 6.039 | 6.212 | 0.506 | 0.606 |
| 5.057 | 5.326 | 5.489 | 3.979 | 5.220 | 0.585 | 0.606 |
| 5.314 | 4.078 | 5.425 | 4.147 | 4.219 | 0.505 | 0.606 |
| 3.051 | 3.634 | 2.566 | 5.014 | 4.442 | 0.576 | 0.606 |
| 2.341 | 2.519 | 3.202 | 2.108 | 2.491 | 0.439 | 0.606 |
| 3.087 | 4.021 | 2.795 | 4.420 | 4.407 | 0.477 | 0.606 |
| 7.250 | 6.422 | 7.540 | 5.014 | 5.116 | 0.612 | 0.606 |
| 5.091 | 5.891 | 4.374 | 6.341 | 6.208 | 0.474 | 0.606 |
| 6.807 | 6.748 | 6.818 | 7.087 | 7.168 | 0.323 | 0.606 |
| 6.293 | 7.870 | 3.908 | 8.553 | 8.241 | 0.963 | 0.606 |
| 3.565 | 4.789 | 3.412 | 4.690 | 4.660 | 0.442 | 0.606 |
| 4.779 | 5.715 | 5.276 | 5.547 | 5.696 | 0.422 | 0.606 |
| 6.672 | 5.662 | 6.768 | 5.571 | 5.525 | 0.541 | 0.606 |
| 1.811 | 3.960 | 1.658 | 2.929 | 2.615 | 0.703 | 0.606 |
| 6.286 | 6.675 | 5.936 | 6.916 | 6.785 | 0.351 | 0.606 |
| 4.504 | 3.695 | 3.452 | 4.234 | 4.430 | 0.485 | 0.606 |
| 3.886 | 3.862 | 3.652 | 3.578 | 3.237 | 0.425 | 0.606 |
| 3.767 | 3.870 | 4.119 | 3.737 | 3.499 | 0.400 | 0.606 |
| 6.593 | 5.859 | 6.725 | 5.025 | 4.685 | 0.499 | 0.606 |
| 4.378 | 3.421 | 4.364 | 4.747 | 2.891 | 0.559 | 0.606 |
| 7.483 | 6.721 | 7.511 | 6.637 | 6.248 | 0.385 | 0.606 |
| 5.003 | 5.188 | 5.047 | 5.346 | 5.629 | 0.340 | 0.606 |

|       |       |       |        |       |       |       |
|-------|-------|-------|--------|-------|-------|-------|
| 3.993 | 2.765 | 2.720 | 3.697  | 3.517 | 0.573 | 0.606 |
| 5.341 | 5.169 | 5.281 | 4.303  | 4.856 | 0.415 | 0.606 |
| 4.705 | 4.715 | 5.317 | 3.818  | 3.942 | 0.404 | 0.606 |
| 4.588 | 5.370 | 4.030 | 5.675  | 5.855 | 0.462 | 0.606 |
| 5.816 | 5.984 | 7.214 | 5.273  | 5.858 | 0.609 | 0.606 |
| 6.751 | 7.936 | 7.662 | 6.841  | 7.824 | 0.711 | 0.606 |
| 7.540 | 8.156 | 5.691 | 8.578  | 8.684 | 0.681 | 0.606 |
| 7.830 | 8.175 | 6.684 | 8.663  | 8.430 | 0.508 | 0.606 |
| 8.705 | 8.100 | 5.983 | 8.360  | 8.543 | 0.613 | 0.606 |
| 3.834 | 3.923 | 4.958 | 3.597  | 3.572 | 0.417 | 0.606 |
| 8.415 | 8.890 | 5.542 | 9.381  | 9.417 | 0.883 | 0.606 |
| 6.581 | 7.012 | 7.648 | 7.451  | 7.269 | 0.351 | 0.606 |
| 8.201 | 8.069 | 7.398 | 8.415  | 8.444 | 0.354 | 0.606 |
| 4.016 | 5.406 | 4.788 | 2.094  | 2.894 | 0.970 | 0.606 |
| 6.096 | 5.582 | 6.974 | 5.092  | 5.282 | 0.427 | 0.606 |
| 3.588 | 4.848 | 3.247 | 4.783  | 3.992 | 0.438 | 0.606 |
| 7.412 | 8.021 | 6.342 | 7.852  | 7.970 | 0.466 | 0.606 |
| 7.005 | 6.028 | 6.442 | 6.072  | 5.955 | 0.444 | 0.606 |
| 4.007 | 5.364 | 3.966 | 5.792  | 5.427 | 0.509 | 0.606 |
| 2.952 | 3.146 | 2.900 | 1.779  | 2.460 | 0.449 | 0.606 |
| 3.417 | 3.011 | 2.917 | 2.248  | 3.261 | 0.421 | 0.606 |
| 2.873 | 2.532 | 2.707 | 2.331  | 1.583 | 0.499 | 0.606 |
| 7.611 | 8.206 | 6.325 | 8.593  | 8.471 | 0.591 | 0.606 |
| 5.918 | 5.190 | 5.820 | 5.065  | 5.241 | 0.479 | 0.606 |
| 8.001 | 7.149 | 8.061 | 7.227  | 7.407 | 0.339 | 0.606 |
| 7.721 | 6.899 | 7.703 | 7.102  | 7.157 | 0.332 | 0.606 |
| 5.961 | 5.338 | 5.963 | 5.214  | 5.282 | 0.441 | 0.606 |
| 6.218 | 5.899 | 6.995 | 6.586  | 6.480 | 0.357 | 0.606 |
| 3.841 | 2.091 | 4.787 | 1.704  | 2.364 | 0.737 | 0.606 |
| 7.905 | 6.437 | 8.076 | 7.635  | 7.221 | 0.544 | 0.606 |
| 6.836 | 5.161 | 6.800 | 5.588  | 6.263 | 0.548 | 0.606 |
| 8.620 | 7.630 | 8.449 | 7.888  | 7.836 | 0.363 | 0.606 |
| 5.181 | 4.665 | 6.019 | 5.754  | 5.784 | 0.584 | 0.606 |
| 4.519 | 3.244 | 4.551 | 3.382  | 3.637 | 0.478 | 0.606 |
| 3.069 | 3.196 | 2.857 | 4.588  | 3.808 | 0.419 | 0.606 |
| 8.797 | 8.744 | 9.169 | 8.824  | 8.754 | 0.315 | 0.606 |
| 6.725 | 7.268 | 7.140 | 7.493  | 7.355 | 0.589 | 0.606 |
| 5.197 | 5.278 | 6.287 | 4.398  | 4.741 | 0.425 | 0.606 |
| 5.668 | 6.267 | 5.326 | 6.188  | 6.229 | 0.307 | 0.606 |
| 6.856 | 7.572 | 5.987 | 7.437  | 7.400 | 0.503 | 0.606 |
| 5.902 | 7.163 | 3.612 | 7.469  | 7.400 | 0.763 | 0.606 |
| 3.880 | 3.418 | 4.664 | 3.629  | 2.983 | 0.633 | 0.606 |
| 4.104 | 5.498 | 4.567 | 3.471  | 4.396 | 0.657 | 0.606 |
| 4.217 | 4.400 | 4.561 | 3.509  | 4.169 | 0.564 | 0.606 |
| 3.694 | 3.140 | 4.361 | 2.811  | 3.011 | 0.504 | 0.606 |
| 6.426 | 7.153 | 6.675 | 7.446  | 7.277 | 0.373 | 0.606 |
| 9.135 | 9.650 | 8.756 | 10.095 | 9.881 | 0.359 | 0.606 |
| 5.264 | 5.514 | 5.629 | 3.559  | 4.796 | 0.714 | 0.606 |
| 6.452 | 4.815 | 6.528 | 4.070  | 4.750 | 0.589 | 0.606 |
| 4.444 | 2.281 | 3.928 | 1.943  | 2.017 | 0.759 | 0.606 |

|        |        |        |        |        |       |       |
|--------|--------|--------|--------|--------|-------|-------|
| 5.945  | 6.514  | 5.247  | 6.414  | 6.445  | 0.374 | 0.606 |
| 2.044  | 3.223  | 3.504  | 2.559  | 2.341  | 0.943 | 0.606 |
| 6.362  | 6.399  | 6.213  | 7.149  | 6.560  | 0.440 | 0.606 |
| 7.862  | 7.855  | 7.673  | 7.911  | 7.997  | 0.382 | 0.606 |
| 4.556  | 5.306  | 1.556  | 5.518  | 5.592  | 0.785 | 0.606 |
| 2.646  | 2.372  | 2.724  | 2.212  | 2.868  | 0.629 | 0.606 |
| 5.002  | 4.870  | 4.848  | 5.139  | 4.838  | 1.265 | 0.606 |
| 7.978  | 8.547  | 5.074  | 8.614  | 8.505  | 0.771 | 0.606 |
| 8.646  | 8.293  | 8.462  | 7.847  | 7.713  | 0.441 | 0.606 |
| 8.279  | 7.129  | 9.077  | 5.974  | 6.237  | 0.633 | 0.606 |
| 7.802  | 8.133  | 7.151  | 8.585  | 8.305  | 0.365 | 0.606 |
| 7.266  | 7.699  | 7.011  | 7.773  | 8.014  | 0.331 | 0.606 |
| 5.749  | 7.425  | 6.452  | 7.452  | 7.447  | 0.452 | 0.606 |
| 4.655  | 4.562  | 4.118  | 4.408  | 4.611  | 0.370 | 0.606 |
| 3.834  | 2.774  | 1.329  | 2.784  | 3.104  | 0.590 | 0.606 |
| 5.164  | 5.279  | 5.600  | 5.544  | 5.740  | 0.453 | 0.606 |
| 6.083  | 5.615  | 7.106  | 4.854  | 5.118  | 0.481 | 0.606 |
| 6.689  | 6.018  | 7.128  | 6.261  | 6.308  | 0.421 | 0.606 |
| 7.673  | 7.808  | 6.963  | 8.201  | 8.262  | 0.412 | 0.606 |
| 8.128  | 8.254  | 5.903  | 8.280  | 8.426  | 0.598 | 0.606 |
| 6.985  | 6.442  | 6.607  | 6.024  | 6.059  | 0.337 | 0.606 |
| 4.296  | 5.566  | 2.451  | 6.274  | 6.115  | 0.816 | 0.606 |
| 4.111  | 2.031  | 1.884  | 2.369  | 2.780  | 0.565 | 0.606 |
| 4.675  | 4.679  | 4.251  | 4.981  | 4.653  | 0.324 | 0.606 |
| 1.782  | 3.959  | 2.144  | 4.023  | 3.813  | 0.707 | 0.606 |
| 7.012  | 7.709  | 7.147  | 7.789  | 7.705  | 0.307 | 0.606 |
| 3.630  | 3.637  | 4.324  | 3.899  | 4.236  | 0.399 | 0.606 |
| 3.254  | 4.099  | 3.543  | 4.522  | 4.575  | 0.408 | 0.606 |
| 5.249  | 5.766  | 5.276  | 5.857  | 5.675  | 0.308 | 0.606 |
| 4.693  | 5.416  | 4.423  | 5.313  | 6.045  | 0.416 | 0.606 |
| 9.933  | 9.254  | 10.039 | 8.362  | 7.502  | 0.700 | 0.606 |
| 2.572  | 2.531  | 4.324  | 3.762  | 3.554  | 0.641 | 0.606 |
| 2.996  | 2.829  | 2.169  | 2.996  | 3.312  | 0.450 | 0.606 |
| 7.167  | 8.577  | 8.070  | 8.864  | 8.788  | 0.526 | 0.606 |
| 5.604  | 6.516  | 3.984  | 7.029  | 6.939  | 0.712 | 0.606 |
| 5.004  | 5.105  | 3.913  | 5.100  | 4.587  | 0.426 | 0.606 |
| 7.942  | 7.758  | 6.178  | 8.083  | 8.136  | 0.503 | 0.606 |
| 5.516  | 5.051  | 5.989  | 4.735  | 4.919  | 0.340 | 0.606 |
| 5.240  | 5.084  | 5.966  | 4.732  | 4.974  | 0.363 | 0.606 |
| 6.745  | 7.850  | 5.272  | 8.263  | 7.889  | 0.658 | 0.606 |
| 10.297 | 7.951  | 3.947  | 8.348  | 9.021  | 1.405 | 0.606 |
| 11.438 | 10.932 | 5.266  | 10.943 | 11.164 | 1.404 | 0.606 |
| 11.075 | 9.851  | 6.639  | 10.290 | 10.663 | 1.120 | 0.606 |
| 7.375  | 8.108  | 6.513  | 8.524  | 8.270  | 0.526 | 0.606 |
| 1.886  | 2.025  | 1.875  | 3.458  | 2.426  | 0.468 | 0.606 |
| 3.109  | 3.985  | 2.341  | 4.697  | 4.415  | 0.608 | 0.606 |
| 5.092  | 4.111  | 5.926  | 3.230  | 3.790  | 0.654 | 0.606 |
| 3.368  | 2.649  | 3.453  | 2.581  | 2.701  | 0.587 | 0.606 |
| 6.696  | 5.854  | 7.088  | 5.924  | 6.160  | 0.387 | 0.606 |
| 4.982  | 5.259  | 3.230  | 5.729  | 5.968  | 0.762 | 0.606 |

|       |       |       |       |       |       |       |
|-------|-------|-------|-------|-------|-------|-------|
| 5.423 | 7.377 | 3.468 | 7.715 | 7.381 | 0.841 | 0.606 |
| 5.447 | 5.254 | 6.223 | 4.531 | 5.129 | 0.365 | 0.606 |
| 5.253 | 4.477 | 5.441 | 4.267 | 4.906 | 0.413 | 0.606 |
| 6.173 | 5.549 | 6.230 | 5.839 | 5.613 | 0.375 | 0.606 |
| 5.594 | 7.462 | 3.502 | 7.834 | 8.006 | 0.942 | 0.606 |
| 6.374 | 7.715 | 5.542 | 7.998 | 7.637 | 0.685 | 0.606 |
| 4.639 | 5.711 | 3.142 | 6.010 | 5.575 | 0.613 | 0.606 |
| 2.366 | 3.766 | 2.866 | 3.354 | 3.030 | 0.437 | 0.606 |
| 5.003 | 5.805 | 4.706 | 5.772 | 5.158 | 0.366 | 0.606 |
| 1.516 | 2.563 | 1.127 | 2.028 | 2.782 | 0.484 | 0.606 |
| 3.116 | 5.566 | 2.075 | 6.442 | 5.947 | 0.948 | 0.606 |
| 1.932 | 5.736 | 1.741 | 6.784 | 6.499 | 1.213 | 0.606 |
| 6.221 | 6.919 | 6.175 | 6.961 | 7.051 | 0.354 | 0.606 |
| 3.578 | 3.679 | 3.940 | 2.844 | 3.170 | 0.383 | 0.606 |
| 4.189 | 4.020 | 4.208 | 3.025 | 3.731 | 0.396 | 0.606 |
| 4.270 | 4.017 | 3.994 | 3.735 | 3.830 | 0.435 | 0.606 |
| 3.274 | 2.596 | 3.320 | 3.203 | 2.950 | 0.371 | 0.606 |
| 6.679 | 6.609 | 7.503 | 5.996 | 6.601 | 0.372 | 0.606 |
| 2.469 | 1.870 | 2.813 | 1.085 | 1.421 | 0.508 | 0.606 |
| 2.505 | 2.378 | 2.599 | 1.406 | 2.066 | 0.577 | 0.606 |
| 4.355 | 5.819 | 5.950 | 5.918 | 4.885 | 0.777 | 0.606 |
| 2.456 | 3.841 | 3.701 | 3.092 | 3.115 | 0.394 | 0.606 |
| 6.570 | 7.279 | 7.182 | 6.829 | 6.400 | 0.447 | 0.606 |
| 3.187 | 3.684 | 3.229 | 3.614 | 3.697 | 0.392 | 0.606 |
| 4.440 | 4.328 | 4.451 | 3.884 | 4.334 | 0.394 | 0.606 |
| 4.052 | 3.763 | 2.339 | 4.284 | 3.475 | 0.470 | 0.606 |
| 3.863 | 6.077 | 3.767 | 6.170 | 5.879 | 0.684 | 0.606 |
| 3.016 | 4.172 | 4.047 | 2.512 | 2.492 | 0.561 | 0.606 |
| 8.950 | 9.483 | 8.179 | 9.711 | 9.613 | 0.374 | 0.606 |
| 4.276 | 4.670 | 3.891 | 4.622 | 3.978 | 0.430 | 0.606 |
| 2.946 | 2.850 | 3.079 | 3.234 | 3.591 | 0.362 | 0.606 |
| 5.663 | 5.427 | 5.148 | 5.064 | 5.483 | 0.463 | 0.606 |
| 4.845 | 4.807 | 3.110 | 5.024 | 5.030 | 0.471 | 0.606 |
| 4.795 | 3.776 | 4.044 | 4.083 | 3.829 | 0.388 | 0.606 |
| 3.268 | 3.830 | 2.243 | 4.340 | 4.066 | 0.495 | 0.606 |
| 5.960 | 7.131 | 6.007 | 7.028 | 6.999 | 0.386 | 0.606 |
| 4.215 | 4.524 | 4.269 | 3.940 | 4.646 | 0.463 | 0.606 |
| 3.246 | 3.548 | 4.472 | 2.884 | 3.496 | 0.392 | 0.606 |
| 4.055 | 5.412 | 4.184 | 5.757 | 5.495 | 0.471 | 0.606 |
| 4.612 | 5.216 | 5.214 | 4.906 | 4.880 | 0.422 | 0.606 |
| 4.775 | 3.795 | 5.274 | 2.881 | 3.470 | 0.505 | 0.606 |
| 4.813 | 4.240 | 4.634 | 3.172 | 3.996 | 0.429 | 0.606 |
| 5.196 | 5.454 | 5.202 | 5.936 | 5.634 | 0.373 | 0.606 |
| 4.354 | 6.060 | 3.621 | 6.395 | 6.746 | 0.718 | 0.606 |
| 7.511 | 7.081 | 8.739 | 6.938 | 6.947 | 0.426 | 0.606 |
| 5.099 | 3.439 | 5.834 | 2.594 | 2.057 | 0.886 | 0.606 |
| 6.034 | 6.253 | 5.116 | 6.157 | 6.206 | 0.389 | 0.606 |
| 4.544 | 4.977 | 2.520 | 4.862 | 5.436 | 0.720 | 0.606 |
| 4.106 | 4.909 | 4.819 | 4.321 | 4.278 | 0.376 | 0.606 |
| 8.631 | 8.201 | 9.518 | 7.839 | 7.764 | 0.461 | 0.606 |

|       |       |       |        |        |       |       |
|-------|-------|-------|--------|--------|-------|-------|
| 5.621 | 5.744 | 6.266 | 6.454  | 6.270  | 0.424 | 0.606 |
| 2.456 | 2.615 | 3.068 | 2.749  | 2.458  | 0.415 | 0.606 |
| 6.146 | 4.947 | 6.427 | 4.500  | 4.533  | 0.492 | 0.606 |
| 2.414 | 3.192 | 2.788 | 3.077  | 2.479  | 0.437 | 0.606 |
| 4.599 | 4.666 | 4.277 | 5.347  | 4.862  | 0.310 | 0.606 |
| 4.321 | 4.599 | 3.769 | 5.228  | 4.733  | 0.399 | 0.606 |
| 6.591 | 5.165 | 6.601 | 4.578  | 4.834  | 0.626 | 0.606 |
| 2.907 | 3.394 | 3.726 | 3.052  | 2.606  | 0.460 | 0.606 |
| 2.724 | 2.448 | 2.039 | 2.108  | 2.205  | 0.350 | 0.606 |
| 7.623 | 6.721 | 8.533 | 4.982  | 5.090  | 0.724 | 0.606 |
| 4.442 | 4.954 | 4.299 | 4.923  | 5.169  | 0.357 | 0.606 |
| 5.879 | 6.244 | 5.011 | 6.499  | 6.287  | 0.437 | 0.606 |
| 3.331 | 3.040 | 2.485 | 2.189  | 1.827  | 0.456 | 0.606 |
| 8.464 | 9.956 | 8.804 | 10.050 | 10.164 | 0.474 | 0.606 |
| 3.261 | 3.089 | 3.248 | 2.284  | 2.510  | 0.365 | 0.606 |
| 3.680 | 2.906 | 2.949 | 2.987  | 3.003  | 0.471 | 0.606 |
| 2.527 | 2.675 | 2.092 | 2.581  | 2.674  | 0.424 | 0.606 |
| 3.846 | 3.812 | 4.309 | 2.865  | 3.364  | 0.519 | 0.606 |
| 4.881 | 4.430 | 5.128 | 3.406  | 3.411  | 0.522 | 0.606 |
| 3.968 | 3.796 | 2.308 | 4.842  | 4.304  | 0.589 | 0.606 |
| 4.099 | 3.367 | 3.418 | 3.941  | 3.794  | 0.537 | 0.606 |
| 3.040 | 3.493 | 2.835 | 2.631  | 3.399  | 0.438 | 0.606 |
| 7.426 | 8.577 | 4.373 | 8.758  | 8.754  | 0.955 | 0.606 |
| 3.277 | 3.752 | 4.383 | 4.371  | 4.357  | 0.394 | 0.606 |
| 4.533 | 4.838 | 4.228 | 5.272  | 4.824  | 0.351 | 0.606 |
| 2.266 | 2.183 | 2.103 | 3.017  | 2.492  | 0.496 | 0.606 |
| 5.550 | 6.520 | 3.489 | 6.942  | 6.784  | 0.843 | 0.606 |
| 2.543 | 1.966 | 2.044 | 2.482  | 2.141  | 0.624 | 0.606 |
| 7.238 | 8.318 | 7.078 | 8.258  | 8.251  | 0.370 | 0.606 |
| 5.754 | 6.469 | 6.149 | 5.915  | 6.155  | 0.379 | 0.606 |
| 3.946 | 3.717 | 4.056 | 3.878  | 3.769  | 0.441 | 0.606 |
| 1.686 | 2.180 | 1.717 | 1.958  | 1.329  | 0.428 | 0.606 |
| 3.740 | 4.648 | 4.360 | 3.878  | 4.282  | 0.413 | 0.606 |
| 5.897 | 6.972 | 4.437 | 7.673  | 7.224  | 0.637 | 0.606 |
| 4.352 | 4.741 | 4.246 | 4.517  | 4.878  | 0.410 | 0.606 |
| 7.615 | 7.428 | 7.005 | 7.940  | 7.845  | 0.342 | 0.606 |
| 9.573 | 9.619 | 9.071 | 10.117 | 9.953  | 0.331 | 0.606 |
| 9.556 | 9.545 | 9.005 | 10.117 | 9.929  | 0.339 | 0.606 |
| 4.163 | 3.811 | 4.407 | 3.396  | 3.794  | 0.460 | 0.606 |
| 4.161 | 4.919 | 3.461 | 4.764  | 5.121  | 0.416 | 0.606 |
| 2.367 | 3.060 | 1.360 | 3.612  | 2.480  | 0.540 | 0.606 |
| 3.774 | 2.816 | 3.576 | 2.943  | 4.247  | 0.480 | 0.606 |
| 3.479 | 2.455 | 2.783 | 2.948  | 3.314  | 0.450 | 0.606 |
| 6.710 | 6.095 | 7.128 | 5.921  | 5.969  | 0.414 | 0.606 |
| 5.363 | 4.148 | 6.261 | 5.690  | 5.308  | 0.529 | 0.606 |
| 6.722 | 6.135 | 7.194 | 6.762  | 6.606  | 0.385 | 0.606 |
| 4.700 | 3.738 | 4.066 | 4.055  | 4.104  | 0.477 | 0.606 |
| 4.166 | 5.047 | 2.832 | 6.157  | 7.075  | 1.230 | 0.606 |
| 5.109 | 5.683 | 4.617 | 5.772  | 5.427  | 0.392 | 0.606 |
| 3.781 | 4.433 | 2.668 | 3.991  | 4.469  | 0.507 | 0.606 |

|       |       |       |       |       |       |       |
|-------|-------|-------|-------|-------|-------|-------|
| 2.391 | 2.502 | 2.216 | 2.536 | 2.393 | 0.436 | 0.606 |
| 3.126 | 2.948 | 3.117 | 2.343 | 2.101 | 0.517 | 0.606 |
| 2.779 | 2.795 | 1.657 | 3.134 | 2.482 | 0.413 | 0.606 |
| 6.036 | 5.186 | 5.986 | 5.225 | 5.289 | 0.422 | 0.606 |
| 2.013 | 1.710 | 3.137 | 1.423 | 1.897 | 0.467 | 0.606 |
| 8.320 | 7.256 | 8.828 | 6.291 | 6.599 | 0.548 | 0.606 |
| 8.276 | 7.973 | 9.156 | 6.869 | 7.643 | 0.537 | 0.606 |
| 3.939 | 3.376 | 3.949 | 3.452 | 3.818 | 0.358 | 0.606 |
| 3.380 | 2.433 | 2.710 | 2.534 | 2.787 | 0.497 | 0.606 |
| 9.633 | 8.477 | 9.277 | 8.509 | 8.320 | 0.396 | 0.606 |
| 8.894 | 7.137 | 8.784 | 7.631 | 7.598 | 0.515 | 0.606 |
| 7.910 | 7.174 | 7.354 | 6.519 | 6.578 | 0.419 | 0.606 |
| 9.225 | 7.982 | 8.889 | 8.118 | 8.000 | 0.414 | 0.606 |
| 9.684 | 8.537 | 9.340 | 8.552 | 8.468 | 0.393 | 0.606 |
| 9.517 | 8.265 | 9.215 | 8.441 | 8.302 | 0.391 | 0.606 |
| 5.827 | 5.461 | 7.127 | 4.918 | 4.523 | 0.570 | 0.606 |
| 8.031 | 6.964 | 7.807 | 7.124 | 6.920 | 0.378 | 0.606 |
| 5.548 | 4.923 | 6.104 | 4.684 | 4.739 | 0.497 | 0.606 |
| 4.688 | 5.652 | 3.863 | 5.908 | 5.562 | 0.600 | 0.606 |
| 2.798 | 3.709 | 2.998 | 3.659 | 3.775 | 0.403 | 0.606 |
| 3.169 | 3.497 | 4.140 | 3.484 | 3.615 | 0.501 | 0.606 |
| 2.514 | 4.547 | 3.217 | 3.021 | 2.588 | 0.592 | 0.606 |
| 6.088 | 5.123 | 4.992 | 5.714 | 5.620 | 0.803 | 0.606 |
| 2.970 | 2.250 | 2.294 | 3.576 | 3.575 | 0.486 | 0.606 |
| 8.727 | 9.234 | 7.215 | 9.393 | 9.436 | 0.538 | 0.606 |
| 6.113 | 7.666 | 3.191 | 8.054 | 7.589 | 0.929 | 0.606 |
| 4.525 | 7.364 | 7.771 | 5.865 | 5.998 | 1.043 | 0.606 |
| 5.066 | 6.619 | 4.124 | 6.632 | 6.783 | 0.682 | 0.606 |
| 2.335 | 2.699 | 2.772 | 2.765 | 2.507 | 0.321 | 0.606 |
| 4.310 | 5.019 | 3.745 | 3.972 | 4.668 | 0.623 | 0.606 |
| 4.553 | 5.369 | 3.913 | 6.584 | 6.240 | 0.843 | 0.606 |
| 4.224 | 4.492 | 2.648 | 4.762 | 4.627 | 0.552 | 0.606 |
| 2.640 | 2.982 | 2.077 | 3.817 | 3.266 | 0.480 | 0.606 |
| 5.188 | 6.013 | 6.242 | 5.212 | 6.309 | 0.479 | 0.606 |
| 5.550 | 4.928 | 3.497 | 5.988 | 5.438 | 0.622 | 0.606 |
| 6.257 | 7.124 | 5.760 | 7.351 | 7.080 | 0.480 | 0.606 |
| 6.028 | 6.732 | 6.046 | 6.855 | 6.859 | 0.351 | 0.606 |
| 1.345 | 4.969 | 4.543 | 5.955 | 5.785 | 1.015 | 0.606 |
| 3.998 | 4.864 | 4.065 | 5.154 | 5.046 | 0.366 | 0.606 |
| 2.663 | 2.801 | 1.208 | 3.184 | 2.854 | 0.447 | 0.606 |
| 5.464 | 5.917 | 4.843 | 5.942 | 5.377 | 0.402 | 0.606 |
| 5.362 | 6.123 | 5.672 | 6.602 | 6.374 | 0.380 | 0.606 |
| 4.337 | 3.724 | 3.225 | 3.998 | 3.304 | 0.495 | 0.606 |
| 4.773 | 4.190 | 4.034 | 4.174 | 4.170 | 0.651 | 0.606 |
| 3.924 | 3.402 | 2.503 | 3.232 | 2.314 | 0.725 | 0.606 |
| 5.604 | 5.808 | 5.648 | 6.264 | 6.143 | 0.447 | 0.606 |
| 6.601 | 6.014 | 6.794 | 5.488 | 5.393 | 0.434 | 0.606 |
| 8.504 | 8.769 | 7.732 | 9.054 | 8.986 | 0.360 | 0.606 |
| 2.627 | 3.494 | 2.316 | 3.233 | 4.214 | 0.422 | 0.606 |
| 5.498 | 4.272 | 2.595 | 4.501 | 4.754 | 0.752 | 0.606 |

|       |       |       |        |        |       |       |
|-------|-------|-------|--------|--------|-------|-------|
| 4.602 | 2.694 | 2.566 | 3.034  | 2.834  | 0.517 | 0.606 |
| 3.436 | 2.016 | 1.400 | 2.309  | 2.878  | 0.554 | 0.606 |
| 4.046 | 2.231 | 2.012 | 2.617  | 1.969  | 0.462 | 0.606 |
| 5.079 | 5.615 | 4.683 | 5.896  | 5.760  | 0.365 | 0.606 |
| 4.226 | 3.278 | 2.476 | 4.234  | 4.110  | 0.521 | 0.606 |
| 4.458 | 9.603 | 5.168 | 9.247  | 9.276  | 1.261 | 0.606 |
| 5.422 | 4.679 | 5.327 | 5.268  | 5.202  | 0.447 | 0.606 |
| 6.339 | 6.403 | 2.537 | 6.304  | 6.506  | 0.893 | 0.606 |
| 7.950 | 9.776 | 6.115 | 9.927  | 10.400 | 0.868 | 0.606 |
| 5.481 | 6.141 | 4.679 | 6.450  | 6.442  | 0.544 | 0.606 |
| 5.367 | 3.964 | 3.890 | 4.148  | 4.392  | 0.385 | 0.606 |
| 5.544 | 6.379 | 3.602 | 6.764  | 6.649  | 0.725 | 0.606 |
| 5.177 | 6.055 | 4.082 | 6.189  | 6.278  | 0.578 | 0.606 |
| 7.371 | 8.126 | 6.091 | 8.564  | 8.431  | 0.624 | 0.606 |
| 7.255 | 7.445 | 5.127 | 7.730  | 7.666  | 0.548 | 0.606 |
| 4.380 | 4.540 | 4.351 | 4.661  | 2.617  | 0.650 | 0.606 |
| 9.284 | 9.113 | 6.233 | 9.368  | 9.492  | 0.743 | 0.606 |
| 9.174 | 9.399 | 6.774 | 9.615  | 9.668  | 0.718 | 0.606 |
| 3.963 | 3.677 | 1.384 | 3.520  | 3.267  | 0.538 | 0.606 |
| 6.715 | 7.850 | 5.514 | 7.863  | 7.595  | 0.512 | 0.606 |
| 4.978 | 4.919 | 6.310 | 5.363  | 3.759  | 0.539 | 0.606 |
| 4.646 | 4.473 | 4.333 | 3.943  | 3.934  | 0.379 | 0.606 |
| 3.810 | 4.110 | 2.623 | 4.562  | 4.752  | 0.625 | 0.606 |
| 6.430 | 7.232 | 6.047 | 7.461  | 6.761  | 0.424 | 0.606 |
| 7.159 | 6.034 | 7.346 | 5.635  | 6.578  | 0.458 | 0.606 |
| 5.416 | 6.899 | 4.218 | 6.776  | 6.770  | 0.556 | 0.606 |
| 4.779 | 3.795 | 4.319 | 4.477  | 4.615  | 0.474 | 0.606 |
| 2.352 | 2.970 | 3.106 | 2.514  | 2.609  | 0.479 | 0.606 |
| 4.886 | 3.300 | 3.340 | 3.401  | 3.442  | 0.479 | 0.606 |
| 2.390 | 1.626 | 1.621 | 2.314  | 1.625  | 0.469 | 0.606 |
| 4.810 | 6.218 | 5.152 | 6.335  | 6.627  | 0.498 | 0.606 |
| 4.999 | 5.473 | 3.687 | 6.112  | 5.993  | 0.514 | 0.606 |
| 4.993 | 4.653 | 4.718 | 4.727  | 4.341  | 0.444 | 0.606 |
| 6.174 | 5.582 | 6.621 | 5.569  | 6.436  | 0.499 | 0.606 |
| 6.440 | 7.899 | 6.715 | 8.106  | 7.683  | 0.486 | 0.606 |
| 2.681 | 3.279 | 3.786 | 1.872  | 2.411  | 0.562 | 0.606 |
| 2.584 | 3.660 | 3.965 | 3.422  | 3.005  | 0.389 | 0.606 |
| 4.254 | 5.148 | 3.322 | 4.800  | 4.716  | 0.482 | 0.606 |
| 5.005 | 6.476 | 3.190 | 7.102  | 6.470  | 0.907 | 0.606 |
| 3.028 | 2.582 | 3.612 | 2.244  | 2.794  | 0.433 | 0.606 |
| 3.591 | 3.725 | 3.641 | 2.676  | 3.613  | 0.369 | 0.606 |
| 4.472 | 4.601 | 4.510 | 4.378  | 4.662  | 0.422 | 0.606 |
| 8.299 | 8.460 | 8.068 | 8.848  | 8.753  | 0.303 | 0.606 |
| 9.668 | 9.598 | 8.561 | 10.000 | 9.686  | 0.376 | 0.606 |
| 2.295 | 3.328 | 2.893 | 3.587  | 3.214  | 0.521 | 0.606 |
| 2.216 | 3.391 | 2.070 | 3.015  | 3.072  | 0.433 | 0.606 |
| 2.442 | 2.987 | 2.088 | 2.771  | 2.684  | 0.488 | 0.606 |
| 5.045 | 5.146 | 4.926 | 5.433  | 5.279  | 0.387 | 0.606 |
| 4.928 | 5.668 | 4.100 | 5.814  | 5.386  | 0.449 | 0.606 |
| 5.946 | 6.179 | 6.452 | 6.194  | 6.504  | 0.400 | 0.606 |



|       |       |       |       |       |       |       |
|-------|-------|-------|-------|-------|-------|-------|
| 6.953 | 6.822 | 7.549 | 5.217 | 5.908 | 0.596 | 0.606 |
| 2.741 | 3.499 | 1.872 | 3.268 | 3.465 | 0.608 | 0.606 |
| 1.879 | 2.552 | 2.562 | 2.732 | 2.245 | 0.466 | 0.606 |
| 3.773 | 3.828 | 3.915 | 3.707 | 3.431 | 0.462 | 0.606 |
| 4.704 | 3.948 | 4.220 | 5.136 | 4.175 | 0.534 | 0.606 |
| 2.834 | 4.486 | 1.367 | 5.233 | 5.206 | 0.830 | 0.606 |
| 2.159 | 1.982 | 2.377 | 1.681 | 2.794 | 0.458 | 0.606 |
| 7.299 | 6.919 | 8.147 | 6.739 | 6.905 | 0.426 | 0.606 |
| 5.684 | 5.663 | 4.446 | 5.996 | 6.522 | 0.485 | 0.606 |
| 3.653 | 3.437 | 2.009 | 3.813 | 3.764 | 0.583 | 0.606 |
| 3.662 | 5.003 | 3.814 | 5.232 | 4.922 | 0.543 | 0.606 |
| 2.636 | 3.842 | 3.303 | 3.521 | 3.213 | 0.379 | 0.606 |
| 4.030 | 4.431 | 3.038 | 5.350 | 4.874 | 0.543 | 0.606 |
| 4.656 | 5.379 | 2.075 | 5.277 | 5.127 | 0.826 | 0.606 |
| 4.128 | 3.980 | 2.933 | 3.833 | 3.736 | 0.460 | 0.606 |
| 2.417 | 1.401 | 1.924 | 2.111 | 2.304 | 0.425 | 0.606 |
| 3.193 | 3.973 | 3.429 | 4.376 | 4.652 | 0.440 | 0.606 |
| 4.927 | 4.336 | 5.566 | 4.473 | 4.489 | 0.448 | 0.606 |
| 3.679 | 2.418 | 3.301 | 2.896 | 2.947 | 0.455 | 0.606 |
| 4.155 | 3.535 | 3.946 | 2.990 | 3.930 | 0.467 | 0.606 |
| 3.259 | 2.779 | 2.839 | 2.380 | 3.045 | 0.441 | 0.606 |
| 1.878 | 2.294 | 2.060 | 1.744 | 2.042 | 0.420 | 0.606 |
| 5.369 | 5.632 | 5.096 | 4.663 | 5.334 | 0.467 | 0.606 |
| 2.641 | 2.968 | 2.687 | 2.534 | 2.077 | 0.478 | 0.606 |
| 2.888 | 4.007 | 2.602 | 3.939 | 4.109 | 0.628 | 0.606 |
| 2.924 | 4.160 | 2.885 | 3.687 | 4.441 | 0.520 | 0.606 |
| 3.661 | 3.810 | 2.340 | 3.530 | 3.787 | 0.476 | 0.606 |
| 2.911 | 1.733 | 3.134 | 1.841 | 2.581 | 0.428 | 0.606 |
| 2.942 | 3.474 | 2.690 | 3.109 | 3.321 | 0.429 | 0.606 |
| 6.970 | 6.985 | 5.954 | 7.455 | 7.430 | 0.383 | 0.606 |
| 5.664 | 5.407 | 4.818 | 5.631 | 5.691 | 0.411 | 0.606 |
| 3.428 | 3.305 | 2.612 | 2.101 | 2.619 | 0.521 | 0.606 |
| 7.943 | 7.011 | 4.196 | 7.025 | 7.201 | 0.843 | 0.606 |
| 8.570 | 7.999 | 8.799 | 8.051 | 8.298 | 0.371 | 0.606 |
| 3.426 | 2.973 | 3.381 | 4.888 | 6.264 | 0.919 | 0.606 |
| 4.888 | 5.569 | 5.163 | 5.549 | 5.859 | 0.337 | 0.606 |
| 5.853 | 6.431 | 5.648 | 6.324 | 6.452 | 0.320 | 0.606 |
| 4.529 | 5.804 | 3.679 | 6.360 | 5.893 | 0.569 | 0.606 |
| 7.171 | 5.919 | 5.829 | 7.149 | 7.008 | 0.567 | 0.606 |
| 4.336 | 5.674 | 2.354 | 6.392 | 6.404 | 0.903 | 0.606 |
| 1.730 | 3.840 | 2.812 | 2.626 | 3.242 | 0.543 | 0.606 |
| 2.262 | 2.411 | 2.461 | 3.001 | 2.794 | 0.517 | 0.606 |
| 3.106 | 2.816 | 1.731 | 2.678 | 3.870 | 0.599 | 0.606 |
| 3.357 | 4.018 | 4.028 | 2.771 | 4.265 | 0.454 | 0.606 |
| 3.570 | 3.100 | 4.266 | 2.626 | 3.664 | 0.513 | 0.606 |
| 7.011 | 5.720 | 7.807 | 5.971 | 5.968 | 0.580 | 0.606 |
| 5.548 | 4.778 | 6.712 | 4.466 | 4.246 | 0.528 | 0.606 |
| 5.324 | 5.400 | 6.243 | 3.593 | 4.067 | 0.747 | 0.606 |
| 3.025 | 3.133 | 2.262 | 3.397 | 5.179 | 0.840 | 0.606 |
| 7.204 | 6.908 | 7.428 | 6.995 | 7.386 | 0.488 | 0.606 |

|       |       |       |       |       |       |       |
|-------|-------|-------|-------|-------|-------|-------|
| 6.936 | 7.370 | 6.696 | 7.415 | 7.318 | 0.303 | 0.606 |
| 7.634 | 7.311 | 7.991 | 6.159 | 6.684 | 0.733 | 0.606 |
| 6.115 | 7.794 | 4.775 | 8.256 | 8.248 | 0.790 | 0.606 |
| 4.501 | 5.036 | 3.145 | 5.606 | 5.388 | 0.584 | 0.606 |
| 4.480 | 4.818 | 2.663 | 5.635 | 5.450 | 0.721 | 0.606 |
| 3.586 | 3.605 | 3.371 | 3.330 | 2.778 | 0.476 | 0.606 |
| 3.162 | 5.464 | 3.582 | 5.796 | 5.998 | 0.648 | 0.606 |
| 2.719 | 3.099 | 2.306 | 3.207 | 3.136 | 0.439 | 0.606 |
| 2.495 | 4.458 | 3.407 | 4.634 | 4.766 | 0.610 | 0.606 |
| 3.014 | 4.191 | 1.809 | 4.359 | 4.737 | 0.585 | 0.606 |
| 4.388 | 4.974 | 3.596 | 4.825 | 5.031 | 0.468 | 0.606 |
| 3.710 | 4.217 | 2.297 | 4.093 | 3.966 | 0.508 | 0.606 |
| 1.164 | 5.066 | 1.130 | 5.933 | 5.809 | 1.160 | 0.606 |
| 1.490 | 1.351 | 1.889 | 1.827 | 1.641 | 0.461 | 0.606 |
| 3.641 | 2.737 | 3.472 | 3.117 | 2.698 | 0.443 | 0.606 |
| 3.997 | 2.680 | 2.837 | 3.251 | 2.829 | 0.490 | 0.606 |
| 4.978 | 4.637 | 4.792 | 5.886 | 4.966 | 0.513 | 0.606 |
| 6.560 | 5.788 | 5.390 | 6.108 | 5.725 | 0.687 | 0.606 |
| 4.259 | 3.142 | 2.705 | 3.187 | 3.033 | 0.707 | 0.606 |
| 2.891 | 2.489 | 3.166 | 2.630 | 3.086 | 0.517 | 0.606 |
| 4.301 | 3.328 | 2.756 | 4.061 | 3.347 | 0.730 | 0.606 |
| 5.263 | 4.403 | 3.802 | 4.849 | 4.156 | 0.625 | 0.606 |
| 3.720 | 3.183 | 1.367 | 2.927 | 2.364 | 0.590 | 0.606 |
| 3.444 | 3.369 | 2.918 | 3.301 | 2.327 | 0.465 | 0.606 |
| 3.494 | 2.999 | 4.027 | 2.620 | 2.338 | 0.604 | 0.606 |
| 4.190 | 3.485 | 6.186 | 1.275 | 1.661 | 0.990 | 0.606 |
| 3.913 | 3.569 | 4.931 | 2.296 | 2.819 | 0.732 | 0.606 |
| 1.770 | 3.106 | 2.268 | 2.328 | 2.226 | 0.561 | 0.606 |
| 3.323 | 3.461 | 3.090 | 3.502 | 2.723 | 0.437 | 0.606 |
| 3.572 | 2.118 | 4.400 | 0.431 | 1.322 | 0.910 | 0.606 |
| 2.597 | 3.740 | 3.432 | 3.498 | 3.096 | 0.465 | 0.606 |
| 3.217 | 3.350 | 3.614 | 2.468 | 3.067 | 0.405 | 0.606 |
| 5.634 | 5.530 | 5.153 | 6.194 | 6.050 | 0.366 | 0.606 |
| 5.811 | 6.152 | 5.798 | 6.285 | 6.413 | 0.294 | 0.606 |
| 3.278 | 3.853 | 1.631 | 3.396 | 3.779 | 0.487 | 0.606 |
| 4.701 | 4.681 | 5.259 | 4.047 | 3.820 | 0.401 | 0.606 |
| 2.731 | 3.312 | 2.230 | 3.589 | 3.488 | 0.443 | 0.606 |
| 6.409 | 6.210 | 7.739 | 6.306 | 6.346 | 0.478 | 0.606 |
| 4.447 | 5.885 | 4.769 | 6.277 | 6.079 | 0.500 | 0.606 |
| 6.439 | 6.195 | 5.036 | 6.904 | 6.547 | 0.450 | 0.606 |
| 2.254 | 3.098 | 3.653 | 1.633 | 2.293 | 0.511 | 0.606 |
| 4.272 | 4.698 | 3.751 | 4.967 | 4.884 | 0.393 | 0.606 |
| 3.074 | 3.488 | 4.605 | 3.420 | 3.603 | 0.426 | 0.606 |
| 2.990 | 3.097 | 3.102 | 2.309 | 3.138 | 0.417 | 0.606 |
| 3.702 | 4.069 | 4.950 | 4.091 | 4.567 | 0.470 | 0.606 |
| 1.475 | 2.097 | 1.323 | 1.918 | 1.405 | 0.432 | 0.606 |
| 4.508 | 5.584 | 5.493 | 4.189 | 4.845 | 0.724 | 0.606 |
| 7.607 | 8.092 | 8.232 | 8.268 | 8.318 | 0.398 | 0.606 |
| 1.571 | 2.716 | 2.522 | 3.366 | 3.105 | 0.498 | 0.606 |
| 1.671 | 3.380 | 1.745 | 3.806 | 4.228 | 0.592 | 0.606 |

|       |       |        |       |       |       |       |
|-------|-------|--------|-------|-------|-------|-------|
| 2.852 | 4.344 | 3.216  | 3.358 | 3.303 | 0.510 | 0.606 |
| 2.298 | 3.442 | 2.493  | 3.332 | 3.167 | 0.436 | 0.606 |
| 4.924 | 5.426 | 4.613  | 5.580 | 5.767 | 0.399 | 0.606 |
| 6.564 | 6.445 | 7.002  | 6.292 | 6.126 | 0.330 | 0.606 |
| 7.480 | 6.709 | 7.891  | 6.080 | 6.039 | 0.470 | 0.606 |
| 3.700 | 4.162 | 3.168  | 3.759 | 4.109 | 0.434 | 0.606 |
| 2.602 | 2.745 | 3.326  | 2.618 | 2.461 | 0.413 | 0.606 |
| 7.554 | 8.206 | 6.967  | 8.149 | 8.381 | 0.392 | 0.606 |
| 3.297 | 2.337 | 2.850  | 2.010 | 2.336 | 0.521 | 0.606 |
| 1.987 | 2.756 | 1.307  | 3.046 | 3.360 | 0.533 | 0.606 |
| 6.340 | 7.079 | 5.479  | 7.854 | 7.594 | 0.559 | 0.606 |
| 7.464 | 8.351 | 7.118  | 8.867 | 8.735 | 0.569 | 0.606 |
| 1.932 | 4.248 | 2.919  | 3.591 | 2.959 | 0.633 | 0.606 |
| 4.085 | 4.327 | 3.317  | 3.420 | 4.067 | 0.571 | 0.606 |
| 2.638 | 2.480 | 2.932  | 2.222 | 2.225 | 0.423 | 0.606 |
| 1.659 | 2.548 | 2.337  | 2.105 | 2.034 | 0.382 | 0.606 |
| 2.837 | 2.461 | 3.738  | 2.690 | 2.818 | 0.429 | 0.606 |
| 4.278 | 4.010 | 2.697  | 3.932 | 4.088 | 0.448 | 0.606 |
| 1.847 | 3.960 | 1.358  | 2.798 | 2.592 | 0.765 | 0.606 |
| 7.137 | 6.129 | 8.486  | 6.023 | 5.838 | 0.575 | 0.606 |
| 4.710 | 4.895 | 5.900  | 5.086 | 5.629 | 0.522 | 0.606 |
| 6.014 | 5.138 | 6.137  | 4.644 | 6.095 | 0.793 | 0.606 |
| 4.942 | 5.144 | 5.303  | 3.784 | 4.752 | 0.783 | 0.606 |
| 4.459 | 4.153 | 4.093  | 5.093 | 4.937 | 0.412 | 0.606 |
| 6.293 | 7.278 | 8.133  | 7.192 | 6.601 | 0.656 | 0.606 |
| 2.402 | 2.115 | 3.097  | 1.592 | 2.709 | 0.487 | 0.606 |
| 2.966 | 2.321 | 0.536  | 0.499 | 2.712 | 0.554 | 0.606 |
| 3.371 | 3.661 | 0.936  | 4.965 | 3.467 | 0.802 | 0.606 |
| 4.049 | 3.968 | 5.008  | 3.677 | 3.762 | 0.477 | 0.606 |
| 3.896 | 4.030 | 3.284  | 4.475 | 4.466 | 0.423 | 0.606 |
| 3.510 | 2.935 | 4.643  | 2.537 | 2.760 | 0.516 | 0.606 |
| 6.674 | 5.783 | 6.466  | 5.185 | 5.245 | 0.410 | 0.606 |
| 6.855 | 7.766 | 3.210  | 7.890 | 7.993 | 1.000 | 0.606 |
| 5.509 | 5.102 | 6.225  | 4.407 | 4.127 | 0.520 | 0.606 |
| 8.924 | 7.564 | 9.000  | 6.408 | 6.690 | 0.689 | 0.606 |
| 8.943 | 8.829 | 8.471  | 9.216 | 9.114 | 0.304 | 0.606 |
| 4.746 | 4.483 | 3.038  | 4.935 | 4.583 | 0.448 | 0.606 |
| 4.930 | 4.639 | 5.206  | 4.493 | 4.422 | 0.342 | 0.606 |
| 1.689 | 2.568 | 1.525  | 2.293 | 2.387 | 0.407 | 0.606 |
| 5.960 | 5.861 | 6.097  | 5.677 | 5.888 | 0.441 | 0.606 |
| 8.879 | 8.266 | 10.181 | 7.007 | 7.602 | 0.617 | 0.606 |
| 6.892 | 8.458 | 5.850  | 8.482 | 8.578 | 0.617 | 0.606 |
| 6.275 | 5.917 | 7.104  | 5.707 | 5.541 | 0.411 | 0.606 |
| 6.416 | 6.990 | 4.721  | 7.280 | 7.200 | 0.793 | 0.606 |
| 4.377 | 6.734 | 3.839  | 7.139 | 7.075 | 0.954 | 0.606 |
| 4.408 | 3.715 | 4.614  | 3.339 | 3.845 | 0.397 | 0.606 |
| 5.389 | 5.389 | 5.080  | 5.220 | 5.189 | 0.361 | 0.606 |
| 5.201 | 4.585 | 4.528  | 4.520 | 5.439 | 0.433 | 0.606 |
| 7.224 | 7.280 | 5.545  | 7.405 | 7.607 | 0.435 | 0.606 |
| 5.712 | 4.852 | 4.805  | 4.639 | 4.859 | 0.481 | 0.606 |

|       |       |       |       |       |       |       |
|-------|-------|-------|-------|-------|-------|-------|
| 2.294 | 3.105 | 2.477 | 3.745 | 2.653 | 0.384 | 0.606 |
| 4.760 | 6.094 | 4.121 | 6.373 | 6.034 | 0.504 | 0.606 |
| 5.816 | 5.547 | 2.732 | 5.175 | 5.458 | 0.776 | 0.606 |
| 5.720 | 5.827 | 5.716 | 6.219 | 5.994 | 0.310 | 0.606 |
| 3.740 | 3.225 | 3.462 | 3.404 | 3.735 | 0.454 | 0.606 |
| 3.924 | 2.340 | 1.777 | 1.784 | 2.234 | 0.608 | 0.606 |
| 4.014 | 5.045 | 4.699 | 4.860 | 4.894 | 0.458 | 0.606 |
| 6.549 | 5.947 | 7.567 | 5.198 | 5.365 | 0.540 | 0.606 |
| 4.685 | 4.743 | 4.443 | 3.848 | 5.335 | 0.505 | 0.606 |
| 8.899 | 7.518 | 8.918 | 6.701 | 6.645 | 0.619 | 0.606 |
| 5.378 | 4.409 | 6.527 | 4.208 | 4.266 | 0.514 | 0.606 |
| 5.895 | 4.915 | 5.677 | 5.420 | 5.111 | 0.352 | 0.606 |
| 5.563 | 4.470 | 5.146 | 4.550 | 4.714 | 0.384 | 0.606 |
| 5.133 | 5.758 | 4.155 | 5.339 | 5.086 | 0.506 | 0.606 |
| 2.926 | 2.011 | 1.531 | 2.218 | 1.697 | 0.418 | 0.606 |
| 3.534 | 3.988 | 4.439 | 4.930 | 3.852 | 0.508 | 0.606 |
| 5.336 | 5.665 | 5.109 | 5.669 | 5.628 | 0.376 | 0.606 |
| 5.726 | 6.503 | 5.188 | 7.025 | 6.929 | 0.450 | 0.606 |
| 7.957 | 9.134 | 4.113 | 9.379 | 8.940 | 1.026 | 0.606 |
| 4.594 | 3.783 | 4.862 | 3.850 | 4.657 | 0.432 | 0.606 |
| 5.780 | 5.568 | 5.731 | 4.346 | 5.421 | 0.472 | 0.606 |
| 4.549 | 5.052 | 4.389 | 5.482 | 5.230 | 0.387 | 0.606 |
| 7.580 | 7.276 | 8.390 | 5.820 | 6.830 | 0.533 | 0.606 |
| 4.630 | 4.678 | 4.773 | 3.949 | 4.591 | 0.388 | 0.606 |
| 2.687 | 3.277 | 3.301 | 3.459 | 3.771 | 0.449 | 0.606 |
| 1.608 | 4.601 | 1.716 | 4.632 | 5.111 | 0.837 | 0.606 |
| 3.185 | 3.055 | 3.849 | 2.535 | 2.401 | 0.474 | 0.606 |
| 3.884 | 1.979 | 1.914 | 2.217 | 1.654 | 0.498 | 0.606 |
| 3.705 | 3.004 | 2.658 | 2.487 | 2.841 | 0.509 | 0.606 |
| 3.508 | 0.841 | 1.615 | 1.599 | 1.702 | 0.572 | 0.606 |
| 2.742 | 1.862 | 2.382 | 2.968 | 2.200 | 0.524 | 0.606 |
| 3.815 | 2.981 | 3.353 | 2.619 | 3.250 | 0.535 | 0.606 |
| 4.775 | 4.485 | 4.640 | 4.539 | 4.527 | 0.412 | 0.606 |
| 4.438 | 4.002 | 5.129 | 4.422 | 4.367 | 0.518 | 0.606 |
| 5.857 | 3.637 | 4.761 | 3.562 | 3.342 | 0.582 | 0.606 |
| 5.234 | 4.144 | 5.128 | 4.798 | 5.094 | 0.403 | 0.606 |
| 4.333 | 2.757 | 3.439 | 3.587 | 3.600 | 0.431 | 0.606 |
| 4.352 | 3.855 | 2.941 | 3.439 | 2.988 | 0.453 | 0.606 |
| 7.132 | 5.898 | 7.294 | 5.549 | 5.762 | 0.482 | 0.606 |
| 5.031 | 5.736 | 5.240 | 6.066 | 5.648 | 0.352 | 0.606 |
| 6.891 | 7.831 | 7.763 | 8.154 | 8.212 | 0.450 | 0.606 |
| 6.170 | 5.276 | 3.128 | 5.855 | 5.719 | 1.001 | 0.606 |
| 5.411 | 4.029 | 4.638 | 4.536 | 4.630 | 0.501 | 0.606 |
| 5.054 | 5.270 | 5.186 | 5.536 | 5.573 | 0.396 | 0.606 |
| 5.416 | 5.661 | 3.160 | 6.569 | 6.158 | 0.724 | 0.606 |
| 1.962 | 2.687 | 2.133 | 3.145 | 3.078 | 0.450 | 0.606 |
| 6.541 | 6.629 | 4.315 | 7.127 | 7.193 | 0.596 | 0.606 |
| 4.490 | 7.034 | 2.865 | 7.006 | 7.108 | 1.061 | 0.606 |
| 9.026 | 8.568 | 9.998 | 8.610 | 8.713 | 0.414 | 0.606 |
| 5.521 | 6.389 | 5.782 | 6.041 | 6.217 | 0.442 | 0.606 |

|       |       |       |       |       |       |       |
|-------|-------|-------|-------|-------|-------|-------|
| 4.595 | 6.064 | 5.237 | 6.279 | 5.918 | 0.501 | 0.606 |
| 3.670 | 3.816 | 3.930 | 4.496 | 4.386 | 0.455 | 0.606 |
| 4.804 | 5.442 | 5.399 | 6.128 | 5.967 | 0.461 | 0.606 |
| 4.817 | 4.875 | 4.794 | 4.419 | 4.837 | 0.444 | 0.606 |
| 3.641 | 4.109 | 4.648 | 3.252 | 3.763 | 0.520 | 0.606 |
| 4.933 | 5.146 | 4.293 | 4.642 | 5.224 | 0.426 | 0.606 |
| 4.030 | 4.071 | 2.769 | 3.722 | 4.374 | 0.443 | 0.606 |
| 2.674 | 4.231 | 4.318 | 5.117 | 4.384 | 0.497 | 0.606 |
| 4.613 | 5.539 | 5.436 | 5.373 | 5.708 | 0.657 | 0.606 |
| 3.926 | 5.148 | 4.598 | 4.833 | 5.509 | 0.649 | 0.606 |
| 3.579 | 4.414 | 4.257 | 4.399 | 4.118 | 0.534 | 0.606 |
| 2.597 | 2.443 | 1.930 | 2.317 | 2.951 | 0.417 | 0.606 |
| 3.136 | 3.457 | 4.097 | 4.276 | 4.304 | 0.461 | 0.606 |
| 4.541 | 3.736 | 5.378 | 4.125 | 4.008 | 0.465 | 0.606 |
| 5.423 | 5.643 | 4.199 | 5.653 | 5.842 | 0.446 | 0.606 |
| 2.772 | 3.359 | 3.162 | 2.100 | 2.994 | 0.540 | 0.606 |
| 2.326 | 2.532 | 2.553 | 1.918 | 1.762 | 0.428 | 0.606 |
| 6.201 | 6.956 | 3.318 | 7.405 | 7.312 | 0.868 | 0.606 |
| 6.586 | 6.351 | 5.838 | 6.967 | 6.625 | 0.332 | 0.606 |
| 6.808 | 7.648 | 6.663 | 7.773 | 7.754 | 0.383 | 0.606 |
| 3.205 | 3.680 | 2.947 | 3.305 | 3.450 | 0.431 | 0.606 |
| 1.720 | 2.046 | 1.749 | 1.891 | 1.768 | 0.400 | 0.606 |
| 1.910 | 1.433 | 1.442 | 3.022 | 1.644 | 0.456 | 0.606 |
| 3.893 | 3.471 | 2.452 | 3.624 | 4.867 | 0.756 | 0.606 |
| 6.795 | 6.459 | 2.784 | 6.505 | 6.771 | 0.959 | 0.606 |
| 4.604 | 6.381 | 2.292 | 6.833 | 6.594 | 0.982 | 0.606 |
| 6.712 | 6.637 | 5.012 | 6.473 | 6.677 | 0.455 | 0.606 |
| 7.182 | 7.815 | 3.829 | 8.160 | 8.328 | 1.031 | 0.606 |
| 6.071 | 5.176 | 6.448 | 3.466 | 3.528 | 0.720 | 0.606 |
| 2.107 | 1.678 | 1.394 | 2.354 | 1.903 | 0.433 | 0.606 |
| 6.814 | 7.023 | 6.314 | 7.140 | 7.330 | 0.329 | 0.606 |
| 4.772 | 5.217 | 4.364 | 4.951 | 5.269 | 0.383 | 0.606 |
| 6.537 | 6.445 | 6.964 | 6.847 | 6.918 | 0.327 | 0.606 |
| 3.486 | 2.823 | 3.836 | 2.343 | 3.137 | 0.621 | 0.606 |
| 3.969 | 3.969 | 3.949 | 4.375 | 3.859 | 0.443 | 0.606 |
| 5.787 | 4.874 | 5.446 | 5.371 | 4.866 | 0.683 | 0.606 |
| 5.711 | 5.593 | 5.483 | 5.679 | 5.034 | 0.352 | 0.606 |
| 5.524 | 5.985 | 5.411 | 6.510 | 6.462 | 0.555 | 0.606 |
| 2.141 | 2.546 | 2.071 | 3.450 | 2.650 | 0.426 | 0.606 |
| 5.196 | 6.989 | 7.381 | 7.332 | 7.271 | 0.766 | 0.606 |
| 6.084 | 7.205 | 4.476 | 7.617 | 7.564 | 0.688 | 0.606 |
| 5.755 | 5.362 | 6.959 | 4.861 | 4.809 | 0.532 | 0.606 |
| 3.066 | 6.077 | 4.428 | 6.437 | 5.928 | 0.765 | 0.606 |
| 4.517 | 3.922 | 4.483 | 4.368 | 4.458 | 0.362 | 0.606 |
| 4.953 | 4.759 | 4.208 | 5.235 | 5.448 | 0.454 | 0.606 |
| 5.177 | 5.468 | 4.088 | 5.665 | 5.596 | 0.453 | 0.606 |
| 5.507 | 5.052 | 6.100 | 5.052 | 4.922 | 0.373 | 0.606 |
| 3.833 | 4.050 | 3.398 | 4.406 | 4.308 | 0.400 | 0.606 |
| 4.380 | 3.310 | 3.190 | 3.286 | 4.279 | 0.555 | 0.606 |
| 6.385 | 4.827 | 4.882 | 4.073 | 3.570 | 0.601 | 0.606 |

|       |       |       |       |       |       |       |
|-------|-------|-------|-------|-------|-------|-------|
| 4.913 | 5.152 | 5.425 | 4.412 | 5.106 | 0.388 | 0.606 |
| 7.071 | 6.796 | 5.604 | 7.270 | 7.108 | 0.425 | 0.606 |
| 7.202 | 5.887 | 7.775 | 5.281 | 5.869 | 0.538 | 0.606 |
| 6.711 | 7.284 | 6.740 | 7.256 | 7.494 | 0.391 | 0.606 |
| 5.598 | 4.390 | 5.439 | 4.713 | 4.694 | 0.389 | 0.606 |
| 4.772 | 4.497 | 3.659 | 4.969 | 4.600 | 0.431 | 0.606 |
| 5.453 | 2.606 | 1.414 | 4.087 | 3.702 | 0.860 | 0.606 |
| 6.548 | 6.158 | 7.217 | 6.131 | 6.040 | 0.492 | 0.606 |
| 4.340 | 4.427 | 4.417 | 4.416 | 4.317 | 0.524 | 0.606 |
| 4.797 | 4.950 | 6.562 | 3.995 | 4.178 | 0.846 | 0.606 |
| 6.187 | 4.650 | 6.258 | 5.178 | 5.367 | 0.544 | 0.606 |
| 5.931 | 6.146 | 6.823 | 5.123 | 5.421 | 0.471 | 0.606 |
| 3.895 | 4.276 | 3.942 | 4.573 | 4.398 | 0.372 | 0.606 |
| 5.917 | 6.454 | 5.539 | 6.744 | 6.188 | 0.515 | 0.606 |
| 5.969 | 6.823 | 4.568 | 6.840 | 7.075 | 0.549 | 0.606 |
| 7.309 | 7.336 | 9.068 | 6.083 | 6.979 | 0.588 | 0.606 |
| 4.838 | 5.008 | 3.619 | 3.733 | 5.548 | 0.638 | 0.606 |
| 4.561 | 4.104 | 4.424 | 3.577 | 3.528 | 0.385 | 0.606 |
| 3.089 | 2.723 | 3.283 | 2.362 | 2.424 | 0.509 | 0.606 |
| 5.164 | 4.268 | 4.689 | 4.221 | 4.448 | 0.371 | 0.606 |
| 3.512 | 4.978 | 2.841 | 5.820 | 5.509 | 0.613 | 0.606 |
| 4.666 | 4.954 | 5.148 | 5.391 | 5.136 | 0.382 | 0.606 |
| 7.553 | 8.126 | 7.349 | 8.256 | 8.039 | 0.342 | 0.606 |
| 3.648 | 4.197 | 4.102 | 2.839 | 3.329 | 0.511 | 0.606 |
| 6.271 | 6.168 | 6.859 | 6.154 | 5.883 | 0.418 | 0.606 |
| 7.555 | 8.208 | 7.363 | 8.718 | 8.592 | 0.418 | 0.606 |
| 2.825 | 2.749 | 3.192 | 2.039 | 3.499 | 0.455 | 0.606 |
| 6.554 | 7.473 | 5.564 | 7.508 | 7.465 | 0.525 | 0.606 |
| 1.503 | 1.983 | 1.581 | 2.145 | 1.957 | 0.569 | 0.606 |
| 5.100 | 6.246 | 5.658 | 6.279 | 6.129 | 0.402 | 0.606 |
| 5.781 | 7.324 | 4.731 | 7.431 | 7.084 | 0.614 | 0.606 |
| 4.366 | 2.562 | 3.064 | 4.178 | 3.220 | 0.467 | 0.606 |
| 3.740 | 5.173 | 3.553 | 5.642 | 5.564 | 0.554 | 0.606 |
| 4.541 | 2.826 | 3.022 | 3.560 | 3.761 | 0.442 | 0.606 |
| 9.232 | 7.973 | 7.312 | 7.966 | 8.111 | 0.527 | 0.606 |
| 7.510 | 6.771 | 5.746 | 7.284 | 7.406 | 0.532 | 0.606 |
| 4.641 | 4.461 | 3.459 | 4.624 | 4.835 | 0.496 | 0.606 |
| 6.499 | 6.602 | 7.506 | 6.483 | 6.575 | 0.382 | 0.606 |
| 5.038 | 5.689 | 4.666 | 5.558 | 5.612 | 0.355 | 0.606 |
| 4.274 | 2.113 | 1.388 | 2.000 | 2.033 | 0.707 | 0.606 |
| 5.703 | 6.186 | 6.355 | 6.023 | 5.391 | 0.490 | 0.606 |
| 4.523 | 3.923 | 3.010 | 4.122 | 3.991 | 0.456 | 0.606 |
| 6.235 | 5.935 | 6.468 | 5.794 | 6.073 | 0.445 | 0.606 |
| 2.504 | 2.212 | 2.609 | 1.820 | 2.047 | 0.387 | 0.606 |
| 6.639 | 7.042 | 6.443 | 7.110 | 7.082 | 0.330 | 0.606 |
| 3.649 | 3.811 | 4.112 | 3.373 | 4.029 | 0.404 | 0.606 |
| 5.065 | 5.355 | 5.715 | 5.758 | 5.388 | 0.380 | 0.606 |
| 8.129 | 7.716 | 8.631 | 7.605 | 7.841 | 0.354 | 0.606 |
| 4.302 | 3.310 | 3.761 | 3.635 | 3.437 | 0.454 | 0.606 |
| 4.654 | 5.282 | 4.746 | 5.012 | 5.367 | 0.370 | 0.606 |

|       |       |       |       |       |       |       |
|-------|-------|-------|-------|-------|-------|-------|
| 5.710 | 5.929 | 5.201 | 5.310 | 5.550 | 0.469 | 0.606 |
| 7.252 | 7.330 | 7.366 | 6.377 | 6.418 | 0.442 | 0.606 |
| 4.580 | 4.711 | 3.208 | 4.755 | 4.931 | 0.401 | 0.606 |
| 7.941 | 7.920 | 6.359 | 8.201 | 7.499 | 0.444 | 0.606 |
| 8.551 | 8.278 | 8.781 | 7.633 | 8.004 | 0.355 | 0.606 |
| 7.424 | 7.862 | 7.148 | 8.342 | 8.100 | 0.334 | 0.606 |
| 4.944 | 6.115 | 6.062 | 4.449 | 3.930 | 0.670 | 0.606 |
| 3.362 | 4.058 | 3.570 | 3.646 | 4.021 | 0.427 | 0.606 |
| 4.747 | 5.281 | 4.402 | 5.429 | 5.059 | 0.396 | 0.606 |
| 6.942 | 6.764 | 6.834 | 7.397 | 6.850 | 0.386 | 0.606 |
| 3.313 | 4.315 | 4.450 | 4.051 | 4.786 | 0.467 | 0.606 |
| 3.721 | 3.663 | 4.251 | 3.786 | 4.221 | 0.386 | 0.606 |
| 5.547 | 5.478 | 5.489 | 5.744 | 5.668 | 0.297 | 0.606 |
| 6.075 | 6.967 | 5.171 | 7.502 | 6.986 | 0.535 | 0.606 |
| 4.356 | 4.557 | 4.993 | 4.234 | 4.329 | 0.418 | 0.606 |
| 5.405 | 6.075 | 6.252 | 5.725 | 6.004 | 0.471 | 0.606 |
| 6.083 | 7.635 | 3.800 | 7.923 | 7.640 | 0.859 | 0.606 |
| 3.517 | 2.889 | 2.610 | 2.161 | 2.802 | 0.436 | 0.606 |
| 6.068 | 5.854 | 5.061 | 6.168 | 6.233 | 0.414 | 0.606 |
| 5.871 | 5.767 | 5.881 | 5.445 | 5.516 | 0.319 | 0.606 |
| 3.478 | 5.673 | 2.433 | 5.837 | 5.397 | 0.793 | 0.606 |
| 6.959 | 6.427 | 7.436 | 6.013 | 6.426 | 0.368 | 0.606 |
| 6.862 | 6.418 | 7.026 | 6.648 | 6.053 | 0.353 | 0.606 |
| 5.298 | 5.897 | 5.910 | 5.224 | 4.765 | 0.382 | 0.606 |
| 2.136 | 1.598 | 1.853 | 1.933 | 1.411 | 0.360 | 0.606 |
| 6.115 | 6.318 | 5.993 | 6.494 | 6.492 | 0.328 | 0.606 |
| 5.874 | 5.277 | 6.335 | 5.068 | 5.025 | 0.407 | 0.606 |
| 5.403 | 4.568 | 5.032 | 4.709 | 4.929 | 0.399 | 0.606 |
| 5.873 | 5.018 | 5.992 | 4.878 | 5.039 | 0.406 | 0.606 |
| 3.970 | 3.616 | 3.140 | 2.711 | 3.097 | 0.500 | 0.606 |
| 4.217 | 3.996 | 5.490 | 3.273 | 3.683 | 0.453 | 0.606 |
| 4.938 | 4.569 | 5.539 | 3.237 | 3.215 | 0.536 | 0.606 |
| 2.325 | 2.538 | 1.890 | 2.763 | 3.040 | 0.556 | 0.606 |
| 8.718 | 7.954 | 9.376 | 7.708 | 7.824 | 0.426 | 0.606 |
| 6.464 | 6.784 | 5.994 | 7.287 | 7.098 | 0.411 | 0.606 |
| 3.834 | 3.860 | 3.906 | 4.931 | 4.583 | 0.397 | 0.606 |
| 4.878 | 4.863 | 4.985 | 4.436 | 5.206 | 0.343 | 0.606 |
| 5.438 | 5.069 | 4.219 | 5.405 | 5.656 | 0.381 | 0.606 |
| 5.077 | 5.022 | 5.575 | 5.101 | 5.615 | 0.370 | 0.606 |
| 5.088 | 3.374 | 4.156 | 3.865 | 3.359 | 0.534 | 0.606 |
| 6.291 | 8.177 | 3.428 | 8.222 | 8.050 | 0.928 | 0.606 |
| 8.065 | 7.446 | 8.391 | 7.658 | 7.520 | 0.459 | 0.606 |
| 4.577 | 4.467 | 5.316 | 4.098 | 4.319 | 0.430 | 0.606 |
| 2.833 | 4.858 | 1.993 | 3.025 | 3.026 | 1.171 | 0.606 |
| 5.261 | 3.674 | 5.575 | 2.537 | 3.108 | 0.692 | 0.606 |
| 7.292 | 7.566 | 6.651 | 7.652 | 7.750 | 0.352 | 0.606 |
| 5.338 | 4.137 | 4.385 | 4.276 | 4.337 | 0.509 | 0.606 |
| 3.497 | 3.525 | 3.670 | 2.769 | 3.773 | 0.427 | 0.606 |
| 7.992 | 9.011 | 6.976 | 9.229 | 8.958 | 0.568 | 0.606 |
| 6.776 | 7.843 | 5.657 | 7.286 | 6.965 | 0.504 | 0.606 |

|       |       |        |       |       |       |       |
|-------|-------|--------|-------|-------|-------|-------|
| 8.033 | 9.128 | 6.727  | 8.690 | 8.626 | 0.570 | 0.606 |
| 5.518 | 6.403 | 4.043  | 6.678 | 5.952 | 0.626 | 0.606 |
| 3.685 | 3.867 | 2.322  | 3.856 | 3.314 | 0.418 | 0.606 |
| 4.659 | 4.808 | 5.575  | 4.047 | 4.277 | 0.463 | 0.606 |
| 6.081 | 5.547 | 8.086  | 3.962 | 4.054 | 0.894 | 0.606 |
| 3.736 | 3.316 | 3.554  | 2.833 | 2.952 | 0.507 | 0.606 |
| 4.032 | 4.194 | 4.463  | 3.530 | 3.498 | 0.498 | 0.606 |
| 4.002 | 4.001 | 4.991  | 3.879 | 4.075 | 0.436 | 0.606 |
| 6.990 | 5.804 | 6.915  | 5.670 | 5.999 | 0.477 | 0.606 |
| 6.266 | 5.710 | 6.612  | 5.624 | 5.963 | 0.455 | 0.606 |
| 7.788 | 7.223 | 7.639  | 6.577 | 6.907 | 0.381 | 0.606 |
| 5.310 | 5.568 | 4.181  | 5.081 | 5.549 | 0.521 | 0.606 |
| 2.719 | 2.315 | 1.494  | 1.560 | 2.291 | 0.414 | 0.606 |
| 4.963 | 5.510 | 5.605  | 4.307 | 4.856 | 0.578 | 0.606 |
| 6.819 | 7.058 | 6.754  | 7.296 | 7.521 | 0.332 | 0.606 |
| 6.271 | 6.605 | 6.302  | 6.769 | 6.796 | 0.317 | 0.606 |
| 4.816 | 5.370 | 5.090  | 3.976 | 4.978 | 0.651 | 0.606 |
| 8.422 | 8.790 | 8.387  | 9.469 | 9.091 | 0.341 | 0.606 |
| 5.260 | 6.079 | 5.167  | 6.268 | 5.866 | 0.362 | 0.606 |
| 5.795 | 5.201 | 4.830  | 5.694 | 5.076 | 0.356 | 0.606 |
| 4.004 | 3.927 | 4.015  | 2.915 | 3.322 | 0.419 | 0.606 |
| 2.273 | 2.223 | 1.709  | 1.859 | 2.453 | 0.417 | 0.606 |
| 2.678 | 2.411 | 2.912  | 2.350 | 2.094 | 0.440 | 0.606 |
| 4.800 | 5.680 | 5.770  | 5.173 | 5.271 | 0.571 | 0.606 |
| 4.202 | 5.149 | 3.238  | 4.958 | 4.818 | 0.439 | 0.606 |
| 2.818 | 2.349 | 3.722  | 1.976 | 2.029 | 0.463 | 0.606 |
| 8.958 | 8.610 | 10.025 | 7.459 | 7.626 | 0.552 | 0.606 |
| 8.563 | 8.960 | 8.080  | 9.172 | 8.983 | 0.340 | 0.606 |
| 6.268 | 7.178 | 5.886  | 7.390 | 6.913 | 0.421 | 0.606 |
| 5.189 | 5.375 | 3.025  | 6.081 | 5.479 | 0.582 | 0.606 |
| 6.595 | 8.044 | 5.983  | 8.105 | 7.708 | 0.532 | 0.606 |
| 4.504 | 4.217 | 4.303  | 4.263 | 4.496 | 0.489 | 0.606 |
| 3.350 | 3.142 | 4.175  | 3.807 | 3.591 | 0.491 | 0.606 |
| 6.413 | 4.185 | 5.106  | 3.108 | 4.215 | 0.853 | 0.606 |
| 6.510 | 7.042 | 6.433  | 7.254 | 7.121 | 0.340 | 0.606 |
| 5.423 | 5.918 | 3.784  | 6.036 | 5.794 | 0.512 | 0.606 |
| 4.257 | 5.203 | 3.525  | 5.001 | 4.964 | 0.440 | 0.606 |
| 4.052 | 6.575 | 2.192  | 6.794 | 6.513 | 0.967 | 0.606 |
| 1.667 | 2.062 | 2.299  | 2.792 | 2.069 | 0.413 | 0.606 |
| 3.279 | 3.422 | 4.915  | 3.749 | 3.926 | 0.445 | 0.606 |
| 5.881 | 6.230 | 5.560  | 6.560 | 6.041 | 0.377 | 0.606 |
| 8.505 | 8.697 | 8.127  | 8.847 | 8.970 | 0.352 | 0.606 |
| 2.810 | 3.956 | 3.524  | 4.458 | 3.993 | 0.421 | 0.606 |
| 6.598 | 7.144 | 5.668  | 7.413 | 7.400 | 0.586 | 0.606 |
| 5.069 | 5.505 | 5.022  | 6.107 | 6.053 | 0.409 | 0.606 |
| 3.949 | 5.333 | 3.098  | 5.638 | 5.562 | 0.587 | 0.606 |
| 3.023 | 4.488 | 2.910  | 5.183 | 5.772 | 0.980 | 0.606 |
| 9.050 | 8.044 | 9.340  | 7.889 | 7.655 | 0.437 | 0.606 |
| 3.105 | 3.458 | 3.815  | 3.064 | 4.403 | 0.426 | 0.606 |
| 5.013 | 5.877 | 4.727  | 5.524 | 5.755 | 0.479 | 0.606 |



|       |       |       |       |       |       |       |
|-------|-------|-------|-------|-------|-------|-------|
| 8.380 | 7.744 | 9.454 | 7.109 | 7.275 | 0.484 | 0.606 |
| 4.034 | 4.852 | 4.661 | 4.395 | 5.300 | 0.488 | 0.606 |
| 6.050 | 5.531 | 5.975 | 4.738 | 5.201 | 0.496 | 0.606 |
| 4.244 | 3.639 | 4.311 | 3.169 | 2.716 | 0.500 | 0.606 |
| 5.240 | 5.340 | 4.799 | 4.924 | 5.994 | 0.691 | 0.606 |
| 4.194 | 3.091 | 1.421 | 3.517 | 4.205 | 0.634 | 0.606 |
| 3.804 | 5.336 | 4.430 | 2.919 | 3.431 | 0.734 | 0.606 |
| 3.964 | 4.937 | 4.490 | 4.789 | 5.113 | 0.407 | 0.606 |
| 6.003 | 5.333 | 5.743 | 4.798 | 5.861 | 0.462 | 0.606 |
| 1.947 | 2.052 | 2.006 | 2.119 | 2.229 | 0.323 | 0.606 |
| 4.430 | 4.471 | 4.259 | 3.514 | 3.873 | 0.506 | 0.606 |
| 3.390 | 3.243 | 4.129 | 2.971 | 3.632 | 0.521 | 0.606 |
| 6.999 | 9.227 | 6.452 | 9.511 | 9.388 | 0.721 | 0.606 |
| 1.984 | 2.653 | 1.440 | 3.331 | 3.630 | 0.526 | 0.606 |
| 4.971 | 4.591 | 4.674 | 3.355 | 3.969 | 0.524 | 0.606 |
| 5.062 | 4.993 | 5.048 | 4.839 | 4.732 | 0.321 | 0.606 |
| 7.275 | 6.220 | 4.958 | 6.893 | 6.765 | 0.539 | 0.606 |
| 4.173 | 3.887 | 4.242 | 3.839 | 3.784 | 0.443 | 0.606 |
| 6.597 | 6.017 | 6.050 | 5.235 | 5.195 | 0.481 | 0.606 |
| 5.528 | 5.550 | 5.452 | 5.626 | 5.721 | 0.325 | 0.606 |
| 4.663 | 4.518 | 4.708 | 3.134 | 3.968 | 0.592 | 0.606 |
| 4.099 | 6.167 | 3.297 | 6.228 | 6.405 | 0.879 | 0.606 |
| 7.597 | 7.027 | 8.186 | 6.276 | 6.319 | 0.474 | 0.606 |
| 4.657 | 5.318 | 4.192 | 5.452 | 5.297 | 0.550 | 0.606 |
| 6.849 | 6.030 | 3.939 | 6.080 | 5.927 | 0.541 | 0.606 |
| 6.690 | 5.911 | 7.897 | 5.165 | 5.182 | 0.586 | 0.606 |
| 5.715 | 5.368 | 5.635 | 4.076 | 4.659 | 0.484 | 0.606 |
| 6.788 | 6.603 | 5.728 | 6.962 | 6.656 | 0.357 | 0.606 |
| 3.696 | 3.024 | 3.646 | 2.315 | 3.260 | 0.657 | 0.606 |
| 6.321 | 5.102 | 5.958 | 5.591 | 5.532 | 0.433 | 0.606 |
| 6.132 | 5.783 | 5.559 | 5.808 | 5.668 | 0.305 | 0.606 |
| 3.734 | 4.450 | 4.635 | 2.942 | 4.085 | 0.676 | 0.606 |
| 6.383 | 7.406 | 6.806 | 7.391 | 7.218 | 0.387 | 0.606 |
| 2.805 | 3.150 | 2.858 | 2.959 | 2.915 | 0.535 | 0.606 |
| 7.013 | 7.007 | 5.790 | 7.431 | 7.238 | 0.442 | 0.606 |
| 3.622 | 2.874 | 2.889 | 3.203 | 3.768 | 0.440 | 0.606 |
| 3.949 | 2.793 | 2.954 | 3.874 | 3.918 | 0.481 | 0.606 |
| 6.106 | 5.101 | 6.492 | 4.483 | 4.848 | 0.489 | 0.606 |
| 4.414 | 4.455 | 4.916 | 3.776 | 3.478 | 0.390 | 0.606 |
| 7.135 | 5.851 | 6.988 | 5.728 | 5.595 | 0.552 | 0.606 |
| 2.811 | 2.859 | 2.346 | 2.444 | 2.272 | 0.415 | 0.606 |
| 5.259 | 4.425 | 5.707 | 3.708 | 3.849 | 0.494 | 0.606 |
| 3.514 | 3.902 | 2.700 | 4.562 | 4.010 | 0.441 | 0.606 |
| 8.294 | 6.553 | 8.624 | 4.645 | 5.642 | 0.863 | 0.606 |
| 5.747 | 4.032 | 3.830 | 4.234 | 4.392 | 0.464 | 0.606 |
| 7.833 | 8.472 | 7.215 | 8.638 | 8.441 | 0.384 | 0.606 |
| 5.959 | 6.357 | 5.701 | 6.691 | 6.382 | 0.337 | 0.606 |
| 5.775 | 5.638 | 5.300 | 5.010 | 5.378 | 0.369 | 0.606 |
| 4.083 | 3.687 | 4.400 | 3.395 | 3.976 | 0.649 | 0.606 |
| 2.879 | 3.348 | 3.834 | 3.006 | 3.139 | 0.477 | 0.606 |

|        |       |        |       |       |       |       |
|--------|-------|--------|-------|-------|-------|-------|
| 6.099  | 6.059 | 7.273  | 4.709 | 4.623 | 0.606 | 0.606 |
| 3.749  | 3.128 | 3.376  | 3.439 | 3.362 | 0.417 | 0.606 |
| 3.502  | 6.005 | 2.564  | 6.725 | 6.237 | 0.857 | 0.606 |
| 4.114  | 4.253 | 4.720  | 3.894 | 3.653 | 0.626 | 0.606 |
| 2.243  | 2.645 | 2.765  | 4.196 | 3.164 | 0.472 | 0.606 |
| 8.563  | 8.470 | 9.538  | 6.412 | 7.447 | 0.684 | 0.606 |
| 2.465  | 2.573 | 1.824  | 2.584 | 2.561 | 0.683 | 0.606 |
| 6.731  | 6.734 | 7.821  | 6.855 | 6.451 | 0.465 | 0.606 |
| 6.087  | 6.668 | 6.877  | 6.854 | 6.616 | 0.439 | 0.606 |
| 5.564  | 5.243 | 6.727  | 4.597 | 4.470 | 0.491 | 0.606 |
| 4.902  | 5.808 | 5.166  | 4.030 | 4.925 | 0.483 | 0.606 |
| 3.365  | 3.701 | 2.802  | 4.036 | 4.201 | 0.471 | 0.606 |
| 4.794  | 5.112 | 5.863  | 4.280 | 4.756 | 0.632 | 0.606 |
| 5.950  | 6.387 | 7.003  | 6.019 | 6.433 | 0.401 | 0.606 |
| 7.584  | 8.259 | 7.808  | 6.971 | 7.815 | 0.462 | 0.606 |
| 2.051  | 3.133 | 4.295  | 2.707 | 3.335 | 0.623 | 0.606 |
| 5.703  | 6.244 | 5.167  | 6.089 | 6.034 | 0.391 | 0.606 |
| 9.173  | 8.843 | 9.900  | 8.242 | 8.267 | 0.408 | 0.606 |
| 5.691  | 5.099 | 6.064  | 5.333 | 5.192 | 0.438 | 0.606 |
| 5.722  | 6.328 | 5.220  | 6.794 | 5.959 | 0.437 | 0.606 |
| 6.091  | 6.825 | 4.867  | 7.238 | 7.130 | 0.571 | 0.606 |
| 5.144  | 4.090 | 4.373  | 3.963 | 3.886 | 0.377 | 0.606 |
| 5.668  | 5.724 | 3.302  | 6.189 | 6.107 | 0.616 | 0.606 |
| 6.736  | 5.756 | 6.985  | 5.348 | 5.306 | 0.445 | 0.606 |
| 6.061  | 6.025 | 6.265  | 5.795 | 5.852 | 0.315 | 0.606 |
| 5.826  | 4.915 | 6.322  | 3.868 | 4.340 | 0.572 | 0.606 |
| 5.688  | 5.633 | 5.678  | 4.819 | 4.848 | 0.387 | 0.606 |
| 10.214 | 9.685 | 10.269 | 8.659 | 9.018 | 0.460 | 0.606 |
| 6.857  | 6.221 | 7.825  | 5.468 | 5.943 | 0.499 | 0.606 |
| 5.634  | 6.144 | 5.445  | 6.023 | 6.163 | 0.461 | 0.606 |
| 5.509  | 5.914 | 5.947  | 5.208 | 5.486 | 0.432 | 0.606 |
| 3.819  | 4.193 | 4.967  | 4.075 | 4.415 | 0.404 | 0.606 |
| 3.659  | 3.416 | 4.165  | 2.699 | 2.429 | 0.545 | 0.606 |
| 3.856  | 4.737 | 2.611  | 4.707 | 4.166 | 0.519 | 0.606 |
| 4.698  | 5.262 | 3.910  | 5.095 | 5.168 | 0.406 | 0.606 |
| 1.833  | 2.984 | 3.435  | 3.322 | 3.676 | 0.486 | 0.606 |
| 7.994  | 8.135 | 7.650  | 8.727 | 8.620 | 0.333 | 0.606 |
| 7.130  | 7.582 | 5.133  | 7.858 | 7.799 | 0.584 | 0.606 |
| 5.216  | 5.170 | 3.133  | 5.377 | 5.926 | 0.693 | 0.606 |
| 3.338  | 4.021 | 2.680  | 4.237 | 4.066 | 0.446 | 0.606 |
| 3.863  | 4.333 | 3.206  | 4.597 | 4.608 | 0.447 | 0.606 |
| 3.856  | 4.342 | 3.214  | 4.608 | 4.658 | 0.443 | 0.606 |
| 3.601  | 4.481 | 2.956  | 4.198 | 4.420 | 0.435 | 0.606 |
| 3.254  | 4.489 | 3.009  | 4.308 | 4.419 | 0.524 | 0.606 |
| 6.602  | 6.996 | 4.840  | 7.156 | 7.120 | 0.547 | 0.606 |
| 5.519  | 5.608 | 3.434  | 5.812 | 5.826 | 0.624 | 0.606 |
| 3.174  | 3.843 | 2.049  | 3.427 | 3.700 | 0.575 | 0.606 |
| 4.404  | 4.983 | 4.847  | 4.080 | 4.646 | 0.435 | 0.606 |
| 4.701  | 4.216 | 5.829  | 4.428 | 4.339 | 0.427 | 0.606 |
| 3.760  | 3.558 | 3.657  | 2.887 | 4.841 | 0.535 | 0.606 |

|       |       |       |       |       |       |       |
|-------|-------|-------|-------|-------|-------|-------|
| 3.377 | 2.935 | 2.876 | 2.629 | 2.160 | 0.419 | 0.606 |
| 7.397 | 6.754 | 6.124 | 6.852 | 7.054 | 0.404 | 0.606 |
| 2.485 | 3.282 | 4.045 | 2.997 | 2.708 | 0.394 | 0.606 |
| 3.420 | 3.407 | 3.617 | 2.948 | 3.029 | 0.350 | 0.606 |
| 6.929 | 7.082 | 6.641 | 7.250 | 7.023 | 0.342 | 0.606 |
| 5.409 | 5.506 | 6.484 | 4.861 | 5.156 | 0.421 | 0.606 |
| 5.044 | 4.859 | 4.958 | 4.881 | 4.787 | 0.340 | 0.606 |
| 6.711 | 7.236 | 6.052 | 7.484 | 7.218 | 0.400 | 0.606 |
| 5.864 | 5.807 | 5.725 | 6.045 | 6.225 | 0.359 | 0.606 |
| 5.000 | 5.523 | 5.228 | 5.657 | 5.984 | 0.359 | 0.606 |
| 1.770 | 2.130 | 2.124 | 1.553 | 2.486 | 0.475 | 0.606 |
| 1.936 | 3.633 | 2.369 | 2.919 | 2.361 | 0.477 | 0.606 |
| 1.368 | 2.564 | 2.590 | 2.695 | 2.607 | 0.418 | 0.606 |
| 1.478 | 1.693 | 1.531 | 1.707 | 1.727 | 0.608 | 0.606 |
| 6.595 | 6.121 | 6.681 | 6.175 | 5.760 | 0.363 | 0.606 |
| 6.739 | 7.293 | 6.434 | 7.743 | 7.441 | 0.392 | 0.606 |
| 3.422 | 3.964 | 3.756 | 3.851 | 3.110 | 0.458 | 0.606 |
| 3.285 | 1.861 | 2.765 | 2.178 | 2.323 | 0.489 | 0.606 |
| 4.413 | 4.960 | 5.252 | 5.595 | 5.103 | 0.396 | 0.606 |
| 5.496 | 6.094 | 5.260 | 6.175 | 6.335 | 0.377 | 0.606 |
| 2.160 | 2.863 | 2.070 | 2.951 | 3.607 | 0.721 | 0.606 |
| 3.166 | 2.941 | 2.862 | 2.826 | 2.862 | 0.507 | 0.606 |
| 2.470 | 3.156 | 2.461 | 3.855 | 3.676 | 0.456 | 0.606 |
| 6.280 | 6.127 | 6.851 | 6.297 | 6.516 | 0.370 | 0.606 |
| 4.241 | 1.999 | 2.119 | 2.237 | 2.010 | 0.770 | 0.606 |
| 3.805 | 3.820 | 3.974 | 3.210 | 3.362 | 0.466 | 0.606 |
| 2.852 | 2.179 | 2.810 | 1.942 | 2.233 | 0.470 | 0.606 |
| 5.525 | 6.476 | 5.615 | 6.720 | 6.460 | 0.387 | 0.606 |
| 3.275 | 4.196 | 2.885 | 4.954 | 4.566 | 0.500 | 0.606 |
| 0.861 | 1.889 | 0.916 | 3.646 | 1.934 | 0.576 | 0.606 |
| 2.623 | 3.757 | 3.771 | 3.713 | 2.754 | 0.758 | 0.606 |
| 2.792 | 3.113 | 3.768 | 3.819 | 3.020 | 0.449 | 0.606 |
| 3.982 | 2.848 | 4.756 | 2.006 | 2.519 | 0.602 | 0.606 |
| 7.401 | 6.674 | 8.552 | 5.277 | 5.699 | 0.618 | 0.606 |
| 6.815 | 5.811 | 7.562 | 5.479 | 5.143 | 0.508 | 0.606 |
| 3.608 | 3.359 | 3.542 | 3.919 | 3.926 | 0.317 | 0.606 |
| 3.226 | 3.555 | 3.326 | 4.164 | 4.169 | 0.398 | 0.606 |
| 2.866 | 3.286 | 2.328 | 3.764 | 3.593 | 0.387 | 0.606 |
| 4.174 | 4.956 | 4.530 | 5.144 | 5.029 | 0.381 | 0.606 |
| 1.849 | 1.281 | 2.053 | 1.929 | 2.462 | 1.117 | 0.606 |
| 7.120 | 6.820 | 8.021 | 5.926 | 6.641 | 0.509 | 0.606 |
| 3.979 | 3.802 | 3.115 | 4.337 | 4.603 | 0.880 | 0.606 |
| 7.196 | 7.730 | 6.584 | 8.147 | 8.295 | 0.472 | 0.606 |
| 4.356 | 4.964 | 2.697 | 5.042 | 4.634 | 0.539 | 0.606 |
| 4.823 | 5.488 | 2.863 | 5.942 | 5.638 | 0.698 | 0.606 |
| 6.461 | 6.864 | 6.674 | 7.584 | 7.357 | 0.377 | 0.606 |
| 5.067 | 4.644 | 6.147 | 4.364 | 4.194 | 0.434 | 0.606 |
| 2.170 | 1.153 | 2.662 | 2.661 | 2.118 | 0.545 | 0.606 |
| 3.710 | 3.128 | 2.959 | 3.118 | 3.701 | 0.408 | 0.606 |
| 3.252 | 1.778 | 3.077 | 2.445 | 1.883 | 0.621 | 0.606 |

|       |       |       |       |       |       |       |
|-------|-------|-------|-------|-------|-------|-------|
| 3.194 | 1.781 | 3.468 | 3.058 | 3.789 | 0.485 | 0.606 |
| 6.292 | 6.874 | 6.356 | 7.269 | 6.807 | 0.459 | 0.606 |
| 3.422 | 3.839 | 3.728 | 4.242 | 4.395 | 0.367 | 0.606 |
| 3.696 | 3.424 | 3.894 | 4.020 | 3.446 | 0.443 | 0.606 |
| 7.435 | 7.061 | 6.455 | 7.529 | 7.298 | 0.395 | 0.606 |
| 5.613 | 5.455 | 4.862 | 5.643 | 5.893 | 0.362 | 0.606 |
| 7.273 | 6.874 | 6.290 | 7.352 | 7.386 | 0.378 | 0.606 |
| 6.924 | 6.820 | 6.296 | 7.287 | 7.099 | 0.376 | 0.606 |
| 6.269 | 6.383 | 5.816 | 6.390 | 6.478 | 0.316 | 0.606 |
| 7.898 | 7.390 | 6.972 | 7.770 | 7.574 | 0.391 | 0.606 |
| 6.298 | 6.464 | 5.814 | 6.517 | 6.460 | 0.330 | 0.606 |
| 5.495 | 5.121 | 3.759 | 6.048 | 6.114 | 0.706 | 0.606 |
| 3.793 | 3.895 | 3.461 | 4.508 | 4.542 | 0.431 | 0.606 |
| 7.000 | 6.707 | 6.088 | 7.137 | 6.880 | 0.359 | 0.606 |
| 6.890 | 6.879 | 6.411 | 7.242 | 7.252 | 0.343 | 0.606 |
| 9.082 | 8.775 | 7.963 | 8.922 | 8.924 | 0.371 | 0.606 |
| 8.674 | 8.279 | 7.689 | 8.684 | 8.402 | 0.428 | 0.606 |
| 8.437 | 7.952 | 7.100 | 8.238 | 8.229 | 0.394 | 0.606 |
| 8.273 | 7.987 | 7.286 | 8.295 | 8.082 | 0.389 | 0.606 |
| 6.368 | 6.051 | 5.926 | 6.397 | 6.632 | 0.392 | 0.606 |
| 3.178 | 4.262 | 1.880 | 4.934 | 4.546 | 0.634 | 0.606 |
| 4.885 | 5.468 | 2.915 | 5.305 | 5.665 | 0.611 | 0.606 |
| 6.525 | 6.638 | 6.829 | 7.147 | 7.070 | 0.338 | 0.606 |
| 2.088 | 3.239 | 1.953 | 3.290 | 2.921 | 0.462 | 0.606 |
| 6.508 | 7.766 | 7.388 | 7.911 | 7.899 | 0.404 | 0.606 |
| 5.043 | 5.459 | 4.962 | 6.065 | 5.569 | 0.351 | 0.606 |
| 6.454 | 6.863 | 6.028 | 7.124 | 7.189 | 0.370 | 0.606 |
| 6.290 | 6.829 | 6.381 | 7.363 | 7.087 | 0.335 | 0.606 |
| 5.536 | 5.713 | 4.706 | 6.195 | 6.096 | 0.407 | 0.606 |
| 3.262 | 3.533 | 3.798 | 3.453 | 3.317 | 0.452 | 0.606 |
| 6.513 | 5.449 | 7.142 | 3.396 | 4.040 | 0.785 | 0.606 |
| 4.622 | 4.606 | 2.897 | 5.192 | 4.888 | 0.714 | 0.606 |
| 3.929 | 4.545 | 4.135 | 4.045 | 3.886 | 0.512 | 0.606 |
| 6.810 | 7.948 | 7.690 | 8.507 | 7.818 | 0.461 | 0.606 |
| 4.156 | 4.357 | 4.602 | 3.600 | 4.100 | 0.443 | 0.606 |
| 4.275 | 4.323 | 4.665 | 3.726 | 4.138 | 0.404 | 0.606 |
| 4.122 | 4.305 | 4.609 | 3.607 | 4.107 | 0.430 | 0.606 |
| 5.414 | 5.066 | 5.559 | 4.953 | 5.110 | 0.385 | 0.606 |
| 4.165 | 4.253 | 4.567 | 3.588 | 4.058 | 0.444 | 0.606 |
| 4.851 | 5.764 | 4.945 | 6.097 | 5.641 | 0.497 | 0.606 |
| 5.050 | 5.513 | 5.403 | 5.819 | 6.073 | 0.490 | 0.606 |
| 3.563 | 2.406 | 4.614 | 2.988 | 3.393 | 0.443 | 0.606 |
| 3.477 | 3.879 | 3.950 | 3.313 | 3.509 | 0.464 | 0.606 |
| 2.403 | 2.580 | 3.749 | 1.633 | 2.251 | 0.476 | 0.606 |
| 6.665 | 7.053 | 6.864 | 7.174 | 6.772 | 0.436 | 0.606 |
| 6.777 | 6.732 | 7.014 | 7.121 | 7.069 | 0.311 | 0.606 |
| 6.553 | 7.841 | 6.592 | 7.946 | 7.718 | 0.426 | 0.606 |
| 6.782 | 7.325 | 5.382 | 7.312 | 7.532 | 0.651 | 0.606 |
| 5.712 | 3.448 | 6.070 | 3.886 | 3.004 | 0.857 | 0.606 |
| 5.219 | 5.210 | 6.272 | 4.734 | 4.961 | 0.453 | 0.606 |

|       |       |       |       |       |       |       |
|-------|-------|-------|-------|-------|-------|-------|
| 4.014 | 3.263 | 3.933 | 3.067 | 3.009 | 0.380 | 0.606 |
| 6.236 | 6.621 | 5.700 | 6.938 | 6.854 | 0.351 | 0.606 |
| 6.639 | 7.245 | 6.507 | 7.249 | 7.183 | 0.326 | 0.606 |
| 8.021 | 9.701 | 7.297 | 9.834 | 9.863 | 0.636 | 0.606 |
| 6.787 | 7.330 | 5.813 | 7.535 | 7.399 | 0.433 | 0.606 |
| 3.717 | 3.201 | 3.762 | 2.940 | 3.189 | 0.333 | 0.606 |
| 8.101 | 8.970 | 7.271 | 9.129 | 9.185 | 0.521 | 0.606 |
| 2.767 | 1.970 | 2.708 | 2.357 | 1.913 | 0.501 | 0.606 |
| 5.408 | 5.869 | 3.491 | 6.641 | 6.190 | 0.589 | 0.606 |
| 1.730 | 2.234 | 3.235 | 3.087 | 2.973 | 0.486 | 0.606 |
| 6.041 | 5.991 | 4.911 | 6.013 | 6.544 | 0.428 | 0.606 |
| 6.351 | 5.741 | 6.653 | 5.708 | 6.041 | 0.463 | 0.606 |
| 5.049 | 4.175 | 5.000 | 4.006 | 4.261 | 0.444 | 0.606 |
| 3.517 | 3.317 | 3.595 | 2.976 | 2.829 | 0.584 | 0.606 |
| 3.838 | 3.911 | 3.363 | 4.358 | 4.715 | 0.451 | 0.606 |
| 3.433 | 3.378 | 2.028 | 4.319 | 3.959 | 0.638 | 0.606 |
| 4.901 | 4.693 | 3.298 | 4.367 | 4.650 | 0.447 | 0.606 |
| 2.853 | 3.635 | 3.722 | 3.074 | 3.075 | 0.514 | 0.606 |
| 5.367 | 5.763 | 5.298 | 5.849 | 6.109 | 0.334 | 0.606 |
| 3.852 | 3.998 | 3.446 | 4.499 | 5.085 | 0.455 | 0.606 |
| 5.755 | 6.481 | 5.915 | 6.666 | 6.475 | 0.322 | 0.606 |
| 5.724 | 5.407 | 5.240 | 6.073 | 6.132 | 0.361 | 0.606 |
| 5.023 | 3.762 | 4.096 | 4.005 | 4.459 | 0.445 | 0.606 |
| 2.643 | 2.507 | 2.251 | 2.512 | 2.710 | 0.403 | 0.606 |
| 3.658 | 4.930 | 3.687 | 5.448 | 5.206 | 0.464 | 0.606 |
| 5.014 | 4.453 | 4.115 | 5.338 | 5.770 | 0.710 | 0.606 |
| 5.443 | 6.583 | 5.629 | 6.835 | 6.697 | 0.389 | 0.606 |
| 9.319 | 9.495 | 8.584 | 9.654 | 9.886 | 0.388 | 0.606 |
| 7.439 | 7.482 | 8.385 | 6.338 | 6.378 | 0.455 | 0.606 |
| 2.427 | 2.222 | 2.085 | 1.541 | 2.143 | 0.535 | 0.606 |
| 0.853 | 1.059 | 1.017 | 1.369 | 1.828 | 1.105 | 0.606 |
| 5.225 | 6.591 | 4.515 | 7.115 | 6.948 | 0.610 | 0.606 |
| 6.356 | 7.632 | 5.607 | 7.991 | 7.280 | 0.485 | 0.606 |
| 3.778 | 1.887 | 3.041 | 2.312 | 3.315 | 0.496 | 0.606 |
| 5.759 | 4.948 | 6.036 | 3.282 | 3.191 | 0.755 | 0.606 |
| 5.886 | 6.811 | 5.009 | 6.997 | 6.969 | 0.569 | 0.606 |
| 7.979 | 7.670 | 8.093 | 8.021 | 8.334 | 0.299 | 0.606 |
| 2.721 | 3.175 | 2.359 | 3.890 | 3.803 | 0.490 | 0.606 |
| 5.826 | 6.582 | 3.616 | 6.958 | 6.513 | 0.675 | 0.606 |
| 2.518 | 3.127 | 2.964 | 4.189 | 2.989 | 0.472 | 0.606 |
| 6.045 | 7.165 | 4.772 | 7.676 | 7.867 | 0.624 | 0.606 |
| 4.895 | 6.734 | 4.091 | 6.434 | 6.346 | 0.584 | 0.606 |
| 3.614 | 3.308 | 2.925 | 2.947 | 3.462 | 0.416 | 0.606 |
| 4.670 | 5.485 | 3.508 | 6.012 | 5.457 | 0.546 | 0.606 |
| 2.875 | 6.978 | 1.907 | 7.042 | 7.098 | 1.248 | 0.606 |
| 5.998 | 6.570 | 5.698 | 6.877 | 7.034 | 0.388 | 0.606 |
| 5.068 | 4.544 | 5.629 | 4.007 | 4.179 | 0.497 | 0.606 |
| 3.739 | 2.845 | 4.943 | 2.270 | 3.032 | 0.537 | 0.606 |
| 8.315 | 7.966 | 8.271 | 7.361 | 7.541 | 0.332 | 0.606 |
| 4.803 | 4.278 | 4.268 | 4.067 | 4.270 | 0.314 | 0.606 |

|       |       |       |       |       |       |       |
|-------|-------|-------|-------|-------|-------|-------|
| 4.271 | 4.347 | 5.515 | 4.111 | 4.260 | 0.458 | 0.606 |
| 3.318 | 4.070 | 3.292 | 4.787 | 4.834 | 0.499 | 0.606 |
| 4.533 | 3.412 | 6.178 | 2.754 | 3.542 | 0.750 | 0.606 |
| 4.002 | 2.408 | 3.676 | 2.267 | 2.159 | 0.835 | 0.606 |
| 3.411 | 3.788 | 3.399 | 3.530 | 3.495 | 0.706 | 0.606 |
| 2.673 | 1.292 | 1.662 | 1.726 | 1.194 | 0.576 | 0.606 |
| 4.243 | 3.616 | 3.871 | 4.735 | 4.435 | 0.426 | 0.606 |
| 3.992 | 5.969 | 3.008 | 6.118 | 6.054 | 0.714 | 0.606 |
| 4.001 | 3.985 | 4.088 | 3.381 | 4.431 | 0.464 | 0.606 |
| 4.599 | 4.780 | 4.031 | 3.944 | 4.775 | 0.481 | 0.606 |
| 2.511 | 2.041 | 3.341 | 2.348 | 2.429 | 0.746 | 0.606 |
| 2.672 | 3.955 | 2.079 | 4.188 | 4.020 | 0.653 | 0.606 |
| 1.684 | 2.088 | 3.023 | 2.178 | 2.690 | 0.381 | 0.606 |
| 4.087 | 5.047 | 4.049 | 4.799 | 5.169 | 0.463 | 0.606 |
| 7.075 | 6.999 | 6.151 | 7.228 | 7.125 | 0.357 | 0.606 |
| 4.228 | 1.636 | 1.435 | 1.304 | 1.030 | 0.833 | 0.606 |
| 4.810 | 4.078 | 2.383 | 4.527 | 4.708 | 0.644 | 0.606 |
| 6.269 | 7.809 | 6.560 | 7.875 | 7.873 | 0.518 | 0.606 |
| 2.923 | 3.205 | 3.684 | 2.470 | 2.906 | 0.442 | 0.606 |
| 3.585 | 3.745 | 2.948 | 3.192 | 3.954 | 0.404 | 0.606 |
| 5.497 | 5.322 | 7.273 | 4.239 | 4.542 | 0.645 | 0.606 |
| 4.759 | 5.751 | 4.389 | 5.249 | 4.979 | 0.493 | 0.606 |
| 4.646 | 4.282 | 5.140 | 4.490 | 4.158 | 0.438 | 0.606 |
| 4.114 | 3.546 | 4.977 | 2.594 | 2.314 | 0.577 | 0.606 |
| 6.662 | 6.048 | 7.689 | 5.482 | 5.730 | 0.482 | 0.606 |
| 3.306 | 4.034 | 1.388 | 5.093 | 4.439 | 0.724 | 0.606 |
| 2.861 | 3.146 | 3.900 | 3.460 | 2.905 | 0.648 | 0.606 |
| 3.610 | 4.548 | 3.620 | 4.526 | 4.682 | 0.441 | 0.606 |
| 3.788 | 4.657 | 3.798 | 4.599 | 4.412 | 0.404 | 0.606 |
| 3.803 | 4.799 | 3.868 | 4.773 | 4.612 | 0.408 | 0.606 |
| 4.131 | 5.678 | 2.907 | 5.661 | 5.321 | 0.639 | 0.606 |
| 4.981 | 4.657 | 4.205 | 5.573 | 5.681 | 0.528 | 0.606 |
| 4.186 | 4.037 | 4.608 | 3.764 | 3.425 | 0.445 | 0.606 |
| 3.639 | 4.527 | 5.398 | 4.343 | 4.962 | 0.458 | 0.606 |
| 2.694 | 3.386 | 2.069 | 3.726 | 3.522 | 0.471 | 0.606 |
| 2.007 | 2.861 | 2.548 | 3.570 | 2.552 | 0.404 | 0.606 |
| 1.885 | 1.573 | 2.380 | 2.308 | 2.195 | 0.460 | 0.606 |
| 2.764 | 2.795 | 2.463 | 2.685 | 2.736 | 0.398 | 0.606 |
| 6.764 | 6.103 | 7.561 | 5.918 | 6.293 | 0.419 | 0.606 |
| 4.718 | 3.872 | 5.003 | 3.020 | 3.772 | 0.713 | 0.606 |
| 3.201 | 2.832 | 2.100 | 3.119 | 2.894 | 0.861 | 0.606 |
| 4.796 | 6.854 | 3.593 | 6.452 | 6.469 | 0.689 | 0.606 |
| 7.335 | 6.291 | 6.858 | 7.099 | 6.812 | 0.581 | 0.606 |
| 3.645 | 2.244 | 3.231 | 1.958 | 2.098 | 0.473 | 0.606 |
| 5.641 | 4.838 | 6.573 | 4.383 | 4.793 | 0.473 | 0.606 |
| 4.806 | 4.880 | 4.850 | 4.338 | 4.680 | 0.339 | 0.606 |
| 4.825 | 5.506 | 5.286 | 4.278 | 4.901 | 0.419 | 0.606 |
| 4.783 | 5.479 | 5.299 | 4.244 | 4.874 | 0.428 | 0.606 |
| 3.813 | 3.524 | 3.231 | 2.558 | 3.163 | 0.363 | 0.606 |
| 2.466 | 2.634 | 2.458 | 2.228 | 2.367 | 0.306 | 0.606 |

|       |       |       |       |       |       |       |
|-------|-------|-------|-------|-------|-------|-------|
| 2.875 | 2.916 | 2.724 | 2.251 | 2.682 | 0.326 | 0.606 |
| 3.314 | 3.406 | 3.011 | 2.279 | 3.163 | 0.356 | 0.606 |
| 3.693 | 3.604 | 3.382 | 2.682 | 3.376 | 0.326 | 0.606 |
| 3.490 | 3.322 | 3.112 | 2.342 | 3.153 | 0.345 | 0.606 |
| 7.505 | 7.384 | 6.796 | 7.911 | 8.030 | 0.358 | 0.606 |
| 3.306 | 3.466 | 4.737 | 3.072 | 3.270 | 0.475 | 0.606 |
| 5.499 | 5.340 | 5.735 | 5.620 | 6.023 | 0.345 | 0.606 |
| 4.433 | 5.051 | 5.905 | 4.642 | 4.950 | 0.611 | 0.606 |
| 5.742 | 6.375 | 5.757 | 6.245 | 6.286 | 0.395 | 0.606 |
| 4.863 | 4.544 | 6.076 | 4.407 | 4.171 | 0.462 | 0.606 |
| 3.230 | 3.555 | 3.529 | 3.091 | 3.074 | 0.483 | 0.606 |
| 3.535 | 3.810 | 4.553 | 2.456 | 3.361 | 0.590 | 0.606 |
| 7.233 | 7.110 | 7.568 | 6.680 | 6.788 | 0.360 | 0.606 |
| 5.613 | 4.848 | 5.373 | 5.347 | 4.835 | 0.431 | 0.606 |
| 4.113 | 2.917 | 2.674 | 4.085 | 3.684 | 0.477 | 0.606 |
| 5.356 | 5.729 | 4.554 | 5.849 | 5.437 | 0.453 | 0.606 |
| 3.573 | 3.593 | 3.749 | 3.886 | 3.991 | 0.425 | 0.606 |
| 3.742 | 4.384 | 2.401 | 4.473 | 5.158 | 0.599 | 0.606 |
| 2.996 | 2.858 | 3.614 | 2.693 | 2.755 | 0.438 | 0.606 |
| 7.059 | 7.137 | 6.102 | 7.583 | 7.630 | 0.407 | 0.606 |
| 2.949 | 1.619 | 1.999 | 3.723 | 3.567 | 0.826 | 0.606 |
| 8.410 | 7.842 | 8.613 | 7.533 | 8.254 | 0.362 | 0.606 |
| 2.741 | 1.985 | 3.385 | 1.550 | 2.141 | 0.554 | 0.606 |
| 3.106 | 2.530 | 2.389 | 3.408 | 3.425 | 0.472 | 0.606 |
| 4.198 | 4.163 | 3.300 | 4.228 | 4.214 | 0.370 | 0.606 |
| 4.888 | 5.850 | 4.792 | 6.539 | 5.938 | 0.449 | 0.606 |
| 3.194 | 2.908 | 2.477 | 3.317 | 3.627 | 0.427 | 0.606 |
| 6.470 | 6.971 | 5.666 | 7.245 | 7.281 | 0.454 | 0.606 |
| 4.087 | 3.434 | 3.937 | 2.549 | 3.487 | 0.596 | 0.606 |
| 2.608 | 4.641 | 2.567 | 4.300 | 4.653 | 0.611 | 0.606 |
| 3.829 | 3.591 | 3.905 | 3.385 | 3.515 | 0.358 | 0.606 |
| 2.050 | 3.250 | 1.489 | 4.246 | 3.757 | 0.641 | 0.606 |
| 4.441 | 7.432 | 4.452 | 7.499 | 7.551 | 0.793 | 0.606 |
| 5.761 | 5.464 | 6.630 | 4.440 | 4.838 | 0.538 | 0.606 |
| 5.080 | 6.206 | 4.233 | 6.324 | 5.953 | 0.538 | 0.606 |
| 4.838 | 5.467 | 4.341 | 4.556 | 5.271 | 0.399 | 0.606 |
| 7.986 | 8.345 | 8.027 | 8.315 | 8.834 | 0.386 | 0.606 |
| 5.286 | 6.260 | 4.649 | 5.146 | 5.846 | 0.475 | 0.606 |
| 3.063 | 3.315 | 3.425 | 2.937 | 3.243 | 0.432 | 0.606 |
| 4.489 | 4.962 | 4.798 | 4.288 | 4.862 | 0.410 | 0.606 |
| 3.818 | 3.059 | 1.386 | 2.965 | 3.177 | 0.623 | 0.606 |
| 3.080 | 4.921 | 1.612 | 5.495 | 5.192 | 0.782 | 0.606 |
| 5.810 | 6.438 | 6.070 | 7.075 | 6.782 | 0.400 | 0.606 |
| 6.010 | 7.076 | 3.108 | 7.498 | 7.102 | 0.956 | 0.606 |
| 4.351 | 4.748 | 4.832 | 3.675 | 4.444 | 0.489 | 0.606 |
| 5.463 | 5.310 | 5.861 | 3.608 | 4.515 | 0.653 | 0.606 |
| 3.459 | 3.212 | 3.181 | 3.092 | 2.582 | 0.397 | 0.606 |
| 8.202 | 7.608 | 8.657 | 7.811 | 7.735 | 0.397 | 0.606 |
| 4.930 | 4.046 | 6.286 | 3.850 | 4.970 | 0.507 | 0.606 |
| 2.138 | 3.220 | 1.454 | 2.754 | 3.087 | 0.433 | 0.606 |

|       |       |       |       |       |       |       |
|-------|-------|-------|-------|-------|-------|-------|
| 4.286 | 3.490 | 4.126 | 2.561 | 2.270 | 0.638 | 0.606 |
| 6.521 | 6.725 | 7.286 | 7.061 | 6.865 | 0.347 | 0.606 |
| 7.029 | 7.249 | 7.753 | 7.418 | 7.470 | 0.344 | 0.606 |
| 7.714 | 7.628 | 6.595 | 7.407 | 7.727 | 0.387 | 0.606 |
| 6.342 | 6.551 | 3.238 | 6.726 | 6.647 | 0.764 | 0.606 |
| 6.356 | 6.769 | 3.426 | 7.292 | 7.015 | 0.782 | 0.606 |
| 4.572 | 6.035 | 3.640 | 6.083 | 6.032 | 0.601 | 0.606 |
| 3.505 | 4.741 | 2.048 | 5.295 | 4.972 | 0.742 | 0.606 |
| 6.442 | 7.275 | 3.783 | 7.847 | 7.458 | 0.923 | 0.606 |
| 5.704 | 4.755 | 5.512 | 3.921 | 4.530 | 0.461 | 0.606 |
| 6.989 | 6.746 | 7.594 | 5.841 | 6.782 | 0.396 | 0.606 |
| 2.851 | 2.843 | 3.752 | 3.393 | 2.229 | 0.470 | 0.606 |
| 5.451 | 6.325 | 6.101 | 6.622 | 6.667 | 0.354 | 0.606 |
| 5.146 | 4.901 | 4.851 | 5.573 | 5.714 | 0.371 | 0.606 |
| 4.057 | 4.465 | 4.958 | 4.207 | 4.334 | 0.413 | 0.606 |
| 4.282 | 4.249 | 4.481 | 4.392 | 5.028 | 0.323 | 0.606 |
| 5.183 | 5.484 | 5.983 | 5.550 | 5.895 | 0.429 | 0.606 |
| 3.937 | 3.695 | 1.880 | 3.316 | 4.107 | 0.717 | 0.606 |
| 5.915 | 5.687 | 5.621 | 6.127 | 5.953 | 0.392 | 0.606 |
| 3.152 | 4.049 | 3.188 | 3.272 | 3.559 | 0.357 | 0.606 |
| 6.230 | 5.926 | 3.792 | 6.515 | 6.794 | 0.756 | 0.606 |
| 1.699 | 2.797 | 1.229 | 2.925 | 2.236 | 0.451 | 0.606 |
| 9.369 | 8.753 | 7.705 | 9.300 | 9.483 | 0.486 | 0.606 |
| 8.834 | 8.166 | 7.041 | 8.766 | 9.032 | 0.522 | 0.606 |
| 4.213 | 5.283 | 5.916 | 4.797 | 4.609 | 0.451 | 0.606 |
| 5.409 | 5.318 | 5.782 | 5.316 | 5.042 | 0.367 | 0.606 |
| 3.928 | 3.413 | 3.749 | 3.055 | 3.375 | 0.459 | 0.606 |
| 9.016 | 7.940 | 9.643 | 7.315 | 7.302 | 0.538 | 0.606 |
| 4.128 | 3.853 | 4.443 | 3.373 | 3.691 | 0.336 | 0.606 |
| 2.728 | 4.062 | 3.475 | 1.134 | 3.192 | 0.762 | 0.606 |
| 3.443 | 3.597 | 3.856 | 3.592 | 2.967 | 0.388 | 0.606 |
| 4.593 | 4.226 | 4.540 | 3.652 | 3.688 | 0.373 | 0.606 |
| 4.086 | 4.861 | 4.970 | 4.388 | 4.484 | 0.614 | 0.606 |
| 5.849 | 4.185 | 4.179 | 4.887 | 4.632 | 0.761 | 0.606 |
| 4.352 | 3.423 | 4.456 | 3.067 | 2.988 | 0.446 | 0.606 |
| 1.845 | 2.008 | 2.870 | 2.820 | 2.154 | 0.512 | 0.606 |
| 9.316 | 8.135 | 9.083 | 7.929 | 7.676 | 0.436 | 0.606 |
| 9.484 | 8.309 | 9.814 | 8.158 | 8.222 | 0.469 | 0.606 |
| 4.021 | 4.253 | 3.256 | 4.813 | 4.472 | 0.415 | 0.606 |
| 5.928 | 4.708 | 3.883 | 5.047 | 4.902 | 0.488 | 0.606 |
| 4.030 | 3.847 | 4.582 | 4.152 | 4.162 | 0.502 | 0.606 |
| 5.510 | 5.586 | 6.466 | 5.555 | 5.940 | 0.418 | 0.606 |
| 5.567 | 5.048 | 5.160 | 4.439 | 4.996 | 0.380 | 0.606 |
| 4.950 | 5.180 | 6.451 | 4.752 | 4.830 | 0.422 | 0.606 |
| 7.112 | 8.940 | 6.943 | 9.215 | 9.088 | 0.600 | 0.606 |
| 4.452 | 3.385 | 4.320 | 2.734 | 3.678 | 0.611 | 0.606 |
| 2.775 | 2.403 | 1.965 | 2.901 | 2.533 | 0.410 | 0.606 |
| 6.916 | 7.959 | 7.118 | 7.966 | 7.915 | 0.355 | 0.606 |
| 7.872 | 8.279 | 7.977 | 8.117 | 8.002 | 0.323 | 0.606 |
| 4.102 | 4.463 | 3.530 | 4.818 | 4.392 | 0.432 | 0.606 |



|       |       |       |       |       |       |       |
|-------|-------|-------|-------|-------|-------|-------|
| 3.126 | 3.830 | 3.874 | 3.266 | 3.302 | 0.412 | 0.606 |
| 4.973 | 5.475 | 2.985 | 6.345 | 5.818 | 0.668 | 0.606 |
| 4.027 | 3.893 | 4.487 | 3.353 | 3.370 | 0.449 | 0.606 |
| 4.960 | 5.170 | 4.462 | 5.279 | 5.129 | 0.314 | 0.606 |
| 4.867 | 5.676 | 3.701 | 6.548 | 5.368 | 0.637 | 0.606 |
| 3.906 | 3.448 | 4.334 | 3.728 | 3.892 | 0.457 | 0.606 |
| 6.462 | 7.062 | 2.852 | 7.863 | 7.464 | 0.970 | 0.606 |
| 5.413 | 5.763 | 5.653 | 5.630 | 5.527 | 0.348 | 0.606 |
| 3.420 | 2.549 | 3.616 | 2.529 | 3.403 | 0.456 | 0.606 |
| 3.400 | 3.853 | 3.628 | 3.137 | 3.749 | 0.357 | 0.606 |
| 2.379 | 2.899 | 1.684 | 2.567 | 3.429 | 0.405 | 0.606 |
| 4.364 | 5.157 | 4.032 | 5.937 | 4.607 | 0.557 | 0.606 |
| 5.738 | 6.577 | 5.889 | 6.802 | 6.618 | 0.407 | 0.606 |
| 6.299 | 6.879 | 3.860 | 6.987 | 6.865 | 0.698 | 0.606 |
| 6.354 | 5.883 | 2.632 | 5.037 | 5.630 | 0.924 | 0.606 |
| 5.630 | 6.082 | 2.571 | 6.640 | 6.467 | 0.860 | 0.606 |
| 6.095 | 5.054 | 4.861 | 5.552 | 5.270 | 0.476 | 0.606 |
| 7.677 | 7.511 | 7.152 | 7.818 | 7.941 | 0.286 | 0.606 |
| 3.503 | 3.412 | 3.233 | 4.028 | 4.100 | 0.390 | 0.606 |
| 3.480 | 3.453 | 2.298 | 2.951 | 3.737 | 0.391 | 0.606 |
| 4.373 | 5.442 | 5.021 | 5.575 | 5.305 | 0.374 | 0.606 |
| 1.009 | 1.828 | 1.264 | 1.402 | 1.067 | 0.795 | 0.606 |
| 6.833 | 6.463 | 7.096 | 7.178 | 7.100 | 0.314 | 0.606 |
| 9.103 | 9.177 | 8.895 | 9.520 | 9.692 | 0.314 | 0.606 |
| 8.780 | 9.523 | 6.531 | 9.572 | 9.334 | 0.641 | 0.606 |
| 5.252 | 5.126 | 6.762 | 4.650 | 4.948 | 0.753 | 0.606 |
| 5.054 | 5.345 | 3.617 | 5.763 | 5.794 | 0.587 | 0.606 |
| 4.535 | 4.654 | 3.235 | 4.439 | 4.281 | 0.483 | 0.606 |
| 4.010 | 4.673 | 3.880 | 4.702 | 4.866 | 0.405 | 0.606 |
| 7.741 | 7.712 | 7.434 | 7.603 | 7.951 | 0.384 | 0.606 |
| 4.713 | 4.159 | 5.109 | 3.995 | 4.286 | 0.478 | 0.606 |
| 4.605 | 5.656 | 5.001 | 5.852 | 5.426 | 0.367 | 0.606 |
| 6.034 | 5.727 | 6.108 | 6.037 | 6.227 | 0.463 | 0.606 |
| 4.751 | 4.408 | 4.161 | 4.723 | 4.970 | 0.364 | 0.606 |
| 4.516 | 4.969 | 4.107 | 5.089 | 4.726 | 0.343 | 0.606 |
| 3.617 | 2.689 | 2.918 | 2.779 | 2.706 | 0.412 | 0.606 |
| 4.125 | 3.297 | 4.613 | 3.133 | 3.782 | 0.395 | 0.606 |
| 3.551 | 3.769 | 2.658 | 4.187 | 3.810 | 0.402 | 0.606 |
| 6.184 | 7.038 | 6.021 | 6.982 | 7.377 | 0.383 | 0.606 |
| 7.668 | 7.557 | 8.497 | 6.940 | 6.255 | 0.454 | 0.606 |
| 5.518 | 5.757 | 3.471 | 6.089 | 6.224 | 0.640 | 0.606 |
| 4.905 | 4.949 | 4.962 | 4.915 | 4.564 | 0.364 | 0.606 |
| 5.123 | 4.602 | 4.914 | 3.271 | 5.322 | 0.620 | 0.606 |
| 4.025 | 3.904 | 4.452 | 4.345 | 4.134 | 0.361 | 0.606 |
| 4.931 | 3.814 | 3.714 | 3.586 | 4.456 | 0.666 | 0.606 |
| 7.318 | 7.167 | 8.046 | 8.066 | 8.860 | 0.612 | 0.606 |
| 6.234 | 6.851 | 6.445 | 7.373 | 7.045 | 0.387 | 0.606 |
| 3.780 | 3.294 | 4.629 | 3.252 | 3.530 | 0.472 | 0.606 |
| 5.848 | 6.810 | 3.766 | 6.841 | 6.664 | 0.653 | 0.606 |
| 5.619 | 6.579 | 3.104 | 6.904 | 6.526 | 0.801 | 0.606 |

|        |       |        |       |       |       |       |
|--------|-------|--------|-------|-------|-------|-------|
| 7.505  | 7.958 | 7.260  | 8.515 | 8.446 | 0.368 | 0.606 |
| 3.472  | 4.542 | 3.742  | 4.837 | 4.959 | 0.444 | 0.606 |
| 6.954  | 7.553 | 6.986  | 8.188 | 7.787 | 0.384 | 0.606 |
| 6.885  | 8.862 | 7.245  | 8.936 | 8.692 | 0.699 | 0.606 |
| 2.963  | 3.398 | 1.454  | 3.217 | 3.377 | 0.508 | 0.606 |
| 3.767  | 5.055 | 2.021  | 5.477 | 5.180 | 0.703 | 0.606 |
| 6.587  | 6.481 | 5.633  | 7.262 | 7.210 | 0.397 | 0.606 |
| 3.089  | 4.028 | 3.245  | 4.565 | 4.095 | 0.423 | 0.606 |
| 4.376  | 5.629 | 3.803  | 6.266 | 5.755 | 0.613 | 0.606 |
| 2.992  | 2.972 | 2.906  | 2.762 | 2.422 | 0.439 | 0.606 |
| 5.131  | 4.312 | 4.487  | 4.330 | 4.590 | 0.314 | 0.606 |
| 4.575  | 5.722 | 4.879  | 3.794 | 4.105 | 0.526 | 0.606 |
| 6.649  | 7.410 | 6.933  | 7.591 | 7.541 | 0.310 | 0.606 |
| 5.190  | 4.865 | 4.943  | 5.274 | 5.157 | 0.373 | 0.606 |
| 3.660  | 4.191 | 3.844  | 3.320 | 2.719 | 0.513 | 0.606 |
| 4.804  | 5.203 | 4.752  | 4.267 | 4.176 | 0.419 | 0.606 |
| 5.248  | 5.096 | 4.617  | 4.959 | 4.626 | 0.430 | 0.606 |
| 7.906  | 7.599 | 7.178  | 6.976 | 6.488 | 0.465 | 0.606 |
| 5.438  | 5.397 | 5.024  | 4.791 | 4.542 | 0.408 | 0.606 |
| 6.534  | 6.642 | 5.763  | 6.377 | 5.854 | 0.441 | 0.606 |
| 5.972  | 6.465 | 5.561  | 6.159 | 5.576 | 0.433 | 0.606 |
| 8.014  | 7.857 | 7.434  | 7.320 | 6.505 | 0.477 | 0.606 |
| 6.072  | 6.457 | 5.692  | 5.765 | 4.834 | 0.430 | 0.606 |
| 5.847  | 5.941 | 5.559  | 5.231 | 5.231 | 0.382 | 0.606 |
| 7.062  | 6.888 | 5.999  | 6.491 | 6.148 | 0.491 | 0.606 |
| 4.121  | 4.189 | 4.504  | 4.424 | 3.250 | 0.610 | 0.606 |
| 4.168  | 3.857 | 4.067  | 4.194 | 3.195 | 0.491 | 0.606 |
| 6.391  | 6.663 | 6.113  | 6.236 | 5.626 | 0.475 | 0.606 |
| 3.967  | 5.268 | 4.727  | 4.919 | 3.870 | 0.453 | 0.606 |
| 6.751  | 7.292 | 5.860  | 7.709 | 7.654 | 0.417 | 0.606 |
| 4.026  | 3.811 | 4.532  | 2.855 | 3.301 | 0.479 | 0.606 |
| 5.141  | 8.265 | 6.564  | 7.749 | 7.202 | 0.732 | 0.606 |
| 4.925  | 6.689 | 3.753  | 6.661 | 6.336 | 0.701 | 0.606 |
| 5.146  | 5.427 | 4.649  | 5.866 | 5.511 | 0.431 | 0.606 |
| 4.528  | 4.147 | 4.859  | 3.902 | 3.730 | 0.494 | 0.606 |
| 6.776  | 8.820 | 7.190  | 8.801 | 8.567 | 0.582 | 0.606 |
| 1.506  | 2.109 | 2.383  | 2.482 | 2.141 | 0.447 | 0.606 |
| 4.414  | 6.340 | 3.506  | 6.689 | 6.762 | 0.732 | 0.606 |
| 2.092  | 3.100 | 2.051  | 3.627 | 3.410 | 0.445 | 0.606 |
| 6.622  | 4.537 | 7.290  | 4.309 | 4.152 | 0.759 | 0.606 |
| 3.494  | 2.995 | 3.148  | 3.168 | 2.900 | 0.539 | 0.606 |
| 4.048  | 3.598 | 3.341  | 3.627 | 3.854 | 0.384 | 0.606 |
| 3.081  | 3.278 | 2.891  | 4.362 | 3.593 | 0.506 | 0.606 |
| 6.002  | 6.353 | 4.505  | 6.697 | 5.939 | 0.470 | 0.606 |
| 2.876  | 5.306 | 2.834  | 5.270 | 4.594 | 0.612 | 0.606 |
| 4.407  | 4.458 | 4.007  | 3.628 | 3.158 | 0.466 | 0.606 |
| 3.006  | 2.765 | 3.301  | 3.101 | 2.472 | 0.413 | 0.606 |
| 10.062 | 8.960 | 10.177 | 7.021 | 7.623 | 0.685 | 0.606 |
| 3.923  | 3.362 | 4.000  | 3.317 | 4.571 | 0.417 | 0.606 |
| 6.699  | 6.166 | 7.279  | 5.543 | 5.515 | 0.453 | 0.606 |

|       |       |       |       |       |       |       |
|-------|-------|-------|-------|-------|-------|-------|
| 6.058 | 5.141 | 5.812 | 5.080 | 5.576 | 0.362 | 0.606 |
| 3.849 | 1.523 | 1.870 | 1.886 | 2.610 | 0.628 | 0.606 |
| 6.765 | 7.457 | 6.842 | 7.684 | 7.548 | 0.345 | 0.606 |
| 6.186 | 7.020 | 6.785 | 7.358 | 7.285 | 0.380 | 0.606 |
| 6.140 | 5.896 | 5.925 | 5.365 | 6.046 | 0.482 | 0.606 |
| 5.730 | 5.621 | 6.534 | 4.766 | 5.195 | 0.385 | 0.606 |
| 5.779 | 6.981 | 3.448 | 7.438 | 7.613 | 0.906 | 0.606 |
| 5.754 | 6.243 | 4.865 | 6.919 | 6.647 | 0.485 | 0.606 |
| 4.190 | 6.706 | 2.778 | 7.202 | 6.816 | 0.991 | 0.606 |
| 4.507 | 3.995 | 4.641 | 4.473 | 4.607 | 0.460 | 0.606 |
| 2.037 | 2.677 | 1.291 | 3.320 | 3.518 | 0.531 | 0.606 |
| 4.785 | 4.379 | 4.970 | 3.498 | 4.731 | 0.570 | 0.606 |
| 3.520 | 3.730 | 4.111 | 3.438 | 3.510 | 0.402 | 0.606 |
| 2.454 | 2.457 | 2.920 | 2.337 | 2.209 | 0.395 | 0.606 |
| 5.376 | 4.931 | 5.732 | 5.576 | 5.306 | 0.367 | 0.606 |
| 2.221 | 2.482 | 2.921 | 2.551 | 2.441 | 0.518 | 0.606 |
| 5.869 | 4.402 | 4.049 | 4.760 | 5.257 | 0.450 | 0.606 |
| 3.632 | 2.664 | 3.043 | 2.719 | 2.802 | 0.355 | 0.606 |
| 5.853 | 7.288 | 3.911 | 7.376 | 7.116 | 0.749 | 0.606 |
| 3.514 | 3.329 | 4.452 | 1.917 | 2.207 | 0.786 | 0.606 |
| 3.563 | 3.251 | 3.727 | 2.719 | 3.467 | 0.479 | 0.606 |
| 8.674 | 8.865 | 8.018 | 8.909 | 9.172 | 0.396 | 0.606 |
| 5.881 | 4.366 | 5.556 | 4.031 | 4.244 | 0.510 | 0.606 |
| 4.674 | 4.775 | 4.572 | 5.378 | 5.508 | 0.332 | 0.606 |
| 2.838 | 3.607 | 3.299 | 3.045 | 2.967 | 0.380 | 0.606 |
| 2.818 | 3.498 | 3.102 | 3.935 | 3.951 | 0.418 | 0.606 |
| 2.738 | 2.633 | 3.500 | 2.401 | 2.909 | 0.557 | 0.606 |
| 1.684 | 3.517 | 1.976 | 3.680 | 2.260 | 0.546 | 0.606 |
| 3.732 | 4.039 | 3.645 | 3.658 | 4.281 | 0.501 | 0.606 |
| 6.732 | 5.700 | 7.329 | 4.971 | 5.527 | 0.517 | 0.606 |
| 4.202 | 4.153 | 3.470 | 3.225 | 3.611 | 0.396 | 0.606 |
| 5.502 | 5.887 | 5.847 | 5.417 | 5.895 | 0.409 | 0.606 |
| 3.424 | 3.409 | 2.472 | 3.897 | 3.994 | 0.500 | 0.606 |
| 6.620 | 6.529 | 4.607 | 6.668 | 6.522 | 0.493 | 0.606 |
| 7.706 | 7.348 | 8.709 | 6.117 | 6.382 | 0.553 | 0.606 |
| 3.339 | 3.674 | 3.940 | 3.236 | 2.954 | 0.358 | 0.606 |
| 8.001 | 8.239 | 7.903 | 8.671 | 8.787 | 0.318 | 0.606 |
| 5.765 | 5.907 | 6.120 | 5.325 | 5.618 | 0.442 | 0.606 |
| 5.453 | 5.941 | 6.263 | 5.178 | 5.385 | 0.397 | 0.606 |
| 7.133 | 6.174 | 7.137 | 5.564 | 6.551 | 0.485 | 0.606 |
| 5.742 | 5.768 | 3.567 | 5.624 | 5.774 | 0.577 | 0.606 |
| 6.090 | 6.912 | 3.990 | 6.838 | 7.072 | 0.821 | 0.606 |
| 3.834 | 2.866 | 3.705 | 2.748 | 2.776 | 0.438 | 0.606 |
| 4.056 | 4.436 | 4.721 | 4.555 | 4.440 | 0.411 | 0.606 |
| 7.563 | 8.039 | 7.895 | 8.371 | 8.437 | 0.357 | 0.606 |
| 4.656 | 4.084 | 2.808 | 4.546 | 4.862 | 0.452 | 0.606 |
| 5.402 | 3.306 | 1.829 | 3.853 | 4.035 | 0.721 | 0.606 |
| 7.066 | 6.712 | 6.965 | 6.298 | 6.650 | 0.326 | 0.606 |
| 4.697 | 5.565 | 4.572 | 5.735 | 4.957 | 0.412 | 0.606 |
| 4.646 | 4.613 | 4.037 | 4.348 | 4.527 | 0.444 | 0.606 |

|       |       |       |       |       |       |       |
|-------|-------|-------|-------|-------|-------|-------|
| 5.684 | 4.881 | 5.908 | 4.497 | 4.256 | 0.452 | 0.606 |
| 3.943 | 4.468 | 3.810 | 4.491 | 4.385 | 0.343 | 0.606 |
| 4.465 | 5.541 | 5.306 | 4.648 | 4.219 | 0.461 | 0.606 |
| 4.846 | 6.492 | 2.207 | 6.344 | 6.597 | 0.935 | 0.606 |
| 5.324 | 5.315 | 5.824 | 5.546 | 5.933 | 0.429 | 0.606 |
| 2.688 | 3.866 | 2.989 | 4.423 | 4.064 | 0.561 | 0.606 |
| 8.285 | 7.634 | 9.618 | 7.460 | 8.108 | 0.520 | 0.606 |
| 3.172 | 3.044 | 3.963 | 3.487 | 3.439 | 0.389 | 0.606 |
| 4.638 | 4.427 | 4.534 | 4.317 | 4.446 | 0.382 | 0.606 |
| 5.968 | 5.620 | 6.524 | 5.400 | 5.368 | 0.418 | 0.606 |
| 4.793 | 4.950 | 4.190 | 5.518 | 5.361 | 0.437 | 0.606 |
| 7.949 | 7.373 | 9.206 | 7.515 | 7.639 | 0.534 | 0.606 |
| 3.820 | 3.159 | 3.650 | 3.250 | 3.389 | 0.445 | 0.606 |
| 3.919 | 3.981 | 4.315 | 4.043 | 3.340 | 0.397 | 0.606 |
| 3.488 | 3.930 | 3.504 | 3.795 | 3.596 | 0.348 | 0.606 |
| 8.542 | 8.813 | 8.498 | 9.085 | 9.106 | 0.307 | 0.606 |
| 7.541 | 7.810 | 7.485 | 8.081 | 8.091 | 0.311 | 0.606 |
| 7.213 | 7.455 | 7.165 | 7.728 | 7.767 | 0.310 | 0.606 |
| 2.488 | 5.103 | 2.492 | 4.312 | 4.782 | 0.749 | 0.606 |
| 5.914 | 7.502 | 6.991 | 4.198 | 3.280 | 0.892 | 0.606 |
| 3.873 | 3.368 | 4.138 | 2.718 | 3.093 | 0.605 | 0.606 |
| 5.578 | 5.350 | 6.114 | 4.935 | 5.039 | 0.430 | 0.606 |
| 2.942 | 4.255 | 3.016 | 4.279 | 3.715 | 0.449 | 0.606 |
| 3.423 | 4.820 | 4.386 | 3.967 | 4.010 | 0.780 | 0.606 |
| 4.415 | 4.581 | 3.533 | 4.637 | 5.028 | 0.431 | 0.606 |
| 4.749 | 5.356 | 5.255 | 4.401 | 4.823 | 0.522 | 0.606 |
| 6.600 | 6.458 | 5.902 | 6.163 | 6.340 | 0.588 | 0.606 |
| 2.522 | 3.516 | 3.454 | 3.108 | 3.485 | 0.369 | 0.606 |
| 2.581 | 1.146 | 1.058 | 1.733 | 1.795 | 0.396 | 0.606 |
| 5.193 | 7.863 | 2.872 | 8.020 | 8.218 | 1.143 | 0.606 |
| 5.326 | 5.215 | 3.134 | 5.842 | 5.369 | 0.594 | 0.606 |
| 6.100 | 7.126 | 4.358 | 7.450 | 7.302 | 0.809 | 0.606 |
| 6.952 | 8.161 | 3.784 | 8.593 | 8.495 | 1.039 | 0.606 |
| 4.730 | 4.526 | 2.537 | 5.297 | 4.542 | 0.672 | 0.606 |
| 4.816 | 4.385 | 5.888 | 4.016 | 4.075 | 0.521 | 0.606 |
| 7.251 | 7.118 | 6.034 | 7.516 | 7.273 | 0.372 | 0.606 |
| 2.659 | 2.857 | 3.529 | 2.605 | 3.018 | 0.406 | 0.606 |
| 5.247 | 5.222 | 6.260 | 4.666 | 4.880 | 0.536 | 0.606 |
| 3.433 | 3.996 | 2.889 | 4.657 | 3.816 | 0.494 | 0.606 |
| 5.081 | 4.165 | 5.669 | 2.449 | 3.239 | 0.730 | 0.606 |
| 4.142 | 4.517 | 3.989 | 5.143 | 4.517 | 0.458 | 0.606 |
| 1.856 | 2.556 | 1.918 | 2.844 | 2.966 | 0.357 | 0.606 |
| 1.652 | 2.877 | 1.353 | 2.905 | 3.375 | 0.521 | 0.606 |
| 8.996 | 9.029 | 9.363 | 8.475 | 8.324 | 0.384 | 0.606 |
| 4.923 | 6.272 | 4.497 | 6.727 | 6.473 | 0.544 | 0.606 |
| 3.989 | 4.095 | 3.035 | 4.485 | 4.172 | 0.428 | 0.606 |
| 3.298 | 2.571 | 4.052 | 1.787 | 1.977 | 0.601 | 0.606 |
| 4.490 | 5.576 | 5.093 | 5.389 | 5.865 | 0.461 | 0.606 |
| 7.685 | 7.854 | 7.761 | 8.253 | 8.045 | 0.303 | 0.606 |
| 5.720 | 5.163 | 6.138 | 4.406 | 4.709 | 0.431 | 0.606 |

|        |        |        |        |        |       |       |
|--------|--------|--------|--------|--------|-------|-------|
| 4.734  | 5.107  | 3.873  | 4.678  | 4.434  | 0.577 | 0.606 |
| 2.564  | 2.718  | 2.042  | 1.981  | 1.941  | 0.495 | 0.606 |
| 2.486  | 3.321  | 1.892  | 2.794  | 3.175  | 0.545 | 0.606 |
| 3.743  | 3.481  | 3.074  | 4.225  | 4.391  | 0.453 | 0.606 |
| 5.394  | 6.222  | 3.629  | 6.533  | 6.305  | 0.625 | 0.606 |
| 2.860  | 2.715  | 1.951  | 3.166  | 2.967  | 0.493 | 0.606 |
| 2.412  | 2.974  | 3.732  | 3.246  | 2.985  | 0.481 | 0.606 |
| 6.094  | 6.342  | 3.701  | 6.765  | 6.527  | 0.728 | 0.606 |
| 6.114  | 7.082  | 4.198  | 7.230  | 7.252  | 0.708 | 0.606 |
| 5.964  | 7.092  | 3.882  | 7.430  | 7.316  | 0.755 | 0.606 |
| 5.449  | 8.124  | 3.929  | 8.400  | 8.358  | 0.966 | 0.606 |
| 3.782  | 5.476  | 2.702  | 5.806  | 5.296  | 0.682 | 0.606 |
| 2.649  | 2.824  | 1.953  | 3.156  | 3.071  | 0.443 | 0.606 |
| 2.840  | 3.210  | 3.436  | 1.946  | 2.376  | 0.552 | 0.606 |
| 4.686  | 4.722  | 5.037  | 5.021  | 5.122  | 0.334 | 0.606 |
| 5.091  | 4.789  | 5.613  | 5.223  | 5.330  | 0.363 | 0.606 |
| 3.298  | 3.242  | 3.107  | 3.685  | 3.630  | 0.410 | 0.606 |
| 4.969  | 4.980  | 2.417  | 5.515  | 5.752  | 0.635 | 0.606 |
| 5.177  | 5.700  | 4.252  | 5.510  | 5.482  | 0.483 | 0.606 |
| 2.403  | 3.639  | 2.375  | 2.877  | 2.297  | 0.589 | 0.606 |
| 6.892  | 6.984  | 7.135  | 7.596  | 7.199  | 0.354 | 0.606 |
| 7.462  | 7.551  | 7.124  | 7.757  | 7.836  | 0.341 | 0.606 |
| 2.665  | 3.125  | 3.282  | 2.982  | 2.600  | 0.434 | 0.606 |
| 4.684  | 4.703  | 4.943  | 4.049  | 4.437  | 0.379 | 0.606 |
| 5.504  | 5.435  | 4.998  | 5.792  | 5.888  | 0.349 | 0.606 |
| 6.263  | 7.207  | 7.290  | 6.979  | 7.019  | 0.346 | 0.606 |
| 10.766 | 10.818 | 10.573 | 10.435 | 10.407 | 0.284 | 0.606 |
| 5.946  | 4.131  | 3.626  | 4.546  | 4.534  | 0.520 | 0.606 |
| 11.225 | 10.473 | 11.189 | 11.545 | 10.808 | 0.383 | 0.606 |
| 4.747  | 3.871  | 4.255  | 4.022  | 3.015  | 0.599 | 0.606 |
| 0.974  | 1.499  | 1.570  | 1.993  | 4.255  | 0.668 | 0.606 |
| 5.544  | 6.051  | 6.426  | 5.786  | 5.891  | 0.446 | 0.606 |
| 2.581  | 2.255  | 2.614  | 2.884  | 1.800  | 0.397 | 0.606 |
| 4.483  | 1.707  | 3.721  | 2.193  | 1.582  | 0.810 | 0.606 |
| 4.242  | 3.952  | 4.800  | 3.229  | 2.676  | 0.506 | 0.606 |
| 3.339  | 1.597  | 4.355  | 2.433  | 3.085  | 0.707 | 0.606 |
| 2.596  | 2.569  | 3.098  | 2.548  | 2.649  | 0.448 | 0.606 |
| 2.496  | 2.703  | 2.788  | 2.590  | 2.510  | 0.413 | 0.606 |
| 5.147  | 5.647  | 5.868  | 5.094  | 5.188  | 0.465 | 0.606 |
| 2.510  | 2.435  | 2.594  | 2.794  | 2.510  | 0.403 | 0.606 |
| 3.769  | 1.672  | 2.876  | 2.967  | 1.808  | 0.938 | 0.606 |
| 4.032  | 3.566  | 4.299  | 4.508  | 4.327  | 0.490 | 0.606 |
| 1.855  | 1.433  | 2.479  | 1.753  | 2.708  | 0.408 | 0.606 |
| 2.288  | 2.809  | 2.148  | 3.111  | 2.890  | 0.472 | 0.606 |
| 3.639  | 2.778  | 3.341  | 1.714  | 2.702  | 0.563 | 0.606 |
| 4.977  | 3.343  | 6.252  | 1.991  | 2.161  | 0.975 | 0.606 |
| 4.477  | 3.175  | 2.488  | 4.539  | 4.416  | 0.681 | 0.606 |
| 5.648  | 5.855  | 6.346  | 5.874  | 5.759  | 0.396 | 0.606 |
| 5.482  | 3.541  | 6.212  | 2.694  | 4.212  | 0.845 | 0.606 |
| 3.130  | 2.920  | 3.456  | 2.719  | 2.275  | 0.442 | 0.606 |

|       |        |       |       |       |       |       |
|-------|--------|-------|-------|-------|-------|-------|
| 1.592 | 3.820  | 3.001 | 3.234 | 2.319 | 0.644 | 0.606 |
| 4.160 | 3.866  | 4.483 | 4.043 | 4.810 | 0.451 | 0.606 |
| 2.924 | 2.725  | 2.446 | 3.077 | 3.404 | 0.572 | 0.606 |
| 4.115 | 3.665  | 4.930 | 4.381 | 4.663 | 0.486 | 0.606 |
| 0.804 | 3.715  | 3.271 | 2.105 | 0.899 | 0.770 | 0.606 |
| 3.416 | 3.617  | 2.810 | 2.374 | 3.312 | 0.733 | 0.606 |
| 2.242 | 3.551  | 2.118 | 2.864 | 2.319 | 0.552 | 0.606 |
| 3.261 | 3.195  | 3.370 | 3.172 | 2.584 | 0.587 | 0.606 |
| 3.174 | 4.352  | 2.860 | 4.854 | 4.714 | 0.644 | 0.606 |
| 2.902 | 4.955  | 3.196 | 4.103 | 2.538 | 0.699 | 0.606 |
| 2.349 | 3.117  | 3.374 | 3.005 | 2.030 | 0.571 | 0.606 |
| 2.765 | 2.605  | 2.640 | 2.994 | 3.006 | 0.508 | 0.606 |
| 3.415 | 2.519  | 3.096 | 2.135 | 2.929 | 0.569 | 0.606 |
| 5.699 | 5.676  | 5.939 | 5.356 | 5.660 | 0.349 | 0.606 |
| 0.532 | 3.449  | 1.899 | 1.989 | 1.852 | 0.616 | 0.606 |
| 2.036 | 2.385  | 2.245 | 2.708 | 2.452 | 0.658 | 0.606 |
| 5.082 | 4.641  | 5.691 | 4.719 | 5.464 | 0.574 | 0.606 |
| 2.814 | 2.557  | 2.778 | 2.842 | 2.619 | 0.778 | 0.606 |
| 3.705 | 3.825  | 2.165 | 4.268 | 3.889 | 0.593 | 0.606 |
| 3.758 | 3.486  | 4.231 | 4.102 | 3.790 | 0.400 | 0.606 |
| 3.233 | 2.630  | 3.358 | 3.154 | 2.358 | 0.341 | 0.606 |
| 1.385 | 1.959  | 1.750 | 2.210 | 1.579 | 0.605 | 0.606 |
| 2.168 | 2.106  | 1.424 | 3.190 | 3.180 | 0.608 | 0.606 |
| 2.848 | 3.305  | 3.102 | 2.921 | 2.791 | 0.485 | 0.606 |
| 4.211 | 5.571  | 4.980 | 5.111 | 4.375 | 0.670 | 0.606 |
| 2.065 | 2.035  | 2.675 | 2.348 | 2.256 | 0.430 | 0.606 |
| 2.001 | 3.858  | 3.246 | 5.717 | 5.433 | 0.969 | 0.606 |
| 4.576 | 3.892  | 5.325 | 3.787 | 3.922 | 0.530 | 0.606 |
| 8.985 | 10.061 | 9.822 | 9.146 | 9.299 | 0.423 | 0.606 |
| 8.505 | 9.295  | 9.083 | 8.454 | 8.608 | 0.410 | 0.606 |
| 1.426 | 2.198  | 1.323 | 3.001 | 2.366 | 0.558 | 0.606 |
| 2.142 | 2.053  | 1.672 | 2.534 | 2.257 | 0.443 | 0.606 |
| 4.772 | 2.499  | 3.890 | 3.891 | 3.308 | 0.665 | 0.606 |
| 1.595 | 2.553  | 2.787 | 1.391 | 2.132 | 0.584 | 0.606 |
| 4.797 | 3.584  | 5.031 | 3.469 | 3.294 | 0.604 | 0.606 |
| 2.102 | 2.745  | 2.883 | 3.001 | 2.378 | 0.439 | 0.606 |
| 2.740 | 2.331  | 2.224 | 2.530 | 3.323 | 0.467 | 0.606 |
| 3.310 | 2.610  | 3.784 | 2.582 | 3.084 | 0.611 | 0.606 |
| 3.727 | 2.731  | 3.588 | 3.636 | 2.743 | 0.512 | 0.606 |
| 2.993 | 2.015  | 2.174 | 3.326 | 3.336 | 0.536 | 0.606 |
| 5.112 | 2.973  | 5.689 | 3.869 | 3.383 | 0.794 | 0.606 |
| 2.909 | 1.562  | 1.564 | 2.526 | 2.370 | 0.464 | 0.606 |
| 3.001 | 2.484  | 3.261 | 2.726 | 2.781 | 0.547 | 0.606 |
| 2.757 | 1.877  | 3.885 | 2.903 | 2.739 | 0.823 | 0.606 |
| 2.365 | 2.783  | 1.389 | 3.620 | 4.079 | 0.758 | 0.606 |
| 4.925 | 4.228  | 4.633 | 4.190 | 4.244 | 0.463 | 0.606 |
| 2.415 | 1.825  | 2.232 | 2.926 | 1.607 | 0.565 | 0.606 |
| 1.859 | 2.959  | 1.239 | 2.971 | 2.689 | 0.643 | 0.606 |
| 2.720 | 2.044  | 2.582 | 2.565 | 2.047 | 0.598 | 0.606 |
| 3.474 | 3.239  | 4.446 | 2.578 | 3.130 | 0.520 | 0.606 |

|       |       |       |       |       |       |       |
|-------|-------|-------|-------|-------|-------|-------|
| 4.250 | 2.331 | 3.181 | 2.998 | 2.505 | 0.468 | 0.606 |
| 2.760 | 3.953 | 1.830 | 3.477 | 3.087 | 0.621 | 0.606 |
| 3.439 | 2.722 | 3.461 | 2.495 | 2.845 | 0.432 | 0.606 |
| 3.754 | 1.639 | 2.436 | 1.368 | 2.319 | 0.644 | 0.606 |
| 3.281 | 2.814 | 4.678 | 3.308 | 2.531 | 0.557 | 0.606 |
| 3.127 | 1.852 | 4.530 | 2.598 | 3.346 | 0.630 | 0.606 |
| 3.875 | 4.867 | 5.029 | 4.198 | 4.252 | 0.513 | 0.606 |
| 4.996 | 4.238 | 4.794 | 4.106 | 4.257 | 0.530 | 0.606 |
| 2.951 | 3.371 | 3.438 | 3.660 | 2.974 | 0.585 | 0.606 |
| 1.805 | 2.150 | 3.019 | 2.933 | 2.595 | 0.533 | 0.606 |
| 1.529 | 1.499 | 2.300 | 1.643 | 2.152 | 0.631 | 0.606 |
| 2.394 | 3.539 | 3.250 | 3.466 | 4.470 | 0.624 | 0.606 |
| 1.501 | 3.951 | 2.355 | 3.960 | 2.460 | 0.661 | 0.606 |
| 4.071 | 3.329 | 4.299 | 3.620 | 3.329 | 0.555 | 0.606 |
| 2.321 | 2.944 | 2.376 | 3.365 | 1.195 | 0.583 | 0.606 |
| 5.045 | 4.869 | 4.402 | 4.492 | 4.695 | 0.463 | 0.606 |
| 3.652 | 3.905 | 4.020 | 3.748 | 2.921 | 0.490 | 0.606 |
| 3.661 | 3.224 | 3.285 | 4.485 | 4.148 | 0.713 | 0.606 |
| 1.958 | 2.039 | 2.263 | 1.978 | 3.093 | 0.499 | 0.606 |
| 3.660 | 1.785 | 3.302 | 1.851 | 1.900 | 0.643 | 0.606 |
| 2.165 | 2.284 | 2.739 | 2.737 | 1.603 | 0.435 | 0.606 |
| 4.150 | 3.992 | 4.313 | 4.266 | 3.847 | 0.409 | 0.606 |
| 4.206 | 3.728 | 4.212 | 2.845 | 4.117 | 0.613 | 0.606 |
| 2.321 | 2.335 | 2.050 | 2.515 | 2.515 | 0.485 | 0.606 |
| 2.483 | 3.432 | 2.944 | 2.946 | 2.433 | 0.458 | 0.606 |
| 2.447 | 3.129 | 3.630 | 4.051 | 2.513 | 0.493 | 0.606 |
| 2.465 | 1.786 | 1.905 | 2.945 | 1.413 | 0.519 | 0.606 |
| 1.966 | 2.100 | 2.258 | 3.250 | 2.820 | 0.551 | 0.606 |
| 2.331 | 3.059 | 2.704 | 2.810 | 3.326 | 0.501 | 0.606 |
| 4.945 | 4.620 | 3.869 | 5.482 | 5.388 | 0.441 | 0.606 |
| 2.211 | 2.205 | 1.765 | 3.495 | 3.164 | 0.777 | 0.606 |
| 4.540 | 3.819 | 3.818 | 3.104 | 3.413 | 0.515 | 0.606 |
| 2.823 | 1.739 | 2.714 | 2.090 | 1.971 | 0.483 | 0.606 |
| 2.333 | 2.917 | 2.442 | 2.300 | 2.309 | 0.572 | 0.606 |
| 2.891 | 3.049 | 2.658 | 2.153 | 2.234 | 0.617 | 0.606 |
| 4.748 | 6.712 | 6.011 | 5.592 | 5.963 | 0.687 | 0.606 |
| 3.484 | 2.430 | 3.199 | 3.088 | 3.351 | 0.418 | 0.606 |
| 2.649 | 5.168 | 4.455 | 4.641 | 4.477 | 0.597 | 0.606 |
| 6.234 | 5.870 | 6.776 | 4.174 | 5.250 | 0.535 | 0.606 |
| 4.934 | 6.337 | 6.897 | 3.207 | 4.836 | 1.324 | 0.606 |
| 2.821 | 3.160 | 3.492 | 2.241 | 3.722 | 1.123 | 0.606 |
| 5.643 | 6.011 | 5.686 | 3.541 | 5.116 | 0.766 | 0.606 |
| 4.351 | 4.335 | 4.294 | 3.860 | 4.577 | 0.417 | 0.606 |
| 5.424 | 5.265 | 6.002 | 4.571 | 4.756 | 0.466 | 0.606 |
| 4.650 | 5.554 | 3.803 | 6.111 | 5.904 | 0.715 | 0.606 |
| 8.848 | 6.868 | 6.891 | 6.726 | 7.030 | 0.533 | 0.606 |
| 3.083 | 3.411 | 2.792 | 3.847 | 3.867 | 0.481 | 0.606 |
| 8.450 | 8.782 | 8.119 | 9.186 | 8.750 | 0.305 | 0.606 |
| 6.257 | 6.632 | 6.257 | 7.065 | 6.669 | 0.331 | 0.606 |
| 4.147 | 4.583 | 3.034 | 4.782 | 4.673 | 0.455 | 0.606 |

|       |       |       |       |       |       |       |
|-------|-------|-------|-------|-------|-------|-------|
| 2.534 | 2.035 | 2.047 | 1.969 | 1.959 | 0.412 | 0.606 |
| 3.574 | 3.371 | 3.977 | 3.577 | 3.053 | 0.615 | 0.606 |
| 4.568 | 3.734 | 6.203 | 2.442 | 3.334 | 0.780 | 0.606 |
| 4.139 | 5.116 | 5.057 | 4.906 | 5.116 | 0.475 | 0.606 |
| 3.371 | 3.173 | 2.223 | 3.107 | 3.581 | 0.442 | 0.606 |
| 8.473 | 7.438 | 8.591 | 7.324 | 7.413 | 0.403 | 0.606 |
| 7.367 | 6.820 | 8.087 | 6.145 | 6.283 | 0.417 | 0.606 |
| 3.319 | 2.199 | 4.072 | 2.623 | 3.549 | 0.557 | 0.606 |
| 2.998 | 3.520 | 3.650 | 3.020 | 3.711 | 0.421 | 0.606 |
| 6.331 | 5.966 | 7.142 | 5.629 | 5.684 | 0.410 | 0.606 |
| 2.598 | 4.309 | 2.108 | 5.194 | 4.782 | 0.714 | 0.606 |
| 4.714 | 5.329 | 4.550 | 4.601 | 5.201 | 0.529 | 0.606 |
| 5.758 | 6.385 | 5.686 | 6.576 | 6.649 | 0.325 | 0.606 |
| 5.078 | 5.191 | 5.655 | 5.471 | 5.130 | 0.512 | 0.606 |
| 4.485 | 5.019 | 4.027 | 5.419 | 4.947 | 0.396 | 0.606 |
| 7.718 | 7.812 | 6.307 | 7.991 | 8.084 | 0.459 | 0.606 |
| 4.307 | 5.453 | 2.065 | 5.561 | 5.392 | 0.744 | 0.606 |
| 4.875 | 5.729 | 2.694 | 6.224 | 5.678 | 0.782 | 0.606 |
| 4.570 | 4.284 | 3.658 | 4.865 | 4.864 | 0.417 | 0.606 |
| 1.909 | 2.831 | 1.871 | 2.411 | 3.289 | 0.578 | 0.606 |
| 6.321 | 6.626 | 6.254 | 6.905 | 6.690 | 0.338 | 0.606 |
| 5.513 | 5.884 | 5.169 | 6.243 | 5.924 | 0.367 | 0.606 |
| 3.195 | 3.379 | 2.262 | 3.222 | 3.149 | 0.406 | 0.606 |
| 6.941 | 5.938 | 7.018 | 5.333 | 5.689 | 0.449 | 0.606 |
| 4.234 | 2.617 | 3.845 | 4.127 | 3.320 | 0.489 | 0.606 |
| 5.531 | 6.016 | 5.214 | 6.534 | 6.446 | 0.405 | 0.606 |
| 5.424 | 4.312 | 4.517 | 4.650 | 4.052 | 0.575 | 0.606 |
| 4.824 | 3.937 | 4.484 | 4.866 | 4.518 | 0.558 | 0.606 |
| 6.114 | 5.202 | 6.924 | 5.672 | 4.440 | 0.511 | 0.606 |
| 2.970 | 2.199 | 3.816 | 2.172 | 3.243 | 0.445 | 0.606 |
| 6.957 | 7.379 | 6.315 | 7.479 | 7.269 | 0.348 | 0.606 |
| 2.917 | 3.730 | 2.133 | 3.878 | 3.947 | 0.499 | 0.606 |
| 3.535 | 3.988 | 3.782 | 3.273 | 3.473 | 0.465 | 0.606 |
| 6.096 | 7.111 | 6.307 | 7.554 | 7.383 | 0.373 | 0.606 |
| 5.254 | 4.875 | 4.398 | 5.419 | 5.016 | 0.340 | 0.606 |
| 6.119 | 6.558 | 5.319 | 6.560 | 6.692 | 0.414 | 0.606 |
| 5.828 | 5.760 | 5.949 | 6.351 | 6.150 | 0.319 | 0.606 |
| 6.376 | 6.256 | 6.911 | 5.295 | 5.650 | 0.390 | 0.606 |
| 5.998 | 6.325 | 5.282 | 6.303 | 6.624 | 0.404 | 0.606 |
| 4.349 | 4.887 | 4.295 | 5.029 | 4.990 | 0.354 | 0.606 |
| 7.363 | 6.832 | 7.226 | 7.507 | 7.591 | 0.394 | 0.606 |
| 4.410 | 4.185 | 5.007 | 3.874 | 4.021 | 0.361 | 0.606 |
| 2.972 | 5.164 | 3.981 | 3.987 | 3.516 | 0.706 | 0.606 |
| 4.454 | 5.282 | 3.678 | 5.671 | 5.253 | 0.773 | 0.606 |
| 9.837 | 7.931 | 9.463 | 8.951 | 7.884 | 0.652 | 0.606 |
| 2.643 | 3.000 | 4.735 | 2.524 | 2.275 | 0.764 | 0.606 |
| 1.284 | 2.278 | 1.862 | 1.614 | 3.293 | 0.708 | 0.606 |
| 1.941 | 2.573 | 2.315 | 1.563 | 2.550 | 0.538 | 0.606 |
| 2.233 | 2.095 | 2.878 | 2.102 | 2.273 | 0.397 | 0.606 |
| 5.327 | 5.087 | 6.261 | 5.524 | 4.799 | 0.445 | 0.606 |



|       |       |       |       |       |       |       |
|-------|-------|-------|-------|-------|-------|-------|
| 4.107 | 4.538 | 2.964 | 4.359 | 4.687 | 0.555 | 0.606 |
| 3.440 | 3.378 | 3.382 | 3.953 | 3.602 | 0.468 | 0.606 |
| 3.818 | 4.488 | 4.575 | 4.951 | 3.807 | 0.420 | 0.606 |
| 2.761 | 2.521 | 1.918 | 0.847 | 2.506 | 0.637 | 0.606 |
| 3.901 | 3.332 | 5.437 | 4.938 | 4.759 | 0.529 | 0.606 |
| 3.534 | 3.225 | 4.439 | 3.657 | 3.229 | 0.591 | 0.606 |
| 1.273 | 2.350 | 2.720 | 2.540 | 2.159 | 0.394 | 0.606 |
| 3.988 | 3.526 | 4.587 | 4.466 | 4.470 | 0.504 | 0.606 |
| 3.679 | 2.511 | 3.690 | 2.638 | 3.224 | 0.465 | 0.606 |
| 4.732 | 4.576 | 4.760 | 4.394 | 4.174 | 0.424 | 0.606 |
| 6.306 | 5.080 | 5.144 | 5.992 | 5.471 | 0.491 | 0.606 |
| 2.151 | 3.026 | 2.981 | 4.013 | 4.546 | 0.532 | 0.606 |
| 4.015 | 4.159 | 1.759 | 4.556 | 3.633 | 0.715 | 0.606 |
| 7.079 | 6.877 | 7.311 | 6.330 | 6.719 | 0.521 | 0.606 |
| 5.354 | 4.921 | 3.586 | 5.056 | 5.238 | 0.986 | 0.606 |
| 3.648 | 2.909 | 3.203 | 3.272 | 2.788 | 0.475 | 0.606 |
| 3.373 | 3.305 | 3.280 | 1.812 | 1.593 | 0.602 | 0.606 |
| 2.502 | 2.170 | 3.172 | 2.527 | 2.482 | 0.459 | 0.606 |
| 1.988 | 0.828 | 1.990 | 1.186 | 0.674 | 0.648 | 0.606 |
| 3.645 | 3.345 | 4.684 | 3.271 | 3.098 | 0.420 | 0.606 |
| 1.404 | 3.315 | 2.257 | 2.538 | 2.402 | 0.484 | 0.606 |
| 2.895 | 3.228 | 3.519 | 2.450 | 3.044 | 0.659 | 0.606 |
| 1.728 | 2.683 | 2.683 | 3.492 | 2.614 | 0.472 | 0.606 |
| 2.864 | 1.458 | 2.168 | 1.798 | 1.248 | 0.634 | 0.606 |
| 7.636 | 7.142 | 8.107 | 7.319 | 6.524 | 0.500 | 0.606 |
| 5.042 | 3.788 | 4.667 | 4.831 | 4.214 | 0.469 | 0.606 |
| 4.244 | 3.854 | 4.455 | 4.886 | 4.061 | 0.418 | 0.606 |
| 4.154 | 3.751 | 4.568 | 3.154 | 4.008 | 0.556 | 0.606 |
| 3.180 | 2.308 | 3.004 | 2.911 | 3.096 | 0.466 | 0.606 |
| 3.503 | 1.934 | 3.611 | 2.790 | 2.974 | 0.572 | 0.606 |
| 3.824 | 2.864 | 3.734 | 2.298 | 2.478 | 0.522 | 0.606 |
| 4.896 | 4.809 | 5.248 | 4.378 | 3.697 | 0.529 | 0.606 |
| 3.576 | 2.547 | 3.571 | 3.381 | 2.241 | 0.470 | 0.606 |
| 2.093 | 1.965 | 2.899 | 2.564 | 2.369 | 0.542 | 0.606 |
| 4.662 | 3.145 | 4.985 | 3.455 | 2.172 | 0.679 | 0.606 |
| 6.228 | 5.146 | 6.190 | 5.165 | 5.212 | 0.480 | 0.606 |
| 3.117 | 1.330 | 2.048 | 1.836 | 2.078 | 0.488 | 0.606 |
| 4.004 | 3.828 | 4.323 | 3.576 | 2.532 | 0.576 | 0.606 |
| 9.958 | 9.820 | 9.637 | 9.636 | 9.235 | 0.340 | 0.606 |
| 6.374 | 4.837 | 7.001 | 4.983 | 4.795 | 0.699 | 0.606 |
| 3.435 | 1.883 | 4.433 | 1.558 | 2.272 | 0.848 | 0.606 |
| 4.203 | 2.351 | 3.980 | 1.245 | 2.283 | 0.780 | 0.606 |
| 3.000 | 4.529 | 5.298 | 3.990 | 4.088 | 0.615 | 0.606 |
| 1.940 | 4.153 | 2.904 | 2.066 | 3.360 | 1.090 | 0.606 |
| 7.231 | 7.868 | 8.586 | 7.131 | 6.458 | 0.783 | 0.606 |
| 5.037 | 5.408 | 5.914 | 4.740 | 4.646 | 0.443 | 0.606 |
| 2.196 | 2.009 | 1.909 | 2.517 | 1.534 | 0.726 | 0.606 |
| 0.959 | 1.568 | 1.411 | 1.417 | 2.361 | 0.496 | 0.606 |
| 5.769 | 5.068 | 6.080 | 5.539 | 4.884 | 0.502 | 0.606 |
| 1.918 | 1.401 | 2.268 | 2.272 | 2.321 | 0.692 | 0.606 |

|       |       |       |       |       |       |       |
|-------|-------|-------|-------|-------|-------|-------|
| 2.787 | 1.582 | 2.939 | 0.604 | 2.181 | 0.716 | 0.606 |
| 6.281 | 4.257 | 7.180 | 3.347 | 2.237 | 1.217 | 0.606 |
| 6.125 | 4.310 | 5.807 | 4.380 | 4.209 | 0.619 | 0.606 |
| 4.298 | 5.022 | 5.019 | 4.607 | 4.604 | 0.364 | 0.606 |
| 3.730 | 3.086 | 2.032 | 1.830 | 0.901 | 0.782 | 0.606 |
| 4.264 | 1.600 | 2.671 | 2.541 | 3.138 | 0.772 | 0.606 |
| 3.916 | 2.920 | 4.245 | 3.006 | 1.527 | 0.676 | 0.606 |
| 5.523 | 2.830 | 4.964 | 4.036 | 4.718 | 0.605 | 0.606 |
| 2.597 | 2.678 | 2.757 | 2.700 | 3.333 | 0.516 | 0.606 |
| 3.904 | 4.296 | 4.172 | 3.991 | 4.226 | 0.426 | 0.606 |
| 2.838 | 2.734 | 2.474 | 3.345 | 2.019 | 0.472 | 0.606 |
| 2.901 | 3.256 | 2.768 | 3.804 | 2.620 | 0.444 | 0.606 |
| 2.266 | 2.305 | 2.724 | 3.124 | 2.514 | 0.492 | 0.606 |
| 3.059 | 3.239 | 3.905 | 2.609 | 2.524 | 0.627 | 0.606 |
| 4.680 | 4.226 | 5.039 | 4.998 | 4.932 | 0.615 | 0.606 |
| 2.135 | 1.802 | 2.017 | 1.705 | 2.246 | 0.440 | 0.606 |
| 3.138 | 3.562 | 3.987 | 3.214 | 2.694 | 0.589 | 0.606 |
| 2.981 | 2.551 | 1.995 | 3.199 | 2.485 | 0.502 | 0.606 |
| 4.934 | 5.102 | 5.429 | 4.541 | 4.978 | 0.572 | 0.606 |
| 3.635 | 2.750 | 4.405 | 2.240 | 1.274 | 0.746 | 0.606 |
| 1.902 | 1.451 | 2.196 | 1.414 | 1.926 | 0.481 | 0.606 |
| 4.334 | 3.445 | 4.612 | 2.078 | 3.314 | 0.710 | 0.606 |
| 5.015 | 2.397 | 3.388 | 3.828 | 2.618 | 0.774 | 0.606 |
| 7.114 | 6.360 | 7.652 | 6.759 | 6.225 | 0.406 | 0.606 |
| 3.375 | 3.879 | 3.815 | 3.385 | 2.680 | 0.438 | 0.606 |
| 4.743 | 3.999 | 4.347 | 3.483 | 4.023 | 0.494 | 0.606 |
| 3.969 | 2.794 | 3.101 | 2.765 | 3.312 | 0.707 | 0.606 |
| 2.400 | 2.094 | 3.064 | 1.936 | 2.236 | 0.715 | 0.606 |
| 1.841 | 1.664 | 2.564 | 1.010 | 1.585 | 0.478 | 0.606 |
| 3.874 | 1.764 | 4.654 | 3.645 | 2.836 | 0.698 | 0.606 |
| 2.900 | 2.222 | 2.285 | 2.755 | 3.038 | 0.568 | 0.606 |
| 4.739 | 2.790 | 3.957 | 3.044 | 3.797 | 0.707 | 0.606 |
| 3.336 | 2.494 | 3.724 | 1.162 | 2.519 | 0.646 | 0.606 |
| 2.671 | 2.679 | 2.409 | 3.137 | 2.800 | 0.464 | 0.606 |
| 1.877 | 3.094 | 2.927 | 1.821 | 2.582 | 0.600 | 0.606 |
| 4.365 | 3.706 | 3.849 | 3.404 | 3.854 | 0.502 | 0.606 |
| 4.215 | 3.410 | 4.241 | 3.350 | 3.471 | 0.496 | 0.606 |
| 4.306 | 4.220 | 2.786 | 4.979 | 4.884 | 0.572 | 0.606 |
| 3.960 | 3.680 | 2.588 | 4.625 | 4.361 | 0.527 | 0.606 |
| 3.957 | 3.875 | 2.665 | 4.690 | 4.644 | 0.534 | 0.606 |
| 3.907 | 2.376 | 3.702 | 1.919 | 2.901 | 0.826 | 0.606 |
| 3.235 | 2.531 | 4.076 | 2.323 | 2.016 | 0.558 | 0.606 |
| 3.384 | 3.294 | 3.373 | 2.843 | 3.251 | 0.578 | 0.606 |
| 3.750 | 3.204 | 3.700 | 3.558 | 3.659 | 0.538 | 0.606 |
| 1.821 | 3.690 | 2.520 | 4.707 | 3.030 | 0.735 | 0.606 |
| 3.141 | 2.693 | 2.417 | 2.697 | 2.714 | 0.429 | 0.606 |
| 3.830 | 4.275 | 3.404 | 4.046 | 3.680 | 0.420 | 0.606 |
| 3.178 | 2.434 | 3.479 | 2.382 | 1.811 | 0.584 | 0.606 |
| 3.152 | 2.363 | 4.128 | 2.008 | 2.635 | 0.590 | 0.606 |
| 3.422 | 3.233 | 3.385 | 3.039 | 3.067 | 0.416 | 0.606 |

|       |       |       |       |       |       |       |
|-------|-------|-------|-------|-------|-------|-------|
| 4.127 | 3.155 | 3.872 | 3.957 | 3.719 | 0.602 | 0.606 |
| 2.996 | 2.654 | 2.803 | 1.491 | 1.732 | 0.598 | 0.606 |
| 4.177 | 2.053 | 3.524 | 4.319 | 4.251 | 0.768 | 0.606 |
| 2.956 | 2.254 | 2.729 | 2.853 | 2.267 | 0.589 | 0.606 |
| 1.752 | 1.090 | 1.442 | 0.577 | 1.118 | 0.616 | 0.606 |
| 2.306 | 2.385 | 2.837 | 2.433 | 2.127 | 0.455 | 0.606 |
| 4.199 | 3.462 | 3.839 | 3.901 | 4.390 | 0.554 | 0.606 |
| 2.547 | 2.213 | 3.553 | 2.895 | 1.543 | 0.468 | 0.606 |
| 3.643 | 4.436 | 4.095 | 5.967 | 5.307 | 0.724 | 0.606 |
| 1.933 | 2.550 | 3.478 | 3.119 | 2.837 | 0.434 | 0.606 |
| 0.247 | 1.911 | 1.572 | 0.761 | 1.253 | 0.572 | 0.606 |
| 3.096 | 2.748 | 3.161 | 3.451 | 3.468 | 0.457 | 0.606 |
| 3.162 | 2.932 | 3.544 | 3.451 | 2.939 | 0.569 | 0.606 |
| 3.240 | 3.016 | 3.410 | 2.571 | 3.031 | 0.699 | 0.606 |
| 2.554 | 2.159 | 1.769 | 2.036 | 2.178 | 0.626 | 0.606 |
| 3.410 | 3.211 | 1.429 | 3.793 | 3.983 | 0.720 | 0.606 |
| 2.811 | 2.968 | 3.082 | 4.668 | 4.547 | 0.759 | 0.606 |
| 2.421 | 2.167 | 2.133 | 2.804 | 1.261 | 0.492 | 0.606 |
| 2.905 | 2.891 | 2.887 | 3.388 | 1.937 | 0.449 | 0.606 |
| 4.997 | 4.062 | 5.229 | 3.545 | 4.414 | 0.609 | 0.606 |
| 5.246 | 5.338 | 5.510 | 5.169 | 4.872 | 0.372 | 0.606 |
| 2.838 | 2.194 | 3.035 | 2.491 | 1.895 | 0.496 | 0.606 |
| 2.596 | 2.509 | 2.354 | 2.794 | 2.269 | 0.536 | 0.606 |
| 4.256 | 3.101 | 3.268 | 3.430 | 3.335 | 0.515 | 0.606 |
| 2.747 | 2.777 | 4.042 | 3.226 | 1.626 | 0.585 | 0.606 |
| 4.703 | 3.500 | 4.868 | 2.938 | 3.852 | 0.563 | 0.606 |
| 2.912 | 3.008 | 3.004 | 2.007 | 3.395 | 0.460 | 0.606 |
| 3.488 | 3.534 | 3.349 | 2.449 | 2.984 | 0.414 | 0.606 |
| 2.286 | 1.750 | 3.027 | 2.228 | 2.729 | 0.500 | 0.606 |
| 6.612 | 3.194 | 6.373 | 3.362 | 4.514 | 1.176 | 0.606 |
| 1.522 | 2.070 | 1.507 | 1.776 | 2.245 | 0.422 | 0.606 |
| 4.962 | 1.649 | 2.566 | 2.907 | 2.764 | 0.650 | 0.606 |
| 2.673 | 2.621 | 3.830 | 4.933 | 3.421 | 0.644 | 0.606 |
| 5.005 | 3.178 | 4.651 | 2.849 | 2.477 | 0.735 | 0.606 |
| 3.716 | 4.401 | 4.489 | 4.772 | 3.738 | 0.449 | 0.606 |
| 3.288 | 2.648 | 2.503 | 2.908 | 3.134 | 0.526 | 0.606 |
| 4.694 | 4.538 | 5.350 | 3.938 | 4.641 | 0.572 | 0.606 |
| 4.999 | 4.328 | 5.270 | 4.264 | 4.616 | 0.502 | 0.606 |
| 4.073 | 4.266 | 2.244 | 4.118 | 3.522 | 0.954 | 0.606 |
| 6.319 | 4.251 | 6.461 | 3.920 | 4.044 | 0.782 | 0.606 |
| 2.584 | 1.506 | 3.074 | 2.719 | 1.984 | 0.745 | 0.606 |
| 4.923 | 2.887 | 3.917 | 3.489 | 3.579 | 0.534 | 0.606 |
| 3.763 | 0.525 | 1.974 | 2.864 | 2.237 | 0.760 | 0.606 |
| 6.151 | 5.393 | 6.480 | 4.862 | 5.893 | 0.476 | 0.606 |
| 6.194 | 4.445 | 5.743 | 4.211 | 4.604 | 0.670 | 0.606 |
| 2.489 | 1.918 | 1.409 | 2.509 | 2.666 | 0.393 | 0.606 |
| 3.860 | 3.255 | 3.455 | 3.710 | 3.759 | 0.480 | 0.606 |
| 5.005 | 3.978 | 4.769 | 4.706 | 4.177 | 0.612 | 0.606 |
| 2.947 | 2.682 | 3.793 | 3.106 | 2.708 | 0.574 | 0.606 |
| 2.733 | 1.356 | 2.611 | 2.750 | 2.459 | 0.549 | 0.606 |

|       |       |       |       |       |       |       |
|-------|-------|-------|-------|-------|-------|-------|
| 4.915 | 4.661 | 5.784 | 5.633 | 4.728 | 0.510 | 0.606 |
| 3.197 | 2.322 | 3.003 | 2.161 | 2.224 | 0.485 | 0.606 |
| 3.444 | 2.164 | 3.288 | 3.368 | 2.538 | 0.584 | 0.606 |
| 3.882 | 3.039 | 3.628 | 4.058 | 3.204 | 0.587 | 0.606 |
| 4.759 | 3.926 | 5.413 | 4.067 | 3.343 | 0.504 | 0.606 |
| 3.345 | 2.725 | 2.168 | 2.851 | 2.725 | 0.553 | 0.606 |
| 2.125 | 1.649 | 2.126 | 1.919 | 1.869 | 0.616 | 0.606 |
| 2.984 | 3.836 | 4.054 | 3.049 | 3.132 | 0.502 | 0.606 |
| 3.086 | 2.053 | 3.849 | 3.629 | 3.032 | 0.506 | 0.606 |
| 3.416 | 3.315 | 3.703 | 1.894 | 2.154 | 0.744 | 0.606 |
| 3.551 | 1.905 | 3.390 | 1.789 | 3.187 | 0.785 | 0.606 |
| 3.189 | 2.626 | 3.415 | 3.529 | 2.744 | 0.445 | 0.606 |
| 1.927 | 3.193 | 3.027 | 2.292 | 1.710 | 0.571 | 0.606 |
| 3.277 | 2.365 | 2.519 | 1.913 | 3.019 | 0.655 | 0.606 |
| 3.184 | 1.637 | 3.161 | 2.584 | 2.571 | 0.626 | 0.606 |
| 5.787 | 4.850 | 6.196 | 5.861 | 5.288 | 0.529 | 0.606 |
| 2.155 | 1.765 | 2.300 | 2.281 | 2.252 | 0.587 | 0.606 |
| 3.437 | 4.007 | 3.658 | 4.171 | 4.013 | 0.421 | 0.606 |
| 5.238 | 4.695 | 3.521 | 6.506 | 6.061 | 0.715 | 0.606 |
| 2.325 | 1.678 | 2.471 | 1.739 | 2.398 | 0.544 | 0.606 |
| 3.216 | 2.992 | 4.206 | 3.767 | 3.246 | 0.405 | 0.606 |
| 1.643 | 1.987 | 2.845 | 1.928 | 2.956 | 0.572 | 0.606 |
| 5.132 | 4.689 | 5.544 | 4.161 | 3.378 | 0.552 | 0.606 |
| 3.865 | 2.132 | 2.291 | 2.544 | 2.531 | 0.794 | 0.606 |
| 4.899 | 5.504 | 3.926 | 5.653 | 5.051 | 0.673 | 0.606 |
| 4.476 | 2.382 | 3.602 | 2.908 | 3.055 | 0.767 | 0.606 |
| 4.792 | 4.383 | 4.576 | 3.514 | 4.658 | 0.473 | 0.606 |
| 2.808 | 2.669 | 2.748 | 2.719 | 2.510 | 0.645 | 0.606 |
| 5.008 | 3.171 | 3.949 | 4.406 | 3.307 | 0.580 | 0.606 |
| 5.745 | 4.180 | 5.654 | 4.373 | 4.993 | 0.507 | 0.606 |
| 3.822 | 4.031 | 3.506 | 3.385 | 3.395 | 0.604 | 0.606 |
| 3.093 | 2.193 | 2.862 | 3.841 | 1.450 | 0.618 | 0.606 |
| 1.514 | 2.064 | 0.495 | 2.633 | 3.282 | 0.796 | 0.606 |
| 3.097 | 2.821 | 2.695 | 1.833 | 2.108 | 0.590 | 0.606 |
| 2.537 | 2.419 | 1.966 | 4.171 | 3.402 | 0.832 | 0.606 |
| 4.016 | 2.934 | 3.300 | 3.138 | 3.210 | 0.521 | 0.606 |
| 2.664 | 1.848 | 1.521 | 3.169 | 1.934 | 0.479 | 0.606 |
| 5.515 | 4.710 | 5.598 | 2.626 | 2.880 | 0.794 | 0.606 |
| 3.125 | 3.863 | 4.325 | 4.678 | 4.107 | 0.506 | 0.606 |
| 2.982 | 2.365 | 2.287 | 2.655 | 2.339 | 0.460 | 0.606 |
| 3.105 | 3.165 | 3.713 | 2.276 | 2.015 | 0.577 | 0.606 |
| 3.431 | 3.407 | 3.639 | 3.605 | 2.510 | 0.446 | 0.606 |
| 2.766 | 1.681 | 2.110 | 2.192 | 2.224 | 0.520 | 0.606 |
| 2.959 | 3.781 | 2.937 | 3.832 | 2.805 | 0.563 | 0.606 |
| 4.286 | 2.858 | 4.886 | 2.899 | 2.556 | 0.836 | 0.606 |
| 1.380 | 2.071 | 2.962 | 3.829 | 3.522 | 0.779 | 0.606 |
| 5.134 | 3.700 | 5.223 | 4.750 | 3.827 | 0.553 | 0.606 |
| 1.582 | 1.212 | 1.613 | 2.706 | 1.977 | 0.489 | 0.606 |
| 3.381 | 1.896 | 3.873 | 0.464 | 1.296 | 0.874 | 0.606 |
| 4.455 | 2.208 | 4.423 | 3.308 | 3.110 | 0.875 | 0.606 |

|       |       |       |       |       |       |       |
|-------|-------|-------|-------|-------|-------|-------|
| 2.610 | 2.862 | 3.484 | 3.654 | 3.032 | 0.440 | 0.606 |
| 2.167 | 2.549 | 2.570 | 3.520 | 1.802 | 0.471 | 0.606 |
| 1.803 | 2.887 | 2.342 | 2.469 | 1.923 | 0.484 | 0.606 |
| 7.375 | 6.283 | 6.517 | 6.641 | 6.771 | 0.507 | 0.606 |
| 4.142 | 3.217 | 3.903 | 4.148 | 4.000 | 0.678 | 0.606 |
| 2.796 | 2.470 | 3.090 | 2.267 | 2.323 | 0.428 | 0.606 |
| 3.817 | 3.347 | 4.238 | 4.083 | 4.380 | 0.502 | 0.606 |
| 3.008 | 2.000 | 2.545 | 2.413 | 2.434 | 0.512 | 0.606 |
| 6.430 | 5.741 | 5.842 | 6.200 | 6.049 | 0.459 | 0.606 |
| 4.220 | 5.010 | 4.330 | 3.205 | 4.496 | 0.487 | 0.606 |
| 2.962 | 3.269 | 2.175 | 2.852 | 3.383 | 0.514 | 0.606 |
| 2.850 | 1.694 | 1.580 | 2.320 | 2.204 | 0.423 | 0.606 |
| 3.151 | 2.735 | 2.765 | 3.182 | 2.585 | 0.442 | 0.606 |
| 2.662 | 1.362 | 2.557 | 0.843 | 1.757 | 0.701 | 0.606 |
| 1.325 | 1.334 | 1.879 | 1.551 | 2.174 | 0.622 | 0.606 |
| 1.192 | 5.295 | 1.111 | 6.230 | 5.215 | 1.251 | 0.606 |
| 2.089 | 2.030 | 3.370 | 2.022 | 1.689 | 0.489 | 0.606 |
| 3.774 | 1.985 | 3.285 | 1.925 | 2.355 | 0.706 | 0.606 |
| 4.398 | 2.030 | 5.548 | 4.017 | 2.729 | 0.785 | 0.606 |
| 3.213 | 2.353 | 3.168 | 2.714 | 3.389 | 0.493 | 0.606 |
| 2.987 | 2.430 | 2.133 | 2.169 | 2.359 | 0.560 | 0.606 |
| 4.584 | 3.902 | 4.596 | 3.988 | 3.726 | 0.505 | 0.606 |
| 4.410 | 2.585 | 2.939 | 2.283 | 2.269 | 0.761 | 0.606 |
| 2.825 | 2.764 | 2.709 | 3.589 | 2.413 | 0.550 | 0.606 |
| 4.086 | 2.814 | 4.410 | 3.032 | 2.729 | 0.589 | 0.606 |
| 2.713 | 2.239 | 2.061 | 2.398 | 1.957 | 0.537 | 0.606 |
| 2.381 | 2.662 | 3.187 | 1.973 | 1.413 | 0.636 | 0.606 |
| 2.296 | 2.404 | 1.645 | 1.524 | 1.596 | 0.560 | 0.606 |
| 5.343 | 6.389 | 5.586 | 5.238 | 5.063 | 0.567 | 0.606 |
| 4.920 | 6.041 | 5.046 | 4.846 | 4.737 | 0.519 | 0.606 |
| 2.137 | 2.460 | 4.349 | 2.810 | 2.342 | 0.473 | 0.606 |
| 2.494 | 2.274 | 1.505 | 1.411 | 2.276 | 0.486 | 0.606 |
| 2.155 | 2.788 | 1.814 | 1.645 | 1.845 | 0.454 | 0.606 |
| 2.425 | 1.427 | 1.309 | 1.365 | 1.491 | 0.647 | 0.606 |
| 1.985 | 2.385 | 2.994 | 1.976 | 2.236 | 0.422 | 0.606 |
| 1.728 | 1.794 | 2.420 | 1.965 | 1.035 | 0.557 | 0.606 |
| 5.535 | 5.032 | 4.576 | 4.204 | 2.760 | 0.707 | 0.606 |
| 3.598 | 5.216 | 4.537 | 5.180 | 5.000 | 0.669 | 0.606 |
| 6.194 | 6.854 | 5.178 | 7.053 | 7.404 | 0.497 | 0.606 |
| 0.773 | 3.169 | 0.553 | 0.450 | 1.973 | 0.911 | 0.606 |
| 6.395 | 7.253 | 6.247 | 7.604 | 7.548 | 0.425 | 0.606 |
| 3.522 | 4.415 | 3.989 | 3.562 | 3.662 | 0.380 | 0.606 |
| 4.625 | 3.194 | 2.291 | 4.582 | 4.231 | 0.872 | 0.606 |
| 2.793 | 2.646 | 2.292 | 2.998 | 2.631 | 0.536 | 0.606 |
| 5.158 | 8.149 | 5.826 | 8.690 | 8.766 | 0.857 | 0.606 |
| 1.415 | 3.865 | 1.478 | 4.647 | 4.679 | 0.784 | 0.606 |
| 3.954 | 2.276 | 3.503 | 1.737 | 2.541 | 0.537 | 0.606 |
| 3.734 | 2.733 | 2.523 | 2.723 | 3.014 | 0.426 | 0.606 |
| 4.434 | 4.093 | 4.124 | 4.557 | 5.026 | 0.362 | 0.606 |
| 2.263 | 2.138 | 1.751 | 1.930 | 2.412 | 0.387 | 0.606 |

|       |       |       |       |       |       |       |
|-------|-------|-------|-------|-------|-------|-------|
| 2.999 | 3.788 | 3.742 | 4.610 | 3.974 | 0.536 | 0.606 |
| 3.924 | 4.431 | 4.552 | 3.872 | 3.709 | 0.449 | 0.606 |
| 4.655 | 2.968 | 4.520 | 2.544 | 3.000 | 0.548 | 0.606 |
| 3.828 | 2.628 | 3.386 | 3.813 | 4.078 | 0.574 | 0.606 |
| 2.359 | 2.918 | 3.737 | 1.658 | 1.953 | 0.439 | 0.606 |
| 2.538 | 2.659 | 2.170 | 3.845 | 2.505 | 0.503 | 0.606 |
| 4.757 | 4.109 | 5.313 | 3.887 | 3.866 | 0.455 | 0.606 |
| 4.388 | 4.265 | 5.830 | 4.432 | 4.281 | 0.522 | 0.606 |
| 4.059 | 3.840 | 5.039 | 3.872 | 3.886 | 0.424 | 0.606 |
| 3.075 | 2.965 | 4.041 | 2.422 | 3.462 | 0.520 | 0.606 |
| 3.433 | 3.087 | 4.897 | 2.787 | 4.000 | 0.599 | 0.606 |
| 3.160 | 3.361 | 5.399 | 3.899 | 3.173 | 0.679 | 0.606 |
| 1.555 | 2.232 | 1.509 | 1.029 | 1.389 | 0.835 | 0.606 |
| 7.166 | 5.367 | 8.220 | 3.168 | 4.069 | 1.020 | 0.606 |
| 6.254 | 5.360 | 6.221 | 3.655 | 4.647 | 0.750 | 0.606 |
| 2.268 | 1.879 | 2.176 | 1.986 | 2.432 | 0.392 | 0.606 |
| 5.469 | 2.436 | 3.591 | 2.547 | 2.748 | 0.806 | 0.606 |
| 4.241 | 3.049 | 3.538 | 3.780 | 3.405 | 0.609 | 0.606 |
| 2.846 | 1.822 | 2.908 | 3.501 | 2.709 | 0.443 | 0.606 |
| 1.866 | 1.873 | 2.818 | 2.402 | 1.556 | 0.687 | 0.606 |
| 4.299 | 3.831 | 4.938 | 3.409 | 3.148 | 0.461 | 0.606 |
| 4.296 | 3.476 | 2.194 | 4.409 | 4.373 | 0.612 | 0.606 |
| 3.788 | 2.577 | 3.102 | 1.889 | 2.013 | 0.524 | 0.606 |
| 3.200 | 4.661 | 4.052 | 3.530 | 4.098 | 0.539 | 0.606 |
| 2.625 | 2.377 | 2.422 | 3.020 | 2.934 | 0.472 | 0.606 |
| 2.897 | 2.582 | 3.856 | 2.417 | 2.746 | 0.456 | 0.606 |
| 2.937 | 3.239 | 4.269 | 2.495 | 2.457 | 0.474 | 0.606 |
| 3.090 | 3.318 | 3.428 | 3.145 | 2.966 | 0.419 | 0.606 |
| 2.982 | 2.388 | 2.458 | 2.859 | 2.292 | 0.442 | 0.606 |
| 2.232 | 2.259 | 3.260 | 2.564 | 1.868 | 0.547 | 0.606 |
| 2.470 | 2.068 | 2.968 | 1.824 | 1.903 | 0.538 | 0.606 |
| 3.313 | 2.966 | 4.601 | 3.885 | 3.408 | 0.792 | 0.606 |
| 3.437 | 3.024 | 3.178 | 2.913 | 2.747 | 0.408 | 0.606 |
| 6.266 | 6.225 | 5.912 | 6.766 | 6.829 | 0.395 | 0.606 |
| 2.591 | 1.879 | 2.253 | 2.110 | 2.332 | 0.636 | 0.606 |
| 3.240 | 3.575 | 1.000 | 4.804 | 4.139 | 0.829 | 0.606 |
| 3.869 | 1.234 | 3.216 | 2.567 | 2.266 | 0.601 | 0.606 |
| 7.807 | 7.924 | 8.001 | 6.438 | 7.279 | 0.429 | 0.606 |
| 3.576 | 2.583 | 3.920 | 3.093 | 2.123 | 0.542 | 0.606 |
| 1.714 | 2.031 | 1.565 | 3.510 | 3.049 | 0.473 | 0.606 |
| 2.228 | 3.141 | 2.323 | 3.048 | 3.630 | 0.444 | 0.606 |
| 2.748 | 4.565 | 5.043 | 3.996 | 4.675 | 0.682 | 0.606 |
| 2.562 | 2.041 | 2.719 | 2.144 | 1.872 | 0.383 | 0.606 |
| 3.184 | 3.775 | 3.747 | 3.195 | 3.586 | 0.411 | 0.606 |
| 2.381 | 1.144 | 2.266 | 1.038 | 1.246 | 0.703 | 0.606 |
| 3.276 | 2.938 | 3.086 | 2.756 | 2.304 | 0.454 | 0.606 |
| 1.201 | 3.029 | 2.337 | 4.399 | 4.141 | 0.697 | 0.606 |
| 1.849 | 2.125 | 1.546 | 2.998 | 2.144 | 0.487 | 0.606 |
| 2.115 | 2.383 | 0.693 | 2.118 | 3.115 | 0.532 | 0.606 |
| 2.390 | 4.832 | 2.429 | 4.742 | 4.697 | 0.650 | 0.606 |

|       |       |       |       |       |       |       |
|-------|-------|-------|-------|-------|-------|-------|
| 2.724 | 2.618 | 3.709 | 2.288 | 2.318 | 0.527 | 0.606 |
| 2.823 | 1.885 | 2.198 | 2.754 | 2.181 | 0.429 | 0.606 |
| 3.400 | 4.401 | 6.500 | 4.476 | 4.334 | 0.607 | 0.606 |
| 2.288 | 2.333 | 1.909 | 3.730 | 3.972 | 0.527 | 0.606 |
| 3.412 | 2.211 | 1.812 | 3.084 | 2.847 | 0.465 | 0.606 |
| 3.746 | 2.579 | 2.914 | 1.968 | 2.903 | 0.645 | 0.606 |
| 2.048 | 2.805 | 2.179 | 1.847 | 2.456 | 0.487 | 0.606 |
| 4.102 | 3.461 | 3.398 | 2.441 | 2.302 | 0.461 | 0.606 |
| 2.960 | 2.095 | 1.951 | 2.440 | 2.086 | 0.446 | 0.606 |
| 4.538 | 3.769 | 4.736 | 4.140 | 4.051 | 0.430 | 0.606 |
| 1.728 | 4.229 | 2.166 | 4.216 | 3.855 | 0.653 | 0.606 |
| 2.237 | 3.829 | 2.680 | 3.077 | 2.511 | 0.454 | 0.606 |
| 2.904 | 3.225 | 4.000 | 2.337 | 2.908 | 0.453 | 0.606 |
| 2.820 | 2.064 | 2.458 | 1.786 | 2.012 | 0.458 | 0.606 |
| 2.243 | 2.644 | 3.578 | 1.610 | 2.706 | 0.558 | 0.606 |
| 1.920 | 2.701 | 2.168 | 1.605 | 3.473 | 0.501 | 0.606 |
| 2.628 | 2.705 | 1.935 | 2.559 | 2.712 | 0.420 | 0.606 |
| 4.434 | 4.089 | 4.451 | 2.781 | 3.507 | 0.609 | 0.606 |
| 1.846 | 3.571 | 1.887 | 3.935 | 3.656 | 0.590 | 0.606 |
| 3.342 | 3.299 | 4.236 | 3.204 | 3.101 | 0.451 | 0.606 |
| 4.171 | 4.307 | 4.445 | 4.168 | 5.379 | 0.438 | 0.606 |
| 4.155 | 4.082 | 4.492 | 3.744 | 4.690 | 0.489 | 0.606 |
| 4.612 | 2.199 | 5.201 | 1.890 | 1.360 | 0.920 | 0.606 |
| 3.911 | 4.835 | 5.006 | 2.925 | 4.202 | 0.538 | 0.606 |
| 4.988 | 4.348 | 4.523 | 4.166 | 3.975 | 0.373 | 0.606 |
| 3.475 | 2.861 | 2.429 | 2.630 | 2.743 | 0.469 | 0.606 |
| 2.354 | 2.442 | 2.984 | 2.662 | 2.548 | 0.492 | 0.606 |
| 4.658 | 4.800 | 1.590 | 4.690 | 4.886 | 0.994 | 0.606 |
| 2.578 | 2.011 | 3.760 | 2.818 | 2.819 | 0.476 | 0.606 |
| 2.004 | 2.266 | 2.876 | 3.491 | 2.046 | 0.639 | 0.606 |
| 4.387 | 3.282 | 4.396 | 3.943 | 3.303 | 0.581 | 0.606 |
| 2.493 | 4.443 | 2.964 | 0.936 | 4.872 | 0.902 | 0.606 |
| 2.005 | 2.486 | 2.868 | 2.372 | 2.663 | 0.460 | 0.606 |
| 2.266 | 3.165 | 1.805 | 3.336 | 3.112 | 0.409 | 0.606 |
| 2.440 | 1.401 | 3.289 | 1.587 | 2.264 | 0.620 | 0.606 |
| 3.571 | 3.783 | 2.898 | 4.404 | 3.821 | 0.402 | 0.606 |
| 4.221 | 3.756 | 4.260 | 4.137 | 3.680 | 0.591 | 0.606 |
| 8.205 | 7.326 | 8.662 | 6.086 | 6.411 | 0.618 | 0.606 |
| 4.873 | 4.722 | 4.787 | 5.277 | 4.630 | 0.443 | 0.606 |
| 4.470 | 3.907 | 4.983 | 3.759 | 4.231 | 0.424 | 0.606 |
| 3.572 | 2.166 | 4.021 | 1.813 | 2.094 | 0.646 | 0.606 |
| 6.897 | 6.380 | 8.356 | 4.689 | 5.049 | 0.730 | 0.606 |
| 2.393 | 3.526 | 2.287 | 2.968 | 2.879 | 0.439 | 0.606 |
| 3.019 | 2.976 | 2.678 | 2.908 | 2.077 | 0.512 | 0.606 |
| 3.906 | 4.315 | 2.531 | 5.134 | 4.384 | 0.526 | 0.606 |
| 3.152 | 2.636 | 2.521 | 3.216 | 3.023 | 0.467 | 0.606 |
| 1.784 | 3.351 | 1.976 | 4.089 | 4.098 | 0.617 | 0.606 |
| 3.537 | 2.443 | 3.470 | 2.604 | 2.209 | 0.559 | 0.606 |
| 1.668 | 2.517 | 1.179 | 3.451 | 3.334 | 0.602 | 0.606 |
| 2.771 | 2.458 | 2.654 | 2.704 | 2.168 | 0.498 | 0.606 |

|       |       |       |       |       |       |       |
|-------|-------|-------|-------|-------|-------|-------|
| 1.655 | 3.125 | 1.950 | 2.443 | 2.783 | 0.505 | 0.606 |
| 3.750 | 3.781 | 4.070 | 3.433 | 3.676 | 0.418 | 0.606 |
| 2.551 | 4.402 | 2.164 | 4.739 | 5.033 | 0.753 | 0.606 |
| 5.088 | 3.444 | 6.032 | 2.428 | 3.064 | 0.760 | 0.606 |
| 3.324 | 3.312 | 1.713 | 4.693 | 4.657 | 0.655 | 0.606 |
| 4.175 | 3.784 | 4.467 | 2.711 | 2.896 | 0.505 | 0.606 |
| 2.501 | 3.902 | 2.865 | 3.973 | 4.078 | 0.522 | 0.606 |
| 4.454 | 4.916 | 3.337 | 4.101 | 4.622 | 0.463 | 0.606 |
| 3.028 | 1.847 | 2.669 | 2.046 | 2.632 | 0.594 | 0.606 |
| 2.890 | 1.936 | 2.790 | 1.923 | 2.386 | 0.523 | 0.606 |
| 7.524 | 7.368 | 8.238 | 2.809 | 3.553 | 1.558 | 0.606 |
| 2.352 | 2.968 | 3.196 | 3.608 | 2.015 | 0.489 | 0.606 |
| 4.378 | 3.794 | 3.843 | 4.189 | 3.893 | 0.468 | 0.606 |
| 2.389 | 1.724 | 1.106 | 2.811 | 1.662 | 0.636 | 0.606 |
| 4.868 | 4.083 | 4.308 | 3.974 | 4.305 | 0.416 | 0.606 |
| 2.752 | 4.158 | 4.170 | 4.585 | 3.266 | 0.592 | 0.606 |
| 1.008 | 2.380 | 1.664 | 3.129 | 3.224 | 0.590 | 0.606 |
| 3.716 | 3.327 | 2.588 | 3.213 | 2.646 | 0.530 | 0.606 |
| 1.818 | 2.824 | 1.494 | 2.471 | 3.280 | 0.496 | 0.606 |
| 4.978 | 4.388 | 5.447 | 5.529 | 5.306 | 0.465 | 0.606 |
| 2.133 | 2.084 | 2.875 | 2.093 | 2.819 | 0.371 | 0.606 |
| 2.722 | 3.199 | 4.385 | 3.681 | 3.276 | 0.487 | 0.606 |
| 2.612 | 3.527 | 1.784 | 4.453 | 3.303 | 0.536 | 0.606 |
| 4.472 | 3.935 | 4.659 | 4.132 | 4.281 | 0.414 | 0.606 |
| 2.198 | 1.915 | 4.011 | 2.182 | 3.154 | 0.693 | 0.606 |
| 2.313 | 3.384 | 1.733 | 3.184 | 3.640 | 0.535 | 0.606 |
| 3.863 | 2.663 | 4.397 | 2.454 | 1.837 | 0.627 | 0.606 |
| 4.645 | 3.755 | 4.206 | 4.254 | 4.703 | 0.468 | 0.606 |
| 4.066 | 2.661 | 2.802 | 2.116 | 2.060 | 0.576 | 0.606 |
| 3.681 | 3.383 | 4.536 | 4.252 | 4.577 | 0.527 | 0.606 |
| 5.154 | 3.402 | 4.544 | 3.649 | 3.986 | 0.682 | 0.606 |
| 3.748 | 2.022 | 3.556 | 3.507 | 3.325 | 0.519 | 0.606 |
| 2.635 | 1.969 | 2.421 | 2.299 | 2.524 | 0.521 | 0.606 |
| 5.194 | 4.420 | 6.175 | 4.350 | 4.565 | 0.468 | 0.606 |
| 2.675 | 2.377 | 3.256 | 3.281 | 2.638 | 0.527 | 0.606 |
| 2.836 | 2.048 | 3.292 | 2.505 | 1.968 | 0.456 | 0.606 |
| 2.442 | 5.263 | 2.730 | 4.714 | 5.145 | 0.754 | 0.606 |
| 0.589 | 2.577 | 1.224 | 3.064 | 2.737 | 0.534 | 0.606 |
| 3.047 | 3.571 | 2.055 | 3.173 | 4.052 | 0.479 | 0.606 |
| 4.614 | 4.629 | 3.991 | 4.631 | 4.541 | 0.393 | 0.606 |
| 3.979 | 3.175 | 3.976 | 4.187 | 3.858 | 0.475 | 0.606 |
| 3.835 | 2.696 | 4.899 | 3.279 | 4.324 | 0.701 | 0.606 |
| 2.664 | 1.608 | 3.481 | 2.420 | 2.631 | 0.512 | 0.606 |
| 2.737 | 2.687 | 2.731 | 3.650 | 2.801 | 0.435 | 0.606 |
| 3.080 | 3.735 | 3.436 | 3.294 | 3.594 | 0.379 | 0.606 |
| 3.397 | 3.136 | 3.669 | 3.818 | 4.348 | 0.421 | 0.606 |
| 3.751 | 2.638 | 3.566 | 3.790 | 3.056 | 0.471 | 0.606 |
| 1.473 | 3.185 | 3.278 | 1.639 | 3.076 | 0.752 | 0.606 |
| 2.284 | 4.456 | 3.791 | 3.000 | 4.180 | 0.727 | 0.606 |
| 3.535 | 5.916 | 5.493 | 4.258 | 5.668 | 0.816 | 0.606 |



|       |       |       |       |       |       |       |
|-------|-------|-------|-------|-------|-------|-------|
| 3.087 | 2.669 | 2.115 | 3.420 | 2.743 | 0.491 | 0.606 |
| 4.975 | 4.380 | 5.549 | 3.821 | 4.077 | 0.442 | 0.606 |
| 2.023 | 2.374 | 2.582 | 3.053 | 2.404 | 0.457 | 0.606 |
| 2.622 | 2.312 | 3.315 | 2.417 | 2.325 | 0.433 | 0.606 |
| 1.602 | 2.043 | 1.027 | 3.321 | 2.330 | 0.512 | 0.606 |
| 4.120 | 3.542 | 4.175 | 4.376 | 4.741 | 0.427 | 0.606 |
| 1.491 | 1.972 | 2.088 | 2.352 | 2.100 | 0.382 | 0.606 |
| 2.087 | 3.129 | 3.130 | 3.486 | 2.289 | 0.506 | 0.606 |
| 1.706 | 2.567 | 3.097 | 3.643 | 2.642 | 0.660 | 0.606 |
| 1.701 | 2.906 | 2.994 | 3.777 | 2.839 | 0.686 | 0.606 |
| 1.994 | 2.618 | 2.982 | 3.590 | 3.851 | 0.502 | 0.606 |
| 4.404 | 3.726 | 5.248 | 3.364 | 3.908 | 0.477 | 0.606 |
| 4.554 | 4.767 | 4.880 | 4.585 | 4.286 | 0.502 | 0.606 |
| 2.931 | 3.519 | 3.464 | 3.118 | 2.831 | 0.399 | 0.606 |
| 3.000 | 6.523 | 1.767 | 2.321 | 3.636 | 1.098 | 0.606 |
| 3.491 | 2.470 | 4.268 | 3.247 | 2.813 | 0.535 | 0.606 |
| 4.833 | 4.491 | 3.888 | 5.433 | 5.055 | 0.660 | 0.606 |
| 3.759 | 3.191 | 3.691 | 3.385 | 3.258 | 0.436 | 0.606 |
| 1.593 | 0.928 | 1.566 | 2.009 | 1.436 | 0.811 | 0.606 |
| 2.847 | 2.536 | 3.348 | 2.514 | 2.274 | 0.484 | 0.606 |
| 3.192 | 2.593 | 1.955 | 2.091 | 2.008 | 0.408 | 0.606 |
| 1.730 | 2.944 | 1.785 | 3.237 | 3.188 | 0.466 | 0.606 |
| 2.967 | 2.279 | 2.038 | 2.386 | 2.643 | 0.408 | 0.606 |
| 1.876 | 2.577 | 2.465 | 1.988 | 2.024 | 0.397 | 0.606 |
| 5.654 | 4.375 | 5.988 | 4.021 | 4.344 | 0.693 | 0.606 |
| 6.711 | 7.011 | 6.900 | 7.627 | 7.291 | 0.390 | 0.606 |
| 4.879 | 2.304 | 3.656 | 2.000 | 3.092 | 0.867 | 0.606 |
| 1.575 | 2.209 | 1.768 | 3.417 | 2.440 | 0.460 | 0.606 |
| 3.741 | 2.750 | 3.527 | 2.113 | 3.279 | 0.526 | 0.606 |
| 1.989 | 2.737 | 3.602 | 2.930 | 3.261 | 0.489 | 0.606 |
| 3.320 | 2.841 | 4.234 | 3.508 | 2.453 | 0.482 | 0.606 |
| 3.894 | 3.408 | 3.423 | 2.788 | 3.729 | 0.569 | 0.606 |
| 3.354 | 3.398 | 3.079 | 2.805 | 2.474 | 0.369 | 0.606 |
| 4.835 | 3.701 | 4.127 | 3.169 | 3.546 | 0.537 | 0.606 |
| 4.375 | 4.612 | 3.419 | 4.674 | 4.752 | 0.378 | 0.606 |
| 2.027 | 2.256 | 2.144 | 1.400 | 2.198 | 0.416 | 0.606 |
| 2.055 | 3.345 | 2.589 | 2.467 | 2.243 | 0.443 | 0.606 |
| 2.807 | 2.403 | 4.466 | 2.313 | 1.567 | 0.631 | 0.606 |
| 1.799 | 2.053 | 2.073 | 3.330 | 3.444 | 0.471 | 0.606 |
| 3.452 | 3.104 | 2.293 | 2.217 | 3.102 | 0.440 | 0.606 |
| 3.965 | 2.408 | 3.602 | 2.571 | 1.470 | 0.657 | 0.606 |
| 5.080 | 4.509 | 5.171 | 4.246 | 4.510 | 0.450 | 0.606 |
| 5.165 | 4.518 | 5.612 | 4.878 | 4.119 | 0.460 | 0.606 |
| 1.768 | 3.074 | 2.195 | 3.287 | 2.686 | 0.540 | 0.606 |
| 2.859 | 3.192 | 3.775 | 3.005 | 2.112 | 0.445 | 0.606 |
| 2.582 | 2.407 | 1.398 | 1.906 | 1.986 | 0.401 | 0.606 |
| 2.939 | 3.586 | 2.867 | 3.745 | 3.451 | 0.405 | 0.606 |
| 3.522 | 4.249 | 3.409 | 4.579 | 4.101 | 0.624 | 0.606 |
| 4.249 | 2.570 | 4.085 | 2.913 | 2.157 | 0.739 | 0.606 |
| 3.129 | 1.877 | 3.022 | 2.689 | 2.315 | 0.414 | 0.606 |

|       |       |       |       |       |       |       |
|-------|-------|-------|-------|-------|-------|-------|
| 4.989 | 5.406 | 3.605 | 4.875 | 5.516 | 0.512 | 0.606 |
| 3.006 | 2.315 | 3.357 | 1.790 | 2.083 | 0.550 | 0.606 |
| 2.176 | 3.357 | 2.014 | 3.554 | 3.643 | 0.656 | 0.606 |
| 1.882 | 2.494 | 5.622 | 1.749 | 1.620 | 0.763 | 0.606 |
| 2.894 | 3.365 | 2.165 | 3.104 | 3.590 | 0.400 | 0.606 |
| 3.075 | 1.780 | 1.483 | 2.505 | 2.598 | 0.474 | 0.606 |
| 4.186 | 4.077 | 4.733 | 4.449 | 4.416 | 0.453 | 0.606 |
| 2.960 | 2.316 | 2.912 | 1.886 | 2.338 | 0.412 | 0.606 |
| 3.831 | 3.247 | 4.568 | 3.521 | 3.597 | 0.361 | 0.606 |
| 6.252 | 6.171 | 6.125 | 6.524 | 6.749 | 0.430 | 0.606 |
| 1.978 | 2.347 | 2.771 | 1.985 | 3.055 | 0.444 | 0.606 |
| 1.822 | 3.035 | 1.568 | 4.130 | 3.085 | 0.593 | 0.606 |
| 2.534 | 2.416 | 2.502 | 1.881 | 1.591 | 0.534 | 0.606 |
| 2.374 | 3.132 | 2.620 | 3.416 | 3.358 | 0.448 | 0.606 |
| 3.475 | 3.856 | 3.105 | 4.356 | 5.349 | 0.667 | 0.606 |
| 5.096 | 4.734 | 4.128 | 5.468 | 4.618 | 0.712 | 0.606 |
| 0.612 | 1.999 | 0.719 | 2.699 | 2.547 | 0.567 | 0.606 |
| 3.174 | 2.349 | 2.860 | 1.323 | 2.578 | 0.652 | 0.606 |
| 3.687 | 5.259 | 4.060 | 4.094 | 4.680 | 0.472 | 0.606 |
| 4.247 | 4.263 | 3.405 | 4.506 | 4.294 | 0.451 | 0.606 |
| 2.013 | 3.388 | 2.398 | 4.038 | 3.849 | 0.549 | 0.606 |
| 2.062 | 1.988 | 2.648 | 2.316 | 2.207 | 0.478 | 0.606 |
| 4.269 | 4.737 | 4.352 | 4.096 | 4.412 | 0.470 | 0.606 |
| 2.903 | 3.378 | 2.518 | 4.383 | 4.242 | 0.525 | 0.606 |
| 6.005 | 4.777 | 3.233 | 5.633 | 5.721 | 0.843 | 0.606 |
| 2.758 | 1.484 | 3.546 | 2.478 | 2.491 | 0.505 | 0.606 |
| 1.201 | 2.710 | 1.464 | 4.173 | 3.810 | 0.707 | 0.606 |
| 7.013 | 4.232 | 7.429 | 3.465 | 4.400 | 0.904 | 0.606 |
| 2.772 | 1.380 | 3.396 | 0.995 | 1.934 | 0.614 | 0.606 |
| 3.574 | 2.748 | 3.213 | 3.786 | 2.342 | 0.478 | 0.606 |
| 1.776 | 1.508 | 1.358 | 3.335 | 2.064 | 0.554 | 0.606 |
| 2.748 | 2.391 | 1.849 | 3.438 | 3.766 | 0.517 | 0.606 |
| 3.960 | 4.028 | 4.161 | 3.873 | 2.999 | 0.449 | 0.606 |
| 1.893 | 2.720 | 1.219 | 3.608 | 2.269 | 0.511 | 0.606 |
| 5.668 | 5.583 | 4.746 | 4.716 | 5.770 | 0.472 | 0.606 |
| 1.592 | 2.425 | 1.621 | 2.285 | 3.586 | 0.475 | 0.606 |
| 1.735 | 3.035 | 2.521 | 2.571 | 2.617 | 0.419 | 0.606 |
| 5.125 | 2.374 | 6.091 | 1.726 | 2.026 | 1.148 | 0.606 |
| 4.991 | 2.512 | 3.641 | 2.639 | 4.542 | 1.033 | 0.606 |
| 2.690 | 2.388 | 3.962 | 2.488 | 2.348 | 0.542 | 0.606 |
| 4.029 | 2.671 | 3.162 | 2.903 | 3.534 | 0.629 | 0.606 |
| 3.895 | 3.696 | 4.105 | 3.693 | 3.227 | 0.391 | 0.606 |
| 3.180 | 3.108 | 2.943 | 3.107 | 3.307 | 0.396 | 0.606 |
| 3.278 | 3.690 | 2.296 | 3.956 | 3.585 | 0.451 | 0.606 |
| 1.406 | 2.205 | 1.214 | 2.698 | 3.302 | 0.490 | 0.606 |
| 3.431 | 3.583 | 3.932 | 3.280 | 3.394 | 0.458 | 0.606 |
| 3.871 | 3.452 | 3.803 | 3.395 | 3.607 | 0.430 | 0.606 |
| 2.886 | 4.291 | 4.038 | 3.935 | 3.456 | 0.530 | 0.606 |
| 2.147 | 4.208 | 1.744 | 3.978 | 4.171 | 0.631 | 0.606 |
| 2.457 | 2.541 | 2.840 | 3.673 | 2.130 | 0.417 | 0.606 |

|       |       |       |       |       |       |       |
|-------|-------|-------|-------|-------|-------|-------|
| 3.824 | 4.722 | 4.094 | 3.606 | 4.812 | 0.523 | 0.606 |
| 5.015 | 5.767 | 5.193 | 6.165 | 6.708 | 0.608 | 0.606 |
| 2.641 | 3.914 | 2.007 | 4.848 | 4.263 | 0.659 | 0.606 |
| 2.618 | 2.626 | 2.040 | 1.967 | 2.850 | 0.423 | 0.606 |
| 2.579 | 2.625 | 1.754 | 2.031 | 2.457 | 0.465 | 0.606 |
| 4.962 | 3.632 | 5.412 | 3.650 | 3.142 | 0.687 | 0.606 |
| 4.864 | 1.352 | 2.841 | 2.390 | 2.494 | 0.738 | 0.606 |
| 6.299 | 4.515 | 5.758 | 5.579 | 5.116 | 0.674 | 0.606 |
| 3.275 | 1.959 | 3.170 | 2.690 | 2.529 | 0.492 | 0.606 |
| 4.351 | 3.805 | 3.765 | 3.776 | 3.357 | 0.437 | 0.606 |
| 2.870 | 4.404 | 2.382 | 3.513 | 3.738 | 0.540 | 0.606 |
| 3.147 | 1.568 | 2.626 | 2.055 | 2.375 | 0.562 | 0.606 |
| 4.063 | 3.560 | 2.134 | 3.762 | 4.122 | 0.700 | 0.606 |
| 3.205 | 3.234 | 1.903 | 3.934 | 3.192 | 0.582 | 0.606 |
| 2.212 | 2.960 | 2.517 | 2.120 | 1.594 | 0.663 | 0.606 |
| 5.286 | 6.197 | 5.594 | 5.809 | 6.165 | 0.425 | 0.606 |
| 2.747 | 2.260 | 2.756 | 2.355 | 2.814 | 0.425 | 0.606 |
| 4.100 | 2.651 | 4.949 | 2.546 | 2.290 | 0.583 | 0.606 |
| 2.705 | 2.889 | 2.706 | 2.771 | 2.384 | 0.426 | 0.606 |
| 4.279 | 3.466 | 3.560 | 3.784 | 2.048 | 0.776 | 0.606 |
| 1.519 | 2.786 | 2.016 | 2.701 | 3.081 | 0.458 | 0.606 |
| 1.447 | 2.655 | 2.057 | 3.232 | 2.780 | 0.453 | 0.606 |
| 3.137 | 2.641 | 3.734 | 2.337 | 2.579 | 0.447 | 0.606 |
| 3.512 | 2.599 | 4.806 | 2.346 | 2.392 | 0.578 | 0.606 |
| 3.469 | 3.085 | 3.673 | 3.392 | 2.841 | 0.446 | 0.606 |
| 2.830 | 3.378 | 2.665 | 3.340 | 3.750 | 0.422 | 0.606 |
| 2.482 | 2.560 | 2.670 | 2.653 | 3.133 | 0.351 | 0.606 |
| 3.504 | 2.705 | 2.840 | 3.672 | 3.010 | 0.492 | 0.606 |
| 5.630 | 4.332 | 5.685 | 4.571 | 4.231 | 0.538 | 0.606 |
| 1.533 | 2.503 | 3.121 | 2.212 | 1.969 | 0.426 | 0.606 |
| 6.837 | 5.186 | 6.063 | 6.429 | 6.373 | 0.452 | 0.606 |
| 3.152 | 1.850 | 2.785 | 3.351 | 2.802 | 0.710 | 0.606 |
| 3.524 | 2.658 | 4.993 | 2.616 | 2.951 | 0.569 | 0.606 |
| 3.785 | 3.717 | 4.424 | 4.286 | 4.228 | 0.370 | 0.606 |
| 4.803 | 4.251 | 4.602 | 5.055 | 4.129 | 0.454 | 0.606 |
| 2.400 | 2.518 | 2.006 | 2.951 | 2.874 | 0.506 | 0.606 |
| 5.416 | 5.235 | 5.743 | 5.294 | 5.100 | 0.435 | 0.606 |
| 3.151 | 3.590 | 3.587 | 2.743 | 3.381 | 0.543 | 0.606 |
| 3.724 | 2.922 | 3.501 | 2.639 | 1.482 | 0.613 | 0.606 |
| 3.184 | 2.942 | 3.551 | 3.328 | 4.042 | 0.417 | 0.606 |
| 2.083 | 2.620 | 2.318 | 2.872 | 3.181 | 0.605 | 0.606 |
| 5.129 | 3.426 | 4.895 | 3.252 | 4.078 | 0.586 | 0.606 |
| 1.166 | 1.943 | 3.143 | 3.327 | 2.422 | 0.445 | 0.606 |
| 1.728 | 2.193 | 2.792 | 2.118 | 1.596 | 0.561 | 0.606 |
| 2.175 | 2.149 | 2.676 | 1.484 | 2.175 | 0.482 | 0.606 |
| 3.581 | 3.456 | 3.373 | 4.361 | 3.768 | 0.326 | 0.606 |
| 2.448 | 2.978 | 1.375 | 2.653 | 3.534 | 0.483 | 0.606 |
| 3.300 | 2.943 | 3.628 | 2.994 | 3.429 | 0.420 | 0.606 |
| 1.637 | 2.884 | 1.545 | 2.952 | 2.426 | 0.501 | 0.606 |
| 4.820 | 5.576 | 4.003 | 4.934 | 5.206 | 0.582 | 0.606 |

|       |       |       |       |       |       |       |
|-------|-------|-------|-------|-------|-------|-------|
| 2.256 | 2.699 | 2.330 | 3.527 | 2.990 | 0.400 | 0.606 |
| 2.050 | 3.268 | 2.230 | 3.672 | 3.460 | 0.479 | 0.606 |
| 4.504 | 2.116 | 4.081 | 2.556 | 1.877 | 0.632 | 0.606 |
| 3.898 | 2.814 | 4.853 | 2.651 | 2.123 | 0.623 | 0.606 |
| 7.867 | 8.315 | 8.957 | 7.496 | 7.957 | 0.382 | 0.606 |
| 2.268 | 3.575 | 2.479 | 3.747 | 4.275 | 0.523 | 0.606 |
| 1.808 | 2.199 | 1.809 | 1.835 | 1.950 | 0.386 | 0.606 |
| 2.901 | 3.841 | 3.408 | 3.947 | 3.487 | 0.426 | 0.606 |
| 3.763 | 3.656 | 3.462 | 2.885 | 2.988 | 0.562 | 0.606 |
| 2.294 | 2.165 | 1.573 | 2.176 | 2.126 | 0.540 | 0.606 |
| 2.418 | 3.044 | 2.860 | 2.150 | 2.469 | 0.425 | 0.606 |
| 3.755 | 3.070 | 3.279 | 3.134 | 3.616 | 0.371 | 0.606 |
| 2.310 | 2.081 | 1.762 | 3.039 | 3.544 | 0.585 | 0.606 |
| 6.951 | 5.551 | 6.858 | 6.257 | 5.788 | 0.452 | 0.606 |
| 5.323 | 3.304 | 5.773 | 3.533 | 2.813 | 0.797 | 0.606 |
| 3.381 | 3.350 | 4.066 | 3.350 | 3.339 | 0.462 | 0.606 |
| 1.415 | 1.017 | 1.372 | 1.517 | 1.202 | 0.522 | 0.606 |
| 2.597 | 3.603 | 2.206 | 4.911 | 4.041 | 0.623 | 0.606 |
| 1.074 | 3.518 | 2.757 | 4.144 | 3.983 | 0.733 | 0.606 |
| 3.717 | 2.299 | 2.834 | 2.784 | 2.849 | 0.503 | 0.606 |
| 4.337 | 4.638 | 3.916 | 4.222 | 4.654 | 0.421 | 0.606 |
| 1.919 | 2.365 | 1.682 | 2.588 | 1.577 | 0.439 | 0.606 |
| 2.818 | 3.627 | 1.934 | 3.405 | 3.450 | 0.478 | 0.606 |
| 2.944 | 3.171 | 2.392 | 3.090 | 2.710 | 0.479 | 0.606 |
| 3.060 | 2.975 | 3.259 | 1.861 | 2.984 | 0.522 | 0.606 |
| 1.283 | 2.274 | 1.055 | 3.608 | 3.357 | 0.584 | 0.606 |
| 1.975 | 2.659 | 0.936 | 2.941 | 3.886 | 0.610 | 0.606 |
| 1.819 | 2.656 | 1.926 | 3.661 | 4.395 | 0.594 | 0.606 |
| 0.843 | 2.848 | 0.928 | 2.822 | 2.819 | 0.598 | 0.606 |
| 4.001 | 6.253 | 1.598 | 6.932 | 6.292 | 1.010 | 0.606 |
| 3.734 | 3.187 | 2.849 | 4.378 | 4.351 | 0.466 | 0.606 |
| 4.872 | 3.880 | 5.217 | 4.404 | 4.436 | 0.617 | 0.606 |
| 4.165 | 2.919 | 3.396 | 3.197 | 2.809 | 0.486 | 0.606 |
| 4.186 | 4.166 | 3.636 | 3.620 | 3.163 | 0.639 | 0.606 |
| 0.976 | 1.473 | 1.919 | 4.489 | 4.393 | 0.863 | 0.606 |
| 2.722 | 2.218 | 2.671 | 1.712 | 1.600 | 0.446 | 0.606 |
| 3.057 | 2.268 | 3.091 | 2.597 | 2.206 | 0.410 | 0.606 |
| 3.446 | 3.099 | 1.105 | 4.004 | 3.523 | 0.662 | 0.606 |
| 4.298 | 3.807 | 5.813 | 4.215 | 4.243 | 0.536 | 0.606 |
| 2.426 | 2.342 | 2.101 | 2.739 | 2.853 | 0.473 | 0.606 |
| 3.659 | 3.666 | 3.890 | 3.134 | 4.779 | 0.460 | 0.606 |
| 4.430 | 5.086 | 3.418 | 6.290 | 5.774 | 0.689 | 0.606 |
| 1.445 | 2.492 | 0.732 | 3.681 | 3.101 | 0.651 | 0.606 |
| 2.568 | 2.423 | 2.749 | 3.529 | 3.602 | 0.549 | 0.606 |
| 4.805 | 4.813 | 5.685 | 4.623 | 5.269 | 0.444 | 0.606 |
| 4.272 | 2.643 | 3.331 | 3.400 | 3.371 | 0.509 | 0.606 |
| 3.479 | 2.611 | 2.693 | 2.519 | 2.698 | 0.462 | 0.606 |
| 7.623 | 6.800 | 7.667 | 7.171 | 6.953 | 0.404 | 0.606 |
| 3.203 | 2.381 | 2.817 | 3.094 | 3.054 | 0.504 | 0.606 |
| 3.217 | 1.865 | 1.708 | 2.706 | 2.918 | 0.455 | 0.606 |

|       |       |        |       |       |       |       |
|-------|-------|--------|-------|-------|-------|-------|
| 2.590 | 2.125 | 1.952  | 2.282 | 2.687 | 0.487 | 0.606 |
| 3.563 | 2.953 | 3.715  | 3.212 | 3.339 | 0.440 | 0.606 |
| 3.146 | 2.564 | 4.051  | 2.919 | 3.277 | 0.469 | 0.606 |
| 3.365 | 2.985 | 3.939  | 3.473 | 3.369 | 0.429 | 0.606 |
| 2.246 | 2.033 | 1.379  | 3.081 | 2.720 | 0.464 | 0.606 |
| 3.842 | 2.576 | 3.482  | 3.906 | 3.592 | 0.470 | 0.606 |
| 4.365 | 4.487 | 5.479  | 3.413 | 3.862 | 0.449 | 0.606 |
| 2.995 | 2.782 | 2.745  | 2.476 | 3.259 | 0.444 | 0.606 |
| 7.325 | 7.094 | 7.399  | 7.226 | 7.392 | 0.448 | 0.606 |
| 4.084 | 2.335 | 3.071  | 2.402 | 2.393 | 0.528 | 0.606 |
| 1.176 | 2.890 | 1.007  | 3.390 | 3.023 | 0.664 | 0.606 |
| 2.781 | 4.300 | 2.274  | 5.049 | 5.069 | 0.694 | 0.606 |
| 7.485 | 6.673 | 7.767  | 7.033 | 6.313 | 0.466 | 0.606 |
| 2.107 | 2.414 | 2.570  | 2.716 | 2.306 | 0.366 | 0.606 |
| 4.294 | 4.219 | 4.825  | 3.791 | 4.057 | 0.499 | 0.606 |
| 6.230 | 3.034 | 6.706  | 3.303 | 3.531 | 0.879 | 0.606 |
| 3.122 | 2.784 | 3.718  | 2.572 | 3.629 | 0.506 | 0.606 |
| 2.169 | 1.378 | 1.159  | 1.418 | 1.317 | 0.656 | 0.606 |
| 4.005 | 3.728 | 3.882  | 2.657 | 3.633 | 0.429 | 0.606 |
| 3.061 | 3.135 | 5.480  | 2.919 | 2.571 | 0.609 | 0.606 |
| 3.783 | 5.730 | 3.503  | 6.147 | 5.732 | 0.733 | 0.606 |
| 4.365 | 4.168 | 2.374  | 4.606 | 4.760 | 0.637 | 0.606 |
| 7.887 | 6.975 | 8.235  | 7.555 | 7.888 | 0.463 | 0.606 |
| 2.582 | 1.852 | 3.242  | 2.647 | 2.450 | 0.389 | 0.606 |
| 2.147 | 1.408 | 1.182  | 2.584 | 1.947 | 0.481 | 0.606 |
| 2.660 | 2.245 | 2.389  | 3.226 | 2.716 | 0.476 | 0.606 |
| 3.270 | 3.403 | 2.918  | 3.359 | 3.875 | 0.450 | 0.606 |
| 3.058 | 2.746 | 3.298  | 4.377 | 4.044 | 0.446 | 0.606 |
| 2.620 | 2.918 | 3.659  | 2.818 | 2.818 | 0.423 | 0.606 |
| 2.117 | 3.336 | 4.221  | 2.688 | 2.883 | 0.503 | 0.606 |
| 2.255 | 2.470 | 3.136  | 2.992 | 2.393 | 0.475 | 0.606 |
| 2.532 | 3.001 | 2.316  | 2.783 | 2.690 | 0.421 | 0.606 |
| 2.377 | 2.566 | 2.953  | 1.853 | 1.769 | 0.477 | 0.606 |
| 2.422 | 3.146 | 1.716  | 3.203 | 3.054 | 0.553 | 0.606 |
| 2.782 | 3.491 | 1.838  | 3.568 | 2.962 | 0.548 | 0.606 |
| 3.388 | 3.953 | 2.446  | 3.646 | 4.210 | 0.436 | 0.606 |
| 2.962 | 2.954 | 3.735  | 3.584 | 3.001 | 0.446 | 0.606 |
| 3.091 | 3.541 | 3.705  | 2.730 | 3.791 | 0.520 | 0.606 |
| 1.859 | 2.684 | 2.733  | 4.529 | 3.621 | 0.594 | 0.606 |
| 2.586 | 2.682 | 4.150  | 3.667 | 3.277 | 0.449 | 0.606 |
| 3.244 | 4.654 | 3.501  | 4.727 | 4.810 | 0.495 | 0.606 |
| 3.293 | 3.699 | 1.840  | 2.074 | 2.252 | 0.836 | 0.606 |
| 4.378 | 4.359 | 4.529  | 4.284 | 4.285 | 0.448 | 0.606 |
| 4.890 | 5.153 | 3.872  | 5.953 | 5.749 | 0.535 | 0.606 |
| 6.543 | 7.579 | 4.335  | 7.514 | 7.495 | 0.791 | 0.606 |
| 1.927 | 2.012 | 3.391  | 2.724 | 2.901 | 0.429 | 0.606 |
| 9.294 | 9.736 | 10.006 | 9.005 | 9.452 | 0.314 | 0.606 |
| 2.897 | 3.966 | 3.758  | 3.516 | 3.178 | 0.415 | 0.606 |
| 2.658 | 2.728 | 2.992  | 2.455 | 2.201 | 0.401 | 0.606 |
| 6.589 | 7.109 | 7.734  | 6.661 | 6.688 | 0.372 | 0.606 |

|        |        |        |       |        |       |       |
|--------|--------|--------|-------|--------|-------|-------|
| 8.450  | 8.100  | 8.451  | 7.611 | 8.229  | 0.319 | 0.606 |
| 3.877  | 2.908  | 4.562  | 3.119 | 2.833  | 0.518 | 0.606 |
| 6.083  | 5.504  | 6.317  | 5.641 | 5.715  | 0.524 | 0.606 |
| 4.312  | 3.965  | 4.569  | 5.239 | 4.482  | 0.553 | 0.606 |
| 5.688  | 5.409  | 5.155  | 6.221 | 5.866  | 0.505 | 0.606 |
| 3.708  | 3.293  | 2.740  | 4.875 | 4.762  | 0.664 | 0.606 |
| 3.326  | 3.437  | 3.947  | 3.491 | 3.785  | 0.358 | 0.606 |
| 3.932  | 4.065  | 3.931  | 3.370 | 3.686  | 0.356 | 0.606 |
| 2.726  | 3.242  | 3.159  | 2.609 | 2.914  | 0.325 | 0.606 |
| 4.079  | 5.070  | 4.477  | 5.504 | 5.251  | 0.441 | 0.606 |
| 4.179  | 4.590  | 4.362  | 5.098 | 5.141  | 0.333 | 0.606 |
| 3.043  | 3.009  | 3.244  | 3.984 | 3.381  | 0.427 | 0.606 |
| 3.238  | 3.476  | 3.404  | 4.620 | 3.620  | 0.379 | 0.606 |
| 2.619  | 3.841  | 2.092  | 4.118 | 3.735  | 0.652 | 0.606 |
| 3.620  | 5.673  | 5.836  | 4.531 | 4.978  | 0.530 | 0.606 |
| 3.311  | 2.950  | 4.074  | 3.246 | 2.608  | 0.457 | 0.606 |
| 7.775  | 8.061  | 8.679  | 7.164 | 7.422  | 0.388 | 0.606 |
| 2.863  | 3.043  | 4.303  | 2.434 | 2.579  | 0.535 | 0.606 |
| 8.776  | 9.737  | 9.760  | 8.671 | 8.897  | 0.406 | 0.606 |
| 10.353 | 10.939 | 10.812 | 9.885 | 10.542 | 0.361 | 0.606 |
| 5.209  | 5.039  | 5.835  | 4.975 | 5.539  | 0.444 | 0.606 |
| 3.481  | 3.106  | 3.165  | 3.200 | 3.765  | 0.406 | 0.606 |
| 10.065 | 10.103 | 10.679 | 9.761 | 10.094 | 0.295 | 0.606 |
| 8.381  | 8.646  | 8.947  | 8.087 | 8.197  | 0.326 | 0.606 |
| 4.605  | 4.363  | 5.204  | 4.601 | 4.095  | 0.444 | 0.606 |
| 4.941  | 5.401  | 4.251  | 5.808 | 5.814  | 0.592 | 0.606 |
| 6.091  | 6.430  | 6.077  | 6.679 | 6.673  | 0.307 | 0.606 |
| 4.812  | 4.531  | 4.790  | 4.660 | 4.610  | 0.425 | 0.606 |
| 1.516  | 2.402  | 2.369  | 3.080 | 2.459  | 0.642 | 0.606 |
| 2.986  | 2.089  | 1.704  | 2.584 | 1.282  | 0.456 | 0.606 |
| 4.235  | 4.577  | 3.664  | 5.018 | 4.467  | 0.408 | 0.606 |
| 1.967  | 2.247  | 3.425  | 1.962 | 1.974  | 0.566 | 0.606 |
| 5.410  | 5.626  | 4.981  | 5.530 | 5.707  | 0.373 | 0.606 |
| 6.147  | 6.223  | 6.051  | 5.520 | 6.212  | 0.396 | 0.606 |
| 6.941  | 6.571  | 7.094  | 5.580 | 5.789  | 0.438 | 0.606 |
| 4.747  | 4.324  | 5.346  | 4.793 | 4.408  | 0.364 | 0.606 |
| 2.638  | 2.012  | 1.543  | 2.621 | 2.639  | 0.417 | 0.606 |
| 5.795  | 5.887  | 6.095  | 6.061 | 6.347  | 0.410 | 0.606 |
| 5.367  | 6.226  | 5.500  | 6.515 | 6.292  | 0.464 | 0.606 |
| 3.853  | 2.791  | 3.457  | 1.800 | 2.503  | 0.747 | 0.606 |
| 3.996  | 5.242  | 3.685  | 5.776 | 5.528  | 0.568 | 0.606 |
| 4.140  | 3.677  | 4.446  | 3.524 | 3.420  | 0.381 | 0.606 |
| 5.418  | 5.049  | 4.417  | 5.411 | 4.959  | 0.460 | 0.606 |
| 3.789  | 2.896  | 5.310  | 4.272 | 1.420  | 1.172 | 0.606 |
| 2.746  | 2.508  | 1.960  | 2.558 | 2.893  | 0.509 | 0.606 |
| 5.862  | 5.744  | 5.667  | 5.724 | 5.770  | 0.386 | 0.606 |
| 4.780  | 3.067  | 2.906  | 3.091 | 3.832  | 0.564 | 0.606 |
| 5.661  | 5.594  | 4.525  | 5.997 | 6.239  | 0.379 | 0.606 |
| 4.100  | 2.222  | 2.255  | 2.393 | 2.566  | 0.723 | 0.606 |
| 3.616  | 5.525  | 3.010  | 5.769 | 6.170  | 0.753 | 0.606 |

|        |       |        |       |       |       |       |
|--------|-------|--------|-------|-------|-------|-------|
| 3.053  | 3.705 | 1.430  | 4.005 | 3.862 | 0.613 | 0.606 |
| 5.397  | 5.360 | 4.977  | 5.923 | 5.677 | 0.371 | 0.606 |
| 7.181  | 7.627 | 6.080  | 7.883 | 7.898 | 0.441 | 0.606 |
| 6.516  | 6.002 | 7.625  | 4.806 | 4.731 | 0.586 | 0.606 |
| 1.561  | 2.295 | 1.203  | 3.604 | 3.589 | 0.599 | 0.606 |
| 7.750  | 7.974 | 6.911  | 8.669 | 8.425 | 0.454 | 0.606 |
| 4.737  | 5.410 | 3.061  | 5.492 | 5.477 | 0.621 | 0.606 |
| 9.314  | 9.586 | 9.023  | 9.686 | 9.548 | 0.320 | 0.606 |
| 4.158  | 4.190 | 4.480  | 4.788 | 4.832 | 0.371 | 0.606 |
| 2.885  | 4.052 | 2.619  | 4.252 | 3.910 | 0.450 | 0.606 |
| 3.551  | 6.232 | 2.508  | 6.615 | 6.079 | 0.838 | 0.606 |
| 1.384  | 3.105 | 1.858  | 4.279 | 3.649 | 0.629 | 0.606 |
| 1.441  | 2.940 | 0.864  | 3.260 | 2.920 | 0.582 | 0.606 |
| 3.282  | 2.746 | 3.225  | 1.882 | 2.977 | 0.468 | 0.606 |
| 2.711  | 3.610 | 2.300  | 3.257 | 3.433 | 0.458 | 0.606 |
| 6.313  | 5.534 | 6.785  | 4.876 | 4.784 | 0.538 | 0.606 |
| 5.307  | 6.162 | 5.111  | 6.623 | 6.206 | 0.410 | 0.606 |
| 8.002  | 9.095 | 6.357  | 9.229 | 9.027 | 0.637 | 0.606 |
| 4.951  | 5.096 | 3.553  | 5.756 | 5.455 | 0.564 | 0.606 |
| 2.619  | 1.671 | 3.032  | 1.695 | 2.121 | 0.561 | 0.606 |
| 4.572  | 5.128 | 3.691  | 5.496 | 5.316 | 0.454 | 0.606 |
| 2.450  | 2.350 | 2.924  | 2.029 | 2.121 | 0.393 | 0.606 |
| 4.086  | 4.529 | 2.782  | 4.439 | 4.382 | 0.406 | 0.606 |
| 6.827  | 7.341 | 6.753  | 7.351 | 7.346 | 0.357 | 0.606 |
| 5.749  | 6.017 | 4.650  | 6.261 | 6.221 | 0.419 | 0.606 |
| 3.706  | 3.767 | 2.741  | 3.843 | 4.352 | 0.588 | 0.606 |
| 1.193  | 4.968 | 2.379  | 5.668 | 5.674 | 1.055 | 0.606 |
| 4.878  | 4.221 | 4.202  | 4.195 | 4.876 | 0.335 | 0.606 |
| 6.589  | 7.491 | 5.186  | 8.067 | 7.854 | 0.812 | 0.606 |
| 6.798  | 5.967 | 6.444  | 5.907 | 5.702 | 0.419 | 0.606 |
| 3.899  | 3.694 | 4.122  | 3.070 | 3.252 | 0.383 | 0.606 |
| 3.438  | 2.514 | 2.332  | 2.088 | 2.214 | 0.425 | 0.606 |
| 3.469  | 4.012 | 3.706  | 2.453 | 3.336 | 0.537 | 0.606 |
| 3.308  | 5.664 | 5.730  | 3.561 | 5.190 | 1.378 | 0.606 |
| 4.227  | 4.681 | 4.228  | 3.506 | 3.955 | 0.444 | 0.606 |
| 1.826  | 2.591 | 1.991  | 0.963 | 1.746 | 0.575 | 0.606 |
| 4.489  | 4.734 | 4.026  | 4.347 | 4.323 | 0.326 | 0.606 |
| 3.584  | 6.198 | 5.423  | 4.001 | 5.042 | 0.996 | 0.606 |
| 4.214  | 6.265 | 5.589  | 4.471 | 5.243 | 1.072 | 0.606 |
| 10.317 | 9.233 | 10.828 | 7.860 | 8.604 | 0.637 | 0.606 |
| 4.185  | 3.223 | 4.694  | 3.454 | 3.604 | 0.448 | 0.606 |
| 5.826  | 5.280 | 6.895  | 4.108 | 3.882 | 0.610 | 0.606 |
| 7.635  | 7.479 | 7.315  | 8.006 | 7.937 | 0.341 | 0.606 |
| 2.889  | 3.818 | 3.686  | 4.160 | 3.978 | 0.385 | 0.606 |
| 6.440  | 6.201 | 7.206  | 5.255 | 5.781 | 0.414 | 0.606 |
| 6.762  | 5.817 | 5.289  | 6.090 | 5.925 | 0.446 | 0.606 |
| 4.720  | 2.931 | 4.203  | 3.215 | 3.934 | 0.507 | 0.606 |
| 5.253  | 4.941 | 5.065  | 5.060 | 4.719 | 0.333 | 0.606 |
| 3.055  | 3.523 | 3.401  | 3.333 | 2.722 | 0.470 | 0.606 |
| 5.690  | 6.171 | 5.778  | 6.404 | 6.578 | 0.379 | 0.606 |

|        |        |        |       |       |       |       |
|--------|--------|--------|-------|-------|-------|-------|
| 3.190  | 3.186  | 2.692  | 3.290 | 3.605 | 0.416 | 0.606 |
| 5.641  | 4.518  | 5.095  | 4.443 | 3.957 | 0.434 | 0.606 |
| 3.976  | 2.685  | 2.126  | 3.475 | 3.385 | 0.475 | 0.606 |
| 3.866  | 3.022  | 3.845  | 3.158 | 3.597 | 0.368 | 0.606 |
| 4.533  | 4.348  | 4.928  | 3.691 | 4.667 | 0.500 | 0.606 |
| 7.390  | 7.761  | 8.692  | 7.391 | 7.513 | 0.396 | 0.606 |
| 3.500  | 2.573  | 4.433  | 3.158 | 2.655 | 0.505 | 0.606 |
| 3.474  | 3.349  | 3.144  | 3.232 | 2.576 | 0.463 | 0.606 |
| 3.631  | 2.828  | 1.987  | 3.329 | 2.396 | 0.470 | 0.606 |
| 8.327  | 7.134  | 8.682  | 7.623 | 7.448 | 0.410 | 0.606 |
| 3.778  | 4.173  | 4.286  | 3.027 | 3.323 | 0.532 | 0.606 |
| 6.929  | 7.728  | 7.606  | 7.350 | 7.139 | 0.467 | 0.606 |
| 5.509  | 6.488  | 5.683  | 6.865 | 6.760 | 0.406 | 0.606 |
| 4.992  | 8.014  | 6.457  | 8.333 | 8.197 | 0.728 | 0.606 |
| 2.238  | 3.620  | 2.156  | 3.958 | 3.785 | 0.550 | 0.606 |
| 4.103  | 5.214  | 2.983  | 5.466 | 5.190 | 0.612 | 0.606 |
| 7.502  | 7.789  | 7.444  | 8.422 | 8.227 | 0.324 | 0.606 |
| 4.052  | 4.764  | 4.851  | 3.767 | 4.082 | 0.483 | 0.606 |
| 4.634  | 2.962  | 5.380  | 3.057 | 1.925 | 1.047 | 0.606 |
| 5.290  | 5.520  | 6.149  | 5.242 | 5.470 | 0.442 | 0.606 |
| 5.442  | 7.123  | 5.313  | 7.368 | 7.066 | 0.518 | 0.606 |
| 8.024  | 8.189  | 7.409  | 8.382 | 8.565 | 0.357 | 0.606 |
| 6.358  | 5.846  | 6.188  | 5.159 | 5.247 | 0.423 | 0.606 |
| 4.393  | 4.005  | 4.579  | 3.501 | 3.718 | 0.412 | 0.606 |
| 8.268  | 8.793  | 6.843  | 9.080 | 8.973 | 0.514 | 0.606 |
| 6.654  | 7.349  | 5.758  | 6.082 | 6.052 | 0.517 | 0.606 |
| 1.684  | 2.025  | 2.012  | 1.361 | 2.566 | 0.387 | 0.606 |
| 9.145  | 7.961  | 9.107  | 8.251 | 7.584 | 0.459 | 0.606 |
| 5.679  | 6.002  | 6.454  | 5.937 | 5.660 | 0.601 | 0.606 |
| 2.418  | 2.456  | 1.452  | 1.800 | 2.594 | 0.641 | 0.606 |
| 5.977  | 5.365  | 6.222  | 5.406 | 5.190 | 0.415 | 0.606 |
| 5.037  | 3.390  | 5.358  | 3.195 | 2.593 | 0.681 | 0.606 |
| 4.312  | 5.240  | 4.905  | 5.327 | 5.667 | 0.521 | 0.606 |
| 5.679  | 5.097  | 5.240  | 4.843 | 4.901 | 0.468 | 0.606 |
| 4.388  | 4.271  | 4.557  | 4.729 | 4.189 | 0.546 | 0.606 |
| 6.685  | 5.692  | 6.106  | 5.959 | 5.430 | 0.507 | 0.606 |
| 6.567  | 5.851  | 6.739  | 6.243 | 6.409 | 0.632 | 0.606 |
| 8.681  | 8.740  | 6.364  | 8.083 | 7.794 | 1.012 | 0.606 |
| 7.470  | 7.317  | 7.362  | 7.127 | 6.997 | 0.355 | 0.606 |
| 7.905  | 6.965  | 7.574  | 7.154 | 7.230 | 0.438 | 0.606 |
| 4.344  | 3.171  | 4.272  | 3.550 | 3.784 | 0.521 | 0.606 |
| 3.258  | 1.977  | 2.319  | 2.116 | 2.492 | 0.474 | 0.606 |
| 7.804  | 6.942  | 8.325  | 7.056 | 6.934 | 0.414 | 0.606 |
| 11.103 | 10.263 | 11.022 | 9.388 | 9.123 | 0.512 | 0.606 |
| 6.959  | 6.850  | 6.392  | 6.730 | 6.930 | 0.455 | 0.606 |
| 6.720  | 5.745  | 3.497  | 5.678 | 5.362 | 0.674 | 0.606 |
| 8.078  | 8.810  | 6.571  | 8.811 | 9.005 | 0.531 | 0.606 |
| 5.616  | 5.317  | 4.564  | 5.719 | 6.010 | 0.432 | 0.606 |
| 3.833  | 3.790  | 4.462  | 3.140 | 3.146 | 0.702 | 0.606 |
| 5.497  | 5.159  | 6.428  | 3.674 | 4.863 | 0.874 | 0.606 |



|       |       |       |       |       |       |       |
|-------|-------|-------|-------|-------|-------|-------|
| 3.129 | 3.523 | 3.182 | 3.151 | 3.834 | 0.393 | 0.606 |
| 2.066 | 2.854 | 2.389 | 2.898 | 2.836 | 0.341 | 0.606 |
| 3.273 | 1.454 | 2.838 | 2.263 | 2.737 | 0.595 | 0.606 |
| 7.635 | 7.899 | 4.151 | 8.372 | 8.420 | 0.904 | 0.606 |
| 7.061 | 7.766 | 5.718 | 7.656 | 8.043 | 0.571 | 0.606 |
| 6.642 | 7.799 | 3.228 | 8.415 | 8.492 | 1.034 | 0.606 |
| 6.521 | 7.732 | 4.606 | 7.769 | 8.030 | 0.769 | 0.606 |
| 7.122 | 6.801 | 4.624 | 7.766 | 7.186 | 0.644 | 0.606 |
| 5.765 | 7.236 | 2.738 | 7.907 | 7.412 | 0.953 | 0.606 |
| 5.703 | 5.104 | 3.146 | 5.327 | 5.716 | 0.691 | 0.606 |
| 5.612 | 3.283 | 1.650 | 3.734 | 3.830 | 0.823 | 0.606 |
| 7.161 | 8.471 | 4.026 | 8.772 | 8.602 | 1.056 | 0.606 |
| 6.192 | 7.222 | 2.815 | 7.209 | 7.281 | 1.143 | 0.606 |
| 5.590 | 3.087 | 3.015 | 3.376 | 3.734 | 0.599 | 0.606 |
| 3.469 | 3.458 | 4.292 | 3.568 | 3.505 | 0.449 | 0.606 |
| 3.280 | 2.420 | 3.722 | 3.314 | 1.906 | 0.494 | 0.606 |
| 3.245 | 4.782 | 0.778 | 4.855 | 5.230 | 0.938 | 0.606 |
| 3.130 | 3.032 | 2.261 | 2.914 | 4.105 | 0.427 | 0.606 |
| 3.469 | 2.869 | 2.344 | 2.647 | 2.723 | 0.510 | 0.606 |
| 3.690 | 2.884 | 3.104 | 3.189 | 3.244 | 0.469 | 0.606 |
| 2.984 | 3.638 | 2.757 | 2.852 | 1.816 | 0.671 | 0.606 |
| 6.575 | 6.831 | 6.361 | 6.850 | 7.088 | 0.338 | 0.606 |
| 7.981 | 6.919 | 8.239 | 6.960 | 8.092 | 0.690 | 0.606 |
| 4.352 | 4.700 | 4.839 | 4.766 | 4.640 | 0.423 | 0.606 |
| 3.431 | 4.069 | 2.968 | 4.216 | 4.656 | 0.433 | 0.606 |
| 3.531 | 2.949 | 4.089 | 3.380 | 2.969 | 0.446 | 0.606 |
| 4.125 | 4.721 | 4.492 | 3.903 | 4.025 | 0.581 | 0.606 |
| 4.496 | 5.354 | 5.795 | 5.184 | 5.134 | 0.619 | 0.606 |
| 4.362 | 4.416 | 5.348 | 4.657 | 4.590 | 0.579 | 0.606 |
| 4.625 | 3.079 | 5.688 | 5.673 | 5.124 | 1.277 | 0.606 |
| 4.440 | 4.440 | 4.692 | 3.797 | 4.440 | 0.534 | 0.606 |
| 3.373 | 3.348 | 4.528 | 3.822 | 4.207 | 0.564 | 0.606 |
| 4.451 | 4.590 | 5.299 | 5.206 | 5.569 | 0.403 | 0.606 |
| 1.707 | 1.774 | 1.016 | 2.302 | 2.318 | 0.441 | 0.606 |
| 5.553 | 5.348 | 5.156 | 5.793 | 5.541 | 0.588 | 0.606 |
| 3.106 | 2.680 | 1.368 | 4.164 | 3.536 | 0.596 | 0.606 |
| 2.962 | 3.204 | 2.940 | 2.779 | 3.108 | 0.442 | 0.606 |
| 4.693 | 4.678 | 5.416 | 3.913 | 4.929 | 0.432 | 0.606 |
| 4.221 | 4.124 | 5.070 | 4.078 | 4.526 | 0.360 | 0.606 |
| 6.953 | 6.245 | 7.190 | 6.303 | 6.193 | 0.384 | 0.606 |
| 3.653 | 3.311 | 3.412 | 2.166 | 2.819 | 0.693 | 0.606 |
| 6.773 | 5.669 | 7.599 | 5.420 | 5.747 | 0.650 | 0.606 |
| 3.808 | 2.207 | 1.871 | 1.868 | 3.206 | 0.575 | 0.606 |
| 2.582 | 3.645 | 2.671 | 3.589 | 3.295 | 0.358 | 0.606 |
| 2.565 | 2.466 | 2.094 | 3.747 | 3.173 | 0.441 | 0.606 |
| 2.866 | 2.224 | 2.687 | 2.031 | 2.381 | 0.664 | 0.606 |
| 6.660 | 6.915 | 5.870 | 7.131 | 6.904 | 0.352 | 0.606 |
| 3.722 | 5.090 | 4.413 | 5.175 | 4.911 | 0.496 | 0.606 |
| 3.331 | 4.437 | 4.180 | 3.244 | 2.986 | 0.776 | 0.606 |
| 7.913 | 8.493 | 7.531 | 8.817 | 8.805 | 0.430 | 0.606 |

|       |        |       |        |        |       |       |
|-------|--------|-------|--------|--------|-------|-------|
| 4.955 | 5.141  | 4.303 | 6.058  | 5.299  | 0.523 | 0.606 |
| 2.841 | 4.220  | 1.618 | 1.668  | 5.262  | 1.430 | 0.606 |
| 4.373 | 4.595  | 5.121 | 4.630  | 4.911  | 0.459 | 0.606 |
| 4.186 | 5.318  | 6.035 | 3.952  | 3.999  | 0.600 | 0.606 |
| 5.311 | 4.488  | 5.868 | 4.243  | 4.384  | 0.568 | 0.606 |
| 4.787 | 5.319  | 4.156 | 4.849  | 5.960  | 0.435 | 0.606 |
| 7.164 | 6.655  | 8.215 | 4.183  | 5.265  | 0.789 | 0.606 |
| 3.281 | 3.397  | 4.654 | 2.157  | 2.122  | 0.608 | 0.606 |
| 6.805 | 5.738  | 6.645 | 6.433  | 6.370  | 0.453 | 0.606 |
| 4.483 | 3.582  | 4.885 | 4.299  | 3.728  | 0.508 | 0.606 |
| 5.034 | 5.266  | 4.893 | 4.842  | 4.419  | 0.413 | 0.606 |
| 2.694 | 4.085  | 2.849 | 3.359  | 2.975  | 0.482 | 0.606 |
| 2.588 | 3.318  | 3.109 | 2.663  | 3.738  | 0.459 | 0.606 |
| 3.896 | 4.420  | 4.683 | 4.023  | 3.621  | 0.387 | 0.606 |
| 4.930 | 4.935  | 5.781 | 4.537  | 4.282  | 0.383 | 0.606 |
| 6.281 | 5.460  | 6.869 | 4.613  | 4.627  | 0.567 | 0.606 |
| 4.823 | 5.578  | 4.055 | 5.986  | 5.571  | 0.470 | 0.606 |
| 3.713 | 3.351  | 2.710 | 3.391  | 3.466  | 0.448 | 0.606 |
| 7.026 | 6.281  | 6.792 | 5.959  | 5.904  | 0.384 | 0.606 |
| 3.829 | 4.862  | 3.872 | 5.039  | 4.832  | 0.460 | 0.606 |
| 6.528 | 5.678  | 7.274 | 5.335  | 5.491  | 0.512 | 0.606 |
| 5.292 | 6.505  | 3.817 | 6.705  | 6.480  | 0.619 | 0.606 |
| 2.211 | 2.871  | 2.306 | 3.071  | 3.143  | 0.404 | 0.606 |
| 7.317 | 7.094  | 7.484 | 7.557  | 7.242  | 0.351 | 0.606 |
| 6.930 | 7.207  | 7.306 | 7.437  | 7.445  | 0.310 | 0.606 |
| 5.044 | 5.632  | 5.132 | 5.673  | 5.735  | 0.317 | 0.606 |
| 6.663 | 6.921  | 6.479 | 6.275  | 6.468  | 0.355 | 0.606 |
| 5.512 | 4.386  | 6.046 | 3.944  | 3.539  | 0.592 | 0.606 |
| 6.050 | 5.837  | 6.672 | 4.735  | 5.486  | 0.439 | 0.606 |
| 6.560 | 5.454  | 6.648 | 4.403  | 4.669  | 0.581 | 0.606 |
| 5.429 | 6.089  | 5.680 | 6.778  | 6.638  | 0.372 | 0.606 |
| 2.491 | 2.888  | 2.407 | 2.022  | 2.407  | 0.435 | 0.606 |
| 9.414 | 10.400 | 7.696 | 10.530 | 10.496 | 0.639 | 0.606 |
| 7.691 | 7.151  | 8.358 | 5.867  | 6.907  | 0.488 | 0.606 |
| 5.283 | 6.937  | 3.859 | 6.801  | 6.096  | 0.676 | 0.606 |
| 5.693 | 5.599  | 4.442 | 5.509  | 5.693  | 0.360 | 0.606 |
| 6.263 | 6.815  | 6.271 | 6.594  | 6.473  | 0.313 | 0.606 |
| 5.476 | 5.390  | 5.520 | 5.674  | 5.460  | 0.345 | 0.606 |
| 4.495 | 5.028  | 3.840 | 5.011  | 4.697  | 0.363 | 0.606 |
| 1.448 | 2.635  | 3.936 | 3.072  | 2.991  | 0.675 | 0.606 |
| 3.059 | 3.100  | 2.827 | 2.991  | 2.757  | 0.339 | 0.606 |
| 7.246 | 6.787  | 8.114 | 6.146  | 6.555  | 0.448 | 0.606 |
| 4.878 | 5.000  | 4.630 | 5.365  | 5.291  | 0.369 | 0.606 |
| 2.221 | 2.892  | 3.047 | 1.311  | 1.842  | 0.714 | 0.606 |
| 2.421 | 5.770  | 5.464 | 1.381  | 2.429  | 1.115 | 0.606 |
| 2.389 | 1.972  | 1.709 | 1.725  | 1.470  | 0.548 | 0.606 |
| 4.846 | 5.776  | 5.809 | 3.681  | 4.867  | 0.596 | 0.606 |
| 5.312 | 5.583  | 5.681 | 4.738  | 4.665  | 0.374 | 0.606 |
| 3.262 | 3.535  | 3.175 | 3.282  | 3.865  | 0.556 | 0.606 |
| 5.757 | 5.887  | 6.569 | 5.812  | 5.534  | 0.432 | 0.606 |

|       |       |       |       |       |       |       |
|-------|-------|-------|-------|-------|-------|-------|
| 3.461 | 3.261 | 4.124 | 3.067 | 3.381 | 0.534 | 0.606 |
| 1.986 | 2.338 | 2.350 | 2.287 | 3.690 | 0.740 | 0.606 |
| 3.150 | 5.693 | 3.826 | 3.614 | 2.228 | 1.151 | 0.606 |
| 5.593 | 8.001 | 6.187 | 8.135 | 7.688 | 0.995 | 0.606 |
| 5.723 | 6.181 | 4.934 | 5.043 | 5.606 | 0.445 | 0.606 |
| 4.447 | 4.654 | 6.125 | 4.388 | 4.801 | 0.686 | 0.606 |
| 8.338 | 9.366 | 8.614 | 9.681 | 9.463 | 0.506 | 0.606 |
| 3.324 | 2.091 | 3.187 | 1.239 | 1.894 | 0.661 | 0.606 |
| 3.561 | 3.544 | 3.958 | 3.464 | 3.872 | 0.428 | 0.606 |
| 4.433 | 3.562 | 5.085 | 3.407 | 3.586 | 0.495 | 0.606 |
| 4.419 | 6.773 | 2.433 | 7.055 | 6.709 | 0.938 | 0.606 |
| 6.342 | 7.076 | 7.267 | 7.535 | 7.550 | 0.383 | 0.606 |
| 3.666 | 4.800 | 4.028 | 4.880 | 4.871 | 0.516 | 0.606 |
| 4.244 | 4.753 | 4.139 | 5.391 | 5.135 | 0.449 | 0.606 |
| 4.914 | 4.905 | 5.753 | 5.445 | 5.473 | 0.363 | 0.606 |
| 4.976 | 4.454 | 3.062 | 4.744 | 5.101 | 0.533 | 0.606 |
| 7.017 | 7.178 | 5.005 | 7.756 | 7.486 | 0.562 | 0.606 |
| 7.485 | 7.583 | 5.415 | 7.502 | 7.622 | 0.580 | 0.606 |
| 6.799 | 6.121 | 6.542 | 6.052 | 6.240 | 0.342 | 0.606 |
| 2.401 | 4.629 | 3.792 | 3.226 | 2.736 | 0.874 | 0.606 |
| 4.177 | 3.658 | 5.338 | 2.660 | 3.718 | 0.559 | 0.606 |
| 4.838 | 4.721 | 5.027 | 4.283 | 4.251 | 0.390 | 0.606 |
| 2.789 | 4.642 | 6.905 | 5.099 | 5.207 | 0.819 | 0.606 |
| 2.411 | 1.990 | 2.062 | 2.090 | 2.308 | 0.411 | 0.606 |
| 3.283 | 2.764 | 2.332 | 3.023 | 3.065 | 0.828 | 0.606 |
| 6.606 | 6.893 | 7.393 | 6.047 | 6.213 | 0.388 | 0.606 |
| 4.139 | 4.141 | 1.910 | 3.836 | 4.984 | 0.591 | 0.606 |
| 6.883 | 6.962 | 6.568 | 7.087 | 7.163 | 0.335 | 0.606 |
| 6.561 | 6.939 | 7.871 | 5.397 | 5.380 | 0.614 | 0.606 |
| 5.022 | 4.312 | 5.754 | 2.357 | 2.800 | 0.834 | 0.606 |
| 3.504 | 5.058 | 3.478 | 5.323 | 5.268 | 0.495 | 0.606 |
| 4.625 | 5.309 | 4.623 | 5.346 | 4.502 | 0.408 | 0.606 |
| 3.154 | 3.177 | 3.177 | 3.098 | 3.067 | 0.401 | 0.606 |
| 5.627 | 5.774 | 3.250 | 6.122 | 5.752 | 0.713 | 0.606 |
| 5.975 | 5.588 | 3.111 | 5.814 | 5.611 | 0.588 | 0.606 |
| 6.726 | 7.289 | 5.852 | 7.468 | 6.930 | 0.442 | 0.606 |
| 7.805 | 8.599 | 7.110 | 8.546 | 8.790 | 0.493 | 0.606 |
| 2.445 | 3.259 | 2.969 | 3.126 | 2.897 | 0.389 | 0.606 |
| 2.446 | 4.263 | 2.678 | 3.825 | 3.682 | 0.482 | 0.606 |
| 4.557 | 4.555 | 6.136 | 4.033 | 4.339 | 0.512 | 0.606 |
| 8.804 | 8.938 | 7.020 | 9.728 | 9.451 | 0.507 | 0.606 |
| 5.261 | 4.910 | 5.194 | 4.637 | 4.383 | 0.330 | 0.606 |
| 1.669 | 3.314 | 2.564 | 2.102 | 2.702 | 0.450 | 0.606 |
| 3.679 | 2.790 | 2.908 | 2.493 | 2.921 | 0.423 | 0.606 |
| 4.657 | 4.342 | 5.685 | 4.129 | 3.966 | 0.401 | 0.606 |
| 4.656 | 3.764 | 4.571 | 3.441 | 3.510 | 0.505 | 0.606 |
| 3.822 | 4.267 | 2.682 | 3.497 | 3.845 | 0.575 | 0.606 |
| 2.166 | 3.783 | 3.287 | 3.271 | 2.945 | 0.464 | 0.606 |
| 7.115 | 8.408 | 3.739 | 8.677 | 8.453 | 0.889 | 0.606 |
| 5.592 | 5.780 | 6.295 | 4.307 | 4.754 | 0.440 | 0.606 |

|       |       |       |       |       |       |       |
|-------|-------|-------|-------|-------|-------|-------|
| 1.449 | 2.854 | 1.466 | 2.561 | 3.130 | 0.440 | 0.606 |
| 2.896 | 2.662 | 3.481 | 2.293 | 2.615 | 0.395 | 0.606 |
| 5.954 | 4.748 | 6.913 | 2.963 | 3.978 | 0.786 | 0.606 |
| 5.107 | 5.828 | 2.139 | 6.167 | 6.112 | 0.875 | 0.606 |
| 2.156 | 3.102 | 2.496 | 3.311 | 3.584 | 0.478 | 0.606 |
| 1.785 | 1.881 | 2.169 | 2.614 | 1.624 | 0.388 | 0.606 |
| 5.204 | 6.726 | 4.438 | 7.145 | 6.913 | 0.724 | 0.606 |
| 5.061 | 5.124 | 6.020 | 3.936 | 4.667 | 0.438 | 0.606 |
| 5.033 | 5.777 | 5.358 | 5.071 | 5.372 | 0.386 | 0.606 |
| 6.488 | 8.411 | 5.291 | 8.488 | 8.454 | 0.824 | 0.606 |
| 6.114 | 5.351 | 7.603 | 4.254 | 4.974 | 0.649 | 0.606 |
| 3.437 | 3.718 | 2.673 | 3.916 | 3.992 | 0.490 | 0.606 |
| 3.618 | 3.725 | 5.006 | 3.096 | 2.979 | 0.554 | 0.606 |
| 3.030 | 2.676 | 2.748 | 1.861 | 3.168 | 0.432 | 0.606 |
| 2.782 | 3.592 | 3.113 | 3.146 | 3.435 | 0.405 | 0.606 |
| 8.008 | 5.589 | 3.889 | 5.870 | 6.581 | 0.839 | 0.606 |
| 4.095 | 5.006 | 5.113 | 5.209 | 4.956 | 0.454 | 0.606 |
| 4.540 | 6.060 | 3.531 | 6.357 | 5.909 | 0.647 | 0.606 |
| 5.400 | 5.332 | 5.876 | 4.450 | 4.425 | 0.444 | 0.606 |
| 3.840 | 4.059 | 5.099 | 3.389 | 3.505 | 0.402 | 0.606 |
| 5.520 | 4.507 | 6.316 | 4.229 | 4.605 | 0.470 | 0.606 |
| 3.074 | 3.556 | 2.883 | 4.026 | 3.776 | 0.411 | 0.606 |
| 3.642 | 3.149 | 2.412 | 4.181 | 3.615 | 0.479 | 0.606 |
| 5.518 | 4.811 | 6.158 | 3.411 | 4.028 | 0.604 | 0.606 |
| 5.319 | 5.977 | 5.534 | 6.292 | 6.023 | 0.430 | 0.606 |
| 3.342 | 4.483 | 1.723 | 4.135 | 4.446 | 0.718 | 0.606 |
| 4.271 | 5.361 | 4.209 | 5.123 | 4.991 | 0.526 | 0.606 |
| 6.182 | 6.014 | 6.979 | 5.789 | 5.643 | 0.381 | 0.606 |
| 4.518 | 5.666 | 6.158 | 3.811 | 4.434 | 0.751 | 0.606 |
| 1.918 | 1.872 | 2.251 | 2.022 | 2.069 | 0.426 | 0.606 |
| 2.947 | 2.814 | 3.550 | 1.580 | 2.316 | 0.759 | 0.606 |
| 2.725 | 4.046 | 3.708 | 2.792 | 2.723 | 0.722 | 0.606 |
| 4.169 | 4.169 | 4.551 | 2.853 | 3.612 | 0.565 | 0.606 |
| 3.307 | 4.193 | 4.509 | 1.918 | 3.089 | 0.802 | 0.606 |
| 4.633 | 5.531 | 4.572 | 5.015 | 4.161 | 0.669 | 0.606 |
| 4.381 | 3.440 | 5.340 | 2.798 | 3.431 | 0.651 | 0.606 |
| 6.454 | 6.441 | 5.471 | 6.837 | 6.391 | 0.363 | 0.606 |
| 6.523 | 7.152 | 6.041 | 7.467 | 7.557 | 0.417 | 0.606 |
| 7.371 | 8.148 | 7.630 | 8.510 | 8.105 | 0.346 | 0.606 |
| 3.781 | 3.720 | 4.210 | 3.327 | 3.046 | 0.482 | 0.606 |
| 5.984 | 5.408 | 6.537 | 4.617 | 4.736 | 0.447 | 0.606 |
| 4.426 | 4.352 | 3.799 | 4.692 | 4.652 | 0.333 | 0.606 |
| 1.683 | 2.495 | 1.616 | 2.908 | 2.643 | 0.416 | 0.606 |
| 4.954 | 5.316 | 4.558 | 5.974 | 5.628 | 0.363 | 0.606 |
| 2.539 | 2.719 | 1.982 | 4.144 | 3.458 | 0.477 | 0.606 |
| 1.761 | 2.876 | 1.680 | 2.144 | 2.171 | 0.438 | 0.606 |
| 6.502 | 5.890 | 5.755 | 5.945 | 5.809 | 0.342 | 0.606 |
| 4.488 | 4.755 | 5.755 | 3.284 | 3.774 | 0.583 | 0.606 |
| 8.228 | 7.372 | 9.146 | 6.868 | 6.833 | 0.544 | 0.606 |
| 3.619 | 4.253 | 4.951 | 2.399 | 2.853 | 0.901 | 0.606 |

|       |        |        |        |        |       |       |
|-------|--------|--------|--------|--------|-------|-------|
| 6.161 | 6.291  | 5.327  | 6.345  | 6.178  | 0.398 | 0.606 |
| 5.872 | 3.794  | 2.270  | 4.182  | 3.680  | 1.040 | 0.606 |
| 3.609 | 2.764  | 2.465  | 4.046  | 3.929  | 0.455 | 0.606 |
| 3.330 | 5.148  | 5.502  | 2.420  | 2.960  | 1.038 | 0.606 |
| 5.903 | 5.634  | 6.001  | 4.897  | 5.066  | 0.416 | 0.606 |
| 7.423 | 8.042  | 2.546  | 8.055  | 7.893  | 1.258 | 0.606 |
| 3.171 | 3.739  | 2.707  | 4.418  | 4.142  | 0.472 | 0.606 |
| 3.548 | 3.193  | 4.031  | 2.995  | 3.028  | 0.358 | 0.606 |
| 5.079 | 4.880  | 6.430  | 4.007  | 4.605  | 0.676 | 0.606 |
| 2.715 | 2.489  | 2.419  | 3.480  | 5.299  | 1.081 | 0.606 |
| 5.046 | 4.445  | 2.650  | 4.774  | 4.840  | 0.650 | 0.606 |
| 8.844 | 8.437  | 10.033 | 8.252  | 7.743  | 0.881 | 0.606 |
| 5.807 | 5.788  | 5.516  | 6.157  | 6.525  | 0.460 | 0.606 |
| 3.887 | 3.619  | 3.744  | 2.782  | 3.207  | 0.389 | 0.606 |
| 4.391 | 4.620  | 4.062  | 4.954  | 5.078  | 0.390 | 0.606 |
| 1.810 | 1.895  | 2.192  | 1.319  | 3.473  | 0.661 | 0.606 |
| 4.002 | 4.893  | 3.141  | 5.426  | 5.505  | 0.526 | 0.606 |
| 5.152 | 5.821  | 5.231  | 4.249  | 3.998  | 0.636 | 0.606 |
| 3.639 | 4.143  | 4.541  | 3.923  | 4.180  | 0.441 | 0.606 |
| 4.126 | 4.988  | 3.997  | 4.488  | 5.380  | 0.576 | 0.606 |
| 4.267 | 4.804  | 4.304  | 5.210  | 5.222  | 0.465 | 0.606 |
| 4.617 | 5.031  | 6.261  | 4.720  | 5.548  | 0.561 | 0.606 |
| 5.889 | 5.979  | 5.769  | 6.293  | 6.134  | 0.419 | 0.606 |
| 7.457 | 5.954  | 2.280  | 6.390  | 6.705  | 1.197 | 0.606 |
| 3.565 | 10.082 | 4.205  | 10.128 | 9.742  | 1.470 | 0.606 |
| 2.156 | 2.674  | 2.171  | 3.021  | 2.589  | 0.399 | 0.606 |
| 4.721 | 2.620  | 2.456  | 3.307  | 1.925  | 0.740 | 0.606 |
| 4.942 | 5.281  | 5.283  | 5.647  | 5.709  | 0.449 | 0.606 |
| 6.178 | 6.807  | 5.247  | 7.160  | 7.068  | 0.560 | 0.606 |
| 9.602 | 9.899  | 8.351  | 9.787  | 10.404 | 0.500 | 0.606 |
| 3.834 | 4.121  | 5.441  | 3.159  | 3.891  | 0.616 | 0.606 |
| 3.306 | 3.682  | 1.626  | 3.869  | 3.000  | 0.537 | 0.606 |
| 1.092 | 2.035  | 1.129  | 2.953  | 2.895  | 0.507 | 0.606 |
| 5.991 | 5.303  | 6.534  | 5.228  | 5.190  | 0.445 | 0.606 |
| 4.581 | 3.202  | 2.915  | 3.256  | 4.178  | 0.487 | 0.606 |
| 3.266 | 3.368  | 2.588  | 2.853  | 2.540  | 0.452 | 0.606 |
| 4.181 | 2.419  | 3.278  | 2.967  | 3.277  | 0.537 | 0.606 |
| 2.447 | 3.002  | 2.303  | 3.608  | 3.378  | 0.492 | 0.606 |
| 3.012 | 3.159  | 3.096  | 2.272  | 2.861  | 0.488 | 0.606 |
| 9.458 | 9.450  | 10.071 | 9.573  | 9.897  | 0.337 | 0.606 |
| 5.707 | 5.371  | 4.753  | 5.847  | 5.749  | 0.529 | 0.606 |
| 4.191 | 3.464  | 4.096  | 3.800  | 3.698  | 0.573 | 0.606 |
| 6.455 | 5.487  | 6.052  | 5.300  | 5.112  | 0.405 | 0.606 |
| 6.575 | 7.000  | 5.020  | 7.808  | 7.596  | 0.599 | 0.606 |
| 6.337 | 4.867  | 6.477  | 4.076  | 4.689  | 0.631 | 0.606 |
| 5.793 | 6.041  | 4.741  | 6.499  | 6.204  | 0.420 | 0.606 |
| 3.285 | 3.221  | 3.126  | 3.507  | 3.736  | 0.385 | 0.606 |
| 6.426 | 6.202  | 6.485  | 6.480  | 6.766  | 0.498 | 0.606 |
| 4.345 | 5.167  | 4.327  | 4.698  | 4.428  | 0.589 | 0.606 |
| 3.907 | 5.489  | 3.720  | 5.758  | 4.861  | 0.513 | 0.606 |

|       |       |       |       |       |       |       |
|-------|-------|-------|-------|-------|-------|-------|
| 7.738 | 8.208 | 7.689 | 8.513 | 8.242 | 0.366 | 0.606 |
| 7.231 | 7.507 | 7.015 | 7.971 | 7.771 | 0.348 | 0.606 |
| 6.361 | 5.595 | 6.769 | 5.367 | 5.482 | 0.480 | 0.606 |
| 4.286 | 4.108 | 4.286 | 4.693 | 4.911 | 0.670 | 0.606 |
| 5.737 | 5.777 | 5.835 | 6.251 | 6.276 | 0.390 | 0.606 |
| 5.521 | 6.068 | 6.573 | 5.627 | 5.919 | 0.467 | 0.606 |
| 8.301 | 8.876 | 7.879 | 9.175 | 9.143 | 0.373 | 0.606 |
| 5.768 | 5.937 | 5.234 | 5.973 | 6.184 | 0.469 | 0.606 |
| 6.206 | 6.406 | 5.864 | 6.801 | 6.532 | 0.344 | 0.606 |
| 6.296 | 6.396 | 5.886 | 6.667 | 6.661 | 0.309 | 0.606 |
| 4.160 | 3.996 | 6.021 | 4.190 | 3.438 | 0.660 | 0.606 |
| 2.443 | 3.853 | 2.034 | 3.883 | 4.424 | 0.586 | 0.606 |
| 2.061 | 5.731 | 2.476 | 6.469 | 6.126 | 0.985 | 0.606 |
| 3.014 | 3.283 | 2.434 | 4.241 | 4.400 | 0.548 | 0.606 |
| 5.996 | 5.694 | 6.173 | 5.002 | 5.151 | 0.371 | 0.606 |
| 2.795 | 3.984 | 1.099 | 4.261 | 4.236 | 0.720 | 0.606 |
| 4.505 | 2.006 | 2.864 | 2.238 | 2.059 | 0.654 | 0.606 |
| 5.032 | 5.324 | 4.446 | 4.963 | 5.381 | 0.382 | 0.606 |
| 4.891 | 4.579 | 4.442 | 3.560 | 4.006 | 0.460 | 0.606 |
| 4.969 | 5.322 | 6.008 | 4.490 | 4.733 | 0.455 | 0.606 |
| 5.739 | 4.811 | 2.810 | 4.936 | 4.408 | 0.682 | 0.606 |
| 5.152 | 5.985 | 4.920 | 6.586 | 6.532 | 0.604 | 0.606 |
| 6.068 | 7.545 | 4.383 | 7.886 | 7.637 | 0.781 | 0.606 |
| 3.842 | 5.233 | 3.464 | 4.878 | 5.161 | 0.823 | 0.606 |
| 3.680 | 4.277 | 4.801 | 4.141 | 4.334 | 0.354 | 0.606 |
| 3.750 | 4.502 | 4.045 | 3.402 | 3.382 | 0.563 | 0.606 |
| 3.089 | 4.242 | 2.152 | 4.348 | 4.702 | 0.550 | 0.606 |
| 4.956 | 5.462 | 6.112 | 5.999 | 5.916 | 0.389 | 0.606 |
| 7.350 | 7.631 | 7.081 | 7.597 | 8.009 | 0.360 | 0.606 |
| 5.914 | 5.994 | 6.097 | 5.999 | 6.532 | 0.407 | 0.606 |
| 7.864 | 6.505 | 8.905 | 5.512 | 5.849 | 0.682 | 0.606 |
| 5.587 | 5.471 | 3.192 | 5.169 | 5.249 | 0.709 | 0.606 |
| 5.510 | 6.119 | 5.475 | 6.050 | 6.348 | 0.399 | 0.606 |
| 5.554 | 4.934 | 5.370 | 4.250 | 4.941 | 0.453 | 0.606 |
| 6.610 | 6.695 | 6.462 | 7.042 | 7.004 | 0.313 | 0.606 |
| 4.601 | 4.702 | 5.796 | 4.210 | 4.944 | 0.448 | 0.606 |
| 5.760 | 5.726 | 7.022 | 3.611 | 3.978 | 0.709 | 0.606 |
| 3.969 | 6.091 | 4.818 | 5.074 | 5.128 | 0.512 | 0.606 |
| 6.986 | 8.004 | 6.483 | 7.910 | 8.084 | 0.441 | 0.606 |
| 5.546 | 5.698 | 4.120 | 6.080 | 5.622 | 0.486 | 0.606 |
| 3.099 | 2.545 | 3.464 | 2.538 | 2.784 | 0.565 | 0.606 |
| 4.763 | 5.308 | 4.143 | 5.784 | 5.287 | 0.418 | 0.606 |
| 5.976 | 5.414 | 5.027 | 5.720 | 5.705 | 0.394 | 0.606 |
| 2.706 | 2.252 | 3.019 | 2.257 | 1.987 | 0.536 | 0.606 |
| 4.993 | 5.307 | 4.815 | 5.341 | 5.297 | 0.392 | 0.606 |
| 8.885 | 8.802 | 7.847 | 8.756 | 9.105 | 0.404 | 0.606 |
| 4.679 | 4.894 | 5.256 | 4.126 | 4.419 | 0.397 | 0.606 |
| 3.228 | 3.497 | 2.702 | 4.846 | 4.504 | 0.509 | 0.606 |
| 7.054 | 6.957 | 6.821 | 5.412 | 6.160 | 0.520 | 0.606 |
| 4.238 | 2.319 | 2.311 | 1.734 | 3.730 | 0.668 | 0.606 |

|       |       |        |       |       |       |       |
|-------|-------|--------|-------|-------|-------|-------|
| 4.828 | 4.276 | 4.103  | 4.846 | 4.893 | 0.358 | 0.606 |
| 3.097 | 2.834 | 2.144  | 3.006 | 2.645 | 0.465 | 0.606 |
| 5.327 | 6.304 | 4.472  | 6.443 | 6.522 | 0.521 | 0.606 |
| 6.236 | 5.719 | 6.995  | 5.522 | 5.391 | 0.435 | 0.606 |
| 5.528 | 6.050 | 5.093  | 6.129 | 6.237 | 0.391 | 0.606 |
| 4.427 | 5.917 | 5.451  | 5.570 | 5.217 | 0.741 | 0.606 |
| 3.288 | 3.981 | 3.917  | 4.100 | 3.696 | 0.419 | 0.606 |
| 4.523 | 4.488 | 3.854  | 4.525 | 4.659 | 0.361 | 0.606 |
| 4.329 | 3.387 | 4.906  | 3.166 | 3.635 | 0.518 | 0.606 |
| 6.125 | 6.055 | 4.930  | 6.481 | 6.560 | 0.398 | 0.606 |
| 3.348 | 3.859 | 3.267  | 3.145 | 3.714 | 0.400 | 0.606 |
| 9.642 | 8.663 | 10.142 | 7.655 | 8.021 | 0.542 | 0.606 |
| 7.849 | 7.778 | 8.715  | 6.938 | 7.716 | 0.449 | 0.606 |
| 3.685 | 4.069 | 3.800  | 3.429 | 3.862 | 0.480 | 0.606 |
| 3.951 | 4.354 | 1.953  | 4.718 | 4.734 | 0.617 | 0.606 |
| 5.528 | 5.079 | 6.648  | 2.616 | 3.454 | 0.852 | 0.606 |
| 5.052 | 5.810 | 3.819  | 6.279 | 6.197 | 0.560 | 0.606 |
| 5.121 | 4.398 | 5.355  | 4.167 | 4.417 | 0.420 | 0.606 |
| 2.812 | 2.776 | 2.201  | 3.545 | 4.203 | 0.801 | 0.606 |
| 3.455 | 1.855 | 1.838  | 1.700 | 1.802 | 0.678 | 0.606 |
| 6.180 | 8.042 | 3.461  | 8.438 | 8.442 | 1.135 | 0.606 |
| 5.702 | 6.097 | 5.521  | 6.557 | 6.392 | 0.348 | 0.606 |
| 3.333 | 3.197 | 3.744  | 2.906 | 3.074 | 0.342 | 0.606 |
| 5.832 | 5.390 | 4.098  | 5.863 | 5.299 | 0.455 | 0.606 |
| 8.745 | 8.219 | 7.214  | 8.116 | 8.668 | 0.548 | 0.606 |
| 4.487 | 3.716 | 4.639  | 3.630 | 3.214 | 0.552 | 0.606 |
| 5.646 | 6.181 | 5.269  | 6.603 | 6.365 | 0.361 | 0.606 |
| 4.599 | 4.935 | 3.209  | 4.915 | 4.693 | 0.467 | 0.606 |
| 3.638 | 3.942 | 4.014  | 3.479 | 3.804 | 0.406 | 0.606 |
| 2.366 | 2.118 | 2.749  | 2.217 | 2.251 | 0.400 | 0.606 |
| 2.755 | 1.921 | 2.555  | 2.001 | 2.373 | 0.497 | 0.606 |
| 7.852 | 6.597 | 8.282  | 4.533 | 4.848 | 0.815 | 0.606 |
| 1.510 | 1.821 | 1.577  | 1.669 | 3.213 | 0.541 | 0.606 |
| 4.274 | 4.168 | 3.892  | 3.811 | 4.000 | 0.393 | 0.606 |
| 7.162 | 1.388 | 1.479  | 1.562 | 1.211 | 1.474 | 0.606 |
| 8.929 | 9.013 | 8.420  | 9.045 | 9.221 | 0.432 | 0.606 |
| 7.166 | 6.260 | 4.114  | 6.118 | 6.241 | 0.720 | 0.606 |
| 2.771 | 3.531 | 3.217  | 3.565 | 4.408 | 0.539 | 0.606 |
| 6.421 | 6.900 | 4.545  | 6.653 | 6.699 | 0.860 | 0.606 |
| 6.707 | 8.108 | 4.329  | 8.261 | 8.284 | 0.835 | 0.606 |
| 3.034 | 2.868 | 2.623  | 3.100 | 4.968 | 0.688 | 0.606 |
| 8.120 | 1.331 | 1.704  | 1.249 | 2.035 | 1.666 | 0.606 |
| 6.028 | 6.479 | 4.573  | 5.059 | 5.037 | 0.635 | 0.606 |
| 3.727 | 6.085 | 1.642  | 6.244 | 5.990 | 0.966 | 0.606 |
| 7.138 | 5.679 | 7.213  | 5.098 | 4.560 | 0.614 | 0.606 |
| 4.918 | 5.147 | 2.477  | 4.764 | 4.481 | 0.740 | 0.606 |
| 7.532 | 7.020 | 7.573  | 7.066 | 7.702 | 0.402 | 0.606 |
| 6.878 | 6.832 | 4.789  | 6.488 | 6.393 | 0.571 | 0.606 |
| 3.321 | 5.808 | 5.402  | 5.199 | 5.632 | 0.821 | 0.606 |
| 3.628 | 2.967 | 1.479  | 3.039 | 2.370 | 0.492 | 0.606 |

|       |       |       |        |        |       |       |
|-------|-------|-------|--------|--------|-------|-------|
| 7.461 | 8.040 | 7.954 | 7.558  | 7.606  | 0.485 | 0.606 |
| 4.867 | 4.822 | 3.865 | 4.960  | 4.988  | 0.434 | 0.606 |
| 2.480 | 1.793 | 2.284 | 1.540  | 1.818  | 0.453 | 0.606 |
| 3.692 | 4.699 | 3.087 | 5.257  | 4.998  | 0.620 | 0.606 |
| 5.161 | 5.670 | 3.961 | 5.932  | 5.945  | 0.485 | 0.606 |
| 5.790 | 7.946 | 4.757 | 8.157  | 7.810  | 0.840 | 0.606 |
| 4.197 | 3.688 | 3.029 | 4.595  | 4.289  | 0.440 | 0.606 |
| 4.248 | 4.668 | 4.515 | 3.629  | 3.737  | 0.370 | 0.606 |
| 5.676 | 5.626 | 4.044 | 5.573  | 5.931  | 0.472 | 0.606 |
| 2.643 | 2.733 | 1.532 | 3.034  | 2.996  | 0.496 | 0.606 |
| 7.070 | 7.251 | 7.801 | 6.601  | 6.699  | 0.410 | 0.606 |
| 3.541 | 3.710 | 1.902 | 3.982  | 3.128  | 0.515 | 0.606 |
| 9.325 | 9.900 | 8.246 | 10.219 | 10.151 | 0.494 | 0.606 |
| 6.682 | 6.266 | 3.628 | 7.000  | 6.681  | 0.695 | 0.606 |
| 7.507 | 7.105 | 5.368 | 7.673  | 7.481  | 0.543 | 0.606 |
| 4.721 | 5.341 | 3.660 | 6.266  | 5.822  | 0.638 | 0.606 |
| 7.130 | 6.971 | 7.736 | 5.626  | 6.000  | 0.515 | 0.606 |
| 6.251 | 6.817 | 5.464 | 7.251  | 7.315  | 0.467 | 0.606 |
| 6.890 | 5.799 | 7.640 | 4.831  | 5.682  | 0.550 | 0.606 |
| 4.286 | 6.468 | 5.724 | 5.897  | 6.290  | 0.561 | 0.606 |
| 3.350 | 3.622 | 3.332 | 3.284  | 4.884  | 0.480 | 0.606 |
| 5.315 | 4.859 | 5.661 | 3.777  | 4.658  | 0.483 | 0.606 |
| 6.921 | 5.802 | 7.258 | 5.696  | 5.641  | 0.414 | 0.606 |
| 4.133 | 5.317 | 4.008 | 4.737  | 4.631  | 0.567 | 0.606 |
| 2.067 | 3.221 | 1.886 | 4.060  | 3.996  | 0.696 | 0.606 |
| 2.974 | 1.581 | 3.301 | 1.974  | 1.559  | 0.664 | 0.606 |
| 4.082 | 3.635 | 4.512 | 3.300  | 4.281  | 0.382 | 0.606 |
| 1.726 | 2.113 | 1.987 | 1.796  | 2.190  | 0.414 | 0.606 |
| 5.702 | 5.962 | 6.976 | 5.126  | 5.587  | 0.544 | 0.606 |
| 5.333 | 6.409 | 4.413 | 6.406  | 6.293  | 0.547 | 0.606 |
| 6.648 | 6.420 | 3.620 | 6.941  | 6.826  | 0.755 | 0.606 |
| 4.266 | 3.502 | 1.895 | 4.006  | 4.293  | 0.606 | 0.606 |
| 6.503 | 5.752 | 3.683 | 5.711  | 5.704  | 0.613 | 0.606 |
| 6.915 | 7.503 | 7.570 | 7.783  | 7.760  | 0.483 | 0.606 |
| 5.558 | 6.637 | 4.613 | 6.973  | 7.164  | 0.663 | 0.606 |
| 3.675 | 5.347 | 2.300 | 5.957  | 5.663  | 0.844 | 0.606 |
| 5.207 | 5.907 | 4.840 | 6.277  | 6.878  | 0.488 | 0.606 |
| 4.613 | 5.328 | 3.706 | 5.607  | 5.809  | 0.555 | 0.606 |
| 2.296 | 2.730 | 1.887 | 3.400  | 2.300  | 0.602 | 0.606 |
| 1.992 | 3.933 | 2.426 | 3.307  | 4.826  | 1.357 | 0.606 |
| 5.586 | 6.133 | 5.923 | 6.375  | 6.396  | 0.319 | 0.606 |
| 7.863 | 7.492 | 8.443 | 6.751  | 6.886  | 0.469 | 0.606 |
| 4.388 | 2.179 | 3.229 | 1.303  | 1.705  | 0.685 | 0.606 |
| 6.302 | 6.317 | 7.382 | 5.231  | 5.846  | 0.508 | 0.606 |
| 3.225 | 3.606 | 2.534 | 3.605  | 3.621  | 0.540 | 0.606 |
| 6.428 | 6.603 | 6.041 | 7.015  | 6.872  | 0.305 | 0.606 |
| 4.432 | 3.269 | 3.698 | 3.850  | 3.735  | 0.448 | 0.606 |
| 4.923 | 4.247 | 4.361 | 3.672  | 4.258  | 0.390 | 0.606 |
| 7.266 | 7.813 | 7.606 | 7.906  | 7.859  | 0.351 | 0.606 |
| 6.585 | 5.655 | 2.678 | 6.340  | 5.603  | 0.853 | 0.606 |



|        |        |       |        |        |       |       |
|--------|--------|-------|--------|--------|-------|-------|
| 3.468  | 2.325  | 1.266 | 2.950  | 2.678  | 0.549 | 0.606 |
| 1.746  | 3.254  | 2.116 | 3.123  | 3.533  | 0.618 | 0.606 |
| 3.895  | 4.421  | 3.978 | 4.707  | 3.802  | 0.467 | 0.606 |
| 3.158  | 2.840  | 4.417 | 2.200  | 1.321  | 0.662 | 0.606 |
| 3.881  | 3.232  | 5.731 | 2.358  | 2.551  | 0.665 | 0.606 |
| 4.688  | 5.452  | 4.924 | 5.420  | 5.786  | 0.371 | 0.606 |
| 3.140  | 4.389  | 2.292 | 4.482  | 4.395  | 0.551 | 0.606 |
| 4.439  | 4.035  | 4.570 | 4.375  | 3.973  | 0.381 | 0.606 |
| 5.974  | 5.028  | 6.766 | 4.815  | 4.706  | 0.584 | 0.606 |
| 6.170  | 5.714  | 6.269 | 5.594  | 5.747  | 0.452 | 0.606 |
| 2.989  | 4.026  | 2.958 | 5.012  | 4.585  | 0.476 | 0.606 |
| 6.989  | 7.073  | 4.975 | 7.611  | 7.946  | 0.572 | 0.606 |
| 4.806  | 4.666  | 3.683 | 5.277  | 4.713  | 0.371 | 0.606 |
| 5.225  | 4.514  | 4.785 | 4.933  | 4.887  | 0.421 | 0.606 |
| 2.450  | 3.400  | 2.851 | 2.577  | 1.736  | 0.436 | 0.606 |
| 2.850  | 4.080  | 4.256 | 5.024  | 5.164  | 0.549 | 0.606 |
| 4.828  | 5.479  | 3.771 | 5.673  | 5.252  | 0.460 | 0.606 |
| 7.514  | 7.044  | 8.500 | 6.682  | 7.012  | 0.400 | 0.606 |
| 10.707 | 11.647 | 7.799 | 11.804 | 11.649 | 1.005 | 0.606 |
| 1.854  | 2.286  | 1.849 | 3.072  | 2.957  | 0.402 | 0.606 |
| 3.529  | 4.355  | 3.781 | 4.593  | 4.505  | 0.335 | 0.606 |
| 8.024  | 8.605  | 5.687 | 8.902  | 8.792  | 0.702 | 0.606 |
| 4.953  | 4.850  | 4.412 | 4.788  | 4.667  | 0.664 | 0.606 |
| 4.971  | 4.419  | 4.087 | 4.355  | 3.681  | 0.718 | 0.606 |
| 5.747  | 5.191  | 5.033 | 5.309  | 4.904  | 0.933 | 0.606 |
| 4.659  | 4.080  | 3.984 | 4.152  | 3.773  | 0.646 | 0.606 |
| 3.767  | 3.124  | 3.299 | 3.725  | 3.179  | 0.586 | 0.606 |
| 4.199  | 2.409  | 3.483 | 4.835  | 2.337  | 1.004 | 0.606 |
| 4.511  | 3.481  | 4.058 | 3.629  | 3.986  | 0.378 | 0.606 |
| 3.121  | 3.159  | 2.732 | 2.704  | 2.262  | 0.406 | 0.606 |
| 2.094  | 1.430  | 1.222 | 2.305  | 1.377  | 0.751 | 0.606 |
| 6.737  | 7.105  | 6.483 | 7.523  | 7.215  | 0.329 | 0.606 |
| 3.534  | 3.148  | 3.371 | 3.600  | 4.188  | 0.441 | 0.606 |
| 7.171  | 8.343  | 4.505 | 8.467  | 8.587  | 0.913 | 0.606 |
| 7.530  | 5.823  | 4.090 | 6.303  | 6.360  | 0.711 | 0.606 |
| 3.833  | 4.476  | 4.819 | 4.357  | 4.178  | 0.502 | 0.606 |
| 4.138  | 3.972  | 4.097 | 4.329  | 4.064  | 0.392 | 0.606 |
| 3.873  | 4.192  | 4.181 | 3.611  | 3.704  | 0.543 | 0.606 |
| 3.530  | 4.292  | 4.097 | 3.820  | 3.832  | 0.428 | 0.606 |
| 4.004  | 3.106  | 4.933 | 1.713  | 2.936  | 0.611 | 0.606 |
| 7.338  | 5.617  | 3.602 | 5.272  | 6.296  | 0.849 | 0.606 |
| 4.013  | 3.942  | 4.381 | 4.081  | 3.911  | 0.358 | 0.606 |
| 7.629  | 8.557  | 7.142 | 8.536  | 8.687  | 0.449 | 0.606 |
| 5.887  | 5.413  | 6.449 | 5.233  | 5.425  | 0.525 | 0.606 |
| 8.879  | 8.200  | 9.228 | 8.283  | 9.408  | 0.518 | 0.606 |
| 3.897  | 3.666  | 3.825 | 2.808  | 3.239  | 0.551 | 0.606 |
| 4.613  | 4.070  | 4.784 | 3.800  | 4.530  | 0.728 | 0.606 |
| 5.326  | 5.119  | 7.153 | 5.689  | 6.049  | 0.652 | 0.606 |
| 6.469  | 5.759  | 5.962 | 6.310  | 5.812  | 0.555 | 0.606 |
| 3.753  | 3.344  | 4.049 | 3.766  | 3.546  | 0.391 | 0.606 |

|        |        |        |        |        |       |       |
|--------|--------|--------|--------|--------|-------|-------|
| 3.874  | 3.784  | 4.923  | 3.913  | 3.584  | 0.556 | 0.606 |
| 5.900  | 6.201  | 6.091  | 6.105  | 6.032  | 0.330 | 0.606 |
| 9.174  | 8.562  | 9.157  | 8.574  | 8.458  | 0.412 | 0.606 |
| 8.837  | 7.793  | 8.570  | 7.787  | 7.749  | 0.478 | 0.606 |
| 5.457  | 5.094  | 5.240  | 4.833  | 4.796  | 0.434 | 0.606 |
| 3.301  | 4.389  | 4.029  | 3.992  | 3.989  | 0.422 | 0.606 |
| 3.416  | 3.904  | 3.699  | 3.626  | 3.362  | 0.483 | 0.606 |
| 2.724  | 1.395  | 2.228  | 2.115  | 2.055  | 0.764 | 0.606 |
| 3.039  | 1.325  | 2.901  | 1.608  | 1.839  | 0.509 | 0.606 |
| 8.908  | 7.389  | 8.380  | 7.073  | 6.260  | 0.636 | 0.606 |
| 9.001  | 8.830  | 9.300  | 8.693  | 8.569  | 0.322 | 0.606 |
| 5.465  | 3.247  | 2.875  | 3.570  | 3.443  | 0.826 | 0.606 |
| 3.356  | 3.213  | 3.431  | 2.048  | 2.680  | 0.537 | 0.606 |
| 2.477  | 1.868  | 1.759  | 2.315  | 2.889  | 0.548 | 0.606 |
| 8.509  | 7.460  | 7.869  | 7.292  | 7.476  | 0.429 | 0.606 |
| 4.845  | 4.178  | 4.831  | 3.751  | 3.461  | 0.559 | 0.606 |
| 3.998  | 2.782  | 3.429  | 1.941  | 1.579  | 0.774 | 0.606 |
| 9.437  | 6.250  | 8.549  | 6.179  | 6.829  | 0.838 | 0.606 |
| 8.814  | 6.765  | 7.016  | 6.661  | 6.613  | 0.628 | 0.606 |
| 7.485  | 6.278  | 6.858  | 6.613  | 5.482  | 0.636 | 0.606 |
| 10.939 | 10.502 | 11.193 | 10.057 | 10.135 | 0.328 | 0.606 |
| 10.726 | 11.033 | 11.064 | 10.433 | 10.491 | 0.296 | 0.606 |
| 9.662  | 7.972  | 9.415  | 8.171  | 7.629  | 0.595 | 0.606 |
| 5.040  | 4.058  | 4.859  | 3.590  | 4.004  | 0.405 | 0.606 |
| 8.505  | 7.798  | 8.693  | 8.043  | 8.442  | 0.393 | 0.606 |
| 6.047  | 6.476  | 6.548  | 6.095  | 5.920  | 0.330 | 0.606 |
| 5.710  | 5.487  | 5.497  | 4.778  | 4.821  | 0.472 | 0.606 |
| 4.418  | 3.706  | 4.390  | 4.251  | 3.354  | 0.458 | 0.606 |
| 8.818  | 8.253  | 8.777  | 7.803  | 7.218  | 0.535 | 0.606 |
| 6.300  | 6.302  | 6.688  | 5.663  | 6.013  | 0.393 | 0.606 |
| 6.514  | 6.163  | 6.558  | 6.475  | 6.172  | 0.319 | 0.606 |
| 3.440  | 2.694  | 2.936  | 3.279  | 3.626  | 0.465 | 0.606 |
| 9.846  | 9.414  | 9.569  | 9.267  | 9.322  | 0.320 | 0.606 |
| 3.091  | 1.864  | 3.862  | 2.785  | 2.296  | 0.543 | 0.606 |
| 2.232  | 3.088  | 3.761  | 3.144  | 2.055  | 0.462 | 0.606 |
| 3.820  | 1.620  | 4.334  | 1.422  | 2.501  | 0.792 | 0.606 |
| 3.653  | 4.040  | 3.886  | 2.281  | 3.530  | 0.534 | 0.606 |
| 5.266  | 5.009  | 5.810  | 4.920  | 5.539  | 0.350 | 0.606 |
| 7.762  | 7.795  | 7.889  | 6.829  | 6.746  | 0.482 | 0.606 |
| 5.752  | 5.083  | 5.896  | 4.949  | 5.235  | 0.385 | 0.606 |
| 6.099  | 5.307  | 5.931  | 5.453  | 5.577  | 0.453 | 0.606 |
| 6.059  | 5.820  | 6.780  | 6.349  | 5.847  | 0.636 | 0.606 |
| 3.362  | 3.315  | 3.068  | 3.261  | 2.196  | 0.440 | 0.606 |
| 6.631  | 4.713  | 6.395  | 5.742  | 4.394  | 0.785 | 0.606 |
| 10.150 | 8.551  | 8.600  | 8.865  | 7.938  | 0.813 | 0.606 |
| 8.292  | 8.391  | 8.349  | 7.646  | 7.583  | 0.363 | 0.606 |
| 6.218  | 4.795  | 5.822  | 4.942  | 4.299  | 0.558 | 0.606 |
| 3.937  | 3.656  | 4.053  | 3.833  | 3.788  | 0.386 | 0.606 |
| 2.664  | 2.900  | 3.714  | 3.173  | 2.646  | 0.500 | 0.606 |
| 5.988  | 7.160  | 7.284  | 6.036  | 6.037  | 0.477 | 0.606 |

|        |        |       |        |        |       |       |
|--------|--------|-------|--------|--------|-------|-------|
| 5.610  | 5.330  | 6.140 | 4.828  | 5.277  | 0.433 | 0.606 |
| 3.916  | 3.122  | 3.534 | 3.111  | 3.952  | 0.484 | 0.606 |
| 6.771  | 5.423  | 6.321 | 5.727  | 5.305  | 0.573 | 0.606 |
| 4.718  | 4.922  | 4.902 | 5.072  | 4.836  | 0.316 | 0.606 |
| 5.534  | 5.178  | 6.034 | 5.106  | 5.044  | 0.333 | 0.606 |
| 8.052  | 7.883  | 8.406 | 7.405  | 7.480  | 0.363 | 0.606 |
| 9.817  | 8.705  | 9.136 | 9.284  | 9.348  | 0.630 | 0.606 |
| 3.195  | 2.656  | 3.680 | 2.426  | 3.326  | 0.432 | 0.606 |
| 6.149  | 5.667  | 6.790 | 5.171  | 5.209  | 0.494 | 0.606 |
| 6.485  | 6.729  | 4.753 | 7.101  | 6.802  | 0.667 | 0.606 |
| 5.471  | 5.068  | 6.547 | 4.977  | 5.221  | 0.433 | 0.606 |
| 6.296  | 4.925  | 2.074 | 4.788  | 6.102  | 1.031 | 0.606 |
| 5.140  | 4.117  | 2.137 | 4.503  | 4.952  | 0.769 | 0.606 |
| 6.981  | 5.962  | 4.010 | 6.212  | 6.260  | 0.707 | 0.606 |
| 2.835  | 2.344  | 1.391 | 2.426  | 3.015  | 0.542 | 0.606 |
| 4.182  | 4.085  | 2.075 | 3.445  | 5.025  | 0.960 | 0.606 |
| 3.980  | 4.936  | 2.146 | 4.915  | 4.511  | 0.704 | 0.606 |
| 9.324  | 9.023  | 6.129 | 9.178  | 9.720  | 0.877 | 0.606 |
| 3.482  | 1.952  | 0.934 | 1.973  | 2.149  | 0.720 | 0.606 |
| 4.360  | 3.201  | 1.375 | 3.816  | 4.407  | 0.911 | 0.606 |
| 9.479  | 9.663  | 7.153 | 9.886  | 9.830  | 0.682 | 0.606 |
| 5.024  | 2.069  | 1.028 | 2.945  | 3.896  | 0.878 | 0.606 |
| 6.373  | 5.664  | 3.293 | 5.736  | 5.704  | 0.659 | 0.606 |
| 5.729  | 5.895  | 2.905 | 5.980  | 5.798  | 0.787 | 0.606 |
| 5.522  | 2.769  | 1.984 | 4.836  | 5.196  | 0.969 | 0.606 |
| 5.145  | 4.838  | 1.734 | 4.613  | 5.195  | 0.860 | 0.606 |
| 5.075  | 3.830  | 1.314 | 4.443  | 4.664  | 0.958 | 0.606 |
| 4.926  | 4.467  | 1.001 | 4.615  | 5.735  | 1.310 | 0.606 |
| 6.463  | 6.519  | 3.188 | 6.550  | 6.645  | 0.825 | 0.606 |
| 5.243  | 5.730  | 2.196 | 6.075  | 5.628  | 0.851 | 0.606 |
| 3.419  | 2.303  | 0.707 | 3.704  | 3.618  | 0.816 | 0.606 |
| 4.525  | 5.753  | 0.809 | 5.666  | 5.718  | 1.211 | 0.606 |
| 5.328  | 5.603  | 1.995 | 5.999  | 5.514  | 0.949 | 0.606 |
| 4.015  | 4.294  | 4.544 | 4.910  | 3.684  | 0.463 | 0.606 |
| 7.034  | 7.479  | 3.343 | 7.762  | 7.865  | 0.992 | 0.606 |
| 9.513  | 9.609  | 6.709 | 9.594  | 9.754  | 0.753 | 0.606 |
| 4.468  | 3.151  | 1.505 | 3.140  | 4.035  | 0.815 | 0.606 |
| 4.877  | 3.188  | 1.777 | 3.022  | 3.985  | 0.874 | 0.606 |
| 2.693  | 2.765  | 1.288 | 1.303  | 2.151  | 0.644 | 0.606 |
| 2.959  | 2.015  | 1.419 | 4.475  | 2.654  | 0.997 | 0.606 |
| 4.598  | 3.701  | 1.935 | 3.069  | 4.123  | 0.906 | 0.606 |
| 5.742  | 5.884  | 1.383 | 6.088  | 6.153  | 1.050 | 0.606 |
| 11.030 | 10.869 | 9.154 | 10.852 | 11.051 | 0.494 | 0.606 |
| 5.465  | 6.456  | 2.537 | 6.395  | 6.232  | 0.875 | 0.606 |
| 4.034  | 4.461  | 2.164 | 4.825  | 4.507  | 0.658 | 0.606 |
| 10.416 | 10.339 | 7.945 | 10.317 | 10.521 | 0.624 | 0.606 |
| 11.038 | 10.913 | 8.714 | 10.741 | 10.949 | 0.581 | 0.606 |
| 2.568  | 2.770  | 1.909 | 2.774  | 3.141  | 0.589 | 0.606 |
| 8.373  | 8.509  | 6.350 | 8.285  | 8.477  | 0.698 | 0.606 |
| 8.104  | 7.777  | 5.842 | 7.772  | 7.688  | 0.736 | 0.606 |

|        |        |       |        |        |       |       |
|--------|--------|-------|--------|--------|-------|-------|
| 3.679  | 4.151  | 1.191 | 2.248  | 4.795  | 0.896 | 0.606 |
| 8.906  | 8.756  | 5.960 | 8.983  | 9.121  | 0.980 | 0.606 |
| 7.344  | 7.317  | 4.661 | 7.161  | 7.500  | 0.763 | 0.606 |
| 5.340  | 5.809  | 2.421 | 6.069  | 5.476  | 0.883 | 0.606 |
| 5.283  | 5.750  | 2.002 | 6.012  | 5.862  | 0.930 | 0.606 |
| 11.564 | 11.480 | 9.604 | 11.511 | 11.650 | 0.513 | 0.606 |
| 4.390  | 4.718  | 2.248 | 4.867  | 5.181  | 0.727 | 0.606 |
| 2.415  | 2.746  | 1.039 | 2.756  | 3.044  | 0.631 | 0.606 |
| 11.062 | 10.916 | 8.647 | 11.004 | 11.224 | 0.594 | 0.606 |
| 5.581  | 4.189  | 1.868 | 4.208  | 5.035  | 0.938 | 0.606 |
| 11.476 | 11.305 | 9.413 | 11.301 | 11.482 | 0.519 | 0.606 |
| 11.456 | 11.296 | 9.389 | 11.296 | 11.495 | 0.527 | 0.606 |
| 11.378 | 11.250 | 9.512 | 11.242 | 11.343 | 0.483 | 0.606 |
| 2.572  | 3.384  | 1.360 | 1.976  | 3.495  | 0.661 | 0.606 |
| 8.214  | 8.047  | 7.448 | 8.194  | 7.804  | 0.474 | 0.606 |
| 9.889  | 9.334  | 9.182 | 9.239  | 9.289  | 0.415 | 0.606 |
| 2.253  | 2.030  | 1.965 | 2.005  | 1.824  | 0.531 | 0.606 |
| 7.573  | 7.768  | 7.027 | 7.078  | 7.221  | 0.412 | 0.606 |
| 7.721  | 3.040  | 5.882 | 6.761  | 6.906  | 1.159 | 0.606 |
| 5.048  | 5.026  | 4.140 | 5.089  | 4.993  | 0.518 | 0.606 |
| 4.555  | 4.139  | 3.280 | 4.901  | 4.721  | 0.609 | 0.606 |
| 6.410  | 6.520  | 5.571 | 6.970  | 6.802  | 0.567 | 0.606 |
| 5.297  | 5.791  | 4.361 | 5.277  | 5.346  | 0.620 | 0.606 |
| 7.243  | 7.148  | 6.390 | 7.641  | 7.553  | 0.564 | 0.606 |
| 6.768  | 6.145  | 5.142 | 6.545  | 6.917  | 0.608 | 0.606 |
| 8.310  | 8.122  | 8.403 | 7.722  | 7.832  | 0.305 | 0.606 |
| 8.407  | 8.338  | 8.562 | 7.923  | 7.967  | 0.304 | 0.606 |
| 6.095  | 5.402  | 6.079 | 5.578  | 5.258  | 0.396 | 0.606 |
| 4.452  | 4.817  | 6.097 | 3.328  | 2.362  | 0.734 | 0.606 |
| 2.520  | 2.238  | 3.656 | 2.353  | 2.645  | 0.470 | 0.606 |
| 2.851  | 2.128  | 3.825 | 2.177  | 2.831  | 0.603 | 0.606 |
| 2.864  | 2.872  | 3.170 | 3.108  | 2.592  | 0.485 | 0.606 |
| 4.781  | 5.006  | 5.028 | 4.217  | 5.116  | 0.416 | 0.606 |
| 3.568  | 3.865  | 4.494 | 3.153  | 3.139  | 0.419 | 0.606 |
| 5.695  | 4.107  | 5.919 | 4.690  | 4.685  | 0.570 | 0.606 |
| 6.905  | 7.158  | 6.026 | 5.681  | 6.853  | 0.432 | 0.606 |
| 3.887  | 5.006  | 4.902 | 3.463  | 4.501  | 0.553 | 0.606 |
| 4.858  | 3.704  | 4.856 | 4.359  | 4.100  | 0.622 | 0.606 |
| 9.191  | 8.931  | 9.054 | 8.438  | 8.326  | 0.332 | 0.606 |
| 7.434  | 6.943  | 7.860 | 6.620  | 6.020  | 0.491 | 0.606 |
| 1.444  | 2.791  | 3.741 | 1.639  | 2.817  | 0.623 | 0.606 |
| 3.642  | 4.623  | 4.859 | 3.342  | 4.811  | 0.655 | 0.606 |
| 5.754  | 5.632  | 5.748 | 5.368  | 5.440  | 0.404 | 0.606 |
| 1.945  | 1.343  | 2.242 | 1.349  | 1.400  | 0.446 | 0.606 |
| 3.307  | 1.608  | 1.338 | 2.972  | 2.187  | 0.628 | 0.606 |
| 3.850  | 4.070  | 4.151 | 3.972  | 4.105  | 0.426 | 0.606 |
| 4.710  | 4.356  | 5.328 | 4.422  | 4.340  | 0.374 | 0.606 |
| 4.222  | 4.534  | 3.253 | 3.106  | 4.109  | 0.537 | 0.606 |
| 8.142  | 8.379  | 8.312 | 8.299  | 6.839  | 0.490 | 0.606 |
| 5.783  | 5.568  | 5.487 | 5.137  | 5.512  | 0.368 | 0.606 |

|        |        |        |        |        |       |       |
|--------|--------|--------|--------|--------|-------|-------|
| 9.047  | 8.799  | 9.114  | 8.781  | 8.809  | 0.297 | 0.606 |
| 5.473  | 4.953  | 6.004  | 5.448  | 5.018  | 0.351 | 0.606 |
| 5.590  | 4.197  | 4.494  | 3.445  | 4.699  | 0.476 | 0.606 |
| 2.008  | 1.738  | 1.923  | 1.210  | 2.125  | 0.647 | 0.606 |
| 4.182  | 4.343  | 4.599  | 3.760  | 4.626  | 0.395 | 0.606 |
| 5.712  | 5.355  | 6.433  | 4.678  | 5.146  | 0.409 | 0.606 |
| 4.197  | 3.921  | 3.498  | 3.309  | 3.777  | 0.458 | 0.606 |
| 6.798  | 6.389  | 6.478  | 6.182  | 6.257  | 0.345 | 0.606 |
| 9.044  | 8.364  | 9.027  | 8.065  | 7.790  | 0.370 | 0.606 |
| 5.367  | 4.905  | 5.434  | 4.764  | 4.679  | 0.560 | 0.606 |
| 5.363  | 5.719  | 5.112  | 5.172  | 5.557  | 0.512 | 0.606 |
| 5.081  | 4.881  | 4.711  | 5.056  | 4.577  | 0.404 | 0.606 |
| 2.464  | 2.561  | 3.923  | 3.015  | 2.832  | 0.460 | 0.606 |
| 2.831  | 2.897  | 2.012  | 2.679  | 3.065  | 0.403 | 0.606 |
| 11.149 | 11.066 | 11.359 | 9.392  | 10.766 | 0.429 | 0.606 |
| 1.986  | 1.964  | 3.826  | 1.943  | 2.625  | 0.609 | 0.606 |
| 8.483  | 8.707  | 8.858  | 7.870  | 7.784  | 0.411 | 0.606 |
| 2.361  | 2.288  | 1.818  | 1.159  | 1.710  | 0.542 | 0.606 |
| 2.230  | 2.500  | 2.328  | 1.864  | 2.386  | 0.494 | 0.606 |
| 4.770  | 4.572  | 5.571  | 4.320  | 4.425  | 0.518 | 0.606 |
| 3.652  | 3.868  | 3.675  | 3.279  | 3.806  | 0.468 | 0.606 |
| 3.151  | 2.572  | 2.661  | 1.538  | 2.133  | 0.416 | 0.606 |
| 8.218  | 8.047  | 7.697  | 7.808  | 7.895  | 0.364 | 0.606 |
| 6.460  | 6.069  | 6.022  | 5.970  | 6.173  | 0.410 | 0.606 |
| 3.395  | 3.035  | 2.318  | 3.878  | 3.236  | 0.548 | 0.606 |
| 7.511  | 7.567  | 7.838  | 7.260  | 6.705  | 0.381 | 0.606 |
| 4.718  | 4.298  | 4.757  | 3.846  | 4.387  | 0.462 | 0.606 |
| 8.368  | 8.031  | 8.229  | 7.600  | 7.593  | 0.356 | 0.606 |
| 2.332  | 2.075  | 2.342  | 3.130  | 2.342  | 0.499 | 0.606 |
| 1.983  | 2.090  | 2.029  | 1.983  | 1.025  | 0.517 | 0.606 |
| 6.384  | 7.353  | 3.411  | 7.530  | 6.893  | 0.803 | 0.606 |
| 5.889  | 5.518  | 3.362  | 5.766  | 5.912  | 0.636 | 0.606 |
| 9.739  | 9.594  | 9.207  | 10.423 | 10.383 | 0.431 | 0.606 |
| 6.238  | 6.080  | 6.391  | 6.268  | 6.225  | 0.451 | 0.606 |
| 5.551  | 6.843  | 6.424  | 7.097  | 7.075  | 0.471 | 0.606 |
| 5.642  | 6.972  | 5.522  | 7.472  | 7.276  | 0.658 | 0.606 |
| 7.280  | 6.812  | 5.643  | 7.669  | 7.704  | 0.591 | 0.606 |
| 6.531  | 5.645  | 6.719  | 5.321  | 5.660  | 0.391 | 0.606 |
| 5.113  | 5.452  | 2.644  | 6.136  | 5.788  | 0.664 | 0.606 |
| 4.706  | 4.067  | 4.019  | 4.744  | 4.257  | 0.402 | 0.606 |
| 4.933  | 4.011  | 5.520  | 3.984  | 4.171  | 0.454 | 0.606 |
| 2.023  | 2.765  | 2.386  | 1.801  | 1.684  | 0.537 | 0.606 |
| 4.932  | 3.771  | 5.134  | 3.490  | 3.549  | 0.531 | 0.606 |
| 7.642  | 6.761  | 7.973  | 6.422  | 6.886  | 0.483 | 0.606 |
| 3.253  | 4.735  | 1.738  | 4.246  | 4.586  | 0.687 | 0.606 |
| 4.705  | 5.037  | 4.503  | 5.016  | 4.355  | 0.338 | 0.606 |
| 6.403  | 6.786  | 6.560  | 6.545  | 6.747  | 0.475 | 0.606 |
| 5.920  | 5.832  | 6.332  | 5.677  | 5.875  | 0.405 | 0.606 |
| 6.576  | 6.816  | 6.506  | 6.960  | 7.232  | 0.336 | 0.606 |
| 4.436  | 6.823  | 5.253  | 4.670  | 4.839  | 0.866 | 0.606 |

|       |       |       |       |       |       |       |
|-------|-------|-------|-------|-------|-------|-------|
| 5.894 | 5.236 | 6.610 | 5.646 | 5.674 | 0.410 | 0.606 |
| 5.834 | 7.024 | 6.447 | 7.232 | 6.833 | 0.374 | 0.606 |
| 3.550 | 4.324 | 3.757 | 3.369 | 3.482 | 0.518 | 0.606 |
| 3.984 | 3.972 | 3.359 | 2.494 | 4.361 | 0.470 | 0.606 |
| 6.144 | 6.545 | 5.768 | 7.080 | 6.816 | 0.414 | 0.606 |
| 2.256 | 4.026 | 2.129 | 3.202 | 3.407 | 0.481 | 0.606 |
| 5.409 | 6.130 | 3.839 | 6.666 | 6.452 | 0.619 | 0.606 |
| 4.314 | 6.187 | 3.685 | 6.381 | 6.439 | 0.705 | 0.606 |
| 5.682 | 5.929 | 4.997 | 6.189 | 6.178 | 0.429 | 0.606 |
| 2.786 | 1.981 | 3.708 | 3.951 | 2.776 | 0.634 | 0.606 |
| 2.474 | 4.372 | 2.050 | 4.471 | 4.407 | 0.649 | 0.606 |
| 4.141 | 5.867 | 4.933 | 6.408 | 5.902 | 0.603 | 0.606 |
| 2.595 | 4.962 | 2.485 | 4.912 | 5.233 | 0.703 | 0.606 |
| 3.108 | 2.885 | 3.457 | 1.778 | 2.485 | 0.433 | 0.606 |
| 1.785 | 2.834 | 2.777 | 3.801 | 3.852 | 0.511 | 0.606 |
| 5.803 | 5.891 | 6.667 | 4.439 | 4.331 | 0.521 | 0.606 |
| 4.644 | 3.797 | 4.028 | 3.792 | 4.132 | 0.363 | 0.606 |
| 3.163 | 2.363 | 2.487 | 2.144 | 2.235 | 0.540 | 0.606 |
| 4.453 | 3.789 | 5.303 | 3.568 | 3.892 | 0.440 | 0.606 |
| 4.748 | 5.363 | 4.431 | 5.626 | 5.726 | 0.385 | 0.606 |
| 6.512 | 5.510 | 7.145 | 5.438 | 5.185 | 0.535 | 0.606 |
| 7.915 | 7.606 | 7.727 | 7.705 | 8.111 | 0.376 | 0.606 |
| 2.756 | 2.622 | 3.196 | 2.150 | 2.330 | 0.474 | 0.606 |
| 6.869 | 6.650 | 7.086 | 6.098 | 6.402 | 0.341 | 0.606 |
| 4.512 | 4.393 | 4.707 | 3.625 | 4.452 | 0.434 | 0.606 |
| 4.844 | 5.000 | 5.797 | 3.463 | 4.448 | 0.526 | 0.606 |
| 3.489 | 4.050 | 3.051 | 4.882 | 4.333 | 0.488 | 0.606 |
| 3.200 | 1.392 | 0.847 | 1.286 | 1.282 | 0.693 | 0.606 |
| 3.498 | 4.025 | 2.513 | 4.516 | 3.639 | 0.511 | 0.606 |
| 3.404 | 2.025 | 2.277 | 2.537 | 1.980 | 0.619 | 0.606 |
| 3.394 | 2.686 | 2.982 | 2.138 | 2.148 | 0.500 | 0.606 |
| 7.484 | 5.408 | 6.703 | 5.333 | 6.067 | 0.526 | 0.606 |
| 6.449 | 5.923 | 7.168 | 4.886 | 5.489 | 0.508 | 0.606 |
| 3.692 | 3.791 | 4.173 | 2.854 | 2.972 | 0.455 | 0.606 |
| 2.863 | 1.977 | 1.503 | 1.797 | 1.946 | 0.507 | 0.606 |
| 4.615 | 2.816 | 2.380 | 2.758 | 3.495 | 0.728 | 0.606 |
| 2.646 | 3.396 | 2.818 | 3.036 | 2.530 | 0.425 | 0.606 |
| 1.872 | 3.063 | 2.885 | 2.509 | 2.946 | 0.474 | 0.606 |
| 2.183 | 2.511 | 2.089 | 3.697 | 2.926 | 0.463 | 0.606 |
| 5.040 | 4.705 | 6.052 | 3.889 | 4.375 | 0.500 | 0.606 |
| 4.014 | 3.747 | 4.473 | 3.307 | 3.356 | 0.534 | 0.606 |
| 4.032 | 3.580 | 3.243 | 4.674 | 4.226 | 0.495 | 0.606 |
| 4.932 | 5.026 | 4.709 | 5.244 | 5.027 | 0.337 | 0.606 |
| 4.220 | 4.498 | 3.488 | 5.288 | 5.168 | 0.444 | 0.606 |
| 3.651 | 3.220 | 4.323 | 3.377 | 2.770 | 0.556 | 0.606 |
| 2.853 | 2.929 | 3.229 | 2.679 | 3.045 | 0.534 | 0.606 |
| 3.278 | 3.868 | 2.944 | 3.734 | 3.649 | 0.436 | 0.606 |
| 5.854 | 6.154 | 3.600 | 6.179 | 6.524 | 0.874 | 0.606 |
| 4.707 | 5.135 | 5.654 | 4.558 | 5.033 | 0.451 | 0.606 |
| 8.502 | 9.016 | 8.451 | 9.147 | 8.936 | 0.294 | 0.606 |

|        |        |        |       |       |       |       |
|--------|--------|--------|-------|-------|-------|-------|
| 4.886  | 4.884  | 4.059  | 5.404 | 5.408 | 0.426 | 0.606 |
| 2.324  | 2.955  | 3.105  | 2.291 | 2.537 | 0.411 | 0.606 |
| 6.287  | 6.183  | 4.765  | 6.507 | 6.434 | 0.497 | 0.606 |
| 4.139  | 4.933  | 2.991  | 5.250 | 4.928 | 0.656 | 0.606 |
| 3.458  | 3.088  | 4.703  | 2.361 | 2.650 | 0.663 | 0.606 |
| 2.035  | 2.348  | 1.544  | 2.035 | 1.708 | 0.410 | 0.606 |
| 6.563  | 7.506  | 7.866  | 7.057 | 7.145 | 0.370 | 0.606 |
| 7.208  | 7.011  | 4.928  | 6.804 | 6.716 | 0.475 | 0.606 |
| 6.956  | 6.451  | 7.670  | 5.992 | 6.186 | 0.416 | 0.606 |
| 7.106  | 6.155  | 7.640  | 6.408 | 6.884 | 0.523 | 0.606 |
| 11.116 | 11.254 | 11.521 | 9.406 | 9.136 | 0.636 | 0.606 |
| 2.802  | 3.245  | 2.818  | 3.271 | 3.426 | 0.443 | 0.606 |
| 4.549  | 5.043  | 5.059  | 5.585 | 4.384 | 0.510 | 0.606 |
| 4.212  | 5.241  | 3.843  | 5.372 | 5.062 | 0.404 | 0.606 |
| 3.229  | 5.599  | 2.569  | 5.578 | 5.277 | 0.787 | 0.606 |
| 1.241  | 2.346  | 1.899  | 1.535 | 1.729 | 0.465 | 0.606 |
| 3.672  | 4.570  | 3.546  | 5.356 | 5.214 | 0.523 | 0.606 |
| 4.708  | 4.614  | 2.902  | 5.300 | 4.849 | 0.556 | 0.606 |
| 5.220  | 5.165  | 3.912  | 5.698 | 5.294 | 0.438 | 0.606 |
| 6.855  | 7.441  | 5.738  | 7.412 | 7.518 | 0.416 | 0.606 |
| 5.703  | 6.207  | 5.579  | 6.359 | 6.424 | 0.343 | 0.606 |
| 5.548  | 5.011  | 2.935  | 5.496 | 5.456 | 0.606 | 0.606 |
| 5.590  | 6.277  | 3.406  | 6.641 | 6.452 | 0.688 | 0.606 |
| 5.310  | 5.805  | 3.732  | 6.178 | 5.897 | 0.534 | 0.606 |
| 7.123  | 6.608  | 8.391  | 6.042 | 6.332 | 0.495 | 0.606 |
| 3.890  | 3.840  | 4.310  | 3.688 | 4.817 | 0.675 | 0.606 |
| 5.135  | 5.748  | 5.609  | 5.001 | 5.340 | 0.379 | 0.606 |
| 4.317  | 4.965  | 1.564  | 5.285 | 5.413 | 0.833 | 0.606 |
| 1.987  | 2.111  | 4.005  | 2.626 | 3.231 | 0.573 | 0.606 |
| 7.735  | 6.417  | 7.306  | 6.243 | 6.217 | 0.568 | 0.606 |
| 4.314  | 4.679  | 4.569  | 3.224 | 4.151 | 0.644 | 0.606 |
| 7.665  | 7.494  | 7.565  | 6.914 | 7.325 | 0.397 | 0.606 |
| 1.933  | 2.559  | 2.468  | 2.080 | 3.353 | 0.549 | 0.606 |
| 5.343  | 4.577  | 4.982  | 3.947 | 3.774 | 0.463 | 0.606 |
| 6.313  | 5.454  | 6.426  | 5.417 | 4.970 | 0.438 | 0.606 |
| 7.521  | 7.005  | 7.888  | 6.783 | 6.846 | 0.338 | 0.606 |
| 7.325  | 6.396  | 7.736  | 6.192 | 5.920 | 0.523 | 0.606 |
| 7.370  | 9.239  | 9.096  | 7.883 | 8.015 | 0.643 | 0.606 |
| 1.972  | 3.316  | 2.012  | 2.179 | 2.836 | 0.478 | 0.606 |
| 3.989  | 2.951  | 4.660  | 3.252 | 2.803 | 0.441 | 0.606 |
| 7.410  | 7.775  | 7.226  | 7.891 | 7.843 | 0.336 | 0.606 |
| 5.153  | 5.996  | 5.077  | 6.256 | 6.161 | 0.406 | 0.606 |
| 7.789  | 7.920  | 7.981  | 8.099 | 8.213 | 0.294 | 0.606 |
| 5.265  | 5.071  | 6.666  | 3.672 | 4.695 | 0.664 | 0.606 |
| 2.623  | 3.037  | 2.699  | 2.574 | 2.676 | 0.358 | 0.606 |
| 4.358  | 4.604  | 3.004  | 4.896 | 4.824 | 0.513 | 0.606 |
| 4.185  | 5.882  | 2.455  | 6.506 | 6.467 | 0.852 | 0.606 |
| 3.692  | 3.910  | 2.892  | 4.472 | 4.034 | 0.400 | 0.606 |
| 5.100  | 5.535  | 5.446  | 5.758 | 5.369 | 0.408 | 0.606 |
| 4.708  | 4.801  | 4.106  | 5.457 | 5.150 | 0.336 | 0.606 |

|       |       |       |       |       |       |       |
|-------|-------|-------|-------|-------|-------|-------|
| 4.819 | 6.046 | 3.984 | 5.895 | 5.362 | 0.562 | 0.606 |
| 3.012 | 2.433 | 2.525 | 2.688 | 2.530 | 0.423 | 0.606 |
| 6.790 | 6.649 | 7.843 | 6.471 | 6.612 | 0.345 | 0.606 |
| 4.927 | 4.634 | 5.024 | 4.481 | 4.376 | 0.365 | 0.606 |
| 5.920 | 6.477 | 5.213 | 5.955 | 6.329 | 0.387 | 0.606 |
| 4.563 | 3.646 | 5.026 | 4.108 | 4.096 | 0.466 | 0.606 |
| 9.072 | 7.182 | 3.482 | 6.787 | 6.875 | 1.105 | 0.606 |
| 3.750 | 4.928 | 2.167 | 5.249 | 4.582 | 0.662 | 0.606 |
| 5.494 | 5.587 | 3.048 | 6.591 | 6.185 | 0.759 | 0.606 |
| 2.648 | 1.985 | 1.258 | 3.631 | 3.353 | 0.546 | 0.606 |
| 1.467 | 3.179 | 1.315 | 3.017 | 2.870 | 0.550 | 0.606 |
| 4.206 | 5.646 | 3.573 | 6.124 | 6.295 | 0.656 | 0.606 |
| 7.215 | 5.570 | 7.673 | 4.126 | 4.331 | 0.828 | 0.606 |
| 3.643 | 4.541 | 4.103 | 4.250 | 4.731 | 0.393 | 0.606 |
| 4.130 | 4.203 | 3.634 | 4.690 | 4.418 | 0.411 | 0.606 |
| 4.151 | 2.158 | 2.750 | 2.634 | 2.790 | 0.488 | 0.606 |
| 3.665 | 4.136 | 4.295 | 3.192 | 4.111 | 0.423 | 0.606 |
| 3.564 | 4.316 | 4.239 | 4.613 | 4.856 | 0.513 | 0.606 |
| 4.784 | 3.292 | 3.404 | 2.740 | 2.428 | 0.657 | 0.606 |
| 6.167 | 5.617 | 6.999 | 5.276 | 5.299 | 0.452 | 0.606 |
| 3.480 | 6.022 | 1.763 | 6.337 | 6.057 | 1.000 | 0.606 |
| 6.486 | 7.405 | 6.645 | 7.504 | 7.390 | 0.369 | 0.606 |
| 6.803 | 8.112 | 4.450 | 8.670 | 8.442 | 0.998 | 0.606 |
| 4.740 | 4.713 | 4.510 | 4.589 | 4.842 | 0.471 | 0.606 |
| 5.572 | 7.166 | 3.878 | 7.493 | 7.116 | 0.759 | 0.606 |
| 4.108 | 3.287 | 3.086 | 3.399 | 3.493 | 0.515 | 0.606 |
| 4.133 | 5.083 | 5.355 | 3.742 | 4.808 | 0.748 | 0.606 |
| 3.711 | 5.811 | 3.305 | 5.709 | 6.118 | 0.726 | 0.606 |
| 3.477 | 2.719 | 3.575 | 3.042 | 2.351 | 0.440 | 0.606 |
| 4.825 | 5.920 | 4.468 | 5.869 | 5.920 | 0.437 | 0.606 |
| 3.260 | 3.336 | 1.962 | 3.541 | 3.949 | 0.498 | 0.606 |
| 4.840 | 5.222 | 4.486 | 5.029 | 4.868 | 0.358 | 0.606 |
| 4.103 | 3.409 | 3.494 | 3.910 | 3.616 | 0.402 | 0.606 |
| 6.043 | 5.947 | 6.882 | 5.664 | 5.487 | 0.388 | 0.606 |
| 6.825 | 6.007 | 5.311 | 6.297 | 6.561 | 0.483 | 0.606 |
| 3.803 | 2.778 | 3.094 | 3.239 | 3.462 | 0.448 | 0.606 |
| 6.086 | 5.139 | 6.199 | 4.710 | 5.116 | 0.448 | 0.606 |
| 7.322 | 7.440 | 6.889 | 7.088 | 7.368 | 0.429 | 0.606 |
| 6.551 | 5.979 | 6.588 | 5.127 | 5.334 | 0.453 | 0.606 |
| 8.478 | 8.601 | 8.730 | 7.741 | 8.006 | 0.343 | 0.606 |
| 4.239 | 5.978 | 2.377 | 6.074 | 6.443 | 0.857 | 0.606 |
| 4.022 | 4.676 | 3.963 | 4.583 | 4.835 | 0.419 | 0.606 |
| 6.286 | 6.566 | 5.652 | 6.841 | 6.902 | 0.365 | 0.606 |
| 3.551 | 5.136 | 3.682 | 3.754 | 2.653 | 1.016 | 0.606 |
| 2.498 | 3.057 | 2.914 | 2.663 | 2.797 | 0.594 | 0.606 |
| 3.361 | 2.548 | 2.517 | 2.315 | 2.178 | 0.409 | 0.606 |
| 5.404 | 6.750 | 4.251 | 7.358 | 7.059 | 0.640 | 0.606 |
| 4.704 | 4.265 | 4.468 | 3.904 | 3.978 | 0.647 | 0.606 |
| 1.706 | 2.133 | 2.108 | 1.594 | 2.846 | 0.566 | 0.606 |
| 5.558 | 3.949 | 5.478 | 4.441 | 5.078 | 0.682 | 0.606 |



|        |        |       |        |        |       |       |
|--------|--------|-------|--------|--------|-------|-------|
| 3.168  | 4.200  | 3.854 | 3.631  | 4.224  | 0.361 | 0.606 |
| 5.019  | 4.505  | 5.246 | 3.923  | 4.217  | 0.460 | 0.606 |
| 4.287  | 4.986  | 4.120 | 5.038  | 5.215  | 0.363 | 0.606 |
| 6.690  | 4.160  | 6.076 | 4.900  | 4.273  | 0.683 | 0.606 |
| 5.072  | 3.798  | 3.987 | 3.720  | 3.801  | 0.468 | 0.606 |
| 10.061 | 9.981  | 5.854 | 10.012 | 10.182 | 1.034 | 0.606 |
| 7.108  | 6.902  | 5.112 | 6.862  | 6.912  | 0.476 | 0.606 |
| 5.289  | 6.532  | 7.065 | 6.054  | 5.892  | 0.595 | 0.606 |
| 8.215  | 8.173  | 8.553 | 7.918  | 8.284  | 0.340 | 0.606 |
| 4.893  | 5.027  | 4.232 | 5.240  | 5.211  | 0.400 | 0.606 |
| 4.093  | 1.948  | 3.401 | 2.019  | 2.640  | 0.683 | 0.606 |
| 4.484  | 5.739  | 5.143 | 5.879  | 6.504  | 0.566 | 0.606 |
| 6.177  | 6.616  | 6.310 | 6.778  | 6.569  | 0.325 | 0.606 |
| 2.925  | 3.184  | 3.344 | 3.221  | 2.992  | 0.298 | 0.606 |
| 5.134  | 6.253  | 4.811 | 6.707  | 6.711  | 0.493 | 0.606 |
| 3.557  | 3.616  | 3.059 | 3.989  | 3.766  | 0.362 | 0.606 |
| 4.389  | 5.193  | 3.380 | 5.733  | 5.438  | 0.535 | 0.606 |
| 7.229  | 7.818  | 5.156 | 7.838  | 7.893  | 0.649 | 0.606 |
| 2.507  | 3.078  | 2.991 | 2.362  | 2.348  | 0.401 | 0.606 |
| 3.939  | 5.809  | 3.984 | 5.519  | 5.265  | 0.531 | 0.606 |
| 9.032  | 9.039  | 5.258 | 9.442  | 9.479  | 0.999 | 0.606 |
| 5.871  | 5.440  | 5.764 | 5.315  | 5.210  | 0.341 | 0.606 |
| 5.931  | 5.516  | 5.988 | 4.711  | 5.132  | 0.357 | 0.606 |
| 10.129 | 10.742 | 8.126 | 10.816 | 10.805 | 0.621 | 0.606 |
| 3.172  | 3.847  | 4.028 | 2.807  | 3.381  | 0.535 | 0.606 |
| 7.527  | 6.863  | 7.708 | 6.432  | 6.612  | 0.403 | 0.606 |
| 6.731  | 7.182  | 5.773 | 7.946  | 7.616  | 0.520 | 0.606 |
| 2.517  | 3.176  | 1.830 | 2.721  | 3.262  | 0.399 | 0.606 |
| 6.987  | 8.067  | 5.432 | 8.512  | 8.402  | 0.653 | 0.606 |
| 4.859  | 5.337  | 5.219 | 5.424  | 5.513  | 0.333 | 0.606 |
| 3.754  | 5.007  | 1.277 | 5.774  | 5.217  | 0.870 | 0.606 |
| 5.736  | 5.633  | 6.573 | 5.276  | 5.748  | 0.455 | 0.606 |
| 6.810  | 7.323  | 6.874 | 7.496  | 7.544  | 0.328 | 0.606 |
| 5.335  | 5.496  | 5.490 | 4.556  | 5.278  | 0.380 | 0.606 |
| 5.895  | 5.817  | 5.134 | 6.068  | 6.027  | 0.362 | 0.606 |
| 3.905  | 4.378  | 3.646 | 3.968  | 4.261  | 0.446 | 0.606 |
| 1.347  | 2.498  | 2.628 | 2.814  | 2.718  | 0.482 | 0.606 |
| 1.804  | 2.449  | 2.251 | 1.480  | 2.140  | 0.426 | 0.606 |
| 4.763  | 5.102  | 5.468 | 3.945  | 5.482  | 0.451 | 0.606 |
| 6.843  | 7.576  | 2.924 | 7.780  | 7.818  | 1.031 | 0.606 |
| 6.133  | 5.250  | 5.860 | 5.260  | 5.443  | 0.529 | 0.606 |
| 7.204  | 6.534  | 7.603 | 5.312  | 5.854  | 0.488 | 0.606 |
| 3.135  | 3.093  | 3.554 | 3.312  | 2.788  | 0.452 | 0.606 |
| 5.976  | 6.403  | 5.935 | 6.452  | 6.176  | 0.320 | 0.606 |
| 5.841  | 5.504  | 3.809 | 6.148  | 5.900  | 0.528 | 0.606 |
| 6.622  | 3.330  | 3.285 | 3.689  | 3.436  | 0.757 | 0.606 |
| 3.594  | 2.903  | 3.635 | 3.017  | 3.078  | 0.540 | 0.606 |
| 5.708  | 5.720  | 2.641 | 6.321  | 6.092  | 0.752 | 0.606 |
| 4.354  | 4.927  | 3.805 | 4.928  | 5.178  | 0.413 | 0.606 |
| 2.704  | 3.641  | 2.953 | 3.798  | 3.737  | 0.405 | 0.606 |

|       |       |       |       |       |       |       |
|-------|-------|-------|-------|-------|-------|-------|
| 8.307 | 8.960 | 5.679 | 9.040 | 8.939 | 0.729 | 0.606 |
| 7.073 | 9.238 | 5.200 | 9.458 | 9.332 | 1.020 | 0.606 |
| 8.235 | 6.073 | 2.421 | 5.835 | 6.878 | 1.170 | 0.606 |
| 4.472 | 4.220 | 4.681 | 3.140 | 3.458 | 0.491 | 0.606 |
| 4.435 | 3.672 | 3.834 | 4.084 | 4.469 | 0.416 | 0.606 |
| 5.526 | 7.278 | 3.301 | 7.027 | 7.190 | 0.823 | 0.606 |
| 5.091 | 5.612 | 2.734 | 6.271 | 6.062 | 0.725 | 0.606 |
| 3.308 | 3.457 | 2.180 | 3.801 | 3.688 | 0.546 | 0.606 |
| 2.799 | 3.392 | 3.436 | 3.341 | 3.063 | 0.372 | 0.606 |
| 3.265 | 4.620 | 3.965 | 4.712 | 4.749 | 0.474 | 0.606 |
| 4.106 | 3.896 | 4.351 | 2.873 | 3.674 | 0.538 | 0.606 |
| 8.050 | 9.385 | 4.867 | 9.412 | 9.219 | 1.019 | 0.606 |
| 8.098 | 8.881 | 3.672 | 9.304 | 9.025 | 1.142 | 0.606 |
| 5.043 | 5.430 | 2.898 | 5.922 | 5.932 | 0.715 | 0.606 |
| 3.478 | 3.215 | 2.573 | 2.579 | 2.669 | 0.473 | 0.606 |
| 7.121 | 7.034 | 5.361 | 7.573 | 7.510 | 0.485 | 0.606 |
| 4.528 | 3.957 | 5.212 | 3.183 | 3.510 | 0.494 | 0.606 |
| 5.569 | 6.497 | 4.577 | 6.796 | 6.291 | 0.493 | 0.606 |
| 5.577 | 6.555 | 4.560 | 6.725 | 6.327 | 0.490 | 0.606 |
| 5.059 | 5.598 | 4.482 | 5.464 | 5.370 | 0.376 | 0.606 |
| 7.198 | 6.679 | 8.043 | 5.277 | 5.993 | 0.571 | 0.606 |
| 6.102 | 6.201 | 2.730 | 6.470 | 6.397 | 0.788 | 0.606 |
| 7.688 | 8.062 | 6.658 | 8.549 | 8.523 | 0.463 | 0.606 |
| 8.191 | 6.729 | 8.164 | 6.637 | 5.730 | 0.633 | 0.606 |
| 3.020 | 1.649 | 4.044 | 1.828 | 2.574 | 0.559 | 0.606 |
| 4.213 | 5.264 | 3.272 | 5.836 | 5.559 | 0.554 | 0.606 |
| 5.781 | 5.951 | 6.187 | 6.196 | 5.796 | 0.396 | 0.606 |
| 1.516 | 3.244 | 1.080 | 3.864 | 3.564 | 0.658 | 0.606 |
| 6.082 | 6.658 | 4.657 | 6.623 | 6.445 | 0.544 | 0.606 |
| 5.419 | 6.582 | 3.845 | 5.731 | 5.743 | 0.498 | 0.606 |
| 7.398 | 6.385 | 7.853 | 6.041 | 5.709 | 0.537 | 0.606 |
| 5.119 | 6.631 | 2.875 | 7.177 | 7.061 | 0.901 | 0.606 |
| 4.911 | 4.372 | 4.778 | 4.704 | 4.469 | 0.621 | 0.606 |
| 3.045 | 2.751 | 1.933 | 3.561 | 3.280 | 0.425 | 0.606 |
| 4.446 | 6.162 | 2.717 | 6.453 | 6.141 | 0.800 | 0.606 |
| 5.728 | 5.660 | 5.703 | 6.323 | 6.002 | 0.422 | 0.606 |
| 4.600 | 6.110 | 2.947 | 6.454 | 6.461 | 0.832 | 0.606 |
| 6.282 | 6.835 | 5.513 | 6.978 | 7.045 | 0.460 | 0.606 |
| 8.010 | 5.668 | 2.323 | 6.027 | 7.231 | 1.354 | 0.606 |
| 5.493 | 4.826 | 2.446 | 5.288 | 5.108 | 0.646 | 0.606 |
| 8.620 | 8.775 | 3.051 | 9.565 | 9.324 | 1.287 | 0.606 |
| 5.693 | 7.188 | 4.493 | 7.164 | 7.075 | 0.699 | 0.606 |
| 4.004 | 2.493 | 2.920 | 2.712 | 2.747 | 0.498 | 0.606 |
| 3.726 | 5.634 | 2.512 | 6.163 | 6.233 | 0.876 | 0.606 |
| 5.158 | 5.513 | 4.790 | 5.656 | 5.923 | 0.377 | 0.606 |
| 4.073 | 3.769 | 4.718 | 2.893 | 3.306 | 0.665 | 0.606 |
| 4.086 | 3.487 | 4.828 | 4.454 | 3.641 | 0.556 | 0.606 |
| 5.309 | 4.527 | 1.514 | 5.033 | 5.042 | 0.892 | 0.606 |
| 3.760 | 2.472 | 3.340 | 2.707 | 3.474 | 0.481 | 0.606 |
| 4.082 | 4.234 | 3.575 | 3.776 | 4.252 | 0.464 | 0.606 |

|       |       |       |       |       |       |       |
|-------|-------|-------|-------|-------|-------|-------|
| 5.572 | 3.180 | 1.546 | 3.124 | 3.803 | 0.881 | 0.606 |
| 2.414 | 3.845 | 1.712 | 4.591 | 4.681 | 0.785 | 0.606 |
| 4.479 | 4.553 | 3.551 | 4.625 | 4.761 | 0.406 | 0.606 |
| 4.652 | 3.906 | 2.975 | 3.961 | 4.096 | 0.431 | 0.606 |
| 2.695 | 4.141 | 3.023 | 3.427 | 3.303 | 0.486 | 0.606 |
| 4.239 | 3.479 | 4.235 | 2.518 | 3.386 | 0.544 | 0.606 |
| 4.606 | 5.180 | 4.904 | 5.524 | 5.060 | 0.354 | 0.606 |
| 5.885 | 6.108 | 6.177 | 6.334 | 6.144 | 0.386 | 0.606 |
| 5.117 | 5.500 | 4.667 | 6.065 | 6.088 | 0.406 | 0.606 |
| 4.328 | 4.865 | 4.956 | 5.181 | 5.280 | 0.357 | 0.606 |
| 3.484 | 3.167 | 3.172 | 2.479 | 2.249 | 0.628 | 0.606 |
| 4.173 | 5.136 | 4.651 | 3.973 | 4.543 | 0.571 | 0.606 |
| 2.365 | 3.143 | 2.337 | 2.245 | 2.340 | 0.435 | 0.606 |
| 7.135 | 7.908 | 5.474 | 8.083 | 8.008 | 0.694 | 0.606 |
| 3.255 | 2.614 | 3.001 | 2.804 | 2.542 | 0.391 | 0.606 |
| 5.439 | 4.986 | 5.728 | 4.300 | 4.474 | 0.382 | 0.606 |
| 7.054 | 5.953 | 7.313 | 4.766 | 5.292 | 0.541 | 0.606 |
| 7.804 | 7.712 | 7.372 | 8.289 | 7.928 | 0.330 | 0.606 |
| 4.005 | 4.773 | 4.228 | 3.705 | 4.086 | 0.387 | 0.606 |
| 4.263 | 4.976 | 4.416 | 3.935 | 4.263 | 0.379 | 0.606 |
| 3.954 | 3.140 | 3.607 | 2.890 | 3.563 | 0.362 | 0.606 |
| 5.106 | 4.527 | 4.678 | 4.596 | 4.833 | 0.530 | 0.606 |
| 3.141 | 1.998 | 3.164 | 3.198 | 2.877 | 0.481 | 0.606 |
| 4.378 | 2.978 | 4.093 | 3.097 | 3.201 | 0.566 | 0.606 |
| 5.552 | 3.779 | 5.051 | 3.619 | 4.485 | 0.707 | 0.606 |
| 4.016 | 2.748 | 3.122 | 1.980 | 2.239 | 0.485 | 0.606 |
| 4.214 | 2.647 | 3.397 | 1.894 | 2.575 | 0.617 | 0.606 |
| 5.570 | 4.517 | 5.065 | 5.077 | 5.168 | 0.444 | 0.606 |
| 4.416 | 3.719 | 4.246 | 3.006 | 3.531 | 0.584 | 0.606 |
| 4.602 | 4.183 | 3.855 | 5.130 | 4.689 | 0.515 | 0.606 |
| 6.960 | 5.952 | 7.396 | 5.011 | 5.318 | 0.590 | 0.606 |
| 5.955 | 5.836 | 5.965 | 4.286 | 4.994 | 0.510 | 0.606 |
| 5.852 | 5.792 | 5.454 | 6.139 | 6.078 | 0.384 | 0.606 |
| 5.648 | 6.553 | 4.428 | 6.617 | 6.421 | 0.584 | 0.606 |
| 4.473 | 4.092 | 4.699 | 4.075 | 4.140 | 0.424 | 0.606 |
| 5.633 | 6.579 | 3.936 | 6.412 | 6.436 | 0.642 | 0.606 |
| 5.791 | 5.297 | 4.125 | 5.687 | 5.844 | 0.488 | 0.606 |
| 6.358 | 6.514 | 4.757 | 6.457 | 6.735 | 0.474 | 0.606 |
| 4.556 | 5.272 | 3.682 | 4.873 | 5.237 | 0.440 | 0.606 |
| 4.729 | 5.346 | 4.524 | 5.975 | 5.741 | 0.425 | 0.606 |
| 1.585 | 6.006 | 2.015 | 5.914 | 6.152 | 1.094 | 0.606 |
| 5.125 | 5.686 | 5.371 | 5.922 | 5.566 | 0.314 | 0.606 |
| 2.554 | 3.356 | 2.652 | 3.292 | 2.609 | 0.449 | 0.606 |
| 2.134 | 2.832 | 2.848 | 3.403 | 3.413 | 0.472 | 0.606 |
| 3.570 | 4.081 | 3.196 | 3.637 | 3.056 | 0.451 | 0.606 |
| 3.217 | 3.221 | 4.031 | 2.145 | 2.648 | 0.511 | 0.606 |
| 5.196 | 4.267 | 2.828 | 5.576 | 4.955 | 0.840 | 0.606 |
| 3.977 | 2.852 | 3.499 | 2.934 | 3.025 | 0.394 | 0.606 |
| 5.299 | 5.834 | 4.489 | 5.521 | 5.884 | 0.435 | 0.606 |
| 4.119 | 3.940 | 4.741 | 3.955 | 3.983 | 0.405 | 0.606 |

|        |       |        |       |       |       |       |
|--------|-------|--------|-------|-------|-------|-------|
| 4.182  | 2.573 | 3.425  | 4.456 | 3.357 | 0.496 | 0.606 |
| 2.949  | 2.351 | 2.444  | 2.094 | 2.587 | 0.350 | 0.606 |
| 3.748  | 5.031 | 3.399  | 5.749 | 5.079 | 0.620 | 0.606 |
| 7.051  | 6.355 | 7.785  | 6.273 | 6.365 | 0.370 | 0.606 |
| 2.534  | 3.076 | 2.960  | 2.551 | 2.311 | 0.419 | 0.606 |
| 6.418  | 6.108 | 7.445  | 6.163 | 6.299 | 0.390 | 0.606 |
| 3.986  | 4.532 | 4.898  | 3.892 | 4.285 | 0.360 | 0.606 |
| 3.973  | 3.441 | 3.093  | 3.004 | 4.191 | 0.389 | 0.606 |
| 3.430  | 4.042 | 4.542  | 4.843 | 4.097 | 0.538 | 0.606 |
| 5.131  | 4.981 | 4.970  | 5.538 | 5.539 | 0.319 | 0.606 |
| 6.086  | 5.610 | 7.051  | 4.928 | 5.021 | 0.483 | 0.606 |
| 3.400  | 2.580 | 2.223  | 2.489 | 2.404 | 0.434 | 0.606 |
| 4.359  | 2.175 | 1.978  | 3.027 | 3.418 | 0.698 | 0.606 |
| 2.097  | 2.207 | 2.589  | 1.923 | 2.298 | 0.496 | 0.606 |
| 1.016  | 2.021 | 1.049  | 2.076 | 3.081 | 0.483 | 0.606 |
| 3.085  | 2.065 | 2.171  | 2.773 | 2.031 | 0.519 | 0.606 |
| 6.124  | 5.410 | 5.348  | 5.432 | 6.041 | 0.387 | 0.606 |
| 5.124  | 4.721 | 3.751  | 5.293 | 5.167 | 0.421 | 0.606 |
| 2.493  | 3.710 | 2.604  | 3.227 | 2.862 | 0.510 | 0.606 |
| 2.620  | 2.874 | 1.763  | 2.784 | 2.357 | 0.447 | 0.606 |
| 4.250  | 3.597 | 3.498  | 3.827 | 3.909 | 0.367 | 0.606 |
| 4.010  | 5.219 | 4.060  | 5.347 | 4.731 | 0.428 | 0.606 |
| 5.413  | 5.281 | 5.201  | 5.594 | 6.086 | 0.439 | 0.606 |
| 3.161  | 2.213 | 1.576  | 2.525 | 1.682 | 0.820 | 0.606 |
| 2.651  | 2.366 | 1.593  | 2.202 | 1.789 | 0.409 | 0.606 |
| 2.758  | 2.646 | 2.915  | 2.530 | 2.071 | 0.438 | 0.606 |
| 5.123  | 4.687 | 5.429  | 4.487 | 3.362 | 0.856 | 0.606 |
| 6.142  | 5.237 | 6.192  | 4.910 | 5.306 | 0.395 | 0.606 |
| 6.437  | 6.063 | 4.529  | 6.438 | 6.500 | 0.572 | 0.606 |
| 5.020  | 6.057 | 2.949  | 6.690 | 6.108 | 0.813 | 0.606 |
| 5.652  | 5.985 | 3.488  | 6.502 | 6.274 | 0.606 | 0.606 |
| 2.354  | 2.128 | 2.115  | 1.975 | 1.727 | 0.494 | 0.606 |
| 4.818  | 4.742 | 5.206  | 3.761 | 4.113 | 0.441 | 0.606 |
| 6.012  | 5.479 | 5.257  | 5.713 | 5.024 | 0.404 | 0.606 |
| 2.210  | 3.525 | 1.642  | 3.517 | 3.400 | 0.596 | 0.606 |
| 2.712  | 2.084 | 2.101  | 1.976 | 2.773 | 0.513 | 0.606 |
| 2.788  | 4.399 | 2.887  | 4.548 | 3.714 | 0.563 | 0.606 |
| 5.941  | 5.483 | 6.477  | 4.559 | 4.622 | 0.496 | 0.606 |
| 2.456  | 8.212 | 2.269  | 8.560 | 8.443 | 1.525 | 0.606 |
| 5.332  | 5.617 | 5.638  | 5.636 | 5.819 | 0.315 | 0.606 |
| 2.535  | 1.704 | 1.328  | 1.787 | 1.269 | 0.456 | 0.606 |
| 2.818  | 3.732 | 3.806  | 4.467 | 4.109 | 0.546 | 0.606 |
| 4.169  | 4.238 | 4.553  | 4.476 | 4.084 | 0.302 | 0.606 |
| 3.335  | 2.765 | 3.070  | 2.654 | 2.649 | 0.349 | 0.606 |
| 10.882 | 9.662 | 10.848 | 8.109 | 8.217 | 0.744 | 0.606 |
| 4.771  | 5.366 | 5.154  | 5.781 | 5.456 | 0.406 | 0.606 |
| 2.151  | 1.818 | 2.138  | 1.859 | 1.544 | 0.372 | 0.606 |
| 2.554  | 2.627 | 2.109  | 2.140 | 2.349 | 0.426 | 0.606 |
| 6.718  | 7.643 | 7.322  | 7.946 | 7.746 | 0.399 | 0.606 |
| 2.020  | 3.961 | 1.879  | 3.621 | 3.429 | 0.554 | 0.606 |

|       |       |       |       |       |       |       |
|-------|-------|-------|-------|-------|-------|-------|
| 5.705 | 5.897 | 5.507 | 5.959 | 6.494 | 0.439 | 0.606 |
| 4.760 | 4.671 | 6.006 | 3.336 | 3.852 | 0.554 | 0.606 |
| 5.464 | 5.276 | 5.738 | 4.366 | 4.947 | 0.436 | 0.606 |
| 4.196 | 4.826 | 4.068 | 3.783 | 4.859 | 0.523 | 0.606 |
| 6.097 | 7.190 | 6.979 | 7.168 | 7.432 | 0.509 | 0.606 |
| 2.237 | 1.762 | 1.946 | 2.232 | 2.255 | 0.510 | 0.606 |
| 5.495 | 4.696 | 6.573 | 3.894 | 4.353 | 0.641 | 0.606 |
| 3.126 | 3.192 | 3.308 | 2.374 | 3.454 | 0.560 | 0.606 |
| 6.278 | 5.909 | 6.592 | 5.495 | 6.071 | 0.514 | 0.606 |
| 5.928 | 6.464 | 6.191 | 5.530 | 6.492 | 0.427 | 0.606 |
| 4.036 | 4.586 | 2.666 | 5.069 | 4.777 | 0.569 | 0.606 |
| 2.684 | 2.643 | 3.017 | 2.493 | 2.281 | 0.364 | 0.606 |
| 4.715 | 6.035 | 5.362 | 4.621 | 6.496 | 0.566 | 0.606 |
| 4.025 | 4.682 | 4.554 | 4.962 | 5.329 | 0.456 | 0.606 |
| 3.715 | 3.164 | 4.991 | 3.525 | 3.202 | 0.541 | 0.606 |
| 3.989 | 3.994 | 4.698 | 3.974 | 4.623 | 0.434 | 0.606 |
| 2.460 | 3.551 | 3.496 | 2.569 | 3.118 | 0.623 | 0.606 |
| 4.486 | 5.950 | 4.744 | 4.654 | 4.503 | 0.666 | 0.606 |
| 7.494 | 6.248 | 7.252 | 5.579 | 6.194 | 0.497 | 0.606 |
| 5.743 | 4.284 | 4.166 | 4.176 | 4.706 | 0.492 | 0.606 |
| 4.526 | 4.628 | 3.973 | 4.179 | 4.170 | 0.424 | 0.606 |
| 2.166 | 2.660 | 2.386 | 2.245 | 3.114 | 0.412 | 0.606 |
| 4.838 | 5.074 | 6.376 | 3.224 | 3.661 | 0.698 | 0.606 |
| 4.570 | 3.803 | 5.168 | 3.221 | 3.679 | 0.645 | 0.606 |
| 2.386 | 3.147 | 3.014 | 3.006 | 3.064 | 0.486 | 0.606 |
| 4.524 | 6.926 | 4.291 | 7.581 | 7.018 | 0.751 | 0.606 |
| 2.374 | 3.071 | 1.829 | 3.607 | 3.291 | 0.588 | 0.606 |
| 2.905 | 3.748 | 3.597 | 4.234 | 4.284 | 0.434 | 0.606 |
| 3.031 | 3.306 | 3.265 | 2.668 | 4.187 | 0.463 | 0.606 |
| 3.848 | 3.979 | 4.206 | 4.585 | 4.283 | 0.340 | 0.606 |
| 4.398 | 4.306 | 1.732 | 4.884 | 4.710 | 0.671 | 0.606 |
| 5.115 | 5.706 | 4.785 | 5.795 | 5.530 | 0.373 | 0.606 |
| 6.258 | 5.828 | 6.515 | 5.795 | 6.296 | 0.416 | 0.606 |
| 2.874 | 4.716 | 2.954 | 5.293 | 4.689 | 0.637 | 0.606 |
| 2.403 | 3.387 | 3.134 | 3.307 | 3.729 | 0.478 | 0.606 |
| 3.254 | 2.866 | 3.937 | 3.540 | 3.887 | 0.388 | 0.606 |
| 3.312 | 3.499 | 3.307 | 2.186 | 3.245 | 0.472 | 0.606 |
| 6.462 | 6.920 | 5.942 | 6.889 | 6.823 | 0.442 | 0.606 |
| 4.931 | 4.060 | 4.988 | 4.305 | 4.702 | 0.457 | 0.606 |
| 4.630 | 5.140 | 4.587 | 5.646 | 5.202 | 0.343 | 0.606 |
| 5.614 | 6.525 | 5.446 | 4.951 | 6.021 | 0.511 | 0.606 |
| 7.989 | 7.292 | 7.888 | 6.715 | 6.834 | 0.380 | 0.606 |
| 7.962 | 7.374 | 6.725 | 6.690 | 7.088 | 0.399 | 0.606 |
| 5.264 | 4.651 | 4.268 | 4.326 | 4.652 | 0.711 | 0.606 |
| 6.124 | 6.850 | 7.345 | 6.680 | 6.172 | 0.538 | 0.606 |
| 5.594 | 6.628 | 5.888 | 6.817 | 6.860 | 0.418 | 0.606 |
| 6.091 | 4.893 | 6.916 | 4.205 | 4.362 | 0.597 | 0.606 |
| 6.834 | 6.113 | 7.837 | 5.186 | 5.933 | 0.612 | 0.606 |
| 2.401 | 3.046 | 2.988 | 3.357 | 3.521 | 0.428 | 0.606 |
| 2.316 | 3.458 | 2.713 | 2.371 | 2.444 | 0.444 | 0.606 |

|       |       |       |       |       |       |       |
|-------|-------|-------|-------|-------|-------|-------|
| 5.339 | 5.526 | 4.516 | 5.965 | 5.695 | 0.372 | 0.606 |
| 5.239 | 4.763 | 4.781 | 4.348 | 4.689 | 0.350 | 0.606 |
| 3.356 | 3.803 | 3.421 | 4.424 | 4.224 | 0.389 | 0.606 |
| 3.504 | 4.159 | 4.663 | 2.447 | 3.300 | 0.592 | 0.606 |
| 6.977 | 6.621 | 7.263 | 5.866 | 6.005 | 0.390 | 0.606 |
| 6.190 | 6.935 | 6.440 | 6.963 | 6.802 | 0.318 | 0.606 |
| 4.110 | 4.242 | 4.795 | 3.062 | 3.868 | 0.641 | 0.606 |
| 3.513 | 3.843 | 4.203 | 3.020 | 3.593 | 0.639 | 0.606 |
| 4.448 | 5.283 | 5.794 | 4.189 | 3.880 | 0.757 | 0.606 |
| 4.007 | 4.092 | 5.005 | 2.846 | 4.132 | 0.643 | 0.606 |
| 5.906 | 5.198 | 6.591 | 5.597 | 6.230 | 0.573 | 0.606 |
| 3.801 | 4.867 | 5.687 | 3.777 | 4.690 | 0.618 | 0.606 |
| 3.407 | 2.803 | 3.715 | 3.015 | 2.877 | 0.498 | 0.606 |
| 4.175 | 3.530 | 5.129 | 2.529 | 3.605 | 0.678 | 0.606 |
| 1.517 | 3.146 | 2.338 | 1.912 | 1.696 | 0.624 | 0.606 |
| 4.316 | 4.718 | 4.044 | 5.019 | 4.664 | 0.384 | 0.606 |
| 6.327 | 6.490 | 6.386 | 6.334 | 7.194 | 0.471 | 0.606 |
| 4.093 | 3.413 | 3.156 | 3.553 | 4.135 | 0.439 | 0.606 |
| 6.057 | 5.948 | 5.543 | 6.061 | 6.061 | 0.445 | 0.606 |
| 3.542 | 3.915 | 3.706 | 2.019 | 2.696 | 0.561 | 0.606 |
| 4.810 | 4.453 | 5.290 | 3.667 | 4.360 | 0.404 | 0.606 |
| 1.659 | 2.237 | 1.738 | 1.922 | 2.356 | 0.360 | 0.606 |
| 5.769 | 5.008 | 6.706 | 3.573 | 3.913 | 0.661 | 0.606 |
| 8.098 | 6.675 | 8.371 | 5.296 | 5.854 | 0.740 | 0.606 |
| 3.046 | 3.449 | 3.602 | 2.232 | 2.868 | 0.491 | 0.606 |
| 3.921 | 4.639 | 4.288 | 5.078 | 4.885 | 0.423 | 0.606 |
| 3.437 | 2.681 | 3.999 | 3.289 | 3.313 | 0.426 | 0.606 |
| 6.130 | 5.330 | 6.981 | 4.568 | 4.666 | 0.526 | 0.606 |
| 2.601 | 1.982 | 3.386 | 2.324 | 2.217 | 0.451 | 0.606 |
| 3.948 | 3.470 | 3.913 | 3.282 | 3.389 | 0.399 | 0.606 |
| 6.343 | 6.688 | 5.800 | 6.749 | 6.754 | 0.413 | 0.606 |
| 6.335 | 6.051 | 6.734 | 6.263 | 6.131 | 0.395 | 0.606 |
| 5.535 | 4.805 | 5.913 | 4.285 | 4.360 | 0.447 | 0.606 |
| 4.417 | 4.119 | 4.675 | 3.451 | 4.078 | 0.431 | 0.606 |
| 2.400 | 3.625 | 2.404 | 3.894 | 3.827 | 0.514 | 0.606 |
| 3.675 | 3.982 | 4.639 | 3.443 | 3.770 | 0.571 | 0.606 |
| 2.861 | 2.674 | 3.217 | 1.744 | 2.154 | 0.439 | 0.606 |
| 7.792 | 8.020 | 3.281 | 8.343 | 7.989 | 1.093 | 0.606 |
| 4.845 | 6.265 | 4.570 | 6.871 | 6.634 | 0.619 | 0.606 |
| 3.479 | 5.298 | 2.810 | 5.833 | 5.495 | 0.701 | 0.606 |
| 4.564 | 4.354 | 4.108 | 4.273 | 4.193 | 0.511 | 0.606 |
| 4.000 | 2.926 | 4.919 | 1.488 | 1.681 | 0.750 | 0.606 |
| 4.770 | 4.206 | 5.248 | 3.605 | 3.121 | 0.607 | 0.606 |
| 5.585 | 6.244 | 8.347 | 3.718 | 4.504 | 0.902 | 0.606 |
| 7.465 | 6.207 | 8.070 | 5.307 | 6.028 | 0.686 | 0.606 |
| 5.497 | 5.249 | 4.301 | 5.762 | 5.477 | 0.515 | 0.606 |
| 7.571 | 7.525 | 6.597 | 7.652 | 7.556 | 0.348 | 0.606 |
| 5.679 | 7.210 | 5.787 | 7.268 | 7.666 | 0.526 | 0.606 |
| 6.436 | 5.836 | 7.095 | 5.292 | 5.151 | 0.476 | 0.606 |
| 1.724 | 2.715 | 1.460 | 3.942 | 2.539 | 0.539 | 0.606 |

|       |       |       |       |       |       |       |
|-------|-------|-------|-------|-------|-------|-------|
| 1.551 | 5.214 | 1.316 | 5.781 | 5.477 | 1.001 | 0.606 |
| 3.891 | 3.326 | 4.612 | 3.221 | 3.255 | 0.574 | 0.606 |
| 3.815 | 5.080 | 3.530 | 4.968 | 4.773 | 0.600 | 0.606 |
| 4.896 | 5.695 | 4.338 | 5.161 | 4.976 | 0.439 | 0.606 |
| 5.891 | 5.467 | 4.858 | 6.012 | 5.532 | 0.427 | 0.606 |
| 8.259 | 6.869 | 9.074 | 5.905 | 6.312 | 0.711 | 0.606 |
| 5.762 | 5.299 | 5.831 | 5.058 | 5.190 | 0.460 | 0.606 |
| 3.635 | 3.535 | 2.880 | 4.127 | 4.254 | 0.519 | 0.606 |
| 3.161 | 2.929 | 2.348 | 3.116 | 3.491 | 0.356 | 0.606 |
| 5.490 | 6.294 | 5.828 | 6.728 | 6.388 | 0.370 | 0.606 |
| 3.115 | 2.690 | 2.940 | 1.916 | 3.125 | 0.470 | 0.606 |
| 3.894 | 3.615 | 3.831 | 3.938 | 2.919 | 0.435 | 0.606 |
| 5.546 | 5.702 | 6.260 | 4.579 | 4.724 | 0.469 | 0.606 |
| 4.796 | 5.063 | 4.001 | 5.176 | 5.337 | 0.370 | 0.606 |
| 6.183 | 6.697 | 4.450 | 7.107 | 6.902 | 0.628 | 0.606 |
| 4.887 | 4.797 | 3.784 | 4.886 | 5.282 | 0.471 | 0.606 |
| 3.776 | 4.050 | 3.308 | 4.146 | 4.329 | 0.368 | 0.606 |
| 4.938 | 4.738 | 5.960 | 3.870 | 4.756 | 0.458 | 0.606 |
| 6.686 | 7.252 | 6.678 | 7.462 | 7.203 | 0.351 | 0.606 |
| 6.264 | 6.469 | 5.856 | 6.877 | 6.675 | 0.420 | 0.606 |
| 4.335 | 5.322 | 4.342 | 5.466 | 5.007 | 0.431 | 0.606 |
| 5.612 | 6.241 | 3.550 | 6.634 | 6.717 | 0.818 | 0.606 |
| 3.109 | 4.107 | 3.087 | 4.533 | 3.850 | 0.426 | 0.606 |
| 5.742 | 5.146 | 6.942 | 4.619 | 4.904 | 0.486 | 0.606 |
| 5.017 | 5.751 | 4.799 | 5.997 | 6.013 | 0.419 | 0.606 |
| 2.509 | 2.680 | 2.800 | 3.637 | 3.356 | 0.391 | 0.606 |
| 3.955 | 4.548 | 5.002 | 4.323 | 5.058 | 0.517 | 0.606 |
| 5.734 | 4.323 | 6.394 | 4.112 | 3.954 | 0.667 | 0.606 |
| 4.114 | 3.333 | 3.427 | 3.549 | 3.814 | 0.408 | 0.606 |
| 2.594 | 3.686 | 1.976 | 3.390 | 3.732 | 0.571 | 0.606 |
| 4.387 | 3.546 | 5.085 | 4.284 | 4.273 | 0.385 | 0.606 |
| 2.312 | 3.109 | 2.294 | 3.524 | 2.958 | 0.464 | 0.606 |
| 4.168 | 4.318 | 3.746 | 4.546 | 4.505 | 0.448 | 0.606 |
| 4.839 | 3.721 | 5.239 | 3.079 | 2.849 | 0.563 | 0.606 |
| 3.504 | 5.026 | 2.845 | 5.336 | 4.696 | 0.674 | 0.606 |
| 3.811 | 5.169 | 3.656 | 4.704 | 5.007 | 0.484 | 0.606 |
| 5.635 | 6.274 | 5.418 | 6.238 | 6.413 | 0.342 | 0.606 |
| 4.796 | 5.166 | 4.014 | 5.078 | 5.192 | 0.404 | 0.606 |
| 2.612 | 1.978 | 3.312 | 1.817 | 2.202 | 0.486 | 0.606 |
| 8.333 | 5.338 | 6.324 | 4.824 | 4.832 | 0.737 | 0.606 |
| 3.020 | 3.582 | 3.217 | 3.961 | 3.054 | 0.413 | 0.606 |
| 5.145 | 5.041 | 5.230 | 5.988 | 6.025 | 0.476 | 0.606 |
| 1.834 | 2.424 | 1.542 | 2.497 | 2.264 | 0.693 | 0.606 |
| 6.425 | 6.272 | 3.485 | 6.845 | 6.519 | 0.831 | 0.606 |
| 5.409 | 5.722 | 4.392 | 6.177 | 5.900 | 0.479 | 0.606 |
| 5.511 | 4.946 | 6.130 | 4.631 | 4.882 | 0.417 | 0.606 |
| 3.533 | 4.365 | 2.177 | 3.360 | 3.490 | 0.449 | 0.606 |
| 3.995 | 3.383 | 4.686 | 2.785 | 3.246 | 0.482 | 0.606 |
| 3.176 | 2.733 | 4.099 | 2.589 | 2.281 | 0.441 | 0.606 |
| 2.875 | 3.222 | 2.810 | 2.840 | 2.448 | 0.462 | 0.606 |

|       |       |       |       |       |       |       |
|-------|-------|-------|-------|-------|-------|-------|
| 5.287 | 5.638 | 5.601 | 5.956 | 5.913 | 0.291 | 0.606 |
| 6.919 | 7.787 | 5.174 | 7.948 | 7.608 | 0.696 | 0.606 |
| 4.439 | 4.852 | 4.721 | 5.264 | 5.193 | 0.353 | 0.606 |
| 1.895 | 1.909 | 2.062 | 1.440 | 1.766 | 0.392 | 0.606 |
| 8.635 | 7.339 | 9.394 | 5.736 | 6.255 | 0.781 | 0.606 |
| 6.214 | 6.221 | 4.192 | 6.514 | 6.398 | 0.498 | 0.606 |
| 6.330 | 7.409 | 6.392 | 7.584 | 7.318 | 0.382 | 0.606 |
| 4.659 | 4.522 | 3.708 | 4.364 | 4.862 | 0.423 | 0.606 |
| 3.133 | 3.443 | 3.112 | 3.907 | 3.724 | 0.355 | 0.606 |
| 2.203 | 1.559 | 2.087 | 1.872 | 1.740 | 0.488 | 0.606 |
| 3.107 | 2.631 | 2.023 | 2.714 | 3.568 | 0.469 | 0.606 |
| 3.262 | 3.946 | 1.875 | 3.908 | 3.992 | 0.572 | 0.606 |
| 2.662 | 3.603 | 3.385 | 3.811 | 4.245 | 0.453 | 0.606 |
| 7.562 | 6.787 | 8.254 | 6.342 | 6.623 | 0.459 | 0.606 |
| 4.204 | 2.717 | 3.915 | 3.026 | 3.382 | 0.615 | 0.606 |
| 6.765 | 6.675 | 7.727 | 5.381 | 5.082 | 0.609 | 0.606 |
| 6.673 | 6.645 | 8.063 | 4.778 | 5.755 | 0.687 | 0.606 |
| 5.361 | 3.922 | 6.311 | 3.898 | 3.578 | 0.640 | 0.606 |
| 4.274 | 3.539 | 4.616 | 3.818 | 3.468 | 0.460 | 0.606 |
| 7.349 | 7.728 | 6.718 | 8.318 | 8.068 | 0.435 | 0.606 |
| 8.768 | 9.222 | 7.835 | 9.532 | 9.463 | 0.422 | 0.606 |
| 2.261 | 3.246 | 1.668 | 2.396 | 2.387 | 0.530 | 0.606 |
| 4.972 | 3.274 | 3.850 | 3.861 | 3.485 | 0.648 | 0.606 |
| 5.146 | 5.348 | 5.674 | 3.991 | 4.895 | 0.415 | 0.606 |
| 3.756 | 3.831 | 5.462 | 3.799 | 3.175 | 0.528 | 0.606 |
| 3.799 | 2.765 | 3.903 | 3.090 | 3.198 | 0.748 | 0.606 |
| 6.329 | 6.480 | 5.423 | 6.690 | 6.688 | 0.379 | 0.606 |
| 6.857 | 6.222 | 7.736 | 4.910 | 5.502 | 0.601 | 0.606 |
| 6.398 | 6.938 | 6.621 | 7.223 | 7.316 | 0.322 | 0.606 |
| 6.843 | 6.454 | 6.803 | 5.173 | 5.732 | 0.587 | 0.606 |
| 5.844 | 6.267 | 6.082 | 6.640 | 6.817 | 0.376 | 0.606 |
| 7.896 | 7.533 | 6.318 | 8.026 | 8.199 | 0.426 | 0.606 |
| 5.773 | 5.615 | 6.287 | 2.416 | 3.539 | 0.864 | 0.606 |
| 4.348 | 4.180 | 3.445 | 3.759 | 3.948 | 0.428 | 0.606 |
| 4.444 | 5.619 | 5.049 | 3.902 | 3.847 | 0.655 | 0.606 |
| 3.875 | 3.410 | 4.660 | 3.513 | 2.998 | 0.464 | 0.606 |
| 2.034 | 2.111 | 1.707 | 1.961 | 2.240 | 0.376 | 0.606 |
| 3.000 | 5.003 | 2.525 | 4.839 | 4.626 | 0.648 | 0.606 |
| 4.229 | 5.067 | 3.642 | 4.940 | 4.289 | 0.448 | 0.606 |
| 2.634 | 2.733 | 3.320 | 2.782 | 3.221 | 0.443 | 0.606 |
| 3.271 | 3.139 | 3.908 | 4.055 | 3.521 | 0.454 | 0.606 |
| 2.797 | 3.453 | 2.866 | 4.203 | 3.768 | 0.429 | 0.606 |
| 3.174 | 3.631 | 3.627 | 3.234 | 4.725 | 0.515 | 0.606 |
| 5.397 | 5.421 | 4.354 | 4.347 | 4.415 | 0.581 | 0.606 |
| 2.966 | 2.049 | 2.433 | 2.296 | 1.306 | 0.585 | 0.606 |
| 3.445 | 3.741 | 2.681 | 3.446 | 3.328 | 0.526 | 0.606 |
| 4.860 | 5.255 | 5.651 | 4.587 | 4.946 | 0.370 | 0.606 |
| 5.780 | 7.129 | 7.514 | 4.853 | 5.778 | 0.751 | 0.606 |
| 7.838 | 7.263 | 8.297 | 7.263 | 6.931 | 0.540 | 0.606 |
| 3.038 | 3.498 | 2.493 | 4.371 | 3.698 | 0.462 | 0.606 |



|       |       |       |       |       |       |       |
|-------|-------|-------|-------|-------|-------|-------|
| 5.026 | 4.578 | 4.680 | 3.461 | 5.019 | 0.662 | 0.606 |
| 3.641 | 3.048 | 3.617 | 3.317 | 3.410 | 0.490 | 0.606 |
| 2.488 | 2.566 | 2.944 | 2.730 | 2.426 | 0.379 | 0.606 |
| 2.318 | 2.179 | 2.988 | 1.709 | 1.905 | 0.567 | 0.606 |
| 7.246 | 7.225 | 7.461 | 7.301 | 7.103 | 0.346 | 0.606 |
| 1.526 | 2.516 | 1.302 | 2.041 | 2.116 | 0.499 | 0.606 |
| 1.916 | 3.139 | 2.011 | 2.700 | 3.367 | 0.423 | 0.606 |
| 1.810 | 3.333 | 1.871 | 2.753 | 2.921 | 0.477 | 0.606 |
| 6.314 | 4.530 | 7.333 | 3.970 | 3.783 | 0.752 | 0.606 |
| 5.226 | 4.056 | 5.161 | 3.455 | 3.793 | 0.468 | 0.606 |
| 5.375 | 4.782 | 4.960 | 5.178 | 5.144 | 0.310 | 0.606 |
| 4.328 | 3.409 | 3.269 | 3.453 | 4.480 | 0.406 | 0.606 |
| 4.593 | 4.184 | 3.481 | 3.847 | 4.925 | 0.440 | 0.606 |
| 4.662 | 3.718 | 3.879 | 4.014 | 4.713 | 0.395 | 0.606 |
| 4.722 | 3.825 | 4.077 | 4.254 | 4.886 | 0.427 | 0.606 |
| 4.224 | 3.280 | 3.532 | 3.926 | 4.407 | 0.419 | 0.606 |
| 4.722 | 4.871 | 6.357 | 4.841 | 4.792 | 0.436 | 0.606 |
| 3.313 | 2.096 | 1.968 | 2.192 | 2.546 | 0.470 | 0.606 |
| 5.642 | 6.487 | 5.548 | 6.611 | 6.492 | 0.380 | 0.606 |
| 6.145 | 5.505 | 3.828 | 6.195 | 5.693 | 0.568 | 0.606 |
| 6.632 | 7.100 | 5.917 | 6.957 | 7.165 | 0.372 | 0.606 |
| 6.950 | 7.524 | 5.722 | 7.725 | 7.882 | 0.499 | 0.606 |
| 4.561 | 4.832 | 3.826 | 4.723 | 4.964 | 0.364 | 0.606 |
| 6.910 | 6.800 | 6.330 | 7.011 | 7.032 | 0.309 | 0.606 |
| 6.432 | 6.824 | 6.516 | 6.985 | 6.801 | 0.358 | 0.606 |
| 5.974 | 7.697 | 6.138 | 7.770 | 7.911 | 0.504 | 0.606 |
| 4.153 | 4.192 | 2.348 | 4.254 | 4.375 | 0.512 | 0.606 |
| 4.356 | 5.133 | 5.222 | 4.103 | 4.662 | 0.470 | 0.606 |
| 3.299 | 3.579 | 4.103 | 3.403 | 3.327 | 0.462 | 0.606 |
| 4.510 | 4.209 | 5.002 | 3.159 | 3.915 | 0.461 | 0.606 |
| 8.502 | 7.902 | 8.975 | 5.814 | 6.122 | 0.672 | 0.606 |
| 4.410 | 4.433 | 5.020 | 4.830 | 4.867 | 0.411 | 0.606 |
| 5.067 | 4.391 | 6.030 | 3.242 | 3.154 | 0.643 | 0.606 |
| 2.679 | 2.955 | 1.750 | 3.620 | 3.441 | 0.488 | 0.606 |
| 4.053 | 3.081 | 2.570 | 3.719 | 3.619 | 0.557 | 0.606 |
| 6.309 | 5.386 | 6.497 | 5.507 | 5.549 | 0.424 | 0.606 |
| 5.524 | 5.338 | 6.585 | 6.228 | 6.615 | 0.418 | 0.606 |
| 2.771 | 3.678 | 3.095 | 2.632 | 3.809 | 0.475 | 0.606 |
| 3.965 | 4.785 | 3.979 | 4.571 | 3.922 | 0.452 | 0.606 |
| 3.984 | 3.601 | 3.681 | 4.263 | 3.862 | 0.437 | 0.606 |
| 6.116 | 7.093 | 5.888 | 7.223 | 7.238 | 0.489 | 0.606 |
| 9.545 | 9.702 | 9.855 | 9.216 | 9.292 | 0.349 | 0.606 |
| 8.615 | 7.313 | 8.632 | 5.965 | 6.329 | 0.675 | 0.606 |
| 7.792 | 8.248 | 6.503 | 8.412 | 8.324 | 0.467 | 0.606 |
| 4.095 | 3.533 | 3.579 | 2.431 | 2.613 | 0.453 | 0.606 |
| 2.183 | 2.884 | 2.520 | 2.447 | 2.424 | 0.609 | 0.606 |
| 1.613 | 2.456 | 2.296 | 1.889 | 2.079 | 0.415 | 0.606 |
| 4.490 | 5.007 | 4.425 | 4.834 | 4.378 | 0.498 | 0.606 |
| 6.786 | 7.051 | 7.694 | 6.810 | 6.784 | 0.453 | 0.606 |
| 5.304 | 5.934 | 5.269 | 6.625 | 6.576 | 0.646 | 0.606 |

|       |       |       |       |       |       |       |
|-------|-------|-------|-------|-------|-------|-------|
| 3.839 | 2.960 | 4.401 | 2.851 | 3.774 | 0.482 | 0.606 |
| 2.377 | 3.733 | 1.884 | 3.531 | 3.530 | 0.571 | 0.606 |
| 4.080 | 4.535 | 4.838 | 3.252 | 3.842 | 0.461 | 0.606 |
| 4.586 | 4.266 | 6.019 | 3.535 | 3.564 | 0.565 | 0.606 |
| 2.549 | 2.413 | 2.841 | 1.716 | 2.273 | 0.479 | 0.606 |
| 3.169 | 3.968 | 2.977 | 4.225 | 3.623 | 0.369 | 0.606 |
| 5.152 | 5.065 | 6.394 | 4.252 | 4.700 | 0.451 | 0.606 |
| 2.778 | 2.319 | 2.510 | 2.078 | 2.675 | 0.345 | 0.606 |
| 2.697 | 2.021 | 2.884 | 1.925 | 2.858 | 0.520 | 0.606 |
| 2.428 | 3.915 | 3.580 | 3.926 | 1.336 | 0.888 | 0.606 |
| 8.072 | 6.724 | 8.214 | 7.029 | 7.038 | 0.421 | 0.606 |
| 2.462 | 1.945 | 2.909 | 1.763 | 2.232 | 0.446 | 0.606 |
| 3.033 | 2.707 | 2.902 | 2.199 | 3.075 | 0.334 | 0.606 |
| 5.991 | 5.509 | 3.368 | 6.222 | 6.159 | 0.625 | 0.606 |
| 4.753 | 4.704 | 5.111 | 5.022 | 5.627 | 0.435 | 0.606 |
| 2.353 | 2.644 | 3.265 | 2.146 | 2.896 | 0.477 | 0.606 |
| 6.866 | 7.334 | 6.640 | 7.796 | 7.914 | 0.423 | 0.606 |
| 3.073 | 3.305 | 3.202 | 3.144 | 2.870 | 0.492 | 0.606 |
| 3.250 | 3.831 | 3.650 | 3.146 | 2.914 | 0.503 | 0.606 |
| 3.622 | 3.997 | 4.464 | 3.991 | 2.422 | 0.672 | 0.606 |
| 4.359 | 5.855 | 4.066 | 5.859 | 5.854 | 0.639 | 0.606 |
| 2.641 | 1.772 | 2.770 | 2.344 | 2.940 | 0.480 | 0.606 |
| 2.446 | 1.997 | 1.691 | 1.668 | 3.270 | 0.547 | 0.606 |
| 2.574 | 2.806 | 4.282 | 2.333 | 2.642 | 0.626 | 0.606 |
| 3.352 | 2.998 | 2.124 | 2.771 | 2.852 | 0.470 | 0.606 |
| 2.866 | 3.597 | 3.974 | 3.461 | 4.012 | 0.625 | 0.606 |
| 3.101 | 2.405 | 3.032 | 3.669 | 3.335 | 0.448 | 0.606 |
| 2.971 | 1.944 | 2.383 | 1.827 | 2.381 | 0.506 | 0.606 |
| 2.461 | 2.987 | 2.819 | 2.627 | 2.485 | 0.519 | 0.606 |
| 5.011 | 4.740 | 5.816 | 3.346 | 4.239 | 0.648 | 0.606 |
| 2.858 | 2.812 | 2.141 | 1.854 | 1.719 | 0.520 | 0.606 |
| 4.510 | 5.176 | 3.440 | 5.811 | 5.737 | 0.600 | 0.606 |
| 1.416 | 1.622 | 2.064 | 1.577 | 1.610 | 0.652 | 0.606 |
| 1.559 | 2.765 | 3.469 | 0.779 | 4.211 | 1.055 | 0.606 |
| 2.595 | 4.360 | 5.780 | 2.806 | 6.515 | 1.260 | 0.606 |
| 1.823 | 2.354 | 2.223 | 2.110 | 2.931 | 0.463 | 0.606 |
| 4.752 | 2.965 | 2.545 | 3.058 | 2.815 | 0.458 | 0.606 |
| 3.550 | 6.423 | 3.037 | 7.073 | 6.571 | 0.905 | 0.606 |
| 2.557 | 4.041 | 2.439 | 5.084 | 4.644 | 0.657 | 0.606 |
| 4.322 | 4.633 | 4.413 | 3.836 | 4.531 | 0.422 | 0.606 |
| 6.897 | 4.825 | 5.700 | 5.208 | 5.824 | 0.605 | 0.606 |
| 3.101 | 3.793 | 2.574 | 3.778 | 3.763 | 0.494 | 0.606 |
| 3.874 | 3.574 | 3.626 | 3.095 | 3.537 | 0.490 | 0.606 |
| 5.113 | 4.809 | 5.784 | 4.538 | 4.898 | 0.461 | 0.606 |
| 5.981 | 6.745 | 6.635 | 7.136 | 6.956 | 0.349 | 0.606 |
| 4.107 | 5.224 | 4.152 | 5.579 | 5.228 | 0.434 | 0.606 |
| 4.470 | 4.291 | 4.104 | 4.814 | 4.800 | 0.394 | 0.606 |
| 8.387 | 8.781 | 6.810 | 9.047 | 9.086 | 0.521 | 0.606 |
| 4.618 | 4.683 | 5.433 | 3.540 | 4.752 | 0.557 | 0.606 |
| 4.301 | 5.430 | 4.933 | 4.542 | 3.807 | 0.483 | 0.606 |

|       |       |       |       |       |       |       |
|-------|-------|-------|-------|-------|-------|-------|
| 2.996 | 2.951 | 3.043 | 2.802 | 2.592 | 0.359 | 0.606 |
| 5.188 | 5.188 | 6.117 | 5.808 | 5.713 | 0.356 | 0.606 |
| 4.844 | 4.902 | 5.623 | 4.296 | 4.514 | 0.384 | 0.606 |
| 4.868 | 3.521 | 6.194 | 2.645 | 3.317 | 0.701 | 0.606 |
| 3.872 | 2.593 | 2.534 | 3.226 | 3.361 | 0.503 | 0.606 |
| 5.185 | 4.306 | 6.259 | 4.797 | 4.315 | 0.477 | 0.606 |
| 4.649 | 4.989 | 5.151 | 4.267 | 4.683 | 0.430 | 0.606 |
| 4.748 | 2.947 | 4.538 | 3.259 | 3.318 | 0.579 | 0.606 |
| 4.305 | 3.231 | 3.006 | 3.360 | 3.953 | 0.527 | 0.606 |
| 2.760 | 3.552 | 4.048 | 3.608 | 3.790 | 0.562 | 0.606 |
| 6.644 | 6.890 | 6.624 | 7.240 | 7.119 | 0.350 | 0.606 |
| 6.146 | 6.516 | 5.276 | 6.948 | 6.569 | 0.389 | 0.606 |
| 3.263 | 2.730 | 3.524 | 2.373 | 3.220 | 0.364 | 0.606 |
| 4.480 | 4.360 | 4.528 | 4.494 | 4.053 | 0.389 | 0.606 |
| 5.327 | 4.889 | 5.269 | 3.675 | 4.802 | 0.497 | 0.606 |
| 3.068 | 3.866 | 3.997 | 3.362 | 4.032 | 0.468 | 0.606 |
| 4.981 | 5.411 | 4.544 | 5.622 | 5.498 | 0.385 | 0.606 |
| 4.418 | 4.251 | 4.407 | 5.066 | 5.044 | 0.384 | 0.606 |
| 4.961 | 5.485 | 3.234 | 5.782 | 5.889 | 0.620 | 0.606 |
| 3.830 | 3.957 | 2.994 | 3.685 | 3.969 | 0.367 | 0.606 |
| 3.720 | 2.916 | 1.525 | 2.352 | 2.381 | 0.565 | 0.606 |
| 4.152 | 4.288 | 2.000 | 4.492 | 4.350 | 0.576 | 0.606 |
| 5.891 | 5.555 | 1.839 | 5.904 | 6.014 | 0.973 | 0.606 |
| 2.003 | 2.509 | 1.150 | 2.359 | 3.107 | 0.438 | 0.606 |
| 7.774 | 6.312 | 6.812 | 7.006 | 7.153 | 0.580 | 0.606 |
| 3.881 | 4.164 | 3.586 | 3.323 | 3.731 | 0.426 | 0.606 |
| 4.935 | 3.964 | 4.726 | 2.776 | 3.340 | 0.607 | 0.606 |
| 6.685 | 6.054 | 6.782 | 6.064 | 6.088 | 0.368 | 0.606 |
| 3.719 | 3.157 | 4.523 | 1.813 | 2.237 | 0.733 | 0.606 |
| 5.035 | 5.679 | 4.825 | 5.722 | 5.858 | 0.373 | 0.606 |
| 6.656 | 7.010 | 6.025 | 6.888 | 6.988 | 0.346 | 0.606 |
| 4.580 | 5.487 | 4.997 | 5.566 | 5.592 | 0.358 | 0.606 |
| 3.846 | 4.599 | 4.027 | 4.483 | 5.046 | 0.376 | 0.606 |
| 6.060 | 6.604 | 5.532 | 6.875 | 6.807 | 0.507 | 0.606 |
| 4.533 | 4.662 | 5.804 | 3.600 | 3.714 | 0.477 | 0.606 |
| 3.443 | 3.388 | 4.287 | 3.254 | 3.017 | 0.402 | 0.606 |
| 2.373 | 1.725 | 1.984 | 2.249 | 2.096 | 0.590 | 0.606 |
| 5.444 | 4.815 | 4.387 | 5.682 | 5.203 | 0.395 | 0.606 |
| 4.447 | 5.373 | 4.271 | 5.737 | 4.773 | 0.407 | 0.606 |
| 2.907 | 3.566 | 2.995 | 2.807 | 3.258 | 0.447 | 0.606 |
| 3.361 | 2.801 | 3.925 | 2.846 | 3.018 | 0.425 | 0.606 |
| 7.660 | 8.420 | 5.259 | 9.238 | 8.569 | 0.925 | 0.606 |
| 2.847 | 4.089 | 3.350 | 4.875 | 4.176 | 0.491 | 0.606 |
| 5.909 | 5.284 | 7.045 | 3.897 | 4.219 | 0.681 | 0.606 |
| 5.058 | 5.539 | 5.000 | 5.826 | 5.509 | 0.397 | 0.606 |
| 4.111 | 3.179 | 4.205 | 3.446 | 4.145 | 0.493 | 0.606 |
| 4.896 | 3.801 | 2.561 | 4.033 | 4.004 | 0.563 | 0.606 |
| 5.725 | 5.947 | 5.885 | 6.040 | 5.741 | 0.345 | 0.606 |
| 4.931 | 5.811 | 5.505 | 6.069 | 6.086 | 0.362 | 0.606 |
| 4.989 | 4.578 | 5.202 | 4.883 | 4.903 | 0.378 | 0.606 |

|       |       |       |       |       |       |       |
|-------|-------|-------|-------|-------|-------|-------|
| 7.223 | 7.798 | 6.158 | 8.054 | 8.378 | 0.501 | 0.606 |
| 3.544 | 2.172 | 4.336 | 1.973 | 1.478 | 0.638 | 0.606 |
| 4.125 | 4.412 | 3.721 | 4.383 | 4.276 | 0.329 | 0.606 |
| 3.060 | 3.995 | 3.602 | 3.667 | 3.253 | 0.447 | 0.606 |
| 3.723 | 4.344 | 3.582 | 4.474 | 4.341 | 0.411 | 0.606 |
| 7.540 | 8.244 | 5.840 | 8.306 | 8.123 | 0.550 | 0.606 |
| 7.510 | 7.935 | 6.669 | 8.266 | 8.156 | 0.427 | 0.606 |
| 8.067 | 8.514 | 7.544 | 8.769 | 8.674 | 0.395 | 0.606 |
| 5.248 | 5.500 | 5.053 | 5.444 | 5.303 | 0.370 | 0.606 |
| 3.199 | 2.525 | 2.423 | 2.924 | 2.229 | 0.460 | 0.606 |
| 4.066 | 2.859 | 3.010 | 2.703 | 3.186 | 0.586 | 0.606 |
| 5.826 | 6.089 | 7.135 | 5.190 | 5.655 | 0.536 | 0.606 |
| 3.292 | 4.425 | 2.585 | 4.821 | 3.875 | 0.562 | 0.606 |
| 5.289 | 5.955 | 5.194 | 6.178 | 5.759 | 0.379 | 0.606 |
| 7.853 | 7.927 | 7.005 | 8.048 | 8.292 | 0.369 | 0.606 |
| 5.220 | 3.890 | 4.255 | 3.858 | 4.033 | 0.498 | 0.606 |
| 6.064 | 6.169 | 5.414 | 6.486 | 6.507 | 0.346 | 0.606 |
| 6.150 | 6.385 | 6.231 | 6.533 | 6.419 | 0.324 | 0.606 |
| 3.855 | 3.027 | 3.344 | 3.432 | 3.816 | 0.413 | 0.606 |
| 3.850 | 3.688 | 2.762 | 3.475 | 3.771 | 0.469 | 0.606 |
| 3.817 | 3.454 | 3.052 | 4.060 | 3.991 | 0.427 | 0.606 |
| 2.539 | 3.174 | 2.080 | 2.389 | 3.290 | 0.455 | 0.606 |
| 5.824 | 6.412 | 5.472 | 6.704 | 6.834 | 0.389 | 0.606 |
| 3.198 | 1.815 | 2.814 | 2.097 | 1.568 | 0.408 | 0.606 |
| 4.828 | 4.866 | 5.463 | 4.464 | 4.122 | 0.430 | 0.606 |
| 3.626 | 3.081 | 1.390 | 3.462 | 3.024 | 0.480 | 0.606 |
| 5.534 | 5.360 | 3.214 | 5.212 | 5.441 | 0.536 | 0.606 |
| 4.828 | 5.154 | 3.744 | 5.747 | 5.786 | 0.456 | 0.606 |
| 5.087 | 5.517 | 5.016 | 6.466 | 5.642 | 0.440 | 0.606 |
| 2.813 | 2.141 | 2.258 | 2.820 | 2.884 | 0.414 | 0.606 |
| 3.970 | 3.945 | 3.381 | 3.914 | 3.808 | 0.370 | 0.606 |
| 5.231 | 5.044 | 6.088 | 4.044 | 4.590 | 0.454 | 0.606 |
| 6.123 | 6.549 | 5.929 | 6.688 | 6.760 | 0.354 | 0.606 |
| 5.755 | 6.284 | 1.676 | 6.730 | 6.640 | 0.958 | 0.606 |
| 2.999 | 4.447 | 2.182 | 4.834 | 4.414 | 0.684 | 0.606 |
| 4.856 | 5.062 | 5.267 | 5.492 | 5.345 | 0.386 | 0.606 |
| 3.678 | 2.756 | 4.228 | 2.180 | 3.071 | 0.528 | 0.606 |
| 6.280 | 5.547 | 6.535 | 5.064 | 5.084 | 0.445 | 0.606 |
| 8.293 | 7.446 | 8.882 | 7.589 | 7.524 | 0.413 | 0.606 |
| 6.359 | 4.019 | 6.028 | 4.540 | 4.581 | 0.633 | 0.606 |
| 5.178 | 4.141 | 5.262 | 3.685 | 3.970 | 0.511 | 0.606 |
| 5.175 | 3.198 | 4.686 | 4.039 | 2.834 | 0.924 | 0.606 |
| 4.728 | 4.614 | 3.890 | 4.644 | 4.770 | 0.494 | 0.606 |
| 4.346 | 3.483 | 4.571 | 3.695 | 4.059 | 0.665 | 0.606 |
| 5.204 | 4.747 | 4.408 | 4.963 | 5.343 | 0.372 | 0.606 |
| 2.368 | 3.195 | 2.700 | 3.681 | 3.847 | 0.787 | 0.606 |
| 4.154 | 3.569 | 3.881 | 3.644 | 3.345 | 0.762 | 0.606 |
| 6.346 | 6.353 | 6.465 | 6.650 | 6.769 | 1.918 | 0.606 |
| 5.733 | 5.064 | 5.819 | 4.937 | 5.261 | 0.376 | 0.606 |
| 8.516 | 7.733 | 9.549 | 6.389 | 6.490 | 0.645 | 0.606 |

|       |       |        |       |       |       |       |
|-------|-------|--------|-------|-------|-------|-------|
| 6.726 | 7.094 | 5.824  | 7.232 | 7.174 | 0.439 | 0.606 |
| 2.072 | 3.149 | 1.690  | 2.286 | 1.724 | 0.458 | 0.606 |
| 3.268 | 2.238 | 2.186  | 3.244 | 3.765 | 0.527 | 0.606 |
| 2.400 | 2.462 | 2.433  | 1.799 | 2.400 | 0.535 | 0.606 |
| 3.660 | 3.863 | 1.845  | 4.808 | 4.809 | 0.625 | 0.606 |
| 2.274 | 2.924 | 1.886  | 2.550 | 2.034 | 0.762 | 0.606 |
| 7.403 | 7.640 | 6.459  | 6.444 | 6.789 | 0.425 | 0.606 |
| 4.482 | 5.093 | 4.781  | 3.527 | 4.375 | 0.478 | 0.606 |
| 4.350 | 4.734 | 3.897  | 3.736 | 4.330 | 0.536 | 0.606 |
| 6.518 | 7.376 | 6.567  | 7.695 | 7.473 | 0.405 | 0.606 |
| 3.533 | 4.346 | 2.580  | 4.811 | 4.265 | 0.585 | 0.606 |
| 4.956 | 5.153 | 4.242  | 5.215 | 5.142 | 0.363 | 0.606 |
| 6.118 | 6.574 | 4.237  | 6.685 | 6.934 | 0.597 | 0.606 |
| 3.854 | 4.435 | 3.404  | 4.601 | 4.315 | 0.454 | 0.606 |
| 3.530 | 3.296 | 3.745  | 3.640 | 4.045 | 0.522 | 0.606 |
| 5.692 | 4.821 | 5.076  | 5.060 | 5.239 | 1.638 | 0.606 |
| 5.641 | 4.649 | 4.905  | 4.833 | 5.060 | 1.532 | 0.606 |
| 5.440 | 5.845 | 5.337  | 5.959 | 6.067 | 0.365 | 0.606 |
| 7.778 | 8.028 | 10.363 | 7.412 | 8.938 | 0.633 | 0.606 |
| 4.524 | 4.690 | 4.995  | 4.502 | 3.818 | 0.394 | 0.606 |
| 4.149 | 4.616 | 4.156  | 4.066 | 4.205 | 0.344 | 0.606 |
| 4.524 | 3.691 | 5.292  | 1.916 | 2.906 | 0.759 | 0.606 |
| 7.616 | 8.320 | 8.673  | 6.042 | 7.378 | 0.704 | 0.606 |
| 2.596 | 2.656 | 2.296  | 3.012 | 3.092 | 0.499 | 0.606 |
| 4.306 | 4.626 | 4.430  | 5.206 | 4.723 | 0.328 | 0.606 |
| 2.415 | 2.916 | 2.368  | 3.393 | 2.835 | 0.365 | 0.606 |
| 5.359 | 4.478 | 5.703  | 3.711 | 4.689 | 0.483 | 0.606 |
| 5.547 | 6.130 | 4.713  | 6.124 | 5.831 | 0.491 | 0.606 |
| 4.274 | 4.372 | 5.281  | 4.109 | 3.639 | 0.437 | 0.606 |
| 4.638 | 3.951 | 4.719  | 2.886 | 4.154 | 0.584 | 0.606 |
| 5.127 | 5.778 | 4.988  | 5.811 | 5.957 | 0.402 | 0.606 |
| 5.746 | 5.870 | 6.083  | 4.820 | 5.153 | 0.453 | 0.606 |
| 6.210 | 6.923 | 5.296  | 5.751 | 5.522 | 0.503 | 0.606 |
| 5.927 | 5.626 | 6.120  | 6.408 | 6.013 | 0.342 | 0.606 |
| 6.078 | 6.081 | 6.052  | 6.589 | 6.471 | 0.392 | 0.606 |
| 6.836 | 7.179 | 5.722  | 7.149 | 7.069 | 0.418 | 0.606 |
| 2.842 | 3.156 | 2.410  | 4.175 | 2.745 | 0.579 | 0.606 |
| 6.628 | 7.304 | 3.418  | 7.509 | 7.186 | 0.904 | 0.606 |
| 4.566 | 5.251 | 3.441  | 5.827 | 5.557 | 0.623 | 0.606 |
| 4.179 | 4.626 | 4.157  | 5.118 | 4.895 | 0.363 | 0.606 |
| 3.087 | 2.409 | 3.769  | 1.643 | 2.512 | 0.527 | 0.606 |
| 6.801 | 7.136 | 7.003  | 7.404 | 7.635 | 0.367 | 0.606 |
| 3.582 | 3.836 | 2.983  | 4.166 | 4.021 | 0.354 | 0.606 |
| 7.597 | 8.194 | 7.771  | 8.178 | 8.088 | 0.334 | 0.606 |
| 7.572 | 7.764 | 7.625  | 7.870 | 8.003 | 0.330 | 0.606 |
| 4.131 | 4.181 | 4.170  | 3.991 | 3.723 | 0.382 | 0.606 |
| 4.983 | 5.167 | 3.239  | 5.475 | 5.256 | 0.515 | 0.606 |
| 4.128 | 2.628 | 2.393  | 3.457 | 3.504 | 0.460 | 0.606 |
| 4.534 | 5.394 | 5.197  | 5.490 | 5.431 | 0.480 | 0.606 |
| 7.574 | 7.431 | 6.153  | 7.796 | 7.689 | 0.428 | 0.606 |

|        |       |        |       |       |       |       |
|--------|-------|--------|-------|-------|-------|-------|
| 5.149  | 5.553 | 5.009  | 5.546 | 5.615 | 0.335 | 0.606 |
| 3.974  | 3.502 | 4.210  | 4.056 | 3.362 | 0.429 | 0.606 |
| 2.856  | 3.660 | 4.049  | 2.410 | 3.615 | 0.643 | 0.606 |
| 6.354  | 5.805 | 6.793  | 6.421 | 6.792 | 0.482 | 0.606 |
| 5.677  | 6.108 | 5.685  | 6.306 | 6.443 | 0.446 | 0.606 |
| 3.443  | 3.298 | 4.797  | 2.993 | 2.940 | 0.533 | 0.606 |
| 4.218  | 4.846 | 4.222  | 4.910 | 4.701 | 0.349 | 0.606 |
| 10.257 | 8.836 | 10.753 | 7.507 | 7.848 | 0.745 | 0.606 |
| 6.536  | 6.947 | 6.046  | 7.033 | 7.203 | 0.404 | 0.606 |
| 5.483  | 5.749 | 4.769  | 5.439 | 5.506 | 0.380 | 0.606 |
| 3.955  | 3.885 | 3.346  | 3.640 | 3.550 | 0.451 | 0.606 |
| 5.673  | 4.548 | 4.795  | 4.834 | 4.166 | 0.487 | 0.606 |
| 4.155  | 2.885 | 1.743  | 2.319 | 1.541 | 0.575 | 0.606 |
| 6.085  | 4.639 | 5.058  | 4.788 | 4.358 | 0.506 | 0.606 |
| 6.309  | 8.395 | 3.689  | 8.463 | 8.398 | 0.990 | 0.606 |
| 6.990  | 7.251 | 3.115  | 7.744 | 7.651 | 1.018 | 0.606 |
| 3.926  | 4.181 | 4.630  | 3.112 | 2.926 | 0.509 | 0.606 |
| 4.043  | 5.634 | 2.615  | 6.243 | 5.932 | 0.843 | 0.606 |
| 6.864  | 6.185 | 7.552  | 5.173 | 5.722 | 0.477 | 0.606 |
| 6.108  | 5.778 | 6.891  | 5.278 | 5.478 | 0.439 | 0.606 |
| 2.942  | 2.209 | 3.040  | 1.720 | 2.127 | 0.457 | 0.606 |
| 5.168  | 6.525 | 3.279  | 6.961 | 6.650 | 0.849 | 0.606 |
| 6.452  | 6.815 | 5.237  | 7.336 | 7.156 | 0.543 | 0.606 |
| 7.274  | 7.448 | 4.435  | 7.742 | 7.723 | 0.733 | 0.606 |
| 3.739  | 4.299 | 4.019  | 3.351 | 3.695 | 0.416 | 0.606 |
| 3.838  | 4.134 | 4.479  | 3.364 | 3.426 | 0.389 | 0.606 |
| 5.682  | 6.390 | 5.880  | 6.753 | 6.461 | 0.400 | 0.606 |
| 2.764  | 3.875 | 3.471  | 5.127 | 4.201 | 0.480 | 0.606 |
| 3.962  | 3.785 | 3.635  | 4.458 | 3.923 | 0.382 | 0.606 |
| 3.958  | 3.539 | 3.863  | 4.290 | 4.059 | 0.378 | 0.606 |
| 8.655  | 8.974 | 8.578  | 9.129 | 9.266 | 0.298 | 0.606 |
| 4.701  | 4.873 | 3.974  | 5.397 | 5.632 | 0.419 | 0.606 |
| 4.227  | 4.573 | 3.471  | 4.243 | 4.561 | 0.356 | 0.606 |
| 6.620  | 6.622 | 6.009  | 7.038 | 6.982 | 0.443 | 0.606 |
| 3.506  | 3.073 | 4.199  | 2.398 | 2.864 | 0.607 | 0.606 |
| 7.779  | 8.198 | 7.089  | 8.140 | 8.317 | 0.352 | 0.606 |
| 5.232  | 3.966 | 4.358  | 4.596 | 4.514 | 0.459 | 0.606 |
| 5.137  | 4.044 | 4.457  | 4.656 | 4.551 | 0.464 | 0.606 |
| 5.210  | 4.302 | 4.269  | 4.431 | 4.407 | 0.463 | 0.606 |
| 5.263  | 3.838 | 3.223  | 4.474 | 4.057 | 0.507 | 0.606 |
| 6.315  | 7.005 | 6.513  | 7.271 | 7.366 | 0.350 | 0.606 |
| 4.746  | 4.554 | 2.879  | 4.871 | 4.981 | 0.565 | 0.606 |
| 4.639  | 4.952 | 4.580  | 5.639 | 5.034 | 0.409 | 0.606 |
| 7.920  | 7.810 | 8.198  | 7.860 | 7.913 | 0.327 | 0.606 |
| 4.065  | 4.450 | 3.357  | 3.151 | 3.153 | 0.626 | 0.606 |
| 6.202  | 6.335 | 6.340  | 6.664 | 6.812 | 0.302 | 0.606 |
| 5.556  | 4.664 | 6.143  | 4.804 | 4.692 | 0.429 | 0.606 |
| 3.183  | 4.135 | 2.274  | 4.283 | 4.038 | 0.512 | 0.606 |
| 6.840  | 6.112 | 6.249  | 6.020 | 6.355 | 0.400 | 0.606 |
| 8.454  | 7.450 | 8.968  | 6.829 | 6.985 | 0.496 | 0.606 |

|       |       |       |       |       |       |       |
|-------|-------|-------|-------|-------|-------|-------|
| 6.379 | 6.481 | 6.548 | 7.215 | 7.028 | 1.930 | 0.606 |
| 2.614 | 3.861 | 3.422 | 3.385 | 3.675 | 0.426 | 0.606 |
| 5.244 | 6.033 | 5.888 | 6.129 | 6.038 | 0.367 | 0.606 |
| 7.063 | 5.930 | 6.707 | 5.967 | 6.254 | 0.398 | 0.606 |
| 3.094 | 1.748 | 2.078 | 1.346 | 1.267 | 0.770 | 0.606 |
| 4.952 | 4.542 | 5.314 | 3.902 | 4.138 | 1.714 | 0.606 |
| 4.299 | 3.690 | 3.218 | 4.950 | 3.565 | 0.507 | 0.606 |
| 9.308 | 8.090 | 7.061 | 8.394 | 8.882 | 0.613 | 0.606 |
| 7.921 | 8.674 | 7.477 | 8.160 | 8.550 | 0.329 | 0.606 |
| 7.646 | 7.424 | 8.515 | 6.504 | 6.766 | 0.462 | 0.606 |
| 6.421 | 6.450 | 6.135 | 6.798 | 7.028 | 0.425 | 0.606 |
| 4.641 | 5.035 | 5.250 | 4.303 | 5.010 | 0.375 | 0.606 |
| 4.047 | 4.247 | 4.625 | 3.807 | 4.136 | 0.590 | 0.606 |
| 5.307 | 4.386 | 4.789 | 4.034 | 4.434 | 0.410 | 0.606 |
| 6.140 | 5.421 | 5.931 | 4.946 | 4.753 | 0.415 | 0.606 |
| 5.939 | 5.541 | 5.960 | 5.151 | 5.108 | 0.399 | 0.606 |
| 6.733 | 5.768 | 6.010 | 5.756 | 5.538 | 0.404 | 0.606 |
| 9.329 | 7.255 | 6.335 | 7.288 | 7.413 | 0.656 | 0.606 |
| 5.033 | 4.944 | 4.819 | 3.512 | 4.272 | 0.553 | 0.606 |
| 3.255 | 2.319 | 2.007 | 2.870 | 3.230 | 0.390 | 0.606 |
| 1.820 | 2.995 | 4.080 | 2.713 | 2.940 | 0.489 | 0.606 |
| 4.522 | 3.525 | 4.619 | 3.493 | 5.286 | 0.640 | 0.606 |
| 6.730 | 6.092 | 7.927 | 5.873 | 6.030 | 0.554 | 0.606 |
| 1.294 | 1.126 | 1.666 | 1.372 | 1.305 | 0.475 | 0.606 |
| 6.241 | 5.967 | 5.509 | 5.884 | 6.233 | 0.478 | 0.606 |
| 6.465 | 6.819 | 6.473 | 7.366 | 7.414 | 0.366 | 0.606 |
| 4.152 | 4.438 | 4.307 | 5.071 | 4.694 | 0.378 | 0.606 |
| 3.430 | 3.494 | 2.298 | 3.153 | 4.063 | 0.514 | 0.606 |
| 9.044 | 9.000 | 8.195 | 9.080 | 9.327 | 0.334 | 0.606 |
| 4.925 | 6.382 | 5.224 | 6.527 | 4.187 | 0.884 | 0.606 |
| 2.806 | 2.965 | 3.351 | 3.076 | 3.286 | 0.439 | 0.606 |
| 6.556 | 6.011 | 7.229 | 5.639 | 6.065 | 0.380 | 0.606 |
| 5.204 | 5.646 | 3.532 | 5.323 | 5.473 | 0.644 | 0.606 |
| 3.913 | 2.758 | 2.325 | 2.394 | 2.732 | 0.435 | 0.606 |
| 5.007 | 5.589 | 5.249 | 5.065 | 5.723 | 0.384 | 0.606 |
| 4.139 | 4.457 | 4.010 | 3.630 | 4.264 | 0.522 | 0.606 |
| 4.679 | 5.140 | 2.639 | 5.753 | 5.607 | 0.728 | 0.606 |
| 2.670 | 5.123 | 3.243 | 5.385 | 5.409 | 0.700 | 0.606 |
| 4.834 | 4.099 | 5.373 | 3.332 | 4.286 | 0.479 | 0.606 |
| 1.704 | 2.543 | 2.756 | 2.018 | 2.066 | 0.393 | 0.606 |
| 4.271 | 4.609 | 4.374 | 4.354 | 4.473 | 0.320 | 0.606 |
| 2.253 | 2.706 | 3.172 | 1.961 | 2.320 | 0.781 | 0.606 |
| 1.890 | 2.360 | 2.265 | 2.461 | 2.451 | 0.735 | 0.606 |
| 6.153 | 6.217 | 5.873 | 6.013 | 6.234 | 0.402 | 0.606 |
| 6.189 | 6.658 | 5.291 | 7.168 | 7.021 | 0.434 | 0.606 |
| 4.361 | 4.525 | 4.223 | 4.533 | 4.758 | 0.382 | 0.606 |
| 5.068 | 5.573 | 5.174 | 5.567 | 5.868 | 0.374 | 0.606 |
| 8.993 | 9.299 | 8.743 | 9.478 | 9.549 | 0.332 | 0.606 |
| 6.342 | 6.580 | 6.106 | 6.940 | 7.058 | 0.378 | 0.606 |
| 3.015 | 3.056 | 1.594 | 3.008 | 2.905 | 0.494 | 0.606 |

|       |       |       |       |       |       |       |
|-------|-------|-------|-------|-------|-------|-------|
| 3.805 | 3.691 | 3.397 | 3.673 | 4.188 | 0.369 | 0.606 |
| 4.467 | 4.097 | 6.252 | 2.998 | 3.378 | 0.619 | 0.606 |
| 2.497 | 2.838 | 1.921 | 3.173 | 3.952 | 0.504 | 0.606 |
| 4.974 | 7.031 | 7.141 | 4.782 | 5.970 | 0.952 | 0.606 |
| 3.235 | 4.254 | 0.822 | 4.134 | 4.474 | 0.816 | 0.606 |
| 6.764 | 8.466 | 3.352 | 8.679 | 8.405 | 1.226 | 0.606 |
| 3.509 | 5.014 | 1.165 | 5.794 | 5.874 | 0.975 | 0.606 |
| 6.607 | 6.365 | 6.750 | 6.540 | 6.658 | 0.360 | 0.606 |
| 5.008 | 6.311 | 2.558 | 6.211 | 6.254 | 0.785 | 0.606 |
| 3.657 | 2.721 | 2.143 | 3.238 | 3.882 | 0.437 | 0.606 |
| 2.796 | 2.439 | 2.855 | 2.728 | 2.886 | 0.426 | 0.606 |
| 6.859 | 7.362 | 7.119 | 7.356 | 7.671 | 0.349 | 0.606 |
| 5.474 | 3.344 | 3.631 | 3.886 | 3.439 | 0.875 | 0.606 |
| 1.829 | 1.720 | 1.988 | 1.382 | 1.286 | 0.491 | 0.606 |
| 4.595 | 2.728 | 2.734 | 3.307 | 2.990 | 0.696 | 0.606 |
| 4.749 | 2.740 | 4.348 | 3.312 | 4.026 | 0.825 | 0.606 |
| 5.244 | 5.536 | 6.346 | 3.681 | 3.995 | 0.574 | 0.606 |
| 4.506 | 3.500 | 2.877 | 3.843 | 4.184 | 0.618 | 0.606 |
| 6.325 | 5.812 | 5.158 | 4.812 | 4.838 | 0.479 | 0.606 |
| 2.928 | 1.583 | 1.080 | 1.544 | 1.562 | 0.477 | 0.606 |
| 4.867 | 3.983 | 3.147 | 2.939 | 3.537 | 0.535 | 0.606 |
| 3.827 | 3.745 | 2.086 | 4.028 | 3.340 | 0.485 | 0.606 |
| 4.005 | 3.911 | 2.486 | 4.425 | 3.675 | 0.491 | 0.606 |
| 5.079 | 5.540 | 3.260 | 5.790 | 5.753 | 0.539 | 0.606 |
| 4.049 | 5.053 | 2.540 | 5.588 | 5.684 | 0.735 | 0.606 |
| 5.724 | 6.004 | 5.324 | 4.816 | 6.207 | 0.454 | 0.606 |
| 4.843 | 5.230 | 5.476 | 5.040 | 5.523 | 0.342 | 0.606 |
| 4.091 | 4.749 | 4.679 | 3.822 | 4.376 | 0.487 | 0.606 |
| 6.115 | 7.576 | 6.213 | 7.780 | 7.697 | 0.501 | 0.606 |
| 8.324 | 8.043 | 9.082 | 7.332 | 7.712 | 0.415 | 0.606 |
| 3.127 | 2.898 | 2.678 | 2.621 | 3.200 | 0.413 | 0.606 |
| 4.979 | 6.125 | 5.761 | 5.193 | 5.521 | 0.607 | 0.606 |
| 5.970 | 5.080 | 6.108 | 4.894 | 5.513 | 0.414 | 0.606 |
| 7.826 | 8.234 | 7.688 | 8.433 | 8.612 | 0.382 | 0.606 |
| 1.732 | 1.779 | 1.967 | 2.039 | 1.705 | 0.398 | 0.606 |
| 7.302 | 7.051 | 7.103 | 6.947 | 6.905 | 0.300 | 0.606 |
| 2.428 | 1.928 | 3.442 | 2.471 | 2.289 | 0.502 | 0.606 |
| 6.172 | 6.187 | 6.976 | 6.049 | 5.736 | 0.339 | 0.606 |
| 5.278 | 7.169 | 2.902 | 7.359 | 6.966 | 0.979 | 0.606 |
| 6.694 | 6.246 | 7.594 | 6.082 | 6.459 | 0.415 | 0.606 |
| 5.400 | 5.269 | 5.334 | 5.338 | 4.985 | 0.387 | 0.606 |
| 3.679 | 3.075 | 3.836 | 2.362 | 2.506 | 0.471 | 0.606 |
| 3.350 | 4.514 | 2.943 | 4.096 | 4.668 | 0.486 | 0.606 |
| 6.725 | 5.938 | 6.425 | 5.976 | 6.237 | 0.450 | 0.606 |
| 4.283 | 2.924 | 3.228 | 3.693 | 3.301 | 0.537 | 0.606 |
| 4.782 | 3.478 | 3.004 | 4.216 | 3.880 | 0.805 | 0.606 |
| 6.474 | 7.175 | 5.290 | 7.577 | 7.646 | 0.569 | 0.606 |
| 6.192 | 6.321 | 5.880 | 6.613 | 6.499 | 0.364 | 0.606 |
| 5.845 | 5.809 | 5.573 | 6.275 | 6.215 | 0.365 | 0.606 |
| 6.643 | 6.997 | 6.278 | 7.055 | 7.087 | 0.367 | 0.606 |



|       |       |       |       |       |       |       |
|-------|-------|-------|-------|-------|-------|-------|
| 6.445 | 6.769 | 5.788 | 6.985 | 7.062 | 0.379 | 0.606 |
| 3.676 | 2.363 | 3.384 | 2.241 | 2.241 | 0.644 | 0.606 |
| 7.792 | 8.440 | 7.337 | 8.772 | 8.614 | 0.455 | 0.606 |
| 6.846 | 5.048 | 6.331 | 4.935 | 5.028 | 0.626 | 0.606 |
| 4.575 | 4.229 | 4.036 | 4.366 | 4.392 | 0.406 | 0.606 |
| 4.111 | 4.696 | 3.515 | 4.490 | 4.623 | 0.374 | 0.606 |
| 4.763 | 4.238 | 6.021 | 4.372 | 4.451 | 0.477 | 0.606 |
| 3.702 | 2.251 | 1.777 | 2.612 | 2.839 | 0.796 | 0.606 |
| 2.690 | 2.608 | 1.378 | 2.999 | 2.603 | 0.476 | 0.606 |
| 7.722 | 8.193 | 7.459 | 8.287 | 8.111 | 0.321 | 0.606 |
| 2.635 | 2.568 | 2.805 | 2.789 | 3.042 | 0.430 | 0.606 |
| 4.903 | 4.858 | 4.705 | 5.256 | 5.328 | 0.379 | 0.606 |
| 5.013 | 3.019 | 3.871 | 3.578 | 2.928 | 0.884 | 0.606 |
| 3.032 | 2.304 | 2.777 | 2.508 | 2.796 | 0.331 | 0.606 |
| 4.203 | 5.269 | 3.853 | 5.879 | 5.649 | 0.516 | 0.606 |
| 4.943 | 3.988 | 5.323 | 3.728 | 3.262 | 0.581 | 0.606 |
| 3.537 | 4.848 | 1.092 | 6.053 | 5.995 | 1.009 | 0.606 |
| 4.588 | 4.208 | 6.053 | 3.063 | 3.483 | 0.621 | 0.606 |
| 6.077 | 6.769 | 5.815 | 6.819 | 6.617 | 0.338 | 0.606 |
| 3.646 | 6.331 | 3.293 | 6.263 | 6.370 | 0.713 | 0.606 |
| 6.338 | 6.489 | 6.672 | 5.528 | 6.283 | 0.384 | 0.606 |
| 2.051 | 2.258 | 2.000 | 2.582 | 2.116 | 0.417 | 0.606 |
| 6.369 | 5.946 | 5.692 | 5.526 | 6.316 | 0.365 | 0.606 |
| 8.778 | 8.120 | 9.093 | 7.934 | 7.806 | 0.354 | 0.606 |
| 5.184 | 5.841 | 4.002 | 6.017 | 5.834 | 0.551 | 0.606 |
| 5.126 | 4.934 | 4.528 | 5.263 | 5.330 | 0.407 | 0.606 |
| 3.442 | 4.402 | 2.431 | 4.925 | 4.534 | 0.539 | 0.606 |
| 3.409 | 4.010 | 2.831 | 3.673 | 4.626 | 0.564 | 0.606 |
| 3.288 | 2.941 | 2.929 | 2.605 | 2.646 | 0.315 | 0.606 |
| 3.807 | 4.062 | 3.888 | 4.432 | 3.710 | 0.529 | 0.606 |
| 3.449 | 3.386 | 2.970 | 2.775 | 3.269 | 0.485 | 0.606 |
| 9.282 | 8.605 | 9.593 | 7.613 | 8.099 | 0.514 | 0.606 |
| 5.925 | 5.297 | 6.178 | 5.122 | 5.025 | 0.380 | 0.606 |
| 2.542 | 3.668 | 1.989 | 4.476 | 4.001 | 0.505 | 0.606 |
| 5.758 | 5.125 | 5.166 | 5.292 | 5.507 | 0.314 | 0.606 |
| 3.982 | 3.280 | 4.084 | 3.381 | 3.576 | 0.389 | 0.606 |
| 6.816 | 6.037 | 5.615 | 5.888 | 6.564 | 0.524 | 0.606 |
| 5.822 | 6.083 | 6.006 | 6.225 | 6.157 | 0.409 | 0.606 |
| 2.051 | 1.722 | 1.849 | 2.077 | 1.658 | 0.446 | 0.606 |
| 2.494 | 2.178 | 1.795 | 1.776 | 1.748 | 0.533 | 0.606 |
| 1.330 | 1.308 | 1.433 | 1.150 | 1.209 | 3.327 | 0.606 |
| 4.059 | 5.121 | 3.274 | 5.044 | 5.476 | 0.493 | 0.606 |
| 3.949 | 5.387 | 2.235 | 5.663 | 5.892 | 0.710 | 0.606 |
| 5.268 | 6.534 | 3.515 | 6.629 | 6.469 | 0.656 | 0.606 |
| 4.254 | 4.196 | 3.393 | 4.830 | 4.216 | 0.412 | 0.606 |
| 3.632 | 3.387 | 2.782 | 4.109 | 3.500 | 0.514 | 0.606 |
| 2.753 | 2.631 | 1.467 | 3.234 | 2.296 | 0.476 | 0.606 |
| 2.401 | 2.696 | 3.015 | 2.618 | 2.613 | 0.373 | 0.606 |
| 2.664 | 2.890 | 2.715 | 3.575 | 3.767 | 0.448 | 0.606 |
| 5.949 | 5.691 | 6.851 | 4.907 | 5.735 | 0.434 | 0.606 |

|        |        |       |        |        |       |       |
|--------|--------|-------|--------|--------|-------|-------|
| 7.622  | 7.691  | 6.873 | 8.223  | 8.214  | 0.335 | 0.606 |
| 3.834  | 4.759  | 5.219 | 3.895  | 4.525  | 0.461 | 0.606 |
| 3.190  | 3.064  | 1.887 | 3.597  | 3.983  | 0.450 | 0.606 |
| 5.722  | 5.354  | 4.750 | 4.787  | 5.594  | 0.443 | 0.606 |
| 4.475  | 3.978  | 5.338 | 4.512  | 4.213  | 0.417 | 0.606 |
| 3.591  | 2.387  | 3.382 | 2.403  | 2.884  | 0.407 | 0.606 |
| 4.005  | 3.657  | 4.738 | 3.886  | 2.038  | 0.692 | 0.606 |
| 3.154  | 4.267  | 3.844 | 3.099  | 3.919  | 0.492 | 0.606 |
| 3.059  | 3.654  | 3.400 | 3.344  | 2.810  | 0.475 | 0.606 |
| 3.260  | 1.917  | 2.538 | 3.356  | 2.448  | 0.437 | 0.606 |
| 4.979  | 4.531  | 5.020 | 4.617  | 4.734  | 0.336 | 0.606 |
| 4.958  | 4.715  | 5.032 | 5.608  | 5.182  | 0.344 | 0.606 |
| 8.022  | 8.223  | 8.615 | 7.396  | 7.385  | 0.364 | 0.606 |
| 3.702  | 4.237  | 4.835 | 4.019  | 3.998  | 0.573 | 0.606 |
| 1.746  | 1.835  | 2.274 | 1.949  | 2.222  | 0.505 | 0.606 |
| 4.844  | 5.775  | 4.972 | 4.788  | 5.523  | 0.436 | 0.606 |
| 4.903  | 4.548  | 5.015 | 3.837  | 4.114  | 0.360 | 0.606 |
| 6.800  | 6.971  | 7.551 | 7.202  | 7.074  | 0.360 | 0.606 |
| 7.437  | 7.831  | 7.544 | 8.146  | 7.904  | 0.346 | 0.606 |
| 4.111  | 4.959  | 4.125 | 5.142  | 5.052  | 0.484 | 0.606 |
| 3.469  | 3.932  | 3.633 | 3.517  | 3.611  | 0.408 | 0.606 |
| 3.758  | 2.307  | 2.518 | 4.559  | 4.214  | 0.641 | 0.606 |
| 3.311  | 2.651  | 2.953 | 3.183  | 3.440  | 0.437 | 0.606 |
| 3.255  | 4.522  | 4.375 | 4.259  | 3.884  | 0.620 | 0.606 |
| 3.140  | 4.948  | 3.673 | 4.524  | 4.469  | 0.491 | 0.606 |
| 7.508  | 8.413  | 7.973 | 8.386  | 8.372  | 0.370 | 0.606 |
| 4.027  | 4.817  | 4.309 | 4.279  | 4.731  | 0.430 | 0.606 |
| 6.533  | 7.101  | 6.796 | 6.459  | 6.700  | 0.373 | 0.606 |
| 7.057  | 7.139  | 6.771 | 7.510  | 7.464  | 0.334 | 0.606 |
| 10.174 | 10.355 | 8.479 | 10.297 | 10.402 | 0.516 | 0.606 |
| 5.002  | 5.357  | 4.242 | 5.330  | 5.412  | 0.429 | 0.606 |
| 3.270  | 3.035  | 3.512 | 3.199  | 2.896  | 0.500 | 0.606 |
| 5.442  | 6.153  | 5.944 | 6.766  | 6.649  | 0.368 | 0.606 |
| 4.716  | 5.167  | 4.845 | 4.656  | 5.072  | 0.433 | 0.606 |
| 3.381  | 4.687  | 1.141 | 4.216  | 5.014  | 1.082 | 0.606 |
| 4.262  | 4.144  | 5.399 | 4.516  | 4.645  | 0.351 | 0.606 |
| 2.956  | 4.552  | 1.173 | 5.049  | 4.673  | 0.751 | 0.606 |
| 3.882  | 3.203  | 4.046 | 3.567  | 2.866  | 0.402 | 0.606 |
| 3.154  | 2.523  | 4.314 | 3.307  | 2.518  | 0.717 | 0.606 |
| 5.022  | 5.746  | 6.259 | 5.858  | 5.186  | 0.567 | 0.606 |
| 5.853  | 6.804  | 5.892 | 7.415  | 6.947  | 0.411 | 0.606 |
| 6.810  | 5.577  | 7.334 | 5.542  | 5.922  | 0.480 | 0.606 |
| 4.210  | 3.183  | 5.877 | 3.294  | 4.192  | 0.730 | 0.606 |
| 5.809  | 6.002  | 5.812 | 6.192  | 6.194  | 0.373 | 0.606 |
| 4.534  | 5.097  | 4.752 | 5.170  | 5.242  | 0.339 | 0.606 |
| 6.232  | 5.301  | 6.755 | 5.066  | 5.501  | 0.433 | 0.606 |
| 4.903  | 4.821  | 5.158 | 4.672  | 4.541  | 0.425 | 0.606 |
| 4.656  | 2.637  | 3.736 | 3.894  | 2.857  | 0.534 | 0.606 |
| 7.079  | 7.331  | 7.475 | 7.661  | 7.301  | 0.320 | 0.606 |
| 4.908  | 5.116  | 5.646 | 5.261  | 5.737  | 0.360 | 0.606 |

|       |       |       |       |       |       |       |
|-------|-------|-------|-------|-------|-------|-------|
| 4.608 | 4.804 | 5.712 | 4.314 | 4.006 | 0.411 | 0.606 |
| 3.715 | 3.640 | 2.959 | 4.539 | 3.662 | 0.427 | 0.606 |
| 3.228 | 3.982 | 3.716 | 3.875 | 4.659 | 0.403 | 0.606 |
| 6.741 | 6.634 | 6.060 | 7.338 | 7.243 | 0.392 | 0.606 |
| 3.859 | 3.895 | 4.147 | 3.718 | 3.137 | 0.378 | 0.606 |
| 5.582 | 5.957 | 4.615 | 6.613 | 6.122 | 0.438 | 0.606 |
| 5.438 | 5.829 | 4.388 | 6.124 | 5.860 | 0.478 | 0.606 |
| 6.969 | 5.902 | 6.756 | 5.581 | 6.329 | 0.460 | 0.606 |
| 6.588 | 6.049 | 2.342 | 6.404 | 5.808 | 0.972 | 0.606 |
| 7.288 | 6.495 | 7.578 | 5.887 | 5.700 | 0.440 | 0.606 |
| 4.374 | 4.184 | 4.652 | 3.394 | 3.691 | 0.388 | 0.606 |
| 6.329 | 6.460 | 4.999 | 7.098 | 7.086 | 0.483 | 0.606 |
| 4.949 | 3.482 | 4.680 | 4.606 | 3.773 | 0.553 | 0.606 |
| 3.715 | 3.830 | 4.077 | 3.010 | 3.021 | 0.437 | 0.606 |
| 4.812 | 5.312 | 4.571 | 5.491 | 4.988 | 0.453 | 0.606 |
| 6.861 | 6.292 | 7.071 | 6.604 | 5.890 | 0.375 | 0.606 |
| 7.891 | 7.258 | 8.978 | 6.521 | 6.661 | 0.547 | 0.606 |
| 4.077 | 3.586 | 6.297 | 3.628 | 3.422 | 0.682 | 0.606 |
| 6.563 | 7.013 | 5.850 | 7.538 | 7.487 | 0.414 | 0.606 |
| 4.014 | 4.640 | 3.236 | 5.057 | 4.632 | 0.436 | 0.606 |
| 2.785 | 4.898 | 2.199 | 5.411 | 5.154 | 0.739 | 0.606 |
| 3.318 | 3.510 | 2.331 | 3.703 | 3.762 | 0.504 | 0.606 |
| 8.885 | 8.291 | 9.532 | 7.683 | 7.779 | 0.467 | 0.606 |
| 2.738 | 2.469 | 3.743 | 1.815 | 2.123 | 0.422 | 0.606 |
| 7.616 | 8.176 | 7.408 | 7.984 | 7.884 | 0.337 | 0.606 |
| 5.173 | 5.282 | 5.211 | 5.771 | 5.764 | 0.357 | 0.606 |
| 6.543 | 6.832 | 7.007 | 6.518 | 6.629 | 0.315 | 0.606 |
| 6.172 | 5.503 | 5.258 | 4.355 | 5.087 | 0.417 | 0.606 |
| 6.138 | 6.677 | 6.441 | 6.666 | 7.194 | 0.415 | 0.606 |
| 4.578 | 3.961 | 5.246 | 4.961 | 4.781 | 0.460 | 0.606 |
| 4.301 | 4.372 | 4.357 | 4.793 | 4.780 | 0.378 | 0.606 |
| 6.267 | 7.852 | 7.240 | 6.199 | 5.689 | 0.743 | 0.606 |
| 4.093 | 3.893 | 4.384 | 3.491 | 3.658 | 0.389 | 0.606 |
| 5.564 | 5.717 | 6.408 | 4.694 | 4.570 | 0.593 | 0.606 |
| 3.729 | 4.482 | 3.501 | 5.580 | 5.712 | 0.646 | 0.606 |
| 5.179 | 5.440 | 4.633 | 5.737 | 5.806 | 0.391 | 0.606 |
| 3.373 | 3.602 | 3.685 | 4.154 | 4.270 | 0.437 | 0.606 |
| 3.466 | 4.472 | 2.492 | 3.121 | 3.195 | 0.502 | 0.606 |
| 3.273 | 3.535 | 3.251 | 2.799 | 4.014 | 0.740 | 0.606 |
| 7.434 | 6.439 | 7.950 | 5.811 | 6.525 | 0.560 | 0.606 |
| 2.408 | 2.405 | 2.328 | 2.468 | 2.883 | 0.466 | 0.606 |
| 2.861 | 3.069 | 2.290 | 3.376 | 3.167 | 0.496 | 0.606 |
| 7.142 | 7.241 | 6.634 | 7.679 | 7.640 | 0.390 | 0.606 |
| 5.791 | 5.554 | 6.832 | 5.142 | 5.255 | 0.484 | 0.606 |
| 4.825 | 4.693 | 5.541 | 4.188 | 4.839 | 0.504 | 0.606 |
| 3.419 | 3.822 | 3.992 | 4.721 | 4.581 | 0.443 | 0.606 |
| 3.622 | 4.637 | 4.709 | 5.137 | 5.174 | 0.450 | 0.606 |
| 3.687 | 4.159 | 3.396 | 4.208 | 4.602 | 0.386 | 0.606 |
| 5.436 | 5.220 | 5.099 | 5.324 | 5.613 | 0.346 | 0.606 |
| 4.408 | 3.688 | 4.313 | 4.249 | 4.837 | 0.518 | 0.606 |

|       |       |       |       |       |       |       |
|-------|-------|-------|-------|-------|-------|-------|
| 5.890 | 4.971 | 6.702 | 5.220 | 5.213 | 0.641 | 0.606 |
| 7.318 | 7.623 | 7.027 | 7.998 | 7.977 | 0.321 | 0.606 |
| 5.108 | 6.089 | 3.289 | 6.471 | 6.640 | 0.657 | 0.606 |
| 5.574 | 6.291 | 6.508 | 4.678 | 5.524 | 0.445 | 0.606 |
| 3.343 | 1.928 | 2.217 | 2.004 | 1.929 | 0.498 | 0.606 |
| 2.926 | 2.070 | 2.683 | 2.673 | 2.548 | 0.364 | 0.606 |
| 6.841 | 6.952 | 6.528 | 7.216 | 7.017 | 0.327 | 0.606 |
| 4.947 | 4.716 | 5.096 | 5.414 | 5.837 | 0.467 | 0.606 |
| 3.411 | 3.433 | 3.802 | 3.967 | 3.565 | 0.480 | 0.606 |
| 4.617 | 4.558 | 5.914 | 4.808 | 4.819 | 0.446 | 0.606 |
| 3.999 | 3.832 | 4.344 | 4.678 | 3.828 | 0.388 | 0.606 |
| 5.266 | 5.848 | 5.825 | 6.186 | 5.893 | 0.350 | 0.606 |
| 6.634 | 6.576 | 6.636 | 6.925 | 6.377 | 0.385 | 0.606 |
| 4.292 | 4.517 | 4.893 | 3.846 | 4.443 | 0.436 | 0.606 |
| 2.584 | 3.173 | 3.953 | 3.307 | 3.213 | 0.525 | 0.606 |
| 4.094 | 4.569 | 4.073 | 5.115 | 4.953 | 0.406 | 0.606 |
| 4.361 | 4.720 | 5.121 | 5.350 | 4.721 | 0.430 | 0.606 |
| 5.163 | 6.213 | 5.241 | 6.806 | 6.687 | 0.496 | 0.606 |
| 2.406 | 2.834 | 2.692 | 3.001 | 3.164 | 0.418 | 0.606 |
| 6.009 | 5.777 | 6.341 | 6.632 | 5.779 | 0.379 | 0.606 |
| 3.475 | 4.302 | 5.712 | 4.343 | 4.724 | 0.548 | 0.606 |
| 3.458 | 3.465 | 3.265 | 3.000 | 4.272 | 0.377 | 0.606 |
| 3.564 | 4.335 | 1.551 | 4.589 | 4.650 | 0.726 | 0.606 |
| 3.845 | 2.254 | 4.425 | 2.336 | 1.489 | 0.775 | 0.606 |
| 2.007 | 2.018 | 1.087 | 3.271 | 2.904 | 0.479 | 0.606 |
| 4.031 | 3.251 | 4.061 | 3.176 | 3.368 | 0.389 | 0.606 |
| 2.970 | 3.637 | 3.602 | 3.275 | 3.264 | 0.441 | 0.606 |
| 4.318 | 3.920 | 3.924 | 4.614 | 4.651 | 0.443 | 0.606 |
| 4.224 | 4.224 | 4.696 | 4.791 | 4.665 | 0.491 | 0.606 |
| 3.188 | 3.958 | 3.852 | 3.816 | 4.173 | 0.391 | 0.606 |
| 5.101 | 5.088 | 5.542 | 5.477 | 5.441 | 0.411 | 0.606 |
| 4.250 | 4.200 | 4.329 | 4.450 | 5.087 | 0.489 | 0.606 |
| 3.878 | 3.998 | 3.327 | 4.607 | 4.756 | 0.433 | 0.606 |
| 3.339 | 2.993 | 2.745 | 3.997 | 2.977 | 0.558 | 0.606 |
| 2.952 | 3.740 | 3.028 | 3.127 | 3.136 | 0.521 | 0.606 |
| 2.128 | 2.142 | 1.724 | 2.687 | 2.905 | 0.421 | 0.606 |
| 4.289 | 4.089 | 5.139 | 4.234 | 4.251 | 0.427 | 0.606 |
| 2.894 | 3.484 | 2.790 | 3.834 | 3.200 | 0.478 | 0.606 |
| 6.024 | 6.196 | 5.811 | 6.577 | 6.517 | 0.384 | 0.606 |
| 7.840 | 8.104 | 7.196 | 8.403 | 8.590 | 0.477 | 0.606 |
| 4.671 | 4.779 | 5.249 | 4.817 | 5.291 | 0.419 | 0.606 |
| 4.022 | 3.944 | 3.927 | 4.355 | 3.950 | 0.458 | 0.606 |
| 4.293 | 4.578 | 3.954 | 4.612 | 4.586 | 0.530 | 0.606 |
| 3.185 | 3.302 | 3.689 | 2.978 | 2.848 | 0.375 | 0.606 |
| 4.657 | 3.889 | 5.029 | 4.169 | 3.900 | 0.381 | 0.606 |
| 5.401 | 5.783 | 4.487 | 6.366 | 6.010 | 0.511 | 0.606 |
| 5.665 | 5.568 | 5.835 | 5.833 | 6.495 | 0.460 | 0.606 |
| 5.588 | 4.892 | 6.109 | 5.236 | 5.365 | 0.468 | 0.606 |
| 2.563 | 2.600 | 3.533 | 2.340 | 2.664 | 0.406 | 0.606 |
| 2.095 | 2.747 | 3.648 | 3.500 | 2.837 | 0.483 | 0.606 |

|       |       |       |       |       |       |       |
|-------|-------|-------|-------|-------|-------|-------|
| 4.187 | 4.529 | 4.240 | 4.704 | 5.047 | 0.589 | 0.606 |
| 2.722 | 2.944 | 3.358 | 2.916 | 2.669 | 0.544 | 0.606 |
| 4.636 | 3.495 | 5.191 | 4.037 | 3.778 | 0.410 | 0.606 |
| 3.495 | 2.269 | 3.129 | 2.440 | 2.651 | 0.413 | 0.606 |
| 5.623 | 6.153 | 6.655 | 6.005 | 6.078 | 0.414 | 0.606 |
| 3.851 | 4.475 | 4.283 | 5.072 | 5.145 | 0.406 | 0.606 |
| 2.057 | 2.025 | 3.006 | 1.762 | 1.384 | 0.454 | 0.606 |
| 4.443 | 3.561 | 5.445 | 3.857 | 4.644 | 0.439 | 0.606 |
| 4.846 | 4.826 | 5.162 | 5.112 | 4.138 | 0.368 | 0.606 |
| 3.458 | 3.436 | 3.194 | 3.420 | 3.778 | 0.495 | 0.606 |
| 6.649 | 6.399 | 7.620 | 6.348 | 6.231 | 0.374 | 0.606 |
| 3.879 | 4.010 | 3.818 | 4.144 | 4.050 | 0.370 | 0.606 |
| 2.723 | 3.783 | 2.481 | 3.679 | 4.334 | 0.536 | 0.606 |
| 4.150 | 4.024 | 4.565 | 3.764 | 3.810 | 0.403 | 0.606 |
| 2.402 | 1.595 | 2.174 | 2.605 | 3.186 | 0.478 | 0.606 |
| 3.872 | 3.900 | 4.057 | 3.941 | 4.442 | 0.409 | 0.606 |
| 1.982 | 3.312 | 3.051 | 3.235 | 2.967 | 0.426 | 0.606 |
| 2.917 | 3.607 | 3.280 | 3.231 | 3.462 | 0.348 | 0.606 |
| 5.847 | 6.034 | 5.495 | 6.338 | 6.349 | 0.363 | 0.606 |
| 4.269 | 4.546 | 3.898 | 4.868 | 4.877 | 0.378 | 0.606 |
| 4.469 | 4.030 | 4.559 | 4.267 | 4.247 | 0.402 | 0.606 |
| 6.748 | 6.207 | 5.306 | 6.007 | 6.016 | 0.366 | 0.606 |
| 3.609 | 5.385 | 1.329 | 5.987 | 5.509 | 0.900 | 0.606 |
| 2.640 | 2.239 | 1.203 | 3.172 | 3.101 | 0.473 | 0.606 |
| 3.390 | 3.887 | 2.562 | 4.979 | 4.422 | 0.487 | 0.606 |
| 3.565 | 4.446 | 4.245 | 4.224 | 4.153 | 0.441 | 0.606 |
| 5.330 | 4.655 | 6.051 | 5.060 | 4.786 | 0.439 | 0.606 |
| 3.501 | 3.337 | 2.985 | 4.276 | 3.085 | 0.461 | 0.606 |
| 5.118 | 4.764 | 5.964 | 5.297 | 5.166 | 0.394 | 0.606 |
| 4.038 | 4.317 | 5.376 | 4.294 | 4.893 | 0.373 | 0.606 |
| 2.980 | 3.448 | 3.504 | 3.677 | 4.160 | 0.410 | 0.606 |
| 5.075 | 5.782 | 5.973 | 5.794 | 5.964 | 0.327 | 0.606 |
| 5.227 | 6.375 | 6.149 | 6.575 | 6.343 | 0.453 | 0.606 |
| 4.713 | 4.936 | 5.135 | 4.476 | 5.102 | 0.535 | 0.606 |
| 3.869 | 5.682 | 5.136 | 5.668 | 5.518 | 0.472 | 0.606 |
| 5.216 | 5.214 | 4.654 | 5.396 | 5.615 | 0.452 | 0.606 |
| 4.181 | 4.268 | 4.084 | 4.376 | 4.569 | 0.435 | 0.606 |
| 2.103 | 1.868 | 2.965 | 3.583 | 2.480 | 0.571 | 0.606 |
| 4.480 | 4.349 | 4.353 | 4.719 | 5.080 | 0.562 | 0.606 |
| 6.111 | 6.211 | 6.273 | 7.055 | 6.676 | 0.403 | 0.606 |
| 4.411 | 5.389 | 5.395 | 5.297 | 5.809 | 0.406 | 0.606 |
| 3.207 | 3.649 | 3.286 | 4.041 | 4.287 | 0.366 | 0.606 |
| 6.986 | 5.712 | 6.892 | 5.726 | 5.934 | 0.428 | 0.606 |
| 5.310 | 5.847 | 4.512 | 5.795 | 6.156 | 0.484 | 0.606 |
| 2.176 | 2.416 | 2.362 | 2.514 | 3.217 | 0.424 | 0.606 |
| 4.638 | 4.259 | 5.750 | 4.164 | 5.844 | 0.534 | 0.606 |
| 6.004 | 6.437 | 5.753 | 6.699 | 6.783 | 0.427 | 0.606 |
| 2.752 | 3.564 | 3.635 | 3.597 | 4.465 | 0.556 | 0.606 |
| 4.061 | 4.268 | 3.444 | 5.094 | 5.068 | 0.515 | 0.606 |
| 4.899 | 4.156 | 5.403 | 3.417 | 2.690 | 0.577 | 0.606 |

|       |       |       |       |       |       |       |
|-------|-------|-------|-------|-------|-------|-------|
| 3.565 | 3.150 | 4.342 | 3.307 | 3.939 | 0.545 | 0.606 |
| 3.196 | 3.495 | 2.307 | 3.421 | 3.438 | 0.395 | 0.606 |
| 5.268 | 5.479 | 5.286 | 5.896 | 5.718 | 0.295 | 0.606 |
| 6.504 | 6.736 | 6.824 | 6.586 | 6.883 | 0.343 | 0.606 |
| 5.458 | 4.737 | 6.148 | 4.814 | 4.916 | 0.493 | 0.606 |
| 4.988 | 5.359 | 5.412 | 5.544 | 5.372 | 0.387 | 0.606 |
| 3.602 | 4.886 | 3.818 | 5.567 | 5.143 | 0.492 | 0.606 |
| 6.344 | 4.932 | 6.086 | 5.434 | 5.220 | 0.399 | 0.606 |
| 3.171 | 3.065 | 2.691 | 2.647 | 3.496 | 0.432 | 0.606 |
| 1.730 | 2.144 | 3.308 | 2.542 | 2.940 | 0.466 | 0.606 |
| 7.155 | 6.133 | 8.075 | 5.491 | 5.719 | 0.637 | 0.606 |
| 3.697 | 4.345 | 3.874 | 4.603 | 4.647 | 0.335 | 0.606 |
| 5.421 | 4.754 | 4.632 | 5.339 | 5.378 | 0.400 | 0.606 |
| 3.495 | 3.834 | 4.385 | 4.634 | 3.843 | 0.515 | 0.606 |
| 4.067 | 4.350 | 3.546 | 3.868 | 4.521 | 0.428 | 0.606 |
| 4.998 | 4.235 | 4.659 | 4.066 | 5.002 | 0.487 | 0.606 |
| 4.201 | 3.987 | 4.992 | 4.666 | 4.312 | 0.398 | 0.606 |
| 2.229 | 3.418 | 2.623 | 2.713 | 1.217 | 0.644 | 0.606 |
| 3.806 | 4.433 | 3.605 | 4.948 | 4.411 | 0.417 | 0.606 |
| 4.642 | 4.192 | 4.627 | 4.146 | 4.503 | 0.424 | 0.606 |
| 3.933 | 3.360 | 3.704 | 2.823 | 4.016 | 0.499 | 0.606 |
| 3.791 | 2.503 | 3.665 | 2.040 | 2.018 | 0.513 | 0.606 |
| 3.622 | 4.477 | 4.356 | 4.067 | 4.420 | 0.537 | 0.606 |
| 4.130 | 3.679 | 4.614 | 3.460 | 3.872 | 0.406 | 0.606 |
| 3.279 | 3.596 | 3.773 | 3.844 | 3.522 | 0.345 | 0.606 |
| 4.327 | 4.329 | 3.949 | 4.604 | 4.684 | 0.454 | 0.606 |
| 3.584 | 3.841 | 4.199 | 4.377 | 4.364 | 0.432 | 0.606 |
| 4.992 | 4.723 | 6.015 | 5.339 | 5.292 | 0.445 | 0.606 |
| 2.927 | 2.119 | 2.322 | 2.137 | 2.804 | 0.424 | 0.606 |
| 4.983 | 6.021 | 5.592 | 6.003 | 6.077 | 0.368 | 0.606 |
| 5.234 | 5.132 | 5.740 | 5.705 | 5.426 | 0.375 | 0.606 |
| 4.038 | 4.623 | 4.586 | 4.119 | 4.125 | 0.385 | 0.606 |
| 4.007 | 3.212 | 3.822 | 4.227 | 3.968 | 0.501 | 0.606 |
| 3.998 | 4.620 | 4.817 | 4.659 | 4.926 | 0.401 | 0.606 |
| 2.532 | 3.312 | 2.976 | 2.857 | 3.221 | 0.478 | 0.606 |
| 3.588 | 3.681 | 4.285 | 3.745 | 4.026 | 0.412 | 0.606 |
| 3.746 | 4.016 | 4.417 | 4.406 | 3.891 | 0.384 | 0.606 |
| 5.373 | 3.942 | 5.506 | 3.558 | 4.142 | 0.637 | 0.606 |
| 4.380 | 4.361 | 5.917 | 4.438 | 4.634 | 0.435 | 0.606 |
| 7.093 | 7.073 | 8.634 | 6.544 | 6.316 | 0.479 | 0.606 |
| 5.078 | 5.205 | 5.301 | 5.451 | 5.750 | 0.440 | 0.606 |
| 4.693 | 4.973 | 4.942 | 5.363 | 5.158 | 0.348 | 0.606 |
| 7.279 | 7.426 | 8.094 | 8.454 | 7.939 | 0.357 | 0.606 |
| 3.794 | 3.164 | 4.964 | 4.044 | 4.223 | 0.443 | 0.606 |
| 3.235 | 3.540 | 4.276 | 4.293 | 3.550 | 0.427 | 0.606 |
| 3.003 | 2.342 | 2.981 | 2.464 | 2.822 | 0.443 | 0.606 |
| 4.208 | 3.766 | 4.028 | 4.567 | 4.722 | 0.445 | 0.606 |
| 3.319 | 3.109 | 3.084 | 3.767 | 3.453 | 0.429 | 0.606 |
| 3.740 | 2.613 | 3.298 | 2.534 | 2.518 | 0.421 | 0.606 |
| 3.772 | 2.963 | 3.786 | 2.476 | 3.219 | 0.450 | 0.606 |

|       |       |       |       |       |       |       |
|-------|-------|-------|-------|-------|-------|-------|
| 3.200 | 3.923 | 2.684 | 4.052 | 4.304 | 0.416 | 0.606 |
| 3.809 | 4.004 | 3.945 | 4.162 | 4.301 | 0.433 | 0.606 |
| 2.849 | 2.944 | 2.574 | 4.670 | 4.214 | 0.599 | 0.606 |
| 4.449 | 4.881 | 6.497 | 3.965 | 4.419 | 0.668 | 0.606 |
| 3.383 | 2.992 | 3.373 | 3.033 | 2.988 | 0.349 | 0.606 |
| 4.971 | 5.530 | 4.789 | 5.867 | 5.795 | 0.419 | 0.606 |
| 2.107 | 1.785 | 3.136 | 1.940 | 2.961 | 0.641 | 0.606 |
| 4.327 | 4.138 | 4.684 | 4.193 | 4.143 | 0.395 | 0.606 |
| 4.889 | 4.519 | 4.239 | 4.637 | 4.787 | 0.423 | 0.606 |
| 2.452 | 2.345 | 1.850 | 2.619 | 2.849 | 0.568 | 0.606 |
| 4.812 | 4.682 | 5.217 | 4.088 | 5.149 | 0.421 | 0.606 |
| 4.112 | 3.729 | 3.102 | 1.718 | 3.626 | 0.664 | 0.606 |
| 3.383 | 3.544 | 3.655 | 4.310 | 3.940 | 0.399 | 0.606 |
| 3.465 | 4.039 | 3.500 | 3.600 | 4.094 | 0.390 | 0.606 |
| 3.573 | 3.679 | 4.338 | 4.331 | 3.827 | 0.471 | 0.606 |
| 6.195 | 6.823 | 6.375 | 7.250 | 7.220 | 0.392 | 0.606 |
| 2.817 | 3.102 | 2.974 | 3.566 | 3.230 | 0.395 | 0.606 |
| 4.159 | 4.619 | 4.215 | 5.044 | 4.523 | 0.403 | 0.606 |
| 5.185 | 5.562 | 5.287 | 6.091 | 6.196 | 0.355 | 0.606 |
| 4.063 | 4.160 | 4.028 | 4.315 | 4.673 | 0.489 | 0.606 |
| 6.008 | 5.850 | 5.969 | 6.279 | 6.287 | 0.359 | 0.606 |
| 4.429 | 4.286 | 4.518 | 4.347 | 4.683 | 0.356 | 0.606 |
| 6.211 | 5.666 | 6.399 | 4.724 | 4.706 | 0.455 | 0.606 |
| 4.541 | 5.073 | 4.933 | 6.033 | 5.988 | 0.513 | 0.606 |
| 4.662 | 3.670 | 4.205 | 4.602 | 4.640 | 0.517 | 0.606 |
| 3.442 | 3.171 | 3.975 | 3.806 | 3.380 | 0.407 | 0.606 |
| 3.061 | 3.499 | 2.719 | 3.290 | 2.746 | 0.501 | 0.606 |
| 6.308 | 6.562 | 6.857 | 6.630 | 6.938 | 0.341 | 0.606 |
| 4.888 | 4.675 | 2.185 | 5.379 | 5.418 | 0.770 | 0.606 |
| 4.334 | 4.746 | 2.395 | 4.759 | 6.018 | 0.679 | 0.606 |
| 3.349 | 2.718 | 3.541 | 3.499 | 2.296 | 0.606 | 0.606 |
| 4.383 | 3.691 | 3.844 | 4.029 | 4.484 | 0.405 | 0.606 |
| 3.868 | 3.995 | 3.194 | 3.874 | 3.549 | 0.392 | 0.606 |
| 4.762 | 4.976 | 4.045 | 5.553 | 5.389 | 0.422 | 0.606 |
| 4.167 | 3.727 | 4.498 | 3.526 | 4.375 | 0.569 | 0.606 |
| 2.085 | 2.126 | 2.395 | 2.248 | 2.650 | 0.423 | 0.606 |
| 5.866 | 4.942 | 6.401 | 4.933 | 5.234 | 0.413 | 0.606 |
| 2.107 | 3.943 | 2.108 | 4.345 | 3.910 | 0.580 | 0.606 |
| 4.198 | 4.256 | 3.888 | 4.476 | 4.569 | 0.341 | 0.606 |
| 5.182 | 5.258 | 5.022 | 5.497 | 5.523 | 0.519 | 0.606 |
| 1.949 | 2.342 | 2.283 | 2.675 | 2.416 | 0.452 | 0.606 |
| 4.780 | 4.867 | 6.333 | 4.620 | 5.182 | 0.502 | 0.606 |
| 3.961 | 3.904 | 3.683 | 4.333 | 3.476 | 0.428 | 0.606 |
| 3.042 | 3.394 | 3.330 | 3.828 | 3.825 | 0.402 | 0.606 |
| 5.174 | 5.922 | 4.569 | 6.403 | 6.445 | 0.464 | 0.606 |
| 3.657 | 3.360 | 2.199 | 3.180 | 3.997 | 0.521 | 0.606 |
| 4.395 | 4.024 | 4.051 | 3.330 | 4.391 | 0.446 | 0.606 |
| 4.822 | 4.012 | 4.101 | 3.997 | 4.438 | 0.401 | 0.606 |
| 3.749 | 3.381 | 3.198 | 3.373 | 3.903 | 0.463 | 0.606 |
| 3.554 | 3.994 | 3.856 | 4.268 | 3.891 | 0.361 | 0.606 |

|       |       |       |       |       |       |       |
|-------|-------|-------|-------|-------|-------|-------|
| 3.289 | 3.252 | 3.173 | 3.145 | 3.793 | 0.395 | 0.606 |
| 4.509 | 3.359 | 4.758 | 2.990 | 3.295 | 0.541 | 0.606 |
| 2.605 | 2.542 | 4.189 | 3.324 | 3.182 | 0.481 | 0.606 |
| 3.204 | 4.221 | 3.953 | 3.662 | 3.789 | 0.435 | 0.606 |
| 3.763 | 4.005 | 4.351 | 4.039 | 4.133 | 0.443 | 0.606 |
| 3.948 | 3.551 | 5.407 | 3.886 | 3.693 | 0.481 | 0.606 |
| 3.682 | 4.237 | 4.224 | 4.490 | 4.712 | 0.361 | 0.606 |
| 4.199 | 3.739 | 4.578 | 3.531 | 3.777 | 0.378 | 0.606 |
| 4.313 | 4.608 | 4.688 | 4.831 | 4.722 | 0.370 | 0.606 |
| 3.176 | 3.474 | 2.536 | 4.418 | 4.969 | 0.601 | 0.606 |
| 3.988 | 4.092 | 4.246 | 4.103 | 4.415 | 0.439 | 0.606 |
| 6.556 | 6.411 | 5.844 | 6.758 | 6.858 | 0.415 | 0.606 |
| 8.248 | 8.657 | 7.595 | 8.947 | 8.782 | 0.383 | 0.606 |



| <b>t.ord</b> | <b>p.ord</b> | <b>df.res</b> | <b>s.res</b> | <b>s.prior</b> | <b>df.prior</b> |
|--------------|--------------|---------------|--------------|----------------|-----------------|
| 0.170        | 0.867        | 19.000        | 0.515        | 0.476          | 6.112           |
| -0.322       | 0.751        | 19.000        | 0.511        | 0.476          | 6.112           |
| -1.581       | 0.130        | 19.000        | 0.452        | 0.476          | 6.112           |
| -0.938       | 0.360        | 19.000        | 0.454        | 0.476          | 6.112           |
| 1.882        | 0.075        | 19.000        | 0.437        | 0.476          | 6.112           |
| 1.482        | 0.155        | 19.000        | 0.400        | 0.476          | 6.112           |
| 2.375        | 0.028        | 19.000        | 0.310        | 0.476          | 6.112           |
| 2.571        | 0.019        | 19.000        | 0.380        | 0.476          | 6.112           |
| 1.964        | 0.064        | 19.000        | 0.329        | 0.476          | 6.112           |
| -1.942       | 0.067        | 19.000        | 0.462        | 0.476          | 6.112           |
| -1.709       | 0.104        | 19.000        | 0.434        | 0.476          | 6.112           |
| -2.627       | 0.017        | 19.000        | 0.650        | 0.476          | 6.112           |
| 1.986        | 0.062        | 19.000        | 0.438        | 0.476          | 6.112           |
| 0.535        | 0.599        | 19.000        | 0.502        | 0.476          | 6.112           |
| -2.679       | 0.015        | 19.000        | 0.569        | 0.476          | 6.112           |
| 1.047        | 0.308        | 19.000        | 0.378        | 0.476          | 6.112           |
| -2.274       | 0.035        | 19.000        | 1.215        | 0.476          | 6.112           |
| -3.144       | 0.005        | 19.000        | 0.815        | 0.476          | 6.112           |
| -0.948       | 0.355        | 19.000        | 0.649        | 0.476          | 6.112           |
| -1.089       | 0.290        | 19.000        | 0.304        | 0.476          | 6.112           |
| 0.476        | 0.640        | 19.000        | 0.378        | 0.476          | 6.112           |
| -0.816       | 0.425        | 19.000        | 0.954        | 0.476          | 6.112           |
| -1.601       | 0.126        | 19.000        | 0.468        | 0.476          | 6.112           |
| 1.008        | 0.326        | 19.000        | 0.317        | 0.476          | 6.112           |
| 0.825        | 0.420        | 19.000        | 0.463        | 0.476          | 6.112           |
| 1.613        | 0.123        | 19.000        | 0.574        | 0.476          | 6.112           |
| 2.305        | 0.033        | 19.000        | 0.747        | 0.476          | 6.112           |
| -1.314       | 0.204        | 19.000        | 0.340        | 0.476          | 6.112           |
| -0.469       | 0.644        | 19.000        | 0.359        | 0.476          | 6.112           |
| -0.853       | 0.404        | 19.000        | 0.575        | 0.476          | 6.112           |
| 2.142        | 0.045        | 19.000        | 0.657        | 0.476          | 6.112           |
| 3.061        | 0.006        | 19.000        | 0.529        | 0.476          | 6.112           |
| 2.477        | 0.023        | 19.000        | 0.250        | 0.476          | 6.112           |
| -3.104       | 0.006        | 19.000        | 0.463        | 0.476          | 6.112           |
| 0.927        | 0.365        | 19.000        | 0.305        | 0.476          | 6.112           |
| 1.380        | 0.184        | 19.000        | 0.408        | 0.476          | 6.112           |
| -1.046       | 0.309        | 19.000        | 0.475        | 0.476          | 6.112           |
| -2.043       | 0.055        | 19.000        | 0.450        | 0.476          | 6.112           |
| -1.171       | 0.256        | 19.000        | 0.528        | 0.476          | 6.112           |
| -1.856       | 0.079        | 19.000        | 0.441        | 0.476          | 6.112           |
| 1.934        | 0.068        | 19.000        | 0.638        | 0.476          | 6.112           |
| -1.439       | 0.167        | 19.000        | 0.611        | 0.476          | 6.112           |
| -1.702       | 0.105        | 19.000        | 0.718        | 0.476          | 6.112           |
| -3.372       | 0.003        | 19.000        | 0.276        | 0.476          | 6.112           |
| 1.870        | 0.077        | 19.000        | 0.679        | 0.476          | 6.112           |
| -0.428       | 0.673        | 19.000        | 0.409        | 0.476          | 6.112           |
| 1.952        | 0.066        | 19.000        | 0.497        | 0.476          | 6.112           |
| 0.186        | 0.854        | 19.000        | 0.354        | 0.476          | 6.112           |
| 1.836        | 0.082        | 19.000        | 0.363        | 0.476          | 6.112           |

|        |       |        |       |       |       |
|--------|-------|--------|-------|-------|-------|
| -2.052 | 0.054 | 19.000 | 0.705 | 0.476 | 6.112 |
| -1.779 | 0.091 | 19.000 | 0.470 | 0.476 | 6.112 |
| -1.512 | 0.147 | 19.000 | 0.480 | 0.476 | 6.112 |
| 0.017  | 0.986 | 19.000 | 0.414 | 0.476 | 6.112 |
| 0.476  | 0.639 | 19.000 | 0.525 | 0.476 | 6.112 |
| 0.448  | 0.659 | 19.000 | 0.557 | 0.476 | 6.112 |
| -1.924 | 0.069 | 19.000 | 0.402 | 0.476 | 6.112 |
| -1.271 | 0.219 | 19.000 | 0.556 | 0.476 | 6.112 |
| -0.305 | 0.764 | 19.000 | 0.606 | 0.476 | 6.112 |
| -0.664 | 0.515 | 19.000 | 0.901 | 0.476 | 6.112 |
| 1.007  | 0.327 | 19.000 | 0.468 | 0.476 | 6.112 |
| 1.961  | 0.065 | 19.000 | 0.432 | 0.476 | 6.112 |
| -1.635 | 0.118 | 19.000 | 0.406 | 0.476 | 6.112 |
| -1.082 | 0.293 | 19.000 | 0.417 | 0.476 | 6.112 |
| -1.384 | 0.182 | 19.000 | 0.595 | 0.476 | 6.112 |
| 2.836  | 0.011 | 19.000 | 0.468 | 0.476 | 6.112 |
| -0.265 | 0.794 | 19.000 | 0.515 | 0.476 | 6.112 |
| -0.135 | 0.894 | 19.000 | 0.443 | 0.476 | 6.112 |
| 1.560  | 0.135 | 19.000 | 0.614 | 0.476 | 6.112 |
| -1.212 | 0.241 | 19.000 | 0.467 | 0.476 | 6.112 |
| -3.068 | 0.006 | 19.000 | 0.484 | 0.476 | 6.112 |
| 0.198  | 0.845 | 19.000 | 0.455 | 0.476 | 6.112 |
| -0.902 | 0.378 | 19.000 | 0.442 | 0.476 | 6.112 |
| -1.757 | 0.095 | 19.000 | 1.325 | 0.476 | 6.112 |
| 1.412  | 0.174 | 19.000 | 0.460 | 0.476 | 6.112 |
| -0.952 | 0.353 | 19.000 | 0.372 | 0.476 | 6.112 |
| 0.961  | 0.348 | 19.000 | 0.408 | 0.476 | 6.112 |
| 0.802  | 0.433 | 19.000 | 0.530 | 0.476 | 6.112 |
| 1.034  | 0.314 | 19.000 | 0.358 | 0.476 | 6.112 |
| 2.508  | 0.021 | 19.000 | 0.443 | 0.476 | 6.112 |
| -1.301 | 0.209 | 19.000 | 0.875 | 0.476 | 6.112 |
| 1.844  | 0.081 | 19.000 | 0.626 | 0.476 | 6.112 |
| 1.349  | 0.193 | 19.000 | 0.428 | 0.476 | 6.112 |
| -1.347 | 0.194 | 19.000 | 0.461 | 0.476 | 6.112 |
| 0.935  | 0.361 | 19.000 | 0.480 | 0.476 | 6.112 |
| -1.717 | 0.102 | 19.000 | 0.780 | 0.476 | 6.112 |
| -1.365 | 0.188 | 19.000 | 0.554 | 0.476 | 6.112 |
| 1.062  | 0.302 | 19.000 | 0.427 | 0.476 | 6.112 |
| 2.220  | 0.039 | 19.000 | 0.450 | 0.476 | 6.112 |
| 1.252  | 0.226 | 19.000 | 0.413 | 0.476 | 6.112 |
| 0.071  | 0.944 | 19.000 | 0.505 | 0.476 | 6.112 |
| -2.723 | 0.013 | 19.000 | 0.449 | 0.476 | 6.112 |
| -2.497 | 0.022 | 19.000 | 0.965 | 0.476 | 6.112 |
| 2.605  | 0.017 | 19.000 | 0.387 | 0.476 | 6.112 |
| -1.769 | 0.093 | 19.000 | 0.560 | 0.476 | 6.112 |
| 0.768  | 0.452 | 19.000 | 1.066 | 0.476 | 6.112 |
| 1.648  | 0.116 | 19.000 | 0.412 | 0.476 | 6.112 |
| 2.400  | 0.027 | 19.000 | 0.647 | 0.476 | 6.112 |
| 1.522  | 0.144 | 19.000 | 0.476 | 0.476 | 6.112 |
| 2.618  | 0.017 | 19.000 | 0.933 | 0.476 | 6.112 |

|        |       |        |       |       |       |
|--------|-------|--------|-------|-------|-------|
| 0.297  | 0.769 | 19.000 | 0.422 | 0.476 | 6.112 |
| -0.020 | 0.984 | 19.000 | 0.438 | 0.476 | 6.112 |
| -1.747 | 0.097 | 19.000 | 0.390 | 0.476 | 6.112 |
| -0.490 | 0.630 | 19.000 | 0.495 | 0.476 | 6.112 |
| 1.495  | 0.151 | 19.000 | 0.516 | 0.476 | 6.112 |
| -0.833 | 0.415 | 19.000 | 0.508 | 0.476 | 6.112 |
| 3.206  | 0.005 | 19.000 | 0.473 | 0.476 | 6.112 |
| -1.462 | 0.160 | 19.000 | 0.404 | 0.476 | 6.112 |
| 1.576  | 0.132 | 19.000 | 0.360 | 0.476 | 6.112 |
| 2.846  | 0.010 | 19.000 | 0.536 | 0.476 | 6.112 |
| 0.166  | 0.870 | 19.000 | 0.362 | 0.476 | 6.112 |
| 0.257  | 0.800 | 19.000 | 0.366 | 0.476 | 6.112 |
| 3.941  | 0.001 | 19.000 | 0.474 | 0.476 | 6.112 |
| 0.716  | 0.483 | 19.000 | 0.563 | 0.476 | 6.112 |
| -0.910 | 0.374 | 19.000 | 0.553 | 0.476 | 6.112 |
| -1.289 | 0.213 | 19.000 | 0.618 | 0.476 | 6.112 |
| -2.038 | 0.056 | 19.000 | 0.419 | 0.476 | 6.112 |
| 0.416  | 0.682 | 19.000 | 0.491 | 0.476 | 6.112 |
| 0.878  | 0.391 | 19.000 | 0.398 | 0.476 | 6.112 |
| 3.671  | 0.002 | 19.000 | 0.837 | 0.476 | 6.112 |
| -0.935 | 0.361 | 19.000 | 0.479 | 0.476 | 6.112 |
| -0.376 | 0.711 | 19.000 | 0.276 | 0.476 | 6.112 |
| -1.787 | 0.090 | 19.000 | 0.518 | 0.476 | 6.112 |
| -2.263 | 0.036 | 19.000 | 0.375 | 0.476 | 6.112 |
| 1.576  | 0.131 | 19.000 | 0.586 | 0.476 | 6.112 |
| -1.821 | 0.084 | 19.000 | 0.395 | 0.476 | 6.112 |
| 0.993  | 0.333 | 19.000 | 0.488 | 0.476 | 6.112 |
| -0.763 | 0.455 | 19.000 | 0.982 | 0.476 | 6.112 |
| -0.545 | 0.592 | 19.000 | 0.446 | 0.476 | 6.112 |
| 3.215  | 0.005 | 19.000 | 0.592 | 0.476 | 6.112 |
| 0.452  | 0.657 | 19.000 | 0.512 | 0.476 | 6.112 |
| -0.166 | 0.870 | 19.000 | 0.512 | 0.476 | 6.112 |
| 0.666  | 0.514 | 19.000 | 0.578 | 0.476 | 6.112 |
| 0.859  | 0.401 | 19.000 | 0.540 | 0.476 | 6.112 |
| -1.340 | 0.196 | 19.000 | 0.721 | 0.476 | 6.112 |
| -1.691 | 0.107 | 19.000 | 0.461 | 0.476 | 6.112 |
| -1.765 | 0.094 | 19.000 | 1.131 | 0.476 | 6.112 |
| 0.387  | 0.703 | 19.000 | 0.649 | 0.476 | 6.112 |
| -0.110 | 0.913 | 19.000 | 0.565 | 0.476 | 6.112 |
| -1.532 | 0.142 | 19.000 | 0.362 | 0.476 | 6.112 |
| 0.091  | 0.928 | 19.000 | 0.460 | 0.476 | 6.112 |
| 2.298  | 0.033 | 19.000 | 0.538 | 0.476 | 6.112 |
| 0.682  | 0.504 | 19.000 | 0.493 | 0.476 | 6.112 |
| -0.225 | 0.825 | 19.000 | 0.464 | 0.476 | 6.112 |
| -2.091 | 0.050 | 19.000 | 0.325 | 0.476 | 6.112 |
| 0.753  | 0.461 | 19.000 | 0.426 | 0.476 | 6.112 |
| -0.900 | 0.379 | 19.000 | 0.606 | 0.476 | 6.112 |
| 1.634  | 0.119 | 19.000 | 0.664 | 0.476 | 6.112 |
| 0.028  | 0.978 | 19.000 | 0.468 | 0.476 | 6.112 |
| 0.390  | 0.701 | 19.000 | 0.461 | 0.476 | 6.112 |

|        |       |        |       |       |       |
|--------|-------|--------|-------|-------|-------|
| 0.513  | 0.614 | 19.000 | 0.423 | 0.476 | 6.112 |
| -2.211 | 0.040 | 19.000 | 0.389 | 0.476 | 6.112 |
| -0.232 | 0.819 | 19.000 | 0.420 | 0.476 | 6.112 |
| -0.465 | 0.647 | 19.000 | 0.828 | 0.476 | 6.112 |
| -0.776 | 0.447 | 19.000 | 0.457 | 0.476 | 6.112 |
| -0.782 | 0.444 | 19.000 | 0.292 | 0.476 | 6.112 |
| -1.646 | 0.116 | 19.000 | 0.676 | 0.476 | 6.112 |
| 1.670  | 0.111 | 19.000 | 0.292 | 0.476 | 6.112 |
| 0.324  | 0.749 | 19.000 | 0.416 | 0.476 | 6.112 |
| 2.197  | 0.041 | 19.000 | 0.408 | 0.476 | 6.112 |
| 2.171  | 0.043 | 19.000 | 0.508 | 0.476 | 6.112 |
| 0.018  | 0.985 | 19.000 | 0.454 | 0.476 | 6.112 |
| -0.644 | 0.528 | 19.000 | 0.374 | 0.476 | 6.112 |
| 0.986  | 0.337 | 19.000 | 0.393 | 0.476 | 6.112 |
| 1.125  | 0.275 | 19.000 | 0.483 | 0.476 | 6.112 |
| 0.510  | 0.616 | 19.000 | 0.703 | 0.476 | 6.112 |
| 1.956  | 0.065 | 19.000 | 0.452 | 0.476 | 6.112 |
| -1.913 | 0.071 | 19.000 | 0.400 | 0.476 | 6.112 |
| 2.255  | 0.036 | 19.000 | 0.710 | 0.476 | 6.112 |
| 1.877  | 0.076 | 19.000 | 0.692 | 0.476 | 6.112 |
| -0.582 | 0.567 | 19.000 | 0.574 | 0.476 | 6.112 |
| 1.723  | 0.101 | 19.000 | 0.282 | 0.476 | 6.112 |
| 2.146  | 0.045 | 19.000 | 0.372 | 0.476 | 6.112 |
| 0.888  | 0.386 | 19.000 | 0.601 | 0.476 | 6.112 |
| 1.951  | 0.066 | 19.000 | 0.267 | 0.476 | 6.112 |
| -1.233 | 0.233 | 19.000 | 0.390 | 0.476 | 6.112 |
| 2.566  | 0.019 | 19.000 | 0.427 | 0.476 | 6.112 |
| 1.057  | 0.304 | 19.000 | 0.503 | 0.476 | 6.112 |
| 2.069  | 0.052 | 19.000 | 0.294 | 0.476 | 6.112 |
| 1.247  | 0.228 | 19.000 | 0.402 | 0.476 | 6.112 |
| -2.116 | 0.048 | 19.000 | 0.817 | 0.476 | 6.112 |
| -3.116 | 0.006 | 19.000 | 0.410 | 0.476 | 6.112 |
| 2.937  | 0.008 | 19.000 | 0.664 | 0.476 | 6.112 |
| -0.230 | 0.820 | 19.000 | 0.411 | 0.476 | 6.112 |
| -0.441 | 0.664 | 19.000 | 0.386 | 0.476 | 6.112 |
| 0.338  | 0.739 | 19.000 | 0.318 | 0.476 | 6.112 |
| 1.213  | 0.240 | 19.000 | 0.443 | 0.476 | 6.112 |
| 1.045  | 0.309 | 19.000 | 0.530 | 0.476 | 6.112 |
| 2.089  | 0.050 | 19.000 | 0.389 | 0.476 | 6.112 |
| 1.711  | 0.103 | 19.000 | 0.878 | 0.476 | 6.112 |
| -1.877 | 0.076 | 19.000 | 0.799 | 0.476 | 6.112 |
| 0.054  | 0.958 | 19.000 | 0.517 | 0.476 | 6.112 |
| 0.134  | 0.895 | 19.000 | 0.334 | 0.476 | 6.112 |
| -0.868 | 0.396 | 19.000 | 0.489 | 0.476 | 6.112 |
| -2.299 | 0.033 | 19.000 | 0.682 | 0.476 | 6.112 |
| 0.238  | 0.814 | 19.000 | 0.517 | 0.476 | 6.112 |
| -0.028 | 0.978 | 19.000 | 0.724 | 0.476 | 6.112 |
| 2.183  | 0.042 | 19.000 | 0.522 | 0.476 | 6.112 |
| 0.536  | 0.598 | 19.000 | 0.485 | 0.476 | 6.112 |
| -0.661 | 0.517 | 19.000 | 1.364 | 0.476 | 6.112 |

|        |       |        |       |       |       |
|--------|-------|--------|-------|-------|-------|
| 1.201  | 0.244 | 19.000 | 0.411 | 0.476 | 6.112 |
| 0.679  | 0.505 | 19.000 | 0.569 | 0.476 | 6.112 |
| 2.529  | 0.020 | 19.000 | 0.623 | 0.476 | 6.112 |
| -1.390 | 0.181 | 19.000 | 0.811 | 0.476 | 6.112 |
| -1.012 | 0.324 | 19.000 | 0.350 | 0.476 | 6.112 |
| -0.386 | 0.704 | 19.000 | 0.565 | 0.476 | 6.112 |
| 0.294  | 0.772 | 19.000 | 0.500 | 0.476 | 6.112 |
| 0.601  | 0.555 | 19.000 | 0.623 | 0.476 | 6.112 |
| 0.953  | 0.353 | 19.000 | 0.564 | 0.476 | 6.112 |
| -1.499 | 0.150 | 19.000 | 0.387 | 0.476 | 6.112 |
| -1.429 | 0.169 | 19.000 | 0.551 | 0.476 | 6.112 |
| -0.849 | 0.407 | 19.000 | 0.587 | 0.476 | 6.112 |
| 1.737  | 0.099 | 19.000 | 0.423 | 0.476 | 6.112 |
| -2.298 | 0.033 | 19.000 | 0.575 | 0.476 | 6.112 |
| 1.577  | 0.131 | 19.000 | 0.411 | 0.476 | 6.112 |
| -0.515 | 0.613 | 19.000 | 0.477 | 0.476 | 6.112 |
| 1.342  | 0.195 | 19.000 | 0.378 | 0.476 | 6.112 |
| 2.284  | 0.034 | 19.000 | 0.969 | 0.476 | 6.112 |
| -3.915 | 0.001 | 19.000 | 0.427 | 0.476 | 6.112 |
| -2.052 | 0.054 | 19.000 | 0.457 | 0.476 | 6.112 |
| -1.049 | 0.307 | 19.000 | 0.409 | 0.476 | 6.112 |
| 1.732  | 0.100 | 19.000 | 0.487 | 0.476 | 6.112 |
| 0.724  | 0.478 | 19.000 | 0.739 | 0.476 | 6.112 |
| 0.251  | 0.805 | 19.000 | 0.485 | 0.476 | 6.112 |
| 2.164  | 0.043 | 19.000 | 0.809 | 0.476 | 6.112 |
| -0.881 | 0.389 | 19.000 | 0.487 | 0.476 | 6.112 |
| 0.844  | 0.409 | 19.000 | 0.819 | 0.476 | 6.112 |
| -3.001 | 0.007 | 19.000 | 0.477 | 0.476 | 6.112 |
| 0.116  | 0.909 | 19.000 | 0.343 | 0.476 | 6.112 |
| -0.986 | 0.337 | 19.000 | 0.760 | 0.476 | 6.112 |
| 0.346  | 0.733 | 19.000 | 0.419 | 0.476 | 6.112 |
| 3.467  | 0.003 | 19.000 | 0.483 | 0.476 | 6.112 |
| -2.010 | 0.059 | 19.000 | 0.590 | 0.476 | 6.112 |
| 2.283  | 0.034 | 19.000 | 0.552 | 0.476 | 6.112 |
| 1.992  | 0.061 | 19.000 | 0.602 | 0.476 | 6.112 |
| 0.524  | 0.606 | 19.000 | 0.486 | 0.476 | 6.112 |
| -0.187 | 0.853 | 19.000 | 0.543 | 0.476 | 6.112 |
| -0.002 | 0.998 | 19.000 | 0.561 | 0.476 | 6.112 |
| 2.305  | 0.033 | 19.000 | 0.726 | 0.476 | 6.112 |
| 1.834  | 0.082 | 19.000 | 0.352 | 0.476 | 6.112 |
| 2.545  | 0.020 | 19.000 | 0.569 | 0.476 | 6.112 |
| -2.619 | 0.017 | 19.000 | 0.314 | 0.476 | 6.112 |
| -0.848 | 0.407 | 19.000 | 0.475 | 0.476 | 6.112 |
| -1.072 | 0.297 | 19.000 | 0.394 | 0.476 | 6.112 |
| 1.540  | 0.140 | 19.000 | 0.391 | 0.476 | 6.112 |
| -1.326 | 0.201 | 19.000 | 0.542 | 0.476 | 6.112 |
| -0.787 | 0.441 | 19.000 | 0.537 | 0.476 | 6.112 |
| -0.520 | 0.609 | 19.000 | 0.485 | 0.476 | 6.112 |
| 1.159  | 0.261 | 19.000 | 0.483 | 0.476 | 6.112 |
| 0.923  | 0.368 | 19.000 | 0.930 | 0.476 | 6.112 |

|        |       |        |       |       |       |
|--------|-------|--------|-------|-------|-------|
| 2.314  | 0.032 | 19.000 | 0.381 | 0.476 | 6.112 |
| -2.501 | 0.022 | 19.000 | 0.395 | 0.476 | 6.112 |
| 2.194  | 0.041 | 19.000 | 0.262 | 0.476 | 6.112 |
| -0.640 | 0.530 | 19.000 | 0.494 | 0.476 | 6.112 |
| -2.736 | 0.013 | 19.000 | 0.469 | 0.476 | 6.112 |
| 2.868  | 0.010 | 19.000 | 1.052 | 0.476 | 6.112 |
| 2.833  | 0.011 | 19.000 | 0.393 | 0.476 | 6.112 |
| -0.837 | 0.413 | 19.000 | 0.481 | 0.476 | 6.112 |
| 2.116  | 0.048 | 19.000 | 0.388 | 0.476 | 6.112 |
| 2.773  | 0.012 | 19.000 | 0.640 | 0.476 | 6.112 |
| 1.952  | 0.066 | 19.000 | 0.447 | 0.476 | 6.112 |
| -0.674 | 0.508 | 19.000 | 0.419 | 0.476 | 6.112 |
| 1.739  | 0.098 | 19.000 | 0.199 | 0.476 | 6.112 |
| 2.607  | 0.017 | 19.000 | 0.299 | 0.476 | 6.112 |
| 2.203  | 0.040 | 19.000 | 0.381 | 0.476 | 6.112 |
| 1.921  | 0.070 | 19.000 | 0.388 | 0.476 | 6.112 |
| -2.047 | 0.055 | 19.000 | 0.662 | 0.476 | 6.112 |
| -2.229 | 0.038 | 19.000 | 0.621 | 0.476 | 6.112 |
| -1.924 | 0.069 | 19.000 | 0.670 | 0.476 | 6.112 |
| -1.434 | 0.168 | 19.000 | 0.457 | 0.476 | 6.112 |
| -2.028 | 0.057 | 19.000 | 0.565 | 0.476 | 6.112 |
| -1.442 | 0.166 | 19.000 | 0.417 | 0.476 | 6.112 |
| 1.039  | 0.312 | 19.000 | 0.898 | 0.476 | 6.112 |
| -0.793 | 0.438 | 19.000 | 0.464 | 0.476 | 6.112 |
| -1.683 | 0.109 | 19.000 | 0.397 | 0.476 | 6.112 |
| -0.783 | 0.443 | 19.000 | 0.882 | 0.476 | 6.112 |
| -0.638 | 0.531 | 19.000 | 0.999 | 0.476 | 6.112 |
| -0.598 | 0.557 | 19.000 | 0.974 | 0.476 | 6.112 |
| -1.381 | 0.183 | 19.000 | 0.467 | 0.476 | 6.112 |
| 0.933  | 0.363 | 19.000 | 0.455 | 0.476 | 6.112 |
| 2.032  | 0.056 | 19.000 | 0.449 | 0.476 | 6.112 |
| 4.745  | 0.000 | 19.000 | 0.753 | 0.476 | 6.112 |
| 2.776  | 0.012 | 19.000 | 0.573 | 0.476 | 6.112 |
| 0.727  | 0.476 | 19.000 | 0.528 | 0.476 | 6.112 |
| 1.659  | 0.113 | 19.000 | 0.532 | 0.476 | 6.112 |
| 2.148  | 0.045 | 19.000 | 0.250 | 0.476 | 6.112 |
| 2.142  | 0.045 | 19.000 | 0.693 | 0.476 | 6.112 |
| -2.087 | 0.051 | 19.000 | 0.413 | 0.476 | 6.112 |
| 2.125  | 0.047 | 19.000 | 1.025 | 0.476 | 6.112 |
| -1.739 | 0.098 | 19.000 | 0.410 | 0.476 | 6.112 |
| -0.098 | 0.923 | 19.000 | 0.490 | 0.476 | 6.112 |
| -0.294 | 0.772 | 19.000 | 0.462 | 0.476 | 6.112 |
| 1.239  | 0.230 | 19.000 | 0.418 | 0.476 | 6.112 |
| 2.532  | 0.020 | 19.000 | 0.310 | 0.476 | 6.112 |
| -1.025 | 0.318 | 19.000 | 0.521 | 0.476 | 6.112 |
| 1.165  | 0.258 | 19.000 | 0.608 | 0.476 | 6.112 |
| -2.626 | 0.017 | 19.000 | 0.298 | 0.476 | 6.112 |
| 1.851  | 0.080 | 19.000 | 0.329 | 0.476 | 6.112 |
| -0.615 | 0.546 | 19.000 | 1.142 | 0.476 | 6.112 |
| -2.289 | 0.034 | 19.000 | 0.465 | 0.476 | 6.112 |

|        |       |        |       |       |       |
|--------|-------|--------|-------|-------|-------|
| -1.911 | 0.071 | 19.000 | 0.545 | 0.476 | 6.112 |
| 1.395  | 0.179 | 19.000 | 0.455 | 0.476 | 6.112 |
| -0.857 | 0.402 | 19.000 | 0.482 | 0.476 | 6.112 |
| 0.036  | 0.972 | 19.000 | 0.450 | 0.476 | 6.112 |
| -1.617 | 0.122 | 19.000 | 0.358 | 0.476 | 6.112 |
| 0.135  | 0.894 | 19.000 | 0.486 | 0.476 | 6.112 |
| -0.941 | 0.358 | 19.000 | 0.382 | 0.476 | 6.112 |
| 0.588  | 0.564 | 19.000 | 0.512 | 0.476 | 6.112 |
| -0.039 | 0.969 | 19.000 | 0.646 | 0.476 | 6.112 |
| 0.942  | 0.358 | 19.000 | 0.325 | 0.476 | 6.112 |
| -0.720 | 0.480 | 19.000 | 0.553 | 0.476 | 6.112 |
| 2.178  | 0.042 | 19.000 | 0.588 | 0.476 | 6.112 |
| 2.119  | 0.047 | 19.000 | 0.376 | 0.476 | 6.112 |
| -0.264 | 0.794 | 19.000 | 0.908 | 0.476 | 6.112 |
| -0.676 | 0.507 | 19.000 | 0.756 | 0.476 | 6.112 |
| -0.535 | 0.599 | 19.000 | 0.852 | 0.476 | 6.112 |
| -0.477 | 0.639 | 19.000 | 0.695 | 0.476 | 6.112 |
| 2.646  | 0.016 | 19.000 | 0.465 | 0.476 | 6.112 |
| 2.291  | 0.034 | 19.000 | 0.244 | 0.476 | 6.112 |
| -2.514 | 0.021 | 19.000 | 0.521 | 0.476 | 6.112 |
| -0.221 | 0.828 | 19.000 | 0.450 | 0.476 | 6.112 |
| 0.936  | 0.361 | 19.000 | 0.435 | 0.476 | 6.112 |
| -2.860 | 0.010 | 19.000 | 0.458 | 0.476 | 6.112 |
| 3.983  | 0.001 | 19.000 | 0.430 | 0.476 | 6.112 |
| -0.065 | 0.949 | 19.000 | 0.469 | 0.476 | 6.112 |
| 1.291  | 0.212 | 19.000 | 0.781 | 0.476 | 6.112 |
| 0.469  | 0.644 | 19.000 | 0.440 | 0.476 | 6.112 |
| 1.808  | 0.086 | 19.000 | 0.248 | 0.476 | 6.112 |
| -1.880 | 0.076 | 19.000 | 0.456 | 0.476 | 6.112 |
| 1.706  | 0.104 | 19.000 | 1.075 | 0.476 | 6.112 |
| 0.388  | 0.702 | 19.000 | 0.472 | 0.476 | 6.112 |
| 1.761  | 0.094 | 19.000 | 0.275 | 0.476 | 6.112 |
| 0.815  | 0.425 | 19.000 | 0.514 | 0.476 | 6.112 |
| -0.426 | 0.675 | 19.000 | 0.462 | 0.476 | 6.112 |
| 0.620  | 0.542 | 19.000 | 0.293 | 0.476 | 6.112 |
| -0.503 | 0.621 | 19.000 | 0.590 | 0.476 | 6.112 |
| -1.284 | 0.214 | 19.000 | 0.770 | 0.476 | 6.112 |
| 0.578  | 0.570 | 19.000 | 0.491 | 0.476 | 6.112 |
| -2.827 | 0.011 | 19.000 | 0.587 | 0.476 | 6.112 |
| 0.264  | 0.794 | 19.000 | 0.796 | 0.476 | 6.112 |
| -0.209 | 0.837 | 19.000 | 0.514 | 0.476 | 6.112 |
| 0.553  | 0.587 | 19.000 | 0.863 | 0.476 | 6.112 |
| 1.641  | 0.117 | 19.000 | 0.210 | 0.476 | 6.112 |
| 1.148  | 0.265 | 19.000 | 0.307 | 0.476 | 6.112 |
| -1.734 | 0.099 | 19.000 | 0.459 | 0.476 | 6.112 |
| -1.453 | 0.163 | 19.000 | 0.512 | 0.476 | 6.112 |
| -3.524 | 0.002 | 19.000 | 0.250 | 0.476 | 6.112 |
| 0.791  | 0.439 | 19.000 | 0.426 | 0.476 | 6.112 |
| 3.867  | 0.001 | 19.000 | 0.339 | 0.476 | 6.112 |
| -0.808 | 0.429 | 19.000 | 0.466 | 0.476 | 6.112 |

|        |       |        |       |       |       |
|--------|-------|--------|-------|-------|-------|
| -0.005 | 0.996 | 19.000 | 0.646 | 0.476 | 6.112 |
| -1.684 | 0.108 | 19.000 | 0.421 | 0.476 | 6.112 |
| 2.107  | 0.049 | 19.000 | 0.259 | 0.476 | 6.112 |
| 2.321  | 0.032 | 19.000 | 0.272 | 0.476 | 6.112 |
| 1.505  | 0.149 | 19.000 | 0.697 | 0.476 | 6.112 |
| 3.295  | 0.004 | 19.000 | 0.514 | 0.476 | 6.112 |
| 0.994  | 0.333 | 19.000 | 0.493 | 0.476 | 6.112 |
| 1.784  | 0.090 | 19.000 | 0.511 | 0.476 | 6.112 |
| 1.553  | 0.137 | 19.000 | 0.549 | 0.476 | 6.112 |
| 3.168  | 0.005 | 19.000 | 0.748 | 0.476 | 6.112 |
| 0.452  | 0.656 | 19.000 | 1.248 | 0.476 | 6.112 |
| 0.659  | 0.518 | 19.000 | 0.653 | 0.476 | 6.112 |
| 1.520  | 0.145 | 19.000 | 0.530 | 0.476 | 6.112 |
| 1.302  | 0.209 | 19.000 | 0.312 | 0.476 | 6.112 |
| 0.019  | 0.985 | 19.000 | 0.745 | 0.476 | 6.112 |
| 1.129  | 0.273 | 19.000 | 0.821 | 0.476 | 6.112 |
| 2.087  | 0.051 | 19.000 | 0.875 | 0.476 | 6.112 |
| 2.187  | 0.041 | 19.000 | 0.493 | 0.476 | 6.112 |
| 1.781  | 0.091 | 19.000 | 0.613 | 0.476 | 6.112 |
| 1.685  | 0.108 | 19.000 | 0.545 | 0.476 | 6.112 |
| -1.195 | 0.247 | 19.000 | 0.559 | 0.476 | 6.112 |
| 1.591  | 0.128 | 19.000 | 0.682 | 0.476 | 6.112 |
| 0.025  | 0.980 | 19.000 | 0.483 | 0.476 | 6.112 |
| -0.646 | 0.526 | 19.000 | 0.679 | 0.476 | 6.112 |
| -3.539 | 0.002 | 19.000 | 0.334 | 0.476 | 6.112 |
| 1.457  | 0.161 | 19.000 | 0.550 | 0.476 | 6.112 |
| -2.827 | 0.011 | 19.000 | 0.417 | 0.476 | 6.112 |
| -0.999 | 0.330 | 19.000 | 0.632 | 0.476 | 6.112 |
| 1.316  | 0.204 | 19.000 | 0.368 | 0.476 | 6.112 |
| 0.211  | 0.835 | 19.000 | 0.405 | 0.476 | 6.112 |
| -0.655 | 0.520 | 19.000 | 0.434 | 0.476 | 6.112 |
| 2.442  | 0.025 | 19.000 | 0.484 | 0.476 | 6.112 |
| -1.387 | 0.182 | 19.000 | 0.433 | 0.476 | 6.112 |
| -2.794 | 0.012 | 19.000 | 0.755 | 0.476 | 6.112 |
| 2.407  | 0.026 | 19.000 | 1.050 | 0.476 | 6.112 |
| -0.009 | 0.993 | 19.000 | 0.500 | 0.476 | 6.112 |
| 2.613  | 0.017 | 19.000 | 0.477 | 0.476 | 6.112 |
| 0.761  | 0.456 | 19.000 | 0.399 | 0.476 | 6.112 |
| -3.655 | 0.002 | 19.000 | 0.481 | 0.476 | 6.112 |
| -3.660 | 0.002 | 19.000 | 0.335 | 0.476 | 6.112 |
| 0.159  | 0.875 | 19.000 | 0.660 | 0.476 | 6.112 |
| -1.106 | 0.282 | 19.000 | 0.412 | 0.476 | 6.112 |
| -1.778 | 0.091 | 19.000 | 0.260 | 0.476 | 6.112 |
| 0.902  | 0.378 | 19.000 | 0.563 | 0.476 | 6.112 |
| 1.598  | 0.127 | 19.000 | 0.450 | 0.476 | 6.112 |
| -0.930 | 0.364 | 19.000 | 0.702 | 0.476 | 6.112 |
| 0.605  | 0.553 | 19.000 | 0.443 | 0.476 | 6.112 |
| 2.220  | 0.039 | 19.000 | 0.349 | 0.476 | 6.112 |
| -1.316 | 0.204 | 19.000 | 0.416 | 0.476 | 6.112 |
| 1.188  | 0.249 | 19.000 | 0.534 | 0.476 | 6.112 |



|        |       |        |       |       |       |
|--------|-------|--------|-------|-------|-------|
| -1.036 | 0.313 | 19.000 | 0.416 | 0.476 | 6.112 |
| -2.609 | 0.017 | 19.000 | 0.423 | 0.476 | 6.112 |
| 2.259  | 0.036 | 19.000 | 0.538 | 0.476 | 6.112 |
| -0.771 | 0.450 | 19.000 | 0.432 | 0.476 | 6.112 |
| -0.136 | 0.893 | 19.000 | 0.489 | 0.476 | 6.112 |
| -0.928 | 0.365 | 19.000 | 0.688 | 0.476 | 6.112 |
| 1.052  | 0.306 | 19.000 | 0.346 | 0.476 | 6.112 |
| -1.485 | 0.154 | 19.000 | 0.543 | 0.476 | 6.112 |
| 0.720  | 0.480 | 19.000 | 0.544 | 0.476 | 6.112 |
| -1.300 | 0.209 | 19.000 | 0.717 | 0.476 | 6.112 |
| -0.593 | 0.560 | 19.000 | 0.608 | 0.476 | 6.112 |
| 1.630  | 0.120 | 19.000 | 0.559 | 0.476 | 6.112 |
| -0.657 | 0.519 | 19.000 | 0.481 | 0.476 | 6.112 |
| 0.340  | 0.738 | 19.000 | 0.426 | 0.476 | 6.112 |
| -1.339 | 0.196 | 19.000 | 0.411 | 0.476 | 6.112 |
| -1.132 | 0.272 | 19.000 | 0.827 | 0.476 | 6.112 |
| 1.525  | 0.144 | 19.000 | 0.519 | 0.476 | 6.112 |
| 2.570  | 0.019 | 19.000 | 0.442 | 0.476 | 6.112 |
| -0.331 | 0.744 | 19.000 | 0.535 | 0.476 | 6.112 |
| 2.538  | 0.020 | 19.000 | 0.448 | 0.476 | 6.112 |
| -1.004 | 0.328 | 19.000 | 0.445 | 0.476 | 6.112 |
| 1.813  | 0.086 | 19.000 | 0.430 | 0.476 | 6.112 |
| 1.955  | 0.065 | 19.000 | 0.628 | 0.476 | 6.112 |
| 2.204  | 0.040 | 19.000 | 0.341 | 0.476 | 6.112 |
| 1.235  | 0.232 | 19.000 | 0.296 | 0.476 | 6.112 |
| 1.091  | 0.289 | 19.000 | 0.239 | 0.476 | 6.112 |
| 1.673  | 0.111 | 19.000 | 0.515 | 0.476 | 6.112 |
| -2.208 | 0.040 | 19.000 | 0.742 | 0.476 | 6.112 |
| 0.112  | 0.912 | 19.000 | 0.522 | 0.476 | 6.112 |
| 1.177  | 0.254 | 19.000 | 0.248 | 0.476 | 6.112 |
| -1.512 | 0.147 | 19.000 | 0.538 | 0.476 | 6.112 |
| -1.127 | 0.274 | 19.000 | 0.880 | 0.476 | 6.112 |
| -3.009 | 0.007 | 19.000 | 0.409 | 0.476 | 6.112 |
| -0.235 | 0.817 | 19.000 | 0.808 | 0.476 | 6.112 |
| -0.149 | 0.883 | 19.000 | 0.543 | 0.476 | 6.112 |
| -1.043 | 0.310 | 19.000 | 0.342 | 0.476 | 6.112 |
| -3.307 | 0.004 | 19.000 | 0.363 | 0.476 | 6.112 |
| -0.432 | 0.671 | 19.000 | 0.944 | 0.476 | 6.112 |
| -1.848 | 0.080 | 19.000 | 0.496 | 0.476 | 6.112 |
| -2.641 | 0.016 | 19.000 | 0.374 | 0.476 | 6.112 |
| -0.995 | 0.332 | 19.000 | 0.203 | 0.476 | 6.112 |
| 1.616  | 0.123 | 19.000 | 0.405 | 0.476 | 6.112 |
| 1.249  | 0.227 | 19.000 | 0.522 | 0.476 | 6.112 |
| -0.929 | 0.364 | 19.000 | 0.486 | 0.476 | 6.112 |
| 0.858  | 0.401 | 19.000 | 0.501 | 0.476 | 6.112 |
| 0.738  | 0.470 | 19.000 | 0.265 | 0.476 | 6.112 |
| -2.487 | 0.022 | 19.000 | 0.374 | 0.476 | 6.112 |
| -0.535 | 0.599 | 19.000 | 0.388 | 0.476 | 6.112 |
| -1.242 | 0.229 | 19.000 | 1.203 | 0.476 | 6.112 |
| -0.038 | 0.970 | 19.000 | 0.368 | 0.476 | 6.112 |

|        |       |        |       |       |       |
|--------|-------|--------|-------|-------|-------|
| -0.579 | 0.569 | 19.000 | 0.609 | 0.476 | 6.112 |
| -1.266 | 0.221 | 19.000 | 0.511 | 0.476 | 6.112 |
| 0.205  | 0.840 | 19.000 | 1.055 | 0.476 | 6.112 |
| -2.421 | 0.026 | 19.000 | 0.379 | 0.476 | 6.112 |
| -3.179 | 0.005 | 19.000 | 0.298 | 0.476 | 6.112 |
| -1.213 | 0.240 | 19.000 | 0.380 | 0.476 | 6.112 |
| 1.997  | 0.060 | 19.000 | 0.470 | 0.476 | 6.112 |
| 1.853  | 0.079 | 19.000 | 0.355 | 0.476 | 6.112 |
| 3.306  | 0.004 | 19.000 | 0.240 | 0.476 | 6.112 |
| 1.021  | 0.320 | 19.000 | 0.604 | 0.476 | 6.112 |
| -0.455 | 0.654 | 19.000 | 0.404 | 0.476 | 6.112 |
| -0.256 | 0.800 | 19.000 | 0.511 | 0.476 | 6.112 |
| -2.396 | 0.027 | 19.000 | 0.413 | 0.476 | 6.112 |
| 1.082  | 0.293 | 19.000 | 0.378 | 0.476 | 6.112 |
| 1.827  | 0.083 | 19.000 | 0.740 | 0.476 | 6.112 |
| -2.661 | 0.015 | 19.000 | 0.513 | 0.476 | 6.112 |
| -1.991 | 0.061 | 19.000 | 0.519 | 0.476 | 6.112 |
| -2.490 | 0.022 | 19.000 | 0.505 | 0.476 | 6.112 |
| -0.932 | 0.363 | 19.000 | 0.455 | 0.476 | 6.112 |
| 0.342  | 0.736 | 19.000 | 0.514 | 0.476 | 6.112 |
| 2.970  | 0.008 | 19.000 | 0.290 | 0.476 | 6.112 |
| 0.791  | 0.439 | 19.000 | 0.676 | 0.476 | 6.112 |
| -0.436 | 0.668 | 19.000 | 0.387 | 0.476 | 6.112 |
| 1.029  | 0.316 | 19.000 | 0.509 | 0.476 | 6.112 |
| -0.403 | 0.692 | 19.000 | 0.509 | 0.476 | 6.112 |
| 2.958  | 0.008 | 19.000 | 0.524 | 0.476 | 6.112 |
| 1.185  | 0.251 | 19.000 | 0.263 | 0.476 | 6.112 |
| -1.081 | 0.293 | 19.000 | 1.148 | 0.476 | 6.112 |
| -0.777 | 0.447 | 19.000 | 0.324 | 0.476 | 6.112 |
| 1.748  | 0.097 | 19.000 | 0.721 | 0.476 | 6.112 |
| -0.322 | 0.751 | 19.000 | 0.352 | 0.476 | 6.112 |
| -0.936 | 0.361 | 19.000 | 0.396 | 0.476 | 6.112 |
| 0.712  | 0.485 | 19.000 | 0.715 | 0.476 | 6.112 |
| -0.332 | 0.743 | 19.000 | 0.466 | 0.476 | 6.112 |
| -1.665 | 0.112 | 19.000 | 0.455 | 0.476 | 6.112 |
| -3.360 | 0.003 | 19.000 | 0.345 | 0.476 | 6.112 |
| 1.373  | 0.186 | 19.000 | 0.414 | 0.476 | 6.112 |
| 2.718  | 0.014 | 19.000 | 0.300 | 0.476 | 6.112 |
| -0.938 | 0.360 | 19.000 | 0.418 | 0.476 | 6.112 |
| 0.256  | 0.801 | 19.000 | 0.433 | 0.476 | 6.112 |
| 2.142  | 0.045 | 19.000 | 0.673 | 0.476 | 6.112 |
| 2.759  | 0.012 | 19.000 | 0.512 | 0.476 | 6.112 |
| 1.989  | 0.061 | 19.000 | 0.413 | 0.476 | 6.112 |
| 1.268  | 0.220 | 19.000 | 0.413 | 0.476 | 6.112 |
| -2.009 | 0.059 | 19.000 | 0.615 | 0.476 | 6.112 |
| -2.246 | 0.037 | 19.000 | 0.360 | 0.476 | 6.112 |
| -2.902 | 0.009 | 19.000 | 0.428 | 0.476 | 6.112 |
| -2.791 | 0.012 | 19.000 | 0.366 | 0.476 | 6.112 |
| 1.237  | 0.231 | 19.000 | 0.477 | 0.476 | 6.112 |
| 1.983  | 0.062 | 19.000 | 0.541 | 0.476 | 6.112 |

|        |       |        |       |       |       |
|--------|-------|--------|-------|-------|-------|
| 0.798  | 0.435 | 19.000 | 0.433 | 0.476 | 6.112 |
| 1.563  | 0.134 | 19.000 | 0.451 | 0.476 | 6.112 |
| 1.175  | 0.255 | 19.000 | 0.284 | 0.476 | 6.112 |
| 3.221  | 0.004 | 19.000 | 0.375 | 0.476 | 6.112 |
| 2.184  | 0.042 | 19.000 | 0.679 | 0.476 | 6.112 |
| 1.871  | 0.077 | 19.000 | 0.735 | 0.476 | 6.112 |
| 1.182  | 0.252 | 19.000 | 0.723 | 0.476 | 6.112 |
| 1.653  | 0.115 | 19.000 | 0.603 | 0.476 | 6.112 |
| 2.174  | 0.043 | 19.000 | 0.248 | 0.476 | 6.112 |
| 0.337  | 0.740 | 19.000 | 0.716 | 0.476 | 6.112 |
| -0.530 | 0.602 | 19.000 | 0.400 | 0.476 | 6.112 |
| 2.118  | 0.048 | 19.000 | 0.475 | 0.476 | 6.112 |
| 0.999  | 0.330 | 19.000 | 0.257 | 0.476 | 6.112 |
| 1.668  | 0.112 | 19.000 | 0.362 | 0.476 | 6.112 |
| 2.362  | 0.029 | 19.000 | 0.424 | 0.476 | 6.112 |
| 2.402  | 0.027 | 19.000 | 0.723 | 0.476 | 6.112 |
| -0.343 | 0.736 | 19.000 | 0.510 | 0.476 | 6.112 |
| 2.008  | 0.059 | 19.000 | 0.391 | 0.476 | 6.112 |
| 2.420  | 0.026 | 19.000 | 0.786 | 0.476 | 6.112 |
| 0.658  | 0.518 | 19.000 | 0.375 | 0.476 | 6.112 |
| -1.895 | 0.073 | 19.000 | 0.657 | 0.476 | 6.112 |
| -2.491 | 0.022 | 19.000 | 0.605 | 0.476 | 6.112 |
| -2.017 | 0.058 | 19.000 | 0.651 | 0.476 | 6.112 |
| -0.596 | 0.558 | 19.000 | 0.530 | 0.476 | 6.112 |
| -2.085 | 0.051 | 19.000 | 0.536 | 0.476 | 6.112 |
| 0.049  | 0.961 | 19.000 | 0.447 | 0.476 | 6.112 |
| 1.686  | 0.108 | 19.000 | 0.367 | 0.476 | 6.112 |
| 2.405  | 0.027 | 19.000 | 0.339 | 0.476 | 6.112 |
| 2.204  | 0.040 | 19.000 | 0.707 | 0.476 | 6.112 |
| 0.269  | 0.791 | 19.000 | 0.348 | 0.476 | 6.112 |
| -0.134 | 0.895 | 19.000 | 0.575 | 0.476 | 6.112 |
| 0.135  | 0.894 | 19.000 | 0.256 | 0.476 | 6.112 |
| 2.109  | 0.048 | 19.000 | 0.414 | 0.476 | 6.112 |
| -2.211 | 0.039 | 19.000 | 0.348 | 0.476 | 6.112 |
| -0.904 | 0.377 | 19.000 | 0.458 | 0.476 | 6.112 |
| 1.091  | 0.289 | 19.000 | 0.389 | 0.476 | 6.112 |
| 2.549  | 0.020 | 19.000 | 0.252 | 0.476 | 6.112 |
| -0.009 | 0.993 | 19.000 | 0.428 | 0.476 | 6.112 |
| 1.685  | 0.108 | 19.000 | 0.873 | 0.476 | 6.112 |
| 2.097  | 0.050 | 19.000 | 0.393 | 0.476 | 6.112 |
| -1.331 | 0.199 | 19.000 | 0.832 | 0.476 | 6.112 |
| 1.345  | 0.194 | 19.000 | 0.472 | 0.476 | 6.112 |
| 1.435  | 0.168 | 19.000 | 0.635 | 0.476 | 6.112 |
| 1.890  | 0.074 | 19.000 | 0.561 | 0.476 | 6.112 |
| 1.827  | 0.083 | 19.000 | 0.444 | 0.476 | 6.112 |
| -1.810 | 0.086 | 19.000 | 0.422 | 0.476 | 6.112 |
| 1.227  | 0.235 | 19.000 | 0.334 | 0.476 | 6.112 |
| 2.925  | 0.009 | 19.000 | 0.324 | 0.476 | 6.112 |
| 1.821  | 0.084 | 19.000 | 0.791 | 0.476 | 6.112 |
| -1.997 | 0.060 | 19.000 | 0.750 | 0.476 | 6.112 |

|        |       |        |       |       |       |
|--------|-------|--------|-------|-------|-------|
| -1.173 | 0.255 | 19.000 | 0.673 | 0.476 | 6.112 |
| -0.291 | 0.774 | 19.000 | 0.406 | 0.476 | 6.112 |
| -2.706 | 0.014 | 19.000 | 0.404 | 0.476 | 6.112 |
| 1.214  | 0.240 | 19.000 | 0.426 | 0.476 | 6.112 |
| -1.312 | 0.205 | 19.000 | 0.299 | 0.476 | 6.112 |
| 0.843  | 0.410 | 19.000 | 0.441 | 0.476 | 6.112 |
| 0.932  | 0.363 | 19.000 | 0.254 | 0.476 | 6.112 |
| -2.348 | 0.030 | 19.000 | 0.410 | 0.476 | 6.112 |
| 2.964  | 0.008 | 19.000 | 0.302 | 0.476 | 6.112 |
| 0.704  | 0.490 | 19.000 | 0.388 | 0.476 | 6.112 |
| 1.752  | 0.096 | 19.000 | 0.376 | 0.476 | 6.112 |
| 2.422  | 0.026 | 19.000 | 0.422 | 0.476 | 6.112 |
| -1.397 | 0.178 | 19.000 | 0.382 | 0.476 | 6.112 |
| -2.205 | 0.040 | 19.000 | 0.404 | 0.476 | 6.112 |
| 2.247  | 0.037 | 19.000 | 0.250 | 0.476 | 6.112 |
| -1.046 | 0.309 | 19.000 | 0.588 | 0.476 | 6.112 |
| -1.931 | 0.069 | 19.000 | 0.902 | 0.476 | 6.112 |
| -2.772 | 0.012 | 19.000 | 0.474 | 0.476 | 6.112 |
| -2.236 | 0.038 | 19.000 | 0.351 | 0.476 | 6.112 |
| 1.953  | 0.066 | 19.000 | 0.411 | 0.476 | 6.112 |
| -1.401 | 0.177 | 19.000 | 0.522 | 0.476 | 6.112 |
| 2.080  | 0.051 | 19.000 | 0.331 | 0.476 | 6.112 |
| 3.710  | 0.001 | 19.000 | 0.270 | 0.476 | 6.112 |
| -1.567 | 0.134 | 19.000 | 0.417 | 0.476 | 6.112 |
| 1.114  | 0.279 | 19.000 | 0.875 | 0.476 | 6.112 |
| 1.069  | 0.299 | 19.000 | 0.252 | 0.476 | 6.112 |
| 1.379  | 0.184 | 19.000 | 0.272 | 0.476 | 6.112 |
| -0.389 | 0.702 | 19.000 | 0.429 | 0.476 | 6.112 |
| 2.940  | 0.008 | 19.000 | 0.769 | 0.476 | 6.112 |
| 2.307  | 0.032 | 19.000 | 0.948 | 0.476 | 6.112 |
| 1.798  | 0.088 | 19.000 | 1.105 | 0.476 | 6.112 |
| 2.256  | 0.036 | 19.000 | 0.345 | 0.476 | 6.112 |
| 0.986  | 0.337 | 19.000 | 0.451 | 0.476 | 6.112 |
| -0.807 | 0.429 | 19.000 | 0.519 | 0.476 | 6.112 |
| 2.710  | 0.014 | 19.000 | 0.265 | 0.476 | 6.112 |
| 2.295  | 0.033 | 19.000 | 0.289 | 0.476 | 6.112 |
| 0.404  | 0.691 | 19.000 | 0.297 | 0.476 | 6.112 |
| 0.288  | 0.777 | 19.000 | 0.535 | 0.476 | 6.112 |
| 1.526  | 0.143 | 19.000 | 0.293 | 0.476 | 6.112 |
| 1.571  | 0.133 | 19.000 | 0.271 | 0.476 | 6.112 |
| -1.293 | 0.212 | 19.000 | 0.331 | 0.476 | 6.112 |
| 2.250  | 0.036 | 19.000 | 0.534 | 0.476 | 6.112 |
| 2.252  | 0.036 | 19.000 | 0.403 | 0.476 | 6.112 |
| 2.811  | 0.011 | 19.000 | 0.453 | 0.476 | 6.112 |
| 3.317  | 0.004 | 19.000 | 0.252 | 0.476 | 6.112 |
| 2.814  | 0.011 | 19.000 | 0.456 | 0.476 | 6.112 |
| 0.887  | 0.386 | 19.000 | 0.482 | 0.476 | 6.112 |
| -0.597 | 0.557 | 19.000 | 0.331 | 0.476 | 6.112 |
| 1.372  | 0.186 | 19.000 | 1.028 | 0.476 | 6.112 |
| 1.792  | 0.089 | 19.000 | 0.598 | 0.476 | 6.112 |

|        |       |        |       |       |       |
|--------|-------|--------|-------|-------|-------|
| -1.299 | 0.209 | 19.000 | 0.504 | 0.476 | 6.112 |
| 1.229  | 0.234 | 19.000 | 0.225 | 0.476 | 6.112 |
| 1.114  | 0.279 | 19.000 | 0.282 | 0.476 | 6.112 |
| 0.915  | 0.372 | 19.000 | 0.255 | 0.476 | 6.112 |
| 2.592  | 0.018 | 19.000 | 0.941 | 0.476 | 6.112 |
| -0.419 | 0.680 | 19.000 | 0.514 | 0.476 | 6.112 |
| 2.112  | 0.048 | 19.000 | 0.522 | 0.476 | 6.112 |
| 1.811  | 0.086 | 19.000 | 0.331 | 0.476 | 6.112 |
| -0.606 | 0.552 | 19.000 | 0.482 | 0.476 | 6.112 |
| -1.237 | 0.231 | 19.000 | 0.493 | 0.476 | 6.112 |
| 2.586  | 0.018 | 19.000 | 0.286 | 0.476 | 6.112 |
| 0.739  | 0.469 | 19.000 | 0.490 | 0.476 | 6.112 |
| -0.884 | 0.388 | 19.000 | 0.644 | 0.476 | 6.112 |
| 0.964  | 0.347 | 19.000 | 0.344 | 0.476 | 6.112 |
| 0.247  | 0.807 | 19.000 | 0.380 | 0.476 | 6.112 |
| 2.312  | 0.032 | 19.000 | 0.820 | 0.476 | 6.112 |
| 2.728  | 0.013 | 19.000 | 0.512 | 0.476 | 6.112 |
| -1.614 | 0.123 | 19.000 | 0.566 | 0.476 | 6.112 |
| 2.644  | 0.016 | 19.000 | 0.427 | 0.476 | 6.112 |
| 1.659  | 0.114 | 19.000 | 0.558 | 0.476 | 6.112 |
| -1.922 | 0.070 | 19.000 | 0.414 | 0.476 | 6.112 |
| 2.236  | 0.038 | 19.000 | 0.868 | 0.476 | 6.112 |
| 1.513  | 0.147 | 19.000 | 0.422 | 0.476 | 6.112 |
| -0.515 | 0.613 | 19.000 | 0.393 | 0.476 | 6.112 |
| 2.630  | 0.016 | 19.000 | 0.294 | 0.476 | 6.112 |
| 1.877  | 0.076 | 19.000 | 0.970 | 0.476 | 6.112 |
| -0.493 | 0.627 | 19.000 | 0.442 | 0.476 | 6.112 |
| 2.334  | 0.031 | 19.000 | 0.601 | 0.476 | 6.112 |
| 1.207  | 0.242 | 19.000 | 0.453 | 0.476 | 6.112 |
| 1.963  | 0.064 | 19.000 | 0.376 | 0.476 | 6.112 |
| -2.408 | 0.026 | 19.000 | 0.501 | 0.476 | 6.112 |
| -1.379 | 0.184 | 19.000 | 0.461 | 0.476 | 6.112 |
| -0.944 | 0.357 | 19.000 | 0.487 | 0.476 | 6.112 |
| -1.582 | 0.130 | 19.000 | 0.439 | 0.476 | 6.112 |
| -0.621 | 0.542 | 19.000 | 0.419 | 0.476 | 6.112 |
| -0.481 | 0.636 | 19.000 | 0.603 | 0.476 | 6.112 |
| 2.845  | 0.010 | 19.000 | 0.380 | 0.476 | 6.112 |
| 1.823  | 0.084 | 19.000 | 0.655 | 0.476 | 6.112 |
| 1.850  | 0.080 | 19.000 | 0.492 | 0.476 | 6.112 |
| 2.273  | 0.035 | 19.000 | 0.500 | 0.476 | 6.112 |
| 2.076  | 0.052 | 19.000 | 0.610 | 0.476 | 6.112 |
| 1.545  | 0.139 | 19.000 | 0.439 | 0.476 | 6.112 |
| 0.182  | 0.857 | 19.000 | 0.440 | 0.476 | 6.112 |
| 1.537  | 0.141 | 19.000 | 0.677 | 0.476 | 6.112 |
| -2.746 | 0.013 | 19.000 | 0.525 | 0.476 | 6.112 |
| 2.712  | 0.014 | 19.000 | 0.435 | 0.476 | 6.112 |
| -0.885 | 0.387 | 19.000 | 0.394 | 0.476 | 6.112 |
| 0.899  | 0.380 | 19.000 | 0.378 | 0.476 | 6.112 |
| 2.417  | 0.026 | 19.000 | 0.850 | 0.476 | 6.112 |
| 0.251  | 0.804 | 19.000 | 0.460 | 0.476 | 6.112 |

|        |       |        |       |       |       |
|--------|-------|--------|-------|-------|-------|
| -0.990 | 0.335 | 19.000 | 0.406 | 0.476 | 6.112 |
| -1.635 | 0.119 | 19.000 | 0.425 | 0.476 | 6.112 |
| -2.624 | 0.017 | 19.000 | 0.354 | 0.476 | 6.112 |
| -1.445 | 0.165 | 19.000 | 0.409 | 0.476 | 6.112 |
| -0.181 | 0.858 | 19.000 | 0.449 | 0.476 | 6.112 |
| 2.929  | 0.009 | 19.000 | 0.338 | 0.476 | 6.112 |
| -3.172 | 0.005 | 19.000 | 0.352 | 0.476 | 6.112 |
| -1.552 | 0.137 | 19.000 | 0.429 | 0.476 | 6.112 |
| 0.255  | 0.802 | 19.000 | 0.357 | 0.476 | 6.112 |
| -3.274 | 0.004 | 19.000 | 0.484 | 0.476 | 6.112 |
| 1.553  | 0.137 | 19.000 | 0.395 | 0.476 | 6.112 |
| 0.865  | 0.398 | 19.000 | 0.449 | 0.476 | 6.112 |
| 2.917  | 0.009 | 19.000 | 0.334 | 0.476 | 6.112 |
| -1.391 | 0.180 | 19.000 | 0.441 | 0.476 | 6.112 |
| 2.592  | 0.018 | 19.000 | 0.895 | 0.476 | 6.112 |
| 3.010  | 0.007 | 19.000 | 0.806 | 0.476 | 6.112 |
| -2.293 | 0.033 | 19.000 | 0.336 | 0.476 | 6.112 |
| 0.747  | 0.464 | 19.000 | 0.778 | 0.476 | 6.112 |
| 0.520  | 0.609 | 19.000 | 0.385 | 0.476 | 6.112 |
| 0.098  | 0.923 | 19.000 | 0.472 | 0.476 | 6.112 |
| -1.626 | 0.121 | 19.000 | 0.542 | 0.476 | 6.112 |
| 1.609  | 0.124 | 19.000 | 0.399 | 0.476 | 6.112 |
| -1.943 | 0.067 | 19.000 | 0.366 | 0.476 | 6.112 |
| 2.109  | 0.048 | 19.000 | 0.584 | 0.476 | 6.112 |
| -0.927 | 0.366 | 19.000 | 0.445 | 0.476 | 6.112 |
| 0.263  | 0.795 | 19.000 | 0.413 | 0.476 | 6.112 |
| 1.883  | 0.075 | 19.000 | 0.306 | 0.476 | 6.112 |
| -1.898 | 0.073 | 19.000 | 0.398 | 0.476 | 6.112 |
| -1.499 | 0.150 | 19.000 | 0.440 | 0.476 | 6.112 |
| 1.516  | 0.146 | 19.000 | 0.398 | 0.476 | 6.112 |
| 1.510  | 0.147 | 19.000 | 0.584 | 0.476 | 6.112 |
| 2.078  | 0.051 | 19.000 | 0.461 | 0.476 | 6.112 |
| 1.131  | 0.272 | 19.000 | 0.462 | 0.476 | 6.112 |
| 1.705  | 0.105 | 19.000 | 0.584 | 0.476 | 6.112 |
| -1.122 | 0.276 | 19.000 | 0.885 | 0.476 | 6.112 |
| 0.541  | 0.595 | 19.000 | 0.726 | 0.476 | 6.112 |
| 1.855  | 0.079 | 19.000 | 0.756 | 0.476 | 6.112 |
| 0.917  | 0.371 | 19.000 | 0.469 | 0.476 | 6.112 |
| 2.187  | 0.041 | 19.000 | 0.590 | 0.476 | 6.112 |
| 1.629  | 0.120 | 19.000 | 0.519 | 0.476 | 6.112 |
| -0.312 | 0.758 | 19.000 | 0.517 | 0.476 | 6.112 |
| 1.195  | 0.247 | 19.000 | 0.449 | 0.476 | 6.112 |
| 0.951  | 0.354 | 19.000 | 0.416 | 0.476 | 6.112 |
| -0.808 | 0.429 | 19.000 | 0.302 | 0.476 | 6.112 |
| 2.148  | 0.045 | 19.000 | 0.388 | 0.476 | 6.112 |
| -2.683 | 0.015 | 19.000 | 0.354 | 0.476 | 6.112 |
| 1.283  | 0.215 | 19.000 | 0.343 | 0.476 | 6.112 |
| 1.866  | 0.078 | 19.000 | 0.545 | 0.476 | 6.112 |
| -1.697 | 0.106 | 19.000 | 0.527 | 0.476 | 6.112 |
| -0.526 | 0.605 | 19.000 | 0.591 | 0.476 | 6.112 |

|        |       |        |       |       |       |
|--------|-------|--------|-------|-------|-------|
| 0.392  | 0.699 | 19.000 | 0.415 | 0.476 | 6.112 |
| -1.600 | 0.126 | 19.000 | 0.767 | 0.476 | 6.112 |
| -1.614 | 0.123 | 19.000 | 0.868 | 0.476 | 6.112 |
| 1.188  | 0.249 | 19.000 | 0.371 | 0.476 | 6.112 |
| -0.383 | 0.706 | 19.000 | 0.359 | 0.476 | 6.112 |
| 1.065  | 0.300 | 19.000 | 0.537 | 0.476 | 6.112 |
| 0.535  | 0.599 | 19.000 | 0.703 | 0.476 | 6.112 |
| 1.130  | 0.273 | 19.000 | 1.180 | 0.476 | 6.112 |
| 1.318  | 0.203 | 19.000 | 0.683 | 0.476 | 6.112 |
| -1.649 | 0.116 | 19.000 | 0.521 | 0.476 | 6.112 |
| -1.873 | 0.077 | 19.000 | 0.340 | 0.476 | 6.112 |
| -2.718 | 0.014 | 19.000 | 0.567 | 0.476 | 6.112 |
| 2.720  | 0.014 | 19.000 | 0.466 | 0.476 | 6.112 |
| 2.930  | 0.009 | 19.000 | 0.263 | 0.476 | 6.112 |
| 1.218  | 0.238 | 19.000 | 0.297 | 0.476 | 6.112 |
| 1.227  | 0.235 | 19.000 | 0.565 | 0.476 | 6.112 |
| -0.455 | 0.654 | 19.000 | 0.663 | 0.476 | 6.112 |
| -1.226 | 0.235 | 19.000 | 0.506 | 0.476 | 6.112 |
| -2.210 | 0.040 | 19.000 | 0.382 | 0.476 | 6.112 |
| -3.380 | 0.003 | 19.000 | 0.717 | 0.476 | 6.112 |
| 0.901  | 0.379 | 19.000 | 0.446 | 0.476 | 6.112 |
| 2.324  | 0.031 | 19.000 | 0.250 | 0.476 | 6.112 |
| 0.635  | 0.533 | 19.000 | 0.258 | 0.476 | 6.112 |
| 1.608  | 0.124 | 19.000 | 0.442 | 0.476 | 6.112 |
| -0.571 | 0.575 | 19.000 | 0.258 | 0.476 | 6.112 |
| 1.556  | 0.136 | 19.000 | 0.568 | 0.476 | 6.112 |
| 2.404  | 0.027 | 19.000 | 0.686 | 0.476 | 6.112 |
| 0.882  | 0.389 | 19.000 | 0.473 | 0.476 | 6.112 |
| 1.542  | 0.140 | 19.000 | 0.323 | 0.476 | 6.112 |
| 0.012  | 0.991 | 19.000 | 0.342 | 0.476 | 6.112 |
| 1.034  | 0.314 | 19.000 | 0.395 | 0.476 | 6.112 |
| 1.514  | 0.146 | 19.000 | 0.324 | 0.476 | 6.112 |
| 2.118  | 0.048 | 19.000 | 0.952 | 0.476 | 6.112 |
| 1.796  | 0.088 | 19.000 | 0.473 | 0.476 | 6.112 |
| -0.613 | 0.547 | 19.000 | 0.435 | 0.476 | 6.112 |
| 0.738  | 0.469 | 19.000 | 0.457 | 0.476 | 6.112 |
| 2.374  | 0.028 | 19.000 | 0.343 | 0.476 | 6.112 |
| 0.862  | 0.400 | 19.000 | 0.551 | 0.476 | 6.112 |
| -1.074 | 0.296 | 19.000 | 0.418 | 0.476 | 6.112 |
| -0.486 | 0.633 | 19.000 | 0.456 | 0.476 | 6.112 |
| -0.932 | 0.363 | 19.000 | 0.586 | 0.476 | 6.112 |
| -1.928 | 0.069 | 19.000 | 0.331 | 0.476 | 6.112 |
| 2.820  | 0.011 | 19.000 | 0.388 | 0.476 | 6.112 |
| -1.167 | 0.258 | 19.000 | 0.487 | 0.476 | 6.112 |
| 2.163  | 0.044 | 19.000 | 0.402 | 0.476 | 6.112 |
| -0.109 | 0.915 | 19.000 | 0.457 | 0.476 | 6.112 |
| -0.941 | 0.358 | 19.000 | 0.454 | 0.476 | 6.112 |
| -1.470 | 0.158 | 19.000 | 0.625 | 0.476 | 6.112 |
| 2.168  | 0.043 | 19.000 | 0.254 | 0.476 | 6.112 |
| -2.943 | 0.008 | 19.000 | 0.649 | 0.476 | 6.112 |

|        |       |        |       |       |       |
|--------|-------|--------|-------|-------|-------|
| -2.440 | 0.025 | 19.000 | 0.602 | 0.476 | 6.112 |
| 2.231  | 0.038 | 19.000 | 0.641 | 0.476 | 6.112 |
| 3.201  | 0.005 | 19.000 | 0.490 | 0.476 | 6.112 |
| 1.591  | 0.128 | 19.000 | 0.864 | 0.476 | 6.112 |
| -2.699 | 0.014 | 19.000 | 0.913 | 0.476 | 6.112 |
| -0.308 | 0.761 | 19.000 | 0.475 | 0.476 | 6.112 |
| -2.124 | 0.047 | 19.000 | 0.460 | 0.476 | 6.112 |
| -2.077 | 0.052 | 19.000 | 0.796 | 0.476 | 6.112 |
| -0.322 | 0.751 | 19.000 | 0.426 | 0.476 | 6.112 |
| 3.127  | 0.006 | 19.000 | 0.490 | 0.476 | 6.112 |
| -1.596 | 0.127 | 19.000 | 0.559 | 0.476 | 6.112 |
| -2.285 | 0.034 | 19.000 | 0.482 | 0.476 | 6.112 |
| 0.803  | 0.432 | 19.000 | 0.412 | 0.476 | 6.112 |
| -2.108 | 0.049 | 19.000 | 0.730 | 0.476 | 6.112 |
| -2.576 | 0.019 | 19.000 | 0.390 | 0.476 | 6.112 |
| -1.871 | 0.077 | 19.000 | 0.548 | 0.476 | 6.112 |
| -1.521 | 0.145 | 19.000 | 0.768 | 0.476 | 6.112 |
| -0.003 | 0.997 | 19.000 | 0.559 | 0.476 | 6.112 |
| 2.877  | 0.010 | 19.000 | 0.372 | 0.476 | 6.112 |
| 1.681  | 0.109 | 19.000 | 0.375 | 0.476 | 6.112 |
| 2.304  | 0.033 | 19.000 | 1.561 | 0.476 | 6.112 |
| -0.537 | 0.597 | 19.000 | 0.817 | 0.476 | 6.112 |
| 2.309  | 0.032 | 19.000 | 0.501 | 0.476 | 6.112 |
| 1.487  | 0.154 | 19.000 | 0.681 | 0.476 | 6.112 |
| 3.126  | 0.006 | 19.000 | 0.218 | 0.476 | 6.112 |
| 0.773  | 0.449 | 19.000 | 0.364 | 0.476 | 6.112 |
| 2.942  | 0.008 | 19.000 | 0.278 | 0.476 | 6.112 |
| 0.889  | 0.385 | 19.000 | 0.350 | 0.476 | 6.112 |
| -0.381 | 0.708 | 19.000 | 0.642 | 0.476 | 6.112 |
| -3.434 | 0.003 | 19.000 | 0.375 | 0.476 | 6.112 |
| 0.970  | 0.344 | 19.000 | 0.481 | 0.476 | 6.112 |
| 1.632  | 0.119 | 19.000 | 0.409 | 0.476 | 6.112 |
| 2.362  | 0.029 | 19.000 | 0.341 | 0.476 | 6.112 |
| 3.011  | 0.007 | 19.000 | 0.818 | 0.476 | 6.112 |
| 1.093  | 0.288 | 19.000 | 0.530 | 0.476 | 6.112 |
| 1.491  | 0.152 | 19.000 | 0.694 | 0.476 | 6.112 |
| 1.046  | 0.309 | 19.000 | 0.346 | 0.476 | 6.112 |
| -1.567 | 0.134 | 19.000 | 0.329 | 0.476 | 6.112 |
| 0.360  | 0.723 | 19.000 | 0.491 | 0.476 | 6.112 |
| 1.565  | 0.134 | 19.000 | 0.479 | 0.476 | 6.112 |
| -0.117 | 0.908 | 19.000 | 0.464 | 0.476 | 6.112 |
| 1.238  | 0.231 | 19.000 | 0.293 | 0.476 | 6.112 |
| 1.865  | 0.078 | 19.000 | 0.314 | 0.476 | 6.112 |
| 2.684  | 0.015 | 19.000 | 0.327 | 0.476 | 6.112 |
| -0.012 | 0.990 | 19.000 | 0.433 | 0.476 | 6.112 |
| 1.928  | 0.069 | 19.000 | 0.469 | 0.476 | 6.112 |
| -0.268 | 0.792 | 19.000 | 0.410 | 0.476 | 6.112 |
| 1.756  | 0.095 | 19.000 | 0.363 | 0.476 | 6.112 |
| 1.007  | 0.327 | 19.000 | 0.381 | 0.476 | 6.112 |
| 0.588  | 0.563 | 19.000 | 0.520 | 0.476 | 6.112 |



|        |       |        |       |       |       |
|--------|-------|--------|-------|-------|-------|
| 0.880  | 0.390 | 19.000 | 0.364 | 0.476 | 6.112 |
| 1.964  | 0.064 | 19.000 | 0.523 | 0.476 | 6.112 |
| 1.416  | 0.173 | 19.000 | 0.417 | 0.476 | 6.112 |
| -0.536 | 0.598 | 19.000 | 0.415 | 0.476 | 6.112 |
| 1.652  | 0.115 | 19.000 | 0.378 | 0.476 | 6.112 |
| 1.818  | 0.085 | 19.000 | 0.581 | 0.476 | 6.112 |
| -0.557 | 0.584 | 19.000 | 0.444 | 0.476 | 6.112 |
| 1.211  | 0.241 | 19.000 | 0.343 | 0.476 | 6.112 |
| 2.311  | 0.032 | 19.000 | 0.297 | 0.476 | 6.112 |
| -0.319 | 0.753 | 19.000 | 0.616 | 0.476 | 6.112 |
| -1.347 | 0.194 | 19.000 | 0.515 | 0.476 | 6.112 |
| 2.425  | 0.025 | 19.000 | 0.299 | 0.476 | 6.112 |
| 0.085  | 0.933 | 19.000 | 0.520 | 0.476 | 6.112 |
| 0.709  | 0.487 | 19.000 | 0.429 | 0.476 | 6.112 |
| 0.360  | 0.723 | 19.000 | 0.565 | 0.476 | 6.112 |
| -0.885 | 0.387 | 19.000 | 0.381 | 0.476 | 6.112 |
| -1.749 | 0.096 | 19.000 | 0.728 | 0.476 | 6.112 |
| -1.259 | 0.223 | 19.000 | 0.534 | 0.476 | 6.112 |
| -1.196 | 0.246 | 19.000 | 0.439 | 0.476 | 6.112 |
| 1.015  | 0.323 | 19.000 | 0.492 | 0.476 | 6.112 |
| -1.601 | 0.126 | 19.000 | 0.418 | 0.476 | 6.112 |
| -0.265 | 0.794 | 19.000 | 0.415 | 0.476 | 6.112 |
| -1.218 | 0.238 | 19.000 | 0.468 | 0.476 | 6.112 |
| 0.015  | 0.988 | 19.000 | 0.585 | 0.476 | 6.112 |
| 2.980  | 0.008 | 19.000 | 1.141 | 0.476 | 6.112 |
| -0.909 | 0.375 | 19.000 | 0.782 | 0.476 | 6.112 |
| -0.529 | 0.603 | 19.000 | 0.872 | 0.476 | 6.112 |
| -0.009 | 0.993 | 19.000 | 0.946 | 0.476 | 6.112 |
| 0.341  | 0.737 | 19.000 | 0.497 | 0.476 | 6.112 |
| -2.080 | 0.051 | 19.000 | 0.499 | 0.476 | 6.112 |
| 1.923  | 0.070 | 19.000 | 0.428 | 0.476 | 6.112 |
| 1.838  | 0.082 | 19.000 | 0.434 | 0.476 | 6.112 |
| 0.474  | 0.641 | 19.000 | 0.451 | 0.476 | 6.112 |
| -2.403 | 0.027 | 19.000 | 0.380 | 0.476 | 6.112 |
| -0.134 | 0.895 | 19.000 | 0.461 | 0.476 | 6.112 |
| 0.899  | 0.380 | 19.000 | 0.560 | 0.476 | 6.112 |
| -2.031 | 0.056 | 19.000 | 0.332 | 0.476 | 6.112 |
| -1.773 | 0.092 | 19.000 | 0.514 | 0.476 | 6.112 |
| 1.508  | 0.148 | 19.000 | 0.475 | 0.476 | 6.112 |
| 0.025  | 0.980 | 19.000 | 0.313 | 0.476 | 6.112 |
| -0.627 | 0.538 | 19.000 | 0.931 | 0.476 | 6.112 |
| -0.428 | 0.673 | 19.000 | 0.431 | 0.476 | 6.112 |
| 0.849  | 0.406 | 19.000 | 0.414 | 0.476 | 6.112 |
| -1.204 | 0.243 | 19.000 | 0.765 | 0.476 | 6.112 |
| -0.577 | 0.571 | 19.000 | 0.917 | 0.476 | 6.112 |
| -0.570 | 0.576 | 19.000 | 0.836 | 0.476 | 6.112 |
| -1.134 | 0.271 | 19.000 | 0.605 | 0.476 | 6.112 |
| 0.399  | 0.694 | 19.000 | 0.605 | 0.476 | 6.112 |
| 2.316  | 0.032 | 19.000 | 1.520 | 0.476 | 6.112 |
| -0.706 | 0.489 | 19.000 | 0.549 | 0.476 | 6.112 |

|        |       |        |       |       |       |
|--------|-------|--------|-------|-------|-------|
| 1.779  | 0.091 | 19.000 | 0.816 | 0.476 | 6.112 |
| -0.517 | 0.611 | 19.000 | 0.495 | 0.476 | 6.112 |
| 0.263  | 0.796 | 19.000 | 0.407 | 0.476 | 6.112 |
| 1.317  | 0.203 | 19.000 | 0.549 | 0.476 | 6.112 |
| 0.760  | 0.456 | 19.000 | 0.466 | 0.476 | 6.112 |
| 1.296  | 0.210 | 19.000 | 0.501 | 0.476 | 6.112 |
| -0.388 | 0.703 | 19.000 | 0.465 | 0.476 | 6.112 |
| -0.356 | 0.726 | 19.000 | 0.477 | 0.476 | 6.112 |
| -0.349 | 0.731 | 19.000 | 0.456 | 0.476 | 6.112 |
| -0.317 | 0.755 | 19.000 | 0.449 | 0.476 | 6.112 |
| 0.220  | 0.828 | 19.000 | 0.564 | 0.476 | 6.112 |
| -1.200 | 0.245 | 19.000 | 0.395 | 0.476 | 6.112 |
| 0.208  | 0.837 | 19.000 | 0.411 | 0.476 | 6.112 |
| 1.929  | 0.069 | 19.000 | 0.712 | 0.476 | 6.112 |
| -0.694 | 0.496 | 19.000 | 0.363 | 0.476 | 6.112 |
| -0.277 | 0.785 | 19.000 | 0.569 | 0.476 | 6.112 |
| -1.570 | 0.133 | 19.000 | 1.341 | 0.476 | 6.112 |
| -0.693 | 0.497 | 19.000 | 0.470 | 0.476 | 6.112 |
| -1.954 | 0.066 | 19.000 | 0.553 | 0.476 | 6.112 |
| -3.364 | 0.003 | 19.000 | 0.324 | 0.476 | 6.112 |
| -2.379 | 0.028 | 19.000 | 0.718 | 0.476 | 6.112 |
| 1.644  | 0.117 | 19.000 | 0.737 | 0.476 | 6.112 |
| -0.888 | 0.386 | 19.000 | 0.438 | 0.476 | 6.112 |
| -1.930 | 0.069 | 19.000 | 0.418 | 0.476 | 6.112 |
| -1.524 | 0.144 | 19.000 | 0.566 | 0.476 | 6.112 |
| -1.905 | 0.072 | 19.000 | 0.257 | 0.476 | 6.112 |
| 0.500  | 0.623 | 19.000 | 0.383 | 0.476 | 6.112 |
| 1.858  | 0.079 | 19.000 | 0.272 | 0.476 | 6.112 |
| 2.141  | 0.045 | 19.000 | 0.501 | 0.476 | 6.112 |
| -0.453 | 0.655 | 19.000 | 0.386 | 0.476 | 6.112 |
| 1.349  | 0.193 | 19.000 | 0.534 | 0.476 | 6.112 |
| -2.244 | 0.037 | 19.000 | 0.494 | 0.476 | 6.112 |
| 1.479  | 0.156 | 19.000 | 0.283 | 0.476 | 6.112 |
| 0.475  | 0.640 | 19.000 | 0.380 | 0.476 | 6.112 |
| 2.065  | 0.053 | 19.000 | 1.048 | 0.476 | 6.112 |
| -1.278 | 0.216 | 19.000 | 0.553 | 0.476 | 6.112 |
| -2.008 | 0.059 | 19.000 | 0.388 | 0.476 | 6.112 |
| -2.031 | 0.056 | 19.000 | 0.791 | 0.476 | 6.112 |
| -0.774 | 0.448 | 19.000 | 0.560 | 0.476 | 6.112 |
| 1.833  | 0.082 | 19.000 | 0.372 | 0.476 | 6.112 |
| 0.143  | 0.888 | 19.000 | 0.372 | 0.476 | 6.112 |
| 3.847  | 0.001 | 19.000 | 0.286 | 0.476 | 6.112 |
| -0.234 | 0.817 | 19.000 | 0.422 | 0.476 | 6.112 |
| -1.451 | 0.163 | 19.000 | 0.364 | 0.476 | 6.112 |
| 1.718  | 0.102 | 19.000 | 0.411 | 0.476 | 6.112 |
| 2.821  | 0.011 | 19.000 | 1.328 | 0.476 | 6.112 |
| -0.883 | 0.388 | 19.000 | 0.765 | 0.476 | 6.112 |
| -0.870 | 0.395 | 19.000 | 0.786 | 0.476 | 6.112 |
| -1.084 | 0.292 | 19.000 | 0.773 | 0.476 | 6.112 |
| -1.035 | 0.314 | 19.000 | 0.786 | 0.476 | 6.112 |

|        |       |        |       |       |       |
|--------|-------|--------|-------|-------|-------|
| -1.014 | 0.323 | 19.000 | 0.799 | 0.476 | 6.112 |
| -0.988 | 0.336 | 19.000 | 0.807 | 0.476 | 6.112 |
| -0.869 | 0.396 | 19.000 | 0.781 | 0.476 | 6.112 |
| -0.877 | 0.391 | 19.000 | 0.691 | 0.476 | 6.112 |
| -0.788 | 0.440 | 19.000 | 0.713 | 0.476 | 6.112 |
| 2.484  | 0.023 | 19.000 | 0.440 | 0.476 | 6.112 |
| -2.589 | 0.018 | 19.000 | 0.403 | 0.476 | 6.112 |
| -1.564 | 0.134 | 19.000 | 0.503 | 0.476 | 6.112 |
| 1.488  | 0.153 | 19.000 | 0.701 | 0.476 | 6.112 |
| -1.327 | 0.200 | 19.000 | 0.506 | 0.476 | 6.112 |
| 0.360  | 0.723 | 19.000 | 1.193 | 0.476 | 6.112 |
| 0.306  | 0.763 | 19.000 | 0.703 | 0.476 | 6.112 |
| 1.839  | 0.082 | 19.000 | 0.323 | 0.476 | 6.112 |
| 0.105  | 0.917 | 19.000 | 1.079 | 0.476 | 6.112 |
| 0.280  | 0.783 | 19.000 | 0.449 | 0.476 | 6.112 |
| 5.026  | 0.000 | 19.000 | 0.337 | 0.476 | 6.112 |
| -3.621 | 0.002 | 19.000 | 0.364 | 0.476 | 6.112 |
| 0.901  | 0.379 | 19.000 | 0.737 | 0.476 | 6.112 |
| 0.201  | 0.843 | 19.000 | 0.450 | 0.476 | 6.112 |
| -1.036 | 0.313 | 19.000 | 0.415 | 0.476 | 6.112 |
| -1.292 | 0.212 | 19.000 | 0.912 | 0.476 | 6.112 |
| 1.712  | 0.103 | 19.000 | 0.303 | 0.476 | 6.112 |
| 1.781  | 0.091 | 19.000 | 0.309 | 0.476 | 6.112 |
| 2.222  | 0.039 | 19.000 | 0.689 | 0.476 | 6.112 |
| 1.230  | 0.234 | 19.000 | 0.663 | 0.476 | 6.112 |
| 0.874  | 0.393 | 19.000 | 0.397 | 0.476 | 6.112 |
| 1.188  | 0.250 | 19.000 | 0.547 | 0.476 | 6.112 |
| -1.930 | 0.069 | 19.000 | 0.325 | 0.476 | 6.112 |
| -1.876 | 0.076 | 19.000 | 0.345 | 0.476 | 6.112 |
| -1.811 | 0.086 | 19.000 | 0.352 | 0.476 | 6.112 |
| -2.069 | 0.052 | 19.000 | 0.261 | 0.476 | 6.112 |
| -1.705 | 0.104 | 19.000 | 0.377 | 0.476 | 6.112 |
| -1.771 | 0.093 | 19.000 | 0.258 | 0.476 | 6.112 |
| 1.443  | 0.165 | 19.000 | 0.404 | 0.476 | 6.112 |
| 0.529  | 0.603 | 19.000 | 0.541 | 0.476 | 6.112 |
| 2.273  | 0.035 | 19.000 | 0.667 | 0.476 | 6.112 |
| -1.110 | 0.281 | 19.000 | 0.458 | 0.476 | 6.112 |
| -0.497 | 0.625 | 19.000 | 0.561 | 0.476 | 6.112 |
| 1.874  | 0.076 | 19.000 | 0.421 | 0.476 | 6.112 |
| -1.214 | 0.239 | 19.000 | 0.515 | 0.476 | 6.112 |
| 2.068  | 0.053 | 19.000 | 0.426 | 0.476 | 6.112 |
| 0.442  | 0.664 | 19.000 | 0.387 | 0.476 | 6.112 |
| -0.148 | 0.884 | 19.000 | 1.039 | 0.476 | 6.112 |
| -1.403 | 0.177 | 19.000 | 0.442 | 0.476 | 6.112 |
| 0.487  | 0.632 | 19.000 | 0.498 | 0.476 | 6.112 |
| -2.424 | 0.026 | 19.000 | 0.372 | 0.476 | 6.112 |
| -1.215 | 0.239 | 19.000 | 0.637 | 0.476 | 6.112 |
| -0.167 | 0.869 | 19.000 | 0.247 | 0.476 | 6.112 |
| -2.912 | 0.009 | 19.000 | 0.367 | 0.476 | 6.112 |
| -1.449 | 0.164 | 19.000 | 0.451 | 0.476 | 6.112 |

|        |       |        |       |       |       |
|--------|-------|--------|-------|-------|-------|
| -0.547 | 0.591 | 19.000 | 0.993 | 0.476 | 6.112 |
| 2.110  | 0.048 | 19.000 | 0.655 | 0.476 | 6.112 |
| -2.706 | 0.014 | 19.000 | 0.304 | 0.476 | 6.112 |
| -0.523 | 0.607 | 19.000 | 0.480 | 0.476 | 6.112 |
| 1.586  | 0.129 | 19.000 | 0.505 | 0.476 | 6.112 |
| -2.138 | 0.046 | 19.000 | 0.460 | 0.476 | 6.112 |
| 1.002  | 0.329 | 19.000 | 0.378 | 0.476 | 6.112 |
| -0.300 | 0.767 | 19.000 | 0.420 | 0.476 | 6.112 |
| -2.209 | 0.040 | 19.000 | 0.404 | 0.476 | 6.112 |
| 1.213  | 0.240 | 19.000 | 0.430 | 0.476 | 6.112 |
| 0.887  | 0.386 | 19.000 | 0.371 | 0.476 | 6.112 |
| 1.264  | 0.221 | 19.000 | 0.301 | 0.476 | 6.112 |
| 2.319  | 0.032 | 19.000 | 0.609 | 0.476 | 6.112 |
| 1.985  | 0.062 | 19.000 | 0.620 | 0.476 | 6.112 |
| 2.198  | 0.041 | 19.000 | 0.837 | 0.476 | 6.112 |
| 2.228  | 0.038 | 19.000 | 0.321 | 0.476 | 6.112 |
| -1.588 | 0.129 | 19.000 | 0.890 | 0.476 | 6.112 |
| -2.868 | 0.010 | 19.000 | 0.572 | 0.476 | 6.112 |
| 0.748  | 0.464 | 19.000 | 0.689 | 0.476 | 6.112 |
| 0.381  | 0.707 | 19.000 | 0.629 | 0.476 | 6.112 |
| -0.649 | 0.524 | 19.000 | 0.487 | 0.476 | 6.112 |
| 2.722  | 0.014 | 19.000 | 0.961 | 0.476 | 6.112 |
| -0.768 | 0.452 | 19.000 | 0.425 | 0.476 | 6.112 |
| 0.181  | 0.859 | 19.000 | 0.401 | 0.476 | 6.112 |
| 1.039  | 0.312 | 19.000 | 0.701 | 0.476 | 6.112 |
| 0.986  | 0.337 | 19.000 | 0.394 | 0.476 | 6.112 |
| 3.159  | 0.005 | 19.000 | 0.902 | 0.476 | 6.112 |
| -0.884 | 0.388 | 19.000 | 0.846 | 0.476 | 6.112 |
| -0.180 | 0.859 | 19.000 | 0.348 | 0.476 | 6.112 |
| 2.134  | 0.046 | 19.000 | 0.678 | 0.476 | 6.112 |
| 2.036  | 0.056 | 19.000 | 0.818 | 0.476 | 6.112 |
| 2.276  | 0.035 | 19.000 | 0.603 | 0.476 | 6.112 |
| 1.447  | 0.164 | 19.000 | 0.435 | 0.476 | 6.112 |
| 1.084  | 0.292 | 19.000 | 0.449 | 0.476 | 6.112 |
| 1.561  | 0.135 | 19.000 | 1.068 | 0.476 | 6.112 |
| 1.585  | 0.129 | 19.000 | 0.529 | 0.476 | 6.112 |
| 0.865  | 0.398 | 19.000 | 0.502 | 0.476 | 6.112 |
| 2.772  | 0.012 | 19.000 | 0.779 | 0.476 | 6.112 |
| 1.686  | 0.108 | 19.000 | 0.400 | 0.476 | 6.112 |
| 0.563  | 0.580 | 19.000 | 0.787 | 0.476 | 6.112 |
| 2.386  | 0.028 | 19.000 | 0.663 | 0.476 | 6.112 |
| 1.953  | 0.066 | 19.000 | 0.724 | 0.476 | 6.112 |
| 2.364  | 0.029 | 19.000 | 0.905 | 0.476 | 6.112 |
| 1.639  | 0.118 | 19.000 | 0.574 | 0.476 | 6.112 |
| 2.655  | 0.016 | 19.000 | 0.679 | 0.476 | 6.112 |
| 1.716  | 0.102 | 19.000 | 1.092 | 0.476 | 6.112 |
| 2.249  | 0.037 | 19.000 | 1.328 | 0.476 | 6.112 |
| -1.009 | 0.326 | 19.000 | 0.449 | 0.476 | 6.112 |
| 0.478  | 0.638 | 19.000 | 0.538 | 0.476 | 6.112 |
| 2.568  | 0.019 | 19.000 | 0.996 | 0.476 | 6.112 |

|        |       |        |       |       |       |
|--------|-------|--------|-------|-------|-------|
| 2.083  | 0.051 | 19.000 | 0.422 | 0.476 | 6.112 |
| 1.588  | 0.129 | 19.000 | 0.969 | 0.476 | 6.112 |
| 1.184  | 0.251 | 19.000 | 0.505 | 0.476 | 6.112 |
| 1.951  | 0.066 | 19.000 | 0.798 | 0.476 | 6.112 |
| 2.872  | 0.010 | 19.000 | 0.843 | 0.476 | 6.112 |
| -2.313 | 0.032 | 19.000 | 0.473 | 0.476 | 6.112 |
| 0.535  | 0.599 | 19.000 | 1.079 | 0.476 | 6.112 |
| -0.668 | 0.512 | 19.000 | 1.600 | 0.476 | 6.112 |
| -1.437 | 0.167 | 19.000 | 0.514 | 0.476 | 6.112 |
| 2.241  | 0.037 | 19.000 | 0.494 | 0.476 | 6.112 |
| -0.423 | 0.677 | 19.000 | 0.359 | 0.476 | 6.112 |
| 2.121  | 0.047 | 19.000 | 0.369 | 0.476 | 6.112 |
| 1.341  | 0.196 | 19.000 | 0.815 | 0.476 | 6.112 |
| 1.627  | 0.120 | 19.000 | 0.439 | 0.476 | 6.112 |
| 2.595  | 0.018 | 19.000 | 0.652 | 0.476 | 6.112 |
| 2.004  | 0.060 | 19.000 | 1.464 | 0.476 | 6.112 |
| 2.411  | 0.026 | 19.000 | 1.274 | 0.476 | 6.112 |
| 2.434  | 0.025 | 19.000 | 0.731 | 0.476 | 6.112 |
| 4.178  | 0.001 | 19.000 | 0.276 | 0.476 | 6.112 |
| 1.181  | 0.252 | 19.000 | 0.545 | 0.476 | 6.112 |
| 1.063  | 0.301 | 19.000 | 0.457 | 0.476 | 6.112 |
| 0.278  | 0.784 | 19.000 | 0.829 | 0.476 | 6.112 |
| 2.197  | 0.041 | 19.000 | 0.904 | 0.476 | 6.112 |
| 2.563  | 0.019 | 19.000 | 0.742 | 0.476 | 6.112 |
| 2.552  | 0.019 | 19.000 | 0.782 | 0.476 | 6.112 |
| 2.536  | 0.020 | 19.000 | 1.275 | 0.476 | 6.112 |
| 2.903  | 0.009 | 19.000 | 0.284 | 0.476 | 6.112 |
| 2.266  | 0.035 | 19.000 | 0.562 | 0.476 | 6.112 |
| 1.135  | 0.271 | 19.000 | 0.354 | 0.476 | 6.112 |
| 2.081  | 0.051 | 19.000 | 0.456 | 0.476 | 6.112 |
| 1.564  | 0.134 | 19.000 | 0.294 | 0.476 | 6.112 |
| 2.460  | 0.024 | 19.000 | 0.880 | 0.476 | 6.112 |
| -0.260 | 0.797 | 19.000 | 0.400 | 0.476 | 6.112 |
| -1.462 | 0.160 | 19.000 | 0.529 | 0.476 | 6.112 |
| -2.170 | 0.043 | 19.000 | 0.805 | 0.476 | 6.112 |
| 1.251  | 0.226 | 19.000 | 0.331 | 0.476 | 6.112 |
| -2.249 | 0.037 | 19.000 | 0.636 | 0.476 | 6.112 |
| 4.029  | 0.001 | 19.000 | 0.389 | 0.476 | 6.112 |
| -0.639 | 0.531 | 19.000 | 0.491 | 0.476 | 6.112 |
| -3.446 | 0.003 | 19.000 | 0.300 | 0.476 | 6.112 |
| -2.179 | 0.042 | 19.000 | 0.891 | 0.476 | 6.112 |
| 0.373  | 0.714 | 19.000 | 1.183 | 0.476 | 6.112 |
| 1.323  | 0.202 | 19.000 | 0.570 | 0.476 | 6.112 |
| -1.162 | 0.259 | 19.000 | 0.475 | 0.476 | 6.112 |
| -0.828 | 0.418 | 19.000 | 0.562 | 0.476 | 6.112 |
| 1.844  | 0.081 | 19.000 | 0.303 | 0.476 | 6.112 |
| 1.967  | 0.064 | 19.000 | 0.661 | 0.476 | 6.112 |
| 0.057  | 0.955 | 19.000 | 0.442 | 0.476 | 6.112 |
| -1.707 | 0.104 | 19.000 | 0.388 | 0.476 | 6.112 |
| 1.246  | 0.228 | 19.000 | 0.473 | 0.476 | 6.112 |

|        |       |        |       |       |       |
|--------|-------|--------|-------|-------|-------|
| 0.500  | 0.623 | 19.000 | 0.402 | 0.476 | 6.112 |
| 2.674  | 0.015 | 19.000 | 0.733 | 0.476 | 6.112 |
| -2.344 | 0.030 | 19.000 | 0.434 | 0.476 | 6.112 |
| -0.492 | 0.629 | 19.000 | 0.370 | 0.476 | 6.112 |
| -0.381 | 0.707 | 19.000 | 0.436 | 0.476 | 6.112 |
| -1.939 | 0.068 | 19.000 | 0.399 | 0.476 | 6.112 |
| -2.418 | 0.026 | 19.000 | 0.365 | 0.476 | 6.112 |
| -0.177 | 0.862 | 19.000 | 0.579 | 0.476 | 6.112 |
| 2.594  | 0.018 | 19.000 | 1.288 | 0.476 | 6.112 |
| -0.343 | 0.735 | 19.000 | 0.428 | 0.476 | 6.112 |
| 2.322  | 0.032 | 19.000 | 0.990 | 0.476 | 6.112 |
| -2.209 | 0.040 | 19.000 | 0.412 | 0.476 | 6.112 |
| 0.402  | 0.692 | 19.000 | 0.454 | 0.476 | 6.112 |
| 1.542  | 0.139 | 19.000 | 0.439 | 0.476 | 6.112 |
| 1.862  | 0.078 | 19.000 | 0.346 | 0.476 | 6.112 |
| -2.698 | 0.014 | 19.000 | 0.334 | 0.476 | 6.112 |
| 2.495  | 0.022 | 19.000 | 0.796 | 0.476 | 6.112 |
| 0.186  | 0.855 | 19.000 | 0.433 | 0.476 | 6.112 |
| 2.514  | 0.021 | 19.000 | 0.448 | 0.476 | 6.112 |
| 2.590  | 0.018 | 19.000 | 0.331 | 0.476 | 6.112 |
| 0.479  | 0.638 | 19.000 | 0.488 | 0.476 | 6.112 |
| -1.726 | 0.101 | 19.000 | 0.651 | 0.476 | 6.112 |
| 1.236  | 0.232 | 19.000 | 0.608 | 0.476 | 6.112 |
| 3.029  | 0.007 | 19.000 | 0.450 | 0.476 | 6.112 |
| 0.152  | 0.881 | 19.000 | 0.553 | 0.476 | 6.112 |
| -0.282 | 0.781 | 19.000 | 0.560 | 0.476 | 6.112 |
| 1.854  | 0.079 | 19.000 | 0.272 | 0.476 | 6.112 |
| 0.275  | 0.786 | 19.000 | 0.435 | 0.476 | 6.112 |
| -1.700 | 0.105 | 19.000 | 0.656 | 0.476 | 6.112 |
| -1.016 | 0.322 | 19.000 | 0.401 | 0.476 | 6.112 |
| 0.315  | 0.756 | 19.000 | 0.491 | 0.476 | 6.112 |
| -0.971 | 0.344 | 19.000 | 0.772 | 0.476 | 6.112 |
| -0.958 | 0.350 | 19.000 | 0.878 | 0.476 | 6.112 |
| -1.736 | 0.099 | 19.000 | 0.476 | 0.476 | 6.112 |
| -0.474 | 0.641 | 19.000 | 0.383 | 0.476 | 6.112 |
| 2.722  | 0.014 | 19.000 | 0.556 | 0.476 | 6.112 |
| 2.695  | 0.014 | 19.000 | 0.240 | 0.476 | 6.112 |
| -1.095 | 0.287 | 19.000 | 0.524 | 0.476 | 6.112 |
| -1.261 | 0.222 | 19.000 | 0.459 | 0.476 | 6.112 |
| -1.987 | 0.062 | 19.000 | 0.402 | 0.476 | 6.112 |
| -2.888 | 0.009 | 19.000 | 0.493 | 0.476 | 6.112 |
| -0.693 | 0.497 | 19.000 | 0.548 | 0.476 | 6.112 |
| 1.162  | 0.260 | 19.000 | 0.461 | 0.476 | 6.112 |
| 0.713  | 0.484 | 19.000 | 0.595 | 0.476 | 6.112 |
| 2.416  | 0.026 | 19.000 | 0.840 | 0.476 | 6.112 |
| 0.056  | 0.956 | 19.000 | 0.508 | 0.476 | 6.112 |
| 0.819  | 0.423 | 19.000 | 0.576 | 0.476 | 6.112 |
| -0.179 | 0.860 | 19.000 | 0.574 | 0.476 | 6.112 |
| 2.559  | 0.019 | 19.000 | 0.652 | 0.476 | 6.112 |
| 0.469  | 0.645 | 19.000 | 0.395 | 0.476 | 6.112 |

|        |       |        |       |       |       |
|--------|-------|--------|-------|-------|-------|
| -0.312 | 0.759 | 19.000 | 0.490 | 0.476 | 6.112 |
| -0.165 | 0.871 | 19.000 | 0.566 | 0.476 | 6.112 |
| 0.856  | 0.403 | 19.000 | 0.479 | 0.476 | 6.112 |
| -0.870 | 0.395 | 19.000 | 0.680 | 0.476 | 6.112 |
| 1.281  | 0.216 | 19.000 | 0.408 | 0.476 | 6.112 |
| -1.308 | 0.206 | 19.000 | 0.447 | 0.476 | 6.112 |
| 1.635  | 0.119 | 19.000 | 0.327 | 0.476 | 6.112 |
| 0.485  | 0.633 | 19.000 | 0.534 | 0.476 | 6.112 |
| 1.600  | 0.126 | 19.000 | 0.545 | 0.476 | 6.112 |
| 3.246  | 0.004 | 19.000 | 0.343 | 0.476 | 6.112 |
| 3.576  | 0.002 | 19.000 | 0.433 | 0.476 | 6.112 |
| 1.222  | 0.237 | 19.000 | 0.502 | 0.476 | 6.112 |
| -0.010 | 0.992 | 19.000 | 0.437 | 0.476 | 6.112 |
| 1.554  | 0.137 | 19.000 | 0.497 | 0.476 | 6.112 |
| -1.139 | 0.269 | 19.000 | 0.363 | 0.476 | 6.112 |
| 0.211  | 0.835 | 19.000 | 0.560 | 0.476 | 6.112 |
| -1.846 | 0.081 | 19.000 | 0.505 | 0.476 | 6.112 |
| 2.411  | 0.026 | 19.000 | 0.484 | 0.476 | 6.112 |
| 0.056  | 0.956 | 19.000 | 0.390 | 0.476 | 6.112 |
| -0.235 | 0.817 | 19.000 | 0.529 | 0.476 | 6.112 |
| 2.816  | 0.011 | 19.000 | 0.922 | 0.476 | 6.112 |
| 2.689  | 0.015 | 19.000 | 0.603 | 0.476 | 6.112 |
| 2.062  | 0.053 | 19.000 | 0.547 | 0.476 | 6.112 |
| 2.543  | 0.020 | 19.000 | 1.153 | 0.476 | 6.112 |
| 0.179  | 0.860 | 19.000 | 0.659 | 0.476 | 6.112 |
| -0.819 | 0.423 | 19.000 | 0.586 | 0.476 | 6.112 |
| 0.285  | 0.779 | 19.000 | 0.675 | 0.476 | 6.112 |
| -0.486 | 0.633 | 19.000 | 0.617 | 0.476 | 6.112 |
| 0.788  | 0.440 | 19.000 | 0.432 | 0.476 | 6.112 |
| 1.888  | 0.074 | 19.000 | 0.770 | 0.476 | 6.112 |
| -1.976 | 0.063 | 19.000 | 0.638 | 0.476 | 6.112 |
| 1.712  | 0.103 | 19.000 | 0.398 | 0.476 | 6.112 |
| -1.911 | 0.071 | 19.000 | 0.471 | 0.476 | 6.112 |
| -1.307 | 0.207 | 19.000 | 0.475 | 0.476 | 6.112 |
| 2.750  | 0.013 | 19.000 | 0.477 | 0.476 | 6.112 |
| 0.507  | 0.618 | 19.000 | 0.226 | 0.476 | 6.112 |
| 0.857  | 0.402 | 19.000 | 0.401 | 0.476 | 6.112 |
| -2.579 | 0.018 | 19.000 | 0.751 | 0.476 | 6.112 |
| 1.806  | 0.087 | 19.000 | 0.428 | 0.476 | 6.112 |
| 1.323  | 0.202 | 19.000 | 0.373 | 0.476 | 6.112 |
| -0.422 | 0.678 | 19.000 | 0.384 | 0.476 | 6.112 |
| 0.972  | 0.343 | 19.000 | 0.486 | 0.476 | 6.112 |
| 0.675  | 0.508 | 19.000 | 0.405 | 0.476 | 6.112 |
| -1.551 | 0.137 | 19.000 | 0.426 | 0.476 | 6.112 |
| -0.205 | 0.839 | 19.000 | 0.765 | 0.476 | 6.112 |
| -0.240 | 0.813 | 19.000 | 0.401 | 0.476 | 6.112 |
| 1.591  | 0.128 | 19.000 | 0.418 | 0.476 | 6.112 |
| 0.865  | 0.398 | 19.000 | 0.277 | 0.476 | 6.112 |
| 2.662  | 0.015 | 19.000 | 0.641 | 0.476 | 6.112 |
| 0.673  | 0.509 | 19.000 | 0.447 | 0.476 | 6.112 |

|        |       |        |       |       |       |
|--------|-------|--------|-------|-------|-------|
| 0.124  | 0.902 | 19.000 | 0.497 | 0.476 | 6.112 |
| -0.531 | 0.601 | 19.000 | 0.901 | 0.476 | 6.112 |
| -0.006 | 0.996 | 19.000 | 0.395 | 0.476 | 6.112 |
| 0.584  | 0.566 | 19.000 | 1.306 | 0.476 | 6.112 |
| -2.014 | 0.058 | 19.000 | 0.394 | 0.476 | 6.112 |
| 0.213  | 0.834 | 19.000 | 0.957 | 0.476 | 6.112 |
| -0.189 | 0.852 | 19.000 | 1.244 | 0.476 | 6.112 |
| -0.327 | 0.747 | 19.000 | 0.849 | 0.476 | 6.112 |
| 1.594  | 0.127 | 19.000 | 0.489 | 0.476 | 6.112 |
| 0.794  | 0.437 | 19.000 | 0.576 | 0.476 | 6.112 |
| -2.660 | 0.015 | 19.000 | 0.860 | 0.476 | 6.112 |
| -0.880 | 0.390 | 19.000 | 0.667 | 0.476 | 6.112 |
| 1.188  | 0.249 | 19.000 | 0.766 | 0.476 | 6.112 |
| 0.805  | 0.431 | 19.000 | 0.442 | 0.476 | 6.112 |
| -0.598 | 0.557 | 19.000 | 0.764 | 0.476 | 6.112 |
| -0.032 | 0.975 | 19.000 | 0.527 | 0.476 | 6.112 |
| -0.918 | 0.370 | 19.000 | 0.525 | 0.476 | 6.112 |
| -1.015 | 0.323 | 19.000 | 0.553 | 0.476 | 6.112 |
| 1.036  | 0.313 | 19.000 | 0.589 | 0.476 | 6.112 |
| -1.736 | 0.099 | 19.000 | 0.728 | 0.476 | 6.112 |
| -0.256 | 0.801 | 19.000 | 0.703 | 0.476 | 6.112 |
| -0.701 | 0.492 | 19.000 | 0.458 | 0.476 | 6.112 |
| -1.342 | 0.195 | 19.000 | 0.399 | 0.476 | 6.112 |
| -1.545 | 0.139 | 19.000 | 1.078 | 0.476 | 6.112 |
| -1.004 | 0.328 | 19.000 | 0.904 | 0.476 | 6.112 |
| -0.123 | 0.903 | 19.000 | 0.455 | 0.476 | 6.112 |
| 0.260  | 0.798 | 19.000 | 0.432 | 0.476 | 6.112 |
| -1.856 | 0.079 | 19.000 | 0.513 | 0.476 | 6.112 |
| -1.890 | 0.074 | 19.000 | 0.299 | 0.476 | 6.112 |
| -1.179 | 0.253 | 19.000 | 0.231 | 0.476 | 6.112 |
| -1.032 | 0.315 | 19.000 | 0.710 | 0.476 | 6.112 |
| 0.485  | 0.634 | 19.000 | 0.821 | 0.476 | 6.112 |
| -1.210 | 0.241 | 19.000 | 0.698 | 0.476 | 6.112 |
| -2.322 | 0.031 | 19.000 | 0.208 | 0.476 | 6.112 |
| -1.138 | 0.269 | 19.000 | 0.452 | 0.476 | 6.112 |
| 1.763  | 0.094 | 19.000 | 0.465 | 0.476 | 6.112 |
| -0.994 | 0.333 | 19.000 | 0.791 | 0.476 | 6.112 |
| -1.530 | 0.143 | 19.000 | 0.803 | 0.476 | 6.112 |
| -1.529 | 0.143 | 19.000 | 0.462 | 0.476 | 6.112 |
| 1.077  | 0.295 | 19.000 | 0.554 | 0.476 | 6.112 |
| -1.184 | 0.251 | 19.000 | 0.591 | 0.476 | 6.112 |
| -2.414 | 0.026 | 19.000 | 0.586 | 0.476 | 6.112 |
| -0.851 | 0.405 | 19.000 | 0.382 | 0.476 | 6.112 |
| 1.578  | 0.131 | 19.000 | 0.270 | 0.476 | 6.112 |
| -1.628 | 0.120 | 19.000 | 0.860 | 0.476 | 6.112 |
| 2.078  | 0.051 | 19.000 | 0.444 | 0.476 | 6.112 |
| -2.234 | 0.038 | 19.000 | 0.546 | 0.476 | 6.112 |
| -1.576 | 0.131 | 19.000 | 0.548 | 0.476 | 6.112 |
| -0.697 | 0.494 | 19.000 | 0.342 | 0.476 | 6.112 |
| 1.540  | 0.140 | 19.000 | 0.254 | 0.476 | 6.112 |



|        |       |        |       |       |       |
|--------|-------|--------|-------|-------|-------|
| 2.411  | 0.026 | 19.000 | 0.627 | 0.476 | 6.112 |
| -1.023 | 0.319 | 19.000 | 0.560 | 0.476 | 6.112 |
| 0.461  | 0.650 | 19.000 | 0.484 | 0.476 | 6.112 |
| -0.896 | 0.382 | 19.000 | 0.651 | 0.476 | 6.112 |
| 2.350  | 0.030 | 19.000 | 0.745 | 0.476 | 6.112 |
| 1.874  | 0.076 | 19.000 | 0.776 | 0.476 | 6.112 |
| 2.399  | 0.027 | 19.000 | 0.868 | 0.476 | 6.112 |
| 2.051  | 0.054 | 19.000 | 0.884 | 0.476 | 6.112 |
| -1.506 | 0.148 | 19.000 | 0.979 | 0.476 | 6.112 |
| -2.822 | 0.011 | 19.000 | 0.417 | 0.476 | 6.112 |
| 2.314  | 0.032 | 19.000 | 0.818 | 0.476 | 6.112 |
| -0.372 | 0.714 | 19.000 | 0.414 | 0.476 | 6.112 |
| 2.005  | 0.059 | 19.000 | 0.618 | 0.476 | 6.112 |
| 1.865  | 0.078 | 19.000 | 0.399 | 0.476 | 6.112 |
| 2.224  | 0.038 | 19.000 | 0.415 | 0.476 | 6.112 |
| 1.547  | 0.138 | 19.000 | 0.733 | 0.476 | 6.112 |
| 1.610  | 0.124 | 19.000 | 0.612 | 0.476 | 6.112 |
| 2.631  | 0.016 | 19.000 | 1.247 | 0.476 | 6.112 |
| 1.487  | 0.153 | 19.000 | 0.501 | 0.476 | 6.112 |
| 2.494  | 0.022 | 19.000 | 0.755 | 0.476 | 6.112 |
| -2.222 | 0.039 | 19.000 | 0.766 | 0.476 | 6.112 |
| 1.931  | 0.069 | 19.000 | 0.410 | 0.476 | 6.112 |
| 2.262  | 0.036 | 19.000 | 0.469 | 0.476 | 6.112 |
| -1.967 | 0.064 | 19.000 | 0.522 | 0.476 | 6.112 |
| 1.835  | 0.082 | 19.000 | 0.408 | 0.476 | 6.112 |
| 2.191  | 0.041 | 19.000 | 0.830 | 0.476 | 6.112 |
| 1.805  | 0.087 | 19.000 | 0.599 | 0.476 | 6.112 |
| -1.839 | 0.082 | 19.000 | 0.432 | 0.476 | 6.112 |
| 1.673  | 0.111 | 19.000 | 0.294 | 0.476 | 6.112 |
| 2.615  | 0.017 | 19.000 | 0.445 | 0.476 | 6.112 |
| 2.328  | 0.031 | 19.000 | 0.368 | 0.476 | 6.112 |
| 2.668  | 0.015 | 19.000 | 0.472 | 0.476 | 6.112 |
| 0.257  | 0.800 | 19.000 | 0.626 | 0.476 | 6.112 |
| -2.372 | 0.028 | 19.000 | 0.670 | 0.476 | 6.112 |
| 2.104  | 0.049 | 19.000 | 0.261 | 0.476 | 6.112 |
| -1.423 | 0.171 | 19.000 | 0.400 | 0.476 | 6.112 |
| -0.113 | 0.911 | 19.000 | 0.464 | 0.476 | 6.112 |
| 2.799  | 0.011 | 19.000 | 0.443 | 0.476 | 6.112 |
| 3.173  | 0.005 | 19.000 | 0.364 | 0.476 | 6.112 |
| -0.418 | 0.681 | 19.000 | 0.472 | 0.476 | 6.112 |
| 1.780  | 0.091 | 19.000 | 0.506 | 0.476 | 6.112 |
| 1.525  | 0.144 | 19.000 | 0.361 | 0.476 | 6.112 |
| 1.788  | 0.090 | 19.000 | 0.516 | 0.476 | 6.112 |
| -2.628 | 0.017 | 19.000 | 0.497 | 0.476 | 6.112 |
| -0.731 | 0.474 | 19.000 | 0.423 | 0.476 | 6.112 |
| 1.973  | 0.063 | 19.000 | 0.953 | 0.476 | 6.112 |
| 2.339  | 0.030 | 19.000 | 0.614 | 0.476 | 6.112 |
| 1.884  | 0.075 | 19.000 | 0.780 | 0.476 | 6.112 |
| -1.815 | 0.085 | 19.000 | 0.476 | 0.476 | 6.112 |
| 1.023  | 0.319 | 19.000 | 0.406 | 0.476 | 6.112 |

|        |       |        |       |       |       |
|--------|-------|--------|-------|-------|-------|
| 0.484  | 0.634 | 19.000 | 0.633 | 0.476 | 6.112 |
| -1.189 | 0.249 | 19.000 | 0.513 | 0.476 | 6.112 |
| -2.415 | 0.026 | 19.000 | 0.607 | 0.476 | 6.112 |
| 1.307  | 0.207 | 19.000 | 0.488 | 0.476 | 6.112 |
| -0.711 | 0.485 | 19.000 | 0.472 | 0.476 | 6.112 |
| 2.527  | 0.021 | 19.000 | 0.467 | 0.476 | 6.112 |
| 2.019  | 0.058 | 19.000 | 0.787 | 0.476 | 6.112 |
| 2.080  | 0.051 | 19.000 | 1.001 | 0.476 | 6.112 |
| 1.963  | 0.064 | 19.000 | 0.875 | 0.476 | 6.112 |
| 1.671  | 0.111 | 19.000 | 0.512 | 0.476 | 6.112 |
| 2.089  | 0.050 | 19.000 | 1.076 | 0.476 | 6.112 |
| 2.032  | 0.056 | 19.000 | 0.589 | 0.476 | 6.112 |
| -2.449 | 0.024 | 19.000 | 0.353 | 0.476 | 6.112 |
| -0.147 | 0.884 | 19.000 | 0.361 | 0.476 | 6.112 |
| 1.804  | 0.087 | 19.000 | 0.354 | 0.476 | 6.112 |
| 0.288  | 0.777 | 19.000 | 0.314 | 0.476 | 6.112 |
| 1.175  | 0.255 | 19.000 | 0.450 | 0.476 | 6.112 |
| -0.521 | 0.609 | 19.000 | 0.345 | 0.476 | 6.112 |
| 1.989  | 0.061 | 19.000 | 0.534 | 0.476 | 6.112 |
| 1.492  | 0.152 | 19.000 | 0.614 | 0.476 | 6.112 |
| -1.636 | 0.118 | 19.000 | 0.449 | 0.476 | 6.112 |
| 0.670  | 0.511 | 19.000 | 0.389 | 0.476 | 6.112 |
| 0.365  | 0.719 | 19.000 | 0.314 | 0.476 | 6.112 |
| -1.913 | 0.071 | 19.000 | 0.418 | 0.476 | 6.112 |
| -1.220 | 0.237 | 19.000 | 0.325 | 0.476 | 6.112 |
| -1.392 | 0.180 | 19.000 | 0.776 | 0.476 | 6.112 |
| 1.788  | 0.090 | 19.000 | 0.518 | 0.476 | 6.112 |
| -3.168 | 0.005 | 19.000 | 0.534 | 0.476 | 6.112 |
| 1.772  | 0.092 | 19.000 | 0.468 | 0.476 | 6.112 |
| 0.856  | 0.403 | 19.000 | 0.541 | 0.476 | 6.112 |
| 1.320  | 0.202 | 19.000 | 0.457 | 0.476 | 6.112 |
| -0.691 | 0.498 | 19.000 | 0.513 | 0.476 | 6.112 |
| -0.355 | 0.727 | 19.000 | 0.527 | 0.476 | 6.112 |
| -0.285 | 0.779 | 19.000 | 0.645 | 0.476 | 6.112 |
| 1.213  | 0.240 | 19.000 | 0.853 | 0.476 | 6.112 |
| 0.654  | 0.521 | 19.000 | 0.644 | 0.476 | 6.112 |
| 1.161  | 0.260 | 19.000 | 0.309 | 0.476 | 6.112 |
| -2.557 | 0.019 | 19.000 | 0.386 | 0.476 | 6.112 |
| -1.722 | 0.101 | 19.000 | 0.368 | 0.476 | 6.112 |
| -0.327 | 0.747 | 19.000 | 0.413 | 0.476 | 6.112 |
| 0.331  | 0.744 | 19.000 | 0.550 | 0.476 | 6.112 |
| -2.423 | 0.026 | 19.000 | 0.411 | 0.476 | 6.112 |
| 1.688  | 0.108 | 19.000 | 0.481 | 0.476 | 6.112 |
| 1.510  | 0.147 | 19.000 | 0.813 | 0.476 | 6.112 |
| 0.647  | 0.526 | 19.000 | 0.665 | 0.476 | 6.112 |
| -0.214 | 0.833 | 19.000 | 0.666 | 0.476 | 6.112 |
| -1.000 | 0.330 | 19.000 | 0.843 | 0.476 | 6.112 |
| 1.639  | 0.118 | 19.000 | 0.423 | 0.476 | 6.112 |
| 2.401  | 0.027 | 19.000 | 0.493 | 0.476 | 6.112 |
| -0.975 | 0.342 | 19.000 | 0.556 | 0.476 | 6.112 |

|        |       |        |       |       |       |
|--------|-------|--------|-------|-------|-------|
| 0.012  | 0.991 | 19.000 | 0.435 | 0.476 | 6.112 |
| 1.079  | 0.294 | 19.000 | 0.380 | 0.476 | 6.112 |
| -1.419 | 0.172 | 19.000 | 0.396 | 0.476 | 6.112 |
| 2.441  | 0.025 | 19.000 | 0.623 | 0.476 | 6.112 |
| 2.105  | 0.049 | 19.000 | 1.212 | 0.476 | 6.112 |
| -2.390 | 0.027 | 19.000 | 0.547 | 0.476 | 6.112 |
| -1.910 | 0.071 | 19.000 | 0.535 | 0.476 | 6.112 |
| 0.087  | 0.932 | 19.000 | 0.532 | 0.476 | 6.112 |
| -0.084 | 0.934 | 19.000 | 0.541 | 0.476 | 6.112 |
| 1.952  | 0.066 | 19.000 | 1.089 | 0.476 | 6.112 |
| 1.728  | 0.100 | 19.000 | 0.921 | 0.476 | 6.112 |
| 1.380  | 0.183 | 19.000 | 1.429 | 0.476 | 6.112 |
| -1.029 | 0.316 | 19.000 | 1.304 | 0.476 | 6.112 |
| 0.893  | 0.383 | 19.000 | 0.298 | 0.476 | 6.112 |
| 0.999  | 0.331 | 19.000 | 0.563 | 0.476 | 6.112 |
| -1.951 | 0.066 | 19.000 | 0.433 | 0.476 | 6.112 |
| 2.847  | 0.010 | 19.000 | 0.417 | 0.476 | 6.112 |
| -0.232 | 0.819 | 19.000 | 0.373 | 0.476 | 6.112 |
| 2.006  | 0.059 | 19.000 | 0.334 | 0.476 | 6.112 |
| 2.472  | 0.023 | 19.000 | 0.503 | 0.476 | 6.112 |
| 3.286  | 0.004 | 19.000 | 0.721 | 0.476 | 6.112 |
| -1.699 | 0.106 | 19.000 | 0.581 | 0.476 | 6.112 |
| 2.642  | 0.016 | 19.000 | 0.358 | 0.476 | 6.112 |
| -1.015 | 0.323 | 19.000 | 0.446 | 0.476 | 6.112 |
| 2.098  | 0.049 | 19.000 | 0.543 | 0.476 | 6.112 |
| 2.315  | 0.032 | 19.000 | 0.916 | 0.476 | 6.112 |
| 2.340  | 0.030 | 19.000 | 0.828 | 0.476 | 6.112 |
| -0.326 | 0.748 | 19.000 | 0.705 | 0.476 | 6.112 |
| 2.747  | 0.013 | 19.000 | 0.811 | 0.476 | 6.112 |
| 1.557  | 0.136 | 19.000 | 0.608 | 0.476 | 6.112 |
| 0.178  | 0.861 | 19.000 | 1.551 | 0.476 | 6.112 |
| 0.983  | 0.338 | 19.000 | 0.555 | 0.476 | 6.112 |
| 1.678  | 0.110 | 19.000 | 0.445 | 0.476 | 6.112 |
| 0.272  | 0.789 | 19.000 | 0.382 | 0.476 | 6.112 |
| 0.172  | 0.865 | 19.000 | 0.683 | 0.476 | 6.112 |
| 1.649  | 0.116 | 19.000 | 0.652 | 0.476 | 6.112 |
| 1.959  | 0.065 | 19.000 | 0.638 | 0.476 | 6.112 |
| 0.712  | 0.485 | 19.000 | 0.330 | 0.476 | 6.112 |
| -1.813 | 0.086 | 19.000 | 0.373 | 0.476 | 6.112 |
| 2.558  | 0.019 | 19.000 | 0.396 | 0.476 | 6.112 |
| -1.688 | 0.108 | 19.000 | 0.667 | 0.476 | 6.112 |
| -0.450 | 0.658 | 19.000 | 0.691 | 0.476 | 6.112 |
| -1.325 | 0.201 | 19.000 | 0.618 | 0.476 | 6.112 |
| 2.364  | 0.029 | 19.000 | 0.696 | 0.476 | 6.112 |
| -1.984 | 0.062 | 19.000 | 0.566 | 0.476 | 6.112 |
| 1.077  | 0.295 | 19.000 | 0.458 | 0.476 | 6.112 |
| -0.605 | 0.552 | 19.000 | 0.353 | 0.476 | 6.112 |
| 2.424  | 0.026 | 19.000 | 0.368 | 0.476 | 6.112 |
| -1.290 | 0.213 | 19.000 | 0.421 | 0.476 | 6.112 |
| 1.347  | 0.194 | 19.000 | 0.454 | 0.476 | 6.112 |

|        |       |        |       |       |       |
|--------|-------|--------|-------|-------|-------|
| -2.145 | 0.045 | 19.000 | 0.626 | 0.476 | 6.112 |
| -1.910 | 0.071 | 19.000 | 0.540 | 0.476 | 6.112 |
| 2.186  | 0.042 | 19.000 | 0.457 | 0.476 | 6.112 |
| 0.389  | 0.702 | 19.000 | 0.471 | 0.476 | 6.112 |
| 1.384  | 0.183 | 19.000 | 0.287 | 0.476 | 6.112 |
| 2.195  | 0.041 | 19.000 | 0.398 | 0.476 | 6.112 |
| 0.449  | 0.658 | 19.000 | 0.549 | 0.476 | 6.112 |
| 2.107  | 0.049 | 19.000 | 0.652 | 0.476 | 6.112 |
| 1.032  | 0.315 | 19.000 | 0.441 | 0.476 | 6.112 |
| 1.847  | 0.080 | 19.000 | 0.723 | 0.476 | 6.112 |
| 1.928  | 0.069 | 19.000 | 0.446 | 0.476 | 6.112 |
| 1.720  | 0.102 | 19.000 | 0.513 | 0.476 | 6.112 |
| 1.539  | 0.140 | 19.000 | 1.214 | 0.476 | 6.112 |
| -2.093 | 0.050 | 19.000 | 0.464 | 0.476 | 6.112 |
| -1.839 | 0.082 | 19.000 | 0.967 | 0.476 | 6.112 |
| 1.085  | 0.292 | 19.000 | 0.372 | 0.476 | 6.112 |
| -2.182 | 0.042 | 19.000 | 0.563 | 0.476 | 6.112 |
| -0.095 | 0.925 | 19.000 | 0.230 | 0.476 | 6.112 |
| 2.309  | 0.032 | 19.000 | 0.488 | 0.476 | 6.112 |
| -2.208 | 0.040 | 19.000 | 0.795 | 0.476 | 6.112 |
| -2.252 | 0.036 | 19.000 | 0.384 | 0.476 | 6.112 |
| 4.365  | 0.000 | 19.000 | 0.344 | 0.476 | 6.112 |
| 0.559  | 0.583 | 19.000 | 0.473 | 0.476 | 6.112 |
| -0.182 | 0.858 | 19.000 | 0.370 | 0.476 | 6.112 |
| -2.290 | 0.034 | 19.000 | 0.413 | 0.476 | 6.112 |
| -2.787 | 0.012 | 19.000 | 0.582 | 0.476 | 6.112 |
| -0.603 | 0.553 | 19.000 | 0.632 | 0.476 | 6.112 |
| -0.843 | 0.410 | 19.000 | 0.571 | 0.476 | 6.112 |
| 0.167  | 0.869 | 19.000 | 0.647 | 0.476 | 6.112 |
| 0.401  | 0.693 | 19.000 | 0.385 | 0.476 | 6.112 |
| 2.114  | 0.048 | 19.000 | 0.774 | 0.476 | 6.112 |
| 0.400  | 0.694 | 19.000 | 0.401 | 0.476 | 6.112 |
| -1.297 | 0.210 | 19.000 | 0.968 | 0.476 | 6.112 |
| -0.687 | 0.500 | 19.000 | 0.813 | 0.476 | 6.112 |
| -2.964 | 0.008 | 19.000 | 0.569 | 0.476 | 6.112 |
| 1.618  | 0.122 | 19.000 | 0.601 | 0.476 | 6.112 |
| 0.117  | 0.908 | 19.000 | 0.377 | 0.476 | 6.112 |
| 0.056  | 0.956 | 19.000 | 0.397 | 0.476 | 6.112 |
| 0.021  | 0.983 | 19.000 | 0.383 | 0.476 | 6.112 |
| -0.855 | 0.403 | 19.000 | 0.284 | 0.476 | 6.112 |
| -0.826 | 0.419 | 19.000 | 0.296 | 0.476 | 6.112 |
| 2.116  | 0.048 | 19.000 | 0.724 | 0.476 | 6.112 |
| 1.031  | 0.315 | 19.000 | 0.329 | 0.476 | 6.112 |
| -0.669 | 0.511 | 19.000 | 0.550 | 0.476 | 6.112 |
| -1.580 | 0.131 | 19.000 | 0.607 | 0.476 | 6.112 |
| -1.584 | 0.130 | 19.000 | 0.660 | 0.476 | 6.112 |
| 0.092  | 0.928 | 19.000 | 0.615 | 0.476 | 6.112 |
| -2.707 | 0.014 | 19.000 | 0.359 | 0.476 | 6.112 |
| -0.889 | 0.385 | 19.000 | 0.439 | 0.476 | 6.112 |
| -0.899 | 0.380 | 19.000 | 0.384 | 0.476 | 6.112 |

|        |       |        |       |       |       |
|--------|-------|--------|-------|-------|-------|
| 1.733  | 0.099 | 19.000 | 0.321 | 0.476 | 6.112 |
| 2.844  | 0.010 | 19.000 | 0.354 | 0.476 | 6.112 |
| 2.220  | 0.039 | 19.000 | 1.044 | 0.476 | 6.112 |
| 1.803  | 0.087 | 19.000 | 0.879 | 0.476 | 6.112 |
| 1.943  | 0.067 | 19.000 | 0.363 | 0.476 | 6.112 |
| -1.398 | 0.178 | 19.000 | 0.436 | 0.476 | 6.112 |
| 1.363  | 0.189 | 19.000 | 0.639 | 0.476 | 6.112 |
| 1.731  | 0.100 | 19.000 | 0.729 | 0.476 | 6.112 |
| 2.263  | 0.036 | 19.000 | 0.960 | 0.476 | 6.112 |
| 2.200  | 0.040 | 19.000 | 1.017 | 0.476 | 6.112 |
| 1.749  | 0.096 | 19.000 | 0.430 | 0.476 | 6.112 |
| 1.895  | 0.073 | 19.000 | 0.344 | 0.476 | 6.112 |
| -1.486 | 0.154 | 19.000 | 0.522 | 0.476 | 6.112 |
| -1.002 | 0.329 | 19.000 | 0.441 | 0.476 | 6.112 |
| -2.445 | 0.024 | 19.000 | 0.951 | 0.476 | 6.112 |
| -0.640 | 0.529 | 19.000 | 0.632 | 0.476 | 6.112 |
| -1.317 | 0.204 | 19.000 | 0.329 | 0.476 | 6.112 |
| -1.548 | 0.138 | 19.000 | 0.868 | 0.476 | 6.112 |
| 1.109  | 0.281 | 19.000 | 0.347 | 0.476 | 6.112 |
| -1.372 | 0.186 | 19.000 | 0.760 | 0.476 | 6.112 |
| 1.490  | 0.153 | 19.000 | 0.623 | 0.476 | 6.112 |
| 2.457  | 0.024 | 19.000 | 0.596 | 0.476 | 6.112 |
| 1.803  | 0.087 | 19.000 | 0.349 | 0.476 | 6.112 |
| 2.581  | 0.018 | 19.000 | 0.810 | 0.476 | 6.112 |
| -1.316 | 0.204 | 19.000 | 0.571 | 0.476 | 6.112 |
| 1.602  | 0.126 | 19.000 | 0.691 | 0.476 | 6.112 |
| -1.606 | 0.125 | 19.000 | 0.614 | 0.476 | 6.112 |
| 0.942  | 0.358 | 19.000 | 0.464 | 0.476 | 6.112 |
| 2.046  | 0.055 | 19.000 | 0.795 | 0.476 | 6.112 |
| -2.091 | 0.050 | 19.000 | 0.747 | 0.476 | 6.112 |
| -1.884 | 0.075 | 19.000 | 0.647 | 0.476 | 6.112 |
| 1.103  | 0.284 | 19.000 | 1.031 | 0.476 | 6.112 |
| 1.087  | 0.291 | 19.000 | 1.085 | 0.476 | 6.112 |
| 2.591  | 0.018 | 19.000 | 0.342 | 0.476 | 6.112 |
| 2.367  | 0.029 | 19.000 | 0.486 | 0.476 | 6.112 |
| -0.626 | 0.539 | 19.000 | 0.461 | 0.476 | 6.112 |
| -2.527 | 0.021 | 19.000 | 0.684 | 0.476 | 6.112 |
| 1.691  | 0.107 | 19.000 | 0.625 | 0.476 | 6.112 |
| 2.435  | 0.025 | 19.000 | 0.839 | 0.476 | 6.112 |
| 2.297  | 0.033 | 19.000 | 0.740 | 0.476 | 6.112 |
| 2.766  | 0.012 | 19.000 | 0.570 | 0.476 | 6.112 |
| 2.223  | 0.039 | 19.000 | 0.578 | 0.476 | 6.112 |
| 1.842  | 0.081 | 19.000 | 0.737 | 0.476 | 6.112 |
| 2.559  | 0.019 | 19.000 | 0.326 | 0.476 | 6.112 |
| -2.511 | 0.021 | 19.000 | 0.625 | 0.476 | 6.112 |
| 2.095  | 0.050 | 19.000 | 0.767 | 0.476 | 6.112 |
| 1.981  | 0.062 | 19.000 | 0.492 | 0.476 | 6.112 |
| 1.609  | 0.124 | 19.000 | 0.336 | 0.476 | 6.112 |
| 1.353  | 0.192 | 19.000 | 0.571 | 0.476 | 6.112 |
| 1.978  | 0.063 | 19.000 | 0.389 | 0.476 | 6.112 |

|        |       |        |       |       |       |
|--------|-------|--------|-------|-------|-------|
| 1.133  | 0.271 | 19.000 | 0.298 | 0.476 | 6.112 |
| 1.381  | 0.183 | 19.000 | 0.391 | 0.476 | 6.112 |
| 2.516  | 0.021 | 19.000 | 0.571 | 0.476 | 6.112 |
| -0.487 | 0.632 | 19.000 | 0.762 | 0.476 | 6.112 |
| 0.246  | 0.809 | 19.000 | 0.374 | 0.476 | 6.112 |
| -2.266 | 0.035 | 19.000 | 0.486 | 0.476 | 6.112 |
| -1.022 | 0.320 | 19.000 | 0.518 | 0.476 | 6.112 |
| 4.365  | 0.000 | 19.000 | 0.378 | 0.476 | 6.112 |
| -0.504 | 0.620 | 19.000 | 0.375 | 0.476 | 6.112 |
| 1.678  | 0.110 | 19.000 | 0.554 | 0.476 | 6.112 |
| 2.601  | 0.018 | 19.000 | 0.469 | 0.476 | 6.112 |
| -0.401 | 0.693 | 19.000 | 0.576 | 0.476 | 6.112 |
| 2.037  | 0.056 | 19.000 | 0.507 | 0.476 | 6.112 |
| 0.161  | 0.874 | 19.000 | 0.304 | 0.476 | 6.112 |
| 0.364  | 0.720 | 19.000 | 0.570 | 0.476 | 6.112 |
| 1.653  | 0.115 | 19.000 | 0.526 | 0.476 | 6.112 |
| 1.158  | 0.261 | 19.000 | 0.651 | 0.476 | 6.112 |
| 1.633  | 0.119 | 19.000 | 0.518 | 0.476 | 6.112 |
| 0.380  | 0.708 | 19.000 | 0.439 | 0.476 | 6.112 |
| 1.217  | 0.238 | 19.000 | 0.251 | 0.476 | 6.112 |
| -1.651 | 0.115 | 19.000 | 0.841 | 0.476 | 6.112 |
| 3.394  | 0.003 | 19.000 | 0.745 | 0.476 | 6.112 |
| 1.320  | 0.203 | 19.000 | 0.446 | 0.476 | 6.112 |
| 0.713  | 0.485 | 19.000 | 0.408 | 0.476 | 6.112 |
| -0.796 | 0.436 | 19.000 | 0.455 | 0.476 | 6.112 |
| -1.493 | 0.152 | 19.000 | 0.475 | 0.476 | 6.112 |
| -0.784 | 0.443 | 19.000 | 0.453 | 0.476 | 6.112 |
| -1.091 | 0.289 | 19.000 | 0.438 | 0.476 | 6.112 |
| -1.170 | 0.256 | 19.000 | 0.419 | 0.476 | 6.112 |
| 1.711  | 0.103 | 19.000 | 0.587 | 0.476 | 6.112 |
| -0.212 | 0.835 | 19.000 | 0.375 | 0.476 | 6.112 |
| 0.999  | 0.330 | 19.000 | 0.504 | 0.476 | 6.112 |
| 1.409  | 0.175 | 19.000 | 0.268 | 0.476 | 6.112 |
| -2.999 | 0.007 | 19.000 | 0.298 | 0.476 | 6.112 |
| 1.040  | 0.311 | 19.000 | 0.407 | 0.476 | 6.112 |
| 2.383  | 0.028 | 19.000 | 0.268 | 0.476 | 6.112 |
| -0.730 | 0.474 | 19.000 | 0.454 | 0.476 | 6.112 |
| 1.518  | 0.146 | 19.000 | 0.375 | 0.476 | 6.112 |
| 2.041  | 0.055 | 19.000 | 0.375 | 0.476 | 6.112 |
| -0.165 | 0.870 | 19.000 | 0.718 | 0.476 | 6.112 |
| 0.805  | 0.431 | 19.000 | 0.819 | 0.476 | 6.112 |
| 2.211  | 0.040 | 19.000 | 0.556 | 0.476 | 6.112 |
| -1.907 | 0.072 | 19.000 | 0.392 | 0.476 | 6.112 |
| 1.521  | 0.145 | 19.000 | 0.225 | 0.476 | 6.112 |
| 1.932  | 0.068 | 19.000 | 0.326 | 0.476 | 6.112 |
| 1.674  | 0.111 | 19.000 | 0.377 | 0.476 | 6.112 |
| -0.170 | 0.867 | 19.000 | 0.423 | 0.476 | 6.112 |
| 1.599  | 0.126 | 19.000 | 0.615 | 0.476 | 6.112 |
| -0.497 | 0.625 | 19.000 | 0.945 | 0.476 | 6.112 |
| -1.803 | 0.087 | 19.000 | 0.709 | 0.476 | 6.112 |

|        |       |        |       |       |       |
|--------|-------|--------|-------|-------|-------|
| -1.905 | 0.072 | 19.000 | 1.140 | 0.476 | 6.112 |
| -1.107 | 0.282 | 19.000 | 0.796 | 0.476 | 6.112 |
| -2.464 | 0.023 | 19.000 | 0.386 | 0.476 | 6.112 |
| 2.090  | 0.050 | 19.000 | 0.635 | 0.476 | 6.112 |
| -0.113 | 0.911 | 19.000 | 0.421 | 0.476 | 6.112 |
| 1.936  | 0.068 | 19.000 | 0.676 | 0.476 | 6.112 |
| 1.291  | 0.212 | 19.000 | 0.782 | 0.476 | 6.112 |
| 1.037  | 0.313 | 19.000 | 0.535 | 0.476 | 6.112 |
| 0.401  | 0.693 | 19.000 | 0.515 | 0.476 | 6.112 |
| -1.669 | 0.111 | 19.000 | 0.705 | 0.476 | 6.112 |
| -3.922 | 0.001 | 19.000 | 0.440 | 0.476 | 6.112 |
| 2.501  | 0.022 | 19.000 | 1.168 | 0.476 | 6.112 |
| 2.189  | 0.041 | 19.000 | 0.812 | 0.476 | 6.112 |
| 2.511  | 0.021 | 19.000 | 0.482 | 0.476 | 6.112 |
| 3.293  | 0.004 | 19.000 | 0.447 | 0.476 | 6.112 |
| 1.249  | 0.227 | 19.000 | 0.718 | 0.476 | 6.112 |
| 1.333  | 0.198 | 19.000 | 0.417 | 0.476 | 6.112 |
| -2.765 | 0.012 | 19.000 | 0.566 | 0.476 | 6.112 |
| 0.589  | 0.563 | 19.000 | 0.610 | 0.476 | 6.112 |
| -1.852 | 0.080 | 19.000 | 0.587 | 0.476 | 6.112 |
| -2.961 | 0.008 | 19.000 | 0.386 | 0.476 | 6.112 |
| -1.562 | 0.135 | 19.000 | 0.827 | 0.476 | 6.112 |
| 0.938  | 0.360 | 19.000 | 0.377 | 0.476 | 6.112 |
| -1.576 | 0.132 | 19.000 | 0.507 | 0.476 | 6.112 |
| -0.466 | 0.647 | 19.000 | 0.635 | 0.476 | 6.112 |
| 0.237  | 0.815 | 19.000 | 0.568 | 0.476 | 6.112 |
| -3.046 | 0.007 | 19.000 | 0.671 | 0.476 | 6.112 |
| -0.160 | 0.874 | 19.000 | 0.684 | 0.476 | 6.112 |
| -0.304 | 0.765 | 19.000 | 0.784 | 0.476 | 6.112 |
| 2.489  | 0.022 | 19.000 | 0.485 | 0.476 | 6.112 |
| -3.483 | 0.002 | 19.000 | 0.374 | 0.476 | 6.112 |
| -0.862 | 0.399 | 19.000 | 0.263 | 0.476 | 6.112 |
| -3.261 | 0.004 | 19.000 | 0.317 | 0.476 | 6.112 |
| 1.892  | 0.074 | 19.000 | 0.457 | 0.476 | 6.112 |
| 0.165  | 0.871 | 19.000 | 0.386 | 0.476 | 6.112 |
| -1.440 | 0.166 | 19.000 | 0.583 | 0.476 | 6.112 |
| 0.771  | 0.450 | 19.000 | 0.395 | 0.476 | 6.112 |
| 2.479  | 0.023 | 19.000 | 1.371 | 0.476 | 6.112 |
| -0.293 | 0.773 | 19.000 | 0.300 | 0.476 | 6.112 |
| -1.405 | 0.176 | 19.000 | 0.757 | 0.476 | 6.112 |
| 0.097  | 0.924 | 19.000 | 0.562 | 0.476 | 6.112 |
| 0.724  | 0.478 | 19.000 | 0.370 | 0.476 | 6.112 |
| 1.455  | 0.162 | 19.000 | 0.484 | 0.476 | 6.112 |
| 0.513  | 0.614 | 19.000 | 0.391 | 0.476 | 6.112 |
| -0.641 | 0.529 | 19.000 | 0.738 | 0.476 | 6.112 |
| 0.052  | 0.959 | 19.000 | 0.556 | 0.476 | 6.112 |
| 1.039  | 0.312 | 19.000 | 0.707 | 0.476 | 6.112 |
| 2.152  | 0.044 | 19.000 | 0.437 | 0.476 | 6.112 |
| -2.111 | 0.048 | 19.000 | 0.921 | 0.476 | 6.112 |
| -0.901 | 0.379 | 19.000 | 0.462 | 0.476 | 6.112 |

|        |       |        |       |       |       |
|--------|-------|--------|-------|-------|-------|
| 2.443  | 0.024 | 19.000 | 0.326 | 0.476 | 6.112 |
| 1.573  | 0.132 | 19.000 | 0.332 | 0.476 | 6.112 |
| -0.940 | 0.359 | 19.000 | 0.261 | 0.476 | 6.112 |
| 1.652  | 0.115 | 19.000 | 0.543 | 0.476 | 6.112 |
| -2.893 | 0.009 | 19.000 | 0.401 | 0.476 | 6.112 |
| 1.678  | 0.110 | 19.000 | 0.403 | 0.476 | 6.112 |
| -3.615 | 0.002 | 19.000 | 0.452 | 0.476 | 6.112 |
| 0.942  | 0.358 | 19.000 | 0.747 | 0.476 | 6.112 |
| -2.571 | 0.019 | 19.000 | 0.515 | 0.476 | 6.112 |
| -1.213 | 0.240 | 19.000 | 0.377 | 0.476 | 6.112 |
| -1.021 | 0.320 | 19.000 | 0.482 | 0.476 | 6.112 |
| 2.815  | 0.011 | 19.000 | 1.330 | 0.476 | 6.112 |
| -1.439 | 0.167 | 19.000 | 0.385 | 0.476 | 6.112 |
| 0.410  | 0.687 | 19.000 | 0.507 | 0.476 | 6.112 |
| -2.631 | 0.016 | 19.000 | 0.408 | 0.476 | 6.112 |
| -1.944 | 0.067 | 19.000 | 0.614 | 0.476 | 6.112 |
| -2.655 | 0.016 | 19.000 | 0.629 | 0.476 | 6.112 |
| -1.901 | 0.073 | 19.000 | 0.565 | 0.476 | 6.112 |
| -0.294 | 0.772 | 19.000 | 0.983 | 0.476 | 6.112 |
| -1.085 | 0.291 | 19.000 | 0.651 | 0.476 | 6.112 |
| 2.411  | 0.026 | 19.000 | 0.666 | 0.476 | 6.112 |
| 1.720  | 0.102 | 19.000 | 0.659 | 0.476 | 6.112 |
| -0.176 | 0.862 | 19.000 | 0.523 | 0.476 | 6.112 |
| 0.492  | 0.628 | 19.000 | 0.591 | 0.476 | 6.112 |
| -0.683 | 0.503 | 19.000 | 0.387 | 0.476 | 6.112 |
| 1.740  | 0.098 | 19.000 | 0.373 | 0.476 | 6.112 |
| 2.323  | 0.031 | 19.000 | 0.412 | 0.476 | 6.112 |
| 0.887  | 0.386 | 19.000 | 0.462 | 0.476 | 6.112 |
| 0.879  | 0.390 | 19.000 | 0.249 | 0.476 | 6.112 |
| 2.489  | 0.022 | 19.000 | 0.708 | 0.476 | 6.112 |
| 2.549  | 0.020 | 19.000 | 0.287 | 0.476 | 6.112 |
| 1.694  | 0.107 | 19.000 | 0.456 | 0.476 | 6.112 |
| -0.197 | 0.846 | 19.000 | 0.653 | 0.476 | 6.112 |
| 1.586  | 0.129 | 19.000 | 0.301 | 0.476 | 6.112 |
| -0.257 | 0.800 | 19.000 | 0.625 | 0.476 | 6.112 |
| -2.098 | 0.050 | 19.000 | 0.402 | 0.476 | 6.112 |
| 0.308  | 0.761 | 19.000 | 0.460 | 0.476 | 6.112 |
| -0.745 | 0.466 | 19.000 | 0.513 | 0.476 | 6.112 |
| -0.821 | 0.422 | 19.000 | 0.282 | 0.476 | 6.112 |
| -1.767 | 0.093 | 19.000 | 0.579 | 0.476 | 6.112 |
| -1.294 | 0.211 | 19.000 | 0.506 | 0.476 | 6.112 |
| -2.195 | 0.041 | 19.000 | 0.354 | 0.476 | 6.112 |
| -2.410 | 0.026 | 19.000 | 0.388 | 0.476 | 6.112 |
| 2.753  | 0.013 | 19.000 | 0.795 | 0.476 | 6.112 |
| -0.316 | 0.756 | 19.000 | 0.696 | 0.476 | 6.112 |
| 2.982  | 0.008 | 19.000 | 0.618 | 0.476 | 6.112 |
| -1.552 | 0.137 | 19.000 | 0.343 | 0.476 | 6.112 |
| -0.640 | 0.530 | 19.000 | 0.503 | 0.476 | 6.112 |
| 0.957  | 0.351 | 19.000 | 0.544 | 0.476 | 6.112 |
| 2.940  | 0.008 | 19.000 | 0.371 | 0.476 | 6.112 |



|        |       |        |       |       |       |
|--------|-------|--------|-------|-------|-------|
| -1.598 | 0.127 | 19.000 | 0.502 | 0.476 | 6.112 |
| -0.150 | 0.883 | 19.000 | 0.438 | 0.476 | 6.112 |
| 1.903  | 0.072 | 19.000 | 0.518 | 0.476 | 6.112 |
| 0.441  | 0.664 | 19.000 | 0.601 | 0.476 | 6.112 |
| -2.436 | 0.025 | 19.000 | 0.623 | 0.476 | 6.112 |
| 3.356  | 0.003 | 19.000 | 0.482 | 0.476 | 6.112 |
| 0.803  | 0.432 | 19.000 | 0.562 | 0.476 | 6.112 |
| 0.857  | 0.402 | 19.000 | 0.541 | 0.476 | 6.112 |
| 1.778  | 0.091 | 19.000 | 0.809 | 0.476 | 6.112 |
| 1.851  | 0.080 | 19.000 | 0.531 | 0.476 | 6.112 |
| 1.795  | 0.089 | 19.000 | 0.422 | 0.476 | 6.112 |
| 1.757  | 0.095 | 19.000 | 0.458 | 0.476 | 6.112 |
| -1.847 | 0.080 | 19.000 | 0.590 | 0.476 | 6.112 |
| 0.553  | 0.587 | 19.000 | 0.718 | 0.476 | 6.112 |
| -2.651 | 0.016 | 19.000 | 0.665 | 0.476 | 6.112 |
| 0.675  | 0.508 | 19.000 | 0.533 | 0.476 | 6.112 |
| 0.766  | 0.453 | 19.000 | 0.643 | 0.476 | 6.112 |
| -0.925 | 0.367 | 19.000 | 0.584 | 0.476 | 6.112 |
| -1.449 | 0.164 | 19.000 | 0.610 | 0.476 | 6.112 |
| -0.568 | 0.577 | 19.000 | 0.489 | 0.476 | 6.112 |
| -1.624 | 0.121 | 19.000 | 1.046 | 0.476 | 6.112 |
| 3.920  | 0.001 | 19.000 | 0.446 | 0.476 | 6.112 |
| 2.228  | 0.038 | 19.000 | 0.315 | 0.476 | 6.112 |
| -0.197 | 0.846 | 19.000 | 0.501 | 0.476 | 6.112 |
| 0.252  | 0.804 | 19.000 | 0.467 | 0.476 | 6.112 |
| -0.732 | 0.473 | 19.000 | 0.427 | 0.476 | 6.112 |
| 0.303  | 0.765 | 19.000 | 0.431 | 0.476 | 6.112 |
| 2.168  | 0.043 | 19.000 | 0.558 | 0.476 | 6.112 |
| 3.541  | 0.002 | 19.000 | 0.484 | 0.476 | 6.112 |
| 2.363  | 0.029 | 19.000 | 0.810 | 0.476 | 6.112 |
| 3.186  | 0.005 | 19.000 | 0.336 | 0.476 | 6.112 |
| 1.582  | 0.130 | 19.000 | 0.361 | 0.476 | 6.112 |
| -1.211 | 0.241 | 19.000 | 0.458 | 0.476 | 6.112 |
| 2.758  | 0.013 | 19.000 | 0.386 | 0.476 | 6.112 |
| 1.150  | 0.264 | 19.000 | 0.432 | 0.476 | 6.112 |
| 1.192  | 0.248 | 19.000 | 0.548 | 0.476 | 6.112 |
| -1.011 | 0.325 | 19.000 | 0.602 | 0.476 | 6.112 |
| -0.799 | 0.434 | 19.000 | 0.488 | 0.476 | 6.112 |
| 1.761  | 0.094 | 19.000 | 0.359 | 0.476 | 6.112 |
| 2.180  | 0.042 | 19.000 | 0.363 | 0.476 | 6.112 |
| -0.315 | 0.756 | 19.000 | 0.401 | 0.476 | 6.112 |
| -1.799 | 0.088 | 19.000 | 0.484 | 0.476 | 6.112 |
| 0.510  | 0.616 | 19.000 | 0.372 | 0.476 | 6.112 |
| -0.749 | 0.463 | 19.000 | 0.515 | 0.476 | 6.112 |
| 0.305  | 0.763 | 19.000 | 0.441 | 0.476 | 6.112 |
| 0.469  | 0.644 | 19.000 | 0.449 | 0.476 | 6.112 |
| -1.988 | 0.061 | 19.000 | 0.338 | 0.476 | 6.112 |
| -0.014 | 0.989 | 19.000 | 0.434 | 0.476 | 6.112 |
| -0.075 | 0.941 | 19.000 | 0.686 | 0.476 | 6.112 |
| 1.813  | 0.086 | 19.000 | 0.352 | 0.476 | 6.112 |

|        |       |        |       |       |       |
|--------|-------|--------|-------|-------|-------|
| 1.096  | 0.287 | 19.000 | 0.386 | 0.476 | 6.112 |
| -2.263 | 0.036 | 19.000 | 0.337 | 0.476 | 6.112 |
| 3.299  | 0.004 | 19.000 | 0.430 | 0.476 | 6.112 |
| -2.437 | 0.025 | 19.000 | 0.960 | 0.476 | 6.112 |
| 1.197  | 0.246 | 19.000 | 0.575 | 0.476 | 6.112 |
| -2.301 | 0.033 | 19.000 | 0.368 | 0.476 | 6.112 |
| -1.328 | 0.200 | 19.000 | 0.402 | 0.476 | 6.112 |
| 0.218  | 0.830 | 19.000 | 0.702 | 0.476 | 6.112 |
| 1.332  | 0.199 | 19.000 | 0.445 | 0.476 | 6.112 |
| 0.848  | 0.407 | 19.000 | 0.438 | 0.476 | 6.112 |
| -0.497 | 0.625 | 19.000 | 0.352 | 0.476 | 6.112 |
| 0.656  | 0.519 | 19.000 | 0.453 | 0.476 | 6.112 |
| -1.333 | 0.198 | 19.000 | 0.626 | 0.476 | 6.112 |
| -1.340 | 0.196 | 19.000 | 0.460 | 0.476 | 6.112 |
| -0.838 | 0.413 | 19.000 | 0.497 | 0.476 | 6.112 |
| -0.618 | 0.544 | 19.000 | 0.430 | 0.476 | 6.112 |
| 2.245  | 0.037 | 19.000 | 0.802 | 0.476 | 6.112 |
| 1.394  | 0.180 | 19.000 | 0.779 | 0.476 | 6.112 |
| 2.443  | 0.025 | 19.000 | 1.092 | 0.476 | 6.112 |
| -1.867 | 0.077 | 19.000 | 0.542 | 0.476 | 6.112 |
| -1.172 | 0.256 | 19.000 | 0.511 | 0.476 | 6.112 |
| 1.176  | 0.254 | 19.000 | 0.299 | 0.476 | 6.112 |
| 1.778  | 0.091 | 19.000 | 0.872 | 0.476 | 6.112 |
| 2.444  | 0.024 | 19.000 | 0.265 | 0.476 | 6.112 |
| 0.458  | 0.652 | 19.000 | 0.422 | 0.476 | 6.112 |
| 1.841  | 0.081 | 19.000 | 0.633 | 0.476 | 6.112 |
| -1.783 | 0.091 | 19.000 | 1.031 | 0.476 | 6.112 |
| -0.946 | 0.356 | 19.000 | 1.007 | 0.476 | 6.112 |
| -0.655 | 0.521 | 19.000 | 0.649 | 0.476 | 6.112 |
| 0.244  | 0.810 | 19.000 | 0.451 | 0.476 | 6.112 |
| 2.268  | 0.035 | 19.000 | 1.342 | 0.476 | 6.112 |
| -0.600 | 0.556 | 19.000 | 0.592 | 0.476 | 6.112 |
| 0.079  | 0.938 | 19.000 | 0.656 | 0.476 | 6.112 |
| 0.244  | 0.810 | 19.000 | 0.469 | 0.476 | 6.112 |
| -0.229 | 0.821 | 19.000 | 0.693 | 0.476 | 6.112 |
| 0.726  | 0.477 | 19.000 | 0.734 | 0.476 | 6.112 |
| -1.862 | 0.078 | 19.000 | 0.678 | 0.476 | 6.112 |
| 0.269  | 0.791 | 19.000 | 0.566 | 0.476 | 6.112 |
| -1.348 | 0.193 | 19.000 | 0.602 | 0.476 | 6.112 |
| -1.769 | 0.093 | 19.000 | 0.991 | 0.476 | 6.112 |
| -1.739 | 0.098 | 19.000 | 0.505 | 0.476 | 6.112 |
| 0.057  | 0.955 | 19.000 | 0.497 | 0.476 | 6.112 |
| 2.290  | 0.034 | 19.000 | 0.565 | 0.476 | 6.112 |
| -0.892 | 0.383 | 19.000 | 0.324 | 0.476 | 6.112 |
| -0.197 | 0.846 | 19.000 | 0.450 | 0.476 | 6.112 |
| -1.064 | 0.301 | 19.000 | 0.385 | 0.476 | 6.112 |
| 0.348  | 0.731 | 19.000 | 0.446 | 0.476 | 6.112 |
| -1.161 | 0.260 | 19.000 | 0.306 | 0.476 | 6.112 |
| -0.988 | 0.336 | 19.000 | 0.628 | 0.476 | 6.112 |
| -0.549 | 0.590 | 19.000 | 0.978 | 0.476 | 6.112 |

|        |       |        |       |       |       |
|--------|-------|--------|-------|-------|-------|
| -0.919 | 0.369 | 19.000 | 0.461 | 0.476 | 6.112 |
| 2.441  | 0.025 | 19.000 | 0.424 | 0.476 | 6.112 |
| 1.487  | 0.154 | 19.000 | 0.626 | 0.476 | 6.112 |
| 1.899  | 0.073 | 19.000 | 0.789 | 0.476 | 6.112 |
| -2.132 | 0.046 | 19.000 | 0.423 | 0.476 | 6.112 |
| -0.641 | 0.529 | 19.000 | 0.366 | 0.476 | 6.112 |
| 1.743  | 0.097 | 19.000 | 0.499 | 0.476 | 6.112 |
| -2.897 | 0.009 | 19.000 | 0.677 | 0.476 | 6.112 |
| 1.565  | 0.134 | 19.000 | 0.784 | 0.476 | 6.112 |
| 0.426  | 0.675 | 19.000 | 0.601 | 0.476 | 6.112 |
| 1.945  | 0.067 | 19.000 | 0.356 | 0.476 | 6.112 |
| -3.030 | 0.007 | 19.000 | 0.502 | 0.476 | 6.112 |
| -0.580 | 0.569 | 19.000 | 0.430 | 0.476 | 6.112 |
| 2.264  | 0.035 | 19.000 | 0.546 | 0.476 | 6.112 |
| 0.720  | 0.480 | 19.000 | 0.541 | 0.476 | 6.112 |
| 0.480  | 0.636 | 19.000 | 0.910 | 0.476 | 6.112 |
| -2.795 | 0.012 | 19.000 | 0.982 | 0.476 | 6.112 |
| 1.724  | 0.101 | 19.000 | 0.967 | 0.476 | 6.112 |
| -2.120 | 0.047 | 19.000 | 0.746 | 0.476 | 6.112 |
| 0.438  | 0.667 | 19.000 | 0.663 | 0.476 | 6.112 |
| 1.595  | 0.127 | 19.000 | 0.508 | 0.476 | 6.112 |
| -2.285 | 0.034 | 19.000 | 0.404 | 0.476 | 6.112 |
| 2.316  | 0.032 | 19.000 | 0.312 | 0.476 | 6.112 |
| -0.536 | 0.598 | 19.000 | 0.595 | 0.476 | 6.112 |
| -0.758 | 0.458 | 19.000 | 0.546 | 0.476 | 6.112 |
| -0.442 | 0.664 | 19.000 | 0.739 | 0.476 | 6.112 |
| 0.867  | 0.397 | 19.000 | 0.508 | 0.476 | 6.112 |
| -0.218 | 0.830 | 19.000 | 0.374 | 0.476 | 6.112 |
| -2.420 | 0.026 | 19.000 | 0.815 | 0.476 | 6.112 |
| 1.071  | 0.297 | 19.000 | 0.545 | 0.476 | 6.112 |
| 0.147  | 0.885 | 19.000 | 0.430 | 0.476 | 6.112 |
| 2.095  | 0.050 | 19.000 | 0.495 | 0.476 | 6.112 |
| 1.298  | 0.210 | 19.000 | 0.460 | 0.476 | 6.112 |
| -0.012 | 0.990 | 19.000 | 0.391 | 0.476 | 6.112 |
| 2.337  | 0.031 | 19.000 | 0.616 | 0.476 | 6.112 |
| 1.017  | 0.322 | 19.000 | 0.461 | 0.476 | 6.112 |
| -1.837 | 0.082 | 19.000 | 1.477 | 0.476 | 6.112 |
| 1.911  | 0.071 | 19.000 | 0.566 | 0.476 | 6.112 |
| -2.388 | 0.027 | 19.000 | 0.426 | 0.476 | 6.112 |
| -0.836 | 0.414 | 19.000 | 0.439 | 0.476 | 6.112 |
| 0.743  | 0.466 | 19.000 | 0.689 | 0.476 | 6.112 |
| -2.325 | 0.031 | 19.000 | 0.395 | 0.476 | 6.112 |
| -1.323 | 0.202 | 19.000 | 0.543 | 0.476 | 6.112 |
| -1.181 | 0.252 | 19.000 | 0.298 | 0.476 | 6.112 |
| 1.641  | 0.117 | 19.000 | 0.438 | 0.476 | 6.112 |
| 1.550  | 0.138 | 19.000 | 0.395 | 0.476 | 6.112 |
| -2.581 | 0.018 | 19.000 | 0.473 | 0.476 | 6.112 |
| 1.068  | 0.299 | 19.000 | 0.403 | 0.476 | 6.112 |
| -0.361 | 0.722 | 19.000 | 0.558 | 0.476 | 6.112 |
| 2.753  | 0.013 | 19.000 | 0.504 | 0.476 | 6.112 |

|        |       |        |       |       |       |
|--------|-------|--------|-------|-------|-------|
| 1.728  | 0.100 | 19.000 | 0.567 | 0.476 | 6.112 |
| -0.457 | 0.653 | 19.000 | 0.418 | 0.476 | 6.112 |
| 2.426  | 0.025 | 19.000 | 0.520 | 0.476 | 6.112 |
| 0.695  | 0.495 | 19.000 | 0.477 | 0.476 | 6.112 |
| 2.154  | 0.044 | 19.000 | 0.310 | 0.476 | 6.112 |
| 1.821  | 0.084 | 19.000 | 0.396 | 0.476 | 6.112 |
| 1.703  | 0.105 | 19.000 | 0.336 | 0.476 | 6.112 |
| 0.712  | 0.485 | 19.000 | 0.407 | 0.476 | 6.112 |
| 0.681  | 0.504 | 19.000 | 0.412 | 0.476 | 6.112 |
| 1.756  | 0.095 | 19.000 | 0.329 | 0.476 | 6.112 |
| 1.660  | 0.113 | 19.000 | 0.473 | 0.476 | 6.112 |
| 1.247  | 0.227 | 19.000 | 0.381 | 0.476 | 6.112 |
| -1.332 | 0.199 | 19.000 | 0.330 | 0.476 | 6.112 |
| -1.296 | 0.211 | 19.000 | 0.324 | 0.476 | 6.112 |
| 0.113  | 0.911 | 19.000 | 0.477 | 0.476 | 6.112 |
| -2.910 | 0.009 | 19.000 | 0.705 | 0.476 | 6.112 |
| 2.745  | 0.013 | 19.000 | 1.517 | 0.476 | 6.112 |
| -0.751 | 0.462 | 19.000 | 0.638 | 0.476 | 6.112 |
| -3.118 | 0.006 | 19.000 | 0.460 | 0.476 | 6.112 |
| -3.082 | 0.006 | 19.000 | 0.457 | 0.476 | 6.112 |
| -2.897 | 0.009 | 19.000 | 0.465 | 0.476 | 6.112 |
| -2.645 | 0.016 | 19.000 | 0.445 | 0.476 | 6.112 |
| -0.832 | 0.416 | 19.000 | 0.494 | 0.476 | 6.112 |
| 2.131  | 0.046 | 19.000 | 0.228 | 0.476 | 6.112 |
| 2.319  | 0.032 | 19.000 | 0.280 | 0.476 | 6.112 |
| 1.337  | 0.197 | 19.000 | 0.488 | 0.476 | 6.112 |
| 0.129  | 0.899 | 19.000 | 0.668 | 0.476 | 6.112 |
| 1.276  | 0.217 | 19.000 | 0.405 | 0.476 | 6.112 |
| 0.022  | 0.982 | 19.000 | 0.493 | 0.476 | 6.112 |
| -0.712 | 0.485 | 19.000 | 0.535 | 0.476 | 6.112 |
| 1.044  | 0.309 | 19.000 | 0.358 | 0.476 | 6.112 |
| 2.195  | 0.041 | 19.000 | 0.596 | 0.476 | 6.112 |
| -2.569 | 0.019 | 19.000 | 0.325 | 0.476 | 6.112 |
| -0.009 | 0.993 | 19.000 | 2.028 | 0.476 | 6.112 |
| -0.044 | 0.965 | 19.000 | 0.468 | 0.476 | 6.112 |
| -0.475 | 0.640 | 19.000 | 0.505 | 0.476 | 6.112 |
| -2.514 | 0.021 | 19.000 | 0.329 | 0.476 | 6.112 |
| 0.781  | 0.444 | 19.000 | 0.513 | 0.476 | 6.112 |
| -1.494 | 0.152 | 19.000 | 0.667 | 0.476 | 6.112 |
| -1.219 | 0.238 | 19.000 | 0.999 | 0.476 | 6.112 |
| -1.149 | 0.265 | 19.000 | 1.011 | 0.476 | 6.112 |
| 1.247  | 0.228 | 19.000 | 0.347 | 0.476 | 6.112 |
| -0.500 | 0.623 | 19.000 | 0.542 | 0.476 | 6.112 |
| -1.474 | 0.157 | 19.000 | 0.452 | 0.476 | 6.112 |
| 0.467  | 0.646 | 19.000 | 0.390 | 0.476 | 6.112 |
| 0.259  | 0.798 | 19.000 | 0.499 | 0.476 | 6.112 |
| -1.966 | 0.064 | 19.000 | 0.352 | 0.476 | 6.112 |
| 1.273  | 0.218 | 19.000 | 0.380 | 0.476 | 6.112 |
| 2.040  | 0.055 | 19.000 | 0.418 | 0.476 | 6.112 |

|        |       |        |       |       |       |
|--------|-------|--------|-------|-------|-------|
| 1.760  | 0.095 | 19.000 | 0.349 | 0.476 | 6.112 |
| -1.427 | 0.170 | 19.000 | 0.600 | 0.476 | 6.112 |
| -3.526 | 0.002 | 19.000 | 0.342 | 0.476 | 6.112 |
| 1.672  | 0.111 | 19.000 | 0.933 | 0.476 | 6.112 |
| -0.273 | 0.788 | 19.000 | 0.328 | 0.476 | 6.112 |
| -0.855 | 0.403 | 19.000 | 0.378 | 0.476 | 6.112 |
| -2.703 | 0.014 | 19.000 | 0.566 | 0.476 | 6.112 |
| 2.850  | 0.010 | 19.000 | 0.340 | 0.476 | 6.112 |
| 1.324  | 0.201 | 19.000 | 0.727 | 0.476 | 6.112 |
| 0.123  | 0.903 | 19.000 | 0.481 | 0.476 | 6.112 |
| -0.789 | 0.440 | 19.000 | 0.406 | 0.476 | 6.112 |
| 1.590  | 0.128 | 19.000 | 1.012 | 0.476 | 6.112 |
| 1.295  | 0.211 | 19.000 | 0.470 | 0.476 | 6.112 |
| 2.158  | 0.044 | 19.000 | 0.783 | 0.476 | 6.112 |
| 2.647  | 0.016 | 19.000 | 0.421 | 0.476 | 6.112 |
| 2.276  | 0.035 | 19.000 | 0.267 | 0.476 | 6.112 |
| 1.895  | 0.073 | 19.000 | 0.553 | 0.476 | 6.112 |
| 2.107  | 0.049 | 19.000 | 0.637 | 0.476 | 6.112 |
| -1.689 | 0.108 | 19.000 | 0.654 | 0.476 | 6.112 |
| 2.817  | 0.011 | 19.000 | 0.592 | 0.476 | 6.112 |
| -2.273 | 0.035 | 19.000 | 0.484 | 0.476 | 6.112 |
| -1.625 | 0.121 | 19.000 | 0.515 | 0.476 | 6.112 |
| -0.708 | 0.488 | 19.000 | 0.463 | 0.476 | 6.112 |
| 2.779  | 0.012 | 19.000 | 0.499 | 0.476 | 6.112 |
| -1.308 | 0.207 | 19.000 | 0.534 | 0.476 | 6.112 |
| -0.374 | 0.712 | 19.000 | 0.480 | 0.476 | 6.112 |
| 1.089  | 0.290 | 19.000 | 0.419 | 0.476 | 6.112 |
| 1.480  | 0.155 | 19.000 | 0.366 | 0.476 | 6.112 |
| 1.082  | 0.293 | 19.000 | 0.397 | 0.476 | 6.112 |
| 0.638  | 0.531 | 19.000 | 0.323 | 0.476 | 6.112 |
| 3.426  | 0.003 | 19.000 | 0.417 | 0.476 | 6.112 |
| -2.596 | 0.018 | 19.000 | 0.402 | 0.476 | 6.112 |
| -1.781 | 0.091 | 19.000 | 0.614 | 0.476 | 6.112 |
| -2.660 | 0.015 | 19.000 | 0.395 | 0.476 | 6.112 |
| 2.509  | 0.021 | 19.000 | 0.795 | 0.476 | 6.112 |
| 2.883  | 0.010 | 19.000 | 0.941 | 0.476 | 6.112 |
| -0.879 | 0.391 | 19.000 | 0.745 | 0.476 | 6.112 |
| 1.861  | 0.078 | 19.000 | 0.522 | 0.476 | 6.112 |
| -0.651 | 0.523 | 19.000 | 0.428 | 0.476 | 6.112 |
| -1.348 | 0.194 | 19.000 | 0.531 | 0.476 | 6.112 |
| -2.200 | 0.040 | 19.000 | 0.962 | 0.476 | 6.112 |
| -1.317 | 0.204 | 19.000 | 0.536 | 0.476 | 6.112 |
| -0.045 | 0.965 | 19.000 | 0.453 | 0.476 | 6.112 |
| -0.301 | 0.766 | 19.000 | 0.953 | 0.476 | 6.112 |
| 0.199  | 0.845 | 19.000 | 0.476 | 0.476 | 6.112 |
| 1.501  | 0.150 | 19.000 | 0.277 | 0.476 | 6.112 |
| 2.373  | 0.028 | 19.000 | 0.262 | 0.476 | 6.112 |
| -0.707 | 0.488 | 19.000 | 0.505 | 0.476 | 6.112 |
| -2.508 | 0.021 | 19.000 | 0.524 | 0.476 | 6.112 |
| 2.808  | 0.011 | 19.000 | 0.634 | 0.476 | 6.112 |

|        |       |        |       |       |       |
|--------|-------|--------|-------|-------|-------|
| 1.488  | 0.153 | 19.000 | 0.508 | 0.476 | 6.112 |
| 0.529  | 0.603 | 19.000 | 0.378 | 0.476 | 6.112 |
| 2.104  | 0.049 | 19.000 | 0.710 | 0.476 | 6.112 |
| 2.358  | 0.029 | 19.000 | 0.735 | 0.476 | 6.112 |
| -1.447 | 0.164 | 19.000 | 0.308 | 0.476 | 6.112 |
| 2.956  | 0.008 | 19.000 | 0.817 | 0.476 | 6.112 |
| -1.436 | 0.167 | 19.000 | 0.416 | 0.476 | 6.112 |
| -0.013 | 0.990 | 19.000 | 0.531 | 0.476 | 6.112 |
| 2.657  | 0.016 | 19.000 | 0.625 | 0.476 | 6.112 |
| 0.214  | 0.833 | 19.000 | 0.414 | 0.476 | 6.112 |
| 2.442  | 0.025 | 19.000 | 0.927 | 0.476 | 6.112 |
| 1.972  | 0.063 | 19.000 | 0.986 | 0.476 | 6.112 |
| 1.885  | 0.075 | 19.000 | 0.466 | 0.476 | 6.112 |
| -1.983 | 0.062 | 19.000 | 0.507 | 0.476 | 6.112 |
| -0.643 | 0.528 | 19.000 | 0.474 | 0.476 | 6.112 |
| 1.142  | 0.268 | 19.000 | 0.838 | 0.476 | 6.112 |
| 1.617  | 0.122 | 19.000 | 0.386 | 0.476 | 6.112 |
| 1.801  | 0.088 | 19.000 | 0.527 | 0.476 | 6.112 |
| 0.889  | 0.385 | 19.000 | 0.424 | 0.476 | 6.112 |
| 3.184  | 0.005 | 19.000 | 0.450 | 0.476 | 6.112 |
| -1.927 | 0.069 | 19.000 | 0.790 | 0.476 | 6.112 |
| 1.013  | 0.324 | 19.000 | 0.259 | 0.476 | 6.112 |
| 1.241  | 0.230 | 19.000 | 0.411 | 0.476 | 6.112 |
| -2.200 | 0.040 | 19.000 | 0.509 | 0.476 | 6.112 |
| 3.299  | 0.004 | 19.000 | 0.293 | 0.476 | 6.112 |
| 3.916  | 0.001 | 19.000 | 0.303 | 0.476 | 6.112 |
| 1.984  | 0.062 | 19.000 | 0.799 | 0.476 | 6.112 |
| 2.762  | 0.012 | 19.000 | 0.421 | 0.476 | 6.112 |
| -1.278 | 0.217 | 19.000 | 0.412 | 0.476 | 6.112 |
| 0.555  | 0.585 | 19.000 | 1.031 | 0.476 | 6.112 |
| -1.763 | 0.094 | 19.000 | 0.479 | 0.476 | 6.112 |
| 2.231  | 0.038 | 19.000 | 0.491 | 0.476 | 6.112 |
| -0.652 | 0.522 | 19.000 | 1.003 | 0.476 | 6.112 |
| -1.809 | 0.086 | 19.000 | 0.344 | 0.476 | 6.112 |
| -2.223 | 0.039 | 19.000 | 0.643 | 0.476 | 6.112 |
| 0.559  | 0.583 | 19.000 | 0.598 | 0.476 | 6.112 |
| -0.620 | 0.542 | 19.000 | 0.446 | 0.476 | 6.112 |
| 1.652  | 0.115 | 19.000 | 0.569 | 0.476 | 6.112 |
| 1.541  | 0.140 | 19.000 | 0.593 | 0.476 | 6.112 |
| -1.117 | 0.278 | 19.000 | 0.725 | 0.476 | 6.112 |
| 0.368  | 0.717 | 19.000 | 0.515 | 0.476 | 6.112 |
| -0.295 | 0.771 | 19.000 | 0.424 | 0.476 | 6.112 |
| 2.069  | 0.052 | 19.000 | 0.241 | 0.476 | 6.112 |
| -0.007 | 0.994 | 19.000 | 0.451 | 0.476 | 6.112 |
| -0.819 | 0.423 | 19.000 | 0.695 | 0.476 | 6.112 |
| 1.025  | 0.318 | 19.000 | 0.320 | 0.476 | 6.112 |
| -3.158 | 0.005 | 19.000 | 0.351 | 0.476 | 6.112 |
| 0.138  | 0.891 | 19.000 | 0.343 | 0.476 | 6.112 |
| 0.957  | 0.351 | 19.000 | 0.250 | 0.476 | 6.112 |
| 0.127  | 0.901 | 19.000 | 0.308 | 0.476 | 6.112 |

|        |       |        |       |       |       |
|--------|-------|--------|-------|-------|-------|
| 1.768  | 0.093 | 19.000 | 0.326 | 0.476 | 6.112 |
| 0.386  | 0.704 | 19.000 | 0.262 | 0.476 | 6.112 |
| 1.035  | 0.314 | 19.000 | 0.375 | 0.476 | 6.112 |
| 0.933  | 0.363 | 19.000 | 0.424 | 0.476 | 6.112 |
| -1.105 | 0.283 | 19.000 | 0.431 | 0.476 | 6.112 |
| -1.720 | 0.102 | 19.000 | 0.397 | 0.476 | 6.112 |
| -0.090 | 0.929 | 19.000 | 0.803 | 0.476 | 6.112 |
| -3.109 | 0.006 | 19.000 | 0.406 | 0.476 | 6.112 |
| -3.052 | 0.007 | 19.000 | 0.359 | 0.476 | 6.112 |
| 1.689  | 0.108 | 19.000 | 1.312 | 0.476 | 6.112 |
| 2.470  | 0.023 | 19.000 | 0.376 | 0.476 | 6.112 |
| 0.941  | 0.359 | 19.000 | 0.462 | 0.476 | 6.112 |
| 0.716  | 0.483 | 19.000 | 0.576 | 0.476 | 6.112 |
| -0.827 | 0.418 | 19.000 | 0.569 | 0.476 | 6.112 |
| -1.954 | 0.066 | 19.000 | 0.425 | 0.476 | 6.112 |
| -0.162 | 0.873 | 19.000 | 0.295 | 0.476 | 6.112 |
| -1.670 | 0.111 | 19.000 | 0.566 | 0.476 | 6.112 |
| 2.515  | 0.021 | 19.000 | 1.035 | 0.476 | 6.112 |
| 1.252  | 0.226 | 19.000 | 0.659 | 0.476 | 6.112 |
| -2.645 | 0.016 | 19.000 | 0.393 | 0.476 | 6.112 |
| -3.107 | 0.006 | 19.000 | 0.602 | 0.476 | 6.112 |
| -0.866 | 0.397 | 19.000 | 0.416 | 0.476 | 6.112 |
| -1.769 | 0.093 | 19.000 | 0.531 | 0.476 | 6.112 |
| 2.410  | 0.026 | 19.000 | 0.349 | 0.476 | 6.112 |
| -2.725 | 0.013 | 19.000 | 0.702 | 0.476 | 6.112 |
| -2.779 | 0.012 | 19.000 | 0.653 | 0.476 | 6.112 |
| -1.454 | 0.162 | 19.000 | 0.276 | 0.476 | 6.112 |
| 0.509  | 0.617 | 19.000 | 0.409 | 0.476 | 6.112 |
| -0.500 | 0.623 | 19.000 | 0.489 | 0.476 | 6.112 |
| 1.999  | 0.060 | 19.000 | 0.560 | 0.476 | 6.112 |
| 1.092  | 0.288 | 19.000 | 0.393 | 0.476 | 6.112 |
| 1.705  | 0.105 | 19.000 | 1.236 | 0.476 | 6.112 |
| 2.891  | 0.009 | 19.000 | 0.388 | 0.476 | 6.112 |
| 0.595  | 0.559 | 19.000 | 0.659 | 0.476 | 6.112 |
| 1.251  | 0.226 | 19.000 | 0.546 | 0.476 | 6.112 |
| -2.256 | 0.036 | 19.000 | 0.348 | 0.476 | 6.112 |
| -0.090 | 0.930 | 19.000 | 0.506 | 0.476 | 6.112 |
| 0.229  | 0.822 | 19.000 | 0.521 | 0.476 | 6.112 |
| 2.184  | 0.042 | 19.000 | 0.498 | 0.476 | 6.112 |
| 2.200  | 0.040 | 19.000 | 0.603 | 0.476 | 6.112 |
| 0.266  | 0.793 | 19.000 | 0.512 | 0.476 | 6.112 |
| 1.628  | 0.120 | 19.000 | 0.512 | 0.476 | 6.112 |
| 1.427  | 0.170 | 19.000 | 0.453 | 0.476 | 6.112 |
| 1.998  | 0.060 | 19.000 | 0.268 | 0.476 | 6.112 |
| -0.859 | 0.401 | 19.000 | 0.599 | 0.476 | 6.112 |
| 1.333  | 0.198 | 19.000 | 0.462 | 0.476 | 6.112 |
| 1.620  | 0.122 | 19.000 | 0.548 | 0.476 | 6.112 |
| 2.584  | 0.018 | 19.000 | 0.838 | 0.476 | 6.112 |
| 3.240  | 0.004 | 19.000 | 0.292 | 0.476 | 6.112 |
| 2.031  | 0.057 | 19.000 | 0.651 | 0.476 | 6.112 |

|        |       |        |       |       |       |
|--------|-------|--------|-------|-------|-------|
| -1.832 | 0.083 | 19.000 | 0.518 | 0.476 | 6.112 |
| -1.643 | 0.117 | 19.000 | 1.000 | 0.476 | 6.112 |
| -2.200 | 0.040 | 19.000 | 0.415 | 0.476 | 6.112 |
| -2.914 | 0.009 | 19.000 | 0.609 | 0.476 | 6.112 |
| 2.503  | 0.022 | 19.000 | 0.973 | 0.476 | 6.112 |
| 1.480  | 0.155 | 19.000 | 0.599 | 0.476 | 6.112 |
| 1.823  | 0.084 | 19.000 | 1.153 | 0.476 | 6.112 |
| 0.140  | 0.890 | 19.000 | 0.576 | 0.476 | 6.112 |
| 0.154  | 0.880 | 19.000 | 0.512 | 0.476 | 6.112 |
| -1.576 | 0.132 | 19.000 | 0.465 | 0.476 | 6.112 |
| 2.301  | 0.033 | 19.000 | 0.461 | 0.476 | 6.112 |
| 0.998  | 0.331 | 19.000 | 1.091 | 0.476 | 6.112 |
| 1.457  | 0.162 | 19.000 | 0.300 | 0.476 | 6.112 |
| -0.836 | 0.414 | 19.000 | 1.036 | 0.476 | 6.112 |
| 0.005  | 0.996 | 19.000 | 0.289 | 0.476 | 6.112 |
| 0.740  | 0.468 | 19.000 | 0.365 | 0.476 | 6.112 |
| -2.580 | 0.018 | 19.000 | 0.352 | 0.476 | 6.112 |
| -3.145 | 0.005 | 19.000 | 0.461 | 0.476 | 6.112 |
| 0.200  | 0.844 | 19.000 | 0.383 | 0.476 | 6.112 |
| -2.562 | 0.019 | 19.000 | 0.530 | 0.476 | 6.112 |
| -1.531 | 0.142 | 19.000 | 0.505 | 0.476 | 6.112 |
| 0.941  | 0.359 | 19.000 | 0.525 | 0.476 | 6.112 |
| -1.377 | 0.184 | 19.000 | 0.468 | 0.476 | 6.112 |
| 0.137  | 0.892 | 19.000 | 0.521 | 0.476 | 6.112 |
| -1.104 | 0.284 | 19.000 | 0.419 | 0.476 | 6.112 |
| -2.683 | 0.015 | 19.000 | 0.390 | 0.476 | 6.112 |
| 2.047  | 0.055 | 19.000 | 0.666 | 0.476 | 6.112 |
| 1.407  | 0.175 | 19.000 | 0.479 | 0.476 | 6.112 |
| 1.140  | 0.269 | 19.000 | 0.310 | 0.476 | 6.112 |
| 1.563  | 0.134 | 19.000 | 0.348 | 0.476 | 6.112 |
| 0.686  | 0.501 | 19.000 | 0.479 | 0.476 | 6.112 |
| -2.139 | 0.046 | 19.000 | 0.282 | 0.476 | 6.112 |
| 2.019  | 0.058 | 19.000 | 0.577 | 0.476 | 6.112 |
| 0.965  | 0.347 | 19.000 | 0.627 | 0.476 | 6.112 |
| 1.013  | 0.324 | 19.000 | 0.714 | 0.476 | 6.112 |
| 1.284  | 0.215 | 19.000 | 0.395 | 0.476 | 6.112 |
| 2.525  | 0.021 | 19.000 | 0.281 | 0.476 | 6.112 |
| -0.192 | 0.849 | 19.000 | 0.436 | 0.476 | 6.112 |
| -2.972 | 0.008 | 19.000 | 0.339 | 0.476 | 6.112 |
| -0.929 | 0.365 | 19.000 | 0.362 | 0.476 | 6.112 |
| 1.960  | 0.065 | 19.000 | 0.393 | 0.476 | 6.112 |
| 2.042  | 0.055 | 19.000 | 0.386 | 0.476 | 6.112 |
| 2.348  | 0.030 | 19.000 | 0.295 | 0.476 | 6.112 |
| 1.659  | 0.114 | 19.000 | 0.374 | 0.476 | 6.112 |
| -0.475 | 0.640 | 19.000 | 0.640 | 0.476 | 6.112 |
| -0.030 | 0.976 | 19.000 | 0.544 | 0.476 | 6.112 |
| -1.166 | 0.258 | 19.000 | 1.159 | 0.476 | 6.112 |
| -1.054 | 0.305 | 19.000 | 0.626 | 0.476 | 6.112 |
| -1.548 | 0.138 | 19.000 | 0.554 | 0.476 | 6.112 |
| 1.575  | 0.132 | 19.000 | 0.351 | 0.476 | 6.112 |



|        |       |        |       |       |       |
|--------|-------|--------|-------|-------|-------|
| 0.235  | 0.817 | 19.000 | 0.338 | 0.476 | 6.112 |
| -0.789 | 0.440 | 19.000 | 0.317 | 0.476 | 6.112 |
| -1.775 | 0.092 | 19.000 | 0.876 | 0.476 | 6.112 |
| 0.553  | 0.587 | 19.000 | 0.509 | 0.476 | 6.112 |
| -0.773 | 0.449 | 19.000 | 0.690 | 0.476 | 6.112 |
| 0.043  | 0.966 | 19.000 | 1.680 | 0.476 | 6.112 |
| -0.355 | 0.726 | 19.000 | 0.607 | 0.476 | 6.112 |
| 3.062  | 0.006 | 19.000 | 0.372 | 0.476 | 6.112 |
| -1.871 | 0.077 | 19.000 | 0.795 | 0.476 | 6.112 |
| -2.803 | 0.011 | 19.000 | 0.454 | 0.476 | 6.112 |
| 0.708  | 0.488 | 19.000 | 0.845 | 0.476 | 6.112 |
| -1.330 | 0.199 | 19.000 | 0.500 | 0.476 | 6.112 |
| 0.928  | 0.365 | 19.000 | 0.549 | 0.476 | 6.112 |
| -0.414 | 0.683 | 19.000 | 0.772 | 0.476 | 6.112 |
| 1.738  | 0.098 | 19.000 | 0.866 | 0.476 | 6.112 |
| 0.020  | 0.984 | 19.000 | 0.479 | 0.476 | 6.112 |
| 0.456  | 0.653 | 19.000 | 0.384 | 0.476 | 6.112 |
| -0.971 | 0.344 | 19.000 | 0.262 | 0.476 | 6.112 |
| -1.605 | 0.125 | 19.000 | 0.449 | 0.476 | 6.112 |
| 0.148  | 0.884 | 19.000 | 0.697 | 0.476 | 6.112 |
| 0.899  | 0.380 | 19.000 | 0.834 | 0.476 | 6.112 |
| 3.199  | 0.005 | 19.000 | 0.229 | 0.476 | 6.112 |
| 1.414  | 0.174 | 19.000 | 0.422 | 0.476 | 6.112 |
| -1.078 | 0.295 | 19.000 | 0.538 | 0.476 | 6.112 |
| -0.490 | 0.630 | 19.000 | 0.302 | 0.476 | 6.112 |
| -0.492 | 0.628 | 19.000 | 0.586 | 0.476 | 6.112 |
| 2.065  | 0.053 | 19.000 | 0.486 | 0.476 | 6.112 |
| -3.311 | 0.004 | 19.000 | 0.517 | 0.476 | 6.112 |
| 2.462  | 0.024 | 19.000 | 0.407 | 0.476 | 6.112 |
| -1.012 | 0.324 | 19.000 | 0.643 | 0.476 | 6.112 |
| 1.391  | 0.180 | 19.000 | 0.450 | 0.476 | 6.112 |
| 1.707  | 0.104 | 19.000 | 0.779 | 0.476 | 6.112 |
| 2.306  | 0.033 | 19.000 | 0.786 | 0.476 | 6.112 |
| 1.845  | 0.081 | 19.000 | 0.793 | 0.476 | 6.112 |
| 1.770  | 0.093 | 19.000 | 0.996 | 0.476 | 6.112 |
| 3.056  | 0.007 | 19.000 | 0.466 | 0.476 | 6.112 |
| 0.324  | 0.749 | 19.000 | 0.360 | 0.476 | 6.112 |
| -2.274 | 0.035 | 19.000 | 0.637 | 0.476 | 6.112 |
| 0.404  | 0.691 | 19.000 | 0.325 | 0.476 | 6.112 |
| 1.455  | 0.162 | 19.000 | 0.527 | 0.476 | 6.112 |
| -0.127 | 0.900 | 19.000 | 0.540 | 0.476 | 6.112 |
| 0.488  | 0.631 | 19.000 | 0.566 | 0.476 | 6.112 |
| 2.002  | 0.060 | 19.000 | 0.702 | 0.476 | 6.112 |
| -0.389 | 0.701 | 19.000 | 0.442 | 0.476 | 6.112 |
| 2.552  | 0.019 | 19.000 | 0.363 | 0.476 | 6.112 |
| -1.664 | 0.113 | 19.000 | 0.443 | 0.476 | 6.112 |
| 0.670  | 0.511 | 19.000 | 0.348 | 0.476 | 6.112 |
| 2.114  | 0.048 | 19.000 | 0.651 | 0.476 | 6.112 |
| -0.307 | 0.762 | 19.000 | 0.432 | 0.476 | 6.112 |
| -1.052 | 0.306 | 19.000 | 0.604 | 0.476 | 6.112 |

|        |       |        |       |       |       |
|--------|-------|--------|-------|-------|-------|
| 2.767  | 0.012 | 19.000 | 0.369 | 0.476 | 6.112 |
| 2.550  | 0.020 | 19.000 | 0.452 | 0.476 | 6.112 |
| 0.918  | 0.370 | 19.000 | 0.237 | 0.476 | 6.112 |
| -0.002 | 0.999 | 19.000 | 1.154 | 0.476 | 6.112 |
| 1.204  | 0.244 | 19.000 | 0.239 | 0.476 | 6.112 |
| -0.265 | 0.794 | 19.000 | 0.642 | 0.476 | 6.112 |
| 2.214  | 0.039 | 19.000 | 0.346 | 0.476 | 6.112 |
| -0.507 | 0.618 | 19.000 | 0.626 | 0.476 | 6.112 |
| 1.684  | 0.108 | 19.000 | 0.529 | 0.476 | 6.112 |
| 1.404  | 0.176 | 19.000 | 1.098 | 0.476 | 6.112 |
| 1.805  | 0.087 | 19.000 | 0.921 | 0.476 | 6.112 |
| -2.686 | 0.015 | 19.000 | 0.366 | 0.476 | 6.112 |
| -0.887 | 0.386 | 19.000 | 0.522 | 0.476 | 6.112 |
| 1.262  | 0.222 | 19.000 | 0.488 | 0.476 | 6.112 |
| 3.199  | 0.005 | 19.000 | 0.302 | 0.476 | 6.112 |
| 1.573  | 0.132 | 19.000 | 0.680 | 0.476 | 6.112 |
| -0.762 | 0.456 | 19.000 | 0.422 | 0.476 | 6.112 |
| -0.155 | 0.878 | 19.000 | 0.453 | 0.476 | 6.112 |
| -2.752 | 0.013 | 19.000 | 0.592 | 0.476 | 6.112 |
| 1.777  | 0.092 | 19.000 | 0.938 | 0.476 | 6.112 |
| 1.244  | 0.229 | 19.000 | 0.460 | 0.476 | 6.112 |
| -0.049 | 0.961 | 19.000 | 0.376 | 0.476 | 6.112 |
| -2.717 | 0.014 | 19.000 | 0.786 | 0.476 | 6.112 |
| -0.162 | 0.873 | 19.000 | 0.441 | 0.476 | 6.112 |
| 1.704  | 0.105 | 19.000 | 0.875 | 0.476 | 6.112 |
| -0.816 | 0.425 | 19.000 | 0.467 | 0.476 | 6.112 |
| 0.286  | 0.778 | 19.000 | 0.310 | 0.476 | 6.112 |
| -0.064 | 0.950 | 19.000 | 0.466 | 0.476 | 6.112 |
| -2.223 | 0.039 | 19.000 | 0.324 | 0.476 | 6.112 |
| 0.339  | 0.738 | 19.000 | 0.576 | 0.476 | 6.112 |
| -0.162 | 0.873 | 19.000 | 0.429 | 0.476 | 6.112 |
| -0.274 | 0.787 | 19.000 | 0.412 | 0.476 | 6.112 |
| -0.757 | 0.458 | 19.000 | 0.447 | 0.476 | 6.112 |
| -1.453 | 0.163 | 19.000 | 0.866 | 0.476 | 6.112 |
| 0.027  | 0.979 | 19.000 | 0.476 | 0.476 | 6.112 |
| -1.835 | 0.082 | 19.000 | 0.359 | 0.476 | 6.112 |
| -1.344 | 0.195 | 19.000 | 0.299 | 0.476 | 6.112 |
| 2.333  | 0.031 | 19.000 | 0.389 | 0.476 | 6.112 |
| 2.206  | 0.040 | 19.000 | 0.486 | 0.476 | 6.112 |
| 1.016  | 0.322 | 19.000 | 0.736 | 0.476 | 6.112 |
| -1.193 | 0.247 | 19.000 | 0.343 | 0.476 | 6.112 |
| -0.312 | 0.758 | 19.000 | 0.496 | 0.476 | 6.112 |
| 0.415  | 0.683 | 19.000 | 0.725 | 0.476 | 6.112 |
| -1.471 | 0.158 | 19.000 | 0.777 | 0.476 | 6.112 |
| 1.269  | 0.220 | 19.000 | 0.503 | 0.476 | 6.112 |
| 2.012  | 0.059 | 19.000 | 0.976 | 0.476 | 6.112 |
| 1.723  | 0.101 | 19.000 | 0.724 | 0.476 | 6.112 |
| 2.457  | 0.024 | 19.000 | 1.296 | 0.476 | 6.112 |
| -1.289 | 0.213 | 19.000 | 0.447 | 0.476 | 6.112 |
| 1.763  | 0.094 | 19.000 | 0.440 | 0.476 | 6.112 |

|        |       |        |       |       |       |
|--------|-------|--------|-------|-------|-------|
| -0.259 | 0.798 | 19.000 | 0.757 | 0.476 | 6.112 |
| -0.628 | 0.537 | 19.000 | 0.489 | 0.476 | 6.112 |
| 0.413  | 0.684 | 19.000 | 0.387 | 0.476 | 6.112 |
| -1.091 | 0.289 | 19.000 | 0.393 | 0.476 | 6.112 |
| 2.372  | 0.028 | 19.000 | 0.440 | 0.476 | 6.112 |
| 0.228  | 0.822 | 19.000 | 0.467 | 0.476 | 6.112 |
| -3.194 | 0.005 | 19.000 | 0.667 | 0.476 | 6.112 |
| -0.677 | 0.507 | 19.000 | 0.577 | 0.476 | 6.112 |
| -2.469 | 0.023 | 19.000 | 0.700 | 0.476 | 6.112 |
| -1.379 | 0.184 | 19.000 | 1.086 | 0.476 | 6.112 |
| -0.646 | 0.526 | 19.000 | 0.451 | 0.476 | 6.112 |
| 1.240  | 0.230 | 19.000 | 0.479 | 0.476 | 6.112 |
| -2.279 | 0.034 | 19.000 | 0.958 | 0.476 | 6.112 |
| -2.459 | 0.024 | 19.000 | 0.334 | 0.476 | 6.112 |
| -0.094 | 0.926 | 19.000 | 0.456 | 0.476 | 6.112 |
| 1.406  | 0.176 | 19.000 | 0.968 | 0.476 | 6.112 |
| -2.815 | 0.011 | 19.000 | 0.408 | 0.476 | 6.112 |
| -1.458 | 0.161 | 19.000 | 0.478 | 0.476 | 6.112 |
| -1.117 | 0.278 | 19.000 | 0.401 | 0.476 | 6.112 |
| 2.261  | 0.036 | 19.000 | 0.416 | 0.476 | 6.112 |
| 1.812  | 0.086 | 19.000 | 0.374 | 0.476 | 6.112 |
| 1.966  | 0.064 | 19.000 | 0.760 | 0.476 | 6.112 |
| -1.402 | 0.177 | 19.000 | 0.621 | 0.476 | 6.112 |
| -0.876 | 0.392 | 19.000 | 0.529 | 0.476 | 6.112 |
| 1.594  | 0.127 | 19.000 | 0.517 | 0.476 | 6.112 |
| 1.885  | 0.075 | 19.000 | 0.381 | 0.476 | 6.112 |
| -0.143 | 0.888 | 19.000 | 0.365 | 0.476 | 6.112 |
| 2.059  | 0.053 | 19.000 | 0.451 | 0.476 | 6.112 |
| 2.365  | 0.029 | 19.000 | 1.009 | 0.476 | 6.112 |
| 1.311  | 0.205 | 19.000 | 0.585 | 0.476 | 6.112 |
| 1.751  | 0.096 | 19.000 | 0.562 | 0.476 | 6.112 |
| 2.140  | 0.046 | 19.000 | 0.746 | 0.476 | 6.112 |
| 1.765  | 0.094 | 19.000 | 0.379 | 0.476 | 6.112 |
| 3.325  | 0.004 | 19.000 | 0.977 | 0.476 | 6.112 |
| -1.599 | 0.126 | 19.000 | 0.395 | 0.476 | 6.112 |
| -1.201 | 0.244 | 19.000 | 0.414 | 0.476 | 6.112 |
| 2.452  | 0.024 | 19.000 | 0.906 | 0.476 | 6.112 |
| -2.141 | 0.045 | 19.000 | 0.507 | 0.476 | 6.112 |
| 1.897  | 0.073 | 19.000 | 0.454 | 0.476 | 6.112 |
| -1.805 | 0.087 | 19.000 | 0.379 | 0.476 | 6.112 |
| 0.385  | 0.705 | 19.000 | 0.374 | 0.476 | 6.112 |
| -0.779 | 0.446 | 19.000 | 0.411 | 0.476 | 6.112 |
| 1.205  | 0.243 | 19.000 | 0.404 | 0.476 | 6.112 |
| -0.672 | 0.510 | 19.000 | 0.490 | 0.476 | 6.112 |
| -0.462 | 0.649 | 19.000 | 0.598 | 0.476 | 6.112 |
| -2.068 | 0.053 | 19.000 | 0.344 | 0.476 | 6.112 |
| -1.478 | 0.156 | 19.000 | 0.404 | 0.476 | 6.112 |
| -2.659 | 0.015 | 19.000 | 0.825 | 0.476 | 6.112 |
| 0.285  | 0.779 | 19.000 | 0.357 | 0.476 | 6.112 |
| 2.459  | 0.024 | 19.000 | 0.714 | 0.476 | 6.112 |

|        |       |        |       |       |       |
|--------|-------|--------|-------|-------|-------|
| 1.955  | 0.066 | 19.000 | 0.438 | 0.476 | 6.112 |
| -2.227 | 0.038 | 19.000 | 0.395 | 0.476 | 6.112 |
| -0.656 | 0.520 | 19.000 | 0.504 | 0.476 | 6.112 |
| 2.133  | 0.046 | 19.000 | 0.987 | 0.476 | 6.112 |
| 2.087  | 0.051 | 19.000 | 0.293 | 0.476 | 6.112 |
| -1.081 | 0.293 | 19.000 | 0.262 | 0.476 | 6.112 |
| -0.317 | 0.755 | 19.000 | 0.464 | 0.476 | 6.112 |
| -2.435 | 0.025 | 19.000 | 0.720 | 0.476 | 6.112 |
| 1.279  | 0.216 | 19.000 | 0.476 | 0.476 | 6.112 |
| 0.426  | 0.675 | 19.000 | 0.559 | 0.476 | 6.112 |
| 0.444  | 0.662 | 19.000 | 0.580 | 0.476 | 6.112 |
| 2.002  | 0.060 | 19.000 | 0.569 | 0.476 | 6.112 |
| 1.555  | 0.137 | 19.000 | 0.343 | 0.476 | 6.112 |
| -1.128 | 0.273 | 19.000 | 0.736 | 0.476 | 6.112 |
| 1.368  | 0.187 | 19.000 | 0.407 | 0.476 | 6.112 |
| 2.893  | 0.009 | 19.000 | 0.349 | 0.476 | 6.112 |
| 0.723  | 0.478 | 19.000 | 0.357 | 0.476 | 6.112 |
| -2.069 | 0.052 | 19.000 | 0.802 | 0.476 | 6.112 |
| -1.964 | 0.064 | 19.000 | 0.576 | 0.476 | 6.112 |
| 2.188  | 0.041 | 19.000 | 0.436 | 0.476 | 6.112 |
| 1.521  | 0.145 | 19.000 | 0.368 | 0.476 | 6.112 |
| -0.989 | 0.335 | 19.000 | 0.271 | 0.476 | 6.112 |
| -0.060 | 0.953 | 19.000 | 0.468 | 0.476 | 6.112 |
| 1.822  | 0.084 | 19.000 | 0.352 | 0.476 | 6.112 |
| 2.401  | 0.027 | 19.000 | 0.620 | 0.476 | 6.112 |
| 1.753  | 0.096 | 19.000 | 0.379 | 0.476 | 6.112 |
| 0.693  | 0.497 | 19.000 | 0.503 | 0.476 | 6.112 |
| -1.275 | 0.218 | 19.000 | 0.466 | 0.476 | 6.112 |
| -3.544 | 0.002 | 19.000 | 0.458 | 0.476 | 6.112 |
| -0.419 | 0.680 | 19.000 | 0.508 | 0.476 | 6.112 |
| 1.230  | 0.234 | 19.000 | 1.009 | 0.476 | 6.112 |
| 0.257  | 0.800 | 19.000 | 0.427 | 0.476 | 6.112 |
| -1.392 | 0.180 | 19.000 | 0.828 | 0.476 | 6.112 |
| 2.766  | 0.012 | 19.000 | 0.669 | 0.476 | 6.112 |
| -0.859 | 0.401 | 19.000 | 0.830 | 0.476 | 6.112 |
| 1.024  | 0.318 | 19.000 | 0.461 | 0.476 | 6.112 |
| 1.515  | 0.146 | 19.000 | 0.510 | 0.476 | 6.112 |
| 0.892  | 0.383 | 19.000 | 0.266 | 0.476 | 6.112 |
| -2.844 | 0.010 | 19.000 | 0.901 | 0.476 | 6.112 |
| -1.852 | 0.080 | 19.000 | 0.424 | 0.476 | 6.112 |
| 1.334  | 0.198 | 19.000 | 0.816 | 0.476 | 6.112 |
| 0.614  | 0.547 | 19.000 | 0.538 | 0.476 | 6.112 |
| 0.778  | 0.446 | 19.000 | 0.481 | 0.476 | 6.112 |
| -1.507 | 0.148 | 19.000 | 0.377 | 0.476 | 6.112 |
| 0.733  | 0.472 | 19.000 | 0.529 | 0.476 | 6.112 |
| -0.408 | 0.688 | 19.000 | 0.340 | 0.476 | 6.112 |
| -1.618 | 0.122 | 19.000 | 0.619 | 0.476 | 6.112 |
| 1.472  | 0.157 | 19.000 | 0.269 | 0.476 | 6.112 |
| 1.310  | 0.206 | 19.000 | 0.446 | 0.476 | 6.112 |
| 2.876  | 0.010 | 19.000 | 0.556 | 0.476 | 6.112 |

|        |       |        |       |       |       |
|--------|-------|--------|-------|-------|-------|
| -0.879 | 0.391 | 19.000 | 0.498 | 0.476 | 6.112 |
| -1.728 | 0.100 | 19.000 | 0.411 | 0.476 | 6.112 |
| -0.812 | 0.427 | 19.000 | 0.686 | 0.476 | 6.112 |
| 0.228  | 0.822 | 19.000 | 0.462 | 0.476 | 6.112 |
| 1.020  | 0.321 | 19.000 | 0.547 | 0.476 | 6.112 |
| -1.929 | 0.069 | 19.000 | 0.369 | 0.476 | 6.112 |
| -1.558 | 0.136 | 19.000 | 0.327 | 0.476 | 6.112 |
| 2.429  | 0.025 | 19.000 | 0.359 | 0.476 | 6.112 |
| 0.967  | 0.346 | 19.000 | 0.445 | 0.476 | 6.112 |
| 1.164  | 0.259 | 19.000 | 0.408 | 0.476 | 6.112 |
| -1.780 | 0.091 | 19.000 | 0.431 | 0.476 | 6.112 |
| -1.864 | 0.078 | 19.000 | 0.556 | 0.476 | 6.112 |
| 2.969  | 0.008 | 19.000 | 0.424 | 0.476 | 6.112 |
| -0.231 | 0.820 | 19.000 | 0.524 | 0.476 | 6.112 |
| 0.361  | 0.722 | 19.000 | 0.597 | 0.476 | 6.112 |
| -0.429 | 0.673 | 19.000 | 0.355 | 0.476 | 6.112 |
| 2.103  | 0.049 | 19.000 | 0.365 | 0.476 | 6.112 |
| 0.827  | 0.418 | 19.000 | 0.497 | 0.476 | 6.112 |
| 1.900  | 0.073 | 19.000 | 0.474 | 0.476 | 6.112 |
| 1.879  | 0.076 | 19.000 | 0.348 | 0.476 | 6.112 |
| -1.296 | 0.211 | 19.000 | 0.447 | 0.476 | 6.112 |
| 1.807  | 0.087 | 19.000 | 0.823 | 0.476 | 6.112 |
| 0.056  | 0.956 | 19.000 | 0.443 | 0.476 | 6.112 |
| 1.606  | 0.125 | 19.000 | 0.666 | 0.476 | 6.112 |
| -0.070 | 0.945 | 19.000 | 0.660 | 0.476 | 6.112 |
| 2.142  | 0.045 | 19.000 | 0.299 | 0.476 | 6.112 |
| 3.023  | 0.007 | 19.000 | 0.694 | 0.476 | 6.112 |
| 0.573  | 0.573 | 19.000 | 0.501 | 0.476 | 6.112 |
| 2.613  | 0.017 | 19.000 | 1.040 | 0.476 | 6.112 |
| 1.330  | 0.199 | 19.000 | 0.593 | 0.476 | 6.112 |
| 1.288  | 0.213 | 19.000 | 0.289 | 0.476 | 6.112 |
| 2.463  | 0.023 | 19.000 | 0.614 | 0.476 | 6.112 |
| 1.991  | 0.061 | 19.000 | 0.369 | 0.476 | 6.112 |
| -0.372 | 0.714 | 19.000 | 0.524 | 0.476 | 6.112 |
| -2.957 | 0.008 | 19.000 | 0.388 | 0.476 | 6.112 |
| -0.479 | 0.638 | 19.000 | 0.341 | 0.476 | 6.112 |
| 0.240  | 0.813 | 19.000 | 0.507 | 0.476 | 6.112 |
| 0.545  | 0.592 | 19.000 | 0.337 | 0.476 | 6.112 |
| -0.383 | 0.706 | 19.000 | 0.487 | 0.476 | 6.112 |
| -1.034 | 0.314 | 19.000 | 0.434 | 0.476 | 6.112 |
| 2.944  | 0.008 | 19.000 | 0.330 | 0.476 | 6.112 |
| 2.754  | 0.013 | 19.000 | 0.463 | 0.476 | 6.112 |
| -0.765 | 0.454 | 19.000 | 0.712 | 0.476 | 6.112 |
| -0.750 | 0.462 | 19.000 | 0.472 | 0.476 | 6.112 |
| -2.843 | 0.010 | 19.000 | 0.402 | 0.476 | 6.112 |
| -0.735 | 0.471 | 19.000 | 0.435 | 0.476 | 6.112 |
| -0.156 | 0.878 | 19.000 | 0.389 | 0.476 | 6.112 |
| 2.848  | 0.010 | 19.000 | 0.594 | 0.476 | 6.112 |
| 2.345  | 0.030 | 19.000 | 0.529 | 0.476 | 6.112 |
| -2.432 | 0.025 | 19.000 | 0.526 | 0.476 | 6.112 |

|        |       |        |       |       |       |
|--------|-------|--------|-------|-------|-------|
| -2.763 | 0.012 | 19.000 | 0.257 | 0.476 | 6.112 |
| 0.269  | 0.791 | 19.000 | 0.323 | 0.476 | 6.112 |
| 0.256  | 0.800 | 19.000 | 0.472 | 0.476 | 6.112 |
| 2.076  | 0.052 | 19.000 | 0.327 | 0.476 | 6.112 |
| -0.175 | 0.863 | 19.000 | 0.550 | 0.476 | 6.112 |
| 1.621  | 0.122 | 19.000 | 0.712 | 0.476 | 6.112 |
| 2.092  | 0.050 | 19.000 | 0.391 | 0.476 | 6.112 |
| -0.803 | 0.432 | 19.000 | 0.613 | 0.476 | 6.112 |
| 1.918  | 0.070 | 19.000 | 0.349 | 0.476 | 6.112 |
| -0.368 | 0.717 | 19.000 | 1.111 | 0.476 | 6.112 |
| 2.591  | 0.018 | 19.000 | 0.330 | 0.476 | 6.112 |
| -1.901 | 0.073 | 19.000 | 0.400 | 0.476 | 6.112 |
| 1.175  | 0.255 | 19.000 | 0.383 | 0.476 | 6.112 |
| 0.293  | 0.773 | 19.000 | 0.470 | 0.476 | 6.112 |
| -2.474 | 0.023 | 19.000 | 0.644 | 0.476 | 6.112 |
| 0.804  | 0.431 | 19.000 | 0.429 | 0.476 | 6.112 |
| -2.602 | 0.018 | 19.000 | 0.570 | 0.476 | 6.112 |
| -0.579 | 0.570 | 19.000 | 0.653 | 0.476 | 6.112 |
| 0.699  | 0.493 | 19.000 | 0.433 | 0.476 | 6.112 |
| -0.413 | 0.684 | 19.000 | 0.632 | 0.476 | 6.112 |
| 2.460  | 0.024 | 19.000 | 0.505 | 0.476 | 6.112 |
| 1.654  | 0.115 | 19.000 | 0.781 | 0.476 | 6.112 |
| -0.423 | 0.677 | 19.000 | 0.668 | 0.476 | 6.112 |
| 0.093  | 0.927 | 19.000 | 0.520 | 0.476 | 6.112 |
| 3.157  | 0.005 | 19.000 | 0.419 | 0.476 | 6.112 |
| -1.228 | 0.235 | 19.000 | 0.685 | 0.476 | 6.112 |
| -0.606 | 0.552 | 19.000 | 0.526 | 0.476 | 6.112 |
| -1.100 | 0.285 | 19.000 | 0.322 | 0.476 | 6.112 |
| -0.243 | 0.811 | 19.000 | 0.423 | 0.476 | 6.112 |
| -0.308 | 0.762 | 19.000 | 0.706 | 0.476 | 6.112 |
| 3.133  | 0.005 | 19.000 | 0.496 | 0.476 | 6.112 |
| 1.378  | 0.184 | 19.000 | 0.604 | 0.476 | 6.112 |
| -2.888 | 0.009 | 19.000 | 0.588 | 0.476 | 6.112 |
| 2.201  | 0.040 | 19.000 | 0.629 | 0.476 | 6.112 |
| -0.121 | 0.905 | 19.000 | 1.058 | 0.476 | 6.112 |
| 0.636  | 0.533 | 19.000 | 0.648 | 0.476 | 6.112 |
| 0.365  | 0.719 | 19.000 | 0.647 | 0.476 | 6.112 |
| 2.351  | 0.030 | 19.000 | 0.482 | 0.476 | 6.112 |
| -0.922 | 0.368 | 19.000 | 0.498 | 0.476 | 6.112 |
| 0.046  | 0.964 | 19.000 | 0.451 | 0.476 | 6.112 |
| 0.898  | 0.380 | 19.000 | 0.650 | 0.476 | 6.112 |
| 3.473  | 0.003 | 19.000 | 0.610 | 0.476 | 6.112 |
| 1.565  | 0.134 | 19.000 | 0.725 | 0.476 | 6.112 |
| 0.981  | 0.339 | 19.000 | 0.510 | 0.476 | 6.112 |
| 2.364  | 0.029 | 19.000 | 0.745 | 0.476 | 6.112 |
| -1.263 | 0.222 | 19.000 | 0.442 | 0.476 | 6.112 |
| -0.872 | 0.394 | 19.000 | 0.410 | 0.476 | 6.112 |
| 0.498  | 0.624 | 19.000 | 0.421 | 0.476 | 6.112 |
| -0.046 | 0.964 | 19.000 | 0.468 | 0.476 | 6.112 |
| 0.886  | 0.386 | 19.000 | 0.440 | 0.476 | 6.112 |

|        |       |        |       |       |       |
|--------|-------|--------|-------|-------|-------|
| 0.498  | 0.624 | 19.000 | 0.484 | 0.476 | 6.112 |
| 1.248  | 0.227 | 19.000 | 0.765 | 0.476 | 6.112 |
| 0.302  | 0.766 | 19.000 | 0.287 | 0.476 | 6.112 |
| 1.040  | 0.311 | 19.000 | 0.392 | 0.476 | 6.112 |
| -1.192 | 0.248 | 19.000 | 0.588 | 0.476 | 6.112 |
| -0.047 | 0.963 | 19.000 | 0.415 | 0.476 | 6.112 |
| 0.489  | 0.630 | 19.000 | 0.456 | 0.476 | 6.112 |
| -2.641 | 0.016 | 19.000 | 0.480 | 0.476 | 6.112 |
| 0.287  | 0.777 | 19.000 | 0.484 | 0.476 | 6.112 |
| -1.753 | 0.096 | 19.000 | 0.465 | 0.476 | 6.112 |
| -0.219 | 0.829 | 19.000 | 0.420 | 0.476 | 6.112 |
| 0.779  | 0.445 | 19.000 | 0.481 | 0.476 | 6.112 |
| -0.429 | 0.673 | 19.000 | 0.432 | 0.476 | 6.112 |
| -1.965 | 0.064 | 19.000 | 0.416 | 0.476 | 6.112 |
| -1.349 | 0.193 | 19.000 | 0.625 | 0.476 | 6.112 |
| 2.849  | 0.010 | 19.000 | 0.587 | 0.476 | 6.112 |
| -0.960 | 0.349 | 19.000 | 0.446 | 0.476 | 6.112 |
| -0.622 | 0.541 | 19.000 | 0.438 | 0.476 | 6.112 |
| 1.558  | 0.136 | 19.000 | 0.367 | 0.476 | 6.112 |
| -0.034 | 0.973 | 19.000 | 0.692 | 0.476 | 6.112 |
| 0.760  | 0.457 | 19.000 | 0.232 | 0.476 | 6.112 |
| 1.810  | 0.086 | 19.000 | 0.336 | 0.476 | 6.112 |
| -2.380 | 0.028 | 19.000 | 0.387 | 0.476 | 6.112 |
| 1.757  | 0.095 | 19.000 | 0.614 | 0.476 | 6.112 |
| -2.130 | 0.046 | 19.000 | 0.438 | 0.476 | 6.112 |
| 1.708  | 0.104 | 19.000 | 0.516 | 0.476 | 6.112 |
| 1.866  | 0.078 | 19.000 | 0.849 | 0.476 | 6.112 |
| -1.981 | 0.062 | 19.000 | 0.636 | 0.476 | 6.112 |
| 1.827  | 0.083 | 19.000 | 0.724 | 0.476 | 6.112 |
| -0.202 | 0.842 | 19.000 | 0.376 | 0.476 | 6.112 |
| 0.596  | 0.558 | 19.000 | 0.415 | 0.476 | 6.112 |
| 0.430  | 0.672 | 19.000 | 0.354 | 0.476 | 6.112 |
| 2.137  | 0.046 | 19.000 | 0.502 | 0.476 | 6.112 |
| -0.563 | 0.580 | 19.000 | 0.524 | 0.476 | 6.112 |
| 1.713  | 0.103 | 19.000 | 0.303 | 0.476 | 6.112 |
| 2.334  | 0.031 | 19.000 | 0.366 | 0.476 | 6.112 |
| 2.319  | 0.032 | 19.000 | 1.071 | 0.476 | 6.112 |
| 2.202  | 0.040 | 19.000 | 0.354 | 0.476 | 6.112 |
| 0.892  | 0.384 | 19.000 | 0.513 | 0.476 | 6.112 |
| 1.801  | 0.088 | 19.000 | 0.540 | 0.476 | 6.112 |
| 2.001  | 0.060 | 19.000 | 0.446 | 0.476 | 6.112 |
| 1.998  | 0.060 | 19.000 | 0.276 | 0.476 | 6.112 |
| -2.894 | 0.009 | 19.000 | 0.335 | 0.476 | 6.112 |
| -1.657 | 0.114 | 19.000 | 0.538 | 0.476 | 6.112 |
| 1.659  | 0.113 | 19.000 | 0.533 | 0.476 | 6.112 |
| 0.122  | 0.904 | 19.000 | 0.347 | 0.476 | 6.112 |
| 1.168  | 0.257 | 19.000 | 0.405 | 0.476 | 6.112 |
| 0.275  | 0.786 | 19.000 | 0.413 | 0.476 | 6.112 |
| 0.869  | 0.396 | 19.000 | 0.261 | 0.476 | 6.112 |
| 1.557  | 0.136 | 19.000 | 0.291 | 0.476 | 6.112 |

|        |       |        |       |       |       |
|--------|-------|--------|-------|-------|-------|
| 1.395  | 0.179 | 19.000 | 0.376 | 0.476 | 6.112 |
| -2.135 | 0.046 | 19.000 | 0.458 | 0.476 | 6.112 |
| 1.871  | 0.077 | 19.000 | 0.484 | 0.476 | 6.112 |
| 2.329  | 0.031 | 19.000 | 0.581 | 0.476 | 6.112 |
| 2.111  | 0.048 | 19.000 | 0.664 | 0.476 | 6.112 |
| 2.695  | 0.014 | 19.000 | 0.715 | 0.476 | 6.112 |
| 1.604  | 0.125 | 19.000 | 0.394 | 0.476 | 6.112 |
| 0.963  | 0.348 | 19.000 | 0.336 | 0.476 | 6.112 |
| 0.141  | 0.889 | 19.000 | 0.388 | 0.476 | 6.112 |
| -2.250 | 0.036 | 19.000 | 0.373 | 0.476 | 6.112 |
| 0.912  | 0.373 | 19.000 | 0.367 | 0.476 | 6.112 |
| 2.488  | 0.022 | 19.000 | 0.711 | 0.476 | 6.112 |
| 1.114  | 0.279 | 19.000 | 0.522 | 0.476 | 6.112 |
| 0.219  | 0.829 | 19.000 | 0.654 | 0.476 | 6.112 |
| -0.115 | 0.910 | 19.000 | 1.086 | 0.476 | 6.112 |
| 0.261  | 0.797 | 19.000 | 1.153 | 0.476 | 6.112 |
| -0.399 | 0.694 | 19.000 | 1.006 | 0.476 | 6.112 |
| -1.332 | 0.199 | 19.000 | 0.523 | 0.476 | 6.112 |
| -0.617 | 0.544 | 19.000 | 0.683 | 0.476 | 6.112 |
| -0.194 | 0.848 | 19.000 | 0.743 | 0.476 | 6.112 |
| -2.249 | 0.037 | 19.000 | 0.324 | 0.476 | 6.112 |
| -0.155 | 0.879 | 19.000 | 0.474 | 0.476 | 6.112 |
| -1.447 | 0.164 | 19.000 | 0.444 | 0.476 | 6.112 |
| 1.893  | 0.074 | 19.000 | 0.350 | 0.476 | 6.112 |
| 1.296  | 0.210 | 19.000 | 0.282 | 0.476 | 6.112 |
| -1.762 | 0.094 | 19.000 | 0.593 | 0.476 | 6.112 |
| -0.908 | 0.375 | 19.000 | 0.566 | 0.476 | 6.112 |
| 2.738  | 0.013 | 19.000 | 0.999 | 0.476 | 6.112 |
| 0.963  | 0.348 | 19.000 | 0.642 | 0.476 | 6.112 |
| 0.989  | 0.335 | 19.000 | 0.813 | 0.476 | 6.112 |
| 2.160  | 0.044 | 19.000 | 0.402 | 0.476 | 6.112 |
| -2.758 | 0.013 | 19.000 | 0.479 | 0.476 | 6.112 |
| -1.404 | 0.176 | 19.000 | 0.500 | 0.476 | 6.112 |
| 1.860  | 0.078 | 19.000 | 0.375 | 0.476 | 6.112 |
| 1.582  | 0.130 | 19.000 | 0.432 | 0.476 | 6.112 |
| -2.512 | 0.021 | 19.000 | 0.519 | 0.476 | 6.112 |
| 0.784  | 0.443 | 19.000 | 0.567 | 0.476 | 6.112 |
| -1.374 | 0.185 | 19.000 | 0.503 | 0.476 | 6.112 |
| 1.645  | 0.116 | 19.000 | 0.919 | 0.476 | 6.112 |
| 2.071  | 0.052 | 19.000 | 0.696 | 0.476 | 6.112 |
| 2.411  | 0.026 | 19.000 | 0.886 | 0.476 | 6.112 |
| -1.023 | 0.319 | 19.000 | 0.559 | 0.476 | 6.112 |
| 1.154  | 0.263 | 19.000 | 0.642 | 0.476 | 6.112 |
| -0.027 | 0.979 | 19.000 | 0.482 | 0.476 | 6.112 |
| 2.110  | 0.048 | 19.000 | 0.368 | 0.476 | 6.112 |
| 2.069  | 0.052 | 19.000 | 0.426 | 0.476 | 6.112 |
| -0.313 | 0.758 | 19.000 | 0.671 | 0.476 | 6.112 |
| 1.941  | 0.067 | 19.000 | 0.899 | 0.476 | 6.112 |
| -0.027 | 0.978 | 19.000 | 0.642 | 0.476 | 6.112 |
| -2.905 | 0.009 | 19.000 | 0.210 | 0.476 | 6.112 |



|        |       |        |       |       |       |
|--------|-------|--------|-------|-------|-------|
| -0.867 | 0.397 | 19.000 | 0.567 | 0.476 | 6.112 |
| -2.041 | 0.055 | 19.000 | 0.560 | 0.476 | 6.112 |
| -0.361 | 0.722 | 19.000 | 0.564 | 0.476 | 6.112 |
| 0.053  | 0.959 | 19.000 | 0.650 | 0.476 | 6.112 |
| -0.641 | 0.529 | 19.000 | 0.332 | 0.476 | 6.112 |
| 1.672  | 0.111 | 19.000 | 0.330 | 0.476 | 6.112 |
| 0.262  | 0.796 | 19.000 | 0.486 | 0.476 | 6.112 |
| 1.930  | 0.069 | 19.000 | 0.597 | 0.476 | 6.112 |
| 0.002  | 0.998 | 19.000 | 0.418 | 0.476 | 6.112 |
| 0.140  | 0.890 | 19.000 | 0.693 | 0.476 | 6.112 |
| 1.307  | 0.207 | 19.000 | 0.606 | 0.476 | 6.112 |
| 1.176  | 0.254 | 19.000 | 0.333 | 0.476 | 6.112 |
| -2.075 | 0.052 | 19.000 | 0.256 | 0.476 | 6.112 |
| 1.029  | 0.316 | 19.000 | 0.318 | 0.476 | 6.112 |
| 0.515  | 0.613 | 19.000 | 0.387 | 0.476 | 6.112 |
| 2.522  | 0.021 | 19.000 | 0.445 | 0.476 | 6.112 |
| -1.178 | 0.254 | 19.000 | 0.336 | 0.476 | 6.112 |
| 1.406  | 0.176 | 19.000 | 0.485 | 0.476 | 6.112 |
| -0.275 | 0.786 | 19.000 | 0.312 | 0.476 | 6.112 |
| 2.740  | 0.013 | 19.000 | 0.435 | 0.476 | 6.112 |
| 3.185  | 0.005 | 19.000 | 0.588 | 0.476 | 6.112 |
| -0.870 | 0.395 | 19.000 | 0.478 | 0.476 | 6.112 |
| -0.551 | 0.588 | 19.000 | 0.580 | 0.476 | 6.112 |
| -0.794 | 0.437 | 19.000 | 0.415 | 0.476 | 6.112 |
| -0.764 | 0.454 | 19.000 | 0.355 | 0.476 | 6.112 |
| -0.302 | 0.766 | 19.000 | 0.433 | 0.476 | 6.112 |
| -1.101 | 0.285 | 19.000 | 0.470 | 0.476 | 6.112 |
| 0.247  | 0.808 | 19.000 | 0.415 | 0.476 | 6.112 |
| -1.196 | 0.246 | 19.000 | 0.275 | 0.476 | 6.112 |
| 0.408  | 0.688 | 19.000 | 0.429 | 0.476 | 6.112 |
| 1.491  | 0.152 | 19.000 | 0.542 | 0.476 | 6.112 |
| -0.978 | 0.340 | 19.000 | 0.548 | 0.476 | 6.112 |
| 1.674  | 0.111 | 19.000 | 0.688 | 0.476 | 6.112 |
| 1.343  | 0.195 | 19.000 | 0.631 | 0.476 | 6.112 |
| -0.508 | 0.617 | 19.000 | 0.529 | 0.476 | 6.112 |
| -0.966 | 0.346 | 19.000 | 0.419 | 0.476 | 6.112 |
| -1.164 | 0.259 | 19.000 | 0.314 | 0.476 | 6.112 |
| 0.903  | 0.378 | 19.000 | 0.458 | 0.476 | 6.112 |
| 2.463  | 0.024 | 19.000 | 0.483 | 0.476 | 6.112 |
| -0.480 | 0.637 | 19.000 | 0.359 | 0.476 | 6.112 |
| 1.364  | 0.188 | 19.000 | 0.374 | 0.476 | 6.112 |
| -2.619 | 0.017 | 19.000 | 0.405 | 0.476 | 6.112 |
| -2.341 | 0.030 | 19.000 | 0.416 | 0.476 | 6.112 |
| 1.855  | 0.079 | 19.000 | 0.706 | 0.476 | 6.112 |
| 1.947  | 0.066 | 19.000 | 0.776 | 0.476 | 6.112 |
| -1.102 | 0.284 | 19.000 | 0.449 | 0.476 | 6.112 |
| 1.143  | 0.267 | 19.000 | 0.433 | 0.476 | 6.112 |
| -0.270 | 0.790 | 19.000 | 0.481 | 0.476 | 6.112 |
| 1.828  | 0.083 | 19.000 | 0.388 | 0.476 | 6.112 |
| 0.270  | 0.790 | 19.000 | 0.407 | 0.476 | 6.112 |

|        |       |        |       |       |       |
|--------|-------|--------|-------|-------|-------|
| -0.286 | 0.778 | 19.000 | 0.386 | 0.476 | 6.112 |
| -2.783 | 0.012 | 19.000 | 0.391 | 0.476 | 6.112 |
| -2.188 | 0.041 | 19.000 | 0.643 | 0.476 | 6.112 |
| 1.632  | 0.119 | 19.000 | 0.714 | 0.476 | 6.112 |
| 2.713  | 0.014 | 19.000 | 0.674 | 0.476 | 6.112 |
| 1.202  | 0.244 | 19.000 | 0.442 | 0.476 | 6.112 |
| 1.297  | 0.210 | 19.000 | 0.540 | 0.476 | 6.112 |
| -0.923 | 0.368 | 19.000 | 0.330 | 0.476 | 6.112 |
| -0.649 | 0.524 | 19.000 | 0.364 | 0.476 | 6.112 |
| 2.516  | 0.021 | 19.000 | 0.533 | 0.476 | 6.112 |
| -2.660 | 0.015 | 19.000 | 0.475 | 0.476 | 6.112 |
| -1.470 | 0.158 | 19.000 | 0.438 | 0.476 | 6.112 |
| 1.379  | 0.184 | 19.000 | 0.504 | 0.476 | 6.112 |
| -1.704 | 0.105 | 19.000 | 0.651 | 0.476 | 6.112 |
| -2.170 | 0.043 | 19.000 | 0.525 | 0.476 | 6.112 |
| 2.098  | 0.049 | 19.000 | 0.716 | 0.476 | 6.112 |
| 1.351  | 0.193 | 19.000 | 0.493 | 0.476 | 6.112 |
| -2.289 | 0.034 | 19.000 | 0.474 | 0.476 | 6.112 |
| -1.114 | 0.279 | 19.000 | 0.328 | 0.476 | 6.112 |
| -0.617 | 0.545 | 19.000 | 0.296 | 0.476 | 6.112 |
| 1.756  | 0.095 | 19.000 | 0.678 | 0.476 | 6.112 |
| 1.399  | 0.178 | 19.000 | 0.537 | 0.476 | 6.112 |
| 0.651  | 0.523 | 19.000 | 0.779 | 0.476 | 6.112 |
| 1.537  | 0.141 | 19.000 | 0.302 | 0.476 | 6.112 |
| -2.161 | 0.044 | 19.000 | 0.354 | 0.476 | 6.112 |
| 2.683  | 0.015 | 19.000 | 0.402 | 0.476 | 6.112 |
| -2.051 | 0.054 | 19.000 | 1.060 | 0.476 | 6.112 |
| -1.110 | 0.281 | 19.000 | 0.462 | 0.476 | 6.112 |
| -1.173 | 0.255 | 19.000 | 0.503 | 0.476 | 6.112 |
| 1.105  | 0.283 | 19.000 | 0.536 | 0.476 | 6.112 |
| 0.787  | 0.441 | 19.000 | 0.701 | 0.476 | 6.112 |
| 1.170  | 0.256 | 19.000 | 0.603 | 0.476 | 6.112 |
| 0.760  | 0.456 | 19.000 | 0.546 | 0.476 | 6.112 |
| 1.133  | 0.271 | 19.000 | 0.635 | 0.476 | 6.112 |
| -1.803 | 0.087 | 19.000 | 0.391 | 0.476 | 6.112 |
| 1.226  | 0.235 | 19.000 | 0.536 | 0.476 | 6.112 |
| -1.177 | 0.254 | 19.000 | 0.629 | 0.476 | 6.112 |
| 0.872  | 0.394 | 19.000 | 0.798 | 0.476 | 6.112 |
| 0.369  | 0.716 | 19.000 | 0.575 | 0.476 | 6.112 |
| 1.077  | 0.295 | 19.000 | 0.561 | 0.476 | 6.112 |
| 0.723  | 0.478 | 19.000 | 0.544 | 0.476 | 6.112 |
| 1.273  | 0.218 | 19.000 | 0.413 | 0.476 | 6.112 |
| 0.484  | 0.634 | 19.000 | 0.482 | 0.476 | 6.112 |
| 1.404  | 0.176 | 19.000 | 0.471 | 0.476 | 6.112 |
| 2.154  | 0.044 | 19.000 | 1.520 | 0.476 | 6.112 |
| -0.959 | 0.349 | 19.000 | 0.569 | 0.476 | 6.112 |
| -2.418 | 0.026 | 19.000 | 0.440 | 0.476 | 6.112 |
| -2.113 | 0.048 | 19.000 | 0.458 | 0.476 | 6.112 |
| -0.999 | 0.330 | 19.000 | 0.503 | 0.476 | 6.112 |
| 1.193  | 0.248 | 19.000 | 0.501 | 0.476 | 6.112 |

|        |       |        |       |       |       |
|--------|-------|--------|-------|-------|-------|
| 1.004  | 0.328 | 19.000 | 0.423 | 0.476 | 6.112 |
| 0.636  | 0.532 | 19.000 | 1.035 | 0.476 | 6.112 |
| 1.125  | 0.275 | 19.000 | 0.902 | 0.476 | 6.112 |
| 2.024  | 0.057 | 19.000 | 0.697 | 0.476 | 6.112 |
| 1.339  | 0.196 | 19.000 | 0.444 | 0.476 | 6.112 |
| -0.968 | 0.345 | 19.000 | 0.534 | 0.476 | 6.112 |
| 0.033  | 0.974 | 19.000 | 0.519 | 0.476 | 6.112 |
| 2.130  | 0.046 | 19.000 | 1.119 | 0.476 | 6.112 |
| 0.175  | 0.863 | 19.000 | 0.454 | 0.476 | 6.112 |
| -1.452 | 0.163 | 19.000 | 0.489 | 0.476 | 6.112 |
| -2.439 | 0.025 | 19.000 | 0.685 | 0.476 | 6.112 |
| 0.022  | 0.982 | 19.000 | 0.438 | 0.476 | 6.112 |
| -0.185 | 0.855 | 19.000 | 0.632 | 0.476 | 6.112 |
| -0.454 | 0.655 | 19.000 | 0.449 | 0.476 | 6.112 |
| 1.817  | 0.085 | 19.000 | 0.746 | 0.476 | 6.112 |
| -1.925 | 0.069 | 19.000 | 0.764 | 0.476 | 6.112 |
| -1.403 | 0.177 | 19.000 | 0.480 | 0.476 | 6.112 |
| 2.467  | 0.023 | 19.000 | 1.473 | 0.476 | 6.112 |
| 2.131  | 0.046 | 19.000 | 0.776 | 0.476 | 6.112 |
| 2.952  | 0.008 | 19.000 | 0.239 | 0.476 | 6.112 |
| 1.590  | 0.128 | 19.000 | 0.452 | 0.476 | 6.112 |
| -0.158 | 0.876 | 19.000 | 0.427 | 0.476 | 6.112 |
| 2.038  | 0.056 | 19.000 | 0.475 | 0.476 | 6.112 |
| -2.430 | 0.025 | 19.000 | 0.482 | 0.476 | 6.112 |
| 1.583  | 0.130 | 19.000 | 0.896 | 0.476 | 6.112 |
| 1.050  | 0.307 | 19.000 | 0.509 | 0.476 | 6.112 |
| 2.668  | 0.015 | 19.000 | 0.274 | 0.476 | 6.112 |
| 0.212  | 0.834 | 19.000 | 0.435 | 0.476 | 6.112 |
| 2.341  | 0.030 | 19.000 | 0.771 | 0.476 | 6.112 |
| -0.516 | 0.612 | 19.000 | 0.462 | 0.476 | 6.112 |
| -2.210 | 0.040 | 19.000 | 0.277 | 0.476 | 6.112 |
| 0.674  | 0.509 | 19.000 | 0.490 | 0.476 | 6.112 |
| -1.800 | 0.088 | 19.000 | 0.407 | 0.476 | 6.112 |
| -0.006 | 0.995 | 19.000 | 0.380 | 0.476 | 6.112 |
| 1.590  | 0.128 | 19.000 | 0.388 | 0.476 | 6.112 |
| -1.547 | 0.138 | 19.000 | 0.368 | 0.476 | 6.112 |
| -2.411 | 0.026 | 19.000 | 0.404 | 0.476 | 6.112 |
| -1.372 | 0.186 | 19.000 | 0.292 | 0.476 | 6.112 |
| -1.336 | 0.197 | 19.000 | 0.507 | 0.476 | 6.112 |
| -1.123 | 0.275 | 19.000 | 0.434 | 0.476 | 6.112 |
| 1.566  | 0.134 | 19.000 | 0.656 | 0.476 | 6.112 |
| -1.065 | 0.300 | 19.000 | 0.713 | 0.476 | 6.112 |
| -2.878 | 0.010 | 19.000 | 0.316 | 0.476 | 6.112 |
| 0.414  | 0.684 | 19.000 | 0.438 | 0.476 | 6.112 |
| 2.977  | 0.008 | 19.000 | 0.547 | 0.476 | 6.112 |
| 1.664  | 0.112 | 19.000 | 0.485 | 0.476 | 6.112 |
| -2.345 | 0.030 | 19.000 | 0.388 | 0.476 | 6.112 |
| -0.705 | 0.489 | 19.000 | 0.661 | 0.476 | 6.112 |
| -0.719 | 0.481 | 19.000 | 0.704 | 0.476 | 6.112 |
| 0.426  | 0.675 | 19.000 | 0.379 | 0.476 | 6.112 |

|        |       |        |       |       |       |
|--------|-------|--------|-------|-------|-------|
| 2.327  | 0.031 | 19.000 | 0.279 | 0.476 | 6.112 |
| -1.154 | 0.263 | 19.000 | 0.348 | 0.476 | 6.112 |
| -1.856 | 0.079 | 19.000 | 0.210 | 0.476 | 6.112 |
| -2.141 | 0.045 | 19.000 | 0.499 | 0.476 | 6.112 |
| -1.925 | 0.069 | 19.000 | 0.486 | 0.476 | 6.112 |
| -0.460 | 0.651 | 19.000 | 0.467 | 0.476 | 6.112 |
| 1.350  | 0.193 | 19.000 | 0.403 | 0.476 | 6.112 |
| 1.438  | 0.167 | 19.000 | 0.387 | 0.476 | 6.112 |
| 1.409  | 0.175 | 19.000 | 0.404 | 0.476 | 6.112 |
| 1.390  | 0.180 | 19.000 | 0.387 | 0.476 | 6.112 |
| 1.357  | 0.191 | 19.000 | 0.391 | 0.476 | 6.112 |
| 1.327  | 0.200 | 19.000 | 0.382 | 0.476 | 6.112 |
| 1.293  | 0.212 | 19.000 | 0.398 | 0.476 | 6.112 |
| 2.066  | 0.053 | 19.000 | 1.351 | 0.476 | 6.112 |
| -3.592 | 0.002 | 19.000 | 0.338 | 0.476 | 6.112 |
| 2.343  | 0.030 | 19.000 | 1.461 | 0.476 | 6.112 |
| 2.661  | 0.015 | 19.000 | 0.696 | 0.476 | 6.112 |
| 2.113  | 0.048 | 19.000 | 0.909 | 0.476 | 6.112 |
| 2.366  | 0.029 | 19.000 | 1.331 | 0.476 | 6.112 |
| 2.846  | 0.010 | 19.000 | 1.150 | 0.476 | 6.112 |
| 1.834  | 0.082 | 19.000 | 0.520 | 0.476 | 6.112 |
| 2.823  | 0.011 | 19.000 | 1.421 | 0.476 | 6.112 |
| 2.165  | 0.043 | 19.000 | 0.534 | 0.476 | 6.112 |
| 2.984  | 0.008 | 19.000 | 1.201 | 0.476 | 6.112 |
| 1.481  | 0.155 | 19.000 | 0.531 | 0.476 | 6.112 |
| 0.292  | 0.774 | 19.000 | 0.497 | 0.476 | 6.112 |
| 1.677  | 0.110 | 19.000 | 1.492 | 0.476 | 6.112 |
| 3.612  | 0.002 | 19.000 | 0.584 | 0.476 | 6.112 |
| 0.387  | 0.703 | 19.000 | 1.089 | 0.476 | 6.112 |
| 2.349  | 0.030 | 19.000 | 0.836 | 0.476 | 6.112 |
| 1.820  | 0.084 | 19.000 | 1.207 | 0.476 | 6.112 |
| 1.299  | 0.210 | 19.000 | 1.060 | 0.476 | 6.112 |
| 2.614  | 0.017 | 19.000 | 0.684 | 0.476 | 6.112 |
| -0.771 | 0.450 | 19.000 | 1.040 | 0.476 | 6.112 |
| -0.951 | 0.354 | 19.000 | 0.591 | 0.476 | 6.112 |
| -1.764 | 0.094 | 19.000 | 0.550 | 0.476 | 6.112 |
| 1.592  | 0.128 | 19.000 | 0.341 | 0.476 | 6.112 |
| -0.790 | 0.440 | 19.000 | 0.456 | 0.476 | 6.112 |
| 0.799  | 0.434 | 19.000 | 0.440 | 0.476 | 6.112 |
| 2.227  | 0.038 | 19.000 | 0.387 | 0.476 | 6.112 |
| 1.692  | 0.107 | 19.000 | 0.439 | 0.476 | 6.112 |
| -1.768 | 0.093 | 19.000 | 0.805 | 0.476 | 6.112 |
| 2.001  | 0.060 | 19.000 | 0.569 | 0.476 | 6.112 |
| 1.221  | 0.237 | 19.000 | 0.462 | 0.476 | 6.112 |
| -0.392 | 0.699 | 19.000 | 0.420 | 0.476 | 6.112 |
| -1.207 | 0.242 | 19.000 | 0.624 | 0.476 | 6.112 |
| -2.573 | 0.019 | 19.000 | 0.414 | 0.476 | 6.112 |
| 2.026  | 0.057 | 19.000 | 0.826 | 0.476 | 6.112 |
| 2.337  | 0.031 | 19.000 | 0.696 | 0.476 | 6.112 |
| -1.700 | 0.105 | 19.000 | 0.410 | 0.476 | 6.112 |

|        |       |        |       |       |       |
|--------|-------|--------|-------|-------|-------|
| -2.156 | 0.044 | 19.000 | 0.431 | 0.476 | 6.112 |
| -1.600 | 0.126 | 19.000 | 0.679 | 0.476 | 6.112 |
| 2.093  | 0.050 | 19.000 | 0.844 | 0.476 | 6.112 |
| -1.595 | 0.127 | 19.000 | 0.791 | 0.476 | 6.112 |
| -0.817 | 0.424 | 19.000 | 0.620 | 0.476 | 6.112 |
| 0.508  | 0.617 | 19.000 | 0.238 | 0.476 | 6.112 |
| 2.227  | 0.038 | 19.000 | 0.442 | 0.476 | 6.112 |
| 1.435  | 0.168 | 19.000 | 0.619 | 0.476 | 6.112 |
| -0.393 | 0.698 | 19.000 | 0.378 | 0.476 | 6.112 |
| 0.715  | 0.483 | 19.000 | 0.534 | 0.476 | 6.112 |
| -0.629 | 0.537 | 19.000 | 0.405 | 0.476 | 6.112 |
| 1.230  | 0.234 | 19.000 | 0.572 | 0.476 | 6.112 |
| 2.042  | 0.055 | 19.000 | 0.352 | 0.476 | 6.112 |
| 0.853  | 0.404 | 19.000 | 0.293 | 0.476 | 6.112 |
| -0.530 | 0.602 | 19.000 | 0.440 | 0.476 | 6.112 |
| 0.964  | 0.347 | 19.000 | 0.654 | 0.476 | 6.112 |
| 0.574  | 0.573 | 19.000 | 0.887 | 0.476 | 6.112 |
| 0.254  | 0.803 | 19.000 | 1.048 | 0.476 | 6.112 |
| -2.536 | 0.020 | 19.000 | 0.603 | 0.476 | 6.112 |
| -0.119 | 0.906 | 19.000 | 0.871 | 0.476 | 6.112 |
| -0.515 | 0.612 | 19.000 | 0.386 | 0.476 | 6.112 |
| -0.281 | 0.782 | 19.000 | 0.525 | 0.476 | 6.112 |
| 2.955  | 0.008 | 19.000 | 0.255 | 0.476 | 6.112 |
| 2.093  | 0.050 | 19.000 | 0.408 | 0.476 | 6.112 |
| 2.506  | 0.021 | 19.000 | 0.385 | 0.476 | 6.112 |
| 3.953  | 0.001 | 19.000 | 0.831 | 0.476 | 6.112 |
| 0.709  | 0.487 | 19.000 | 0.308 | 0.476 | 6.112 |
| 2.147  | 0.045 | 19.000 | 0.406 | 0.476 | 6.112 |
| 2.767  | 0.012 | 19.000 | 1.700 | 0.476 | 6.112 |
| 1.997  | 0.060 | 19.000 | 0.418 | 0.476 | 6.112 |
| 1.931  | 0.068 | 19.000 | 0.729 | 0.476 | 6.112 |
| 0.857  | 0.402 | 19.000 | 0.367 | 0.476 | 6.112 |
| -2.752 | 0.013 | 19.000 | 0.295 | 0.476 | 6.112 |
| -0.112 | 0.912 | 19.000 | 0.362 | 0.476 | 6.112 |
| -1.425 | 0.170 | 19.000 | 0.415 | 0.476 | 6.112 |
| 0.091  | 0.929 | 19.000 | 0.595 | 0.476 | 6.112 |
| 1.015  | 0.323 | 19.000 | 0.567 | 0.476 | 6.112 |
| 1.349  | 0.193 | 19.000 | 0.422 | 0.476 | 6.112 |
| -1.202 | 0.244 | 19.000 | 0.358 | 0.476 | 6.112 |
| -1.346 | 0.194 | 19.000 | 0.478 | 0.476 | 6.112 |
| 1.591  | 0.128 | 19.000 | 0.513 | 0.476 | 6.112 |
| -1.481 | 0.155 | 19.000 | 0.429 | 0.476 | 6.112 |
| -0.034 | 0.973 | 19.000 | 0.411 | 0.476 | 6.112 |
| 2.716  | 0.014 | 19.000 | 0.395 | 0.476 | 6.112 |
| 1.139  | 0.269 | 19.000 | 0.457 | 0.476 | 6.112 |
| -0.773 | 0.449 | 19.000 | 0.605 | 0.476 | 6.112 |
| 0.997  | 0.331 | 19.000 | 0.281 | 0.476 | 6.112 |
| 1.481  | 0.155 | 19.000 | 0.686 | 0.476 | 6.112 |
| 2.265  | 0.035 | 19.000 | 0.518 | 0.476 | 6.112 |
| 1.925  | 0.069 | 19.000 | 0.567 | 0.476 | 6.112 |

|        |       |        |       |       |       |
|--------|-------|--------|-------|-------|-------|
| 0.237  | 0.815 | 19.000 | 0.586 | 0.476 | 6.112 |
| 0.169  | 0.867 | 19.000 | 0.490 | 0.476 | 6.112 |
| 2.619  | 0.017 | 19.000 | 0.928 | 0.476 | 6.112 |
| 1.220  | 0.237 | 19.000 | 0.289 | 0.476 | 6.112 |
| 3.143  | 0.005 | 19.000 | 0.410 | 0.476 | 6.112 |
| 2.892  | 0.009 | 19.000 | 0.282 | 0.476 | 6.112 |
| -0.778 | 0.446 | 19.000 | 0.500 | 0.476 | 6.112 |
| 0.860  | 0.401 | 19.000 | 0.723 | 0.476 | 6.112 |
| 1.304  | 0.208 | 19.000 | 0.503 | 0.476 | 6.112 |
| 2.167  | 0.043 | 19.000 | 0.328 | 0.476 | 6.112 |
| 0.943  | 0.357 | 19.000 | 0.417 | 0.476 | 6.112 |
| -2.879 | 0.010 | 19.000 | 0.338 | 0.476 | 6.112 |
| -0.985 | 0.337 | 19.000 | 0.464 | 0.476 | 6.112 |
| -0.428 | 0.674 | 19.000 | 0.456 | 0.476 | 6.112 |
| 0.044  | 0.965 | 19.000 | 0.570 | 0.476 | 6.112 |
| -0.242 | 0.811 | 19.000 | 0.561 | 0.476 | 6.112 |
| -1.360 | 0.190 | 19.000 | 0.399 | 0.476 | 6.112 |
| -0.120 | 0.906 | 19.000 | 0.607 | 0.476 | 6.112 |
| 1.439  | 0.167 | 19.000 | 0.378 | 0.476 | 6.112 |
| -1.086 | 0.291 | 19.000 | 0.578 | 0.476 | 6.112 |
| 0.091  | 0.928 | 19.000 | 0.499 | 0.476 | 6.112 |
| -2.539 | 0.020 | 19.000 | 0.838 | 0.476 | 6.112 |
| 0.979  | 0.340 | 19.000 | 0.878 | 0.476 | 6.112 |
| 1.391  | 0.180 | 19.000 | 1.103 | 0.476 | 6.112 |
| 1.347  | 0.194 | 19.000 | 0.532 | 0.476 | 6.112 |
| -3.577 | 0.002 | 19.000 | 0.602 | 0.476 | 6.112 |
| -0.376 | 0.711 | 19.000 | 0.800 | 0.476 | 6.112 |
| 0.699  | 0.493 | 19.000 | 0.517 | 0.476 | 6.112 |
| -1.023 | 0.319 | 19.000 | 0.460 | 0.476 | 6.112 |
| 0.710  | 0.486 | 19.000 | 0.524 | 0.476 | 6.112 |
| -0.107 | 0.916 | 19.000 | 0.523 | 0.476 | 6.112 |
| 0.563  | 0.580 | 19.000 | 0.456 | 0.476 | 6.112 |
| 2.908  | 0.009 | 19.000 | 0.501 | 0.476 | 6.112 |
| 1.780  | 0.091 | 19.000 | 0.285 | 0.476 | 6.112 |
| 2.575  | 0.019 | 19.000 | 0.533 | 0.476 | 6.112 |
| -2.063 | 0.053 | 19.000 | 0.751 | 0.476 | 6.112 |
| 0.338  | 0.739 | 19.000 | 0.434 | 0.476 | 6.112 |
| 1.288  | 0.213 | 19.000 | 0.310 | 0.476 | 6.112 |
| -1.620 | 0.122 | 19.000 | 0.419 | 0.476 | 6.112 |
| -0.096 | 0.925 | 19.000 | 0.463 | 0.476 | 6.112 |
| 1.128  | 0.273 | 19.000 | 0.564 | 0.476 | 6.112 |
| -1.695 | 0.106 | 19.000 | 0.648 | 0.476 | 6.112 |
| -0.843 | 0.410 | 19.000 | 0.605 | 0.476 | 6.112 |
| -1.809 | 0.086 | 19.000 | 0.486 | 0.476 | 6.112 |
| 2.885  | 0.009 | 19.000 | 0.411 | 0.476 | 6.112 |
| -1.548 | 0.138 | 19.000 | 0.416 | 0.476 | 6.112 |
| 2.478  | 0.023 | 19.000 | 0.882 | 0.476 | 6.112 |
| -1.359 | 0.190 | 19.000 | 1.734 | 0.476 | 6.112 |
| 0.922  | 0.368 | 19.000 | 0.932 | 0.476 | 6.112 |
| 1.954  | 0.066 | 19.000 | 1.371 | 0.476 | 6.112 |

|        |       |        |       |       |       |
|--------|-------|--------|-------|-------|-------|
| 2.096  | 0.050 | 19.000 | 0.933 | 0.476 | 6.112 |
| 0.586  | 0.565 | 19.000 | 0.669 | 0.476 | 6.112 |
| 2.092  | 0.050 | 19.000 | 0.325 | 0.476 | 6.112 |
| 2.730  | 0.013 | 19.000 | 0.532 | 0.476 | 6.112 |
| 1.569  | 0.133 | 19.000 | 0.890 | 0.476 | 6.112 |
| 2.272  | 0.035 | 19.000 | 0.672 | 0.476 | 6.112 |
| -3.099 | 0.006 | 19.000 | 0.662 | 0.476 | 6.112 |
| -2.766 | 0.012 | 19.000 | 0.241 | 0.476 | 6.112 |
| -1.297 | 0.210 | 19.000 | 0.472 | 0.476 | 6.112 |
| 1.752  | 0.096 | 19.000 | 0.419 | 0.476 | 6.112 |
| -1.396 | 0.179 | 19.000 | 0.539 | 0.476 | 6.112 |
| 0.344  | 0.735 | 19.000 | 0.803 | 0.476 | 6.112 |
| -2.053 | 0.054 | 19.000 | 0.322 | 0.476 | 6.112 |
| -0.599 | 0.556 | 19.000 | 0.780 | 0.476 | 6.112 |
| -0.725 | 0.477 | 19.000 | 0.521 | 0.476 | 6.112 |
| -2.252 | 0.036 | 19.000 | 0.665 | 0.476 | 6.112 |
| 2.057  | 0.054 | 19.000 | 0.256 | 0.476 | 6.112 |
| -0.894 | 0.383 | 19.000 | 0.307 | 0.476 | 6.112 |
| -1.565 | 0.134 | 19.000 | 0.375 | 0.476 | 6.112 |
| 0.247  | 0.808 | 19.000 | 0.572 | 0.476 | 6.112 |
| 0.932  | 0.363 | 19.000 | 0.642 | 0.476 | 6.112 |
| -0.935 | 0.361 | 19.000 | 0.336 | 0.476 | 6.112 |
| 2.497  | 0.022 | 19.000 | 0.362 | 0.476 | 6.112 |
| 1.535  | 0.141 | 19.000 | 0.739 | 0.476 | 6.112 |
| 1.016  | 0.322 | 19.000 | 0.266 | 0.476 | 6.112 |
| 0.700  | 0.492 | 19.000 | 0.447 | 0.476 | 6.112 |
| 0.628  | 0.538 | 19.000 | 0.363 | 0.476 | 6.112 |
| 2.020  | 0.058 | 19.000 | 0.807 | 0.476 | 6.112 |
| 1.961  | 0.065 | 19.000 | 0.424 | 0.476 | 6.112 |
| -1.856 | 0.079 | 19.000 | 0.416 | 0.476 | 6.112 |
| 1.722  | 0.101 | 19.000 | 0.684 | 0.476 | 6.112 |
| 0.773  | 0.449 | 19.000 | 0.419 | 0.476 | 6.112 |
| 1.600  | 0.126 | 19.000 | 0.958 | 0.476 | 6.112 |
| 0.520  | 0.609 | 19.000 | 0.492 | 0.476 | 6.112 |
| -0.909 | 0.375 | 19.000 | 0.444 | 0.476 | 6.112 |
| 0.252  | 0.804 | 19.000 | 0.494 | 0.476 | 6.112 |
| 1.247  | 0.227 | 19.000 | 0.346 | 0.476 | 6.112 |
| 0.029  | 0.977 | 19.000 | 0.520 | 0.476 | 6.112 |
| 3.046  | 0.007 | 19.000 | 0.408 | 0.476 | 6.112 |
| 1.646  | 0.116 | 19.000 | 0.312 | 0.476 | 6.112 |
| 2.074  | 0.052 | 19.000 | 0.298 | 0.476 | 6.112 |
| 0.728  | 0.475 | 19.000 | 0.371 | 0.476 | 6.112 |
| 1.616  | 0.123 | 19.000 | 0.572 | 0.476 | 6.112 |
| -0.326 | 0.748 | 19.000 | 0.482 | 0.476 | 6.112 |
| -0.023 | 0.982 | 19.000 | 0.491 | 0.476 | 6.112 |
| 1.648  | 0.116 | 19.000 | 0.792 | 0.476 | 6.112 |
| 0.024  | 0.981 | 19.000 | 0.358 | 0.476 | 6.112 |
| 0.007  | 0.995 | 19.000 | 0.378 | 0.476 | 6.112 |
| 2.142  | 0.045 | 19.000 | 0.558 | 0.476 | 6.112 |
| 1.642  | 0.117 | 19.000 | 0.623 | 0.476 | 6.112 |

|        |       |        |       |       |       |
|--------|-------|--------|-------|-------|-------|
| 0.585  | 0.565 | 19.000 | 0.339 | 0.476 | 6.112 |
| 0.460  | 0.651 | 19.000 | 0.350 | 0.476 | 6.112 |
| -1.209 | 0.241 | 19.000 | 0.434 | 0.476 | 6.112 |
| -1.495 | 0.151 | 19.000 | 0.520 | 0.476 | 6.112 |
| -0.984 | 0.338 | 19.000 | 0.602 | 0.476 | 6.112 |
| -1.360 | 0.190 | 19.000 | 0.359 | 0.476 | 6.112 |
| -1.905 | 0.072 | 19.000 | 0.422 | 0.476 | 6.112 |
| -2.515 | 0.021 | 19.000 | 0.363 | 0.476 | 6.112 |
| -2.264 | 0.035 | 19.000 | 0.379 | 0.476 | 6.112 |
| 0.216  | 0.831 | 19.000 | 0.621 | 0.476 | 6.112 |
| -0.411 | 0.686 | 19.000 | 0.289 | 0.476 | 6.112 |
| 1.253  | 0.225 | 19.000 | 0.339 | 0.476 | 6.112 |
| 2.374  | 0.028 | 19.000 | 0.292 | 0.476 | 6.112 |
| 0.179  | 0.860 | 19.000 | 0.401 | 0.476 | 6.112 |
| 1.739  | 0.098 | 19.000 | 0.538 | 0.476 | 6.112 |
| 3.071  | 0.006 | 19.000 | 0.236 | 0.476 | 6.112 |
| -0.921 | 0.369 | 19.000 | 0.363 | 0.476 | 6.112 |
| -0.158 | 0.876 | 19.000 | 0.288 | 0.476 | 6.112 |
| 3.325  | 0.004 | 19.000 | 0.265 | 0.476 | 6.112 |
| 0.277  | 0.785 | 19.000 | 0.323 | 0.476 | 6.112 |
| 1.010  | 0.325 | 19.000 | 0.416 | 0.476 | 6.112 |
| 0.035  | 0.973 | 19.000 | 0.349 | 0.476 | 6.112 |
| 0.578  | 0.570 | 19.000 | 0.559 | 0.476 | 6.112 |
| -0.884 | 0.388 | 19.000 | 0.307 | 0.476 | 6.112 |
| 0.498  | 0.624 | 19.000 | 0.412 | 0.476 | 6.112 |
| -0.902 | 0.378 | 19.000 | 0.461 | 0.476 | 6.112 |
| 0.403  | 0.691 | 19.000 | 0.421 | 0.476 | 6.112 |
| -1.025 | 0.318 | 19.000 | 0.743 | 0.476 | 6.112 |
| 1.480  | 0.155 | 19.000 | 0.385 | 0.476 | 6.112 |
| 2.065  | 0.053 | 19.000 | 0.436 | 0.476 | 6.112 |
| -1.800 | 0.088 | 19.000 | 0.962 | 0.476 | 6.112 |
| 1.048  | 0.308 | 19.000 | 0.532 | 0.476 | 6.112 |
| -0.546 | 0.591 | 19.000 | 0.789 | 0.476 | 6.112 |
| -0.673 | 0.509 | 19.000 | 0.434 | 0.476 | 6.112 |
| -1.002 | 0.329 | 19.000 | 0.301 | 0.476 | 6.112 |
| 2.695  | 0.014 | 19.000 | 0.258 | 0.476 | 6.112 |
| 1.771  | 0.093 | 19.000 | 0.762 | 0.476 | 6.112 |
| 0.940  | 0.359 | 19.000 | 0.387 | 0.476 | 6.112 |
| -1.481 | 0.155 | 19.000 | 0.407 | 0.476 | 6.112 |
| 0.174  | 0.864 | 19.000 | 0.494 | 0.476 | 6.112 |
| -0.895 | 0.382 | 19.000 | 0.453 | 0.476 | 6.112 |
| 0.028  | 0.978 | 19.000 | 0.410 | 0.476 | 6.112 |
| 0.860  | 0.401 | 19.000 | 0.351 | 0.476 | 6.112 |
| -1.437 | 0.167 | 19.000 | 0.320 | 0.476 | 6.112 |
| 0.887  | 0.386 | 19.000 | 0.541 | 0.476 | 6.112 |
| 0.232  | 0.819 | 19.000 | 0.628 | 0.476 | 6.112 |
| 4.329  | 0.000 | 19.000 | 0.463 | 0.476 | 6.112 |
| 0.851  | 0.406 | 19.000 | 0.642 | 0.476 | 6.112 |
| 2.071  | 0.052 | 19.000 | 0.521 | 0.476 | 6.112 |
| 1.577  | 0.131 | 19.000 | 0.706 | 0.476 | 6.112 |



|        |       |        |       |       |       |
|--------|-------|--------|-------|-------|-------|
| 2.158  | 0.044 | 19.000 | 0.705 | 0.476 | 6.112 |
| -2.056 | 0.054 | 19.000 | 0.661 | 0.476 | 6.112 |
| 1.833  | 0.083 | 19.000 | 0.472 | 0.476 | 6.112 |
| 3.400  | 0.003 | 19.000 | 0.328 | 0.476 | 6.112 |
| 0.930  | 0.364 | 19.000 | 0.389 | 0.476 | 6.112 |
| 0.424  | 0.676 | 19.000 | 0.945 | 0.476 | 6.112 |
| -0.224 | 0.825 | 19.000 | 0.517 | 0.476 | 6.112 |
| 1.869  | 0.077 | 19.000 | 0.707 | 0.476 | 6.112 |
| 2.838  | 0.011 | 19.000 | 1.326 | 0.476 | 6.112 |
| 1.166  | 0.258 | 19.000 | 0.977 | 0.476 | 6.112 |
| 1.382  | 0.183 | 19.000 | 0.517 | 0.476 | 6.112 |
| -2.681 | 0.015 | 19.000 | 0.718 | 0.476 | 6.112 |
| -2.800 | 0.011 | 19.000 | 0.760 | 0.476 | 6.112 |
| -1.179 | 0.253 | 19.000 | 0.521 | 0.476 | 6.112 |
| 1.477  | 0.156 | 19.000 | 0.580 | 0.476 | 6.112 |
| 2.352  | 0.030 | 19.000 | 0.428 | 0.476 | 6.112 |
| -0.088 | 0.931 | 19.000 | 0.435 | 0.476 | 6.112 |
| 0.842  | 0.410 | 19.000 | 0.330 | 0.476 | 6.112 |
| 0.641  | 0.529 | 19.000 | 0.478 | 0.476 | 6.112 |
| 2.494  | 0.022 | 19.000 | 0.534 | 0.476 | 6.112 |
| -1.990 | 0.061 | 19.000 | 0.620 | 0.476 | 6.112 |
| 2.828  | 0.011 | 19.000 | 0.881 | 0.476 | 6.112 |
| -1.042 | 0.311 | 19.000 | 0.642 | 0.476 | 6.112 |
| 1.436  | 0.167 | 19.000 | 1.028 | 0.476 | 6.112 |
| 1.483  | 0.155 | 19.000 | 0.673 | 0.476 | 6.112 |
| -1.318 | 0.203 | 19.000 | 0.521 | 0.476 | 6.112 |
| 1.504  | 0.149 | 19.000 | 0.935 | 0.476 | 6.112 |
| 1.597  | 0.127 | 19.000 | 0.431 | 0.476 | 6.112 |
| 0.929  | 0.365 | 19.000 | 0.486 | 0.476 | 6.112 |
| 0.371  | 0.715 | 19.000 | 0.619 | 0.476 | 6.112 |
| -2.370 | 0.029 | 19.000 | 0.390 | 0.476 | 6.112 |
| 1.011  | 0.325 | 19.000 | 0.692 | 0.476 | 6.112 |
| -2.274 | 0.035 | 19.000 | 0.376 | 0.476 | 6.112 |
| -0.451 | 0.657 | 19.000 | 0.441 | 0.476 | 6.112 |
| -1.482 | 0.155 | 19.000 | 0.324 | 0.476 | 6.112 |
| -1.599 | 0.126 | 19.000 | 0.336 | 0.476 | 6.112 |
| 1.644  | 0.117 | 19.000 | 0.735 | 0.476 | 6.112 |
| 0.177  | 0.862 | 19.000 | 0.573 | 0.476 | 6.112 |
| 1.691  | 0.107 | 19.000 | 0.591 | 0.476 | 6.112 |
| -1.488 | 0.153 | 19.000 | 0.483 | 0.476 | 6.112 |
| -1.566 | 0.134 | 19.000 | 0.734 | 0.476 | 6.112 |
| 2.359  | 0.029 | 19.000 | 0.411 | 0.476 | 6.112 |
| 1.762  | 0.094 | 19.000 | 0.687 | 0.476 | 6.112 |
| -1.868 | 0.077 | 19.000 | 0.545 | 0.476 | 6.112 |
| -2.600 | 0.018 | 19.000 | 0.632 | 0.476 | 6.112 |
| 1.683  | 0.109 | 19.000 | 0.645 | 0.476 | 6.112 |
| 1.648  | 0.116 | 19.000 | 0.519 | 0.476 | 6.112 |
| -0.296 | 0.770 | 19.000 | 0.967 | 0.476 | 6.112 |
| 2.000  | 0.060 | 19.000 | 0.840 | 0.476 | 6.112 |
| 2.559  | 0.019 | 19.000 | 0.530 | 0.476 | 6.112 |

|        |       |        |       |       |       |
|--------|-------|--------|-------|-------|-------|
| 2.521  | 0.021 | 19.000 | 0.470 | 0.476 | 6.112 |
| 0.874  | 0.393 | 19.000 | 0.329 | 0.476 | 6.112 |
| -0.578 | 0.570 | 19.000 | 0.370 | 0.476 | 6.112 |
| 1.682  | 0.109 | 19.000 | 0.730 | 0.476 | 6.112 |
| 1.817  | 0.085 | 19.000 | 0.656 | 0.476 | 6.112 |
| 1.169  | 0.257 | 19.000 | 0.368 | 0.476 | 6.112 |
| 2.337  | 0.031 | 19.000 | 0.415 | 0.476 | 6.112 |
| 1.681  | 0.109 | 19.000 | 1.528 | 0.476 | 6.112 |
| 2.556  | 0.019 | 19.000 | 1.084 | 0.476 | 6.112 |
| 2.212  | 0.039 | 19.000 | 1.276 | 0.476 | 6.112 |
| 2.468  | 0.023 | 19.000 | 0.494 | 0.476 | 6.112 |
| 1.665  | 0.112 | 19.000 | 0.450 | 0.476 | 6.112 |
| 0.455  | 0.654 | 19.000 | 0.450 | 0.476 | 6.112 |
| 1.307  | 0.207 | 19.000 | 0.254 | 0.476 | 6.112 |
| 1.996  | 0.060 | 19.000 | 0.760 | 0.476 | 6.112 |
| 1.230  | 0.234 | 19.000 | 0.783 | 0.476 | 6.112 |
| -1.017 | 0.322 | 19.000 | 0.396 | 0.476 | 6.112 |
| 2.330  | 0.031 | 19.000 | 0.978 | 0.476 | 6.112 |
| 1.804  | 0.087 | 19.000 | 0.591 | 0.476 | 6.112 |
| 3.052  | 0.007 | 19.000 | 0.343 | 0.476 | 6.112 |
| -1.090 | 0.289 | 19.000 | 0.446 | 0.476 | 6.112 |
| 2.059  | 0.054 | 19.000 | 0.490 | 0.476 | 6.112 |
| 1.116  | 0.278 | 19.000 | 0.719 | 0.476 | 6.112 |
| -1.098 | 0.286 | 19.000 | 0.287 | 0.476 | 6.112 |
| 1.626  | 0.120 | 19.000 | 0.466 | 0.476 | 6.112 |
| 1.033  | 0.314 | 19.000 | 0.579 | 0.476 | 6.112 |
| 2.666  | 0.015 | 19.000 | 0.408 | 0.476 | 6.112 |
| 1.587  | 0.129 | 19.000 | 0.498 | 0.476 | 6.112 |
| -0.473 | 0.642 | 19.000 | 0.338 | 0.476 | 6.112 |
| 2.089  | 0.050 | 19.000 | 0.335 | 0.476 | 6.112 |
| 1.251  | 0.226 | 19.000 | 0.275 | 0.476 | 6.112 |
| -2.819 | 0.011 | 19.000 | 0.551 | 0.476 | 6.112 |
| 2.114  | 0.048 | 19.000 | 0.334 | 0.476 | 6.112 |
| 1.830  | 0.083 | 19.000 | 0.318 | 0.476 | 6.112 |
| -0.886 | 0.387 | 19.000 | 0.520 | 0.476 | 6.112 |
| -1.259 | 0.223 | 19.000 | 0.489 | 0.476 | 6.112 |
| 2.595  | 0.018 | 19.000 | 0.479 | 0.476 | 6.112 |
| 1.263  | 0.222 | 19.000 | 0.397 | 0.476 | 6.112 |
| 0.755  | 0.459 | 19.000 | 0.994 | 0.476 | 6.112 |
| 0.154  | 0.879 | 19.000 | 1.158 | 0.476 | 6.112 |
| 1.678  | 0.110 | 19.000 | 1.226 | 0.476 | 6.112 |
| 1.376  | 0.185 | 19.000 | 0.914 | 0.476 | 6.112 |
| 1.652  | 0.115 | 19.000 | 0.215 | 0.476 | 6.112 |
| -2.467 | 0.023 | 19.000 | 0.393 | 0.476 | 6.112 |
| -2.733 | 0.013 | 19.000 | 0.392 | 0.476 | 6.112 |
| 0.061  | 0.952 | 19.000 | 0.311 | 0.476 | 6.112 |
| 1.970  | 0.064 | 19.000 | 0.264 | 0.476 | 6.112 |
| 0.073  | 0.942 | 19.000 | 0.462 | 0.476 | 6.112 |
| 2.480  | 0.023 | 19.000 | 0.489 | 0.476 | 6.112 |
| 2.336  | 0.031 | 19.000 | 0.782 | 0.476 | 6.112 |

|        |       |        |       |       |       |
|--------|-------|--------|-------|-------|-------|
| 0.891  | 0.384 | 19.000 | 0.427 | 0.476 | 6.112 |
| 2.356  | 0.029 | 19.000 | 0.626 | 0.476 | 6.112 |
| 0.736  | 0.471 | 19.000 | 0.425 | 0.476 | 6.112 |
| 2.800  | 0.011 | 19.000 | 0.594 | 0.476 | 6.112 |
| -1.858 | 0.079 | 19.000 | 0.386 | 0.476 | 6.112 |
| -1.606 | 0.125 | 19.000 | 0.439 | 0.476 | 6.112 |
| -2.374 | 0.028 | 19.000 | 0.479 | 0.476 | 6.112 |
| -2.005 | 0.059 | 19.000 | 0.640 | 0.476 | 6.112 |
| -0.543 | 0.593 | 19.000 | 0.668 | 0.476 | 6.112 |
| -1.933 | 0.068 | 19.000 | 0.485 | 0.476 | 6.112 |
| -2.067 | 0.053 | 19.000 | 0.499 | 0.476 | 6.112 |
| 0.734  | 0.472 | 19.000 | 0.549 | 0.476 | 6.112 |
| 2.366  | 0.029 | 19.000 | 0.366 | 0.476 | 6.112 |
| -1.599 | 0.126 | 19.000 | 0.491 | 0.476 | 6.112 |
| 0.330  | 0.745 | 19.000 | 0.429 | 0.476 | 6.112 |
| -0.783 | 0.444 | 19.000 | 0.446 | 0.476 | 6.112 |
| -2.417 | 0.026 | 19.000 | 0.664 | 0.476 | 6.112 |
| -1.163 | 0.259 | 19.000 | 0.386 | 0.476 | 6.112 |
| -1.267 | 0.220 | 19.000 | 0.375 | 0.476 | 6.112 |
| 0.706  | 0.489 | 19.000 | 0.575 | 0.476 | 6.112 |
| -1.572 | 0.132 | 19.000 | 0.502 | 0.476 | 6.112 |
| -1.940 | 0.067 | 19.000 | 0.320 | 0.476 | 6.112 |
| 2.506  | 0.021 | 19.000 | 0.312 | 0.476 | 6.112 |
| -1.373 | 0.186 | 19.000 | 0.480 | 0.476 | 6.112 |
| -0.832 | 0.416 | 19.000 | 0.411 | 0.476 | 6.112 |
| -1.002 | 0.329 | 19.000 | 0.445 | 0.476 | 6.112 |
| 2.289  | 0.034 | 19.000 | 0.245 | 0.476 | 6.112 |
| -2.156 | 0.044 | 19.000 | 0.308 | 0.476 | 6.112 |
| -2.895 | 0.009 | 19.000 | 0.522 | 0.476 | 6.112 |
| 0.002  | 0.999 | 19.000 | 1.219 | 0.476 | 6.112 |
| 1.429  | 0.169 | 19.000 | 0.755 | 0.476 | 6.112 |
| -2.758 | 0.013 | 19.000 | 1.012 | 0.476 | 6.112 |
| 1.899  | 0.073 | 19.000 | 1.252 | 0.476 | 6.112 |
| 1.247  | 0.228 | 19.000 | 0.387 | 0.476 | 6.112 |
| 1.066  | 0.300 | 19.000 | 0.637 | 0.476 | 6.112 |
| -1.841 | 0.081 | 19.000 | 0.353 | 0.476 | 6.112 |
| -0.454 | 0.655 | 19.000 | 0.363 | 0.476 | 6.112 |
| -0.783 | 0.443 | 19.000 | 0.352 | 0.476 | 6.112 |
| -1.416 | 0.173 | 19.000 | 0.586 | 0.476 | 6.112 |
| -1.078 | 0.295 | 19.000 | 0.468 | 0.476 | 6.112 |
| -1.694 | 0.107 | 19.000 | 0.492 | 0.476 | 6.112 |
| -2.290 | 0.034 | 19.000 | 0.403 | 0.476 | 6.112 |
| 1.074  | 0.296 | 19.000 | 0.483 | 0.476 | 6.112 |
| -1.210 | 0.241 | 19.000 | 0.393 | 0.476 | 6.112 |
| 2.255  | 0.036 | 19.000 | 0.453 | 0.476 | 6.112 |
| 1.189  | 0.249 | 19.000 | 0.334 | 0.476 | 6.112 |
| 0.477  | 0.639 | 19.000 | 0.573 | 0.476 | 6.112 |
| -1.658 | 0.114 | 19.000 | 0.406 | 0.476 | 6.112 |
| -2.616 | 0.017 | 19.000 | 0.618 | 0.476 | 6.112 |
| -2.546 | 0.020 | 19.000 | 0.657 | 0.476 | 6.112 |

|        |       |        |       |       |       |
|--------|-------|--------|-------|-------|-------|
| -2.361 | 0.029 | 19.000 | 0.648 | 0.476 | 6.112 |
| -1.157 | 0.262 | 19.000 | 0.498 | 0.476 | 6.112 |
| -1.880 | 0.075 | 19.000 | 0.540 | 0.476 | 6.112 |
| -1.526 | 0.143 | 19.000 | 0.456 | 0.476 | 6.112 |
| -1.145 | 0.266 | 19.000 | 0.696 | 0.476 | 6.112 |
| -0.504 | 0.620 | 19.000 | 0.719 | 0.476 | 6.112 |
| 2.147  | 0.045 | 19.000 | 1.573 | 0.476 | 6.112 |
| 1.787  | 0.090 | 19.000 | 0.366 | 0.476 | 6.112 |
| 1.859  | 0.079 | 19.000 | 0.585 | 0.476 | 6.112 |
| 1.030  | 0.316 | 19.000 | 0.456 | 0.476 | 6.112 |
| 0.642  | 0.528 | 19.000 | 0.516 | 0.476 | 6.112 |
| -0.039 | 0.969 | 19.000 | 0.479 | 0.476 | 6.112 |
| -0.096 | 0.925 | 19.000 | 0.468 | 0.476 | 6.112 |
| -0.648 | 0.524 | 19.000 | 0.742 | 0.476 | 6.112 |
| -3.495 | 0.002 | 19.000 | 0.346 | 0.476 | 6.112 |
| -0.198 | 0.845 | 19.000 | 0.293 | 0.476 | 6.112 |
| 0.529  | 0.603 | 19.000 | 0.316 | 0.476 | 6.112 |
| 2.728  | 0.013 | 19.000 | 0.260 | 0.476 | 6.112 |
| -2.150 | 0.045 | 19.000 | 0.364 | 0.476 | 6.112 |
| -1.159 | 0.261 | 19.000 | 0.349 | 0.476 | 6.112 |
| 1.843  | 0.081 | 19.000 | 0.473 | 0.476 | 6.112 |
| 2.596  | 0.018 | 19.000 | 0.852 | 0.476 | 6.112 |
| 2.023  | 0.057 | 19.000 | 0.662 | 0.476 | 6.112 |
| 0.379  | 0.709 | 19.000 | 0.330 | 0.476 | 6.112 |
| -0.839 | 0.412 | 19.000 | 0.593 | 0.476 | 6.112 |
| 0.287  | 0.777 | 19.000 | 0.413 | 0.476 | 6.112 |
| -0.075 | 0.941 | 19.000 | 0.324 | 0.476 | 6.112 |
| 0.088  | 0.931 | 19.000 | 0.291 | 0.476 | 6.112 |
| 0.455  | 0.654 | 19.000 | 0.418 | 0.476 | 6.112 |
| -3.196 | 0.005 | 19.000 | 0.455 | 0.476 | 6.112 |
| -1.730 | 0.100 | 19.000 | 0.517 | 0.476 | 6.112 |
| 3.125  | 0.006 | 19.000 | 0.233 | 0.476 | 6.112 |
| -2.077 | 0.052 | 19.000 | 0.660 | 0.476 | 6.112 |
| -2.918 | 0.009 | 19.000 | 0.305 | 0.476 | 6.112 |
| 2.241  | 0.037 | 19.000 | 0.516 | 0.476 | 6.112 |
| 0.127  | 0.900 | 19.000 | 0.418 | 0.476 | 6.112 |
| 2.115  | 0.048 | 19.000 | 0.427 | 0.476 | 6.112 |
| -0.027 | 0.979 | 19.000 | 0.466 | 0.476 | 6.112 |
| -0.210 | 0.836 | 19.000 | 0.410 | 0.476 | 6.112 |
| 0.661  | 0.516 | 19.000 | 0.459 | 0.476 | 6.112 |
| -2.204 | 0.040 | 19.000 | 0.571 | 0.476 | 6.112 |
| -1.199 | 0.245 | 19.000 | 0.653 | 0.476 | 6.112 |
| -1.172 | 0.256 | 19.000 | 0.313 | 0.476 | 6.112 |
| 3.938  | 0.001 | 19.000 | 0.606 | 0.476 | 6.112 |
| -1.917 | 0.070 | 19.000 | 0.770 | 0.476 | 6.112 |
| -1.828 | 0.083 | 19.000 | 0.749 | 0.476 | 6.112 |
| -1.134 | 0.271 | 19.000 | 0.427 | 0.476 | 6.112 |
| 1.551  | 0.137 | 19.000 | 0.398 | 0.476 | 6.112 |
| -3.231 | 0.004 | 19.000 | 0.427 | 0.476 | 6.112 |
| -0.767 | 0.453 | 19.000 | 0.382 | 0.476 | 6.112 |

|        |       |        |       |       |       |
|--------|-------|--------|-------|-------|-------|
| 0.733  | 0.473 | 19.000 | 0.350 | 0.476 | 6.112 |
| 0.447  | 0.660 | 19.000 | 0.757 | 0.476 | 6.112 |
| -0.012 | 0.991 | 19.000 | 0.819 | 0.476 | 6.112 |
| -1.447 | 0.164 | 19.000 | 0.570 | 0.476 | 6.112 |
| -2.141 | 0.045 | 19.000 | 0.415 | 0.476 | 6.112 |
| -0.054 | 0.958 | 19.000 | 0.947 | 0.476 | 6.112 |
| -2.713 | 0.014 | 19.000 | 0.564 | 0.476 | 6.112 |
| -2.706 | 0.014 | 19.000 | 0.518 | 0.476 | 6.112 |
| -1.931 | 0.069 | 19.000 | 0.507 | 0.476 | 6.112 |
| -2.306 | 0.033 | 19.000 | 0.440 | 0.476 | 6.112 |
| -1.227 | 0.235 | 19.000 | 0.355 | 0.476 | 6.112 |
| -0.391 | 0.700 | 19.000 | 0.432 | 0.476 | 6.112 |
| -0.055 | 0.957 | 19.000 | 0.421 | 0.476 | 6.112 |
| -4.013 | 0.001 | 19.000 | 0.400 | 0.476 | 6.112 |
| 0.488  | 0.631 | 19.000 | 0.733 | 0.476 | 6.112 |
| -1.519 | 0.145 | 19.000 | 0.662 | 0.476 | 6.112 |
| -0.609 | 0.549 | 19.000 | 0.865 | 0.476 | 6.112 |
| -0.659 | 0.518 | 19.000 | 0.766 | 0.476 | 6.112 |
| -0.066 | 0.948 | 19.000 | 0.627 | 0.476 | 6.112 |
| -0.529 | 0.603 | 19.000 | 0.834 | 0.476 | 6.112 |
| -0.314 | 0.757 | 19.000 | 0.599 | 0.476 | 6.112 |
| -0.212 | 0.835 | 19.000 | 1.140 | 0.476 | 6.112 |
| -1.637 | 0.118 | 19.000 | 0.846 | 0.476 | 6.112 |
| -0.650 | 0.524 | 19.000 | 0.542 | 0.476 | 6.112 |
| -0.355 | 0.726 | 19.000 | 1.007 | 0.476 | 6.112 |
| -0.265 | 0.794 | 19.000 | 0.711 | 0.476 | 6.112 |
| 0.238  | 0.814 | 19.000 | 0.558 | 0.476 | 6.112 |
| 0.883  | 0.388 | 19.000 | 0.735 | 0.476 | 6.112 |
| -2.134 | 0.046 | 19.000 | 0.960 | 0.476 | 6.112 |
| -1.044 | 0.309 | 19.000 | 0.739 | 0.476 | 6.112 |
| -0.682 | 0.503 | 19.000 | 1.270 | 0.476 | 6.112 |
| -2.647 | 0.016 | 19.000 | 0.493 | 0.476 | 6.112 |
| 0.336  | 0.740 | 19.000 | 0.624 | 0.476 | 6.112 |
| -2.100 | 0.049 | 19.000 | 0.659 | 0.476 | 6.112 |
| 2.184  | 0.042 | 19.000 | 0.380 | 0.476 | 6.112 |
| -1.230 | 0.234 | 19.000 | 0.740 | 0.476 | 6.112 |
| -0.942 | 0.358 | 19.000 | 0.690 | 0.476 | 6.112 |
| -1.609 | 0.124 | 19.000 | 0.266 | 0.476 | 6.112 |
| -1.409 | 0.175 | 19.000 | 0.353 | 0.476 | 6.112 |
| -1.886 | 0.075 | 19.000 | 0.608 | 0.476 | 6.112 |
| -2.431 | 0.025 | 19.000 | 0.591 | 0.476 | 6.112 |
| -0.229 | 0.821 | 19.000 | 0.551 | 0.476 | 6.112 |
| -0.163 | 0.872 | 19.000 | 0.632 | 0.476 | 6.112 |
| -2.196 | 0.041 | 19.000 | 0.522 | 0.476 | 6.112 |
| -1.948 | 0.066 | 19.000 | 0.658 | 0.476 | 6.112 |
| 0.310  | 0.760 | 19.000 | 0.745 | 0.476 | 6.112 |
| 1.951  | 0.066 | 19.000 | 0.327 | 0.476 | 6.112 |
| 2.099  | 0.049 | 19.000 | 0.551 | 0.476 | 6.112 |
| 2.302  | 0.033 | 19.000 | 0.457 | 0.476 | 6.112 |
| -1.895 | 0.073 | 19.000 | 0.796 | 0.476 | 6.112 |

|        |       |        |       |       |       |
|--------|-------|--------|-------|-------|-------|
| 1.100  | 0.285 | 19.000 | 0.408 | 0.476 | 6.112 |
| -0.578 | 0.570 | 19.000 | 0.363 | 0.476 | 6.112 |
| -0.308 | 0.761 | 19.000 | 0.453 | 0.476 | 6.112 |
| 0.119  | 0.907 | 19.000 | 0.387 | 0.476 | 6.112 |
| 0.067  | 0.947 | 19.000 | 0.475 | 0.476 | 6.112 |
| -0.034 | 0.973 | 19.000 | 0.936 | 0.476 | 6.112 |
| -0.029 | 0.977 | 19.000 | 0.394 | 0.476 | 6.112 |
| 0.509  | 0.616 | 19.000 | 0.453 | 0.476 | 6.112 |
| 0.334  | 0.742 | 19.000 | 0.423 | 0.476 | 6.112 |
| 0.299  | 0.768 | 19.000 | 0.415 | 0.476 | 6.112 |
| -2.231 | 0.038 | 19.000 | 0.385 | 0.476 | 6.112 |
| -1.021 | 0.320 | 19.000 | 0.394 | 0.476 | 6.112 |
| -0.842 | 0.410 | 19.000 | 0.385 | 0.476 | 6.112 |
| 0.681  | 0.504 | 19.000 | 0.411 | 0.476 | 6.112 |
| -0.588 | 0.563 | 19.000 | 0.345 | 0.476 | 6.112 |
| 0.492  | 0.629 | 19.000 | 0.436 | 0.476 | 6.112 |
| -1.297 | 0.210 | 19.000 | 0.518 | 0.476 | 6.112 |
| -0.896 | 0.382 | 19.000 | 0.602 | 0.476 | 6.112 |
| -0.747 | 0.464 | 19.000 | 0.580 | 0.476 | 6.112 |
| -0.792 | 0.438 | 19.000 | 0.644 | 0.476 | 6.112 |
| -0.775 | 0.448 | 19.000 | 0.612 | 0.476 | 6.112 |
| -0.808 | 0.429 | 19.000 | 0.682 | 0.476 | 6.112 |
| -0.682 | 0.504 | 19.000 | 0.673 | 0.476 | 6.112 |
| -1.024 | 0.319 | 19.000 | 0.728 | 0.476 | 6.112 |
| -0.935 | 0.361 | 19.000 | 0.724 | 0.476 | 6.112 |
| -0.891 | 0.384 | 19.000 | 0.697 | 0.476 | 6.112 |
| -1.706 | 0.104 | 19.000 | 0.506 | 0.476 | 6.112 |
| -1.256 | 0.224 | 19.000 | 0.555 | 0.476 | 6.112 |
| -1.249 | 0.227 | 19.000 | 0.533 | 0.476 | 6.112 |
| -1.222 | 0.237 | 19.000 | 0.571 | 0.476 | 6.112 |
| -1.199 | 0.245 | 19.000 | 0.561 | 0.476 | 6.112 |
| -0.931 | 0.363 | 19.000 | 0.627 | 0.476 | 6.112 |
| -0.901 | 0.379 | 19.000 | 0.632 | 0.476 | 6.112 |
| -0.883 | 0.388 | 19.000 | 0.610 | 0.476 | 6.112 |
| -0.850 | 0.406 | 19.000 | 0.658 | 0.476 | 6.112 |
| -0.757 | 0.458 | 19.000 | 0.675 | 0.476 | 6.112 |
| -0.899 | 0.380 | 19.000 | 0.647 | 0.476 | 6.112 |
| -0.842 | 0.411 | 19.000 | 0.638 | 0.476 | 6.112 |
| -0.634 | 0.534 | 19.000 | 0.607 | 0.476 | 6.112 |
| -0.602 | 0.555 | 19.000 | 0.628 | 0.476 | 6.112 |
| 1.054  | 0.305 | 19.000 | 0.564 | 0.476 | 6.112 |
| -0.987 | 0.336 | 19.000 | 0.622 | 0.476 | 6.112 |
| -0.950 | 0.354 | 19.000 | 0.458 | 0.476 | 6.112 |
| -0.915 | 0.372 | 19.000 | 0.504 | 0.476 | 6.112 |
| -0.254 | 0.803 | 19.000 | 0.812 | 0.476 | 6.112 |
| 0.159  | 0.875 | 19.000 | 0.886 | 0.476 | 6.112 |
| -0.152 | 0.881 | 19.000 | 0.922 | 0.476 | 6.112 |
| 0.369  | 0.716 | 19.000 | 0.647 | 0.476 | 6.112 |
| 0.318  | 0.754 | 19.000 | 0.644 | 0.476 | 6.112 |
| 0.311  | 0.759 | 19.000 | 0.668 | 0.476 | 6.112 |

|        |       |        |       |       |       |
|--------|-------|--------|-------|-------|-------|
| 0.286  | 0.778 | 19.000 | 0.627 | 0.476 | 6.112 |
| 0.278  | 0.784 | 19.000 | 0.626 | 0.476 | 6.112 |
| 0.274  | 0.787 | 19.000 | 0.657 | 0.476 | 6.112 |
| 0.211  | 0.835 | 19.000 | 0.590 | 0.476 | 6.112 |
| -0.278 | 0.784 | 19.000 | 0.583 | 0.476 | 6.112 |
| -0.026 | 0.980 | 19.000 | 0.533 | 0.476 | 6.112 |
| 0.784  | 0.443 | 19.000 | 0.415 | 0.476 | 6.112 |
| 0.689  | 0.499 | 19.000 | 0.401 | 0.476 | 6.112 |
| 0.424  | 0.676 | 19.000 | 0.395 | 0.476 | 6.112 |
| 0.372  | 0.714 | 19.000 | 0.403 | 0.476 | 6.112 |
| 0.173  | 0.865 | 19.000 | 0.441 | 0.476 | 6.112 |
| -0.153 | 0.880 | 19.000 | 1.079 | 0.476 | 6.112 |
| -0.494 | 0.627 | 19.000 | 0.779 | 0.476 | 6.112 |
| -0.465 | 0.647 | 19.000 | 0.784 | 0.476 | 6.112 |
| -0.369 | 0.716 | 19.000 | 0.774 | 0.476 | 6.112 |
| -0.357 | 0.725 | 19.000 | 0.791 | 0.476 | 6.112 |
| 1.305  | 0.208 | 19.000 | 3.042 | 0.476 | 6.112 |
| 0.086  | 0.932 | 19.000 | 0.536 | 0.476 | 6.112 |
| -0.010 | 0.992 | 19.000 | 0.557 | 0.476 | 6.112 |
| 0.390  | 0.701 | 19.000 | 0.559 | 0.476 | 6.112 |
| 0.982  | 0.339 | 19.000 | 1.334 | 0.476 | 6.112 |
| 0.147  | 0.885 | 19.000 | 0.570 | 0.476 | 6.112 |
| 0.075  | 0.941 | 19.000 | 0.655 | 0.476 | 6.112 |
| 0.154  | 0.879 | 19.000 | 1.114 | 0.476 | 6.112 |
| 0.012  | 0.990 | 19.000 | 1.274 | 0.476 | 6.112 |
| 1.208  | 0.242 | 19.000 | 3.013 | 0.476 | 6.112 |
| 0.722  | 0.479 | 19.000 | 0.317 | 0.476 | 6.112 |
| 0.449  | 0.658 | 19.000 | 0.390 | 0.476 | 6.112 |
| 0.424  | 0.676 | 19.000 | 0.383 | 0.476 | 6.112 |
| 0.550  | 0.589 | 19.000 | 0.268 | 0.476 | 6.112 |
| -0.281 | 0.782 | 19.000 | 0.350 | 0.476 | 6.112 |
| -0.145 | 0.886 | 19.000 | 0.295 | 0.476 | 6.112 |
| -0.110 | 0.913 | 19.000 | 0.341 | 0.476 | 6.112 |
| -1.701 | 0.105 | 19.000 | 0.235 | 0.476 | 6.112 |
| -0.819 | 0.423 | 19.000 | 0.250 | 0.476 | 6.112 |
| -0.721 | 0.480 | 19.000 | 0.247 | 0.476 | 6.112 |
| -0.303 | 0.765 | 19.000 | 0.478 | 0.476 | 6.112 |
| 2.515  | 0.021 | 19.000 | 0.998 | 0.476 | 6.112 |
| -0.500 | 0.623 | 19.000 | 0.301 | 0.476 | 6.112 |
| -0.419 | 0.680 | 19.000 | 0.527 | 0.476 | 6.112 |
| 2.254  | 0.036 | 19.000 | 0.313 | 0.476 | 6.112 |
| -2.759 | 0.012 | 19.000 | 0.328 | 0.476 | 6.112 |
| 0.845  | 0.408 | 19.000 | 0.509 | 0.476 | 6.112 |
| -1.216 | 0.239 | 19.000 | 0.489 | 0.476 | 6.112 |
| -0.140 | 0.890 | 19.000 | 0.385 | 0.476 | 6.112 |
| 1.321  | 0.202 | 19.000 | 0.461 | 0.476 | 6.112 |
| 1.040  | 0.312 | 19.000 | 0.548 | 0.476 | 6.112 |
| -1.744 | 0.097 | 19.000 | 0.459 | 0.476 | 6.112 |
| -1.192 | 0.248 | 19.000 | 0.531 | 0.476 | 6.112 |
| 0.110  | 0.913 | 19.000 | 0.368 | 0.476 | 6.112 |

|        |       |        |       |       |       |
|--------|-------|--------|-------|-------|-------|
| -1.838 | 0.082 | 19.000 | 0.493 | 0.476 | 6.112 |
| -1.254 | 0.225 | 19.000 | 0.559 | 0.476 | 6.112 |
| 2.512  | 0.021 | 19.000 | 0.498 | 0.476 | 6.112 |
| -2.168 | 0.043 | 19.000 | 0.561 | 0.476 | 6.112 |
| -0.630 | 0.536 | 19.000 | 0.446 | 0.476 | 6.112 |
| 1.802  | 0.087 | 19.000 | 0.419 | 0.476 | 6.112 |
| -2.649 | 0.016 | 19.000 | 0.943 | 0.476 | 6.112 |
| -1.886 | 0.075 | 19.000 | 0.405 | 0.476 | 6.112 |
| 0.160  | 0.875 | 19.000 | 0.719 | 0.476 | 6.112 |
| 2.194  | 0.041 | 19.000 | 0.298 | 0.476 | 6.112 |
| -0.453 | 0.656 | 19.000 | 0.452 | 0.476 | 6.112 |
| -1.551 | 0.137 | 19.000 | 0.523 | 0.476 | 6.112 |
| 2.683  | 0.015 | 19.000 | 0.630 | 0.476 | 6.112 |
| -1.941 | 0.067 | 19.000 | 0.427 | 0.476 | 6.112 |
| 2.366  | 0.029 | 19.000 | 1.257 | 0.476 | 6.112 |
| -2.396 | 0.027 | 19.000 | 0.718 | 0.476 | 6.112 |
| -2.151 | 0.045 | 19.000 | 0.424 | 0.476 | 6.112 |
| -0.326 | 0.748 | 19.000 | 0.528 | 0.476 | 6.112 |
| -0.763 | 0.455 | 19.000 | 0.467 | 0.476 | 6.112 |
| -2.241 | 0.037 | 19.000 | 1.214 | 0.476 | 6.112 |
| -1.567 | 0.134 | 19.000 | 1.182 | 0.476 | 6.112 |
| -2.459 | 0.024 | 19.000 | 1.304 | 0.476 | 6.112 |
| -1.115 | 0.279 | 19.000 | 0.588 | 0.476 | 6.112 |
| -1.454 | 0.162 | 19.000 | 0.467 | 0.476 | 6.112 |
| -1.937 | 0.068 | 19.000 | 0.775 | 0.476 | 6.112 |
| -1.028 | 0.317 | 19.000 | 0.671 | 0.476 | 6.112 |
| -0.869 | 0.396 | 19.000 | 0.625 | 0.476 | 6.112 |
| -2.028 | 0.057 | 19.000 | 1.080 | 0.476 | 6.112 |
| -1.217 | 0.238 | 19.000 | 0.552 | 0.476 | 6.112 |
| -0.884 | 0.388 | 19.000 | 0.432 | 0.476 | 6.112 |
| -0.123 | 0.903 | 19.000 | 0.632 | 0.476 | 6.112 |
| 0.244  | 0.810 | 19.000 | 0.639 | 0.476 | 6.112 |
| -2.086 | 0.051 | 19.000 | 0.532 | 0.476 | 6.112 |
| 1.676  | 0.110 | 19.000 | 0.522 | 0.476 | 6.112 |
| -2.289 | 0.034 | 19.000 | 0.272 | 0.476 | 6.112 |
| 0.369  | 0.716 | 19.000 | 0.360 | 0.476 | 6.112 |
| 0.849  | 0.406 | 19.000 | 0.286 | 0.476 | 6.112 |
| -0.913 | 0.373 | 19.000 | 0.494 | 0.476 | 6.112 |
| -1.290 | 0.212 | 19.000 | 0.446 | 0.476 | 6.112 |
| -2.647 | 0.016 | 19.000 | 0.751 | 0.476 | 6.112 |
| 0.294  | 0.772 | 19.000 | 0.754 | 0.476 | 6.112 |
| -2.370 | 0.029 | 19.000 | 0.769 | 0.476 | 6.112 |
| -1.507 | 0.148 | 19.000 | 0.684 | 0.476 | 6.112 |
| -1.527 | 0.143 | 19.000 | 0.697 | 0.476 | 6.112 |
| -1.128 | 0.273 | 19.000 | 0.426 | 0.476 | 6.112 |
| -0.133 | 0.896 | 19.000 | 1.696 | 0.476 | 6.112 |
| 0.361  | 0.722 | 19.000 | 0.355 | 0.476 | 6.112 |
| 2.555  | 0.019 | 19.000 | 0.713 | 0.476 | 6.112 |
| -1.224 | 0.236 | 19.000 | 0.395 | 0.476 | 6.112 |
| -1.082 | 0.293 | 19.000 | 0.846 | 0.476 | 6.112 |



|        |       |        |       |       |       |
|--------|-------|--------|-------|-------|-------|
| -1.705 | 0.104 | 19.000 | 0.479 | 0.476 | 6.112 |
| -1.020 | 0.320 | 19.000 | 0.557 | 0.476 | 6.112 |
| 2.754  | 0.013 | 19.000 | 0.469 | 0.476 | 6.112 |
| -1.728 | 0.100 | 19.000 | 0.364 | 0.476 | 6.112 |
| -1.276 | 0.217 | 19.000 | 0.414 | 0.476 | 6.112 |
| -0.779 | 0.445 | 19.000 | 0.389 | 0.476 | 6.112 |
| -0.160 | 0.874 | 19.000 | 0.587 | 0.476 | 6.112 |
| -1.034 | 0.314 | 19.000 | 0.773 | 0.476 | 6.112 |
| 0.422  | 0.678 | 19.000 | 0.421 | 0.476 | 6.112 |
| -0.143 | 0.888 | 19.000 | 0.433 | 0.476 | 6.112 |
| -0.319 | 0.753 | 19.000 | 0.535 | 0.476 | 6.112 |
| 3.020  | 0.007 | 19.000 | 0.453 | 0.476 | 6.112 |
| 2.049  | 0.055 | 19.000 | 0.858 | 0.476 | 6.112 |
| 2.437  | 0.025 | 19.000 | 0.409 | 0.476 | 6.112 |
| 2.929  | 0.009 | 19.000 | 0.327 | 0.476 | 6.112 |
| 3.033  | 0.007 | 19.000 | 0.665 | 0.476 | 6.112 |
| 0.043  | 0.966 | 19.000 | 0.770 | 0.476 | 6.112 |
| 1.043  | 0.310 | 19.000 | 0.535 | 0.476 | 6.112 |
| -1.388 | 0.181 | 19.000 | 0.593 | 0.476 | 6.112 |
| 0.522  | 0.608 | 19.000 | 0.442 | 0.476 | 6.112 |
| 0.966  | 0.346 | 19.000 | 0.492 | 0.476 | 6.112 |
| 1.860  | 0.078 | 19.000 | 0.951 | 0.476 | 6.112 |
| 0.496  | 0.626 | 19.000 | 0.496 | 0.476 | 6.112 |
| 2.701  | 0.014 | 19.000 | 0.459 | 0.476 | 6.112 |
| 0.508  | 0.617 | 19.000 | 0.523 | 0.476 | 6.112 |
| -1.525 | 0.144 | 19.000 | 0.501 | 0.476 | 6.112 |
| 1.450  | 0.163 | 19.000 | 0.370 | 0.476 | 6.112 |
| -3.347 | 0.003 | 19.000 | 0.312 | 0.476 | 6.112 |
| 2.149  | 0.045 | 19.000 | 0.376 | 0.476 | 6.112 |
| 1.281  | 0.216 | 19.000 | 0.310 | 0.476 | 6.112 |
| -0.390 | 0.701 | 19.000 | 0.487 | 0.476 | 6.112 |
| -1.888 | 0.074 | 19.000 | 0.676 | 0.476 | 6.112 |
| 1.602  | 0.126 | 19.000 | 0.409 | 0.476 | 6.112 |
| 0.281  | 0.782 | 19.000 | 0.385 | 0.476 | 6.112 |
| -0.694 | 0.496 | 19.000 | 0.442 | 0.476 | 6.112 |
| -0.034 | 0.973 | 19.000 | 0.366 | 0.476 | 6.112 |
| 1.832  | 0.083 | 19.000 | 0.447 | 0.476 | 6.112 |
| 1.881  | 0.075 | 19.000 | 0.413 | 0.476 | 6.112 |
| 0.187  | 0.854 | 19.000 | 0.481 | 0.476 | 6.112 |
| 1.776  | 0.092 | 19.000 | 0.602 | 0.476 | 6.112 |
| 0.971  | 0.344 | 19.000 | 0.441 | 0.476 | 6.112 |
| 0.936  | 0.361 | 19.000 | 0.711 | 0.476 | 6.112 |
| -1.552 | 0.137 | 19.000 | 0.645 | 0.476 | 6.112 |
| 1.073  | 0.297 | 19.000 | 0.561 | 0.476 | 6.112 |
| 2.655  | 0.016 | 19.000 | 0.354 | 0.476 | 6.112 |
| 0.838  | 0.412 | 19.000 | 0.455 | 0.476 | 6.112 |
| 1.152  | 0.264 | 19.000 | 0.308 | 0.476 | 6.112 |
| -2.097 | 0.050 | 19.000 | 0.531 | 0.476 | 6.112 |
| -2.084 | 0.051 | 19.000 | 0.526 | 0.476 | 6.112 |
| -1.955 | 0.065 | 19.000 | 0.569 | 0.476 | 6.112 |

|        |       |        |       |       |       |
|--------|-------|--------|-------|-------|-------|
| -1.873 | 0.077 | 19.000 | 0.556 | 0.476 | 6.112 |
| -1.967 | 0.064 | 19.000 | 0.528 | 0.476 | 6.112 |
| -1.915 | 0.071 | 19.000 | 0.522 | 0.476 | 6.112 |
| -1.784 | 0.090 | 19.000 | 0.568 | 0.476 | 6.112 |
| -1.721 | 0.101 | 19.000 | 0.589 | 0.476 | 6.112 |
| -0.949 | 0.354 | 19.000 | 0.427 | 0.476 | 6.112 |
| -0.675 | 0.508 | 19.000 | 0.428 | 0.476 | 6.112 |
| -2.909 | 0.009 | 19.000 | 0.715 | 0.476 | 6.112 |
| 0.951  | 0.353 | 19.000 | 0.489 | 0.476 | 6.112 |
| -1.133 | 0.272 | 19.000 | 0.443 | 0.476 | 6.112 |
| -1.103 | 0.284 | 19.000 | 0.713 | 0.476 | 6.112 |
| 0.205  | 0.840 | 19.000 | 0.768 | 0.476 | 6.112 |
| -0.916 | 0.371 | 19.000 | 0.662 | 0.476 | 6.112 |
| 2.132  | 0.046 | 19.000 | 0.835 | 0.476 | 6.112 |
| -1.511 | 0.147 | 19.000 | 0.543 | 0.476 | 6.112 |
| -1.938 | 0.068 | 19.000 | 0.364 | 0.476 | 6.112 |
| -0.544 | 0.593 | 19.000 | 0.398 | 0.476 | 6.112 |
| -0.871 | 0.394 | 19.000 | 0.323 | 0.476 | 6.112 |
| 0.627  | 0.538 | 19.000 | 0.630 | 0.476 | 6.112 |
| -1.316 | 0.204 | 19.000 | 0.567 | 0.476 | 6.112 |
| 1.141  | 0.268 | 19.000 | 0.994 | 0.476 | 6.112 |
| 2.251  | 0.036 | 19.000 | 0.699 | 0.476 | 6.112 |
| 2.727  | 0.013 | 19.000 | 1.019 | 0.476 | 6.112 |
| 2.438  | 0.025 | 19.000 | 0.653 | 0.476 | 6.112 |
| 2.717  | 0.014 | 19.000 | 1.081 | 0.476 | 6.112 |
| -0.689 | 0.499 | 19.000 | 1.202 | 0.476 | 6.112 |
| 1.579  | 0.131 | 19.000 | 0.931 | 0.476 | 6.112 |
| 1.206  | 0.243 | 19.000 | 0.424 | 0.476 | 6.112 |
| 1.872  | 0.077 | 19.000 | 0.874 | 0.476 | 6.112 |
| 2.305  | 0.033 | 19.000 | 0.860 | 0.476 | 6.112 |
| -1.743 | 0.098 | 19.000 | 0.395 | 0.476 | 6.112 |
| 2.607  | 0.017 | 19.000 | 0.773 | 0.476 | 6.112 |
| -1.726 | 0.101 | 19.000 | 0.428 | 0.476 | 6.112 |
| -0.646 | 0.526 | 19.000 | 0.480 | 0.476 | 6.112 |
| -2.057 | 0.054 | 19.000 | 0.441 | 0.476 | 6.112 |
| -0.452 | 0.656 | 19.000 | 0.517 | 0.476 | 6.112 |
| -1.645 | 0.116 | 19.000 | 0.368 | 0.476 | 6.112 |
| -1.204 | 0.243 | 19.000 | 0.395 | 0.476 | 6.112 |
| 2.809  | 0.011 | 19.000 | 0.605 | 0.476 | 6.112 |
| 3.086  | 0.006 | 19.000 | 0.294 | 0.476 | 6.112 |
| 0.982  | 0.339 | 19.000 | 0.583 | 0.476 | 6.112 |
| 1.012  | 0.324 | 19.000 | 0.470 | 0.476 | 6.112 |
| 1.543  | 0.139 | 19.000 | 0.441 | 0.476 | 6.112 |
| 2.489  | 0.022 | 19.000 | 1.057 | 0.476 | 6.112 |
| 0.624  | 0.540 | 19.000 | 0.301 | 0.476 | 6.112 |
| -2.108 | 0.049 | 19.000 | 0.507 | 0.476 | 6.112 |
| 1.310  | 0.206 | 19.000 | 0.611 | 0.476 | 6.112 |
| 0.997  | 0.331 | 19.000 | 0.449 | 0.476 | 6.112 |
| -1.009 | 0.326 | 19.000 | 0.572 | 0.476 | 6.112 |
| -0.122 | 0.904 | 19.000 | 0.414 | 0.476 | 6.112 |

|        |       |        |       |       |       |
|--------|-------|--------|-------|-------|-------|
| 2.348  | 0.030 | 19.000 | 0.281 | 0.476 | 6.112 |
| 0.746  | 0.465 | 19.000 | 0.303 | 0.476 | 6.112 |
| 2.080  | 0.051 | 19.000 | 0.386 | 0.476 | 6.112 |
| 0.608  | 0.550 | 19.000 | 0.324 | 0.476 | 6.112 |
| -0.059 | 0.954 | 19.000 | 0.612 | 0.476 | 6.112 |
| -0.028 | 0.978 | 19.000 | 0.667 | 0.476 | 6.112 |
| 0.027  | 0.979 | 19.000 | 0.633 | 0.476 | 6.112 |
| 2.028  | 0.057 | 19.000 | 0.363 | 0.476 | 6.112 |
| 1.167  | 0.258 | 19.000 | 0.699 | 0.476 | 6.112 |
| 0.809  | 0.429 | 19.000 | 0.704 | 0.476 | 6.112 |
| -1.069 | 0.298 | 19.000 | 0.477 | 0.476 | 6.112 |
| -0.361 | 0.722 | 19.000 | 0.373 | 0.476 | 6.112 |
| -0.158 | 0.876 | 19.000 | 1.103 | 0.476 | 6.112 |
| 0.995  | 0.332 | 19.000 | 0.510 | 0.476 | 6.112 |
| -1.356 | 0.191 | 19.000 | 0.575 | 0.476 | 6.112 |
| -0.350 | 0.730 | 19.000 | 0.694 | 0.476 | 6.112 |
| 2.213  | 0.039 | 19.000 | 0.869 | 0.476 | 6.112 |
| 0.553  | 0.587 | 19.000 | 0.399 | 0.476 | 6.112 |
| 1.863  | 0.078 | 19.000 | 0.515 | 0.476 | 6.112 |
| -2.631 | 0.016 | 19.000 | 0.449 | 0.476 | 6.112 |
| 1.083  | 0.293 | 19.000 | 0.653 | 0.476 | 6.112 |
| 1.349  | 0.193 | 19.000 | 0.588 | 0.476 | 6.112 |
| 0.670  | 0.511 | 19.000 | 0.759 | 0.476 | 6.112 |
| 0.806  | 0.430 | 19.000 | 0.528 | 0.476 | 6.112 |
| 0.957  | 0.351 | 19.000 | 0.523 | 0.476 | 6.112 |
| 0.927  | 0.366 | 19.000 | 0.610 | 0.476 | 6.112 |
| 0.763  | 0.455 | 19.000 | 0.690 | 0.476 | 6.112 |
| 0.729  | 0.475 | 19.000 | 0.695 | 0.476 | 6.112 |
| -0.358 | 0.724 | 19.000 | 0.578 | 0.476 | 6.112 |
| 0.412  | 0.685 | 19.000 | 0.425 | 0.476 | 6.112 |
| -2.375 | 0.028 | 19.000 | 0.378 | 0.476 | 6.112 |
| -1.552 | 0.137 | 19.000 | 0.394 | 0.476 | 6.112 |
| 2.835  | 0.011 | 19.000 | 0.296 | 0.476 | 6.112 |
| 2.685  | 0.015 | 19.000 | 0.681 | 0.476 | 6.112 |
| -0.487 | 0.632 | 19.000 | 0.372 | 0.476 | 6.112 |
| -0.888 | 0.386 | 19.000 | 0.702 | 0.476 | 6.112 |
| -1.082 | 0.293 | 19.000 | 0.405 | 0.476 | 6.112 |
| 2.511  | 0.021 | 19.000 | 0.369 | 0.476 | 6.112 |
| -1.169 | 0.257 | 19.000 | 0.380 | 0.476 | 6.112 |
| 1.110  | 0.281 | 19.000 | 0.389 | 0.476 | 6.112 |
| 1.620  | 0.122 | 19.000 | 0.491 | 0.476 | 6.112 |
| 0.226  | 0.824 | 19.000 | 0.760 | 0.476 | 6.112 |
| 1.033  | 0.315 | 19.000 | 0.964 | 0.476 | 6.112 |
| -1.419 | 0.172 | 19.000 | 0.617 | 0.476 | 6.112 |
| -0.075 | 0.941 | 19.000 | 0.634 | 0.476 | 6.112 |
| 1.161  | 0.260 | 19.000 | 0.373 | 0.476 | 6.112 |
| 1.848  | 0.080 | 19.000 | 0.524 | 0.476 | 6.112 |
| 1.216  | 0.239 | 19.000 | 0.475 | 0.476 | 6.112 |
| -1.406 | 0.176 | 19.000 | 0.515 | 0.476 | 6.112 |
| 0.406  | 0.690 | 19.000 | 0.565 | 0.476 | 6.112 |

|        |       |        |       |       |       |
|--------|-------|--------|-------|-------|-------|
| 0.041  | 0.968 | 19.000 | 0.538 | 0.476 | 6.112 |
| -0.214 | 0.833 | 19.000 | 0.381 | 0.476 | 6.112 |
| -0.692 | 0.497 | 19.000 | 0.580 | 0.476 | 6.112 |
| -0.357 | 0.725 | 19.000 | 0.499 | 0.476 | 6.112 |
| -0.006 | 0.996 | 19.000 | 1.009 | 0.476 | 6.112 |
| -1.048 | 0.308 | 19.000 | 0.727 | 0.476 | 6.112 |
| 2.262  | 0.036 | 19.000 | 0.523 | 0.476 | 6.112 |
| -1.891 | 0.074 | 19.000 | 0.541 | 0.476 | 6.112 |
| 1.926  | 0.069 | 19.000 | 0.274 | 0.476 | 6.112 |
| -2.473 | 0.023 | 19.000 | 0.623 | 0.476 | 6.112 |
| 0.804  | 0.431 | 19.000 | 0.503 | 0.476 | 6.112 |
| 0.702  | 0.491 | 19.000 | 0.514 | 0.476 | 6.112 |
| -0.407 | 0.688 | 19.000 | 0.556 | 0.476 | 6.112 |
| -2.252 | 0.036 | 19.000 | 0.570 | 0.476 | 6.112 |
| -2.972 | 0.008 | 19.000 | 0.417 | 0.476 | 6.112 |
| 0.461  | 0.650 | 19.000 | 0.451 | 0.476 | 6.112 |
| 0.326  | 0.748 | 19.000 | 0.545 | 0.476 | 6.112 |
| -1.375 | 0.185 | 19.000 | 0.680 | 0.476 | 6.112 |
| 0.475  | 0.640 | 19.000 | 0.861 | 0.476 | 6.112 |
| 1.118  | 0.278 | 19.000 | 0.755 | 0.476 | 6.112 |
| -0.764 | 0.454 | 19.000 | 0.601 | 0.476 | 6.112 |
| -1.037 | 0.313 | 19.000 | 0.442 | 0.476 | 6.112 |
| -0.374 | 0.712 | 19.000 | 0.401 | 0.476 | 6.112 |
| -1.460 | 0.161 | 19.000 | 0.451 | 0.476 | 6.112 |
| 0.367  | 0.718 | 19.000 | 0.649 | 0.476 | 6.112 |
| 0.884  | 0.388 | 19.000 | 0.639 | 0.476 | 6.112 |
| -1.637 | 0.118 | 19.000 | 0.511 | 0.476 | 6.112 |
| -2.129 | 0.047 | 19.000 | 0.415 | 0.476 | 6.112 |
| 2.402  | 0.027 | 19.000 | 0.464 | 0.476 | 6.112 |
| 1.716  | 0.102 | 19.000 | 0.431 | 0.476 | 6.112 |
| -0.157 | 0.877 | 19.000 | 0.665 | 0.476 | 6.112 |
| 1.722  | 0.101 | 19.000 | 0.416 | 0.476 | 6.112 |
| -0.172 | 0.865 | 19.000 | 0.444 | 0.476 | 6.112 |
| -0.452 | 0.657 | 19.000 | 0.274 | 0.476 | 6.112 |
| -1.723 | 0.101 | 19.000 | 0.348 | 0.476 | 6.112 |
| -1.202 | 0.244 | 19.000 | 0.481 | 0.476 | 6.112 |
| -1.687 | 0.108 | 19.000 | 0.428 | 0.476 | 6.112 |
| -2.120 | 0.047 | 19.000 | 0.472 | 0.476 | 6.112 |
| -1.175 | 0.254 | 19.000 | 0.583 | 0.476 | 6.112 |
| -2.356 | 0.029 | 19.000 | 0.390 | 0.476 | 6.112 |
| -0.223 | 0.826 | 19.000 | 0.529 | 0.476 | 6.112 |
| -1.682 | 0.109 | 19.000 | 0.429 | 0.476 | 6.112 |
| -0.254 | 0.803 | 19.000 | 0.323 | 0.476 | 6.112 |
| 2.651  | 0.016 | 19.000 | 0.843 | 0.476 | 6.112 |
| -0.629 | 0.537 | 19.000 | 0.536 | 0.476 | 6.112 |
| -1.295 | 0.211 | 19.000 | 0.284 | 0.476 | 6.112 |
| -1.326 | 0.200 | 19.000 | 0.443 | 0.476 | 6.112 |
| -1.853 | 0.080 | 19.000 | 0.543 | 0.476 | 6.112 |
| -0.906 | 0.376 | 19.000 | 0.390 | 0.476 | 6.112 |
| -1.069 | 0.298 | 19.000 | 0.638 | 0.476 | 6.112 |

|        |       |        |       |       |       |
|--------|-------|--------|-------|-------|-------|
| -0.497 | 0.625 | 19.000 | 0.443 | 0.476 | 6.112 |
| 0.257  | 0.800 | 19.000 | 0.446 | 0.476 | 6.112 |
| -0.883 | 0.388 | 19.000 | 0.488 | 0.476 | 6.112 |
| 0.728  | 0.476 | 19.000 | 0.633 | 0.476 | 6.112 |
| 1.753  | 0.096 | 19.000 | 0.543 | 0.476 | 6.112 |
| -0.698 | 0.494 | 19.000 | 0.825 | 0.476 | 6.112 |
| 1.194  | 0.247 | 19.000 | 0.423 | 0.476 | 6.112 |
| -0.859 | 0.401 | 19.000 | 0.438 | 0.476 | 6.112 |
| 3.693  | 0.002 | 19.000 | 0.531 | 0.476 | 6.112 |
| 1.609  | 0.124 | 19.000 | 0.844 | 0.476 | 6.112 |
| -0.082 | 0.935 | 19.000 | 0.370 | 0.476 | 6.112 |
| -0.102 | 0.920 | 19.000 | 0.434 | 0.476 | 6.112 |
| -0.642 | 0.529 | 19.000 | 0.868 | 0.476 | 6.112 |
| -0.190 | 0.851 | 19.000 | 0.617 | 0.476 | 6.112 |
| 0.000  | 1.000 | 19.000 | 0.549 | 0.476 | 6.112 |
| 0.155  | 0.878 | 19.000 | 0.319 | 0.476 | 6.112 |
| 1.234  | 0.232 | 19.000 | 0.563 | 0.476 | 6.112 |
| 0.998  | 0.331 | 19.000 | 0.676 | 0.476 | 6.112 |
| -1.496 | 0.151 | 19.000 | 0.436 | 0.476 | 6.112 |
| -0.949 | 0.355 | 19.000 | 0.449 | 0.476 | 6.112 |
| 0.290  | 0.775 | 19.000 | 0.605 | 0.476 | 6.112 |
| -2.106 | 0.049 | 19.000 | 0.270 | 0.476 | 6.112 |
| -1.582 | 0.130 | 19.000 | 0.513 | 0.476 | 6.112 |
| 1.916  | 0.070 | 19.000 | 0.591 | 0.476 | 6.112 |
| 2.066  | 0.053 | 19.000 | 0.352 | 0.476 | 6.112 |
| -1.219 | 0.238 | 19.000 | 0.322 | 0.476 | 6.112 |
| -0.856 | 0.403 | 19.000 | 0.343 | 0.476 | 6.112 |
| 1.225  | 0.236 | 19.000 | 1.550 | 0.476 | 6.112 |
| -2.098 | 0.050 | 19.000 | 0.403 | 0.476 | 6.112 |
| -0.098 | 0.923 | 19.000 | 0.337 | 0.476 | 6.112 |
| 1.706  | 0.104 | 19.000 | 0.573 | 0.476 | 6.112 |
| -1.184 | 0.251 | 19.000 | 0.445 | 0.476 | 6.112 |
| -0.153 | 0.880 | 19.000 | 0.309 | 0.476 | 6.112 |
| -1.201 | 0.244 | 19.000 | 0.368 | 0.476 | 6.112 |
| 1.960  | 0.065 | 19.000 | 0.399 | 0.476 | 6.112 |
| 2.598  | 0.018 | 19.000 | 0.367 | 0.476 | 6.112 |
| 1.409  | 0.175 | 19.000 | 0.252 | 0.476 | 6.112 |
| -2.219 | 0.039 | 19.000 | 0.491 | 0.476 | 6.112 |
| 0.953  | 0.353 | 19.000 | 0.422 | 0.476 | 6.112 |
| 0.606  | 0.552 | 19.000 | 0.424 | 0.476 | 6.112 |
| 0.207  | 0.838 | 19.000 | 0.350 | 0.476 | 6.112 |
| -1.417 | 0.173 | 19.000 | 0.274 | 0.476 | 6.112 |
| 0.573  | 0.573 | 19.000 | 0.362 | 0.476 | 6.112 |
| 0.370  | 0.715 | 19.000 | 0.447 | 0.476 | 6.112 |
| 1.479  | 0.156 | 19.000 | 0.405 | 0.476 | 6.112 |
| 0.217  | 0.831 | 19.000 | 0.467 | 0.476 | 6.112 |
| -0.117 | 0.908 | 19.000 | 0.746 | 0.476 | 6.112 |
| 1.071  | 0.298 | 19.000 | 0.388 | 0.476 | 6.112 |
| -2.005 | 0.059 | 19.000 | 0.279 | 0.476 | 6.112 |
| 1.836  | 0.082 | 19.000 | 0.247 | 0.476 | 6.112 |

|        |       |        |       |       |       |
|--------|-------|--------|-------|-------|-------|
| -2.303 | 0.033 | 19.000 | 0.779 | 0.476 | 6.112 |
| 2.385  | 0.028 | 19.000 | 0.967 | 0.476 | 6.112 |
| 0.504  | 0.620 | 19.000 | 0.277 | 0.476 | 6.112 |
| -2.790 | 0.012 | 19.000 | 0.352 | 0.476 | 6.112 |
| -0.718 | 0.482 | 19.000 | 0.324 | 0.476 | 6.112 |
| 1.419  | 0.172 | 19.000 | 0.323 | 0.476 | 6.112 |
| 0.465  | 0.647 | 19.000 | 0.736 | 0.476 | 6.112 |
| -0.031 | 0.975 | 19.000 | 0.717 | 0.476 | 6.112 |
| 0.387  | 0.703 | 19.000 | 0.371 | 0.476 | 6.112 |
| 0.017  | 0.987 | 19.000 | 0.535 | 0.476 | 6.112 |
| 2.544  | 0.020 | 19.000 | 0.539 | 0.476 | 6.112 |
| 2.531  | 0.020 | 19.000 | 0.552 | 0.476 | 6.112 |
| 2.219  | 0.039 | 19.000 | 0.432 | 0.476 | 6.112 |
| 1.305  | 0.207 | 19.000 | 0.652 | 0.476 | 6.112 |
| -1.055 | 0.305 | 19.000 | 0.454 | 0.476 | 6.112 |
| 0.682  | 0.503 | 19.000 | 0.689 | 0.476 | 6.112 |
| -0.546 | 0.591 | 19.000 | 0.438 | 0.476 | 6.112 |
| 0.526  | 0.605 | 19.000 | 0.475 | 0.476 | 6.112 |
| -0.474 | 0.641 | 19.000 | 0.432 | 0.476 | 6.112 |
| 0.448  | 0.659 | 19.000 | 0.520 | 0.476 | 6.112 |
| 0.450  | 0.658 | 19.000 | 0.477 | 0.476 | 6.112 |
| -0.452 | 0.657 | 19.000 | 0.438 | 0.476 | 6.112 |
| -0.353 | 0.728 | 19.000 | 0.423 | 0.476 | 6.112 |
| -0.341 | 0.737 | 19.000 | 0.423 | 0.476 | 6.112 |
| -0.319 | 0.753 | 19.000 | 0.442 | 0.476 | 6.112 |
| -0.252 | 0.803 | 19.000 | 0.545 | 0.476 | 6.112 |
| 0.216  | 0.832 | 19.000 | 0.468 | 0.476 | 6.112 |
| 0.191  | 0.851 | 19.000 | 0.456 | 0.476 | 6.112 |
| 0.156  | 0.878 | 19.000 | 0.418 | 0.476 | 6.112 |
| -0.133 | 0.895 | 19.000 | 0.371 | 0.476 | 6.112 |
| -0.014 | 0.989 | 19.000 | 0.442 | 0.476 | 6.112 |
| -1.100 | 0.285 | 19.000 | 0.545 | 0.476 | 6.112 |
| 1.074  | 0.296 | 19.000 | 0.391 | 0.476 | 6.112 |
| 0.917  | 0.370 | 19.000 | 0.363 | 0.476 | 6.112 |
| -2.164 | 0.043 | 19.000 | 0.479 | 0.476 | 6.112 |
| -0.108 | 0.915 | 19.000 | 0.497 | 0.476 | 6.112 |
| 2.017  | 0.058 | 19.000 | 0.402 | 0.476 | 6.112 |
| 2.630  | 0.017 | 19.000 | 0.623 | 0.476 | 6.112 |
| 1.972  | 0.063 | 19.000 | 0.862 | 0.476 | 6.112 |
| 2.042  | 0.055 | 19.000 | 0.491 | 0.476 | 6.112 |
| 0.154  | 0.879 | 19.000 | 0.295 | 0.476 | 6.112 |
| -0.799 | 0.434 | 19.000 | 0.363 | 0.476 | 6.112 |
| -0.192 | 0.850 | 19.000 | 0.529 | 0.476 | 6.112 |
| -1.787 | 0.090 | 19.000 | 0.453 | 0.476 | 6.112 |
| 1.960  | 0.065 | 19.000 | 0.327 | 0.476 | 6.112 |
| 0.739  | 0.469 | 19.000 | 0.497 | 0.476 | 6.112 |
| -1.516 | 0.146 | 19.000 | 0.484 | 0.476 | 6.112 |
| -1.605 | 0.125 | 19.000 | 0.343 | 0.476 | 6.112 |
| -0.899 | 0.380 | 19.000 | 0.616 | 0.476 | 6.112 |
| -1.641 | 0.117 | 19.000 | 0.375 | 0.476 | 6.112 |

|        |       |        |       |       |       |
|--------|-------|--------|-------|-------|-------|
| -0.687 | 0.500 | 19.000 | 0.476 | 0.476 | 6.112 |
| 1.593  | 0.128 | 19.000 | 0.342 | 0.476 | 6.112 |
| 1.523  | 0.144 | 19.000 | 0.435 | 0.476 | 6.112 |
| -0.406 | 0.689 | 19.000 | 0.452 | 0.476 | 6.112 |
| -1.386 | 0.182 | 19.000 | 0.569 | 0.476 | 6.112 |
| -1.073 | 0.297 | 19.000 | 0.391 | 0.476 | 6.112 |
| -1.494 | 0.152 | 19.000 | 0.491 | 0.476 | 6.112 |
| -0.292 | 0.774 | 19.000 | 0.448 | 0.476 | 6.112 |
| 1.070  | 0.298 | 19.000 | 0.217 | 0.476 | 6.112 |
| 1.426  | 0.170 | 19.000 | 0.310 | 0.476 | 6.112 |
| -0.147 | 0.885 | 19.000 | 0.668 | 0.476 | 6.112 |
| 2.577  | 0.018 | 19.000 | 0.373 | 0.476 | 6.112 |
| 2.963  | 0.008 | 19.000 | 0.597 | 0.476 | 6.112 |
| 0.055  | 0.957 | 19.000 | 0.611 | 0.476 | 6.112 |
| -3.040 | 0.007 | 19.000 | 0.346 | 0.476 | 6.112 |
| 0.619  | 0.543 | 19.000 | 0.330 | 0.476 | 6.112 |
| 2.156  | 0.044 | 19.000 | 0.348 | 0.476 | 6.112 |
| -2.350 | 0.030 | 19.000 | 0.408 | 0.476 | 6.112 |
| -1.732 | 0.099 | 19.000 | 0.683 | 0.476 | 6.112 |
| 0.255  | 0.801 | 19.000 | 0.443 | 0.476 | 6.112 |
| -2.511 | 0.021 | 19.000 | 0.909 | 0.476 | 6.112 |
| 1.668  | 0.112 | 19.000 | 0.451 | 0.476 | 6.112 |
| 0.879  | 0.391 | 19.000 | 0.500 | 0.476 | 6.112 |
| -0.144 | 0.887 | 19.000 | 0.391 | 0.476 | 6.112 |
| -0.973 | 0.343 | 19.000 | 0.279 | 0.476 | 6.112 |
| 2.268  | 0.035 | 19.000 | 0.604 | 0.476 | 6.112 |
| 1.330  | 0.199 | 19.000 | 0.551 | 0.476 | 6.112 |
| -1.429 | 0.169 | 19.000 | 0.731 | 0.476 | 6.112 |
| -1.293 | 0.211 | 19.000 | 0.551 | 0.476 | 6.112 |
| -3.004 | 0.007 | 19.000 | 0.243 | 0.476 | 6.112 |
| -0.824 | 0.420 | 19.000 | 0.829 | 0.476 | 6.112 |
| -0.997 | 0.331 | 19.000 | 0.341 | 0.476 | 6.112 |
| -1.018 | 0.321 | 19.000 | 0.556 | 0.476 | 6.112 |
| -1.467 | 0.159 | 19.000 | 0.407 | 0.476 | 6.112 |
| 0.170  | 0.867 | 19.000 | 0.621 | 0.476 | 6.112 |
| 0.596  | 0.558 | 19.000 | 0.474 | 0.476 | 6.112 |
| -0.873 | 0.393 | 19.000 | 0.580 | 0.476 | 6.112 |
| -1.904 | 0.072 | 19.000 | 0.388 | 0.476 | 6.112 |
| -2.490 | 0.022 | 19.000 | 0.459 | 0.476 | 6.112 |
| -0.737 | 0.470 | 19.000 | 0.726 | 0.476 | 6.112 |
| 1.902  | 0.072 | 19.000 | 0.795 | 0.476 | 6.112 |
| 1.260  | 0.223 | 19.000 | 0.429 | 0.476 | 6.112 |
| 2.616  | 0.017 | 19.000 | 0.958 | 0.476 | 6.112 |
| -2.246 | 0.037 | 19.000 | 0.452 | 0.476 | 6.112 |
| -1.324 | 0.201 | 19.000 | 0.649 | 0.476 | 6.112 |
| 1.973  | 0.063 | 19.000 | 0.504 | 0.476 | 6.112 |
| 2.726  | 0.013 | 19.000 | 0.988 | 0.476 | 6.112 |
| 1.977  | 0.063 | 19.000 | 0.702 | 0.476 | 6.112 |
| 1.402  | 0.177 | 19.000 | 0.275 | 0.476 | 6.112 |
| 0.639  | 0.530 | 19.000 | 0.458 | 0.476 | 6.112 |

|        |       |        |       |       |       |
|--------|-------|--------|-------|-------|-------|
| -1.411 | 0.174 | 19.000 | 0.409 | 0.476 | 6.112 |
| 0.120  | 0.906 | 19.000 | 0.522 | 0.476 | 6.112 |
| 0.089  | 0.930 | 19.000 | 0.356 | 0.476 | 6.112 |
| 1.416  | 0.173 | 19.000 | 0.344 | 0.476 | 6.112 |
| -2.709 | 0.014 | 19.000 | 0.552 | 0.476 | 6.112 |
| 0.037  | 0.971 | 19.000 | 0.453 | 0.476 | 6.112 |
| 0.394  | 0.698 | 19.000 | 0.653 | 0.476 | 6.112 |
| 2.317  | 0.032 | 19.000 | 0.708 | 0.476 | 6.112 |
| -3.037 | 0.007 | 19.000 | 0.461 | 0.476 | 6.112 |
| 2.003  | 0.060 | 19.000 | 0.353 | 0.476 | 6.112 |
| 1.890  | 0.074 | 19.000 | 0.509 | 0.476 | 6.112 |
| 2.128  | 0.047 | 19.000 | 0.624 | 0.476 | 6.112 |
| -0.276 | 0.786 | 19.000 | 0.411 | 0.476 | 6.112 |
| 2.056  | 0.054 | 19.000 | 1.009 | 0.476 | 6.112 |
| 2.064  | 0.053 | 19.000 | 0.754 | 0.476 | 6.112 |
| -1.005 | 0.327 | 19.000 | 0.460 | 0.476 | 6.112 |
| 0.161  | 0.874 | 19.000 | 0.487 | 0.476 | 6.112 |
| -2.370 | 0.029 | 19.000 | 0.478 | 0.476 | 6.112 |
| -0.804 | 0.431 | 19.000 | 0.371 | 0.476 | 6.112 |
| 2.937  | 0.008 | 19.000 | 0.693 | 0.476 | 6.112 |
| -2.288 | 0.034 | 19.000 | 0.461 | 0.476 | 6.112 |
| 1.707  | 0.104 | 19.000 | 0.364 | 0.476 | 6.112 |
| 0.074  | 0.942 | 19.000 | 0.429 | 0.476 | 6.112 |
| -1.888 | 0.074 | 19.000 | 0.842 | 0.476 | 6.112 |
| 3.185  | 0.005 | 19.000 | 0.339 | 0.476 | 6.112 |
| 1.401  | 0.177 | 19.000 | 0.620 | 0.476 | 6.112 |
| -0.573 | 0.573 | 19.000 | 0.544 | 0.476 | 6.112 |
| 2.611  | 0.017 | 19.000 | 0.487 | 0.476 | 6.112 |
| -0.098 | 0.923 | 19.000 | 0.276 | 0.476 | 6.112 |
| 0.630  | 0.536 | 19.000 | 0.346 | 0.476 | 6.112 |
| 1.292  | 0.212 | 19.000 | 0.435 | 0.476 | 6.112 |
| 1.822  | 0.084 | 19.000 | 0.480 | 0.476 | 6.112 |
| 1.817  | 0.085 | 19.000 | 1.060 | 0.476 | 6.112 |
| 1.737  | 0.099 | 19.000 | 0.812 | 0.476 | 6.112 |
| 0.952  | 0.353 | 19.000 | 0.655 | 0.476 | 6.112 |
| 1.656  | 0.114 | 19.000 | 1.016 | 0.476 | 6.112 |
| 0.873  | 0.394 | 19.000 | 0.665 | 0.476 | 6.112 |
| 1.273  | 0.218 | 19.000 | 0.477 | 0.476 | 6.112 |
| 3.129  | 0.006 | 19.000 | 0.485 | 0.476 | 6.112 |
| 2.343  | 0.030 | 19.000 | 0.664 | 0.476 | 6.112 |
| 2.225  | 0.038 | 19.000 | 0.612 | 0.476 | 6.112 |
| 2.536  | 0.020 | 19.000 | 0.896 | 0.476 | 6.112 |
| 1.372  | 0.186 | 19.000 | 0.994 | 0.476 | 6.112 |
| 1.967  | 0.064 | 19.000 | 0.947 | 0.476 | 6.112 |
| 2.157  | 0.044 | 19.000 | 1.412 | 0.476 | 6.112 |
| 0.835  | 0.414 | 19.000 | 0.618 | 0.476 | 6.112 |
| -0.836 | 0.413 | 19.000 | 0.569 | 0.476 | 6.112 |
| 0.695  | 0.495 | 19.000 | 0.583 | 0.476 | 6.112 |
| 2.296  | 0.033 | 19.000 | 0.589 | 0.476 | 6.112 |
| 0.650  | 0.524 | 19.000 | 0.550 | 0.476 | 6.112 |



|        |       |        |       |       |       |
|--------|-------|--------|-------|-------|-------|
| -1.073 | 0.297 | 19.000 | 0.382 | 0.476 | 6.112 |
| -0.393 | 0.699 | 19.000 | 0.761 | 0.476 | 6.112 |
| 2.065  | 0.053 | 19.000 | 0.739 | 0.476 | 6.112 |
| 0.122  | 0.904 | 19.000 | 0.546 | 0.476 | 6.112 |
| 2.454  | 0.024 | 19.000 | 0.853 | 0.476 | 6.112 |
| 1.942  | 0.067 | 19.000 | 0.929 | 0.476 | 6.112 |
| 2.243  | 0.037 | 19.000 | 0.550 | 0.476 | 6.112 |
| 0.742  | 0.467 | 19.000 | 0.506 | 0.476 | 6.112 |
| 2.750  | 0.013 | 19.000 | 1.150 | 0.476 | 6.112 |
| 3.107  | 0.006 | 19.000 | 0.577 | 0.476 | 6.112 |
| 2.394  | 0.027 | 19.000 | 0.935 | 0.476 | 6.112 |
| 2.125  | 0.047 | 19.000 | 1.025 | 0.476 | 6.112 |
| -1.420 | 0.172 | 19.000 | 0.833 | 0.476 | 6.112 |
| 1.058  | 0.303 | 19.000 | 0.480 | 0.476 | 6.112 |
| 2.026  | 0.057 | 19.000 | 0.736 | 0.476 | 6.112 |
| 1.293  | 0.212 | 19.000 | 0.613 | 0.476 | 6.112 |
| 1.942  | 0.067 | 19.000 | 0.969 | 0.476 | 6.112 |
| 2.227  | 0.038 | 19.000 | 1.051 | 0.476 | 6.112 |
| -2.592 | 0.018 | 19.000 | 0.547 | 0.476 | 6.112 |
| 0.796  | 0.436 | 19.000 | 0.400 | 0.476 | 6.112 |
| 0.536  | 0.598 | 19.000 | 0.360 | 0.476 | 6.112 |
| -0.562 | 0.580 | 19.000 | 0.942 | 0.476 | 6.112 |
| -3.257 | 0.004 | 19.000 | 0.486 | 0.476 | 6.112 |
| -2.113 | 0.048 | 19.000 | 0.650 | 0.476 | 6.112 |
| 2.275  | 0.035 | 19.000 | 0.816 | 0.476 | 6.112 |
| 2.512  | 0.021 | 19.000 | 1.053 | 0.476 | 6.112 |
| 0.739  | 0.469 | 19.000 | 0.440 | 0.476 | 6.112 |
| 1.863  | 0.078 | 19.000 | 1.294 | 0.476 | 6.112 |
| 1.874  | 0.076 | 19.000 | 0.460 | 0.476 | 6.112 |
| 2.352  | 0.030 | 19.000 | 0.492 | 0.476 | 6.112 |
| 1.016  | 0.322 | 19.000 | 0.420 | 0.476 | 6.112 |
| 0.133  | 0.895 | 19.000 | 0.489 | 0.476 | 6.112 |
| -1.235 | 0.232 | 19.000 | 0.407 | 0.476 | 6.112 |
| 2.894  | 0.009 | 19.000 | 0.375 | 0.476 | 6.112 |
| 2.244  | 0.037 | 19.000 | 0.481 | 0.476 | 6.112 |
| 0.349  | 0.731 | 19.000 | 0.723 | 0.476 | 6.112 |
| 1.196  | 0.246 | 19.000 | 0.401 | 0.476 | 6.112 |
| -2.197 | 0.041 | 19.000 | 0.379 | 0.476 | 6.112 |
| 1.499  | 0.150 | 19.000 | 0.627 | 0.476 | 6.112 |
| 2.641  | 0.016 | 19.000 | 0.640 | 0.476 | 6.112 |
| -1.249 | 0.227 | 19.000 | 0.421 | 0.476 | 6.112 |
| 1.009  | 0.326 | 19.000 | 0.360 | 0.476 | 6.112 |
| -0.318 | 0.754 | 19.000 | 0.621 | 0.476 | 6.112 |
| 2.491  | 0.022 | 19.000 | 0.814 | 0.476 | 6.112 |
| -1.784 | 0.090 | 19.000 | 0.561 | 0.476 | 6.112 |
| 1.512  | 0.147 | 19.000 | 0.408 | 0.476 | 6.112 |
| 0.403  | 0.691 | 19.000 | 0.405 | 0.476 | 6.112 |
| -0.420 | 0.679 | 19.000 | 0.551 | 0.476 | 6.112 |
| -1.746 | 0.097 | 19.000 | 0.782 | 0.476 | 6.112 |
| 2.137  | 0.046 | 19.000 | 0.775 | 0.476 | 6.112 |

|        |       |        |       |       |       |
|--------|-------|--------|-------|-------|-------|
| 2.001  | 0.060 | 19.000 | 1.109 | 0.476 | 6.112 |
| 2.659  | 0.015 | 19.000 | 0.732 | 0.476 | 6.112 |
| 2.875  | 0.010 | 19.000 | 1.083 | 0.476 | 6.112 |
| 2.170  | 0.043 | 19.000 | 0.824 | 0.476 | 6.112 |
| 2.583  | 0.018 | 19.000 | 1.090 | 0.476 | 6.112 |
| 2.398  | 0.027 | 19.000 | 1.022 | 0.476 | 6.112 |
| 2.230  | 0.038 | 19.000 | 0.962 | 0.476 | 6.112 |
| 2.602  | 0.017 | 19.000 | 0.656 | 0.476 | 6.112 |
| 2.694  | 0.014 | 19.000 | 1.359 | 0.476 | 6.112 |
| 2.384  | 0.028 | 19.000 | 0.553 | 0.476 | 6.112 |
| -2.394 | 0.027 | 19.000 | 0.336 | 0.476 | 6.112 |
| -1.988 | 0.061 | 19.000 | 0.334 | 0.476 | 6.112 |
| 2.350  | 0.030 | 19.000 | 1.039 | 0.476 | 6.112 |
| -1.165 | 0.258 | 19.000 | 0.336 | 0.476 | 6.112 |
| 0.174  | 0.863 | 19.000 | 0.413 | 0.476 | 6.112 |
| -0.374 | 0.712 | 19.000 | 0.472 | 0.476 | 6.112 |
| -0.305 | 0.764 | 19.000 | 2.087 | 0.476 | 6.112 |
| -1.808 | 0.086 | 19.000 | 0.457 | 0.476 | 6.112 |
| 0.788  | 0.440 | 19.000 | 0.738 | 0.476 | 6.112 |
| -2.796 | 0.012 | 19.000 | 0.667 | 0.476 | 6.112 |
| 1.624  | 0.121 | 19.000 | 1.216 | 0.476 | 6.112 |
| 1.431  | 0.169 | 19.000 | 0.641 | 0.476 | 6.112 |
| 2.416  | 0.026 | 19.000 | 0.727 | 0.476 | 6.112 |
| 2.119  | 0.048 | 19.000 | 0.558 | 0.476 | 6.112 |
| -2.285 | 0.034 | 19.000 | 0.341 | 0.476 | 6.112 |
| 0.987  | 0.336 | 19.000 | 0.599 | 0.476 | 6.112 |
| -3.158 | 0.005 | 19.000 | 0.314 | 0.476 | 6.112 |
| -0.419 | 0.680 | 19.000 | 0.340 | 0.476 | 6.112 |
| 2.250  | 0.036 | 19.000 | 0.809 | 0.476 | 6.112 |
| -2.190 | 0.041 | 19.000 | 0.387 | 0.476 | 6.112 |
| 0.710  | 0.486 | 19.000 | 0.237 | 0.476 | 6.112 |
| 2.068  | 0.052 | 19.000 | 0.705 | 0.476 | 6.112 |
| 1.009  | 0.325 | 19.000 | 0.387 | 0.476 | 6.112 |
| -2.940 | 0.008 | 19.000 | 0.429 | 0.476 | 6.112 |
| 1.743  | 0.098 | 19.000 | 0.517 | 0.476 | 6.112 |
| 1.637  | 0.118 | 19.000 | 0.402 | 0.476 | 6.112 |
| -1.062 | 0.302 | 19.000 | 0.429 | 0.476 | 6.112 |
| -0.700 | 0.492 | 19.000 | 0.545 | 0.476 | 6.112 |
| 2.070  | 0.052 | 19.000 | 1.032 | 0.476 | 6.112 |
| 2.806  | 0.011 | 19.000 | 0.421 | 0.476 | 6.112 |
| -0.681 | 0.504 | 19.000 | 0.494 | 0.476 | 6.112 |
| 2.528  | 0.020 | 19.000 | 1.152 | 0.476 | 6.112 |
| 1.588  | 0.129 | 19.000 | 0.618 | 0.476 | 6.112 |
| 0.694  | 0.496 | 19.000 | 0.304 | 0.476 | 6.112 |
| 1.866  | 0.078 | 19.000 | 0.668 | 0.476 | 6.112 |
| -2.798 | 0.011 | 19.000 | 0.482 | 0.476 | 6.112 |
| 1.550  | 0.138 | 19.000 | 0.533 | 0.476 | 6.112 |
| -0.150 | 0.882 | 19.000 | 0.403 | 0.476 | 6.112 |
| 2.336  | 0.031 | 19.000 | 0.389 | 0.476 | 6.112 |
| 1.871  | 0.077 | 19.000 | 0.471 | 0.476 | 6.112 |

|        |       |        |       |       |       |
|--------|-------|--------|-------|-------|-------|
| 2.206  | 0.040 | 19.000 | 0.565 | 0.476 | 6.112 |
| 0.751  | 0.462 | 19.000 | 0.211 | 0.476 | 6.112 |
| 1.557  | 0.136 | 19.000 | 0.448 | 0.476 | 6.112 |
| 2.285  | 0.034 | 19.000 | 0.507 | 0.476 | 6.112 |
| 1.143  | 0.267 | 19.000 | 0.579 | 0.476 | 6.112 |
| 2.242  | 0.037 | 19.000 | 1.125 | 0.476 | 6.112 |
| 1.950  | 0.066 | 19.000 | 0.369 | 0.476 | 6.112 |
| -2.166 | 0.043 | 19.000 | 0.452 | 0.476 | 6.112 |
| -1.308 | 0.206 | 19.000 | 0.439 | 0.476 | 6.112 |
| 1.936  | 0.068 | 19.000 | 0.808 | 0.476 | 6.112 |
| 2.049  | 0.054 | 19.000 | 0.370 | 0.476 | 6.112 |
| 2.324  | 0.031 | 19.000 | 0.394 | 0.476 | 6.112 |
| -2.470 | 0.023 | 19.000 | 0.680 | 0.476 | 6.112 |
| 3.054  | 0.007 | 19.000 | 0.400 | 0.476 | 6.112 |
| -3.794 | 0.001 | 19.000 | 0.419 | 0.476 | 6.112 |
| 2.047  | 0.055 | 19.000 | 0.883 | 0.476 | 6.112 |
| -2.982 | 0.008 | 19.000 | 0.578 | 0.476 | 6.112 |
| 1.639  | 0.118 | 19.000 | 0.524 | 0.476 | 6.112 |
| -1.358 | 0.190 | 19.000 | 0.604 | 0.476 | 6.112 |
| -2.483 | 0.023 | 19.000 | 0.516 | 0.476 | 6.112 |
| 1.238  | 0.231 | 19.000 | 0.379 | 0.476 | 6.112 |
| 1.042  | 0.310 | 19.000 | 0.506 | 0.476 | 6.112 |
| 1.952  | 0.066 | 19.000 | 0.415 | 0.476 | 6.112 |
| 1.975  | 0.063 | 19.000 | 0.357 | 0.476 | 6.112 |
| 1.950  | 0.066 | 19.000 | 0.622 | 0.476 | 6.112 |
| -0.579 | 0.569 | 19.000 | 0.472 | 0.476 | 6.112 |
| 3.055  | 0.007 | 19.000 | 0.400 | 0.476 | 6.112 |
| 2.360  | 0.029 | 19.000 | 0.759 | 0.476 | 6.112 |
| -2.276 | 0.035 | 19.000 | 0.284 | 0.476 | 6.112 |
| 1.514  | 0.147 | 19.000 | 0.226 | 0.476 | 6.112 |
| -1.306 | 0.207 | 19.000 | 0.564 | 0.476 | 6.112 |
| 2.263  | 0.036 | 19.000 | 0.382 | 0.476 | 6.112 |
| 1.840  | 0.081 | 19.000 | 0.589 | 0.476 | 6.112 |
| 0.009  | 0.993 | 19.000 | 0.403 | 0.476 | 6.112 |
| -0.705 | 0.489 | 19.000 | 0.450 | 0.476 | 6.112 |
| 1.357  | 0.191 | 19.000 | 0.498 | 0.476 | 6.112 |
| 2.578  | 0.018 | 19.000 | 0.727 | 0.476 | 6.112 |
| 0.205  | 0.840 | 19.000 | 0.446 | 0.476 | 6.112 |
| -1.715 | 0.103 | 19.000 | 0.481 | 0.476 | 6.112 |
| 1.585  | 0.130 | 19.000 | 0.484 | 0.476 | 6.112 |
| 1.222  | 0.237 | 19.000 | 0.371 | 0.476 | 6.112 |
| 2.662  | 0.015 | 19.000 | 0.315 | 0.476 | 6.112 |
| -2.341 | 0.030 | 19.000 | 0.535 | 0.476 | 6.112 |
| -0.100 | 0.921 | 19.000 | 0.753 | 0.476 | 6.112 |
| -2.685 | 0.015 | 19.000 | 0.338 | 0.476 | 6.112 |
| -0.277 | 0.785 | 19.000 | 0.545 | 0.476 | 6.112 |
| -0.659 | 0.518 | 19.000 | 0.281 | 0.476 | 6.112 |
| -1.368 | 0.187 | 19.000 | 0.603 | 0.476 | 6.112 |
| 2.740  | 0.013 | 19.000 | 0.494 | 0.476 | 6.112 |
| 0.791  | 0.439 | 19.000 | 0.444 | 0.476 | 6.112 |

|        |       |        |       |       |       |
|--------|-------|--------|-------|-------|-------|
| 2.688  | 0.015 | 19.000 | 0.405 | 0.476 | 6.112 |
| 0.139  | 0.891 | 19.000 | 0.518 | 0.476 | 6.112 |
| 2.508  | 0.021 | 19.000 | 0.485 | 0.476 | 6.112 |
| 0.148  | 0.884 | 19.000 | 0.964 | 0.476 | 6.112 |
| 1.980  | 0.062 | 19.000 | 0.300 | 0.476 | 6.112 |
| -1.002 | 0.329 | 19.000 | 0.405 | 0.476 | 6.112 |
| 1.586  | 0.129 | 19.000 | 0.330 | 0.476 | 6.112 |
| 1.485  | 0.154 | 19.000 | 0.345 | 0.476 | 6.112 |
| 0.386  | 0.704 | 19.000 | 0.300 | 0.476 | 6.112 |
| 2.525  | 0.021 | 19.000 | 0.621 | 0.476 | 6.112 |
| -1.936 | 0.068 | 19.000 | 0.516 | 0.476 | 6.112 |
| -0.174 | 0.864 | 19.000 | 0.216 | 0.476 | 6.112 |
| 2.294  | 0.033 | 19.000 | 0.609 | 0.476 | 6.112 |
| -0.382 | 0.706 | 19.000 | 0.705 | 0.476 | 6.112 |
| 2.215  | 0.039 | 19.000 | 0.403 | 0.476 | 6.112 |
| 0.220  | 0.828 | 19.000 | 0.474 | 0.476 | 6.112 |
| -2.431 | 0.025 | 19.000 | 1.045 | 0.476 | 6.112 |
| 2.965  | 0.008 | 19.000 | 0.839 | 0.476 | 6.112 |
| -2.000 | 0.060 | 19.000 | 0.442 | 0.476 | 6.112 |
| -0.347 | 0.732 | 19.000 | 0.650 | 0.476 | 6.112 |
| 1.319  | 0.203 | 19.000 | 0.579 | 0.476 | 6.112 |
| 1.377  | 0.185 | 19.000 | 0.669 | 0.476 | 6.112 |
| 0.593  | 0.560 | 19.000 | 0.336 | 0.476 | 6.112 |
| 2.720  | 0.014 | 19.000 | 0.324 | 0.476 | 6.112 |
| 2.113  | 0.048 | 19.000 | 0.290 | 0.476 | 6.112 |
| 3.187  | 0.005 | 19.000 | 0.304 | 0.476 | 6.112 |
| 1.832  | 0.083 | 19.000 | 0.245 | 0.476 | 6.112 |
| -0.117 | 0.908 | 19.000 | 0.516 | 0.476 | 6.112 |
| 1.712  | 0.103 | 19.000 | 0.444 | 0.476 | 6.112 |
| 0.737  | 0.470 | 19.000 | 0.582 | 0.476 | 6.112 |
| 0.294  | 0.772 | 19.000 | 0.600 | 0.476 | 6.112 |
| 2.031  | 0.057 | 19.000 | 1.005 | 0.476 | 6.112 |
| 1.063  | 0.301 | 19.000 | 0.530 | 0.476 | 6.112 |
| -1.409 | 0.175 | 19.000 | 0.367 | 0.476 | 6.112 |
| -0.735 | 0.471 | 19.000 | 0.499 | 0.476 | 6.112 |
| 2.911  | 0.009 | 19.000 | 0.493 | 0.476 | 6.112 |
| 0.729  | 0.475 | 19.000 | 0.411 | 0.476 | 6.112 |
| -4.176 | 0.001 | 19.000 | 0.234 | 0.476 | 6.112 |
| 1.473  | 0.157 | 19.000 | 0.618 | 0.476 | 6.112 |
| -0.341 | 0.737 | 19.000 | 0.556 | 0.476 | 6.112 |
| 1.811  | 0.086 | 19.000 | 1.067 | 0.476 | 6.112 |
| 1.509  | 0.148 | 19.000 | 0.368 | 0.476 | 6.112 |
| -1.019 | 0.321 | 19.000 | 0.300 | 0.476 | 6.112 |
| -1.843 | 0.081 | 19.000 | 0.471 | 0.476 | 6.112 |
| -1.998 | 0.060 | 19.000 | 0.703 | 0.476 | 6.112 |
| -1.638 | 0.118 | 19.000 | 0.684 | 0.476 | 6.112 |
| -1.062 | 0.302 | 19.000 | 0.679 | 0.476 | 6.112 |
| -0.972 | 0.343 | 19.000 | 0.385 | 0.476 | 6.112 |
| 2.170  | 0.043 | 19.000 | 0.770 | 0.476 | 6.112 |
| -1.092 | 0.288 | 19.000 | 0.267 | 0.476 | 6.112 |

|        |       |        |       |       |       |
|--------|-------|--------|-------|-------|-------|
| 1.004  | 0.328 | 19.000 | 0.544 | 0.476 | 6.112 |
| 1.801  | 0.088 | 19.000 | 0.337 | 0.476 | 6.112 |
| 0.556  | 0.585 | 19.000 | 0.386 | 0.476 | 6.112 |
| -2.795 | 0.012 | 19.000 | 0.336 | 0.476 | 6.112 |
| -1.942 | 0.067 | 19.000 | 0.400 | 0.476 | 6.112 |
| 0.519  | 0.610 | 19.000 | 1.346 | 0.476 | 6.112 |
| 2.260  | 0.036 | 19.000 | 0.338 | 0.476 | 6.112 |
| 0.283  | 0.780 | 19.000 | 0.299 | 0.476 | 6.112 |
| 1.588  | 0.129 | 19.000 | 0.389 | 0.476 | 6.112 |
| -0.211 | 0.835 | 19.000 | 0.402 | 0.476 | 6.112 |
| -0.606 | 0.552 | 19.000 | 0.882 | 0.476 | 6.112 |
| 2.164  | 0.043 | 19.000 | 0.432 | 0.476 | 6.112 |
| -2.050 | 0.054 | 19.000 | 0.422 | 0.476 | 6.112 |
| -1.643 | 0.117 | 19.000 | 0.352 | 0.476 | 6.112 |
| -2.117 | 0.048 | 19.000 | 0.307 | 0.476 | 6.112 |
| -2.118 | 0.048 | 19.000 | 0.454 | 0.476 | 6.112 |
| 0.079  | 0.938 | 19.000 | 0.443 | 0.476 | 6.112 |
| -2.680 | 0.015 | 19.000 | 0.336 | 0.476 | 6.112 |
| 0.283  | 0.780 | 19.000 | 0.449 | 0.476 | 6.112 |
| 0.124  | 0.903 | 19.000 | 0.685 | 0.476 | 6.112 |
| 2.179  | 0.042 | 19.000 | 0.281 | 0.476 | 6.112 |
| 1.017  | 0.322 | 19.000 | 0.379 | 0.476 | 6.112 |
| -1.509 | 0.148 | 19.000 | 0.618 | 0.476 | 6.112 |
| 1.112  | 0.280 | 19.000 | 0.348 | 0.476 | 6.112 |
| -1.759 | 0.095 | 19.000 | 0.608 | 0.476 | 6.112 |
| 3.005  | 0.007 | 19.000 | 0.788 | 0.476 | 6.112 |
| -1.881 | 0.075 | 19.000 | 0.909 | 0.476 | 6.112 |
| 1.064  | 0.301 | 19.000 | 0.444 | 0.476 | 6.112 |
| 0.416  | 0.682 | 19.000 | 0.548 | 0.476 | 6.112 |
| 0.688  | 0.499 | 19.000 | 0.371 | 0.476 | 6.112 |
| -1.570 | 0.133 | 19.000 | 0.419 | 0.476 | 6.112 |
| -1.209 | 0.242 | 19.000 | 0.445 | 0.476 | 6.112 |
| -2.830 | 0.011 | 19.000 | 0.702 | 0.476 | 6.112 |
| -0.211 | 0.835 | 19.000 | 0.286 | 0.476 | 6.112 |
| -2.498 | 0.022 | 19.000 | 0.418 | 0.476 | 6.112 |
| -2.085 | 0.051 | 19.000 | 0.491 | 0.476 | 6.112 |
| 0.388  | 0.702 | 19.000 | 0.374 | 0.476 | 6.112 |
| -1.666 | 0.112 | 19.000 | 0.373 | 0.476 | 6.112 |
| -1.963 | 0.064 | 19.000 | 0.353 | 0.476 | 6.112 |
| 3.109  | 0.006 | 19.000 | 0.466 | 0.476 | 6.112 |
| -2.257 | 0.036 | 19.000 | 0.676 | 0.476 | 6.112 |
| -0.702 | 0.491 | 19.000 | 0.532 | 0.476 | 6.112 |
| 0.415  | 0.683 | 19.000 | 0.513 | 0.476 | 6.112 |
| 2.155  | 0.044 | 19.000 | 0.474 | 0.476 | 6.112 |
| 1.225  | 0.236 | 19.000 | 0.570 | 0.476 | 6.112 |
| 0.394  | 0.698 | 19.000 | 0.623 | 0.476 | 6.112 |
| 1.129  | 0.273 | 19.000 | 0.433 | 0.476 | 6.112 |
| -0.147 | 0.885 | 19.000 | 0.461 | 0.476 | 6.112 |
| -2.762 | 0.012 | 19.000 | 1.003 | 0.476 | 6.112 |
| -0.637 | 0.532 | 19.000 | 0.767 | 0.476 | 6.112 |

|        |       |        |       |       |       |
|--------|-------|--------|-------|-------|-------|
| 2.613  | 0.017 | 19.000 | 0.356 | 0.476 | 6.112 |
| -1.372 | 0.186 | 19.000 | 0.390 | 0.476 | 6.112 |
| 2.168  | 0.043 | 19.000 | 0.602 | 0.476 | 6.112 |
| 1.485  | 0.154 | 19.000 | 0.533 | 0.476 | 6.112 |
| -2.344 | 0.030 | 19.000 | 0.321 | 0.476 | 6.112 |
| 2.271  | 0.035 | 19.000 | 1.251 | 0.476 | 6.112 |
| -1.120 | 0.277 | 19.000 | 0.494 | 0.476 | 6.112 |
| -2.643 | 0.016 | 19.000 | 0.418 | 0.476 | 6.112 |
| 1.530  | 0.143 | 19.000 | 0.573 | 0.476 | 6.112 |
| 0.261  | 0.797 | 19.000 | 0.307 | 0.476 | 6.112 |
| -1.900 | 0.073 | 19.000 | 0.446 | 0.476 | 6.112 |
| -1.107 | 0.282 | 19.000 | 0.618 | 0.476 | 6.112 |
| -1.560 | 0.135 | 19.000 | 0.531 | 0.476 | 6.112 |
| -1.241 | 0.230 | 19.000 | 0.834 | 0.476 | 6.112 |
| -0.727 | 0.476 | 19.000 | 0.707 | 0.476 | 6.112 |
| -1.263 | 0.222 | 19.000 | 0.583 | 0.476 | 6.112 |
| -1.435 | 0.168 | 19.000 | 0.471 | 0.476 | 6.112 |
| -1.811 | 0.086 | 19.000 | 0.358 | 0.476 | 6.112 |
| -2.000 | 0.060 | 19.000 | 0.583 | 0.476 | 6.112 |
| 1.524  | 0.144 | 19.000 | 0.667 | 0.476 | 6.112 |
| 0.264  | 0.794 | 19.000 | 0.493 | 0.476 | 6.112 |
| -0.931 | 0.364 | 19.000 | 0.399 | 0.476 | 6.112 |
| -0.040 | 0.969 | 19.000 | 0.412 | 0.476 | 6.112 |
| 2.475  | 0.023 | 19.000 | 0.591 | 0.476 | 6.112 |
| -2.070 | 0.052 | 19.000 | 0.576 | 0.476 | 6.112 |
| 2.227  | 0.038 | 19.000 | 0.633 | 0.476 | 6.112 |
| 1.551  | 0.137 | 19.000 | 0.932 | 0.476 | 6.112 |
| 1.880  | 0.076 | 19.000 | 0.353 | 0.476 | 6.112 |
| -1.398 | 0.178 | 19.000 | 0.471 | 0.476 | 6.112 |
| -0.586 | 0.565 | 19.000 | 0.657 | 0.476 | 6.112 |
| 2.089  | 0.050 | 19.000 | 0.458 | 0.476 | 6.112 |
| 0.686  | 0.501 | 19.000 | 0.396 | 0.476 | 6.112 |
| -0.042 | 0.967 | 19.000 | 0.858 | 0.476 | 6.112 |
| 0.503  | 0.621 | 19.000 | 0.535 | 0.476 | 6.112 |
| -1.474 | 0.157 | 19.000 | 0.317 | 0.476 | 6.112 |
| 1.543  | 0.139 | 19.000 | 0.344 | 0.476 | 6.112 |
| 0.395  | 0.697 | 19.000 | 0.462 | 0.476 | 6.112 |
| -1.251 | 0.226 | 19.000 | 0.411 | 0.476 | 6.112 |
| -1.509 | 0.148 | 19.000 | 0.443 | 0.476 | 6.112 |
| -1.590 | 0.128 | 19.000 | 0.597 | 0.476 | 6.112 |
| -1.517 | 0.146 | 19.000 | 0.937 | 0.476 | 6.112 |
| 3.382  | 0.003 | 19.000 | 0.495 | 0.476 | 6.112 |
| 0.324  | 0.749 | 19.000 | 1.203 | 0.476 | 6.112 |
| -1.038 | 0.312 | 19.000 | 0.428 | 0.476 | 6.112 |
| -1.728 | 0.100 | 19.000 | 0.597 | 0.476 | 6.112 |
| -0.746 | 0.465 | 19.000 | 0.617 | 0.476 | 6.112 |
| 0.224  | 0.825 | 19.000 | 0.774 | 0.476 | 6.112 |
| -0.891 | 0.384 | 19.000 | 0.516 | 0.476 | 6.112 |
| 2.199  | 0.040 | 19.000 | 0.779 | 0.476 | 6.112 |
| 3.312  | 0.004 | 19.000 | 0.444 | 0.476 | 6.112 |

|        |       |        |       |       |       |
|--------|-------|--------|-------|-------|-------|
| 0.052  | 0.959 | 19.000 | 0.483 | 0.476 | 6.112 |
| 1.270  | 0.220 | 19.000 | 0.618 | 0.476 | 6.112 |
| 0.535  | 0.599 | 19.000 | 0.389 | 0.476 | 6.112 |
| -2.042 | 0.055 | 19.000 | 0.361 | 0.476 | 6.112 |
| -0.543 | 0.593 | 19.000 | 0.428 | 0.476 | 6.112 |
| -0.509 | 0.616 | 19.000 | 0.456 | 0.476 | 6.112 |
| 2.693  | 0.014 | 19.000 | 0.426 | 0.476 | 6.112 |
| 0.128  | 0.900 | 19.000 | 0.770 | 0.476 | 6.112 |
| -0.386 | 0.704 | 19.000 | 0.460 | 0.476 | 6.112 |
| -0.944 | 0.357 | 19.000 | 0.431 | 0.476 | 6.112 |
| 0.067  | 0.947 | 19.000 | 1.236 | 0.476 | 6.112 |
| -0.004 | 0.997 | 19.000 | 0.425 | 0.476 | 6.112 |
| 1.990  | 0.061 | 19.000 | 1.379 | 0.476 | 6.112 |
| 0.950  | 0.354 | 19.000 | 0.421 | 0.476 | 6.112 |
| -0.826 | 0.419 | 19.000 | 0.407 | 0.476 | 6.112 |
| 0.499  | 0.624 | 19.000 | 0.450 | 0.476 | 6.112 |
| 2.087  | 0.051 | 19.000 | 0.544 | 0.476 | 6.112 |
| 1.740  | 0.098 | 19.000 | 0.758 | 0.476 | 6.112 |
| 1.878  | 0.076 | 19.000 | 0.951 | 0.476 | 6.112 |
| 1.022  | 0.320 | 19.000 | 0.681 | 0.476 | 6.112 |
| -1.582 | 0.130 | 19.000 | 0.902 | 0.476 | 6.112 |
| -2.035 | 0.056 | 19.000 | 1.101 | 0.476 | 6.112 |
| 1.053  | 0.306 | 19.000 | 0.710 | 0.476 | 6.112 |
| 2.408  | 0.026 | 19.000 | 0.637 | 0.476 | 6.112 |
| 1.900  | 0.073 | 19.000 | 1.064 | 0.476 | 6.112 |
| 2.370  | 0.029 | 19.000 | 0.235 | 0.476 | 6.112 |
| 0.301  | 0.766 | 19.000 | 0.595 | 0.476 | 6.112 |
| -0.865 | 0.398 | 19.000 | 0.660 | 0.476 | 6.112 |
| -1.543 | 0.139 | 19.000 | 1.067 | 0.476 | 6.112 |
| 1.600  | 0.126 | 19.000 | 0.310 | 0.476 | 6.112 |
| 1.114  | 0.279 | 19.000 | 0.426 | 0.476 | 6.112 |
| -0.003 | 0.997 | 19.000 | 0.355 | 0.476 | 6.112 |
| 0.045  | 0.964 | 19.000 | 0.430 | 0.476 | 6.112 |
| 1.276  | 0.217 | 19.000 | 0.320 | 0.476 | 6.112 |
| 0.710  | 0.486 | 19.000 | 0.433 | 0.476 | 6.112 |
| -3.296 | 0.004 | 19.000 | 0.379 | 0.476 | 6.112 |
| -1.512 | 0.147 | 19.000 | 0.400 | 0.476 | 6.112 |
| -1.703 | 0.105 | 19.000 | 0.869 | 0.476 | 6.112 |
| 1.012  | 0.324 | 19.000 | 0.646 | 0.476 | 6.112 |
| -0.884 | 0.388 | 19.000 | 0.590 | 0.476 | 6.112 |
| -1.467 | 0.159 | 19.000 | 0.609 | 0.476 | 6.112 |
| -1.247 | 0.228 | 19.000 | 0.411 | 0.476 | 6.112 |
| 1.069  | 0.299 | 19.000 | 0.282 | 0.476 | 6.112 |
| -1.231 | 0.233 | 19.000 | 0.418 | 0.476 | 6.112 |
| 1.748  | 0.097 | 19.000 | 0.431 | 0.476 | 6.112 |
| -0.699 | 0.493 | 19.000 | 0.438 | 0.476 | 6.112 |
| -0.677 | 0.507 | 19.000 | 0.303 | 0.476 | 6.112 |
| 0.531  | 0.601 | 19.000 | 0.383 | 0.476 | 6.112 |
| 2.526  | 0.021 | 19.000 | 0.980 | 0.476 | 6.112 |
| 1.188  | 0.249 | 19.000 | 0.480 | 0.476 | 6.112 |

|        |       |        |       |       |       |
|--------|-------|--------|-------|-------|-------|
| -1.727 | 0.100 | 19.000 | 0.595 | 0.476 | 6.112 |
| -2.969 | 0.008 | 19.000 | 0.682 | 0.476 | 6.112 |
| 2.640  | 0.016 | 19.000 | 0.625 | 0.476 | 6.112 |
| 2.107  | 0.049 | 19.000 | 0.394 | 0.476 | 6.112 |
| 0.414  | 0.684 | 19.000 | 0.476 | 0.476 | 6.112 |
| -1.407 | 0.175 | 19.000 | 0.250 | 0.476 | 6.112 |
| 0.711  | 0.485 | 19.000 | 0.430 | 0.476 | 6.112 |
| -0.785 | 0.442 | 19.000 | 0.451 | 0.476 | 6.112 |
| -1.225 | 0.236 | 19.000 | 0.561 | 0.476 | 6.112 |
| 3.403  | 0.003 | 19.000 | 0.390 | 0.476 | 6.112 |
| 0.747  | 0.464 | 19.000 | 0.674 | 0.476 | 6.112 |
| -1.152 | 0.264 | 19.000 | 0.684 | 0.476 | 6.112 |
| -0.649 | 0.524 | 19.000 | 0.491 | 0.476 | 6.112 |
| -2.315 | 0.032 | 19.000 | 0.491 | 0.476 | 6.112 |
| -2.013 | 0.058 | 19.000 | 0.451 | 0.476 | 6.112 |
| -2.059 | 0.053 | 19.000 | 0.403 | 0.476 | 6.112 |
| -1.995 | 0.061 | 19.000 | 0.415 | 0.476 | 6.112 |
| -2.414 | 0.026 | 19.000 | 0.385 | 0.476 | 6.112 |
| 0.236  | 0.816 | 19.000 | 0.560 | 0.476 | 6.112 |
| 1.762  | 0.094 | 19.000 | 1.130 | 0.476 | 6.112 |
| 2.119  | 0.047 | 19.000 | 0.463 | 0.476 | 6.112 |
| -1.495 | 0.151 | 19.000 | 0.466 | 0.476 | 6.112 |
| 0.431  | 0.671 | 19.000 | 0.497 | 0.476 | 6.112 |
| -1.619 | 0.122 | 19.000 | 0.691 | 0.476 | 6.112 |
| -2.379 | 0.028 | 19.000 | 0.395 | 0.476 | 6.112 |
| 0.104  | 0.918 | 19.000 | 0.473 | 0.476 | 6.112 |
| -3.379 | 0.003 | 19.000 | 0.915 | 0.476 | 6.112 |
| -0.629 | 0.537 | 19.000 | 0.546 | 0.476 | 6.112 |
| -0.225 | 0.824 | 19.000 | 0.508 | 0.476 | 6.112 |
| -2.466 | 0.023 | 19.000 | 0.647 | 0.476 | 6.112 |
| 1.904  | 0.072 | 19.000 | 0.939 | 0.476 | 6.112 |
| 1.895  | 0.073 | 19.000 | 0.536 | 0.476 | 6.112 |
| 2.055  | 0.054 | 19.000 | 1.022 | 0.476 | 6.112 |
| 0.445  | 0.661 | 19.000 | 0.457 | 0.476 | 6.112 |
| 2.536  | 0.020 | 19.000 | 0.482 | 0.476 | 6.112 |
| -2.610 | 0.017 | 19.000 | 0.559 | 0.476 | 6.112 |
| 0.865  | 0.398 | 19.000 | 0.486 | 0.476 | 6.112 |
| -1.639 | 0.118 | 19.000 | 0.452 | 0.476 | 6.112 |
| -0.746 | 0.465 | 19.000 | 0.602 | 0.476 | 6.112 |
| -1.582 | 0.130 | 19.000 | 0.282 | 0.476 | 6.112 |
| 0.216  | 0.832 | 19.000 | 0.585 | 0.476 | 6.112 |
| -1.414 | 0.173 | 19.000 | 0.522 | 0.476 | 6.112 |
| 2.356  | 0.029 | 19.000 | 0.709 | 0.476 | 6.112 |
| -1.928 | 0.069 | 19.000 | 0.510 | 0.476 | 6.112 |
| 1.698  | 0.106 | 19.000 | 0.552 | 0.476 | 6.112 |
| 2.148  | 0.045 | 19.000 | 0.634 | 0.476 | 6.112 |
| 1.573  | 0.132 | 19.000 | 0.602 | 0.476 | 6.112 |
| -0.099 | 0.922 | 19.000 | 0.462 | 0.476 | 6.112 |
| 2.550  | 0.020 | 19.000 | 0.396 | 0.476 | 6.112 |
| -0.859 | 0.401 | 19.000 | 0.749 | 0.476 | 6.112 |



|        |       |        |       |       |       |
|--------|-------|--------|-------|-------|-------|
| 2.021  | 0.058 | 19.000 | 0.595 | 0.476 | 6.112 |
| -1.641 | 0.117 | 19.000 | 0.473 | 0.476 | 6.112 |
| -2.472 | 0.023 | 19.000 | 0.968 | 0.476 | 6.112 |
| 1.113  | 0.279 | 19.000 | 0.450 | 0.476 | 6.112 |
| 0.200  | 0.844 | 19.000 | 0.784 | 0.476 | 6.112 |
| -1.101 | 0.285 | 19.000 | 0.432 | 0.476 | 6.112 |
| -0.016 | 0.988 | 19.000 | 0.588 | 0.476 | 6.112 |
| -1.105 | 0.283 | 19.000 | 1.533 | 0.476 | 6.112 |
| -0.690 | 0.498 | 19.000 | 0.671 | 0.476 | 6.112 |
| 0.212  | 0.834 | 19.000 | 0.481 | 0.476 | 6.112 |
| 1.563  | 0.134 | 19.000 | 0.528 | 0.476 | 6.112 |
| 2.077  | 0.052 | 19.000 | 0.653 | 0.476 | 6.112 |
| 2.448  | 0.024 | 19.000 | 1.195 | 0.476 | 6.112 |
| 1.543  | 0.139 | 19.000 | 0.506 | 0.476 | 6.112 |
| 1.733  | 0.099 | 19.000 | 0.960 | 0.476 | 6.112 |
| -1.477 | 0.156 | 19.000 | 0.972 | 0.476 | 6.112 |
| -1.982 | 0.062 | 19.000 | 0.538 | 0.476 | 6.112 |
| -2.046 | 0.055 | 19.000 | 0.846 | 0.476 | 6.112 |
| -0.918 | 0.370 | 19.000 | 0.878 | 0.476 | 6.112 |
| -1.986 | 0.062 | 19.000 | 0.641 | 0.476 | 6.112 |
| -0.838 | 0.412 | 19.000 | 0.605 | 0.476 | 6.112 |
| 2.300  | 0.033 | 19.000 | 0.434 | 0.476 | 6.112 |
| -1.771 | 0.093 | 19.000 | 0.585 | 0.476 | 6.112 |
| -1.397 | 0.179 | 19.000 | 0.454 | 0.476 | 6.112 |
| -0.777 | 0.447 | 19.000 | 0.586 | 0.476 | 6.112 |
| 1.770  | 0.093 | 19.000 | 0.272 | 0.476 | 6.112 |
| 2.667  | 0.015 | 19.000 | 0.366 | 0.476 | 6.112 |
| -1.288 | 0.213 | 19.000 | 0.450 | 0.476 | 6.112 |
| 0.295  | 0.771 | 19.000 | 0.285 | 0.476 | 6.112 |
| -1.631 | 0.119 | 19.000 | 0.359 | 0.476 | 6.112 |
| 1.130  | 0.273 | 19.000 | 0.504 | 0.476 | 6.112 |
| 2.295  | 0.033 | 19.000 | 0.592 | 0.476 | 6.112 |
| 2.847  | 0.010 | 19.000 | 0.690 | 0.476 | 6.112 |
| 3.138  | 0.005 | 19.000 | 0.584 | 0.476 | 6.112 |
| 1.790  | 0.089 | 19.000 | 0.607 | 0.476 | 6.112 |
| -0.791 | 0.439 | 19.000 | 0.515 | 0.476 | 6.112 |
| 2.619  | 0.017 | 19.000 | 0.642 | 0.476 | 6.112 |
| 2.275  | 0.035 | 19.000 | 0.603 | 0.476 | 6.112 |
| 0.539  | 0.596 | 19.000 | 0.497 | 0.476 | 6.112 |
| 2.037  | 0.056 | 19.000 | 0.522 | 0.476 | 6.112 |
| 1.895  | 0.073 | 19.000 | 0.911 | 0.476 | 6.112 |
| 2.508  | 0.021 | 19.000 | 0.461 | 0.476 | 6.112 |
| -0.121 | 0.905 | 19.000 | 0.366 | 0.476 | 6.112 |
| -1.033 | 0.315 | 19.000 | 0.484 | 0.476 | 6.112 |
| 3.334  | 0.003 | 19.000 | 0.644 | 0.476 | 6.112 |
| -1.809 | 0.086 | 19.000 | 0.414 | 0.476 | 6.112 |
| 0.045  | 0.964 | 19.000 | 0.783 | 0.476 | 6.112 |
| -0.307 | 0.763 | 19.000 | 0.410 | 0.476 | 6.112 |
| -0.625 | 0.539 | 19.000 | 0.635 | 0.476 | 6.112 |
| -1.352 | 0.192 | 19.000 | 0.549 | 0.476 | 6.112 |

|        |       |        |       |       |       |
|--------|-------|--------|-------|-------|-------|
| 2.013  | 0.059 | 19.000 | 0.521 | 0.476 | 6.112 |
| -0.624 | 0.540 | 19.000 | 0.424 | 0.476 | 6.112 |
| -1.233 | 0.233 | 19.000 | 0.658 | 0.476 | 6.112 |
| -0.528 | 0.603 | 19.000 | 0.299 | 0.476 | 6.112 |
| -0.920 | 0.369 | 19.000 | 0.483 | 0.476 | 6.112 |
| -1.739 | 0.098 | 19.000 | 0.458 | 0.476 | 6.112 |
| 0.624  | 0.540 | 19.000 | 0.317 | 0.476 | 6.112 |
| 3.603  | 0.002 | 19.000 | 0.519 | 0.476 | 6.112 |
| -0.329 | 0.745 | 19.000 | 0.379 | 0.476 | 6.112 |
| -0.553 | 0.587 | 19.000 | 0.547 | 0.476 | 6.112 |
| -2.573 | 0.019 | 19.000 | 0.245 | 0.476 | 6.112 |
| -1.835 | 0.082 | 19.000 | 0.804 | 0.476 | 6.112 |
| -0.494 | 0.627 | 19.000 | 0.898 | 0.476 | 6.112 |
| 1.870  | 0.077 | 19.000 | 0.372 | 0.476 | 6.112 |
| -2.295 | 0.033 | 19.000 | 0.511 | 0.476 | 6.112 |
| 1.292  | 0.212 | 19.000 | 0.379 | 0.476 | 6.112 |
| -0.042 | 0.967 | 19.000 | 0.414 | 0.476 | 6.112 |
| -1.810 | 0.086 | 19.000 | 0.415 | 0.476 | 6.112 |
| 2.916  | 0.009 | 19.000 | 0.535 | 0.476 | 6.112 |
| 2.958  | 0.008 | 19.000 | 0.507 | 0.476 | 6.112 |
| 1.472  | 0.157 | 19.000 | 0.449 | 0.476 | 6.112 |
| 2.839  | 0.010 | 19.000 | 0.418 | 0.476 | 6.112 |
| 1.658  | 0.114 | 19.000 | 0.552 | 0.476 | 6.112 |
| 2.471  | 0.023 | 19.000 | 0.469 | 0.476 | 6.112 |
| -1.329 | 0.199 | 19.000 | 0.374 | 0.476 | 6.112 |
| 1.474  | 0.157 | 19.000 | 0.377 | 0.476 | 6.112 |
| -0.654 | 0.521 | 19.000 | 0.344 | 0.476 | 6.112 |
| -0.236 | 0.816 | 19.000 | 0.516 | 0.476 | 6.112 |
| -1.332 | 0.199 | 19.000 | 0.455 | 0.476 | 6.112 |
| -0.523 | 0.607 | 19.000 | 0.476 | 0.476 | 6.112 |
| 1.553  | 0.137 | 19.000 | 0.643 | 0.476 | 6.112 |
| -1.543 | 0.139 | 19.000 | 0.543 | 0.476 | 6.112 |
| -0.055 | 0.957 | 19.000 | 0.476 | 0.476 | 6.112 |
| 0.938  | 0.360 | 19.000 | 0.358 | 0.476 | 6.112 |
| -1.007 | 0.327 | 19.000 | 0.554 | 0.476 | 6.112 |
| -0.622 | 0.541 | 19.000 | 0.517 | 0.476 | 6.112 |
| 0.336  | 0.740 | 19.000 | 0.546 | 0.476 | 6.112 |
| -1.381 | 0.183 | 19.000 | 0.654 | 0.476 | 6.112 |
| -1.880 | 0.076 | 19.000 | 0.555 | 0.476 | 6.112 |
| 0.923  | 0.368 | 19.000 | 0.496 | 0.476 | 6.112 |
| 1.863  | 0.078 | 19.000 | 0.446 | 0.476 | 6.112 |
| 0.795  | 0.436 | 19.000 | 0.540 | 0.476 | 6.112 |
| -2.148 | 0.045 | 19.000 | 0.359 | 0.476 | 6.112 |
| 1.400  | 0.177 | 19.000 | 0.479 | 0.476 | 6.112 |
| 0.610  | 0.549 | 19.000 | 0.440 | 0.476 | 6.112 |
| 1.032  | 0.315 | 19.000 | 0.452 | 0.476 | 6.112 |
| 0.230  | 0.821 | 19.000 | 0.493 | 0.476 | 6.112 |
| -0.493 | 0.628 | 19.000 | 0.448 | 0.476 | 6.112 |
| 3.504  | 0.002 | 19.000 | 0.449 | 0.476 | 6.112 |
| -1.429 | 0.169 | 19.000 | 0.492 | 0.476 | 6.112 |

|        |       |        |       |       |       |
|--------|-------|--------|-------|-------|-------|
| -3.931 | 0.001 | 19.000 | 0.384 | 0.476 | 6.112 |
| 0.292  | 0.773 | 19.000 | 0.500 | 0.476 | 6.112 |
| -1.691 | 0.107 | 19.000 | 0.382 | 0.476 | 6.112 |
| 0.589  | 0.562 | 19.000 | 0.397 | 0.476 | 6.112 |
| 2.208  | 0.040 | 19.000 | 0.579 | 0.476 | 6.112 |
| -1.372 | 0.186 | 19.000 | 0.438 | 0.476 | 6.112 |
| -1.257 | 0.224 | 19.000 | 0.477 | 0.476 | 6.112 |
| -1.201 | 0.244 | 19.000 | 0.497 | 0.476 | 6.112 |
| -0.721 | 0.480 | 19.000 | 0.930 | 0.476 | 6.112 |
| -2.324 | 0.031 | 19.000 | 0.508 | 0.476 | 6.112 |
| -1.441 | 0.166 | 19.000 | 0.514 | 0.476 | 6.112 |
| -1.214 | 0.240 | 19.000 | 0.476 | 0.476 | 6.112 |
| -1.137 | 0.270 | 19.000 | 0.598 | 0.476 | 6.112 |
| -1.091 | 0.289 | 19.000 | 0.550 | 0.476 | 6.112 |
| -0.917 | 0.371 | 19.000 | 0.630 | 0.476 | 6.112 |
| -0.175 | 0.863 | 19.000 | 1.097 | 0.476 | 6.112 |
| 2.110  | 0.048 | 19.000 | 0.406 | 0.476 | 6.112 |
| -1.372 | 0.186 | 19.000 | 0.587 | 0.476 | 6.112 |
| 1.117  | 0.278 | 19.000 | 0.449 | 0.476 | 6.112 |
| -0.393 | 0.698 | 19.000 | 0.469 | 0.476 | 6.112 |
| -1.190 | 0.249 | 19.000 | 0.692 | 0.476 | 6.112 |
| -0.114 | 0.911 | 19.000 | 0.438 | 0.476 | 6.112 |
| -0.527 | 0.604 | 19.000 | 0.332 | 0.476 | 6.112 |
| -0.536 | 0.598 | 19.000 | 0.415 | 0.476 | 6.112 |
| 1.606  | 0.125 | 19.000 | 0.542 | 0.476 | 6.112 |
| 1.670  | 0.111 | 19.000 | 0.655 | 0.476 | 6.112 |
| -1.386 | 0.182 | 19.000 | 0.465 | 0.476 | 6.112 |
| 2.054  | 0.054 | 19.000 | 0.517 | 0.476 | 6.112 |
| -1.752 | 0.096 | 19.000 | 0.514 | 0.476 | 6.112 |
| 0.096  | 0.925 | 19.000 | 0.386 | 0.476 | 6.112 |
| 2.694  | 0.014 | 19.000 | 0.339 | 0.476 | 6.112 |
| -2.059 | 0.053 | 19.000 | 0.415 | 0.476 | 6.112 |
| 1.267  | 0.220 | 19.000 | 0.421 | 0.476 | 6.112 |
| -0.953 | 0.352 | 19.000 | 0.311 | 0.476 | 6.112 |
| 3.315  | 0.004 | 19.000 | 0.284 | 0.476 | 6.112 |
| -0.121 | 0.905 | 19.000 | 0.435 | 0.476 | 6.112 |
| -2.852 | 0.010 | 19.000 | 0.427 | 0.476 | 6.112 |
| 0.934  | 0.362 | 19.000 | 0.327 | 0.476 | 6.112 |
| -1.169 | 0.257 | 19.000 | 0.818 | 0.476 | 6.112 |
| -0.736 | 0.471 | 19.000 | 1.151 | 0.476 | 6.112 |
| -1.051 | 0.306 | 19.000 | 0.463 | 0.476 | 6.112 |
| -0.553 | 0.586 | 19.000 | 0.494 | 0.476 | 6.112 |
| -3.278 | 0.004 | 19.000 | 0.394 | 0.476 | 6.112 |
| 0.155  | 0.878 | 19.000 | 0.420 | 0.476 | 6.112 |
| -2.147 | 0.045 | 19.000 | 0.480 | 0.476 | 6.112 |
| -1.047 | 0.308 | 19.000 | 0.517 | 0.476 | 6.112 |
| -1.813 | 0.086 | 19.000 | 0.509 | 0.476 | 6.112 |
| 0.902  | 0.378 | 19.000 | 0.383 | 0.476 | 6.112 |
| 3.299  | 0.004 | 19.000 | 0.325 | 0.476 | 6.112 |
| -1.409 | 0.175 | 19.000 | 0.505 | 0.476 | 6.112 |

|        |       |        |       |       |       |
|--------|-------|--------|-------|-------|-------|
| -0.692 | 0.497 | 19.000 | 0.457 | 0.476 | 6.112 |
| 0.295  | 0.771 | 19.000 | 0.629 | 0.476 | 6.112 |
| -1.428 | 0.170 | 19.000 | 0.515 | 0.476 | 6.112 |
| -0.292 | 0.773 | 19.000 | 0.475 | 0.476 | 6.112 |
| -0.961 | 0.349 | 19.000 | 0.428 | 0.476 | 6.112 |
| -2.285 | 0.034 | 19.000 | 0.690 | 0.476 | 6.112 |
| 1.935  | 0.068 | 19.000 | 0.803 | 0.476 | 6.112 |
| -1.772 | 0.093 | 19.000 | 0.430 | 0.476 | 6.112 |
| 0.823  | 0.421 | 19.000 | 0.674 | 0.476 | 6.112 |
| 0.077  | 0.939 | 19.000 | 0.387 | 0.476 | 6.112 |
| 0.378  | 0.709 | 19.000 | 0.470 | 0.476 | 6.112 |
| -1.061 | 0.302 | 19.000 | 0.537 | 0.476 | 6.112 |
| 1.644  | 0.117 | 19.000 | 0.497 | 0.476 | 6.112 |
| -0.993 | 0.333 | 19.000 | 0.603 | 0.476 | 6.112 |
| 1.409  | 0.175 | 19.000 | 0.440 | 0.476 | 6.112 |
| -1.897 | 0.073 | 19.000 | 0.402 | 0.476 | 6.112 |
| -0.105 | 0.917 | 19.000 | 0.534 | 0.476 | 6.112 |
| -2.312 | 0.032 | 19.000 | 0.460 | 0.476 | 6.112 |
| 3.055  | 0.007 | 19.000 | 0.910 | 0.476 | 6.112 |
| -1.044 | 0.310 | 19.000 | 0.528 | 0.476 | 6.112 |
| 0.641  | 0.529 | 19.000 | 0.656 | 0.476 | 6.112 |
| 0.371  | 0.715 | 19.000 | 0.393 | 0.476 | 6.112 |
| -1.353 | 0.192 | 19.000 | 0.525 | 0.476 | 6.112 |
| -0.636 | 0.533 | 19.000 | 0.380 | 0.476 | 6.112 |
| -1.041 | 0.311 | 19.000 | 0.763 | 0.476 | 6.112 |
| -0.732 | 0.473 | 19.000 | 0.696 | 0.476 | 6.112 |
| -1.115 | 0.279 | 19.000 | 0.618 | 0.476 | 6.112 |
| -1.846 | 0.080 | 19.000 | 0.423 | 0.476 | 6.112 |
| -2.517 | 0.021 | 19.000 | 1.202 | 0.476 | 6.112 |
| 2.431  | 0.025 | 19.000 | 0.881 | 0.476 | 6.112 |
| -0.020 | 0.985 | 19.000 | 0.616 | 0.476 | 6.112 |
| 0.700  | 0.492 | 19.000 | 0.408 | 0.476 | 6.112 |
| -0.510 | 0.616 | 19.000 | 0.519 | 0.476 | 6.112 |
| 1.190  | 0.249 | 19.000 | 0.535 | 0.476 | 6.112 |
| -1.341 | 0.196 | 19.000 | 0.869 | 0.476 | 6.112 |
| -1.268 | 0.220 | 19.000 | 0.421 | 0.476 | 6.112 |
| -1.624 | 0.121 | 19.000 | 0.445 | 0.476 | 6.112 |
| 0.964  | 0.347 | 19.000 | 0.386 | 0.476 | 6.112 |
| -1.443 | 0.165 | 19.000 | 0.346 | 0.476 | 6.112 |
| -1.936 | 0.068 | 19.000 | 0.584 | 0.476 | 6.112 |
| -1.488 | 0.153 | 19.000 | 0.483 | 0.476 | 6.112 |
| -1.198 | 0.246 | 19.000 | 0.401 | 0.476 | 6.112 |
| 2.473  | 0.023 | 19.000 | 0.539 | 0.476 | 6.112 |
| -0.764 | 0.454 | 19.000 | 0.419 | 0.476 | 6.112 |
| -1.427 | 0.170 | 19.000 | 0.536 | 0.476 | 6.112 |
| 2.392  | 0.027 | 19.000 | 0.668 | 0.476 | 6.112 |
| 1.360  | 0.190 | 19.000 | 0.381 | 0.476 | 6.112 |
| -0.874 | 0.393 | 19.000 | 0.478 | 0.476 | 6.112 |
| -0.677 | 0.507 | 19.000 | 0.506 | 0.476 | 6.112 |
| 0.793  | 0.438 | 19.000 | 0.642 | 0.476 | 6.112 |

|        |       |        |       |       |       |
|--------|-------|--------|-------|-------|-------|
| -1.095 | 0.287 | 19.000 | 0.761 | 0.476 | 6.112 |
| -2.670 | 0.015 | 19.000 | 0.460 | 0.476 | 6.112 |
| 1.172  | 0.256 | 19.000 | 0.792 | 0.476 | 6.112 |
| -2.418 | 0.026 | 19.000 | 0.456 | 0.476 | 6.112 |
| -1.428 | 0.169 | 19.000 | 0.640 | 0.476 | 6.112 |
| -1.215 | 0.239 | 19.000 | 0.410 | 0.476 | 6.112 |
| 2.040  | 0.056 | 19.000 | 0.875 | 0.476 | 6.112 |
| 1.985  | 0.062 | 19.000 | 0.901 | 0.476 | 6.112 |
| -1.759 | 0.095 | 19.000 | 0.691 | 0.476 | 6.112 |
| 0.966  | 0.346 | 19.000 | 0.458 | 0.476 | 6.112 |
| -0.866 | 0.397 | 19.000 | 0.481 | 0.476 | 6.112 |
| -2.487 | 0.022 | 19.000 | 0.401 | 0.476 | 6.112 |
| -0.564 | 0.580 | 19.000 | 0.431 | 0.476 | 6.112 |
| -1.170 | 0.256 | 19.000 | 0.604 | 0.476 | 6.112 |
| -1.998 | 0.060 | 19.000 | 0.646 | 0.476 | 6.112 |
| 0.882  | 0.389 | 19.000 | 0.673 | 0.476 | 6.112 |
| -1.554 | 0.137 | 19.000 | 0.686 | 0.476 | 6.112 |
| -1.495 | 0.151 | 19.000 | 0.446 | 0.476 | 6.112 |
| 1.770  | 0.093 | 19.000 | 0.429 | 0.476 | 6.112 |
| -0.518 | 0.610 | 19.000 | 0.505 | 0.476 | 6.112 |
| -1.682 | 0.109 | 19.000 | 0.514 | 0.476 | 6.112 |
| 1.482  | 0.155 | 19.000 | 0.557 | 0.476 | 6.112 |
| -0.780 | 0.445 | 19.000 | 0.519 | 0.476 | 6.112 |
| -0.578 | 0.570 | 19.000 | 0.404 | 0.476 | 6.112 |
| -1.397 | 0.179 | 19.000 | 0.353 | 0.476 | 6.112 |
| -2.881 | 0.010 | 19.000 | 0.524 | 0.476 | 6.112 |
| -1.130 | 0.273 | 19.000 | 0.341 | 0.476 | 6.112 |
| -0.719 | 0.481 | 19.000 | 0.615 | 0.476 | 6.112 |
| -0.869 | 0.396 | 19.000 | 0.415 | 0.476 | 6.112 |
| 3.964  | 0.001 | 19.000 | 0.673 | 0.476 | 6.112 |
| 2.497  | 0.022 | 19.000 | 0.401 | 0.476 | 6.112 |
| -0.408 | 0.688 | 19.000 | 0.436 | 0.476 | 6.112 |
| -0.964 | 0.347 | 19.000 | 0.489 | 0.476 | 6.112 |
| -3.931 | 0.001 | 19.000 | 0.541 | 0.476 | 6.112 |
| -0.555 | 0.586 | 19.000 | 0.552 | 0.476 | 6.112 |
| -1.597 | 0.127 | 19.000 | 0.793 | 0.476 | 6.112 |
| 6.417  | 0.000 | 19.000 | 0.393 | 0.476 | 6.112 |
| -2.146 | 0.045 | 19.000 | 0.606 | 0.476 | 6.112 |
| 3.138  | 0.005 | 19.000 | 0.380 | 0.476 | 6.112 |
| -0.014 | 0.989 | 19.000 | 0.420 | 0.476 | 6.112 |
| 2.295  | 0.033 | 19.000 | 0.737 | 0.476 | 6.112 |
| -1.385 | 0.182 | 19.000 | 0.736 | 0.476 | 6.112 |
| 0.085  | 0.934 | 19.000 | 0.493 | 0.476 | 6.112 |
| 1.473  | 0.157 | 19.000 | 0.331 | 0.476 | 6.112 |
| 1.324  | 0.201 | 19.000 | 0.638 | 0.476 | 6.112 |
| 0.156  | 0.878 | 19.000 | 0.886 | 0.476 | 6.112 |
| -3.167 | 0.005 | 19.000 | 0.426 | 0.476 | 6.112 |
| 0.479  | 0.638 | 19.000 | 0.716 | 0.476 | 6.112 |
| 2.181  | 0.042 | 19.000 | 0.742 | 0.476 | 6.112 |
| 3.068  | 0.006 | 19.000 | 0.842 | 0.476 | 6.112 |

|        |       |        |       |       |       |
|--------|-------|--------|-------|-------|-------|
| -0.210 | 0.836 | 19.000 | 0.494 | 0.476 | 6.112 |
| -2.731 | 0.013 | 19.000 | 0.450 | 0.476 | 6.112 |
| 2.121  | 0.047 | 19.000 | 0.615 | 0.476 | 6.112 |
| 2.237  | 0.038 | 19.000 | 0.497 | 0.476 | 6.112 |
| -2.317 | 0.032 | 19.000 | 0.407 | 0.476 | 6.112 |
| 0.750  | 0.463 | 19.000 | 0.427 | 0.476 | 6.112 |
| -0.883 | 0.388 | 19.000 | 0.579 | 0.476 | 6.112 |
| 0.294  | 0.772 | 19.000 | 0.427 | 0.476 | 6.112 |
| -1.457 | 0.162 | 19.000 | 0.516 | 0.476 | 6.112 |
| -0.692 | 0.497 | 19.000 | 0.825 | 0.476 | 6.112 |
| -1.716 | 0.102 | 19.000 | 0.523 | 0.476 | 6.112 |
| 2.612  | 0.017 | 19.000 | 0.718 | 0.476 | 6.112 |
| -1.758 | 0.095 | 19.000 | 0.510 | 0.476 | 6.112 |
| -0.142 | 0.889 | 19.000 | 1.021 | 0.476 | 6.112 |
| 0.655  | 0.520 | 19.000 | 0.732 | 0.476 | 6.112 |
| -0.692 | 0.497 | 19.000 | 0.403 | 0.476 | 6.112 |
| -1.025 | 0.318 | 19.000 | 1.092 | 0.476 | 6.112 |
| -0.496 | 0.625 | 19.000 | 0.531 | 0.476 | 6.112 |
| 2.519  | 0.021 | 19.000 | 0.597 | 0.476 | 6.112 |
| -1.594 | 0.127 | 19.000 | 0.696 | 0.476 | 6.112 |
| 0.999  | 0.330 | 19.000 | 0.390 | 0.476 | 6.112 |
| 2.426  | 0.025 | 19.000 | 0.355 | 0.476 | 6.112 |
| 0.776  | 0.447 | 19.000 | 0.366 | 0.476 | 6.112 |
| -0.552 | 0.588 | 19.000 | 0.428 | 0.476 | 6.112 |
| 2.059  | 0.053 | 19.000 | 0.909 | 0.476 | 6.112 |
| -1.307 | 0.207 | 19.000 | 0.616 | 0.476 | 6.112 |
| 1.562  | 0.135 | 19.000 | 0.822 | 0.476 | 6.112 |
| -1.489 | 0.153 | 19.000 | 0.432 | 0.476 | 6.112 |
| 1.109  | 0.281 | 19.000 | 0.451 | 0.476 | 6.112 |
| 1.710  | 0.104 | 19.000 | 0.496 | 0.476 | 6.112 |
| -1.135 | 0.270 | 19.000 | 0.396 | 0.476 | 6.112 |
| -0.281 | 0.782 | 19.000 | 0.315 | 0.476 | 6.112 |
| 1.211  | 0.241 | 19.000 | 0.709 | 0.476 | 6.112 |
| -1.771 | 0.093 | 19.000 | 0.448 | 0.476 | 6.112 |
| -0.204 | 0.840 | 19.000 | 0.514 | 0.476 | 6.112 |
| -0.208 | 0.837 | 19.000 | 0.492 | 0.476 | 6.112 |
| -2.117 | 0.048 | 19.000 | 0.352 | 0.476 | 6.112 |
| -1.012 | 0.324 | 19.000 | 0.620 | 0.476 | 6.112 |
| -0.765 | 0.454 | 19.000 | 0.382 | 0.476 | 6.112 |
| -1.028 | 0.317 | 19.000 | 0.512 | 0.476 | 6.112 |
| 2.382  | 0.028 | 19.000 | 0.476 | 0.476 | 6.112 |
| 0.360  | 0.723 | 19.000 | 0.782 | 0.476 | 6.112 |
| -0.645 | 0.527 | 19.000 | 0.655 | 0.476 | 6.112 |
| -1.312 | 0.205 | 19.000 | 0.404 | 0.476 | 6.112 |
| -1.281 | 0.216 | 19.000 | 0.432 | 0.476 | 6.112 |
| -2.125 | 0.047 | 19.000 | 0.347 | 0.476 | 6.112 |
| 0.759  | 0.457 | 19.000 | 0.742 | 0.476 | 6.112 |
| 2.141  | 0.045 | 19.000 | 0.326 | 0.476 | 6.112 |
| -1.544 | 0.139 | 19.000 | 0.555 | 0.476 | 6.112 |
| -2.133 | 0.046 | 19.000 | 0.552 | 0.476 | 6.112 |

|        |       |        |       |       |       |
|--------|-------|--------|-------|-------|-------|
| -4.068 | 0.001 | 19.000 | 0.749 | 0.476 | 6.112 |
| -0.769 | 0.451 | 19.000 | 0.359 | 0.476 | 6.112 |
| -0.184 | 0.856 | 19.000 | 0.650 | 0.476 | 6.112 |
| -1.599 | 0.126 | 19.000 | 0.497 | 0.476 | 6.112 |
| -1.565 | 0.134 | 19.000 | 1.001 | 0.476 | 6.112 |
| -1.567 | 0.134 | 19.000 | 0.836 | 0.476 | 6.112 |
| -0.410 | 0.686 | 19.000 | 0.528 | 0.476 | 6.112 |
| -0.301 | 0.767 | 19.000 | 0.682 | 0.476 | 6.112 |
| 0.463  | 0.649 | 19.000 | 0.762 | 0.476 | 6.112 |
| -0.921 | 0.369 | 19.000 | 0.580 | 0.476 | 6.112 |
| -1.020 | 0.321 | 19.000 | 0.427 | 0.476 | 6.112 |
| -0.135 | 0.894 | 19.000 | 0.352 | 0.476 | 6.112 |
| 0.044  | 0.965 | 19.000 | 0.544 | 0.476 | 6.112 |
| 2.132  | 0.046 | 19.000 | 0.362 | 0.476 | 6.112 |
| 0.471  | 0.643 | 19.000 | 0.748 | 0.476 | 6.112 |
| 0.270  | 0.790 | 19.000 | 0.609 | 0.476 | 6.112 |
| 5.510  | 0.000 | 19.000 | 0.412 | 0.476 | 6.112 |
| 1.085  | 0.292 | 19.000 | 0.620 | 0.476 | 6.112 |
| -0.690 | 0.498 | 19.000 | 0.589 | 0.476 | 6.112 |
| -0.696 | 0.495 | 19.000 | 0.691 | 0.476 | 6.112 |
| -1.249 | 0.227 | 19.000 | 0.654 | 0.476 | 6.112 |
| 0.189  | 0.852 | 19.000 | 0.459 | 0.476 | 6.112 |
| -1.935 | 0.068 | 19.000 | 0.389 | 0.476 | 6.112 |
| 2.398  | 0.027 | 19.000 | 0.340 | 0.476 | 6.112 |
| 2.961  | 0.008 | 19.000 | 0.593 | 0.476 | 6.112 |
| 4.453  | 0.000 | 19.000 | 0.522 | 0.476 | 6.112 |
| 2.950  | 0.008 | 19.000 | 0.468 | 0.476 | 6.112 |
| -2.075 | 0.052 | 19.000 | 0.546 | 0.476 | 6.112 |
| 2.574  | 0.019 | 19.000 | 0.680 | 0.476 | 6.112 |
| -1.304 | 0.208 | 19.000 | 0.344 | 0.476 | 6.112 |
| 0.573  | 0.573 | 19.000 | 0.480 | 0.476 | 6.112 |
| -0.010 | 0.992 | 19.000 | 0.400 | 0.476 | 6.112 |
| -1.262 | 0.222 | 19.000 | 0.409 | 0.476 | 6.112 |
| -0.526 | 0.605 | 19.000 | 0.462 | 0.476 | 6.112 |
| -0.459 | 0.651 | 19.000 | 0.421 | 0.476 | 6.112 |
| 0.558  | 0.584 | 19.000 | 1.130 | 0.476 | 6.112 |
| -2.557 | 0.019 | 19.000 | 0.783 | 0.476 | 6.112 |
| -2.144 | 0.045 | 19.000 | 0.456 | 0.476 | 6.112 |
| -1.375 | 0.185 | 19.000 | 0.421 | 0.476 | 6.112 |
| 0.299  | 0.768 | 19.000 | 0.520 | 0.476 | 6.112 |
| -0.098 | 0.923 | 19.000 | 0.713 | 0.476 | 6.112 |
| -2.600 | 0.018 | 19.000 | 0.561 | 0.476 | 6.112 |
| -1.074 | 0.296 | 19.000 | 1.007 | 0.476 | 6.112 |
| -0.055 | 0.956 | 19.000 | 0.530 | 0.476 | 6.112 |
| -0.659 | 0.518 | 19.000 | 0.564 | 0.476 | 6.112 |
| 0.628  | 0.537 | 19.000 | 0.289 | 0.476 | 6.112 |
| -1.121 | 0.276 | 19.000 | 0.770 | 0.476 | 6.112 |
| -1.083 | 0.292 | 19.000 | 0.425 | 0.476 | 6.112 |
| -1.752 | 0.096 | 19.000 | 0.388 | 0.476 | 6.112 |
| -2.148 | 0.045 | 19.000 | 0.424 | 0.476 | 6.112 |

|        |       |        |       |       |       |
|--------|-------|--------|-------|-------|-------|
| -1.963 | 0.064 | 19.000 | 0.412 | 0.476 | 6.112 |
| -1.458 | 0.161 | 19.000 | 0.573 | 0.476 | 6.112 |
| 0.505  | 0.620 | 19.000 | 0.425 | 0.476 | 6.112 |
| 4.357  | 0.000 | 19.000 | 0.438 | 0.476 | 6.112 |
| 1.135  | 0.270 | 19.000 | 0.583 | 0.476 | 6.112 |
| 1.645  | 0.116 | 19.000 | 0.428 | 0.476 | 6.112 |
| 1.640  | 0.117 | 19.000 | 0.602 | 0.476 | 6.112 |
| 3.000  | 0.007 | 19.000 | 0.475 | 0.476 | 6.112 |
| -2.048 | 0.055 | 19.000 | 0.458 | 0.476 | 6.112 |
| -0.545 | 0.592 | 19.000 | 0.358 | 0.476 | 6.112 |
| 1.999  | 0.060 | 19.000 | 0.470 | 0.476 | 6.112 |
| -1.950 | 0.066 | 19.000 | 0.558 | 0.476 | 6.112 |
| -0.058 | 0.954 | 19.000 | 0.538 | 0.476 | 6.112 |
| 0.954  | 0.352 | 19.000 | 1.284 | 0.476 | 6.112 |
| 2.408  | 0.026 | 19.000 | 0.651 | 0.476 | 6.112 |
| -1.855 | 0.079 | 19.000 | 0.548 | 0.476 | 6.112 |
| -0.387 | 0.703 | 19.000 | 0.689 | 0.476 | 6.112 |
| -0.223 | 0.826 | 19.000 | 0.472 | 0.476 | 6.112 |
| -1.473 | 0.157 | 19.000 | 0.590 | 0.476 | 6.112 |
| 3.453  | 0.003 | 19.000 | 0.506 | 0.476 | 6.112 |
| 0.183  | 0.857 | 19.000 | 0.526 | 0.476 | 6.112 |
| -1.437 | 0.167 | 19.000 | 0.381 | 0.476 | 6.112 |
| -0.733 | 0.473 | 19.000 | 0.457 | 0.476 | 6.112 |
| 3.377  | 0.003 | 19.000 | 0.476 | 0.476 | 6.112 |
| 2.570  | 0.019 | 19.000 | 0.712 | 0.476 | 6.112 |
| -0.379 | 0.709 | 19.000 | 0.453 | 0.476 | 6.112 |
| 1.129  | 0.273 | 19.000 | 0.574 | 0.476 | 6.112 |
| 0.991  | 0.334 | 19.000 | 0.644 | 0.476 | 6.112 |
| 0.463  | 0.649 | 19.000 | 0.406 | 0.476 | 6.112 |
| 2.437  | 0.025 | 19.000 | 0.396 | 0.476 | 6.112 |
| -1.637 | 0.118 | 19.000 | 0.452 | 0.476 | 6.112 |
| -0.237 | 0.815 | 19.000 | 0.511 | 0.476 | 6.112 |
| 1.608  | 0.124 | 19.000 | 0.479 | 0.476 | 6.112 |
| 2.760  | 0.012 | 19.000 | 0.539 | 0.476 | 6.112 |
| 0.064  | 0.950 | 19.000 | 0.422 | 0.476 | 6.112 |
| 0.150  | 0.883 | 19.000 | 0.443 | 0.476 | 6.112 |
| -2.392 | 0.027 | 19.000 | 0.982 | 0.476 | 6.112 |
| -2.206 | 0.040 | 19.000 | 0.788 | 0.476 | 6.112 |
| -0.180 | 0.859 | 19.000 | 0.500 | 0.476 | 6.112 |
| 0.291  | 0.774 | 19.000 | 0.874 | 0.476 | 6.112 |
| -1.115 | 0.279 | 19.000 | 0.696 | 0.476 | 6.112 |
| 0.058  | 0.955 | 19.000 | 0.445 | 0.476 | 6.112 |
| -1.191 | 0.248 | 19.000 | 0.664 | 0.476 | 6.112 |
| -1.853 | 0.080 | 19.000 | 0.529 | 0.476 | 6.112 |
| -1.335 | 0.198 | 19.000 | 0.423 | 0.476 | 6.112 |
| 2.606  | 0.017 | 19.000 | 1.243 | 0.476 | 6.112 |
| -1.871 | 0.077 | 19.000 | 0.738 | 0.476 | 6.112 |
| -0.894 | 0.383 | 19.000 | 0.569 | 0.476 | 6.112 |
| -0.659 | 0.518 | 19.000 | 0.411 | 0.476 | 6.112 |
| 0.914  | 0.372 | 19.000 | 0.450 | 0.476 | 6.112 |



|        |       |        |       |       |       |
|--------|-------|--------|-------|-------|-------|
| -1.623 | 0.121 | 19.000 | 0.458 | 0.476 | 6.112 |
| -0.732 | 0.473 | 19.000 | 0.457 | 0.476 | 6.112 |
| -0.835 | 0.414 | 19.000 | 0.590 | 0.476 | 6.112 |
| -0.116 | 0.909 | 19.000 | 0.521 | 0.476 | 6.112 |
| -0.573 | 0.573 | 19.000 | 0.787 | 0.476 | 6.112 |
| 0.861  | 0.400 | 19.000 | 0.322 | 0.476 | 6.112 |
| -0.347 | 0.733 | 19.000 | 0.517 | 0.476 | 6.112 |
| 0.774  | 0.448 | 19.000 | 0.371 | 0.476 | 6.112 |
| -0.063 | 0.950 | 19.000 | 0.429 | 0.476 | 6.112 |
| -1.122 | 0.276 | 19.000 | 0.428 | 0.476 | 6.112 |
| 1.561  | 0.135 | 19.000 | 0.465 | 0.476 | 6.112 |
| -2.326 | 0.031 | 19.000 | 0.502 | 0.476 | 6.112 |
| 0.154  | 0.879 | 19.000 | 0.939 | 0.476 | 6.112 |
| -0.286 | 0.778 | 19.000 | 0.675 | 0.476 | 6.112 |
| 1.434  | 0.168 | 19.000 | 0.287 | 0.476 | 6.112 |
| -1.283 | 0.215 | 19.000 | 0.461 | 0.476 | 6.112 |
| 1.256  | 0.224 | 19.000 | 0.531 | 0.476 | 6.112 |
| -0.314 | 0.757 | 19.000 | 0.541 | 0.476 | 6.112 |
| 3.130  | 0.006 | 19.000 | 0.365 | 0.476 | 6.112 |
| -0.975 | 0.342 | 19.000 | 0.456 | 0.476 | 6.112 |
| -0.880 | 0.390 | 19.000 | 0.489 | 0.476 | 6.112 |
| 1.464  | 0.160 | 19.000 | 0.541 | 0.476 | 6.112 |
| 1.236  | 0.232 | 19.000 | 0.405 | 0.476 | 6.112 |
| 0.154  | 0.879 | 19.000 | 0.419 | 0.476 | 6.112 |
| -1.378 | 0.184 | 19.000 | 0.671 | 0.476 | 6.112 |
| 0.845  | 0.408 | 19.000 | 0.826 | 0.476 | 6.112 |
| -0.117 | 0.908 | 19.000 | 0.373 | 0.476 | 6.112 |
| -0.361 | 0.722 | 19.000 | 0.498 | 0.476 | 6.112 |
| 1.044  | 0.310 | 19.000 | 0.685 | 0.476 | 6.112 |
| 1.615  | 0.123 | 19.000 | 0.524 | 0.476 | 6.112 |
| 2.567  | 0.019 | 19.000 | 0.884 | 0.476 | 6.112 |
| -1.300 | 0.209 | 19.000 | 0.439 | 0.476 | 6.112 |
| 1.864  | 0.078 | 19.000 | 0.409 | 0.476 | 6.112 |
| -1.959 | 0.065 | 19.000 | 0.411 | 0.476 | 6.112 |
| -0.730 | 0.474 | 19.000 | 0.542 | 0.476 | 6.112 |
| 1.959  | 0.065 | 19.000 | 0.554 | 0.476 | 6.112 |
| -1.241 | 0.230 | 19.000 | 0.465 | 0.476 | 6.112 |
| 1.257  | 0.224 | 19.000 | 0.420 | 0.476 | 6.112 |
| -1.282 | 0.215 | 19.000 | 0.391 | 0.476 | 6.112 |
| -0.468 | 0.645 | 19.000 | 0.669 | 0.476 | 6.112 |
| -1.838 | 0.082 | 19.000 | 0.751 | 0.476 | 6.112 |
| -0.514 | 0.613 | 19.000 | 0.999 | 0.476 | 6.112 |
| -0.540 | 0.595 | 19.000 | 0.485 | 0.476 | 6.112 |
| 0.207  | 0.838 | 19.000 | 0.505 | 0.476 | 6.112 |
| -2.018 | 0.058 | 19.000 | 1.113 | 0.476 | 6.112 |
| -1.494 | 0.152 | 19.000 | 0.645 | 0.476 | 6.112 |
| -1.805 | 0.087 | 19.000 | 0.539 | 0.476 | 6.112 |
| -2.852 | 0.010 | 19.000 | 0.663 | 0.476 | 6.112 |
| 0.434  | 0.669 | 19.000 | 0.439 | 0.476 | 6.112 |
| -1.367 | 0.188 | 19.000 | 0.326 | 0.476 | 6.112 |

|        |       |        |       |       |       |
|--------|-------|--------|-------|-------|-------|
| 0.186  | 0.854 | 19.000 | 0.403 | 0.476 | 6.112 |
| 1.148  | 0.265 | 19.000 | 0.736 | 0.476 | 6.112 |
| -2.635 | 0.016 | 19.000 | 0.514 | 0.476 | 6.112 |
| -0.274 | 0.787 | 19.000 | 0.467 | 0.476 | 6.112 |
| -1.911 | 0.071 | 19.000 | 0.705 | 0.476 | 6.112 |
| 0.345  | 0.734 | 19.000 | 0.553 | 0.476 | 6.112 |
| -1.444 | 0.165 | 19.000 | 0.492 | 0.476 | 6.112 |
| 1.209  | 0.242 | 19.000 | 0.434 | 0.476 | 6.112 |
| -0.132 | 0.896 | 19.000 | 0.544 | 0.476 | 6.112 |
| -0.151 | 0.882 | 19.000 | 0.486 | 0.476 | 6.112 |
| -0.840 | 0.411 | 19.000 | 0.379 | 0.476 | 6.112 |
| 2.078  | 0.051 | 19.000 | 1.017 | 0.476 | 6.112 |
| -1.757 | 0.095 | 19.000 | 0.719 | 0.476 | 6.112 |
| 1.983  | 0.062 | 19.000 | 0.498 | 0.476 | 6.112 |
| 2.128  | 0.047 | 19.000 | 0.442 | 0.476 | 6.112 |
| -1.356 | 0.191 | 19.000 | 0.668 | 0.476 | 6.112 |
| -1.165 | 0.259 | 19.000 | 0.668 | 0.476 | 6.112 |
| -1.385 | 0.182 | 19.000 | 0.615 | 0.476 | 6.112 |
| 1.167  | 0.258 | 19.000 | 0.384 | 0.476 | 6.112 |
| -0.485 | 0.633 | 19.000 | 0.529 | 0.476 | 6.112 |
| -1.846 | 0.081 | 19.000 | 0.359 | 0.476 | 6.112 |
| -0.853 | 0.404 | 19.000 | 0.634 | 0.476 | 6.112 |
| 0.215  | 0.832 | 19.000 | 0.680 | 0.476 | 6.112 |
| 0.287  | 0.777 | 19.000 | 0.413 | 0.476 | 6.112 |
| 1.092  | 0.288 | 19.000 | 0.399 | 0.476 | 6.112 |
| 2.572  | 0.019 | 19.000 | 0.338 | 0.476 | 6.112 |
| -0.399 | 0.694 | 19.000 | 1.349 | 0.476 | 6.112 |
| 0.062  | 0.952 | 19.000 | 0.523 | 0.476 | 6.112 |
| 0.277  | 0.784 | 19.000 | 0.669 | 0.476 | 6.112 |
| -0.627 | 0.538 | 19.000 | 0.992 | 0.476 | 6.112 |
| 1.252  | 0.226 | 19.000 | 0.457 | 0.476 | 6.112 |
| -2.251 | 0.036 | 19.000 | 0.646 | 0.476 | 6.112 |
| -2.264 | 0.036 | 19.000 | 0.369 | 0.476 | 6.112 |
| -0.332 | 0.743 | 19.000 | 0.489 | 0.476 | 6.112 |
| -0.160 | 0.875 | 19.000 | 0.611 | 0.476 | 6.112 |
| 0.013  | 0.990 | 19.000 | 0.851 | 0.476 | 6.112 |
| -0.060 | 0.953 | 19.000 | 0.474 | 0.476 | 6.112 |
| 0.531  | 0.602 | 19.000 | 0.474 | 0.476 | 6.112 |
| 2.228  | 0.038 | 19.000 | 0.316 | 0.476 | 6.112 |
| 1.280  | 0.216 | 19.000 | 0.632 | 0.476 | 6.112 |
| 1.346  | 0.194 | 19.000 | 0.454 | 0.476 | 6.112 |
| -1.966 | 0.064 | 19.000 | 1.027 | 0.476 | 6.112 |
| -1.279 | 0.216 | 19.000 | 1.005 | 0.476 | 6.112 |
| -0.545 | 0.592 | 19.000 | 0.407 | 0.476 | 6.112 |
| 0.270  | 0.790 | 19.000 | 0.385 | 0.476 | 6.112 |
| -0.086 | 0.932 | 19.000 | 0.727 | 0.476 | 6.112 |
| -0.155 | 0.878 | 19.000 | 0.573 | 0.476 | 6.112 |
| -1.108 | 0.282 | 19.000 | 0.473 | 0.476 | 6.112 |
| 2.493  | 0.022 | 19.000 | 0.784 | 0.476 | 6.112 |
| 0.753  | 0.461 | 19.000 | 0.403 | 0.476 | 6.112 |

|        |       |        |       |       |       |
|--------|-------|--------|-------|-------|-------|
| 2.403  | 0.027 | 19.000 | 0.483 | 0.476 | 6.112 |
| 0.524  | 0.606 | 19.000 | 0.503 | 0.476 | 6.112 |
| -0.138 | 0.892 | 19.000 | 0.597 | 0.476 | 6.112 |
| 2.485  | 0.022 | 19.000 | 0.341 | 0.476 | 6.112 |
| 0.043  | 0.966 | 19.000 | 0.537 | 0.476 | 6.112 |
| -0.684 | 0.502 | 19.000 | 0.430 | 0.476 | 6.112 |
| -0.041 | 0.968 | 19.000 | 0.546 | 0.476 | 6.112 |
| -1.628 | 0.120 | 19.000 | 0.794 | 0.476 | 6.112 |
| -1.827 | 0.083 | 19.000 | 0.445 | 0.476 | 6.112 |
| 0.395  | 0.697 | 19.000 | 0.533 | 0.476 | 6.112 |
| 0.967  | 0.346 | 19.000 | 0.636 | 0.476 | 6.112 |
| 1.968  | 0.064 | 19.000 | 0.400 | 0.476 | 6.112 |
| 1.614  | 0.123 | 19.000 | 0.666 | 0.476 | 6.112 |
| 1.091  | 0.289 | 19.000 | 0.552 | 0.476 | 6.112 |
| 1.223  | 0.236 | 19.000 | 0.330 | 0.476 | 6.112 |
| -1.206 | 0.243 | 19.000 | 0.421 | 0.476 | 6.112 |
| 2.491  | 0.022 | 19.000 | 0.311 | 0.476 | 6.112 |
| 1.124  | 0.275 | 19.000 | 0.366 | 0.476 | 6.112 |
| -3.268 | 0.004 | 19.000 | 0.360 | 0.476 | 6.112 |
| 0.148  | 0.884 | 19.000 | 0.657 | 0.476 | 6.112 |
| -0.081 | 0.936 | 19.000 | 0.496 | 0.476 | 6.112 |
| 1.177  | 0.254 | 19.000 | 0.400 | 0.476 | 6.112 |
| 1.825  | 0.084 | 19.000 | 0.386 | 0.476 | 6.112 |
| 1.908  | 0.072 | 19.000 | 0.560 | 0.476 | 6.112 |
| 1.762  | 0.094 | 19.000 | 0.341 | 0.476 | 6.112 |
| 0.417  | 0.681 | 19.000 | 0.339 | 0.476 | 6.112 |
| -0.898 | 0.380 | 19.000 | 0.515 | 0.476 | 6.112 |
| -2.393 | 0.027 | 19.000 | 0.363 | 0.476 | 6.112 |
| -3.352 | 0.003 | 19.000 | 0.600 | 0.476 | 6.112 |
| 1.600  | 0.126 | 19.000 | 0.782 | 0.476 | 6.112 |
| -1.116 | 0.278 | 19.000 | 0.698 | 0.476 | 6.112 |
| -1.624 | 0.121 | 19.000 | 0.641 | 0.476 | 6.112 |
| -1.330 | 0.199 | 19.000 | 0.554 | 0.476 | 6.112 |
| -2.240 | 0.037 | 19.000 | 0.620 | 0.476 | 6.112 |
| -1.343 | 0.195 | 19.000 | 0.309 | 0.476 | 6.112 |
| 1.883  | 0.075 | 19.000 | 0.567 | 0.476 | 6.112 |
| 0.396  | 0.696 | 19.000 | 0.545 | 0.476 | 6.112 |
| -0.714 | 0.484 | 19.000 | 0.250 | 0.476 | 6.112 |
| 2.272  | 0.035 | 19.000 | 0.401 | 0.476 | 6.112 |
| 2.372  | 0.028 | 19.000 | 0.871 | 0.476 | 6.112 |
| 1.652  | 0.115 | 19.000 | 0.287 | 0.476 | 6.112 |
| 0.268  | 0.792 | 19.000 | 0.606 | 0.476 | 6.112 |
| 0.650  | 0.523 | 19.000 | 0.360 | 0.476 | 6.112 |
| -0.831 | 0.416 | 19.000 | 0.533 | 0.476 | 6.112 |
| -2.101 | 0.049 | 19.000 | 0.621 | 0.476 | 6.112 |
| 1.969  | 0.064 | 19.000 | 0.967 | 0.476 | 6.112 |
| 2.205  | 0.040 | 19.000 | 1.081 | 0.476 | 6.112 |
| 1.684  | 0.109 | 19.000 | 0.903 | 0.476 | 6.112 |
| 0.435  | 0.669 | 19.000 | 0.499 | 0.476 | 6.112 |
| -0.951 | 0.354 | 19.000 | 0.662 | 0.476 | 6.112 |

|        |       |        |       |       |       |
|--------|-------|--------|-------|-------|-------|
| -1.580 | 0.131 | 19.000 | 0.537 | 0.476 | 6.112 |
| 1.640  | 0.118 | 19.000 | 0.557 | 0.476 | 6.112 |
| 2.190  | 0.041 | 19.000 | 0.759 | 0.476 | 6.112 |
| 2.543  | 0.020 | 19.000 | 0.898 | 0.476 | 6.112 |
| 0.364  | 0.720 | 19.000 | 0.606 | 0.476 | 6.112 |
| -2.218 | 0.039 | 19.000 | 0.452 | 0.476 | 6.112 |
| -1.409 | 0.175 | 19.000 | 0.328 | 0.476 | 6.112 |
| 0.229  | 0.822 | 19.000 | 0.296 | 0.476 | 6.112 |
| 1.777  | 0.092 | 19.000 | 0.402 | 0.476 | 6.112 |
| 2.213  | 0.039 | 19.000 | 0.317 | 0.476 | 6.112 |
| -2.515 | 0.021 | 19.000 | 1.171 | 0.476 | 6.112 |
| -1.820 | 0.085 | 19.000 | 0.596 | 0.476 | 6.112 |
| 2.006  | 0.059 | 19.000 | 0.484 | 0.476 | 6.112 |
| -1.907 | 0.072 | 19.000 | 0.448 | 0.476 | 6.112 |
| 1.753  | 0.096 | 19.000 | 0.396 | 0.476 | 6.112 |
| -2.378 | 0.028 | 19.000 | 0.618 | 0.476 | 6.112 |
| 0.096  | 0.925 | 19.000 | 0.666 | 0.476 | 6.112 |
| 2.134  | 0.046 | 19.000 | 0.376 | 0.476 | 6.112 |
| 2.411  | 0.026 | 19.000 | 0.714 | 0.476 | 6.112 |
| -0.166 | 0.870 | 19.000 | 0.424 | 0.476 | 6.112 |
| -0.496 | 0.625 | 19.000 | 0.541 | 0.476 | 6.112 |
| 0.385  | 0.705 | 19.000 | 0.683 | 0.476 | 6.112 |
| -1.953 | 0.066 | 19.000 | 0.507 | 0.476 | 6.112 |
| 0.507  | 0.618 | 19.000 | 0.677 | 0.476 | 6.112 |
| 0.170  | 0.867 | 19.000 | 0.461 | 0.476 | 6.112 |
| 0.099  | 0.922 | 19.000 | 0.449 | 0.476 | 6.112 |
| 2.007  | 0.059 | 19.000 | 0.396 | 0.476 | 6.112 |
| 1.739  | 0.098 | 19.000 | 0.466 | 0.476 | 6.112 |
| 0.957  | 0.351 | 19.000 | 0.427 | 0.476 | 6.112 |
| 1.925  | 0.069 | 19.000 | 0.682 | 0.476 | 6.112 |
| 1.363  | 0.189 | 19.000 | 0.414 | 0.476 | 6.112 |
| -0.426 | 0.675 | 19.000 | 0.625 | 0.476 | 6.112 |
| -0.871 | 0.395 | 19.000 | 0.615 | 0.476 | 6.112 |
| 1.995  | 0.061 | 19.000 | 0.395 | 0.476 | 6.112 |
| 1.402  | 0.177 | 19.000 | 0.371 | 0.476 | 6.112 |
| 1.301  | 0.209 | 19.000 | 0.796 | 0.476 | 6.112 |
| 1.748  | 0.097 | 19.000 | 0.646 | 0.476 | 6.112 |
| 1.828  | 0.083 | 19.000 | 0.308 | 0.476 | 6.112 |
| 2.568  | 0.019 | 19.000 | 0.398 | 0.476 | 6.112 |
| -1.804 | 0.087 | 19.000 | 0.862 | 0.476 | 6.112 |
| 3.215  | 0.005 | 19.000 | 0.520 | 0.476 | 6.112 |
| 1.888  | 0.074 | 19.000 | 0.903 | 0.476 | 6.112 |
| -0.555 | 0.586 | 19.000 | 0.334 | 0.476 | 6.112 |
| 2.215  | 0.039 | 19.000 | 0.700 | 0.476 | 6.112 |
| 1.173  | 0.255 | 19.000 | 0.579 | 0.476 | 6.112 |
| 0.372  | 0.714 | 19.000 | 0.706 | 0.476 | 6.112 |
| -0.662 | 0.516 | 19.000 | 0.521 | 0.476 | 6.112 |
| 2.730  | 0.013 | 19.000 | 0.374 | 0.476 | 6.112 |
| 1.903  | 0.072 | 19.000 | 0.482 | 0.476 | 6.112 |
| 1.447  | 0.164 | 19.000 | 0.500 | 0.476 | 6.112 |

|        |       |        |       |       |       |
|--------|-------|--------|-------|-------|-------|
| -0.091 | 0.928 | 19.000 | 0.477 | 0.476 | 6.112 |
| 0.487  | 0.632 | 19.000 | 0.412 | 0.476 | 6.112 |
| 2.145  | 0.045 | 19.000 | 0.679 | 0.476 | 6.112 |
| 2.437  | 0.025 | 19.000 | 0.647 | 0.476 | 6.112 |
| 1.205  | 0.243 | 19.000 | 0.632 | 0.476 | 6.112 |
| 2.068  | 0.052 | 19.000 | 0.597 | 0.476 | 6.112 |
| 2.150  | 0.045 | 19.000 | 0.781 | 0.476 | 6.112 |
| 1.014  | 0.323 | 19.000 | 0.604 | 0.476 | 6.112 |
| 2.466  | 0.023 | 19.000 | 0.588 | 0.476 | 6.112 |
| -0.596 | 0.558 | 19.000 | 0.346 | 0.476 | 6.112 |
| -1.568 | 0.133 | 19.000 | 0.451 | 0.476 | 6.112 |
| 0.495  | 0.626 | 19.000 | 0.405 | 0.476 | 6.112 |
| -0.877 | 0.391 | 19.000 | 0.402 | 0.476 | 6.112 |
| -2.942 | 0.008 | 19.000 | 0.528 | 0.476 | 6.112 |
| -1.532 | 0.142 | 19.000 | 0.456 | 0.476 | 6.112 |
| -1.485 | 0.154 | 19.000 | 0.468 | 0.476 | 6.112 |
| -1.437 | 0.167 | 19.000 | 0.468 | 0.476 | 6.112 |
| -1.354 | 0.192 | 19.000 | 0.502 | 0.476 | 6.112 |
| -1.337 | 0.197 | 19.000 | 0.463 | 0.476 | 6.112 |
| -1.298 | 0.210 | 19.000 | 0.488 | 0.476 | 6.112 |
| -0.115 | 0.910 | 19.000 | 0.521 | 0.476 | 6.112 |
| -0.374 | 0.713 | 19.000 | 0.390 | 0.476 | 6.112 |
| 0.770  | 0.451 | 19.000 | 0.357 | 0.476 | 6.112 |
| -1.704 | 0.105 | 19.000 | 0.298 | 0.476 | 6.112 |
| 1.057  | 0.304 | 19.000 | 0.608 | 0.476 | 6.112 |
| -1.020 | 0.321 | 19.000 | 0.386 | 0.476 | 6.112 |
| -0.239 | 0.814 | 19.000 | 1.375 | 0.476 | 6.112 |
| 0.260  | 0.798 | 19.000 | 0.419 | 0.476 | 6.112 |
| -0.619 | 0.543 | 19.000 | 0.764 | 0.476 | 6.112 |
| 2.133  | 0.046 | 19.000 | 0.598 | 0.476 | 6.112 |
| 0.546  | 0.591 | 19.000 | 0.492 | 0.476 | 6.112 |
| 1.837  | 0.082 | 19.000 | 0.554 | 0.476 | 6.112 |
| -1.615 | 0.123 | 19.000 | 0.540 | 0.476 | 6.112 |
| 1.169  | 0.257 | 19.000 | 0.463 | 0.476 | 6.112 |
| 2.257  | 0.036 | 19.000 | 0.538 | 0.476 | 6.112 |
| -0.052 | 0.959 | 19.000 | 0.418 | 0.476 | 6.112 |
| -0.958 | 0.350 | 19.000 | 0.808 | 0.476 | 6.112 |
| 1.914  | 0.071 | 19.000 | 0.866 | 0.476 | 6.112 |
| -0.980 | 0.340 | 19.000 | 0.479 | 0.476 | 6.112 |
| -1.780 | 0.091 | 19.000 | 0.334 | 0.476 | 6.112 |
| -0.070 | 0.945 | 19.000 | 0.585 | 0.476 | 6.112 |
| 1.701  | 0.105 | 19.000 | 0.399 | 0.476 | 6.112 |
| -1.704 | 0.105 | 19.000 | 0.547 | 0.476 | 6.112 |
| 1.064  | 0.301 | 19.000 | 0.355 | 0.476 | 6.112 |
| 2.380  | 0.028 | 19.000 | 0.760 | 0.476 | 6.112 |
| 0.098  | 0.923 | 19.000 | 0.314 | 0.476 | 6.112 |
| 2.546  | 0.020 | 19.000 | 0.425 | 0.476 | 6.112 |
| 0.263  | 0.796 | 19.000 | 0.436 | 0.476 | 6.112 |
| -0.478 | 0.638 | 19.000 | 0.542 | 0.476 | 6.112 |
| 1.472  | 0.157 | 19.000 | 0.920 | 0.476 | 6.112 |

|        |       |        |       |       |       |
|--------|-------|--------|-------|-------|-------|
| -0.764 | 0.455 | 19.000 | 0.936 | 0.476 | 6.112 |
| 2.356  | 0.029 | 19.000 | 0.312 | 0.476 | 6.112 |
| 1.987  | 0.062 | 19.000 | 0.887 | 0.476 | 6.112 |
| -2.770 | 0.012 | 19.000 | 0.403 | 0.476 | 6.112 |
| 2.344  | 0.030 | 19.000 | 0.536 | 0.476 | 6.112 |
| 0.170  | 0.867 | 19.000 | 0.345 | 0.476 | 6.112 |
| -0.850 | 0.406 | 19.000 | 0.697 | 0.476 | 6.112 |
| -1.689 | 0.108 | 19.000 | 1.453 | 0.476 | 6.112 |
| 3.054  | 0.007 | 19.000 | 0.313 | 0.476 | 6.112 |
| 1.029  | 0.316 | 19.000 | 0.377 | 0.476 | 6.112 |
| -2.079 | 0.051 | 19.000 | 0.444 | 0.476 | 6.112 |
| 2.105  | 0.049 | 19.000 | 0.355 | 0.476 | 6.112 |
| 3.386  | 0.003 | 19.000 | 0.370 | 0.476 | 6.112 |
| 0.530  | 0.602 | 19.000 | 0.529 | 0.476 | 6.112 |
| 1.533  | 0.142 | 19.000 | 0.359 | 0.476 | 6.112 |
| -0.156 | 0.878 | 19.000 | 0.563 | 0.476 | 6.112 |
| -1.227 | 0.235 | 19.000 | 0.603 | 0.476 | 6.112 |
| -1.923 | 0.070 | 19.000 | 0.999 | 0.476 | 6.112 |
| 1.515  | 0.146 | 19.000 | 0.415 | 0.476 | 6.112 |
| 1.497  | 0.151 | 19.000 | 0.538 | 0.476 | 6.112 |
| 1.417  | 0.173 | 19.000 | 0.756 | 0.476 | 6.112 |
| 0.200  | 0.844 | 19.000 | 0.299 | 0.476 | 6.112 |
| -0.594 | 0.559 | 19.000 | 0.381 | 0.476 | 6.112 |
| 1.033  | 0.315 | 19.000 | 0.304 | 0.476 | 6.112 |
| -2.256 | 0.036 | 19.000 | 0.403 | 0.476 | 6.112 |
| -1.567 | 0.134 | 19.000 | 0.621 | 0.476 | 6.112 |
| 2.125  | 0.047 | 19.000 | 0.479 | 0.476 | 6.112 |
| 0.678  | 0.506 | 19.000 | 0.425 | 0.476 | 6.112 |
| -2.294 | 0.033 | 19.000 | 0.390 | 0.476 | 6.112 |
| 0.829  | 0.417 | 19.000 | 0.362 | 0.476 | 6.112 |
| -2.601 | 0.018 | 19.000 | 0.713 | 0.476 | 6.112 |
| 2.607  | 0.017 | 19.000 | 1.111 | 0.476 | 6.112 |
| -1.469 | 0.158 | 19.000 | 0.347 | 0.476 | 6.112 |
| 0.741  | 0.467 | 19.000 | 0.548 | 0.476 | 6.112 |
| 3.069  | 0.006 | 19.000 | 0.542 | 0.476 | 6.112 |
| -1.181 | 0.252 | 19.000 | 0.320 | 0.476 | 6.112 |
| -1.740 | 0.098 | 19.000 | 0.405 | 0.476 | 6.112 |
| -2.295 | 0.033 | 19.000 | 0.309 | 0.476 | 6.112 |
| 1.139  | 0.269 | 19.000 | 0.619 | 0.476 | 6.112 |
| 1.325  | 0.201 | 19.000 | 0.312 | 0.476 | 6.112 |
| -0.620 | 0.542 | 19.000 | 0.494 | 0.476 | 6.112 |
| 0.399  | 0.695 | 19.000 | 0.557 | 0.476 | 6.112 |
| -2.507 | 0.021 | 19.000 | 0.665 | 0.476 | 6.112 |
| -1.522 | 0.144 | 19.000 | 0.453 | 0.476 | 6.112 |
| 0.547  | 0.591 | 19.000 | 0.320 | 0.476 | 6.112 |
| -0.148 | 0.884 | 19.000 | 0.413 | 0.476 | 6.112 |
| 2.304  | 0.033 | 19.000 | 0.318 | 0.476 | 6.112 |
| 0.176  | 0.862 | 19.000 | 0.456 | 0.476 | 6.112 |
| 1.585  | 0.129 | 19.000 | 0.393 | 0.476 | 6.112 |
| -1.265 | 0.221 | 19.000 | 0.632 | 0.476 | 6.112 |

|        |       |        |       |       |       |
|--------|-------|--------|-------|-------|-------|
| 1.904  | 0.072 | 19.000 | 0.752 | 0.476 | 6.112 |
| 2.782  | 0.012 | 19.000 | 0.463 | 0.476 | 6.112 |
| 2.372  | 0.028 | 19.000 | 0.456 | 0.476 | 6.112 |
| 0.185  | 0.855 | 19.000 | 0.373 | 0.476 | 6.112 |
| 2.398  | 0.027 | 19.000 | 0.452 | 0.476 | 6.112 |
| -2.652 | 0.016 | 19.000 | 0.446 | 0.476 | 6.112 |
| -0.715 | 0.483 | 19.000 | 0.368 | 0.476 | 6.112 |
| 2.520  | 0.021 | 19.000 | 0.345 | 0.476 | 6.112 |
| -0.992 | 0.334 | 19.000 | 0.982 | 0.476 | 6.112 |
| -0.290 | 0.775 | 19.000 | 0.737 | 0.476 | 6.112 |
| 2.330  | 0.031 | 19.000 | 0.737 | 0.476 | 6.112 |
| -2.606 | 0.017 | 19.000 | 0.283 | 0.476 | 6.112 |
| -1.419 | 0.172 | 19.000 | 0.417 | 0.476 | 6.112 |
| 1.739  | 0.098 | 19.000 | 0.411 | 0.476 | 6.112 |
| -2.584 | 0.018 | 19.000 | 0.450 | 0.476 | 6.112 |
| -2.765 | 0.012 | 19.000 | 0.380 | 0.476 | 6.112 |
| 1.614  | 0.123 | 19.000 | 0.452 | 0.476 | 6.112 |
| -2.727 | 0.013 | 19.000 | 0.431 | 0.476 | 6.112 |
| -2.957 | 0.008 | 19.000 | 0.446 | 0.476 | 6.112 |
| 1.281  | 0.216 | 19.000 | 1.397 | 0.476 | 6.112 |
| -0.804 | 0.432 | 19.000 | 0.316 | 0.476 | 6.112 |
| 2.591  | 0.018 | 19.000 | 0.461 | 0.476 | 6.112 |
| 0.381  | 0.707 | 19.000 | 0.646 | 0.476 | 6.112 |
| 2.639  | 0.016 | 19.000 | 0.536 | 0.476 | 6.112 |
| 1.984  | 0.062 | 19.000 | 0.256 | 0.476 | 6.112 |
| -1.207 | 0.242 | 19.000 | 0.417 | 0.476 | 6.112 |
| 0.892  | 0.384 | 19.000 | 0.369 | 0.476 | 6.112 |
| 0.201  | 0.843 | 19.000 | 0.501 | 0.476 | 6.112 |
| 2.001  | 0.060 | 19.000 | 0.637 | 0.476 | 6.112 |
| 2.493  | 0.022 | 19.000 | 0.372 | 0.476 | 6.112 |
| -2.824 | 0.011 | 19.000 | 0.313 | 0.476 | 6.112 |
| -0.234 | 0.817 | 19.000 | 0.330 | 0.476 | 6.112 |
| 2.266  | 0.035 | 19.000 | 0.423 | 0.476 | 6.112 |
| -1.051 | 0.307 | 19.000 | 0.464 | 0.476 | 6.112 |
| 3.642  | 0.002 | 19.000 | 0.335 | 0.476 | 6.112 |
| -0.170 | 0.867 | 19.000 | 0.473 | 0.476 | 6.112 |
| 1.674  | 0.110 | 19.000 | 0.540 | 0.476 | 6.112 |
| -2.326 | 0.031 | 19.000 | 0.682 | 0.476 | 6.112 |
| 1.530  | 0.143 | 19.000 | 0.784 | 0.476 | 6.112 |
| -2.405 | 0.027 | 19.000 | 0.280 | 0.476 | 6.112 |
| -1.443 | 0.165 | 19.000 | 0.379 | 0.476 | 6.112 |
| -0.526 | 0.605 | 19.000 | 0.441 | 0.476 | 6.112 |
| 2.168  | 0.043 | 19.000 | 0.420 | 0.476 | 6.112 |
| 2.420  | 0.026 | 19.000 | 0.340 | 0.476 | 6.112 |
| 2.607  | 0.017 | 19.000 | 1.203 | 0.476 | 6.112 |
| -0.848 | 0.407 | 19.000 | 0.616 | 0.476 | 6.112 |
| 1.499  | 0.150 | 19.000 | 0.801 | 0.476 | 6.112 |
| 2.187  | 0.041 | 19.000 | 0.486 | 0.476 | 6.112 |
| 2.610  | 0.017 | 19.000 | 0.429 | 0.476 | 6.112 |
| 1.453  | 0.163 | 19.000 | 0.487 | 0.476 | 6.112 |

|        |       |        |       |       |       |
|--------|-------|--------|-------|-------|-------|
| -2.031 | 0.056 | 19.000 | 0.402 | 0.476 | 6.112 |
| 2.672  | 0.015 | 19.000 | 0.497 | 0.476 | 6.112 |
| -0.660 | 0.517 | 19.000 | 0.474 | 0.476 | 6.112 |
| -1.463 | 0.160 | 19.000 | 0.249 | 0.476 | 6.112 |
| 0.909  | 0.375 | 19.000 | 0.627 | 0.476 | 6.112 |
| -2.557 | 0.019 | 19.000 | 0.347 | 0.476 | 6.112 |
| -0.762 | 0.456 | 19.000 | 0.462 | 0.476 | 6.112 |
| 1.783  | 0.091 | 19.000 | 0.492 | 0.476 | 6.112 |
| -2.218 | 0.039 | 19.000 | 0.340 | 0.476 | 6.112 |
| 2.372  | 0.028 | 19.000 | 0.387 | 0.476 | 6.112 |
| 0.730  | 0.474 | 19.000 | 0.323 | 0.476 | 6.112 |
| -1.726 | 0.101 | 19.000 | 0.652 | 0.476 | 6.112 |
| -2.799 | 0.011 | 19.000 | 1.014 | 0.476 | 6.112 |
| 1.938  | 0.068 | 19.000 | 0.300 | 0.476 | 6.112 |
| -1.686 | 0.108 | 19.000 | 0.345 | 0.476 | 6.112 |
| 0.547  | 0.591 | 19.000 | 0.254 | 0.476 | 6.112 |
| 1.120  | 0.277 | 19.000 | 0.445 | 0.476 | 6.112 |
| 2.064  | 0.053 | 19.000 | 0.766 | 0.476 | 6.112 |
| -0.135 | 0.894 | 19.000 | 0.597 | 0.476 | 6.112 |
| 0.310  | 0.760 | 19.000 | 0.524 | 0.476 | 6.112 |
| -0.992 | 0.334 | 19.000 | 0.368 | 0.476 | 6.112 |
| -0.001 | 0.999 | 19.000 | 0.829 | 0.476 | 6.112 |
| 1.098  | 0.286 | 19.000 | 0.671 | 0.476 | 6.112 |
| 2.623  | 0.017 | 19.000 | 0.458 | 0.476 | 6.112 |
| 0.109  | 0.915 | 19.000 | 0.602 | 0.476 | 6.112 |
| 2.144  | 0.045 | 19.000 | 0.563 | 0.476 | 6.112 |
| 2.917  | 0.009 | 19.000 | 1.394 | 0.476 | 6.112 |
| -0.945 | 0.356 | 19.000 | 0.315 | 0.476 | 6.112 |
| 1.675  | 0.110 | 19.000 | 0.392 | 0.476 | 6.112 |
| -1.158 | 0.261 | 19.000 | 0.712 | 0.476 | 6.112 |
| 2.034  | 0.056 | 19.000 | 0.409 | 0.476 | 6.112 |
| -2.964 | 0.008 | 19.000 | 0.411 | 0.476 | 6.112 |
| -0.410 | 0.686 | 19.000 | 0.319 | 0.476 | 6.112 |
| 2.954  | 0.008 | 19.000 | 0.649 | 0.476 | 6.112 |
| 1.812  | 0.086 | 19.000 | 0.493 | 0.476 | 6.112 |
| 1.933  | 0.068 | 19.000 | 0.310 | 0.476 | 6.112 |
| -1.570 | 0.133 | 19.000 | 0.427 | 0.476 | 6.112 |
| 1.808  | 0.086 | 19.000 | 0.464 | 0.476 | 6.112 |
| 2.507  | 0.021 | 19.000 | 0.446 | 0.476 | 6.112 |
| -0.812 | 0.427 | 19.000 | 0.496 | 0.476 | 6.112 |
| -1.701 | 0.105 | 19.000 | 0.392 | 0.476 | 6.112 |
| -0.738 | 0.469 | 19.000 | 0.488 | 0.476 | 6.112 |
| -2.243 | 0.037 | 19.000 | 0.340 | 0.476 | 6.112 |
| 2.239  | 0.037 | 19.000 | 0.434 | 0.476 | 6.112 |
| 2.305  | 0.033 | 19.000 | 0.237 | 0.476 | 6.112 |
| 3.421  | 0.003 | 19.000 | 0.446 | 0.476 | 6.112 |
| 0.387  | 0.703 | 19.000 | 0.431 | 0.476 | 6.112 |
| 2.885  | 0.009 | 19.000 | 0.235 | 0.476 | 6.112 |
| 0.276  | 0.786 | 19.000 | 0.947 | 0.476 | 6.112 |
| 2.871  | 0.010 | 19.000 | 0.807 | 0.476 | 6.112 |



|        |       |        |       |       |       |
|--------|-------|--------|-------|-------|-------|
| 1.996  | 0.061 | 19.000 | 0.341 | 0.476 | 6.112 |
| 2.160  | 0.044 | 19.000 | 1.443 | 0.476 | 6.112 |
| 2.069  | 0.052 | 19.000 | 0.540 | 0.476 | 6.112 |
| 1.212  | 0.240 | 19.000 | 0.581 | 0.476 | 6.112 |
| -2.728 | 0.013 | 19.000 | 0.525 | 0.476 | 6.112 |
| -3.752 | 0.001 | 19.000 | 0.503 | 0.476 | 6.112 |
| 0.777  | 0.447 | 19.000 | 0.568 | 0.476 | 6.112 |
| -1.219 | 0.238 | 19.000 | 0.541 | 0.476 | 6.112 |
| 2.213  | 0.039 | 19.000 | 1.070 | 0.476 | 6.112 |
| 0.242  | 0.812 | 19.000 | 0.467 | 0.476 | 6.112 |
| 2.068  | 0.053 | 19.000 | 0.514 | 0.476 | 6.112 |
| -1.099 | 0.285 | 19.000 | 0.719 | 0.476 | 6.112 |
| 1.740  | 0.098 | 19.000 | 0.271 | 0.476 | 6.112 |
| -1.651 | 0.115 | 19.000 | 0.492 | 0.476 | 6.112 |
| 1.339  | 0.196 | 19.000 | 0.499 | 0.476 | 6.112 |
| 0.237  | 0.815 | 19.000 | 0.440 | 0.476 | 6.112 |
| 0.699  | 0.493 | 19.000 | 0.323 | 0.476 | 6.112 |
| 0.029  | 0.977 | 19.000 | 0.374 | 0.476 | 6.112 |
| -1.894 | 0.074 | 19.000 | 0.399 | 0.476 | 6.112 |
| -1.148 | 0.265 | 19.000 | 0.397 | 0.476 | 6.112 |
| 0.058  | 0.954 | 19.000 | 0.289 | 0.476 | 6.112 |
| 0.812  | 0.427 | 19.000 | 0.299 | 0.476 | 6.112 |
| -1.551 | 0.137 | 19.000 | 0.415 | 0.476 | 6.112 |
| 1.657  | 0.114 | 19.000 | 0.583 | 0.476 | 6.112 |
| 0.755  | 0.460 | 19.000 | 0.329 | 0.476 | 6.112 |
| 1.266  | 0.221 | 19.000 | 0.330 | 0.476 | 6.112 |
| -0.717 | 0.482 | 19.000 | 0.700 | 0.476 | 6.112 |
| 2.966  | 0.008 | 19.000 | 0.580 | 0.476 | 6.112 |
| 1.712  | 0.103 | 19.000 | 0.509 | 0.476 | 6.112 |
| -0.451 | 0.657 | 19.000 | 0.592 | 0.476 | 6.112 |
| 0.172  | 0.866 | 19.000 | 0.448 | 0.476 | 6.112 |
| -0.700 | 0.493 | 19.000 | 0.436 | 0.476 | 6.112 |
| 1.055  | 0.305 | 19.000 | 0.371 | 0.476 | 6.112 |
| 1.994  | 0.061 | 19.000 | 0.889 | 0.476 | 6.112 |
| 0.503  | 0.621 | 19.000 | 0.389 | 0.476 | 6.112 |
| 0.225  | 0.824 | 19.000 | 0.399 | 0.476 | 6.112 |
| -0.752 | 0.462 | 19.000 | 0.306 | 0.476 | 6.112 |
| 2.462  | 0.024 | 19.000 | 0.317 | 0.476 | 6.112 |
| 0.901  | 0.379 | 19.000 | 0.479 | 0.476 | 6.112 |
| 2.595  | 0.018 | 19.000 | 0.956 | 0.476 | 6.112 |
| 0.250  | 0.805 | 19.000 | 0.534 | 0.476 | 6.112 |
| -1.029 | 0.316 | 19.000 | 0.611 | 0.476 | 6.112 |
| -2.048 | 0.055 | 19.000 | 0.470 | 0.476 | 6.112 |
| -1.604 | 0.125 | 19.000 | 0.712 | 0.476 | 6.112 |
| -1.218 | 0.238 | 19.000 | 0.624 | 0.476 | 6.112 |
| -2.255 | 0.036 | 19.000 | 0.399 | 0.476 | 6.112 |
| 0.647  | 0.525 | 19.000 | 0.485 | 0.476 | 6.112 |
| 1.456  | 0.162 | 19.000 | 0.315 | 0.476 | 6.112 |
| -1.832 | 0.083 | 19.000 | 0.864 | 0.476 | 6.112 |
| -1.317 | 0.204 | 19.000 | 0.438 | 0.476 | 6.112 |

|        |       |        |       |       |       |
|--------|-------|--------|-------|-------|-------|
| 2.413  | 0.026 | 19.000 | 0.373 | 0.476 | 6.112 |
| -1.311 | 0.205 | 19.000 | 0.388 | 0.476 | 6.112 |
| 0.628  | 0.538 | 19.000 | 0.717 | 0.476 | 6.112 |
| 0.095  | 0.926 | 19.000 | 0.356 | 0.476 | 6.112 |
| 0.169  | 0.868 | 19.000 | 0.413 | 0.476 | 6.112 |
| 0.796  | 0.436 | 19.000 | 0.393 | 0.476 | 6.112 |
| 0.782  | 0.444 | 19.000 | 0.393 | 0.476 | 6.112 |
| 2.698  | 0.014 | 19.000 | 0.688 | 0.476 | 6.112 |
| -1.880 | 0.076 | 19.000 | 0.550 | 0.476 | 6.112 |
| 0.024  | 0.981 | 19.000 | 0.405 | 0.476 | 6.112 |
| 1.093  | 0.288 | 19.000 | 0.248 | 0.476 | 6.112 |
| 2.401  | 0.027 | 19.000 | 0.443 | 0.476 | 6.112 |
| -2.844 | 0.010 | 19.000 | 0.416 | 0.476 | 6.112 |
| 0.416  | 0.682 | 19.000 | 0.365 | 0.476 | 6.112 |
| -1.561 | 0.135 | 19.000 | 0.432 | 0.476 | 6.112 |
| -0.693 | 0.497 | 19.000 | 0.633 | 0.476 | 6.112 |
| -0.588 | 0.564 | 19.000 | 0.443 | 0.476 | 6.112 |
| -1.037 | 0.313 | 19.000 | 0.435 | 0.476 | 6.112 |
| -2.429 | 0.025 | 19.000 | 0.600 | 0.476 | 6.112 |
| 1.954  | 0.066 | 19.000 | 0.314 | 0.476 | 6.112 |
| -0.987 | 0.336 | 19.000 | 0.789 | 0.476 | 6.112 |
| -0.814 | 0.426 | 19.000 | 0.456 | 0.476 | 6.112 |
| 0.197  | 0.846 | 19.000 | 0.562 | 0.476 | 6.112 |
| 1.023  | 0.319 | 19.000 | 0.467 | 0.476 | 6.112 |
| -0.753 | 0.461 | 19.000 | 0.803 | 0.476 | 6.112 |
| -0.281 | 0.782 | 19.000 | 0.691 | 0.476 | 6.112 |
| -0.212 | 0.834 | 19.000 | 0.575 | 0.476 | 6.112 |
| 2.665  | 0.015 | 19.000 | 0.948 | 0.476 | 6.112 |
| -0.919 | 0.370 | 19.000 | 0.898 | 0.476 | 6.112 |
| -1.626 | 0.120 | 19.000 | 0.550 | 0.476 | 6.112 |
| -0.541 | 0.595 | 19.000 | 0.639 | 0.476 | 6.112 |
| 0.998  | 0.331 | 19.000 | 0.576 | 0.476 | 6.112 |
| 0.709  | 0.487 | 19.000 | 0.538 | 0.476 | 6.112 |
| 0.389  | 0.701 | 19.000 | 0.426 | 0.476 | 6.112 |
| -0.031 | 0.976 | 19.000 | 0.447 | 0.476 | 6.112 |
| 0.494  | 0.627 | 19.000 | 0.748 | 0.476 | 6.112 |
| -0.636 | 0.532 | 19.000 | 0.539 | 0.476 | 6.112 |
| -0.101 | 0.921 | 19.000 | 0.525 | 0.476 | 6.112 |
| 2.818  | 0.011 | 19.000 | 0.488 | 0.476 | 6.112 |
| 0.010  | 0.992 | 19.000 | 0.440 | 0.476 | 6.112 |
| 1.741  | 0.098 | 19.000 | 0.424 | 0.476 | 6.112 |
| 1.502  | 0.150 | 19.000 | 0.622 | 0.476 | 6.112 |
| 0.369  | 0.716 | 19.000 | 0.635 | 0.476 | 6.112 |
| -1.434 | 0.168 | 19.000 | 0.753 | 0.476 | 6.112 |
| 0.180  | 0.859 | 19.000 | 0.468 | 0.476 | 6.112 |
| -1.674 | 0.111 | 19.000 | 0.356 | 0.476 | 6.112 |
| -0.323 | 0.750 | 19.000 | 0.955 | 0.476 | 6.112 |
| -1.914 | 0.071 | 19.000 | 0.506 | 0.476 | 6.112 |
| -0.624 | 0.540 | 19.000 | 0.794 | 0.476 | 6.112 |
| 0.565  | 0.579 | 19.000 | 0.475 | 0.476 | 6.112 |

|        |       |        |       |       |       |
|--------|-------|--------|-------|-------|-------|
| -0.055 | 0.957 | 19.000 | 0.418 | 0.476 | 6.112 |
| -0.818 | 0.424 | 19.000 | 0.510 | 0.476 | 6.112 |
| -0.114 | 0.911 | 19.000 | 0.411 | 0.476 | 6.112 |
| 0.537  | 0.597 | 19.000 | 0.481 | 0.476 | 6.112 |
| 0.774  | 0.449 | 19.000 | 0.591 | 0.476 | 6.112 |
| 0.342  | 0.736 | 19.000 | 0.621 | 0.476 | 6.112 |
| -0.643 | 0.528 | 19.000 | 0.738 | 0.476 | 6.112 |
| -0.945 | 0.357 | 19.000 | 0.954 | 0.476 | 6.112 |
| -1.601 | 0.126 | 19.000 | 0.577 | 0.476 | 6.112 |
| -0.881 | 0.389 | 19.000 | 0.436 | 0.476 | 6.112 |
| 2.852  | 0.010 | 19.000 | 0.361 | 0.476 | 6.112 |
| -0.733 | 0.472 | 19.000 | 0.607 | 0.476 | 6.112 |
| 2.942  | 0.008 | 19.000 | 0.403 | 0.476 | 6.112 |
| 1.644  | 0.117 | 19.000 | 0.538 | 0.476 | 6.112 |
| 1.225  | 0.236 | 19.000 | 0.490 | 0.476 | 6.112 |
| 0.329  | 0.746 | 19.000 | 0.731 | 0.476 | 6.112 |
| -0.250 | 0.806 | 19.000 | 0.681 | 0.476 | 6.112 |
| 0.873  | 0.394 | 19.000 | 0.460 | 0.476 | 6.112 |
| -1.309 | 0.206 | 19.000 | 0.726 | 0.476 | 6.112 |
| -1.722 | 0.101 | 19.000 | 0.413 | 0.476 | 6.112 |
| -0.783 | 0.443 | 19.000 | 0.663 | 0.476 | 6.112 |
| 0.956  | 0.351 | 19.000 | 0.675 | 0.476 | 6.112 |
| -2.551 | 0.020 | 19.000 | 0.488 | 0.476 | 6.112 |
| 1.135  | 0.270 | 19.000 | 0.635 | 0.476 | 6.112 |
| 0.601  | 0.555 | 19.000 | 0.629 | 0.476 | 6.112 |
| 0.606  | 0.552 | 19.000 | 0.414 | 0.476 | 6.112 |
| -0.409 | 0.687 | 19.000 | 0.589 | 0.476 | 6.112 |
| -0.556 | 0.585 | 19.000 | 0.617 | 0.476 | 6.112 |
| -0.708 | 0.487 | 19.000 | 0.446 | 0.476 | 6.112 |
| -1.136 | 0.270 | 19.000 | 0.406 | 0.476 | 6.112 |
| 0.545  | 0.592 | 19.000 | 0.432 | 0.476 | 6.112 |
| -0.318 | 0.754 | 19.000 | 0.616 | 0.476 | 6.112 |
| 0.192  | 0.850 | 19.000 | 0.518 | 0.476 | 6.112 |
| 0.112  | 0.912 | 19.000 | 0.447 | 0.476 | 6.112 |
| 2.257  | 0.036 | 19.000 | 0.641 | 0.476 | 6.112 |
| 1.932  | 0.068 | 19.000 | 0.479 | 0.476 | 6.112 |
| -0.430 | 0.672 | 19.000 | 0.478 | 0.476 | 6.112 |
| -2.341 | 0.030 | 19.000 | 0.477 | 0.476 | 6.112 |
| -1.247 | 0.228 | 19.000 | 0.514 | 0.476 | 6.112 |
| -0.636 | 0.532 | 19.000 | 0.535 | 0.476 | 6.112 |
| 0.983  | 0.338 | 19.000 | 0.673 | 0.476 | 6.112 |
| 0.153  | 0.880 | 19.000 | 0.545 | 0.476 | 6.112 |
| 2.066  | 0.053 | 19.000 | 0.512 | 0.476 | 6.112 |
| -1.412 | 0.174 | 19.000 | 0.661 | 0.476 | 6.112 |
| 0.120  | 0.906 | 19.000 | 0.544 | 0.476 | 6.112 |
| 2.064  | 0.053 | 19.000 | 0.356 | 0.476 | 6.112 |
| -0.186 | 0.855 | 19.000 | 0.616 | 0.476 | 6.112 |
| -1.807 | 0.087 | 19.000 | 0.431 | 0.476 | 6.112 |
| -1.271 | 0.219 | 19.000 | 0.526 | 0.476 | 6.112 |
| 0.408  | 0.688 | 19.000 | 0.537 | 0.476 | 6.112 |

|        |       |        |       |       |       |
|--------|-------|--------|-------|-------|-------|
| -1.224 | 0.236 | 19.000 | 0.466 | 0.476 | 6.112 |
| 0.178  | 0.861 | 19.000 | 0.435 | 0.476 | 6.112 |
| -0.788 | 0.440 | 19.000 | 0.508 | 0.476 | 6.112 |
| 0.634  | 0.534 | 19.000 | 0.405 | 0.476 | 6.112 |
| -0.017 | 0.987 | 19.000 | 0.364 | 0.476 | 6.112 |
| -0.947 | 0.356 | 19.000 | 0.516 | 0.476 | 6.112 |
| -1.000 | 0.330 | 19.000 | 0.576 | 0.476 | 6.112 |
| -1.310 | 0.206 | 19.000 | 0.755 | 0.476 | 6.112 |
| -0.466 | 0.647 | 19.000 | 0.521 | 0.476 | 6.112 |
| 1.956  | 0.065 | 19.000 | 0.809 | 0.476 | 6.112 |
| -1.452 | 0.163 | 19.000 | 0.563 | 0.476 | 6.112 |
| 0.152  | 0.881 | 19.000 | 0.386 | 0.476 | 6.112 |
| 0.387  | 0.703 | 19.000 | 0.463 | 0.476 | 6.112 |
| 1.329  | 0.200 | 19.000 | 0.548 | 0.476 | 6.112 |
| -0.103 | 0.919 | 19.000 | 0.456 | 0.476 | 6.112 |
| -0.328 | 0.747 | 19.000 | 0.552 | 0.476 | 6.112 |
| 0.615  | 0.546 | 19.000 | 0.514 | 0.476 | 6.112 |
| -0.067 | 0.948 | 19.000 | 0.730 | 0.476 | 6.112 |
| -0.863 | 0.399 | 19.000 | 0.815 | 0.476 | 6.112 |
| -1.309 | 0.206 | 19.000 | 0.540 | 0.476 | 6.112 |
| -0.829 | 0.418 | 19.000 | 0.812 | 0.476 | 6.112 |
| -1.464 | 0.160 | 19.000 | 0.516 | 0.476 | 6.112 |
| -1.137 | 0.270 | 19.000 | 0.432 | 0.476 | 6.112 |
| -0.138 | 0.892 | 19.000 | 0.580 | 0.476 | 6.112 |
| 0.816  | 0.425 | 19.000 | 0.657 | 0.476 | 6.112 |
| -0.594 | 0.560 | 19.000 | 0.490 | 0.476 | 6.112 |
| -0.639 | 0.530 | 19.000 | 0.557 | 0.476 | 6.112 |
| -1.762 | 0.094 | 19.000 | 0.954 | 0.476 | 6.112 |
| -2.193 | 0.041 | 19.000 | 0.841 | 0.476 | 6.112 |
| 0.785  | 0.442 | 19.000 | 0.503 | 0.476 | 6.112 |
| -0.981 | 0.339 | 19.000 | 0.736 | 0.476 | 6.112 |
| -1.352 | 0.192 | 19.000 | 0.567 | 0.476 | 6.112 |
| -1.211 | 0.241 | 19.000 | 0.447 | 0.476 | 6.112 |
| -1.335 | 0.197 | 19.000 | 0.417 | 0.476 | 6.112 |
| -0.645 | 0.527 | 19.000 | 0.530 | 0.476 | 6.112 |
| 0.658  | 0.518 | 19.000 | 0.469 | 0.476 | 6.112 |
| -0.279 | 0.783 | 19.000 | 0.626 | 0.476 | 6.112 |
| 2.644  | 0.016 | 19.000 | 0.711 | 0.476 | 6.112 |
| 2.080  | 0.051 | 19.000 | 0.604 | 0.476 | 6.112 |
| 1.185  | 0.251 | 19.000 | 0.581 | 0.476 | 6.112 |
| 0.304  | 0.764 | 19.000 | 0.692 | 0.476 | 6.112 |
| -0.216 | 0.831 | 19.000 | 0.802 | 0.476 | 6.112 |
| 1.481  | 0.155 | 19.000 | 0.771 | 0.476 | 6.112 |
| 0.174  | 0.864 | 19.000 | 0.681 | 0.476 | 6.112 |
| -1.383 | 0.183 | 19.000 | 0.422 | 0.476 | 6.112 |
| 0.613  | 0.547 | 19.000 | 0.982 | 0.476 | 6.112 |
| -0.260 | 0.798 | 19.000 | 0.397 | 0.476 | 6.112 |
| -1.670 | 0.111 | 19.000 | 0.598 | 0.476 | 6.112 |
| -2.288 | 0.034 | 19.000 | 0.425 | 0.476 | 6.112 |
| -1.242 | 0.229 | 19.000 | 0.662 | 0.476 | 6.112 |

|        |       |        |       |       |       |
|--------|-------|--------|-------|-------|-------|
| -0.007 | 0.995 | 19.000 | 0.657 | 0.476 | 6.112 |
| 0.062  | 0.951 | 19.000 | 0.533 | 0.476 | 6.112 |
| -0.610 | 0.549 | 19.000 | 0.593 | 0.476 | 6.112 |
| -0.614 | 0.546 | 19.000 | 0.646 | 0.476 | 6.112 |
| -0.691 | 0.498 | 19.000 | 0.373 | 0.476 | 6.112 |
| -1.309 | 0.206 | 19.000 | 0.577 | 0.476 | 6.112 |
| -0.480 | 0.636 | 19.000 | 0.497 | 0.476 | 6.112 |
| -0.593 | 0.560 | 19.000 | 0.584 | 0.476 | 6.112 |
| 1.898  | 0.073 | 19.000 | 0.501 | 0.476 | 6.112 |
| 2.734  | 0.013 | 19.000 | 0.668 | 0.476 | 6.112 |
| -1.786 | 0.090 | 19.000 | 0.602 | 0.476 | 6.112 |
| -0.034 | 0.973 | 19.000 | 0.738 | 0.476 | 6.112 |
| -0.410 | 0.686 | 19.000 | 0.891 | 0.476 | 6.112 |
| -0.583 | 0.567 | 19.000 | 0.765 | 0.476 | 6.112 |
| 0.666  | 0.514 | 19.000 | 0.417 | 0.476 | 6.112 |
| -0.191 | 0.850 | 19.000 | 0.621 | 0.476 | 6.112 |
| -2.953 | 0.008 | 19.000 | 0.370 | 0.476 | 6.112 |
| -0.527 | 0.605 | 19.000 | 0.559 | 0.476 | 6.112 |
| 0.580  | 0.569 | 19.000 | 0.467 | 0.476 | 6.112 |
| 1.121  | 0.276 | 19.000 | 0.449 | 0.476 | 6.112 |
| 0.079  | 0.938 | 19.000 | 0.735 | 0.476 | 6.112 |
| 1.522  | 0.144 | 19.000 | 0.569 | 0.476 | 6.112 |
| 0.021  | 0.983 | 19.000 | 0.424 | 0.476 | 6.112 |
| 1.397  | 0.179 | 19.000 | 0.397 | 0.476 | 6.112 |
| 0.089  | 0.930 | 19.000 | 0.468 | 0.476 | 6.112 |
| 1.060  | 0.302 | 19.000 | 0.514 | 0.476 | 6.112 |
| -1.177 | 0.254 | 19.000 | 0.880 | 0.476 | 6.112 |
| -0.991 | 0.334 | 19.000 | 0.761 | 0.476 | 6.112 |
| -0.653 | 0.522 | 19.000 | 0.717 | 0.476 | 6.112 |
| -0.011 | 0.991 | 19.000 | 0.532 | 0.476 | 6.112 |
| -2.448 | 0.024 | 19.000 | 0.896 | 0.476 | 6.112 |
| -0.142 | 0.888 | 19.000 | 0.481 | 0.476 | 6.112 |
| 0.028  | 0.978 | 19.000 | 0.648 | 0.476 | 6.112 |
| -1.235 | 0.232 | 19.000 | 0.461 | 0.476 | 6.112 |
| -1.315 | 0.204 | 19.000 | 0.593 | 0.476 | 6.112 |
| -1.284 | 0.214 | 19.000 | 0.425 | 0.476 | 6.112 |
| -0.894 | 0.382 | 19.000 | 0.454 | 0.476 | 6.112 |
| -0.762 | 0.455 | 19.000 | 0.397 | 0.476 | 6.112 |
| -2.660 | 0.015 | 19.000 | 0.655 | 0.476 | 6.112 |
| -2.026 | 0.057 | 19.000 | 0.773 | 0.476 | 6.112 |
| -0.588 | 0.563 | 19.000 | 0.733 | 0.476 | 6.112 |
| 1.690  | 0.107 | 19.000 | 0.387 | 0.476 | 6.112 |
| 0.465  | 0.647 | 19.000 | 0.503 | 0.476 | 6.112 |
| -0.598 | 0.557 | 19.000 | 0.441 | 0.476 | 6.112 |
| 1.968  | 0.064 | 19.000 | 0.625 | 0.476 | 6.112 |
| -2.236 | 0.038 | 19.000 | 0.580 | 0.476 | 6.112 |
| -0.268 | 0.792 | 19.000 | 0.678 | 0.476 | 6.112 |
| 0.509  | 0.616 | 19.000 | 0.587 | 0.476 | 6.112 |
| 2.008  | 0.059 | 19.000 | 0.617 | 0.476 | 6.112 |
| -0.583 | 0.567 | 19.000 | 0.810 | 0.476 | 6.112 |

|        |       |        |       |       |       |
|--------|-------|--------|-------|-------|-------|
| 0.912  | 0.373 | 19.000 | 0.588 | 0.476 | 6.112 |
| -1.107 | 0.282 | 19.000 | 0.771 | 0.476 | 6.112 |
| 0.264  | 0.795 | 19.000 | 0.637 | 0.476 | 6.112 |
| -2.043 | 0.055 | 19.000 | 0.529 | 0.476 | 6.112 |
| -1.483 | 0.154 | 19.000 | 0.374 | 0.476 | 6.112 |
| -0.384 | 0.705 | 19.000 | 0.622 | 0.476 | 6.112 |
| 1.671  | 0.111 | 19.000 | 0.708 | 0.476 | 6.112 |
| -0.803 | 0.432 | 19.000 | 0.636 | 0.476 | 6.112 |
| 1.231  | 0.233 | 19.000 | 0.467 | 0.476 | 6.112 |
| -0.033 | 0.974 | 19.000 | 0.492 | 0.476 | 6.112 |
| -0.458 | 0.652 | 19.000 | 0.474 | 0.476 | 6.112 |
| 1.874  | 0.076 | 19.000 | 0.852 | 0.476 | 6.112 |
| -1.420 | 0.172 | 19.000 | 0.479 | 0.476 | 6.112 |
| 1.528  | 0.143 | 19.000 | 0.437 | 0.476 | 6.112 |
| -0.564 | 0.580 | 19.000 | 0.579 | 0.476 | 6.112 |
| -1.882 | 0.075 | 19.000 | 0.404 | 0.476 | 6.112 |
| 1.772  | 0.092 | 19.000 | 1.085 | 0.476 | 6.112 |
| -0.673 | 0.509 | 19.000 | 0.738 | 0.476 | 6.112 |
| -0.589 | 0.563 | 19.000 | 0.637 | 0.476 | 6.112 |
| -0.536 | 0.598 | 19.000 | 0.471 | 0.476 | 6.112 |
| 1.509  | 0.148 | 19.000 | 0.683 | 0.476 | 6.112 |
| -1.670 | 0.111 | 19.000 | 0.388 | 0.476 | 6.112 |
| -1.111 | 0.281 | 19.000 | 0.419 | 0.476 | 6.112 |
| 0.726  | 0.476 | 19.000 | 0.744 | 0.476 | 6.112 |
| -0.722 | 0.479 | 19.000 | 0.431 | 0.476 | 6.112 |
| -2.086 | 0.051 | 19.000 | 0.407 | 0.476 | 6.112 |
| 2.708  | 0.014 | 19.000 | 0.259 | 0.476 | 6.112 |
| 2.690  | 0.015 | 19.000 | 0.852 | 0.476 | 6.112 |
| -0.981 | 0.339 | 19.000 | 0.623 | 0.476 | 6.112 |
| 1.806  | 0.087 | 19.000 | 0.250 | 0.476 | 6.112 |
| -1.710 | 0.103 | 19.000 | 0.523 | 0.476 | 6.112 |
| 1.398  | 0.178 | 19.000 | 0.470 | 0.476 | 6.112 |
| -1.147 | 0.266 | 19.000 | 0.281 | 0.476 | 6.112 |
| 1.817  | 0.085 | 19.000 | 1.071 | 0.476 | 6.112 |
| 0.001  | 0.999 | 19.000 | 0.531 | 0.476 | 6.112 |
| 2.122  | 0.047 | 19.000 | 0.730 | 0.476 | 6.112 |
| 2.108  | 0.049 | 19.000 | 0.282 | 0.476 | 6.112 |
| 0.564  | 0.579 | 19.000 | 0.457 | 0.476 | 6.112 |
| 1.982  | 0.062 | 19.000 | 0.286 | 0.476 | 6.112 |
| -1.214 | 0.240 | 19.000 | 0.366 | 0.476 | 6.112 |
| 2.112  | 0.048 | 19.000 | 0.478 | 0.476 | 6.112 |
| -0.865 | 0.398 | 19.000 | 0.553 | 0.476 | 6.112 |
| 0.178  | 0.861 | 19.000 | 0.867 | 0.476 | 6.112 |
| 0.911  | 0.374 | 19.000 | 0.316 | 0.476 | 6.112 |
| -1.098 | 0.286 | 19.000 | 0.787 | 0.476 | 6.112 |
| 2.386  | 0.028 | 19.000 | 0.421 | 0.476 | 6.112 |
| 1.543  | 0.139 | 19.000 | 0.449 | 0.476 | 6.112 |
| -1.966 | 0.064 | 19.000 | 0.504 | 0.476 | 6.112 |
| 1.962  | 0.065 | 19.000 | 0.801 | 0.476 | 6.112 |
| -1.838 | 0.082 | 19.000 | 0.505 | 0.476 | 6.112 |

|        |       |        |       |       |       |
|--------|-------|--------|-------|-------|-------|
| -3.716 | 0.001 | 19.000 | 0.409 | 0.476 | 6.112 |
| -0.260 | 0.798 | 19.000 | 0.483 | 0.476 | 6.112 |
| -1.523 | 0.144 | 19.000 | 1.013 | 0.476 | 6.112 |
| -0.370 | 0.715 | 19.000 | 0.672 | 0.476 | 6.112 |
| -1.296 | 0.211 | 19.000 | 0.416 | 0.476 | 6.112 |
| 0.537  | 0.597 | 19.000 | 0.520 | 0.476 | 6.112 |
| -0.269 | 0.791 | 19.000 | 0.582 | 0.476 | 6.112 |
| 1.321  | 0.202 | 19.000 | 0.432 | 0.476 | 6.112 |
| 1.923  | 0.070 | 19.000 | 0.523 | 0.476 | 6.112 |
| -2.822 | 0.011 | 19.000 | 0.299 | 0.476 | 6.112 |
| -3.199 | 0.005 | 19.000 | 0.619 | 0.476 | 6.112 |
| -1.760 | 0.094 | 19.000 | 0.544 | 0.476 | 6.112 |
| -2.422 | 0.026 | 19.000 | 0.924 | 0.476 | 6.112 |
| 1.248  | 0.227 | 19.000 | 0.243 | 0.476 | 6.112 |
| 1.486  | 0.154 | 19.000 | 0.531 | 0.476 | 6.112 |
| -1.893 | 0.074 | 19.000 | 0.944 | 0.476 | 6.112 |
| -1.890 | 0.074 | 19.000 | 0.954 | 0.476 | 6.112 |
| -0.171 | 0.866 | 19.000 | 0.443 | 0.476 | 6.112 |
| 0.652  | 0.522 | 19.000 | 0.470 | 0.476 | 6.112 |
| 0.830  | 0.417 | 19.000 | 0.380 | 0.476 | 6.112 |
| -1.827 | 0.083 | 19.000 | 0.452 | 0.476 | 6.112 |
| 3.141  | 0.005 | 19.000 | 0.377 | 0.476 | 6.112 |
| 3.058  | 0.006 | 19.000 | 0.437 | 0.476 | 6.112 |
| 2.017  | 0.058 | 19.000 | 0.533 | 0.476 | 6.112 |
| 0.578  | 0.570 | 19.000 | 0.499 | 0.476 | 6.112 |
| -2.358 | 0.029 | 19.000 | 0.561 | 0.476 | 6.112 |
| 2.265  | 0.035 | 19.000 | 1.009 | 0.476 | 6.112 |
| 1.983  | 0.062 | 19.000 | 0.375 | 0.476 | 6.112 |
| -1.042 | 0.310 | 19.000 | 0.636 | 0.476 | 6.112 |
| 0.207  | 0.838 | 19.000 | 0.279 | 0.476 | 6.112 |
| -0.128 | 0.899 | 19.000 | 0.432 | 0.476 | 6.112 |
| 1.731  | 0.100 | 19.000 | 0.376 | 0.476 | 6.112 |
| 2.370  | 0.029 | 19.000 | 0.634 | 0.476 | 6.112 |
| 2.382  | 0.028 | 19.000 | 1.076 | 0.476 | 6.112 |
| -0.358 | 0.725 | 19.000 | 0.513 | 0.476 | 6.112 |
| -0.565 | 0.579 | 19.000 | 0.418 | 0.476 | 6.112 |
| -0.356 | 0.726 | 19.000 | 1.265 | 0.476 | 6.112 |
| 1.242  | 0.229 | 19.000 | 0.610 | 0.476 | 6.112 |
| 0.756  | 0.459 | 19.000 | 0.343 | 0.476 | 6.112 |
| 1.800  | 0.088 | 19.000 | 0.867 | 0.476 | 6.112 |
| 1.435  | 0.168 | 19.000 | 0.770 | 0.476 | 6.112 |
| 1.384  | 0.182 | 19.000 | 0.784 | 0.476 | 6.112 |
| -2.334 | 0.031 | 19.000 | 0.484 | 0.476 | 6.112 |
| 1.194  | 0.247 | 19.000 | 0.434 | 0.476 | 6.112 |
| 1.670  | 0.111 | 19.000 | 0.290 | 0.476 | 6.112 |
| -0.439 | 0.666 | 19.000 | 0.400 | 0.476 | 6.112 |
| -0.144 | 0.887 | 19.000 | 0.421 | 0.476 | 6.112 |
| 0.041  | 0.968 | 19.000 | 0.480 | 0.476 | 6.112 |
| -1.251 | 0.226 | 19.000 | 0.457 | 0.476 | 6.112 |
| 0.993  | 0.333 | 19.000 | 0.374 | 0.476 | 6.112 |

|        |       |        |       |       |       |
|--------|-------|--------|-------|-------|-------|
| 1.987  | 0.062 | 19.000 | 0.328 | 0.476 | 6.112 |
| 1.871  | 0.077 | 19.000 | 0.236 | 0.476 | 6.112 |
| 0.004  | 0.996 | 19.000 | 0.417 | 0.476 | 6.112 |
| 1.569  | 0.133 | 19.000 | 0.366 | 0.476 | 6.112 |
| 2.112  | 0.048 | 19.000 | 0.339 | 0.476 | 6.112 |
| 2.988  | 0.008 | 19.000 | 0.250 | 0.476 | 6.112 |
| 0.385  | 0.704 | 19.000 | 0.284 | 0.476 | 6.112 |
| 0.996  | 0.332 | 19.000 | 0.392 | 0.476 | 6.112 |
| -0.340 | 0.738 | 19.000 | 0.343 | 0.476 | 6.112 |
| 0.028  | 0.978 | 19.000 | 0.283 | 0.476 | 6.112 |
| 2.194  | 0.041 | 19.000 | 0.269 | 0.476 | 6.112 |
| 3.207  | 0.005 | 19.000 | 0.304 | 0.476 | 6.112 |
| -2.045 | 0.055 | 19.000 | 0.431 | 0.476 | 6.112 |
| 1.470  | 0.158 | 19.000 | 0.360 | 0.476 | 6.112 |
| -0.170 | 0.867 | 19.000 | 0.516 | 0.476 | 6.112 |
| 2.129  | 0.047 | 19.000 | 0.311 | 0.476 | 6.112 |
| 1.563  | 0.135 | 19.000 | 0.373 | 0.476 | 6.112 |
| 0.266  | 0.793 | 19.000 | 0.380 | 0.476 | 6.112 |
| -0.709 | 0.487 | 19.000 | 0.765 | 0.476 | 6.112 |
| 0.659  | 0.518 | 19.000 | 0.689 | 0.476 | 6.112 |
| -0.078 | 0.939 | 19.000 | 0.645 | 0.476 | 6.112 |
| 0.101  | 0.921 | 19.000 | 0.792 | 0.476 | 6.112 |
| 1.094  | 0.288 | 19.000 | 0.234 | 0.476 | 6.112 |
| 1.893  | 0.074 | 19.000 | 0.326 | 0.476 | 6.112 |
| -1.285 | 0.214 | 19.000 | 0.383 | 0.476 | 6.112 |
| -0.930 | 0.364 | 19.000 | 0.439 | 0.476 | 6.112 |
| -1.697 | 0.106 | 19.000 | 0.384 | 0.476 | 6.112 |
| -0.236 | 0.816 | 19.000 | 0.562 | 0.476 | 6.112 |
| 0.625  | 0.540 | 19.000 | 0.536 | 0.476 | 6.112 |
| -1.281 | 0.216 | 19.000 | 0.487 | 0.476 | 6.112 |
| 0.465  | 0.647 | 19.000 | 0.434 | 0.476 | 6.112 |
| 1.386  | 0.182 | 19.000 | 0.593 | 0.476 | 6.112 |
| 1.877  | 0.076 | 19.000 | 0.384 | 0.476 | 6.112 |
| 0.947  | 0.356 | 19.000 | 0.682 | 0.476 | 6.112 |
| -0.554 | 0.586 | 19.000 | 0.422 | 0.476 | 6.112 |
| 1.361  | 0.189 | 19.000 | 1.238 | 0.476 | 6.112 |
| -0.243 | 0.810 | 19.000 | 0.436 | 0.476 | 6.112 |
| -0.451 | 0.657 | 19.000 | 1.146 | 0.476 | 6.112 |
| -0.565 | 0.578 | 19.000 | 0.973 | 0.476 | 6.112 |
| -0.001 | 0.999 | 19.000 | 0.880 | 0.476 | 6.112 |
| 0.074  | 0.942 | 19.000 | 0.833 | 0.476 | 6.112 |
| 1.690  | 0.107 | 19.000 | 0.675 | 0.476 | 6.112 |
| 1.206  | 0.243 | 19.000 | 0.601 | 0.476 | 6.112 |
| 0.302  | 0.766 | 19.000 | 0.511 | 0.476 | 6.112 |
| 0.223  | 0.826 | 19.000 | 0.428 | 0.476 | 6.112 |
| 2.382  | 0.028 | 19.000 | 0.361 | 0.476 | 6.112 |
| 1.186  | 0.250 | 19.000 | 0.291 | 0.476 | 6.112 |
| -0.092 | 0.928 | 19.000 | 0.435 | 0.476 | 6.112 |
| 1.511  | 0.147 | 19.000 | 0.343 | 0.476 | 6.112 |
| 0.320  | 0.752 | 19.000 | 0.717 | 0.476 | 6.112 |



|        |       |        |       |       |       |
|--------|-------|--------|-------|-------|-------|
| -0.802 | 0.433 | 19.000 | 0.462 | 0.476 | 6.112 |
| -1.387 | 0.181 | 19.000 | 0.561 | 0.476 | 6.112 |
| -0.914 | 0.372 | 19.000 | 0.436 | 0.476 | 6.112 |
| -2.007 | 0.059 | 19.000 | 0.598 | 0.476 | 6.112 |
| -0.836 | 0.413 | 19.000 | 0.496 | 0.476 | 6.112 |
| 2.010  | 0.059 | 19.000 | 0.253 | 0.476 | 6.112 |
| 1.125  | 0.274 | 19.000 | 0.218 | 0.476 | 6.112 |
| -0.356 | 0.725 | 19.000 | 0.296 | 0.476 | 6.112 |
| 0.110  | 0.914 | 19.000 | 0.428 | 0.476 | 6.112 |
| 2.163  | 0.044 | 19.000 | 0.298 | 0.476 | 6.112 |
| -2.061 | 0.053 | 19.000 | 0.498 | 0.476 | 6.112 |
| -0.777 | 0.447 | 19.000 | 0.297 | 0.476 | 6.112 |
| 2.930  | 0.009 | 19.000 | 0.247 | 0.476 | 6.112 |
| 2.911  | 0.009 | 19.000 | 0.356 | 0.476 | 6.112 |
| -0.706 | 0.489 | 19.000 | 0.597 | 0.476 | 6.112 |
| -0.634 | 0.533 | 19.000 | 0.415 | 0.476 | 6.112 |
| -2.291 | 0.034 | 19.000 | 0.400 | 0.476 | 6.112 |
| -1.309 | 0.206 | 19.000 | 0.303 | 0.476 | 6.112 |
| 0.010  | 0.992 | 19.000 | 0.445 | 0.476 | 6.112 |
| -0.960 | 0.349 | 19.000 | 1.160 | 0.476 | 6.112 |
| 1.017  | 0.322 | 19.000 | 0.978 | 0.476 | 6.112 |
| -0.031 | 0.975 | 19.000 | 0.588 | 0.476 | 6.112 |
| 0.033  | 0.974 | 19.000 | 1.186 | 0.476 | 6.112 |
| -0.135 | 0.894 | 19.000 | 0.771 | 0.476 | 6.112 |
| -0.486 | 0.632 | 19.000 | 0.599 | 0.476 | 6.112 |
| 0.391  | 0.700 | 19.000 | 0.685 | 0.476 | 6.112 |
| -0.035 | 0.972 | 19.000 | 0.649 | 0.476 | 6.112 |
| 0.358  | 0.724 | 19.000 | 0.704 | 0.476 | 6.112 |
| 0.280  | 0.782 | 19.000 | 0.955 | 0.476 | 6.112 |
| -0.113 | 0.912 | 19.000 | 0.592 | 0.476 | 6.112 |
| 0.312  | 0.758 | 19.000 | 0.505 | 0.476 | 6.112 |
| 1.418  | 0.172 | 19.000 | 0.747 | 0.476 | 6.112 |
| -0.201 | 0.843 | 19.000 | 0.578 | 0.476 | 6.112 |
| -2.950 | 0.008 | 19.000 | 0.488 | 0.476 | 6.112 |
| 1.803  | 0.087 | 19.000 | 0.805 | 0.476 | 6.112 |
| 1.885  | 0.075 | 19.000 | 0.394 | 0.476 | 6.112 |
| 1.100  | 0.285 | 19.000 | 0.368 | 0.476 | 6.112 |
| 0.262  | 0.796 | 19.000 | 0.598 | 0.476 | 6.112 |
| 1.693  | 0.107 | 19.000 | 1.025 | 0.476 | 6.112 |
| -1.953 | 0.066 | 19.000 | 0.445 | 0.476 | 6.112 |
| -2.915 | 0.009 | 19.000 | 0.568 | 0.476 | 6.112 |
| -0.409 | 0.687 | 19.000 | 0.459 | 0.476 | 6.112 |
| -1.561 | 0.135 | 19.000 | 0.539 | 0.476 | 6.112 |
| -0.546 | 0.592 | 19.000 | 0.701 | 0.476 | 6.112 |
| -0.296 | 0.771 | 19.000 | 0.539 | 0.476 | 6.112 |
| 0.121  | 0.905 | 19.000 | 0.542 | 0.476 | 6.112 |
| 1.860  | 0.079 | 19.000 | 0.507 | 0.476 | 6.112 |
| -0.462 | 0.649 | 19.000 | 0.472 | 0.476 | 6.112 |
| 1.844  | 0.081 | 19.000 | 0.399 | 0.476 | 6.112 |
| 1.183  | 0.252 | 19.000 | 0.506 | 0.476 | 6.112 |

|        |       |        |       |       |       |
|--------|-------|--------|-------|-------|-------|
| 0.717  | 0.482 | 19.000 | 0.509 | 0.476 | 6.112 |
| 2.571  | 0.019 | 19.000 | 0.376 | 0.476 | 6.112 |
| -1.966 | 0.064 | 19.000 | 0.459 | 0.476 | 6.112 |
| 1.200  | 0.245 | 19.000 | 0.405 | 0.476 | 6.112 |
| 1.993  | 0.061 | 19.000 | 0.605 | 0.476 | 6.112 |
| 1.023  | 0.319 | 19.000 | 0.754 | 0.476 | 6.112 |
| -2.536 | 0.020 | 19.000 | 0.383 | 0.476 | 6.112 |
| 0.087  | 0.931 | 19.000 | 0.418 | 0.476 | 6.112 |
| -0.453 | 0.655 | 19.000 | 0.615 | 0.476 | 6.112 |
| 0.117  | 0.908 | 19.000 | 0.453 | 0.476 | 6.112 |
| 0.661  | 0.516 | 19.000 | 0.736 | 0.476 | 6.112 |
| -0.860 | 0.401 | 19.000 | 0.317 | 0.476 | 6.112 |
| -1.930 | 0.069 | 19.000 | 0.531 | 0.476 | 6.112 |
| 0.513  | 0.614 | 19.000 | 0.584 | 0.476 | 6.112 |
| -0.141 | 0.889 | 19.000 | 0.619 | 0.476 | 6.112 |
| -2.141 | 0.045 | 19.000 | 0.480 | 0.476 | 6.112 |
| 2.252  | 0.036 | 19.000 | 0.485 | 0.476 | 6.112 |
| -0.628 | 0.537 | 19.000 | 1.102 | 0.476 | 6.112 |
| 1.399  | 0.178 | 19.000 | 0.646 | 0.476 | 6.112 |
| 0.343  | 0.735 | 19.000 | 0.340 | 0.476 | 6.112 |
| -2.322 | 0.031 | 19.000 | 0.776 | 0.476 | 6.112 |
| -2.516 | 0.021 | 19.000 | 0.567 | 0.476 | 6.112 |
| -1.624 | 0.121 | 19.000 | 0.601 | 0.476 | 6.112 |
| -0.142 | 0.888 | 19.000 | 0.959 | 0.476 | 6.112 |
| 2.801  | 0.011 | 19.000 | 0.431 | 0.476 | 6.112 |
| 1.637  | 0.118 | 19.000 | 0.523 | 0.476 | 6.112 |
| -0.994 | 0.333 | 19.000 | 0.598 | 0.476 | 6.112 |
| 2.719  | 0.014 | 19.000 | 0.221 | 0.476 | 6.112 |
| -2.865 | 0.010 | 19.000 | 0.515 | 0.476 | 6.112 |
| -0.770 | 0.451 | 19.000 | 0.616 | 0.476 | 6.112 |
| -3.037 | 0.007 | 19.000 | 0.514 | 0.476 | 6.112 |
| 2.162  | 0.044 | 19.000 | 0.605 | 0.476 | 6.112 |
| -1.821 | 0.084 | 19.000 | 0.426 | 0.476 | 6.112 |
| 1.848  | 0.080 | 19.000 | 0.478 | 0.476 | 6.112 |
| -3.081 | 0.006 | 19.000 | 0.650 | 0.476 | 6.112 |
| 2.931  | 0.009 | 19.000 | 0.473 | 0.476 | 6.112 |
| 1.860  | 0.078 | 19.000 | 0.255 | 0.476 | 6.112 |
| 2.347  | 0.030 | 19.000 | 1.074 | 0.476 | 6.112 |
| 2.635  | 0.016 | 19.000 | 0.431 | 0.476 | 6.112 |
| 2.273  | 0.035 | 19.000 | 0.404 | 0.476 | 6.112 |
| -1.398 | 0.178 | 19.000 | 0.560 | 0.476 | 6.112 |
| 0.794  | 0.437 | 19.000 | 0.762 | 0.476 | 6.112 |
| 1.995  | 0.061 | 19.000 | 0.300 | 0.476 | 6.112 |
| 1.172  | 0.256 | 19.000 | 0.488 | 0.476 | 6.112 |
| -0.701 | 0.492 | 19.000 | 0.408 | 0.476 | 6.112 |
| -1.276 | 0.217 | 19.000 | 0.373 | 0.476 | 6.112 |
| -2.289 | 0.034 | 19.000 | 0.506 | 0.476 | 6.112 |
| -0.426 | 0.675 | 19.000 | 0.583 | 0.476 | 6.112 |
| -1.574 | 0.132 | 19.000 | 0.351 | 0.476 | 6.112 |
| 2.507  | 0.021 | 19.000 | 0.282 | 0.476 | 6.112 |

|        |       |        |       |       |       |
|--------|-------|--------|-------|-------|-------|
| 0.908  | 0.376 | 19.000 | 0.601 | 0.476 | 6.112 |
| -0.154 | 0.879 | 19.000 | 0.394 | 0.476 | 6.112 |
| -1.536 | 0.141 | 19.000 | 0.377 | 0.476 | 6.112 |
| 3.129  | 0.006 | 19.000 | 0.457 | 0.476 | 6.112 |
| -1.093 | 0.288 | 19.000 | 0.646 | 0.476 | 6.112 |
| 1.470  | 0.158 | 19.000 | 0.771 | 0.476 | 6.112 |
| 2.379  | 0.028 | 19.000 | 0.735 | 0.476 | 6.112 |
| 1.639  | 0.118 | 19.000 | 0.517 | 0.476 | 6.112 |
| 2.017  | 0.058 | 19.000 | 0.651 | 0.476 | 6.112 |
| -1.332 | 0.199 | 19.000 | 0.396 | 0.476 | 6.112 |
| 1.919  | 0.070 | 19.000 | 0.978 | 0.476 | 6.112 |
| 1.403  | 0.177 | 19.000 | 0.300 | 0.476 | 6.112 |
| 2.690  | 0.015 | 19.000 | 0.304 | 0.476 | 6.112 |
| -0.540 | 0.595 | 19.000 | 1.082 | 0.476 | 6.112 |
| -2.139 | 0.046 | 19.000 | 0.409 | 0.476 | 6.112 |
| 1.794  | 0.089 | 19.000 | 0.425 | 0.476 | 6.112 |
| 1.469  | 0.158 | 19.000 | 0.462 | 0.476 | 6.112 |
| -2.023 | 0.057 | 19.000 | 0.434 | 0.476 | 6.112 |
| 1.134  | 0.271 | 19.000 | 0.519 | 0.476 | 6.112 |
| -0.377 | 0.711 | 19.000 | 0.440 | 0.476 | 6.112 |
| -1.147 | 0.266 | 19.000 | 0.402 | 0.476 | 6.112 |
| -2.359 | 0.029 | 19.000 | 0.506 | 0.476 | 6.112 |
| 2.171  | 0.043 | 19.000 | 0.624 | 0.476 | 6.112 |
| -1.978 | 0.063 | 19.000 | 0.479 | 0.476 | 6.112 |
| -2.351 | 0.030 | 19.000 | 0.281 | 0.476 | 6.112 |
| -2.449 | 0.024 | 19.000 | 0.270 | 0.476 | 6.112 |
| -1.027 | 0.317 | 19.000 | 0.429 | 0.476 | 6.112 |
| -1.360 | 0.190 | 19.000 | 0.309 | 0.476 | 6.112 |
| -2.121 | 0.047 | 19.000 | 0.803 | 0.476 | 6.112 |
| -1.332 | 0.199 | 19.000 | 0.564 | 0.476 | 6.112 |
| -1.317 | 0.204 | 19.000 | 0.570 | 0.476 | 6.112 |
| -2.351 | 0.030 | 19.000 | 0.318 | 0.476 | 6.112 |
| -1.037 | 0.313 | 19.000 | 0.615 | 0.476 | 6.112 |
| -0.789 | 0.440 | 19.000 | 0.479 | 0.476 | 6.112 |
| 2.148  | 0.045 | 19.000 | 0.399 | 0.476 | 6.112 |
| -0.532 | 0.601 | 19.000 | 0.241 | 0.476 | 6.112 |
| 1.426  | 0.170 | 19.000 | 0.621 | 0.476 | 6.112 |
| -1.496 | 0.151 | 19.000 | 0.407 | 0.476 | 6.112 |
| 2.533  | 0.020 | 19.000 | 0.228 | 0.476 | 6.112 |
| 1.789  | 0.090 | 19.000 | 0.511 | 0.476 | 6.112 |
| 2.303  | 0.033 | 19.000 | 0.834 | 0.476 | 6.112 |
| -2.702 | 0.014 | 19.000 | 0.676 | 0.476 | 6.112 |
| -0.344 | 0.735 | 19.000 | 0.706 | 0.476 | 6.112 |
| -0.525 | 0.606 | 19.000 | 0.589 | 0.476 | 6.112 |
| -0.951 | 0.353 | 19.000 | 0.513 | 0.476 | 6.112 |
| 2.040  | 0.055 | 19.000 | 0.333 | 0.476 | 6.112 |
| 3.008  | 0.007 | 19.000 | 0.313 | 0.476 | 6.112 |
| -0.988 | 0.336 | 19.000 | 0.775 | 0.476 | 6.112 |
| -2.104 | 0.049 | 19.000 | 0.621 | 0.476 | 6.112 |
| -1.504 | 0.149 | 19.000 | 0.830 | 0.476 | 6.112 |

|        |       |        |       |       |       |
|--------|-------|--------|-------|-------|-------|
| 2.473  | 0.023 | 19.000 | 0.335 | 0.476 | 6.112 |
| -0.600 | 0.556 | 19.000 | 1.050 | 0.476 | 6.112 |
| -2.336 | 0.031 | 19.000 | 0.427 | 0.476 | 6.112 |
| 0.264  | 0.795 | 19.000 | 0.347 | 0.476 | 6.112 |
| 2.314  | 0.032 | 19.000 | 0.861 | 0.476 | 6.112 |
| 0.409  | 0.687 | 19.000 | 0.671 | 0.476 | 6.112 |
| -0.080 | 0.937 | 19.000 | 1.429 | 0.476 | 6.112 |
| 2.078  | 0.052 | 19.000 | 0.845 | 0.476 | 6.112 |
| -0.539 | 0.596 | 19.000 | 0.429 | 0.476 | 6.112 |
| -2.907 | 0.009 | 19.000 | 0.676 | 0.476 | 6.112 |
| 2.529  | 0.020 | 19.000 | 0.321 | 0.476 | 6.112 |
| 2.053  | 0.054 | 19.000 | 0.268 | 0.476 | 6.112 |
| 2.758  | 0.013 | 19.000 | 0.444 | 0.476 | 6.112 |
| -0.448 | 0.659 | 19.000 | 0.328 | 0.476 | 6.112 |
| -2.294 | 0.033 | 19.000 | 0.622 | 0.476 | 6.112 |
| 0.238  | 0.814 | 19.000 | 0.445 | 0.476 | 6.112 |
| -2.707 | 0.014 | 19.000 | 0.482 | 0.476 | 6.112 |
| -2.391 | 0.027 | 19.000 | 0.401 | 0.476 | 6.112 |
| 1.858  | 0.079 | 19.000 | 0.389 | 0.476 | 6.112 |
| 1.891  | 0.074 | 19.000 | 0.632 | 0.476 | 6.112 |
| -2.045 | 0.055 | 19.000 | 0.279 | 0.476 | 6.112 |
| 2.209  | 0.040 | 19.000 | 0.898 | 0.476 | 6.112 |
| -2.077 | 0.052 | 19.000 | 0.590 | 0.476 | 6.112 |
| 3.379  | 0.003 | 19.000 | 0.256 | 0.476 | 6.112 |
| 1.323  | 0.201 | 19.000 | 0.767 | 0.476 | 6.112 |
| 1.446  | 0.164 | 19.000 | 0.228 | 0.476 | 6.112 |
| 2.840  | 0.010 | 19.000 | 0.370 | 0.476 | 6.112 |
| 2.658  | 0.016 | 19.000 | 0.384 | 0.476 | 6.112 |
| 2.170  | 0.043 | 19.000 | 0.230 | 0.476 | 6.112 |
| 2.366  | 0.029 | 19.000 | 0.395 | 0.476 | 6.112 |
| -1.291 | 0.212 | 19.000 | 0.758 | 0.476 | 6.112 |
| -0.901 | 0.379 | 19.000 | 0.686 | 0.476 | 6.112 |
| 0.550  | 0.589 | 19.000 | 0.441 | 0.476 | 6.112 |
| 1.800  | 0.088 | 19.000 | 0.542 | 0.476 | 6.112 |
| 1.556  | 0.136 | 19.000 | 0.772 | 0.476 | 6.112 |
| 0.218  | 0.830 | 19.000 | 0.409 | 0.476 | 6.112 |
| 1.787  | 0.090 | 19.000 | 0.512 | 0.476 | 6.112 |
| -3.607 | 0.002 | 19.000 | 0.283 | 0.476 | 6.112 |
| -0.285 | 0.779 | 19.000 | 0.318 | 0.476 | 6.112 |
| 1.998  | 0.060 | 19.000 | 0.706 | 0.476 | 6.112 |
| 0.725  | 0.477 | 19.000 | 1.592 | 0.476 | 6.112 |
| 1.108  | 0.282 | 19.000 | 1.592 | 0.476 | 6.112 |
| 0.978  | 0.340 | 19.000 | 1.258 | 0.476 | 6.112 |
| 2.752  | 0.013 | 19.000 | 0.541 | 0.476 | 6.112 |
| 1.555  | 0.137 | 19.000 | 0.465 | 0.476 | 6.112 |
| 1.917  | 0.070 | 19.000 | 0.645 | 0.476 | 6.112 |
| -1.673 | 0.111 | 19.000 | 0.702 | 0.476 | 6.112 |
| -1.241 | 0.230 | 19.000 | 0.618 | 0.476 | 6.112 |
| -1.667 | 0.112 | 19.000 | 0.354 | 0.476 | 6.112 |
| 1.956  | 0.065 | 19.000 | 0.834 | 0.476 | 6.112 |

|        |       |        |       |       |       |
|--------|-------|--------|-------|-------|-------|
| 2.445  | 0.024 | 19.000 | 0.928 | 0.476 | 6.112 |
| -1.610 | 0.124 | 19.000 | 0.321 | 0.476 | 6.112 |
| -2.223 | 0.039 | 19.000 | 0.391 | 0.476 | 6.112 |
| -0.976 | 0.341 | 19.000 | 0.337 | 0.476 | 6.112 |
| 2.567  | 0.019 | 19.000 | 1.049 | 0.476 | 6.112 |
| 1.304  | 0.208 | 19.000 | 0.740 | 0.476 | 6.112 |
| 2.487  | 0.022 | 19.000 | 0.651 | 0.476 | 6.112 |
| 0.941  | 0.358 | 19.000 | 0.424 | 0.476 | 6.112 |
| 0.959  | 0.350 | 19.000 | 0.322 | 0.476 | 6.112 |
| 1.988  | 0.061 | 19.000 | 0.487 | 0.476 | 6.112 |
| 2.417  | 0.026 | 19.000 | 1.055 | 0.476 | 6.112 |
| 3.065  | 0.006 | 19.000 | 1.368 | 0.476 | 6.112 |
| 1.459  | 0.161 | 19.000 | 0.304 | 0.476 | 6.112 |
| -1.159 | 0.261 | 19.000 | 0.348 | 0.476 | 6.112 |
| -1.979 | 0.063 | 19.000 | 0.367 | 0.476 | 6.112 |
| -1.082 | 0.293 | 19.000 | 0.421 | 0.476 | 6.112 |
| -0.989 | 0.335 | 19.000 | 0.330 | 0.476 | 6.112 |
| -1.934 | 0.068 | 19.000 | 0.332 | 0.476 | 6.112 |
| -1.950 | 0.066 | 19.000 | 0.518 | 0.476 | 6.112 |
| -1.101 | 0.285 | 19.000 | 0.606 | 0.476 | 6.112 |
| 0.863  | 0.399 | 19.000 | 0.852 | 0.476 | 6.112 |
| -2.029 | 0.057 | 19.000 | 0.363 | 0.476 | 6.112 |
| -0.436 | 0.668 | 19.000 | 0.437 | 0.476 | 6.112 |
| -0.368 | 0.717 | 19.000 | 0.360 | 0.476 | 6.112 |
| -0.146 | 0.885 | 19.000 | 0.363 | 0.476 | 6.112 |
| -0.413 | 0.685 | 19.000 | 0.468 | 0.476 | 6.112 |
| 1.968  | 0.064 | 19.000 | 0.739 | 0.476 | 6.112 |
| -2.285 | 0.034 | 19.000 | 0.585 | 0.476 | 6.112 |
| 2.095  | 0.050 | 19.000 | 0.335 | 0.476 | 6.112 |
| 1.164  | 0.259 | 19.000 | 0.414 | 0.476 | 6.112 |
| 0.438  | 0.666 | 19.000 | 0.317 | 0.476 | 6.112 |
| -0.160 | 0.875 | 19.000 | 0.458 | 0.476 | 6.112 |
| 2.095  | 0.050 | 19.000 | 0.469 | 0.476 | 6.112 |
| -2.659 | 0.015 | 19.000 | 0.355 | 0.476 | 6.112 |
| 1.099  | 0.285 | 19.000 | 0.501 | 0.476 | 6.112 |
| 1.463  | 0.160 | 19.000 | 0.352 | 0.476 | 6.112 |
| 1.523  | 0.144 | 19.000 | 0.458 | 0.476 | 6.112 |
| -0.975 | 0.342 | 19.000 | 0.361 | 0.476 | 6.112 |
| 1.727  | 0.100 | 19.000 | 0.469 | 0.476 | 6.112 |
| -0.943 | 0.358 | 19.000 | 0.404 | 0.476 | 6.112 |
| -2.874 | 0.010 | 19.000 | 0.514 | 0.476 | 6.112 |
| -1.165 | 0.258 | 19.000 | 0.413 | 0.476 | 6.112 |
| 1.198  | 0.246 | 19.000 | 0.333 | 0.476 | 6.112 |
| 2.467  | 0.023 | 19.000 | 0.780 | 0.476 | 6.112 |
| -2.470 | 0.023 | 19.000 | 0.409 | 0.476 | 6.112 |
| -2.415 | 0.026 | 19.000 | 0.982 | 0.476 | 6.112 |
| 1.509  | 0.148 | 19.000 | 0.357 | 0.476 | 6.112 |
| 2.414  | 0.026 | 19.000 | 0.783 | 0.476 | 6.112 |
| -3.761 | 0.001 | 19.000 | 0.338 | 0.476 | 6.112 |
| -2.062 | 0.053 | 19.000 | 0.456 | 0.476 | 6.112 |

|        |       |        |       |       |       |
|--------|-------|--------|-------|-------|-------|
| 0.675  | 0.508 | 19.000 | 0.406 | 0.476 | 6.112 |
| -0.286 | 0.778 | 19.000 | 0.394 | 0.476 | 6.112 |
| -2.656 | 0.016 | 19.000 | 0.497 | 0.476 | 6.112 |
| -0.922 | 0.368 | 19.000 | 0.424 | 0.476 | 6.112 |
| 1.716  | 0.102 | 19.000 | 0.232 | 0.476 | 6.112 |
| 1.747  | 0.097 | 19.000 | 0.371 | 0.476 | 6.112 |
| -2.442 | 0.025 | 19.000 | 0.667 | 0.476 | 6.112 |
| 0.489  | 0.631 | 19.000 | 0.455 | 0.476 | 6.112 |
| 0.024  | 0.981 | 19.000 | 0.298 | 0.476 | 6.112 |
| -2.470 | 0.023 | 19.000 | 0.787 | 0.476 | 6.112 |
| 1.228  | 0.234 | 19.000 | 0.309 | 0.476 | 6.112 |
| 1.612  | 0.123 | 19.000 | 0.423 | 0.476 | 6.112 |
| -0.041 | 0.968 | 19.000 | 0.449 | 0.476 | 6.112 |
| 2.100  | 0.049 | 19.000 | 0.473 | 0.476 | 6.112 |
| -1.481 | 0.155 | 19.000 | 0.321 | 0.476 | 6.112 |
| -3.224 | 0.004 | 19.000 | 0.470 | 0.476 | 6.112 |
| 1.699  | 0.106 | 19.000 | 0.406 | 0.476 | 6.112 |
| 0.145  | 0.886 | 19.000 | 0.533 | 0.476 | 6.112 |
| -3.063 | 0.006 | 19.000 | 0.536 | 0.476 | 6.112 |
| 1.727  | 0.100 | 19.000 | 0.621 | 0.476 | 6.112 |
| 0.631  | 0.536 | 19.000 | 0.556 | 0.476 | 6.112 |
| 0.964  | 0.347 | 19.000 | 0.425 | 0.476 | 6.112 |
| 2.016  | 0.058 | 19.000 | 1.064 | 0.476 | 6.112 |
| 2.081  | 0.051 | 19.000 | 0.364 | 0.476 | 6.112 |
| 1.039  | 0.312 | 19.000 | 0.300 | 0.476 | 6.112 |
| -0.927 | 0.366 | 19.000 | 0.502 | 0.476 | 6.112 |
| 2.147  | 0.045 | 19.000 | 0.931 | 0.476 | 6.112 |
| 0.714  | 0.484 | 19.000 | 0.664 | 0.476 | 6.112 |
| 2.566  | 0.019 | 19.000 | 0.328 | 0.476 | 6.112 |
| 0.141  | 0.889 | 19.000 | 0.342 | 0.476 | 6.112 |
| -0.585 | 0.566 | 19.000 | 0.429 | 0.476 | 6.112 |
| -0.403 | 0.692 | 19.000 | 0.411 | 0.476 | 6.112 |
| 0.079  | 0.938 | 19.000 | 0.391 | 0.476 | 6.112 |
| 2.284  | 0.034 | 19.000 | 0.681 | 0.476 | 6.112 |
| 1.672  | 0.111 | 19.000 | 0.387 | 0.476 | 6.112 |
| 1.626  | 0.120 | 19.000 | 0.287 | 0.476 | 6.112 |
| 2.024  | 0.057 | 19.000 | 0.269 | 0.476 | 6.112 |
| 1.906  | 0.072 | 19.000 | 0.282 | 0.476 | 6.112 |
| -1.965 | 0.064 | 19.000 | 0.455 | 0.476 | 6.112 |
| 2.042  | 0.055 | 19.000 | 0.395 | 0.476 | 6.112 |
| 3.187  | 0.005 | 19.000 | 0.559 | 0.476 | 6.112 |
| 1.471  | 0.158 | 19.000 | 0.482 | 0.476 | 6.112 |
| -0.117 | 0.908 | 19.000 | 0.442 | 0.476 | 6.112 |
| -3.114 | 0.006 | 19.000 | 0.392 | 0.476 | 6.112 |
| -1.450 | 0.163 | 19.000 | 0.545 | 0.476 | 6.112 |
| 0.562  | 0.581 | 19.000 | 0.351 | 0.476 | 6.112 |
| 0.789  | 0.440 | 19.000 | 0.477 | 0.476 | 6.112 |
| 1.555  | 0.136 | 19.000 | 1.388 | 0.476 | 6.112 |
| 1.764  | 0.094 | 19.000 | 0.360 | 0.476 | 6.112 |
| 1.602  | 0.126 | 19.000 | 0.516 | 0.476 | 6.112 |

|        |       |        |       |       |       |
|--------|-------|--------|-------|-------|-------|
| 0.752  | 0.461 | 19.000 | 0.423 | 0.476 | 6.112 |
| -2.510 | 0.021 | 19.000 | 0.529 | 0.476 | 6.112 |
| 0.497  | 0.625 | 19.000 | 0.390 | 0.476 | 6.112 |
| -1.820 | 0.085 | 19.000 | 0.403 | 0.476 | 6.112 |
| -0.041 | 0.968 | 19.000 | 0.465 | 0.476 | 6.112 |
| -2.238 | 0.037 | 19.000 | 0.570 | 0.476 | 6.112 |
| -1.873 | 0.077 | 19.000 | 0.555 | 0.476 | 6.112 |
| -4.271 | 0.000 | 19.000 | 0.310 | 0.476 | 6.112 |
| 0.244  | 0.810 | 19.000 | 0.504 | 0.476 | 6.112 |
| -1.900 | 0.073 | 19.000 | 0.366 | 0.476 | 6.112 |
| -1.223 | 0.236 | 19.000 | 0.528 | 0.476 | 6.112 |
| -0.906 | 0.376 | 19.000 | 0.398 | 0.476 | 6.112 |
| -1.838 | 0.082 | 19.000 | 0.392 | 0.476 | 6.112 |
| -2.013 | 0.059 | 19.000 | 0.363 | 0.476 | 6.112 |
| -1.678 | 0.110 | 19.000 | 0.359 | 0.476 | 6.112 |
| -1.605 | 0.125 | 19.000 | 0.597 | 0.476 | 6.112 |
| -2.318 | 0.032 | 19.000 | 0.341 | 0.476 | 6.112 |
| -2.552 | 0.019 | 19.000 | 0.504 | 0.476 | 6.112 |
| 2.420  | 0.026 | 19.000 | 0.634 | 0.476 | 6.112 |
| 1.364  | 0.189 | 19.000 | 0.376 | 0.476 | 6.112 |
| -0.220 | 0.828 | 19.000 | 0.509 | 0.476 | 6.112 |
| -0.867 | 0.397 | 19.000 | 0.625 | 0.476 | 6.112 |
| -0.010 | 0.992 | 19.000 | 0.883 | 0.476 | 6.112 |
| -0.733 | 0.473 | 19.000 | 0.489 | 0.476 | 6.112 |
| 2.284  | 0.034 | 19.000 | 0.557 | 0.476 | 6.112 |
| 1.727  | 0.100 | 19.000 | 1.033 | 0.476 | 6.112 |
| -0.657 | 0.519 | 19.000 | 1.168 | 0.476 | 6.112 |
| 1.913  | 0.071 | 19.000 | 0.736 | 0.476 | 6.112 |
| 0.183  | 0.857 | 19.000 | 0.252 | 0.476 | 6.112 |
| 1.615  | 0.123 | 19.000 | 0.664 | 0.476 | 6.112 |
| 2.155  | 0.044 | 19.000 | 0.931 | 0.476 | 6.112 |
| 0.983  | 0.338 | 19.000 | 0.574 | 0.476 | 6.112 |
| 2.539  | 0.020 | 19.000 | 0.482 | 0.476 | 6.112 |
| 0.346  | 0.733 | 19.000 | 0.480 | 0.476 | 6.112 |
| 1.189  | 0.249 | 19.000 | 0.662 | 0.476 | 6.112 |
| 1.991  | 0.061 | 19.000 | 0.482 | 0.476 | 6.112 |
| 1.668  | 0.112 | 19.000 | 0.300 | 0.476 | 6.112 |
| 2.244  | 0.037 | 19.000 | 1.135 | 0.476 | 6.112 |
| 3.122  | 0.006 | 19.000 | 0.323 | 0.476 | 6.112 |
| -0.588 | 0.564 | 19.000 | 0.437 | 0.476 | 6.112 |
| 0.503  | 0.621 | 19.000 | 0.375 | 0.476 | 6.112 |
| 1.899  | 0.073 | 19.000 | 0.343 | 0.476 | 6.112 |
| 0.066  | 0.948 | 19.000 | 0.501 | 0.476 | 6.112 |
| 1.175  | 0.255 | 19.000 | 0.698 | 0.476 | 6.112 |
| -0.147 | 0.885 | 19.000 | 0.788 | 0.476 | 6.112 |
| 0.501  | 0.622 | 19.000 | 0.437 | 0.476 | 6.112 |
| -3.068 | 0.006 | 19.000 | 0.420 | 0.476 | 6.112 |
| 3.035  | 0.007 | 19.000 | 0.313 | 0.476 | 6.112 |
| 1.988  | 0.061 | 19.000 | 0.402 | 0.476 | 6.112 |
| 0.540  | 0.595 | 19.000 | 0.821 | 0.476 | 6.112 |

|        |       |        |       |       |       |
|--------|-------|--------|-------|-------|-------|
| 0.595  | 0.559 | 19.000 | 0.530 | 0.476 | 6.112 |
| 0.942  | 0.358 | 19.000 | 0.577 | 0.476 | 6.112 |
| 0.334  | 0.742 | 19.000 | 0.458 | 0.476 | 6.112 |
| 1.343  | 0.195 | 19.000 | 0.322 | 0.476 | 6.112 |
| 0.035  | 0.972 | 19.000 | 0.535 | 0.476 | 6.112 |
| 2.713  | 0.014 | 19.000 | 1.424 | 0.476 | 6.112 |
| -0.162 | 0.873 | 19.000 | 0.437 | 0.476 | 6.112 |
| 1.442  | 0.165 | 19.000 | 0.991 | 0.476 | 6.112 |
| 2.177  | 0.042 | 19.000 | 0.960 | 0.476 | 6.112 |
| 2.290  | 0.034 | 19.000 | 0.564 | 0.476 | 6.112 |
| -1.093 | 0.288 | 19.000 | 0.350 | 0.476 | 6.112 |
| 1.921  | 0.070 | 19.000 | 0.789 | 0.476 | 6.112 |
| 2.273  | 0.035 | 19.000 | 0.607 | 0.476 | 6.112 |
| 2.291  | 0.034 | 19.000 | 0.664 | 0.476 | 6.112 |
| 1.975  | 0.063 | 19.000 | 0.569 | 0.476 | 6.112 |
| -1.093 | 0.288 | 19.000 | 0.697 | 0.476 | 6.112 |
| 1.527  | 0.143 | 19.000 | 0.810 | 0.476 | 6.112 |
| 1.662  | 0.113 | 19.000 | 0.780 | 0.476 | 6.112 |
| 1.139  | 0.269 | 19.000 | 0.556 | 0.476 | 6.112 |
| 2.281  | 0.034 | 19.000 | 0.523 | 0.476 | 6.112 |
| -1.475 | 0.157 | 19.000 | 0.558 | 0.476 | 6.112 |
| -2.599 | 0.018 | 19.000 | 0.342 | 0.476 | 6.112 |
| 0.979  | 0.340 | 19.000 | 0.666 | 0.476 | 6.112 |
| 1.914  | 0.071 | 19.000 | 0.405 | 0.476 | 6.112 |
| -1.177 | 0.254 | 19.000 | 0.452 | 0.476 | 6.112 |
| 2.327  | 0.031 | 19.000 | 0.579 | 0.476 | 6.112 |
| -0.442 | 0.664 | 19.000 | 0.473 | 0.476 | 6.112 |
| -1.772 | 0.092 | 19.000 | 0.480 | 0.476 | 6.112 |
| -1.699 | 0.106 | 19.000 | 0.480 | 0.476 | 6.112 |
| 1.504  | 0.149 | 19.000 | 0.467 | 0.476 | 6.112 |
| 2.636  | 0.016 | 19.000 | 0.505 | 0.476 | 6.112 |
| 2.338  | 0.030 | 19.000 | 0.525 | 0.476 | 6.112 |
| 0.837  | 0.413 | 19.000 | 0.433 | 0.476 | 6.112 |
| -0.813 | 0.426 | 19.000 | 0.506 | 0.476 | 6.112 |
| 2.225  | 0.038 | 19.000 | 0.489 | 0.476 | 6.112 |
| 0.737  | 0.470 | 19.000 | 0.588 | 0.476 | 6.112 |
| -2.017 | 0.058 | 19.000 | 0.357 | 0.476 | 6.112 |
| 1.795  | 0.089 | 19.000 | 0.483 | 0.476 | 6.112 |
| 2.091  | 0.050 | 19.000 | 1.008 | 0.476 | 6.112 |
| -1.630 | 0.120 | 19.000 | 0.419 | 0.476 | 6.112 |
| -1.120 | 0.277 | 19.000 | 0.328 | 0.476 | 6.112 |
| -0.658 | 0.519 | 19.000 | 0.403 | 0.476 | 6.112 |
| 2.127  | 0.047 | 19.000 | 0.220 | 0.476 | 6.112 |
| 1.701  | 0.105 | 19.000 | 0.338 | 0.476 | 6.112 |
| 1.907  | 0.072 | 19.000 | 0.535 | 0.476 | 6.112 |
| 3.681  | 0.002 | 19.000 | 0.418 | 0.476 | 6.112 |
| 2.497  | 0.022 | 19.000 | 0.492 | 0.476 | 6.112 |
| 1.608  | 0.124 | 19.000 | 0.353 | 0.476 | 6.112 |
| 2.385  | 0.028 | 19.000 | 0.441 | 0.476 | 6.112 |
| 0.752  | 0.461 | 19.000 | 0.373 | 0.476 | 6.112 |



|        |       |        |       |       |       |
|--------|-------|--------|-------|-------|-------|
| -1.502 | 0.150 | 19.000 | 0.630 | 0.476 | 6.112 |
| 0.919  | 0.370 | 19.000 | 0.644 | 0.476 | 6.112 |
| -0.769 | 0.451 | 19.000 | 0.462 | 0.476 | 6.112 |
| -0.088 | 0.931 | 19.000 | 0.458 | 0.476 | 6.112 |
| -1.306 | 0.207 | 19.000 | 0.552 | 0.476 | 6.112 |
| 2.406  | 0.026 | 19.000 | 0.915 | 0.476 | 6.112 |
| -0.021 | 0.983 | 19.000 | 0.452 | 0.476 | 6.112 |
| -1.697 | 0.106 | 19.000 | 0.408 | 0.476 | 6.112 |
| 1.943  | 0.067 | 19.000 | 0.488 | 0.476 | 6.112 |
| 1.298  | 0.210 | 19.000 | 0.613 | 0.476 | 6.112 |
| 1.095  | 0.287 | 19.000 | 0.563 | 0.476 | 6.112 |
| 0.648  | 0.525 | 19.000 | 0.343 | 0.476 | 6.112 |
| 1.584  | 0.130 | 19.000 | 0.563 | 0.476 | 6.112 |
| 2.223  | 0.039 | 19.000 | 0.911 | 0.476 | 6.112 |
| -0.508 | 0.617 | 19.000 | 0.455 | 0.476 | 6.112 |
| 2.369  | 0.029 | 19.000 | 0.407 | 0.476 | 6.112 |
| 2.247  | 0.037 | 19.000 | 0.427 | 0.476 | 6.112 |
| -2.674 | 0.015 | 19.000 | 0.439 | 0.476 | 6.112 |
| -1.349 | 0.193 | 19.000 | 0.448 | 0.476 | 6.112 |
| -0.392 | 0.700 | 19.000 | 0.465 | 0.476 | 6.112 |
| 0.611  | 0.548 | 19.000 | 0.429 | 0.476 | 6.112 |
| 1.223  | 0.236 | 19.000 | 0.401 | 0.476 | 6.112 |
| -0.313 | 0.758 | 19.000 | 0.464 | 0.476 | 6.112 |
| -0.793 | 0.438 | 19.000 | 0.479 | 0.476 | 6.112 |
| 1.677  | 0.110 | 19.000 | 0.669 | 0.476 | 6.112 |
| 1.664  | 0.113 | 19.000 | 0.534 | 0.476 | 6.112 |
| 0.078  | 0.938 | 19.000 | 0.476 | 0.476 | 6.112 |
| -1.378 | 0.184 | 19.000 | 0.412 | 0.476 | 6.112 |
| -1.435 | 0.168 | 19.000 | 0.413 | 0.476 | 6.112 |
| 2.629  | 0.017 | 19.000 | 0.348 | 0.476 | 6.112 |
| 1.598  | 0.127 | 19.000 | 0.387 | 0.476 | 6.112 |
| -1.395 | 0.179 | 19.000 | 0.535 | 0.476 | 6.112 |
| 0.935  | 0.362 | 19.000 | 0.931 | 0.476 | 6.112 |
| -0.893 | 0.383 | 19.000 | 0.331 | 0.476 | 6.112 |
| 2.533  | 0.020 | 19.000 | 1.021 | 0.476 | 6.112 |
| 3.355  | 0.003 | 19.000 | 0.279 | 0.476 | 6.112 |
| 2.031  | 0.056 | 19.000 | 0.250 | 0.476 | 6.112 |
| 2.392  | 0.027 | 19.000 | 0.596 | 0.476 | 6.112 |
| 1.546  | 0.139 | 19.000 | 0.593 | 0.476 | 6.112 |
| 2.140  | 0.046 | 19.000 | 1.003 | 0.476 | 6.112 |
| 0.030  | 0.977 | 19.000 | 0.563 | 0.476 | 6.112 |
| 0.462  | 0.649 | 19.000 | 0.530 | 0.476 | 6.112 |
| 0.173  | 0.864 | 19.000 | 0.633 | 0.476 | 6.112 |
| 1.513  | 0.147 | 19.000 | 0.447 | 0.476 | 6.112 |
| -0.725 | 0.477 | 19.000 | 0.524 | 0.476 | 6.112 |
| -2.654 | 0.016 | 19.000 | 0.610 | 0.476 | 6.112 |
| -3.713 | 0.001 | 19.000 | 0.544 | 0.476 | 6.112 |
| -2.154 | 0.044 | 19.000 | 0.816 | 0.476 | 6.112 |
| 1.473  | 0.157 | 19.000 | 0.928 | 0.476 | 6.112 |
| 0.425  | 0.676 | 19.000 | 0.492 | 0.476 | 6.112 |

|        |       |        |       |       |       |
|--------|-------|--------|-------|-------|-------|
| 2.214  | 0.039 | 19.000 | 0.221 | 0.476 | 6.112 |
| -0.681 | 0.504 | 19.000 | 0.799 | 0.476 | 6.112 |
| 2.564  | 0.019 | 19.000 | 0.867 | 0.476 | 6.112 |
| 1.240  | 0.230 | 19.000 | 0.615 | 0.476 | 6.112 |
| 1.791  | 0.089 | 19.000 | 0.783 | 0.476 | 6.112 |
| -1.476 | 0.156 | 19.000 | 0.476 | 0.476 | 6.112 |
| 2.811  | 0.011 | 19.000 | 0.694 | 0.476 | 6.112 |
| 1.106  | 0.283 | 19.000 | 0.426 | 0.476 | 6.112 |
| 1.845  | 0.081 | 19.000 | 0.647 | 0.476 | 6.112 |
| 2.327  | 0.031 | 19.000 | 0.616 | 0.476 | 6.112 |
| 0.620  | 0.542 | 19.000 | 0.465 | 0.476 | 6.112 |
| 3.180  | 0.005 | 19.000 | 0.518 | 0.476 | 6.112 |
| 2.266  | 0.035 | 19.000 | 1.306 | 0.476 | 6.112 |
| -0.558 | 0.584 | 19.000 | 0.456 | 0.476 | 6.112 |
| -0.601 | 0.555 | 19.000 | 0.431 | 0.476 | 6.112 |
| -0.521 | 0.608 | 19.000 | 0.495 | 0.476 | 6.112 |
| -1.113 | 0.279 | 19.000 | 0.525 | 0.476 | 6.112 |
| -0.592 | 0.561 | 19.000 | 0.742 | 0.476 | 6.112 |
| -0.899 | 0.380 | 19.000 | 0.767 | 0.476 | 6.112 |
| 0.143  | 0.888 | 19.000 | 0.530 | 0.476 | 6.112 |
| -0.669 | 0.512 | 19.000 | 0.794 | 0.476 | 6.112 |
| -1.173 | 0.255 | 19.000 | 0.666 | 0.476 | 6.112 |
| 0.446  | 0.661 | 19.000 | 0.622 | 0.476 | 6.112 |
| -0.832 | 0.416 | 19.000 | 0.462 | 0.476 | 6.112 |
| -1.913 | 0.071 | 19.000 | 0.640 | 0.476 | 6.112 |
| -1.477 | 0.156 | 19.000 | 1.105 | 0.476 | 6.112 |
| -1.735 | 0.099 | 19.000 | 0.798 | 0.476 | 6.112 |
| 1.123  | 0.276 | 19.000 | 0.586 | 0.476 | 6.112 |
| 1.329  | 0.199 | 19.000 | 0.424 | 0.476 | 6.112 |
| -1.905 | 0.072 | 19.000 | 1.011 | 0.476 | 6.112 |
| -0.294 | 0.772 | 19.000 | 0.461 | 0.476 | 6.112 |
| -1.684 | 0.109 | 19.000 | 0.379 | 0.476 | 6.112 |
| 2.532  | 0.020 | 19.000 | 0.322 | 0.476 | 6.112 |
| 2.629  | 0.017 | 19.000 | 0.204 | 0.476 | 6.112 |
| 1.616  | 0.123 | 19.000 | 0.491 | 0.476 | 6.112 |
| -2.712 | 0.014 | 19.000 | 0.374 | 0.476 | 6.112 |
| 1.881  | 0.075 | 19.000 | 0.431 | 0.476 | 6.112 |
| -0.494 | 0.627 | 19.000 | 0.479 | 0.476 | 6.112 |
| 2.383  | 0.028 | 19.000 | 0.508 | 0.476 | 6.112 |
| 2.261  | 0.036 | 19.000 | 0.442 | 0.476 | 6.112 |
| -0.231 | 0.820 | 19.000 | 0.521 | 0.476 | 6.112 |
| 2.656  | 0.016 | 19.000 | 0.362 | 0.476 | 6.112 |
| -1.776 | 0.092 | 19.000 | 0.408 | 0.476 | 6.112 |
| -1.079 | 0.294 | 19.000 | 0.396 | 0.476 | 6.112 |
| 0.028  | 0.978 | 19.000 | 0.468 | 0.476 | 6.112 |
| -0.067 | 0.947 | 19.000 | 0.416 | 0.476 | 6.112 |
| 1.448  | 0.164 | 19.000 | 0.788 | 0.476 | 6.112 |
| 1.042  | 0.310 | 19.000 | 0.370 | 0.476 | 6.112 |
| 1.277  | 0.217 | 19.000 | 0.505 | 0.476 | 6.112 |
| 3.314  | 0.004 | 19.000 | 0.625 | 0.476 | 6.112 |

|        |       |        |       |       |       |
|--------|-------|--------|-------|-------|-------|
| 0.549  | 0.590 | 19.000 | 0.521 | 0.476 | 6.112 |
| 2.051  | 0.054 | 19.000 | 0.422 | 0.476 | 6.112 |
| 2.927  | 0.009 | 19.000 | 0.371 | 0.476 | 6.112 |
| -1.415 | 0.173 | 19.000 | 0.267 | 0.476 | 6.112 |
| -2.784 | 0.012 | 19.000 | 0.468 | 0.476 | 6.112 |
| 2.362  | 0.029 | 19.000 | 0.420 | 0.476 | 6.112 |
| -1.891 | 0.074 | 19.000 | 0.390 | 0.476 | 6.112 |
| 2.181  | 0.042 | 19.000 | 0.361 | 0.476 | 6.112 |
| -1.210 | 0.241 | 19.000 | 0.534 | 0.476 | 6.112 |
| 0.531  | 0.601 | 19.000 | 0.550 | 0.476 | 6.112 |
| 3.206  | 0.005 | 19.000 | 0.584 | 0.476 | 6.112 |
| 1.869  | 0.077 | 19.000 | 0.596 | 0.476 | 6.112 |
| 0.530  | 0.602 | 19.000 | 0.676 | 0.476 | 6.112 |
| 0.287  | 0.777 | 19.000 | 0.599 | 0.476 | 6.112 |
| -1.520 | 0.145 | 19.000 | 0.405 | 0.476 | 6.112 |
| -0.682 | 0.504 | 19.000 | 0.346 | 0.476 | 6.112 |
| -0.407 | 0.689 | 19.000 | 0.413 | 0.476 | 6.112 |
| 1.405  | 0.176 | 19.000 | 0.439 | 0.476 | 6.112 |
| 1.505  | 0.149 | 19.000 | 0.837 | 0.476 | 6.112 |
| -2.342 | 0.030 | 19.000 | 0.603 | 0.476 | 6.112 |
| -1.612 | 0.123 | 19.000 | 0.535 | 0.476 | 6.112 |
| -0.940 | 0.359 | 19.000 | 0.871 | 0.476 | 6.112 |
| -1.111 | 0.281 | 19.000 | 0.859 | 0.476 | 6.112 |
| -0.504 | 0.620 | 19.000 | 0.389 | 0.476 | 6.112 |
| -2.145 | 0.045 | 19.000 | 0.704 | 0.476 | 6.112 |
| -0.284 | 0.780 | 19.000 | 0.491 | 0.476 | 6.112 |
| 3.046  | 0.007 | 19.000 | 0.577 | 0.476 | 6.112 |
| 1.966  | 0.064 | 19.000 | 0.882 | 0.476 | 6.112 |
| -1.987 | 0.062 | 19.000 | 0.477 | 0.476 | 6.112 |
| 1.032  | 0.315 | 19.000 | 0.405 | 0.476 | 6.112 |
| -2.238 | 0.037 | 19.000 | 0.528 | 0.476 | 6.112 |
| -3.000 | 0.007 | 19.000 | 0.387 | 0.476 | 6.112 |
| 1.865  | 0.078 | 19.000 | 1.118 | 0.476 | 6.112 |
| -1.239 | 0.230 | 19.000 | 0.533 | 0.476 | 6.112 |
| -1.675 | 0.110 | 19.000 | 0.745 | 0.476 | 6.112 |
| 1.525  | 0.144 | 19.000 | 0.222 | 0.476 | 6.112 |
| 1.096  | 0.287 | 19.000 | 0.438 | 0.476 | 6.112 |
| -1.055 | 0.305 | 19.000 | 0.286 | 0.476 | 6.112 |
| 1.882  | 0.075 | 19.000 | 0.382 | 0.476 | 6.112 |
| 0.264  | 0.794 | 19.000 | 0.429 | 0.476 | 6.112 |
| -2.453 | 0.024 | 19.000 | 0.656 | 0.476 | 6.112 |
| 2.991  | 0.008 | 19.000 | 0.655 | 0.476 | 6.112 |
| -1.488 | 0.153 | 19.000 | 0.388 | 0.476 | 6.112 |
| 1.958  | 0.065 | 19.000 | 0.871 | 0.476 | 6.112 |
| 2.364  | 0.029 | 19.000 | 1.063 | 0.476 | 6.112 |
| -2.474 | 0.023 | 19.000 | 0.368 | 0.476 | 6.112 |
| 1.391  | 0.180 | 19.000 | 0.315 | 0.476 | 6.112 |
| -0.598 | 0.557 | 19.000 | 0.418 | 0.476 | 6.112 |
| 1.662  | 0.113 | 19.000 | 0.421 | 0.476 | 6.112 |
| -0.374 | 0.713 | 19.000 | 0.483 | 0.476 | 6.112 |

|        |       |        |       |       |       |
|--------|-------|--------|-------|-------|-------|
| 2.519  | 0.021 | 19.000 | 0.349 | 0.476 | 6.112 |
| 1.934  | 0.068 | 19.000 | 0.512 | 0.476 | 6.112 |
| 1.439  | 0.166 | 19.000 | 0.851 | 0.476 | 6.112 |
| 1.260  | 0.223 | 19.000 | 0.234 | 0.476 | 6.112 |
| -0.114 | 0.910 | 19.000 | 0.447 | 0.476 | 6.112 |
| -1.094 | 0.288 | 19.000 | 0.644 | 0.476 | 6.112 |
| 0.867  | 0.397 | 19.000 | 0.452 | 0.476 | 6.112 |
| -2.266 | 0.035 | 19.000 | 0.559 | 0.476 | 6.112 |
| 0.495  | 0.626 | 19.000 | 0.513 | 0.476 | 6.112 |
| -3.219 | 0.005 | 19.000 | 0.658 | 0.476 | 6.112 |
| -2.286 | 0.034 | 19.000 | 0.525 | 0.476 | 6.112 |
| -2.706 | 0.014 | 19.000 | 0.301 | 0.476 | 6.112 |
| -3.161 | 0.005 | 19.000 | 0.349 | 0.476 | 6.112 |
| 1.592  | 0.128 | 19.000 | 0.516 | 0.476 | 6.112 |
| -2.209 | 0.040 | 19.000 | 0.398 | 0.476 | 6.112 |
| -1.377 | 0.185 | 19.000 | 0.518 | 0.476 | 6.112 |
| 1.108  | 0.282 | 19.000 | 0.337 | 0.476 | 6.112 |
| 2.131  | 0.046 | 19.000 | 0.441 | 0.476 | 6.112 |
| 1.878  | 0.076 | 19.000 | 1.149 | 0.476 | 6.112 |
| -0.975 | 0.342 | 19.000 | 0.416 | 0.476 | 6.112 |
| 0.801  | 0.433 | 19.000 | 0.471 | 0.476 | 6.112 |
| 2.185  | 0.042 | 19.000 | 0.354 | 0.476 | 6.112 |
| -2.388 | 0.028 | 19.000 | 0.550 | 0.476 | 6.112 |
| -0.673 | 0.509 | 19.000 | 0.356 | 0.476 | 6.112 |
| 0.475  | 0.640 | 19.000 | 0.440 | 0.476 | 6.112 |
| 3.102  | 0.006 | 19.000 | 0.924 | 0.476 | 6.112 |
| -1.398 | 0.178 | 19.000 | 0.474 | 0.476 | 6.112 |
| -1.368 | 0.187 | 19.000 | 0.504 | 0.476 | 6.112 |
| -1.181 | 0.252 | 19.000 | 0.520 | 0.476 | 6.112 |
| -0.668 | 0.512 | 19.000 | 0.600 | 0.476 | 6.112 |
| -0.751 | 0.462 | 19.000 | 0.539 | 0.476 | 6.112 |
| -1.048 | 0.308 | 19.000 | 0.553 | 0.476 | 6.112 |
| 0.350  | 0.730 | 19.000 | 0.389 | 0.476 | 6.112 |
| -1.489 | 0.153 | 19.000 | 0.531 | 0.476 | 6.112 |
| -2.472 | 0.023 | 19.000 | 0.613 | 0.476 | 6.112 |
| -0.833 | 0.415 | 19.000 | 0.376 | 0.476 | 6.112 |
| -2.058 | 0.054 | 19.000 | 0.416 | 0.476 | 6.112 |
| -0.986 | 0.336 | 19.000 | 0.446 | 0.476 | 6.112 |
| -2.193 | 0.041 | 19.000 | 0.485 | 0.476 | 6.112 |
| 1.360  | 0.190 | 19.000 | 0.301 | 0.476 | 6.112 |
| 1.659  | 0.114 | 19.000 | 0.442 | 0.476 | 6.112 |
| 0.705  | 0.490 | 19.000 | 1.118 | 0.476 | 6.112 |
| -0.981 | 0.339 | 19.000 | 0.509 | 0.476 | 6.112 |
| 0.231  | 0.820 | 19.000 | 0.367 | 0.476 | 6.112 |
| 1.620  | 0.122 | 19.000 | 0.787 | 0.476 | 6.112 |
| 1.626  | 0.120 | 19.000 | 0.441 | 0.476 | 6.112 |
| 2.177  | 0.042 | 19.000 | 0.630 | 0.476 | 6.112 |
| 1.830  | 0.083 | 19.000 | 1.189 | 0.476 | 6.112 |
| -0.938 | 0.360 | 19.000 | 0.393 | 0.476 | 6.112 |
| 1.101  | 0.285 | 19.000 | 0.430 | 0.476 | 6.112 |

|        |       |        |       |       |       |
|--------|-------|--------|-------|-------|-------|
| 1.839  | 0.082 | 19.000 | 0.509 | 0.476 | 6.112 |
| 2.526  | 0.021 | 19.000 | 0.448 | 0.476 | 6.112 |
| 1.151  | 0.264 | 19.000 | 0.456 | 0.476 | 6.112 |
| 0.637  | 0.532 | 19.000 | 0.434 | 0.476 | 6.112 |
| -0.307 | 0.762 | 19.000 | 0.533 | 0.476 | 6.112 |
| 2.219  | 0.039 | 19.000 | 0.408 | 0.476 | 6.112 |
| 2.174  | 0.043 | 19.000 | 0.432 | 0.476 | 6.112 |
| 0.291  | 0.774 | 19.000 | 0.504 | 0.476 | 6.112 |
| 0.445  | 0.661 | 19.000 | 0.705 | 0.476 | 6.112 |
| 0.476  | 0.640 | 19.000 | 0.696 | 0.476 | 6.112 |
| 0.162  | 0.873 | 19.000 | 0.551 | 0.476 | 6.112 |
| 1.118  | 0.277 | 19.000 | 0.396 | 0.476 | 6.112 |
| 1.349  | 0.193 | 19.000 | 0.456 | 0.476 | 6.112 |
| -1.541 | 0.140 | 19.000 | 0.461 | 0.476 | 6.112 |
| 2.271  | 0.035 | 19.000 | 0.436 | 0.476 | 6.112 |
| -0.924 | 0.367 | 19.000 | 0.560 | 0.476 | 6.112 |
| -0.575 | 0.572 | 19.000 | 0.412 | 0.476 | 6.112 |
| 2.476  | 0.023 | 19.000 | 0.961 | 0.476 | 6.112 |
| 1.936  | 0.068 | 19.000 | 0.271 | 0.476 | 6.112 |
| 2.609  | 0.017 | 19.000 | 0.347 | 0.476 | 6.112 |
| 1.212  | 0.240 | 19.000 | 0.416 | 0.476 | 6.112 |
| 0.532  | 0.601 | 19.000 | 0.372 | 0.476 | 6.112 |
| -0.025 | 0.980 | 19.000 | 0.449 | 0.476 | 6.112 |
| 1.650  | 0.115 | 19.000 | 0.826 | 0.476 | 6.112 |
| 0.895  | 0.382 | 19.000 | 1.070 | 0.476 | 6.112 |
| 2.349  | 0.030 | 19.000 | 1.097 | 0.476 | 6.112 |
| 1.016  | 0.322 | 19.000 | 0.448 | 0.476 | 6.112 |
| 1.390  | 0.181 | 19.000 | 1.154 | 0.476 | 6.112 |
| -2.514 | 0.021 | 19.000 | 0.782 | 0.476 | 6.112 |
| 2.970  | 0.008 | 19.000 | 0.419 | 0.476 | 6.112 |
| 1.381  | 0.183 | 19.000 | 0.265 | 0.476 | 6.112 |
| 1.924  | 0.069 | 19.000 | 0.348 | 0.476 | 6.112 |
| 0.676  | 0.507 | 19.000 | 0.262 | 0.476 | 6.112 |
| -1.475 | 0.157 | 19.000 | 0.661 | 0.476 | 6.112 |
| 2.024  | 0.057 | 19.000 | 0.431 | 0.476 | 6.112 |
| -1.421 | 0.171 | 19.000 | 0.737 | 0.476 | 6.112 |
| -1.642 | 0.117 | 19.000 | 0.302 | 0.476 | 6.112 |
| 1.460  | 0.161 | 19.000 | 0.579 | 0.476 | 6.112 |
| 1.291  | 0.212 | 19.000 | 0.408 | 0.476 | 6.112 |
| 1.829  | 0.083 | 19.000 | 0.838 | 0.476 | 6.112 |
| 2.323  | 0.031 | 19.000 | 0.743 | 0.476 | 6.112 |
| -1.723 | 0.101 | 19.000 | 0.549 | 0.476 | 6.112 |
| 2.269  | 0.035 | 19.000 | 0.837 | 0.476 | 6.112 |
| -1.276 | 0.217 | 19.000 | 0.317 | 0.476 | 6.112 |
| 1.157  | 0.261 | 19.000 | 0.447 | 0.476 | 6.112 |
| 2.234  | 0.038 | 19.000 | 0.445 | 0.476 | 6.112 |
| -2.082 | 0.051 | 19.000 | 0.333 | 0.476 | 6.112 |
| 2.085  | 0.051 | 19.000 | 0.372 | 0.476 | 6.112 |
| 1.214  | 0.240 | 19.000 | 0.578 | 0.476 | 6.112 |
| -1.197 | 0.246 | 19.000 | 0.636 | 0.476 | 6.112 |

|        |       |        |       |       |       |
|--------|-------|--------|-------|-------|-------|
| -0.275 | 0.786 | 19.000 | 0.356 | 0.476 | 6.112 |
| 0.036  | 0.972 | 19.000 | 0.407 | 0.476 | 6.112 |
| -2.281 | 0.034 | 19.000 | 0.557 | 0.476 | 6.112 |
| 1.627  | 0.120 | 19.000 | 0.359 | 0.476 | 6.112 |
| -3.401 | 0.003 | 19.000 | 0.357 | 0.476 | 6.112 |
| -1.739 | 0.098 | 19.000 | 0.416 | 0.476 | 6.112 |
| 0.105  | 0.918 | 19.000 | 0.952 | 0.476 | 6.112 |
| -1.944 | 0.067 | 19.000 | 0.498 | 0.476 | 6.112 |
| 0.529  | 0.603 | 19.000 | 0.539 | 0.476 | 6.112 |
| -1.452 | 0.163 | 19.000 | 0.935 | 0.476 | 6.112 |
| -1.128 | 0.274 | 19.000 | 0.564 | 0.476 | 6.112 |
| -2.635 | 0.016 | 19.000 | 0.470 | 0.476 | 6.112 |
| 1.792  | 0.089 | 19.000 | 0.332 | 0.476 | 6.112 |
| 0.485  | 0.633 | 19.000 | 0.527 | 0.476 | 6.112 |
| 1.980  | 0.062 | 19.000 | 0.570 | 0.476 | 6.112 |
| -2.502 | 0.022 | 19.000 | 0.619 | 0.476 | 6.112 |
| 0.476  | 0.640 | 19.000 | 0.682 | 0.476 | 6.112 |
| -2.794 | 0.012 | 19.000 | 0.351 | 0.476 | 6.112 |
| -0.088 | 0.931 | 19.000 | 0.519 | 0.476 | 6.112 |
| -1.223 | 0.236 | 19.000 | 0.330 | 0.476 | 6.112 |
| 2.881  | 0.010 | 19.000 | 0.651 | 0.476 | 6.112 |
| 0.613  | 0.547 | 19.000 | 0.346 | 0.476 | 6.112 |
| 1.582  | 0.130 | 19.000 | 0.286 | 0.476 | 6.112 |
| -0.209 | 0.837 | 19.000 | 0.521 | 0.476 | 6.112 |
| -2.970 | 0.008 | 19.000 | 0.398 | 0.476 | 6.112 |
| 2.733  | 0.013 | 19.000 | 0.397 | 0.476 | 6.112 |
| -0.785 | 0.442 | 19.000 | 0.448 | 0.476 | 6.112 |
| 1.951  | 0.066 | 19.000 | 0.539 | 0.476 | 6.112 |
| 0.523  | 0.607 | 19.000 | 0.595 | 0.476 | 6.112 |
| -0.199 | 0.844 | 19.000 | 0.375 | 0.476 | 6.112 |
| 2.436  | 0.025 | 19.000 | 0.652 | 0.476 | 6.112 |
| -0.413 | 0.684 | 19.000 | 0.464 | 0.476 | 6.112 |
| 2.318  | 0.032 | 19.000 | 0.577 | 0.476 | 6.112 |
| -0.876 | 0.392 | 19.000 | 0.430 | 0.476 | 6.112 |
| 0.231  | 0.820 | 19.000 | 0.543 | 0.476 | 6.112 |
| 0.996  | 0.332 | 19.000 | 0.549 | 0.476 | 6.112 |
| 0.949  | 0.354 | 19.000 | 0.502 | 0.476 | 6.112 |
| -0.893 | 0.383 | 19.000 | 0.346 | 0.476 | 6.112 |
| 2.385  | 0.028 | 19.000 | 0.306 | 0.476 | 6.112 |
| -1.582 | 0.130 | 19.000 | 0.767 | 0.476 | 6.112 |
| -0.371 | 0.715 | 19.000 | 0.494 | 0.476 | 6.112 |
| 0.944  | 0.357 | 19.000 | 0.449 | 0.476 | 6.112 |
| -0.400 | 0.693 | 19.000 | 0.435 | 0.476 | 6.112 |
| 0.680  | 0.505 | 19.000 | 0.353 | 0.476 | 6.112 |
| 1.434  | 0.168 | 19.000 | 0.267 | 0.476 | 6.112 |
| -1.966 | 0.064 | 19.000 | 0.378 | 0.476 | 6.112 |
| -2.073 | 0.052 | 19.000 | 0.343 | 0.476 | 6.112 |
| -0.247 | 0.808 | 19.000 | 0.305 | 0.476 | 6.112 |
| -0.073 | 0.943 | 19.000 | 0.447 | 0.476 | 6.112 |
| 1.510  | 0.148 | 19.000 | 0.328 | 0.476 | 6.112 |

|        |       |        |       |       |       |
|--------|-------|--------|-------|-------|-------|
| 1.172  | 0.256 | 19.000 | 0.467 | 0.476 | 6.112 |
| 0.028  | 0.978 | 19.000 | 0.430 | 0.476 | 6.112 |
| 2.282  | 0.034 | 19.000 | 0.373 | 0.476 | 6.112 |
| 1.104  | 0.283 | 19.000 | 0.434 | 0.476 | 6.112 |
| -1.792 | 0.089 | 19.000 | 0.307 | 0.476 | 6.112 |
| 2.888  | 0.009 | 19.000 | 0.273 | 0.476 | 6.112 |
| -2.228 | 0.038 | 19.000 | 0.721 | 0.476 | 6.112 |
| -0.003 | 0.998 | 19.000 | 0.410 | 0.476 | 6.112 |
| 1.041  | 0.311 | 19.000 | 0.367 | 0.476 | 6.112 |
| -0.291 | 0.774 | 19.000 | 0.352 | 0.476 | 6.112 |
| -0.043 | 0.966 | 19.000 | 0.464 | 0.476 | 6.112 |
| -2.872 | 0.010 | 19.000 | 0.353 | 0.476 | 6.112 |
| 0.991  | 0.334 | 19.000 | 0.208 | 0.476 | 6.112 |
| 1.811  | 0.086 | 19.000 | 0.553 | 0.476 | 6.112 |
| -1.613 | 0.123 | 19.000 | 0.397 | 0.476 | 6.112 |
| -0.024 | 0.981 | 19.000 | 0.470 | 0.476 | 6.112 |
| 2.690  | 0.014 | 19.000 | 0.950 | 0.476 | 6.112 |
| -1.047 | 0.308 | 19.000 | 0.422 | 0.476 | 6.112 |
| 2.038  | 0.056 | 19.000 | 0.392 | 0.476 | 6.112 |
| -1.888 | 0.074 | 19.000 | 0.249 | 0.476 | 6.112 |
| 2.498  | 0.022 | 19.000 | 0.871 | 0.476 | 6.112 |
| -2.973 | 0.008 | 19.000 | 0.326 | 0.476 | 6.112 |
| -2.792 | 0.012 | 19.000 | 0.303 | 0.476 | 6.112 |
| -1.269 | 0.220 | 19.000 | 0.347 | 0.476 | 6.112 |
| -0.096 | 0.924 | 19.000 | 0.314 | 0.476 | 6.112 |
| 1.219  | 0.238 | 19.000 | 0.264 | 0.476 | 6.112 |
| -2.452 | 0.024 | 19.000 | 0.383 | 0.476 | 6.112 |
| -0.889 | 0.385 | 19.000 | 0.371 | 0.476 | 6.112 |
| -2.332 | 0.031 | 19.000 | 0.380 | 0.476 | 6.112 |
| -0.601 | 0.555 | 19.000 | 0.507 | 0.476 | 6.112 |
| -1.536 | 0.141 | 19.000 | 0.445 | 0.476 | 6.112 |
| -2.413 | 0.026 | 19.000 | 0.555 | 0.476 | 6.112 |
| 1.910  | 0.071 | 19.000 | 0.579 | 0.476 | 6.112 |
| -2.975 | 0.008 | 19.000 | 0.409 | 0.476 | 6.112 |
| 1.682  | 0.109 | 19.000 | 0.388 | 0.476 | 6.112 |
| 0.066  | 0.948 | 19.000 | 0.367 | 0.476 | 6.112 |
| -2.166 | 0.043 | 19.000 | 0.287 | 0.476 | 6.112 |
| 2.139  | 0.046 | 19.000 | 0.345 | 0.476 | 6.112 |
| 0.644  | 0.527 | 19.000 | 0.329 | 0.476 | 6.112 |
| -1.915 | 0.071 | 19.000 | 0.551 | 0.476 | 6.112 |
| 2.371  | 0.028 | 19.000 | 1.032 | 0.476 | 6.112 |
| -1.473 | 0.157 | 19.000 | 0.453 | 0.476 | 6.112 |
| -2.230 | 0.038 | 19.000 | 0.414 | 0.476 | 6.112 |
| 1.552  | 0.137 | 19.000 | 1.319 | 0.476 | 6.112 |
| -2.674 | 0.015 | 19.000 | 0.748 | 0.476 | 6.112 |
| 1.504  | 0.149 | 19.000 | 0.302 | 0.476 | 6.112 |
| -3.130 | 0.006 | 19.000 | 0.519 | 0.476 | 6.112 |
| -0.158 | 0.876 | 19.000 | 0.410 | 0.476 | 6.112 |
| 2.028  | 0.057 | 19.000 | 0.595 | 0.476 | 6.112 |
| 1.977  | 0.063 | 19.000 | 0.513 | 0.476 | 6.112 |

|        |       |        |       |       |       |
|--------|-------|--------|-------|-------|-------|
| 1.526  | 0.144 | 19.000 | 0.597 | 0.476 | 6.112 |
| 2.224  | 0.038 | 19.000 | 0.668 | 0.476 | 6.112 |
| 1.284  | 0.215 | 19.000 | 0.398 | 0.476 | 6.112 |
| -2.044 | 0.055 | 19.000 | 0.459 | 0.476 | 6.112 |
| -1.951 | 0.066 | 19.000 | 0.992 | 0.476 | 6.112 |
| -0.398 | 0.695 | 19.000 | 0.517 | 0.476 | 6.112 |
| 0.041  | 0.968 | 19.000 | 0.505 | 0.476 | 6.112 |
| -1.867 | 0.077 | 19.000 | 0.422 | 0.476 | 6.112 |
| -2.475 | 0.023 | 19.000 | 0.477 | 0.476 | 6.112 |
| -0.951 | 0.354 | 19.000 | 0.449 | 0.476 | 6.112 |
| -3.036 | 0.007 | 19.000 | 0.344 | 0.476 | 6.112 |
| 0.544  | 0.593 | 19.000 | 0.535 | 0.476 | 6.112 |
| 1.063  | 0.301 | 19.000 | 0.392 | 0.476 | 6.112 |
| -0.356 | 0.726 | 19.000 | 0.608 | 0.476 | 6.112 |
| 2.769  | 0.012 | 19.000 | 0.270 | 0.476 | 6.112 |
| 1.762  | 0.094 | 19.000 | 0.244 | 0.476 | 6.112 |
| 0.274  | 0.787 | 19.000 | 0.699 | 0.476 | 6.112 |
| 1.936  | 0.068 | 19.000 | 0.285 | 0.476 | 6.112 |
| 2.225  | 0.038 | 19.000 | 0.317 | 0.476 | 6.112 |
| 3.386  | 0.003 | 19.000 | 0.307 | 0.476 | 6.112 |
| -3.342 | 0.003 | 19.000 | 0.399 | 0.476 | 6.112 |
| -2.210 | 0.040 | 19.000 | 0.396 | 0.476 | 6.112 |
| -1.587 | 0.129 | 19.000 | 0.428 | 0.476 | 6.112 |
| 0.352  | 0.728 | 19.000 | 0.599 | 0.476 | 6.112 |
| 1.363  | 0.189 | 19.000 | 0.427 | 0.476 | 6.112 |
| -1.109 | 0.281 | 19.000 | 0.459 | 0.476 | 6.112 |
| -2.091 | 0.050 | 19.000 | 0.574 | 0.476 | 6.112 |
| 2.389  | 0.027 | 19.000 | 0.283 | 0.476 | 6.112 |
| 2.315  | 0.032 | 19.000 | 0.402 | 0.476 | 6.112 |
| 1.476  | 0.156 | 19.000 | 0.612 | 0.476 | 6.112 |
| 1.865  | 0.078 | 19.000 | 0.548 | 0.476 | 6.112 |
| 0.095  | 0.925 | 19.000 | 0.493 | 0.476 | 6.112 |
| -0.954 | 0.352 | 19.000 | 0.495 | 0.476 | 6.112 |
| -0.998 | 0.331 | 19.000 | 0.942 | 0.476 | 6.112 |
| 2.144  | 0.045 | 19.000 | 0.283 | 0.476 | 6.112 |
| 2.360  | 0.029 | 19.000 | 0.523 | 0.476 | 6.112 |
| 2.645  | 0.016 | 19.000 | 0.428 | 0.476 | 6.112 |
| 2.595  | 0.018 | 19.000 | 1.079 | 0.476 | 6.112 |
| -0.279 | 0.783 | 19.000 | 0.390 | 0.476 | 6.112 |
| -0.711 | 0.486 | 19.000 | 0.435 | 0.476 | 6.112 |
| 0.890  | 0.384 | 19.000 | 0.340 | 0.476 | 6.112 |
| 2.342  | 0.030 | 19.000 | 0.301 | 0.476 | 6.112 |
| 0.990  | 0.335 | 19.000 | 0.402 | 0.476 | 6.112 |
| 2.054  | 0.054 | 19.000 | 0.617 | 0.476 | 6.112 |
| 1.965  | 0.064 | 19.000 | 0.385 | 0.476 | 6.112 |
| 2.862  | 0.010 | 19.000 | 0.619 | 0.476 | 6.112 |
| 1.018  | 0.322 | 19.000 | 1.094 | 0.476 | 6.112 |
| -2.697 | 0.014 | 19.000 | 0.424 | 0.476 | 6.112 |
| 0.831  | 0.416 | 19.000 | 0.409 | 0.476 | 6.112 |
| 0.684  | 0.502 | 19.000 | 0.479 | 0.476 | 6.112 |



|        |       |        |       |       |       |
|--------|-------|--------|-------|-------|-------|
| -3.052 | 0.007 | 19.000 | 0.487 | 0.476 | 6.112 |
| 0.808  | 0.429 | 19.000 | 0.491 | 0.476 | 6.112 |
| -1.921 | 0.070 | 19.000 | 0.502 | 0.476 | 6.112 |
| -0.998 | 0.331 | 19.000 | 0.508 | 0.476 | 6.112 |
| 0.618  | 0.544 | 19.000 | 0.747 | 0.476 | 6.112 |
| 0.743  | 0.467 | 19.000 | 0.677 | 0.476 | 6.112 |
| -0.689 | 0.499 | 19.000 | 0.799 | 0.476 | 6.112 |
| 2.333  | 0.031 | 19.000 | 0.383 | 0.476 | 6.112 |
| 1.351  | 0.193 | 19.000 | 0.457 | 0.476 | 6.112 |
| -0.618 | 0.544 | 19.000 | 0.256 | 0.476 | 6.112 |
| 1.065  | 0.300 | 19.000 | 0.515 | 0.476 | 6.112 |
| 0.129  | 0.899 | 19.000 | 0.535 | 0.476 | 6.112 |
| 2.688  | 0.015 | 19.000 | 0.784 | 0.476 | 6.112 |
| 1.575  | 0.132 | 19.000 | 0.542 | 0.476 | 6.112 |
| -1.858 | 0.079 | 19.000 | 0.538 | 0.476 | 6.112 |
| -1.884 | 0.075 | 19.000 | 0.251 | 0.476 | 6.112 |
| -0.163 | 0.872 | 19.000 | 0.558 | 0.476 | 6.112 |
| -1.704 | 0.105 | 19.000 | 0.431 | 0.476 | 6.112 |
| -1.737 | 0.099 | 19.000 | 0.482 | 0.476 | 6.112 |
| 0.617  | 0.545 | 19.000 | 0.259 | 0.476 | 6.112 |
| -0.772 | 0.450 | 19.000 | 0.625 | 0.476 | 6.112 |
| 2.819  | 0.011 | 19.000 | 0.974 | 0.476 | 6.112 |
| -2.356 | 0.029 | 19.000 | 0.473 | 0.476 | 6.112 |
| -0.210 | 0.836 | 19.000 | 0.572 | 0.476 | 6.112 |
| 0.663  | 0.515 | 19.000 | 0.560 | 0.476 | 6.112 |
| -2.892 | 0.009 | 19.000 | 0.617 | 0.476 | 6.112 |
| -0.468 | 0.645 | 19.000 | 0.487 | 0.476 | 6.112 |
| 1.487  | 0.153 | 19.000 | 0.310 | 0.476 | 6.112 |
| -1.463 | 0.160 | 19.000 | 0.705 | 0.476 | 6.112 |
| -1.026 | 0.318 | 19.000 | 0.418 | 0.476 | 6.112 |
| -1.216 | 0.239 | 19.000 | 0.224 | 0.476 | 6.112 |
| -0.902 | 0.379 | 19.000 | 0.729 | 0.476 | 6.112 |
| 2.201  | 0.040 | 19.000 | 0.354 | 0.476 | 6.112 |
| 0.372  | 0.714 | 19.000 | 0.553 | 0.476 | 6.112 |
| 1.174  | 0.255 | 19.000 | 0.430 | 0.476 | 6.112 |
| -0.239 | 0.814 | 19.000 | 0.428 | 0.476 | 6.112 |
| 0.679  | 0.505 | 19.000 | 0.483 | 0.476 | 6.112 |
| -2.059 | 0.054 | 19.000 | 0.494 | 0.476 | 6.112 |
| -2.254 | 0.036 | 19.000 | 0.358 | 0.476 | 6.112 |
| -1.729 | 0.100 | 19.000 | 0.574 | 0.476 | 6.112 |
| 0.515  | 0.613 | 19.000 | 0.393 | 0.476 | 6.112 |
| -2.359 | 0.029 | 19.000 | 0.499 | 0.476 | 6.112 |
| 3.273  | 0.004 | 19.000 | 0.429 | 0.476 | 6.112 |
| -2.039 | 0.056 | 19.000 | 0.954 | 0.476 | 6.112 |
| -0.396 | 0.697 | 19.000 | 0.460 | 0.476 | 6.112 |
| 2.306  | 0.033 | 19.000 | 0.350 | 0.476 | 6.112 |
| 1.590  | 0.128 | 19.000 | 0.278 | 0.476 | 6.112 |
| -0.088 | 0.931 | 19.000 | 0.327 | 0.476 | 6.112 |
| -0.729 | 0.475 | 19.000 | 0.695 | 0.476 | 6.112 |
| -0.430 | 0.672 | 19.000 | 0.477 | 0.476 | 6.112 |

|        |       |        |       |       |       |
|--------|-------|--------|-------|-------|-------|
| -2.081 | 0.051 | 19.000 | 0.642 | 0.476 | 6.112 |
| -3.080 | 0.006 | 19.000 | 0.396 | 0.476 | 6.112 |
| 2.743  | 0.013 | 19.000 | 0.948 | 0.476 | 6.112 |
| -1.760 | 0.095 | 19.000 | 0.667 | 0.476 | 6.112 |
| 0.803  | 0.432 | 19.000 | 0.471 | 0.476 | 6.112 |
| -1.715 | 0.103 | 19.000 | 0.738 | 0.476 | 6.112 |
| 1.545  | 0.139 | 19.000 | 0.738 | 0.476 | 6.112 |
| -2.203 | 0.040 | 19.000 | 0.461 | 0.476 | 6.112 |
| 0.003  | 0.998 | 19.000 | 0.426 | 0.476 | 6.112 |
| -3.193 | 0.005 | 19.000 | 0.496 | 0.476 | 6.112 |
| -0.998 | 0.331 | 19.000 | 0.485 | 0.476 | 6.112 |
| 1.656  | 0.114 | 19.000 | 0.469 | 0.476 | 6.112 |
| 0.943  | 0.358 | 19.000 | 0.675 | 0.476 | 6.112 |
| 1.217  | 0.239 | 19.000 | 0.374 | 0.476 | 6.112 |
| -0.640 | 0.530 | 19.000 | 0.457 | 0.476 | 6.112 |
| -0.024 | 0.981 | 19.000 | 0.664 | 0.476 | 6.112 |
| 1.472  | 0.157 | 19.000 | 0.360 | 0.476 | 6.112 |
| -2.517 | 0.021 | 19.000 | 0.384 | 0.476 | 6.112 |
| -1.173 | 0.255 | 19.000 | 0.425 | 0.476 | 6.112 |
| 1.321  | 0.202 | 19.000 | 0.424 | 0.476 | 6.112 |
| 2.124  | 0.047 | 19.000 | 0.598 | 0.476 | 6.112 |
| -1.042 | 0.311 | 19.000 | 0.340 | 0.476 | 6.112 |
| 1.547  | 0.138 | 19.000 | 0.655 | 0.476 | 6.112 |
| -2.404 | 0.027 | 19.000 | 0.434 | 0.476 | 6.112 |
| -1.975 | 0.063 | 19.000 | 0.241 | 0.476 | 6.112 |
| -2.979 | 0.008 | 19.000 | 0.600 | 0.476 | 6.112 |
| -1.807 | 0.087 | 19.000 | 0.353 | 0.476 | 6.112 |
| -0.171 | 0.866 | 19.000 | 0.454 | 0.476 | 6.112 |
| -2.331 | 0.031 | 19.000 | 0.506 | 0.476 | 6.112 |
| 0.853  | 0.404 | 19.000 | 0.456 | 0.476 | 6.112 |
| 0.265  | 0.794 | 19.000 | 0.417 | 0.476 | 6.112 |
| -0.559 | 0.583 | 19.000 | 0.377 | 0.476 | 6.112 |
| -1.146 | 0.266 | 19.000 | 0.565 | 0.476 | 6.112 |
| 2.042  | 0.055 | 19.000 | 0.532 | 0.476 | 6.112 |
| 0.645  | 0.526 | 19.000 | 0.381 | 0.476 | 6.112 |
| 0.136  | 0.893 | 19.000 | 0.490 | 0.476 | 6.112 |
| 2.331  | 0.031 | 19.000 | 0.272 | 0.476 | 6.112 |
| 1.820  | 0.085 | 19.000 | 0.614 | 0.476 | 6.112 |
| 1.406  | 0.176 | 19.000 | 0.750 | 0.476 | 6.112 |
| 0.785  | 0.442 | 19.000 | 0.436 | 0.476 | 6.112 |
| 2.880  | 0.010 | 19.000 | 0.437 | 0.476 | 6.112 |
| 2.729  | 0.013 | 19.000 | 0.432 | 0.476 | 6.112 |
| 2.442  | 0.025 | 19.000 | 0.421 | 0.476 | 6.112 |
| 2.067  | 0.053 | 19.000 | 0.539 | 0.476 | 6.112 |
| 1.944  | 0.067 | 19.000 | 0.568 | 0.476 | 6.112 |
| 1.273  | 0.218 | 19.000 | 0.664 | 0.476 | 6.112 |
| 0.398  | 0.695 | 19.000 | 0.603 | 0.476 | 6.112 |
| -0.018 | 0.986 | 19.000 | 0.421 | 0.476 | 6.112 |
| -0.955 | 0.352 | 19.000 | 0.410 | 0.476 | 6.112 |
| 0.556  | 0.585 | 19.000 | 0.552 | 0.476 | 6.112 |

|        |       |        |       |       |       |
|--------|-------|--------|-------|-------|-------|
| -1.359 | 0.190 | 19.000 | 0.399 | 0.476 | 6.112 |
| 1.386  | 0.182 | 19.000 | 0.379 | 0.476 | 6.112 |
| -0.394 | 0.698 | 19.000 | 0.363 | 0.476 | 6.112 |
| -0.514 | 0.613 | 19.000 | 0.298 | 0.476 | 6.112 |
| 0.912  | 0.373 | 19.000 | 0.286 | 0.476 | 6.112 |
| -1.546 | 0.139 | 19.000 | 0.402 | 0.476 | 6.112 |
| -2.529 | 0.020 | 19.000 | 0.283 | 0.476 | 6.112 |
| 2.516  | 0.021 | 19.000 | 0.372 | 0.476 | 6.112 |
| 0.146  | 0.885 | 19.000 | 0.313 | 0.476 | 6.112 |
| 0.738  | 0.469 | 19.000 | 0.312 | 0.476 | 6.112 |
| 0.979  | 0.340 | 19.000 | 0.475 | 0.476 | 6.112 |
| 1.020  | 0.320 | 19.000 | 0.477 | 0.476 | 6.112 |
| 2.091  | 0.050 | 19.000 | 0.397 | 0.476 | 6.112 |
| -0.365 | 0.719 | 19.000 | 0.645 | 0.476 | 6.112 |
| -1.684 | 0.109 | 19.000 | 0.318 | 0.476 | 6.112 |
| 1.692  | 0.107 | 19.000 | 0.362 | 0.476 | 6.112 |
| -0.098 | 0.923 | 19.000 | 0.452 | 0.476 | 6.112 |
| -0.764 | 0.454 | 19.000 | 0.493 | 0.476 | 6.112 |
| 1.032  | 0.315 | 19.000 | 0.366 | 0.476 | 6.112 |
| 1.623  | 0.121 | 19.000 | 0.339 | 0.476 | 6.112 |
| 1.001  | 0.329 | 19.000 | 0.784 | 0.476 | 6.112 |
| 0.999  | 0.330 | 19.000 | 0.517 | 0.476 | 6.112 |
| 1.015  | 0.323 | 19.000 | 0.449 | 0.476 | 6.112 |
| -2.453 | 0.024 | 19.000 | 0.329 | 0.476 | 6.112 |
| -1.210 | 0.241 | 19.000 | 0.843 | 0.476 | 6.112 |
| 0.898  | 0.380 | 19.000 | 0.462 | 0.476 | 6.112 |
| -0.515 | 0.613 | 19.000 | 0.468 | 0.476 | 6.112 |
| 1.420  | 0.172 | 19.000 | 0.354 | 0.476 | 6.112 |
| 2.033  | 0.056 | 19.000 | 0.507 | 0.476 | 6.112 |
| 2.168  | 0.043 | 19.000 | 0.605 | 0.476 | 6.112 |
| -0.231 | 0.819 | 19.000 | 0.829 | 0.476 | 6.112 |
| 0.115  | 0.910 | 19.000 | 0.440 | 0.476 | 6.112 |
| -2.979 | 0.008 | 19.000 | 0.637 | 0.476 | 6.112 |
| -3.373 | 0.003 | 19.000 | 0.657 | 0.476 | 6.112 |
| -3.683 | 0.002 | 19.000 | 0.517 | 0.476 | 6.112 |
| 2.078  | 0.051 | 19.000 | 0.246 | 0.476 | 6.112 |
| 2.316  | 0.032 | 19.000 | 0.369 | 0.476 | 6.112 |
| 1.414  | 0.174 | 19.000 | 0.354 | 0.476 | 6.112 |
| 1.977  | 0.063 | 19.000 | 0.345 | 0.476 | 6.112 |
| -0.014 | 0.989 | 19.000 | 1.255 | 0.476 | 6.112 |
| -2.697 | 0.014 | 19.000 | 0.519 | 0.476 | 6.112 |
| 0.082  | 0.935 | 19.000 | 0.975 | 0.476 | 6.112 |
| 2.299  | 0.033 | 19.000 | 0.471 | 0.476 | 6.112 |
| 2.420  | 0.026 | 19.000 | 0.558 | 0.476 | 6.112 |
| 1.977  | 0.063 | 19.000 | 0.755 | 0.476 | 6.112 |
| 2.774  | 0.012 | 19.000 | 0.339 | 0.476 | 6.112 |
| -2.921 | 0.009 | 19.000 | 0.419 | 0.476 | 6.112 |
| 1.345  | 0.194 | 19.000 | 0.565 | 0.476 | 6.112 |
| 0.681  | 0.504 | 19.000 | 0.383 | 0.476 | 6.112 |
| -0.084 | 0.934 | 19.000 | 0.661 | 0.476 | 6.112 |

|        |       |        |       |       |       |
|--------|-------|--------|-------|-------|-------|
| 0.794  | 0.437 | 19.000 | 0.488 | 0.476 | 6.112 |
| 1.047  | 0.308 | 19.000 | 0.453 | 0.476 | 6.112 |
| 2.957  | 0.008 | 19.000 | 0.324 | 0.476 | 6.112 |
| -0.600 | 0.555 | 19.000 | 0.433 | 0.476 | 6.112 |
| 1.827  | 0.083 | 19.000 | 0.365 | 0.476 | 6.112 |
| 2.386  | 0.028 | 19.000 | 0.317 | 0.476 | 6.112 |
| 2.049  | 0.055 | 19.000 | 0.340 | 0.476 | 6.112 |
| 1.955  | 0.065 | 19.000 | 0.337 | 0.476 | 6.112 |
| 2.273  | 0.035 | 19.000 | 0.244 | 0.476 | 6.112 |
| 1.644  | 0.117 | 19.000 | 0.360 | 0.476 | 6.112 |
| 1.856  | 0.079 | 19.000 | 0.267 | 0.476 | 6.112 |
| 1.340  | 0.196 | 19.000 | 0.765 | 0.476 | 6.112 |
| 1.497  | 0.151 | 19.000 | 0.416 | 0.476 | 6.112 |
| 1.548  | 0.138 | 19.000 | 0.313 | 0.476 | 6.112 |
| 1.596  | 0.127 | 19.000 | 0.288 | 0.476 | 6.112 |
| 1.464  | 0.159 | 19.000 | 0.330 | 0.476 | 6.112 |
| 1.187  | 0.250 | 19.000 | 0.412 | 0.476 | 6.112 |
| 1.120  | 0.277 | 19.000 | 0.364 | 0.476 | 6.112 |
| 1.042  | 0.310 | 19.000 | 0.357 | 0.476 | 6.112 |
| 0.685  | 0.502 | 19.000 | 0.360 | 0.476 | 6.112 |
| 3.450  | 0.003 | 19.000 | 0.677 | 0.476 | 6.112 |
| 1.796  | 0.088 | 19.000 | 0.648 | 0.476 | 6.112 |
| 0.080  | 0.937 | 19.000 | 0.279 | 0.476 | 6.112 |
| 3.591  | 0.002 | 19.000 | 0.457 | 0.476 | 6.112 |
| 0.993  | 0.333 | 19.000 | 0.378 | 0.476 | 6.112 |
| 2.688  | 0.015 | 19.000 | 0.301 | 0.476 | 6.112 |
| 2.267  | 0.035 | 19.000 | 0.329 | 0.476 | 6.112 |
| 3.348  | 0.003 | 19.000 | 0.275 | 0.476 | 6.112 |
| 1.520  | 0.145 | 19.000 | 0.382 | 0.476 | 6.112 |
| -1.330 | 0.199 | 19.000 | 0.444 | 0.476 | 6.112 |
| -1.713 | 0.103 | 19.000 | 0.862 | 0.476 | 6.112 |
| 1.473  | 0.157 | 19.000 | 0.775 | 0.476 | 6.112 |
| 0.232  | 0.819 | 19.000 | 0.523 | 0.476 | 6.112 |
| 0.801  | 0.433 | 19.000 | 0.456 | 0.476 | 6.112 |
| -1.139 | 0.269 | 19.000 | 0.431 | 0.476 | 6.112 |
| -1.140 | 0.268 | 19.000 | 0.378 | 0.476 | 6.112 |
| -0.999 | 0.331 | 19.000 | 0.414 | 0.476 | 6.112 |
| -0.873 | 0.394 | 19.000 | 0.351 | 0.476 | 6.112 |
| -0.422 | 0.678 | 19.000 | 0.434 | 0.476 | 6.112 |
| 1.420  | 0.172 | 19.000 | 0.503 | 0.476 | 6.112 |
| 0.458  | 0.652 | 19.000 | 0.495 | 0.476 | 6.112 |
| -0.843 | 0.410 | 19.000 | 0.431 | 0.476 | 6.112 |
| -0.778 | 0.446 | 19.000 | 0.461 | 0.476 | 6.112 |
| -0.425 | 0.676 | 19.000 | 0.476 | 0.476 | 6.112 |
| -0.969 | 0.345 | 19.000 | 0.422 | 0.476 | 6.112 |
| 2.483  | 0.023 | 19.000 | 0.234 | 0.476 | 6.112 |
| 2.804  | 0.011 | 19.000 | 0.408 | 0.476 | 6.112 |
| 1.206  | 0.242 | 19.000 | 0.698 | 0.476 | 6.112 |
| -1.952 | 0.066 | 19.000 | 0.948 | 0.476 | 6.112 |
| -1.101 | 0.285 | 19.000 | 0.445 | 0.476 | 6.112 |

|        |       |        |       |       |       |
|--------|-------|--------|-------|-------|-------|
| -2.207 | 0.040 | 19.000 | 0.343 | 0.476 | 6.112 |
| 2.632  | 0.016 | 19.000 | 0.300 | 0.476 | 6.112 |
| 2.404  | 0.027 | 19.000 | 0.259 | 0.476 | 6.112 |
| 2.660  | 0.015 | 19.000 | 0.680 | 0.476 | 6.112 |
| 2.628  | 0.017 | 19.000 | 0.418 | 0.476 | 6.112 |
| -3.114 | 0.006 | 19.000 | 0.271 | 0.476 | 6.112 |
| 2.582  | 0.018 | 19.000 | 0.535 | 0.476 | 6.112 |
| -1.339 | 0.196 | 19.000 | 0.509 | 0.476 | 6.112 |
| 2.184  | 0.042 | 19.000 | 0.621 | 0.476 | 6.112 |
| -0.303 | 0.765 | 19.000 | 0.489 | 0.476 | 6.112 |
| 1.502  | 0.150 | 19.000 | 0.412 | 0.476 | 6.112 |
| -0.704 | 0.490 | 19.000 | 0.459 | 0.476 | 6.112 |
| -1.508 | 0.148 | 19.000 | 0.433 | 0.476 | 6.112 |
| -2.722 | 0.014 | 19.000 | 0.615 | 0.476 | 6.112 |
| 3.369  | 0.003 | 19.000 | 0.442 | 0.476 | 6.112 |
| 0.741  | 0.468 | 19.000 | 0.682 | 0.476 | 6.112 |
| 1.215  | 0.239 | 19.000 | 0.437 | 0.476 | 6.112 |
| -0.014 | 0.989 | 19.000 | 0.526 | 0.476 | 6.112 |
| 1.130  | 0.272 | 19.000 | 0.273 | 0.476 | 6.112 |
| 0.303  | 0.765 | 19.000 | 0.448 | 0.476 | 6.112 |
| 1.381  | 0.183 | 19.000 | 0.254 | 0.476 | 6.112 |
| 0.886  | 0.387 | 19.000 | 0.315 | 0.476 | 6.112 |
| -1.282 | 0.215 | 19.000 | 0.435 | 0.476 | 6.112 |
| 1.501  | 0.150 | 19.000 | 0.377 | 0.476 | 6.112 |
| 2.890  | 0.009 | 19.000 | 0.460 | 0.476 | 6.112 |
| 0.541  | 0.595 | 19.000 | 0.771 | 0.476 | 6.112 |
| 2.846  | 0.010 | 19.000 | 0.357 | 0.476 | 6.112 |
| 2.130  | 0.046 | 19.000 | 0.356 | 0.476 | 6.112 |
| -2.496 | 0.022 | 19.000 | 0.448 | 0.476 | 6.112 |
| -1.183 | 0.251 | 19.000 | 0.553 | 0.476 | 6.112 |
| 0.225  | 0.824 | 19.000 | 1.242 | 0.476 | 6.112 |
| 2.148  | 0.045 | 19.000 | 0.647 | 0.476 | 6.112 |
| 2.605  | 0.017 | 19.000 | 0.488 | 0.476 | 6.112 |
| -1.345 | 0.194 | 19.000 | 0.503 | 0.476 | 6.112 |
| -3.505 | 0.002 | 19.000 | 0.824 | 0.476 | 6.112 |
| 1.802  | 0.087 | 19.000 | 0.595 | 0.476 | 6.112 |
| 1.490  | 0.153 | 19.000 | 0.214 | 0.476 | 6.112 |
| 1.718  | 0.102 | 19.000 | 0.495 | 0.476 | 6.112 |
| 2.140  | 0.046 | 19.000 | 0.728 | 0.476 | 6.112 |
| 1.306  | 0.207 | 19.000 | 0.471 | 0.476 | 6.112 |
| 2.915  | 0.009 | 19.000 | 0.664 | 0.476 | 6.112 |
| 3.021  | 0.007 | 19.000 | 0.615 | 0.476 | 6.112 |
| -0.848 | 0.407 | 19.000 | 0.395 | 0.476 | 6.112 |
| 2.428  | 0.025 | 19.000 | 0.567 | 0.476 | 6.112 |
| 2.819  | 0.011 | 19.000 | 1.410 | 0.476 | 6.112 |
| 1.862  | 0.078 | 19.000 | 0.355 | 0.476 | 6.112 |
| -0.303 | 0.765 | 19.000 | 0.503 | 0.476 | 6.112 |
| -1.473 | 0.157 | 19.000 | 0.555 | 0.476 | 6.112 |
| -1.875 | 0.076 | 19.000 | 0.271 | 0.476 | 6.112 |
| -1.601 | 0.126 | 19.000 | 0.239 | 0.476 | 6.112 |

|        |       |        |       |       |       |
|--------|-------|--------|-------|-------|-------|
| -1.300 | 0.209 | 19.000 | 0.452 | 0.476 | 6.112 |
| 1.772  | 0.092 | 19.000 | 0.506 | 0.476 | 6.112 |
| -2.053 | 0.054 | 19.000 | 0.819 | 0.476 | 6.112 |
| -1.038 | 0.312 | 19.000 | 0.921 | 0.476 | 6.112 |
| -0.112 | 0.912 | 19.000 | 0.766 | 0.476 | 6.112 |
| 0.394  | 0.698 | 19.000 | 0.605 | 0.476 | 6.112 |
| -1.758 | 0.095 | 19.000 | 0.409 | 0.476 | 6.112 |
| 2.692  | 0.014 | 19.000 | 0.775 | 0.476 | 6.112 |
| 0.053  | 0.958 | 19.000 | 0.460 | 0.476 | 6.112 |
| 0.216  | 0.831 | 19.000 | 0.483 | 0.476 | 6.112 |
| 0.833  | 0.415 | 19.000 | 0.815 | 0.476 | 6.112 |
| 2.423  | 0.026 | 19.000 | 0.700 | 0.476 | 6.112 |
| 1.183  | 0.251 | 19.000 | 0.345 | 0.476 | 6.112 |
| 1.920  | 0.070 | 19.000 | 0.459 | 0.476 | 6.112 |
| 1.826  | 0.084 | 19.000 | 0.309 | 0.476 | 6.112 |
| -0.883 | 0.388 | 19.000 | 0.919 | 0.476 | 6.112 |
| 0.036  | 0.972 | 19.000 | 0.690 | 0.476 | 6.112 |
| 2.615  | 0.017 | 19.000 | 0.531 | 0.476 | 6.112 |
| -0.757 | 0.458 | 19.000 | 0.430 | 0.476 | 6.112 |
| -0.502 | 0.622 | 19.000 | 0.379 | 0.476 | 6.112 |
| -1.313 | 0.205 | 19.000 | 0.690 | 0.476 | 6.112 |
| 0.775  | 0.448 | 19.000 | 0.498 | 0.476 | 6.112 |
| -2.404 | 0.027 | 19.000 | 0.425 | 0.476 | 6.112 |
| -3.178 | 0.005 | 19.000 | 0.606 | 0.476 | 6.112 |
| -1.971 | 0.064 | 19.000 | 0.484 | 0.476 | 6.112 |
| 2.210  | 0.040 | 19.000 | 0.787 | 0.476 | 6.112 |
| -1.249 | 0.227 | 19.000 | 0.694 | 0.476 | 6.112 |
| 1.098  | 0.286 | 19.000 | 0.429 | 0.476 | 6.112 |
| 0.418  | 0.681 | 19.000 | 0.379 | 0.476 | 6.112 |
| 0.326  | 0.748 | 19.000 | 0.383 | 0.476 | 6.112 |
| 2.164  | 0.043 | 19.000 | 0.683 | 0.476 | 6.112 |
| 1.807  | 0.087 | 19.000 | 0.544 | 0.476 | 6.112 |
| -2.440 | 0.025 | 19.000 | 0.434 | 0.476 | 6.112 |
| -0.055 | 0.957 | 19.000 | 0.452 | 0.476 | 6.112 |
| 2.889  | 0.009 | 19.000 | 0.469 | 0.476 | 6.112 |
| 1.958  | 0.065 | 19.000 | 0.378 | 0.476 | 6.112 |
| -2.074 | 0.052 | 19.000 | 0.454 | 0.476 | 6.112 |
| 1.901  | 0.073 | 19.000 | 0.369 | 0.476 | 6.112 |
| -1.894 | 0.074 | 19.000 | 0.399 | 0.476 | 6.112 |
| -2.115 | 0.048 | 19.000 | 0.774 | 0.476 | 6.112 |
| -0.179 | 0.860 | 19.000 | 0.952 | 0.476 | 6.112 |
| 2.233  | 0.038 | 19.000 | 0.745 | 0.476 | 6.112 |
| -0.304 | 0.764 | 19.000 | 0.611 | 0.476 | 6.112 |
| -1.407 | 0.175 | 19.000 | 0.472 | 0.476 | 6.112 |
| -2.484 | 0.023 | 19.000 | 0.472 | 0.476 | 6.112 |
| -1.456 | 0.162 | 19.000 | 0.281 | 0.476 | 6.112 |
| 1.274  | 0.218 | 19.000 | 0.399 | 0.476 | 6.112 |
| 1.241  | 0.230 | 19.000 | 0.411 | 0.476 | 6.112 |
| -0.393 | 0.699 | 19.000 | 0.318 | 0.476 | 6.112 |
| -2.326 | 0.031 | 19.000 | 0.226 | 0.476 | 6.112 |

|        |       |        |       |       |       |
|--------|-------|--------|-------|-------|-------|
| -1.512 | 0.147 | 19.000 | 0.260 | 0.476 | 6.112 |
| -0.788 | 0.441 | 19.000 | 0.308 | 0.476 | 6.112 |
| -1.278 | 0.217 | 19.000 | 0.261 | 0.476 | 6.112 |
| -0.660 | 0.517 | 19.000 | 0.291 | 0.476 | 6.112 |
| 2.628  | 0.017 | 19.000 | 0.310 | 0.476 | 6.112 |
| -0.028 | 0.978 | 19.000 | 0.474 | 0.476 | 6.112 |
| 0.545  | 0.592 | 19.000 | 0.291 | 0.476 | 6.112 |
| -0.524 | 0.607 | 19.000 | 0.649 | 0.476 | 6.112 |
| 0.979  | 0.340 | 19.000 | 0.365 | 0.476 | 6.112 |
| -1.559 | 0.136 | 19.000 | 0.457 | 0.476 | 6.112 |
| 0.401  | 0.693 | 19.000 | 0.486 | 0.476 | 6.112 |
| -1.938 | 0.068 | 19.000 | 0.622 | 0.476 | 6.112 |
| -1.900 | 0.073 | 19.000 | 0.314 | 0.476 | 6.112 |
| -1.817 | 0.085 | 19.000 | 0.416 | 0.476 | 6.112 |
| -0.475 | 0.641 | 19.000 | 0.477 | 0.476 | 6.112 |
| 1.759  | 0.095 | 19.000 | 0.445 | 0.476 | 6.112 |
| -0.975 | 0.342 | 19.000 | 0.407 | 0.476 | 6.112 |
| 2.007  | 0.059 | 19.000 | 0.633 | 0.476 | 6.112 |
| -0.600 | 0.556 | 19.000 | 0.425 | 0.476 | 6.112 |
| 1.872  | 0.077 | 19.000 | 0.382 | 0.476 | 6.112 |
| -0.835 | 0.414 | 19.000 | 0.910 | 0.476 | 6.112 |
| -2.077 | 0.052 | 19.000 | 0.317 | 0.476 | 6.112 |
| -1.922 | 0.070 | 19.000 | 0.577 | 0.476 | 6.112 |
| -0.969 | 0.345 | 19.000 | 0.470 | 0.476 | 6.112 |
| 1.059  | 0.303 | 19.000 | 0.329 | 0.476 | 6.112 |
| 1.524  | 0.144 | 19.000 | 0.440 | 0.476 | 6.112 |
| 1.286  | 0.214 | 19.000 | 0.410 | 0.476 | 6.112 |
| 1.633  | 0.119 | 19.000 | 0.447 | 0.476 | 6.112 |
| -2.304 | 0.033 | 19.000 | 0.630 | 0.476 | 6.112 |
| 2.287  | 0.034 | 19.000 | 0.648 | 0.476 | 6.112 |
| -1.304 | 0.208 | 19.000 | 0.311 | 0.476 | 6.112 |
| 3.055  | 0.007 | 19.000 | 0.686 | 0.476 | 6.112 |
| 2.815  | 0.011 | 19.000 | 0.871 | 0.476 | 6.112 |
| -1.143 | 0.267 | 19.000 | 0.557 | 0.476 | 6.112 |
| 1.817  | 0.085 | 19.000 | 0.556 | 0.476 | 6.112 |
| 3.230  | 0.004 | 19.000 | 0.371 | 0.476 | 6.112 |
| 1.994  | 0.061 | 19.000 | 0.352 | 0.476 | 6.112 |
| 2.249  | 0.037 | 19.000 | 0.474 | 0.476 | 6.112 |
| -1.035 | 0.314 | 19.000 | 0.416 | 0.476 | 6.112 |
| 1.005  | 0.328 | 19.000 | 0.386 | 0.476 | 6.112 |
| 0.834  | 0.414 | 19.000 | 0.664 | 0.476 | 6.112 |
| 1.988  | 0.061 | 19.000 | 0.858 | 0.476 | 6.112 |
| 2.783  | 0.012 | 19.000 | 0.372 | 0.476 | 6.112 |
| 1.965  | 0.064 | 19.000 | 1.065 | 0.476 | 6.112 |
| -1.565 | 0.134 | 19.000 | 0.494 | 0.476 | 6.112 |
| -1.271 | 0.219 | 19.000 | 0.700 | 0.476 | 6.112 |
| -1.821 | 0.084 | 19.000 | 0.368 | 0.476 | 6.112 |
| -1.086 | 0.291 | 19.000 | 0.368 | 0.476 | 6.112 |
| -1.936 | 0.068 | 19.000 | 0.517 | 0.476 | 6.112 |
| 3.340  | 0.003 | 19.000 | 0.418 | 0.476 | 6.112 |

|        |       |        |       |       |       |
|--------|-------|--------|-------|-------|-------|
| -1.827 | 0.083 | 19.000 | 0.682 | 0.476 | 6.112 |
| -0.717 | 0.482 | 19.000 | 0.293 | 0.476 | 6.112 |
| 1.077  | 0.295 | 19.000 | 0.289 | 0.476 | 6.112 |
| 1.728  | 0.100 | 19.000 | 0.354 | 0.476 | 6.112 |
| 2.012  | 0.059 | 19.000 | 0.835 | 0.476 | 6.112 |
| 2.572  | 0.019 | 19.000 | 0.857 | 0.476 | 6.112 |
| 1.737  | 0.099 | 19.000 | 0.635 | 0.476 | 6.112 |
| 2.152  | 0.044 | 19.000 | 0.809 | 0.476 | 6.112 |
| 2.365  | 0.029 | 19.000 | 1.026 | 0.476 | 6.112 |
| -1.849 | 0.080 | 19.000 | 0.456 | 0.476 | 6.112 |
| -0.193 | 0.849 | 19.000 | 0.366 | 0.476 | 6.112 |
| -0.849 | 0.406 | 19.000 | 0.469 | 0.476 | 6.112 |
| 1.891  | 0.074 | 19.000 | 0.305 | 0.476 | 6.112 |
| 2.075  | 0.052 | 19.000 | 0.330 | 0.476 | 6.112 |
| -0.894 | 0.382 | 19.000 | 0.390 | 0.476 | 6.112 |
| 2.501  | 0.022 | 19.000 | 0.255 | 0.476 | 6.112 |
| 0.562  | 0.581 | 19.000 | 0.413 | 0.476 | 6.112 |
| 1.129  | 0.273 | 19.000 | 0.779 | 0.476 | 6.112 |
| 0.809  | 0.429 | 19.000 | 0.360 | 0.476 | 6.112 |
| 2.164  | 0.043 | 19.000 | 0.310 | 0.476 | 6.112 |
| 1.489  | 0.153 | 19.000 | 0.826 | 0.476 | 6.112 |
| 2.664  | 0.015 | 19.000 | 0.442 | 0.476 | 6.112 |
| 1.705  | 0.104 | 19.000 | 0.489 | 0.476 | 6.112 |
| 1.156  | 0.262 | 19.000 | 0.537 | 0.476 | 6.112 |
| -1.437 | 0.167 | 19.000 | 0.442 | 0.476 | 6.112 |
| 0.828  | 0.418 | 19.000 | 0.324 | 0.476 | 6.112 |
| -0.770 | 0.451 | 19.000 | 0.453 | 0.476 | 6.112 |
| -2.717 | 0.014 | 19.000 | 0.557 | 0.476 | 6.112 |
| -2.399 | 0.027 | 19.000 | 0.277 | 0.476 | 6.112 |
| -0.923 | 0.367 | 19.000 | 0.833 | 0.476 | 6.112 |
| -2.222 | 0.039 | 19.000 | 0.355 | 0.476 | 6.112 |
| -2.449 | 0.024 | 19.000 | 0.333 | 0.476 | 6.112 |
| -0.323 | 0.750 | 19.000 | 0.652 | 0.476 | 6.112 |
| -0.713 | 0.485 | 19.000 | 0.832 | 0.476 | 6.112 |
| -2.859 | 0.010 | 19.000 | 0.436 | 0.476 | 6.112 |
| 0.157  | 0.877 | 19.000 | 0.524 | 0.476 | 6.112 |
| -1.779 | 0.091 | 19.000 | 0.423 | 0.476 | 6.112 |
| -2.896 | 0.009 | 19.000 | 0.467 | 0.476 | 6.112 |
| 1.282  | 0.215 | 19.000 | 0.393 | 0.476 | 6.112 |
| 0.886  | 0.386 | 19.000 | 0.492 | 0.476 | 6.112 |
| 0.066  | 0.948 | 19.000 | 0.511 | 0.476 | 6.112 |
| -0.356 | 0.726 | 19.000 | 0.397 | 0.476 | 6.112 |
| -0.086 | 0.932 | 19.000 | 0.344 | 0.476 | 6.112 |
| -2.653 | 0.016 | 19.000 | 0.404 | 0.476 | 6.112 |
| 2.479  | 0.023 | 19.000 | 0.634 | 0.476 | 6.112 |
| -1.764 | 0.094 | 19.000 | 0.649 | 0.476 | 6.112 |
| 0.871  | 0.394 | 19.000 | 0.387 | 0.476 | 6.112 |
| 2.352  | 0.030 | 19.000 | 0.305 | 0.476 | 6.112 |
| 0.918  | 0.370 | 19.000 | 0.256 | 0.476 | 6.112 |
| 1.796  | 0.088 | 19.000 | 0.416 | 0.476 | 6.112 |



|        |       |        |       |       |       |
|--------|-------|--------|-------|-------|-------|
| -0.390 | 0.701 | 19.000 | 0.389 | 0.476 | 6.112 |
| 1.975  | 0.063 | 19.000 | 0.720 | 0.476 | 6.112 |
| 0.716  | 0.483 | 19.000 | 0.440 | 0.476 | 6.112 |
| 2.556  | 0.019 | 19.000 | 0.240 | 0.476 | 6.112 |
| 2.772  | 0.012 | 19.000 | 0.681 | 0.476 | 6.112 |
| 0.776  | 0.447 | 19.000 | 0.451 | 0.476 | 6.112 |
| 2.198  | 0.041 | 19.000 | 1.082 | 0.476 | 6.112 |
| -0.284 | 0.779 | 19.000 | 0.295 | 0.476 | 6.112 |
| -0.950 | 0.354 | 19.000 | 0.449 | 0.476 | 6.112 |
| -0.891 | 0.384 | 19.000 | 0.309 | 0.476 | 6.112 |
| 2.125  | 0.047 | 19.000 | 0.379 | 0.476 | 6.112 |
| 0.662  | 0.516 | 19.000 | 0.581 | 0.476 | 6.112 |
| 1.203  | 0.244 | 19.000 | 0.382 | 0.476 | 6.112 |
| 1.861  | 0.078 | 19.000 | 0.756 | 0.476 | 6.112 |
| 0.800  | 0.434 | 19.000 | 1.028 | 0.476 | 6.112 |
| 1.366  | 0.188 | 19.000 | 0.951 | 0.476 | 6.112 |
| 0.228  | 0.822 | 19.000 | 0.475 | 0.476 | 6.112 |
| 3.256  | 0.004 | 19.000 | 0.187 | 0.476 | 6.112 |
| -0.041 | 0.968 | 19.000 | 0.359 | 0.476 | 6.112 |
| 0.560  | 0.582 | 19.000 | 0.359 | 0.476 | 6.112 |
| 2.234  | 0.038 | 19.000 | 0.334 | 0.476 | 6.112 |
| -0.240 | 0.813 | 19.000 | 0.873 | 0.476 | 6.112 |
| 1.370  | 0.187 | 19.000 | 0.239 | 0.476 | 6.112 |
| 1.846  | 0.081 | 19.000 | 0.240 | 0.476 | 6.112 |
| 1.988  | 0.061 | 19.000 | 0.686 | 0.476 | 6.112 |
| -0.180 | 0.859 | 19.000 | 0.823 | 0.476 | 6.112 |
| 0.814  | 0.426 | 19.000 | 0.618 | 0.476 | 6.112 |
| 0.794  | 0.437 | 19.000 | 0.485 | 0.476 | 6.112 |
| 1.706  | 0.104 | 19.000 | 0.379 | 0.476 | 6.112 |
| 0.808  | 0.429 | 19.000 | 0.349 | 0.476 | 6.112 |
| -1.966 | 0.064 | 19.000 | 0.478 | 0.476 | 6.112 |
| 1.868  | 0.077 | 19.000 | 0.324 | 0.476 | 6.112 |
| 0.405  | 0.690 | 19.000 | 0.459 | 0.476 | 6.112 |
| 1.836  | 0.082 | 19.000 | 0.320 | 0.476 | 6.112 |
| 1.341  | 0.196 | 19.000 | 0.288 | 0.476 | 6.112 |
| -0.628 | 0.538 | 19.000 | 0.390 | 0.476 | 6.112 |
| -2.313 | 0.032 | 19.000 | 0.366 | 0.476 | 6.112 |
| 1.975  | 0.063 | 19.000 | 0.375 | 0.476 | 6.112 |
| 2.874  | 0.010 | 19.000 | 0.348 | 0.476 | 6.112 |
| -1.365 | 0.188 | 19.000 | 0.447 | 0.476 | 6.112 |
| 2.196  | 0.041 | 19.000 | 0.684 | 0.476 | 6.112 |
| -0.341 | 0.737 | 19.000 | 0.319 | 0.476 | 6.112 |
| -0.875 | 0.393 | 19.000 | 0.659 | 0.476 | 6.112 |
| -1.920 | 0.070 | 19.000 | 0.315 | 0.476 | 6.112 |
| 0.122  | 0.904 | 19.000 | 0.716 | 0.476 | 6.112 |
| 1.594  | 0.127 | 19.000 | 0.649 | 0.476 | 6.112 |
| 1.262  | 0.222 | 19.000 | 0.353 | 0.476 | 6.112 |
| 0.782  | 0.444 | 19.000 | 0.471 | 0.476 | 6.112 |
| 2.618  | 0.017 | 19.000 | 0.701 | 0.476 | 6.112 |
| 2.015  | 0.058 | 19.000 | 0.880 | 0.476 | 6.112 |

|        |       |        |       |       |       |
|--------|-------|--------|-------|-------|-------|
| 1.648  | 0.116 | 19.000 | 0.326 | 0.476 | 6.112 |
| 1.360  | 0.190 | 19.000 | 0.433 | 0.476 | 6.112 |
| 2.334  | 0.031 | 19.000 | 0.349 | 0.476 | 6.112 |
| 2.493  | 0.022 | 19.000 | 0.757 | 0.476 | 6.112 |
| 1.611  | 0.124 | 19.000 | 0.518 | 0.476 | 6.112 |
| 1.956  | 0.065 | 19.000 | 0.762 | 0.476 | 6.112 |
| 1.792  | 0.089 | 19.000 | 0.369 | 0.476 | 6.112 |
| 2.482  | 0.023 | 19.000 | 0.405 | 0.476 | 6.112 |
| 1.547  | 0.138 | 19.000 | 0.651 | 0.476 | 6.112 |
| -0.197 | 0.846 | 19.000 | 0.427 | 0.476 | 6.112 |
| -2.258 | 0.036 | 19.000 | 0.239 | 0.476 | 6.112 |
| -1.293 | 0.212 | 19.000 | 0.541 | 0.476 | 6.112 |
| 2.714  | 0.014 | 19.000 | 0.233 | 0.476 | 6.112 |
| 1.629  | 0.120 | 19.000 | 0.333 | 0.476 | 6.112 |
| -0.725 | 0.477 | 19.000 | 0.525 | 0.476 | 6.112 |
| -0.451 | 0.657 | 19.000 | 0.399 | 0.476 | 6.112 |
| 0.040  | 0.968 | 19.000 | 0.414 | 0.476 | 6.112 |
| -0.935 | 0.362 | 19.000 | 0.462 | 0.476 | 6.112 |
| -0.626 | 0.539 | 19.000 | 0.384 | 0.476 | 6.112 |
| -0.274 | 0.787 | 19.000 | 0.429 | 0.476 | 6.112 |
| 0.628  | 0.537 | 19.000 | 0.418 | 0.476 | 6.112 |
| -0.766 | 0.453 | 19.000 | 0.477 | 0.476 | 6.112 |
| -0.334 | 0.742 | 19.000 | 0.414 | 0.476 | 6.112 |
| -1.240 | 0.230 | 19.000 | 0.346 | 0.476 | 6.112 |
| -0.235 | 0.817 | 19.000 | 0.495 | 0.476 | 6.112 |
| -0.336 | 0.740 | 19.000 | 0.647 | 0.476 | 6.112 |
| -0.271 | 0.789 | 19.000 | 0.496 | 0.476 | 6.112 |
| -0.521 | 0.608 | 19.000 | 0.474 | 0.476 | 6.112 |
| 0.388  | 0.703 | 19.000 | 0.446 | 0.476 | 6.112 |
| 3.059  | 0.006 | 19.000 | 0.397 | 0.476 | 6.112 |
| -1.894 | 0.074 | 19.000 | 0.480 | 0.476 | 6.112 |
| 1.514  | 0.146 | 19.000 | 0.797 | 0.476 | 6.112 |
| 2.336  | 0.031 | 19.000 | 0.760 | 0.476 | 6.112 |
| 1.133  | 0.271 | 19.000 | 0.416 | 0.476 | 6.112 |
| -2.266 | 0.035 | 19.000 | 0.499 | 0.476 | 6.112 |
| 1.445  | 0.165 | 19.000 | 0.612 | 0.476 | 6.112 |
| 2.419  | 0.026 | 19.000 | 0.437 | 0.476 | 6.112 |
| 2.990  | 0.008 | 19.000 | 0.797 | 0.476 | 6.112 |
| 1.427  | 0.170 | 19.000 | 0.435 | 0.476 | 6.112 |
| -2.721 | 0.014 | 19.000 | 0.830 | 0.476 | 6.112 |
| -0.751 | 0.462 | 19.000 | 0.557 | 0.476 | 6.112 |
| 1.267  | 0.220 | 19.000 | 0.349 | 0.476 | 6.112 |
| 1.454  | 0.162 | 19.000 | 0.515 | 0.476 | 6.112 |
| 1.820  | 0.085 | 19.000 | 0.469 | 0.476 | 6.112 |
| 3.626  | 0.002 | 19.000 | 0.649 | 0.476 | 6.112 |
| -2.804 | 0.011 | 19.000 | 0.463 | 0.476 | 6.112 |
| -0.969 | 0.345 | 19.000 | 0.391 | 0.476 | 6.112 |
| -2.708 | 0.014 | 19.000 | 0.739 | 0.476 | 6.112 |
| 0.288  | 0.777 | 19.000 | 0.396 | 0.476 | 6.112 |
| -1.381 | 0.183 | 19.000 | 0.446 | 0.476 | 6.112 |

|        |       |        |       |       |       |
|--------|-------|--------|-------|-------|-------|
| -1.682 | 0.109 | 19.000 | 0.316 | 0.476 | 6.112 |
| -2.325 | 0.031 | 19.000 | 0.670 | 0.476 | 6.112 |
| 2.841  | 0.010 | 19.000 | 0.290 | 0.476 | 6.112 |
| 1.474  | 0.157 | 19.000 | 0.343 | 0.476 | 6.112 |
| 0.276  | 0.785 | 19.000 | 0.483 | 0.476 | 6.112 |
| -1.700 | 0.106 | 19.000 | 0.351 | 0.476 | 6.112 |
| 2.062  | 0.053 | 19.000 | 1.006 | 0.476 | 6.112 |
| 2.082  | 0.051 | 19.000 | 0.488 | 0.476 | 6.112 |
| 2.688  | 0.015 | 19.000 | 1.107 | 0.476 | 6.112 |
| 0.110  | 0.914 | 19.000 | 0.455 | 0.476 | 6.112 |
| 1.520  | 0.145 | 19.000 | 0.547 | 0.476 | 6.112 |
| -0.137 | 0.893 | 19.000 | 0.598 | 0.476 | 6.112 |
| 0.707  | 0.488 | 19.000 | 0.374 | 0.476 | 6.112 |
| 0.143  | 0.888 | 19.000 | 0.365 | 0.476 | 6.112 |
| -0.818 | 0.423 | 19.000 | 0.324 | 0.476 | 6.112 |
| -0.099 | 0.922 | 19.000 | 0.531 | 0.476 | 6.112 |
| 0.078  | 0.939 | 19.000 | 0.441 | 0.476 | 6.112 |
| -1.854 | 0.079 | 19.000 | 0.307 | 0.476 | 6.112 |
| 2.207  | 0.040 | 19.000 | 0.817 | 0.476 | 6.112 |
| -0.943 | 0.357 | 19.000 | 0.862 | 0.476 | 6.112 |
| 0.153  | 0.880 | 19.000 | 0.480 | 0.476 | 6.112 |
| 1.470  | 0.158 | 19.000 | 0.366 | 0.476 | 6.112 |
| -2.491 | 0.022 | 19.000 | 0.520 | 0.476 | 6.112 |
| 1.932  | 0.068 | 19.000 | 0.270 | 0.476 | 6.112 |
| -0.268 | 0.791 | 19.000 | 0.344 | 0.476 | 6.112 |
| 1.886  | 0.075 | 19.000 | 0.398 | 0.476 | 6.112 |
| -0.806 | 0.430 | 19.000 | 0.581 | 0.476 | 6.112 |
| 1.493  | 0.152 | 19.000 | 0.567 | 0.476 | 6.112 |
| 0.409  | 0.687 | 19.000 | 0.508 | 0.476 | 6.112 |
| -2.216 | 0.039 | 19.000 | 0.530 | 0.476 | 6.112 |
| -1.109 | 0.281 | 19.000 | 0.367 | 0.476 | 6.112 |
| 0.185  | 0.855 | 19.000 | 0.385 | 0.476 | 6.112 |
| 1.583  | 0.130 | 19.000 | 0.507 | 0.476 | 6.112 |
| 1.315  | 0.204 | 19.000 | 0.499 | 0.476 | 6.112 |
| -2.392 | 0.027 | 19.000 | 0.575 | 0.476 | 6.112 |
| -1.841 | 0.081 | 19.000 | 0.310 | 0.476 | 6.112 |
| 1.558  | 0.136 | 19.000 | 0.247 | 0.476 | 6.112 |
| -0.178 | 0.860 | 19.000 | 0.431 | 0.476 | 6.112 |
| -1.368 | 0.187 | 19.000 | 0.368 | 0.476 | 6.112 |
| -0.717 | 0.482 | 19.000 | 0.487 | 0.476 | 6.112 |
| 1.754  | 0.096 | 19.000 | 0.606 | 0.476 | 6.112 |
| 0.713  | 0.485 | 19.000 | 0.904 | 0.476 | 6.112 |
| -2.278 | 0.034 | 19.000 | 0.426 | 0.476 | 6.112 |
| 1.332  | 0.199 | 19.000 | 0.388 | 0.476 | 6.112 |
| 2.139  | 0.046 | 19.000 | 0.309 | 0.476 | 6.112 |
| 0.711  | 0.486 | 19.000 | 0.444 | 0.476 | 6.112 |
| 1.175  | 0.254 | 19.000 | 0.784 | 0.476 | 6.112 |
| -1.504 | 0.149 | 19.000 | 0.260 | 0.476 | 6.112 |
| 1.941  | 0.067 | 19.000 | 0.390 | 0.476 | 6.112 |
| 0.938  | 0.360 | 19.000 | 0.434 | 0.476 | 6.112 |

|        |       |        |       |       |       |
|--------|-------|--------|-------|-------|-------|
| -2.511 | 0.021 | 19.000 | 0.445 | 0.476 | 6.112 |
| 0.976  | 0.341 | 19.000 | 0.287 | 0.476 | 6.112 |
| -0.455 | 0.654 | 19.000 | 0.456 | 0.476 | 6.112 |
| 2.388  | 0.028 | 19.000 | 1.041 | 0.476 | 6.112 |
| 0.048  | 0.962 | 19.000 | 0.413 | 0.476 | 6.112 |
| 1.562  | 0.135 | 19.000 | 0.586 | 0.476 | 6.112 |
| -2.484 | 0.022 | 19.000 | 0.534 | 0.476 | 6.112 |
| -0.390 | 0.701 | 19.000 | 0.357 | 0.476 | 6.112 |
| -1.863 | 0.078 | 19.000 | 0.346 | 0.476 | 6.112 |
| -1.054 | 0.305 | 19.000 | 0.397 | 0.476 | 6.112 |
| 0.682  | 0.504 | 19.000 | 0.424 | 0.476 | 6.112 |
| -1.868 | 0.077 | 19.000 | 0.552 | 0.476 | 6.112 |
| -0.577 | 0.571 | 19.000 | 0.434 | 0.476 | 6.112 |
| -0.665 | 0.514 | 19.000 | 0.367 | 0.476 | 6.112 |
| 1.084  | 0.292 | 19.000 | 0.295 | 0.476 | 6.112 |
| 1.628  | 0.120 | 19.000 | 0.228 | 0.476 | 6.112 |
| 1.293  | 0.211 | 19.000 | 0.235 | 0.476 | 6.112 |
| 1.282  | 0.215 | 19.000 | 0.233 | 0.476 | 6.112 |
| 1.588  | 0.129 | 19.000 | 0.818 | 0.476 | 6.112 |
| -1.191 | 0.248 | 19.000 | 0.990 | 0.476 | 6.112 |
| -1.357 | 0.191 | 19.000 | 0.641 | 0.476 | 6.112 |
| -1.593 | 0.128 | 19.000 | 0.414 | 0.476 | 6.112 |
| 1.665  | 0.112 | 19.000 | 0.440 | 0.476 | 6.112 |
| 0.757  | 0.458 | 19.000 | 0.855 | 0.476 | 6.112 |
| 1.743  | 0.098 | 19.000 | 0.415 | 0.476 | 6.112 |
| -0.735 | 0.472 | 19.000 | 0.536 | 0.476 | 6.112 |
| -0.083 | 0.935 | 19.000 | 0.619 | 0.476 | 6.112 |
| 2.366  | 0.029 | 19.000 | 0.328 | 0.476 | 6.112 |
| -0.346 | 0.733 | 19.000 | 0.367 | 0.476 | 6.112 |
| 2.552  | 0.019 | 19.000 | 1.286 | 0.476 | 6.112 |
| 1.454  | 0.162 | 19.000 | 0.627 | 0.476 | 6.112 |
| 2.281  | 0.034 | 19.000 | 0.890 | 0.476 | 6.112 |
| 1.964  | 0.064 | 19.000 | 1.164 | 0.476 | 6.112 |
| -0.523 | 0.607 | 19.000 | 0.724 | 0.476 | 6.112 |
| -1.986 | 0.062 | 19.000 | 0.535 | 0.476 | 6.112 |
| 0.335  | 0.741 | 19.000 | 0.331 | 0.476 | 6.112 |
| -0.337 | 0.740 | 19.000 | 0.381 | 0.476 | 6.112 |
| -2.329 | 0.031 | 19.000 | 0.554 | 0.476 | 6.112 |
| 1.548  | 0.138 | 19.000 | 0.499 | 0.476 | 6.112 |
| -1.494 | 0.151 | 19.000 | 0.795 | 0.476 | 6.112 |
| 1.549  | 0.138 | 19.000 | 0.452 | 0.476 | 6.112 |
| 4.439  | 0.000 | 19.000 | 0.310 | 0.476 | 6.112 |
| 2.806  | 0.011 | 19.000 | 0.534 | 0.476 | 6.112 |
| -1.891 | 0.074 | 19.000 | 0.349 | 0.476 | 6.112 |
| 1.958  | 0.065 | 19.000 | 0.564 | 0.476 | 6.112 |
| 0.774  | 0.449 | 19.000 | 0.411 | 0.476 | 6.112 |
| -1.807 | 0.087 | 19.000 | 0.636 | 0.476 | 6.112 |
| 2.377  | 0.028 | 19.000 | 0.457 | 0.476 | 6.112 |
| 2.341  | 0.030 | 19.000 | 0.220 | 0.476 | 6.112 |
| -1.649 | 0.116 | 19.000 | 0.415 | 0.476 | 6.112 |

|        |       |        |       |       |       |
|--------|-------|--------|-------|-------|-------|
| 1.444  | 0.165 | 19.000 | 0.605 | 0.476 | 6.112 |
| 0.179  | 0.860 | 19.000 | 0.501 | 0.476 | 6.112 |
| 2.192  | 0.041 | 19.000 | 0.565 | 0.476 | 6.112 |
| 1.079  | 0.294 | 19.000 | 0.445 | 0.476 | 6.112 |
| 1.715  | 0.103 | 19.000 | 0.666 | 0.476 | 6.112 |
| 1.906  | 0.072 | 19.000 | 0.498 | 0.476 | 6.112 |
| -0.659 | 0.518 | 19.000 | 0.483 | 0.476 | 6.112 |
| 1.567  | 0.134 | 19.000 | 0.793 | 0.476 | 6.112 |
| 2.129  | 0.047 | 19.000 | 0.768 | 0.476 | 6.112 |
| 2.604  | 0.017 | 19.000 | 0.825 | 0.476 | 6.112 |
| 2.571  | 0.019 | 19.000 | 1.077 | 0.476 | 6.112 |
| 1.560  | 0.135 | 19.000 | 0.736 | 0.476 | 6.112 |
| 1.202  | 0.244 | 19.000 | 0.431 | 0.476 | 6.112 |
| -0.620 | 0.543 | 19.000 | 0.575 | 0.476 | 6.112 |
| 3.018  | 0.007 | 19.000 | 0.273 | 0.476 | 6.112 |
| -0.504 | 0.620 | 19.000 | 0.319 | 0.476 | 6.112 |
| 1.784  | 0.090 | 19.000 | 0.386 | 0.476 | 6.112 |
| 2.005  | 0.059 | 19.000 | 0.678 | 0.476 | 6.112 |
| 0.547  | 0.591 | 19.000 | 0.485 | 0.476 | 6.112 |
| 4.244  | 0.000 | 19.000 | 0.621 | 0.476 | 6.112 |
| 1.082  | 0.293 | 19.000 | 0.305 | 0.476 | 6.112 |
| 2.447  | 0.024 | 19.000 | 0.284 | 0.476 | 6.112 |
| -1.894 | 0.073 | 19.000 | 0.420 | 0.476 | 6.112 |
| -1.102 | 0.284 | 19.000 | 0.341 | 0.476 | 6.112 |
| 1.093  | 0.288 | 19.000 | 0.296 | 0.476 | 6.112 |
| 0.525  | 0.605 | 19.000 | 0.293 | 0.476 | 6.112 |
| -2.229 | 0.038 | 19.000 | 0.184 | 0.476 | 6.112 |
| -0.392 | 0.699 | 19.000 | 0.533 | 0.476 | 6.112 |
| -2.142 | 0.045 | 19.000 | 0.348 | 0.476 | 6.112 |
| -0.381 | 0.707 | 19.000 | 0.633 | 0.476 | 6.112 |
| 3.368  | 0.003 | 19.000 | 0.720 | 0.476 | 6.112 |
| -1.330 | 0.199 | 19.000 | 0.436 | 0.476 | 6.112 |
| 1.009  | 0.326 | 19.000 | 0.368 | 0.476 | 6.112 |
| -2.267 | 0.035 | 19.000 | 0.892 | 0.476 | 6.112 |
| -2.043 | 0.055 | 19.000 | 0.515 | 0.476 | 6.112 |
| 0.301  | 0.767 | 19.000 | 0.767 | 0.476 | 6.112 |
| 0.457  | 0.653 | 19.000 | 0.439 | 0.476 | 6.112 |
| -0.580 | 0.569 | 19.000 | 0.391 | 0.476 | 6.112 |
| -0.062 | 0.952 | 19.000 | 0.462 | 0.476 | 6.112 |
| -1.147 | 0.265 | 19.000 | 0.377 | 0.476 | 6.112 |
| -0.641 | 0.529 | 19.000 | 1.044 | 0.476 | 6.112 |
| -2.526 | 0.021 | 19.000 | 0.495 | 0.476 | 6.112 |
| -0.345 | 0.734 | 19.000 | 0.383 | 0.476 | 6.112 |
| -0.055 | 0.957 | 19.000 | 0.471 | 0.476 | 6.112 |
| -1.807 | 0.087 | 19.000 | 0.588 | 0.476 | 6.112 |
| -1.981 | 0.062 | 19.000 | 1.088 | 0.476 | 6.112 |
| 1.168  | 0.257 | 19.000 | 0.735 | 0.476 | 6.112 |
| -1.278 | 0.217 | 19.000 | 0.367 | 0.476 | 6.112 |
| -1.110 | 0.281 | 19.000 | 0.933 | 0.476 | 6.112 |
| -0.524 | 0.606 | 19.000 | 0.430 | 0.476 | 6.112 |

|        |       |        |       |       |       |
|--------|-------|--------|-------|-------|-------|
| -0.438 | 0.666 | 19.000 | 0.690 | 0.476 | 6.112 |
| -0.209 | 0.837 | 19.000 | 0.443 | 0.476 | 6.112 |
| -0.048 | 0.962 | 19.000 | 0.600 | 0.476 | 6.112 |
| -0.732 | 0.473 | 19.000 | 0.489 | 0.476 | 6.112 |
| 0.686  | 0.501 | 19.000 | 0.844 | 0.476 | 6.112 |
| 0.212  | 0.834 | 19.000 | 0.798 | 0.476 | 6.112 |
| -0.179 | 0.860 | 19.000 | 0.574 | 0.476 | 6.112 |
| -0.215 | 0.832 | 19.000 | 0.618 | 0.476 | 6.112 |
| 0.005  | 0.996 | 19.000 | 0.690 | 0.476 | 6.112 |
| 0.585  | 0.566 | 19.000 | 0.757 | 0.476 | 6.112 |
| 1.253  | 0.225 | 19.000 | 0.599 | 0.476 | 6.112 |
| 2.076  | 0.052 | 19.000 | 0.518 | 0.476 | 6.112 |
| 0.198  | 0.845 | 19.000 | 0.595 | 0.476 | 6.112 |
| -0.526 | 0.605 | 19.000 | 0.296 | 0.476 | 6.112 |
| 0.998  | 0.331 | 19.000 | 0.655 | 0.476 | 6.112 |
| 1.116  | 0.278 | 19.000 | 0.707 | 0.476 | 6.112 |
| -0.930 | 0.364 | 19.000 | 0.603 | 0.476 | 6.112 |
| -0.345 | 0.734 | 19.000 | 0.852 | 0.476 | 6.112 |
| -0.094 | 0.926 | 19.000 | 0.626 | 0.476 | 6.112 |
| -0.247 | 0.807 | 19.000 | 0.372 | 0.476 | 6.112 |
| -1.399 | 0.178 | 19.000 | 0.285 | 0.476 | 6.112 |
| 1.453  | 0.163 | 19.000 | 0.641 | 0.476 | 6.112 |
| 1.494  | 0.152 | 19.000 | 0.645 | 0.476 | 6.112 |
| 0.584  | 0.566 | 19.000 | 0.488 | 0.476 | 6.112 |
| 0.815  | 0.425 | 19.000 | 0.722 | 0.476 | 6.112 |
| -0.021 | 0.984 | 19.000 | 0.414 | 0.476 | 6.112 |
| 1.497  | 0.151 | 19.000 | 1.081 | 0.476 | 6.112 |
| -0.986 | 0.336 | 19.000 | 0.546 | 0.476 | 6.112 |
| 1.362  | 0.189 | 19.000 | 0.405 | 0.476 | 6.112 |
| 0.948  | 0.355 | 19.000 | 0.386 | 0.476 | 6.112 |
| -0.565 | 0.579 | 19.000 | 0.582 | 0.476 | 6.112 |
| -1.035 | 0.314 | 19.000 | 0.432 | 0.476 | 6.112 |
| -0.862 | 0.400 | 19.000 | 0.715 | 0.476 | 6.112 |
| 0.436  | 0.668 | 19.000 | 0.615 | 0.476 | 6.112 |
| -0.862 | 0.399 | 19.000 | 0.640 | 0.476 | 6.112 |
| 0.209  | 0.837 | 19.000 | 0.427 | 0.476 | 6.112 |
| -1.054 | 0.305 | 19.000 | 0.464 | 0.476 | 6.112 |
| -1.389 | 0.181 | 19.000 | 0.649 | 0.476 | 6.112 |
| -0.753 | 0.461 | 19.000 | 0.523 | 0.476 | 6.112 |
| 0.794  | 0.437 | 19.000 | 0.554 | 0.476 | 6.112 |
| -0.859 | 0.401 | 19.000 | 0.872 | 0.476 | 6.112 |
| 0.609  | 0.550 | 19.000 | 0.461 | 0.476 | 6.112 |
| -0.137 | 0.892 | 19.000 | 0.568 | 0.476 | 6.112 |
| 0.012  | 0.991 | 19.000 | 0.906 | 0.476 | 6.112 |
| 0.105  | 0.918 | 19.000 | 0.828 | 0.476 | 6.112 |
| -1.999 | 0.060 | 19.000 | 0.459 | 0.476 | 6.112 |
| 0.099  | 0.922 | 19.000 | 0.590 | 0.476 | 6.112 |
| 1.343  | 0.195 | 19.000 | 0.688 | 0.476 | 6.112 |
| -0.682 | 0.503 | 19.000 | 0.632 | 0.476 | 6.112 |
| -0.184 | 0.856 | 19.000 | 0.533 | 0.476 | 6.112 |

|        |       |        |       |       |       |
|--------|-------|--------|-------|-------|-------|
| -1.445 | 0.165 | 19.000 | 0.466 | 0.476 | 6.112 |
| 1.758  | 0.095 | 19.000 | 0.662 | 0.476 | 6.112 |
| -2.447 | 0.024 | 19.000 | 0.417 | 0.476 | 6.112 |
| -1.456 | 0.162 | 19.000 | 0.689 | 0.476 | 6.112 |
| -0.941 | 0.358 | 19.000 | 0.580 | 0.476 | 6.112 |
| 0.056  | 0.956 | 19.000 | 0.672 | 0.476 | 6.112 |
| -0.509 | 0.617 | 19.000 | 0.525 | 0.476 | 6.112 |
| -0.870 | 0.395 | 19.000 | 0.546 | 0.476 | 6.112 |
| -1.864 | 0.078 | 19.000 | 0.616 | 0.476 | 6.112 |
| 0.645  | 0.527 | 19.000 | 0.550 | 0.476 | 6.112 |
| 2.184  | 0.042 | 19.000 | 0.673 | 0.476 | 6.112 |
| 1.519  | 0.145 | 19.000 | 0.664 | 0.476 | 6.112 |
| -0.647 | 0.525 | 19.000 | 0.711 | 0.476 | 6.112 |
| -0.651 | 0.523 | 19.000 | 0.578 | 0.476 | 6.112 |
| -1.354 | 0.192 | 19.000 | 0.613 | 0.476 | 6.112 |
| -1.336 | 0.197 | 19.000 | 0.459 | 0.476 | 6.112 |
| -1.162 | 0.260 | 19.000 | 0.494 | 0.476 | 6.112 |
| 1.211  | 0.241 | 19.000 | 0.774 | 0.476 | 6.112 |
| 1.075  | 0.296 | 19.000 | 0.507 | 0.476 | 6.112 |
| -0.692 | 0.497 | 19.000 | 0.688 | 0.476 | 6.112 |
| -0.258 | 0.799 | 19.000 | 0.421 | 0.476 | 6.112 |
| -2.017 | 0.058 | 19.000 | 0.385 | 0.476 | 6.112 |
| -2.140 | 0.046 | 19.000 | 0.652 | 0.476 | 6.112 |
| -0.281 | 0.782 | 19.000 | 0.488 | 0.476 | 6.112 |
| -1.343 | 0.195 | 19.000 | 0.452 | 0.476 | 6.112 |
| -1.522 | 0.145 | 19.000 | 0.499 | 0.476 | 6.112 |
| 1.161  | 0.260 | 19.000 | 0.532 | 0.476 | 6.112 |
| -0.063 | 0.950 | 19.000 | 0.574 | 0.476 | 6.112 |
| -0.492 | 0.629 | 19.000 | 0.509 | 0.476 | 6.112 |
| 1.178  | 0.253 | 19.000 | 0.429 | 0.476 | 6.112 |
| 0.766  | 0.453 | 19.000 | 0.851 | 0.476 | 6.112 |
| -0.675 | 0.508 | 19.000 | 0.526 | 0.476 | 6.112 |
| -0.644 | 0.527 | 19.000 | 0.485 | 0.476 | 6.112 |
| 0.305  | 0.763 | 19.000 | 0.600 | 0.476 | 6.112 |
| 0.492  | 0.628 | 19.000 | 0.656 | 0.476 | 6.112 |
| 0.708  | 0.487 | 19.000 | 0.742 | 0.476 | 6.112 |
| 1.448  | 0.164 | 19.000 | 0.398 | 0.476 | 6.112 |
| 0.314  | 0.757 | 19.000 | 0.631 | 0.476 | 6.112 |
| -1.518 | 0.145 | 19.000 | 0.552 | 0.476 | 6.112 |
| -0.179 | 0.860 | 19.000 | 1.498 | 0.476 | 6.112 |
| 0.085  | 0.933 | 19.000 | 1.263 | 0.476 | 6.112 |
| -1.124 | 0.275 | 19.000 | 0.838 | 0.476 | 6.112 |
| 1.243  | 0.229 | 19.000 | 0.396 | 0.476 | 6.112 |
| -2.419 | 0.026 | 19.000 | 0.463 | 0.476 | 6.112 |
| 2.568  | 0.019 | 19.000 | 0.777 | 0.476 | 6.112 |
| -1.642 | 0.117 | 19.000 | 0.550 | 0.476 | 6.112 |
| 1.792  | 0.089 | 19.000 | 0.482 | 0.476 | 6.112 |
| 2.933  | 0.009 | 19.000 | 0.224 | 0.476 | 6.112 |
| 0.253  | 0.803 | 19.000 | 0.267 | 0.476 | 6.112 |
| 1.465  | 0.159 | 19.000 | 0.448 | 0.476 | 6.112 |

|        |       |        |       |       |       |
|--------|-------|--------|-------|-------|-------|
| 0.006  | 0.996 | 19.000 | 0.389 | 0.476 | 6.112 |
| 0.279  | 0.783 | 19.000 | 0.653 | 0.476 | 6.112 |
| -2.170 | 0.043 | 19.000 | 0.855 | 0.476 | 6.112 |
| 0.772  | 0.449 | 19.000 | 0.475 | 0.476 | 6.112 |
| 2.526  | 0.021 | 19.000 | 0.431 | 0.476 | 6.112 |
| -1.882 | 0.075 | 19.000 | 0.376 | 0.476 | 6.112 |
| -3.019 | 0.007 | 19.000 | 0.396 | 0.476 | 6.112 |
| -1.453 | 0.163 | 19.000 | 0.580 | 0.476 | 6.112 |
| -0.027 | 0.979 | 19.000 | 0.401 | 0.476 | 6.112 |
| -1.248 | 0.227 | 19.000 | 0.386 | 0.476 | 6.112 |
| 1.984  | 0.062 | 19.000 | 0.775 | 0.476 | 6.112 |
| 0.208  | 0.838 | 19.000 | 0.545 | 0.476 | 6.112 |
| 2.239  | 0.037 | 19.000 | 0.259 | 0.476 | 6.112 |
| 0.485  | 0.633 | 19.000 | 0.523 | 0.476 | 6.112 |
| 1.096  | 0.287 | 19.000 | 0.366 | 0.476 | 6.112 |
| 2.122  | 0.047 | 19.000 | 0.453 | 0.476 | 6.112 |
| 2.212  | 0.039 | 19.000 | 0.811 | 0.476 | 6.112 |
| 1.803  | 0.087 | 19.000 | 0.858 | 0.476 | 6.112 |
| 0.810  | 0.428 | 19.000 | 0.396 | 0.476 | 6.112 |
| 0.724  | 0.478 | 19.000 | 0.608 | 0.476 | 6.112 |
| 0.439  | 0.665 | 19.000 | 0.280 | 0.476 | 6.112 |
| 0.352  | 0.729 | 19.000 | 0.325 | 0.476 | 6.112 |
| 2.381  | 0.028 | 19.000 | 0.381 | 0.476 | 6.112 |
| -2.675 | 0.015 | 19.000 | 0.441 | 0.476 | 6.112 |
| -1.767 | 0.093 | 19.000 | 0.493 | 0.476 | 6.112 |
| 1.545  | 0.139 | 19.000 | 0.379 | 0.476 | 6.112 |
| -0.972 | 0.343 | 19.000 | 0.603 | 0.476 | 6.112 |
| -0.037 | 0.971 | 19.000 | 0.582 | 0.476 | 6.112 |
| -2.263 | 0.036 | 19.000 | 0.521 | 0.476 | 6.112 |
| -0.847 | 0.407 | 19.000 | 0.434 | 0.476 | 6.112 |
| 0.964  | 0.347 | 19.000 | 0.296 | 0.476 | 6.112 |
| 1.786  | 0.090 | 19.000 | 0.506 | 0.476 | 6.112 |
| -0.790 | 0.440 | 19.000 | 0.461 | 0.476 | 6.112 |
| 2.167  | 0.043 | 19.000 | 0.333 | 0.476 | 6.112 |
| 1.087  | 0.291 | 19.000 | 0.283 | 0.476 | 6.112 |
| 2.335  | 0.031 | 19.000 | 0.392 | 0.476 | 6.112 |
| 1.742  | 0.098 | 19.000 | 0.248 | 0.476 | 6.112 |
| -2.448 | 0.024 | 19.000 | 0.358 | 0.476 | 6.112 |
| 1.968  | 0.064 | 19.000 | 0.377 | 0.476 | 6.112 |
| 2.269  | 0.035 | 19.000 | 0.305 | 0.476 | 6.112 |
| 0.759  | 0.457 | 19.000 | 0.364 | 0.476 | 6.112 |
| -2.327 | 0.031 | 19.000 | 0.315 | 0.476 | 6.112 |
| -0.092 | 0.928 | 19.000 | 0.765 | 0.476 | 6.112 |
| 1.331  | 0.199 | 19.000 | 0.847 | 0.476 | 6.112 |
| -1.145 | 0.266 | 19.000 | 0.699 | 0.476 | 6.112 |
| -0.658 | 0.519 | 19.000 | 0.836 | 0.476 | 6.112 |
| -1.320 | 0.203 | 19.000 | 0.768 | 0.476 | 6.112 |
| 0.349  | 0.731 | 19.000 | 0.557 | 0.476 | 6.112 |
| -0.769 | 0.451 | 19.000 | 0.369 | 0.476 | 6.112 |
| -0.798 | 0.435 | 19.000 | 0.435 | 0.476 | 6.112 |



|        |       |        |       |       |       |
|--------|-------|--------|-------|-------|-------|
| 1.527  | 0.143 | 19.000 | 0.578 | 0.476 | 6.112 |
| 0.846  | 0.408 | 19.000 | 0.466 | 0.476 | 6.112 |
| 0.180  | 0.859 | 19.000 | 0.400 | 0.476 | 6.112 |
| 0.142  | 0.888 | 19.000 | 0.680 | 0.476 | 6.112 |
| 0.495  | 0.626 | 19.000 | 0.545 | 0.476 | 6.112 |
| -0.879 | 0.390 | 19.000 | 0.623 | 0.476 | 6.112 |
| 0.362  | 0.722 | 19.000 | 0.364 | 0.476 | 6.112 |
| -0.152 | 0.881 | 19.000 | 0.512 | 0.476 | 6.112 |
| 0.331  | 0.745 | 19.000 | 0.462 | 0.476 | 6.112 |
| -0.644 | 0.527 | 19.000 | 0.406 | 0.476 | 6.112 |
| -1.071 | 0.298 | 19.000 | 0.496 | 0.476 | 6.112 |
| 1.373  | 0.186 | 19.000 | 0.549 | 0.476 | 6.112 |
| 0.932  | 0.363 | 19.000 | 0.776 | 0.476 | 6.112 |
| -0.960 | 0.349 | 19.000 | 0.535 | 0.476 | 6.112 |
| 0.500  | 0.623 | 19.000 | 1.101 | 0.476 | 6.112 |
| -1.655 | 0.114 | 19.000 | 0.475 | 0.476 | 6.112 |
| 0.089  | 0.930 | 19.000 | 0.637 | 0.476 | 6.112 |
| -1.739 | 0.098 | 19.000 | 0.453 | 0.476 | 6.112 |
| 0.019  | 0.985 | 19.000 | 0.694 | 0.476 | 6.112 |
| -1.837 | 0.082 | 19.000 | 0.400 | 0.476 | 6.112 |
| 0.383  | 0.706 | 19.000 | 0.486 | 0.476 | 6.112 |
| 0.432  | 0.671 | 19.000 | 0.708 | 0.476 | 6.112 |
| -1.079 | 0.294 | 19.000 | 0.471 | 0.476 | 6.112 |
| 0.505  | 0.620 | 19.000 | 0.677 | 0.476 | 6.112 |
| -1.513 | 0.147 | 19.000 | 0.507 | 0.476 | 6.112 |
| -1.405 | 0.176 | 19.000 | 0.467 | 0.476 | 6.112 |
| -1.453 | 0.163 | 19.000 | 0.397 | 0.476 | 6.112 |
| -2.124 | 0.047 | 19.000 | 0.580 | 0.476 | 6.112 |
| -0.572 | 0.574 | 19.000 | 0.463 | 0.476 | 6.112 |
| -0.885 | 0.387 | 19.000 | 0.599 | 0.476 | 6.112 |
| -1.099 | 0.286 | 19.000 | 0.536 | 0.476 | 6.112 |
| -1.103 | 0.284 | 19.000 | 0.545 | 0.476 | 6.112 |
| 0.416  | 0.682 | 19.000 | 0.468 | 0.476 | 6.112 |
| 0.447  | 0.660 | 19.000 | 0.561 | 0.476 | 6.112 |
| -0.589 | 0.563 | 19.000 | 0.733 | 0.476 | 6.112 |
| -1.811 | 0.086 | 19.000 | 0.481 | 0.476 | 6.112 |
| -0.038 | 0.970 | 19.000 | 0.492 | 0.476 | 6.112 |
| 1.194  | 0.247 | 19.000 | 0.604 | 0.476 | 6.112 |
| -1.080 | 0.294 | 19.000 | 0.283 | 0.476 | 6.112 |
| -0.661 | 0.517 | 19.000 | 0.757 | 0.476 | 6.112 |
| -0.737 | 0.470 | 19.000 | 0.937 | 0.476 | 6.112 |
| -1.787 | 0.090 | 19.000 | 0.856 | 0.476 | 6.112 |
| 0.113  | 0.911 | 19.000 | 0.654 | 0.476 | 6.112 |
| -0.417 | 0.681 | 19.000 | 1.224 | 0.476 | 6.112 |
| -0.753 | 0.461 | 19.000 | 0.859 | 0.476 | 6.112 |
| -0.803 | 0.432 | 19.000 | 0.431 | 0.476 | 6.112 |
| 0.761  | 0.456 | 19.000 | 0.790 | 0.476 | 6.112 |
| 3.708  | 0.001 | 19.000 | 0.502 | 0.476 | 6.112 |
| -0.688 | 0.500 | 19.000 | 0.510 | 0.476 | 6.112 |
| 0.404  | 0.691 | 19.000 | 0.748 | 0.476 | 6.112 |

|        |       |        |       |       |       |
|--------|-------|--------|-------|-------|-------|
| 0.052  | 0.959 | 19.000 | 0.777 | 0.476 | 6.112 |
| -2.126 | 0.047 | 19.000 | 1.373 | 0.476 | 6.112 |
| -0.537 | 0.598 | 19.000 | 0.659 | 0.476 | 6.112 |
| -2.084 | 0.051 | 19.000 | 0.320 | 0.476 | 6.112 |
| -0.813 | 0.426 | 19.000 | 0.858 | 0.476 | 6.112 |
| -0.131 | 0.897 | 19.000 | 0.846 | 0.476 | 6.112 |
| 0.721  | 0.480 | 19.000 | 0.729 | 0.476 | 6.112 |
| -1.157 | 0.261 | 19.000 | 0.641 | 0.476 | 6.112 |
| -1.195 | 0.247 | 19.000 | 0.528 | 0.476 | 6.112 |
| -0.069 | 0.945 | 19.000 | 0.408 | 0.476 | 6.112 |
| -0.586 | 0.565 | 19.000 | 0.471 | 0.476 | 6.112 |
| -0.794 | 0.437 | 19.000 | 0.433 | 0.476 | 6.112 |
| 0.686  | 0.501 | 19.000 | 0.497 | 0.476 | 6.112 |
| -1.474 | 0.157 | 19.000 | 0.668 | 0.476 | 6.112 |
| 0.393  | 0.698 | 19.000 | 0.654 | 0.476 | 6.112 |
| -0.993 | 0.333 | 19.000 | 0.428 | 0.476 | 6.112 |
| -2.341 | 0.030 | 19.000 | 0.621 | 0.476 | 6.112 |
| -1.037 | 0.313 | 19.000 | 0.510 | 0.476 | 6.112 |
| 1.659  | 0.114 | 19.000 | 0.599 | 0.476 | 6.112 |
| -1.866 | 0.077 | 19.000 | 0.814 | 0.476 | 6.112 |
| 0.995  | 0.332 | 19.000 | 0.482 | 0.476 | 6.112 |
| -0.105 | 0.918 | 19.000 | 0.770 | 0.476 | 6.112 |
| 0.270  | 0.790 | 19.000 | 0.848 | 0.476 | 6.112 |
| -1.355 | 0.191 | 19.000 | 0.380 | 0.476 | 6.112 |
| -1.022 | 0.320 | 19.000 | 0.425 | 0.476 | 6.112 |
| -1.485 | 0.154 | 19.000 | 0.500 | 0.476 | 6.112 |
| -0.496 | 0.625 | 19.000 | 0.766 | 0.476 | 6.112 |
| -2.079 | 0.051 | 19.000 | 0.776 | 0.476 | 6.112 |
| -1.089 | 0.290 | 19.000 | 0.479 | 0.476 | 6.112 |
| -0.666 | 0.514 | 19.000 | 0.756 | 0.476 | 6.112 |
| 0.096  | 0.925 | 19.000 | 0.594 | 0.476 | 6.112 |
| -0.693 | 0.497 | 19.000 | 0.767 | 0.476 | 6.112 |
| -1.332 | 0.199 | 19.000 | 0.692 | 0.476 | 6.112 |
| -0.543 | 0.593 | 19.000 | 0.460 | 0.476 | 6.112 |
| 2.186  | 0.042 | 19.000 | 0.635 | 0.476 | 6.112 |
| 0.312  | 0.759 | 19.000 | 0.511 | 0.476 | 6.112 |
| -0.826 | 0.419 | 19.000 | 0.502 | 0.476 | 6.112 |
| 2.524  | 0.021 | 19.000 | 0.600 | 0.476 | 6.112 |
| 2.499  | 0.022 | 19.000 | 0.543 | 0.476 | 6.112 |
| 2.588  | 0.018 | 19.000 | 0.551 | 0.476 | 6.112 |
| -1.878 | 0.076 | 19.000 | 0.910 | 0.476 | 6.112 |
| -1.871 | 0.077 | 19.000 | 0.582 | 0.476 | 6.112 |
| 0.474  | 0.641 | 19.000 | 0.607 | 0.476 | 6.112 |
| 0.148  | 0.884 | 19.000 | 0.557 | 0.476 | 6.112 |
| 2.219  | 0.039 | 19.000 | 0.801 | 0.476 | 6.112 |
| 0.166  | 0.870 | 19.000 | 0.413 | 0.476 | 6.112 |
| -1.238 | 0.231 | 19.000 | 0.401 | 0.476 | 6.112 |
| 0.550  | 0.589 | 19.000 | 0.615 | 0.476 | 6.112 |
| -1.495 | 0.151 | 19.000 | 0.623 | 0.476 | 6.112 |
| -0.468 | 0.645 | 19.000 | 0.394 | 0.476 | 6.112 |

|        |       |        |       |       |       |
|--------|-------|--------|-------|-------|-------|
| 0.170  | 0.867 | 19.000 | 0.637 | 0.476 | 6.112 |
| 0.198  | 0.845 | 19.000 | 0.633 | 0.476 | 6.112 |
| 0.521  | 0.608 | 19.000 | 0.840 | 0.476 | 6.112 |
| -2.251 | 0.036 | 19.000 | 0.621 | 0.476 | 6.112 |
| -0.526 | 0.605 | 19.000 | 0.655 | 0.476 | 6.112 |
| -0.678 | 0.506 | 19.000 | 0.448 | 0.476 | 6.112 |
| -0.162 | 0.873 | 19.000 | 0.577 | 0.476 | 6.112 |
| -0.483 | 0.634 | 19.000 | 0.466 | 0.476 | 6.112 |
| 1.593  | 0.128 | 19.000 | 0.787 | 0.476 | 6.112 |
| 0.003  | 0.998 | 19.000 | 0.419 | 0.476 | 6.112 |
| 1.670  | 0.111 | 19.000 | 0.600 | 0.476 | 6.112 |
| 0.693  | 0.497 | 19.000 | 0.451 | 0.476 | 6.112 |
| 0.027  | 0.979 | 19.000 | 0.596 | 0.476 | 6.112 |
| -0.574 | 0.573 | 19.000 | 0.757 | 0.476 | 6.112 |
| 1.073  | 0.297 | 19.000 | 0.668 | 0.476 | 6.112 |
| 2.285  | 0.034 | 19.000 | 0.783 | 0.476 | 6.112 |
| 2.104  | 0.049 | 19.000 | 0.829 | 0.476 | 6.112 |
| -0.429 | 0.673 | 19.000 | 0.497 | 0.476 | 6.112 |
| 0.726  | 0.477 | 19.000 | 0.441 | 0.476 | 6.112 |
| 0.351  | 0.730 | 19.000 | 0.646 | 0.476 | 6.112 |
| -0.128 | 0.899 | 19.000 | 0.332 | 0.476 | 6.112 |
| -0.103 | 0.919 | 19.000 | 0.502 | 0.476 | 6.112 |
| 0.478  | 0.638 | 19.000 | 0.555 | 0.476 | 6.112 |
| -0.016 | 0.987 | 19.000 | 0.527 | 0.476 | 6.112 |
| -0.740 | 0.469 | 19.000 | 0.616 | 0.476 | 6.112 |
| -0.284 | 0.779 | 19.000 | 0.588 | 0.476 | 6.112 |
| -2.044 | 0.055 | 19.000 | 0.455 | 0.476 | 6.112 |
| -0.251 | 0.805 | 19.000 | 0.392 | 0.476 | 6.112 |
| 0.496  | 0.625 | 19.000 | 0.507 | 0.476 | 6.112 |
| -2.818 | 0.011 | 19.000 | 1.325 | 0.476 | 6.112 |
| 3.634  | 0.002 | 19.000 | 0.403 | 0.476 | 6.112 |
| -0.441 | 0.664 | 19.000 | 0.697 | 0.476 | 6.112 |
| -0.367 | 0.717 | 19.000 | 0.689 | 0.476 | 6.112 |
| -1.381 | 0.183 | 19.000 | 0.800 | 0.476 | 6.112 |
| -0.314 | 0.757 | 19.000 | 0.440 | 0.476 | 6.112 |
| -0.554 | 0.586 | 19.000 | 0.541 | 0.476 | 6.112 |
| -0.891 | 0.384 | 19.000 | 0.600 | 0.476 | 6.112 |
| -0.731 | 0.474 | 19.000 | 0.510 | 0.476 | 6.112 |
| -0.819 | 0.423 | 19.000 | 1.063 | 0.476 | 6.112 |
| -2.917 | 0.009 | 19.000 | 0.858 | 0.476 | 6.112 |
| 0.287  | 0.777 | 19.000 | 0.813 | 0.476 | 6.112 |
| 0.578  | 0.570 | 19.000 | 0.552 | 0.476 | 6.112 |
| -0.593 | 0.560 | 19.000 | 0.832 | 0.476 | 6.112 |
| -1.365 | 0.188 | 19.000 | 0.476 | 0.476 | 6.112 |
| -1.321 | 0.202 | 19.000 | 0.722 | 0.476 | 6.112 |
| 2.057  | 0.054 | 19.000 | 0.363 | 0.476 | 6.112 |
| 0.271  | 0.789 | 19.000 | 0.481 | 0.476 | 6.112 |
| -0.617 | 0.545 | 19.000 | 0.650 | 0.476 | 6.112 |
| -1.982 | 0.062 | 19.000 | 0.603 | 0.476 | 6.112 |
| -0.306 | 0.763 | 19.000 | 0.570 | 0.476 | 6.112 |

|        |       |        |       |       |       |
|--------|-------|--------|-------|-------|-------|
| -0.545 | 0.592 | 19.000 | 0.520 | 0.476 | 6.112 |
| -0.862 | 0.399 | 19.000 | 0.488 | 0.476 | 6.112 |
| -0.709 | 0.487 | 19.000 | 0.614 | 0.476 | 6.112 |
| -1.483 | 0.155 | 19.000 | 0.618 | 0.476 | 6.112 |
| -2.676 | 0.015 | 19.000 | 0.513 | 0.476 | 6.112 |
| 0.165  | 0.871 | 19.000 | 0.575 | 0.476 | 6.112 |
| 0.677  | 0.506 | 19.000 | 0.655 | 0.476 | 6.112 |
| -0.724 | 0.478 | 19.000 | 0.510 | 0.476 | 6.112 |
| -1.567 | 0.134 | 19.000 | 0.515 | 0.476 | 6.112 |
| -1.415 | 0.173 | 19.000 | 0.812 | 0.476 | 6.112 |
| 0.088  | 0.931 | 19.000 | 0.861 | 0.476 | 6.112 |
| -1.063 | 0.301 | 19.000 | 0.434 | 0.476 | 6.112 |
| -1.393 | 0.180 | 19.000 | 0.599 | 0.476 | 6.112 |
| -0.445 | 0.661 | 19.000 | 0.703 | 0.476 | 6.112 |
| -0.051 | 0.960 | 19.000 | 0.667 | 0.476 | 6.112 |
| -0.078 | 0.939 | 19.000 | 0.545 | 0.476 | 6.112 |
| -0.274 | 0.787 | 19.000 | 0.619 | 0.476 | 6.112 |
| 0.507  | 0.618 | 19.000 | 0.401 | 0.476 | 6.112 |
| 2.089  | 0.050 | 19.000 | 0.776 | 0.476 | 6.112 |
| -0.276 | 0.785 | 19.000 | 0.565 | 0.476 | 6.112 |
| -0.552 | 0.587 | 19.000 | 0.380 | 0.476 | 6.112 |
| 0.538  | 0.597 | 19.000 | 0.599 | 0.476 | 6.112 |
| -2.069 | 0.052 | 19.000 | 0.574 | 0.476 | 6.112 |
| -0.059 | 0.953 | 19.000 | 0.872 | 0.476 | 6.112 |
| 1.245  | 0.228 | 19.000 | 0.725 | 0.476 | 6.112 |
| -1.106 | 0.282 | 19.000 | 0.839 | 0.476 | 6.112 |
| 0.366  | 0.718 | 19.000 | 0.471 | 0.476 | 6.112 |
| -0.215 | 0.832 | 19.000 | 0.691 | 0.476 | 6.112 |
| -1.213 | 0.240 | 19.000 | 0.609 | 0.476 | 6.112 |
| -2.597 | 0.018 | 19.000 | 0.517 | 0.476 | 6.112 |
| -1.034 | 0.314 | 19.000 | 0.640 | 0.476 | 6.112 |
| -0.838 | 0.412 | 19.000 | 0.657 | 0.476 | 6.112 |
| 1.370  | 0.187 | 19.000 | 0.875 | 0.476 | 6.112 |
| 0.073  | 0.943 | 19.000 | 0.622 | 0.476 | 6.112 |
| 1.051  | 0.307 | 19.000 | 0.917 | 0.476 | 6.112 |
| -1.368 | 0.187 | 19.000 | 0.535 | 0.476 | 6.112 |
| 0.804  | 0.431 | 19.000 | 0.480 | 0.476 | 6.112 |
| -1.130 | 0.273 | 19.000 | 0.871 | 0.476 | 6.112 |
| 1.041  | 0.311 | 19.000 | 0.516 | 0.476 | 6.112 |
| 0.743  | 0.467 | 19.000 | 0.455 | 0.476 | 6.112 |
| -0.538 | 0.597 | 19.000 | 0.606 | 0.476 | 6.112 |
| -0.455 | 0.654 | 19.000 | 0.436 | 0.476 | 6.112 |
| -0.965 | 0.347 | 19.000 | 0.534 | 0.476 | 6.112 |
| -0.140 | 0.890 | 19.000 | 0.588 | 0.476 | 6.112 |
| -2.246 | 0.037 | 19.000 | 0.922 | 0.476 | 6.112 |
| -0.205 | 0.840 | 19.000 | 0.854 | 0.476 | 6.112 |
| -0.711 | 0.486 | 19.000 | 0.576 | 0.476 | 6.112 |
| 2.535  | 0.020 | 19.000 | 0.493 | 0.476 | 6.112 |
| -1.583 | 0.130 | 19.000 | 0.967 | 0.476 | 6.112 |
| -0.428 | 0.674 | 19.000 | 0.969 | 0.476 | 6.112 |

|        |       |        |       |       |       |
|--------|-------|--------|-------|-------|-------|
| 1.297  | 0.210 | 19.000 | 0.427 | 0.476 | 6.112 |
| -1.122 | 0.276 | 19.000 | 0.470 | 0.476 | 6.112 |
| 1.446  | 0.164 | 19.000 | 0.487 | 0.476 | 6.112 |
| 0.650  | 0.524 | 19.000 | 0.517 | 0.476 | 6.112 |
| 1.610  | 0.124 | 19.000 | 0.732 | 0.476 | 6.112 |
| -1.268 | 0.220 | 19.000 | 0.412 | 0.476 | 6.112 |
| 0.270  | 0.790 | 19.000 | 0.510 | 0.476 | 6.112 |
| -0.524 | 0.606 | 19.000 | 0.523 | 0.476 | 6.112 |
| 0.737  | 0.470 | 19.000 | 0.454 | 0.476 | 6.112 |
| 0.592  | 0.561 | 19.000 | 0.491 | 0.476 | 6.112 |
| 0.982  | 0.338 | 19.000 | 0.525 | 0.476 | 6.112 |
| 1.593  | 0.128 | 19.000 | 0.405 | 0.476 | 6.112 |
| -0.685 | 0.501 | 19.000 | 0.431 | 0.476 | 6.112 |
| -0.502 | 0.622 | 19.000 | 0.759 | 0.476 | 6.112 |
| -0.058 | 0.955 | 19.000 | 0.662 | 0.476 | 6.112 |
| 2.326  | 0.031 | 19.000 | 1.413 | 0.476 | 6.112 |
| 1.143  | 0.267 | 19.000 | 0.494 | 0.476 | 6.112 |
| -1.143 | 0.267 | 19.000 | 0.765 | 0.476 | 6.112 |
| -1.737 | 0.099 | 19.000 | 0.861 | 0.476 | 6.112 |
| -1.601 | 0.126 | 19.000 | 0.498 | 0.476 | 6.112 |
| -1.022 | 0.320 | 19.000 | 0.584 | 0.476 | 6.112 |
| 0.523  | 0.607 | 19.000 | 0.514 | 0.476 | 6.112 |
| -0.750 | 0.462 | 19.000 | 0.832 | 0.476 | 6.112 |
| -0.033 | 0.974 | 19.000 | 0.571 | 0.476 | 6.112 |
| -1.573 | 0.132 | 19.000 | 0.621 | 0.476 | 6.112 |
| -1.483 | 0.155 | 19.000 | 0.556 | 0.476 | 6.112 |
| -1.439 | 0.166 | 19.000 | 0.679 | 0.476 | 6.112 |
| -0.682 | 0.504 | 19.000 | 0.584 | 0.476 | 6.112 |
| -0.605 | 0.552 | 19.000 | 0.593 | 0.476 | 6.112 |
| -0.268 | 0.792 | 19.000 | 0.532 | 0.476 | 6.112 |
| -0.456 | 0.654 | 19.000 | 0.471 | 0.476 | 6.112 |
| 0.797  | 0.435 | 19.000 | 0.489 | 0.476 | 6.112 |
| 0.397  | 0.696 | 19.000 | 0.446 | 0.476 | 6.112 |
| 0.545  | 0.592 | 19.000 | 0.693 | 0.476 | 6.112 |
| -1.416 | 0.173 | 19.000 | 0.403 | 0.476 | 6.112 |
| -1.455 | 0.162 | 19.000 | 0.580 | 0.476 | 6.112 |
| -0.474 | 0.641 | 19.000 | 0.767 | 0.476 | 6.112 |
| 1.715  | 0.103 | 19.000 | 0.720 | 0.476 | 6.112 |
| 2.448  | 0.024 | 19.000 | 0.503 | 0.476 | 6.112 |
| 2.083  | 0.051 | 19.000 | 1.012 | 0.476 | 6.112 |
| 2.941  | 0.008 | 19.000 | 0.407 | 0.476 | 6.112 |
| -0.172 | 0.866 | 19.000 | 0.344 | 0.476 | 6.112 |
| 0.267  | 0.792 | 19.000 | 0.965 | 0.476 | 6.112 |
| 0.273  | 0.788 | 19.000 | 0.554 | 0.476 | 6.112 |
| 2.657  | 0.016 | 19.000 | 0.947 | 0.476 | 6.112 |
| 3.119  | 0.006 | 19.000 | 0.860 | 0.476 | 6.112 |
| -2.107 | 0.049 | 19.000 | 0.555 | 0.476 | 6.112 |
| -1.027 | 0.317 | 19.000 | 0.409 | 0.476 | 6.112 |
| 1.850  | 0.080 | 19.000 | 0.317 | 0.476 | 6.112 |
| -1.801 | 0.088 | 19.000 | 0.353 | 0.476 | 6.112 |

|        |       |        |       |       |       |
|--------|-------|--------|-------|-------|-------|
| 1.248  | 0.227 | 19.000 | 0.554 | 0.476 | 6.112 |
| -1.787 | 0.090 | 19.000 | 0.440 | 0.476 | 6.112 |
| -1.841 | 0.081 | 19.000 | 0.569 | 0.476 | 6.112 |
| -1.505 | 0.149 | 19.000 | 0.602 | 0.476 | 6.112 |
| -1.209 | 0.242 | 19.000 | 0.427 | 0.476 | 6.112 |
| 0.424  | 0.676 | 19.000 | 0.511 | 0.476 | 6.112 |
| -1.870 | 0.077 | 19.000 | 0.449 | 0.476 | 6.112 |
| -2.040 | 0.055 | 19.000 | 0.536 | 0.476 | 6.112 |
| -1.798 | 0.088 | 19.000 | 0.406 | 0.476 | 6.112 |
| -0.145 | 0.886 | 19.000 | 0.534 | 0.476 | 6.112 |
| -0.674 | 0.509 | 19.000 | 0.633 | 0.476 | 6.112 |
| -2.701 | 0.014 | 19.000 | 0.732 | 0.476 | 6.112 |
| 0.135  | 0.894 | 19.000 | 0.921 | 0.476 | 6.112 |
| -2.313 | 0.032 | 19.000 | 1.141 | 0.476 | 6.112 |
| -1.423 | 0.171 | 19.000 | 0.818 | 0.476 | 6.112 |
| -0.467 | 0.646 | 19.000 | 0.361 | 0.476 | 6.112 |
| -0.809 | 0.428 | 19.000 | 0.886 | 0.476 | 6.112 |
| -0.430 | 0.672 | 19.000 | 0.646 | 0.476 | 6.112 |
| -0.289 | 0.776 | 19.000 | 0.432 | 0.476 | 6.112 |
| -1.210 | 0.241 | 19.000 | 0.742 | 0.476 | 6.112 |
| 0.320  | 0.752 | 19.000 | 0.456 | 0.476 | 6.112 |
| 0.826  | 0.419 | 19.000 | 0.650 | 0.476 | 6.112 |
| -1.394 | 0.179 | 19.000 | 0.539 | 0.476 | 6.112 |
| 0.176  | 0.862 | 19.000 | 0.558 | 0.476 | 6.112 |
| 0.637  | 0.532 | 19.000 | 0.471 | 0.476 | 6.112 |
| -2.341 | 0.030 | 19.000 | 0.449 | 0.476 | 6.112 |
| -1.792 | 0.089 | 19.000 | 0.473 | 0.476 | 6.112 |
| -0.806 | 0.430 | 19.000 | 0.399 | 0.476 | 6.112 |
| 0.934  | 0.362 | 19.000 | 0.430 | 0.476 | 6.112 |
| -0.139 | 0.891 | 19.000 | 0.568 | 0.476 | 6.112 |
| 0.109  | 0.915 | 19.000 | 0.556 | 0.476 | 6.112 |
| -1.264 | 0.221 | 19.000 | 0.870 | 0.476 | 6.112 |
| -0.081 | 0.936 | 19.000 | 0.384 | 0.476 | 6.112 |
| 1.663  | 0.113 | 19.000 | 0.366 | 0.476 | 6.112 |
| -1.053 | 0.305 | 19.000 | 0.680 | 0.476 | 6.112 |
| 1.706  | 0.104 | 19.000 | 0.915 | 0.476 | 6.112 |
| -2.915 | 0.009 | 19.000 | 0.636 | 0.476 | 6.112 |
| -0.603 | 0.554 | 19.000 | 0.413 | 0.476 | 6.112 |
| -1.430 | 0.169 | 19.000 | 0.562 | 0.476 | 6.112 |
| 2.262  | 0.036 | 19.000 | 0.472 | 0.476 | 6.112 |
| 0.940  | 0.359 | 19.000 | 0.433 | 0.476 | 6.112 |
| -2.200 | 0.040 | 19.000 | 0.736 | 0.476 | 6.112 |
| 1.234  | 0.232 | 19.000 | 0.347 | 0.476 | 6.112 |
| -1.036 | 0.313 | 19.000 | 0.388 | 0.476 | 6.112 |
| -1.338 | 0.197 | 19.000 | 0.762 | 0.476 | 6.112 |
| -0.602 | 0.554 | 19.000 | 0.447 | 0.476 | 6.112 |
| 3.208  | 0.005 | 19.000 | 0.755 | 0.476 | 6.112 |
| 1.819  | 0.085 | 19.000 | 0.490 | 0.476 | 6.112 |
| 1.888  | 0.074 | 19.000 | 0.549 | 0.476 | 6.112 |
| 3.169  | 0.005 | 19.000 | 0.697 | 0.476 | 6.112 |

|        |       |        |       |       |       |
|--------|-------|--------|-------|-------|-------|
| -0.887 | 0.386 | 19.000 | 0.542 | 0.476 | 6.112 |
| 0.524  | 0.606 | 19.000 | 0.412 | 0.476 | 6.112 |
| -1.133 | 0.271 | 19.000 | 0.644 | 0.476 | 6.112 |
| 1.931  | 0.069 | 19.000 | 0.542 | 0.476 | 6.112 |
| 3.408  | 0.003 | 19.000 | 0.461 | 0.476 | 6.112 |
| -0.882 | 0.389 | 19.000 | 0.691 | 0.476 | 6.112 |
| 0.232  | 0.819 | 19.000 | 0.490 | 0.476 | 6.112 |
| -1.384 | 0.182 | 19.000 | 0.456 | 0.476 | 6.112 |
| -0.534 | 0.600 | 19.000 | 0.437 | 0.476 | 6.112 |
| -1.571 | 0.133 | 19.000 | 0.414 | 0.476 | 6.112 |
| 3.677  | 0.002 | 19.000 | 0.700 | 0.476 | 6.112 |
| 0.045  | 0.965 | 19.000 | 0.446 | 0.476 | 6.112 |
| -1.465 | 0.159 | 19.000 | 0.445 | 0.476 | 6.112 |
| 0.689  | 0.499 | 19.000 | 0.452 | 0.476 | 6.112 |
| -1.689 | 0.108 | 19.000 | 0.582 | 0.476 | 6.112 |
| 0.918  | 0.370 | 19.000 | 0.509 | 0.476 | 6.112 |
| 3.574  | 0.002 | 19.000 | 0.400 | 0.476 | 6.112 |
| -0.661 | 0.516 | 19.000 | 0.646 | 0.476 | 6.112 |
| 2.280  | 0.034 | 19.000 | 0.623 | 0.476 | 6.112 |
| -1.826 | 0.084 | 19.000 | 0.443 | 0.476 | 6.112 |
| 0.654  | 0.521 | 19.000 | 0.425 | 0.476 | 6.112 |
| 0.620  | 0.543 | 19.000 | 0.493 | 0.476 | 6.112 |
| -1.517 | 0.146 | 19.000 | 1.023 | 0.476 | 6.112 |
| -0.678 | 0.506 | 19.000 | 0.557 | 0.476 | 6.112 |
| 0.291  | 0.774 | 19.000 | 0.333 | 0.476 | 6.112 |
| -0.065 | 0.949 | 19.000 | 0.466 | 0.476 | 6.112 |
| 0.253  | 0.803 | 19.000 | 0.497 | 0.476 | 6.112 |
| 1.675  | 0.110 | 19.000 | 1.110 | 0.476 | 6.112 |
| -0.643 | 0.528 | 19.000 | 0.476 | 0.476 | 6.112 |
| -0.487 | 0.632 | 19.000 | 0.683 | 0.476 | 6.112 |
| -1.931 | 0.069 | 19.000 | 0.610 | 0.476 | 6.112 |
| -0.038 | 0.970 | 19.000 | 1.002 | 0.476 | 6.112 |
| -1.450 | 0.163 | 19.000 | 0.455 | 0.476 | 6.112 |
| 1.940  | 0.067 | 19.000 | 0.385 | 0.476 | 6.112 |
| -2.155 | 0.044 | 19.000 | 0.660 | 0.476 | 6.112 |
| -0.118 | 0.907 | 19.000 | 0.375 | 0.476 | 6.112 |
| -0.024 | 0.981 | 19.000 | 0.624 | 0.476 | 6.112 |
| -2.438 | 0.025 | 19.000 | 0.657 | 0.476 | 6.112 |
| -0.745 | 0.465 | 19.000 | 0.431 | 0.476 | 6.112 |
| -1.188 | 0.249 | 19.000 | 0.407 | 0.476 | 6.112 |
| -1.561 | 0.135 | 19.000 | 0.691 | 0.476 | 6.112 |
| -3.544 | 0.002 | 19.000 | 0.795 | 0.476 | 6.112 |
| 0.451  | 0.657 | 19.000 | 0.427 | 0.476 | 6.112 |
| 0.639  | 0.530 | 19.000 | 0.523 | 0.476 | 6.112 |
| 1.360  | 0.190 | 19.000 | 0.542 | 0.476 | 6.112 |
| 2.434  | 0.025 | 19.000 | 0.464 | 0.476 | 6.112 |
| 2.530  | 0.020 | 19.000 | 0.655 | 0.476 | 6.112 |
| -0.834 | 0.415 | 19.000 | 0.584 | 0.476 | 6.112 |
| 1.900  | 0.073 | 19.000 | 0.637 | 0.476 | 6.112 |
| -1.088 | 0.290 | 19.000 | 0.505 | 0.476 | 6.112 |

|        |       |        |       |       |       |
|--------|-------|--------|-------|-------|-------|
| 1.432  | 0.168 | 19.000 | 0.515 | 0.476 | 6.112 |
| -1.583 | 0.130 | 19.000 | 0.397 | 0.476 | 6.112 |
| 2.843  | 0.010 | 19.000 | 0.823 | 0.476 | 6.112 |
| -1.603 | 0.126 | 19.000 | 0.831 | 0.476 | 6.112 |
| 1.947  | 0.067 | 19.000 | 0.703 | 0.476 | 6.112 |
| -1.825 | 0.084 | 19.000 | 0.514 | 0.476 | 6.112 |
| 1.905  | 0.072 | 19.000 | 0.536 | 0.476 | 6.112 |
| 2.191  | 0.041 | 19.000 | 0.459 | 0.476 | 6.112 |
| -0.779 | 0.446 | 19.000 | 0.627 | 0.476 | 6.112 |
| 0.078  | 0.939 | 19.000 | 0.537 | 0.476 | 6.112 |
| -1.331 | 0.199 | 19.000 | 1.771 | 0.476 | 6.112 |
| 1.102  | 0.284 | 19.000 | 0.493 | 0.476 | 6.112 |
| 0.286  | 0.778 | 19.000 | 0.465 | 0.476 | 6.112 |
| 1.353  | 0.192 | 19.000 | 0.679 | 0.476 | 6.112 |
| 1.749  | 0.096 | 19.000 | 0.395 | 0.476 | 6.112 |
| -0.319 | 0.753 | 19.000 | 0.625 | 0.476 | 6.112 |
| 2.146  | 0.045 | 19.000 | 0.623 | 0.476 | 6.112 |
| -0.341 | 0.737 | 19.000 | 0.546 | 0.476 | 6.112 |
| 1.712  | 0.103 | 19.000 | 0.502 | 0.476 | 6.112 |
| -0.042 | 0.967 | 19.000 | 0.462 | 0.476 | 6.112 |
| -1.359 | 0.190 | 19.000 | 0.331 | 0.476 | 6.112 |
| 0.405  | 0.690 | 19.000 | 0.491 | 0.476 | 6.112 |
| 0.741  | 0.468 | 19.000 | 0.554 | 0.476 | 6.112 |
| 1.298  | 0.210 | 19.000 | 0.392 | 0.476 | 6.112 |
| -0.862 | 0.399 | 19.000 | 0.749 | 0.476 | 6.112 |
| 2.822  | 0.011 | 19.000 | 0.553 | 0.476 | 6.112 |
| -2.335 | 0.031 | 19.000 | 0.668 | 0.476 | 6.112 |
| 1.386  | 0.182 | 19.000 | 0.465 | 0.476 | 6.112 |
| -1.386 | 0.182 | 19.000 | 0.604 | 0.476 | 6.112 |
| 0.170  | 0.867 | 19.000 | 0.542 | 0.476 | 6.112 |
| -1.833 | 0.083 | 19.000 | 0.736 | 0.476 | 6.112 |
| -1.510 | 0.147 | 19.000 | 0.532 | 0.476 | 6.112 |
| 0.711  | 0.485 | 19.000 | 0.535 | 0.476 | 6.112 |
| -1.795 | 0.089 | 19.000 | 0.465 | 0.476 | 6.112 |
| -1.631 | 0.119 | 19.000 | 0.542 | 0.476 | 6.112 |
| -0.850 | 0.406 | 19.000 | 0.449 | 0.476 | 6.112 |
| 2.247  | 0.037 | 19.000 | 0.823 | 0.476 | 6.112 |
| 2.002  | 0.060 | 19.000 | 0.552 | 0.476 | 6.112 |
| 1.577  | 0.131 | 19.000 | 0.480 | 0.476 | 6.112 |
| 1.437  | 0.167 | 19.000 | 0.363 | 0.476 | 6.112 |
| -2.160 | 0.044 | 19.000 | 0.474 | 0.476 | 6.112 |
| -0.898 | 0.381 | 19.000 | 0.760 | 0.476 | 6.112 |
| -0.424 | 0.676 | 19.000 | 0.523 | 0.476 | 6.112 |
| 1.171  | 0.256 | 19.000 | 0.420 | 0.476 | 6.112 |
| -0.916 | 0.371 | 19.000 | 0.342 | 0.476 | 6.112 |
| 0.935  | 0.361 | 19.000 | 0.401 | 0.476 | 6.112 |
| -0.776 | 0.447 | 19.000 | 0.469 | 0.476 | 6.112 |
| 1.206  | 0.243 | 19.000 | 0.821 | 0.476 | 6.112 |
| 1.173  | 0.255 | 19.000 | 0.791 | 0.476 | 6.112 |
| 1.089  | 0.290 | 19.000 | 0.898 | 0.476 | 6.112 |



|        |       |        |       |       |       |
|--------|-------|--------|-------|-------|-------|
| 2.287  | 0.034 | 19.000 | 0.496 | 0.476 | 6.112 |
| -1.403 | 0.177 | 19.000 | 0.431 | 0.476 | 6.112 |
| 0.096  | 0.925 | 19.000 | 0.451 | 0.476 | 6.112 |
| -0.694 | 0.496 | 19.000 | 0.419 | 0.476 | 6.112 |
| 1.673  | 0.111 | 19.000 | 0.524 | 0.476 | 6.112 |
| 0.488  | 0.631 | 19.000 | 0.410 | 0.476 | 6.112 |
| 4.202  | 0.000 | 19.000 | 0.347 | 0.476 | 6.112 |
| 2.982  | 0.008 | 19.000 | 0.515 | 0.476 | 6.112 |
| 2.291  | 0.034 | 19.000 | 0.710 | 0.476 | 6.112 |
| 1.533  | 0.142 | 19.000 | 0.741 | 0.476 | 6.112 |
| 1.682  | 0.109 | 19.000 | 0.510 | 0.476 | 6.112 |
| -0.249 | 0.806 | 19.000 | 0.477 | 0.476 | 6.112 |
| 0.523  | 0.607 | 19.000 | 0.510 | 0.476 | 6.112 |
| 0.038  | 0.970 | 19.000 | 0.371 | 0.476 | 6.112 |
| -0.532 | 0.601 | 19.000 | 1.234 | 0.476 | 6.112 |
| -2.213 | 0.039 | 19.000 | 0.552 | 0.476 | 6.112 |
| 0.024  | 0.981 | 19.000 | 0.709 | 0.476 | 6.112 |
| -1.306 | 0.207 | 19.000 | 0.423 | 0.476 | 6.112 |
| -0.093 | 0.927 | 19.000 | 0.892 | 0.476 | 6.112 |
| -1.430 | 0.169 | 19.000 | 0.487 | 0.476 | 6.112 |
| -0.198 | 0.845 | 19.000 | 0.384 | 0.476 | 6.112 |
| -0.154 | 0.879 | 19.000 | 0.463 | 0.476 | 6.112 |
| 0.321  | 0.751 | 19.000 | 0.384 | 0.476 | 6.112 |
| -3.180 | 0.005 | 19.000 | 0.368 | 0.476 | 6.112 |
| -1.535 | 0.141 | 19.000 | 0.750 | 0.476 | 6.112 |
| 1.769  | 0.093 | 19.000 | 0.358 | 0.476 | 6.112 |
| -1.497 | 0.151 | 19.000 | 0.959 | 0.476 | 6.112 |
| 1.516  | 0.146 | 19.000 | 0.455 | 0.476 | 6.112 |
| 0.033  | 0.974 | 19.000 | 0.541 | 0.476 | 6.112 |
| 1.173  | 0.255 | 19.000 | 0.493 | 0.476 | 6.112 |
| -2.112 | 0.048 | 19.000 | 0.484 | 0.476 | 6.112 |
| 0.858  | 0.402 | 19.000 | 0.596 | 0.476 | 6.112 |
| -1.860 | 0.078 | 19.000 | 0.327 | 0.476 | 6.112 |
| -2.727 | 0.013 | 19.000 | 0.555 | 0.476 | 6.112 |
| 1.631  | 0.119 | 19.000 | 0.340 | 0.476 | 6.112 |
| 0.553  | 0.587 | 19.000 | 0.394 | 0.476 | 6.112 |
| 2.496  | 0.022 | 19.000 | 0.432 | 0.476 | 6.112 |
| -2.111 | 0.048 | 19.000 | 0.673 | 0.476 | 6.112 |
| 0.402  | 0.692 | 19.000 | 0.469 | 0.476 | 6.112 |
| 0.097  | 0.924 | 19.000 | 0.428 | 0.476 | 6.112 |
| -1.021 | 0.320 | 19.000 | 0.705 | 0.476 | 6.112 |
| -0.603 | 0.554 | 19.000 | 0.441 | 0.476 | 6.112 |
| -2.283 | 0.034 | 19.000 | 0.455 | 0.476 | 6.112 |
| 0.661  | 0.517 | 19.000 | 0.559 | 0.476 | 6.112 |
| -1.568 | 0.133 | 19.000 | 0.434 | 0.476 | 6.112 |
| 0.479  | 0.637 | 19.000 | 0.373 | 0.476 | 6.112 |
| 0.867  | 0.397 | 19.000 | 0.380 | 0.476 | 6.112 |
| -0.119 | 0.906 | 19.000 | 0.665 | 0.476 | 6.112 |
| -0.949 | 0.354 | 19.000 | 0.805 | 0.476 | 6.112 |
| -1.561 | 0.135 | 19.000 | 0.393 | 0.476 | 6.112 |

|        |       |        |       |       |       |
|--------|-------|--------|-------|-------|-------|
| 2.021  | 0.058 | 19.000 | 0.524 | 0.476 | 6.112 |
| -1.662 | 0.113 | 19.000 | 0.572 | 0.476 | 6.112 |
| 1.388  | 0.181 | 19.000 | 0.705 | 0.476 | 6.112 |
| -1.094 | 0.288 | 19.000 | 0.835 | 0.476 | 6.112 |
| 2.136  | 0.046 | 19.000 | 0.372 | 0.476 | 6.112 |
| 1.335  | 0.198 | 19.000 | 0.474 | 0.476 | 6.112 |
| 0.179  | 0.860 | 19.000 | 0.446 | 0.476 | 6.112 |
| -0.369 | 0.716 | 19.000 | 0.389 | 0.476 | 6.112 |
| -2.126 | 0.047 | 19.000 | 0.315 | 0.476 | 6.112 |
| 0.939  | 0.360 | 19.000 | 0.414 | 0.476 | 6.112 |
| 2.012  | 0.059 | 19.000 | 0.433 | 0.476 | 6.112 |
| 0.439  | 0.666 | 19.000 | 0.626 | 0.476 | 6.112 |
| -0.839 | 0.412 | 19.000 | 0.552 | 0.476 | 6.112 |
| 2.422  | 0.026 | 19.000 | 0.438 | 0.476 | 6.112 |
| -0.503 | 0.621 | 19.000 | 0.717 | 0.476 | 6.112 |
| 1.900  | 0.073 | 19.000 | 0.772 | 0.476 | 6.112 |
| 3.245  | 0.004 | 19.000 | 0.594 | 0.476 | 6.112 |
| -1.852 | 0.080 | 19.000 | 0.699 | 0.476 | 6.112 |
| 1.724  | 0.101 | 19.000 | 0.471 | 0.476 | 6.112 |
| 2.189  | 0.041 | 19.000 | 0.442 | 0.476 | 6.112 |
| 2.221  | 0.039 | 19.000 | 0.570 | 0.476 | 6.112 |
| -0.146 | 0.885 | 19.000 | 0.478 | 0.476 | 6.112 |
| 2.331  | 0.031 | 19.000 | 0.469 | 0.476 | 6.112 |
| 2.321  | 0.032 | 19.000 | 0.540 | 0.476 | 6.112 |
| 0.602  | 0.554 | 19.000 | 0.930 | 0.476 | 6.112 |
| -0.100 | 0.922 | 19.000 | 0.514 | 0.476 | 6.112 |
| 1.409  | 0.175 | 19.000 | 0.766 | 0.476 | 6.112 |
| -1.997 | 0.060 | 19.000 | 1.003 | 0.476 | 6.112 |
| -1.348 | 0.193 | 19.000 | 0.652 | 0.476 | 6.112 |
| 0.169  | 0.868 | 19.000 | 0.478 | 0.476 | 6.112 |
| 1.299  | 0.209 | 19.000 | 0.577 | 0.476 | 6.112 |
| 1.009  | 0.326 | 19.000 | 0.529 | 0.476 | 6.112 |
| -0.617 | 0.545 | 19.000 | 0.440 | 0.476 | 6.112 |
| 3.177  | 0.005 | 19.000 | 0.521 | 0.476 | 6.112 |
| 0.777  | 0.447 | 19.000 | 0.471 | 0.476 | 6.112 |
| 2.761  | 0.012 | 19.000 | 0.475 | 0.476 | 6.112 |
| -0.980 | 0.340 | 19.000 | 0.399 | 0.476 | 6.112 |
| -2.192 | 0.041 | 19.000 | 1.292 | 0.476 | 6.112 |
| -1.402 | 0.177 | 19.000 | 1.157 | 0.476 | 6.112 |
| -0.460 | 0.651 | 19.000 | 0.561 | 0.476 | 6.112 |
| 0.472  | 0.642 | 19.000 | 0.671 | 0.476 | 6.112 |
| -1.599 | 0.126 | 19.000 | 0.360 | 0.476 | 6.112 |
| -2.916 | 0.009 | 19.000 | 0.367 | 0.476 | 6.112 |
| 1.448  | 0.164 | 19.000 | 0.443 | 0.476 | 6.112 |
| 3.105  | 0.006 | 19.000 | 0.495 | 0.476 | 6.112 |
| -0.960 | 0.349 | 19.000 | 0.453 | 0.476 | 6.112 |
| -1.079 | 0.294 | 19.000 | 0.414 | 0.476 | 6.112 |
| -0.002 | 0.998 | 19.000 | 0.546 | 0.476 | 6.112 |
| 3.126  | 0.006 | 19.000 | 0.673 | 0.476 | 6.112 |
| -1.227 | 0.235 | 19.000 | 0.396 | 0.476 | 6.112 |

|        |       |        |       |       |       |
|--------|-------|--------|-------|-------|-------|
| 0.785  | 0.442 | 19.000 | 0.537 | 0.476 | 6.112 |
| 2.684  | 0.015 | 19.000 | 0.644 | 0.476 | 6.112 |
| 1.689  | 0.108 | 19.000 | 0.708 | 0.476 | 6.112 |
| 1.010  | 0.325 | 19.000 | 0.404 | 0.476 | 6.112 |
| -2.051 | 0.054 | 19.000 | 0.461 | 0.476 | 6.112 |
| -1.680 | 0.109 | 19.000 | 0.742 | 0.476 | 6.112 |
| -0.830 | 0.417 | 19.000 | 0.805 | 0.476 | 6.112 |
| -1.601 | 0.126 | 19.000 | 0.727 | 0.476 | 6.112 |
| -0.544 | 0.593 | 19.000 | 0.498 | 0.476 | 6.112 |
| -1.047 | 0.308 | 19.000 | 0.423 | 0.476 | 6.112 |
| 1.335  | 0.198 | 19.000 | 0.559 | 0.476 | 6.112 |
| 0.141  | 0.890 | 19.000 | 0.587 | 0.476 | 6.112 |
| 1.380  | 0.184 | 19.000 | 0.758 | 0.476 | 6.112 |
| 0.779  | 0.446 | 19.000 | 0.612 | 0.476 | 6.112 |
| 1.169  | 0.257 | 19.000 | 0.713 | 0.476 | 6.112 |
| 1.466  | 0.159 | 19.000 | 0.407 | 0.476 | 6.112 |
| -1.350 | 0.193 | 19.000 | 0.408 | 0.476 | 6.112 |
| -1.961 | 0.065 | 19.000 | 0.613 | 0.476 | 6.112 |
| -0.100 | 0.921 | 19.000 | 0.408 | 0.476 | 6.112 |
| -1.090 | 0.289 | 19.000 | 0.851 | 0.476 | 6.112 |
| 1.768  | 0.093 | 19.000 | 0.452 | 0.476 | 6.112 |
| 0.453  | 0.656 | 19.000 | 0.445 | 0.476 | 6.112 |
| -1.541 | 0.140 | 19.000 | 0.437 | 0.476 | 6.112 |
| -2.044 | 0.055 | 19.000 | 0.607 | 0.476 | 6.112 |
| -0.539 | 0.596 | 19.000 | 0.436 | 0.476 | 6.112 |
| 0.971  | 0.344 | 19.000 | 0.403 | 0.476 | 6.112 |
| 3.076  | 0.006 | 19.000 | 0.300 | 0.476 | 6.112 |
| -1.072 | 0.297 | 19.000 | 0.497 | 0.476 | 6.112 |
| -1.391 | 0.180 | 19.000 | 0.557 | 0.476 | 6.112 |
| -1.204 | 0.243 | 19.000 | 0.409 | 0.476 | 6.112 |
| 0.888  | 0.386 | 19.000 | 0.444 | 0.476 | 6.112 |
| 0.761  | 0.456 | 19.000 | 0.770 | 0.476 | 6.112 |
| -1.908 | 0.072 | 19.000 | 0.595 | 0.476 | 6.112 |
| 1.469  | 0.158 | 19.000 | 0.329 | 0.476 | 6.112 |
| -0.379 | 0.709 | 19.000 | 0.447 | 0.476 | 6.112 |
| 1.245  | 0.228 | 19.000 | 0.516 | 0.476 | 6.112 |
| -0.762 | 0.456 | 19.000 | 0.421 | 0.476 | 6.112 |
| -1.990 | 0.061 | 19.000 | 0.563 | 0.476 | 6.112 |
| -0.096 | 0.925 | 19.000 | 0.650 | 0.476 | 6.112 |
| -0.375 | 0.712 | 19.000 | 0.396 | 0.476 | 6.112 |
| 0.032  | 0.975 | 19.000 | 0.641 | 0.476 | 6.112 |
| -1.318 | 0.203 | 19.000 | 0.617 | 0.476 | 6.112 |
| 1.406  | 0.176 | 19.000 | 0.435 | 0.476 | 6.112 |
| -0.394 | 0.698 | 19.000 | 0.586 | 0.476 | 6.112 |
| -0.287 | 0.777 | 19.000 | 0.485 | 0.476 | 6.112 |
| 2.732  | 0.013 | 19.000 | 0.259 | 0.476 | 6.112 |
| 3.010  | 0.007 | 19.000 | 0.486 | 0.476 | 6.112 |
| 1.602  | 0.126 | 19.000 | 0.401 | 0.476 | 6.112 |
| 3.156  | 0.005 | 19.000 | 0.508 | 0.476 | 6.112 |
| 1.875  | 0.076 | 19.000 | 0.612 | 0.476 | 6.112 |

|        |       |        |       |       |       |
|--------|-------|--------|-------|-------|-------|
| 2.338  | 0.030 | 19.000 | 0.372 | 0.476 | 6.112 |
| 1.912  | 0.071 | 19.000 | 0.480 | 0.476 | 6.112 |
| -1.527 | 0.143 | 19.000 | 0.674 | 0.476 | 6.112 |
| -1.542 | 0.140 | 19.000 | 0.663 | 0.476 | 6.112 |
| -1.839 | 0.082 | 19.000 | 0.347 | 0.476 | 6.112 |
| 1.452  | 0.163 | 19.000 | 0.537 | 0.476 | 6.112 |
| -0.564 | 0.579 | 19.000 | 0.352 | 0.476 | 6.112 |
| -0.494 | 0.627 | 19.000 | 0.409 | 0.476 | 6.112 |
| -0.248 | 0.807 | 19.000 | 0.587 | 0.476 | 6.112 |
| -1.064 | 0.300 | 19.000 | 0.559 | 0.476 | 6.112 |
| -0.538 | 0.597 | 19.000 | 0.407 | 0.476 | 6.112 |
| -1.382 | 0.183 | 19.000 | 0.331 | 0.476 | 6.112 |
| 0.774  | 0.448 | 19.000 | 0.616 | 0.476 | 6.112 |
| 0.345  | 0.734 | 19.000 | 0.444 | 0.476 | 6.112 |
| -1.667 | 0.112 | 19.000 | 0.875 | 0.476 | 6.112 |
| 0.274  | 0.787 | 19.000 | 0.458 | 0.476 | 6.112 |
| -0.062 | 0.951 | 19.000 | 0.536 | 0.476 | 6.112 |
| 0.795  | 0.436 | 19.000 | 0.664 | 0.476 | 6.112 |
| 1.723  | 0.101 | 19.000 | 0.798 | 0.476 | 6.112 |
| -1.169 | 0.257 | 19.000 | 0.511 | 0.476 | 6.112 |
| -0.075 | 0.941 | 19.000 | 0.401 | 0.476 | 6.112 |
| 0.621  | 0.542 | 19.000 | 0.426 | 0.476 | 6.112 |
| 0.300  | 0.768 | 19.000 | 0.479 | 0.476 | 6.112 |
| -1.237 | 0.231 | 19.000 | 0.480 | 0.476 | 6.112 |
| 1.243  | 0.229 | 19.000 | 0.536 | 0.476 | 6.112 |
| 2.292  | 0.033 | 19.000 | 0.615 | 0.476 | 6.112 |
| 2.432  | 0.025 | 19.000 | 0.647 | 0.476 | 6.112 |
| 1.755  | 0.095 | 19.000 | 0.628 | 0.476 | 6.112 |
| 2.686  | 0.015 | 19.000 | 0.632 | 0.476 | 6.112 |
| 2.345  | 0.030 | 19.000 | 1.129 | 0.476 | 6.112 |
| 1.214  | 0.240 | 19.000 | 0.463 | 0.476 | 6.112 |
| -0.661 | 0.517 | 19.000 | 0.656 | 0.476 | 6.112 |
| 0.876  | 0.392 | 19.000 | 0.490 | 0.476 | 6.112 |
| -1.258 | 0.224 | 19.000 | 0.683 | 0.476 | 6.112 |
| 2.297  | 0.033 | 19.000 | 0.955 | 0.476 | 6.112 |
| -0.735 | 0.471 | 19.000 | 0.436 | 0.476 | 6.112 |
| -0.514 | 0.613 | 19.000 | 0.387 | 0.476 | 6.112 |
| -0.583 | 0.567 | 19.000 | 0.711 | 0.476 | 6.112 |
| -1.288 | 0.213 | 19.000 | 0.554 | 0.476 | 6.112 |
| 0.599  | 0.556 | 19.000 | 0.472 | 0.476 | 6.112 |
| 1.643  | 0.117 | 19.000 | 0.455 | 0.476 | 6.112 |
| 0.500  | 0.623 | 19.000 | 0.745 | 0.476 | 6.112 |
| 2.025  | 0.057 | 19.000 | 0.698 | 0.476 | 6.112 |
| 1.038  | 0.313 | 19.000 | 0.571 | 0.476 | 6.112 |
| -1.241 | 0.230 | 19.000 | 0.433 | 0.476 | 6.112 |
| -0.309 | 0.761 | 19.000 | 0.520 | 0.476 | 6.112 |
| -1.365 | 0.188 | 19.000 | 0.457 | 0.476 | 6.112 |
| -1.967 | 0.064 | 19.000 | 0.378 | 0.476 | 6.112 |
| 2.112  | 0.048 | 19.000 | 0.513 | 0.476 | 6.112 |
| 1.329  | 0.200 | 19.000 | 0.448 | 0.476 | 6.112 |

|        |       |        |       |       |       |
|--------|-------|--------|-------|-------|-------|
| 0.532  | 0.601 | 19.000 | 0.491 | 0.476 | 6.112 |
| -1.539 | 0.140 | 19.000 | 0.428 | 0.476 | 6.112 |
| -1.044 | 0.310 | 19.000 | 0.466 | 0.476 | 6.112 |
| -1.668 | 0.112 | 19.000 | 0.413 | 0.476 | 6.112 |
| 2.143  | 0.045 | 19.000 | 0.460 | 0.476 | 6.112 |
| 0.298  | 0.769 | 19.000 | 0.468 | 0.476 | 6.112 |
| -2.253 | 0.036 | 19.000 | 0.441 | 0.476 | 6.112 |
| 0.413  | 0.684 | 19.000 | 0.433 | 0.476 | 6.112 |
| 0.871  | 0.395 | 19.000 | 0.439 | 0.476 | 6.112 |
| -0.385 | 0.704 | 19.000 | 0.544 | 0.476 | 6.112 |
| 2.635  | 0.016 | 19.000 | 0.714 | 0.476 | 6.112 |
| 2.656  | 0.016 | 19.000 | 0.750 | 0.476 | 6.112 |
| -0.949 | 0.354 | 19.000 | 0.463 | 0.476 | 6.112 |
| -1.781 | 0.091 | 19.000 | 0.323 | 0.476 | 6.112 |
| -1.874 | 0.076 | 19.000 | 0.506 | 0.476 | 6.112 |
| -1.668 | 0.112 | 19.000 | 0.973 | 0.476 | 6.112 |
| 0.231  | 0.820 | 19.000 | 0.515 | 0.476 | 6.112 |
| -0.325 | 0.749 | 19.000 | 0.705 | 0.476 | 6.112 |
| -1.870 | 0.077 | 19.000 | 0.413 | 0.476 | 6.112 |
| -1.194 | 0.247 | 19.000 | 0.646 | 0.476 | 6.112 |
| 2.544  | 0.020 | 19.000 | 0.798 | 0.476 | 6.112 |
| 0.275  | 0.786 | 19.000 | 0.681 | 0.476 | 6.112 |
| -1.755 | 0.095 | 19.000 | 0.459 | 0.476 | 6.112 |
| -0.883 | 0.389 | 19.000 | 0.357 | 0.476 | 6.112 |
| 2.334  | 0.031 | 19.000 | 0.482 | 0.476 | 6.112 |
| -0.698 | 0.494 | 19.000 | 0.476 | 0.476 | 6.112 |
| 1.947  | 0.067 | 19.000 | 0.441 | 0.476 | 6.112 |
| -1.334 | 0.198 | 19.000 | 0.435 | 0.476 | 6.112 |
| -1.464 | 0.159 | 19.000 | 0.404 | 0.476 | 6.112 |
| -0.031 | 0.975 | 19.000 | 0.511 | 0.476 | 6.112 |
| -0.370 | 0.716 | 19.000 | 0.474 | 0.476 | 6.112 |
| 0.863  | 0.399 | 19.000 | 0.402 | 0.476 | 6.112 |
| -1.995 | 0.061 | 19.000 | 0.477 | 0.476 | 6.112 |
| 2.212  | 0.039 | 19.000 | 0.575 | 0.476 | 6.112 |
| 0.876  | 0.392 | 19.000 | 0.569 | 0.476 | 6.112 |
| 0.693  | 0.497 | 19.000 | 0.422 | 0.476 | 6.112 |
| -2.907 | 0.009 | 19.000 | 0.436 | 0.476 | 6.112 |
| -0.703 | 0.490 | 19.000 | 0.534 | 0.476 | 6.112 |
| 0.487  | 0.632 | 19.000 | 0.627 | 0.476 | 6.112 |
| -1.869 | 0.077 | 19.000 | 0.440 | 0.476 | 6.112 |
| 1.948  | 0.066 | 19.000 | 0.501 | 0.476 | 6.112 |
| 0.593  | 0.560 | 19.000 | 0.922 | 0.476 | 6.112 |
| -0.134 | 0.895 | 19.000 | 0.439 | 0.476 | 6.112 |
| 1.853  | 0.079 | 19.000 | 0.552 | 0.476 | 6.112 |
| 1.747  | 0.097 | 19.000 | 0.869 | 0.476 | 6.112 |
| -0.210 | 0.836 | 19.000 | 0.413 | 0.476 | 6.112 |
| -1.089 | 0.290 | 19.000 | 0.240 | 0.476 | 6.112 |
| -0.480 | 0.637 | 19.000 | 0.394 | 0.476 | 6.112 |
| -0.145 | 0.886 | 19.000 | 0.374 | 0.476 | 6.112 |
| -0.665 | 0.514 | 19.000 | 0.331 | 0.476 | 6.112 |

|        |       |        |       |       |       |
|--------|-------|--------|-------|-------|-------|
| -1.818 | 0.085 | 19.000 | 0.249 | 0.476 | 6.112 |
| -0.281 | 0.782 | 19.000 | 0.531 | 0.476 | 6.112 |
| -0.817 | 0.424 | 19.000 | 0.539 | 0.476 | 6.112 |
| 1.169  | 0.257 | 19.000 | 0.575 | 0.476 | 6.112 |
| 2.020  | 0.058 | 19.000 | 0.514 | 0.476 | 6.112 |
| 2.777  | 0.012 | 19.000 | 0.714 | 0.476 | 6.112 |
| -1.965 | 0.064 | 19.000 | 0.311 | 0.476 | 6.112 |
| -1.844 | 0.081 | 19.000 | 0.308 | 0.476 | 6.112 |
| -2.952 | 0.008 | 19.000 | 0.258 | 0.476 | 6.112 |
| 2.123  | 0.047 | 19.000 | 0.429 | 0.476 | 6.112 |
| 2.143  | 0.045 | 19.000 | 0.271 | 0.476 | 6.112 |
| 1.228  | 0.234 | 19.000 | 0.411 | 0.476 | 6.112 |
| 3.217  | 0.005 | 19.000 | 0.342 | 0.476 | 6.112 |
| 2.292  | 0.033 | 19.000 | 0.699 | 0.476 | 6.112 |
| -0.541 | 0.595 | 19.000 | 0.546 | 0.476 | 6.112 |
| -0.408 | 0.688 | 19.000 | 0.451 | 0.476 | 6.112 |
| -2.225 | 0.038 | 19.000 | 0.355 | 0.476 | 6.112 |
| -1.321 | 0.202 | 19.000 | 0.553 | 0.476 | 6.112 |
| -0.992 | 0.334 | 19.000 | 0.381 | 0.476 | 6.112 |
| -0.499 | 0.624 | 19.000 | 0.316 | 0.476 | 6.112 |
| -0.817 | 0.424 | 19.000 | 0.434 | 0.476 | 6.112 |
| 1.391  | 0.180 | 19.000 | 0.380 | 0.476 | 6.112 |
| -2.111 | 0.048 | 19.000 | 0.206 | 0.476 | 6.112 |
| -3.657 | 0.002 | 19.000 | 0.259 | 0.476 | 6.112 |
| -2.146 | 0.045 | 19.000 | 0.433 | 0.476 | 6.112 |
| 1.181  | 0.252 | 19.000 | 0.625 | 0.476 | 6.112 |
| 3.199  | 0.005 | 19.000 | 0.227 | 0.476 | 6.112 |
| 0.726  | 0.477 | 19.000 | 0.407 | 0.476 | 6.112 |
| -0.456 | 0.654 | 19.000 | 0.687 | 0.476 | 6.112 |
| -0.990 | 0.335 | 19.000 | 0.450 | 0.476 | 6.112 |
| 0.300  | 0.767 | 19.000 | 0.384 | 0.476 | 6.112 |
| -1.207 | 0.242 | 19.000 | 0.592 | 0.476 | 6.112 |
| 1.121  | 0.276 | 19.000 | 0.333 | 0.476 | 6.112 |
| -0.478 | 0.638 | 19.000 | 0.366 | 0.476 | 6.112 |
| -2.479 | 0.023 | 19.000 | 0.425 | 0.476 | 6.112 |
| -1.803 | 0.087 | 19.000 | 0.320 | 0.476 | 6.112 |
| 2.603  | 0.017 | 19.000 | 0.396 | 0.476 | 6.112 |
| 0.978  | 0.340 | 19.000 | 0.387 | 0.476 | 6.112 |
| 1.668  | 0.112 | 19.000 | 0.460 | 0.476 | 6.112 |
| -0.546 | 0.592 | 19.000 | 0.816 | 0.476 | 6.112 |
| 0.672  | 0.510 | 19.000 | 0.595 | 0.476 | 6.112 |
| -2.360 | 0.029 | 19.000 | 0.346 | 0.476 | 6.112 |
| 0.323  | 0.750 | 19.000 | 0.455 | 0.476 | 6.112 |
| -0.983 | 0.338 | 19.000 | 1.320 | 0.476 | 6.112 |
| 1.357  | 0.191 | 19.000 | 0.519 | 0.476 | 6.112 |
| 0.674  | 0.509 | 19.000 | 0.352 | 0.476 | 6.112 |
| 0.562  | 0.581 | 19.000 | 0.590 | 0.476 | 6.112 |
| 1.569  | 0.133 | 19.000 | 0.342 | 0.476 | 6.112 |
| -0.207 | 0.838 | 19.000 | 0.787 | 0.476 | 6.112 |
| 2.332  | 0.031 | 19.000 | 0.822 | 0.476 | 6.112 |

|        |       |        |       |       |       |
|--------|-------|--------|-------|-------|-------|
| 3.930  | 0.001 | 19.000 | 0.651 | 0.476 | 6.112 |
| 1.357  | 0.191 | 19.000 | 0.330 | 0.476 | 6.112 |
| 2.036  | 0.056 | 19.000 | 0.429 | 0.476 | 6.112 |
| -2.979 | 0.008 | 19.000 | 0.617 | 0.476 | 6.112 |
| 1.433  | 0.168 | 19.000 | 0.633 | 0.476 | 6.112 |
| 2.347  | 0.030 | 19.000 | 0.447 | 0.476 | 6.112 |
| 1.522  | 0.144 | 19.000 | 0.661 | 0.476 | 6.112 |
| 2.164  | 0.043 | 19.000 | 0.249 | 0.476 | 6.112 |
| 0.263  | 0.796 | 19.000 | 0.330 | 0.476 | 6.112 |
| 1.319  | 0.203 | 19.000 | 0.442 | 0.476 | 6.112 |
| 2.248  | 0.037 | 19.000 | 0.925 | 0.476 | 6.112 |
| 1.106  | 0.282 | 19.000 | 0.670 | 0.476 | 6.112 |
| 1.426  | 0.170 | 19.000 | 0.612 | 0.476 | 6.112 |
| -0.858 | 0.402 | 19.000 | 0.465 | 0.476 | 6.112 |
| 1.185  | 0.251 | 19.000 | 0.453 | 0.476 | 6.112 |
| -1.924 | 0.069 | 19.000 | 0.557 | 0.476 | 6.112 |
| 1.637  | 0.118 | 19.000 | 0.386 | 0.476 | 6.112 |
| 2.217  | 0.039 | 19.000 | 0.681 | 0.476 | 6.112 |
| 1.489  | 0.153 | 19.000 | 0.589 | 0.476 | 6.112 |
| -1.005 | 0.327 | 19.000 | 0.585 | 0.476 | 6.112 |
| 2.244  | 0.037 | 19.000 | 0.447 | 0.476 | 6.112 |
| -0.663 | 0.515 | 19.000 | 0.362 | 0.476 | 6.112 |
| 1.864  | 0.078 | 19.000 | 0.381 | 0.476 | 6.112 |
| 1.906  | 0.072 | 19.000 | 0.309 | 0.476 | 6.112 |
| 2.301  | 0.033 | 19.000 | 0.399 | 0.476 | 6.112 |
| 1.375  | 0.185 | 19.000 | 0.620 | 0.476 | 6.112 |
| 3.523  | 0.002 | 19.000 | 1.182 | 0.476 | 6.112 |
| -4.438 | 0.000 | 19.000 | 0.275 | 0.476 | 6.112 |
| 2.373  | 0.028 | 19.000 | 0.894 | 0.476 | 6.112 |
| -1.502 | 0.149 | 19.000 | 0.399 | 0.476 | 6.112 |
| -0.764 | 0.454 | 19.000 | 0.348 | 0.476 | 6.112 |
| -1.459 | 0.161 | 19.000 | 0.408 | 0.476 | 6.112 |
| 0.115  | 0.910 | 19.000 | 0.555 | 0.476 | 6.112 |
| -0.615 | 0.546 | 19.000 | 1.561 | 0.476 | 6.112 |
| -0.388 | 0.703 | 19.000 | 0.433 | 0.476 | 6.112 |
| 1.515  | 0.146 | 19.000 | 0.604 | 0.476 | 6.112 |
| -1.574 | 0.132 | 19.000 | 0.260 | 0.476 | 6.112 |
| 0.340  | 0.738 | 19.000 | 1.112 | 0.476 | 6.112 |
| 0.090  | 0.929 | 19.000 | 1.202 | 0.476 | 6.112 |
| -2.346 | 0.030 | 19.000 | 0.681 | 0.476 | 6.112 |
| -1.492 | 0.152 | 19.000 | 0.439 | 0.476 | 6.112 |
| -2.387 | 0.028 | 19.000 | 0.647 | 0.476 | 6.112 |
| 2.299  | 0.033 | 19.000 | 0.284 | 0.476 | 6.112 |
| 1.158  | 0.261 | 19.000 | 0.350 | 0.476 | 6.112 |
| -4.282 | 0.000 | 19.000 | 0.392 | 0.476 | 6.112 |
| -2.077 | 0.052 | 19.000 | 0.436 | 0.476 | 6.112 |
| -1.315 | 0.204 | 19.000 | 0.517 | 0.476 | 6.112 |
| -2.556 | 0.019 | 19.000 | 0.271 | 0.476 | 6.112 |
| -1.200 | 0.245 | 19.000 | 0.468 | 0.476 | 6.112 |
| 1.714  | 0.103 | 19.000 | 0.342 | 0.476 | 6.112 |

|        |       |        |       |       |       |
|--------|-------|--------|-------|-------|-------|
| 0.338  | 0.739 | 19.000 | 0.395 | 0.476 | 6.112 |
| -2.307 | 0.033 | 19.000 | 0.420 | 0.476 | 6.112 |
| 1.370  | 0.187 | 19.000 | 0.475 | 0.476 | 6.112 |
| -0.508 | 0.618 | 19.000 | 0.326 | 0.476 | 6.112 |
| -0.845 | 0.409 | 19.000 | 0.507 | 0.476 | 6.112 |
| -2.165 | 0.043 | 19.000 | 0.367 | 0.476 | 6.112 |
| -1.808 | 0.086 | 19.000 | 0.514 | 0.476 | 6.112 |
| -0.774 | 0.448 | 19.000 | 0.459 | 0.476 | 6.112 |
| 0.100  | 0.922 | 19.000 | 0.469 | 0.476 | 6.112 |
| -2.042 | 0.055 | 19.000 | 0.387 | 0.476 | 6.112 |
| -1.682 | 0.109 | 19.000 | 0.548 | 0.476 | 6.112 |
| 1.087  | 0.291 | 19.000 | 0.464 | 0.476 | 6.112 |
| 2.512  | 0.021 | 19.000 | 0.381 | 0.476 | 6.112 |
| 2.341  | 0.030 | 19.000 | 0.792 | 0.476 | 6.112 |
| 0.814  | 0.426 | 19.000 | 0.571 | 0.476 | 6.112 |
| 1.544  | 0.139 | 19.000 | 0.650 | 0.476 | 6.112 |
| 1.837  | 0.082 | 19.000 | 0.257 | 0.476 | 6.112 |
| -0.261 | 0.797 | 19.000 | 0.486 | 0.476 | 6.112 |
| -1.803 | 0.087 | 19.000 | 1.173 | 0.476 | 6.112 |
| -1.495 | 0.151 | 19.000 | 0.431 | 0.476 | 6.112 |
| 2.969  | 0.008 | 19.000 | 0.530 | 0.476 | 6.112 |
| 2.048  | 0.055 | 19.000 | 0.309 | 0.476 | 6.112 |
| -2.886 | 0.009 | 19.000 | 0.404 | 0.476 | 6.112 |
| -2.499 | 0.022 | 19.000 | 0.390 | 0.476 | 6.112 |
| 2.070  | 0.052 | 19.000 | 0.526 | 0.476 | 6.112 |
| 1.557  | 0.136 | 19.000 | 0.530 | 0.476 | 6.112 |
| -0.710 | 0.486 | 19.000 | 0.353 | 0.476 | 6.112 |
| -2.210 | 0.040 | 19.000 | 0.453 | 0.476 | 6.112 |
| -0.162 | 0.873 | 19.000 | 0.636 | 0.476 | 6.112 |
| 0.234  | 0.818 | 19.000 | 0.686 | 0.476 | 6.112 |
| -1.637 | 0.118 | 19.000 | 0.394 | 0.476 | 6.112 |
| -0.333 | 0.743 | 19.000 | 0.735 | 0.476 | 6.112 |
| 0.780  | 0.445 | 19.000 | 0.534 | 0.476 | 6.112 |
| 1.114  | 0.279 | 19.000 | 0.465 | 0.476 | 6.112 |
| 0.330  | 0.745 | 19.000 | 0.566 | 0.476 | 6.112 |
| -0.795 | 0.437 | 19.000 | 0.517 | 0.476 | 6.112 |
| 0.509  | 0.617 | 19.000 | 0.674 | 0.476 | 6.112 |
| 0.378  | 0.709 | 19.000 | 1.131 | 0.476 | 6.112 |
| -0.926 | 0.366 | 19.000 | 0.306 | 0.476 | 6.112 |
| -0.992 | 0.334 | 19.000 | 0.425 | 0.476 | 6.112 |
| 0.572  | 0.574 | 19.000 | 0.535 | 0.476 | 6.112 |
| -0.082 | 0.936 | 19.000 | 0.473 | 0.476 | 6.112 |
| -2.602 | 0.017 | 19.000 | 0.392 | 0.476 | 6.112 |
| -2.998 | 0.007 | 19.000 | 0.523 | 0.476 | 6.112 |
| 0.716  | 0.482 | 19.000 | 0.449 | 0.476 | 6.112 |
| 0.666  | 0.513 | 19.000 | 0.727 | 0.476 | 6.112 |
| 1.758  | 0.095 | 19.000 | 0.547 | 0.476 | 6.112 |
| 1.542  | 0.140 | 19.000 | 0.417 | 0.476 | 6.112 |
| -1.106 | 0.282 | 19.000 | 0.760 | 0.476 | 6.112 |
| -1.055 | 0.305 | 19.000 | 0.968 | 0.476 | 6.112 |



|        |       |        |       |       |       |
|--------|-------|--------|-------|-------|-------|
| 2.672  | 0.015 | 19.000 | 0.362 | 0.476 | 6.112 |
| 1.302  | 0.209 | 19.000 | 0.285 | 0.476 | 6.112 |
| -1.187 | 0.250 | 19.000 | 0.629 | 0.476 | 6.112 |
| 2.120  | 0.047 | 19.000 | 1.003 | 0.476 | 6.112 |
| 2.059  | 0.053 | 19.000 | 0.599 | 0.476 | 6.112 |
| 2.450  | 0.024 | 19.000 | 1.158 | 0.476 | 6.112 |
| 2.114  | 0.048 | 19.000 | 0.842 | 0.476 | 6.112 |
| 0.617  | 0.544 | 19.000 | 0.690 | 0.476 | 6.112 |
| 2.231  | 0.038 | 19.000 | 1.062 | 0.476 | 6.112 |
| 1.764  | 0.094 | 19.000 | 0.748 | 0.476 | 6.112 |
| -0.360 | 0.723 | 19.000 | 0.907 | 0.476 | 6.112 |
| 2.057  | 0.054 | 19.000 | 1.183 | 0.476 | 6.112 |
| 1.789  | 0.090 | 19.000 | 1.286 | 0.476 | 6.112 |
| -0.650 | 0.523 | 19.000 | 0.634 | 0.476 | 6.112 |
| -0.467 | 0.646 | 19.000 | 0.440 | 0.476 | 6.112 |
| -1.518 | 0.145 | 19.000 | 0.500 | 0.476 | 6.112 |
| 2.303  | 0.033 | 19.000 | 1.044 | 0.476 | 6.112 |
| 0.984  | 0.338 | 19.000 | 0.410 | 0.476 | 6.112 |
| -0.482 | 0.636 | 19.000 | 0.521 | 0.476 | 6.112 |
| -1.508 | 0.148 | 19.000 | 0.467 | 0.476 | 6.112 |
| -0.196 | 0.847 | 19.000 | 0.722 | 0.476 | 6.112 |
| 2.351  | 0.030 | 19.000 | 0.280 | 0.476 | 6.112 |
| -0.907 | 0.376 | 19.000 | 0.746 | 0.476 | 6.112 |
| 1.105  | 0.283 | 19.000 | 0.405 | 0.476 | 6.112 |
| 2.932  | 0.009 | 19.000 | 0.418 | 0.476 | 6.112 |
| 0.369  | 0.716 | 19.000 | 0.436 | 0.476 | 6.112 |
| -1.429 | 0.169 | 19.000 | 0.611 | 0.476 | 6.112 |
| -0.086 | 0.933 | 19.000 | 0.658 | 0.476 | 6.112 |
| -1.207 | 0.242 | 19.000 | 0.609 | 0.476 | 6.112 |
| -0.849 | 0.406 | 19.000 | 1.443 | 0.476 | 6.112 |
| -0.690 | 0.499 | 19.000 | 0.551 | 0.476 | 6.112 |
| -1.396 | 0.179 | 19.000 | 0.590 | 0.476 | 6.112 |
| 0.653  | 0.522 | 19.000 | 0.377 | 0.476 | 6.112 |
| 3.693  | 0.002 | 19.000 | 0.429 | 0.476 | 6.112 |
| 0.048  | 0.962 | 19.000 | 0.620 | 0.476 | 6.112 |
| 2.606  | 0.017 | 19.000 | 0.630 | 0.476 | 6.112 |
| 1.328  | 0.200 | 19.000 | 0.431 | 0.476 | 6.112 |
| -1.558 | 0.136 | 19.000 | 0.417 | 0.476 | 6.112 |
| -1.742 | 0.098 | 19.000 | 0.314 | 0.476 | 6.112 |
| -2.464 | 0.023 | 19.000 | 0.349 | 0.476 | 6.112 |
| 0.412  | 0.685 | 19.000 | 0.749 | 0.476 | 6.112 |
| -1.045 | 0.309 | 19.000 | 0.697 | 0.476 | 6.112 |
| -0.494 | 0.627 | 19.000 | 0.603 | 0.476 | 6.112 |
| 3.260  | 0.004 | 19.000 | 0.310 | 0.476 | 6.112 |
| -2.178 | 0.042 | 19.000 | 0.429 | 0.476 | 6.112 |
| -0.626 | 0.539 | 19.000 | 0.714 | 0.476 | 6.112 |
| 2.384  | 0.028 | 19.000 | 0.302 | 0.476 | 6.112 |
| 2.280  | 0.034 | 19.000 | 0.502 | 0.476 | 6.112 |
| 0.784  | 0.443 | 19.000 | 0.850 | 0.476 | 6.112 |
| 1.803  | 0.087 | 19.000 | 0.414 | 0.476 | 6.112 |

|        |       |        |       |       |       |
|--------|-------|--------|-------|-------|-------|
| 1.715  | 0.103 | 19.000 | 0.537 | 0.476 | 6.112 |
| -0.050 | 0.961 | 19.000 | 1.622 | 0.476 | 6.112 |
| -0.736 | 0.471 | 19.000 | 0.454 | 0.476 | 6.112 |
| -2.091 | 0.050 | 19.000 | 0.635 | 0.476 | 6.112 |
| -3.143 | 0.005 | 19.000 | 0.594 | 0.476 | 6.112 |
| 2.686  | 0.015 | 19.000 | 0.421 | 0.476 | 6.112 |
| -1.808 | 0.086 | 19.000 | 0.866 | 0.476 | 6.112 |
| -1.055 | 0.305 | 19.000 | 0.645 | 0.476 | 6.112 |
| -1.115 | 0.279 | 19.000 | 0.446 | 0.476 | 6.112 |
| -0.553 | 0.587 | 19.000 | 0.518 | 0.476 | 6.112 |
| 2.029  | 0.057 | 19.000 | 0.391 | 0.476 | 6.112 |
| 0.330  | 0.745 | 19.000 | 0.484 | 0.476 | 6.112 |
| 1.291  | 0.212 | 19.000 | 0.453 | 0.476 | 6.112 |
| -1.844 | 0.081 | 19.000 | 0.354 | 0.476 | 6.112 |
| -2.128 | 0.047 | 19.000 | 0.348 | 0.476 | 6.112 |
| -2.519 | 0.021 | 19.000 | 0.593 | 0.476 | 6.112 |
| 0.891  | 0.384 | 19.000 | 0.468 | 0.476 | 6.112 |
| 0.887  | 0.386 | 19.000 | 0.439 | 0.476 | 6.112 |
| -2.120 | 0.047 | 19.000 | 0.350 | 0.476 | 6.112 |
| 0.922  | 0.368 | 19.000 | 0.455 | 0.476 | 6.112 |
| -2.825 | 0.011 | 19.000 | 0.523 | 0.476 | 6.112 |
| 2.604  | 0.017 | 19.000 | 0.659 | 0.476 | 6.112 |
| 2.302  | 0.033 | 19.000 | 0.378 | 0.476 | 6.112 |
| -1.104 | 0.283 | 19.000 | 0.299 | 0.476 | 6.112 |
| 1.402  | 0.177 | 19.000 | 0.232 | 0.476 | 6.112 |
| 3.483  | 0.002 | 19.000 | 0.245 | 0.476 | 6.112 |
| -1.333 | 0.198 | 19.000 | 0.306 | 0.476 | 6.112 |
| -3.337 | 0.003 | 19.000 | 0.625 | 0.476 | 6.112 |
| -1.442 | 0.166 | 19.000 | 0.426 | 0.476 | 6.112 |
| -1.901 | 0.073 | 19.000 | 0.611 | 0.476 | 6.112 |
| 2.328  | 0.031 | 19.000 | 0.332 | 0.476 | 6.112 |
| -0.181 | 0.858 | 19.000 | 0.421 | 0.476 | 6.112 |
| 2.257  | 0.036 | 19.000 | 0.683 | 0.476 | 6.112 |
| -1.679 | 0.110 | 19.000 | 0.492 | 0.476 | 6.112 |
| 1.521  | 0.145 | 19.000 | 0.728 | 0.476 | 6.112 |
| 1.467  | 0.159 | 19.000 | 0.313 | 0.476 | 6.112 |
| 0.399  | 0.695 | 19.000 | 0.238 | 0.476 | 6.112 |
| 0.065  | 0.949 | 19.000 | 0.291 | 0.476 | 6.112 |
| 1.403  | 0.177 | 19.000 | 0.318 | 0.476 | 6.112 |
| -1.403 | 0.177 | 19.000 | 0.727 | 0.476 | 6.112 |
| -1.203 | 0.244 | 19.000 | 0.282 | 0.476 | 6.112 |
| -2.791 | 0.012 | 19.000 | 0.439 | 0.476 | 6.112 |
| 1.294  | 0.211 | 19.000 | 0.327 | 0.476 | 6.112 |
| -0.268 | 0.792 | 19.000 | 0.775 | 0.476 | 6.112 |
| 1.022  | 0.320 | 19.000 | 1.253 | 0.476 | 6.112 |
| 0.686  | 0.501 | 19.000 | 0.569 | 0.476 | 6.112 |
| 0.223  | 0.826 | 19.000 | 0.630 | 0.476 | 6.112 |
| -2.757 | 0.013 | 19.000 | 0.335 | 0.476 | 6.112 |
| -0.666 | 0.514 | 19.000 | 0.579 | 0.476 | 6.112 |
| 0.083  | 0.935 | 19.000 | 0.417 | 0.476 | 6.112 |

|        |       |        |       |       |       |
|--------|-------|--------|-------|-------|-------|
| -0.407 | 0.688 | 19.000 | 0.551 | 0.476 | 6.112 |
| 1.123  | 0.275 | 19.000 | 0.807 | 0.476 | 6.112 |
| -1.267 | 0.221 | 19.000 | 1.295 | 0.476 | 6.112 |
| 1.685  | 0.108 | 19.000 | 1.112 | 0.476 | 6.112 |
| 1.129  | 0.273 | 19.000 | 0.435 | 0.476 | 6.112 |
| -0.698 | 0.494 | 19.000 | 0.741 | 0.476 | 6.112 |
| 2.037  | 0.056 | 19.000 | 0.515 | 0.476 | 6.112 |
| -1.942 | 0.067 | 19.000 | 0.711 | 0.476 | 6.112 |
| 1.445  | 0.165 | 19.000 | 0.411 | 0.476 | 6.112 |
| -2.890 | 0.009 | 19.000 | 0.501 | 0.476 | 6.112 |
| 2.276  | 0.035 | 19.000 | 1.044 | 0.476 | 6.112 |
| 0.970  | 0.344 | 19.000 | 0.349 | 0.476 | 6.112 |
| 1.138  | 0.269 | 19.000 | 0.528 | 0.476 | 6.112 |
| 2.502  | 0.022 | 19.000 | 0.440 | 0.476 | 6.112 |
| 0.397  | 0.696 | 19.000 | 0.319 | 0.476 | 6.112 |
| 1.076  | 0.296 | 19.000 | 0.550 | 0.476 | 6.112 |
| 1.138  | 0.269 | 19.000 | 0.587 | 0.476 | 6.112 |
| 1.629  | 0.120 | 19.000 | 0.610 | 0.476 | 6.112 |
| -3.402 | 0.003 | 19.000 | 0.287 | 0.476 | 6.112 |
| 1.395  | 0.179 | 19.000 | 0.968 | 0.476 | 6.112 |
| -1.492 | 0.152 | 19.000 | 0.584 | 0.476 | 6.112 |
| -2.151 | 0.045 | 19.000 | 0.359 | 0.476 | 6.112 |
| -0.598 | 0.557 | 19.000 | 0.902 | 0.476 | 6.112 |
| -0.612 | 0.548 | 19.000 | 0.388 | 0.476 | 6.112 |
| -0.505 | 0.619 | 19.000 | 0.913 | 0.476 | 6.112 |
| -1.709 | 0.104 | 19.000 | 0.355 | 0.476 | 6.112 |
| 2.704  | 0.014 | 19.000 | 0.623 | 0.476 | 6.112 |
| 2.015  | 0.058 | 19.000 | 0.274 | 0.476 | 6.112 |
| -2.561 | 0.019 | 19.000 | 0.652 | 0.476 | 6.112 |
| -1.608 | 0.124 | 19.000 | 0.920 | 0.476 | 6.112 |
| 1.793  | 0.089 | 19.000 | 0.501 | 0.476 | 6.112 |
| 0.811  | 0.427 | 19.000 | 0.384 | 0.476 | 6.112 |
| -0.653 | 0.521 | 19.000 | 0.374 | 0.476 | 6.112 |
| 0.683  | 0.503 | 19.000 | 0.773 | 0.476 | 6.112 |
| 1.152  | 0.264 | 19.000 | 0.619 | 0.476 | 6.112 |
| 1.845  | 0.081 | 19.000 | 0.431 | 0.476 | 6.112 |
| 2.390  | 0.027 | 19.000 | 0.499 | 0.476 | 6.112 |
| 0.734  | 0.472 | 19.000 | 0.357 | 0.476 | 6.112 |
| 1.188  | 0.250 | 19.000 | 0.484 | 0.476 | 6.112 |
| -1.149 | 0.265 | 19.000 | 0.523 | 0.476 | 6.112 |
| 2.020  | 0.058 | 19.000 | 0.517 | 0.476 | 6.112 |
| -2.287 | 0.034 | 19.000 | 0.266 | 0.476 | 6.112 |
| -0.412 | 0.685 | 19.000 | 0.441 | 0.476 | 6.112 |
| -0.564 | 0.579 | 19.000 | 0.404 | 0.476 | 6.112 |
| -3.039 | 0.007 | 19.000 | 0.374 | 0.476 | 6.112 |
| -2.240 | 0.037 | 19.000 | 0.514 | 0.476 | 6.112 |
| 0.395  | 0.698 | 19.000 | 0.604 | 0.476 | 6.112 |
| 0.104  | 0.918 | 19.000 | 0.460 | 0.476 | 6.112 |
| 2.338  | 0.030 | 19.000 | 0.985 | 0.476 | 6.112 |
| -1.549 | 0.138 | 19.000 | 0.427 | 0.476 | 6.112 |

|        |       |        |       |       |       |
|--------|-------|--------|-------|-------|-------|
| 2.493  | 0.022 | 19.000 | 0.428 | 0.476 | 6.112 |
| -2.178 | 0.042 | 19.000 | 0.365 | 0.476 | 6.112 |
| -2.284 | 0.034 | 19.000 | 0.862 | 0.476 | 6.112 |
| 2.036  | 0.056 | 19.000 | 0.969 | 0.476 | 6.112 |
| 1.242  | 0.229 | 19.000 | 0.479 | 0.476 | 6.112 |
| -0.052 | 0.959 | 19.000 | 0.355 | 0.476 | 6.112 |
| 1.927  | 0.069 | 19.000 | 0.787 | 0.476 | 6.112 |
| -1.284 | 0.214 | 19.000 | 0.425 | 0.476 | 6.112 |
| 0.534  | 0.600 | 19.000 | 0.352 | 0.476 | 6.112 |
| 2.474  | 0.023 | 19.000 | 0.908 | 0.476 | 6.112 |
| -2.473 | 0.023 | 19.000 | 0.696 | 0.476 | 6.112 |
| 0.550  | 0.589 | 19.000 | 0.495 | 0.476 | 6.112 |
| -2.106 | 0.049 | 19.000 | 0.577 | 0.476 | 6.112 |
| -0.141 | 0.889 | 19.000 | 0.417 | 0.476 | 6.112 |
| 1.567  | 0.134 | 19.000 | 0.379 | 0.476 | 6.112 |
| -1.573 | 0.132 | 19.000 | 0.926 | 0.476 | 6.112 |
| 0.814  | 0.425 | 19.000 | 0.446 | 0.476 | 6.112 |
| 1.722  | 0.101 | 19.000 | 0.693 | 0.476 | 6.112 |
| -2.187 | 0.041 | 19.000 | 0.433 | 0.476 | 6.112 |
| -0.653 | 0.522 | 19.000 | 0.376 | 0.476 | 6.112 |
| -4.077 | 0.001 | 19.000 | 0.468 | 0.476 | 6.112 |
| 2.351  | 0.030 | 19.000 | 0.388 | 0.476 | 6.112 |
| -0.416 | 0.682 | 19.000 | 0.479 | 0.476 | 6.112 |
| -2.082 | 0.051 | 19.000 | 0.639 | 0.476 | 6.112 |
| 0.790  | 0.439 | 19.000 | 0.415 | 0.476 | 6.112 |
| 1.918  | 0.070 | 19.000 | 0.780 | 0.476 | 6.112 |
| 0.989  | 0.335 | 19.000 | 0.541 | 0.476 | 6.112 |
| -2.761 | 0.012 | 19.000 | 0.345 | 0.476 | 6.112 |
| -0.978 | 0.341 | 19.000 | 0.820 | 0.476 | 6.112 |
| 1.634  | 0.119 | 19.000 | 0.408 | 0.476 | 6.112 |
| 0.043  | 0.966 | 19.000 | 0.830 | 0.476 | 6.112 |
| -0.532 | 0.601 | 19.000 | 0.785 | 0.476 | 6.112 |
| -2.252 | 0.036 | 19.000 | 0.591 | 0.476 | 6.112 |
| 0.529  | 0.603 | 19.000 | 0.882 | 0.476 | 6.112 |
| 0.918  | 0.370 | 19.000 | 0.720 | 0.476 | 6.112 |
| -1.091 | 0.289 | 19.000 | 0.699 | 0.476 | 6.112 |
| 2.320  | 0.032 | 19.000 | 0.318 | 0.476 | 6.112 |
| 1.846  | 0.081 | 19.000 | 0.397 | 0.476 | 6.112 |
| 2.792  | 0.012 | 19.000 | 0.293 | 0.476 | 6.112 |
| -1.342 | 0.195 | 19.000 | 0.483 | 0.476 | 6.112 |
| -3.119 | 0.006 | 19.000 | 0.438 | 0.476 | 6.112 |
| 1.487  | 0.154 | 19.000 | 0.272 | 0.476 | 6.112 |
| 1.452  | 0.163 | 19.000 | 0.395 | 0.476 | 6.112 |
| 3.024  | 0.007 | 19.000 | 0.318 | 0.476 | 6.112 |
| 1.792  | 0.089 | 19.000 | 0.478 | 0.476 | 6.112 |
| -0.460 | 0.651 | 19.000 | 0.425 | 0.476 | 6.112 |
| -1.792 | 0.089 | 19.000 | 0.286 | 0.476 | 6.112 |
| -0.511 | 0.616 | 19.000 | 0.613 | 0.476 | 6.112 |
| -2.362 | 0.029 | 19.000 | 0.565 | 0.476 | 6.112 |
| 0.795  | 0.436 | 19.000 | 1.000 | 0.476 | 6.112 |

|        |       |        |       |       |       |
|--------|-------|--------|-------|-------|-------|
| 1.126  | 0.274 | 19.000 | 0.370 | 0.476 | 6.112 |
| -0.498 | 0.624 | 19.000 | 1.165 | 0.476 | 6.112 |
| 0.964  | 0.347 | 19.000 | 0.448 | 0.476 | 6.112 |
| -0.497 | 0.625 | 19.000 | 1.162 | 0.476 | 6.112 |
| -0.297 | 0.770 | 19.000 | 0.395 | 0.476 | 6.112 |
| 1.593  | 0.128 | 19.000 | 1.420 | 0.476 | 6.112 |
| -0.156 | 0.877 | 19.000 | 0.471 | 0.476 | 6.112 |
| -2.233 | 0.038 | 19.000 | 0.310 | 0.476 | 6.112 |
| -1.442 | 0.165 | 19.000 | 0.728 | 0.476 | 6.112 |
| 1.864  | 0.078 | 19.000 | 1.213 | 0.476 | 6.112 |
| 2.063  | 0.053 | 19.000 | 0.696 | 0.476 | 6.112 |
| -1.744 | 0.097 | 19.000 | 0.977 | 0.476 | 6.112 |
| 0.634  | 0.533 | 19.000 | 0.455 | 0.476 | 6.112 |
| -1.554 | 0.137 | 19.000 | 0.357 | 0.476 | 6.112 |
| 2.076  | 0.052 | 19.000 | 0.358 | 0.476 | 6.112 |
| 1.599  | 0.126 | 19.000 | 0.710 | 0.476 | 6.112 |
| 1.888  | 0.074 | 19.000 | 0.541 | 0.476 | 6.112 |
| -0.825 | 0.419 | 19.000 | 0.680 | 0.476 | 6.112 |
| -1.027 | 0.317 | 19.000 | 0.429 | 0.476 | 6.112 |
| 0.111  | 0.913 | 19.000 | 0.605 | 0.476 | 6.112 |
| 1.260  | 0.223 | 19.000 | 0.462 | 0.476 | 6.112 |
| -1.968 | 0.064 | 19.000 | 0.585 | 0.476 | 6.112 |
| 1.178  | 0.253 | 19.000 | 0.399 | 0.476 | 6.112 |
| -0.151 | 0.882 | 19.000 | 1.350 | 0.476 | 6.112 |
| 3.005  | 0.007 | 19.000 | 1.668 | 0.476 | 6.112 |
| 1.977  | 0.063 | 19.000 | 0.370 | 0.476 | 6.112 |
| -0.557 | 0.584 | 19.000 | 0.807 | 0.476 | 6.112 |
| 1.527  | 0.143 | 19.000 | 0.440 | 0.476 | 6.112 |
| 2.061  | 0.053 | 19.000 | 0.584 | 0.476 | 6.112 |
| 2.439  | 0.025 | 19.000 | 0.507 | 0.476 | 6.112 |
| -1.115 | 0.279 | 19.000 | 0.654 | 0.476 | 6.112 |
| 1.878  | 0.076 | 19.000 | 0.555 | 0.476 | 6.112 |
| 2.146  | 0.045 | 19.000 | 0.516 | 0.476 | 6.112 |
| -2.243 | 0.037 | 19.000 | 0.435 | 0.476 | 6.112 |
| -1.800 | 0.088 | 19.000 | 0.491 | 0.476 | 6.112 |
| 0.374  | 0.713 | 19.000 | 0.444 | 0.476 | 6.112 |
| 0.220  | 0.828 | 19.000 | 0.555 | 0.476 | 6.112 |
| 1.569  | 0.133 | 19.000 | 0.497 | 0.476 | 6.112 |
| -0.323 | 0.751 | 19.000 | 0.492 | 0.476 | 6.112 |
| 0.575  | 0.572 | 19.000 | 0.278 | 0.476 | 6.112 |
| 0.050  | 0.961 | 19.000 | 0.545 | 0.476 | 6.112 |
| -1.968 | 0.064 | 19.000 | 0.601 | 0.476 | 6.112 |
| -3.735 | 0.001 | 19.000 | 0.379 | 0.476 | 6.112 |
| 2.308  | 0.032 | 19.000 | 0.633 | 0.476 | 6.112 |
| -2.087 | 0.051 | 19.000 | 0.673 | 0.476 | 6.112 |
| 1.799  | 0.088 | 19.000 | 0.400 | 0.476 | 6.112 |
| 2.433  | 0.025 | 19.000 | 0.351 | 0.476 | 6.112 |
| 0.944  | 0.357 | 19.000 | 0.504 | 0.476 | 6.112 |
| 0.484  | 0.634 | 19.000 | 0.621 | 0.476 | 6.112 |
| 3.318  | 0.004 | 19.000 | 0.524 | 0.476 | 6.112 |

|        |       |        |       |       |       |
|--------|-------|--------|-------|-------|-------|
| 2.363  | 0.029 | 19.000 | 0.323 | 0.476 | 6.112 |
| 0.796  | 0.436 | 19.000 | 0.296 | 0.476 | 6.112 |
| -2.378 | 0.028 | 19.000 | 0.481 | 0.476 | 6.112 |
| 0.628  | 0.538 | 19.000 | 0.721 | 0.476 | 6.112 |
| 1.287  | 0.214 | 19.000 | 0.357 | 0.476 | 6.112 |
| -0.266 | 0.793 | 19.000 | 0.464 | 0.476 | 6.112 |
| 2.023  | 0.057 | 19.000 | 0.333 | 0.476 | 6.112 |
| 2.016  | 0.058 | 19.000 | 0.467 | 0.476 | 6.112 |
| 1.191  | 0.249 | 19.000 | 0.290 | 0.476 | 6.112 |
| 2.953  | 0.008 | 19.000 | 0.232 | 0.476 | 6.112 |
| -1.761 | 0.094 | 19.000 | 0.709 | 0.476 | 6.112 |
| 2.969  | 0.008 | 19.000 | 0.617 | 0.476 | 6.112 |
| 2.964  | 0.008 | 19.000 | 1.100 | 0.476 | 6.112 |
| 2.294  | 0.033 | 19.000 | 0.570 | 0.476 | 6.112 |
| -2.402 | 0.027 | 19.000 | 0.330 | 0.476 | 6.112 |
| 2.683  | 0.015 | 19.000 | 0.783 | 0.476 | 6.112 |
| -1.658 | 0.114 | 19.000 | 0.702 | 0.476 | 6.112 |
| 1.255  | 0.225 | 19.000 | 0.346 | 0.476 | 6.112 |
| -1.179 | 0.253 | 19.000 | 0.455 | 0.476 | 6.112 |
| -3.086 | 0.006 | 19.000 | 0.449 | 0.476 | 6.112 |
| 0.766  | 0.453 | 19.000 | 0.736 | 0.476 | 6.112 |
| 1.495  | 0.151 | 19.000 | 0.640 | 0.476 | 6.112 |
| 2.400  | 0.027 | 19.000 | 0.857 | 0.476 | 6.112 |
| 1.477  | 0.156 | 19.000 | 0.907 | 0.476 | 6.112 |
| -2.741 | 0.013 | 19.000 | 0.305 | 0.476 | 6.112 |
| -0.755 | 0.460 | 19.000 | 0.588 | 0.476 | 6.112 |
| 2.998  | 0.007 | 19.000 | 0.572 | 0.476 | 6.112 |
| 0.921  | 0.369 | 19.000 | 0.357 | 0.476 | 6.112 |
| 1.841  | 0.081 | 19.000 | 0.314 | 0.476 | 6.112 |
| 1.151  | 0.264 | 19.000 | 0.382 | 0.476 | 6.112 |
| -2.577 | 0.018 | 19.000 | 0.736 | 0.476 | 6.112 |
| 0.786  | 0.441 | 19.000 | 0.770 | 0.476 | 6.112 |
| 2.263  | 0.036 | 19.000 | 0.371 | 0.476 | 6.112 |
| -1.978 | 0.063 | 19.000 | 0.446 | 0.476 | 6.112 |
| 1.187  | 0.250 | 19.000 | 0.239 | 0.476 | 6.112 |
| -1.590 | 0.128 | 19.000 | 0.438 | 0.476 | 6.112 |
| -1.844 | 0.081 | 19.000 | 0.769 | 0.476 | 6.112 |
| 1.056  | 0.304 | 19.000 | 0.523 | 0.476 | 6.112 |
| 4.131  | 0.001 | 19.000 | 0.429 | 0.476 | 6.112 |
| 2.275  | 0.035 | 19.000 | 0.489 | 0.476 | 6.112 |
| -0.005 | 0.996 | 19.000 | 0.590 | 0.476 | 6.112 |
| 1.244  | 0.229 | 19.000 | 0.397 | 0.476 | 6.112 |
| 1.951  | 0.066 | 19.000 | 0.363 | 0.476 | 6.112 |
| -0.658 | 0.519 | 19.000 | 0.554 | 0.476 | 6.112 |
| 1.437  | 0.167 | 19.000 | 0.361 | 0.476 | 6.112 |
| 0.368  | 0.717 | 19.000 | 0.377 | 0.476 | 6.112 |
| -1.423 | 0.171 | 19.000 | 0.368 | 0.476 | 6.112 |
| 2.167  | 0.043 | 19.000 | 0.519 | 0.476 | 6.112 |
| -0.760 | 0.457 | 19.000 | 0.533 | 0.476 | 6.112 |
| 0.883  | 0.389 | 19.000 | 0.719 | 0.476 | 6.112 |

|        |       |        |       |       |       |
|--------|-------|--------|-------|-------|-------|
| 1.307  | 0.207 | 19.000 | 0.311 | 0.476 | 6.112 |
| 1.062  | 0.301 | 19.000 | 0.462 | 0.476 | 6.112 |
| 2.688  | 0.015 | 19.000 | 0.534 | 0.476 | 6.112 |
| -3.241 | 0.004 | 19.000 | 0.421 | 0.476 | 6.112 |
| 1.804  | 0.087 | 19.000 | 0.360 | 0.476 | 6.112 |
| 0.780  | 0.445 | 19.000 | 0.808 | 0.476 | 6.112 |
| 0.753  | 0.461 | 19.000 | 0.399 | 0.476 | 6.112 |
| -0.340 | 0.737 | 19.000 | 0.316 | 0.476 | 6.112 |
| -2.112 | 0.048 | 19.000 | 0.531 | 0.476 | 6.112 |
| 2.150  | 0.045 | 19.000 | 0.369 | 0.476 | 6.112 |
| -1.418 | 0.172 | 19.000 | 0.372 | 0.476 | 6.112 |
| -3.183 | 0.005 | 19.000 | 0.562 | 0.476 | 6.112 |
| -2.225 | 0.038 | 19.000 | 0.439 | 0.476 | 6.112 |
| -1.405 | 0.176 | 19.000 | 0.481 | 0.476 | 6.112 |
| 3.124  | 0.006 | 19.000 | 0.656 | 0.476 | 6.112 |
| -1.686 | 0.108 | 19.000 | 0.942 | 0.476 | 6.112 |
| 1.854  | 0.079 | 19.000 | 0.584 | 0.476 | 6.112 |
| -1.932 | 0.068 | 19.000 | 0.401 | 0.476 | 6.112 |
| 1.621  | 0.121 | 19.000 | 0.880 | 0.476 | 6.112 |
| -1.484 | 0.154 | 19.000 | 0.731 | 0.476 | 6.112 |
| 2.057  | 0.054 | 19.000 | 1.277 | 0.476 | 6.112 |
| 1.962  | 0.065 | 19.000 | 0.295 | 0.476 | 6.112 |
| -4.178 | 0.001 | 19.000 | 0.286 | 0.476 | 6.112 |
| 1.298  | 0.210 | 19.000 | 0.448 | 0.476 | 6.112 |
| 0.577  | 0.571 | 19.000 | 0.569 | 0.476 | 6.112 |
| 0.065  | 0.949 | 19.000 | 0.574 | 0.476 | 6.112 |
| 3.163  | 0.005 | 19.000 | 0.315 | 0.476 | 6.112 |
| 1.174  | 0.255 | 19.000 | 0.464 | 0.476 | 6.112 |
| -0.063 | 0.950 | 19.000 | 0.381 | 0.476 | 6.112 |
| 0.147  | 0.885 | 19.000 | 0.372 | 0.476 | 6.112 |
| 0.573  | 0.573 | 19.000 | 0.504 | 0.476 | 6.112 |
| -2.905 | 0.009 | 19.000 | 0.897 | 0.476 | 6.112 |
| 1.663  | 0.113 | 19.000 | 0.560 | 0.476 | 6.112 |
| 0.534  | 0.599 | 19.000 | 0.362 | 0.476 | 6.112 |
| -0.852 | 0.405 | 19.000 | 1.673 | 0.476 | 6.112 |
| 0.591  | 0.561 | 19.000 | 0.416 | 0.476 | 6.112 |
| 0.411  | 0.686 | 19.000 | 0.783 | 0.476 | 6.112 |
| 0.249  | 0.806 | 19.000 | 0.557 | 0.476 | 6.112 |
| 1.693  | 0.107 | 19.000 | 0.951 | 0.476 | 6.112 |
| 2.647  | 0.016 | 19.000 | 0.921 | 0.476 | 6.112 |
| 1.306  | 0.207 | 19.000 | 0.744 | 0.476 | 6.112 |
| -1.491 | 0.152 | 19.000 | 1.897 | 0.476 | 6.112 |
| 0.597  | 0.557 | 19.000 | 0.678 | 0.476 | 6.112 |
| 2.387  | 0.028 | 19.000 | 1.077 | 0.476 | 6.112 |
| -3.435 | 0.003 | 19.000 | 0.652 | 0.476 | 6.112 |
| 0.820  | 0.422 | 19.000 | 0.807 | 0.476 | 6.112 |
| -0.079 | 0.938 | 19.000 | 0.376 | 0.476 | 6.112 |
| 0.767  | 0.453 | 19.000 | 0.598 | 0.476 | 6.112 |
| 1.142  | 0.267 | 19.000 | 0.905 | 0.476 | 6.112 |
| -0.680 | 0.505 | 19.000 | 0.498 | 0.476 | 6.112 |

|        |       |        |       |       |       |
|--------|-------|--------|-------|-------|-------|
| -0.104 | 0.918 | 19.000 | 0.487 | 0.476 | 6.112 |
| 1.275  | 0.218 | 19.000 | 0.419 | 0.476 | 6.112 |
| -1.248 | 0.227 | 19.000 | 0.446 | 0.476 | 6.112 |
| 1.898  | 0.073 | 19.000 | 0.659 | 0.476 | 6.112 |
| 2.680  | 0.015 | 19.000 | 0.488 | 0.476 | 6.112 |
| 2.530  | 0.020 | 19.000 | 0.927 | 0.476 | 6.112 |
| -1.335 | 0.198 | 19.000 | 0.428 | 0.476 | 6.112 |
| -0.958 | 0.350 | 19.000 | 0.328 | 0.476 | 6.112 |
| 1.346  | 0.194 | 19.000 | 0.470 | 0.476 | 6.112 |
| 0.431  | 0.671 | 19.000 | 0.502 | 0.476 | 6.112 |
| 1.037  | 0.313 | 19.000 | 0.386 | 0.476 | 6.112 |
| 2.282  | 0.034 | 19.000 | 0.528 | 0.476 | 6.112 |
| 2.247  | 0.037 | 19.000 | 0.499 | 0.476 | 6.112 |
| 1.391  | 0.180 | 19.000 | 0.752 | 0.476 | 6.112 |
| 1.113  | 0.280 | 19.000 | 0.562 | 0.476 | 6.112 |
| 1.441  | 0.166 | 19.000 | 0.682 | 0.476 | 6.112 |
| -1.977 | 0.063 | 19.000 | 0.527 | 0.476 | 6.112 |
| 1.815  | 0.085 | 19.000 | 0.464 | 0.476 | 6.112 |
| -2.084 | 0.051 | 19.000 | 0.572 | 0.476 | 6.112 |
| 3.036  | 0.007 | 19.000 | 0.585 | 0.476 | 6.112 |
| 0.618  | 0.544 | 19.000 | 0.481 | 0.476 | 6.112 |
| -1.367 | 0.188 | 19.000 | 0.485 | 0.476 | 6.112 |
| -3.051 | 0.007 | 19.000 | 0.392 | 0.476 | 6.112 |
| 0.868  | 0.396 | 19.000 | 0.593 | 0.476 | 6.112 |
| 3.500  | 0.002 | 19.000 | 0.753 | 0.476 | 6.112 |
| -1.077 | 0.295 | 19.000 | 0.714 | 0.476 | 6.112 |
| -2.132 | 0.046 | 19.000 | 0.346 | 0.476 | 6.112 |
| -1.184 | 0.251 | 19.000 | 0.392 | 0.476 | 6.112 |
| 0.059  | 0.954 | 19.000 | 0.565 | 0.476 | 6.112 |
| 2.882  | 0.010 | 19.000 | 0.567 | 0.476 | 6.112 |
| 1.376  | 0.185 | 19.000 | 0.825 | 0.476 | 6.112 |
| 0.343  | 0.735 | 19.000 | 0.642 | 0.476 | 6.112 |
| 1.229  | 0.234 | 19.000 | 0.651 | 0.476 | 6.112 |
| 0.558  | 0.583 | 19.000 | 0.485 | 0.476 | 6.112 |
| 1.958  | 0.065 | 19.000 | 0.713 | 0.476 | 6.112 |
| 2.206  | 0.040 | 19.000 | 0.932 | 0.476 | 6.112 |
| 2.432  | 0.025 | 19.000 | 0.492 | 0.476 | 6.112 |
| 1.698  | 0.106 | 19.000 | 0.579 | 0.476 | 6.112 |
| 3.614  | 0.002 | 19.000 | 0.637 | 0.476 | 6.112 |
| 0.555  | 0.586 | 19.000 | 1.537 | 0.476 | 6.112 |
| 2.599  | 0.018 | 19.000 | 0.248 | 0.476 | 6.112 |
| -2.161 | 0.044 | 19.000 | 0.467 | 0.476 | 6.112 |
| -2.016 | 0.058 | 19.000 | 0.740 | 0.476 | 6.112 |
| -2.515 | 0.021 | 19.000 | 0.517 | 0.476 | 6.112 |
| 0.216  | 0.831 | 19.000 | 0.559 | 0.476 | 6.112 |
| 4.539  | 0.000 | 19.000 | 0.225 | 0.476 | 6.112 |
| -1.029 | 0.316 | 19.000 | 0.439 | 0.476 | 6.112 |
| -2.458 | 0.024 | 19.000 | 0.357 | 0.476 | 6.112 |
| 0.788  | 0.440 | 19.000 | 0.300 | 0.476 | 6.112 |
| 1.466  | 0.159 | 19.000 | 0.943 | 0.476 | 6.112 |



|        |       |        |       |       |       |
|--------|-------|--------|-------|-------|-------|
| 0.639  | 0.530 | 19.000 | 0.570 | 0.476 | 6.112 |
| 1.902  | 0.072 | 19.000 | 0.657 | 0.476 | 6.112 |
| -0.534 | 0.599 | 19.000 | 0.464 | 0.476 | 6.112 |
| -2.349 | 0.030 | 19.000 | 0.712 | 0.476 | 6.112 |
| -1.817 | 0.085 | 19.000 | 0.715 | 0.476 | 6.112 |
| 1.113  | 0.280 | 19.000 | 0.331 | 0.476 | 6.112 |
| 1.303  | 0.208 | 19.000 | 0.573 | 0.476 | 6.112 |
| -1.410 | 0.175 | 19.000 | 0.344 | 0.476 | 6.112 |
| -2.803 | 0.011 | 19.000 | 0.614 | 0.476 | 6.112 |
| -2.129 | 0.047 | 19.000 | 0.444 | 0.476 | 6.112 |
| 1.960  | 0.065 | 19.000 | 0.476 | 0.476 | 6.112 |
| 2.723  | 0.014 | 19.000 | 0.599 | 0.476 | 6.112 |
| 1.909  | 0.071 | 19.000 | 0.330 | 0.476 | 6.112 |
| 0.234  | 0.818 | 19.000 | 0.402 | 0.476 | 6.112 |
| 1.302  | 0.208 | 19.000 | 0.423 | 0.476 | 6.112 |
| 1.065  | 0.300 | 19.000 | 0.570 | 0.476 | 6.112 |
| 1.558  | 0.136 | 19.000 | 0.454 | 0.476 | 6.112 |
| -2.333 | 0.031 | 19.000 | 0.373 | 0.476 | 6.112 |
| 1.518  | 0.146 | 19.000 | 1.123 | 0.476 | 6.112 |
| 3.088  | 0.006 | 19.000 | 0.376 | 0.476 | 6.112 |
| 2.819  | 0.011 | 19.000 | 0.275 | 0.476 | 6.112 |
| 2.055  | 0.054 | 19.000 | 0.761 | 0.476 | 6.112 |
| -0.531 | 0.601 | 19.000 | 0.714 | 0.476 | 6.112 |
| -0.539 | 0.596 | 19.000 | 0.780 | 0.476 | 6.112 |
| -0.657 | 0.519 | 19.000 | 1.038 | 0.476 | 6.112 |
| -0.751 | 0.462 | 19.000 | 0.692 | 0.476 | 6.112 |
| -0.089 | 0.930 | 19.000 | 0.618 | 0.476 | 6.112 |
| -1.726 | 0.100 | 19.000 | 1.122 | 0.476 | 6.112 |
| -0.511 | 0.615 | 19.000 | 0.340 | 0.476 | 6.112 |
| -1.350 | 0.193 | 19.000 | 0.381 | 0.476 | 6.112 |
| -0.667 | 0.513 | 19.000 | 0.821 | 0.476 | 6.112 |
| 3.961  | 0.001 | 19.000 | 0.265 | 0.476 | 6.112 |
| 1.435  | 0.168 | 19.000 | 0.429 | 0.476 | 6.112 |
| 2.107  | 0.049 | 19.000 | 1.014 | 0.476 | 6.112 |
| 0.580  | 0.569 | 19.000 | 0.771 | 0.476 | 6.112 |
| -0.814 | 0.426 | 19.000 | 0.511 | 0.476 | 6.112 |
| -0.447 | 0.660 | 19.000 | 0.361 | 0.476 | 6.112 |
| -0.478 | 0.638 | 19.000 | 0.563 | 0.476 | 6.112 |
| -1.386 | 0.182 | 19.000 | 0.411 | 0.476 | 6.112 |
| -2.051 | 0.054 | 19.000 | 0.649 | 0.476 | 6.112 |
| 0.540  | 0.596 | 19.000 | 0.938 | 0.476 | 6.112 |
| -0.277 | 0.784 | 19.000 | 0.311 | 0.476 | 6.112 |
| 2.619  | 0.017 | 19.000 | 0.440 | 0.476 | 6.112 |
| -1.014 | 0.323 | 19.000 | 0.540 | 0.476 | 6.112 |
| 0.100  | 0.921 | 19.000 | 0.531 | 0.476 | 6.112 |
| -1.701 | 0.105 | 19.000 | 0.573 | 0.476 | 6.112 |
| 0.265  | 0.794 | 19.000 | 0.792 | 0.476 | 6.112 |
| -0.973 | 0.343 | 19.000 | 0.699 | 0.476 | 6.112 |
| -0.038 | 0.970 | 19.000 | 0.578 | 0.476 | 6.112 |
| -0.251 | 0.805 | 19.000 | 0.359 | 0.476 | 6.112 |

|        |       |        |       |       |       |
|--------|-------|--------|-------|-------|-------|
| -1.647 | 0.116 | 19.000 | 0.580 | 0.476 | 6.112 |
| 0.838  | 0.412 | 19.000 | 0.267 | 0.476 | 6.112 |
| -0.709 | 0.487 | 19.000 | 0.389 | 0.476 | 6.112 |
| -0.609 | 0.550 | 19.000 | 0.479 | 0.476 | 6.112 |
| 0.100  | 0.921 | 19.000 | 0.420 | 0.476 | 6.112 |
| -1.148 | 0.265 | 19.000 | 0.403 | 0.476 | 6.112 |
| -0.706 | 0.488 | 19.000 | 0.485 | 0.476 | 6.112 |
| 0.851  | 0.405 | 19.000 | 0.836 | 0.476 | 6.112 |
| -0.962 | 0.348 | 19.000 | 0.519 | 0.476 | 6.112 |
| -0.948 | 0.355 | 19.000 | 0.679 | 0.476 | 6.112 |
| -1.319 | 0.203 | 19.000 | 0.254 | 0.476 | 6.112 |
| 0.233  | 0.819 | 19.000 | 0.910 | 0.476 | 6.112 |
| -0.254 | 0.802 | 19.000 | 0.555 | 0.476 | 6.112 |
| -0.595 | 0.559 | 19.000 | 0.569 | 0.476 | 6.112 |
| -2.158 | 0.044 | 19.000 | 0.413 | 0.476 | 6.112 |
| -1.349 | 0.193 | 19.000 | 0.583 | 0.476 | 6.112 |
| -0.906 | 0.376 | 19.000 | 0.847 | 0.476 | 6.112 |
| -0.244 | 0.810 | 19.000 | 0.925 | 0.476 | 6.112 |
| -1.679 | 0.109 | 19.000 | 0.670 | 0.476 | 6.112 |
| -0.451 | 0.657 | 19.000 | 0.679 | 0.476 | 6.112 |
| -3.767 | 0.001 | 19.000 | 0.263 | 0.476 | 6.112 |
| -1.926 | 0.069 | 19.000 | 0.207 | 0.476 | 6.112 |
| -2.190 | 0.041 | 19.000 | 0.629 | 0.476 | 6.112 |
| -1.009 | 0.325 | 19.000 | 0.380 | 0.476 | 6.112 |
| -0.180 | 0.859 | 19.000 | 0.362 | 0.476 | 6.112 |
| 1.431  | 0.169 | 19.000 | 0.266 | 0.476 | 6.112 |
| -1.758 | 0.095 | 19.000 | 0.470 | 0.476 | 6.112 |
| -2.837 | 0.011 | 19.000 | 0.452 | 0.476 | 6.112 |
| -1.644 | 0.117 | 19.000 | 0.553 | 0.476 | 6.112 |
| -1.783 | 0.091 | 19.000 | 0.362 | 0.476 | 6.112 |
| 0.790  | 0.439 | 19.000 | 0.249 | 0.476 | 6.112 |
| -0.686 | 0.501 | 19.000 | 0.461 | 0.476 | 6.112 |
| -1.217 | 0.239 | 19.000 | 0.250 | 0.476 | 6.112 |
| -1.230 | 0.234 | 19.000 | 0.563 | 0.476 | 6.112 |
| -0.727 | 0.476 | 19.000 | 0.457 | 0.476 | 6.112 |
| -0.636 | 0.532 | 19.000 | 0.869 | 0.476 | 6.112 |
| 0.327  | 0.747 | 19.000 | 0.552 | 0.476 | 6.112 |
| -1.945 | 0.067 | 19.000 | 0.299 | 0.476 | 6.112 |
| -0.105 | 0.917 | 19.000 | 0.484 | 0.476 | 6.112 |
| -2.497 | 0.022 | 19.000 | 0.351 | 0.476 | 6.112 |
| -0.081 | 0.936 | 19.000 | 0.446 | 0.476 | 6.112 |
| 0.175  | 0.863 | 19.000 | 0.680 | 0.476 | 6.112 |
| -0.082 | 0.936 | 19.000 | 0.428 | 0.476 | 6.112 |
| -0.900 | 0.379 | 19.000 | 0.862 | 0.476 | 6.112 |
| -1.248 | 0.227 | 19.000 | 0.895 | 0.476 | 6.112 |
| -1.641 | 0.117 | 19.000 | 0.318 | 0.476 | 6.112 |
| -1.680 | 0.109 | 19.000 | 0.581 | 0.476 | 6.112 |
| -0.588 | 0.563 | 19.000 | 0.353 | 0.476 | 6.112 |
| -1.642 | 0.117 | 19.000 | 0.508 | 0.476 | 6.112 |
| -1.694 | 0.107 | 19.000 | 0.477 | 0.476 | 6.112 |

|        |       |        |       |       |       |
|--------|-------|--------|-------|-------|-------|
| 0.509  | 0.617 | 19.000 | 0.419 | 0.476 | 6.112 |
| -0.057 | 0.955 | 19.000 | 0.487 | 0.476 | 6.112 |
| -1.101 | 0.285 | 19.000 | 0.601 | 0.476 | 6.112 |
| -0.173 | 0.864 | 19.000 | 0.243 | 0.476 | 6.112 |
| 0.426  | 0.675 | 19.000 | 0.271 | 0.476 | 6.112 |
| -1.809 | 0.086 | 19.000 | 0.318 | 0.476 | 6.112 |
| -1.994 | 0.061 | 19.000 | 0.672 | 0.476 | 6.112 |
| -0.058 | 0.955 | 19.000 | 0.417 | 0.476 | 6.112 |
| -1.501 | 0.150 | 19.000 | 0.500 | 0.476 | 6.112 |
| 1.527  | 0.143 | 19.000 | 0.717 | 0.476 | 6.112 |
| -1.150 | 0.265 | 19.000 | 0.418 | 0.476 | 6.112 |
| 1.214  | 0.240 | 19.000 | 1.154 | 0.476 | 6.112 |
| 1.694  | 0.107 | 19.000 | 0.842 | 0.476 | 6.112 |
| 1.110  | 0.281 | 19.000 | 0.767 | 0.476 | 6.112 |
| 2.185  | 0.042 | 19.000 | 0.562 | 0.476 | 6.112 |
| 1.680  | 0.109 | 19.000 | 1.071 | 0.476 | 6.112 |
| 1.631  | 0.119 | 19.000 | 0.763 | 0.476 | 6.112 |
| 0.957  | 0.351 | 19.000 | 0.972 | 0.476 | 6.112 |
| 1.557  | 0.136 | 19.000 | 0.782 | 0.476 | 6.112 |
| 1.791  | 0.089 | 19.000 | 1.012 | 0.476 | 6.112 |
| 1.658  | 0.114 | 19.000 | 0.736 | 0.476 | 6.112 |
| 1.705  | 0.104 | 19.000 | 0.972 | 0.476 | 6.112 |
| 0.998  | 0.331 | 19.000 | 0.708 | 0.476 | 6.112 |
| 1.493  | 0.152 | 19.000 | 0.864 | 0.476 | 6.112 |
| 1.466  | 0.159 | 19.000 | 1.081 | 0.476 | 6.112 |
| 1.468  | 0.158 | 19.000 | 0.952 | 0.476 | 6.112 |
| 1.486  | 0.154 | 19.000 | 1.068 | 0.476 | 6.112 |
| -0.288 | 0.776 | 19.000 | 1.482 | 0.476 | 6.112 |
| 1.441  | 0.166 | 19.000 | 0.910 | 0.476 | 6.112 |
| 1.745  | 0.097 | 19.000 | 0.940 | 0.476 | 6.112 |
| 1.777  | 0.092 | 19.000 | 0.899 | 0.476 | 6.112 |
| 1.488  | 0.153 | 19.000 | 1.366 | 0.476 | 6.112 |
| 1.655  | 0.114 | 19.000 | 1.057 | 0.476 | 6.112 |
| 0.566  | 0.578 | 19.000 | 0.459 | 0.476 | 6.112 |
| 1.662  | 0.113 | 19.000 | 1.108 | 0.476 | 6.112 |
| 1.468  | 0.158 | 19.000 | 0.822 | 0.476 | 6.112 |
| -0.194 | 0.848 | 19.000 | 0.898 | 0.476 | 6.112 |
| 0.809  | 0.428 | 19.000 | 0.968 | 0.476 | 6.112 |
| 2.020  | 0.058 | 19.000 | 0.689 | 0.476 | 6.112 |
| 0.937  | 0.360 | 19.000 | 1.114 | 0.476 | 6.112 |
| 0.005  | 0.996 | 19.000 | 1.006 | 0.476 | 6.112 |
| 1.327  | 0.200 | 19.000 | 1.176 | 0.476 | 6.112 |
| 1.712  | 0.103 | 19.000 | 0.500 | 0.476 | 6.112 |
| 1.626  | 0.120 | 19.000 | 0.969 | 0.476 | 6.112 |
| 1.234  | 0.232 | 19.000 | 0.707 | 0.476 | 6.112 |
| 1.640  | 0.117 | 19.000 | 0.665 | 0.476 | 6.112 |
| 1.372  | 0.186 | 19.000 | 0.611 | 0.476 | 6.112 |
| 1.276  | 0.217 | 19.000 | 0.620 | 0.476 | 6.112 |
| 1.004  | 0.328 | 19.000 | 0.755 | 0.476 | 6.112 |
| 1.125  | 0.275 | 19.000 | 0.803 | 0.476 | 6.112 |

|        |       |        |       |       |       |
|--------|-------|--------|-------|-------|-------|
| 2.204  | 0.040 | 19.000 | 0.994 | 0.476 | 6.112 |
| 1.214  | 0.240 | 19.000 | 1.093 | 0.476 | 6.112 |
| 1.290  | 0.213 | 19.000 | 0.835 | 0.476 | 6.112 |
| 2.024  | 0.057 | 19.000 | 0.979 | 0.476 | 6.112 |
| 1.819  | 0.085 | 19.000 | 1.035 | 0.476 | 6.112 |
| 1.650  | 0.115 | 19.000 | 0.525 | 0.476 | 6.112 |
| 1.756  | 0.095 | 19.000 | 0.791 | 0.476 | 6.112 |
| 1.484  | 0.154 | 19.000 | 0.673 | 0.476 | 6.112 |
| 1.751  | 0.096 | 19.000 | 0.628 | 0.476 | 6.112 |
| 0.845  | 0.408 | 19.000 | 1.044 | 0.476 | 6.112 |
| 1.687  | 0.108 | 19.000 | 0.532 | 0.476 | 6.112 |
| 1.605  | 0.125 | 19.000 | 0.543 | 0.476 | 6.112 |
| 1.650  | 0.115 | 19.000 | 0.485 | 0.476 | 6.112 |
| 2.737  | 0.013 | 19.000 | 0.710 | 0.476 | 6.112 |
| 0.695  | 0.495 | 19.000 | 0.473 | 0.476 | 6.112 |
| 0.814  | 0.426 | 19.000 | 0.393 | 0.476 | 6.112 |
| 2.165  | 0.043 | 19.000 | 0.548 | 0.476 | 6.112 |
| -0.173 | 0.865 | 19.000 | 0.389 | 0.476 | 6.112 |
| 1.175  | 0.254 | 19.000 | 1.305 | 0.476 | 6.112 |
| 1.084  | 0.292 | 19.000 | 0.531 | 0.476 | 6.112 |
| 1.588  | 0.129 | 19.000 | 0.645 | 0.476 | 6.112 |
| 1.308  | 0.207 | 19.000 | 0.594 | 0.476 | 6.112 |
| 1.970  | 0.064 | 19.000 | 0.659 | 0.476 | 6.112 |
| 1.035  | 0.314 | 19.000 | 0.589 | 0.476 | 6.112 |
| 1.699  | 0.106 | 19.000 | 0.645 | 0.476 | 6.112 |
| -3.314 | 0.004 | 19.000 | 0.224 | 0.476 | 6.112 |
| -3.100 | 0.006 | 19.000 | 0.221 | 0.476 | 6.112 |
| -0.746 | 0.465 | 19.000 | 0.366 | 0.476 | 6.112 |
| -1.515 | 0.146 | 19.000 | 0.799 | 0.476 | 6.112 |
| -2.087 | 0.051 | 19.000 | 0.468 | 0.476 | 6.112 |
| -0.866 | 0.397 | 19.000 | 0.639 | 0.476 | 6.112 |
| 0.353  | 0.728 | 19.000 | 0.489 | 0.476 | 6.112 |
| -0.438 | 0.666 | 19.000 | 0.395 | 0.476 | 6.112 |
| -1.697 | 0.106 | 19.000 | 0.399 | 0.476 | 6.112 |
| -1.393 | 0.180 | 19.000 | 0.597 | 0.476 | 6.112 |
| 0.798  | 0.435 | 19.000 | 0.417 | 0.476 | 6.112 |
| -1.215 | 0.239 | 19.000 | 0.576 | 0.476 | 6.112 |
| -0.326 | 0.748 | 19.000 | 0.662 | 0.476 | 6.112 |
| -1.805 | 0.087 | 19.000 | 0.270 | 0.476 | 6.112 |
| -2.063 | 0.053 | 19.000 | 0.496 | 0.476 | 6.112 |
| -0.016 | 0.987 | 19.000 | 0.664 | 0.476 | 6.112 |
| 0.556  | 0.585 | 19.000 | 0.703 | 0.476 | 6.112 |
| -0.560 | 0.582 | 19.000 | 0.378 | 0.476 | 6.112 |
| -1.053 | 0.306 | 19.000 | 0.436 | 0.476 | 6.112 |
| 2.050  | 0.054 | 19.000 | 0.670 | 0.476 | 6.112 |
| 0.559  | 0.583 | 19.000 | 0.409 | 0.476 | 6.112 |
| -2.118 | 0.048 | 19.000 | 0.335 | 0.476 | 6.112 |
| -0.191 | 0.850 | 19.000 | 0.555 | 0.476 | 6.112 |
| -1.593 | 0.128 | 19.000 | 0.495 | 0.476 | 6.112 |
| 0.208  | 0.837 | 19.000 | 0.326 | 0.476 | 6.112 |

|        |       |        |       |       |       |
|--------|-------|--------|-------|-------|-------|
| -3.343 | 0.003 | 19.000 | 0.210 | 0.476 | 6.112 |
| -2.634 | 0.016 | 19.000 | 0.300 | 0.476 | 6.112 |
| -0.375 | 0.712 | 19.000 | 0.476 | 0.476 | 6.112 |
| 0.310  | 0.760 | 19.000 | 0.693 | 0.476 | 6.112 |
| -1.445 | 0.165 | 19.000 | 0.366 | 0.476 | 6.112 |
| -0.149 | 0.883 | 19.000 | 0.385 | 0.476 | 6.112 |
| 0.825  | 0.420 | 19.000 | 0.452 | 0.476 | 6.112 |
| -2.328 | 0.031 | 19.000 | 0.291 | 0.476 | 6.112 |
| -1.922 | 0.070 | 19.000 | 0.329 | 0.476 | 6.112 |
| 0.327  | 0.747 | 19.000 | 0.584 | 0.476 | 6.112 |
| -1.401 | 0.177 | 19.000 | 0.523 | 0.476 | 6.112 |
| -0.394 | 0.698 | 19.000 | 0.378 | 0.476 | 6.112 |
| -1.785 | 0.090 | 19.000 | 0.455 | 0.476 | 6.112 |
| 0.303  | 0.765 | 19.000 | 0.377 | 0.476 | 6.112 |
| 0.663  | 0.515 | 19.000 | 0.412 | 0.476 | 6.112 |
| -0.372 | 0.714 | 19.000 | 0.647 | 0.476 | 6.112 |
| -0.955 | 0.352 | 19.000 | 0.388 | 0.476 | 6.112 |
| 1.072  | 0.297 | 19.000 | 0.561 | 0.476 | 6.112 |
| -0.272 | 0.788 | 19.000 | 0.500 | 0.476 | 6.112 |
| -1.358 | 0.190 | 19.000 | 0.530 | 0.476 | 6.112 |
| -0.449 | 0.659 | 19.000 | 0.465 | 0.476 | 6.112 |
| -0.705 | 0.490 | 19.000 | 0.394 | 0.476 | 6.112 |
| -0.193 | 0.849 | 19.000 | 0.320 | 0.476 | 6.112 |
| -1.353 | 0.192 | 19.000 | 0.387 | 0.476 | 6.112 |
| 1.251  | 0.226 | 19.000 | 0.570 | 0.476 | 6.112 |
| -2.467 | 0.023 | 19.000 | 0.345 | 0.476 | 6.112 |
| 0.236  | 0.816 | 19.000 | 0.458 | 0.476 | 6.112 |
| -2.918 | 0.009 | 19.000 | 0.308 | 0.476 | 6.112 |
| 1.353  | 0.192 | 19.000 | 0.507 | 0.476 | 6.112 |
| -1.742 | 0.098 | 19.000 | 0.530 | 0.476 | 6.112 |
| 1.704  | 0.105 | 19.000 | 0.883 | 0.476 | 6.112 |
| 1.177  | 0.254 | 19.000 | 0.680 | 0.476 | 6.112 |
| 1.038  | 0.312 | 19.000 | 0.415 | 0.476 | 6.112 |
| -0.981 | 0.339 | 19.000 | 0.443 | 0.476 | 6.112 |
| 1.654  | 0.115 | 19.000 | 0.469 | 0.476 | 6.112 |
| 2.369  | 0.029 | 19.000 | 0.707 | 0.476 | 6.112 |
| 1.529  | 0.143 | 19.000 | 0.623 | 0.476 | 6.112 |
| -2.633 | 0.016 | 19.000 | 0.359 | 0.476 | 6.112 |
| 1.918  | 0.070 | 19.000 | 0.715 | 0.476 | 6.112 |
| 0.722  | 0.479 | 19.000 | 0.375 | 0.476 | 6.112 |
| -1.981 | 0.062 | 19.000 | 0.446 | 0.476 | 6.112 |
| -0.861 | 0.400 | 19.000 | 0.555 | 0.476 | 6.112 |
| -1.524 | 0.144 | 19.000 | 0.547 | 0.476 | 6.112 |
| -2.383 | 0.028 | 19.000 | 0.485 | 0.476 | 6.112 |
| 2.367  | 0.029 | 19.000 | 0.742 | 0.476 | 6.112 |
| -0.708 | 0.488 | 19.000 | 0.280 | 0.476 | 6.112 |
| 0.259  | 0.798 | 19.000 | 0.475 | 0.476 | 6.112 |
| 0.103  | 0.919 | 19.000 | 0.379 | 0.476 | 6.112 |
| 1.242  | 0.229 | 19.000 | 0.277 | 0.476 | 6.112 |
| 2.271  | 0.035 | 19.000 | 0.958 | 0.476 | 6.112 |

|        |       |        |       |       |       |
|--------|-------|--------|-------|-------|-------|
| -1.996 | 0.060 | 19.000 | 0.387 | 0.476 | 6.112 |
| 1.613  | 0.123 | 19.000 | 0.334 | 0.476 | 6.112 |
| 0.784  | 0.443 | 19.000 | 0.531 | 0.476 | 6.112 |
| 2.025  | 0.057 | 19.000 | 0.468 | 0.476 | 6.112 |
| 1.668  | 0.112 | 19.000 | 0.392 | 0.476 | 6.112 |
| 2.290  | 0.034 | 19.000 | 0.482 | 0.476 | 6.112 |
| 1.880  | 0.075 | 19.000 | 0.658 | 0.476 | 6.112 |
| 2.558  | 0.019 | 19.000 | 0.764 | 0.476 | 6.112 |
| 1.966  | 0.064 | 19.000 | 0.412 | 0.476 | 6.112 |
| -1.070 | 0.298 | 19.000 | 0.677 | 0.476 | 6.112 |
| 2.812  | 0.011 | 19.000 | 0.696 | 0.476 | 6.112 |
| 0.894  | 0.383 | 19.000 | 0.639 | 0.476 | 6.112 |
| 2.766  | 0.012 | 19.000 | 0.762 | 0.476 | 6.112 |
| -1.464 | 0.159 | 19.000 | 0.418 | 0.476 | 6.112 |
| 1.792  | 0.089 | 19.000 | 0.522 | 0.476 | 6.112 |
| -4.208 | 0.000 | 19.000 | 0.535 | 0.476 | 6.112 |
| -1.822 | 0.084 | 19.000 | 0.318 | 0.476 | 6.112 |
| -0.345 | 0.734 | 19.000 | 0.559 | 0.476 | 6.112 |
| -2.648 | 0.016 | 19.000 | 0.427 | 0.476 | 6.112 |
| 2.517  | 0.021 | 19.000 | 0.351 | 0.476 | 6.112 |
| -3.040 | 0.007 | 19.000 | 0.553 | 0.476 | 6.112 |
| 0.164  | 0.872 | 19.000 | 0.338 | 0.476 | 6.112 |
| -1.276 | 0.217 | 19.000 | 0.473 | 0.476 | 6.112 |
| -2.313 | 0.032 | 19.000 | 0.285 | 0.476 | 6.112 |
| -0.268 | 0.792 | 19.000 | 0.419 | 0.476 | 6.112 |
| -0.876 | 0.392 | 19.000 | 0.541 | 0.476 | 6.112 |
| 0.085  | 0.933 | 19.000 | 0.492 | 0.476 | 6.112 |
| -0.672 | 0.510 | 19.000 | 0.750 | 0.476 | 6.112 |
| 1.539  | 0.140 | 19.000 | 0.522 | 0.476 | 6.112 |
| -0.649 | 0.524 | 19.000 | 0.658 | 0.476 | 6.112 |
| -0.515 | 0.613 | 19.000 | 0.507 | 0.476 | 6.112 |
| -3.156 | 0.005 | 19.000 | 0.541 | 0.476 | 6.112 |
| -2.495 | 0.022 | 19.000 | 0.517 | 0.476 | 6.112 |
| -2.790 | 0.012 | 19.000 | 0.449 | 0.476 | 6.112 |
| 0.589  | 0.563 | 19.000 | 0.516 | 0.476 | 6.112 |
| 0.501  | 0.622 | 19.000 | 0.792 | 0.476 | 6.112 |
| 0.254  | 0.802 | 19.000 | 0.407 | 0.476 | 6.112 |
| 0.308  | 0.762 | 19.000 | 0.474 | 0.476 | 6.112 |
| -0.750 | 0.462 | 19.000 | 0.458 | 0.476 | 6.112 |
| -1.638 | 0.118 | 19.000 | 0.508 | 0.476 | 6.112 |
| -0.874 | 0.393 | 19.000 | 0.552 | 0.476 | 6.112 |
| 0.316  | 0.755 | 19.000 | 0.501 | 0.476 | 6.112 |
| 1.831  | 0.083 | 19.000 | 0.278 | 0.476 | 6.112 |
| 2.574  | 0.019 | 19.000 | 0.434 | 0.476 | 6.112 |
| 0.293  | 0.773 | 19.000 | 0.580 | 0.476 | 6.112 |
| -0.951 | 0.354 | 19.000 | 0.552 | 0.476 | 6.112 |
| 0.576  | 0.571 | 19.000 | 0.422 | 0.476 | 6.112 |
| 1.922  | 0.070 | 19.000 | 0.967 | 0.476 | 6.112 |
| -1.559 | 0.135 | 19.000 | 0.443 | 0.476 | 6.112 |
| 2.219  | 0.039 | 19.000 | 0.204 | 0.476 | 6.112 |

|        |       |        |       |       |       |
|--------|-------|--------|-------|-------|-------|
| 1.249  | 0.227 | 19.000 | 0.409 | 0.476 | 6.112 |
| -2.233 | 0.038 | 19.000 | 0.388 | 0.476 | 6.112 |
| 2.382  | 0.028 | 19.000 | 0.504 | 0.476 | 6.112 |
| 1.323  | 0.201 | 19.000 | 0.704 | 0.476 | 6.112 |
| -2.232 | 0.038 | 19.000 | 0.712 | 0.476 | 6.112 |
| -0.849 | 0.406 | 19.000 | 0.387 | 0.476 | 6.112 |
| 0.322  | 0.751 | 19.000 | 0.329 | 0.476 | 6.112 |
| 1.432  | 0.168 | 19.000 | 0.474 | 0.476 | 6.112 |
| -2.756 | 0.013 | 19.000 | 0.395 | 0.476 | 6.112 |
| -1.432 | 0.168 | 19.000 | 0.538 | 0.476 | 6.112 |
| -1.184 | 0.251 | 19.000 | 0.679 | 0.476 | 6.112 |
| -1.154 | 0.263 | 19.000 | 0.432 | 0.476 | 6.112 |
| -0.005 | 0.996 | 19.000 | 0.521 | 0.476 | 6.112 |
| 0.998  | 0.331 | 19.000 | 0.378 | 0.476 | 6.112 |
| 2.134  | 0.046 | 19.000 | 0.863 | 0.476 | 6.112 |
| 0.242  | 0.811 | 19.000 | 0.462 | 0.476 | 6.112 |
| 1.258  | 0.224 | 19.000 | 0.537 | 0.476 | 6.112 |
| 0.752  | 0.461 | 19.000 | 0.579 | 0.476 | 6.112 |
| 0.255  | 0.801 | 19.000 | 0.425 | 0.476 | 6.112 |
| 2.514  | 0.021 | 19.000 | 0.395 | 0.476 | 6.112 |
| 1.396  | 0.179 | 19.000 | 0.287 | 0.476 | 6.112 |
| 0.970  | 0.344 | 19.000 | 0.642 | 0.476 | 6.112 |
| 2.252  | 0.036 | 19.000 | 0.744 | 0.476 | 6.112 |
| 1.962  | 0.065 | 19.000 | 0.552 | 0.476 | 6.112 |
| -2.143 | 0.045 | 19.000 | 0.501 | 0.476 | 6.112 |
| 0.149  | 0.884 | 19.000 | 0.728 | 0.476 | 6.112 |
| -0.070 | 0.945 | 19.000 | 0.341 | 0.476 | 6.112 |
| 2.569  | 0.019 | 19.000 | 0.919 | 0.476 | 6.112 |
| 0.558  | 0.583 | 19.000 | 0.601 | 0.476 | 6.112 |
| -1.347 | 0.194 | 19.000 | 0.594 | 0.476 | 6.112 |
| -0.191 | 0.851 | 19.000 | 0.690 | 0.476 | 6.112 |
| -0.698 | 0.494 | 19.000 | 0.367 | 0.476 | 6.112 |
| 0.468  | 0.645 | 19.000 | 0.570 | 0.476 | 6.112 |
| -2.402 | 0.027 | 19.000 | 0.458 | 0.476 | 6.112 |
| -1.358 | 0.190 | 19.000 | 0.425 | 0.476 | 6.112 |
| -3.394 | 0.003 | 19.000 | 0.280 | 0.476 | 6.112 |
| -2.581 | 0.018 | 19.000 | 0.537 | 0.476 | 6.112 |
| 0.073  | 0.942 | 19.000 | 0.688 | 0.476 | 6.112 |
| -2.018 | 0.058 | 19.000 | 0.478 | 0.476 | 6.112 |
| -2.465 | 0.023 | 19.000 | 0.429 | 0.476 | 6.112 |
| 1.192  | 0.248 | 19.000 | 0.276 | 0.476 | 6.112 |
| 1.971  | 0.063 | 19.000 | 0.381 | 0.476 | 6.112 |
| -0.056 | 0.956 | 19.000 | 0.204 | 0.476 | 6.112 |
| -2.228 | 0.038 | 19.000 | 0.714 | 0.476 | 6.112 |
| -0.155 | 0.878 | 19.000 | 0.310 | 0.476 | 6.112 |
| 2.189  | 0.041 | 19.000 | 0.525 | 0.476 | 6.112 |
| 2.676  | 0.015 | 19.000 | 0.942 | 0.476 | 6.112 |
| 2.037  | 0.056 | 19.000 | 0.373 | 0.476 | 6.112 |
| 0.089  | 0.930 | 19.000 | 0.384 | 0.476 | 6.112 |
| 1.896  | 0.073 | 19.000 | 0.276 | 0.476 | 6.112 |

|        |       |        |       |       |       |
|--------|-------|--------|-------|-------|-------|
| 1.768  | 0.093 | 19.000 | 0.587 | 0.476 | 6.112 |
| -0.167 | 0.869 | 19.000 | 0.404 | 0.476 | 6.112 |
| -2.256 | 0.036 | 19.000 | 0.291 | 0.476 | 6.112 |
| -1.966 | 0.064 | 19.000 | 0.322 | 0.476 | 6.112 |
| 1.058  | 0.303 | 19.000 | 0.354 | 0.476 | 6.112 |
| -0.469 | 0.644 | 19.000 | 0.463 | 0.476 | 6.112 |
| 0.306  | 0.763 | 19.000 | 1.241 | 0.476 | 6.112 |
| 1.707  | 0.104 | 19.000 | 0.711 | 0.476 | 6.112 |
| 2.272  | 0.035 | 19.000 | 0.829 | 0.476 | 6.112 |
| 1.577  | 0.131 | 19.000 | 0.567 | 0.476 | 6.112 |
| 2.028  | 0.057 | 19.000 | 0.571 | 0.476 | 6.112 |
| 2.629  | 0.017 | 19.000 | 0.704 | 0.476 | 6.112 |
| -2.316 | 0.032 | 19.000 | 0.913 | 0.476 | 6.112 |
| 2.118  | 0.048 | 19.000 | 0.362 | 0.476 | 6.112 |
| 0.826  | 0.419 | 19.000 | 0.388 | 0.476 | 6.112 |
| -1.341 | 0.196 | 19.000 | 0.492 | 0.476 | 6.112 |
| -1.953 | 0.066 | 19.000 | 0.405 | 0.476 | 6.112 |
| 1.906  | 0.072 | 19.000 | 0.524 | 0.476 | 6.112 |
| -1.058 | 0.303 | 19.000 | 0.705 | 0.476 | 6.112 |
| -2.095 | 0.050 | 19.000 | 0.444 | 0.476 | 6.112 |
| 2.559  | 0.019 | 19.000 | 1.118 | 0.476 | 6.112 |
| 2.004  | 0.060 | 19.000 | 0.327 | 0.476 | 6.112 |
| 1.865  | 0.078 | 19.000 | 1.116 | 0.476 | 6.112 |
| -0.199 | 0.844 | 19.000 | 0.470 | 0.476 | 6.112 |
| 2.110  | 0.048 | 19.000 | 0.830 | 0.476 | 6.112 |
| -0.616 | 0.545 | 19.000 | 0.527 | 0.476 | 6.112 |
| -0.277 | 0.784 | 19.000 | 0.816 | 0.476 | 6.112 |
| 2.819  | 0.011 | 19.000 | 0.789 | 0.476 | 6.112 |
| -2.235 | 0.038 | 19.000 | 0.427 | 0.476 | 6.112 |
| 2.330  | 0.031 | 19.000 | 0.424 | 0.476 | 6.112 |
| 2.978  | 0.008 | 19.000 | 0.505 | 0.476 | 6.112 |
| 0.832  | 0.416 | 19.000 | 0.311 | 0.476 | 6.112 |
| -0.441 | 0.664 | 19.000 | 0.376 | 0.476 | 6.112 |
| -2.391 | 0.027 | 19.000 | 0.355 | 0.476 | 6.112 |
| 1.438  | 0.167 | 19.000 | 0.486 | 0.476 | 6.112 |
| 1.230  | 0.234 | 19.000 | 0.438 | 0.476 | 6.112 |
| -1.594 | 0.127 | 19.000 | 0.439 | 0.476 | 6.112 |
| 1.728  | 0.100 | 19.000 | 0.413 | 0.476 | 6.112 |
| -2.204 | 0.040 | 19.000 | 0.446 | 0.476 | 6.112 |
| -0.996 | 0.332 | 19.000 | 0.288 | 0.476 | 6.112 |
| 2.398  | 0.027 | 19.000 | 0.947 | 0.476 | 6.112 |
| 1.375  | 0.185 | 19.000 | 0.398 | 0.476 | 6.112 |
| 2.915  | 0.009 | 19.000 | 0.322 | 0.476 | 6.112 |
| 0.261  | 0.797 | 19.000 | 1.137 | 0.476 | 6.112 |
| -0.355 | 0.727 | 19.000 | 0.627 | 0.476 | 6.112 |
| 0.228  | 0.822 | 19.000 | 0.386 | 0.476 | 6.112 |
| 2.424  | 0.026 | 19.000 | 0.684 | 0.476 | 6.112 |
| -1.581 | 0.130 | 19.000 | 0.693 | 0.476 | 6.112 |
| 2.583  | 0.018 | 19.000 | 0.592 | 0.476 | 6.112 |
| -0.691 | 0.498 | 19.000 | 0.736 | 0.476 | 6.112 |



|        |       |        |       |       |       |
|--------|-------|--------|-------|-------|-------|
| 1.898  | 0.073 | 19.000 | 0.315 | 0.476 | 6.112 |
| -1.011 | 0.325 | 19.000 | 0.454 | 0.476 | 6.112 |
| 2.219  | 0.039 | 19.000 | 0.318 | 0.476 | 6.112 |
| -3.239 | 0.004 | 19.000 | 0.738 | 0.476 | 6.112 |
| -1.441 | 0.166 | 19.000 | 0.466 | 0.476 | 6.112 |
| 1.764  | 0.094 | 19.000 | 1.157 | 0.476 | 6.112 |
| 2.375  | 0.028 | 19.000 | 0.476 | 0.476 | 6.112 |
| 0.260  | 0.798 | 19.000 | 0.628 | 0.476 | 6.112 |
| 0.392  | 0.699 | 19.000 | 0.283 | 0.476 | 6.112 |
| 0.786  | 0.442 | 19.000 | 0.372 | 0.476 | 6.112 |
| -2.796 | 0.012 | 19.000 | 0.737 | 0.476 | 6.112 |
| 2.044  | 0.055 | 19.000 | 0.592 | 0.476 | 6.112 |
| 1.161  | 0.260 | 19.000 | 0.259 | 0.476 | 6.112 |
| 2.519  | 0.021 | 19.000 | 0.210 | 0.476 | 6.112 |
| 2.993  | 0.007 | 19.000 | 0.498 | 0.476 | 6.112 |
| 2.679  | 0.015 | 19.000 | 0.317 | 0.476 | 6.112 |
| 1.599  | 0.126 | 19.000 | 0.552 | 0.476 | 6.112 |
| 1.887  | 0.075 | 19.000 | 0.696 | 0.476 | 6.112 |
| 0.257  | 0.800 | 19.000 | 0.374 | 0.476 | 6.112 |
| 3.243  | 0.004 | 19.000 | 0.547 | 0.476 | 6.112 |
| 1.576  | 0.131 | 19.000 | 1.116 | 0.476 | 6.112 |
| -1.683 | 0.109 | 19.000 | 0.284 | 0.476 | 6.112 |
| -1.306 | 0.207 | 19.000 | 0.309 | 0.476 | 6.112 |
| 2.307  | 0.032 | 19.000 | 0.660 | 0.476 | 6.112 |
| -0.968 | 0.345 | 19.000 | 0.553 | 0.476 | 6.112 |
| -2.307 | 0.032 | 19.000 | 0.377 | 0.476 | 6.112 |
| 2.562  | 0.019 | 19.000 | 0.533 | 0.476 | 6.112 |
| 2.531  | 0.020 | 19.000 | 0.371 | 0.476 | 6.112 |
| 2.944  | 0.008 | 19.000 | 0.701 | 0.476 | 6.112 |
| -0.133 | 0.896 | 19.000 | 0.272 | 0.476 | 6.112 |
| 1.979  | 0.062 | 19.000 | 0.964 | 0.476 | 6.112 |
| -0.997 | 0.331 | 19.000 | 0.448 | 0.476 | 6.112 |
| 2.109  | 0.048 | 19.000 | 0.263 | 0.476 | 6.112 |
| 0.302  | 0.766 | 19.000 | 0.344 | 0.476 | 6.112 |
| 1.685  | 0.108 | 19.000 | 0.317 | 0.476 | 6.112 |
| 1.688  | 0.108 | 19.000 | 0.436 | 0.476 | 6.112 |
| -0.117 | 0.908 | 19.000 | 0.484 | 0.476 | 6.112 |
| 2.155  | 0.044 | 19.000 | 0.409 | 0.476 | 6.112 |
| -0.317 | 0.755 | 19.000 | 0.443 | 0.476 | 6.112 |
| 1.860  | 0.079 | 19.000 | 1.154 | 0.476 | 6.112 |
| -0.476 | 0.640 | 19.000 | 0.545 | 0.476 | 6.112 |
| -2.222 | 0.039 | 19.000 | 0.492 | 0.476 | 6.112 |
| -0.718 | 0.481 | 19.000 | 0.444 | 0.476 | 6.112 |
| 1.565  | 0.134 | 19.000 | 0.249 | 0.476 | 6.112 |
| 1.358  | 0.190 | 19.000 | 0.544 | 0.476 | 6.112 |
| -1.658 | 0.114 | 19.000 | 0.827 | 0.476 | 6.112 |
| -1.421 | 0.172 | 19.000 | 0.560 | 0.476 | 6.112 |
| 1.715  | 0.103 | 19.000 | 0.821 | 0.476 | 6.112 |
| 2.674  | 0.015 | 19.000 | 0.390 | 0.476 | 6.112 |
| 1.262  | 0.222 | 19.000 | 0.380 | 0.476 | 6.112 |

|        |       |        |       |       |       |
|--------|-------|--------|-------|-------|-------|
| 1.765  | 0.094 | 19.000 | 0.793 | 0.476 | 6.112 |
| 2.415  | 0.026 | 19.000 | 1.141 | 0.476 | 6.112 |
| 0.458  | 0.652 | 19.000 | 1.318 | 0.476 | 6.112 |
| -0.521 | 0.608 | 19.000 | 0.495 | 0.476 | 6.112 |
| -1.241 | 0.230 | 19.000 | 0.394 | 0.476 | 6.112 |
| 2.281  | 0.034 | 19.000 | 0.907 | 0.476 | 6.112 |
| 1.383  | 0.183 | 19.000 | 0.788 | 0.476 | 6.112 |
| 1.980  | 0.062 | 19.000 | 0.567 | 0.476 | 6.112 |
| -1.568 | 0.133 | 19.000 | 0.332 | 0.476 | 6.112 |
| 1.783  | 0.091 | 19.000 | 0.473 | 0.476 | 6.112 |
| -2.663 | 0.015 | 19.000 | 0.557 | 0.476 | 6.112 |
| 1.920  | 0.070 | 19.000 | 1.141 | 0.476 | 6.112 |
| 1.854  | 0.079 | 19.000 | 1.285 | 0.476 | 6.112 |
| 1.642  | 0.117 | 19.000 | 0.777 | 0.476 | 6.112 |
| -1.181 | 0.252 | 19.000 | 0.472 | 0.476 | 6.112 |
| 2.143  | 0.045 | 19.000 | 0.487 | 0.476 | 6.112 |
| -2.657 | 0.016 | 19.000 | 0.500 | 0.476 | 6.112 |
| 2.388  | 0.028 | 19.000 | 0.499 | 0.476 | 6.112 |
| 2.301  | 0.033 | 19.000 | 0.495 | 0.476 | 6.112 |
| 3.342  | 0.003 | 19.000 | 0.337 | 0.476 | 6.112 |
| -2.319 | 0.032 | 19.000 | 0.598 | 0.476 | 6.112 |
| 1.762  | 0.094 | 19.000 | 0.865 | 0.476 | 6.112 |
| 2.784  | 0.012 | 19.000 | 0.459 | 0.476 | 6.112 |
| -2.317 | 0.032 | 19.000 | 0.676 | 0.476 | 6.112 |
| -2.114 | 0.048 | 19.000 | 0.584 | 0.476 | 6.112 |
| 0.991  | 0.334 | 19.000 | 0.577 | 0.476 | 6.112 |
| -0.127 | 0.900 | 19.000 | 0.366 | 0.476 | 6.112 |
| 3.002  | 0.007 | 19.000 | 0.707 | 0.476 | 6.112 |
| 1.538  | 0.140 | 19.000 | 0.564 | 0.476 | 6.112 |
| 2.874  | 0.010 | 19.000 | 0.504 | 0.476 | 6.112 |
| -2.638 | 0.016 | 19.000 | 0.555 | 0.476 | 6.112 |
| 2.579  | 0.018 | 19.000 | 1.001 | 0.476 | 6.112 |
| 1.222  | 0.237 | 19.000 | 0.661 | 0.476 | 6.112 |
| 2.277  | 0.035 | 19.000 | 0.407 | 0.476 | 6.112 |
| 2.234  | 0.038 | 19.000 | 0.879 | 0.476 | 6.112 |
| 1.887  | 0.075 | 19.000 | 0.404 | 0.476 | 6.112 |
| 2.504  | 0.022 | 19.000 | 0.918 | 0.476 | 6.112 |
| 1.657  | 0.114 | 19.000 | 0.455 | 0.476 | 6.112 |
| 0.969  | 0.345 | 19.000 | 1.533 | 0.476 | 6.112 |
| 1.368  | 0.187 | 19.000 | 0.692 | 0.476 | 6.112 |
| 1.724  | 0.101 | 19.000 | 1.454 | 0.476 | 6.112 |
| 2.187  | 0.041 | 19.000 | 0.757 | 0.476 | 6.112 |
| 0.627  | 0.538 | 19.000 | 0.504 | 0.476 | 6.112 |
| 2.946  | 0.008 | 19.000 | 0.970 | 0.476 | 6.112 |
| 2.574  | 0.019 | 19.000 | 0.339 | 0.476 | 6.112 |
| -0.209 | 0.837 | 19.000 | 0.715 | 0.476 | 6.112 |
| -2.080 | 0.051 | 19.000 | 0.580 | 0.476 | 6.112 |
| 0.827  | 0.419 | 19.000 | 0.990 | 0.476 | 6.112 |
| -0.321 | 0.752 | 19.000 | 0.483 | 0.476 | 6.112 |
| 0.673  | 0.509 | 19.000 | 0.460 | 0.476 | 6.112 |

|        |       |        |       |       |       |
|--------|-------|--------|-------|-------|-------|
| 0.536  | 0.598 | 19.000 | 0.976 | 0.476 | 6.112 |
| 1.273  | 0.218 | 19.000 | 0.862 | 0.476 | 6.112 |
| 1.576  | 0.132 | 19.000 | 0.381 | 0.476 | 6.112 |
| 0.390  | 0.701 | 19.000 | 0.416 | 0.476 | 6.112 |
| -0.664 | 0.515 | 19.000 | 0.489 | 0.476 | 6.112 |
| -2.541 | 0.020 | 19.000 | 0.564 | 0.476 | 6.112 |
| 1.641  | 0.117 | 19.000 | 0.304 | 0.476 | 6.112 |
| 2.231  | 0.038 | 19.000 | 0.352 | 0.476 | 6.112 |
| 2.665  | 0.015 | 19.000 | 0.381 | 0.476 | 6.112 |
| 0.912  | 0.373 | 19.000 | 0.309 | 0.476 | 6.112 |
| -0.857 | 0.402 | 19.000 | 0.670 | 0.476 | 6.112 |
| 0.023  | 0.982 | 19.000 | 0.599 | 0.476 | 6.112 |
| -1.261 | 0.223 | 19.000 | 0.421 | 0.476 | 6.112 |
| 2.008  | 0.059 | 19.000 | 0.751 | 0.476 | 6.112 |
| -3.783 | 0.001 | 19.000 | 0.359 | 0.476 | 6.112 |
| -2.573 | 0.019 | 19.000 | 0.346 | 0.476 | 6.112 |
| -2.587 | 0.018 | 19.000 | 0.561 | 0.476 | 6.112 |
| 1.268  | 0.220 | 19.000 | 0.267 | 0.476 | 6.112 |
| 0.629  | 0.537 | 19.000 | 0.353 | 0.476 | 6.112 |
| 0.467  | 0.646 | 19.000 | 0.343 | 0.476 | 6.112 |
| -2.069 | 0.052 | 19.000 | 0.317 | 0.476 | 6.112 |
| 1.404  | 0.177 | 19.000 | 0.547 | 0.476 | 6.112 |
| 1.124  | 0.275 | 19.000 | 0.483 | 0.476 | 6.112 |
| -0.945 | 0.357 | 19.000 | 0.591 | 0.476 | 6.112 |
| -0.836 | 0.413 | 19.000 | 0.766 | 0.476 | 6.112 |
| -0.535 | 0.599 | 19.000 | 0.488 | 0.476 | 6.112 |
| -0.647 | 0.525 | 19.000 | 0.656 | 0.476 | 6.112 |
| -0.705 | 0.490 | 19.000 | 0.433 | 0.476 | 6.112 |
| -0.755 | 0.459 | 19.000 | 0.615 | 0.476 | 6.112 |
| -0.897 | 0.381 | 19.000 | 0.527 | 0.476 | 6.112 |
| -2.442 | 0.025 | 19.000 | 0.622 | 0.476 | 6.112 |
| -1.279 | 0.216 | 19.000 | 0.520 | 0.476 | 6.112 |
| 0.153  | 0.880 | 19.000 | 0.350 | 0.476 | 6.112 |
| 2.256  | 0.036 | 19.000 | 0.615 | 0.476 | 6.112 |
| 0.153  | 0.880 | 19.000 | 0.405 | 0.476 | 6.112 |
| 1.800  | 0.088 | 19.000 | 0.687 | 0.476 | 6.112 |
| 0.495  | 0.626 | 19.000 | 0.492 | 0.476 | 6.112 |
| 2.674  | 0.015 | 19.000 | 0.473 | 0.476 | 6.112 |
| 1.757  | 0.095 | 19.000 | 0.428 | 0.476 | 6.112 |
| 1.580  | 0.131 | 19.000 | 0.407 | 0.476 | 6.112 |
| 2.645  | 0.016 | 19.000 | 1.228 | 0.476 | 6.112 |
| 3.882  | 0.001 | 19.000 | 0.240 | 0.476 | 6.112 |
| -1.289 | 0.213 | 19.000 | 0.440 | 0.476 | 6.112 |
| 3.097  | 0.006 | 19.000 | 0.471 | 0.476 | 6.112 |
| 0.934  | 0.362 | 19.000 | 0.442 | 0.476 | 6.112 |
| -1.431 | 0.169 | 19.000 | 0.522 | 0.476 | 6.112 |
| 1.426  | 0.170 | 19.000 | 0.927 | 0.476 | 6.112 |
| 0.350  | 0.730 | 19.000 | 0.364 | 0.476 | 6.112 |
| 2.346  | 0.030 | 19.000 | 0.420 | 0.476 | 6.112 |
| -1.234 | 0.232 | 19.000 | 0.379 | 0.476 | 6.112 |

|        |       |        |       |       |       |
|--------|-------|--------|-------|-------|-------|
| -0.580 | 0.568 | 19.000 | 0.502 | 0.476 | 6.112 |
| -2.360 | 0.029 | 19.000 | 0.299 | 0.476 | 6.112 |
| 0.949  | 0.355 | 19.000 | 0.660 | 0.476 | 6.112 |
| -3.470 | 0.003 | 19.000 | 0.329 | 0.476 | 6.112 |
| -1.051 | 0.307 | 19.000 | 0.399 | 0.476 | 6.112 |
| -3.163 | 0.005 | 19.000 | 0.358 | 0.476 | 6.112 |
| -1.099 | 0.286 | 19.000 | 0.314 | 0.476 | 6.112 |
| 0.691  | 0.498 | 19.000 | 0.357 | 0.476 | 6.112 |
| -0.629 | 0.537 | 19.000 | 0.556 | 0.476 | 6.112 |
| 1.837  | 0.082 | 19.000 | 0.248 | 0.476 | 6.112 |
| -2.732 | 0.013 | 19.000 | 0.486 | 0.476 | 6.112 |
| -0.277 | 0.785 | 19.000 | 0.420 | 0.476 | 6.112 |
| -0.168 | 0.868 | 19.000 | 0.756 | 0.476 | 6.112 |
| -0.239 | 0.814 | 19.000 | 0.502 | 0.476 | 6.112 |
| 3.549  | 0.002 | 19.000 | 0.485 | 0.476 | 6.112 |
| 0.528  | 0.603 | 19.000 | 0.532 | 0.476 | 6.112 |
| 1.515  | 0.146 | 19.000 | 0.354 | 0.476 | 6.112 |
| 0.738  | 0.469 | 19.000 | 0.401 | 0.476 | 6.112 |
| 1.678  | 0.110 | 19.000 | 0.520 | 0.476 | 6.112 |
| 1.759  | 0.095 | 19.000 | 0.438 | 0.476 | 6.112 |
| -0.312 | 0.759 | 19.000 | 0.324 | 0.476 | 6.112 |
| 1.355  | 0.191 | 19.000 | 0.412 | 0.476 | 6.112 |
| 0.732  | 0.473 | 19.000 | 0.427 | 0.476 | 6.112 |
| -0.355 | 0.726 | 19.000 | 0.904 | 0.476 | 6.112 |
| -0.219 | 0.829 | 19.000 | 0.385 | 0.476 | 6.112 |
| -0.750 | 0.462 | 19.000 | 0.426 | 0.476 | 6.112 |
| -1.744 | 0.097 | 19.000 | 0.947 | 0.476 | 6.112 |
| -1.647 | 0.116 | 19.000 | 0.365 | 0.476 | 6.112 |
| 1.653  | 0.115 | 19.000 | 0.600 | 0.476 | 6.112 |
| 1.905  | 0.072 | 19.000 | 0.895 | 0.476 | 6.112 |
| 1.159  | 0.261 | 19.000 | 0.642 | 0.476 | 6.112 |
| -0.123 | 0.903 | 19.000 | 0.500 | 0.476 | 6.112 |
| -1.784 | 0.090 | 19.000 | 0.429 | 0.476 | 6.112 |
| -0.597 | 0.558 | 19.000 | 0.377 | 0.476 | 6.112 |
| 1.300  | 0.209 | 19.000 | 0.630 | 0.476 | 6.112 |
| -0.607 | 0.551 | 19.000 | 0.525 | 0.476 | 6.112 |
| 2.221  | 0.039 | 19.000 | 0.588 | 0.476 | 6.112 |
| -3.030 | 0.007 | 19.000 | 0.502 | 0.476 | 6.112 |
| 2.808  | 0.011 | 19.000 | 1.732 | 0.476 | 6.112 |
| 2.172  | 0.043 | 19.000 | 0.242 | 0.476 | 6.112 |
| 0.592  | 0.561 | 19.000 | 0.450 | 0.476 | 6.112 |
| 3.298  | 0.004 | 19.000 | 0.567 | 0.476 | 6.112 |
| 0.718  | 0.482 | 19.000 | 0.219 | 0.476 | 6.112 |
| -1.025 | 0.318 | 19.000 | 0.297 | 0.476 | 6.112 |
| -2.506 | 0.021 | 19.000 | 0.812 | 0.476 | 6.112 |
| 0.732  | 0.473 | 19.000 | 0.381 | 0.476 | 6.112 |
| -0.831 | 0.417 | 19.000 | 0.332 | 0.476 | 6.112 |
| -0.410 | 0.686 | 19.000 | 0.409 | 0.476 | 6.112 |
| 1.752  | 0.096 | 19.000 | 0.371 | 0.476 | 6.112 |
| 1.816  | 0.085 | 19.000 | 0.576 | 0.476 | 6.112 |

|        |       |        |       |       |       |
|--------|-------|--------|-------|-------|-------|
| 2.524  | 0.021 | 19.000 | 0.427 | 0.476 | 6.112 |
| -2.539 | 0.020 | 19.000 | 0.576 | 0.476 | 6.112 |
| -1.963 | 0.064 | 19.000 | 0.423 | 0.476 | 6.112 |
| -0.788 | 0.440 | 19.000 | 0.537 | 0.476 | 6.112 |
| 1.442  | 0.166 | 19.000 | 0.519 | 0.476 | 6.112 |
| -1.047 | 0.308 | 19.000 | 0.521 | 0.476 | 6.112 |
| -1.558 | 0.136 | 19.000 | 0.686 | 0.476 | 6.112 |
| 1.117  | 0.278 | 19.000 | 0.584 | 0.476 | 6.112 |
| -0.691 | 0.498 | 19.000 | 0.526 | 0.476 | 6.112 |
| -0.914 | 0.372 | 19.000 | 0.411 | 0.476 | 6.112 |
| 1.135  | 0.270 | 19.000 | 0.596 | 0.476 | 6.112 |
| -0.426 | 0.675 | 19.000 | 0.320 | 0.476 | 6.112 |
| 1.493  | 0.152 | 19.000 | 0.592 | 0.476 | 6.112 |
| 0.832  | 0.415 | 19.000 | 0.450 | 0.476 | 6.112 |
| -1.702 | 0.105 | 19.000 | 0.560 | 0.476 | 6.112 |
| 1.629  | 0.120 | 19.000 | 0.420 | 0.476 | 6.112 |
| 0.659  | 0.518 | 19.000 | 0.663 | 0.476 | 6.112 |
| 0.922  | 0.368 | 19.000 | 0.717 | 0.476 | 6.112 |
| -2.222 | 0.039 | 19.000 | 0.504 | 0.476 | 6.112 |
| -1.543 | 0.139 | 19.000 | 0.497 | 0.476 | 6.112 |
| 0.034  | 0.973 | 19.000 | 0.406 | 0.476 | 6.112 |
| 1.237  | 0.231 | 19.000 | 0.389 | 0.476 | 6.112 |
| -0.773 | 0.449 | 19.000 | 0.756 | 0.476 | 6.112 |
| -0.937 | 0.361 | 19.000 | 0.690 | 0.476 | 6.112 |
| 0.398  | 0.695 | 19.000 | 0.489 | 0.476 | 6.112 |
| 2.362  | 0.029 | 19.000 | 0.820 | 0.476 | 6.112 |
| 1.893  | 0.074 | 19.000 | 0.620 | 0.476 | 6.112 |
| 2.490  | 0.022 | 19.000 | 0.420 | 0.476 | 6.112 |
| 2.136  | 0.046 | 19.000 | 0.459 | 0.476 | 6.112 |
| 1.881  | 0.075 | 19.000 | 0.282 | 0.476 | 6.112 |
| 1.108  | 0.282 | 19.000 | 0.722 | 0.476 | 6.112 |
| 2.206  | 0.040 | 19.000 | 0.333 | 0.476 | 6.112 |
| -1.399 | 0.178 | 19.000 | 0.395 | 0.476 | 6.112 |
| 2.644  | 0.016 | 19.000 | 0.681 | 0.476 | 6.112 |
| 1.772  | 0.092 | 19.000 | 0.479 | 0.476 | 6.112 |
| -1.815 | 0.085 | 19.000 | 0.356 | 0.476 | 6.112 |
| -0.595 | 0.559 | 19.000 | 0.470 | 0.476 | 6.112 |
| 0.086  | 0.932 | 19.000 | 0.431 | 0.476 | 6.112 |
| -0.370 | 0.716 | 19.000 | 0.450 | 0.476 | 6.112 |
| 0.533  | 0.600 | 19.000 | 0.288 | 0.476 | 6.112 |
| 0.571  | 0.575 | 19.000 | 0.521 | 0.476 | 6.112 |
| -1.639 | 0.118 | 19.000 | 0.343 | 0.476 | 6.112 |
| -0.026 | 0.979 | 19.000 | 0.371 | 0.476 | 6.112 |
| -1.577 | 0.131 | 19.000 | 0.772 | 0.476 | 6.112 |
| 0.573  | 0.574 | 19.000 | 0.557 | 0.476 | 6.112 |
| 1.790  | 0.089 | 19.000 | 0.398 | 0.476 | 6.112 |
| -2.254 | 0.036 | 19.000 | 0.631 | 0.476 | 6.112 |
| -2.417 | 0.026 | 19.000 | 0.650 | 0.476 | 6.112 |
| 0.239  | 0.813 | 19.000 | 0.411 | 0.476 | 6.112 |
| 0.389  | 0.702 | 19.000 | 0.433 | 0.476 | 6.112 |

|        |       |        |       |       |       |
|--------|-------|--------|-------|-------|-------|
| 0.946  | 0.356 | 19.000 | 0.331 | 0.476 | 6.112 |
| -0.303 | 0.766 | 19.000 | 0.299 | 0.476 | 6.112 |
| 2.594  | 0.018 | 19.000 | 0.357 | 0.476 | 6.112 |
| -2.009 | 0.059 | 19.000 | 0.624 | 0.476 | 6.112 |
| -3.105 | 0.006 | 19.000 | 0.357 | 0.476 | 6.112 |
| 2.181  | 0.042 | 19.000 | 0.247 | 0.476 | 6.112 |
| -0.333 | 0.743 | 19.000 | 0.685 | 0.476 | 6.112 |
| -0.968 | 0.345 | 19.000 | 0.683 | 0.476 | 6.112 |
| 0.138  | 0.892 | 19.000 | 0.827 | 0.476 | 6.112 |
| -0.997 | 0.331 | 19.000 | 0.688 | 0.476 | 6.112 |
| -1.888 | 0.074 | 19.000 | 0.601 | 0.476 | 6.112 |
| -0.007 | 0.994 | 19.000 | 0.658 | 0.476 | 6.112 |
| -1.422 | 0.171 | 19.000 | 0.505 | 0.476 | 6.112 |
| -1.366 | 0.188 | 19.000 | 0.731 | 0.476 | 6.112 |
| -0.699 | 0.493 | 19.000 | 0.665 | 0.476 | 6.112 |
| 0.953  | 0.352 | 19.000 | 0.349 | 0.476 | 6.112 |
| 1.514  | 0.146 | 19.000 | 0.470 | 0.476 | 6.112 |
| 1.253  | 0.226 | 19.000 | 0.427 | 0.476 | 6.112 |
| 1.907  | 0.072 | 19.000 | 0.434 | 0.476 | 6.112 |
| -0.759 | 0.457 | 19.000 | 0.585 | 0.476 | 6.112 |
| -1.942 | 0.067 | 19.000 | 0.378 | 0.476 | 6.112 |
| 0.211  | 0.835 | 19.000 | 0.314 | 0.476 | 6.112 |
| -2.050 | 0.054 | 19.000 | 0.711 | 0.476 | 6.112 |
| -2.148 | 0.045 | 19.000 | 0.807 | 0.476 | 6.112 |
| -0.365 | 0.719 | 19.000 | 0.496 | 0.476 | 6.112 |
| 0.527  | 0.604 | 19.000 | 0.405 | 0.476 | 6.112 |
| -1.418 | 0.172 | 19.000 | 0.408 | 0.476 | 6.112 |
| -2.744 | 0.013 | 19.000 | 0.541 | 0.476 | 6.112 |
| -0.461 | 0.650 | 19.000 | 0.443 | 0.476 | 6.112 |
| -1.533 | 0.142 | 19.000 | 0.371 | 0.476 | 6.112 |
| 1.591  | 0.128 | 19.000 | 0.390 | 0.476 | 6.112 |
| 1.120  | 0.276 | 19.000 | 0.365 | 0.476 | 6.112 |
| -2.371 | 0.028 | 19.000 | 0.437 | 0.476 | 6.112 |
| -2.930 | 0.009 | 19.000 | 0.415 | 0.476 | 6.112 |
| 1.979  | 0.062 | 19.000 | 0.526 | 0.476 | 6.112 |
| -1.839 | 0.082 | 19.000 | 0.598 | 0.476 | 6.112 |
| -1.107 | 0.282 | 19.000 | 0.427 | 0.476 | 6.112 |
| 1.632  | 0.119 | 19.000 | 1.227 | 0.476 | 6.112 |
| 2.471  | 0.023 | 19.000 | 0.658 | 0.476 | 6.112 |
| 2.577  | 0.018 | 19.000 | 0.759 | 0.476 | 6.112 |
| -0.900 | 0.380 | 19.000 | 0.521 | 0.476 | 6.112 |
| -3.104 | 0.006 | 19.000 | 0.819 | 0.476 | 6.112 |
| -2.671 | 0.015 | 19.000 | 0.644 | 0.476 | 6.112 |
| -2.353 | 0.030 | 19.000 | 1.002 | 0.476 | 6.112 |
| -1.790 | 0.089 | 19.000 | 0.742 | 0.476 | 6.112 |
| 1.405  | 0.176 | 19.000 | 0.527 | 0.476 | 6.112 |
| 1.663  | 0.113 | 19.000 | 0.295 | 0.476 | 6.112 |
| 2.213  | 0.039 | 19.000 | 0.542 | 0.476 | 6.112 |
| -2.693 | 0.014 | 19.000 | 0.476 | 0.476 | 6.112 |
| 1.340  | 0.196 | 19.000 | 0.558 | 0.476 | 6.112 |

|        |       |        |       |       |       |
|--------|-------|--------|-------|-------|-------|
| 2.863  | 0.010 | 19.000 | 1.119 | 0.476 | 6.112 |
| -1.231 | 0.233 | 19.000 | 0.602 | 0.476 | 6.112 |
| 1.079  | 0.294 | 19.000 | 0.635 | 0.476 | 6.112 |
| 1.123  | 0.275 | 19.000 | 0.426 | 0.476 | 6.112 |
| 0.743  | 0.466 | 19.000 | 0.410 | 0.476 | 6.112 |
| -1.938 | 0.068 | 19.000 | 0.772 | 0.476 | 6.112 |
| -0.589 | 0.563 | 19.000 | 0.455 | 0.476 | 6.112 |
| -0.155 | 0.879 | 19.000 | 0.532 | 0.476 | 6.112 |
| 1.586  | 0.129 | 19.000 | 0.308 | 0.476 | 6.112 |
| 1.524  | 0.144 | 19.000 | 0.329 | 0.476 | 6.112 |
| -0.451 | 0.657 | 19.000 | 0.468 | 0.476 | 6.112 |
| -2.487 | 0.022 | 19.000 | 0.421 | 0.476 | 6.112 |
| -2.582 | 0.018 | 19.000 | 0.466 | 0.476 | 6.112 |
| 2.630  | 0.016 | 19.000 | 0.328 | 0.476 | 6.112 |
| 1.592  | 0.128 | 19.000 | 0.670 | 0.476 | 6.112 |
| 0.665  | 0.514 | 19.000 | 0.470 | 0.476 | 6.112 |
| 0.293  | 0.773 | 19.000 | 0.326 | 0.476 | 6.112 |
| -1.641 | 0.117 | 19.000 | 0.452 | 0.476 | 6.112 |
| 1.296  | 0.210 | 19.000 | 0.300 | 0.476 | 6.112 |
| 1.619  | 0.122 | 19.000 | 0.401 | 0.476 | 6.112 |
| 1.688  | 0.108 | 19.000 | 0.415 | 0.476 | 6.112 |
| 1.131  | 0.272 | 19.000 | 0.900 | 0.476 | 6.112 |
| 0.544  | 0.593 | 19.000 | 0.409 | 0.476 | 6.112 |
| -2.113 | 0.048 | 19.000 | 0.490 | 0.476 | 6.112 |
| 2.602  | 0.018 | 19.000 | 0.399 | 0.476 | 6.112 |
| 1.013  | 0.324 | 19.000 | 0.359 | 0.476 | 6.112 |
| 0.601  | 0.555 | 19.000 | 0.530 | 0.476 | 6.112 |
| -1.958 | 0.065 | 19.000 | 0.718 | 0.476 | 6.112 |
| -0.724 | 0.478 | 19.000 | 0.384 | 0.476 | 6.112 |
| 1.159  | 0.261 | 19.000 | 0.598 | 0.476 | 6.112 |
| -2.296 | 0.033 | 19.000 | 0.351 | 0.476 | 6.112 |
| 2.160  | 0.044 | 19.000 | 0.460 | 0.476 | 6.112 |
| 1.160  | 0.260 | 19.000 | 0.439 | 0.476 | 6.112 |
| -1.745 | 0.097 | 19.000 | 0.589 | 0.476 | 6.112 |
| 1.741  | 0.098 | 19.000 | 0.726 | 0.476 | 6.112 |
| 2.395  | 0.027 | 19.000 | 0.487 | 0.476 | 6.112 |
| 1.651  | 0.115 | 19.000 | 0.286 | 0.476 | 6.112 |
| 1.708  | 0.104 | 19.000 | 0.378 | 0.476 | 6.112 |
| 0.551  | 0.588 | 19.000 | 0.490 | 0.476 | 6.112 |
| -2.298 | 0.033 | 19.000 | 0.803 | 0.476 | 6.112 |
| -0.406 | 0.689 | 19.000 | 0.391 | 0.476 | 6.112 |
| 0.151  | 0.882 | 19.000 | 0.476 | 0.476 | 6.112 |
| 0.437  | 0.667 | 19.000 | 0.750 | 0.476 | 6.112 |
| 1.264  | 0.221 | 19.000 | 0.916 | 0.476 | 6.112 |
| 1.407  | 0.176 | 19.000 | 0.480 | 0.476 | 6.112 |
| -1.807 | 0.087 | 19.000 | 0.396 | 0.476 | 6.112 |
| 1.449  | 0.164 | 19.000 | 0.440 | 0.476 | 6.112 |
| -3.210 | 0.005 | 19.000 | 0.484 | 0.476 | 6.112 |
| -1.940 | 0.067 | 19.000 | 0.429 | 0.476 | 6.112 |
| -0.404 | 0.691 | 19.000 | 0.457 | 0.476 | 6.112 |

|        |       |        |       |       |       |
|--------|-------|--------|-------|-------|-------|
| 0.657  | 0.519 | 19.000 | 0.198 | 0.476 | 6.112 |
| 1.528  | 0.143 | 19.000 | 0.753 | 0.476 | 6.112 |
| 1.436  | 0.167 | 19.000 | 0.304 | 0.476 | 6.112 |
| 0.824  | 0.420 | 19.000 | 0.361 | 0.476 | 6.112 |
| -2.513 | 0.021 | 19.000 | 0.856 | 0.476 | 6.112 |
| 1.276  | 0.217 | 19.000 | 0.504 | 0.476 | 6.112 |
| 2.726  | 0.013 | 19.000 | 0.346 | 0.476 | 6.112 |
| 1.336  | 0.197 | 19.000 | 0.404 | 0.476 | 6.112 |
| 0.401  | 0.693 | 19.000 | 0.305 | 0.476 | 6.112 |
| 0.174  | 0.864 | 19.000 | 0.491 | 0.476 | 6.112 |
| 0.878  | 0.391 | 19.000 | 0.467 | 0.476 | 6.112 |
| 1.961  | 0.065 | 19.000 | 0.600 | 0.476 | 6.112 |
| 0.551  | 0.588 | 19.000 | 0.445 | 0.476 | 6.112 |
| -2.504 | 0.022 | 19.000 | 0.453 | 0.476 | 6.112 |
| -0.974 | 0.342 | 19.000 | 0.653 | 0.476 | 6.112 |
| -1.954 | 0.066 | 19.000 | 0.646 | 0.476 | 6.112 |
| -1.902 | 0.072 | 19.000 | 0.743 | 0.476 | 6.112 |
| -2.015 | 0.058 | 19.000 | 0.685 | 0.476 | 6.112 |
| -1.311 | 0.206 | 19.000 | 0.455 | 0.476 | 6.112 |
| 0.824  | 0.420 | 19.000 | 0.421 | 0.476 | 6.112 |
| 2.727  | 0.013 | 19.000 | 0.403 | 0.476 | 6.112 |
| 1.299  | 0.209 | 19.000 | 0.547 | 0.476 | 6.112 |
| -0.912 | 0.373 | 19.000 | 0.695 | 0.476 | 6.112 |
| -0.182 | 0.857 | 19.000 | 0.393 | 0.476 | 6.112 |
| -0.009 | 0.993 | 19.000 | 0.544 | 0.476 | 6.112 |
| -1.080 | 0.294 | 19.000 | 0.816 | 0.476 | 6.112 |
| 2.442  | 0.025 | 19.000 | 0.341 | 0.476 | 6.112 |
| -2.053 | 0.054 | 19.000 | 0.635 | 0.476 | 6.112 |
| 1.952  | 0.066 | 19.000 | 0.254 | 0.476 | 6.112 |
| -1.417 | 0.173 | 19.000 | 0.619 | 0.476 | 6.112 |
| 1.933  | 0.068 | 19.000 | 0.337 | 0.476 | 6.112 |
| 2.451  | 0.024 | 19.000 | 0.408 | 0.476 | 6.112 |
| -2.058 | 0.054 | 19.000 | 0.956 | 0.476 | 6.112 |
| -0.345 | 0.734 | 19.000 | 0.411 | 0.476 | 6.112 |
| -0.381 | 0.707 | 19.000 | 0.703 | 0.476 | 6.112 |
| 0.101  | 0.921 | 19.000 | 0.460 | 0.476 | 6.112 |
| -1.367 | 0.187 | 19.000 | 0.338 | 0.476 | 6.112 |
| 1.896  | 0.073 | 19.000 | 0.694 | 0.476 | 6.112 |
| 1.200  | 0.245 | 19.000 | 0.439 | 0.476 | 6.112 |
| 0.963  | 0.348 | 19.000 | 0.432 | 0.476 | 6.112 |
| -1.670 | 0.111 | 19.000 | 0.446 | 0.476 | 6.112 |
| 1.195  | 0.247 | 19.000 | 0.413 | 0.476 | 6.112 |
| 2.010  | 0.059 | 19.000 | 0.527 | 0.476 | 6.112 |
| 0.141  | 0.890 | 19.000 | 0.610 | 0.476 | 6.112 |
| -0.407 | 0.689 | 19.000 | 0.617 | 0.476 | 6.112 |
| 0.217  | 0.830 | 19.000 | 0.541 | 0.476 | 6.112 |
| -1.719 | 0.102 | 19.000 | 0.328 | 0.476 | 6.112 |
| -0.505 | 0.619 | 19.000 | 0.820 | 0.476 | 6.112 |
| -1.453 | 0.162 | 19.000 | 0.559 | 0.476 | 6.112 |
| 2.076  | 0.052 | 19.000 | 0.458 | 0.476 | 6.112 |



|        |       |        |       |       |       |
|--------|-------|--------|-------|-------|-------|
| -0.528 | 0.604 | 19.000 | 0.711 | 0.476 | 6.112 |
| 0.694  | 0.496 | 19.000 | 0.495 | 0.476 | 6.112 |
| -0.707 | 0.488 | 19.000 | 0.342 | 0.476 | 6.112 |
| -0.417 | 0.681 | 19.000 | 0.594 | 0.476 | 6.112 |
| -1.117 | 0.278 | 19.000 | 0.292 | 0.476 | 6.112 |
| -0.119 | 0.907 | 19.000 | 0.506 | 0.476 | 6.112 |
| 2.543  | 0.020 | 19.000 | 0.404 | 0.476 | 6.112 |
| 3.118  | 0.006 | 19.000 | 0.477 | 0.476 | 6.112 |
| -2.341 | 0.030 | 19.000 | 0.821 | 0.476 | 6.112 |
| -2.080 | 0.051 | 19.000 | 0.466 | 0.476 | 6.112 |
| -3.666 | 0.002 | 19.000 | 0.233 | 0.476 | 6.112 |
| 1.876  | 0.076 | 19.000 | 0.381 | 0.476 | 6.112 |
| 1.109  | 0.281 | 19.000 | 0.427 | 0.476 | 6.112 |
| 0.997  | 0.331 | 19.000 | 0.366 | 0.476 | 6.112 |
| 0.493  | 0.627 | 19.000 | 0.410 | 0.476 | 6.112 |
| 0.175  | 0.863 | 19.000 | 0.399 | 0.476 | 6.112 |
| -1.965 | 0.064 | 19.000 | 0.422 | 0.476 | 6.112 |
| -0.513 | 0.614 | 19.000 | 0.469 | 0.476 | 6.112 |
| 2.248  | 0.037 | 19.000 | 0.344 | 0.476 | 6.112 |
| -0.029 | 0.977 | 19.000 | 0.594 | 0.476 | 6.112 |
| 2.143  | 0.045 | 19.000 | 0.332 | 0.476 | 6.112 |
| 2.276  | 0.035 | 19.000 | 0.506 | 0.476 | 6.112 |
| 2.220  | 0.039 | 19.000 | 0.319 | 0.476 | 6.112 |
| 2.901  | 0.009 | 19.000 | 0.231 | 0.476 | 6.112 |
| 1.747  | 0.097 | 19.000 | 0.310 | 0.476 | 6.112 |
| 3.583  | 0.002 | 19.000 | 0.512 | 0.476 | 6.112 |
| 1.321  | 0.202 | 19.000 | 0.523 | 0.476 | 6.112 |
| -0.253 | 0.803 | 19.000 | 0.468 | 0.476 | 6.112 |
| -0.587 | 0.564 | 19.000 | 0.458 | 0.476 | 6.112 |
| -1.752 | 0.096 | 19.000 | 0.456 | 0.476 | 6.112 |
| -2.687 | 0.015 | 19.000 | 0.724 | 0.476 | 6.112 |
| -1.196 | 0.246 | 19.000 | 0.387 | 0.476 | 6.112 |
| -1.565 | 0.134 | 19.000 | 0.689 | 0.476 | 6.112 |
| 0.801  | 0.433 | 19.000 | 0.492 | 0.476 | 6.112 |
| -1.177 | 0.254 | 19.000 | 0.581 | 0.476 | 6.112 |
| -2.259 | 0.036 | 19.000 | 0.406 | 0.476 | 6.112 |
| 0.025  | 0.981 | 19.000 | 0.397 | 0.476 | 6.112 |
| 0.724  | 0.478 | 19.000 | 0.475 | 0.476 | 6.112 |
| 1.527  | 0.143 | 19.000 | 0.444 | 0.476 | 6.112 |
| -0.586 | 0.565 | 19.000 | 0.424 | 0.476 | 6.112 |
| 2.071  | 0.052 | 19.000 | 0.494 | 0.476 | 6.112 |
| -0.230 | 0.821 | 19.000 | 0.297 | 0.476 | 6.112 |
| -1.617 | 0.122 | 19.000 | 0.728 | 0.476 | 6.112 |
| 2.224  | 0.038 | 19.000 | 0.464 | 0.476 | 6.112 |
| -1.648 | 0.116 | 19.000 | 0.445 | 0.476 | 6.112 |
| 0.939  | 0.360 | 19.000 | 0.646 | 0.476 | 6.112 |
| 0.041  | 0.968 | 19.000 | 0.393 | 0.476 | 6.112 |
| 0.761  | 0.456 | 19.000 | 0.504 | 0.476 | 6.112 |
| -2.476 | 0.023 | 19.000 | 0.445 | 0.476 | 6.112 |
| 0.717  | 0.482 | 19.000 | 0.692 | 0.476 | 6.112 |

|        |       |        |       |       |       |
|--------|-------|--------|-------|-------|-------|
| -0.234 | 0.818 | 19.000 | 0.484 | 0.476 | 6.112 |
| 2.585  | 0.018 | 19.000 | 0.598 | 0.476 | 6.112 |
| -0.407 | 0.689 | 19.000 | 0.456 | 0.476 | 6.112 |
| -2.264 | 0.035 | 19.000 | 0.591 | 0.476 | 6.112 |
| -1.238 | 0.231 | 19.000 | 0.479 | 0.476 | 6.112 |
| 2.375  | 0.028 | 19.000 | 0.327 | 0.476 | 6.112 |
| -2.549 | 0.020 | 19.000 | 0.443 | 0.476 | 6.112 |
| -0.334 | 0.742 | 19.000 | 0.291 | 0.476 | 6.112 |
| -1.084 | 0.292 | 19.000 | 0.533 | 0.476 | 6.112 |
| -1.319 | 0.203 | 19.000 | 0.985 | 0.476 | 6.112 |
| -2.750 | 0.013 | 19.000 | 0.402 | 0.476 | 6.112 |
| -0.537 | 0.597 | 19.000 | 0.437 | 0.476 | 6.112 |
| -0.990 | 0.335 | 19.000 | 0.272 | 0.476 | 6.112 |
| 2.034  | 0.056 | 19.000 | 0.666 | 0.476 | 6.112 |
| 1.134  | 0.271 | 19.000 | 0.421 | 0.476 | 6.112 |
| 0.472  | 0.642 | 19.000 | 0.478 | 0.476 | 6.112 |
| 2.657  | 0.016 | 19.000 | 0.404 | 0.476 | 6.112 |
| 0.207  | 0.838 | 19.000 | 0.497 | 0.476 | 6.112 |
| 0.518  | 0.610 | 19.000 | 0.512 | 0.476 | 6.112 |
| -0.921 | 0.368 | 19.000 | 0.724 | 0.476 | 6.112 |
| 1.835  | 0.082 | 19.000 | 0.683 | 0.476 | 6.112 |
| 1.328  | 0.200 | 19.000 | 0.481 | 0.476 | 6.112 |
| -1.645 | 0.116 | 19.000 | 0.568 | 0.476 | 6.112 |
| 0.201  | 0.843 | 19.000 | 0.668 | 0.476 | 6.112 |
| 0.312  | 0.758 | 19.000 | 0.468 | 0.476 | 6.112 |
| -0.346 | 0.733 | 19.000 | 0.666 | 0.476 | 6.112 |
| -1.661 | 0.113 | 19.000 | 0.438 | 0.476 | 6.112 |
| 0.656  | 0.520 | 19.000 | 0.516 | 0.476 | 6.112 |
| 0.255  | 0.802 | 19.000 | 0.532 | 0.476 | 6.112 |
| -1.013 | 0.324 | 19.000 | 0.694 | 0.476 | 6.112 |
| -1.640 | 0.117 | 19.000 | 0.533 | 0.476 | 6.112 |
| 1.464  | 0.160 | 19.000 | 0.635 | 0.476 | 6.112 |
| 0.048  | 0.962 | 19.000 | 0.700 | 0.476 | 6.112 |
| 0.244  | 0.810 | 19.000 | 1.183 | 0.476 | 6.112 |
| 0.821  | 0.422 | 19.000 | 1.423 | 0.476 | 6.112 |
| -0.418 | 0.681 | 19.000 | 0.459 | 0.476 | 6.112 |
| -1.588 | 0.129 | 19.000 | 0.451 | 0.476 | 6.112 |
| 2.916  | 0.009 | 19.000 | 1.004 | 0.476 | 6.112 |
| 2.196  | 0.041 | 19.000 | 0.705 | 0.476 | 6.112 |
| 0.448  | 0.659 | 19.000 | 0.404 | 0.476 | 6.112 |
| -1.371 | 0.186 | 19.000 | 0.641 | 0.476 | 6.112 |
| 1.294  | 0.211 | 19.000 | 0.500 | 0.476 | 6.112 |
| -0.609 | 0.550 | 19.000 | 0.495 | 0.476 | 6.112 |
| -0.049 | 0.961 | 19.000 | 0.457 | 0.476 | 6.112 |
| 1.457  | 0.161 | 19.000 | 0.297 | 0.476 | 6.112 |
| 1.271  | 0.219 | 19.000 | 0.420 | 0.476 | 6.112 |
| 0.682  | 0.504 | 19.000 | 0.363 | 0.476 | 6.112 |
| 2.869  | 0.010 | 19.000 | 0.534 | 0.476 | 6.112 |
| -1.101 | 0.284 | 19.000 | 0.580 | 0.476 | 6.112 |
| 0.268  | 0.791 | 19.000 | 0.485 | 0.476 | 6.112 |

|        |       |        |       |       |       |
|--------|-------|--------|-------|-------|-------|
| 0.233  | 0.818 | 19.000 | 0.312 | 0.476 | 6.112 |
| -0.996 | 0.332 | 19.000 | 0.308 | 0.476 | 6.112 |
| -2.085 | 0.051 | 19.000 | 0.349 | 0.476 | 6.112 |
| -1.544 | 0.139 | 19.000 | 0.760 | 0.476 | 6.112 |
| -1.558 | 0.136 | 19.000 | 0.511 | 0.476 | 6.112 |
| -3.408 | 0.003 | 19.000 | 0.477 | 0.476 | 6.112 |
| -0.607 | 0.551 | 19.000 | 0.414 | 0.476 | 6.112 |
| -1.795 | 0.089 | 19.000 | 0.608 | 0.476 | 6.112 |
| 0.369  | 0.716 | 19.000 | 0.542 | 0.476 | 6.112 |
| -2.003 | 0.060 | 19.000 | 0.587 | 0.476 | 6.112 |
| 1.605  | 0.125 | 19.000 | 0.299 | 0.476 | 6.112 |
| 2.000  | 0.060 | 19.000 | 0.357 | 0.476 | 6.112 |
| -1.479 | 0.156 | 19.000 | 0.320 | 0.476 | 6.112 |
| 1.301  | 0.209 | 19.000 | 0.357 | 0.476 | 6.112 |
| -0.963 | 0.347 | 19.000 | 0.504 | 0.476 | 6.112 |
| 1.394  | 0.179 | 19.000 | 0.465 | 0.476 | 6.112 |
| 0.257  | 0.800 | 19.000 | 0.351 | 0.476 | 6.112 |
| -1.067 | 0.299 | 19.000 | 0.350 | 0.476 | 6.112 |
| 1.321  | 0.202 | 19.000 | 0.660 | 0.476 | 6.112 |
| 1.629  | 0.120 | 19.000 | 0.324 | 0.476 | 6.112 |
| -0.180 | 0.859 | 19.000 | 0.591 | 0.476 | 6.112 |
| 2.544  | 0.020 | 19.000 | 0.605 | 0.476 | 6.112 |
| 1.263  | 0.222 | 19.000 | 1.086 | 0.476 | 6.112 |
| 3.622  | 0.002 | 19.000 | 0.425 | 0.476 | 6.112 |
| -1.262 | 0.222 | 19.000 | 0.610 | 0.476 | 6.112 |
| 0.351  | 0.730 | 19.000 | 0.409 | 0.476 | 6.112 |
| -1.819 | 0.085 | 19.000 | 0.643 | 0.476 | 6.112 |
| -2.657 | 0.016 | 19.000 | 0.326 | 0.476 | 6.112 |
| -2.300 | 0.033 | 19.000 | 0.799 | 0.476 | 6.112 |
| 3.332  | 0.004 | 19.000 | 0.333 | 0.476 | 6.112 |
| 0.694  | 0.496 | 19.000 | 0.293 | 0.476 | 6.112 |
| 2.084  | 0.051 | 19.000 | 0.311 | 0.476 | 6.112 |
| 2.041  | 0.055 | 19.000 | 0.337 | 0.476 | 6.112 |
| 1.988  | 0.061 | 19.000 | 0.516 | 0.476 | 6.112 |
| -2.280 | 0.034 | 19.000 | 0.478 | 0.476 | 6.112 |
| -2.164 | 0.043 | 19.000 | 0.375 | 0.476 | 6.112 |
| -0.213 | 0.833 | 19.000 | 0.622 | 0.476 | 6.112 |
| 0.356  | 0.726 | 19.000 | 0.365 | 0.476 | 6.112 |
| 1.727  | 0.100 | 19.000 | 0.382 | 0.476 | 6.112 |
| -0.462 | 0.649 | 19.000 | 0.438 | 0.476 | 6.112 |
| -1.760 | 0.095 | 19.000 | 0.408 | 0.476 | 6.112 |
| 1.952  | 0.066 | 19.000 | 1.029 | 0.476 | 6.112 |
| 1.822  | 0.084 | 19.000 | 0.495 | 0.476 | 6.112 |
| -1.910 | 0.071 | 19.000 | 0.735 | 0.476 | 6.112 |
| 1.191  | 0.248 | 19.000 | 0.368 | 0.476 | 6.112 |
| -0.926 | 0.366 | 19.000 | 0.499 | 0.476 | 6.112 |
| 1.413  | 0.174 | 19.000 | 0.589 | 0.476 | 6.112 |
| -1.038 | 0.312 | 19.000 | 0.291 | 0.476 | 6.112 |
| 1.519  | 0.145 | 19.000 | 0.317 | 0.476 | 6.112 |
| -0.397 | 0.696 | 19.000 | 0.341 | 0.476 | 6.112 |

|        |       |        |       |       |       |
|--------|-------|--------|-------|-------|-------|
| 2.056  | 0.054 | 19.000 | 0.509 | 0.476 | 6.112 |
| -2.373 | 0.028 | 19.000 | 0.682 | 0.476 | 6.112 |
| 3.665  | 0.002 | 19.000 | 0.266 | 0.476 | 6.112 |
| -1.328 | 0.200 | 19.000 | 0.437 | 0.476 | 6.112 |
| 0.231  | 0.820 | 19.000 | 0.388 | 0.476 | 6.112 |
| 2.383  | 0.028 | 19.000 | 0.572 | 0.476 | 6.112 |
| 2.509  | 0.021 | 19.000 | 0.410 | 0.476 | 6.112 |
| 1.238  | 0.231 | 19.000 | 0.365 | 0.476 | 6.112 |
| 1.457  | 0.161 | 19.000 | 0.329 | 0.476 | 6.112 |
| 0.133  | 0.895 | 19.000 | 0.455 | 0.476 | 6.112 |
| -1.181 | 0.252 | 19.000 | 0.617 | 0.476 | 6.112 |
| -2.097 | 0.050 | 19.000 | 0.553 | 0.476 | 6.112 |
| 1.796  | 0.088 | 19.000 | 0.587 | 0.476 | 6.112 |
| 1.348  | 0.194 | 19.000 | 0.342 | 0.476 | 6.112 |
| 2.067  | 0.053 | 19.000 | 0.327 | 0.476 | 6.112 |
| -1.130 | 0.273 | 19.000 | 0.505 | 0.476 | 6.112 |
| 2.779  | 0.012 | 19.000 | 0.292 | 0.476 | 6.112 |
| 0.816  | 0.425 | 19.000 | 0.257 | 0.476 | 6.112 |
| 0.285  | 0.778 | 19.000 | 0.390 | 0.476 | 6.112 |
| 0.017  | 0.986 | 19.000 | 0.467 | 0.476 | 6.112 |
| 0.409  | 0.687 | 19.000 | 0.410 | 0.476 | 6.112 |
| -0.332 | 0.743 | 19.000 | 0.448 | 0.476 | 6.112 |
| 3.255  | 0.004 | 19.000 | 0.356 | 0.476 | 6.112 |
| 0.548  | 0.590 | 19.000 | 0.383 | 0.476 | 6.112 |
| -0.917 | 0.371 | 19.000 | 0.414 | 0.476 | 6.112 |
| 1.156  | 0.262 | 19.000 | 0.481 | 0.476 | 6.112 |
| 1.190  | 0.249 | 19.000 | 0.554 | 0.476 | 6.112 |
| 3.047  | 0.007 | 19.000 | 0.449 | 0.476 | 6.112 |
| -0.072 | 0.943 | 19.000 | 0.428 | 0.476 | 6.112 |
| -0.098 | 0.923 | 19.000 | 0.391 | 0.476 | 6.112 |
| 2.152  | 0.044 | 19.000 | 0.329 | 0.476 | 6.112 |
| -1.396 | 0.179 | 19.000 | 0.447 | 0.476 | 6.112 |
| 2.457  | 0.024 | 19.000 | 0.305 | 0.476 | 6.112 |
| 1.671  | 0.111 | 19.000 | 1.068 | 0.476 | 6.112 |
| 2.794  | 0.012 | 19.000 | 0.739 | 0.476 | 6.112 |
| 0.646  | 0.526 | 19.000 | 0.352 | 0.476 | 6.112 |
| -0.897 | 0.381 | 19.000 | 0.544 | 0.476 | 6.112 |
| -2.545 | 0.020 | 19.000 | 0.435 | 0.476 | 6.112 |
| -0.997 | 0.331 | 19.000 | 0.390 | 0.476 | 6.112 |
| -2.192 | 0.041 | 19.000 | 0.676 | 0.476 | 6.112 |
| -3.601 | 0.002 | 19.000 | 0.522 | 0.476 | 6.112 |
| -1.504 | 0.149 | 19.000 | 1.028 | 0.476 | 6.112 |
| 0.134  | 0.895 | 19.000 | 0.500 | 0.476 | 6.112 |
| -1.286 | 0.214 | 19.000 | 0.715 | 0.476 | 6.112 |
| 0.940  | 0.359 | 19.000 | 0.332 | 0.476 | 6.112 |
| 1.355  | 0.191 | 19.000 | 0.864 | 0.476 | 6.112 |
| -1.061 | 0.302 | 19.000 | 0.834 | 0.476 | 6.112 |
| -0.039 | 0.969 | 19.000 | 2.189 | 0.476 | 6.112 |
| -1.444 | 0.165 | 19.000 | 0.338 | 0.476 | 6.112 |
| -2.534 | 0.020 | 19.000 | 0.690 | 0.476 | 6.112 |

|        |       |        |       |       |       |
|--------|-------|--------|-------|-------|-------|
| 0.824  | 0.420 | 19.000 | 0.426 | 0.476 | 6.112 |
| 1.444  | 0.165 | 19.000 | 0.452 | 0.476 | 6.112 |
| -1.308 | 0.207 | 19.000 | 0.542 | 0.476 | 6.112 |
| -0.451 | 0.657 | 19.000 | 0.553 | 0.476 | 6.112 |
| 2.118  | 0.048 | 19.000 | 0.666 | 0.476 | 6.112 |
| -0.583 | 0.567 | 19.000 | 0.833 | 0.476 | 6.112 |
| 0.484  | 0.634 | 19.000 | 0.407 | 0.476 | 6.112 |
| -0.401 | 0.693 | 19.000 | 0.479 | 0.476 | 6.112 |
| 0.312  | 0.758 | 19.000 | 0.555 | 0.476 | 6.112 |
| 1.434  | 0.168 | 19.000 | 0.379 | 0.476 | 6.112 |
| 2.193  | 0.041 | 19.000 | 0.616 | 0.476 | 6.112 |
| 1.361  | 0.189 | 19.000 | 0.318 | 0.476 | 6.112 |
| 2.477  | 0.023 | 19.000 | 0.631 | 0.476 | 6.112 |
| 1.082  | 0.293 | 19.000 | 0.447 | 0.476 | 6.112 |
| -0.948 | 0.355 | 19.000 | 0.536 | 0.476 | 6.112 |
| 0.096  | 0.925 | 19.000 | 1.864 | 0.476 | 6.112 |
| 0.073  | 0.942 | 19.000 | 1.740 | 0.476 | 6.112 |
| 1.154  | 0.263 | 19.000 | 0.322 | 0.476 | 6.112 |
| -2.437 | 0.025 | 19.000 | 0.675 | 0.476 | 6.112 |
| -1.164 | 0.259 | 19.000 | 0.364 | 0.476 | 6.112 |
| -0.257 | 0.800 | 19.000 | 0.290 | 0.476 | 6.112 |
| -1.236 | 0.232 | 19.000 | 0.830 | 0.476 | 6.112 |
| -0.902 | 0.378 | 19.000 | 0.763 | 0.476 | 6.112 |
| 0.591  | 0.562 | 19.000 | 0.507 | 0.476 | 6.112 |
| 1.738  | 0.098 | 19.000 | 0.264 | 0.476 | 6.112 |
| 0.798  | 0.435 | 19.000 | 0.321 | 0.476 | 6.112 |
| -1.718 | 0.102 | 19.000 | 0.486 | 0.476 | 6.112 |
| 1.569  | 0.133 | 19.000 | 0.496 | 0.476 | 6.112 |
| -1.688 | 0.108 | 19.000 | 0.424 | 0.476 | 6.112 |
| -1.062 | 0.301 | 19.000 | 0.615 | 0.476 | 6.112 |
| 1.405  | 0.176 | 19.000 | 0.375 | 0.476 | 6.112 |
| -0.695 | 0.495 | 19.000 | 0.445 | 0.476 | 6.112 |
| -1.153 | 0.263 | 19.000 | 0.512 | 0.476 | 6.112 |
| 0.953  | 0.353 | 19.000 | 0.285 | 0.476 | 6.112 |
| 1.638  | 0.118 | 19.000 | 0.362 | 0.476 | 6.112 |
| 1.815  | 0.085 | 19.000 | 0.398 | 0.476 | 6.112 |
| -0.209 | 0.836 | 19.000 | 0.609 | 0.476 | 6.112 |
| 1.833  | 0.082 | 19.000 | 1.003 | 0.476 | 6.112 |
| 1.862  | 0.078 | 19.000 | 0.663 | 0.476 | 6.112 |
| 2.518  | 0.021 | 19.000 | 0.318 | 0.476 | 6.112 |
| -1.497 | 0.151 | 19.000 | 0.543 | 0.476 | 6.112 |
| 1.007  | 0.327 | 19.000 | 0.324 | 0.476 | 6.112 |
| 1.497  | 0.151 | 19.000 | 0.305 | 0.476 | 6.112 |
| 1.227  | 0.235 | 19.000 | 0.273 | 0.476 | 6.112 |
| 1.993  | 0.061 | 19.000 | 0.266 | 0.476 | 6.112 |
| -1.156 | 0.262 | 19.000 | 0.346 | 0.476 | 6.112 |
| 0.524  | 0.607 | 19.000 | 0.527 | 0.476 | 6.112 |
| -0.179 | 0.860 | 19.000 | 0.455 | 0.476 | 6.112 |
| 1.484  | 0.154 | 19.000 | 0.481 | 0.476 | 6.112 |
| 1.743  | 0.098 | 19.000 | 0.412 | 0.476 | 6.112 |

|        |       |        |       |       |       |
|--------|-------|--------|-------|-------|-------|
| 1.582  | 0.130 | 19.000 | 0.274 | 0.476 | 6.112 |
| -0.782 | 0.444 | 19.000 | 0.413 | 0.476 | 6.112 |
| -1.649 | 0.116 | 19.000 | 0.688 | 0.476 | 6.112 |
| -0.240 | 0.813 | 19.000 | 0.484 | 0.476 | 6.112 |
| 1.928  | 0.069 | 19.000 | 0.436 | 0.476 | 6.112 |
| -2.364 | 0.029 | 19.000 | 0.550 | 0.476 | 6.112 |
| 2.441  | 0.025 | 19.000 | 0.296 | 0.476 | 6.112 |
| -2.490 | 0.022 | 19.000 | 0.813 | 0.476 | 6.112 |
| 2.110  | 0.048 | 19.000 | 0.378 | 0.476 | 6.112 |
| 1.840  | 0.081 | 19.000 | 0.344 | 0.476 | 6.112 |
| 0.142  | 0.888 | 19.000 | 0.442 | 0.476 | 6.112 |
| -1.526 | 0.143 | 19.000 | 0.491 | 0.476 | 6.112 |
| 0.171  | 0.866 | 19.000 | 0.603 | 0.476 | 6.112 |
| -1.442 | 0.166 | 19.000 | 0.515 | 0.476 | 6.112 |
| 2.190  | 0.041 | 19.000 | 1.105 | 0.476 | 6.112 |
| 2.399  | 0.027 | 19.000 | 1.139 | 0.476 | 6.112 |
| -2.217 | 0.039 | 19.000 | 0.520 | 0.476 | 6.112 |
| 2.417  | 0.026 | 19.000 | 0.931 | 0.476 | 6.112 |
| -3.123 | 0.006 | 19.000 | 0.477 | 0.476 | 6.112 |
| -2.296 | 0.033 | 19.000 | 0.427 | 0.476 | 6.112 |
| -0.305 | 0.763 | 19.000 | 0.450 | 0.476 | 6.112 |
| 1.928  | 0.069 | 19.000 | 0.938 | 0.476 | 6.112 |
| 1.807  | 0.087 | 19.000 | 0.563 | 0.476 | 6.112 |
| 1.979  | 0.062 | 19.000 | 0.798 | 0.476 | 6.112 |
| -1.229 | 0.234 | 19.000 | 0.395 | 0.476 | 6.112 |
| -0.339 | 0.738 | 19.000 | 0.357 | 0.476 | 6.112 |
| 1.887  | 0.074 | 19.000 | 0.372 | 0.476 | 6.112 |
| 1.635  | 0.119 | 19.000 | 0.481 | 0.476 | 6.112 |
| 1.054  | 0.305 | 19.000 | 0.347 | 0.476 | 6.112 |
| 1.663  | 0.113 | 19.000 | 0.341 | 0.476 | 6.112 |
| 2.843  | 0.010 | 19.000 | 0.211 | 0.476 | 6.112 |
| 1.592  | 0.128 | 19.000 | 0.399 | 0.476 | 6.112 |
| 1.784  | 0.090 | 19.000 | 0.308 | 0.476 | 6.112 |
| 1.233  | 0.233 | 19.000 | 0.432 | 0.476 | 6.112 |
| -2.707 | 0.014 | 19.000 | 0.643 | 0.476 | 6.112 |
| 2.714  | 0.014 | 19.000 | 0.302 | 0.476 | 6.112 |
| 0.657  | 0.519 | 19.000 | 0.454 | 0.476 | 6.112 |
| 0.806  | 0.430 | 19.000 | 0.460 | 0.476 | 6.112 |
| 0.438  | 0.666 | 19.000 | 0.458 | 0.476 | 6.112 |
| 1.411  | 0.174 | 19.000 | 0.517 | 0.476 | 6.112 |
| 3.302  | 0.004 | 19.000 | 0.298 | 0.476 | 6.112 |
| 1.365  | 0.188 | 19.000 | 0.591 | 0.476 | 6.112 |
| 0.526  | 0.605 | 19.000 | 0.385 | 0.476 | 6.112 |
| -0.286 | 0.778 | 19.000 | 0.262 | 0.476 | 6.112 |
| 1.822  | 0.084 | 19.000 | 0.667 | 0.476 | 6.112 |
| 2.032  | 0.056 | 19.000 | 0.219 | 0.476 | 6.112 |
| -2.035 | 0.056 | 19.000 | 0.413 | 0.476 | 6.112 |
| 1.568  | 0.133 | 19.000 | 0.523 | 0.476 | 6.112 |
| -0.846 | 0.408 | 19.000 | 0.372 | 0.476 | 6.112 |
| -3.186 | 0.005 | 19.000 | 0.503 | 0.476 | 6.112 |

|        |       |        |       |       |       |
|--------|-------|--------|-------|-------|-------|
| 0.119  | 0.907 | 19.000 | 2.202 | 0.476 | 6.112 |
| -0.423 | 0.677 | 19.000 | 0.409 | 0.476 | 6.112 |
| 0.289  | 0.776 | 19.000 | 0.324 | 0.476 | 6.112 |
| -1.588 | 0.129 | 19.000 | 0.369 | 0.476 | 6.112 |
| -0.747 | 0.464 | 19.000 | 0.843 | 0.476 | 6.112 |
| -0.123 | 0.903 | 19.000 | 1.952 | 0.476 | 6.112 |
| -0.608 | 0.550 | 19.000 | 0.517 | 0.476 | 6.112 |
| 0.315  | 0.756 | 19.000 | 0.651 | 0.476 | 6.112 |
| 2.070  | 0.052 | 19.000 | 0.265 | 0.476 | 6.112 |
| -1.926 | 0.069 | 19.000 | 0.458 | 0.476 | 6.112 |
| 1.619  | 0.122 | 19.000 | 0.408 | 0.476 | 6.112 |
| -1.285 | 0.214 | 19.000 | 0.337 | 0.476 | 6.112 |
| -1.452 | 0.163 | 19.000 | 0.622 | 0.476 | 6.112 |
| -2.468 | 0.023 | 19.000 | 0.387 | 0.476 | 6.112 |
| -2.835 | 0.011 | 19.000 | 0.394 | 0.476 | 6.112 |
| -2.429 | 0.025 | 19.000 | 0.370 | 0.476 | 6.112 |
| -2.302 | 0.033 | 19.000 | 0.378 | 0.476 | 6.112 |
| -0.135 | 0.894 | 19.000 | 0.704 | 0.476 | 6.112 |
| -1.745 | 0.097 | 19.000 | 0.576 | 0.476 | 6.112 |
| 1.626  | 0.120 | 19.000 | 0.358 | 0.476 | 6.112 |
| -0.942 | 0.358 | 19.000 | 0.493 | 0.476 | 6.112 |
| -0.441 | 0.664 | 19.000 | 0.684 | 0.476 | 6.112 |
| -2.631 | 0.016 | 19.000 | 0.576 | 0.476 | 6.112 |
| -0.869 | 0.396 | 19.000 | 0.475 | 0.476 | 6.112 |
| 0.680  | 0.505 | 19.000 | 0.478 | 0.476 | 6.112 |
| 1.544  | 0.139 | 19.000 | 0.323 | 0.476 | 6.112 |
| 1.059  | 0.303 | 19.000 | 0.340 | 0.476 | 6.112 |
| 0.679  | 0.505 | 19.000 | 0.526 | 0.476 | 6.112 |
| 1.654  | 0.115 | 19.000 | 0.274 | 0.476 | 6.112 |
| -0.797 | 0.435 | 19.000 | 0.979 | 0.476 | 6.112 |
| 0.064  | 0.950 | 19.000 | 0.426 | 0.476 | 6.112 |
| -3.550 | 0.002 | 19.000 | 0.343 | 0.476 | 6.112 |
| 0.623  | 0.540 | 19.000 | 0.690 | 0.476 | 6.112 |
| -1.628 | 0.120 | 19.000 | 0.421 | 0.476 | 6.112 |
| 0.976  | 0.341 | 19.000 | 0.349 | 0.476 | 6.112 |
| -0.091 | 0.928 | 19.000 | 0.536 | 0.476 | 6.112 |
| 1.565  | 0.134 | 19.000 | 0.792 | 0.476 | 6.112 |
| 2.395  | 0.027 | 19.000 | 0.758 | 0.476 | 6.112 |
| -2.255 | 0.036 | 19.000 | 0.480 | 0.476 | 6.112 |
| -0.111 | 0.913 | 19.000 | 0.362 | 0.476 | 6.112 |
| 0.502  | 0.622 | 19.000 | 0.250 | 0.476 | 6.112 |
| -0.639 | 0.530 | 19.000 | 0.857 | 0.476 | 6.112 |
| 0.214  | 0.833 | 19.000 | 0.800 | 0.476 | 6.112 |
| 1.014  | 0.323 | 19.000 | 0.374 | 0.476 | 6.112 |
| 3.050  | 0.007 | 19.000 | 0.420 | 0.476 | 6.112 |
| 1.088  | 0.290 | 19.000 | 0.347 | 0.476 | 6.112 |
| 2.206  | 0.040 | 19.000 | 0.334 | 0.476 | 6.112 |
| 1.832  | 0.083 | 19.000 | 0.270 | 0.476 | 6.112 |
| 1.769  | 0.093 | 19.000 | 0.341 | 0.476 | 6.112 |
| -0.325 | 0.749 | 19.000 | 0.500 | 0.476 | 6.112 |

|        |       |        |       |       |       |
|--------|-------|--------|-------|-------|-------|
| 1.304  | 0.208 | 19.000 | 0.327 | 0.476 | 6.112 |
| -2.460 | 0.024 | 19.000 | 0.658 | 0.476 | 6.112 |
| 1.640  | 0.117 | 19.000 | 0.513 | 0.476 | 6.112 |
| -0.702 | 0.491 | 19.000 | 1.061 | 0.476 | 6.112 |
| 1.922  | 0.070 | 19.000 | 0.898 | 0.476 | 6.112 |
| 1.919  | 0.070 | 19.000 | 1.383 | 0.476 | 6.112 |
| 2.579  | 0.018 | 19.000 | 1.088 | 0.476 | 6.112 |
| 0.919  | 0.369 | 19.000 | 0.313 | 0.476 | 6.112 |
| 1.991  | 0.061 | 19.000 | 0.861 | 0.476 | 6.112 |
| 1.134  | 0.271 | 19.000 | 0.423 | 0.476 | 6.112 |
| -1.350 | 0.193 | 19.000 | 0.409 | 0.476 | 6.112 |
| 1.621  | 0.121 | 19.000 | 0.297 | 0.476 | 6.112 |
| -0.655 | 0.520 | 19.000 | 0.969 | 0.476 | 6.112 |
| 0.116  | 0.909 | 19.000 | 0.496 | 0.476 | 6.112 |
| -0.561 | 0.581 | 19.000 | 0.753 | 0.476 | 6.112 |
| -1.386 | 0.182 | 19.000 | 0.909 | 0.476 | 6.112 |
| -1.349 | 0.193 | 19.000 | 0.603 | 0.476 | 6.112 |
| 1.480  | 0.155 | 19.000 | 0.658 | 0.476 | 6.112 |
| -0.559 | 0.583 | 19.000 | 0.480 | 0.476 | 6.112 |
| -1.167 | 0.258 | 19.000 | 0.478 | 0.476 | 6.112 |
| 1.659  | 0.114 | 19.000 | 0.552 | 0.476 | 6.112 |
| 1.098  | 0.286 | 19.000 | 0.488 | 0.476 | 6.112 |
| 0.875  | 0.392 | 19.000 | 0.496 | 0.476 | 6.112 |
| 2.398  | 0.027 | 19.000 | 0.558 | 0.476 | 6.112 |
| 1.756  | 0.095 | 19.000 | 0.801 | 0.476 | 6.112 |
| -0.026 | 0.980 | 19.000 | 0.447 | 0.476 | 6.112 |
| 0.893  | 0.383 | 19.000 | 0.286 | 0.476 | 6.112 |
| -1.561 | 0.135 | 19.000 | 0.491 | 0.476 | 6.112 |
| 2.888  | 0.009 | 19.000 | 0.508 | 0.476 | 6.112 |
| -2.625 | 0.017 | 19.000 | 0.393 | 0.476 | 6.112 |
| -0.357 | 0.725 | 19.000 | 0.391 | 0.476 | 6.112 |
| -0.404 | 0.691 | 19.000 | 0.644 | 0.476 | 6.112 |
| -1.608 | 0.124 | 19.000 | 0.391 | 0.476 | 6.112 |
| 1.814  | 0.086 | 19.000 | 0.347 | 0.476 | 6.112 |
| 2.909  | 0.009 | 19.000 | 0.369 | 0.476 | 6.112 |
| -0.942 | 0.358 | 19.000 | 0.215 | 0.476 | 6.112 |
| 0.341  | 0.737 | 19.000 | 0.510 | 0.476 | 6.112 |
| -1.863 | 0.078 | 19.000 | 0.282 | 0.476 | 6.112 |
| 2.435  | 0.025 | 19.000 | 1.092 | 0.476 | 6.112 |
| -3.081 | 0.006 | 19.000 | 0.394 | 0.476 | 6.112 |
| -1.628 | 0.120 | 19.000 | 0.354 | 0.476 | 6.112 |
| -2.274 | 0.035 | 19.000 | 0.470 | 0.476 | 6.112 |
| 1.066  | 0.300 | 19.000 | 0.489 | 0.476 | 6.112 |
| -1.105 | 0.283 | 19.000 | 0.441 | 0.476 | 6.112 |
| -0.865 | 0.398 | 19.000 | 0.555 | 0.476 | 6.112 |
| 0.373  | 0.713 | 19.000 | 0.886 | 0.476 | 6.112 |
| 2.494  | 0.022 | 19.000 | 0.596 | 0.476 | 6.112 |
| 1.463  | 0.160 | 19.000 | 0.320 | 0.476 | 6.112 |
| 1.852  | 0.080 | 19.000 | 0.321 | 0.476 | 6.112 |
| 0.805  | 0.431 | 19.000 | 0.325 | 0.476 | 6.112 |



|        |       |        |       |       |       |
|--------|-------|--------|-------|-------|-------|
| 2.439  | 0.025 | 19.000 | 0.342 | 0.476 | 6.112 |
| -2.099 | 0.049 | 19.000 | 0.690 | 0.476 | 6.112 |
| 1.779  | 0.091 | 19.000 | 0.448 | 0.476 | 6.112 |
| -2.587 | 0.018 | 19.000 | 0.668 | 0.476 | 6.112 |
| -0.626 | 0.539 | 19.000 | 0.380 | 0.476 | 6.112 |
| 2.993  | 0.007 | 19.000 | 0.334 | 0.476 | 6.112 |
| -2.167 | 0.043 | 19.000 | 0.477 | 0.476 | 6.112 |
| 0.409  | 0.687 | 19.000 | 0.874 | 0.476 | 6.112 |
| -0.877 | 0.391 | 19.000 | 0.475 | 0.476 | 6.112 |
| 2.558  | 0.019 | 19.000 | 0.251 | 0.476 | 6.112 |
| 0.243  | 0.811 | 19.000 | 0.414 | 0.476 | 6.112 |
| 0.361  | 0.722 | 19.000 | 0.342 | 0.476 | 6.112 |
| -0.447 | 0.660 | 19.000 | 0.980 | 0.476 | 6.112 |
| -1.009 | 0.326 | 19.000 | 0.269 | 0.476 | 6.112 |
| 2.337  | 0.031 | 19.000 | 0.529 | 0.476 | 6.112 |
| -1.560 | 0.135 | 19.000 | 0.611 | 0.476 | 6.112 |
| 2.527  | 0.021 | 19.000 | 1.128 | 0.476 | 6.112 |
| -1.879 | 0.076 | 19.000 | 0.661 | 0.476 | 6.112 |
| 1.091  | 0.289 | 19.000 | 0.280 | 0.476 | 6.112 |
| 2.530  | 0.020 | 19.000 | 0.774 | 0.476 | 6.112 |
| -1.182 | 0.252 | 19.000 | 0.350 | 0.476 | 6.112 |
| -1.044 | 0.310 | 19.000 | 0.397 | 0.476 | 6.112 |
| -0.150 | 0.882 | 19.000 | 0.322 | 0.476 | 6.112 |
| -2.500 | 0.022 | 19.000 | 0.305 | 0.476 | 6.112 |
| 1.524  | 0.144 | 19.000 | 0.574 | 0.476 | 6.112 |
| -0.165 | 0.871 | 19.000 | 0.382 | 0.476 | 6.112 |
| 2.497  | 0.022 | 19.000 | 0.558 | 0.476 | 6.112 |
| 1.334  | 0.198 | 19.000 | 0.589 | 0.476 | 6.112 |
| -0.250 | 0.805 | 19.000 | 0.242 | 0.476 | 6.112 |
| -0.657 | 0.519 | 19.000 | 0.545 | 0.476 | 6.112 |
| 0.151  | 0.881 | 19.000 | 0.488 | 0.476 | 6.112 |
| -2.141 | 0.045 | 19.000 | 0.526 | 0.476 | 6.112 |
| -3.389 | 0.003 | 19.000 | 0.343 | 0.476 | 6.112 |
| 2.055  | 0.054 | 19.000 | 0.514 | 0.476 | 6.112 |
| -0.262 | 0.796 | 19.000 | 0.239 | 0.476 | 6.112 |
| -0.939 | 0.360 | 19.000 | 0.356 | 0.476 | 6.112 |
| 0.580  | 0.569 | 19.000 | 0.538 | 0.476 | 6.112 |
| 0.315  | 0.756 | 19.000 | 0.385 | 0.476 | 6.112 |
| -0.879 | 0.390 | 19.000 | 0.436 | 0.476 | 6.112 |
| -1.538 | 0.140 | 19.000 | 0.550 | 0.476 | 6.112 |
| 0.061  | 0.952 | 19.000 | 3.816 | 0.476 | 6.112 |
| 3.104  | 0.006 | 19.000 | 0.499 | 0.476 | 6.112 |
| 2.578  | 0.018 | 19.000 | 0.770 | 0.476 | 6.112 |
| 1.663  | 0.113 | 19.000 | 0.704 | 0.476 | 6.112 |
| 1.359  | 0.190 | 19.000 | 0.389 | 0.476 | 6.112 |
| 0.676  | 0.507 | 19.000 | 0.525 | 0.476 | 6.112 |
| 1.530  | 0.143 | 19.000 | 0.476 | 0.476 | 6.112 |
| -1.082 | 0.293 | 19.000 | 0.334 | 0.476 | 6.112 |
| 2.104  | 0.049 | 19.000 | 0.438 | 0.476 | 6.112 |
| -1.693 | 0.107 | 19.000 | 0.420 | 0.476 | 6.112 |

|        |       |        |       |       |       |
|--------|-------|--------|-------|-------|-------|
| 1.566  | 0.134 | 19.000 | 0.275 | 0.476 | 6.112 |
| -0.081 | 0.937 | 19.000 | 0.456 | 0.476 | 6.112 |
| 2.448  | 0.024 | 19.000 | 0.441 | 0.476 | 6.112 |
| -1.631 | 0.119 | 19.000 | 0.432 | 0.476 | 6.112 |
| -0.699 | 0.493 | 19.000 | 0.396 | 0.476 | 6.112 |
| -2.006 | 0.059 | 19.000 | 0.382 | 0.476 | 6.112 |
| 0.311  | 0.759 | 19.000 | 0.748 | 0.476 | 6.112 |
| -0.229 | 0.821 | 19.000 | 0.498 | 0.476 | 6.112 |
| 1.007  | 0.327 | 19.000 | 0.475 | 0.476 | 6.112 |
| -3.792 | 0.001 | 19.000 | 0.424 | 0.476 | 6.112 |
| -0.072 | 0.943 | 19.000 | 0.276 | 0.476 | 6.112 |
| 1.090  | 0.289 | 19.000 | 0.289 | 0.476 | 6.112 |
| -2.641 | 0.016 | 19.000 | 0.320 | 0.476 | 6.112 |
| 1.471  | 0.158 | 19.000 | 0.601 | 0.476 | 6.112 |
| 1.299  | 0.209 | 19.000 | 0.514 | 0.476 | 6.112 |
| 0.517  | 0.611 | 19.000 | 0.423 | 0.476 | 6.112 |
| -1.040 | 0.311 | 19.000 | 0.313 | 0.476 | 6.112 |
| -0.350 | 0.730 | 19.000 | 0.314 | 0.476 | 6.112 |
| 0.756  | 0.459 | 19.000 | 0.293 | 0.476 | 6.112 |
| 1.288  | 0.213 | 19.000 | 0.486 | 0.476 | 6.112 |
| 0.907  | 0.376 | 19.000 | 0.383 | 0.476 | 6.112 |
| -1.265 | 0.221 | 19.000 | 0.686 | 0.476 | 6.112 |
| -1.005 | 0.328 | 19.000 | 0.424 | 0.476 | 6.112 |
| 0.087  | 0.932 | 19.000 | 0.659 | 0.476 | 6.112 |
| 1.528  | 0.143 | 19.000 | 0.496 | 0.476 | 6.112 |
| 0.380  | 0.708 | 19.000 | 0.328 | 0.476 | 6.112 |
| 1.872  | 0.077 | 19.000 | 0.415 | 0.476 | 6.112 |
| 1.075  | 0.296 | 19.000 | 0.334 | 0.476 | 6.112 |
| 1.944  | 0.067 | 19.000 | 0.273 | 0.476 | 6.112 |
| 1.819  | 0.085 | 19.000 | 0.529 | 0.476 | 6.112 |
| 1.899  | 0.073 | 19.000 | 0.413 | 0.476 | 6.112 |
| -0.592 | 0.561 | 19.000 | 0.508 | 0.476 | 6.112 |
| 0.478  | 0.638 | 19.000 | 0.326 | 0.476 | 6.112 |
| -0.135 | 0.894 | 19.000 | 0.419 | 0.476 | 6.112 |
| 2.345  | 0.030 | 19.000 | 1.214 | 0.476 | 6.112 |
| -2.708 | 0.014 | 19.000 | 0.300 | 0.476 | 6.112 |
| 2.057  | 0.054 | 19.000 | 0.820 | 0.476 | 6.112 |
| -2.682 | 0.015 | 19.000 | 0.375 | 0.476 | 6.112 |
| -1.179 | 0.253 | 19.000 | 0.779 | 0.476 | 6.112 |
| 0.308  | 0.761 | 19.000 | 0.593 | 0.476 | 6.112 |
| 2.772  | 0.012 | 19.000 | 0.388 | 0.476 | 6.112 |
| -2.742 | 0.013 | 19.000 | 0.482 | 0.476 | 6.112 |
| 0.411  | 0.685 | 19.000 | 0.794 | 0.476 | 6.112 |
| 0.179  | 0.860 | 19.000 | 0.334 | 0.476 | 6.112 |
| 2.826  | 0.011 | 19.000 | 0.280 | 0.476 | 6.112 |
| -2.435 | 0.025 | 19.000 | 0.419 | 0.476 | 6.112 |
| -0.714 | 0.484 | 19.000 | 0.407 | 0.476 | 6.112 |
| -0.751 | 0.462 | 19.000 | 0.551 | 0.476 | 6.112 |
| 0.152  | 0.881 | 19.000 | 0.250 | 0.476 | 6.112 |
| 1.615  | 0.123 | 19.000 | 0.313 | 0.476 | 6.112 |

|        |       |        |       |       |       |
|--------|-------|--------|-------|-------|-------|
| -2.493 | 0.022 | 19.000 | 0.388 | 0.476 | 6.112 |
| 0.521  | 0.609 | 19.000 | 0.410 | 0.476 | 6.112 |
| 1.394  | 0.179 | 19.000 | 0.376 | 0.476 | 6.112 |
| 1.883  | 0.075 | 19.000 | 0.361 | 0.476 | 6.112 |
| -1.010 | 0.325 | 19.000 | 0.340 | 0.476 | 6.112 |
| 2.139  | 0.046 | 19.000 | 0.425 | 0.476 | 6.112 |
| 0.199  | 0.844 | 19.000 | 0.478 | 0.476 | 6.112 |
| -1.468 | 0.158 | 19.000 | 0.454 | 0.476 | 6.112 |
| 0.349  | 0.731 | 19.000 | 1.085 | 0.476 | 6.112 |
| -2.444 | 0.024 | 19.000 | 0.428 | 0.476 | 6.112 |
| -1.005 | 0.327 | 19.000 | 0.355 | 0.476 | 6.112 |
| 2.174  | 0.043 | 19.000 | 0.486 | 0.476 | 6.112 |
| -2.218 | 0.039 | 19.000 | 0.575 | 0.476 | 6.112 |
| -0.958 | 0.350 | 19.000 | 0.423 | 0.476 | 6.112 |
| 0.697  | 0.494 | 19.000 | 0.445 | 0.476 | 6.112 |
| -3.782 | 0.001 | 19.000 | 0.337 | 0.476 | 6.112 |
| -3.159 | 0.005 | 19.000 | 0.568 | 0.476 | 6.112 |
| -1.709 | 0.104 | 19.000 | 0.736 | 0.476 | 6.112 |
| 2.178  | 0.042 | 19.000 | 0.392 | 0.476 | 6.112 |
| 2.267  | 0.035 | 19.000 | 0.422 | 0.476 | 6.112 |
| 2.028  | 0.057 | 19.000 | 0.806 | 0.476 | 6.112 |
| 1.297  | 0.210 | 19.000 | 0.513 | 0.476 | 6.112 |
| -2.472 | 0.023 | 19.000 | 0.463 | 0.476 | 6.112 |
| -0.933 | 0.362 | 19.000 | 0.403 | 0.476 | 6.112 |
| 2.401  | 0.027 | 19.000 | 0.277 | 0.476 | 6.112 |
| 2.110  | 0.048 | 19.000 | 0.309 | 0.476 | 6.112 |
| -1.854 | 0.079 | 19.000 | 0.241 | 0.476 | 6.112 |
| -1.701 | 0.105 | 19.000 | 0.397 | 0.476 | 6.112 |
| 0.990  | 0.335 | 19.000 | 0.393 | 0.476 | 6.112 |
| -0.929 | 0.365 | 19.000 | 0.454 | 0.476 | 6.112 |
| 0.086  | 0.932 | 19.000 | 0.341 | 0.476 | 6.112 |
| 1.652  | 0.115 | 19.000 | 0.811 | 0.476 | 6.112 |
| -1.872 | 0.077 | 19.000 | 0.357 | 0.476 | 6.112 |
| 0.270  | 0.790 | 19.000 | 0.626 | 0.476 | 6.112 |
| 2.520  | 0.021 | 19.000 | 0.692 | 0.476 | 6.112 |
| 0.769  | 0.452 | 19.000 | 0.360 | 0.476 | 6.112 |
| 2.014  | 0.058 | 19.000 | 0.423 | 0.476 | 6.112 |
| 2.365  | 0.029 | 19.000 | 0.510 | 0.476 | 6.112 |
| 0.535  | 0.599 | 19.000 | 0.806 | 0.476 | 6.112 |
| -1.498 | 0.151 | 19.000 | 0.584 | 0.476 | 6.112 |
| 1.186  | 0.250 | 19.000 | 0.463 | 0.476 | 6.112 |
| 1.062  | 0.301 | 19.000 | 0.503 | 0.476 | 6.112 |
| 2.439  | 0.025 | 19.000 | 0.358 | 0.476 | 6.112 |
| -1.859 | 0.079 | 19.000 | 0.486 | 0.476 | 6.112 |
| 1.619  | 0.122 | 19.000 | 0.513 | 0.476 | 6.112 |
| 0.537  | 0.598 | 19.000 | 0.431 | 0.476 | 6.112 |
| 1.561  | 0.135 | 19.000 | 0.442 | 0.476 | 6.112 |
| 1.276  | 0.217 | 19.000 | 0.353 | 0.476 | 6.112 |
| 0.108  | 0.915 | 19.000 | 0.292 | 0.476 | 6.112 |
| 0.481  | 0.636 | 19.000 | 0.531 | 0.476 | 6.112 |

|        |       |        |       |       |       |
|--------|-------|--------|-------|-------|-------|
| -1.385 | 0.182 | 19.000 | 0.685 | 0.476 | 6.112 |
| 1.684  | 0.109 | 19.000 | 0.252 | 0.476 | 6.112 |
| 2.514  | 0.021 | 19.000 | 0.705 | 0.476 | 6.112 |
| -0.360 | 0.723 | 19.000 | 0.434 | 0.476 | 6.112 |
| 0.161  | 0.874 | 19.000 | 0.505 | 0.476 | 6.112 |
| -1.229 | 0.234 | 19.000 | 0.320 | 0.476 | 6.112 |
| -0.852 | 0.405 | 19.000 | 0.261 | 0.476 | 6.112 |
| 0.782  | 0.444 | 19.000 | 0.464 | 0.476 | 6.112 |
| 1.189  | 0.249 | 19.000 | 0.482 | 0.476 | 6.112 |
| -1.757 | 0.095 | 19.000 | 0.435 | 0.476 | 6.112 |
| -0.786 | 0.442 | 19.000 | 0.355 | 0.476 | 6.112 |
| 1.382  | 0.183 | 19.000 | 0.298 | 0.476 | 6.112 |
| -1.677 | 0.110 | 19.000 | 0.351 | 0.476 | 6.112 |
| -0.099 | 0.922 | 19.000 | 0.422 | 0.476 | 6.112 |
| 1.829  | 0.083 | 19.000 | 0.540 | 0.476 | 6.112 |
| 1.486  | 0.154 | 19.000 | 0.381 | 0.476 | 6.112 |
| 0.495  | 0.626 | 19.000 | 0.415 | 0.476 | 6.112 |
| 1.688  | 0.108 | 19.000 | 0.503 | 0.476 | 6.112 |
| 0.911  | 0.374 | 19.000 | 0.398 | 0.476 | 6.112 |
| -0.578 | 0.570 | 19.000 | 0.341 | 0.476 | 6.112 |
| -0.283 | 0.780 | 19.000 | 0.570 | 0.476 | 6.112 |
| 0.558  | 0.583 | 19.000 | 0.340 | 0.476 | 6.112 |
| 2.213  | 0.039 | 19.000 | 0.790 | 0.476 | 6.112 |
| -0.922 | 0.368 | 19.000 | 0.849 | 0.476 | 6.112 |
| 1.927  | 0.069 | 19.000 | 0.480 | 0.476 | 6.112 |
| -0.175 | 0.863 | 19.000 | 0.357 | 0.476 | 6.112 |
| -0.806 | 0.430 | 19.000 | 0.430 | 0.476 | 6.112 |
| 1.380  | 0.183 | 19.000 | 0.432 | 0.476 | 6.112 |
| -0.646 | 0.526 | 19.000 | 0.496 | 0.476 | 6.112 |
| 0.370  | 0.715 | 19.000 | 0.359 | 0.476 | 6.112 |
| -0.255 | 0.802 | 19.000 | 0.388 | 0.476 | 6.112 |
| -0.404 | 0.691 | 19.000 | 0.493 | 0.476 | 6.112 |
| 0.659  | 0.518 | 19.000 | 0.419 | 0.476 | 6.112 |
| 1.606  | 0.125 | 19.000 | 0.582 | 0.476 | 6.112 |
| 0.623  | 0.541 | 19.000 | 0.535 | 0.476 | 6.112 |
| 1.339  | 0.196 | 19.000 | 0.402 | 0.476 | 6.112 |
| -0.047 | 0.963 | 19.000 | 0.410 | 0.476 | 6.112 |
| 0.168  | 0.868 | 19.000 | 0.478 | 0.476 | 6.112 |
| 0.594  | 0.559 | 19.000 | 0.350 | 0.476 | 6.112 |
| 2.426  | 0.025 | 19.000 | 0.478 | 0.476 | 6.112 |
| -0.276 | 0.785 | 19.000 | 0.399 | 0.476 | 6.112 |
| 1.031  | 0.315 | 19.000 | 0.452 | 0.476 | 6.112 |
| 0.418  | 0.681 | 19.000 | 0.546 | 0.476 | 6.112 |
| -0.466 | 0.647 | 19.000 | 0.336 | 0.476 | 6.112 |
| -1.757 | 0.095 | 19.000 | 0.345 | 0.476 | 6.112 |
| 1.133  | 0.272 | 19.000 | 0.522 | 0.476 | 6.112 |
| 0.674  | 0.509 | 19.000 | 0.455 | 0.476 | 6.112 |
| -2.262 | 0.036 | 19.000 | 0.466 | 0.476 | 6.112 |
| -0.545 | 0.592 | 19.000 | 0.381 | 0.476 | 6.112 |
| -0.031 | 0.975 | 19.000 | 0.485 | 0.476 | 6.112 |

|        |       |        |       |       |       |
|--------|-------|--------|-------|-------|-------|
| 0.162  | 0.873 | 19.000 | 0.621 | 0.476 | 6.112 |
| 0.308  | 0.762 | 19.000 | 0.564 | 0.476 | 6.112 |
| -3.205 | 0.005 | 19.000 | 0.387 | 0.476 | 6.112 |
| 0.020  | 0.985 | 19.000 | 0.390 | 0.476 | 6.112 |
| -0.671 | 0.510 | 19.000 | 0.392 | 0.476 | 6.112 |
| 1.599  | 0.126 | 19.000 | 0.381 | 0.476 | 6.112 |
| -0.693 | 0.497 | 19.000 | 0.446 | 0.476 | 6.112 |
| 0.074  | 0.942 | 19.000 | 0.427 | 0.476 | 6.112 |
| 0.093  | 0.927 | 19.000 | 0.325 | 0.476 | 6.112 |
| -0.075 | 0.941 | 19.000 | 0.501 | 0.476 | 6.112 |
| -2.659 | 0.016 | 19.000 | 0.334 | 0.476 | 6.112 |
| 1.453  | 0.163 | 19.000 | 0.329 | 0.476 | 6.112 |
| 1.109  | 0.281 | 19.000 | 0.554 | 0.476 | 6.112 |
| -1.497 | 0.151 | 19.000 | 0.377 | 0.476 | 6.112 |
| 1.572  | 0.133 | 19.000 | 0.479 | 0.476 | 6.112 |
| 0.608  | 0.550 | 19.000 | 0.385 | 0.476 | 6.112 |
| -0.700 | 0.492 | 19.000 | 0.409 | 0.476 | 6.112 |
| 1.733  | 0.099 | 19.000 | 0.295 | 0.476 | 6.112 |
| 1.843  | 0.081 | 19.000 | 0.318 | 0.476 | 6.112 |
| 2.189  | 0.041 | 19.000 | 0.341 | 0.476 | 6.112 |
| 1.308  | 0.207 | 19.000 | 0.375 | 0.476 | 6.112 |
| 0.583  | 0.567 | 19.000 | 0.323 | 0.476 | 6.112 |
| 2.531  | 0.020 | 19.000 | 0.999 | 0.476 | 6.112 |
| 0.515  | 0.612 | 19.000 | 0.472 | 0.476 | 6.112 |
| 0.660  | 0.517 | 19.000 | 0.490 | 0.476 | 6.112 |
| -0.244 | 0.810 | 19.000 | 0.429 | 0.476 | 6.112 |
| -1.668 | 0.112 | 19.000 | 0.427 | 0.476 | 6.112 |
| 0.139  | 0.891 | 19.000 | 0.457 | 0.476 | 6.112 |
| -0.760 | 0.457 | 19.000 | 0.363 | 0.476 | 6.112 |
| -2.148 | 0.045 | 19.000 | 0.333 | 0.476 | 6.112 |
| 1.787  | 0.090 | 19.000 | 0.386 | 0.476 | 6.112 |
| -0.921 | 0.369 | 19.000 | 0.261 | 0.476 | 6.112 |
| 0.916  | 0.371 | 19.000 | 0.446 | 0.476 | 6.112 |
| -0.395 | 0.697 | 19.000 | 0.552 | 0.476 | 6.112 |
| 0.936  | 0.361 | 19.000 | 0.470 | 0.476 | 6.112 |
| 1.506  | 0.148 | 19.000 | 0.444 | 0.476 | 6.112 |
| 0.706  | 0.489 | 19.000 | 0.421 | 0.476 | 6.112 |
| 0.595  | 0.559 | 19.000 | 0.599 | 0.476 | 6.112 |
| 1.072  | 0.297 | 19.000 | 0.587 | 0.476 | 6.112 |
| -1.090 | 0.289 | 19.000 | 0.376 | 0.476 | 6.112 |
| 1.477  | 0.156 | 19.000 | 0.381 | 0.476 | 6.112 |
| 2.029  | 0.057 | 19.000 | 0.322 | 0.476 | 6.112 |
| -3.286 | 0.004 | 19.000 | 0.411 | 0.476 | 6.112 |
| 0.572  | 0.574 | 19.000 | 0.487 | 0.476 | 6.112 |
| 0.577  | 0.571 | 19.000 | 0.406 | 0.476 | 6.112 |
| -1.238 | 0.231 | 19.000 | 0.551 | 0.476 | 6.112 |
| 1.764  | 0.094 | 19.000 | 0.410 | 0.476 | 6.112 |
| -1.116 | 0.278 | 19.000 | 0.579 | 0.476 | 6.112 |
| 1.711  | 0.103 | 19.000 | 0.527 | 0.476 | 6.112 |
| -1.729 | 0.100 | 19.000 | 0.606 | 0.476 | 6.112 |

|        |       |        |       |       |       |
|--------|-------|--------|-------|-------|-------|
| -1.562 | 0.135 | 19.000 | 0.565 | 0.476 | 6.112 |
| 0.411  | 0.686 | 19.000 | 0.365 | 0.476 | 6.112 |
| 1.407  | 0.176 | 19.000 | 0.205 | 0.476 | 6.112 |
| 0.346  | 0.733 | 19.000 | 0.287 | 0.476 | 6.112 |
| -1.297 | 0.210 | 19.000 | 0.498 | 0.476 | 6.112 |
| 0.316  | 0.756 | 19.000 | 0.354 | 0.476 | 6.112 |
| 2.527  | 0.021 | 19.000 | 0.498 | 0.476 | 6.112 |
| -2.730 | 0.013 | 19.000 | 0.371 | 0.476 | 6.112 |
| 0.354  | 0.727 | 19.000 | 0.417 | 0.476 | 6.112 |
| 0.438  | 0.667 | 19.000 | 0.462 | 0.476 | 6.112 |
| -2.247 | 0.037 | 19.000 | 0.681 | 0.476 | 6.112 |
| 0.554  | 0.586 | 19.000 | 0.275 | 0.476 | 6.112 |
| 0.066  | 0.948 | 19.000 | 0.373 | 0.476 | 6.112 |
| -0.198 | 0.846 | 19.000 | 0.527 | 0.476 | 6.112 |
| 3.380  | 0.003 | 19.000 | 0.412 | 0.476 | 6.112 |
| -0.331 | 0.744 | 19.000 | 0.490 | 0.476 | 6.112 |
| 1.406  | 0.176 | 19.000 | 0.370 | 0.476 | 6.112 |
| 0.599  | 0.557 | 19.000 | 0.689 | 0.476 | 6.112 |
| 1.672  | 0.111 | 19.000 | 0.396 | 0.476 | 6.112 |
| -1.020 | 0.320 | 19.000 | 0.406 | 0.476 | 6.112 |
| -0.273 | 0.788 | 19.000 | 0.507 | 0.476 | 6.112 |
| -1.223 | 0.236 | 19.000 | 0.524 | 0.476 | 6.112 |
| -0.633 | 0.535 | 19.000 | 0.556 | 0.476 | 6.112 |
| 0.980  | 0.340 | 19.000 | 0.381 | 0.476 | 6.112 |
| 0.759  | 0.457 | 19.000 | 0.290 | 0.476 | 6.112 |
| 1.169  | 0.257 | 19.000 | 0.447 | 0.476 | 6.112 |
| -0.648 | 0.525 | 19.000 | 0.417 | 0.476 | 6.112 |
| -0.888 | 0.386 | 19.000 | 0.435 | 0.476 | 6.112 |
| -0.605 | 0.552 | 19.000 | 0.406 | 0.476 | 6.112 |
| -0.189 | 0.852 | 19.000 | 0.326 | 0.476 | 6.112 |
| -0.643 | 0.528 | 19.000 | 0.336 | 0.476 | 6.112 |
| 0.835  | 0.414 | 19.000 | 0.351 | 0.476 | 6.112 |
| 1.113  | 0.279 | 19.000 | 0.509 | 0.476 | 6.112 |
| 1.108  | 0.282 | 19.000 | 0.374 | 0.476 | 6.112 |
| 0.620  | 0.542 | 19.000 | 0.479 | 0.476 | 6.112 |
| 0.055  | 0.957 | 19.000 | 0.389 | 0.476 | 6.112 |
| 1.521  | 0.145 | 19.000 | 0.349 | 0.476 | 6.112 |
| -0.269 | 0.791 | 19.000 | 0.681 | 0.476 | 6.112 |
| -1.444 | 0.165 | 19.000 | 0.421 | 0.476 | 6.112 |
| -2.809 | 0.011 | 19.000 | 0.481 | 0.476 | 6.112 |
| 1.913  | 0.071 | 19.000 | 0.428 | 0.476 | 6.112 |
| 1.193  | 0.248 | 19.000 | 0.296 | 0.476 | 6.112 |
| 0.400  | 0.693 | 19.000 | 0.309 | 0.476 | 6.112 |
| 1.500  | 0.150 | 19.000 | 0.432 | 0.476 | 6.112 |
| 0.282  | 0.781 | 19.000 | 0.410 | 0.476 | 6.112 |
| 3.871  | 0.001 | 19.000 | 0.432 | 0.476 | 6.112 |
| 2.748  | 0.013 | 19.000 | 0.434 | 0.476 | 6.112 |
| 1.055  | 0.305 | 19.000 | 0.413 | 0.476 | 6.112 |
| -2.866 | 0.010 | 19.000 | 0.401 | 0.476 | 6.112 |
| -1.728 | 0.100 | 19.000 | 0.442 | 0.476 | 6.112 |

|        |       |        |       |       |       |
|--------|-------|--------|-------|-------|-------|
| 1.735  | 0.099 | 19.000 | 0.394 | 0.476 | 6.112 |
| 0.492  | 0.628 | 19.000 | 0.418 | 0.476 | 6.112 |
| 1.592  | 0.128 | 19.000 | 0.633 | 0.476 | 6.112 |
| -0.829 | 0.417 | 19.000 | 0.720 | 0.476 | 6.112 |
| -2.428 | 0.025 | 19.000 | 0.297 | 0.476 | 6.112 |
| 1.858  | 0.079 | 19.000 | 0.399 | 0.476 | 6.112 |
| 1.570  | 0.133 | 19.000 | 0.686 | 0.476 | 6.112 |
| -0.158 | 0.876 | 19.000 | 0.365 | 0.476 | 6.112 |
| 1.147  | 0.266 | 19.000 | 0.404 | 0.476 | 6.112 |
| 1.541  | 0.140 | 19.000 | 0.594 | 0.476 | 6.112 |
| -1.135 | 0.271 | 19.000 | 0.401 | 0.476 | 6.112 |
| 0.040  | 0.968 | 19.000 | 0.714 | 0.476 | 6.112 |
| -0.034 | 0.973 | 19.000 | 0.370 | 0.476 | 6.112 |
| -0.543 | 0.594 | 19.000 | 0.357 | 0.476 | 6.112 |
| -0.689 | 0.499 | 19.000 | 0.470 | 0.476 | 6.112 |
| 2.081  | 0.051 | 19.000 | 0.361 | 0.476 | 6.112 |
| 0.869  | 0.395 | 19.000 | 0.365 | 0.476 | 6.112 |
| 0.856  | 0.403 | 19.000 | 0.377 | 0.476 | 6.112 |
| 1.446  | 0.164 | 19.000 | 0.306 | 0.476 | 6.112 |
| 1.465  | 0.159 | 19.000 | 0.493 | 0.476 | 6.112 |
| 0.750  | 0.462 | 19.000 | 0.312 | 0.476 | 6.112 |
| -1.648 | 0.116 | 19.000 | 0.308 | 0.476 | 6.112 |
| -1.392 | 0.180 | 19.000 | 0.449 | 0.476 | 6.112 |
| 1.122  | 0.276 | 19.000 | 0.524 | 0.476 | 6.112 |
| -0.319 | 0.753 | 19.000 | 0.529 | 0.476 | 6.112 |
| -1.217 | 0.239 | 19.000 | 0.382 | 0.476 | 6.112 |
| 0.412  | 0.685 | 19.000 | 0.509 | 0.476 | 6.112 |
| 1.144  | 0.267 | 19.000 | 0.285 | 0.476 | 6.112 |
| 1.707  | 0.104 | 19.000 | 0.843 | 0.476 | 6.112 |
| 2.735  | 0.013 | 19.000 | 0.732 | 0.476 | 6.112 |
| -2.067 | 0.053 | 19.000 | 0.642 | 0.476 | 6.112 |
| -0.451 | 0.657 | 19.000 | 0.380 | 0.476 | 6.112 |
| 1.299  | 0.210 | 19.000 | 0.361 | 0.476 | 6.112 |
| 1.680  | 0.109 | 19.000 | 0.403 | 0.476 | 6.112 |
| -1.253 | 0.225 | 19.000 | 0.596 | 0.476 | 6.112 |
| 1.286  | 0.214 | 19.000 | 0.405 | 0.476 | 6.112 |
| -2.634 | 0.016 | 19.000 | 0.391 | 0.476 | 6.112 |
| 2.206  | 0.040 | 19.000 | 0.609 | 0.476 | 6.112 |
| -0.430 | 0.672 | 19.000 | 0.285 | 0.476 | 6.112 |
| -0.114 | 0.910 | 19.000 | 0.532 | 0.476 | 6.112 |
| -0.408 | 0.688 | 19.000 | 0.444 | 0.476 | 6.112 |
| -2.185 | 0.042 | 19.000 | 0.510 | 0.476 | 6.112 |
| -1.672 | 0.111 | 19.000 | 0.412 | 0.476 | 6.112 |
| -0.169 | 0.868 | 19.000 | 0.375 | 0.476 | 6.112 |
| 1.996  | 0.060 | 19.000 | 0.460 | 0.476 | 6.112 |
| 1.784  | 0.090 | 19.000 | 0.535 | 0.476 | 6.112 |
| 0.462  | 0.649 | 19.000 | 0.436 | 0.476 | 6.112 |
| -0.258 | 0.799 | 19.000 | 0.374 | 0.476 | 6.112 |
| 0.406  | 0.690 | 19.000 | 0.458 | 0.476 | 6.112 |
| 0.889  | 0.385 | 19.000 | 0.316 | 0.476 | 6.112 |

|        |       |        |       |       |       |
|--------|-------|--------|-------|-------|-------|
| 1.188  | 0.250 | 19.000 | 0.366 | 0.476 | 6.112 |
| -2.525 | 0.021 | 19.000 | 0.561 | 0.476 | 6.112 |
| -0.372 | 0.714 | 19.000 | 0.482 | 0.476 | 6.112 |
| 0.108  | 0.915 | 19.000 | 0.421 | 0.476 | 6.112 |
| -0.409 | 0.687 | 19.000 | 0.432 | 0.476 | 6.112 |
| -0.901 | 0.379 | 19.000 | 0.482 | 0.476 | 6.112 |
| -0.938 | 0.360 | 19.000 | 0.315 | 0.476 | 6.112 |
| -2.723 | 0.013 | 19.000 | 0.340 | 0.476 | 6.112 |
| 0.823  | 0.420 | 19.000 | 0.329 | 0.476 | 6.112 |
| 1.934  | 0.068 | 19.000 | 0.636 | 0.476 | 6.112 |
| -0.091 | 0.929 | 19.000 | 0.427 | 0.476 | 6.112 |
| -0.723 | 0.478 | 19.000 | 0.394 | 0.476 | 6.112 |
| 2.804  | 0.011 | 19.000 | 0.348 | 0.476 | 6.112 |
